# Supplementary material for: Peritumoral radiomics features predict distant metastasis in locally advanced NSCLC
Source: PubMed Central journal article supplement (PMC6214508; doi:10.1371/journal.pone.0206108), 2018-11-02
Supplement: pone.0206108.s007.pdf [file pone.0206108.s007.pdf]

X general\_info\_BoundingBox

- 1 (6, 6, 5, 11, 11, 14)
- 2 (6, 5, 6, 19, 21, 17)
- 3 (6, 5, 5, 8, 13, 7)
- 4 (5, 6, 5, 18, 20, 21)
- 5 (6, 6, 6, 9, 9, 7)
- 6 (6, 6, 6, 11, 11, 9)
- 8 (5, 6, 6, 12, 10, 5)
- 9 (6, 6, 6, 15, 14, 12)
- 10 (5, 6, 6, 6, 21, 18, 15)
- 11 (5, 6, 6, 6, 25, 19, 24)
- 12 (5, 6, 5, 11, 13, 10)
- 13 (6, 5, 6, 14, 16, 19)
- 14 (6, 5, 6, 19, 18, 16)
- 15 (5, 5, 6, 14, 16, 12)
- 16 (5, 6, 6, 15, 12, 13)
- 17 (6, 6, 6, 33, 28, 36)
- 18 (6, 6, 6, 15, 9, 10)
- 19 (6, 6, 5, 21, 19, 21)
- 20 (6, 6, 6, 10, 11, 11)
- 21 (6, 5, 6, 21, 24, 24)
- 22 (6, 6, 6, 23, 24, 34)
- 23 (6, 6, 6, 15, 12, 21)
- 24 (5, 5, 6, 20, 28, 31)
- 25 (5, 6, 6, 11, 10, 9)
- 26 (6, 6, 5, 18, 22, 16)
- 27 (6, 6, 6, 10, 15, 10)
- 29 (5, 6, 5, 19, 27, 20)
- 30 (5, 5, 6, 16, 32, 15)
- 31 (5, 5, 5, 13, 25, 28)
- 32 (6, 6, 6, 20, 20, 20)
- 33 (6, 6, 6, 19, 29, 27)
- 34 (6, 5, 6, 34, 33, 32)
- 35 (6, 5, 6, 17, 17, 18)
- 36 (6, 5, 6, 5, 5, 5)
- 37 (6, 6, 5, 8, 9, 10)
- 38 (6, 6, 6, 18, 17, 15)
- 39 (5, 5, 6, 21, 32, 30)
- 40 (6, 6, 6, 22, 25, 18)
- 41 (6, 6, 5, 11, 14, 10)
- 42 (6, 5, 6, 14, 13, 13)
- 43 (6, 5, 6, 14, 19, 16)
- 44 (6, 6, 6, 16, 13, 12)
- 45 (5, 6, 6, 25, 14, 14)
- 46 (5, 5, 6, 14, 14, 15)
- 48 (5, 6, 5, 20, 17, 14)
- 49 (6, 6, 6, 22, 35, 26)
- 50 (6, 5, 1, 22, 21, 28)
- 51 (6, 5, 5, 10, 10, 9)
- 52 (6, 6, 5, 5, 6, 6)
- 53 (6, 5, 6, 8, 12, 10)
- 54 (6, 6, 5, 27, 25, 25)
- 55 (5, 5, 6, 12, 12, 11)
- 56 (5, 6, 6, 20, 23, 30)
- 57 (6, 6, 5, 11, 11, 11)
- 58 (5, 6, 6, 29, 44, 34)
- 59 (6, 6, 5, 12, 13, 11)
- 60 (5, 6, 6, 25, 20, 21)
- 61 (6, 6, 5, 18, 13, 15)
- 62 (6, 6, 5, 12, 13, 12)
- 63 (6, 6, 6, 16, 12, 9)
- 64 (6, 5, 5, 17, 19, 16)
- 65 (5, 6, 6, 26, 28, 33)
- 66 (5, 6, 6, 22, 20, 35)
- 67 (5, 5, 6, 23, 27, 19)
- 68 (6, 6, 6, 8, 7, 6)
- 69 (5, 6, 5, 22, 15, 15)
- 70 (6, 6, 6, 10, 8, 8)
- 71 (6, 6, 6, 24, 21, 23)
- 72 (6, 6, 6, 10, 9, 9)
- 73 (6, 6, 6, 19, 23, 20)
- 74 (6, 6, 5, 25, 25, 22)
- 75 (5, 6, 6, 14, 14, 12)
- 76 (6, 6, 6, 25, 31, 29)
- 77 (6, 5, 6, 31, 39, 37)
- 78 (6, 6, 5, 37, 40, 36)
- 79 (5, 6, 6, 15, 17, 12)
- 80 (6, 6, 6, 15, 17, 10)
- 81 (6, 5, 6, 10, 10, 11)
- 82 (6, 5, 5, 21, 19, 12)
- 83 (5, 5, 5, 19, 29, 22)
- 84 (6, 6, 6, 12, 11, 6)
- 85 (6, 6, 6, 18, 23, 11)
- 86 (5, 6, 5, 20, 24, 26)
- 87 (6, 5, 6, 6, 7, 5)
- 88 (6, 5, 6, 24, 27, 26)
- 89 (6, 6, 6, 33, 23, 23)
- 90 (6, 6, 6, 12, 11, 11)
- 91 (5, 6, 6, 16, 26, 13)
- 92 (6, 6, 6, 8, 9, 5)
- 93 (6, 6, 6, 7, 6, 3)
- 94 (5, 5, 5, 28, 34, 21)
- 95 (6, 6, 6, 11, 12, 14)
- 96 (5, 5, 6, 14, 17, 11)
- 107 (6, 6, 6, 24, 25, 23)
- 108 (6, 6, 5, 26, 29, 28)
- 112 (6, 6, 6, 7, 7, 7)
- 114 (6, 6, 6, 16, 13, 13)
- 126 (6, 6, 5, 5, 6, 6)
- 135 (6, 6, 6, 9, 10, 7)
- 139 (6, 5, 5, 17, 15, 12)





| general_info_VoxelNum | original_shape_Maximum3DDiameter | original_shape_Compactness2 | original_shape_Maximum2DDiameterSlice | original_shape_Sphericity | original_shape_Compactness1 | original_shape_Elongation |
|-----------------------|----------------------------------|-----------------------------|---------------------------------------|---------------------------|-----------------------------|---------------------------|
| 706                   | 41.02438299                      | 0.304485403                 | 36.61966685                           | 0.672752767               | 0.029274003                 | 1.157427239               |
| 2077                  | 63.35613625                      | 0.1253789                   | 63.07138812                           | 0.50050469                | 0.018784996                 | 1.137390524               |
| 434                   | 40.02499219                      | 0.315583706                 | 39                                    | 0.680829226               | 0.029802738                 | 1.480940021               |
| 2635                  | 78.05767099                      | 0.108420745                 | 63.78087488                           | 0.476837932               | 0.017468478                 | 1.178934735               |
| 359                   | 31.32091953                      | 0.553696999                 | 27.65863337                           | 0.821152948               | 0.039476166                 | 1.075111024               |
| 643                   | 37.34969879                      | 0.402277541                 | 33.54101966                           | 0.738202076               | 0.033648195                 | 1.0357752                 |
| 337                   | 42.53234064                      | 0.521060506                 | 40.80441153                           | 0.804691448               | 0.038295078                 | 1.830784002               |
| 1002                  | 48.09365863                      | 0.301376511                 | 45.69463864                           | 0.670455257               | 0.029124171                 | 1.355209273               |
| 2079                  | 65.17668295                      | 0.123068678                 | 59.77457654                           | 0.497411526               | 0.018611126                 | 1.194525969               |
| 3098                  | 87.10338685                      | 0.077870826                 | 61.18823416                           | 0.427029877               | 0.014804245                 | 1.465355195               |
| 827                   | 48.09365863                      | 0.298184799                 | 41.67733197                           | 0.668080045               | 0.028969542                 | 1.254166298               |
| 1482                  | 71.8748913                       | 0.199087073                 | 50.91168825                           | 0.583912385               | 0.023671207                 | 1.643811888               |
| 2074                  | 61.4817046                       | 0.135084557                 | 56.36488268                           | 0.513099866               | 0.019498524                 | 1.084775367               |
| 1118                  | 48.55924217                      | 0.24533485                  | 45.89117562                           | 0.626017415               | 0.026277164                 | 1.21209068                |
| 911                   | 53.24471805                      | 0.294092801                 | 39                                    | 0.665009932               | 0.02877008                  | 1.398284468               |
| 6947                  | 127.6322843                      | 0.021048189                 | 98.27003612                           | 0.276103288               | 0.00769673                  | 1.369685278               |
| 698                   | 49.29503018                      | 0.43816177                  | 45.69463864                           | 0.759529816               | 0.035116896                 | 1.512482278               |
| 2332                  | 85.74963557                      | 0.112790709                 | 63.28506933                           | 0.483160151               | 0.017817039                 | 1.802162194               |
| 582                   | 42.42640687                      | 0.440910852                 | 32.44996148                           | 0.761114968               | 0.035226887                 | 1.429327672               |
| 2801                  | 85.4341852                       | 0.061325928                 | 58.94064811                           | 0.394349575               | 0.013137748                 | 1.420209869               |
| 5224                  | 107.5825265                      | 0.05090897                  | 72.56031973                           | 0.370622205               | 0.011970052                 | 1.488584403               |
| 1720                  | 71.37226352                      | 0.163227567                 | 45.69463864                           | 0.546509651               | 0.021433625                 | 1.476832609               |
| 2731                  | 98.08669635                      | 0.058990512                 | 79.20227269                           | 0.389278773               | 0.012885164                 | 1.298122314               |
| 481                   | 41.78516483                      | 0.475209907                 | 34.98571137                           | 0.780360291               | 0.036571403                 | 1.22014039                |
| 1204                  | 70.61161378                      | 0.13298103                  | 61.55485359                           | 0.510422603               | 0.019346113                 | 1.697038763               |
| 694                   | 48.18713521                      | 0.31943069                  | 42.95346319                           | 0.683586207               | 0.029983948                 | 1.705796292               |
| 3466                  | 83.03011502                      | 0.100745436                 | 82.54089895                           | 0.465309365               | 0.016838817                 | 1.098530056               |
| 1433                  | 97.5807358                       | 0.096779193                 | 96.84007435                           | 0.459121185               | 0.016504025                 | 3.06820024                |
| 1765                  | 90.0994451                       | 0.069686876                 | 72.56031973                           | 0.411513099               | 0.014004718                 | 1.121019503               |
| 2542                  | 68.73863542                      | 0.109708476                 | 58.94064811                           | 0.478718335               | 0.01757191                  | 1.072039453               |
| 3179                  | 105.6834897                      | 0.053800779                 | 72.99315036                           | 0.377510923               | 0.012305327                 | 1.768113456               |
| 5930                  | 129.0697486                      | 0.025746416                 | 92.0271699                            | 0.295283328               | 0.008512503                 | 1.166443702               |
| 2033                  | 66.06814664                      | 0.144327778                 | 55.80322571                           | 0.524545672               | 0.020154584                 | 1.208035984               |
| 104                   | 18                               | 0.819962945                 | 15                                    | 0.935976063               | 0.048039225                 | 1.052410496               |
| 332                   | 38.18376618                      | 0.483956064                 | 25.63201124                           | 0.785118683               | 0.036906414                 | 1.549334513               |
| 2020                  | 61.84658438                      | 0.148581151                 | 54.08326913                           | 0.529648695               | 0.020449408                 | 1.043286666               |
| 2880                  | 103.1406806                      | 0.063305027                 | 91.24143795                           | 0.398546868               | 0.013348055                 | 1.372326207               |
| 3354                  | 86.79285685                      | 0.080625681                 | 75.89466384                           | 0.432007346               | 0.015063836                 | 1.142471745               |
| 835                   | 44.39594576                      | 0.384232932                 | 40.80441153                           | 0.726995174               | 0.032884873                 | 1.202990163               |
| 1049                  | 47.52893855                      | 0.229019216                 | 42.95346319                           | 0.611820429               | 0.025388371                 | 1.062107579               |
| 1474                  | 55.64171097                      | 0.203321986                 | 54.74486277                           | 0.588023633               | 0.023921645                 | 1.098021642               |
| 953                   | 48.92851929                      | 0.275541771                 | 47.4341649                            | 0.650722487               | 0.02784791                  | 1.105955238               |
| 1642                  | 73.23933369                      | 0.170206321                 | 72.99315036                           | 0.554189842               | 0.021887024                 | 1.479627385               |
| 1025                  | 56.60388679                      | 0.267038448                 | 40.80441153                           | 0.643958577               | 0.027414844                 | 1.474191638               |
| 1878                  | 66.13622306                      | 0.158372017                 | 53.66563146                           | 0.541035982               | 0.021112424                 | 1.106793852               |
| 2228                  | 118.8696765                      | 0.055763126                 | 98.95453501                           | 0.382046041               | 0.012527731                 | 1.393090567               |
| 4266                  | 85.85452813                      | 0.084862078                 | 68.41052551                           | 0.439445026               | 0.015454527                 | 1.273091453               |
| 583                   | 36.61966685                      | 0.391118402                 | 34.20526275                           | 0.731312085               | 0.033178214                 | 1.05890169                |
| 134                   | 21.21320344                      | 0.822906564                 | 17.49285568                           | 0.937094759               | 0.048125376                 | 1.138241693               |
| 497                   | 37.34969879                      | 0.527848804                 | 31.32091953                           | 0.808170848               | 0.038543722                 | 1.342481209               |
| 3424                  | 87.20665112                      | 0.061292004                 | 80.77747211                           | 0.394276846               | 0.013134114                 | 1.181732459               |
| 827                   | 42.42640687                      | 0.282357555                 | 35.11409973                           | 0.656044256               | 0.028190228                 | 1.120927016               |
| 3821                  | 90.09994451                      | 0.070309105                 | 63.5688603                            | 0.412734263               | 0.014067103                 | 1.38344691                |
| 591                   | 36.24913792                      | 0.382444368                 | 34.98571137                           | 0.725865391               | 0.032808246                 | 1.15300422                |
| 6523                  | 154.2011673                      | 0.014945268                 | 128.26535                             | 0.246320887               | 0.006485609                 | 1.78376296                |
| 879                   | 44.59820624                      | 0.309830439                 | 40.24922359                           | 0.676666528               | 0.029529828                 | 1.134363136               |
| 2193                  | 99                               | 0.166608774                 | 70.22819946                           | 0.550257482               | 0.021654483                 | 1.827696947               |
| 1293                  | 68.47627326                      | 0.265927473                 | 54.08326913                           | 0.643064303               | 0.027357757                 | 1.706122359               |
| 814                   | 43.78358556                      | 0.323886454                 | 41.67733197                           | 0.686748303               | 0.030192235                 | 1.115985732               |
| 881                   | 48.09365863                      | 0.233389352                 | 45.89117562                           | 0.615687514               | 0.025629456                 | 1.343067921               |
| 2119                  | 63.5688603                       | 0.133487674                 | 56.04462508                           | 0.51107                   | 0.019382931                 | 1.107982008               |
| 5478                  | 106.1508361                      | 0.033752732                 | 76.89603371                           | 0.323173923               | 0.009746604                 | 1.387310674               |
| 3090                  | 118.224363                       | 0.038171065                 | 70.80254233                           | 0.336701275               | 0.010364922                 | 1.692366793               |
| 2731                  | 82.15838363                      | 0.083284728                 | 75.23961722                           | 0.436705294               | 0.015310225                 | 1.323064982               |
| 217                   | 24.55605832                      | 0.746283943                 | 24.18677324                           | 0.90705725                | 0.045830113                 | 1.104814609               |
| 1553                  | 72.62231062                      | 0.104035271                 | 60.67124525                           | 0.470320094               | 0.017111543                 | 1.541572375               |
| 394                   | 33.27160952                      | 0.578738647                 | 30.88689042                           | 0.833350106               | 0.040358974                 | 1.189020627               |
| 3197                  | 81.88406438                      | 0.065885397                 | 70.80254233                           | 0.403889959               | 0.013617377                 | 1.277686613               |
| 446                   | 31.46426545                      | 0.569497942                 | 28.46049894                           | 0.828890928               | 0.040035472                 | 1.073353008               |
| 2011                  | 69.84268036                      | 0.081679198                 | 67.08203932                           | 0.433880856               | 0.015161934                 | 1.133716314               |
| 3040                  | 90.44888059                      | 0.069070072                 | 76.66159404                           | 0.410295389               | 0.013942602                 | 1.35215091                |
| 1129                  | 52.13444159                      | 0.234907886                 | 47.4341649                            | 0.61701994                | 0.02512717                  | 1.370230739               |
| 5168                  | 104.1393297                      | 0.032360198                 | 90.24965374                           | 0.318666974               | 0.009543429                 | 1.141704262               |
| 6716                  | 127.2084903                      | 0.027551503                 | 117.8812962                           | 0.302028852               | 0.008805855                 | 1.221063418               |
| 9180                  | 123.073149                       | 0.025351834                 | 115.4123044                           | 0.293767081               | 0.008447021                 | 1.027186751               |
| 1116                  | 62.20932406                      | 0.280387296                 | 56.60388679                           | 0.654514759               | 0.028091701                 | 1.495184969               |
| 1117                  | 55.72252686                      | 0.264416528                 | 53.66563146                           | 0.641844069               | 0.027279925                 | 1.321723685               |
| 610                   | 38.06573262                      | 0.396459186                 | 34.20526275                           | 0.734625775               | 0.033403973                 | 1.154952343               |
| 1764                  | 65.31462317                      | 0.170403589                 | 61.18823416                           | 0.554403861               | 0.021899704                 | 1.034765553               |
| 2846                  | 91.6351461                       | 0.079506927                 | 82.54089895                           | 0.429999868               | 0.014958959                 | 1.080678048               |
| 504                   | 45.49725266                      | 0.46601511                  | 44.59820624                           | 0.775294434               | 0.036215866                 | 1.295816422               |
| 1341                  | 72.0624729                       | 0.142702499                 | 69.26037828                           | 0.522569261               | 0.020040782                 | 1.734910899               |
| 2792                  | 82.81304245                      | 0.046607715                 | 73.05477397                           | 0.359875767               | 0.011453225                 | 1.054698352               |
| 145                   | 21.21320344                      | 0.755044586                 | 20.1246118                            | 0.910592773               | 0.046098328                 | 1.17553699                |
| 3391                  | 85.38149682                      | 0.051796293                 | 78.74642849                           | 0.372763081               | 0.012073918                 | 1.108288022               |
| 5476                  | 99.13626985                      | 0.068918085                 | 98.95453501                           | 0.40999422                | 0.013927253                 | 1.412734726               |
| 778                   | 41.35214626                      | 0.282054283                 | 34.98571137                           | 0.655809293               | 0.028175084                 | 1.087683019               |
| 1552                  | 88.43641784                      | 0.203397992                 | 73.05477397                           | 0.588096896               | 0.023926116                 | 1.239822057               |
| 183                   | 29.08607914                      | 0.594528223                 | 28.3019434                            | 0.840860901               | 0.040905821                 | 1.587516475               |
| 105                   | 22.44994432                      | 0.657620663                 | 21.6330765                            | 0.869611252               | 0.043021604                 | 1.193885701               |
| 3975                  | 124.8519123                      | 0.062250689                 | 96.93296653                           | 0.396321884               | 0.013236433                 | 1.716211788               |
| 706                   | 48.592851929                     | 0.290166374                 | 32.44996148                           | 0.662037151               | 0.028577381                 | 1.592850109               |
| 1022                  | 51.70106382                      | 0.243157744                 | 48.46648326                           | 0.624160147               | 0.026160313                 | 1.323953316               |
| 4090                  | 93.1933474                       | 0.06672959                  | 78.74642849                           | 0.405607663               | 0.013704339                 | 1.197101982               |
| 5806                  | 96.04686356                      | 0.044744207                 | 85.90692638                           | 0.355014102               | 0.011221923                 | 1.025034466               |
| 253                   | 28.14249456                      | 0.739036849                 | 23.43074903                           | 0.904111578               | 0.045607044                 | 1.156163764               |
| 1216                  | 53.16013544                      | 0.215722069                 | 47.4341649                            | 0.599742546               | 0.02464031                  | 1.356139869               |
| 123                   | 21.21320344                      | 0.768128444                 | 17.49285568                           | 0.915822444               | 0.046496022                 | 1.255845816               |
| 379                   | 31.32091953                      | 0.616853495                 | 30                                    | 0.851256962               | 0.041666775                 | 1.028701923               |
| 807                   | 58.55766389                      | 0.26374757                  | 50.28916384                           | 0.641302337               | 0.027245395                 | 1.502992265               |

| original_shape_SurfaceVolumeRatio | original_shape_Volume | original_shape_SphericalDisproportion | original_shape_Flatness | original_shape_SurfaceArea | original_shape_Maximum2DDiameterColumn |
|-----------------------------------|-----------------------|---------------------------------------|-------------------------|----------------------------|----------------------------------------|
| 0.269095113                       | 19062                 | 1.486430156                           | 1.127304415             | 5129.491039                | 40.02499219                            |
| 0.252430922                       | 56079                 | 1.997983276                           | 1.172006132             | 14156.07365                | 57.93962375                            |
| 0.312724161                       | 11718                 | 1.46879711                            | 1.237281793             | 3664.501719                | 27.65863337                            |
| 0.244755166                       | 71145                 | 2.097148596                           | 1.258379411             | 17413.10629                | 65.7951366                             |
| 0.276210805                       | 9693                  | 1.217799926                           | 1.247420787             | 2677.311333                | 30                                     |
| 0.252998114                       | 17361                 | 1.354642628                           | 1.150910578             | 4392.300253                | 34.98571137                            |
| 0.287865874                       | 9099                  | 1.24271235                            | 1.446924826             | 2619.291592                | 29.54657341                            |
| 0.240272368                       | 27054                 | 1.491523841                           | 1.053971054             | 6500.328647                | 46.95742753                            |
| 0.253919193                       | 56133                 | 2.010407776                           | 1.129963712             | 14253.24605                | 62.64183905                            |
| 0.258946953                       | 83646                 | 2.341756525                           | 1.062671795             | 21659.87679                | 85.80209788                            |
| 0.257058834                       | 22329                 | 1.496826626                           | 1.095779976             | 5739.866701                | 36.12478374                            |
| 0.242139578                       | 40014                 | 1.712585699                           | 1.326368858             | 9688.973085                | 53.66563146                            |
| 0.246353111                       | 55998                 | 1.948938338                           | 1.097808003             | 13795.28151                | 59.09314681                            |
| 0.248101384                       | 30186                 | 1.59739965                            | 1.021149881             | 7489.188377                | 42.95346319                            |
| 0.25005101                        | 24597                 | 1.50373694                            | 1.183709663             | 6150.504688                | 49.2036584                             |
| 0.305979402                       | 187569                | 3.621832998                           | 1.150745095             | 57392.25044                | 122.4499898                            |
| 0.239257872                       | 18846                 | 1.316604007                           | 1.337196499             | 4509.053847                | 42.95346319                            |
| 0.251591277                       | 62964                 | 2.069707111                           | 1.078242094             | 15841.19316                | 60                                     |
| 0.253671462                       | 15714                 | 1.313861955                           | 1.064429653             | 3986.193355                | 34.98571137                            |
| 0.289986062                       | 7627                  | 2.535821171                           | 1.243177118             | 21930.77587                | 75.71657678                            |
| 0.250666931                       | 141048                | 2.69816537                            | 1.135072132             | 35356.06932                | 105.3422992                            |
| 0.246181578                       | 64440                 | 1.829793854                           | 1.346646684             | 11432.6725                 | 65.8634952                             |
| 0.296252198                       | 73737                 | 2.568853147                           | 1.745783125             | 21844.74831                | 86.58521814                            |
| 0.263644884                       | 12987                 | 1.281459361                           | 1.481188727             | 3423.956113                | 33.9411255                             |
| 0.29686396                        | 32508                 | 1.959160888                           | 1.274020891             | 9650.453608                | 51                                     |
| 0.266348193                       | 18738                 | 1.462873285                           | 1.064090813             | 4990.832445                | 28.46049894                            |
| 0.228917094                       | 93582                 | 2.149107831                           | 1.316673132             | 21422.51947                | 67.41661516                            |
| 0.311425001                       | 38691                 | 2.178074184                           | 1.260297618             | 12049.3447                 | 43.68065934                            |
| 0.324138762                       | 47655                 | 2.4300563                             | 2.421664122             | 15446.83269                | 84.48076704                            |
| 0.246731326                       | 68634                 | 2.08891101                            | 1.069101385             | 16934.15785                | 64.41273166                            |
| 0.290404386                       | 85833                 | 2.648929972                           | 1.449020724             | 24926.27966                | 83.57032966                            |
| 0.301605353                       | 160110                | 3.386577921                           | 1.182750136             | 48290.033                  | 106.0235823                            |
| 0.242586764                       | 54891                 | 1.906411688                           | 1.144697414             | 13315.83009                | 61.55485359                            |
| 0.366229801                       | 2808                  | 1.068403391                           | 1.111970098             | 1028.373282                | 16.97056275                            |
| 0.296516043                       | 8964                  | 1.273692783                           | 1.381639715             | 2657.969814                | 34.20526275                            |
| 0.240763791                       | 54540                 | 1.888043925                           | 1.191392136             | 13131.25719                | 55.15432893                            |
| 0.284284146                       | 77760                 | 2.509115189                           | 1.827479322             | 22105.93516                | 88.28363382                            |
| 0.249278057                       | 90558                 | 2.314775452                           | 1.269766561             | 22574.12233                | 70.80254233                            |
| 0.235470144                       | 22545                 | 1.375524949                           | 1.160861984             | 5308.674401                | 34.20526275                            |
| 0.259306697                       | 28323                 | 1.634466507                           | 1.066701803             | 7344.343569                | 44.29446918                            |
| 0.240880842                       | 39798                 | 1.700611922                           | 1.316706162             | 9586.575762                | 48.83646179                            |
| 0.251730645                       | 25731                 | 1.536753408                           | 1.262170167             | 6477.281215                | 46.57252409                            |
| 0.246554684                       | 44334                 | 1.804435815                           | 1.404363092             | 10930.75536                | 72.24956747                            |
| 0.248273471                       | 27675                 | 1.552894916                           | 1.129430646             | 6870.968311                | 45.69463864                            |
| 0.241493173                       | 50706                 | 1.848305906                           | 1.278675026             | 12245.15284                | 64.89992296                            |
| 0.323054234                       | 60156                 | 2.617485574                           | 3.015407031             | 19433.65052                | 96.04686356                            |
| 0.226178524                       | 115182                | 2.275597493                           | 1.159296014             | 26051.69478                | 85.38149682                            |
| 0.263858204                       | 15741                 | 1.367405272                           | 1.135358539             | 4153.391984                | 32.44996148                            |
| 0.336158756                       | 3618                  | 1.067127941                           | 1.146421357             | 1216.22238                 | 19.20937271                            |
| 0.251810727                       | 13419                 | 1.237362128                           | 1.069870404             | 3379.048141                | 29.69848481                            |
| 0.271258701                       | 92448                 | 2.53628893                            | 1.169785649             | 25077.32437                | 80.04998438                            |
| 0.261774836                       | 22329                 | 1.52428741                            | 1.056813312             | 5845.170307                | 38.18376618                            |
| 0.249823526                       | 103167                | 2.422866451                           | 1.237331352             | 25773.5437                 | 88.8425737                             |
| 0.264633174                       | 15957                 | 1.377665904                           | 1.102862973             | 4222.751562                | 32.44996148                            |
| 0.350250827                       | 176121                | 4.059745036                           | 1.04461016              | 61686.52595                | 98.95453501                            |
| 0.248690131                       | 23733                 | 1.477832816                           | 1.06318268              | 5902.162876                | 38.41874542                            |
| 0.225484851                       | 59211                 | 1.817331037                           | 1.58114774              | 13351.18351                | 73.23933369                            |
| 0.230095942                       | 34911                 | 1.55505444                            | 1.232417628             | 8032.879425                | 55.31726674                            |
| 0.251395292                       | 21978                 | 1.456137563                           | 1.198806817             | 5525.165726                | 39.11521443                            |
| 0.273113953                       | 23787                 | 1.624200552                           | 1.250656561             | 6496.561588                | 46.57252409                            |
| 0.24556822                        | 57213                 | 1.956679123                           | 1.093163785             | 14049.69457                | 54.08326913                            |
| 0.282956201                       | 147906                | 3.094309065                           | 1.103659768             | 41850.91993                | 97.67292358                            |
| 0.328699176                       | 83430                 | 2.969991726                           | 1.434644458             | 27423.37229                | 111.3642672                            |
| 0.264078988                       | 73737                 | 2.289873774                           | 1.171501044             | 19472.3923                 | 63.28506933                            |
| 0.295738768                       | 5859                  | 1.102466244                           | 1.174706395             | 1732.733442                | 22.84731932                            |
| 0.295968518                       | 41931                 | 2.126211516                           | 1.501333413             | 12410.25591                | 66.40783086                            |
| 0.263857819                       | 10638                 | 1.199975848                           | 1.232196806             | 2806.919475                | 30                                     |
| 0.270926987                       | 86319                 | 2.475921912                           | 1.16530292              | 23386.14662                | 72.12489168                            |
| 0.254538725                       | 12042                 | 1.206431349                           | 1.073445087             | 3065.155324                | 28.46049894                            |
| 0.29434389                        | 54297                 | 2.304780187                           | 1.331148212             | 15981.99018                | 59.09314681                            |
| 0.27121167                        | 82080                 | 2.437268433                           | 1.384666817             | 22261.05384                | 72.12489168                            |
| 0.250899054                       | 30483                 | 1.620693166                           | 1.134776282             | 7648.155854                | 45                                     |
| 0.292584722                       | 139536                | 3.138072288                           | 1.3686016               | 40826.10182                | 96.74709298                            |
| 0.282885623                       | 181332                | 3.310941963                           | 1.228695689             | 51296.21572                | 114.2365966                            |
| 0.262066906                       | 247860                | 3.404057375                           | 1.311514355             | 64955.90323                | 112.3298714                            |
| 0.237440808                       | 30132                 | 1.527849428                           | 1.294783844             | 7154.566416                | 45.79301257                            |
| 0.242055867                       | 30159                 | 1.558010813                           | 1.334317223             | 7300.162881                | 43.26661531                            |
| 0.258733957                       | 16470                 | 1.361237292                           | 1.036188698             | 4261.348265                | 36.61966685                            |
| 0.240641447                       | 47628                 | 1.803739242                           | 1.628004975             | 11461.27083                | 61.84658438                            |
| 0.264534863                       | 76842                 | 2.325582107                           | 1.555742749             | 20327.38792                | 67.41661516                            |
| 0.261267882                       | 13608                 | 1.289832554                           | 1.782663441             | 3555.33341                 | 35.11409973                            |
| 0.279732387                       | 36207                 | 1.913621935                           | 1.321727833             | 10128.27053                | 52.39274759                            |
| 0.318105952                       | 75384                 | 2.778736698                           | 1.722996976             | 23980.09908                | 80.49844719                            |
| 0.336963352                       | 3915                  | 1.098185742                           | 1.138421687             | 1319.211523                | 19.20937271                            |
| 0.287841923                       | 91557                 | 2.682669102                           | 1.385128574             | 26353.94292                | 77.4209274                             |
| 0.223064601                       | 147852                | 2.439058775                           | 1.090466324             | 32980.54738                | 96.42095208                            |
| 0.267254753                       | 21006                 | 1.524833532                           | 1.033379618             | 5613.953344                | 35.11409973                            |
| 0.236746414                       | 41904                 | 1.700400064                           | 1.378229048             | 9920.621748                | 45                                     |
| 0.337666789                       | 4941                  | 1.189257342                           | 1.164268979             | 1668.411604                | 21.63330765                            |
| 0.392923454                       | 2835                  | 1.149939123                           | 1.914062226             | 1113.937992                | 18.97366596                            |
| 0.256764969                       | 107325                | 2.523201571                           | 1.127595482             | 27557.30031                | 84.05355436                            |
| 0.273450639                       | 19062                 | 1.510489251                           | 1.161083346             | 5212.516072                | 41.78516483                            |
| 0.256399123                       | 27594                 | 1.602152917                           | 1.063288933             | 7075.077413                | 40.24922359                            |
| 0.248512907                       | 110430                | 2.465436654                           | 1.266641239             | 27443.28027                | 82.37718131                            |
| 0.252633877                       | 156762                | 2.816789512                           | 1.214863564             | 39603.39189                | 87.20665112                            |
| 0.281903628                       | 6831                  | 1.106058172                           | 1.183184849             | 1925.683682                | 25.45584412                            |
| 0.251818028                       | 32832                 | 1.667382123                           | 1.033131858             | 8267.689503                | 48.83646179                            |
| 0.353929327                       | 3321                  | 1.091914712                           | 1.087202109             | 1175.399295                | 17.49285568                            |
| 0.261671118                       | 10233                 | 1.174733418                           | 1.303887652             | 2677.68055                 | 26.83281573                            |
| 0.269986596                       | 21789                 | 1.559326924                           | 1.367530932             | 5882.737931                | 55.80322571                            |

| original_shape_Maximum2DDiameterRow | log.sigma.5.0.mm.3D_gldm_GrayLevelVariance | log.sigma.5.0.mm.3D_gldm_HighGrayLevelEmphasis | log.sigma.5.0.mm.3D_gldm_GrayLevelNonUniformityNormalized |
|-------------------------------------|--------------------------------------------|------------------------------------------------|-----------------------------------------------------------|
| 40.02499219                         | 43.45610871                                | 309.8484419                                    | 0.043259315                                               |
| 59.77457654                         | 21.85941957                                | 202.3134328                                    | 0.065741694                                               |
| 36.49657518                         | 19.13135233                                | 160.3248848                                    | 0.063762237                                               |
| 72.62231062                         | 29.3407755                                 | 360.940038                                     | 0.051829661                                               |
| 28.3019434                          | 45.19857853                                | 395.1699164                                    | 0.043039703                                               |
| 33.54101966                         | 24.15144794                                | 202.8289269                                    | 0.059231006                                               |
| 25.63201124                         | 14.82555979                                | 87.25222552                                    | 0.080435682                                               |
| 42.63801121                         | 50.90029123                                | 350.5145701                                    | 0.039430122                                               |
| 52.39274759                         | 39.88662872                                | 412.4564695                                    | 0.044472069                                               |
| 71.30918594                         | 22.45282052                                | 190.9496449                                    | 0.060361315                                               |
| 43.26661531                         | 29.41200622                                | 250.2237001                                    | 0.053948582                                               |
| 59.16924877                         | 29.19687123                                | 196.1504723                                    | 0.051836614                                               |
| 53.16013544                         | 28.99886086                                | 164.0694311                                    | 0.051914738                                               |
| 47.4341649                          | 27.17668914                                | 288.1234347                                    | 0.055075349                                               |
| 36.49657518                         | 27.75716484                                | 251.2777168                                    | 0.054857029                                               |
| 113.0884609                         | 12.31167314                                | 262.4996401                                    | 0.114485835                                               |
| 32.44996148                         | 32.81600315                                | 277.3037249                                    | 0.050512722                                               |
| 70.29224708                         | 36.35367778                                | 226.4789888                                    | 0.047070514                                               |
| 40.36087214                         | 41.53674673                                | 438.8608247                                    | 0.049178682                                               |
| 82.97590012                         | 16.60394302                                | 131.1802928                                    | 0.073534328                                               |
| 103.4456379                         | 13.3824355                                 | 187.931853                                     | 0.079988198                                               |
| 63.5688603                          | 26.42147073                                | 206.152907                                     | 0.054969578                                               |
| 96.93296653                         | 21.17963585                                | 252.0838521                                    | 0.065275601                                               |
| 34.20526275                         | 30.45899698                                | 235.8835759                                    | 0.050790756                                               |
| 66.40783086                         | 14.16485124                                | 104.0207641                                    | 0.073913367                                               |
| 45.79301257                         | 32.49373593                                | 240.3270893                                    | 0.049622537                                               |
| 76.4852927                          | 14.3313951                                 | 179.8612233                                    | 0.08816634                                                |
| 94.20191081                         | 22.37702174                                | 153.4180042                                    | 0.059912179                                               |
| 85.38149682                         | 33.74696402                                | 287.7926346                                    | 0.047429961                                               |
| 64.41273166                         | 22.46910967                                | 205.9213218                                    | 0.062200043                                               |
| 99.04544412                         | 18.12694566                                | 150.8222712                                    | 0.068355056                                               |
| 104.6565813                         | 25.34016033                                | 258.3838111                                    | 0.058501347                                               |
| 52.39274759                         | 33.5363042                                 | 288.372848                                     | 0.048112925                                               |
| 16.97056275                         | 22.75508506                                | 124.1057692                                    | 0.065643491                                               |
| 33.9411255                          | 25.66167078                                | 274.1987952                                    | 0.062146175                                               |
| 60                                  | 33.05881066                                | 261.7420792                                    | 0.048546711                                               |
| 101.8233765                         | 29.09930363                                | 175.4756944                                    | 0.05388479                                                |
| 72.99315036                         | 20.38349176                                | 169.4651163                                    | 0.062980718                                               |
| 41.78516483                         | 25.2104041                                 | 329.7233533                                    | 0.067813116                                               |
| 39.11521443                         | 31.52614365                                | 247.1315539                                    | 0.051698426                                               |
| 54.08326913                         | 21.5790868                                 | 256.3297151                                    | 0.06500463                                                |
| 42.63801121                         | 43.74717273                                | 333.818468                                     | 0.043788379                                               |
| 49.2036584                          | 32.49353229                                | 271.6309379                                    | 0.048947319                                               |
| 55.31726674                         | 43.77889732                                | 320.0195122                                    | 0.042986794                                               |
| 55.07267925                         | 28.40148556                                | 225.8503727                                    | 0.052949856                                               |
| 93.77099765                         | 14.8455408                                 | 80.41337522                                    | 0.079887445                                               |
| 82.97590012                         | 23.99944661                                | 243.0269573                                    | 0.057191711                                               |
| 33.9411255                          | 32.88664829                                | 238.8559177                                    | 0.049989885                                               |
| 19.20937271                         | 18.29494319                                | 140.6119403                                    | 0.067052796                                               |
| 36.24913792                         | 45.77288277                                | 474.1046278                                    | 0.049726933                                               |
| 80.77747211                         | 22.49585117                                | 190.5858645                                    | 0.060509344                                               |
| 40.36087214                         | 33.8978432                                 | 230.5755744                                    | 0.05074942                                                |
| 87.20665112                         | 28.57283524                                | 248.6226119                                    | 0.054562929                                               |
| 34.20526275                         | 21.76266674                                | 202.4399323                                    | 0.062502684                                               |
| 149.2179614                         | 17.73286435                                | 169.4534723                                    | 0.089446842                                               |
| 41.67733197                         | 37.77706593                                | 328.7531286                                    | 0.046014902                                               |
| 65.7951366                          | 34.44178665                                | 304.1171911                                    | 0.046580528                                               |
| 47.4341649                          | 34.76159869                                | 497.8600155                                    | 0.054585671                                               |
| 40.36087214                         | 28.06567048                                | 210.514742                                     | 0.054135552                                               |
| 35.11409973                         | 20.89214738                                | 164.7832009                                    | 0.060955137                                               |
| 61.77378085                         | 36.66105113                                | 207.6422841                                    | 0.046598106                                               |
| 99.72462083                         | 32.67523601                                | 276.6518802                                    | 0.050419075                                               |
| 96.74709298                         | 13.9945807                                 | 134.6530744                                    | 0.083078937                                               |
| 77.12976079                         | 14.78741831                                | 172.0322226                                    | 0.081212079                                               |
| 20.1246118                          | 30.18488394                                | 202.1935484                                    | 0.053876702                                               |
| 48.83646179                         | 26.986739                                  | 218.166774                                     | 0.056122603                                               |
| 29.69848481                         | 43.11747275                                | 369.4974619                                    | 0.045736814                                               |
| 68.47627326                         | 38.2386633                                 | 245.0153269                                    | 0.04628391                                                |
| 28.3019434                          | 42.49832593                                | 334.1726457                                    | 0.047246074                                               |
| 64.76109943                         | 27.05646542                                | 190.0726007                                    | 0.05429437                                                |
| 88.23264702                         | 31.32295663                                | 217.6993421                                    | 0.050485197                                               |
| 46.86149806                         | 40.89855104                                | 277.4968999                                    | 0.043239626                                               |
| 94.86832981                         | 20.4958615                                 | 159.8436533                                    | 0.064701943                                               |
| 115.4123044                         | 16.59164879                                | 217.6392198                                    | 0.070206145                                               |
| 118.3765179                         | 19.24111496                                | 191.5196078                                    | 0.078150664                                               |
| 51.26402247                         | 42.72455631                                | 373.4363799                                    | 0.044123598                                               |
| 48.37354649                         | 28.58409908                                | 205.2336616                                    | 0.051550507                                               |
| 32.44996148                         | 41.7361032                                 | 257.2                                          | 0.043418436                                               |
| 54.74486277                         | 30.90692246                                | 168.0119048                                    | 0.049825561                                               |
| 89.19641248                         | 21.82088607                                | 291.9992973                                    | 0.059811727                                               |
| 32.31098884                         | 52.88378685                                | 350.0357143                                    | 0.040320295                                               |
| 67.08203932                         | 30.3234589                                 | 254.9209545                                    | 0.050370882                                               |
| 77.12976079                         | 29.94919736                                | 299.1583095                                    | 0.053924537                                               |
| 20.1246118                          | 10.6870868                                 | 102.1862069                                    | 0.091652794                                               |
| 81.60882305                         | 22.16067216                                | 160.0967266                                    | 0.060177595                                               |
| 75.17978452                         | 17.556249                                  | 191.3424032                                    | 0.073051888                                               |
| 40.36087214                         | 41.46686349                                | 245.9421594                                    | 0.043668757                                               |
| 75                                  | 48.72342596                                | 622.9001289                                    | 0.041935414                                               |
| 24.18677324                         | 22.89993729                                | 186.4043716                                    | 0.065902237                                               |
| 16.15549442                         | 21.18603175                                | 119.8571429                                    | 0.068662132                                               |
| 89.04493248                         | 27.18601005                                | 352.8636478                                    | 0.058969123                                               |
| 47.4341649                          | 38.98042677                                | 194.6997167                                    | 0.044908474                                               |
| 49.47726751                         | 16.23934211                                | 101.0342466                                    | 0.06924759                                                |
| 85.80209788                         | 20.19157113                                | 168.108313                                     | 0.064098254                                               |
| 88.23264702                         | 19.84355844                                | 141.442299                                     | 0.065017492                                               |
| 25.45584412                         | 60.86159759                                | 446.7588933                                    | 0.042072209                                               |
| 45                                  | 29.77950788                                | 269.7236842                                    | 0.051951231                                               |
| 19.20937271                         | 18.13576575                                | 90.04065041                                    | 0.066693106                                               |
| 28.46049894                         | 19.16548896                                | 197.2717678                                    | 0.065990908                                               |
| 43.68065934                         | 38.79459316                                | 236.9516729                                    | 0.048760152                                               |

| log.sigma.5.0.mm.3D_gldm_DependenceEntropy | log.sigma.5.0.mm.3D_gldm_DependenceNonUniformity | log.sigma.5.0.mm.3D_gldm_GrayLevelNonUniformity | log.sigma.5.0.mm.3D_gldm_SmallDependenceEmphasis |
|--------------------------------------------|--------------------------------------------------|-------------------------------------------------|--------------------------------------------------|
| 6.630199096                                | 176.5014164                                      | 30.54107649                                     | 0.338786917                                      |
| 7.065647417                                | 283.966779                                       | 136.5454983                                     | 0.207420611                                      |
| 6.242193957                                | 92.28110599                                      | 27.67281106                                     | 0.258533536                                      |
| 6.947771806                                | 512.944592                                       | 136.5711575                                     | 0.268633643                                      |
| 6.462984839                                | 86.77158774                                      | 15.45125348                                     | 0.308563912                                      |
| 6.324226221                                | 152.5583204                                      | 38.08553655                                     | 0.24740415                                       |
| 6.224330721                                | 48.54302671                                      | 27.10682493                                     | 0.1828464                                        |
| 6.749674567                                | 260.9001996                                      | 39.50898204                                     | 0.363136488                                      |
| 6.955733956                                | 431.9023569                                      | 92.45743146                                     | 0.292144301                                      |
| 6.873800459                                | 522.1078115                                      | 186.9993544                                     | 0.233265969                                      |
| 6.430531759                                | 196.8573156                                      | 44.61547763                                     | 0.275805434                                      |
| 6.825160007                                | 294.2537112                                      | 76.82186235                                     | 0.242591389                                      |
| 6.947614165                                | 380.6422372                                      | 107.6711668                                     | 0.19877547                                       |
| 6.541515437                                | 250.1144902                                      | 61.57423971                                     | 0.265663702                                      |
| 6.657023678                                | 183.6520307                                      | 49.97475302                                     | 0.263804496                                      |
| 7.227108309                                | 531.3618828                                      | 795.3330934                                     | 0.118212914                                      |
| 6.431343878                                | 168.9885387                                      | 35.25787966                                     | 0.305083324                                      |
| 6.923420097                                | 482.4871355                                      | 109.7684391                                     | 0.283831921                                      |
| 6.643876684                                | 128.1580756                                      | 28.62199313                                     | 0.312071139                                      |
| 6.859605447                                | 415.8711175                                      | 205.9696537                                     | 0.173755331                                      |
| 6.983310496                                | 673.2320061                                      | 417.8583461                                     | 0.153575583                                      |
| 6.762706485                                | 331.8093023                                      | 94.54767442                                     | 0.24059662                                       |
| 6.682072198                                | 498.5825705                                      | 178.2676675                                     | 0.226295886                                      |
| 6.604734153                                | 92.09355509                                      | 24.43035343                                     | 0.278712363                                      |
| 6.522120194                                | 191.269103                                       | 88.99169435                                     | 0.223906783                                      |
| 6.466643229                                | 159.3832853                                      | 34.43804035                                     | 0.340762088                                      |
| 7.180844346                                | 350.4616272                                      | 305.5845355                                     | 0.138425825                                      |
| 6.630994427                                | 273.8709002                                      | 85.85415213                                     | 0.228862391                                      |
| 6.622941598                                | 429.0067989                                      | 83.71388102                                     | 0.324055305                                      |
| 7.193475639                                | 338.3587726                                      | 158.1125098                                     | 0.210711251                                      |
| 6.639674057                                | 534.6533501                                      | 217.3007235                                     | 0.221681686                                      |
| 7.172631955                                | 933.13457                                        | 346.9129848                                     | 0.214716062                                      |
| 6.898640948                                | 428.03394                                        | 97.813576                                       | 0.262031276                                      |
| 5.386697502                                | 24.53846154                                      | 6.826923077                                     | 0.364252137                                      |
| 6.083960918                                | 73.69277108                                      | 20.63253012                                     | 0.29309488                                       |
| 6.783182275                                | 442.6148515                                      | 98.06435644                                     | 0.283631199                                      |
| 6.874962163                                | 530.7381944                                      | 155.1881944                                     | 0.261441752                                      |
| 6.972837846                                | 525.8449612                                      | 211.2373286                                     | 0.18161429                                       |
| 6.751778679                                | 134.0754491                                      | 56.6239521                                      | 0.208493686                                      |
| 6.752481542                                | 213.5719733                                      | 54.23164919                                     | 0.317242449                                      |
| 6.950251006                                | 225.2713704                                      | 95.81682497                                     | 0.207165909                                      |
| 6.632621475                                | 238.0912907                                      | 41.73032529                                     | 0.322717561                                      |
| 6.623856672                                | 395.8148599                                      | 80.37149817                                     | 0.299081167                                      |
| 6.691758733                                | 254.2663415                                      | 44.06146341                                     | 0.339256894                                      |
| 6.928924266                                | 339.5697551                                      | 99.43982961                                     | 0.243126382                                      |
| 6.787530145                                | 278.989228                                       | 177.989228                                      | 0.18416746                                       |
| 7.029519627                                | 712.2165963                                      | 243.9798406                                     | 0.216874249                                      |
| 6.365157706                                | 144.7701544                                      | 29.14408233                                     | 0.320606284                                      |
| 5.453012818                                | 33.04477612                                      | 8.985074627                                     | 0.319369818                                      |
| 6.437998319                                | 122.0301811                                      | 24.71428571                                     | 0.343459228                                      |
| 6.970706311                                | 568.0251168                                      | 207.1839953                                     | 0.212776795                                      |
| 6.323794868                                | 213.1378476                                      | 41.96977025                                     | 0.334329887                                      |
| 7.014646144                                | 713.1277153                                      | 208.4849516                                     | 0.255309882                                      |
| 6.390234751                                | 123.0067682                                      | 36.93908629                                     | 0.244347936                                      |
| 7.045536072                                | 733.5877664                                      | 583.4617507                                     | 0.182605948                                      |
| 6.621488807                                | 214.2172924                                      | 40.44709898                                     | 0.363908266                                      |
| 6.845775078                                | 473.4532604                                      | 102.1609667                                     | 0.321407316                                      |
| 6.83800927                                 | 258.9938128                                      | 70.57927301                                     | 0.285807668                                      |
| 6.707499178                                | 152.1670762                                      | 44.06633907                                     | 0.263246715                                      |
| 6.39584022                                 | 190.0011351                                      | 53.7014756                                      | 0.247771239                                      |
| 7.06651509                                 | 473.2982539                                      | 98.74138745                                     | 0.306172452                                      |
| 7.151980571                                | 1001.01862                                       | 276.1956919                                     | 0.264646672                                      |
| 6.815180823                                | 427.6957929                                      | 256.7139159                                     | 0.174177793                                      |
| 6.998265409                                | 311.3976565                                      | 221.7901867                                     | 0.148147867                                      |
| 5.992722922                                | 53.28571429                                      | 11.69124424                                     | 0.352431476                                      |
| 6.7901246                                  | 297.1751449                                      | 87.15840309                                     | 0.255780231                                      |
| 6.413330732                                | 102.988477                                       | 18.02030457                                     | 0.321183728                                      |
| 7.003420649                                | 656.0678761                                      | 147.9696591                                     | 0.286923221                                      |
| 6.345710021                                | 117.4529148                                      | 21.07174888                                     | 0.390249751                                      |
| 6.743957568                                | 393.031825                                       | 109.1859771                                     | 0.261752296                                      |
| 6.965710659                                | 588.4013158                                      | 153.475                                         | 0.278345707                                      |
| 6.704285813                                | 276.7289637                                      | 48.81753764                                     | 0.318542151                                      |
| 6.984369651                                | 804.5386997                                      | 334.379644                                      | 0.205736586                                      |
| 7.047921377                                | 903.8037522                                      | 471.5044669                                     | 0.173547134                                      |
| 7.206320368                                | 1088.963181                                      | 717.4230937                                     | 0.167380691                                      |
| 6.688778037                                | 278.4050179                                      | 49.24193548                                     | 0.351857314                                      |
| 6.469636612                                | 268.6902417                                      | 57.58191585                                     | 0.293962112                                      |
| 6.4636745                                  | 167.4590164                                      | 26.4852459                                      | 0.348942623                                      |
| 6.69027695                                 | 385.3730159                                      | 87.89229025                                     | 0.26889086                                       |
| 6.661889743                                | 551.7434996                                      | 170.2241743                                     | 0.244026957                                      |
| 6.471944363                                | 135.8571429                                      | 20.32142857                                     | 0.400708774                                      |
| 6.581721044                                | 306.9045488                                      | 67.54735272                                     | 0.317995297                                      |
| 6.942623069                                | 526.1361032                                      | 150.5573066                                     | 0.249470961                                      |
| 5.459824265                                | 29.89655172                                      | 13.28965517                                     | 0.234358238                                      |
| 6.768235046                                | 616.2214686                                      | 204.0622235                                     | 0.225518031                                      |
| 7.058056288                                | 738.6263696                                      | 400.0321402                                     | 0.165178809                                      |
| 6.591824786                                | 186.940874                                       | 33.97429306                                     | 0.350008737                                      |
| 6.756604584                                | 406.1765464                                      | 65.08376289                                     | 0.364911204                                      |
| 6.030448612                                | 32.97814208                                      | 12.06010929                                     | 0.333717908                                      |
| 5.564072604                                | 22.48571429                                      | 7.20952381                                      | 0.359843915                                      |
| 7.173142442                                | 607.8432704                                      | 234.4022642                                     | 0.227005135                                      |
| 6.482063656                                | 171.9915014                                      | 31.70538244                                     | 0.355686921                                      |
| 6.816751982                                | 143.4403131                                      | 70.77103718                                     | 0.194308297                                      |
| 6.95940486                                 | 663.60489                                        | 262.1618582                                     | 0.204151735                                      |
| 7.068313123                                | 819.3551498                                      | 377.4915605                                     | 0.198446129                                      |
| 6.06563634                                 | 79.29249012                                      | 10.64426877                                     | 0.446551383                                      |
| 6.822046981                                | 236.7944079                                      | 63.17269737                                     | 0.252216693                                      |
| 5.233749745                                | 35.3902439                                       | 8.203252033                                     | 0.34730804                                       |
| 6.266829765                                | 73.27440633                                      | 25.01055409                                     | 0.222922965                                      |
| 6.944491515                                | 144.2242875                                      | 39.34944238                                     | 0.282805027                                      |

| log.sigma.5.0.mm.3D_gldm_DependenceNonUniformityNormalized | log.sigma.5.0.mm.3D_gldm_DependenceVariance | log.sigma.5.0.mm.3D_gldm_LargeDependenceEmphasis |
|------------------------------------------------------------|---------------------------------------------|--------------------------------------------------|
| 0.250002006                                                | 1.83284514                                  | 8.218130312                                      |
| 0.136719682                                                | 8.246322088                                 | 25.55464612                                      |
| 0.212629276                                                | 2.667862983                                 | 11.77880184                                      |
| 0.194665879                                                | 3.041146441                                 | 12.49297913                                      |
| 0.241703587                                                | 1.375579023                                 | 8.158774373                                      |
| 0.237260218                                                | 1.617137785                                 | 9.690513219                                      |
| 0.14404459                                                 | 4.285852653                                 | 19.93175074                                      |
| 0.260379441                                                | 1.275337548                                 | 6.936127745                                      |
| 0.207745241                                                | 2.257866232                                 | 10.44588745                                      |
| 0.168530604                                                | 4.550093544                                 | 16.73014848                                      |
| 0.238037867                                                | 1.400888104                                 | 8.888754534                                      |
| 0.198551762                                                | 2.58510493                                  | 12.37921727                                      |
| 0.18353049                                                 | 2.925367943                                 | 14.66441659                                      |
| 0.223716002                                                | 1.727119409                                 | 9.817531306                                      |
| 0.201593887                                                | 2.054070207                                 | 10.88364435                                      |
| 0.076487964                                                | 22.47862211                                 | 67.9687635                                       |
| 0.242103924                                                | 1.594773442                                 | 8.498567335                                      |
| 0.206898429                                                | 3.194259008                                 | 12.07118353                                      |
| 0.220202879                                                | 2.02251981                                  | 9.467353952                                      |
| 0.148472373                                                | 7.425557838                                 | 24.4673331                                       |
| 0.128872896                                                | 9.542111418                                 | 31.06929556                                      |
| 0.192912385                                                | 2.524222553                                 | 12.41744186                                      |
| 0.182564105                                                | 2.95954996                                  | 13.88026364                                      |
| 0.191462693                                                | 2.623268399                                 | 11.74844075                                      |
| 0.158861381                                                | 3.533848964                                 | 16.08803987                                      |
| 0.229658913                                                | 1.642709432                                 | 8.250720461                                      |
| 0.101114145                                                | 20.60737878                                 | 53.5389498                                       |
| 0.191117167                                                | 2.66918206                                  | 13.01395673                                      |
| 0.243063342                                                | 1.432867289                                 | 7.930311615                                      |
| 0.133107306                                                | 10.76754273                                 | 29.56805665                                      |
| 0.168182872                                                | 3.55663944                                  | 15.6234665                                       |
| 0.157358275                                                | 7.282461204                                 | 22.03946037                                      |
| 0.21054301                                                 | 2.499536303                                 | 11.41121495                                      |
| 0.235946746                                                | 1.518860947                                 | 7.673076923                                      |
| 0.221966178                                                | 1.598417767                                 | 9.078313253                                      |
| 0.219116263                                                | 2.131394961                                 | 10.13861386                                      |
| 0.184284095                                                | 3.005011092                                 | 12.97569444                                      |
| 0.156781443                                                | 5.088535161                                 | 20.19499106                                      |
| 0.1605694                                                  | 5.598402237                                 | 19.62275449                                      |
| 0.20359578                                                 | 3.15351949                                  | 11.52430887                                      |
| 0.152829966                                                | 6.119239132                                 | 20.95793758                                      |
| 0.249833463                                                | 1.32403885                                  | 7.682056663                                      |
| 0.241056553                                                | 1.502508008                                 | 8.462850183                                      |
| 0.248064723                                                | 1.330613682                                 | 7.485853659                                      |
| 0.180814566                                                | 3.283170073                                 | 14.03514377                                      |
| 0.125219582                                                | 7.707986972                                 | 26.96858169                                      |
| 0.166951851                                                | 3.867845253                                 | 16.34036568                                      |
| 0.248319304                                                | 1.40789493                                  | 7.861063465                                      |
| 0.246602807                                                | 1.263533081                                 | 7.701492537                                      |
| 0.245533564                                                | 1.360436259                                 | 7.535211268                                      |
| 0.165895186                                                | 7.301400504                                 | 21.37266355                                      |
| 0.25772412                                                 | 1.256919943                                 | 7.311970979                                      |
| 0.186633791                                                | 5.013449483                                 | 15.99293379                                      |
| 0.20813328                                                 | 2.087253529                                 | 11.25042301                                      |
| 0.112461715                                                | 11.02020626                                 | 34.19668864                                      |
| 0.24370568                                                 | 1.646265212                                 | 7.757679181                                      |
| 0.21589296                                                 | 2.107862163                                 | 9.52621979                                       |
| 0.200304573                                                | 2.638993115                                 | 11.41763341                                      |
| 0.18693744                                                 | 3.056160919                                 | 12.97788698                                      |
| 0.215665307                                                | 2.000600391                                 | 10.75709421                                      |
| 0.223395251                                                | 1.925931386                                 | 9.348277489                                      |
| 0.182734323                                                | 4.092103553                                 | 14.57466229                                      |
| 0.138412878                                                | 7.67885129                                  | 25.92750809                                      |
| 0.114023309                                                | 11.73989621                                 | 37.03368729                                      |
| 0.245556287                                                | 1.437745546                                 | 7.516129032                                      |
| 0.191355534                                                | 2.775402198                                 | 12.50032196                                      |
| 0.261395553                                                | 1.188925249                                 | 7.375634518                                      |
| 0.205213599                                                | 3.950852031                                 | 13.06380982                                      |
| 0.263347343                                                | 1.205694866                                 | 6.497757848                                      |
| 0.195440987                                                | 2.287202089                                 | 11.49726504                                      |
| 0.193553064                                                | 3.78288608                                  | 13.46644737                                      |
| 0.2451098                                                  | 1.469968407                                 | 8.045172719                                      |
| 0.155676993                                                | 5.491735879                                 | 19.88119195                                      |
| 0.13457471                                                 | 8.121345787                                 | 26.98094104                                      |
| 0.11862344                                                 | 9.946212995                                 | 32.27647059                                      |
| 0.249466862                                                | 1.497944528                                 | 7.578853047                                      |
| 0.240546322                                                | 1.70731809                                  | 8.915846016                                      |
| 0.274522978                                                | 1.011351787                                 | 6.537704918                                      |
| 0.218465428                                                | 2.109139196                                 | 10.40249433                                      |
| 0.193866303                                                | 2.420578697                                 | 12.19114547                                      |
| 0.269557823                                                | 1.171563996                                 | 6.26984127                                       |
| 0.228862453                                                | 1.689923877                                 | 8.670395227                                      |
| 0.188444163                                                | 3.164538366                                 | 13.33954155                                      |
| 0.206183115                                                | 1.774554102                                 | 11.19310345                                      |
| 0.181722639                                                | 2.990916594                                 | 14.01503981                                      |
| 0.13488429                                                 | 7.45495371                                  | 26.44010226                                      |
| 0.2402839                                                  | 1.458184918                                 | 7.676092545                                      |
| 0.261711692                                                | 1.28140444                                  | 6.909793814                                      |
| 0.180208427                                                | 4.132401684                                 | 13.73224044                                      |
| 0.21414966                                                 | 1.816780045                                 | 8.676190476                                      |
| 0.152916546                                                | 8.497546774                                 | 23.71245283                                      |
| 0.243614025                                                | 1.561163319                                 | 7.705382436                                      |
| 0.140352557                                                | 6.319556834                                 | 23.17612524                                      |
| 0.162250584                                                | 4.933814121                                 | 18.62200489                                      |
| 0.141122141                                                | 8.770720989                                 | 26.20702721                                      |
| 0.313409052                                                | 0.777890609                                 | 4.889328063                                      |
| 0.194732243                                                | 2.726343382                                 | 12.39967105                                      |
| 0.28772556                                                 | 0.93198493                                  | 6.300813008                                      |
| 0.193336164                                                | 2.943825231                                 | 13.83905013                                      |
| 0.178716589                                                | 5.746355081                                 | 16.71747212                                      |



| log.sigma.5.0.mm.3D_gldm_LargeDependenceLowGrayLevelEmphasis | log.sigma.5.0.mm.3D_gldm_SmallDependenceHighGrayLevelEmphasis | log.sigma.5.0.mm.3D_gldm_LargeDependenceHighGrayLevelEmphasis |
|--------------------------------------------------------------|---------------------------------------------------------------|---------------------------------------------------------------|
| 0.105154401                                                  | 121.3293814                                                   | 2098.627479                                                   |
| 0.216155918                                                  | 54.46924581                                                   | 4651.119403                                                   |
| 0.178234755                                                  | 48.49836195                                                   | 1485.14977                                                    |
| 0.050856806                                                  | 98.81363605                                                   | 4341.486528                                                   |
| 0.063963121                                                  | 124.8860469                                                   | 3132.941504                                                   |
| 0.124018266                                                  | 54.26305064                                                   | 1884.751166                                                   |
| 1.09100876                                                   | 21.24833805                                                   | 1287.827893                                                   |
| 0.075492314                                                  | 136.3722332                                                   | 2111.808383                                                   |
| 0.05311382                                                   | 138.7925446                                                   | 3758.782588                                                   |
| 0.200626955                                                  | 57.75269784                                                   | 2432.41898                                                    |
| 0.083530652                                                  | 66.97093894                                                   | 2183.568319                                                   |
| 0.203178686                                                  | 54.4541625                                                    | 2058.560729                                                   |
| 0.361605513                                                  | 35.1752707                                                    | 2279.109932                                                   |
| 0.0630194                                                    | 78.12574107                                                   | 2947.52415                                                    |
| 0.08685609                                                   | 76.11172545                                                   | 2446.801317                                                   |
| 0.301019537                                                  | 36.53627816                                                   | 16414.67669                                                   |
| 0.278304362                                                  | 95.64743483                                                   | 2047.753582                                                   |
| 0.216468274                                                  | 81.34022917                                                   | 1908.34434                                                    |
| 0.062385732                                                  | 140.5805054                                                   | 4218.032646                                                   |
| 0.385235887                                                  | 29.51305882                                                   | 2713.046055                                                   |
| 0.231276163                                                  | 36.02406873                                                   | 5203.795942                                                   |
| 0.168566462                                                  | 58.0808317                                                    | 2193.381977                                                   |
| 0.096323829                                                  | 69.01627031                                                   | 2900.342365                                                   |
| 0.207545971                                                  | 63.73943063                                                   | 3071.363825                                                   |
| 0.44646809                                                   | 30.57020354                                                   | 1366.429402                                                   |
| 0.116598282                                                  | 101.5117707                                                   | 1530.618156                                                   |
| 0.408601374                                                  | 31.55852604                                                   | 8575.308425                                                   |
| 0.349542924                                                  | 45.10276567                                                   | 1476.043266                                                   |
| 0.06154021                                                   | 91.34119376                                                   | 2295.027762                                                   |
| 0.255306839                                                  | 54.07279029                                                   | 6482.147128                                                   |
| 0.257248035                                                  | 45.04216102                                                   | 1740.73671                                                    |
| 0.147084075                                                  | 65.93679433                                                   | 4672.422597                                                   |
| 0.085076132                                                  | 80.78173519                                                   | 3136.269552                                                   |
| 0.37772527                                                   | 53.165211                                                     | 835.0096154                                                   |
| 0.07457397                                                   | 85.05338437                                                   | 2414.325301                                                   |
| 0.084494819                                                  | 75.84637959                                                   | 2710.243069                                                   |
| 0.232291393                                                  | 60.65520068                                                   | 1755.050694                                                   |
| 0.259576403                                                  | 32.00492788                                                   | 3412.812761                                                   |
| 0.077944754                                                  | 68.74627019                                                   | 7017.656287                                                   |
| 0.144383409                                                  | 90.47770496                                                   | 2413.322212                                                   |
| 0.117767303                                                  | 61.86518972                                                   | 4811.911805                                                   |
| 0.079386827                                                  | 109.1504152                                                   | 2607.390346                                                   |
| 0.075169056                                                  | 81.26439757                                                   | 2270.416565                                                   |
| 0.163902529                                                  | 117.0621713                                                   | 2224.844878                                                   |
| 0.135964161                                                  | 61.06445595                                                   | 2850.123003                                                   |
| 1.26233998                                                   | 22.91859819                                                   | 1255.386445                                                   |
| 0.117749247                                                  | 59.75288506                                                   | 3686.451242                                                   |
| 0.144399309                                                  | 81.6809999                                                    | 1676.180103                                                   |
| 0.181267539                                                  | 56.96035862                                                   | 925.880597                                                    |
| 0.04711778                                                   | 162.9519552                                                   | 3582.386318                                                   |
| 0.212130765                                                  | 50.25558969                                                   | 3470.810164                                                   |
| 0.11820462                                                   | 80.34956637                                                   | 1624.677146                                                   |
| 0.114988681                                                  | 75.88192801                                                   | 3280.751374                                                   |
| 0.14050692                                                   | 53.92870701                                                   | 2135.708968                                                   |
| 0.331222177                                                  | 39.61152478                                                   | 5104.488272                                                   |
| 0.053561114                                                  | 133.423446                                                    | 2337.615472                                                   |
| 0.070302033                                                  | 109.0029829                                                   | 2444.764706                                                   |
| 0.032834073                                                  | 140.8326634                                                   | 5794.135344                                                   |
| 0.195044356                                                  | 67.26656727                                                   | 2070.64742                                                    |
| 0.521815713                                                  | 44.04277061                                                   | 1581.402951                                                   |
| 0.209425882                                                  | 78.76393814                                                   | 1414.361491                                                   |
| 0.110602052                                                  | 79.68029402                                                   | 3619.828952                                                   |
| 0.309842912                                                  | 28.89497354                                                   | 2990.784466                                                   |
| 0.293056939                                                  | 33.51699543                                                   | 5763.185646                                                   |
| 0.131674442                                                  | 81.23961127                                                   | 1319.963134                                                   |
| 0.109366177                                                  | 64.6134542                                                    | 2322.947199                                                   |
| 0.126487927                                                  | 131.6636097                                                   | 2652.659898                                                   |
| 0.162200869                                                  | 81.73451864                                                   | 2725.134814                                                   |
| 0.090101169                                                  | 139.5082268                                                   | 2035.038117                                                   |
| 0.161808911                                                  | 60.57985835                                                   | 1782.530085                                                   |
| 0.181596741                                                  | 73.393808                                                     | 2225.330263                                                   |
| 0.096640799                                                  | 93.34644654                                                   | 2052.092117                                                   |
| 0.264356395                                                  | 42.77843979                                                   | 2620.389319                                                   |
| 0.185636862                                                  | 47.98751128                                                   | 5132.454288                                                   |
| 0.23417471                                                   | 37.50904983                                                   | 5527.686928                                                   |
| 0.063955606                                                  | 145.4079657                                                   | 2800.301971                                                   |
| 0.148072324                                                  | 69.99736086                                                   | 1498.508505                                                   |
| 0.177169455                                                  | 102.4081753                                                   | 1477.613115                                                   |
| 0.337976219                                                  | 54.74622257                                                   | 1356.168367                                                   |
| 0.070516884                                                  | 83.0109214                                                    | 3053.722417                                                   |
| 0.130936715                                                  | 154.3844257                                                   | 1906.531746                                                   |
| 0.08232751                                                   | 82.44744075                                                   | 2238.337808                                                   |
| 0.070289341                                                  | 79.68883461                                                   | 3701.51361                                                    |
| 0.202483598                                                  | 27.02429502                                                   | 1047.593103                                                   |
| 0.218969195                                                  | 43.75370214                                                   | 1822.465939                                                   |
| 0.232320325                                                  | 38.95849037                                                   | 4047.141527                                                   |
| 0.176507792                                                  | 97.77401516                                                   | 1617.94473                                                    |
| 0.018531728                                                  | 226.7959121                                                   | 4264.402706                                                   |
| 0.127690828                                                  | 65.21485417                                                   | 2497.300546                                                   |
| 0.259195367                                                  | 59.52016138                                                   | 759.3047619                                                   |
| 0.088739719                                                  | 92.14963227                                                   | 7674.221635                                                   |
| 0.320211248                                                  | 89.2379822                                                    | 1065.416431                                                   |
| 0.638678674                                                  | 23.84180795                                                   | 2122.453033                                                   |
| 0.206046525                                                  | 40.00911172                                                   | 2929.380196                                                   |
| 0.397932735                                                  | 34.14915362                                                   | 3490.803996                                                   |
| 0.073362793                                                  | 197.4563889                                                   | 2178.094862                                                   |
| 0.097891258                                                  | 70.08235578                                                   | 3165.116776                                                   |
| 0.756865928                                                  | 39.01783198                                                   | 463.0650407                                                   |
| 0.183560217                                                  | 44.55189319                                                   | 2880.522427                                                   |
| 0.268460406                                                  | 93.15175353                                                   | 3385.360595                                                   |

| log.sigma.5.0.mm.3D_gldm_SmallDependenceLowGrayLevelEmphasis | log.sigma.5.0.mm.3D_gldm_LowGrayLevelEmphasis | log.sigma.5.0.mm.3D_gldm_DistanceZoneVariabilityNormalized |
|--------------------------------------------------------------|-----------------------------------------------|------------------------------------------------------------|
| 0.00378231                                                   | 0.011553468                                   | 0.921185964                                                |
| 0.002313107                                                  | 0.010498945                                   | 0.948448862                                                |
| 0.005127521                                                  | 0.01539052                                    | 0.958639159                                                |
| 0.001681302                                                  | 0.004883143                                   | 0.863195755                                                |
| 0.004231441                                                  | 0.009046203                                   | 0.918515165                                                |
| 0.004249015                                                  | 0.013898198                                   | 0.940941534                                                |
| 0.003987276                                                  | 0.045051246                                   | 0.877077562                                                |
| 0.005298018                                                  | 0.011231521                                   | 0.822510498                                                |
| 0.001674835                                                  | 0.005179855                                   | 0.936991986                                                |
| 0.002030556                                                  | 0.010642386                                   | 0.971637079                                                |
| 0.00464601                                                   | 0.011471227                                   | 0.89188217                                                 |
| 0.003129986                                                  | 0.01478489                                    | 0.932057132                                                |
| 0.004729832                                                  | 0.024399699                                   | 0.913579444                                                |
| 0.002686301                                                  | 0.007960169                                   | 0.919497211                                                |
| 0.00298707                                                   | 0.009334232                                   | 0.933190455                                                |
| 0.000809417                                                  | 0.00517186                                    | 0.952150672                                                |
| 0.002835781                                                  | 0.017727038                                   | 0.79204557                                                 |
| 0.003902756                                                  | 0.015963518                                   | 0.960264794                                                |
| 0.002707974                                                  | 0.00942957                                    | 0.876067037                                                |
| 0.002564493                                                  | 0.017350184                                   | 0.973639357                                                |
| 0.001501553                                                  | 0.008242299                                   | 0.93858494                                                 |
| 0.002371076                                                  | 0.012147037                                   | 0.908259544                                                |
| 0.001628648                                                  | 0.006799182                                   | 0.940030187                                                |
| 0.00454414                                                   | 0.019134135                                   | 0.82486685                                                 |
| 0.004261776                                                  | 0.023651167                                   | 0.91708889                                                 |
| 0.003442088                                                  | 0.013394475                                   | 0.920665874                                                |
| 0.001605328                                                  | 0.010275436                                   | 0.916988252                                                |
| 0.003252                                                     | 0.02091835                                    | 0.965527855                                                |
| 0.003668307                                                  | 0.008846465                                   | 0.944335432                                                |
| 0.002145503                                                  | 0.013483575                                   | 0.971569896                                                |
| 0.002297796                                                  | 0.01327156                                    | 0.978184472                                                |
| 0.001410558                                                  | 0.006952435                                   | 0.978424684                                                |
| 0.002182098                                                  | 0.008837998                                   | 0.914932982                                                |
| 0.011943893                                                  | 0.045939117                                   | 0.878071834                                                |
| 0.005713079                                                  | 0.011209656                                   | 0.818656875                                                |
| 0.003612405                                                  | 0.010067004                                   | 0.892100098                                                |
| 0.003009324                                                  | 0.015692172                                   | 0.962110021                                                |
| 0.002703122                                                  | 0.013880283                                   | 0.967124287                                                |
| 0.002990336                                                  | 0.007606329                                   | 0.841900888                                                |
| 0.00378074                                                   | 0.011665196                                   | 0.95568781                                                 |
| 0.002060976                                                  | 0.007032676                                   | 0.929633253                                                |
| 0.002863711                                                  | 0.010325129                                   | 0.883989479                                                |
| 0.003236147                                                  | 0.009218918                                   | 0.93482137                                                 |
| 0.003163366                                                  | 0.014296217                                   | 0.85707201                                                 |
| 0.002578795                                                  | 0.010985247                                   | 0.905                                                      |
| 0.004270023                                                  | 0.036228653                                   | 1                                                          |
| 0.001754172                                                  | 0.007985101                                   | 0.912513034                                                |
| 0.004640177                                                  | 0.016799563                                   | 0.933961575                                                |
| 0.008202148                                                  | 0.031937832                                   | 0.834710744                                                |
| 0.004371763                                                  | 0.008792299                                   | 0.792387543                                                |
| 0.002420995                                                  | 0.011163886                                   | 0.943906476                                                |
| 0.004576909                                                  | 0.014082305                                   | 0.959319885                                                |
| 0.002308205                                                  | 0.008504397                                   | 0.912724143                                                |
| 0.003814192                                                  | 0.015626797                                   | 0.900277008                                                |
| 0.001728938                                                  | 0.011256499                                   | 0.958134348                                                |
| 0.003362881                                                  | 0.008133914                                   | 0.865123967                                                |
| 0.002405347                                                  | 0.007049003                                   | 0.803700561                                                |
| 0.001893486                                                  | 0.004105528                                   | 0.770673668                                                |
| 0.003551223                                                  | 0.013904996                                   | 0.904302626                                                |
| 0.003467503                                                  | 0.022823454                                   | 0.957010023                                                |
| 0.003543083                                                  | 0.017225179                                   | 0.928578571                                                |
| 0.002088914                                                  | 0.008221226                                   | 0.933299832                                                |
| 0.00276617                                                   | 0.013803802                                   | 0.97723879                                                 |
| 0.001338926                                                  | 0.009399579                                   | 0.96036864                                                 |
| 0.008282833                                                  | 0.019787225                                   | 0.959201389                                                |
| 0.00312514                                                   | 0.009698162                                   | 0.942555502                                                |
| 0.002796606                                                  | 0.015544732                                   | 0.798109277                                                |
| 0.002999545                                                  | 0.01286337                                    | 0.958983215                                                |
| 0.007545362                                                  | 0.014323749                                   | 0.876103412                                                |
| 0.003143235                                                  | 0.01358511                                    | 0.929325997                                                |
| 0.002700344                                                  | 0.01254915                                    | 0.91322314                                                 |
| 0.003748257                                                  | 0.012213211                                   | 0.925874507                                                |
| 0.002302487                                                  | 0.013610332                                   | 0.962339849                                                |
| 0.001090621                                                  | 0.006837385                                   | 0.972270508                                                |
| 0.001925834                                                  | 0.00897585                                    | 0.957637277                                                |
| 0.002552985                                                  | 0.008638772                                   | 0.849847712                                                |
| 0.004290352                                                  | 0.014194903                                   | 0.861568025                                                |
| 0.006521329                                                  | 0.023029825                                   | 0.909637707                                                |
| 0.005719297                                                  | 0.028547802                                   | 0.865016265                                                |
| 0.001313244                                                  | 0.005943842                                   | 0.944689859                                                |
| 0.003885299                                                  | 0.016213016                                   | 0.835296671                                                |
| 0.004351536                                                  | 0.010698401                                   | 0.841070901                                                |
| 0.001783394                                                  | 0.005995973                                   | 0.930964166                                                |
| 0.011079209                                                  | 0.026165564                                   | 0.785841761                                                |
| 0.003236257                                                  | 0.014290194                                   | 0.980046373                                                |
| 0.001323277                                                  | 0.008606792                                   | 0.845956913                                                |
| 0.003830142                                                  | 0.017445877                                   | 0.936116296                                                |
| 0.001704856                                                  | 0.003384708                                   | 0.816556079                                                |
| 0.010114952                                                  | 0.017017144                                   | 0.896415838                                                |
| 0.015091897                                                  | 0.033615671                                   | 0.878071834                                                |
| 0.001258263                                                  | 0.004634719                                   | 0.923479363                                                |
| 0.006450071                                                  | 0.027508557                                   | 0.961797942                                                |
| 0.004953569                                                  | 0.031889342                                   | 0.888801653                                                |
| 0.002678532                                                  | 0.012875572                                   | 0.941536961                                                |
| 0.003501142                                                  | 0.018586922                                   | 0.956644092                                                |
| 0.00495155                                                   | 0.015374369                                   | 0.714300502                                                |
| 0.002804495                                                  | 0.01060422                                    | 0.978554799                                                |
| 0.01307094                                                   | 0.080411458                                   | 0.931122449                                                |
| 0.003177664                                                  | 0.01836489                                    | 0.818385879                                                |
| 0.004058211                                                  | 0.018565183                                   | 0.896504875                                                |

| log.sigma.5.0.mm.3D_gldzm_LowIntensityEmphasis | log.sigma.5.0.mm.3D_gldzm_LargeDistanceEmphasis | log.sigma.5.0.mm.3D_gldzm_HighIntensitySmallDistanceEmphasis |
|------------------------------------------------|-------------------------------------------------|--------------------------------------------------------------|
| 0.010761816                                    | 1.123287671                                     | 352.2714041                                                  |
| 0.011256583                                    | 1.079429735                                     | 264.3559063                                                  |
| 0.018371149                                    | 1.063380282                                     | 185.8838028                                                  |
| 0.006145651                                    | 1.221570926                                     | 350.0999414                                                  |
| 0.012759567                                    | 1.127659574                                     | 389.7801418                                                  |
| 0.015865206                                    | 1.091370558                                     | 221.1675127                                                  |
| 0.029490381                                    | 1.197368421                                     | 118.6151316                                                  |
| 0.013469656                                    | 1.295302013                                     | 363.9524609                                                  |
| 0.005675231                                    | 1.097693351                                     | 464.3510855                                                  |
| 0.009236469                                    | 1.043165468                                     | 252.2434053                                                  |
| 0.015815964                                    | 1.172043011                                     | 238.4480287                                                  |
| 0.013886981                                    | 1.105633803                                     | 225.2769953                                                  |
| 0.026310957                                    | 1.135775862                                     | 179.2042026                                                  |
| 0.010004399                                    | 1.12605042                                      | 286.7338936                                                  |
| 0.011255922                                    | 1.103806228                                     | 283.3226644                                                  |
| 0.007114799                                    | 1.073578595                                     | 311.3436455                                                  |
| 0.01222985                                     | 1.353612167                                     | 293.1321293                                                  |
| 0.013362108                                    | 1.060836502                                     | 290.8754753                                                  |
| 0.010711117                                    | 1.199115044                                     | 436.9568584                                                  |
| 0.015445176                                    | 1.040076336                                     | 181.2810115                                                  |
| 0.009831414                                    | 1.095182139                                     | 245.2388367                                                  |
| 0.01114755                                     | 1.144578313                                     | 236.1194779                                                  |
| 0.007300227                                    | 1.092827004                                     | 308.3895921                                                  |
| 0.019140656                                    | 1.290909091                                     | 218.6439394                                                  |
| 0.019853834                                    | 1.13                                            | 137.7975                                                     |
| 0.012182265                                    | 1.124137931                                     | 286.2887931                                                  |
| 0.014157585                                    | 1.130165289                                     | 240.0397727                                                  |
| 0.015162686                                    | 1.052631579                                     | 200.641604                                                   |
| 0.01085821                                     | 1.085959885                                     | 280.60351                                                    |
| 0.012613258                                    | 1.043269231                                     | 259.9939904                                                  |
| 0.010625672                                    | 1.033088235                                     | 206.893076                                                   |
| 0.006523344                                    | 1.032719836                                     | 312.7690866                                                  |
| 0.009323047                                    | 1.13354531                                      | 300.881558                                                   |
| 0.044355263                                    | 1.195652174                                     | 135.5163043                                                  |
| 0.017947554                                    | 1.302521008                                     | 275.7037815                                                  |
| 0.012278765                                    | 1.17167382                                      | 260.0797568                                                  |
| 0.012352413                                    | 1.057954545                                     | 229.4960227                                                  |
| 0.015359471                                    | 1.050151976                                     | 182.1512158                                                  |
| 0.014289222                                    | 1.259615385                                     | 314.7608173                                                  |
| 0.011482192                                    | 1.068010076                                     | 280.4093199                                                  |
| 0.009632798                                    | 1.109550562                                     | 301.3679775                                                  |
| 0.010235997                                    | 1.185483871                                     | 326.6572581                                                  |
| 0.010601029                                    | 1.101180438                                     | 269.4026138                                                  |
| 0.011021632                                    | 1.232394366                                     | 334.1625587                                                  |
| 0.01205159                                     | 1.15                                            | 246.6708333                                                  |
| 0.024771134                                    | 1                                               | 132.1412804                                                  |
| 0.008732508                                    | 1.137535817                                     | 274.1048233                                                  |
| 0.016292149                                    | 1.102564103                                     | 252.1634615                                                  |
| 0.034916639                                    | 1.272727273                                     | 169.4136364                                                  |
| 0.012283562                                    | 1.352941176                                     | 448.7794118                                                  |
| 0.011618338                                    | 1.086642599                                     | 236.4623947                                                  |
| 0.013499343                                    | 1.06231454                                      | 236.4176558                                                  |
| 0.009390135                                    | 1.13718723                                      | 294.9402502                                                  |
| 0.018405856                                    | 1.157894737                                     | 218.0467836                                                  |
| 0.009858407                                    | 1.064171123                                     | 224.7610772                                                  |
| 0.009227573                                    | 1.218181818                                     | 349.8831169                                                  |
| 0.007399119                                    | 1.330960854                                     | 324.9854686                                                  |
| 0.006219746                                    | 1.396355353                                     | 463.6634396                                                  |
| 0.013175546                                    | 1.151162791                                     | 259.3217054                                                  |
| 0.017055504                                    | 1.065934066                                     | 180.3177656                                                  |
| 0.01277282                                     | 1.111258278                                     | 263.8357616                                                  |
| 0.00827772                                     | 1.103629977                                     | 298.0395199                                                  |
| 0.015909763                                    | 1.034539474                                     | 170.7561678                                                  |
| 0.010108462                                    | 1.060674157                                     | 240.1820225                                                  |
| 0.023117943                                    | 1.0625                                          | 224.9895833                                                  |
| 0.011764651                                    | 1.088794926                                     | 253.5480973                                                  |
| 0.013725115                                    | 1.341772152                                     | 381.4240506                                                  |
| 0.010949123                                    | 1.06284153                                      | 286.3909381                                                  |
| 0.017570256                                    | 1.199052133                                     | 343.457346                                                   |
| 0.012826878                                    | 1.110047847                                     | 230.8452951                                                  |
| 0.010674086                                    | 1.136363636                                     | 260.4393133                                                  |
| 0.01267556                                     | 1.115646259                                     | 293.2165533                                                  |
| 0.011257283                                    | 1.057595993                                     | 216.1202003                                                  |
| 0.006103445                                    | 1.0421875                                       | 289.5693359                                                  |
| 0.011586005                                    | 1.064950263                                     | 231.4704506                                                  |
| 0.008513034                                    | 1.245283019                                     | 391.1357442                                                  |
| 0.014287254                                    | 1.224438903                                     | 229.7911471                                                  |
| 0.018045774                                    | 1.14229249                                      | 288.3063241                                                  |
| 0.025793204                                    | 1.218370884                                     | 199.1256499                                                  |
| 0.006069845                                    | 1.08539604                                      | 341.990099                                                   |
| 0.012908067                                    | 1.271653543                                     | 368.5954724                                                  |
| 0.013009208                                    | 1.261121857                                     | 248.016441                                                   |
| 0.007051912                                    | 1.107398568                                     | 314.2168854                                                  |
| 0.045555829                                    | 1.365853659                                     | 116.5304878                                                  |
| 0.014114344                                    | 1.030235162                                     | 200.0103583                                                  |
| 0.008582656                                    | 1.252279635                                     | 235.4571935                                                  |
| 0.013053082                                    | 1.099099099                                     | 277.8611111                                                  |
| 0.004350855                                    | 1.30647482                                      | 590.0082734                                                  |
| 0.02784249                                     | 1.164383562                                     | 186.359589                                                   |
| 0.041149338                                    | 1.195652174                                     | 153.6195652                                                  |
| 0.00539899                                     | 1.119544592                                     | 400.4656072                                                  |
| 0.018055733                                    | 1.058441558                                     | 250.3449675                                                  |
| 0.030917549                                    | 1.177272727                                     | 123.4556818                                                  |
| 0.014020154                                    | 1.090419806                                     | 201.3148547                                                  |
| 0.018959302                                    | 1.066508314                                     | 178.3240301                                                  |
| 0.01437945                                     | 1.517985612                                     | 409.7589928                                                  |
| 0.012186204                                    | 1.032520325                                     | 282.4457995                                                  |
| 0.040464837                                    | 1.107142857                                     | 108.6830357                                                  |
| 0.022500662                                    | 1.303030303                                     | 193.2929293                                                  |
| 0.015364911                                    | 1.164233577                                     | 314.8987226                                                  |

| log.sigma.5.0.mm.3D_gldzm_LowIntensityLargeDistanceEmphasis | log.sigma.5.0.mm.3D_gldzm_HighIntensityEmphasis | log.sigma.5.0.mm.3D_gldzm_DistanceZoneVariability | log.sigma.5.0.mm.3D_gldzm_ZonePercentage |
|-------------------------------------------------------------|-------------------------------------------------|---------------------------------------------------|------------------------------------------|
| 0.011747253                                                 | 358.4486301                                     | 268.9863014                                       | 0.413597734                              |
| 0.011852085                                                 | 267.6232179                                     | 465.688391                                        | 0.236398652                              |
| 0.018953288                                                 | 187.7112676                                     | 136.1267606                                       | 0.32718894                               |
| 0.006969749                                                 | 367.2708089                                     | 736.3059789                                       | 0.323719165                              |
| 0.013277908                                                 | 399.4397163                                     | 129.5106383                                       | 0.39275766                               |
| 0.0167401                                                   | 224.0304569                                     | 185.3654822                                       | 0.306376361                              |
| 0.080742535                                                 | 121.0131579                                     | 66.65789474                                       | 0.225519288                              |
| 0.015243085                                                 | 379.1319911                                     | 367.6621924                                       | 0.446107784                              |
| 0.00607026                                                  | 471.5671642                                     | 690.5630936                                       | 0.354497354                              |
| 0.010007286                                                 | 253.5131894                                     | 810.3453237                                       | 0.269205939                              |
| 0.016821461                                                 | 246.4265233                                     | 248.8351254                                       | 0.337363966                              |
| 0.015595112                                                 | 230.0657277                                     | 397.056338                                        | 0.287449393                              |
| 0.027741014                                                 | 184.4849138                                     | 423.9008621                                       | 0.223722276                              |
| 0.010756772                                                 | 293.5658263                                     | 328.2605042                                       | 0.319320215                              |
| 0.011823086                                                 | 288.8685121                                     | 269.6920415                                       | 0.317233809                              |
| 0.007457923                                                 | 316.090301                                      | 854.0791527                                       | 0.129120484                              |
| 0.014845309                                                 | 309.1673004                                     | 208.3079848                                       | 0.376790831                              |
| 0.014005556                                                 | 292.5931559                                     | 757.6489227                                       | 0.338336192                              |
| 0.011623943                                                 | 450.8849558                                     | 197.9911504                                       | 0.388316151                              |
| 0.015949322                                                 | 182.3301527                                     | 510.1870229                                       | 0.187076044                              |
| 0.010557225                                                 | 249.2056404                                     | 798.7132785                                       | 0.162901991                              |
| 0.012196148                                                 | 245.1706827                                     | 452.313253                                        | 0.289534884                              |
| 0.008391313                                                 | 312.5710267                                     | 668.3614627                                       | 0.260344196                              |
| 0.04574347                                                  | 227.0848485                                     | 136.1030303                                       | 0.343035343                              |
| 0.021860255                                                 | 140.75                                          | 275.1266667                                       | 0.249169435                              |
| 0.013150054                                                 | 291.0034483                                     | 266.9931034                                       | 0.417867435                              |
| 0.015067146                                                 | 246.7541322                                     | 443.822314                                        | 0.139642239                              |
| 0.015694099                                                 | 202.1829574                                     | 385.245614                                        | 0.278436846                              |
| 0.011471716                                                 | 284.4040115                                     | 659.1461318                                       | 0.395467422                              |
| 0.012913867                                                 | 261.8365385                                     | 606.2596154                                       | 0.245476003                              |
| 0.010874879                                                 | 208.1568627                                     | 798.1985294                                       | 0.256684492                              |
| 0.006704502                                                 | 314.9107021                                     | 1435.349012                                       | 0.247386172                              |
| 0.010020514                                                 | 308.5151033                                     | 575.4928458                                       | 0.309394983                              |
| 0.118149998                                                 | 136.4782609                                     | 40.39130435                                       | 0.442307692                              |
| 0.021437395                                                 | 285.8067227                                     | 97.42016807                                       | 0.358433735                              |
| 0.013105181                                                 | 269.9456366                                     | 623.5779685                                       | 0.346039604                              |
| 0.012822122                                                 | 232.1431818                                     | 846.6568182                                       | 0.305555556                              |
| 0.015817196                                                 | 183.9133739                                     | 636.3677812                                       | 0.196183661                              |
| 0.016359745                                                 | 325.5096154                                     | 175.1153846                                       | 0.249101796                              |
| 0.012179022                                                 | 282.4382872                                     | 379.4080605                                       | 0.378455672                              |
| 0.01011423                                                  | 309.1629213                                     | 330.9494382                                       | 0.241519674                              |
| 0.011369399                                                 | 337.4032258                                     | 328.844086                                        | 0.390346275                              |
| 0.011371288                                                 | 273.2765599                                     | 554.3490725                                       | 0.361144945                              |
| 0.013878624                                                 | 343.0446009                                     | 365.1126761                                       | 0.415609756                              |
| 0.013054426                                                 | 254.1555556                                     | 488.7                                             | 0.287539936                              |
| 0.024771134                                                 | 132.1412804                                     | 453                                               | 0.203321364                              |
| 0.009444983                                                 | 282.2932187                                     | 955.4011461                                       | 0.245428973                              |
| 0.017251908                                                 | 255.3076923                                     | 218.5470085                                       | 0.401372213                              |
| 0.109802539                                                 | 170.7090909                                     | 45.90909091                                       | 0.410447761                              |
| 0.013700653                                                 | 475.9411765                                     | 161.6470588                                       | 0.410462777                              |
| 0.012480415                                                 | 239.5824308                                     | 784.3862816                                       | 0.242698598                              |
| 0.014036324                                                 | 238.4540059                                     | 323.2908012                                       | 0.407496977                              |
| 0.010374559                                                 | 301.8093184                                     | 1057.847282                                       | 0.303323737                              |
| 0.02061027                                                  | 222.7134503                                     | 153.9473684                                       | 0.289340102                              |
| 0.01036062                                                  | 227.2964095                                     | 1254.197861                                       | 0.200674536                              |
| 0.010379061                                                 | 362.5220779                                     | 333.0727273                                       | 0.437997725                              |
| 0.010639948                                                 | 338.059312                                      | 677.519573                                        | 0.384404925                              |
| 0.007797148                                                 | 493.4123007                                     | 338.3257403                                       | 0.339520495                              |
| 0.015034632                                                 | 264.0542636                                     | 233.3100775                                       | 0.316953317                              |
| 0.018727066                                                 | 181.7326007                                     | 261.2637363                                       | 0.309875142                              |
| 0.014146368                                                 | 267.6304636                                     | 701.0768212                                       | 0.356300142                              |
| 0.008739783                                                 | 305.691452                                      | 1594.076112                                       | 0.311792625                              |
| 0.016205556                                                 | 171.9638158                                     | 594.1611842                                       | 0.196763754                              |
| 0.010478505                                                 | 242.8314607                                     | 427.3640449                                       | 0.162943977                              |
| 0.023918724                                                 | 226.2708333                                     | 92.08333333                                       | 0.442396313                              |
| 0.012261511                                                 | 258.8520085                                     | 445.8287526                                       | 0.304571797                              |
| 0.016596461                                                 | 395.4746835                                     | 126.1012658                                       | 0.401015228                              |
| 0.011443169                                                 | 288.9489982                                     | 1052.96357                                        | 0.343446982                              |
| 0.018932308                                                 | 351.7677725                                     | 184.8578199                                       | 0.47309417                               |
| 0.01387711                                                  | 234.8835726                                     | 582.6874003                                       | 0.311785182                              |
| 0.01194395                                                  | 265.9235977                                     | 944.2727273                                       | 0.340131579                              |
| 0.013609236                                                 | 297.8866213                                     | 408.3106576                                       | 0.39061116                               |
| 0.011684371                                                 | 218.4015025                                     | 1152.883139                                       | 0.231811146                              |
| 0.006445019                                                 | 291.2328125                                     | 1244.50625                                        | 0.190589637                              |
| 0.011904267                                                 | 235.6606202                                     | 1636.602106                                       | 0.186165577                              |
| 0.009822767                                                 | 405.3102725                                     | 405.3773585                                       | 0.427419355                              |
| 0.01717241                                                  | 236.2418953                                     | 345.4887781                                       | 0.358997314                              |
| 0.019076668                                                 | 294.916996                                      | 230.1383399                                       | 0.414754098                              |
| 0.044221865                                                 | 203.745234                                      | 499.1143847                                       | 0.327097506                              |
| 0.006496073                                                 | 347.4740099                                     | 763.3094059                                       | 0.283907238                              |
| 0.014598953                                                 | 382.7716535                                     | 212.1653543                                       | 0.503968254                              |
| 0.016667633                                                 | 258.7079304                                     | 434.8336557                                       | 0.385533184                              |
| 0.007401374                                                 | 323.3699284                                     | 780.1479714                                       | 0.300143266                              |
| 0.152649325                                                 | 117.5365854                                     | 32.2195122                                        | 0.282758621                              |
| 0.01446342                                                  | 200.8174692                                     | 875.181411                                        | 0.263344146                              |
| 0.009844713                                                 | 252.0202634                                     | 834.9594732                                       | 0.180241052                              |
| 0.01387288                                                  | 283.1651652                                     | 311.7267267                                       | 0.428020566                              |
| 0.005242887                                                 | 620.9568345                                     | 567.5064748                                       | 0.447809278                              |
| 0.028855444                                                 | 193.7260274                                     | 65.43835616                                       | 0.398907104                              |
| 0.109627599                                                 | 155.673913                                      | 40.39130435                                       | 0.438095238                              |
| 0.005868395                                                 | 410.5009488                                     | 973.3472486                                       | 0.265157233                              |
| 0.019523536                                                 | 251.3506494                                     | 296.2337662                                       | 0.436260623                              |
| 0.032975805                                                 | 127.8227273                                     | 195.5363636                                       | 0.215264188                              |
| 0.015200349                                                 | 203.9354144                                     | 874.6878364                                       | 0.227139364                              |
| 0.019592864                                                 | 180.6191607                                     | 1208.241489                                       | 0.217533586                              |
| 0.019170315                                                 | 440.8920863                                     | 99.28776978                                       | 0.549407115                              |
| 0.012295097                                                 | 285.3360434                                     | 361.0867209                                       | 0.303453947                              |
| 0.049765432                                                 | 109.0178571                                     | 52.14285714                                       | 0.455284553                              |
| 0.029095913                                                 | 200.7171717                                     | 81.02020202                                       | 0.26121372                               |
| 0.016946796                                                 | 321.1094891                                     | 245.6423358                                       | 0.33952912                               |

| log.sigma.5.0.mm.3D_gldzm_IntensityVariabilityNormalized | log.sigma.5.0.mm.3D_gldzm_LowIntensitySmallDistanceEmphasis | log.sigma.5.0.mm.3D_gldzm_IntensityVariability |
|----------------------------------------------------------|-------------------------------------------------------------|------------------------------------------------|
| 0.040603303                                              | 0.010515457                                                 | 11.85616438                                    |
| 0.050816945                                              | 0.011107707                                                 | 24.95112016                                    |
| 0.061198175                                              | 0.018225614                                                 | 8.690140845                                    |
| 0.045451609                                              | 0.005939627                                                 | 38.77022274                                    |
| 0.043005885                                              | 0.012629982                                                 | 6.063829787                                    |
| 0.055064547                                              | 0.015646482                                                 | 10.84771574                                    |
| 0.07998615                                               | 0.016677342                                                 | 6.078947368                                    |
| 0.037480794                                              | 0.013026298                                                 | 16.75391499                                    |
| 0.040692676                                              | 0.005576474                                                 | 29.99050204                                    |
| 0.054894214                                              | 0.009043765                                                 | 45.78177458                                    |
| 0.04952403                                               | 0.01556459                                                  | 13.8172043                                     |
| 0.049053318                                              | 0.013459949                                                 | 20.89671362                                    |
| 0.050692999                                              | 0.025953442                                                 | 23.52155172                                    |
| 0.051275412                                              | 0.009816306                                                 | 18.30532213                                    |
| 0.048981693                                              | 0.011114131                                                 | 14.15570934                                    |
| 0.0518724                                                | 0.007029018                                                 | 46.52954292                                    |
| 0.050383842                                              | 0.011575986                                                 | 13.25095057                                    |
| 0.044475608                                              | 0.013201246                                                 | 35.09125475                                    |
| 0.044717676                                              | 0.010482911                                                 | 10.10619469                                    |
| 0.057120797                                              | 0.01531914                                                  | 29.93129771                                    |
| 0.064447577                                              | 0.009649962                                                 | 54.84488837                                    |
| 0.053757197                                              | 0.0108854                                                   | 26.77108434                                    |
| 0.054227223                                              | 0.007027455                                                 | 38.55555556                                    |
| 0.051092746                                              | 0.012489953                                                 | 8.43030303                                     |
| 0.067333333                                              | 0.019352228                                                 | 20.2                                           |
| 0.045755054                                              | 0.011940318                                                 | 13.26896552                                    |
| 0.054717915                                              | 0.013930195                                                 | 26.48347107                                    |
| 0.057015974                                              | 0.015029833                                                 | 22.74937343                                    |
| 0.047700758                                              | 0.010704834                                                 | 33.29512894                                    |
| 0.050213675                                              | 0.012538106                                                 | 31.33333333                                    |
| 0.061403667                                              | 0.010563371                                                 | 50.10539216                                    |
| 0.050305076                                              | 0.006478055                                                 | 73.79754601                                    |
| 0.044330593                                              | 0.00914868                                                  | 27.88394277                                    |
| 0.061436673                                              | 0.025906579                                                 | 2.826086957                                    |
| 0.048795989                                              | 0.017075093                                                 | 5.806722689                                    |
| 0.046465316                                              | 0.012072161                                                 | 32.47925608                                    |
| 0.049000517                                              | 0.012234985                                                 | 43.12045455                                    |
| 0.058591476                                              | 0.01524504                                                  | 38.55319149                                    |
| 0.049879808                                              | 0.013771592                                                 | 10.375                                         |
| 0.04553674                                               | 0.011307985                                                 | 18.07808564                                    |
| 0.052281909                                              | 0.00951244                                                  | 18.61235955                                    |
| 0.042548271                                              | 0.009952646                                                 | 15.82795699                                    |
| 0.048790129                                              | 0.010408465                                                 | 28.93254637                                    |
| 0.040611431                                              | 0.010307383                                                 | 17.30046948                                    |
| 0.046268861                                              | 0.01180088                                                  | 24.98518519                                    |
| 0.065138469                                              | 0.024771134                                                 | 29.50772627                                    |
| 0.048460649                                              | 0.008554389                                                 | 50.7382999                                     |
| 0.050807217                                              | 0.016052209                                                 | 11.88888889                                    |
| 0.06446281                                               | 0.016195164                                                 | 3.545454545                                    |
| 0.039023453                                              | 0.011929289                                                 | 7.960784314                                    |
| 0.052257512                                              | 0.011402819                                                 | 43.42599278                                    |
| 0.052769682                                              | 0.013365097                                                 | 17.78338279                                    |
| 0.045367276                                              | 0.009144029                                                 | 52.58067299                                    |
| 0.051810814                                              | 0.017854752                                                 | 8.859649123                                    |
| 0.053881543                                              | 0.009732854                                                 | 70.53093965                                    |
| 0.04310339                                               | 0.008939701                                                 | 16.59480519                                    |
| 0.045787724                                              | 0.006588912                                                 | 38.59905101                                    |
| 0.042709409                                              | 0.005825396                                                 | 18.74943052                                    |
| 0.052220419                                              | 0.012710775                                                 | 13.47286822                                    |
| 0.060070577                                              | 0.016637614                                                 | 16.3992674                                     |
| 0.046989167                                              | 0.012429434                                                 | 35.47682119                                    |
| 0.046771907                                              | 0.008162204                                                 | 79.88641686                                    |
| 0.05808518                                               | 0.015835815                                                 | 35.31578947                                    |
| 0.05674536                                               | 0.010015951                                                 | 25.25168539                                    |
| 0.052517361                                              | 0.022917747                                                 | 5.041666667                                    |
| 0.047106097                                              | 0.011640436                                                 | 22.28118393                                    |
| 0.041419644                                              | 0.013007279                                                 | 6.544303797                                    |
| 0.043533366                                              | 0.010825611                                                 | 47.7996357                                     |
| 0.041755576                                              | 0.017229743                                                 | 8.81042654                                     |
| 0.049741942                                              | 0.01256432                                                  | 31.18819777                                    |
| 0.047321439                                              | 0.01035662                                                  | 48.9303675                                     |
| 0.043608373                                              | 0.012442141                                                 | 19.23129252                                    |
| 0.05382092                                               | 0.011150511                                                 | 64.47746244                                    |
| 0.061185303                                              | 0.006018051                                                 | 78.3171875                                     |
| 0.047867946                                              | 0.011506439                                                 | 81.80631949                                    |
| 0.040764034                                              | 0.008185601                                                 | 19.44444444                                    |
| 0.051013364                                              | 0.013565965                                                 | 20.4563591                                     |
| 0.043915699                                              | 0.017788051                                                 | 11.11067194                                    |
| 0.050031688                                              | 0.021186039                                                 | 28.86828423                                    |
| 0.056979708                                              | 0.005963288                                                 | 46.03960396                                    |
| 0.039432079                                              | 0.012485345                                                 | 10.01574803                                    |
| 0.050533318                                              | 0.012094602                                                 | 26.12572534                                    |
| 0.04610933                                               | 0.006964547                                                 | 38.63961814                                    |
| 0.077929804                                              | 0.018782455                                                 | 3.195121951                                    |
| 0.0552098                                                | 0.014027075                                                 | 49.30235162                                    |
| 0.055241955                                              | 0.008267142                                                 | 54.52380952                                    |
| 0.044053062                                              | 0.012848132                                                 | 14.66966967                                    |
| 0.039722582                                              | 0.004127847                                                 | 27.60719424                                    |
| 0.059485832                                              | 0.027589252                                                 | 4.342465753                                    |
| 0.061436673                                              | 0.024029773                                                 | 2.826086957                                    |
| 0.044624436                                              | 0.005281639                                                 | 47.0341556                                     |
| 0.04579187                                               | 0.017688782                                                 | 14.1038961                                     |
| 0.066983471                                              | 0.030402985                                                 | 14.73636364                                    |
| 0.052927961                                              | 0.013725106                                                 | 49.17007535                                    |
| 0.055090715                                              | 0.018800912                                                 | 69.57957245                                    |
| 0.037937995                                              | 0.013181734                                                 | 5.273381295                                    |
| 0.043646859                                              | 0.01215898                                                  | 16.10569106                                    |
| 0.073979592                                              | 0.038139688                                                 | 4.142857143                                    |
| 0.064381186                                              | 0.020851849                                                 | 6.373737374                                    |
| 0.042330438                                              | 0.01496944                                                  | 11.59854015                                    |

| log.sigma.5.0.mm.3D_gldzm_HighIntensityLargeDistanceEmphasis | log.sigma.5.0.mm.3D_gldzm_SmallDistanceEmphasis | log.sigma.5.0.mm.3D_glcm_SumVariance | log.sigma.5.0.mm.3D_glcm_Homogeneity1 |
|--------------------------------------------------------------|-------------------------------------------------|--------------------------------------|---------------------------------------|
| 383.1575342                                                  | 0.969178082                                     | 812.8793538                          | 0.299269376                           |
| 280.6924644                                                  | 0.980142566                                     | 528.0506495                          | 0.414190573                           |
| 195.0211268                                                  | 0.98415493                                      | 372.6145558                          | 0.363769414                           |
| 435.954279                                                   | 0.944607268                                     | 1042.087591                          | 0.342266164                           |
| 438.0780142                                                  | 0.968085106                                     | 1079.090064                          | 0.310299244                           |
| 235.4822335                                                  | 0.97715736                                      | 481.161083                           | 0.33584812                            |
| 130.6052632                                                  | 0.950657895                                     | 172.0732893                          | 0.432297043                           |
| 439.8501119                                                  | 0.926174497                                     | 899.7829932                          | 0.280843306                           |
| 500.431479                                                   | 0.975576662                                     | 1154.266166                          | 0.327251504                           |
| 258.5923261                                                  | 0.989208633                                     | 493.7258272                          | 0.38557197                            |
| 278.3405018                                                  | 0.956989247                                     | 628.2718524                          | 0.314779513                           |
| 249.2206573                                                  | 0.973591549                                     | 502.0292895                          | 0.350823702                           |
| 205.6077586                                                  | 0.966056034                                     | 404.2627231                          | 0.382963362                           |
| 320.8935574                                                  | 0.968487395                                     | 796.2114914                          | 0.339983976                           |
| 311.0519031                                                  | 0.974048443                                     | 677.3958297                          | 0.341783438                           |
| 335.0769231                                                  | 0.981605351                                     | 769.7929051                          | 0.55439812                            |
| 373.3079848                                                  | 0.911596958                                     | 708.6370967                          | 0.308981808                           |
| 299.4638783                                                  | 0.984790875                                     | 585.6747692                          | 0.332939439                           |
| 506.5973451                                                  | 0.950221239                                     | 1198.213067                          | 0.298789594                           |
| 186.5267176                                                  | 0.989980916                                     | 308.0492472                          | 0.431624322                           |
| 265.0728555                                                  | 0.976204465                                     | 495.0612856                          | 0.458581644                           |
| 281.375502                                                   | 0.963855422                                     | 541.0295883                          | 0.354907432                           |
| 329.2967651                                                  | 0.976793249                                     | 690.1554497                          | 0.380080575                           |
| 260.8484848                                                  | 0.927272727                                     | 622.6261026                          | 0.342870344                           |
| 152.56                                                       | 0.9675                                          | 224.9304212                          | 0.408700598                           |
| 309.862069                                                   | 0.968965517                                     | 604.2607564                          | 0.307664705                           |
| 273.6115702                                                  | 0.967458678                                     | 482.4639209                          | 0.497964913                           |
| 208.3483709                                                  | 0.986842105                                     | 356.3601616                          | 0.376839243                           |
| 299.6060172                                                  | 0.978510029                                     | 787.8177164                          | 0.30998459                            |
| 269.2067308                                                  | 0.989182692                                     | 538.9675514                          | 0.421771757                           |
| 213.2120098                                                  | 0.991727941                                     | 360.0825133                          | 0.39494082                            |
| 323.4771643                                                  | 0.991820041                                     | 723.3915803                          | 0.392848428                           |
| 339.0492846                                                  | 0.966613672                                     | 791.7430487                          | 0.337861201                           |
| 140.326087                                                   | 0.951086957                                     | 274.5581401                          | 0.32477898                            |
| 326.2184874                                                  | 0.924369748                                     | 704.5893412                          | 0.330157984                           |
| 309.4091559                                                  | 0.957081545                                     | 702.8804572                          | 0.322679343                           |
| 242.7318182                                                  | 0.985511364                                     | 440.2994239                          | 0.356955759                           |
| 190.9620061                                                  | 0.987462006                                     | 429.9157601                          | 0.416741584                           |
| 368.5048077                                                  | 0.935096154                                     | 934.215729                           | 0.384696459                           |
| 290.5541562                                                  | 0.982997481                                     | 638.1137833                          | 0.332184671                           |
| 340.3426966                                                  | 0.97261236                                      | 706.0040021                          | 0.394919728                           |
| 380.3870968                                                  | 0.953629032                                     | 878.4029243                          | 0.293762835                           |
| 288.772344                                                   | 0.97470489                                      | 706.4674987                          | 0.312132456                           |
| 378.57277                                                    | 0.941901408                                     | 847.3379261                          | 0.298551817                           |
| 284.0944444                                                  | 0.9625                                          | 585.4545004                          | 0.362345651                           |
| 132.1412804                                                  | 1                                               | 156.2858552                          | 0.456405482                           |
| 315.0468004                                                  | 0.965616046                                     | 668.4671322                          | 0.379748535                           |
| 267.8846154                                                  | 0.974358974                                     | 587.6934717                          | 0.306766285                           |
| 175.8909091                                                  | 0.931818182                                     | 301.5328716                          | 0.330170283                           |
| 584.5882353                                                  | 0.911764706                                     | 1285.620247                          | 0.287498761                           |
| 252.0625752                                                  | 0.97833935                                      | 490.9609828                          | 0.396296943                           |
| 246.5994065                                                  | 0.984421365                                     | 555.2048726                          | 0.296658604                           |
| 329.285591                                                   | 0.965703192                                     | 669.4273179                          | 0.353609834                           |
| 241.380117                                                   | 0.960526316                                     | 500.1605914                          | 0.364331738                           |
| 237.4377387                                                  | 0.983957219                                     | 450.1124915                          | 0.464824302                           |
| 413.0779221                                                  | 0.945454545                                     | 873.1522485                          | 0.293116178                           |
| 390.3546856                                                  | 0.917259786                                     | 789.9466003                          | 0.305128347                           |
| 612.4077449                                                  | 0.900911162                                     | 1405.65336                           | 0.323592937                           |
| 282.9844961                                                  | 0.962209302                                     | 515.8878538                          | 0.360803599                           |
| 187.3919414                                                  | 0.983516484                                     | 390.9930144                          | 0.353440258                           |
| 282.8092715                                                  | 0.97218543                                      | 510.2393687                          | 0.31777492                            |
| 336.2991803                                                  | 0.974092506                                     | 769.5813542                          | 0.356458463                           |
| 176.7944079                                                  | 0.991365132                                     | 333.071992                           | 0.445120373                           |
| 253.4292135                                                  | 0.984831461                                     | 446.7779653                          | 0.472995276                           |
| 231.3958333                                                  | 0.984375                                        | 468.4097202                          | 0.305550247                           |
| 280.0676533                                                  | 0.977801268                                     | 596.0910971                          | 0.360262105                           |
| 451.6772152                                                  | 0.914556962                                     | 927.5534943                          | 0.292605948                           |
| 299.1812386                                                  | 0.984289617                                     | 641.1627435                          | 0.333934112                           |
| 385.0094787                                                  | 0.950236967                                     | 844.3183307                          | 0.272395117                           |
| 251.0366826                                                  | 0.972488038                                     | 485.6567573                          | 0.35057943                            |
| 287.860735                                                   | 0.965909091                                     | 570.9119214                          | 0.341418241                           |
| 316.5668934                                                  | 0.971088435                                     | 710.8441413                          | 0.297571406                           |
| 227.5267112                                                  | 0.985601002                                     | 401.39336                            | 0.401735602                           |
| 297.8867188                                                  | 0.989453125                                     | 592.3876248                          | 0.434545371                           |
| 252.4211299                                                  | 0.983762434                                     | 532.2980478                          | 0.453905436                           |
| 462.0083857                                                  | 0.938679245                                     | 985.5359738                          | 0.284138839                           |
| 262.0448878                                                  | 0.943890274                                     | 493.7669095                          | 0.326460464                           |
| 321.3596838                                                  | 0.964426877                                     | 651.0802067                          | 0.281712749                           |
| 222.2235702                                                  | 0.945407279                                     | 385.2573499                          | 0.325244995                           |
| 369.4096535                                                  | 0.97865099                                      | 824.2870453                          | 0.361439003                           |
| 439.476378                                                   | 0.932086614                                     | 861.832951                           | 0.260614515                           |
| 301.4738878                                                  | 0.934719536                                     | 674.2836383                          | 0.318665976                           |
| 359.9821002                                                  | 0.973150358                                     | 863.0291788                          | 0.356866774                           |
| 121.5609756                                                  | 0.908536585                                     | 212.6027565                          | 0.380831225                           |
| 204.0459127                                                  | 0.992441209                                     | 395.285482                           | 0.375519152                           |
| 318.2725431                                                  | 0.936930091                                     | 520.8046378                          | 0.432183915                           |
| 304.3813814                                                  | 0.975225225                                     | 613.9020068                          | 0.295889955                           |
| 744.7510791                                                  | 0.923381295                                     | 1752.704979                          | 0.274256857                           |
| 223.1917808                                                  | 0.95890411                                      | 477.8467344                          | 0.376281903                           |
| 163.8913043                                                  | 0.951086957                                     | 243.5856726                          | 0.344631596                           |
| 450.642315                                                   | 0.970113852                                     | 1014.441415                          | 0.384987328                           |
| 255.3733766                                                  | 0.98538961                                      | 453.0477084                          | 0.297119238                           |
| 145.2909091                                                  | 0.955681818                                     | 223.7397892                          | 0.430215056                           |
| 214.4176534                                                  | 0.977395048                                     | 424.0684476                          | 0.396032106                           |
| 189.7996833                                                  | 0.983372922                                     | 339.3033795                          | 0.423578244                           |
| 565.4244604                                                  | 0.870503597                                     | 1207.816654                          | 0.255940049                           |
| 296.897019                                                   | 0.991869919                                     | 745.0889396                          | 0.350498496                           |
| 110.3571429                                                  | 0.973214286                                     | 169.622023                           | 0.318381268                           |
| 230.4141414                                                  | 0.924242424                                     | 493.7769745                          | 0.383762878                           |
| 345.9525547                                                  | 0.958941606                                     | 609.7595278                          | 0.357149589                           |

| log.sigma.5.0.mm.3D_glcM_Homogeneity2 | log.sigma.5.0.mm.3D_glcM_ClusterShade | log.sigma.5.0.mm.3D_glcM_MaximumProbability | log.sigma.5.0.mm.3D_glcM_Ldmn | log.sigma.5.0.mm.3D_glcM_SumVariance2 |
|---------------------------------------|---------------------------------------|---------------------------------------------|-------------------------------|---------------------------------------|
| 0.203291396                           | 137.3157018                           | 0.011851262                                 | 0.976418849                   | 136.0768818                           |
| 0.338547415                           | 224.513993                            | 0.031037441                                 | 0.983409593                   | 69.94907634                           |
| 0.273074954                           | 60.11727989                           | 0.019840696                                 | 0.971695652                   | 57.85591961                           |
| 0.252476742                           | -8.842626932                          | 0.011306183                                 | 0.98344701                    | 87.40225748                           |
| 0.21546311                            | -353.3020019                          | 0.013618813                                 | 0.974916086                   | 156.8814724                           |
| 0.241834862                           | -59.00519812                          | 0.015025442                                 | 0.974233224                   | 70.91078041                           |
| 0.353837051                           | 156.3567183                           | 0.043638619                                 | 0.971101052                   | 48.62178628                           |
| 0.185815343                           | 105.1727825                           | 0.009614337                                 | 0.9738757                     | 151.4552263                           |
| 0.235285113                           | 136.0031185                           | 0.01132952                                  | 0.983463083                   | 123.0016042                           |
| 0.301199283                           | 206.4709732                           | 0.01646621                                  | 0.984778046                   | 72.70136413                           |
| 0.220481161                           | -132.395975                           | 0.013446639                                 | 0.972206565                   | 86.24431354                           |
| 0.260269548                           | 248.9629425                           | 0.012364572                                 | 0.981005435                   | 95.75201559                           |
| 0.296421337                           | 361.1301411                           | 0.01330006                                  | 0.980719526                   | 98.15464292                           |
| 0.246673797                           | -268.0472472                          | 0.013718859                                 | 0.978622453                   | 87.30180183                           |
| 0.249435584                           | 124.5032711                           | 0.013521943                                 | 0.982309827                   | 86.94638405                           |
| 0.504823792                           | 34.05533178                           | 0.115680009                                 | 0.992474691                   | 42.87561997                           |
| 0.212804048                           | -276.9497386                          | 0.012337365                                 | 0.975205878                   | 106.8777708                           |
| 0.243638688                           | 451.3081802                           | 0.012182903                                 | 0.978040949                   | 112.6684528                           |
| 0.205882205                           | -846.1103021                          | 0.014594294                                 | 0.973102793                   | 129.8187762                           |
| 0.355472993                           | 171.2783863                           | 0.038643363                                 | 0.983855722                   | 51.87234528                           |
| 0.387720969                           | 57.84537771                           | 0.031155629                                 | 0.990350047                   | 41.42297623                           |
| 0.264086362                           | 267.7659648                           | 0.012042087                                 | 0.985038996                   | 89.79074444                           |
| 0.294439006                           | 193.7530105                           | 0.017535046                                 | 0.986243199                   | 70.17557982                           |
| 0.25009004                            | -250.7705445                          | 0.0150204                                   | 0.973633643                   | 103.8507569                           |
| 0.326630735                           | 60.30052332                           | 0.018974521                                 | 0.977963346                   | 42.37126185                           |
| 0.213065545                           | 214.6005971                           | 0.013037508                                 | 0.974262523                   | 76.74874814                           |
| 0.43515171                            | 136.4233775                           | 0.085295359                                 | 0.990279835                   | 46.49835262                           |
| 0.289810265                           | 165.1176002                           | 0.015718998                                 | 0.981288565                   | 71.82309794                           |
| 0.214763021                           | -80.8121237                           | 0.009741373                                 | 0.973613685                   | 104.8622492                           |
| 0.347285333                           | 10.53317078                           | 0.026436196                                 | 0.984932239                   | 72.71285935                           |
| 0.311208236                           | 239.5405685                           | 0.021414085                                 | 0.983734866                   | 56.23872421                           |
| 0.310940587                           | 182.9968559                           | 0.026583164                                 | 0.987514127                   | 80.58293337                           |
| 0.24671856                            | 54.46238987                           | 0.010983913                                 | 0.981078391                   | 102.9058977                           |
| 0.22900763                            | 17.66020769                           | 0.026369512                                 | 0.955856439                   | 70.30494649                           |
| 0.237589198                           | -327.9623169                          | 0.021095018                                 | 0.972750768                   | 88.13946716                           |
| 0.22969929                            | -6.114925155                          | 0.010353797                                 | 0.976654642                   | 101.0540267                           |
| 0.269250355                           | 436.4198702                           | 0.012746859                                 | 0.984283499                   | 91.8845289                            |
| 0.336907865                           | -11.50342178                          | 0.021274602                                 | 0.984247488                   | 67.87332641                           |
| 0.300802756                           | -447.1130575                          | 0.030154649                                 | 0.985601077                   | 81.29910486                           |
| 0.24049115                            | -24.3785204                           | 0.014693811                                 | 0.978195535                   | 95.42454419                           |
| 0.314123789                           | 78.896447                             | 0.02565315                                  | 0.989238869                   | 66.40704806                           |
| 0.198303243                           | -74.20377814                          | 0.011293601                                 | 0.974689893                   | 134.3836991                           |
| 0.217331968                           | -116.0231243                          | 0.011327899                                 | 0.975246944                   | 96.05783864                           |
| 0.203913726                           | -66.10739433                          | 0.011937205                                 | 0.975677875                   | 138.0174106                           |
| 0.274688194                           | 284.1084437                           | 0.013224086                                 | 0.980474107                   | 88.94402394                           |
| 0.385893169                           | 196.6898366                           | 0.033226034                                 | 0.985080021                   | 42.11351419                           |
| 0.293076506                           | 50.36791818                           | 0.013329598                                 | 0.985795634                   | 77.0671614                            |
| 0.211212162                           | -124.2529636                          | 0.012615608                                 | 0.971156598                   | 102.1485766                           |
| 0.233462628                           | -23.02001536                          | 0.026362059                                 | 0.959083546                   | 56.21776387                           |
| 0.193457214                           | -433.9148253                          | 0.01509804                                  | 0.980186355                   | 150.3578733                           |
| 0.31340841                            | 194.3042172                           | 0.02584686                                  | 0.98443739                    | 73.1441561                            |
| 0.200915746                           | -96.66565507                          | 0.011564723                                 | 0.960877572                   | 96.69135332                           |
| 0.266235301                           | 329.7178661                           | 0.018607496                                 | 0.984311818                   | 84.47285449                           |
| 0.274916577                           | -70.58043237                          | 0.018874489                                 | 0.979449207                   | 68.72359661                           |
| 0.398935432                           | 254.4714438                           | 0.066495825                                 | 0.985248177                   | 61.84985111                           |
| 0.197979325                           | -74.45103901                          | 0.011181865                                 | 0.977633609                   | 111.4513357                           |
| 0.210568081                           | 36.7521789                            | 0.009275286                                 | 0.976359487                   | 98.49864929                           |
| 0.2323416                             | -288.4845922                          | 0.015163754                                 | 0.98524843                    | 112.6895525                           |
| 0.270288528                           | 225.4949336                           | 0.016420117                                 | 0.980556393                   | 93.09286126                           |
| 0.258797581                           | -84.84799162                          | 0.015348986                                 | 0.974988571                   | 65.90491399                           |
| 0.225245679                           | 362.682214                            | 0.010709648                                 | 0.978442782                   | 109.1004402                           |
| 0.26903535                            | 390.6512623                           | 0.015059756                                 | 0.985781258                   | 107.6997655                           |
| 0.371844484                           | 182.6947093                           | 0.037041732                                 | 0.987333774                   | 45.63307273                           |
| 0.40826232                            | 186.9766685                           | 0.042628652                                 | 0.98604763                    | 44.63327253                           |
| 0.207654138                           | 196.8070446                           | 0.017442937                                 | 0.966896111                   | 94.71860243                           |
| 0.273332109                           | 342.2405691                           | 0.013945978                                 | 0.982538088                   | 85.93199032                           |
| 0.197996419                           | -436.2850941                          | 0.015636047                                 | 0.97158722                    | 136.9016252                           |
| 0.245735145                           | 273.4888926                           | 0.017515524                                 | 0.977047008                   | 119.4318754                           |
| 0.175826283                           | -399.6394138                          | 0.01629626                                  | 0.96769074                    | 125.5507102                           |
| 0.260840374                           | 288.351443                            | 0.013035368                                 | 0.979113053                   | 87.44209743                           |
| 0.252582969                           | 250.3669317                           | 0.013024996                                 | 0.979314763                   | 97.76362143                           |
| 0.202300588                           | 149.2618991                           | 0.009179848                                 | 0.972782179                   | 122.5025262                           |
| 0.322177434                           | 253.6213727                           | 0.022043119                                 | 0.984352554                   | 65.9723477                            |
| 0.360496261                           | 141.2357667                           | 0.022158026                                 | 0.988483442                   | 53.19775787                           |
| 0.384766595                           | 399.9906125                           | 0.038361897                                 | 0.988914857                   | 65.02041925                           |
| 0.189053876                           | 42.2118664                            | 0.010274451                                 | 0.979533508                   | 123.4717793                           |
| 0.233083296                           | 55.15532366                           | 0.010070359                                 | 0.97838927                    | 87.41313292                           |
| 0.185525094                           | 42.35539003                           | 0.011588287                                 | 0.9698114                     | 129.8303875                           |
| 0.233615284                           | 267.1041452                           | 0.01127292                                  | 0.972755196                   | 94.30816118                           |
| 0.27136109                            | 19.25344413                           | 0.013273703                                 | 0.985093083                   | 68.45327278                           |
| 0.166696328                           | -265.7080779                          | 0.012870789                                 | 0.967129023                   | 150.5463934                           |
| 0.223804935                           | -107.0533261                          | 0.012126454                                 | 0.979614875                   | 96.30414927                           |
| 0.270398589                           | 340.0955891                           | 0.018163741                                 | 0.98460275                    | 95.0849634                            |
| 0.290105234                           | -0.326205999                          | 0.036685205                                 | 0.963412551                   | 33.1015742                            |
| 0.288511515                           | 243.7695326                           | 0.015157892                                 | 0.981545475                   | 67.2508272                            |
| 0.356968054                           | 257.1954608                           | 0.023802338                                 | 0.98703363                    | 57.18158055                           |
| 0.200521598                           | 306.4013506                           | 0.0103463                                   | 0.975699485                   | 127.9170012                           |
| 0.17931596                            | -456.8247389                          | 0.007498139                                 | 0.975829889                   | 154.0659947                           |
| 0.288714434                           | 37.29698233                           | 0.034246697                                 | 0.97168942                    | 63.56063279                           |
| 0.25085293                            | 325.7359858                           | 0.032992897                                 | 0.965839716                   | 63.57043062                           |
| 0.304898691                           | 180.7524243                           | 0.034662461                                 | 0.986004607                   | 80.67419128                           |
| 0.2020163                             | 374.7124156                           | 0.010008615                                 | 0.974188395                   | 117.240193                            |
| 0.352683065                           | 117.4261665                           | 0.025715189                                 | 0.979796693                   | 51.32086502                           |
| 0.313286558                           | 212.4729575                           | 0.016730398                                 | 0.98481902                    | 63.79425275                           |
| 0.346449421                           | 120.3029724                           | 0.033831924                                 | 0.984549206                   | 62.3492422                            |
| 0.159095186                           | -1109.410851                          | 0.015190134                                 | 0.968856741                   | 183.302949                            |
| 0.260347841                           | 20.53912025                           | 0.014037298                                 | 0.979363376                   | 93.15089772                           |
| 0.223565209                           | 57.5119679                            | 0.024869424                                 | 0.939120505                   | 48.96989158                           |
| 0.295233228                           | -202.4719646                          | 0.023894378                                 | 0.978794763                   | 69.8497848                            |
| 0.27135847                            | 221.8228213                           | 0.02622423                                  | 0.981326975                   | 126.0421739                           |

| log.sigma.5.0.mm.3D_glcmm_Contrast | log.sigma.5.0.mm.3D_glcmm_DifferenceEntropy | log.sigma.5.0.mm.3D_glcmm_InverseVariance | log.sigma.5.0.mm.3D_glcmm_Entropy | log.sigma.5.0.mm.3D_glcmm_Dissimilarity |
|------------------------------------|---------------------------------------------|-------------------------------------------|-----------------------------------|-----------------------------------------|
| 27.37864345                        | 3.345446494                                 | 0.207495278                               | 8.318367533                       | 4.206891962                             |
| 14.8414066                         | 3.01667857                                  | 0.316052863                               | 7.705211859                       | 2.827524058                             |
| 14.86025717                        | 2.949224107                                 | 0.273221039                               | 7.304386773                       | 3.055261034                             |
| 20.08927332                        | 3.210764156                                 | 0.258204571                               | 8.227142716                       | 3.520778983                             |
| 25.97795438                        | 3.347773105                                 | 0.219649781                               | 7.95262524                        | 4.039580407                             |
| 18.72528299                        | 3.139743479                                 | 0.24503732                                | 7.755929602                       | 3.465462674                             |
| 9.268533185                        | 2.602481787                                 | 0.340017822                               | 6.702690854                       | 2.305678861                             |
| 34.43398207                        | 3.571621456                                 | 0.195918098                               | 8.688585771                       | 4.696366155                             |
| 23.88640783                        | 3.35778519                                  | 0.24279796                                | 8.534790993                       | 3.798764376                             |
| 14.43815177                        | 3.025930736                                 | 0.300945816                               | 7.856782881                       | 2.905001542                             |
| 23.36509804                        | 3.26307099                                  | 0.220768542                               | 7.993132791                       | 3.911137768                             |
| 18.14302133                        | 3.14092064                                  | 0.262663811                               | 8.089566224                       | 3.335522318                             |
| 13.95286114                        | 2.9784106                                   | 0.296374111                               | 7.964205322                       | 2.872552253                             |
| 17.80177888                        | 3.12215151                                  | 0.258705833                               | 8.003529147                       | 3.366340868                             |
| 19.19541108                        | 3.1776319                                   | 0.255904553                               | 7.974317596                       | 3.433475075                             |
| 8.079415816                        | 2.560053329                                 | 0.362616928                               | 6.66533334                        | 1.799749456                             |
| 23.89536755                        | 3.240127506                                 | 0.220765407                               | 8.0921786                         | 3.934886474                             |
| 24.0916002                         | 3.318601573                                 | 0.24703532                                | 8.399384837                       | 3.806757528                             |
| 31.59364334                        | 3.485572669                                 | 0.204759193                               | 8.208253554                       | 4.455863349                             |
| 10.69287079                        | 2.834524977                                 | 0.331814055                               | 7.367572047                       | 2.446760754                             |
| 8.422277432                        | 2.700886936                                 | 0.360573189                               | 7.155671094                       | 2.150900007                             |
| 17.12689743                        | 3.112271961                                 | 0.267507704                               | 8.022826409                       | 3.235055127                             |
| 14.7671458                         | 3.025659168                                 | 0.297952053                               | 7.829519232                       | 2.946721049                             |
| 19.28025068                        | 3.174671235                                 | 0.24248917                                | 7.845469615                       | 3.46584136                              |
| 10.41349774                        | 2.802248058                                 | 0.328744261                               | 7.21391072                        | 2.505783452                             |
| 26.65716864                        | 3.387265411                                 | 0.221339616                               | 8.120806824                       | 4.091103584                             |
| 7.987583613                        | 2.650175266                                 | 0.3621171                                 | 6.98955883                        | 1.977139571                             |
| 14.46105134                        | 3.006199416                                 | 0.288731473                               | 7.76205153                        | 2.959494443                             |
| 23.71977839                        | 3.268289246                                 | 0.218391907                               | 8.293267023                       | 3.952033934                             |
| 14.36334692                        | 3.014013624                                 | 0.319208413                               | 7.773452392                       | 2.760275221                             |
| 12.50837903                        | 2.933953892                                 | 0.310936237                               | 7.574557333                       | 2.728307453                             |
| 15.98084912                        | 3.077194428                                 | 0.286067149                               | 7.993054052                       | 3.009942699                             |
| 20.49060337                        | 3.230963776                                 | 0.25326969                                | 8.317036617                       | 3.560491719                             |
| 19.67173513                        | 3.077904222                                 | 0.228133116                               | 6.485045253                       | 3.616560609                             |
| 21.49369812                        | 3.208350503                                 | 0.242371138                               | 7.542456586                       | 3.669486224                             |
| 22.37728863                        | 3.272226244                                 | 0.235425636                               | 8.305217402                       | 3.783879966                             |
| 19.11241818                        | 3.199062727                                 | 0.268355967                               | 8.100045386                       | 3.370247695                             |
| 10.35969386                        | 2.817144471                                 | 0.332517852                               | 7.605244596                       | 2.473288844                             |
| 15.48955912                        | 3.051050286                                 | 0.291415924                               | 7.575871138                       | 2.99676718                              |
| 22.41411849                        | 3.284210986                                 | 0.243267389                               | 8.138849802                       | 3.705018971                             |
| 15.43345049                        | 3.051825407                                 | 0.310891081                               | 7.702494552                       | 2.909496826                             |
| 29.56351074                        | 3.449029707                                 | 0.202949382                               | 8.480985855                       | 4.364637581                             |
| 23.83763817                        | 3.262427812                                 | 0.227247638                               | 8.23665235                        | 3.917250891                             |
| 28.4417406                         | 3.424249329                                 | 0.219218362                               | 8.519397921                       | 4.24231407                              |
| 17.51673954                        | 3.136479085                                 | 0.276270394                               | 8.061125338                       | 3.232413613                             |
| 9.104671946                        | 2.713890718                                 | 0.356697314                               | 6.954597445                       | 2.218130089                             |
| 14.32409172                        | 3.033470686                                 | 0.293037738                               | 7.996297408                       | 2.923119572                             |
| 24.37535922                        | 3.281644106                                 | 0.219200688                               | 8.023478408                       | 3.995570027                             |
| 18.25531201                        | 3.035681559                                 | 0.238633507                               | 6.716019369                       | 3.457270605                             |
| 33.56210145                        | 3.547424343                                 | 0.200806929                               | 8.216481141                       | 4.610207804                             |
| 13.77781831                        | 3.002288193                                 | 0.296339889                               | 7.83019764                        | 2.835681582                             |
| 26.92861325                        | 3.330726404                                 | 0.206866421                               | 8.041618114                       | 4.224798374                             |
| 20.19642172                        | 3.235362088                                 | 0.262315779                               | 8.191958628                       | 3.469101338                             |
| 14.78076326                        | 3.008145262                                 | 0.288483351                               | 7.592688181                       | 3.026755669                             |
| 13.22190021                        | 2.912273613                                 | 0.325167511                               | 7.375619927                       | 2.523130532                             |
| 29.12941152                        | 3.444177337                                 | 0.211152089                               | 8.370005972                       | 4.335103952                             |
| 27.58130149                        | 3.341973784                                 | 0.216249865                               | 8.397591837                       | 4.165031386                             |
| 24.66565154                        | 3.350691515                                 | 0.236229097                               | 8.308231162                       | 3.901295407                             |
| 16.19200432                        | 3.068214196                                 | 0.271861381                               | 7.901619759                       | 3.145250491                             |
| 14.12698076                        | 2.896392852                                 | 0.263783283                               | 7.592194311                       | 3.052446875                             |
| 25.04643523                        | 3.379762118                                 | 0.234001347                               | 8.402732571                       | 3.943257488                             |
| 19.26396173                        | 3.217781901                                 | 0.264114361                               | 8.384029909                       | 3.399926212                             |
| 9.655778931                        | 2.754130696                                 | 0.342124625                               | 7.179094714                       | 2.320264508                             |
| 10.02181443                        | 2.742545378                                 | 0.362192803                               | 7.035779632                       | 2.228387277                             |
| 24.48917815                        | 3.269792738                                 | 0.207140294                               | 7.396584387                       | 3.994434978                             |
| 17.70851578                        | 3.143046082                                 | 0.280147378                               | 8.007477382                       | 3.264753361                             |
| 31.58234143                        | 3.465717329                                 | 0.201202018                               | 8.050442619                       | 4.473352763                             |
| 25.25504874                        | 3.387668224                                 | 0.243465111                               | 8.540275187                       | 3.881956288                             |
| 33.61240574                        | 3.477231816                                 | 0.182381479                               | 8.109705296                       | 4.751672523                             |
| 18.70095609                        | 3.181577707                                 | 0.26030493                                | 8.091078874                       | 3.387724516                             |
| 22.59612627                        | 3.265628181                                 | 0.248061102                               | 8.292887028                       | 3.682660124                             |
| 28.14163132                        | 3.42108304                                  | 0.206219217                               | 8.462515252                       | 4.271662112                             |
| 14.89528929                        | 3.04935273                                  | 0.304324144                               | 7.797037805                       | 2.884385326                             |
| 11.55256603                        | 2.880787258                                 | 0.332399985                               | 7.459512829                       | 2.503474427                             |
| 11.20844152                        | 2.853251815                                 | 0.350926179                               | 7.476259633                       | 2.375381575                             |
| 32.93502189                        | 3.48729003                                  | 0.197557497                               | 8.503828761                       | 4.605596644                             |
| 20.67694528                        | 3.187975058                                 | 0.250989509                               | 8.03682297                        | 3.622281495                             |
| 31.35906257                        | 3.466887804                                 | 0.195084319                               | 8.295940209                       | 4.552357812                             |
| 23.02082656                        | 3.275755533                                 | 0.236870177                               | 8.19504031                        | 3.813785566                             |
| 14.9485348                         | 3.030575459                                 | 0.281567729                               | 7.855149835                       | 3.065275854                             |
| 43.93030966                        | 3.63719599                                  | 0.172796336                               | 8.337493038                       | 5.338491903                             |
| 22.08814127                        | 3.266808006                                 | 0.233235917                               | 8.191590754                       | 3.768953116                             |
| 19.79108524                        | 3.217557477                                 | 0.267886286                               | 8.1294303                         | 3.42862444                              |
| 11.68098019                        | 2.792276307                                 | 0.285198026                               | 6.456840029                       | 2.739559114                             |
| 15.38414499                        | 3.047247194                                 | 0.283250641                               | 7.82578009                        | 3.02666349                              |
| 10.67920116                        | 2.831566531                                 | 0.341442826                               | 7.442402015                       | 2.430963424                             |
| 28.25734314                        | 3.412611188                                 | 0.206564635                               | 8.328235729                       | 4.286246493                             |
| 37.29783348                        | 3.621750178                                 | 0.186459863                               | 8.837075274                       | 4.898151365                             |
| 13.56512098                        | 2.74445014                                  | 0.29225706                                | 6.685163769                       | 2.903432256                             |
| 18.34106276                        | 2.963954421                                 | 0.243758519                               | 6.337914629                       | 3.384510449                             |
| 19.06076291                        | 3.19779209                                  | 0.283853051                               | 8.074145922                       | 3.250207722                             |
| 30.56448577                        | 3.480298447                                 | 0.208510609                               | 8.233173168                       | 4.35017177                              |
| 9.523553456                        | 2.752903264                                 | 0.339057211                               | 7.232134877                       | 2.35556018                              |
| 13.4586305                         | 2.97231093                                  | 0.307461257                               | 7.735411688                       | 2.792125109                             |
| 11.92337001                        | 2.917706761                                 | 0.323502606                               | 7.618424435                       | 2.570772219                             |
| 38.99244296                        | 3.52022689                                  | 0.175553232                               | 7.796557022                       | 5.116412909                             |
| 18.5168091                         | 3.177028812                                 | 0.262650988                               | 8.081311342                       | 3.362500536                             |
| 20.58505686                        | 3.068133061                                 | 0.241548653                               | 6.444223111                       | 3.684216624                             |
| 11.92987049                        | 2.868580932                                 | 0.297841827                               | 7.322661989                       | 2.734939332                             |
| 21.70374985                        | 3.242613937                                 | 0.265596558                               | 8.055467063                       | 3.522867066                             |



| log.sigma.5.0.mm.3D_glc_m_DifferenceVariance | log.sigma.5.0.mm.3D_glc_m_ldn | log.sigma.5.0.mm.3D_glc_m_ldm | log.sigma.5.0.mm.3D_glc_m_Correlation | log.sigma.5.0.mm.3D_glc_m_Autocorrelation |
|----------------------------------------------|-------------------------------|-------------------------------|---------------------------------------|-------------------------------------------|
| 8.483833957                                  | 0.892842325                   | 0.203291396                   | 0.667293452                           | 275.2496682                               |
| 6.354227216                                  | 0.91685829                    | 0.338547415                   | 0.651610945                           | 188.5084134                               |
| 4.913422894                                  | 0.885356596                   | 0.273074954                   | 0.588405966                           | 138.297095                                |
| 6.902009812                                  | 0.910871889                   | 0.252476742                   | 0.627158412                           | 343.3679069                               |
| 8.837019591                                  | 0.891248901                   | 0.215546311                   | 0.718248068                           | 353.764918                                |
| 6.32169871                                   | 0.888861537                   | 0.241834862                   | 0.583530853                           | 172.7103688                               |
| 3.26604829                                   | 0.889079813                   | 0.353837051                   | 0.680649899                           | 71.7758062                                |
| 11.72695838                                  | 0.888245873                   | 0.185815343                   | 0.631409273                           | 300.4672495                               |
| 8.954094087                                  | 0.911717957                   | 0.235285113                   | 0.675009399                           | 377.8982683                               |
| 5.670012864                                  | 0.916435643                   | 0.301199283                   | 0.670808004                           | 178.6053734                               |
| 7.188738581                                  | 0.884142283                   | 0.220481161                   | 0.576373589                           | 218.0132614                               |
| 6.346349549                                  | 0.905282794                   | 0.260269548                   | 0.683033375                           | 180.9622236                               |
| 5.33398328                                   | 0.906205553                   | 0.296421337                   | 0.74951608                            | 150.6273579                               |
| 6.09849345                                   | 0.89825016                    | 0.246673797                   | 0.663129587                           | 270.4187176                               |
| 6.85350492                                   | 0.908082339                   | 0.249435584                   | 0.641918335                           | 234.4120175                               |
| 4.668865048                                  | 0.950363558                   | 0.504823792                   | 0.68489403                            | 257.382579                                |
| 7.130337639                                  | 0.890179052                   | 0.212804048                   | 0.638628672                           | 243.3813655                               |
| 8.666583603                                  | 0.899955242                   | 0.243638688                   | 0.650255597                           | 206.3068194                               |
| 10.44841955                                  | 0.888020555                   | 0.205882205                   | 0.615509719                           | 386.9326465                               |
| 4.510794963                                  | 0.916147852                   | 0.355472993                   | 0.657967548                           | 118.8312657                               |
| 3.658803269                                  | 0.934364769                   | 0.387720969                   | 0.661839215                           | 177.3650863                               |
| 6.172948461                                  | 0.915054156                   | 0.264086362                   | 0.681757103                           | 193.3349022                               |
| 5.706612849                                  | 0.919952739                   | 0.294439006                   | 0.655575041                           | 238.3678231                               |
| 6.693524602                                  | 0.889320031                   | 0.250090004                   | 0.687902858                           | 217.238154                                |
| 3.877335831                                  | 0.899667652                   | 0.326630735                   | 0.60541968                            | 90.8250335                                |
| 9.253440174                                  | 0.890115515                   | 0.213065545                   | 0.570937912                           | 210.2657647                               |
| 3.95140838                                   | 0.937927994                   | 0.43515171                    | 0.706371257                           | 173.5167599                               |
| 5.256309355                                  | 0.906591721                   | 0.289810265                   | 0.665299083                           | 134.6623759                               |
| 7.137559095                                  | 0.88639274                    | 0.214763021                   | 0.631478572                           | 267.6321959                               |
| 6.435439777                                  | 0.921064575                   | 0.347285333                   | 0.670603565                           | 192.5721883                               |
| 4.76800619                                   | 0.913111612                   | 0.311208236                   | 0.636266818                           | 135.5418695                               |
| 6.344332079                                  | 0.92495438                    | 0.310940587                   | 0.671792627                           | 249.2717443                               |
| 7.250805896                                  | 0.90513908                    | 0.24671856                    | 0.669580977                           | 270.1029604                               |
| 5.990904382                                  | 0.856534391                   | 0.22900763                    | 0.556509519                           | 102.441621                                |
| 7.206258761                                  | 0.887439358                   | 0.237589198                   | 0.610376674                           | 240.0763751                               |
| 7.443443955                                  | 0.893989107                   | 0.22969929                    | 0.638689234                           | 242.2594754                               |
| 7.336572144                                  | 0.914568418                   | 0.269250355                   | 0.656981968                           | 160.8993375                               |
| 4.031303707                                  | 0.914792361                   | 0.336907865                   | 0.735259956                           | 159.1147009                               |
| 6.016074703                                  | 0.918925399                   | 0.300802756                   | 0.682130988                           | 309.8493531                               |
| 8.190187468                                  | 0.899287661                   | 0.24049115                    | 0.622609957                           | 222.0416937                               |
| 6.648450891                                  | 0.930838448                   | 0.314123789                   | 0.627355596                           | 242.3122202                               |
| 9.600841918                                  | 0.889501343                   | 0.198303243                   | 0.641250148                           | 294.5331055                               |
| 7.367561459                                  | 0.890720221                   | 0.217331968                   | 0.606925594                           | 242.5969658                               |
| 9.507536609                                  | 0.892370994                   | 0.203913726                   | 0.662104316                           | 285.9622954                               |
| 6.617443523                                  | 0.905426894                   | 0.274688194                   | 0.670894639                           | 206.8003455                               |
| 3.931106843                                  | 0.92054778                    | 0.385893169                   | 0.642744228                           | 66.84176161                               |
| 5.510924121                                  | 0.918135449                   | 0.293076506                   | 0.687428041                           | 232.9683902                               |
| 7.574048368                                  | 0.882200776                   | 0.211212162                   | 0.617169721                           | 205.6956137                               |
| 5.74823081                                   | 0.861873039                   | 0.233462628                   | 0.510226597                           | 112.0924428                               |
| 11.39083022                                  | 0.901913225                   | 0.193457214                   | 0.638298546                           | 413.4611926                               |
| 5.423797581                                  | 0.91577624                    | 0.31340841                    | 0.683540916                           | 177.8894299                               |
| 7.985173016                                  | 0.864202738                   | 0.200915746                   | 0.566552671                           | 194.2818002                               |
| 7.582433973                                  | 0.914557292                   | 0.266235301                   | 0.616030107                           | 231.9349993                               |
| 5.321032263                                  | 0.901352799                   | 0.274916577                   | 0.64741166                            | 179.6563644                               |
| 6.432285283                                  | 0.925752028                   | 0.398935432                   | 0.653394178                           | 163.2101965                               |
| 9.496982838                                  | 0.895450144                   | 0.197979325                   | 0.587960462                           | 292.2160526                               |
| 8.381994516                                  | 0.894134258                   | 0.210568081                   | 0.56953971                            | 267.3550612                               |
| 8.626254904                                  | 0.915378248                   | 0.2323416                     | 0.645846656                           | 449.0371952                               |
| 5.901590581                                  | 0.904498877                   | 0.270288528                   | 0.703378912                           | 185.6359779                               |
| 4.233181009                                  | 0.888830916                   | 0.258797581                   | 0.647416254                           | 145.5012098                               |
| 9.006521534                                  | 0.899115229                   | 0.225245679                   | 0.627963208                           | 181.9783526                               |
| 7.21108334                                   | 0.918004224                   | 0.26903535                    | 0.699025536                           | 264.1107638                               |
| 3.929824954                                  | 0.925162861                   | 0.371844484                   | 0.651553193                           | 126.4648842                               |
| 4.794227023                                  | 0.926392345                   | 0.40826232                    | 0.631479259                           | 161.7288418                               |
| 7.995500924                                  | 0.874609538                   | 0.270654138                   | 0.589224084                           | 166.0431166                               |
| 6.583515046                                  | 0.909848685                   | 0.273332109                   | 0.659516374                           | 209.851354                                |
| 10.48105083                                  | 0.884537738                   | 0.197996419                   | 0.626314813                           | 307.3768717                               |
| 9.622119803                                  | 0.898425208                   | 0.245735145                   | 0.650818998                           | 223.4508536                               |
| 9.876449022                                  | 0.874141357                   | 0.175826283                   | 0.581606936                           | 281.5664716                               |
| 6.712082237                                  | 0.901223289                   | 0.260840374                   | 0.649287029                           | 175.5041452                               |
| 7.830257292                                  | 0.902770901                   | 0.252582969                   | 0.628841088                           | 201.6817473                               |
| 9.026184165                                  | 0.885553948                   | 0.202300588                   | 0.628871632                           | 243.9161339                               |
| 6.174446459                                  | 0.917451826                   | 0.322177434                   | 0.634781214                           | 148.8376689                               |
| 5.049264194                                  | 0.929348995                   | 0.360496261                   | 0.644169182                           | 207.6652874                               |
| 5.377219541                                  | 0.933073964                   | 0.384766595                   | 0.707637695                           | 189.7357893                               |
| 10.02665942                                  | 0.899634398                   | 0.189053876                   | 0.581072327                           | 325.4535991                               |
| 6.679370748                                  | 0.897922757                   | 0.233083296                   | 0.619963994                           | 177.2291003                               |
| 9.737098188                                  | 0.878973968                   | 0.185525094                   | 0.61524108                            | 224.2978313                               |
| 7.506366237                                  | 0.88713632                    | 0.233615284                   | 0.607816797                           | 142.0806963                               |
| 5.20513224                                   | 0.914175467                   | 0.27136109                    | 0.64371981                            | 278.3223311                               |
| 13.34437419                                  | 0.875490064                   | 0.166696328                   | 0.5525935                             | 285.3676097                               |
| 7.22516216                                   | 0.899881909                   | 0.223804935                   | 0.629288803                           | 233.1975361                               |
| 7.386510829                                  | 0.91546573                    | 0.270398589                   | 0.656679583                           | 290.849778                                |
| 3.838906155                                  | 0.869981247                   | 0.290105234                   | 0.481464001                           | 84.13546111                               |
| 5.698895368                                  | 0.907899804                   | 0.288511515                   | 0.62745589                            | 146.7795634                               |
| 4.489174982                                  | 0.924520803                   | 0.356968054                   | 0.685209405                           | 186.155165                                |
| 9.172016946                                  | 0.891046611                   | 0.200521598                   | 0.640955978                           | 213.6859181                               |
| 12.2758283                                   | 0.891906056                   | 0.17931596                    | 0.61484591                            | 548.6792097                               |
| 3.703699808                                  | 0.885977181                   | 0.288714434                   | 0.637705713                           | 169.2539764                               |
| 5.922960516                                  | 0.875293259                   | 0.25085293                    | 0.558107447                           | 91.84262132                               |
| 7.900883442                                  | 0.92192482                    | 0.304898691                   | 0.618724838                           | 334.1735437                               |
| 10.90273562                                  | 0.890351733                   | 0.2020163                     | 0.590436935                           | 161.709173                                |
| 3.738975682                                  | 0.905268954                   | 0.352683065                   | 0.685809771                           | 90.86075881                               |
| 5.278950812                                  | 0.916948978                   | 0.313286558                   | 0.652789893                           | 156.355301                                |
| 5.086272381                                  | 0.91821412                    | 0.346449421                   | 0.67786115                            | 129.3471752                               |
| 10.65780868                                  | 0.876156751                   | 0.159095186                   | 0.649374952                           | 386.977364                                |
| 6.77979442                                   | 0.901886277                   | 0.260347841                   | 0.67032844                            | 255.5913458                               |
| 6.229017311                                  | 0.834719104                   | 0.223565209                   | 0.415055624                           | 67.01473094                               |
| 4.162647125                                  | 0.899415853                   | 0.295233228                   | 0.710268842                           | 177.6661123                               |
| 8.307632763                                  | 0.909384051                   | 0.27135847                    | 0.710994663                           | 213.794344                                |

| log.sigma.5.0.mm.3D_glcm_SumEntropy | log.sigma.5.0.mm.3D_glcm_AverageIntensity | log.sigma.5.0.mm.3D_glcm_Energy | log.sigma.5.0.mm.3D_glcm_SumSquares | log.sigma.5.0.mm.3D_glcm_ClusterProminence |
|-------------------------------------|-------------------------------------------|---------------------------------|-------------------------------------|--------------------------------------------|
| 5.485070004                         | 15.89047278                               | 0.003854563                     | 41.77138941                         | 49553.73071                                |
| 5.033874943                         | 13.25763097                               | 0.007929952                     | 21.75784147                         | 17758.43356                                |
| 4.845247031                         | 11.29140072                               | 0.007778687                     | 18.1790442                          | 8044.329959                                |
| 5.242825476                         | 18.20408133                               | 0.004365308                     | 27.05481467                         | 22596.12383                                |
| 5.467453089                         | 18.00434396                               | 0.004781391                     | 46.07806181                         | 55812.98229                                |
| 5.016911935                         | 12.63655397                               | 0.005552841                     | 22.44924559                         | 12654.85594                                |
| 4.628488572                         | 7.868172366                               | 0.012771403                     | 14.47257987                         | 5835.575706                                |
| 5.581458085                         | 16.6369937                                | 0.00297621                      | 46.76553249                         | 57236.02609                                |
| 5.469553513                         | 18.93650084                               | 0.003623993                     | 36.47669798                         | 44022.2966                                 |
| 5.096731473                         | 12.84760169                               | 0.005857812                     | 22.32628427                         | 15101.13981                                |
| 5.16430447                          | 14.25885903                               | 0.004788845                     | 27.9021674                          | 17903.26866                                |
| 5.264832411                         | 12.75882942                               | 0.004602341                     | 29.1942166                          | 24567.53663                                |
| 5.270165428                         | 11.38631464                               | 0.005068731                     | 28.11140152                         | 24882.79676                                |
| 5.189344686                         | 15.9499961                                | 0.004880404                     | 26.75331529                         | 19694.13996                                |
| 5.194703442                         | 14.85525062                               | 0.005057802                     | 27.54244517                         | 22666.13502                                |
| 4.577883998                         | 15.80949121                               | 0.028776478                     | 8951.098653                         | 8951.098653                                |
| 5.310779653                         | 15.00846717                               | 0.004553759                     | 33.69301737                         | 29712.07999                                |
| 5.392356349                         | 13.67758823                               | 0.003877322                     | 35.31062672                         | 35231.65706                                |
| 5.386013108                         | 19.2715498                                | 0.004373082                     | 40.3588374                          | 49632.38662                                |
| 4.830584516                         | 10.41786455                               | 0.009136021                     | 15.64130402                         | 9233.454943                                |
| 4.709980451                         | 13.0115007                                | 0.010666866                     | 12.56564136                         | 5984.690878                                |
| 5.227924154                         | 13.29850527                               | 0.004841681                     | 27.37221032                         | 23837.74011                                |
| 5.068212504                         | 15.05931681                               | 0.006376516                     | 21.90139846                         | 15784.28757                                |
| 5.230108836                         | 14.00847992                               | 0.005286539                     | 30.88632904                         | 23674.45149                                |
| 4.691260159                         | 9.100866325                               | 0.008546964                     | 13.1961899                          | 4730.614212                                |
| 5.237967865                         | 14.00566139                               | 0.004505094                     | 32.17002097                         | 24366.27007                                |
| 4.724005595                         | 12.80868511                               | 0.017050625                     | 13.7402684                          | 8150.117143                                |
| 5.070193143                         | 10.97412302                               | 0.005996951                     | 21.68954095                         | 14380.85849                                |
| 5.320885227                         | 15.80446254                               | 0.003804361                     | 32.93846339                         | 24325.37248                                |
| 5.089272793                         | 13.38581555                               | 0.007503104                     | 22.36795914                         | 16496.41456                                |
| 4.894495178                         | 11.16696511                               | 0.007353132                     | 17.27897382                         | 11068.99654                                |
| 5.182770523                         | 15.4105874                                | 0.005868523                     | 24.91955344                         | 19415.63497                                |
| 5.345245074                         | 15.90382241                               | 0.003996375                     | 31.61578541                         | 28373.55231                                |
| 4.658536904                         | 9.47241786                                | 0.012339407                     | 22.4941704                          | 10152.25357                                |
| 5.065295271                         | 14.96799082                               | 0.006723932                     | 27.73579884                         | 21482.06244                                |
| 5.306603432                         | 14.99922629                               | 0.003831605                     | 31.69735907                         | 23581.16489                                |
| 5.226040093                         | 12.02764779                               | 0.004774566                     | 28.74567923                         | 24425.11864                                |
| 5.033849346                         | 12.03031429                               | 0.006926313                     | 19.55825507                         | 11594.84983                                |
| 5.052834441                         | 17.20751242                               | 0.008347441                     | 24.57623393                         | 22819.15043                                |
| 5.255064753                         | 14.34610583                               | 0.004653532                     | 30.19218576                         | 25215.76507                                |
| 5.012756812                         | 15.30141566                               | 0.007360426                     | 21.13333622                         | 14473.37724                                |
| 5.484432537                         | 16.51518206                               | 0.003448625                     | 41.56193309                         | 44831.1982                                 |
| 5.26289804                          | 15.05491905                               | 0.004023856                     | 30.65039577                         | 21549.96654                                |
| 5.527202353                         | 16.2116463                                | 0.003447041                     | 42.41802936                         | 49810.75155                                |
| 5.208629974                         | 13.77683308                               | 0.004901845                     | 27.05126573                         | 21326.19612                                |
| 4.623182037                         | 7.653516739                               | 0.012130799                     | 12.80454653                         | 5749.113106                                |
| 5.162224215                         | 14.80488845                               | 0.005237539                     | 23.4823245                          | 16289.73032                                |
| 5.259853166                         | 13.68658221                               | 0.004601608                     | 32.26364307                         | 24647.19193                                |
| 4.596320971                         | 10.12514272                               | 0.010816178                     | 18.61826897                         | 7423.862858                                |
| 5.511709672                         | 19.79066024                               | 0.004309324                     | 44.87692992                         | 69888.31595                                |
| 5.097453249                         | 12.79368562                               | 0.006153365                     | 22.13168648                         | 15621.4211                                 |
| 5.183190911                         | 13.29662482                               | 0.004446001                     | 30.90499164                         | 18703.85302                                |
| 5.198813976                         | 14.81993365                               | 0.004849414                     | 26.96534924                         | 23628.08038                                |
| 5.010340919                         | 12.8906131                                | 0.006711057                     | 20.90021377                         | 13677.38444                                |
| 4.876478412                         | 12.31707648                               | 0.014747824                     | 19.19608551                         | 14332.5083                                 |
| 5.363825396                         | 16.67788389                               | 0.003766225                     | 35.6840052                          | 32299.77212                                |
| 5.302796678                         | 16.00544525                               | 0.003621418                     | 32.59723421                         | 24420.57898                                |
| 5.371602392                         | 20.8545047                                | 0.004403126                     | 33.67595612                         | 38187.46618                                |
| 5.238052286                         | 12.92639278                               | 0.005427556                     | 27.79787528                         | 23557.77687                                |
| 4.996323124                         | 11.51167655                               | 0.006387295                     | 20.00797369                         | 10833.61261                                |
| 5.346027013                         | 12.77568502                               | 0.003674144                     | 34.50742075                         | 29014.35373                                |
| 5.385818725                         | 15.6593642                                | 0.004089754                     | 32.152898                           | 37237.67009                                |
| 4.722553603                         | 10.84494779                               | 0.011096228                     | 13.96578613                         | 8766.06981                                 |
| 4.690943208                         | 12.37553043                               | 0.012801183                     | 13.72961313                         | 7074.810139                                |
| 5.039835454                         | 12.21447585                               | 0.006816797                     | 30.40481934                         | 22722.57045                                |
| 5.183667468                         | 13.97726606                               | 0.005204158                     | 26.93211533                         | 20726.22265                                |
| 5.410799984                         | 16.82962505                               | 0.004701556                     | 42.48424041                         | 48912.76682                                |
| 5.436113764                         | 14.22250799                               | 0.003589803                     | 37.02031281                         | 37384.3172                                 |
| 5.351400415                         | 16.22552083                               | 0.004481674                     | 40.77168396                         | 40521.57122                                |
| 5.209632859                         | 12.6174917                                | 0.004762914                     | 27.09734958                         | 20416.77874                                |
| 5.295315609                         | 13.61977639                               | 0.00417696                      | 31.06257603                         | 24196.57245                                |
| 5.431099994                         | 14.9556772                                | 0.003394046                     | 38.6651759                          | 36690.44831                                |
| 5.015103917                         | 11.69679882                               | 0.006620812                     | 20.72471276                         | 13749.97213                                |
| 4.869117861                         | 14.10294554                               | 0.008129164                     | 16.7807464                          | 8315.032769                                |
| 4.937851015                         | 13.33363557                               | 0.011174529                     | 19.76305183                         | 16693.62701                                |
| 5.441541872                         | 17.64641843                               | 0.003422814                     | 38.97295234                         | 43803.23856                                |
| 5.182759367                         | 12.70895413                               | 0.004510913                     | 27.55350891                         | 18071.78432                                |
| 5.430781883                         | 14.30025302                               | 0.003767062                     | 42.09972965                         | 39144.85726                                |
| 5.236642655                         | 11.17282531                               | 0.004174867                     | 29.84754427                         | 21226.90538                                |
| 5.061783535                         | 16.38570698                               | 0.005475955                     | 21.5682609                          | 13245.61466                                |
| 5.498647952                         | 16.32163089                               | 0.003755905                     | 49.54828916                         | 57775.28451                                |
| 5.260133611                         | 14.74808649                               | 0.00414346                      | 30.39113559                         | 21322.42573                                |
| 5.274692228                         | 16.65323949                               | 0.004767615                     | 29.12825258                         | 28325.97131                                |
| 4.353893122                         | 8.873570658                               | 0.013685576                     | 11.1956386                          | 2725.835133                                |
| 5.023636485                         | 11.57648771                               | 0.005742938                     | 20.83252469                         | 13121.74085                                |
| 4.89980782                          | 13.22930402                               | 0.008815807                     | 17.25621533                         | 10408.74956                                |
| 5.433838286                         | 13.85949527                               | 0.003729902                     | 40.22006813                         | 40955.44762                                |
| 5.60154661                          | 22.99748581                               | 0.002690624                     | 46.68001334                         | 58473.70943                                |
| 4.68644598                          | 12.51931238                               | 0.011955341                     | 19.28143844                         | 8182.902132                                |
| 4.530774594                         | 8.968285469                               | 0.013924387                     | 20.47787334                         | 12586.40094                                |
| 5.150636063                         | 17.98781413                               | 0.006535856                     | 24.97467775                         | 23724.83247                                |
| 5.342853127                         | 11.95676261                               | 0.003923229                     | 38.54793631                         | 34274.2798                                 |
| 4.803422707                         | 8.966848392                               | 0.008832541                     | 15.21110462                         | 6992.866703                                |
| 4.999958864                         | 12.01016682                               | 0.006571518                     | 19.63864294                         | 13272.9747                                 |
| 4.96729092                          | 10.80727831                               | 0.007692423                     | 18.63061463                         | 11203.20812                                |
| 5.455945107                         | 18.98994034                               | 0.005187531                     | 55.67582146                         | 82480.42424                                |
| 5.252428816                         | 15.44990971                               | 0.004783713                     | 28.57395653                         | 22627.76208                                |
| 4.498642827                         | 7.737337837                               | 0.011008033                     | 17.38873711                         | 5144.726802                                |
| 4.959654486                         | 12.77308406                               | 0.007803568                     | 20.44491382                         | 12153.02336                                |
| 5.408018476                         | 13.85505916                               | 0.005315329                     | 38.59497524                         | 43845.62831                                |

| log.sigma.5.0.mm.3D_glc_m_SumAverage | log.sigma.5.0.mm.3D_glc_m_Imc2 | log.sigma.5.0.mm.3D_glc_m_Imc1 | log.sigma.5.0.mm.3D_glc_m_DifferenceAverage | log.sigma.5.0.mm.3D_glc_m_Id |
|--------------------------------------|--------------------------------|--------------------------------|---------------------------------------------|------------------------------|
| 31.49846318                          | 0.928944814                    | -0.217950854                   | 4.206891962                                 | 0.299269376                  |
| 26.43679515                          | 0.844988132                    | -0.161177841                   | 2.827524058                                 | 0.414190573                  |
| 22.58280145                          | 0.888046531                    | -0.200823467                   | 3.055261034                                 | 0.363769414                  |
| 36.14028714                          | 0.806781356                    | -0.132253008                   | 3.520778983                                 | 0.342266164                  |
| 35.83183333                          | 0.969190886                    | -0.301871538                   | 4.039580407                                 | 0.310299244                  |
| 25.26886275                          | 0.863265878                    | -0.166953099                   | 3.465462674                                 | 0.33584812                   |
| 15.73634473                          | 0.909033977                    | -0.246796486                   | 2.305678861                                 | 0.432297043                  |
| 32.93328468                          | 0.893986113                    | -0.173271227                   | 4.696366155                                 | 0.280843306                  |
| 37.58217045                          | 0.854809957                    | -0.150525214                   | 3.798764376                                 | 0.327251504                  |
| 25.61534305                          | 0.819610797                    | -0.142990749                   | 2.905001542                                 | 0.38557197                   |
| 28.44236205                          | 0.869848888                    | -0.167159495                   | 3.911137768                                 | 0.314779513                  |
| 25.42001043                          | 0.863794988                    | -0.16678827                    | 3.335522318                                 | 0.350823702                  |
| 22.76513438                          | 0.877687482                    | -0.182918078                   | 2.872552253                                 | 0.382963362                  |
| 31.81382358                          | 0.856621752                    | -0.160370939                   | 3.366340868                                 | 0.339983976                  |
| 29.4933096                           | 0.883158677                    | -0.178342453                   | 3.433475075                                 | 0.341783438                  |
| 31.53916847                          | 0.873750339                    | -0.207278067                   | 1.799749456                                 | 0.55439812                   |
| 29.8369449                           | 0.907255432                    | -0.200509966                   | 3.934886474                                 | 0.308981808                  |
| 27.14021941                          | 0.844698355                    | -0.14952736                    | 3.806757528                                 | 0.332939439                  |
| 38.0686435                           | 0.924629846                    | -0.214735809                   | 4.455863349                                 | 0.298789594                  |
| 20.8357291                           | 0.811257894                    | -0.146113364                   | 2.446760754                                 | 0.431624322                  |
| 26.00864154                          | 0.794187024                    | -0.140935386                   | 2.150900007                                 | 0.458581644                  |
| 26.46952772                          | 0.856534298                    | -0.162724965                   | 3.235055127                                 | 0.354907432                  |
| 29.96726745                          | 0.817455852                    | -0.141265166                   | 2.946721049                                 | 0.380080575                  |
| 28.0048247                           | 0.922994016                    | -0.223282112                   | 3.46584136                                  | 0.342870344                  |
| 18.20173265                          | 0.785841379                    | -0.136255053                   | 2.505783452                                 | 0.408700598                  |
| 27.76402576                          | 0.888843127                    | -0.178341365                   | 4.091103584                                 | 0.307664705                  |
| 25.60335376                          | 0.856483241                    | -0.183581414                   | 1.977139571                                 | 0.497964913                  |
| 21.93648327                          | 0.843103185                    | -0.159674565                   | 2.959949443                                 | 0.376839243                  |
| 31.45200183                          | 0.843898904                    | -0.150062434                   | 3.952033934                                 | 0.30998459                   |
| 26.68181055                          | 0.85674404                     | -0.16538388                    | 2.760275221                                 | 0.421771757                  |
| 22.32508447                          | 0.777812844                    | -0.127919981                   | 2.728307453                                 | 0.39494082                   |
| 30.53591195                          | 0.820409495                    | -0.146888331                   | 3.009942699                                 | 0.392848428                  |
| 31.59061235                          | 0.839998573                    | -0.146930592                   | 3.560491719                                 | 0.337861201                  |
| 18.94483572                          | 0.978550142                    | -0.395596144                   | 3.616560609                                 | 0.32477898                   |
| 29.88826275                          | 0.941607523                    | -0.256129238                   | 3.669486224                                 | 0.330157984                  |
| 29.83814701                          | 0.829275042                    | -0.139335555                   | 3.783879966                                 | 0.322679343                  |
| 23.89155192                          | 0.823920111                    | -0.141337861                   | 3.370247695                                 | 0.356955759                  |
| 24.06062858                          | 0.846759209                    | -0.164288405                   | 2.473288844                                 | 0.416741584                  |
| 34.25614932                          | 0.89464676                     | -0.202865817                   | 2.99676718                                  | 0.384696459                  |
| 28.54952861                          | 0.868184776                    | -0.163307451                   | 3.705018971                                 | 0.332184671                  |
| 30.30223353                          | 0.845515582                    | -0.157963265                   | 2.909496826                                 | 0.394919728                  |
| 32.75923008                          | 0.892505006                    | -0.177928673                   | 4.364637581                                 | 0.293762835                  |
| 29.96765679                          | 0.834710079                    | -0.144896677                   | 3.917250891                                 | 0.312132456                  |
| 32.15784907                          | 0.897137865                    | -0.180327519                   | 4.24231407                                  | 0.298551817                  |
| 27.49055889                          | 0.844511136                    | -0.153782464                   | 3.232413613                                 | 0.362345651                  |
| 15.30703348                          | 0.799826018                    | -0.151758421                   | 2.218130089                                 | 0.456405482                  |
| 29.48088477                          | 0.813322197                    | -0.136316061                   | 2.923119572                                 | 0.379748535                  |
| 27.28967815                          | 0.9112381                      | -0.202888725                   | 3.995570027                                 | 0.30676285                   |
| 20.25028545                          | 0.967198545                    | -0.342717689                   | 3.457270605                                 | 0.330170283                  |
| 39.19895964                          | 0.949634608                    | -0.248664239                   | 4.610207804                                 | 0.287498761                  |
| 25.53731295                          | 0.825741867                    | -0.147419258                   | 2.835681582                                 | 0.396269643                  |
| 26.59324963                          | 0.860472461                    | -0.160755771                   | 4.224798374                                 | 0.296658604                  |
| 29.38424826                          | 0.78430202                     | -0.121958088                   | 3.469101338                                 | 0.353609834                  |
| 25.77881178                          | 0.885542526                    | -0.188780735                   | 3.026755669                                 | 0.364331738                  |
| 24.58043792                          | 0.84711458                     | -0.168775292                   | 2.523130532                                 | 0.464824302                  |
| 32.96075745                          | 0.871279842                    | -0.163538479                   | 4.335103952                                 | 0.293116178                  |
| 31.5963277                           | 0.80649872                     | -0.132038235                   | 4.165031386                                 | 0.305128347                  |
| 41.32635713                          | 0.876626759                    | -0.169171538                   | 3.901295407                                 | 0.323592937                  |
| 25.79711716                          | 0.897524962                    | -0.194074324                   | 3.145250491                                 | 0.360803599                  |
| 23.02335309                          | 0.856122332                    | -0.174803812                   | 3.052446875                                 | 0.353440258                  |
| 25.37278839                          | 0.817767735                    | -0.131200294                   | 3.943257488                                 | 0.31777492                   |
| 31.11225434                          | 0.829079837                    | -0.140461431                   | 3.99926212                                  | 0.356458463                  |
| 21.67634352                          | 0.804332888                    | -0.149872074                   | 2.320264508                                 | 0.445120373                  |
| 24.74398894                          | 0.837666532                    | -0.170861142                   | 2.228387277                                 | 0.472995276                  |
| 24.36438012                          | 0.961849109                    | -0.300914795                   | 3.994434978                                 | 0.305550247                  |
| 27.76887128                          | 0.846398031                    | -0.154578036                   | 3.264753361                                 | 0.360262105                  |
| 33.51934308                          | 0.957310259                    | -0.271956786                   | 4.473352763                                 | 0.292695948                  |
| 28.27692978                          | 0.822804767                    | -0.132873286                   | 3.881956288                                 | 0.333934112                  |
| 32.15742214                          | 0.938645635                    | -0.234784846                   | 4.757167253                                 | 0.272395117                  |
| 25.16460333                          | 0.832620388                    | -0.143860843                   | 3.387724516                                 | 0.35057943                   |
| 27.04693215                          | 0.813483443                    | -0.136227564                   | 3.682660124                                 | 0.341418241                  |
| 29.68313832                          | 0.877808592                    | -0.164823467                   | 4.271662112                                 | 0.297571406                  |
| 23.32925828                          | 0.784992831                    | -0.128106974                   | 2.884385326                                 | 0.401735602                  |
| 28.0891358                           | 0.799135458                    | -0.139208376                   | 2.503474427                                 | 0.434545371                  |
| 26.55367398                          | 0.833675471                    | -0.157614484                   | 2.375381575                                 | 0.453905436                  |
| 34.79930365                          | 0.881445284                    | -0.168516631                   | 4.605596644                                 | 0.284138839                  |
| 25.33816316                          | 0.855247609                    | -0.158566253                   | 3.622281495                                 | 0.326460464                  |
| 28.25727295                          | 0.919925921                    | -0.205304465                   | 4.552357812                                 | 0.2811712749                 |
| 22.29144856                          | 0.817481654                    | -0.138430018                   | 3.813785566                                 | 0.325244995                  |
| 32.55400964                          | 0.803567998                    | -0.13401003                    | 3.065275854                                 | 0.361439003                  |
| 32.16092125                          | 0.948591362                    | -0.245943343                   | 5.338491903                                 | 0.260614515                  |
| 29.3002737                           | 0.83796309                     | -0.145961437                   | 3.768953116                                 | 0.318665976                  |
| 32.98618727                          | 0.829454961                    | -0.144575933                   | 3.42862444                                  | 0.356866774                  |
| 17.74714132                          | 0.918250154                    | -0.255196762                   | 2.739559114                                 | 0.380831225                  |
| 23.1345999                           | 0.778626994                    | -0.127677115                   | 3.02666349                                  | 0.375519152                  |
| 26.42129422                          | 0.80770125                     | -0.146380152                   | 2.430963424                                 | 0.432183915                  |
| 27.47604259                          | 0.906802512                    | -0.192453521                   | 4.286246493                                 | 0.295880955                  |
| 45.58001892                          | 0.863409892                    | -0.149294614                   | 4.898151365                                 | 0.274256857                  |
| 25.03862476                          | 0.95893663                     | -0.324390296                   | 2.903432256                                 | 0.376281903                  |
| 17.93657094                          | 0.982267399                    | -0.424143722                   | 3.384510449                                 | 0.344631596                  |
| 35.70812883                          | 0.807517894                    | -0.134761756                   | 3.250207722                                 | 0.384987328                  |
| 23.66420383                          | 0.90480575                     | -0.189724491                   | 4.35017177                                  | 0.297119238                  |
| 17.93369678                          | 0.849462796                    | -0.174299709                   | 2.35556018                                  | 0.430215056                  |
| 23.9805877                           | 0.791985446                    | -0.132904279                   | 2.792125109                                 | 0.396032106                  |
| 21.60832328                          | 0.808745038                    | -0.141217231                   | 2.570772219                                 | 0.423578244                  |
| 37.46097077                          | 0.982308701                    | -0.354598847                   | 5.116412909                                 | 0.255940049                  |
| 30.78355464                          | 0.869592396                    | -0.166437698                   | 3.362500536                                 | 0.350498496                  |
| 15.47467567                          | 0.95612089                     | -0.313660064                   | 3.684216624                                 | 0.318381268                  |
| 25.54616813                          | 0.920208316                    | -0.23251352                    | 2.734939332                                 | 0.383762878                  |
| 27.40017105                          | 0.933640437                    | -0.232074617                   | 3.522867066                                 | 0.357149589                  |

| log.sigma.5.0.mm.3D_glcm_ClusterTendency | log.sigma.5.0.mm.3D_firstorder_InterquartileRange | log.sigma.5.0.mm.3D_firstorder_Skewness | log.sigma.5.0.mm.3D_firstorder_Uniformity |
|------------------------------------------|---------------------------------------------------|-----------------------------------------|-------------------------------------------|
| 136.0768818                              | 219.6123695                                       | 0.120951329                             | 0.043259315                               |
| 69.94907634                              | 137.5040092                                       | 0.40750604                              | 0.065741694                               |
| 57.85591961                              | 164.8047719                                       | 0.079767584                             | 0.063762237                               |
| 87.40225748                              | 187.4931297                                       | -0.029109475                            | 0.051829661                               |
| 156.8814724                              | 254.7696991                                       | -0.280485174                            | 0.043039703                               |
| 70.91078041                              | 180.5699253                                       | -0.250306282                            | 0.059231006                               |
| 48.62178628                              | 138.5425644                                       | 0.367886149                             | 0.080435682                               |
| 151.4552263                              | 257.1126137                                       | -0.072620929                            | 0.039430122                               |
| 123.0016042                              | 208.5134163                                       | 0.046497199                             | 0.044472069                               |
| 72.70136413                              | 157.3192997                                       | 0.416536791                             | 0.060361315                               |
| 86.24431354                              | 198.7477417                                       | -0.334381375                            | 0.053948582                               |
| 95.75201559                              | 186.5920124                                       | 0.2843724                               | 0.051836614                               |
| 98.15464292                              | 194.7957211                                       | 0.301138952                             | 0.051914738                               |
| 87.30180183                              | 186.1762714                                       | -0.346553961                            | 0.055075349                               |
| 86.94638405                              | 175.2731228                                       | 0.240667719                             | 0.054857029                               |
| 42.87561997                              | 70.00573921                                       | 0.283821473                             | 0.114485835                               |
| 106.8777708                              | 201.8516293                                       | -0.310035342                            | 0.050512722                               |
| 112.6684528                              | 211.4301205                                       | 0.393315475                             | 0.047070514                               |
| 129.8187762                              | 201.352541                                        | -0.700696167                            | 0.049178682                               |
| 51.87234528                              | 127.2696724                                       | 0.43075481                              | 0.073534328                               |
| 41.42297623                              | 116.679772                                        | 0.288918466                             | 0.079988198                               |
| 89.79074444                              | 178.9796371                                       | 0.301316371                             | 0.054969578                               |
| 70.17557982                              | 144.8784199                                       | 0.429094181                             | 0.065275601                               |
| 103.8507569                              | 212.9482346                                       | -0.262453677                            | 0.050790756                               |
| 42.37126185                              | 133.6559529                                       | 0.242680556                             | 0.073913367                               |
| 96.74874814                              | 193.9703732                                       | 0.203312469                             | 0.049622537                               |
| 46.49835262                              | 104.4119143                                       | 0.493344495                             | 0.08816634                                |
| 71.82309794                              | 157.7814772                                       | 0.283505268                             | 0.059912179                               |
| 104.8622492                              | 231.8777161                                       | -0.136852277                            | 0.047429961                               |
| 72.71285935                              | 150.8087027                                       | 0.095466876                             | 0.062200043                               |
| 56.23872421                              | 145.224103                                        | 0.502974604                             | 0.068355056                               |
| 80.58293337                              | 169.2838631                                       | 0.385560894                             | 0.058501347                               |
| 102.9058977                              | 207.5865479                                       | 0.059187086                             | 0.048112925                               |
| 70.30494649                              | 185.1525187                                       | 0.033857734                             | 0.065643491                               |
| 88.13946716                              | 163.6853809                                       | -0.489593732                            | 0.062146175                               |
| 101.0540267                              | 233.0982361                                       | -0.0636697                              | 0.048546711                               |
| 91.8845289                               | 195.9761391                                       | 0.550123604                             | 0.05388479                                |
| 67.8732641                               | 158.8791046                                       | -0.000856623                            | 0.062980718                               |
| 81.29910486                              | 139.0440788                                       | -0.622233997                            | 0.067813116                               |
| 95.42454419                              | 181.0796127                                       | 0.007067917                             | 0.051698426                               |
| 66.40704806                              | 139.1168194                                       | 0.296218658                             | 0.06500463                                |
| 134.3836991                              | 232.5514603                                       | -0.175306152                            | 0.043788379                               |
| 96.05783864                              | 223.6640415                                       | -0.181661331                            | 0.048947319                               |
| 138.0174106                              | 222.2899017                                       | -0.063746263                            | 0.042986794                               |
| 88.94402394                              | 188.3341866                                       | 0.25349964                              | 0.052949856                               |
| 42.11351419                              | 136.7990708                                       | 0.699704862                             | 0.079887445                               |
| 77.0671614                               | 167.0451393                                       | 0.143524845                             | 0.057191711                               |
| 102.1485766                              | 217.5864084                                       | -0.245117391                            | 0.04998985                                |
| 56.21776387                              | 150.1070023                                       | -0.171534705                            | 0.067052796                               |
| 150.3578733                              | 186.2359238                                       | -0.439762353                            | 0.049726933                               |
| 73.1441561                               | 165.9090109                                       | 0.315562148                             | 0.060509344                               |
| 96.69135332                              | 249.3593445                                       | -0.245576543                            | 0.05074942                                |
| 84.47285449                              | 173.8320847                                       | 0.446963385                             | 0.054562929                               |
| 68.72359661                              | 152.657505                                        | -0.200885641                            | 0.062502684                               |
| 61.84985111                              | 97.74832726                                       | 0.5852842                               | 0.089446842                               |
| 111.4513357                              | 208.2518902                                       | -0.128113955                            | 0.046014902                               |
| 98.49864929                              | 222.4855995                                       | 0.042394975                             | 0.046585028                               |
| 112.6895525                              | 175.1173553                                       | -0.484815969                            | 0.054585671                               |
| 93.09286126                              | 184.9770226                                       | 0.155060247                             | 0.054135552                               |
| 65.90491399                              | 166.2828903                                       | -0.189699461                            | 0.060955137                               |
| 109.1004042                              | 236.6766472                                       | 0.301665019                             | 0.046598106                               |
| 107.6997655                              | 192.6456394                                       | 0.316188585                             | 0.050419075                               |
| 45.63307273                              | 106.7251186                                       | 0.507816296                             | 0.083078937                               |
| 44.63327253                              | 113.2171402                                       | 0.672966029                             | 0.081212079                               |
| 94.71860243                              | 201.0679131                                       | 0.049333589                             | 0.053876702                               |
| 85.93199032                              | 178.5778275                                       | 0.474927646                             | 0.056122603                               |
| 136.9016252                              | 220.2075787                                       | -0.378451977                            | 0.045736814                               |
| 119.4318754                              | 217.3617401                                       | 0.223664608                             | 0.04628391                                |
| 125.5507102                              | 224.4404672                                       | -0.382500805                            | 0.047246074                               |
| 87.44209743                              | 187.1449356                                       | 0.36371477                              | 0.05429437                                |
| 97.76362143                              | 205.8982906                                       | 0.3398595                               | 0.050485197                               |
| 122.5025262                              | 240.7151413                                       | 0.030427151                             | 0.043239626                               |
| 65.9723477                               | 142.8408165                                       | 0.485033519                             | 0.064701943                               |
| 53.19775787                              | 135.7731361                                       | 0.404090105                             | 0.070206145                               |
| 65.02041925                              | 108.2778969                                       | 0.784486709                             | 0.078150664                               |
| 123.4717793                              | 246.3589745                                       | -0.074134821                            | 0.044123598                               |
| 87.41313292                              | 205.2604485                                       | -0.018451247                            | 0.051550507                               |
| 129.8303875                              | 237.3470917                                       | 0.00581008                              | 0.043418436                               |
| 94.30816118                              | 222.7717605                                       | 0.209606519                             | 0.049825561                               |
| 68.45327278                              | 168.353919                                        | 0.141887356                             | 0.059811727                               |
| 150.5463934                              | 263.6816201                                       | -0.196502055                            | 0.040320295                               |
| 96.30414927                              | 214.0492401                                       | -0.149412518                            | 0.050370882                               |
| 95.0849634                               | 185.2632217                                       | 0.393120174                             | 0.053924537                               |
| 33.1015742                               | 107.8496132                                       | -0.119907413                            | 0.091652794                               |
| 67.2508272                               | 168.6647911                                       | 0.438768865                             | 0.060177595                               |
| 57.18158055                              | 130.1759558                                       | 0.633201625                             | 0.073051888                               |
| 127.9170012                              | 232.4581881                                       | 0.178351759                             | 0.043668757                               |
| 154.0659947                              | 251.8365154                                       | -0.495136657                            | 0.041935414                               |
| 63.56063279                              | 204.8112144                                       | -0.073946758                            | 0.065902237                               |
| 63.57043062                              | 151.93153                                         | 0.413092701                             | 0.068662132                               |
| 80.67419128                              | 158.4637108                                       | 0.241280268                             | 0.058969123                               |
| 117.240193                               | 234.6254621                                       | 0.284854083                             | 0.044908474                               |
| 51.32086502                              | 142.2647018                                       | 0.317692943                             | 0.06924759                                |
| 63.79425275                              | 154.047905                                        | 0.3875691                               | 0.064098254                               |
| 62.3492422                               | 152.432518                                        | 0.259240289                             | 0.065017492                               |
| 183.302949                               | 286.4722633                                       | -0.463118051                            | 0.042072209                               |
| 93.15089772                              | 180.6121826                                       | -0.074088789                            | 0.051951231                               |
| 48.96989158                              | 168.2705173                                       | 0.055913983                             | 0.066693106                               |
| 69.8497848                               | 148.2780209                                       | -0.424168385                            | 0.065990908                               |
| 126.0421739                              | 194.7439384                                       | 0.286461075                             | 0.048760152                               |

| log.sigma.5.0.mm.3D_firstorder_MeanAbsoluteDeviation | log.sigma.5.0.mm.3D_firstorder_Energy | log.sigma.5.0.mm.3D_firstorder_RobustMeanAbsoluteDeviation | log.sigma.5.0.mm.3D_firstorder_Median |
|------------------------------------------------------|---------------------------------------|------------------------------------------------------------|---------------------------------------|
| 131.6622774                                          | 19821766.41                           | 91.80871193                                                | -31.01939392                          |
| 89.15507532                                          | 29796003.99                           | 58.2684631                                                 | -28.05907631                          |
| 91.43649137                                          | 8761082.96                            | 68.31192558                                                | -93.44990158                          |
| 109.472097                                           | 49060271.75                           | 77.92823243                                                | 15.35609245                           |
| 137.5188705                                          | 10255788.58                           | 101.4838749                                                | -20.16877747                          |
| 101.2904624                                          | 16596547.7                            | 73.76073119                                                | -88.4389267                           |
| 78.37516898                                          | 3345240.56                            | 56.73084056                                                | 7.901723862                           |
| 147.3193654                                          | 32866273.9                            | 107.8609513                                                | -15.09683466                          |
| 126.9176617                                          | 53754084.18                           | 89.03243638                                                | -32.94900131                          |
| 94.70086083                                          | 47824671.48                           | 66.55289994                                                | -45.93871689                          |
| 112.2729888                                          | 18729444.95                           | 83.08693495                                                | -41.31168747                          |
| 109.2645062                                          | 29201610.83                           | 78.4059867                                                 | -42.51844597                          |
| 110.5555468                                          | 37575504.06                           | 81.0325558                                                 | -0.436579436                          |
| 107.4586538                                          | 19024382.46                           | 78.31518731                                                | 5.306252241                           |
| 104.5149995                                          | 16945926.34                           | 72.59382649                                                | 34.99415207                           |
| 60.12074926                                          | 53671563.35                           | 32.95917114                                                | 3.650893211                           |
| 116.3853177                                          | 18053529.66                           | 82.16686109                                                | -56.26034164                          |
| 122.7088538                                          | 53568805.82                           | 88.12847091                                                | -33.7288208                           |
| 126.9119081                                          | 15015167.2                            | 86.18076436                                                | 38.09223366                           |
| 78.65803429                                          | 30104333.96                           | 53.07195949                                                | -22.13406944                          |
| 71.29741141                                          | 60458665.13                           | 48.49930769                                                | -62.18571472                          |
| 103.0559045                                          | 28281948.44                           | 73.55937793                                                | -8.104179859                          |
| 89.79137285                                          | 38857448.4                            | 60.76288896                                                | -45.74875259                          |
| 115.1128582                                          | 9288512.442                           | 86.49027274                                                | 33.73172379                           |
| 76.54833616                                          | 17536088.03                           | 55.21988162                                                | -78.15855789                          |
| 116.3788021                                          | 16028657.23                           | 83.18760882                                                | -62.39849091                          |
| 70.11590534                                          | 31793586.32                           | 44.58997542                                                | -21.40383148                          |
| 94.25829045                                          | 28289740.22                           | 66.06150765                                                | -81.28633118                          |
| 122.9562984                                          | 37477590.06                           | 94.19515338                                                | -10.09100437                          |
| 93.04095595                                          | 49422400.19                           | 63.22298019                                                | -69.61969757                          |
| 85.19879849                                          | 43707251.84                           | 59.79752637                                                | -61.30716705                          |
| 100.6001377                                          | 95854501.08                           | 70.36654432                                                | 0.640729547                           |
| 117.817669                                           | 42865848                              | 84.95536821                                                | -10.93474102                          |
| 100.1069567                                          | 1872327.89                            | 75.73295559                                                | 72.23913956                           |
| 100.4526253                                          | 5944453.633                           | 68.86567603                                                | -24.25758457                          |
| 121.2634647                                          | 44052043.57                           | 92.74445884                                                | -25.03794098                          |
| 110.3659432                                          | 55710166.12                           | 80.58752227                                                | -54.08483124                          |
| 91.91024599                                          | 42761188.59                           | 66.49908695                                                | 2.989079833                           |
| 96.46753222                                          | 13139973.61                           | 62.75031737                                                | 22.55182457                           |
| 111.1962787                                          | 22763906.24                           | 76.70581663                                                | -42.46776199                          |
| 89.51222892                                          | 21157611.6                            | 59.55049072                                                | -35.49675369                          |
| 135.7837035                                          | 27292454.49                           | 99.14709167                                                | -16.18147087                          |
| 120.0628746                                          | 37780293.47                           | 90.77550151                                                | -37.71664619                          |
| 133.4297333                                          | 28442727.44                           | 94.78161941                                                | -10.77713203                          |
| 108.6877558                                          | 33583318.18                           | 78.37035886                                                | -12.15401316                          |
| 78.47829285                                          | 23305198.15                           | 56.41243384                                                | -57.17102623                          |
| 98.29309424                                          | 64124343.44                           | 69.25700593                                                | 7.791370869                           |
| 118.8406028                                          | 18151247.23                           | 88.12094608                                                | -84.70782471                          |
| 86.79715173                                          | 1550813.138                           | 61.92411455                                                | 15.28323603                           |
| 127.567248                                           | 14161392.45                           | 81.48537812                                                | 20.65718651                           |
| 94.38899057                                          | 48613312.94                           | 66.57837874                                                | -14.55650902                          |
| 125.802594                                           | 27899669.12                           | 100.1286994                                                | -100.2201843                          |
| 105.2401311                                          | 68879297.85                           | 72.18770742                                                | -28.43455124                          |
| 91.98975148                                          | 7979430.972                           | 63.48802589                                                | -1.628923893                          |
| 75.38094109                                          | 72002900.15                           | 45.36803513                                                | -6.243593216                          |
| 125.2545526                                          | 24036372.02                           | 89.99216885                                                | -50.71207428                          |
| 122.0287862                                          | 53016349.65                           | 90.95335981                                                | -48.25421524                          |
| 114.4453011                                          | 28763765.67                           | 75.88729576                                                | 0.312221944                           |
| 106.2877617                                          | 18800157.03                           | 74.91891116                                                | -76.89801025                          |
| 93.60996926                                          | 12693364.09                           | 67.88675154                                                | -27.65908241                          |
| 126.6213579                                          | 51060313.19                           | 96.02401775                                                | -43.20464325                          |
| 112.7296175                                          | 111397737.1                           | 78.35003355                                                | -1.522044361                          |
| 70.48225975                                          | 27273390.75                           | 46.01226046                                                | 10.70008135                           |
| 74.25625104                                          | 26727873.4                            | 49.38819492                                                | -33.82705688                          |
| 112.2479864                                          | 4876906.05                            | 81.07733406                                                | -54.55591583                          |
| 104.2785196                                          | 27806714.85                           | 73.24674597                                                | 16.93308258                           |
| 130.0636441                                          | 11069443.58                           | 89.62401833                                                | -19.46465111                          |
| 124.6216056                                          | 76363327.79                           | 88.96756425                                                | -0.822728455                          |
| 131.414993                                           | 17187713.22                           | 92.28326297                                                | -81.35189438                          |
| 105.6558527                                          | 34640908.83                           | 76.13548683                                                | -29.03917122                          |
| 115.2249573                                          | 60745475.77                           | 84.41021297                                                | -40.23618317                          |
| 132.1277932                                          | 31903154.9                            | 97.89217695                                                | -44.7742157                           |
| 88.45169698                                          | 67200411.8                            | 60.63755822                                                | -23.87006283                          |
| 81.51659041                                          | 76700359.03                           | 57.31292055                                                | -39.06919098                          |
| 80.30265938                                          | 112122012                             | 49.22081214                                                | 4.319744349                           |
| 133.663802                                           | 33430173.83                           | 97.82504882                                                | -48.31993866                          |
| 112.5060663                                          | 27109677.42                           | 85.28372437                                                | -72.18600464                          |
| 133.4847934                                          | 18996752.87                           | 98.60968885                                                | -74.15685654                          |
| 116.9773778                                          | 49790154.72                           | 88.90229674                                                | -103.1020737                          |
| 95.21676089                                          | 46040125.66                           | 69.38512018                                                | -57.33372116                          |
| 149.5564089                                          | 29046366.69                           | 108.7915856                                                | -136.2050552                          |
| 115.1609014                                          | 2722225.08                            | 86.8257428                                                 | -28.12976456                          |
| 107.4108582                                          | 53563832.18                           | 73.61729765                                                | 14.28766632                           |
| 66.4546748                                           | 1080759.584                           | 46.84879267                                                | 19.32926941                           |
| 95.58326917                                          | 46739405.95                           | 69.16611627                                                | -7.600265503                          |
| 82.12625257                                          | 59985905.19                           | 56.08122003                                                | -23.79539776                          |
| 132.7628722                                          | 22355583.64                           | 98.50064532                                                | -52.91953659                          |
| 143.210231                                           | 53196953.32                           | 104.0631863                                                | -32.94246101                          |
| 101.7829806                                          | 2643179.638                           | 78.59983042                                                | -33.0421524                           |
| 90.83132689                                          | 1417499.355                           | 60.46864993                                                | -21.44186974                          |
| 99.63034328                                          | 68079865.91                           | 65.84976169                                                | -14.62581825                          |
| 128.4654684                                          | 24263988.9                            | 94.73248338                                                | -102.3812752                          |
| 81.23807405                                          | 13651150.26                           | 58.29311345                                                | -62.34408569                          |
| 90.27733631                                          | 56333061.69                           | 63.7520366                                                 | -37.06498909                          |
| 89.6907381                                           | 72439552.13                           | 64.47516983                                                | -6.68351984                           |
| 163.0906096                                          | 11916042.48                           | 122.2086213                                                | -61.67111206                          |
| 109.8204511                                          | 22461696.4                            | 77.52083103                                                | 6.739589453                           |
| 88.94305265                                          | 1460597.674                           | 66.85861674                                                | 24.39482117                           |
| 88.66626271                                          | 4691539.169                           | 63.06683008                                                | 29.49085045                           |
| 122.6264747                                          | 22470325.98                           | 84.08130704                                                | -60.00167465                          |

| log.sigma.5.0.mm.3D_firstorder_TotalEnergy | log.sigma.5.0.mm.3D_firstorder_Maximum | log.sigma.5.0.mm.3D_firstorder_RootMeanSquared | log.sigma.5.0.mm.3D_firstorder_90Percentile | log.sigma.5.0.mm.3D_firstorder_Minimum |
|--------------------------------------------|----------------------------------------|------------------------------------------------|---------------------------------------------|----------------------------------------|
| 535187693                                  | 398.1594238                            | 167.1594115                                    | 183.4881897                                 | -407.9721069                           |
| 804492107.6                                | 371.9824829                            | 119.7735063                                    | 122.4983841                                 | -329.9846191                           |
| 236549239.9                                | 174.0602417                            | 142.0803544                                    | 62.61198349                                 | -356.6549988                           |
| 1324627337                                 | 420.4545898                            | 136.4503535                                    | 191.2645721                                 | -420.552887                            |
| 276906291.7                                | 296.5324097                            | 169.0196918                                    | 198.1220459                                 | -458.6394348                           |
| 448106788                                  | 214.1236877                            | 160.6583835                                    | 40.32708511                                 | -400.5035706                           |
| 90321495.13                                | 246.5287323                            | 99.63197204                                    | 169.4770538                                 | -166.2814789                           |
| 887389395.4                                | 408.2093201                            | 181.1095595                                    | 200.5433884                                 | -446.8782349                           |
| 1451360273                                 | 412.8890076                            | 160.7972025                                    | 182.9411774                                 | -475.4846802                           |
| 1291266130                                 | 379.0649109                            | 124.2468225                                    | 126.3159233                                 | -344.0827332                           |
| 505695013.7                                | 258.7205811                            | 150.4907127                                    | 95.73009644                                 | -407.4573364                           |
| 788443492.5                                | 390.8519592                            | 140.3716169                                    | 145.0425644                                 | -332.4332275                           |
| 1014538610                                 | 363.7368469                            | 134.600921                                     | 190.1280579                                 | -263.0894775                           |
| 513658326.3                                | 296.261261                             | 130.4470861                                    | 146.6594894                                 | -382.8499146                           |
| 457540011.2                                | 457.1081848                            | 136.3871545                                    | 192.442688                                  | -307.5517273                           |
| 1449132211                                 | 413.6767883                            | 87.8968828                                     | 112.0473602                                 | -351.8797913                           |
| 487445300.8                                | 284.5861206                            | 160.8249224                                    | 104.7923325                                 | -449.6646118                           |
| 1446357757                                 | 437.786499                             | 151.5624823                                    | 196.0738373                                 | -335.1509705                           |
| 405409514.3                                | 330.7303772                            | 160.6214691                                    | 198.1971466                                 | -474.4384766                           |
| 812817017                                  | 340.6596985                            | 103.6711598                                    | 111.7461853                                 | -265.7367554                           |
| 1632383959                                 | 332.4829712                            | 107.5790471                                    | 64.04805489                                 | -368.5857239                           |
| 763612607.5                                | 485.8036804                            | 128.2302354                                    | 164.0655151                                 | -322.1489258                           |
| 1049151107                                 | 384.8393555                            | 119.2823782                                    | 126.7756271                                 | -376.3655396                           |
| 250789835.9                                | 312.4599915                            | 138.9634365                                    | 191.969574                                  | -324.3959656                           |
| 473474376.8                                | 220.779068                             | 120.68495                                      | 53.37378044                                 | -276.3450928                           |
| 432773745.3                                | 364.5209961                            | 151.9738395                                    | 144.2221939                                 | -384.0940857                           |
| 858426830.5                                | 369.3963928                            | 95.7757321                                     | 110.0454941                                 | -310.7468567                           |
| 763822985.9                                | 313.8582764                            | 140.5048723                                    | 83.95223999                                 | -329.7859192                           |
| 1011894932                                 | 310.2831726                            | 145.7180911                                    | 169.924765                                  | -385.8077698                           |
| 1334404805                                 | 326.986969                             | 139.435752                                     | 71.55333481                                 | -396.3745117                           |
| 1180095800                                 | 341.7412415                            | 117.2550311                                    | 90.34071808                                 | -301.651886                            |
| 2588071529                                 | 504.6586914                            | 127.1390344                                    | 193.3702301                                 | -327.5950928                           |
| 1157377896                                 | 395.9094543                            | 145.206822                                     | 168.3874023                                 | -384.9477234                           |
| 50552853.04                                | 300.2579346                            | 134.1758279                                    | 225.3003616                                 | -172.1832428                           |
| 160500248.1                                | 243.0044556                            | 133.8094945                                    | 95.2542717                                  | -414.2804871                           |
| 1189405176                                 | 339.8654785                            | 147.6751244                                    | 143.6584335                                 | -391.5691528                           |
| 1504174485                                 | 505.5345459                            | 139.0820178                                    | 147.9699448                                 | -318.2186584                           |
| 1154552092                                 | 308.5236816                            | 112.9128463                                    | 134.9955673                                 | -291.2206421                           |
| 354779287.6                                | 356.5192871                            | 125.4451886                                    | 133.2675446                                 | -404.6130371                           |
| 614625468.6                                | 370.1736145                            | 147.3111602                                    | 132.6489136                                 | -383.4190674                           |
| 571255513.3                                | 500.2965393                            | 119.8076579                                    | 126.2181595                                 | -382.3634644                           |
| 736896271.3                                | 362.5746765                            | 169.229023                                     | 171.088089                                  | -436.8304138                           |
| 1020067924                                 | 304.6922302                            | 151.6862054                                    | 121.5473999                                 | -402.9432373                           |
| 767953641                                  | 386.1714783                            | 166.5803181                                    | 196.7483398                                 | -424.3597717                           |
| 906749591                                  | 364.7976074                            | 133.7254316                                    | 165.0420975                                 | -335.0354309                           |
| 629240350.1                                | 358.134613                             | 102.2748395                                    | 104.5012527                                 | -218.5806122                           |
| 1731357273                                 | 419.3085938                            | 122.6029839                                    | 169.5204849                                 | -388.1012573                           |
| 490083675.1                                | 233.3429413                            | 176.4489014                                    | 68.18047485                                 | -439.965271                            |
| 41871954.73                                | 230.5424805                            | 107.5789588                                    | 157.6324158                                 | -233.4862061                           |
| 382357596.2                                | 476.0808411                            | 168.8009105                                    | 207.3927826                                 | -488.6722107                           |
| 1312559449                                 | 397.1264648                            | 119.1545776                                    | 140.1997711                                 | -314.5205688                           |
| 753291066.3                                | 165.9445343                            | 183.6736141                                    | 66.46630554                                 | -428.4102783                           |
| 1859741042                                 | 496.6290588                            | 134.2628423                                    | 159.975235                                  | -355.0317993                           |
| 215444636.2                                | 320.0254211                            | 116.196279                                     | 148.4840698                                 | -321.3477173                           |
| 1944078304                                 | 407.4779053                            | 106.0633648                                    | 137.7797089                                 | -298.3385315                           |
| 648982044.6                                | 375.0443115                            | 165.3636391                                    | 136.719812                                  | -454.4836426                           |
| 1431441441                                 | 351.0911255                            | 155.4839607                                    | 139.5878693                                 | -446.1661072                           |
| 776621673.1                                | 432.7358704                            | 149.1501205                                    | 141.4377289                                 | -534.843689                            |
| 507604239.9                                | 297.9707336                            | 151.9737346                                    | 105.0514282                                 | -377.8724365                           |
| 342720830.5                                | 233.3171844                            | 120.032932                                     | 110.5937653                                 | -312.7480164                           |
| 1378628456                                 | 457.5341187                            | 152.2302149                                    | 173.7787994                                 | -439.6297913                           |
| 3007738903                                 | 507.443634                             | 142.6025102                                    | 181.081456                                  | -368.0835571                           |
| 736381550.1                                | 414.3852844                            | 93.94860322                                    | 130.0318222                                 | -242.5188141                           |
| 721652581.7                                | 313.8302307                            | 98.92848372                                    | 113.3873444                                 | -310.9238892                           |
| 131676463.3                                | 270.282074                             | 149.9140468                                    | 115.0955551                                 | -372.3064575                           |
| 750781300.8                                | 459.2610474                            | 133.8101673                                    | 218.4653992                                 | -275.6763916                           |
| 298874976.7                                | 317.6845703                            | 167.6157346                                    | 169.3383804                                 | -459.6026611                           |
| 2061809850                                 | 447.1474609                            | 154.5507457                                    | 203.8417206                                 | -345.161438                            |
| 464068256.9                                | 236.4366455                            | 196.309637                                     | 85.7385025                                  | -523.5387573                           |
| 935304538.5                                | 383.8950806                            | 131.2467638                                    | 163.6076202                                 | -302.2322083                           |
| 1640127846                                 | 439.9500122                            | 141.3579301                                    | 173.8891266                                 | -346.3918457                           |
| 861385182.3                                | 344.0638123                            | 168.1008252                                    | 158.1242065                                 | -415.0268555                           |
| 1814411118                                 | 444.4550781                            | 114.0314678                                    | 134.9490082                                 | -275.4103699                           |
| 2070909694                                 | 375.1882019                            | 106.8669352                                    | 106.2262535                                 | -350.8617554                           |
| 3027294324                                 | 455.2832947                            | 110.515731                                     | 165.3986191                                 | -284.879303                            |
| 902614693.4                                | 450.3404846                            | 173.0761477                                    | 130.1026382                                 | -493.2848816                           |
| 731961290.3                                | 348.3182373                            | 155.7885691                                    | 91.5904007                                  | -379.3166504                           |
| 512912327.5                                | 346.383728                             | 176.4715779                                    | 143.0294128                                 | -415.5417175                           |
| 1344334177                                 | 321.7208252                            | 168.0050931                                    | 97.58599548                                 | -317.9139404                           |
| 1243083393                                 | 315.9849548                            | 127.1893659                                    | 106.1434326                                 | -447.2855225                           |
| 784251900.6                                | 278.2954102                            | 240.0659908                                    | 60.79467773                                 | -559.2689209                           |
| 735000077.1                                | 377.0725098                            | 142.4778724                                    | 135.3867188                                 | -389.8057251                           |
| 1446223469                                 | 476.4621887                            | 138.5090381                                    | 204.2701462                                 | -360.1842651                           |
| 29180508.78                                | 219.8858185                            | 86.33373833                                    | 142.3398804                                 | -195.0445557                           |
| 1261963961                                 | 422.511322                             | 117.4025958                                    | 170.0777588                                 | -274.9756165                           |
| 1619619440                                 | 365.8861084                            | 104.66293                                      | 143.2728729                                 | -301.8298035                           |
| 603600758.2                                | 407.6058044                            | 169.5130772                                    | 167.0437759                                 | -390.9030762                           |
| 1436317740                                 | 287.6853027                            | 185.1388329                                    | 144.169754                                  | -635.0585938                           |
| 71365850.23                                | 186.8864441                            | 120.1815484                                    | 142.2904785                                 | -323.1766663                           |
| 38272482.57                                | 275.5072327                            | 116.1894739                                    | 150.1801697                                 | -245.5810852                           |
| 1838156380                                 | 426.5775146                            | 130.870204                                     | 160.1029846                                 | -431.3642578                           |
| 655127700.2                                | 404.2454529                            | 185.3867747                                    | 107.3344574                                 | -395.4390259                           |
| 368591856.9                                | 231.849411                             | 115.5754354                                    | 82.9941658                                  | -266.4323425                           |
| 1520992666                                 | 393.0995178                            | 117.3599792                                    | 107.7804237                                 | -316.6188049                           |
| 1955867908                                 | 376.2067871                            | 111.6990199                                    | 132.1532745                                 | -260.964447                            |
| 321733147                                  | 265.1311035                            | 217.0229991                                    | 133.4469818                                 | -553.501709                            |
| 606465802.9                                | 333.4066467                            | 135.9109628                                    | 187.4663239                                 | -374.5265808                           |
| 39436137.21                                | 244.2566376                            | 108.9714542                                    | 170.0521729                                 | -161.5878296                           |
| 126671557.6                                | 262.9585876                            | 111.2597471                                    | 156.72612                                   | -285.7202148                           |
| 606698801.6                                | 411.0315552                            | 166.8660244                                    | 130.9079559                                 | -388.8544312                           |

| log.sigma.5.0.mm.3D_firstorder_Entropy | log.sigma.5.0.mm.3D_firstorder_StandardDeviation | log.sigma.5.0.mm.3D_firstorder_Range | log.sigma.5.0.mm.3D_firstorder_Variance | log.sigma.5.0.mm.3D_firstorder_10Percentile |
|----------------------------------------|--------------------------------------------------|--------------------------------------|-----------------------------------------|---------------------------------------------|
| 4.71675895                             | 164.8616981                                      | 806.1315308                          | 27179.37952                             | -247.793663                                 |
| 4.220169579                            | 116.7880183                                      | 701.9671021                          | 13639.44121                             | -174.1885315                                |
| 4.105607161                            | 109.1845425                                      | 530.7152405                          | 11921.26431                             | -229.739711                                 |
| 4.467934756                            | 135.3198175                                      | 841.0074768                          | 18311.45302                             | -160.4125488                                |
| 4.676502787                            | 167.8778154                                      | 755.1718445                          | 28182.96092                             | -256.8691589                                |
| 4.260634897                            | 123.0171945                                      | 614.6272583                          | 15133.23014                             | -286.3509094                                |
| 3.843286563                            | 96.27781103                                      | 412.8102112                          | 9269.416897                             | -92.7213623                                 |
| 4.81746739                             | 178.6512852                                      | 855.0875549                          | 31916.2817                              | -278.5601532                                |
| 4.678418399                            | 157.9651406                                      | 888.3736877                          | 24952.98564                             | -239.4741791                                |
| 4.253190837                            | 118.289559                                       | 723.147644                           | 13992.41976                             | -182.9445969                                |
| 4.387852159                            | 135.2908869                                      | 666.1779175                          | 18303.62409                             | -265.2539551                                |
| 4.433685718                            | 134.7362313                                      | 723.2851868                          | 18153.85202                             | -218.929364                                 |
| 4.408385768                            | 134.5632789                                      | 626.8263245                          | 18107.27603                             | -172.2435272                                |
| 4.367880499                            | 130.1691767                                      | 679.1111755                          | 16944.01456                             | -194.2459518                                |
| 4.414550751                            | 131.5216955                                      | 764.6599121                          | 17297.95639                             | -131.534256                                 |
| 3.669876176                            | 87.51321217                                      | 765.5565796                          | 7658.562304                             | -94.45500031                                |
| 4.504423516                            | 143.7132154                                      | 734.2507324                          | 20653.48828                             | -275.596669                                 |
| 4.587347326                            | 150.4911827                                      | 772.9374695                          | 22647.59608                             | -199.1963531                                |
| 4.592726471                            | 160.2814998                                      | 805.1688538                          | 25690.15916                             | -229.6776367                                |
| 4.016911719                            | 101.7052967                                      | 606.3964539                          | 10343.96737                             | -151.8186798                                |
| 3.902849467                            | 91.17261752                                      | 701.0686951                          | 8312.446186                             | -167.7809723                                |
| 4.366068216                            | 128.2125445                                      | 807.9526062                          | 16438.45658                             | -171.3127243                                |
| 4.208778245                            | 114.7267426                                      | 761.204895                           | 13162.22547                             | -165.9628906                                |
| 4.426426537                            | 137.3491673                                      | 636.855957                           | 18864.79376                             | -169.8009644                                |
| 3.922075724                            | 94.14938889                                      | 497.1241608                          | 8864.107429                             | -197.0265366                                |
| 4.511312618                            | 142.5368017                                      | 748.6150818                          | 20316.73984                             | -236.0134399                                |
| 3.880927092                            | 94.39903727                                      | 680.1432495                          | 8911.178237                             | -128.3826675                                |
| 4.24987782                             | 117.9373059                                      | 643.6441956                          | 13909.20813                             | -228.9649597                                |
| 4.513526322                            | 145.0251246                                      | 696.0909424                          | 21032.28676                             | -215.3899689                                |
| 4.265094445                            | 118.2503902                                      | 723.3614807                          | 13983.15479                             | -227.3961853                                |
| 4.092991839                            | 106.3216114                                      | 643.3931274                          | 11304.28506                             | -175.0618011                                |
| 4.338068701                            | 125.6886136                                      | 832.2537842                          | 15797.62758                             | -135.254761                                 |
| 4.549475317                            | 144.6031359                                      | 780.8571777                          | 20910.06692                             | -205.0505005                                |
| 4.084217244                            | 118.2201796                                      | 472.4411774                          | 13976.01085                             | -99.01577606                                |
| 4.275197514                            | 126.4668554                                      | 657.2849426                          | 15993.86551                             | -226.6750916                                |
| 4.498057354                            | 143.5864028                                      | 731.4346313                          | 20617.05507                             | -236.2538132                                |
| 4.39434834                             | 134.5979076                                      | 823.7532043                          | 18116.59674                             | -196.432254                                 |
| 4.169531883                            | 112.6902127                                      | 599.7443237                          | 12699.08404                             | -165.2334946                                |
| 4.242268533                            | 125.4402141                                      | 761.1323242                          | 15735.24731                             | -177.8727631                                |
| 4.483219965                            | 140.1673133                                      | 753.5926819                          | 19646.87573                             | -243.7946686                                |
| 4.217850134                            | 116.0776432                                      | 882.6600037                          | 13474.01925                             | -175.8547256                                |
| 4.687767933                            | 165.2088279                                      | 799.4050903                          | 27293.95682                             | -275.7666443                                |
| 4.484378797                            | 142.752588                                       | 707.6354675                          | 20378.30137                             | -256.4671631                                |
| 4.719335408                            | 165.1357147                                      | 810.53125                            | 27269.80427                             | -256.523822                                 |
| 4.414163436                            | 133.2402304                                      | 699.8330383                          | 17752.959                               | -182.4389984                                |
| 3.868019459                            | 96.06455497                                      | 576.7152522                          | 9228.398722                             | -142.5207092                                |
| 4.327391341                            | 122.3765071                                      | 717.4098511                          | 14976.00948                             | -152.1025085                                |
| 4.475350511                            | 142.7678911                                      | 673.3082123                          | 20382.67074                             | -308.1835938                                |
| 4.05809638                             | 106.5680052                                      | 464.0286865                          | 11356.73973                             | -120.490696                                 |
| 4.670735559                            | 168.7446733                                      | 964.7530518                          | 28474.76477                             | -235.3961853                                |
| 4.253180154                            | 118.3983434                                      | 711.6470337                          | 14018.16771                             | -165.3730911                                |
| 4.390428195                            | 145.4918908                                      | 594.3548126                          | 21167.8903                              | -328.2681152                                |
| 4.424204553                            | 133.2249575                                      | 851.6608582                          | 17748.88931                             | -182.4133453                                |
| 4.224649318                            | 116.1870055                                      | 641.3731384                          | 13499.42024                             | -158.9726563                                |
| 3.954378459                            | 104.9568775                                      | 705.8164368                          | 11015.94614                             | -138.2157013                                |
| 4.612420659                            | 153.7658127                                      | 829.5279541                          | 23643.92516                             | -274.0726135                                |
| 4.562319396                            | 146.5303707                                      | 797.2572327                          | 21471.14952                             | -250.2404602                                |
| 4.516925667                            | 147.1943396                                      | 967.5795593                          | 21666.17362                             | -234.9961792                                |
| 4.404035794                            | 132.4177824                                      | 675.8431702                          | 17534.4691                              | -249.6004456                                |
| 4.188524122                            | 114.0875282                                      | 555.0652008                          | 13015.9641                              | -202.4118195                                |
| 4.552164739                            | 151.1031941                                      | 807.1639099                          | 22832.17526                             | -226.1319                                   |
| 4.52994779                             | 142.5719384                                      | 875.5271912                          | 20326.75761                             | -181.4474258                                |
| 3.890983705                            | 93.16257874                                      | 656.9040985                          | 8679.266078                             | -109.4774772                                |
| 3.898849296                            | 95.93974792                                      | 624.7541199                          | 9204.43523                              | -136.046402                                 |
| 4.38091854                             | 137.7893131                                      | 642.5885315                          | 18985.8948                              | -243.6005493                                |
| 4.367287761                            | 129.6435496                                      | 734.937439                           | 16807.44994                             | -124.4810745                                |
| 4.664508815                            | 163.739724                                       | 777.2872314                          | 26810.69722                             | -269.5338074                                |
| 4.606941815                            | 154.5225484                                      | 792.3088989                          | 23877.21797                             | -213.3364486                                |
| 4.622865727                            | 162.2765717                                      | 759.9754028                          | 26333.68571                             | -347.1871796                                |
| 4.379001424                            | 129.9471394                                      | 686.1272888                          | 16886.25905                             | -180.874649                                 |
| 4.476390413                            | 139.7458476                                      | 786.3418579                          | 19528.90193                             | -194.4697418                                |
| 4.665856985                            | 159.585794                                       | 759.0906677                          | 25467.62565                             | -272.88125                                  |
| 4.181418145                            | 112.6928084                                      | 719.865448                           | 12699.66906                             | -159.8112503                                |
| 4.03411735                             | 101.6363517                                      | 726.0499573                          | 10329.94799                             | -161.7258072                                |
| 4.060521298                            | 109.4127773                                      | 740.1625977                          | 11971.15584                             | -113.5671043                                |
| 4.697053315                            | 163.0462318                                      | 943.6253662                          | 26584.07369                             | -279.6516113                                |
| 4.397468521                            | 133.5861182                                      | 727.6348877                          | 17845.25097                             | -267.0236145                                |
| 4.666093669                            | 161.6430459                                      | 761.9254456                          | 26128.4743                              | -293.0070587                                |
| 4.441504963                            | 138.9064286                                      | 693.6347656                          | 19294.9959                              | -270.4937317                                |
| 4.24416102                             | 116.27517                                        | 763.2704773                          | 13519.91516                             | -194.4121857                                |
| 4.810545625                            | 181.8604636                                      | 837.5643311                          | 33073.22823                             | -426.4947723                                |
| 4.439150522                            | 137.3480516                                      | 766.8782349                          | 18864.48728                             | -225.360611                                 |
| 4.450824751                            | 136.6519099                                      | 836.6464539                          | 18673.74447                             | -149.3887711                                |
| 3.675787262                            | 82.13914637                                      | 414.9303741                          | 6746.839367                             | -78.67941284                                |
| 4.229474783                            | 117.2543956                                      | 697.4869385                          | 13748.59328                             | -137.4664917                                |
| 4.038278867                            | 104.3685666                                      | 667.7159119                          | 10892.7977                              | -125.7950172                                |
| 4.654322041                            | 160.3800191                                      | 798.5088806                          | 25721.75054                             | -266.0393768                                |
| 4.756286928                            | 174.0003324                                      | 922.7438965                          | 30276.11568                             | -327.9045197                                |
| 4.084007434                            | 118.8114667                                      | 510.0631104                          | 14116.16462                             | -161.54086                                  |
| 4.087594227                            | 115.3749442                                      | 521.0883179                          | 13311.37775                             | -160.7147095                                |
| 4.391268598                            | 130.3780382                                      | 857.9417725                          | 16998.43284                             | -176.0264832                                |
| 4.599345233                            | 155.8645443                                      | 799.6844788                          | 24293.75618                             | -309.4385681                                |
| 4.008325549                            | 100.3544336                                      | 498.2817535                          | 10071.01235                             | -187.2886917                                |
| 4.177940995                            | 112.447113                                       | 709.7183228                          | 12644.35322                             | -171.6420731                                |
| 4.145859223                            | 111.0870444                                      | 637.1712341                          | 12340.33143                             | -159.830307                                 |
| 4.758199165                            | 194.6485182                                      | 818.6328125                          | 37888.04564                             | -393.7610168                                |
| 4.451146415                            | 135.9107817                                      | 707.9332275                          | 18471.74059                             | -174.4971771                                |
| 3.982319974                            | 105.7617336                                      | 405.8444672                          | 11185.5443                              | -123.9071655                                |
| 4.102362234                            | 109.3364707                                      | 548.6788025                          | 11954.46382                             | -128.1581085                                |
| 4.598262192                            | 155.6185102                                      | 799.8859863                          | 24217.12072                             | -269.3591064                                |

| log.sigma.5.0.mm.3D_firstorder_Kurtosis | log.sigma.5.0.mm.3D_firstorder_Mean | log.sigma.5.0.mm.3D_glrIm_ShortRunLowGrayLevelEmphasis | log.sigma.5.0.mm.3D_glrIm_GrayLevelVariance |
|-----------------------------------------|-------------------------------------|--------------------------------------------------------|---------------------------------------------|
| 2.642985203                             | -29.94623294                        | 0.010907196                                            | 43.77605243                                 |
| 3.551931992                             | -26.57539487                        | 0.009782974                                            | 23.05466187                                 |
| 2.297620778                             | -90.91514057                        | 0.014599635                                            | 19.24813611                                 |
| 2.713770742                             | 17.52843236                         | 0.004705649                                            | 29.86074673                                 |
| 2.376066301                             | -19.61365088                        | 0.008772254                                            | 45.07222737                                 |
| 2.450924938                             | -103.3338572                        | 0.01328713                                             | 24.24775948                                 |
| 2.355915609                             | 25.63421455                         | 0.038331032                                            | 14.93708077                                 |
| 2.365523614                             | -29.73870971                        | 0.010904136                                            | 50.98110896                                 |
| 2.670106363                             | -30.04587666                        | 0.004919447                                            | 40.31179032                                 |
| 2.883550323                             | -38.01122404                        | 0.009683438                                            | 22.85271941                                 |
| 2.329828964                             | -65.90774243                        | 0.011167727                                            | 29.56437983                                 |
| 2.667200015                             | -39.37434224                        | 0.013703033                                            | 29.38416272                                 |
| 2.482445294                             | 3.183065116                         | 0.022673033                                            | 29.0352783                                  |
| 2.513091195                             | -8.510446708                        | 0.007704801                                            | 27.32189388                                 |
| 3.111241215                             | 36.10400987                         | 0.00897249                                             | 28.23828217                                 |
| 5.196242678                             | 8.203639553                         | 0.004655435                                            | 14.33210418                                 |
| 2.682541917                             | -72.18841591                        | 0.015546929                                            | 32.80835882                                 |
| 2.660283538                             | -17.98860608                        | 0.014831255                                            | 36.76203822                                 |
| 3.035122787                             | 10.44495986                         | 0.009174065                                            | 41.90299259                                 |
| 3.29586227                              | -20.09333244                        | 0.015904389                                            | 17.26329101                                 |
| 3.34527484                              | -57.10346031                        | 0.007513997                                            | 14.0577325                                  |
| 2.956765925                             | -2.129953277                        | 0.011190731                                            | 26.50483526                                 |
| 3.308542023                             | -32.65057864                        | 0.006334227                                            | 21.62889995                                 |
| 2.261447485                             | 21.11972828                         | 0.017899965                                            | 30.51502271                                 |
| 2.592969688                             | -75.50330946                        | 0.02125861                                             | 14.36026034                                 |
| 2.56351201                              | -52.71914308                        | 0.012654612                                            | 32.75682529                                 |
| 3.880862236                             | -16.18062487                        | 0.009454533                                            | 15.84834693                                 |
| 2.737437578                             | -76.3702233                         | 0.018783969                                            | 22.56732517                                 |
| 2.121575557                             | -14.1942                            | 0.008588853                                            | 33.64484026                                 |
| 3.146721765                             | -73.88622443                        | 0.01266109                                             | 23.61584968                                 |
| 3.157942999                             | -49.44145291                        | 0.011891978                                            | 18.38618344                                 |
| 2.926803433                             | 19.14958226                         | 0.006396254                                            | 26.13645484                                 |
| 2.553619002                             | -13.22702654                        | 0.008466386                                            | 33.87105866                                 |
| 2.060983345                             | 63.45976629                         | 0.043215833                                            | 22.71009805                                 |
| 2.924346281                             | -43.7163049                         | 0.011024107                                            | 26.00740052                                 |
| 2.191211542                             | -34.50923481                        | 0.009746306                                            | 33.12214976                                 |
| 2.882107288                             | -35.03157065                        | 0.01437421                                             | 29.49561773                                 |
| 2.501795509                             | -7.087087256                        | 0.012847475                                            | 20.58986149                                 |
| 3.620810922                             | -1.117155498                        | 0.007613579                                            | 26.22873175                                 |
| 2.739861899                             | -45.31779121                        | 0.010963697                                            | 31.99153852                                 |
| 3.403335803                             | -29.66236083                        | 0.006703398                                            | 22.47328016                                 |
| 2.350413169                             | -36.66749778                        | 0.009858089                                            | 43.5720723                                  |
| 2.223855182                             | -51.28745991                        | 0.008853591                                            | 32.46224525                                 |
| 2.529786183                             | -21.89059416                        | 0.012979556                                            | 43.93749091                                 |
| 2.587810575                             | -11.38121469                        | 0.01037936                                             | 28.86174251                                 |
| 2.972459463                             | -35.09621171                        | 0.030383521                                            | 15.3102243                                  |
| 2.799881872                             | 7.448636304                         | 0.007494958                                            | 24.49747676                                 |
| 2.310750787                             | -103.6896526                        | 0.015852026                                            | 32.80326916                                 |
| 2.421987279                             | 14.71368889                         | 0.030959045                                            | 18.55692908                                 |
| 3.435117669                             | 4.356904213                         | 0.008665083                                            | 46.59711604                                 |
| 2.885564312                             | -13.40319545                        | 0.010358804                                            | 23.16208923                                 |
| 1.881814398                             | -112.1075654                        | 0.013338892                                            | 33.57140092                                 |
| 3.118501553                             | -16.66197807                        | 0.008093129                                            | 29.46303352                                 |
| 2.87041442                              | -1.467994355                        | 0.015015289                                            | 22.14886306                                 |
| 3.947569232                             | -4.729109137                        | 0.010192888                                            | 19.09724641                                 |
| 2.534209774                             | -60.83755397                        | 0.007898006                                            | 38.12854737                                 |
| 2.349239822                             | -52.00108186                        | 0.006688129                                            | 34.54898199                                 |
| 3.33772419                              | -24.07456797                        | 0.004043227                                            | 35.45084657                                 |
| 2.63582112                              | -74.57577963                        | 0.012852971                                            | 28.35763232                                 |
| 2.434365553                             | -37.30872102                        | 0.019196318                                            | 20.72601452                                 |
| 2.29880161                              | -35.55621425                        | 0.015884198                                            | 36.63464064                                 |
| 3.036563267                             | 2.952679535                         | 0.007713771                                            | 33.16989574                                 |
| 3.948014909                             | 12.12740571                         | 0.012838464                                            | 14.77724635                                 |
| 3.462280864                             | -24.13316515                        | 0.008619647                                            | 15.91089548                                 |
| 2.492819116                             | -59.06205741                        | 0.019122904                                            | 30.31786967                                 |
| 2.891298597                             | 33.13172101                         | 0.009255766                                            | 27.52407858                                 |
| 2.729707574                             | -35.83765126                        | 0.01452317                                             | 43.39604443                                 |
| 2.580726338                             | -2.952122014                        | 0.012025152                                            | 38.69820217                                 |
| 2.580344252                             | -110.4707557                        | 0.013926923                                            | 42.62440138                                 |
| 2.648348353                             | -18.4242761                         | 0.012730498                                            | 27.35989365                                 |
| 2.496387478                             | -21.28761299                        | 0.011589176                                            | 31.65369333                                 |
| 2.302147558                             | -52.8229285                         | 0.011685256                                            | 40.83308074                                 |
| 3.168695423                             | -17.42144072                        | 0.012493989                                            | 21.1731095                                  |
| 2.989621166                             | -33.0241405                         | 0.006157782                                            | 17.18024098                                 |
| 4.142277558                             | 15.57468967                         | 0.00841092                                             | 20.66159577                                 |
| 2.634709962                             | -58.06271783                        | 0.008212898                                            | 43.01198914                                 |
| 2.30524916                              | -80.1550204                         | 0.013319261                                            | 28.55845997                                 |
| 2.297973033                             | -70.80779283                        | 0.021804632                                            | 41.79278669                                 |
| 2.211098575                             | -94.50246235                        | 0.026436678                                            | 30.89367841                                 |
| 2.689018042                             | -51.54822638                        | 0.005596268                                            | 22.0231334                                  |
| 2.365422761                             | -156.7113643                        | 0.015119134                                            | 52.76881061                                 |
| 2.257369943                             | -37.88742332                        | 0.010336807                                            | 30.22579504                                 |
| 3.015917222                             | 22.60551205                         | 0.005718431                                            | 30.56886415                                 |
| 2.646399086                             | 26.5833596                          | 0.025734205                                            | 10.89411678                                 |
| 2.751236071                             | 5.897135992                         | 0.013226191                                            | 22.37395012                                 |
| 3.242614829                             | -7.844184243                        | 0.007736432                                            | 18.24416197                                 |
| 2.395258223                             | -54.89018859                        | 0.016107275                                            | 41.33927919                                 |
| 2.55568542                              | -63.24770172                        | 0.003324676                                            | 48.92171513                                 |
| 2.095286094                             | -18.09530202                        | 0.017164914                                            | 23.27042316                                 |
| 2.815714762                             | -13.73375771                        | 0.032449712                                            | 21.61414594                                 |
| 3.290323709                             | -11.3391997                         | 0.004391528                                            | 28.64445191                                 |
| 2.530075599                             | -100.371809                         | 0.025158225                                            | 39.07603058                                 |
| 2.555273228                             | -57.32947688                        | 0.029211709                                            | 16.66692263                                 |
| 3.116154955                             | -33.60076624                        | 0.012084045                                            | 20.71370889                                 |
| 2.78828056                              | -11.67645582                        | 0.017229399                                            | 20.49486829                                 |
| 2.253136848                             | -95.97362401                        | 0.014801411                                            | 60.89094204                                 |
| 2.601707705                             | -0.221842927                        | 0.010246276                                            | 30.34313843                                 |
| 2.062278221                             | 26.25325772                         | 0.073982512                                            | 17.99173887                                 |
| 2.770108062                             | 20.59775458                         | 0.017471319                                            | 19.36871817                                 |
| 2.982697283                             | -60.22582003                        | 0.017240677                                            | 39.85097492                                 |



| log.sigma.5.0.mm.3D_glrIm_LowGrayLevelRunEmphasis | log.sigma.5.0.mm.3D_glrIm_GrayLevelNonUniformityNormalized | log.sigma.5.0.mm.3D_glrIm_RunVariance | log.sigma.5.0.mm.3D_glrIm_GrayLevelNonUniformity |
|---------------------------------------------------|------------------------------------------------------------|---------------------------------------|--------------------------------------------------|
| 0.011475429                                       | 0.042968196                                                | 0.069993189                           | 28.5535653                                       |
| 0.010631727                                       | 0.062691205                                                | 0.209835375                           | 114.4084615                                      |
| 0.015467036                                       | 0.06336151                                                 | 0.097426317                           | 25.36438818                                      |
| 0.004948466                                       | 0.051211559                                                | 0.109164329                           | 124.1935691                                      |
| 0.009143947                                       | 0.043028944                                                | 0.070195625                           | 14.49443126                                      |
| 0.013984603                                       | 0.058899417                                                | 0.092331258                           | 35.19580795                                      |
| 0.043644485                                       | 0.077756143                                                | 0.146369501                           | 23.22391682                                      |
| 0.011299121                                       | 0.039359486                                                | 0.065301749                           | 37.34524195                                      |
| 0.005189779                                       | 0.044112609                                                | 0.096383288                           | 85.14948065                                      |
| 0.010513941                                       | 0.059518731                                                | 0.13805844                            | 166.734949                                       |
| 0.011636533                                       | 0.053685583                                                | 0.087805518                           | 41.43357217                                      |
| 0.014673346                                       | 0.051637436                                                | 0.117290235                           | 70.25866329                                      |
| 0.024378382                                       | 0.051751664                                                | 0.139038048                           | 97.31698024                                      |
| 0.008062493                                       | 0.054653756                                                | 0.094246425                           | 56.77138769                                      |
| 0.00943091                                        | 0.054334586                                                | 0.109096968                           | 45.74905114                                      |
| 0.005350442                                       | 0.097336574                                                | 0.612086187                           | 528.2514741                                      |
| 0.016937931                                       | 0.050364723                                                | 0.080634729                           | 32.95666273                                      |
| 0.015812761                                       | 0.04654827                                                 | 0.111428117                           | 100.2937757                                      |
| 0.009568634                                       | 0.048728318                                                | 0.082657373                           | 26.47877924                                      |
| 0.017345033                                       | 0.070828024                                                | 0.218153586                           | 174.5842857                                      |
| 0.008309739                                       | 0.077330876                                                | 0.240664925                           | 347.4857522                                      |
| 0.012028552                                       | 0.054879229                                                | 0.118494963                           | 86.60151867                                      |
| 0.0067908                                         | 0.064197873                                                | 0.122895859                           | 159.801316                                       |
| 0.019106012                                       | 0.050571149                                                | 0.097729062                           | 22.43123555                                      |
| 0.023254378                                       | 0.073385096                                                | 0.135579118                           | 79.70548944                                      |
| 0.013323517                                       | 0.049234181                                                | 0.075431809                           | 32.10745896                                      |
| 0.010616727                                       | 0.078200164                                                | 0.408845418                           | 221.835643                                       |
| 0.02044193                                        | 0.05952728                                                 | 0.116690301                           | 78.04219499                                      |
| 0.008924154                                       | 0.047468856                                                | 0.083401006                           | 78.79162463                                      |
| 0.01379764                                        | 0.059741868                                                | 0.223192068                           | 132.4113787                                      |
| 0.0129995                                         | 0.067441771                                                | 0.144408678                           | 194.0249161                                      |
| 0.006943959                                       | 0.056521358                                                | 0.187644614                           | 298.5929742                                      |
| 0.008903786                                       | 0.047780344                                                | 0.107173829                           | 89.71940413                                      |
| 0.045588382                                       | 0.0650376                                                  | 0.059852133                           | 6.378288045                                      |
| 0.011444108                                       | 0.061202082                                                | 0.080012241                           | 18.97024778                                      |
| 0.010185943                                       | 0.04833583                                                 | 0.102683089                           | 90.77710599                                      |
| 0.015478319                                       | 0.053290718                                                | 0.119634148                           | 140.7588532                                      |
| 0.013936015                                       | 0.062001957                                                | 0.177086804                           | 184.9112238                                      |
| 0.007978616                                       | 0.064727356                                                | 0.156693924                           | 48.3741972                                       |
| 0.01160584                                        | 0.050870537                                                | 0.100881613                           | 49.48294685                                      |
| 0.007176195                                       | 0.062632766                                                | 0.170199339                           | 82.24375291                                      |
| 0.010318721                                       | 0.043700758                                                | 0.074050062                           | 39.20974506                                      |
| 0.00925556                                        | 0.048916848                                                | 0.0864149                             | 75.27230695                                      |
| 0.013903381                                       | 0.042779593                                                | 0.071115432                           | 41.35253724                                      |
| 0.01105511                                        | 0.052267384                                                | 0.131325126                           | 89.56789585                                      |
| 0.034789392                                       | 0.076886128                                                | 0.222668703                           | 149.0270719                                      |
| 0.008038479                                       | 0.056473373                                                | 0.139605133                           | 217.4729371                                      |
| 0.016699252                                       | 0.050051008                                                | 0.073007645                           | 27.45219916                                      |
| 0.032249797                                       | 0.066380515                                                | 0.062425475                           | 8.368215019                                      |
| 0.008946225                                       | 0.048730017                                                | 0.069561765                           | 22.83777588                                      |
| 0.011195681                                       | 0.059102095                                                | 0.173359403                           | 180.9795932                                      |
| 0.01399605                                        | 0.050827411                                                | 0.072649087                           | 39.67311546                                      |
| 0.008586513                                       | 0.053214293                                                | 0.138506637                           | 185.2657589                                      |
| 0.015819142                                       | 0.061742676                                                | 0.115219122                           | 33.65094478                                      |
| 0.011335159                                       | 0.080368799                                                | 0.303981075                           | 448.2501093                                      |
| 0.008197963                                       | 0.0457554                                                  | 0.073242376                           | 37.9394772                                       |
| 0.0070396                                         | 0.046527479                                                | 0.087782484                           | 95.27121738                                      |
| 0.004204306                                       | 0.053473054                                                | 0.107864719                           | 63.93653578                                      |
| 0.013803968                                       | 0.053503597                                                | 0.110503235                           | 39.95591011                                      |
| 0.021505625                                       | 0.061035512                                                | 0.11296365                            | 49.72006819                                      |
| 0.016908645                                       | 0.046290556                                                | 0.09144189                            | 91.58690459                                      |
| 0.008233915                                       | 0.049737012                                                | 0.124651275                           | 249.0327823                                      |
| 0.01397825                                        | 0.079450822                                                | 0.223939795                           | 214.8447177                                      |
| 0.009561306                                       | 0.077270757                                                | 0.31205548                            | 178.4068226                                      |
| 0.019905693                                       | 0.053516207                                                | 0.065980702                           | 10.95803331                                      |
| 0.009781777                                       | 0.055397741                                                | 0.109807127                           | 79.04427881                                      |
| 0.015367004                                       | 0.045413093                                                | 0.073313694                           | 16.87174545                                      |
| 0.012796654                                       | 0.045548658                                                | 0.118855795                           | 134.3233977                                      |
| 0.01441945                                        | 0.046792648                                                | 0.057993293                           | 19.82736354                                      |
| 0.013543864                                       | 0.053803487                                                | 0.106237857                           | 99.73907878                                      |
| 0.012423135                                       | 0.049889776                                                | 0.116867198                           | 139.3406147                                      |
| 0.012228669                                       | 0.043221003                                                | 0.074902455                           | 45.86009284                                      |
| 0.013560683                                       | 0.063107492                                                | 0.182938645                           | 291.197751                                       |
| 0.006796648                                       | 0.068712611                                                | 0.231342722                           | 402.2234508                                      |
| 0.009192269                                       | 0.072780412                                                | 0.26716604                            | 572.8214326                                      |
| 0.008611071                                       | 0.043883576                                                | 0.070755761                           | 46.21593662                                      |
| 0.014090665                                       | 0.051643164                                                | 0.082772296                           | 53.94436624                                      |
| 0.022795266                                       | 0.043350407                                                | 0.062584768                           | 25.06754329                                      |
| 0.028219007                                       | 0.049625261                                                | 0.096404613                           | 81.20331396                                      |
| 0.005950999                                       | 0.059377309                                                | 0.111646178                           | 155.1607412                                      |
| 0.015941671                                       | 0.040271288                                                | 0.056484501                           | 19.31563391                                      |
| 0.010786191                                       | 0.050369095                                                | 0.082406567                           | 63.2776003                                       |
| 0.006050697                                       | 0.052990277                                                | 0.121391812                           | 135.5069968                                      |
| 0.026883601                                       | 0.090277346                                                | 0.088194149                           | 12.04755322                                      |
| 0.014191787                                       | 0.059627644                                                | 0.139762661                           | 184.1437909                                      |
| 0.008569107                                       | 0.070706213                                                | 0.214324001                           | 337.2703332                                      |
| 0.017103074                                       | 0.043586807                                                | 0.071256505                           | 31.96366257                                      |
| 0.003428696                                       | 0.041792256                                                | 0.065513191                           | 61.44146039                                      |
| 0.01773243                                        | 0.063673633                                                | 0.104836143                           | 10.72040332                                      |
| 0.033914838                                       | 0.067685908                                                | 0.063480382                           | 6.667302581                                      |
| 0.004709442                                       | 0.055531658                                                | 0.19761606                            | 196.2021791                                      |
| 0.026792995                                       | 0.044835449                                                | 0.070442007                           | 29.85349322                                      |
| 0.032047494                                       | 0.068190534                                                | 0.182611333                           | 61.37187467                                      |
| 0.012983176                                       | 0.063128492                                                | 0.17666874                            | 231.4380387                                      |
| 0.018755166                                       | 0.06270603                                                 | 0.228354116                           | 319.6684923                                      |
| 0.015321068                                       | 0.041808087                                                | 0.047301826                           | 10.16125602                                      |
| 0.010774883                                       | 0.051224126                                                | 0.113010307                           | 57.23623895                                      |
| 0.078273105                                       | 0.066900887                                                | 0.055879854                           | 7.81149243                                       |
| 0.018606787                                       | 0.065410359                                                | 0.115558695                           | 22.59585513                                      |
| 0.018523816                                       | 0.047166567                                                | 0.129198931                           | 34.68286311                                      |

| log.sigma.5.0.mm.3D_glrIm_LongRunEmphasis | log.sigma.5.0.mm.3D_glrIm_ShortRunHighGrayLevelEmphasis | log.sigma.5.0.mm.3D_glrIm_RunLengthNonUniformity | log.sigma.5.0.mm.3D_glrIm_ShortRunEmphasis |
|-------------------------------------------|---------------------------------------------------------|--------------------------------------------------|--------------------------------------------|
| 1.19978259                                | 301.1810106                                             | 592.1957399                                      | 0.955895291                                |
| 1.1510309755                              | 190.7887741                                             | 1472.71875                                       | 0.916282618                                |
| 1.278949754                               | 154.7805795                                             | 345.089648                                       | 0.941329499                                |
| 1.293734761                               | 341.0367715                                             | 2089.328598                                      | 0.941973797                                |
| 1.208545748                               | 378.0909206                                             | 298.0731977                                      | 0.952699498                                |
| 1.252340056                               | 193.6029858                                             | 522.0276815                                      | 0.948043921                                |
| 1.434405395                               | 83.32973332                                             | 239.1233216                                      | 0.910318145                                |
| 1.1812251                                 | 340.233764                                              | 857.156849                                       | 0.961090054                                |
| 1.2583326                                 | 396.8553063                                             | 1686.492365                                      | 0.947983309                                |
| 1.363644695                               | 184.3315304                                             | 2342.816074                                      | 0.930836729                                |
| 1.240072379                               | 238.6281267                                             | 681.2414694                                      | 0.951182239                                |
| 1.307502987                               | 187.8571669                                             | 1169.64769                                       | 0.940942649                                |
| 1.359706855                               | 154.3419622                                             | 1586.343819                                      | 0.933667125                                |
| 1.254791901                               | 272.6486871                                             | 908.5547285                                      | 0.948318406                                |
| 1.28332214                                | 240.9207949                                             | 730.9933759                                      | 0.945179634                                |
| 2.289075179                               | 229.9227423                                             | 3716.575157                                      | 0.850668011                                |
| 1.223134404                               | 267.9882837                                             | 581.6558955                                      | 0.953678758                                |
| 1.285436945                               | 221.4073528                                             | 1876.298641                                      | 0.946292784                                |
| 1.233006535                               | 417.2606176                                             | 477.9412641                                      | 0.950340377                                |
| 1.516901541                               | 124.3008498                                             | 1997.616983                                      | 0.917604862                                |
| 1.598382958                               | 174.5473687                                             | 3482.851564                                      | 0.900843533                                |
| 1.313912196                               | 197.4308541                                             | 1354.005577                                      | 0.939630715                                |
| 1.32997302                                | 241.3257435                                             | 2105.311047                                      | 0.935052964                                |
| 1.276561974                               | 219.8409944                                             | 381.4801233                                      | 0.941562053                                |
| 1.369649442                               | 99.6597577                                              | 902.6633885                                      | 0.927694857                                |
| 1.209600367                               | 234.84276                                               | 580.5219551                                      | 0.95529659                                 |
| 1.915511931                               | 164.2671613                                             | 2072.181939                                      | 0.876977974                                |
| 1.31684431                                | 148.8795964                                             | 1117.439805                                      | 0.937531141                                |
| 1.218638061                               | 275.4520694                                             | 1490.524731                                      | 0.957450412                                |
| 1.545096636                               | 188.7902944                                             | 1761.745517                                      | 0.910390672                                |
| 1.371430766                               | 146.1581299                                             | 2417.487056                                      | 0.931848113                                |
| 1.453934733                               | 245.8390414                                             | 4354.840105                                      | 0.924335999                                |
| 1.281127476                               | 274.1672595                                             | 1630.739871                                      | 0.945439981                                |
| 1.187274997                               | 120.3558309                                             | 87.35443444                                      | 0.955009958                                |
| 1.230946184                               | 261.8029276                                             | 272.0274379                                      | 0.949534523                                |
| 1.262804431                               | 248.8084961                                             | 1654.189401                                      | 0.95048359                                 |
| 1.312144572                               | 170.4385997                                             | 2266.872029                                      | 0.940682371                                |
| 1.447922975                               | 156.5227915                                             | 2434.78248                                       | 0.920991119                                |
| 1.413760045                               | 301.787584                                              | 614.0064955                                      | 0.923070858                                |
| 1.266388364                               | 238.4848712                                             | 850.111312                                       | 0.9478524                                  |
| 1.437775955                               | 240.9180475                                             | 1072.976606                                      | 0.921345076                                |
| 1.203125301                               | 319.4035053                                             | 802.5609275                                      | 0.957253164                                |
| 1.228434972                               | 259.7111922                                             | 1370.300201                                      | 0.954875567                                |
| 1.196820876                               | 308.9679465                                             | 867.3509442                                      | 0.958341425                                |
| 1.337229728                               | 214.9567827                                             | 1459.252743                                      | 0.937335176                                |
| 1.555397951                               | 79.49448455                                             | 1532.859562                                      | 0.907366861                                |
| 1.370186055                               | 228.6252782                                             | 3205.107025                                      | 0.928914936                                |
| 1.205723626                               | 230.8097853                                             | 489.8979615                                      | 0.95605862                                 |
| 1.195872441                               | 136.4038931                                             | 111.8783902                                      | 0.953145666                                |
| 1.19594779                                | 454.2891002                                             | 419.6823366                                      | 0.957560956                                |
| 1.428231166                               | 181.5033942                                             | 2537.513942                                      | 0.926558271                                |
| 1.197789674                               | 222.3699253                                             | 703.3808527                                      | 0.959419299                                |
| 1.347183788                               | 238.7594248                                             | 2963.948165                                      | 0.937364816                                |
| 1.294393939                               | 193.1089183                                             | 473.3787934                                      | 0.945311478                                |
| 1.689353067                               | 158.2548313                                             | 4331.764347                                      | 0.900738129                                |
| 1.200659392                               | 317.9950358                                             | 746.3428724                                      | 0.958735508                                |
| 1.238340273                               | 293.8083263                                             | 1807.952993                                      | 0.951517413                                |
| 1.281088673                               | 470.0732665                                             | 1040.119708                                      | 0.945928181                                |
| 1.30282864                                | 203.7137619                                             | 638.1396319                                      | 0.938919354                                |
| 1.294731822                               | 157.5501919                                             | 710.4981043                                      | 0.944953652                                |
| 1.239587709                               | 203.2498219                                             | 1751.68064                                       | 0.953077633                                |
| 1.325252137                               | 262.79852                                               | 4270.580776                                      | 0.938193487                                |
| 1.548751246                               | 126.2296351                                             | 2163.378133                                      | 0.911061596                                |
| 1.723966067                               | 159.160624                                              | 1764.365613                                      | 0.893903734                                |
| 1.189806523                               | 196.4521448                                             | 183.4133794                                      | 0.957829826                                |
| 1.299701116                               | 208.9847185                                             | 1223.220352                                      | 0.940111786                                |
| 1.201904876                               | 355.7838921                                             | 333.2812701                                      | 0.957666278                                |
| 1.296791709                               | 236.4029936                                             | 2568.53278                                       | 0.946242082                                |
| 1.167543344                               | 323.8880905                                             | 384.4188706                                      | 0.962569437                                |
| 1.286069136                               | 183.3521409                                             | 1601.491129                                      | 0.943174706                                |
| 1.305784253                               | 211.1086939                                             | 2407.512595                                      | 0.941778004                                |
| 1.208194842                               | 267.1547505                                             | 945.3296886                                      | 0.955672713                                |
| 1.444239436                               | 152.6989932                                             | 3813.051629                                      | 0.925393198                                |
| 1.554401756                               | 204.8144782                                             | 4666.556624                                      | 0.911352083                                |
| 1.637565801                               | 176.6612329                                             | 6096.085155                                      | 0.900232109                                |
| 1.195969583                               | 359.6980391                                             | 946.4266719                                      | 0.958614016                                |
| 1.22883309                                | 198.8188028                                             | 923.4951793                                      | 0.952145615                                |
| 1.176327535                               | 250.3255426                                             | 523.1998448                                      | 0.961583244                                |
| 1.263339135                               | 162.9688942                                             | 1431.103045                                      | 0.947121636                                |
| 1.30025377                                | 279.5768611                                             | 2241.326247                                      | 0.940550682                                |
| 1.163510838                               | 341.3173231                                             | 436.6358353                                      | 0.963420703                                |
| 1.223828124                               | 243.2924705                                             | 1115.516145                                      | 0.95392381                                 |
| 1.318509802                               | 283.6923794                                             | 2190.622411                                      | 0.939470811                                |
| 1.271298847                               | 96.98987114                                             | 113.5189142                                      | 0.937415831                                |
| 1.349349332                               | 153.9177181                                             | 2634.487866                                      | 0.937819212                                |
| 1.539896916                               | 180.5041481                                             | 3767.27847                                       | 0.907621742                                |
| 1.198885271                               | 238.8797978                                             | 657.4979924                                      | 0.957751571                                |
| 1.181039365                               | 599.4538108                                             | 1328.655021                                      | 0.961201386                                |
| 1.296154448                               | 176.0780824                                             | 144.5506065                                      | 0.93958009                                 |
| 1.203165851                               | 117.8043753                                             | 86.51948194                                      | 0.950117793                                |
| 1.469665043                               | 331.6962388                                             | 2906.484547                                      | 0.923788364                                |
| 1.196386705                               | 191.8845347                                             | 597.4995619                                      | 0.958179201                                |
| 1.479962909                               | 94.28362723                                             | 720.4864073                                      | 0.912724579                                |
| 1.427947837                               | 158.4603329                                             | 3047.232395                                      | 0.927622327                                |
| 1.530349091                               | 132.6290765                                             | 4125.127281                                      | 0.917412616                                |
| 1.133558592                               | 434.2047238                                             | 225.412354                                       | 0.970680895                                |
| 1.300898858                               | 255.0874321                                             | 960.9997407                                      | 0.941383111                                |
| 1.166840837                               | 87.89357906                                             | 105.5565644                                      | 0.961315979                                |
| 1.322552592                               | 183.5458214                                             | 291.3950949                                      | 0.933947592                                |
| 1.337509996                               | 229.2283776                                             | 623.7806314                                      | 0.935913568                                |

| log.sigma.5.0.mm.3D_glrIm_LongRunHighGrayLevelEmphasis | log.sigma.5.0.mm.3D_glrIm_RunPercentage | log.sigma.5.0.mm.3D_glrIm_LongRunLowGrayLevelEmphasis | log.sigma.5.0.mm.3D_glrIm_RunEntropy |
|--------------------------------------------------------|-----------------------------------------|-------------------------------------------------------|--------------------------------------|
| 366.3110955                                            | 0.941272608                             | 0.014000802                                           | 5.005974337                          |
| 297.6662155                                            | 0.878448946                             | 0.015269057                                           | 4.81300522                           |
| 200.548786                                             | 0.922367955                             | 0.019451945                                           | 4.468936587                          |
| 464.9808767                                            | 0.920216027                             | 0.006155607                                           | 4.886914651                          |
| 476.7862724                                            | 0.938290122                             | 0.010678988                                           | 4.945454149                          |
| 253.5484858                                            | 0.929178131                             | 0.017070647                                           | 4.605842496                          |
| 120.0875337                                            | 0.886327323                             | 0.066651251                                           | 4.339099465                          |
| 408.9704627                                            | 0.946952249                             | 0.013095319                                           | 5.091200257                          |
| 509.8497228                                            | 0.928404928                             | 0.006465133                                           | 5.051673252                          |
| 250.2533029                                            | 0.904231018                             | 0.01477364                                            | 4.738805711                          |
| 311.5498754                                            | 0.933215515                             | 0.013766077                                           | 4.718120099                          |
| 251.7832584                                            | 0.918094052                             | 0.019478824                                           | 4.839728341                          |
| 220.9375025                                            | 0.90668348                              | 0.032902699                                           | 4.866949929                          |
| 363.7847957                                            | 0.929062887                             | 0.009688299                                           | 4.730121227                          |
| 318.2759255                                            | 0.924174618                             | 0.011686324                                           | 4.789784687                          |
| 582.920661                                             | 0.779052386                             | 0.011127502                                           | 4.720539457                          |
| 334.9405652                                            | 0.937403571                             | 0.023294182                                           | 4.805342768                          |
| 279.4461756                                            | 0.923868584                             | 0.020767798                                           | 4.978337522                          |
| 541.7635016                                            | 0.933518372                             | 0.011232937                                           | 4.914213776                          |
| 191.6540938                                            | 0.879685826                             | 0.02620884                                            | 4.602377728                          |
| 291.5239086                                            | 0.860010013                             | 0.012911236                                           | 4.584374606                          |
| 265.9123485                                            | 0.917486583                             | 0.016112169                                           | 4.779967691                          |
| 326.9328911                                            | 0.911359603                             | 0.009023443                                           | 4.670598951                          |
| 304.480376                                             | 0.922277307                             | 0.024223836                                           | 4.782853253                          |
| 138.1819586                                            | 0.902185024                             | 0.033399544                                           | 4.403050419                          |
| 282.84511                                              | 0.939592108                             | 0.016283729                                           | 4.814112102                          |
| 331.4674663                                            | 0.817746016                             | 0.018165295                                           | 4.732316993                          |
| 195.0480797                                            | 0.914756562                             | 0.028509676                                           | 4.676927609                          |
| 351.2911253                                            | 0.94042275                              | 0.010557829                                           | 4.822757603                          |
| 318.8999492                                            | 0.871694002                             | 0.019445854                                           | 4.882085597                          |
| 197.9285446                                            | 0.904856389                             | 0.018757522                                           | 4.571895239                          |
| 363.3693721                                            | 0.890712155                             | 0.010043247                                           | 4.885918088                          |
| 367.4474916                                            | 0.923644481                             | 0.011156338                                           | 4.942633427                          |
| 145.9913339                                            | 0.943047337                             | 0.055104106                                           | 4.301166919                          |
| 336.8280856                                            | 0.933271548                             | 0.013219745                                           | 4.589883205                          |
| 331.5804325                                            | 0.929626809                             | 0.012347381                                           | 4.862195752                          |
| 222.2674267                                            | 0.917013889                             | 0.020958398                                           | 4.82441879                           |
| 244.456892                                             | 0.888972983                             | 0.0198219                                             | 4.713770454                          |
| 472.0678624                                            | 0.894426532                             | 0.009766167                                           | 4.76127059                           |
| 306.3647261                                            | 0.927183398                             | 0.014950673                                           | 4.849592574                          |
| 360.7423657                                            | 0.890303726                             | 0.009708263                                           | 4.758730377                          |
| 402.5105282                                            | 0.941480345                             | 0.012374087                                           | 4.982057638                          |
| 333.7958904                                            | 0.936990537                             | 0.011194641                                           | 4.812968718                          |
| 380.6123617                                            | 0.9430394                               | 0.017775835                                           | 5.012415155                          |
| 298.4559193                                            | 0.912345376                             | 0.014372379                                           | 4.855632424                          |
| 114.6297436                                            | 0.869665792                             | 0.059141466                                           | 4.488062843                          |
| 328.7955114                                            | 0.902629017                             | 0.010758854                                           | 4.828309901                          |
| 285.729222                                             | 0.940757356                             | 0.020330208                                           | 4.754058592                          |
| 165.4206618                                            | 0.94087256                              | 0.03747702                                            | 4.30523997                           |
| 568.5764864                                            | 0.942888098                             | 0.010118127                                           | 4.961300605                          |
| 264.721568                                             | 0.894185838                             | 0.015684984                                           | 4.779419933                          |
| 276.2573907                                            | 0.94381918                              | 0.016960876                                           | 4.670954867                          |
| 325.5694006                                            | 0.911018058                             | 0.011187729                                           | 4.888756905                          |
| 261.064645                                             | 0.922035663                             | 0.019462356                                           | 4.596472219                          |
| 276.668454                                             | 0.853300157                             | 0.018356843                                           | 4.683259624                          |
| 391.1895056                                            | 0.943379715                             | 0.009588078                                           | 4.901758645                          |
| 370.7009735                                            | 0.933705146                             | 0.008738092                                           | 4.910596112                          |
| 639.5994695                                            | 0.92450473                              | 0.005009711                                           | 4.905758169                          |
| 265.0619531                                            | 0.917312417                             | 0.018213201                                           | 4.80796291                           |
| 210.5777215                                            | 0.924648564                             | 0.031931279                                           | 4.54290528                           |
| 248.8289783                                            | 0.933676988                             | 0.022066149                                           | 4.901341472                          |
| 361.4997154                                            | 0.913935462                             | 0.010771799                                           | 4.981276209                          |
| 201.7091561                                            | 0.874159821                             | 0.020828161                                           | 4.511934263                          |
| 287.9202489                                            | 0.845027181                             | 0.015542603                                           | 4.622967248                          |
| 238.0444066                                            | 0.943637008                             | 0.023172983                                           | 4.621324308                          |
| 277.5637606                                            | 0.918519986                             | 0.012405323                                           | 4.790849286                          |
| 443.4646763                                            | 0.942795783                             | 0.018822024                                           | 4.919163121                          |
| 311.115097                                             | 0.922355093                             | 0.016664415                                           | 5.006749715                          |
| 389.2566868                                            | 0.949982753                             | 0.016435859                                           | 4.86670814                           |
| 238.1341114                                            | 0.921738133                             | 0.017522203                                           | 4.785455505                          |
| 274.655871                                             | 0.918775304                             | 0.016613283                                           | 4.894496215                          |
| 333.0435099                                            | 0.939837842                             | 0.014662602                                           | 4.971493546                          |
| 221.9219778                                            | 0.892563706                             | 0.019675014                                           | 4.722016819                          |
| 327.4255316                                            | 0.871432171                             | 0.010698676                                           | 4.655723124                          |
| 304.7370638                                            | 0.856711916                             | 0.014022481                                           | 4.777111293                          |
| 445.8117476                                            | 0.943617315                             | 0.010312617                                           | 4.993316292                          |
| 247.7787566                                            | 0.9351973                               | 0.017595983                                           | 4.726284971                          |
| 299.2591487                                            | 0.948045397                             | 0.027765403                                           | 4.921037183                          |
| 207.2545573                                            | 0.927699285                             | 0.03660074                                            | 4.812055076                          |
| 372.5402489                                            | 0.918238824                             | 0.007688544                                           | 4.669636534                          |
| 403.1682586                                            | 0.951617827                             | 0.019305338                                           | 5.031335531                          |
| 313.0743498                                            | 0.936843917                             | 0.012820499                                           | 4.76559031                           |
| 390.6429533                                            | 0.915775843                             | 0.007749429                                           | 4.889119799                          |
| 128.9028548                                            | 0.920424403                             | 0.031663322                                           | 4.02675389                           |
| 209.9250343                                            | 0.91075925                              | 0.019450835                                           | 4.682731049                          |
| 282.0925862                                            | 0.870877114                             | 0.013279777                                           | 4.676130708                          |
| 290.4333082                                            | 0.942554874                             | 0.021582912                                           | 4.938936168                          |
| 737.0362891                                            | 0.947214512                             | 0.003886109                                           | 5.044171925                          |
| 241.8403679                                            | 0.919293821                             | 0.02036163                                            | 4.415449852                          |
| 139.7237208                                            | 0.937728938                             | 0.0398054                                             | 4.335113882                          |
| 508.8589889                                            | 0.888437349                             | 0.006559336                                           | 4.955767243                          |
| 224.9204624                                            | 0.943124864                             | 0.034552693                                           | 4.887062056                          |
| 146.1363981                                            | 0.880550956                             | 0.046121875                                           | 4.569046822                          |
| 236.2585027                                            | 0.89616325                              | 0.017910585                                           | 4.699651596                          |
| 212.5231216                                            | 0.877858449                             | 0.027449818                                           | 4.741257331                          |
| 508.742524                                             | 0.960474308                             | 0.017423727                                           | 4.923888546                          |
| 349.045473                                             | 0.918838563                             | 0.013306949                                           | 4.860690702                          |
| 102.9747757                                            | 0.94934334                              | 0.099491094                                           | 4.178696822                          |
| 263.1214963                                            | 0.911508017                             | 0.02341365                                            | 4.505926649                          |
| 307.1187682                                            | 0.911066629                             | 0.024621538                                           | 5.021679911                          |

| log.sigma.5.0.mm.3D_glrIm_HighGrayLevelRunEmphasis | log.sigma.5.0.mm.3D_glrIm_RunLengthNonUniformityNormalized | log.sigma.5.0.mm.3D_glszm_GrayLevelVariance |
|----------------------------------------------------|------------------------------------------------------------|---------------------------------------------|
| 312.6982089                                        | 0.890654309                                                | 46.78104476                                 |
| 205.6002793                                        | 0.805879283                                                | 30.61374393                                 |
| 162.5495749                                        | 0.85952247                                                 | 20.71935132                                 |
| 361.609874                                         | 0.860280583                                                | 36.90928782                                 |
| 395.9502013                                        | 0.883756638                                                | 44.87882903                                 |
| 203.467636                                         | 0.873075756                                                | 26.89175191                                 |
| 89.53215009                                        | 0.795373677                                                | 12.68888504                                 |
| 352.5693661                                        | 0.903033332                                                | 54.32612145                                 |
| 416.0413107                                        | 0.873094531                                                | 46.49131302                                 |
| 195.0037089                                        | 0.835472105                                                | 26.34974035                                 |
| 250.3704016                                        | 0.881164622                                                | 32.05074447                                 |
| 198.1368009                                        | 0.858167457                                                | 33.27620181                                 |
| 164.8222516                                        | 0.842308444                                                | 29.57899357                                 |
| 287.6270922                                        | 0.873949199                                                | 29.89008937                                 |
| 253.3005636                                        | 0.86712048                                                 | 34.96799607                                 |
| 267.0683462                                        | 0.682214319                                                | 29.28455933                                 |
| 279.338693                                         | 0.887110189                                                | 33.70827972                                 |
| 230.9039177                                        | 0.869988862                                                | 38.9400968                                  |
| 438.8619952                                        | 0.878525079                                                | 47.33730128                                 |
| 133.7124126                                        | 0.808973709                                                | 23.73362202                                 |
| 191.225864                                         | 0.773866172                                                | 20.63103752                                 |
| 208.3786053                                        | 0.855683198                                                | 28.46627071                                 |
| 255.5042415                                        | 0.844680742                                                | 28.28581602                                 |
| 234.5139038                                        | 0.85872905                                                 | 32.27092746                                 |
| 105.8940035                                        | 0.829174407                                                | 16.8731                                     |
| 243.5212545                                        | 0.889633747                                                | 36.6559453                                  |
| 184.1352858                                        | 0.728957337                                                | 27.60403576                                 |
| 156.4375661                                        | 0.850678333                                                | 24.20462183                                 |
| 287.6606184                                        | 0.896233865                                                | 33.05887472                                 |
| 206.505803                                         | 0.793601396                                                | 30.64061473                                 |
| 154.2806632                                        | 0.838562165                                                | 21.44607242                                 |
| 262.8081178                                        | 0.822793885                                                | 30.36646812                                 |
| 289.2618429                                        | 0.867757574                                                | 39.32561084                                 |
| 125.0578733                                        | 0.889161811                                                | 23.93383743                                 |
| 274.9149304                                        | 0.876700989                                                | 34.3577431                                  |
| 261.6527311                                        | 0.879771284                                                | 34.92226172                                 |
| 178.7420283                                        | 0.857291297                                                | 32.82012397                                 |
| 169.756862                                         | 0.815070817                                                | 23.45609566                                 |
| 327.932532                                         | 0.819884987                                                | 38.7935466                                  |
| 249.7434866                                        | 0.873254438                                                | 36.96753358                                 |
| 259.2924575                                        | 0.815888685                                                | 30.76057316                                 |
| 333.6574705                                        | 0.894107579                                                | 42.15475778                                 |
| 271.769812                                         | 0.889532946                                                | 32.42500334                                 |
| 321.2889607                                        | 0.896794837                                                | 47.05923097                                 |
| 227.7129879                                        | 0.85017838                                                 | 35.11555556                                 |
| 84.50022686                                        | 0.788208224                                                | 17.79767944                                 |
| 244.7804135                                        | 0.831265987                                                | 32.46001994                                 |
| 240.1954751                                        | 0.892005351                                                | 32.60946746                                 |
| 141.9737573                                        | 0.885524061                                                | 22.75504132                                 |
| 474.0561762                                        | 0.894901117                                                | 61.69896194                                 |
| 193.6033782                                        | 0.82745846                                                 | 28.79116834                                 |
| 231.0705555                                        | 0.900083023                                                | 29.02071868                                 |
| 252.166954                                         | 0.850265196                                                | 37.09445306                                 |
| 203.3362632                                        | 0.867858927                                                | 30.62357649                                 |
| 172.9803558                                        | 0.775403253                                                | 27.23278169                                 |
| 330.3960425                                        | 0.898621859                                                | 43.08769776                                 |
| 306.7385882                                        | 0.881637714                                                | 36.37991188                                 |
| 497.2613388                                        | 0.868990961                                                | 46.74959138                                 |
| 214.2317778                                        | 0.853219405                                                | 29.65578992                                 |
| 165.8615351                                        | 0.868557661                                                | 21.38093896                                 |
| 210.967792                                         | 0.885021323                                                | 34.53239068                                 |
| 278.6537834                                        | 0.851847207                                                | 36.77369858                                 |
| 136.95008                                          | 0.796671991                                                | 23.3484678                                  |
| 175.3559505                                        | 0.761751034                                                | 23.79146067                                 |
| 203.7168303                                        | 0.895334076                                                | 31.43576389                                 |
| 220.5661894                                        | 0.856012269                                                | 35.11871952                                 |
| 370.4177223                                        | 0.895781359                                                | 48.52511617                                 |
| 247.777144                                         | 0.870164745                                                | 40.0682015                                  |
| 335.2524141                                        | 0.906635895                                                | 45.76653714                                 |
| 192.5879152                                        | 0.862840315                                                | 31.12729918                                 |
| 221.4552169                                        | 0.860340785                                                | 33.16932702                                 |
| 278.6266447                                        | 0.890429886                                                | 40.43331739                                 |
| 162.9136324                                        | 0.82492628                                                 | 26.4240547                                  |
| 221.685127                                         | 0.795757393                                                | 21.092771                                   |
| 194.3408036                                        | 0.773233142                                                | 33.91757607                                 |
| 374.2827796                                        | 0.897787788                                                | 48.75770561                                 |
| 207.2416242                                        | 0.882899768                                                | 29.84317262                                 |
| 258.910387                                         | 0.904220137                                                | 40.93671202                                 |
| 170.2778633                                        | 0.872502995                                                | 30.57423054                                 |
| 294.9936642                                        | 0.856722183                                                | 24.67586358                                 |
| 352.303171                                         | 0.909122776                                                | 51.64628929                                 |
| 254.8616045                                        | 0.88700858                                                 | 30.03737528                                 |
| 300.7652654                                        | 0.855146057                                                | 37.68732236                                 |
| 102.8242114                                        | 0.849350366                                                | 16.06781678                                 |
| 162.4497451                                        | 0.851691872                                                | 25.32173217                                 |
| 195.7383827                                        | 0.787922177                                                | 25.22337705                                 |
| 247.9333132                                        | 0.895738908                                                | 39.13010308                                 |
| 623.0892327                                        | 0.903352954                                                | 51.63663578                                 |
| 186.7830167                                        | 0.856267028                                                | 27.916307                                   |
| 122.1002284                                        | 0.87742688                                                 | 27.3936673                                  |
| 356.4570791                                        | 0.821631721                                                | 39.11612399                                 |
| 197.9682856                                        | 0.896599227                                                | 38.64547141                                 |
| 102.3201589                                        | 0.798325087                                                | 18.81014463                                 |
| 169.6411335                                        | 0.829643444                                                | 27.66620358                                 |
| 143.1744997                                        | 0.808227147                                                | 25.34743466                                 |
| 446.7433118                                        | 0.926566941                                                | 63.02323896                                 |
| 270.4601976                                        | 0.858899182                                                | 39.38184943                                 |
| 90.87676716                                        | 0.90334569                                                 | 16.37723214                                 |
| 196.7112332                                        | 0.842212567                                                | 23.20865218                                 |
| 241.3544504                                        | 0.847067377                                                | 44.8705312                                  |

| log.sigma.5.0.mm.3D_glszm_SmallAreaHighGrayLevelEmphasis | log.sigma.5.0.mm.3D_glszm_GrayLevelNonUniformityNormalized | log.sigma.5.0.mm.3D_glszm_SizeZoneNonUniformityNormalized |
|----------------------------------------------------------|------------------------------------------------------------|-----------------------------------------------------------|
| 224.0373966                                              | 0.040603303                                                | 0.322457309                                               |
| 163.3235049                                              | 0.050816945                                                | 0.287102675                                               |
| 99.95887573                                              | 0.061198175                                                | 0.265423527                                               |
| 203.8289906                                              | 0.045451609                                                | 0.289307856                                               |
| 222.5320316                                              | 0.043005885                                                | 0.291484332                                               |
| 108.7997454                                              | 0.055064547                                                | 0.229457085                                               |
| 62.8040718                                               | 0.07998615                                                 | 0.231648199                                               |
| 232.4557654                                              | 0.037480794                                                | 0.346285703                                               |
| 287.0136357                                              | 0.040692676                                                | 0.307464159                                               |
| 151.7841026                                              | 0.054894214                                                | 0.28586052                                                |
| 123.4858929                                              | 0.04952403                                                 | 0.270872676                                               |
| 126.843469                                               | 0.049053318                                                | 0.263572043                                               |
| 89.30228755                                              | 0.050692999                                                | 0.223989298                                               |
| 158.2950567                                              | 0.051275412                                                | 0.262591311                                               |
| 166.9830329                                              | 0.048981693                                                | 0.276086254                                               |
| 174.8299682                                              | 0.0518724                                                  | 0.264947322                                               |
| 183.6414647                                              | 0.050383842                                                | 0.301392242                                               |
| 178.3639596                                              | 0.044475608                                                | 0.301649262                                               |
| 259.7702713                                              | 0.044717676                                                | 0.307110972                                               |
| 98.40908006                                              | 0.057120797                                                | 0.241783696                                               |
| 131.6763809                                              | 0.064447577                                                | 0.243737581                                               |
| 135.1897428                                              | 0.053757197                                                | 0.255963613                                               |
| 175.8674936                                              | 0.054227223                                                | 0.263599336                                               |
| 128.4768655                                              | 0.051092746                                                | 0.30137741                                                |
| 88.60475339                                              | 0.067333333                                                | 0.308155556                                               |
| 194.4362656                                              | 0.045755054                                                | 0.341640904                                               |
| 138.8202192                                              | 0.054717915                                                | 0.276594836                                               |
| 108.82513                                                | 0.057015974                                                | 0.239854021                                               |
| 160.0069593                                              | 0.047700758                                                | 0.313486753                                               |
| 160.8949211                                              | 0.050213675                                                | 0.292457676                                               |
| 124.308144                                               | 0.061403667                                                | 0.273599697                                               |
| 175.9811666                                              | 0.050305076                                                | 0.267453158                                               |
| 173.8100384                                              | 0.044330593                                                | 0.275737348                                               |
| 95.33416124                                              | 0.061436673                                                | 0.364839319                                               |
| 164.1695095                                              | 0.048795989                                                | 0.291716687                                               |
| 148.4143498                                              | 0.046465316                                                | 0.283476702                                               |
| 148.7094834                                              | 0.049000517                                                | 0.304323347                                               |
| 90.15136472                                              | 0.058591476                                                | 0.238818932                                               |
| 170.0093822                                              | 0.049879808                                                | 0.246440459                                               |
| 182.1511505                                              | 0.04553674                                                 | 0.344707472                                               |
| 167.6357864                                              | 0.052281909                                                | 0.26415541                                                |
| 194.2726356                                              | 0.042548271                                                | 0.303141982                                               |
| 148.4098757                                              | 0.048790129                                                | 0.29090087                                                |
| 209.6621059                                              | 0.040611431                                                | 0.326005441                                               |
| 140.7888349                                              | 0.046268861                                                | 0.272318244                                               |
| 78.98740436                                              | 0.065138469                                                | 0.282214718                                               |
| 159.1990136                                              | 0.048460649                                                | 0.274381071                                               |
| 142.6659639                                              | 0.050807217                                                | 0.298999196                                               |
| 110.6210547                                              | 0.06446281                                                 | 0.296528926                                               |
| 287.3382489                                              | 0.039023453                                                | 0.34174356                                                |
| 137.8022487                                              | 0.052257512                                                | 0.257768684                                               |
| 140.156929                                               | 0.052769682                                                | 0.316151415                                               |
| 175.2165234                                              | 0.045367276                                                | 0.282528376                                               |
| 118.9530153                                              | 0.051810814                                                | 0.250162443                                               |
| 135.4621775                                              | 0.053881543                                                | 0.303589593                                               |
| 239.4494395                                              | 0.04310339                                                 | 0.359716647                                               |
| 211.9967507                                              | 0.045787724                                                | 0.339355997                                               |
| 285.8923124                                              | 0.042709409                                                | 0.317033432                                               |
| 151.6808361                                              | 0.052220419                                                | 0.293371793                                               |
| 89.77797113                                              | 0.060070577                                                | 0.241798495                                               |
| 166.3840376                                              | 0.046989167                                                | 0.328675058                                               |
| 178.628925                                               | 0.046771907                                                | 0.305575361                                               |
| 91.09711822                                              | 0.05808518                                                 | 0.231631968                                               |
| 127.2185955                                              | 0.05674536                                                 | 0.239964651                                               |
| 144.1372379                                              | 0.052517361                                                | 0.335503472                                               |
| 146.6504487                                              | 0.047106097                                                | 0.278555753                                               |
| 239.5590493                                              | 0.041419644                                                | 0.28889601                                                |
| 171.353049                                               | 0.043533366                                                | 0.302056065                                               |
| 231.8394439                                              | 0.041755576                                                | 0.371532535                                               |
| 140.2371825                                              | 0.049741942                                                | 0.292232321                                               |
| 157.4319972                                              | 0.047321439                                                | 0.294798888                                               |
| 168.9100742                                              | 0.043608373                                                | 0.303993706                                               |
| 125.1694188                                              | 0.05382092                                                 | 0.265446585                                               |
| 157.9273624                                              | 0.061185303                                                | 0.249855957                                               |
| 126.3967413                                              | 0.047867946                                                | 0.259745929                                               |
| 263.5932978                                              | 0.040764034                                                | 0.340277503                                               |
| 137.8471733                                              | 0.051013364                                                | 0.279108961                                               |
| 184.3953233                                              | 0.043915699                                                | 0.326563452                                               |
| 116.7106592                                              | 0.050031688                                                | 0.267459428                                               |
| 198.3790929                                              | 0.056979708                                                | 0.278116116                                               |
| 248.3172549                                              | 0.039432079                                                | 0.37007874                                                |
| 152.1181412                                              | 0.050533318                                                | 0.318520403                                               |
| 174.3686203                                              | 0.04610933                                                 | 0.268664453                                               |
| 62.68538754                                              | 0.077929804                                                | 0.251635931                                               |
| 110.5727127                                              | 0.0552098                                                  | 0.259109987                                               |
| 127.4150328                                              | 0.055241955                                                | 0.240154429                                               |
| 178.9979467                                              | 0.044053062                                                | 0.347203059                                               |
| 373.8783335                                              | 0.039722582                                                | 0.344655039                                               |
| 129.3348884                                              | 0.059485832                                                | 0.39388253                                                |
| 116.9433998                                              | 0.061436673                                                | 0.38563327                                                |
| 238.7251446                                              | 0.044624436                                                | 0.2898635                                                 |
| 168.109368                                               | 0.04579187                                                 | 0.364100186                                               |
| 75.8351422                                               | 0.066983471                                                | 0.298677686                                               |
| 110.6152865                                              | 0.052927961                                                | 0.26085551                                                |
| 103.9270018                                              | 0.055090715                                                | 0.287511229                                               |
| 286.1330755                                              | 0.037937995                                                | 0.405724341                                               |
| 152.925521                                               | 0.043646859                                                | 0.275886634                                               |
| 69.45902679                                              | 0.073979592                                                | 0.304846939                                               |
| 105.3984859                                              | 0.064381186                                                | 0.252117131                                               |
| 221.3866349                                              | 0.042330438                                                | 0.333235655                                               |

| log.sigma.5.0.mm.3D_glszm_SizeZoneNonUniformity | log.sigma.5.0.mm.3D_glszm_GrayLevelNonUniformity | log.sigma.5.0.mm.3D_glszm_LargeAreaEmphasis | log.sigma.5.0.mm.3D_glszm_ZoneVariance |
|-------------------------------------------------|--------------------------------------------------|---------------------------------------------|----------------------------------------|
| 94.15753425                                     | 11.85616438                                      | 12.48630137                                 | 6.640504785                            |
| 140.9674134                                     | 24.95112016                                      | 166.8533605                                 | 148.9592544                            |
| 37.69014085                                     | 8.690140845                                      | 20.63380282                                 | 11.29260067                            |
| 246.7796014                                     | 38.77022274                                      | 38.47948417                                 | 28.93696202                            |
| 41.09929078                                     | 6.063829787                                      | 12.82978723                                 | 6.347165636                            |
| 45.20304569                                     | 10.84771574                                      | 24.49238579                                 | 13.83895488                            |
| 17.60526316                                     | 6.078947368                                      | 57.32894737                                 | 37.66672438                            |
| 154.7897092                                     | 16.75391499                                      | 10.06263982                                 | 5.037821119                            |
| 226.6010855                                     | 29.99050204                                      | 24.17232022                                 | 16.21486867                            |
| 238.4076739                                     | 45.78177458                                      | 79.39568345                                 | 65.59722007                            |
| 75.5734767                                      | 13.8172043                                       | 19.65949821                                 | 10.8732673                             |
| 112.2816901                                     | 20.89671362                                      | 39.01877934                                 | 26.91622033                            |
| 103.9310345                                     | 23.52155172                                      | 83.84913793                                 | 63.86977928                            |
| 93.74509804                                     | 18.30532213                                      | 22.66666667                                 | 12.85941828                            |
| 79.78892734                                     | 14.15570934                                      | 24.5916955                                  | 14.65502089                            |
| 237.657748                                      | 46.52954292                                      | 3447.651059                                 | 3387.67061                             |
| 79.2661597                                      | 13.25095057                                      | 20.53231939                                 | 13.48864376                            |
| 238.0012674                                     | 35.09125475                                      | 36.22813688                                 | 27.49232877                            |
| 69.40707965                                     | 10.10619469                                      | 13.62831858                                 | 6.996554155                            |
| 126.6946565                                     | 29.93129771                                      | 248.6507634                                 | 220.07725                              |
| 207.4206816                                     | 54.84488837                                      | 680.9494712                                 | 643.2663197                            |
| 127.4698795                                     | 26.77108434                                      | 34.87951807                                 | 22.95067821                            |
| 187.419128                                      | 38.55555556                                      | 69.50070323                                 | 54.74689281                            |
| 49.72727273                                     | 8.43030303                                       | 21.4                                        | 12.90189164                            |
| 92.44666667                                     | 20.2                                             | 78.33333333                                 | 62.22648889                            |
| 99.07586207                                     | 13.26896552                                      | 13.4137931                                  | 7.686848989                            |
| 133.8719008                                     | 26.48347107                                      | 1041.078512                                 | 989.7963425                            |
| 95.70175439                                     | 22.74937343                                      | 41.72180451                                 | 28.82308528                            |
| 218.8137536                                     | 33.29512894                                      | 13.75787966                                 | 7.363792169                            |
| 182.4935897                                     | 31.33333333                                      | 160.0352564                                 | 143.4400785                            |
| 223.2573529                                     | 50.10539216                                      | 133.6727941                                 | 118.4952768                            |
| 392.3537832                                     | 73.79754601                                      | 130.5153374                                 | 114.1754463                            |
| 173.4387917                                     | 27.88394277                                      | 32.19554849                                 | 21.74898456                            |
| 16.7826087                                      | 2.826086957                                      | 8.391304348                                 | 3.279773157                            |
| 34.71428571                                     | 5.806722689                                      | 16.3697479                                  | 8.5861168                              |
| 198.1502146                                     | 32.47925608                                      | 21.04148784                                 | 12.6902974                             |
| 267.8045455                                     | 43.12045455                                      | 40.90681818                                 | 30.19607438                            |
| 157.1428571                                     | 38.55319149                                      | 216.768997                                  | 190.7868922                            |
| 51.25961538                                     | 10.375                                           | 79.88942308                                 | 63.77383044                            |
| 136.8488665                                     | 18.07808564                                      | 24.88916877                                 | 17.90732763                            |
| 94.03932584                                     | 18.61235955                                      | 128.5168539                                 | 111.3735324                            |
| 112.7688172                                     | 15.82795699                                      | 12.86827957                                 | 6.305317089                            |
| 172.5042159                                     | 28.93254637                                      | 18.54300169                                 | 10.87579945                            |
| 138.8779343                                     | 17.30046948                                      | 12.43896714                                 | 6.649634111                            |
| 147.0518519                                     | 24.98518519                                      | 44.59259259                                 | 32.49765432                            |
| 127.8432671                                     | 29.50772627                                      | 262.0573951                                 | 237.8675009                            |
| 287.2769819                                     | 50.7382999                                       | 87.03151862                                 | 70.42998005                            |
| 69.96581197                                     | 11.88888889                                      | 13.26068376                                 | 7.053345752                            |
| 16.30909091                                     | 3.545454545                                      | 10.10909091                                 | 4.17322314                             |
| 69.71568627                                     | 7.960784314                                      | 12.94607843                                 | 7.010644944                            |
| 214.2057762                                     | 43.42599278                                      | 99.26113117                                 | 82.28395464                            |
| 106.5430267                                     | 17.78338279                                      | 14.15727003                                 | 8.135124902                            |
| 327.4503883                                     | 52.58067299                                      | 54.41156169                                 | 43.54262139                            |
| 42.77777778                                     | 8.859649123                                      | 35                                          | 23.05509388                            |
| 397.3987777                                     | 70.53093965                                      | 1155.103896                                 | 1130.271681                            |
| 138.4909091                                     | 16.59480519                                      | 10.63636364                                 | 5.423740934                            |
| 286.0771056                                     | 38.59905101                                      | 18.71293001                                 | 11.94552585                            |
| 139.1776765                                     | 18.74943052                                      | 37.61047836                                 | 28.93550781                            |
| 75.68992248                                     | 13.47286822                                      | 35.27131783                                 | 25.31704825                            |
| 66.01098901                                     | 16.3992674                                       | 25.73992674                                 | 15.32571214                            |
| 248.1496689                                     | 35.47682119                                      | 40.19470199                                 | 32.31757204                            |
| 521.9227166                                     | 79.88641686                                      | 62.94028103                                 | 52.65376462                            |
| 140.8322368                                     | 35.31578947                                      | 180.7664474                                 | 154.937316                             |
| 106.7842697                                     | 25.25168539                                      | 538.411236                                  | 500.7475016                            |
| 32.20833333                                     | 5.041666667                                      | 9.427083333                                 | 4.317599826                            |
| 131.756871                                      | 22.28118393                                      | 37.43551797                                 | 26.65547157                            |
| 45.64556962                                     | 6.544303797                                      | 10.93670886                                 | 4.718314373                            |
| 331.6575592                                     | 47.7996357                                       | 34.60564663                                 | 26.12789689                            |
| 78.3936493                                      | 8.81042654                                       | 8.265402844                                 | 3.797488825                            |
| 183.2296651                                     | 31.18819777                                      | 41.89952153                                 | 31.61251396                            |
| 304.8220503                                     | 48.9303675                                       | 29.51644101                                 | 20.87261354                            |
| 134.0612245                                     | 19.23129252                                      | 14.47845805                                 | 7.924393643                            |
| 318.0050083                                     | 64.47746244                                      | 144.0767947                                 | 125.4674374                            |
| 319.815625                                      | 78.3171875                                       | 309.9171875                                 | 282.3874902                            |
| 443.9057929                                     | 81.80631949                                      | 1108.616735                                 | 1079.763053                            |
| 162.312369                                      | 19.44444444                                      | 11.08595388                                 | 5.612119774                            |
| 111.9226933                                     | 20.4563591                                       | 17.72319202                                 | 9.963980324                            |
| 82.62055336                                     | 11.11067194                                      | 12.1027668                                  | 6.289521786                            |
| 154.3240901                                     | 28.86828423                                      | 31.44887348                                 | 22.10244827                            |
| 224.7178218                                     | 46.03960396                                      | 52.25247525                                 | 39.84603838                            |
| 94                                              | 10.01574803                                      | 6.716535433                                 | 2.779279559                            |
| 164.6750484                                     | 26.12572534                                      | 14.94970986                                 | 8.221857241                            |
| 225.1408115                                     | 38.63961814                                      | 44.33174224                                 | 33.23123587                            |
| 10.31707317                                     | 3.195121951                                      | 29.92682927                                 | 17.41939322                            |
| 231.3852184                                     | 49.30235162                                      | 63.86674132                                 | 49.44715963                            |
| 237.0324215                                     | 54.52380952                                      | 414.0790274                                 | 383.2973293                            |
| 115.6186186                                     | 14.66966967                                      | 12.26426426                                 | 6.805796788                            |
| 239.5352518                                     | 27.60719424                                      | 10.09208633                                 | 5.105379639                            |
| 28.75342466                                     | 4.342465753                                      | 16.64383562                                 | 10.35954213                            |
| 17.73913043                                     | 2.826086957                                      | 9.5                                         | 4.289697543                            |
| 305.516129                                      | 47.0341556                                       | 226.1508539                                 | 211.9277938                            |
| 112.1428571                                     | 14.1038961                                       | 12.51298701                                 | 7.25877045                             |
| 65.70909091                                     | 14.73636364                                      | 104.2727273                                 | 82.69247934                            |
| 242.3347686                                     | 49.17007535                                      | 141.883746                                  | 122.5010052                            |
| 363.1266825                                     | 69.57957245                                      | 349.3903405                                 | 328.2580115                            |
| 56.39568345                                     | 5.273381295                                      | 5.043165468                                 | 1.730241706                            |
| 101.802168                                      | 16.10569106                                      | 39.32791328                                 | 28.46829856                            |
| 17.07142857                                     | 4.142857143                                      | 7.803571429                                 | 2.979272959                            |
| 24.95959596                                     | 6.373737374                                      | 40.67676768                                 | 26.02101826                            |
| 91.30656934                                     | 11.59854015                                      | 33.69708029                                 | 25.02255048                            |

| log.sigma.5.0.mm.3D_glszm_ZonePercentage | log.sigma.5.0.mm.3D_glszm_LargeAreaLowGrayLevelEmphasis | log.sigma.5.0.mm.3D_glszm_LargeAreaHighGrayLevelEmphasis | log.sigma.5.0.mm.3D_glszm_HighGrayLevelZoneEmphasis |
|------------------------------------------|---------------------------------------------------------|----------------------------------------------------------|-----------------------------------------------------|
| 0.413597734                              | 0.141027359                                             | 3158.25                                                  | 358.4486301                                         |
| 0.236398652                              | 1.12526434                                              | 30409.24847                                              | 267.6232179                                         |
| 0.32718894                               | 0.304830185                                             | 2769.373239                                              | 187.7112676                                         |
| 0.323719165                              | 0.146003904                                             | 12912.70457                                              | 367.2708089                                         |
| 0.39275766                               | 0.075726159                                             | 5258.780142                                              | 399.4397163                                         |
| 0.306376361                              | 0.312653746                                             | 4439.700508                                              | 224.0304569                                         |
| 0.225519288                              | 2.375997814                                             | 3411.578947                                              | 121.0131579                                         |
| 0.446107784                              | 0.11292845                                              | 2973.552573                                              | 379.1319911                                         |
| 0.354497354                              | 0.11355454                                              | 8051.537313                                              | 471.5671642                                         |
| 0.269205939                              | 0.821765966                                             | 10903.88249                                              | 253.5131894                                         |
| 0.337363966                              | 0.17796282                                              | 4890.856631                                              | 246.4265233                                         |
| 0.287449393                              | 0.546007816                                             | 6205.396714                                              | 230.0657277                                         |
| 0.223722276                              | 1.608317652                                             | 11990.29741                                              | 184.4849138                                         |
| 0.319320215                              | 0.142540107                                             | 6593.932773                                              | 293.5658263                                         |
| 0.317233809                              | 0.179302675                                             | 5526.747405                                              | 288.8685121                                         |
| 0.129120484                              | 14.51000781                                             | 834119.0357                                              | 316.090301                                          |
| 0.376790831                              | 0.293175076                                             | 5033.285171                                              | 309.1673004                                         |
| 0.338336192                              | 0.658579614                                             | 4755.040558                                              | 292.5931559                                         |
| 0.388316151                              | 0.086117185                                             | 5880.163717                                              | 450.8849558                                         |
| 0.187076044                              | 3.43644379                                              | 27372.26336                                              | 182.3301527                                         |
| 0.162901991                              | 4.948819508                                             | 101411.8895                                              | 249.2056404                                         |
| 0.289534884                              | 0.461079472                                             | 5560.688755                                              | 245.1706827                                         |
| 0.260344196                              | 0.458065067                                             | 13007.19128                                              | 312.5710267                                         |
| 0.343035343                              | 0.267410616                                             | 5713.10303                                               | 227.0848485                                         |
| 0.249169435                              | 1.660698046                                             | 6221.636667                                              | 140.75                                              |
| 0.417867435                              | 0.165926523                                             | 2329.424138                                              | 291.0034483                                         |
| 0.139642239                              | 7.444841967                                             | 156158.4773                                              | 246.7541322                                         |
| 0.278436846                              | 0.823304477                                             | 4566.110276                                              | 202.1829574                                         |
| 0.395467422                              | 0.094702586                                             | 4277.26361                                               | 284.4040115                                         |
| 0.245476003                              | 1.052437856                                             | 33446.24038                                              | 261.8365385                                         |
| 0.256684492                              | 1.980395193                                             | 11389.79412                                              | 208.1568627                                         |
| 0.247386172                              | 0.842340627                                             | 24414.48943                                              | 314.9107021                                         |
| 0.309394983                              | 0.20883558                                              | 8589.837838                                              | 308.5151033                                         |
| 0.442307692                              | 0.330363667                                             | 984.0217391                                              | 136.4782609                                         |
| 0.358433735                              | 0.113138983                                             | 4485.714286                                              | 285.8067227                                         |
| 0.346039604                              | 0.178837252                                             | 5465.646638                                              | 269.9456366                                         |
| 0.305555556                              | 0.793560881                                             | 4546.697727                                              | 232.1431818                                         |
| 0.196183661                              | 2.446540133                                             | 35488.7234                                               | 183.9133739                                         |
| 0.249101796                              | 0.287567071                                             | 27829.24519                                              | 325.5096154                                         |
| 0.378455672                              | 0.290717191                                             | 5192.465995                                              | 282.4382872                                         |
| 0.241519674                              | 0.666560721                                             | 28384.42135                                              | 309.1629213                                         |
| 0.390346275                              | 0.133725873                                             | 4175.965054                                              | 337.4032258                                         |
| 0.361144945                              | 0.158727872                                             | 4777.716695                                              | 273.2765599                                         |
| 0.415609756                              | 0.179062444                                             | 3452.2723                                                | 343.0460009                                         |
| 0.287539936                              | 0.380393817                                             | 8923.831481                                              | 254.1555556                                         |
| 0.203321364                              | 8.494867754                                             | 11287.24724                                              | 132.1412804                                         |
| 0.245428973                              | 0.570769284                                             | 19163.42216                                              | 282.2932187                                         |
| 0.401372213                              | 0.20211354                                              | 2841.166667                                              | 255.3076923                                         |
| 0.410447761                              | 0.230827905                                             | 1169.090909                                              | 170.7090909                                         |
| 0.410462777                              | 0.068035411                                             | 6141.764706                                              | 475.9411765                                         |
| 0.242698598                              | 1.056190687                                             | 14789.1769                                               | 239.5824308                                         |
| 0.407496977                              | 0.269644737                                             | 2787.673591                                              | 238.4540059                                         |
| 0.303323737                              | 0.372960527                                             | 10537.5522                                               | 301.8093184                                         |
| 0.289340102                              | 0.367172825                                             | 5971.80117                                               | 222.7134503                                         |
| 0.200674536                              | 8.09736087                                              | 180960.3934                                              | 227.2964095                                         |
| 0.437997725                              | 0.074474625                                             | 3082.01039                                               | 362.5220779                                         |
| 0.384404925                              | 0.145801992                                             | 4490.492289                                              | 338.059312                                          |
| 0.339520495                              | 0.089073629                                             | 19968.71298                                              | 493.4123007                                         |
| 0.316953317                              | 0.51083744                                              | 4727.988372                                              | 264.0542636                                         |
| 0.309875142                              | 0.599626412                                             | 3588.424908                                              | 181.7326007                                         |
| 0.356300142                              | 1.01773438                                              | 3400.919205                                              | 267.6304636                                         |
| 0.311792625                              | 0.374668217                                             | 15002.99356                                              | 305.691452                                          |
| 0.196763754                              | 2.189559926                                             | 19370.6875                                               | 171.9638158                                         |
| 0.162943977                              | 4.102314994                                             | 80067.28989                                              | 242.8314607                                         |
| 0.442396313                              | 0.147113948                                             | 1737.104167                                              | 226.2708333                                         |
| 0.304571797                              | 0.308319348                                             | 6458.150106                                              | 258.8520085                                         |
| 0.401015228                              | 0.131534202                                             | 4038.987342                                              | 395.4746835                                         |
| 0.343446982                              | 0.423343134                                             | 6728.916211                                              | 288.9489982                                         |
| 0.47309417                               | 0.119308306                                             | 2624.611374                                              | 351.7677725                                         |
| 0.311785182                              | 0.659220365                                             | 4870.91547                                               | 234.8835726                                         |
| 0.340131579                              | 0.370161672                                             | 4530.760155                                              | 265.9235977                                         |
| 0.39061116                               | 0.196179924                                             | 3285.505669                                              | 297.8866213                                         |
| 0.231811146                              | 1.710115351                                             | 17486.29883                                              | 218.4015025                                         |
| 0.190589637                              | 2.178086813                                             | 5505.146797                                              | 291.2328125                                         |
| 0.186165577                              | 7.279417659                                             | 175925.1492                                              | 235.6606202                                         |
| 0.427419355                              | 0.07648993                                              | 4073.712788                                              | 405.3102725                                         |
| 0.358997314                              | 0.27959375                                              | 2830.194514                                              | 236.2418953                                         |
| 0.414754098                              | 0.304049663                                             | 2523.881423                                              | 294.9169966                                         |
| 0.327097506                              | 0.946873613                                             | 3085.571924                                              | 203.745234                                          |
| 0.283907238                              | 0.299664348                                             | 11246.71782                                              | 347.4740099                                         |
| 0.503968254                              | 0.110397351                                             | 2039.047244                                              | 382.7716535                                         |
| 0.385533184                              | 0.140439106                                             | 3785.862669                                              | 258.7079304                                         |
| 0.300143266                              | 0.216117914                                             | 11753.4821                                               | 323.3699284                                         |
| 0.282758621                              | 0.494231437                                             | 2703.585366                                              | 117.5365854                                         |
| 0.263344146                              | 1.015750344                                             | 6567.319149                                              | 200.8174692                                         |
| 0.180241052                              | 3.384690339                                             | 57533.30598                                              | 252.0202634                                         |
| 0.428020566                              | 0.235287975                                             | 2304.72973                                               | 283.1651652                                         |
| 0.447809278                              | 0.026683152                                             | 6337.736691                                              | 620.9568345                                         |
| 0.398907104                              | 0.165888062                                             | 3002.90411                                               | 193.7260274                                         |
| 0.438095238                              | 0.254561472                                             | 882.1521739                                              | 155.673913                                          |
| 0.265157233                              | 0.763993734                                             | 71217.1129                                               | 410.5009488                                         |
| 0.436260623                              | 0.621666795                                             | 1401.876623                                              | 251.3506494                                         |
| 0.215264188                              | 2.878412015                                             | 8184.159091                                              | 127.8227273                                         |
| 0.227139364                              | 1.534668948                                             | 18292.42519                                              | 203.9354144                                         |
| 0.217533586                              | 4.273084194                                             | 45478.75059                                              | 180.6191607                                         |
| 0.549407115                              | 0.066265098                                             | 2304.215827                                              | 440.8920863                                         |
| 0.303453947                              | 0.256444662                                             | 9796.867209                                              | 285.3306434                                         |
| 0.455284553                              | 0.958513369                                             | 515.1607143                                              | 109.0178571                                         |
| 0.26121372                               | 0.396368843                                             | 8208.787879                                              | 200.7171717                                         |
| 0.33952912                               | 0.550080903                                             | 6403.328467                                              | 321.1094891                                         |

| log.sigma.5.0.mm.3D_glszm_SmallAreaEmphasis | log.sigma.5.0.mm.3D_glszm_LowGrayLevelZoneEmphasis | log.sigma.5.0.mm.3D_glszm_ZoneEntropy | log.sigma.5.0.mm.3D_glszm_SmallAreaLowGrayLevelEmphasis |
|---------------------------------------------|----------------------------------------------------|---------------------------------------|---------------------------------------------------------|
| 0.582541509                                 | 0.010761816                                        | 6.373668493                           | 0.00661053                                              |
| 0.551874318                                 | 0.011256583                                        | 6.556943865                           | 0.006567554                                             |
| 0.496103271                                 | 0.018371149                                        | 5.83595412                            | 0.011763569                                             |
| 0.549204529                                 | 0.006145651                                        | 6.812073818                           | 0.003925137                                             |
| 0.548282267                                 | 0.012759567                                        | 6.113535108                           | 0.009420598                                             |
| 0.466221716                                 | 0.015865206                                        | 6.298912371                           | 0.009398836                                             |
| 0.481974549                                 | 0.029490381                                        | 5.30734931                            | 0.005515905                                             |
| 0.604064986                                 | 0.013469556                                        | 6.636617867                           | 0.01001198                                              |
| 0.567251485                                 | 0.005675231                                        | 6.802207518                           | 0.003510642                                             |
| 0.54911558                                  | 0.009236469                                        | 6.627381525                           | 0.004314121                                             |
| 0.529055977                                 | 0.015815964                                        | 6.4368184                             | 0.010993691                                             |
| 0.523763229                                 | 0.013886981                                        | 6.67698763                            | 0.006203298                                             |
| 0.475475208                                 | 0.026310957                                        | 6.731454583                           | 0.011535754                                             |
| 0.522963377                                 | 0.010004399                                        | 6.528790375                           | 0.006066877                                             |
| 0.539502039                                 | 0.011255922                                        | 6.506171248                           | 0.006785403                                             |
| 0.5222479                                   | 0.007114799                                        | 6.823038012                           | 0.004050763                                             |
| 0.551831555                                 | 0.01222985                                         | 6.205407213                           | 0.004036865                                             |
| 0.561597295                                 | 0.013362108                                        | 6.722951487                           | 0.00711674                                              |
| 0.566171232                                 | 0.010711117                                        | 6.317479047                           | 0.004404328                                             |
| 0.497839718                                 | 0.015445176                                        | 6.66722642                            | 0.006718744                                             |
| 0.500471128                                 | 0.009831414                                        | 6.682471988                           | 0.00591615                                              |
| 0.513118334                                 | 0.01114755                                         | 6.649315688                           | 0.004666228                                             |
| 0.522481316                                 | 0.007300227                                        | 6.708734894                           | 0.004087764                                             |
| 0.559600225                                 | 0.019140656                                        | 5.984089603                           | 0.008988455                                             |
| 0.574346499                                 | 0.019853834                                        | 6.024249804                           | 0.010151649                                             |
| 0.602136247                                 | 0.012182265                                        | 6.220706377                           | 0.005088131                                             |
| 0.543457943                                 | 0.014157585                                        | 6.627922033                           | 0.006946858                                             |
| 0.489705559                                 | 0.015162686                                        | 6.496362455                           | 0.005290956                                             |
| 0.573984634                                 | 0.01085821                                         | 6.535291641                           | 0.007428431                                             |
| 0.554359317                                 | 0.012613258                                        | 6.608545381                           | 0.004354039                                             |
| 0.534263536                                 | 0.010625672                                        | 6.507296959                           | 0.00513689                                              |
| 0.52953612                                  | 0.006523344                                        | 6.949948439                           | 0.003414991                                             |
| 0.538188417                                 | 0.009323047                                        | 6.806747662                           | 0.003972726                                             |
| 0.616950113                                 | 0.044355263                                        | 4.854977445                           | 0.017302542                                             |
| 0.553558078                                 | 0.017947554                                        | 5.869144549                           | 0.014191305                                             |
| 0.542907459                                 | 0.012278765                                        | 6.751430622                           | 0.007823298                                             |
| 0.56878861                                  | 0.012352413                                        | 6.719088026                           | 0.005510808                                             |
| 0.49784271                                  | 0.015359471                                        | 6.735144766                           | 0.008182963                                             |
| 0.503190603                                 | 0.014289222                                        | 6.448979321                           | 0.009613472                                             |
| 0.606313442                                 | 0.011482192                                        | 6.397156062                           | 0.007587598                                             |
| 0.518002244                                 | 0.009632798                                        | 6.534882348                           | 0.006343226                                             |
| 0.566345079                                 | 0.010235997                                        | 6.527931063                           | 0.004513797                                             |
| 0.549080809                                 | 0.010601029                                        | 6.549372321                           | 0.006680469                                             |
| 0.58684411                                  | 0.011021632                                        | 6.546030143                           | 0.004739156                                             |
| 0.535992153                                 | 0.01205159                                         | 6.789064569                           | 0.005654981                                             |
| 0.546941867                                 | 0.024771134                                        | 6.289373682                           | 0.011475813                                             |
| 0.538651623                                 | 0.008732508                                        | 6.941610452                           | 0.004336464                                             |
| 0.554165434                                 | 0.016292149                                        | 6.137667136                           | 0.00774845                                              |
| 0.547438524                                 | 0.034916639                                        | 5.085638577                           | 0.011036388                                             |
| 0.60417973                                  | 0.012283562                                        | 6.394972156                           | 0.009051374                                             |
| 0.520763634                                 | 0.011618338                                        | 6.85519048                            | 0.006346841                                             |
| 0.575968177                                 | 0.013499343                                        | 6.184352652                           | 0.008049338                                             |
| 0.541126846                                 | 0.009390135                                        | 6.867491897                           | 0.005032675                                             |
| 0.507342607                                 | 0.018405856                                        | 6.219904562                           | 0.007595789                                             |
| 0.567939432                                 | 0.009858407                                        | 6.669368273                           | 0.004958462                                             |
| 0.621015761                                 | 0.009227573                                        | 6.395754763                           | 0.006120159                                             |
| 0.601974019                                 | 0.007399119                                        | 6.625362859                           | 0.004775671                                             |
| 0.579567031                                 | 0.006219746                                        | 6.642702739                           | 0.004745843                                             |
| 0.55541266                                  | 0.013175546                                        | 6.258759186                           | 0.007997474                                             |
| 0.485322667                                 | 0.017055504                                        | 6.306048627                           | 0.006260544                                             |
| 0.591185633                                 | 0.01277282                                         | 6.525791948                           | 0.005328249                                             |
| 0.570024068                                 | 0.00827772                                         | 6.892754642                           | 0.004486971                                             |
| 0.487026198                                 | 0.015909763                                        | 6.779943028                           | 0.008674622                                             |
| 0.486871205                                 | 0.010108462                                        | 6.556918512                           | 0.004005355                                             |
| 0.590648717                                 | 0.023117943                                        | 5.548235548                           | 0.015422857                                             |
| 0.538898545                                 | 0.011764651                                        | 6.665573282                           | 0.007613952                                             |
| 0.546369988                                 | 0.013725115                                        | 6.258637179                           | 0.003511184                                             |
| 0.56374442                                  | 0.010949123                                        | 6.821350317                           | 0.005316268                                             |
| 0.630145102                                 | 0.017570256                                        | 6.161825152                           | 0.013989354                                             |
| 0.554958778                                 | 0.012826878                                        | 6.621957332                           | 0.006117579                                             |
| 0.554227437                                 | 0.010674086                                        | 6.722272371                           | 0.004682601                                             |
| 0.562720782                                 | 0.01267556                                         | 6.610048102                           | 0.006541858                                             |
| 0.525106454                                 | 0.011257283                                        | 6.812830079                           | 0.005019362                                             |
| 0.506249245                                 | 0.006103445                                        | 6.753363445                           | 0.003183765                                             |
| 0.520734334                                 | 0.011586005                                        | 7.109343767                           | 0.006790761                                             |
| 0.60166436                                  | 0.008513034                                        | 6.621805519                           | 0.004226656                                             |
| 0.537879532                                 | 0.014287254                                        | 6.452808452                           | 0.008536097                                             |
| 0.588911649                                 | 0.018045774                                        | 6.323450031                           | 0.009355456                                             |
| 0.524430764                                 | 0.025793204                                        | 6.651222618                           | 0.009636465                                             |
| 0.540129348                                 | 0.006069845                                        | 6.625422836                           | 0.002650802                                             |
| 0.624591896                                 | 0.012908067                                        | 6.207798515                           | 0.004749764                                             |
| 0.580787337                                 | 0.013009208                                        | 6.421282411                           | 0.009170138                                             |
| 0.52960708                                  | 0.007051912                                        | 6.895697366                           | 0.00422449                                              |
| 0.504567125                                 | 0.045555829                                        | 4.900115724                           | 0.032365755                                             |
| 0.519935038                                 | 0.014114344                                        | 6.781328953                           | 0.008035814                                             |
| 0.494253836                                 | 0.008582656                                        | 6.857102887                           | 0.003903322                                             |
| 0.607095966                                 | 0.013053082                                        | 6.282018257                           | 0.005388057                                             |
| 0.603708674                                 | 0.004350855                                        | 6.681009134                           | 0.003252025                                             |
| 0.648814281                                 | 0.02784249                                         | 5.249698662                           | 0.023194695                                             |
| 0.637000302                                 | 0.041149338                                        | 4.906941783                           | 0.029526745                                             |
| 0.552732423                                 | 0.00539899                                         | 6.913979613                           | 0.003392581                                             |
| 0.613119056                                 | 0.018055733                                        | 6.145579971                           | 0.009348768                                             |
| 0.566087118                                 | 0.030917549                                        | 6.057120565                           | 0.012338474                                             |
| 0.521311433                                 | 0.014020154                                        | 6.847292508                           | 0.006937726                                             |
| 0.551928008                                 | 0.018959302                                        | 6.722128832                           | 0.009601346                                             |
| 0.654752198                                 | 0.01437945                                         | 5.909212771                           | 0.006145404                                             |
| 0.534813507                                 | 0.012186204                                        | 6.635578832                           | 0.005386507                                             |
| 0.544701151                                 | 0.040464837                                        | 4.930222503                           | 0.008617528                                             |
| 0.513261907                                 | 0.022500662                                        | 5.705276383                           | 0.006037815                                             |
| 0.590130603                                 | 0.015364911                                        | 6.313696985                           | 0.007435071                                             |



| log.sigma.5.0.mm.3D_ngtdm_Coarseness | log.sigma.5.0.mm.3D_ngtdm_Complexity | log.sigma.5.0.mm.3D_ngtdm_Strength | log.sigma.5.0.mm.3D_ngtdm_Busyness | log.sigma.5.0.mm.3D_ngtdm_Contrast |
|--------------------------------------|--------------------------------------|------------------------------------|------------------------------------|------------------------------------|
| 0.018813704                          | 1.143593261                          | 6.049534445                        | 0.12101205                         | 0.000242449                        |
| 0.006993386                          | 0.223954272                          | 1.82858884                         | 0.355631408                        | 3.73E-05                           |
| 0.026493736                          | 0.660879961                          | 3.825402883                        | 0.181036081                        | 0.000301057                        |
| 0.005104302                          | 0.28545208                           | 1.739651612                        | 0.325478635                        | 3.68E-05                           |
| 0.03638593                           | 1.81476675                           | 10.7760007                         | 0.059835839                        | 0.00056621                         |
| 0.016721068                          | 0.734842898                          | 3.568791494                        | 0.171995825                        | 0.00021061                         |
| 0.038863285                          | 0.349749426                          | 3.332853491                        | 0.271185373                        | 0.00038253                         |
| 0.012086056                          | 1.063232581                          | 4.503879749                        | 0.159227806                        | 0.000203114                        |
| 0.0065193                            | 0.508326415                          | 2.792895654                        | 0.225024477                        | 5.65E-05                           |
| 0.004369043                          | 0.178758072                          | 1.330534818                        | 0.59496335                         | 2.52E-05                           |
| 0.011501962                          | 0.797663965                          | 2.961787791                        | 0.210274311                        | 0.000203904                        |
| 0.009680967                          | 0.38444642                           | 2.778933618                        | 0.299156713                        | 7.31E-05                           |
| 0.006749578                          | 0.18264933                           | 1.4785515                          | 0.681423731                        | 6.48E-05                           |
| 0.011003558                          | 0.463565177                          | 2.790861098                        | 0.203661573                        | 0.000109833                        |
| 0.014754638                          | 0.745385026                          | 4.74546063                         | 0.140177852                        | 0.000104953                        |
| 0.002427844                          | 0.054926098                          | 1.019124382                        | 0.580040405                        | 3.17E-06                           |
| 0.017416766                          | 0.924655233                          | 4.785428003                        | 0.126471617                        | 0.000209189                        |
| 0.005608788                          | 0.320737785                          | 1.845623994                        | 0.512469939                        | 6.03E-05                           |
| 0.020078889                          | 1.52916246                           | 7.676127147                        | 0.071027286                        | 0.000281174                        |
| 0.004890971                          | 0.116170667                          | 1.020768474                        | 0.761241369                        | 2.55E-05                           |
| 0.002697114                          | 0.079162293                          | 0.836180563                        | 0.798681256                        | 7.25E-06                           |
| 0.00717111                           | 0.454649139                          | 2.964948799                        | 0.30303077                         | 4.89E-05                           |
| 0.004744927                          | 0.227289697                          | 1.713172504                        | 0.39555406                         | 2.31E-05                           |
| 0.026304687                          | 0.893324216                          | 5.372515362                        | 0.117602097                        | 0.000342681                        |
| 0.009768574                          | 0.197316795                          | 1.321396076                        | 0.588182099                        | 7.86E-05                           |
| 0.016917428                          | 1.027469006                          | 4.410137109                        | 0.167605487                        | 0.00023138                         |
| 0.004684431                          | 0.092634239                          | 1.323957161                        | 0.499318881                        | 1.10E-05                           |
| 0.008694799                          | 0.288662431                          | 1.90827602                         | 0.439280936                        | 7.67E-05                           |
| 0.005895115                          | 0.393709661                          | 1.593663842                        | 0.42104792                         | 0.000101601                        |
| 0.00579058                           | 0.200232947                          | 1.649487715                        | 0.394054055                        | 2.94E-05                           |
| 0.003798782                          | 0.138020073                          | 0.980014309                        | 0.864611479                        | 2.39E-05                           |
| 0.002313305                          | 0.133102014                          | 1.048550376                        | 0.744802781                        | 1.09E-05                           |
| 0.006762987                          | 0.339640915                          | 2.126351302                        | 0.315568551                        | 5.86E-05                           |
| 0.079856383                          | 2.843540801                          | 10.71793087                        | 0.075375504                        | 0.002322117                        |
| 0.030314772                          | 1.567989357                          | 7.877255195                        | 0.073986358                        | 0.000406697                        |
| 0.005688595                          | 0.338848789                          | 1.639931803                        | 0.422861756                        | 7.37E-05                           |
| 0.004188617                          | 0.296753627                          | 1.906962576                        | 0.641471312                        | 3.39E-05                           |
| 0.004100597                          | 0.095217793                          | 0.830391521                        | 0.837030712                        | 2.66E-05                           |
| 0.014954043                          | 0.728349749                          | 5.711377555                        | 0.09808175                         | 9.10E-05                           |
| 0.011755234                          | 0.682820385                          | 3.417430421                        | 0.194329412                        | 0.0001266                          |
| 0.010211308                          | 0.385759865                          | 3.465507659                        | 0.188876212                        | 4.41E-05                           |
| 0.012056318                          | 0.957930078                          | 4.173830255                        | 0.161003614                        | 0.000193904                        |
| 0.006549219                          | 0.445400645                          | 1.891429774                        | 0.342072063                        | 9.44E-05                           |
| 0.012371149                          | 0.829925259                          | 4.031178933                        | 0.170719083                        | 0.000173903                        |
| 0.007030057                          | 0.287220924                          | 1.820058294                        | 0.406346436                        | 6.28E-05                           |
| 0.005215894                          | 0.135192767                          | 1.204548551                        | 1.175844123                        | 3.40E-05                           |
| 0.003381292                          | 0.133146799                          | 1.039670215                        | 0.629627667                        | 1.78E-05                           |
| 0.018171693                          | 1.041815144                          | 4.542566044                        | 0.146806808                        | 0.00030974                         |
| 0.072104347                          | 1.978292238                          | 8.360654864                        | 0.077563346                        | 0.00133047                         |
| 0.023391393                          | 2.767917572                          | 13.16787554                        | 0.045085029                        | 0.00025845                         |
| 0.003965555                          | 0.144086411                          | 1.120208376                        | 0.678741515                        | 2.36E-05                           |
| 0.0101934                            | 0.700509077                          | 2.225377812                        | 0.315345877                        | 0.000322745                        |
| 0.003343218                          | 0.224496596                          | 1.310712457                        | 0.589064244                        | 2.41E-05                           |
| 0.023202874                          | 0.641204544                          | 4.57936491                         | 0.126620516                        | 0.000169838                        |
| 0.002244115                          | 0.066213608                          | 0.674900089                        | 1.076458717                        | 8.37E-06                           |
| 0.014278977                          | 1.00819297                           | 4.767084848                        | 0.132680619                        | 0.000170783                        |
| 0.005294088                          | 0.41404541                           | 1.777312807                        | 0.375240629                        | 6.32E-05                           |
| 0.009082381                          | 0.811981496                          | 4.587229886                        | 0.118678229                        | 7.71E-05                           |
| 0.017003361                          | 0.563628386                          | 4.098582065                        | 0.180392375                        | 0.000144379                        |
| 0.01257421                           | 0.366463017                          | 2.049227174                        | 0.326103745                        | 0.000154978                        |
| 0.005352475                          | 0.38023307                           | 1.772144456                        | 0.593615398                        | 7.84E-05                           |
| 0.002498705                          | 0.167558115                          | 1.149603674                        | 0.695667174                        | 1.61E-05                           |
| 0.004523553                          | 0.120394201                          | 1.238128312                        | 0.640469478                        | 1.53E-05                           |
| 0.005136023                          | 0.122876526                          | 1.128007928                        | 0.55610053                         | 2.02E-05                           |
| 0.049691135                          | 2.100071074                          | 9.592641529                        | 0.074684911                        | 0.000936645                        |
| 0.009297846                          | 0.38017298                           | 2.883697233                        | 0.271805814                        | 5.78E-05                           |
| 0.029764479                          | 2.150733966                          | 9.437321553                        | 0.062199301                        | 0.000496803                        |
| 0.003870842                          | 0.250831128                          | 1.244035916                        | 0.664092408                        | 4.97E-05                           |
| 0.023212406                          | 1.906542377                          | 7.172461311                        | 0.085911181                        | 0.000491142                        |
| 0.006615066                          | 0.272324989                          | 1.744493549                        | 0.479984551                        | 5.59E-05                           |
| 0.004058659                          | 0.235204903                          | 1.271893722                        | 0.695353934                        | 4.19E-05                           |
| 0.009904077                          | 0.710827042                          | 2.917660701                        | 0.266063847                        | 0.000177834                        |
| 0.002529446                          | 0.11239972                           | 0.834742379                        | 1.064270211                        | 1.38E-05                           |
| 0.002077018                          | 0.08030094                           | 0.711600138                        | 0.948688681                        | 6.89E-06                           |
| 0.001637023                          | 0.052682816                          | 0.609941961                        | 1.314240665                        | 5.37E-06                           |
| 0.01042283                           | 1.162424158                          | 4.945481271                        | 0.132852056                        | 0.000124311                        |
| 0.010420562                          | 0.56721971                           | 2.912853549                        | 0.260364127                        | 0.000117584                        |
| 0.018083086                          | 1.379482988                          | 5.247178216                        | 0.146345314                        | 0.00035194                         |
| 0.006253395                          | 0.353143365                          | 1.606805927                        | 0.60642175                         | 9.52E-05                           |
| 0.004535466                          | 0.214756603                          | 1.461717686                        | 0.419313273                        | 2.51E-05                           |
| 0.020036858                          | 2.492544224                          | 7.674144643                        | 0.090592837                        | 0.000496185                        |
| 0.008445116                          | 0.524242035                          | 2.545185464                        | 0.269789486                        | 0.000100071                        |
| 0.005353971                          | 0.251561929                          | 1.916663375                        | 0.357572341                        | 3.23E-05                           |
| 0.061043966                          | 1.12090472                           | 5.433480992                        | 0.108960419                        | 0.000818726                        |
| 0.003663496                          | 0.151309249                          | 0.978571946                        | 0.921193199                        | 2.77E-05                           |
| 0.002593036                          | 0.072347976                          | 0.704178122                        | 1.005918301                        | 1.04E-05                           |
| 0.014634916                          | 1.129333141                          | 4.843489856                        | 0.18419762                         | 0.000242182                        |
| 0.006841006                          | 0.837539786                          | 3.201840719                        | 0.172657312                        | 0.000123512                        |
| 0.059054218                          | 1.300330104                          | 8.293987282                        | 0.08463096                         | 0.01022931                         |
| 0.086359948                          | 3.224171445                          | 13.93755842                        | 0.064432507                        | 0.001677881                        |
| 0.003718162                          | 0.199160969                          | 1.428531805                        | 0.387485872                        | 1.86E-05                           |
| 0.01593267                           | 1.336160012                          | 5.620262699                        | 0.188897037                        | 0.000256467                        |
| 0.014525893                          | 0.194889068                          | 1.947088587                        | 0.446632477                        | 8.96E-05                           |
| 0.003179763                          | 0.125464177                          | 0.949503548                        | 0.860242985                        | 1.78E-05                           |
| 0.002239497                          | 0.074350131                          | 0.583208703                        | 1.484702717                        | 1.39E-05                           |
| 0.039204637                          | 4.185526595                          | 16.18312528                        | 0.040352407                        | 0.0011408                          |
| 0.011797759                          | 0.420798582                          | 2.898011113                        | 0.209186602                        | 9.93E-05                           |
| 0.063519788                          | 1.729909051                          | 5.53259482                         | 0.168911763                        | 0.002297044                        |
| 0.033878886                          | 0.720749                             | 5.821534904                        | 0.098254888                        | 0.000270767                        |
| 0.017978551                          | 0.872085713                          | 6.463544849                        | 0.131529534                        | 0.000158987                        |

| log.sigma.4.5.mm.3D_gldm_GrayLevelVariance | log.sigma.4.5.mm.3D_gldm_HighGrayLevelEmphasis | log.sigma.4.5.mm.3D_gldm_GrayLevelNonUniformityNormalized | log.sigma.4.5.mm.3D_gldm_DependenceEntropy |
|--------------------------------------------|------------------------------------------------|-----------------------------------------------------------|--------------------------------------------|
| 41.54122295                                | 308.2110482                                    | 0.044848285                                               | 6.645929187                                |
| 22.09175626                                | 179.2397689                                    | 0.065074089                                               | 7.107019174                                |
| 20.59547347                                | 150.6290323                                    | 0.062010236                                               | 6.237738944                                |
| 20.20998254                                | 401.4777989                                    | 0.050494835                                               | 6.942105251                                |
| 45.93834623                                | 399.9860724                                    | 0.043877686                                               | 6.515485035                                |
| 22.54350113                                | 161.9891135                                    | 0.060193639                                               | 6.204374849                                |
| 15.21316556                                | 97.66172107                                    | 0.077794116                                               | 6.096784571                                |
| 49.78340823                                | 350.0548902                                    | 0.040135298                                               | 6.742843807                                |
| 40.89238707                                | 371.4708995                                    | 0.04386729                                                | 6.923730427                                |
| 22.25410509                                | 220.1930278                                    | 0.061500349                                               | 6.919377654                                |
| 27.38564968                                | 225.3542926                                    | 0.056095004                                               | 6.342110455                                |
| 30.04265855                                | 201.6491228                                    | 0.051559788                                               | 6.841300411                                |
| 27.79317704                                | 164.0318226                                    | 0.053991235                                               | 6.905518142                                |
| 27.84529059                                | 260.9400716                                    | 0.05362086                                                | 6.598267268                                |
| 17.13349584                                | 217.428101                                     | 0.055845074                                               | 6.66777176                                 |
| 12.44545569                                | 231.2912048                                    | 0.116667273                                               | 7.167302982                                |
| 33.99602631                                | 257.1088825                                    | 0.049638345                                               | 6.45358537                                 |
| 35.69615724                                | 200.4309605                                    | 0.047589434                                               | 6.96625437                                 |
| 44.19088107                                | 439.257732                                     | 0.046574792                                               | 6.550641387                                |
| 16.53360934                                | 133.1674402                                    | 0.073754324                                               | 6.913657148                                |
| 13.61173017                                | 194.3556662                                    | 0.079599707                                               | 6.9838423                                  |
| 27.02976981                                | 182.7424419                                    | 0.054660627                                               | 6.704701826                                |
| 21.77355856                                | 225.7162212                                    | 0.064555872                                               | 6.747086402                                |
| 31.60039938                                | 294.3638254                                    | 0.050384464                                               | 6.388787091                                |
| 14.40675807                                | 91.02740864                                    | 0.074153431                                               | 6.480397964                                |
| 33.06714614                                | 242.2737752                                    | 0.049236353                                               | 6.557821259                                |
| 14.54023639                                | 208.9278707                                    | 0.090529416                                               | 7.122438972                                |
| 22.44688722                                | 137.7732031                                    | 0.060200469                                               | 6.604050536                                |
| 35.4175753                                 | 296.0067989                                    | 0.046879118                                               | 6.590526596                                |
| 22.65049606                                | 214.5743509                                    | 0.062662146                                               | 7.187907806                                |
| 18.33700417                                | 153.2884555                                    | 0.068365149                                               | 6.676543381                                |
| 24.97301653                                | 225.0595278                                    | 0.059176565                                               | 7.128456798                                |
| 33.2627669                                 | 261.6546975                                    | 0.048304549                                               | 6.872533182                                |
| 28.07683062                                | 178.375                                        | 0.05510355                                                | 5.364921901                                |
| 29.73997496                                | 316.5933735                                    | 0.055341849                                               | 6.159771324                                |
| 32.93237526                                | 266.9920792                                    | 0.048880992                                               | 6.736523678                                |
| 29.42156527                                | 178.7788194                                    | 0.053686343                                               | 6.875953494                                |
| 19.99147619                                | 171.3753727                                    | 0.063330073                                               | 6.974578726                                |
| 25.30305999                                | 301.3005988                                    | 0.06662842                                                | 6.728236415                                |
| 31.24223806                                | 223.6024786                                    | 0.0523182                                                 | 6.638209561                                |
| 22.20582913                                | 259.541384                                     | 0.063171867                                               | 6.916488008                                |
| 43.35009012                                | 303.293809                                     | 0.043587985                                               | 6.589114284                                |
| 32.0119785                                 | 246.2545676                                    | 0.049787773                                               | 6.619029895                                |
| 43.42374872                                | 321.9717073                                    | 0.043120048                                               | 6.742092351                                |
| 27.69693616                                | 223.9504792                                    | 0.053867947                                               | 6.898166669                                |
| 14.50693878                                | 99.05116697                                    | 0.080028864                                               | 6.683675173                                |
| 24.66231038                                | 242.9688233                                    | 0.056121309                                               | 6.962415922                                |
| 31.88441521                                | 200.2161235                                    | 0.050595993                                               | 6.364213387                                |
| 24.21140566                                | 212.761194                                     | 0.061706393                                               | 5.6829599                                  |
| 47.24121793                                | 472.4969819                                    | 0.051305823                                               | 6.392925055                                |
| 22.21857497                                | 190.6571262                                    | 0.060983424                                               | 6.909851667                                |
| 33.59642302                                | 216.5163241                                    | 0.052106286                                               | 6.368734832                                |
| 28.73696944                                | 249.2062287                                    | 0.053979232                                               | 7.019791159                                |
| 21.53881832                                | 203.1725888                                    | 0.06318981                                                | 6.467796593                                |
| 17.8843739                                 | 170.020696                                     | 0.089683554                                               | 7.063550012                                |
| 38.73442906                                | 307.112628                                     | 0.045882887                                               | 6.621409234                                |
| 37.30281006                                | 347.1623347                                    | 0.044563091                                               | 6.766227152                                |
| 34.42546187                                | 463.4887858                                    | 0.054567727                                               | 6.794379746                                |
| 27.67190264                                | 195.0786241                                    | 0.054585298                                               | 6.651807579                                |
| 20.22296663                                | 168.0896708                                    | 0.06175394                                                | 6.3974701                                  |
| 35.7260753                                 | 205.6106654                                    | 0.047893383                                               | 6.75161841                                 |
| 32.62098145                                | 277.8481198                                    | 0.050123225                                               | 7.162809859                                |
| 14.04979724                                | 134.6300971                                    | 0.083649312                                               | 6.838381513                                |
| 15.01469693                                | 200.447089                                     | 0.080861868                                               | 7.016964946                                |
| 31.76504067                                | 234.4009217                                    | 0.052050373                                               | 5.888321139                                |
| 27.69544935                                | 219.2852543                                    | 0.055889583                                               | 6.859654643                                |
| 41.94050993                                | 363.1142132                                    | 0.049112319                                               | 6.309034505                                |
| 38.55378493                                | 244.1626525                                    | 0.045580443                                               | 6.993960928                                |
| 39.32307105                                | 276.8699552                                    | 0.050352913                                               | 6.26647487                                 |
| 27.75978167                                | 168.7916459                                    | 0.053738006                                               | 6.718055865                                |
| 31.98394207                                | 219.6108553                                    | 0.050407072                                               | 6.982926614                                |
| 39.63898698                                | 251.0593446                                    | 0.043851563                                               | 6.590327304                                |
| 20.64683342                                | 160.5982972                                    | 0.064780271                                               | 6.968078092                                |
| 16.9369963                                 | 220.3263848                                    | 0.069816207                                               | 7.074261076                                |
| 19.1045324                                 | 191.6862745                                    | 0.078347193                                               | 7.185601962                                |
| 43.0953739                                 | 378.6810036                                    | 0.043521409                                               | 6.70378509                                 |
| 27.95744613                                | 213.3267681                                    | 0.052560374                                               | 6.572197331                                |
| 41.13457673                                | 230.4                                          | 0.043681806                                               | 6.415831905                                |
| 31.86250681                                | 229.1184807                                    | 0.049031139                                               | 6.729762965                                |
| 22.49307556                                | 267.6366831                                    | 0.059047749                                               | 6.678222669                                |
| 54.70973482                                | 371.1825397                                    | 0.038840073                                               | 6.455123758                                |
| 33.54899929                                | 295.0909769                                    | 0.04790297                                                | 6.599785801                                |
| 29.73509864                                | 333.732808                                     | 0.054036143                                               | 6.928962366                                |
| 15.52028537                                | 167.7448276                                    | 0.082330559                                               | 5.638996812                                |
| 22.61612204                                | 158.8947213                                    | 0.059482397                                               | 6.74683693                                 |
| 17.39763723                                | 193.3668736                                    | 0.073412516                                               | 7.082442028                                |
| 41.3744771                                 | 222.5848329                                    | 0.043701799                                               | 6.57156658                                 |
| 49.01228171                                | 587.0908505                                    | 0.042294944                                               | 6.688941647                                |
| 21.33207919                                | 215.0437158                                    | 0.066977216                                               | 5.84582411                                 |
| 23.62394558                                | 149.7047619                                    | 0.074829932                                               | 5.339218885                                |
| 27.97914551                                | 319.8344654                                    | 0.058638756                                               | 7.194018                                   |
| 40.38498824                                | 179.7988669                                    | 0.044551357                                               | 6.427785737                                |
| 16.71486878                                | 108.5332681                                    | 0.069385457                                               | 6.72474357                                 |
| 20.45623956                                | 197.7366748                                    | 0.063802942                                               | 6.960042553                                |
| 19.65747752                                | 141.7664485                                    | 0.065346122                                               | 7.057901585                                |
| 66.70199503                                | 468.284585                                     | 0.040197472                                               | 6.120271281                                |
| 29.12258632                                | 309.0518092                                    | 0.053052231                                               | 6.754924696                                |
| 22.52787503                                | 124.2113821                                    | 0.061273052                                               | 5.451269156                                |
| 20.48292618                                | 195.5039578                                    | 0.065127645                                               | 6.232648713                                |
| 37.29789067                                | 271.1945477                                    | 0.048628098                                               | 6.95011473                                 |

| log.sigma.4.5.mm.3D_gldm_DependenceNonUniformity | log.sigma.4.5.mm.3D_gldm_GrayLevelNonUniformity | log.sigma.4.5.mm.3D_gldm_SmallDependenceEmphasis |
|--------------------------------------------------|-------------------------------------------------|--------------------------------------------------|
| 167.0538244                                      | 31.66288952                                     | 0.361265658                                      |
| 282.2007703                                      | 135.158883                                      | 0.217315795                                      |
| 90.50230415                                      | 26.9124424                                      | 0.309101498                                      |
| 533.7294118                                      | 133.0538899                                     | 0.274158194                                      |
| 85.70194986                                      | 15.75208914                                     | 0.333803729                                      |
| 153.4385692                                      | 38.70451011                                     | 0.235004523                                      |
| 58.76854599                                      | 26.21661721                                     | 0.188829074                                      |
| 256.9361277                                      | 40.21556886                                     | 0.358549126                                      |
| 454.4699375                                      | 91.2000962                                      | 0.306938179                                      |
| 506.2601679                                      | 190.5280826                                     | 0.248696635                                      |
| 198.8428053                                      | 46.39056832                                     | 0.277698646                                      |
| 289.1592443                                      | 76.41160594                                     | 0.259533699                                      |
| 374.1407907                                      | 111.9778206                                     | 0.205884785                                      |
| 241.940966                                       | 59.94812165                                     | 0.281502345                                      |
| 180.2074643                                      | 50.87486279                                     | 0.276043238                                      |
| 535.0656398                                      | 810.4875486                                     | 0.129262625                                      |
| 172.8108883                                      | 34.64756447                                     | 0.319675847                                      |
| 459.983705                                       | 110.9785592                                     | 0.275060219                                      |
| 146.2199313                                      | 27.10652921                                     | 0.329006902                                      |
| 399.5083899                                      | 206.5858622                                     | 0.186339251                                      |
| 661.3541348                                      | 415.8288668                                     | 0.169537079                                      |
| 340.3488372                                      | 94.01627907                                     | 0.254059726                                      |
| 490.8103259                                      | 176.3020871                                     | 0.24086628                                       |
| 107.5239085                                      | 24.23492723                                     | 0.271480714                                      |
| 195.7857143                                      | 89.2807309                                      | 0.242494211                                      |
| 157.0778098                                      | 34.17002882                                     | 0.329921627                                      |
| 356.5193306                                      | 313.7749567                                     | 0.152306069                                      |
| 259.2623866                                      | 86.26727146                                     | 0.266025451                                      |
| 440.5399433                                      | 82.74164306                                     | 0.36288085                                       |
| 334.8583792                                      | 159.2871755                                     | 0.212076529                                      |
| 517.968229                                       | 217.3328091                                     | 0.238460445                                      |
| 946.7824621                                      | 350.917032                                      | 0.226856393                                      |
| 428.7343827                                      | 98.20314806                                     | 0.272902199                                      |
| 38.34615385                                      | 5.730769231                                     | 0.411258013                                      |
| 82.70481928                                      | 18.37349398                                     | 0.304759036                                      |
| 444.6544554                                      | 98.73960396                                     | 0.287317328                                      |
| 525.2277778                                      | 154.6166667                                     | 0.259842115                                      |
| 517.470483                                       | 212.4090638                                     | 0.191870285                                      |
| 140.4299401                                      | 55.63473054                                     | 0.205287928                                      |
| 226.7006673                                      | 54.88179218                                     | 0.319713771                                      |
| 226.9389417                                      | 93.11533243                                     | 0.207718395                                      |
| 236.3955929                                      | 41.53934942                                     | 0.353555576                                      |
| 393.8708892                                      | 81.75152253                                     | 0.309798593                                      |
| 242.2370732                                      | 44.19804878                                     | 0.32538385                                       |
| 348.627263                                       | 101.1640043                                     | 0.25937944                                       |
| 296.8554758                                      | 178.3043088                                     | 0.198825585                                      |
| 755.846226                                       | 239.4135021                                     | 0.233180183                                      |
| 140.2830189                                      | 29.4974271                                      | 0.330698317                                      |
| 30.7761194                                       | 8.268656716                                     | 0.332989221                                      |
| 123.028169                                       | 25.49899396                                     | 0.346022507                                      |
| 594.0566589                                      | 208.807243                                      | 0.219222914                                      |
| 198.7750907                                      | 43.09189843                                     | 0.330541827                                      |
| 695.7678618                                      | 206.2546454                                     | 0.263706585                                      |
| 116.0829103                                      | 37.34517766                                     | 0.23061455                                       |
| 723.2971026                                      | 585.0058255                                     | 0.1800574                                        |
| 216.8634812                                      | 40.33105802                                     | 0.354192522                                      |
| 511.744186                                       | 97.72685819                                     | 0.348739469                                      |
| 269.0030936                                      | 70.55607115                                     | 0.299029573                                      |
| 152.7248157                                      | 44.43243243                                     | 0.264666387                                      |
| 192.3257662                                      | 54.40522134                                     | 0.241641881                                      |
| 448.0599339                                      | 101.4860783                                     | 0.302603045                                      |
| 1017.16831                                       | 274.5750274                                     | 0.263776396                                      |
| 418.6686084                                      | 258.4763754                                     | 0.189121945                                      |
| 313.6693519                                      | 220.8337605                                     | 0.158279781                                      |
| 61.11059908                                      | 11.29493088                                     | 0.340865335                                      |
| 290.8763683                                      | 86.79652286                                     | 0.282894642                                      |
| 96.1928934                                       | 19.35025381                                     | 0.368666373                                      |
| 666.7829215                                      | 145.7206756                                     | 0.290931667                                      |
| 115.4843049                                      | 22.4573991                                      | 0.396341555                                      |
| 407.6752859                                      | 108.0671308                                     | 0.285016105                                      |
| 578.4552632                                      | 153.2375                                        | 0.288888801                                      |
| 287.5385297                                      | 49.50841453                                     | 0.317077029                                      |
| 794.5789474                                      | 334.7844427                                     | 0.211414743                                      |
| 889.5807028                                      | 468.8856462                                     | 0.186546402                                      |
| 1119.881917                                      | 719.2272331                                     | 0.177770715                                      |
| 264.8799283                                      | 48.56989247                                     | 0.356440631                                      |
| 248.5022381                                      | 58.70993733                                     | 0.285679569                                      |
| 173.704918                                       | 26.64590164                                     | 0.355231302                                      |
| 381.292517                                       | 86.49092971                                     | 0.303519504                                      |
| 550.7104708                                      | 168.0498946                                     | 0.248648768                                      |
| 145.0198413                                      | 19.57539683                                     | 0.429861662                                      |
| 320.5555556                                      | 64.23788218                                     | 0.349928537                                      |
| 520.6196275                                      | 150.8689112                                     | 0.266833338                                      |
| 33.8137931                                       | 11.93793103                                     | 0.303559387                                      |
| 630.8613978                                      | 201.7048068                                     | 0.246904099                                      |
| 737.1267348                                      | 402.0069394                                     | 0.17720472                                       |
| 187.0899743                                      | 34                                              | 0.344546984                                      |
| 403.1713918                                      | 65.64175258                                     | 0.379498844                                      |
| 34.46448087                                      | 12.2568306                                      | 0.328904548                                      |
| 23.8952381                                       | 7.857142857                                     | 0.354685185                                      |
| 606.8344654                                      | 233.0890566                                     | 0.244078081                                      |
| 175.5269122                                      | 31.45325779                                     | 0.391590159                                      |
| 153.0469667                                      | 70.91193738                                     | 0.199639247                                      |
| 668.0415648                                      | 260.9540342                                     | 0.214793862                                      |
| 827.1215983                                      | 379.3995866                                     | 0.203288813                                      |
| 79.90909091                                      | 10.16996047                                     | 0.458875714                                      |
| 235.7302632                                      | 64.51151316                                     | 0.255966856                                      |
| 34.67479675                                      | 7.536585366                                     | 0.379150858                                      |
| 73.32189974                                      | 24.6837731                                      | 0.20717674                                       |
| 136.6158612                                      | 39.24287485                                     | 0.325659156                                      |

| log.sigma.4.5.mm.3D_gldm_DependenceNonUniformityNormalized | log.sigma.4.5.mm.3D_gldm_DependenceVariance | log.sigma.4.5.mm.3D_gldm_LargeDependenceEmphasis |
|------------------------------------------------------------|---------------------------------------------|--------------------------------------------------|
| 0.236620148                                                | 1.827741174                                 | 8.141643059                                      |
| 0.135869413                                                | 8.677093666                                 | 26.07366394                                      |
| 0.208530655                                                | 2.559238888                                 | 10.61751152                                      |
| 0.202553856                                                | 3.079655924                                 | 12.20303605                                      |
| 0.238724094                                                | 1.628028957                                 | 8.181058496                                      |
| 0.23862919                                                 | 1.38728114                                  | 9.818040435                                      |
| 0.174387377                                                | 2.80506124                                  | 15.71810089                                      |
| 0.256423281                                                | 1.272564651                                 | 7.047904192                                      |
| 0.218600259                                                | 2.088933033                                 | 9.677248677                                      |
| 0.163415161                                                | 4.657148597                                 | 16.80568108                                      |
| 0.240438701                                                | 1.43652923                                  | 8.753325272                                      |
| 0.1951142                                                  | 2.78606253                                  | 12.31174089                                      |
| 0.180395753                                                | 2.882224613                                 | 14.54869817                                      |
| 0.216405157                                                | 1.939999552                                 | 10.03041145                                      |
| 0.197812804                                                | 2.511520976                                 | 11.52469813                                      |
| 0.077021108                                                | 22.34391164                                 | 66.31682741                                      |
| 0.247580069                                                | 1.320136945                                 | 7.76504298                                       |
| 0.197248587                                                | 3.255897514                                 | 12.59348199                                      |
| 0.251236995                                                | 1.677708105                                 | 8.144329897                                      |
| 0.142630628                                                | 8.736379023                                 | 26.27097465                                      |
| 0.126599184                                                | 9.443386514                                 | 30.15773354                                      |
| 0.197877231                                                | 2.342855598                                 | 11.70930233                                      |
| 0.179718171                                                | 3.220486914                                 | 13.98205785                                      |
| 0.223542429                                                | 1.92929664                                  | 10.00623701                                      |
| 0.16261272                                                 | 3.649669982                                 | 15.46179402                                      |
| 0.226336902                                                | 2.007208763                                 | 9.051873199                                      |
| 0.102861896                                                | 21.74949464                                 | 53.54529717                                      |
| 0.18092281                                                 | 2.856972694                                 | 12.77529658                                      |
| 0.249597702                                                | 1.546278038                                 | 7.506515581                                      |
| 0.131730283                                                | 11.10499795                                 | 30.2895358                                       |
| 0.162934328                                                | 3.816957006                                 | 15.80088078                                      |
| 0.159659774                                                | 7.231118416                                 | 21.39561551                                      |
| 0.210887547                                                | 2.334033939                                 | 10.8622725                                       |
| 0.368713018                                                | 0.576923077                                 | 4.576923077                                      |
| 0.249110901                                                | 1.268870663                                 | 7.885542169                                      |
| 0.220125968                                                | 1.950494069                                 | 9.796039604                                      |
| 0.182370756                                                | 3.170570988                                 | 13.33958333                                      |
| 0.154284581                                                | 5.21121462                                  | 20.06380441                                      |
| 0.168179569                                                | 4.187543476                                 | 17.13892216                                      |
| 0.216111218                                                | 2.743892454                                 | 10.56148713                                      |
| 0.15396129                                                 | 5.136973944                                 | 19.4165536                                       |
| 0.248054137                                                | 1.412463431                                 | 7.426023085                                      |
| 0.239872649                                                | 1.658578632                                 | 8.567600487                                      |
| 0.236328852                                                | 1.487356573                                 | 8.116097561                                      |
| 0.18563752                                                 | 3.289682337                                 | 13.44941427                                      |
| 0.133238544                                                | 6.397779687                                 | 23.45601436                                      |
| 0.177179143                                                | 3.215656719                                 | 14.33614627                                      |
| 0.240622674                                                | 1.63179744                                  | 8.20754717                                       |
| 0.229672533                                                | 1.526843395                                 | 8.194029851                                      |
| 0.247541588                                                | 1.39614346                                  | 7.511066398                                      |
| 0.173497856                                                | 7.435007629                                 | 20.80957944                                      |
| 0.240356821                                                | 1.560153174                                 | 8.088270859                                      |
| 0.182090516                                                | 5.605175218                                 | 16.79377126                                      |
| 0.196417784                                                | 2.40791798                                  | 12.45177665                                      |
| 0.110884118                                                | 11.39466573                                 | 35.14441208                                      |
| 0.246716133                                                | 1.49794277                                  | 7.575654152                                      |
| 0.233353482                                                | 1.758633001                                 | 8.263109895                                      |
| 0.208045703                                                | 2.542693748                                 | 10.8066512                                       |
| 0.187622624                                                | 2.965849477                                 | 12.7027027                                       |
| 0.218303934                                                | 1.953973467                                 | 10.80476731                                      |
| 0.211448765                                                | 2.378194457                                 | 10.36101935                                      |
| 0.185682422                                                | 4.399474095                                 | 14.94121942                                      |
| 0.135491459                                                | 7.927787099                                 | 25.91197411                                      |
| 0.114855127                                                | 11.70420901                                 | 36.1724643                                       |
| 0.281615664                                                | 1.127949203                                 | 6.760368664                                      |
| 0.187299658                                                | 3.601572098                                 | 13.34256278                                      |
| 0.244144399                                                | 1.664381973                                 | 7.700507614                                      |
| 0.208565193                                                | 2.975207931                                 | 11.55239287                                      |
| 0.258933419                                                | 1.223632086                                 | 6.515695067                                      |
| 0.202722668                                                | 2.403728771                                 | 10.94430632                                      |
| 0.190281337                                                | 3.908543975                                 | 13.59210526                                      |
| 0.25468426                                                 | 1.456452444                                 | 7.91408326                                       |
| 0.153749796                                                | 5.519041775                                 | 19.82933437                                      |
| 0.132456924                                                | 9.277582164                                 | 28.22781418                                      |
| 0.121991494                                                | 10.03844628                                 | 31.43159041                                      |
| 0.237347606                                                | 1.525956758                                 | 7.749103943                                      |
| 0.222472908                                                | 2.256212886                                 | 10.21396598                                      |
| 0.284762161                                                | 1.131846278                                 | 6.550819672                                      |
| 0.216152221                                                | 2.462309943                                 | 10.36848073                                      |
| 0.193503328                                                | 2.386190824                                 | 12.04286718                                      |
| 0.28773778                                                 | 1.214285714                                 | 5.908730159                                      |
| 0.239042174                                                | 1.614419548                                 | 7.94108874                                       |
| 0.186468348                                                | 3.33073774                                  | 13.25143266                                      |
| 0.233198573                                                | 1.412128419                                 | 8.462068966                                      |
| 0.186039929                                                | 2.875482927                                 | 13.0849307                                       |
| 0.134610434                                                | 7.972005473                                 | 26.67494522                                      |
| 0.240475545                                                | 1.688556116                                 | 8.100257069                                      |
| 0.259775381                                                | 1.261423571                                 | 6.731958763                                      |
| 0.188330497                                                | 2.913732868                                 | 11.52459016                                      |
| 0.227573696                                                | 1.900589569                                 | 8.561904762                                      |
| 0.152662759                                                | 8.797276943                                 | 23.71144654                                      |
| 0.248621689                                                | 1.832251282                                 | 7.671388102                                      |
| 0.149752414                                                | 7.051975904                                 | 22.81800391                                      |
| 0.163335346                                                | 5.327209665                                 | 18.81711491                                      |
| 0.1424598                                                  | 7.537843126                                 | 24.09094041                                      |
| 0.315846209                                                | 0.818166195                                 | 4.833992095                                      |
| 0.193857124                                                | 2.64283241                                  | 12.20394737                                      |
| 0.281908917                                                | 1.130411792                                 | 6.349593496                                      |
| 0.193461477                                                | 2.225896506                                 | 12.87862797                                      |
| 0.169288552                                                | 4.910941898                                 | 15.34696406                                      |

| log.sigma.4.5.mm.3D_gldm_LargeDependenceLowGrayLevelEmphasis | log.sigma.4.5.mm.3D_gldm_SmallDependenceHighGrayLevelEmphasis | log.sigma.4.5.mm.3D_gldm_LargeDependenceHighGrayLevelEmphasis |
|--------------------------------------------------------------|---------------------------------------------------------------|---------------------------------------------------------------|
| 0.072135698                                                  | 130.6087286                                                   | 2084.630312                                                   |
| 0.291379656                                                  | 50.12811658                                                   | 4156.832451                                                   |
| 0.24165924                                                   | 58.30443664                                                   | 1110.052995                                                   |
| 0.041579537                                                  | 108.7232269                                                   | 4880.535104                                                   |
| 0.056762433                                                  | 144.1411652                                                   | 3245.607242                                                   |
| 0.24359279                                                   | 44.36808655                                                   | 1427.796267                                                   |
| 0.551970308                                                  | 24.83785125                                                   | 1209.543027                                                   |
| 0.072324025                                                  | 136.3308717                                                   | 2184.877246                                                   |
| 0.066506415                                                  | 127.824521                                                    | 3157.529582                                                   |
| 0.143497008                                                  | 68.6621213                                                    | 2885.705617                                                   |
| 0.099179772                                                  | 60.03984289                                                   | 1990.935913                                                   |
| 0.207346888                                                  | 63.94467574                                                   | 1906.608637                                                   |
| 0.280259137                                                  | 38.22649333                                                   | 2250.007715                                                   |
| 0.092891746                                                  | 78.14478936                                                   | 2600.22093                                                    |
| 0.128306422                                                  | 69.72466778                                                   | 2085.13831                                                    |
| 0.340417487                                                  | 35.48600559                                                   | 13984.09097                                                   |
| 0.28240936                                                   | 92.70360776                                                   | 1757.206304                                                   |
| 0.383385504                                                  | 69.03987052                                                   | 1734.81175                                                    |
| 0.058746681                                                  | 150.0435221                                                   | 3363.546392                                                   |
| 0.375576472                                                  | 31.70154821                                                   | 2984.36487                                                    |
| 0.215268819                                                  | 41.22065469                                                   | 5211.49464                                                    |
| 0.243984823                                                  | 54.57541559                                                   | 1719.634302                                                   |
| 0.123159553                                                  | 67.74547472                                                   | 2543.144269                                                   |
| 0.121308365                                                  | 79.65059067                                                   | 3232.700624                                                   |
| 0.679347155                                                  | 29.46014646                                                   | 1067.240033                                                   |
| 0.11762945                                                   | 99.11432866                                                   | 1681.976945                                                   |
| 0.318675057                                                  | 39.11059728                                                   | 10125.30525                                                   |
| 0.437961499                                                  | 48.90293188                                                   | 1239.167481                                                   |
| 0.059543392                                                  | 105.634157                                                    | 2298.822663                                                   |
| 0.213284229                                                  | 56.04316578                                                   | 6797.222659                                                   |
| 0.24379785                                                   | 48.06187671                                                   | 1769.708713                                                   |
| 0.212428079                                                  | 61.52550412                                                   | 3893.215683                                                   |
| 0.098466098                                                  | 74.63435664                                                   | 2695.311363                                                   |
| 0.086557822                                                  | 82.41840278                                                   | 726.8942308                                                   |
| 0.061438208                                                  | 101.4478606                                                   | 2586.629518                                                   |
| 0.082450045                                                  | 78.79157522                                                   | 2610.042574                                                   |
| 0.246153855                                                  | 61.09425806                                                   | 1786.919792                                                   |
| 0.246395798                                                  | 34.98297824                                                   | 3372.210197                                                   |
| 0.103120859                                                  | 62.4674002                                                    | 5450.807186                                                   |
| 0.160411913                                                  | 81.49355549                                                   | 2066.193518                                                   |
| 0.117626195                                                  | 65.06567705                                                   | 4424.664858                                                   |
| 0.159021822                                                  | 116.8689797                                                   | 2047.293809                                                   |
| 0.10095838                                                   | 78.21307404                                                   | 2068.373934                                                   |
| 0.087251785                                                  | 110.5919961                                                   | 2485.546341                                                   |
| 0.121709471                                                  | 64.48760803                                                   | 2698.903621                                                   |
| 0.639920993                                                  | 28.16908953                                                   | 1456.622083                                                   |
| 0.105140192                                                  | 63.30904656                                                   | 3239.92241                                                    |
| 0.3663908                                                    | 73.47181044                                                   | 1417.780446                                                   |
| 0.131229014                                                  | 90.73697761                                                   | 1473.074627                                                   |
| 0.158034301                                                  | 164.5310716                                                   | 3561.422535                                                   |
| 0.198176778                                                  | 51.19486952                                                   | 3457.051402                                                   |
| 0.133971553                                                  | 70.72874669                                                   | 1685.781137                                                   |
| 0.117560921                                                  | 77.28468029                                                   | 3574.98168                                                    |
| 0.193533152                                                  | 53.0302128                                                    | 2270.208122                                                   |
| 0.327941848                                                  | 39.76488036                                                   | 5250.956462                                                   |
| 0.071320767                                                  | 123.4401874                                                   | 2101.410694                                                   |
| 0.051506311                                                  | 136.0273132                                                   | 2471.891929                                                   |
| 0.034667398                                                  | 136.4993418                                                   | 5157                                                          |
| 0.289250393                                                  | 65.85966638                                                   | 1866.486486                                                   |
| 0.216818587                                                  | 43.41818371                                                   | 1638.716232                                                   |
| 0.207665031                                                  | 78.17533437                                                   | 1469.392638                                                   |
| 0.101548478                                                  | 75.87029944                                                   | 3831.580504                                                   |
| 0.305597331                                                  | 31.10605296                                                   | 3032.422977                                                   |
| 0.224957094                                                  | 39.50112887                                                   | 6829.182351                                                   |
| 0.130965561                                                  | 90.52107015                                                   | 1369.331797                                                   |
| 0.110855327                                                  | 72.20513248                                                   | 2541.773342                                                   |
| 0.12471518                                                   | 153.1089608                                                   | 2589.591371                                                   |
| 0.157333749                                                  | 83.01466842                                                   | 2337.789803                                                   |
| 0.148025017                                                  | 120.7679142                                                   | 1690.55157                                                    |
| 0.256402607                                                  | 59.20766055                                                   | 1454.241671                                                   |
| 0.191831986                                                  | 76.28253211                                                   | 2212.335197                                                   |
| 0.139014055                                                  | 92.53034531                                                   | 1614.981399                                                   |
| 0.249345088                                                  | 44.6777512                                                    | 2681.81308                                                    |
| 0.196827489                                                  | 51.59846114                                                   | 5550.1757                                                     |
| 0.223309201                                                  | 38.75223353                                                   | 5476.366885                                                   |
| 0.047076372                                                  | 151.2458754                                                   | 2743.756272                                                   |
| 0.142321506                                                  | 70.08032478                                                   | 1769.102954                                                   |
| 0.191100998                                                  | 92.44916895                                                   | 1270.042623                                                   |
| 0.133617135                                                  | 81.14488836                                                   | 1821.379252                                                   |
| 0.08953445                                                   | 77.26561501                                                   | 2763.1026                                                     |
| 0.096908239                                                  | 179.5866093                                                   | 1783.698413                                                   |
| 0.059910768                                                  | 106.8309369                                                   | 2378.980611                                                   |
| 0.05893547                                                   | 95.37679084                                                   | 4200.916905                                                   |
| 0.087201458                                                  | 55.42879693                                                   | 1403.151724                                                   |
| 0.215259559                                                  | 47.68085848                                                   | 1679.590091                                                   |
| 0.215847864                                                  | 41.1223517                                                    | 4280.123265                                                   |
| 0.330564745                                                  | 91.33470362                                                   | 1385.268638                                                   |
| 0.022636255                                                  | 230.9180305                                                   | 3887.75451                                                    |
| 0.088172155                                                  | 74.78794348                                                   | 2279.273224                                                   |
| 0.272378827                                                  | 60.05505026                                                   | 948.1238095                                                   |
| 0.104783916                                                  | 88.5580049                                                    | 6920.60327                                                    |
| 1.040642337                                                  | 93.36031409                                                   | 862.9660057                                                   |
| 0.52176786                                                   | 24.62141691                                                   | 2257.963796                                                   |
| 0.151952586                                                  | 49.56643355                                                   | 3487.538631                                                   |
| 0.378628593                                                  | 35.11504972                                                   | 3149.173958                                                   |
| 0.047716565                                                  | 210.9647167                                                   | 2386.671937                                                   |
| 0.060740038                                                  | 76.70144993                                                   | 3731.541941                                                   |
| 0.609181947                                                  | 53.98341915                                                   | 616.5853659                                                   |
| 0.288449378                                                  | 38.99008958                                                   | 2603.124011                                                   |
| 0.151513319                                                  | 115.7055689                                                   | 3307.873606                                                   |

| log.sigma.4.5.mm.3D_gldm_SmallDependenceLowGrayLevelEmphasis | log.sigma.4.5.mm.3D_gldm_LowGrayLevelEmphasis | log.sigma.4.5.mm.3D_gldm_DistanceZoneVariabilityNormalized |
|--------------------------------------------------------------|-----------------------------------------------|------------------------------------------------------------|
| 0.004141526                                                  | 0.009773173                                   | 0.906476754                                                |
| 0.003390325                                                  | 0.014657945                                   | 0.918515165                                                |
| 0.004879988                                                  | 0.020733424                                   | 0.887410807                                                |
| 0.001505955                                                  | 0.004198158                                   | 0.899844101                                                |
| 0.004387399                                                  | 0.008918674                                   | 0.895743163                                                |
| 0.00391364                                                   | 0.022351353                                   | 0.877452298                                                |
| 0.004092234                                                  | 0.034525344                                   | 0.824459877                                                |
| 0.004147751                                                  | 0.009854633                                   | 0.852028009                                                |
| 0.002120781                                                  | 0.006510623                                   | 0.917240526                                                |
| 0.001890555                                                  | 0.007957741                                   | 0.964337296                                                |
| 0.005205003                                                  | 0.012846698                                   | 0.878330831                                                |
| 0.0034821                                                    | 0.014815298                                   | 0.930842636                                                |
| 0.003916009                                                  | 0.019332322                                   | 0.910945227                                                |
| 0.00289185                                                   | 0.00928711                                    | 0.893470343                                                |
| 0.003819902                                                  | 0.011676377                                   | 0.905891579                                                |
| 0.00088699                                                   | 0.006292679                                   | 0.947565841                                                |
| 0.003820475                                                  | 0.021444248                                   | 0.821698361                                                |
| 0.003705712                                                  | 0.022238031                                   | 0.969316917                                                |
| 0.002620541                                                  | 0.008917552                                   | 0.850618018                                                |
| 0.002802644                                                  | 0.016072253                                   | 0.972608025                                                |
| 0.001484944                                                  | 0.007893822                                   | 0.945332031                                                |
| 0.003845073                                                  | 0.016507548                                   | 0.918364281                                                |
| 0.001670219                                                  | 0.008585524                                   | 0.964251954                                                |
| 0.002874246                                                  | 0.013610155                                   | 0.783460208                                                |
| 0.005908483                                                  | 0.038031029                                   | 0.936116296                                                |
| 0.003482635                                                  | 0.012702587                                   | 0.957466919                                                |
| 0.001341989                                                  | 0.007630297                                   | 0.925028922                                                |
| 0.003819517                                                  | 0.023889386                                   | 0.960969927                                                |
| 0.003502218                                                  | 0.008509283                                   | 0.952349641                                                |
| 0.00222258                                                   | 0.010997771                                   | 0.951397987                                                |
| 0.002437582                                                  | 0.013183068                                   | 0.973038745                                                |
| 0.001712177                                                  | 0.009857766                                   | 0.967549409                                                |
| 0.003011185                                                  | 0.011430065                                   | 0.91839666                                                 |
| 0.016097237                                                  | 0.025664836                                   | 0.895061728                                                |
| 0.004728426                                                  | 0.00987659                                    | 0.85491971                                                 |
| 0.003308932                                                  | 0.009890394                                   | 0.846822081                                                |
| 0.002957052                                                  | 0.014645382                                   | 0.962361592                                                |
| 0.002413578                                                  | 0.012483654                                   | 0.957010023                                                |
| 0.002615696                                                  | 0.010711735                                   | 0.8698                                                     |
| 0.004174928                                                  | 0.015367668                                   | 0.941658658                                                |
| 0.00197224                                                   | 0.007061541                                   | 0.915731318                                                |
| 0.003020837                                                  | 0.013499295                                   | 0.876123611                                                |
| 0.004096849                                                  | 0.012572904                                   | 0.916567709                                                |
| 0.00304968                                                   | 0.011217554                                   | 0.846194178                                                |
| 0.003619526                                                  | 0.011005865                                   | 0.905                                                      |
| 0.003371222                                                  | 0.021118127                                   | 0.995992                                                   |
| 0.001883532                                                  | 0.008069113                                   | 0.891361339                                                |
| 0.004864998                                                  | 0.028739666                                   | 0.932286857                                                |
| 0.006258683                                                  | 0.024486091                                   | 0.802469136                                                |
| 0.003359494                                                  | 0.014221622                                   | 0.754092736                                                |
| 0.002490403                                                  | 0.0110102                                     | 0.940649729                                                |
| 0.006159642                                                  | 0.015788435                                   | 0.919450983                                                |
| 0.002401098                                                  | 0.008625504                                   | 0.920392711                                                |
| 0.002998865                                                  | 0.017164221                                   | 0.951836661                                                |
| 0.001697418                                                  | 0.01095979                                    | 0.960310408                                                |
| 0.004304528                                                  | 0.011379521                                   | 0.901982386                                                |
| 0.002125486                                                  | 0.005947044                                   | 0.779838965                                                |
| 0.002189843                                                  | 0.004561553                                   | 0.751676454                                                |
| 0.0036464                                                    | 0.020009509                                   | 0.919261314                                                |
| 0.003674009                                                  | 0.017082664                                   | 0.969472988                                                |
| 0.004089182                                                  | 0.016004219                                   | 0.912355936                                                |
| 0.00249388                                                   | 0.008183674                                   | 0.929780852                                                |
| 0.003201585                                                  | 0.014338211                                   | 0.958165608                                                |
| 0.001442964                                                  | 0.007449233                                   | 0.980081697                                                |
| 0.005702771                                                  | 0.021416977                                   | 0.96001666                                                 |
| 0.004020152                                                  | 0.011088029                                   | 0.945398308                                                |
| 0.003950709                                                  | 0.014972807                                   | 0.76446281                                                 |
| 0.002890382                                                  | 0.012633121                                   | 0.951461136                                                |
| 0.00815639                                                   | 0.019533844                                   | 0.873882704                                                |
| 0.005082468                                                  | 0.021648541                                   | 0.941148217                                                |
| 0.002842676                                                  | 0.013222332                                   | 0.905687314                                                |
| 0.003722779                                                  | 0.014727378                                   | 0.910454484                                                |
| 0.002356497                                                  | 0.013295252                                   | 0.961767526                                                |
| 0.001068505                                                  | 0.007245209                                   | 0.961932543                                                |
| 0.002110511                                                  | 0.009184505                                   | 0.952012354                                                |
| 0.002796473                                                  | 0.007145784                                   | 0.832215239                                                |
| 0.003733767                                                  | 0.012040068                                   | 0.861688277                                                |
| 0.00683182                                                   | 0.023403667                                   | 0.889273356                                                |
| 0.003013963                                                  | 0.012072016                                   | 0.851127221                                                |
| 0.001381247                                                  | 0.006998605                                   | 0.93439058                                                 |
| 0.005665018                                                  | 0.012210613                                   | 0.841480954                                                |
| 0.004208982                                                  | 0.008956561                                   | 0.872520776                                                |
| 0.001657562                                                  | 0.005119109                                   | 0.926987006                                                |
| 0.0011618764                                                 | 0.018570358                                   | 0.808673469                                                |
| 0.003342811                                                  | 0.01579346                                    | 0.96346444                                                 |
| 0.001537556                                                  | 0.008530325                                   | 0.824782385                                                |
| 0.004253771                                                  | 0.022586549                                   | 0.941743545                                                |
| 0.001750283                                                  | 0.003771641                                   | 0.809539921                                                |
| 0.008586553                                                  | 0.013369698                                   | 0.919063678                                                |
| 0.016086792                                                  | 0.028533109                                   | 0.737283951                                                |
| 0.001589228                                                  | 0.005638605                                   | 0.921991176                                                |
| 0.006889625                                                  | 0.046052584                                   | 0.988095665                                                |
| 0.005018308                                                  | 0.027322628                                   | 0.922306545                                                |
| 0.002325418                                                  | 0.009336254                                   | 0.920678641                                                |
| 0.003230972                                                  | 0.018195448                                   | 0.95382613                                                 |
| 0.007249076                                                  | 0.012717627                                   | 0.683396152                                                |
| 0.002824289                                                  | 0.007171141                                   | 0.968093499                                                |
| 0.008679538                                                  | 0.055808037                                   | 0.842449465                                                |
| 0.003636392                                                  | 0.021979237                                   | 0.777585544                                                |
| 0.00332689                                                   | 0.011826867                                   | 0.88859072                                                 |

| log.sigma.4.5.mm.3D_gldzm_LowIntensityEmphasis | log.sigma.4.5.mm.3D_gldzm_LargeDistanceEmphasis | log.sigma.4.5.mm.3D_gldzm_HighIntensitySmallDistanceEmphasis |
|------------------------------------------------|-------------------------------------------------|--------------------------------------------------------------|
| 0.010796824                                    | 1.147540984                                     | 353.3360656                                                  |
| 0.016704965                                    | 1.127659574                                     | 231.6532882                                                  |
| 0.017953922                                    | 1.179640719                                     | 184.5179641                                                  |
| 0.005344633                                    | 1.15862069                                      | 384.9043103                                                  |
| 0.012493845                                    | 1.165517241                                     | 412.3551724                                                  |
| 0.018687434                                    | 1.196721311                                     | 187.5874317                                                  |
| 0.029850429                                    | 1.291666667                                     | 133.7916667                                                  |
| 0.010899241                                    | 1.24137931                                      | 368.2275862                                                  |
| 0.006857163                                    | 1.129750983                                     | 409.5448886                                                  |
| 0.007781941                                    | 1.054483541                                     | 280.238933                                                   |
| 0.017035824                                    | 1.195205479                                     | 213.0111301                                                  |
| 0.014615699                                    | 1.107594937                                     | 242.9915612                                                  |
| 0.020481206                                    | 1.140127389                                     | 187.0355626                                                  |
| 0.010410422                                    | 1.169354839                                     | 266.4905914                                                  |
| 0.01361315                                     | 1.148514851                                     | 244.6765677                                                  |
| 0.007910559                                    | 1.080829016                                     | 278.6183938                                                  |
| 0.013785287                                    | 1.296819788                                     | 271.934629                                                   |
| 0.013962014                                    | 1.046753247                                     | 257.1363636                                                  |
| 0.009512995                                    | 1.243902439                                     | 440.7601626                                                  |
| 0.014194961                                    | 1.041666667                                     | 180.6076389                                                  |
| 0.008965947                                    | 1.084375                                        | 250.8898438                                                  |
| 0.016004152                                    | 1.127906977                                     | 217.4578488                                                  |
| 0.007761427                                    | 1.054616385                                     | 283.5802991                                                  |
| 0.014231063                                    | 1.370588235                                     | 267.5411765                                                  |
| 0.030276992                                    | 1.099099099                                     | 121.6614114                                                  |
| 0.012396554                                    | 1.065217391                                     | 294.1865942                                                  |
| 0.010052415                                    | 1.117021277                                     | 266.3568262                                                  |
| 0.015716988                                    | 1.059734513                                     | 187.2577434                                                  |
| 0.009348873                                    | 1.073264781                                     | 291.5510925                                                  |
| 0.01107623                                     | 1.074766355                                     | 265.211838                                                   |
| 0.01081613                                     | 1.041002278                                     | 206.5842825                                                  |
| 0.007928758                                    | 1.049492386                                     | 276.1135787                                                  |
| 0.012175948                                    | 1.127853881                                     | 270.3649163                                                  |
| 0.034911282                                    | 1.166666667                                     | 193.9166667                                                  |
| 0.014337146                                    | 1.236220472                                     | 312.1673228                                                  |
| 0.011845435                                    | 1.250720461                                     | 264.5738473                                                  |
| 0.011868397                                    | 1.057562077                                     | 235.2756772                                                  |
| 0.01268492                                     | 1.065934066                                     | 187.1888736                                                  |
| 0.015081473                                    | 1.21                                            | 295.465                                                      |
| 0.014235668                                    | 1.090225564                                     | 253.6817043                                                  |
| 0.009112933                                    | 1.132231405                                     | 309.4876033                                                  |
| 0.010656946                                    | 1.199017199                                     | 314.9195332                                                  |
| 0.013865087                                    | 1.13085622                                      | 248.7600969                                                  |
| 0.011348783                                    | 1.251851852                                     | 332.2493827                                                  |
| 0.0140031                                      | 1.15                                            | 246.35                                                       |
| 0.016328118                                    | 1.006024096                                     | 149.4262048                                                  |
| 0.00853289                                     | 1.172925764                                     | 269.4069869                                                  |
| 0.014863111                                    | 1.105263158                                     | 222.7335526                                                  |
| 0.028086916                                    | 1.333333333                                     | 248.0185185                                                  |
| 0.013689598                                    | 1.430693069                                     | 437.7623762                                                  |
| 0.011464815                                    | 1.091836735                                     | 232.4348073                                                  |
| 0.017306849                                    | 1.126126126                                     | 213.5908408                                                  |
| 0.009481083                                    | 1.124584718                                     | 289.7084718                                                  |
| 0.017542398                                    | 1.074074074                                     | 226.7993827                                                  |
| 0.009797868                                    | 1.060765191                                     | 225.5697674                                                  |
| 0.012970519                                    | 1.15503876                                      | 331.3624031                                                  |
| 0.005987914                                    | 1.377825619                                     | 369.5831539                                                  |
| 0.006714191                                    | 1.435789474                                     | 430.8168421                                                  |
| 0.018287435                                    | 1.126436782                                     | 246.4051724                                                  |
| 0.015972815                                    | 1.046511628                                     | 185.7228682                                                  |
| 0.013751816                                    | 1.137795276                                     | 258.1141732                                                  |
| 0.00956211                                     | 1.109311741                                     | 288.962406                                                   |
| 0.017036514                                    | 1.064122137                                     | 167.398855                                                   |
| 0.008870762                                    | 1.030181087                                     | 261.2706237                                                  |
| 0.021524476                                    | 1.06122449                                      | 259.8163265                                                  |
| 0.014280445                                    | 1.084269663                                     | 248.3970037                                                  |
| 0.013206464                                    | 1.409090909                                     | 387.2769886                                                  |
| 0.010480685                                    | 1.074666667                                     | 285.8384444                                                  |
| 0.019094765                                    | 1.202898551                                     | 292.2983092                                                  |
| 0.020034088                                    | 1.091040462                                     | 205.7695087                                                  |
| 0.011253592                                    | 1.148854962                                     | 261.898855                                                   |
| 0.012789947                                    | 1.140939597                                     | 285.0307606                                                  |
| 0.011204155                                    | 1.058489033                                     | 219.4843623                                                  |
| 0.006066267                                    | 1.058231488                                     | 284.7846873                                                  |
| 0.012141868                                    | 1.073796791                                     | 219.0639037                                                  |
| 0.008006251                                    | 1.277310924                                     | 401.1811975                                                  |
| 0.013012268                                    | 1.224226804                                     | 235.751933                                                   |
| 0.020731536                                    | 1.176470588                                     | 249.3382353                                                  |
| 0.010523785                                    | 1.242990654                                     | 258.586838                                                   |
| 0.006385108                                    | 1.101873536                                     | 311.470726                                                   |
| 0.012676115                                    | 1.260377358                                     | 397.0707547                                                  |
| 0.011157886                                    | 1.205263158                                     | 296.8223684                                                  |
| 0.006094426                                    | 1.113839286                                     | 346.0276228                                                  |
| 0.032500559                                    | 1.321428571                                     | 179.9241071                                                  |
| 0.014585741                                    | 1.055842813                                     | 197.3503102                                                  |
| 0.009337902                                    | 1.291066282                                     | 224.3667147                                                  |
| 0.015156806                                    | 1.09009009                                      | 256.228979                                                   |
| 0.004435266                                    | 1.319775596                                     | 572.0052595                                                  |
| 0.023281045                                    | 1.126760563                                     | 219.2042254                                                  |
| 0.040618712                                    | 1.466666667                                     | 170.0166667                                                  |
| 0.006435914                                    | 1.121972318                                     | 358.450692                                                   |
| 0.021867382                                    | 1.017964072                                     | 232.0666168                                                  |
| 0.027741737                                    | 1.12145749                                      | 129.0546559                                                  |
| 0.010754031                                    | 1.124117053                                     | 233.0613017                                                  |
| 0.01760774                                     | 1.070938215                                     | 177.2616323                                                  |
| 0.01543858                                     | 1.591549296                                     | 412.8239437                                                  |
| 0.010823132                                    | 1.048648649                                     | 301.9033784                                                  |
| 0.036254455                                    | 1.25862069                                      | 138.737069                                                   |
| 0.02492044                                     | 1.382352941                                     | 180.3063725                                                  |
| 0.011743229                                    | 1.177631579                                     | 346.0024671                                                  |

| log.sigma.4.5.mm.3D_gldzm_LowIntensityLargeDistanceEmphasis | log.sigma.4.5.mm.3D_gldzm_HighIntensityEmphasis | log.sigma.4.5.mm.3D_gldzm_DistanceZoneVariability | log.sigma.4.5.mm.3D_gldzm_ZonePercentage |
|-------------------------------------------------------------|-------------------------------------------------|---------------------------------------------------|------------------------------------------|
| 0.011874706                                                 | 360.2852459                                     | 276.4754098                                       | 0.432011331                              |
| 0.0119805                                                   | 235.6847195                                     | 474.8723404                                       | 0.248916707                              |
| 0.021095814                                                 | 188.1736527                                     | 148.1976048                                       | 0.384792627                              |
| 0.005959856                                                 | 397.1896552                                     | 782.8643678                                       | 0.330170778                              |
| 0.01325131                                                  | 422.6068966                                     | 129.8827586                                       | 0.403899721                              |
| 0.022094104                                                 | 191.2021858                                     | 160.5737705                                       | 0.284603421                              |
| 0.090837119                                                 | 136.625                                         | 59.36111111                                       | 0.213649852                              |
| 0.01236612                                                  | 380.2965517                                     | 370.6321839                                       | 0.434131737                              |
| 0.00745986                                                  | 417.7771953                                     | 699.8545216                                       | 0.367003367                              |
| 0.008231946                                                 | 282.569807                                      | 849.5811578                                       | 0.284377017                              |
| 0.018492894                                                 | 220.4417808                                     | 256.4726027                                       | 0.353083434                              |
| 0.022597256                                                 | 246.7763713                                     | 441.2194093                                       | 0.319838057                              |
| 0.021987325                                                 | 192.8174098                                     | 429.0552017                                       | 0.227097396                              |
| 0.011633612                                                 | 274.4623656                                     | 332.3709677                                       | 0.33273703                               |
| 0.014661528                                                 | 251.9735974                                     | 274.4851485                                       | 0.332601537                              |
| 0.008609067                                                 | 282.2704663                                     | 914.4010363                                       | 0.138908882                              |
| 0.01605448                                                  | 285.3286219                                     | 232.540636                                        | 0.405444126                              |
| 0.014642057                                                 | 258.0792208                                     | 746.374026                                        | 0.330188679                              |
| 0.010773795                                                 | 457.8455285                                     | 209.2520325                                       | 0.422680412                              |
| 0.014796409                                                 | 181.6753472                                     | 560.2222222                                       | 0.205640843                              |
| 0.009711276                                                 | 255.178125                                      | 907.51875                                         | 0.183767228                              |
| 0.026811128                                                 | 222.1569767                                     | 473.875969                                        | 0.3                                      |
| 0.008886507                                                 | 285.4421326                                     | 741.5097529                                       | 0.281581838                              |
| 0.04117141                                                  | 284.6941176                                     | 133.1882353                                       | 0.353430353                              |
| 0.032292071                                                 | 123.6006006                                     | 311.7267267                                       | 0.276578073                              |
| 0.012988528                                                 | 296.3876812                                     | 264.2608696                                       | 0.397694524                              |
| 0.010680969                                                 | 273.608156                                      | 521.7163121                                       | 0.162723601                              |
| 0.016538027                                                 | 188.6283186                                     | 434.3584071                                       | 0.315422191                              |
| 0.00988415                                                  | 294.8624679                                     | 740.9280206                                       | 0.440793201                              |
| 0.012492757                                                 | 268.6744548                                     | 610.7975078                                       | 0.252557042                              |
| 0.012006393                                                 | 207.998861                                      | 854.3280182                                       | 0.27618748                               |
| 0.008417364                                                 | 278.4511421                                     | 1524.857868                                       | 0.265767285                              |
| 0.012849401                                                 | 278.1628615                                     | 603.3866058                                       | 0.323167732                              |
| 0.104321597                                                 | 195.1111111                                     | 48.33333333                                       | 0.519230769                              |
| 0.016329622                                                 | 321.2913386                                     | 108.5748031                                       | 0.38253012                               |
| 0.013300495                                                 | 278.0317003                                     | 587.6945245                                       | 0.343564356                              |
| 0.012276051                                                 | 238.0699774                                     | 852.6523702                                       | 0.307638889                              |
| 0.013314943                                                 | 189.4574176                                     | 696.7032967                                       | 0.217054264                              |
| 0.017348562                                                 | 303.145                                         | 173.96                                            | 0.239520958                              |
| 0.015415185                                                 | 255.8245614                                     | 375.2718045                                       | 0.38036225                               |
| 0.009981722                                                 | 317.7272727                                     | 332.4104683                                       | 0.246268657                              |
| 0.012203554                                                 | 325.1523342                                     | 356.5823096                                       | 0.427072403                              |
| 0.015155691                                                 | 252.7027464                                     | 567.355412                                        | 0.376979294                              |
| 0.015681171                                                 | 341.3753086                                     | 342.708642                                        | 0.395121951                              |
| 0.01533305                                                  | 252.6810345                                     | 524.9                                             | 0.308839191                              |
| 0.01640249                                                  | 149.5481928                                     | 496.0040161                                       | 0.223518851                              |
| 0.009676422                                                 | 278.4253275                                     | 1020.608734                                       | 0.268401313                              |
| 0.01635929                                                  | 225.0526316                                     | 212.5614035                                       | 0.391080617                              |
| 0.095975247                                                 | 251.0740741                                     | 43.33333333                                       | 0.402985075                              |
| 0.015622347                                                 | 465.3415842                                     | 152.3267327                                       | 0.406438632                              |
| 0.012780672                                                 | 235.0759637                                     | 829.6530612                                       | 0.257593458                              |
| 0.018291399                                                 | 218.2642643                                     | 306.1771772                                       | 0.402660218                              |
| 0.010655684                                                 | 295.6187708                                     | 1108.152824                                       | 0.315100759                              |
| 0.019083322                                                 | 228.9567901                                     | 154.1975309                                       | 0.274111675                              |
| 0.010426171                                                 | 227.6774194                                     | 1280.093773                                       | 0.204353825                              |
| 0.014135739                                                 | 338.620155                                      | 349.0671835                                       | 0.440273038                              |
| 0.010306152                                                 | 387.5888052                                     | 724.4703983                                       | 0.423620611                              |
| 0.009237376                                                 | 457.0652632                                     | 357.0463158                                       | 0.367362722                              |
| 0.019513828                                                 | 250.5632184                                     | 239.9272031                                       | 0.320638821                              |
| 0.016783713                                                 | 186.7751938                                     | 250.124031                                        | 0.292849035                              |
| 0.01533692                                                  | 263.1929134                                     | 695.2152231                                       | 0.359603587                              |
| 0.010100013                                                 | 296.1266628                                     | 1607.591093                                       | 0.315626141                              |
| 0.017863423                                                 | 169.2091603                                     | 627.5984733                                       | 0.21197411                               |
| 0.009027369                                                 | 262.7585513                                     | 487.1006036                                       | 0.181984621                              |
| 0.022308914                                                 | 261.0714286                                     | 94.08163265                                       | 0.451612903                              |
| 0.014702149                                                 | 253.6666667                                     | 504.8426966                                       | 0.343850612                              |
| 0.017230875                                                 | 402.2727273                                     | 134.5454545                                       | 0.446700508                              |
| 0.011106158                                                 | 288.9111111                                     | 1070.393778                                       | 0.351892399                              |
| 0.020768409                                                 | 299.6570048                                     | 180.8937198                                       | 0.464125561                              |
| 0.021225556                                                 | 208.0693642                                     | 651.2745665                                       | 0.344107409                              |
| 0.012706851                                                 | 267.2519084                                     | 949.1603053                                       | 0.344736842                              |
| 0.014031807                                                 | 290.6465324                                     | 406.9731544                                       | 0.395925598                              |
| 0.011794436                                                 | 221.4809098                                     | 1183.935825                                       | 0.238196594                              |
| 0.006418806                                                 | 287.8957584                                     | 1338.048167                                       | 0.207117332                              |
| 0.012507706                                                 | 223.9016043                                     | 1780.263102                                       | 0.203703704                              |
| 0.009279538                                                 | 419.5042017                                     | 396.1344538                                       | 0.426523297                              |
| 0.016962311                                                 | 241.4716495                                     | 334.3350515                                       | 0.347358997                              |
| 0.022667196                                                 | 255.8345588                                     | 241.8823529                                       | 0.445901639                              |
| 0.020178835                                                 | 266.7071651                                     | 546.423676                                        | 0.363945578                              |
| 0.007025161                                                 | 317.1967213                                     | 797.969555                                        | 0.300070274                              |
| 0.015013733                                                 | 409.8037736                                     | 222.9924528                                       | 0.525793651                              |
| 0.01807907                                                  | 307.0315789                                     | 497.3368421                                       | 0.425055928                              |
| 0.006531539                                                 | 355.1305804                                     | 830.5803571                                       | 0.320916905                              |
| 0.112396392                                                 | 181.1428571                                     | 45.28571429                                       | 0.386206897                              |
| 0.015201867                                                 | 198.7269907                                     | 931.6701138                                       | 0.285166618                              |
| 0.011095561                                                 | 245.1325648                                     | 858.598463                                        | 0.190102264                              |
| 0.015794623                                                 | 261.0870871                                     | 313.6006006                                       | 0.428020566                              |
| 0.005652352                                                 | 600.85554                                       | 577.2019635                                       | 0.459407216                              |
| 0.023821684                                                 | 226.6619718                                     | 65.25352113                                       | 0.387978142                              |
| 0.13551124                                                  | 174.6                                           | 33.17777778                                       | 0.428571429                              |
| 0.007010191                                                 | 366.8226644                                     | 1065.821799                                       | 0.29081761                               |
| 0.022140509                                                 | 232.4011976                                     | 330.0239521                                       | 0.473087819                              |
| 0.0289973                                                   | 132.6315789                                     | 227.8097166                                       | 0.241682975                              |
| 0.012710593                                                 | 237.6316852                                     | 912.3925328                                       | 0.242298289                              |
| 0.018514703                                                 | 179.3302822                                     | 1250.466056                                       | 0.225800896                              |
| 0.039555124                                                 | 451.6549296                                     | 97.04225352                                       | 0.561264822                              |
| 0.010987663                                                 | 306.0486486                                     | 358.1945946                                       | 0.304276316                              |
| 0.109533909                                                 | 140.0689655                                     | 48.86206897                                       | 0.471544715                              |
| 0.037881246                                                 | 188.6078431                                     | 79.31372549                                       | 0.269129288                              |
| 0.014137394                                                 | 353.0756579                                     | 270.1315789                                       | 0.376703841                              |



| log.sigma.4.5.mm.3D_gldzm_IntensityVariabilityNormalized | log.sigma.4.5.mm.3D_gldzm_LowIntensitySmallDistanceEmphasis | log.sigma.4.5.mm.3D_gldzm_IntensityVariability |
|----------------------------------------------------------|-------------------------------------------------------------|------------------------------------------------|
| 0.040644988                                              | 0.010527354                                                 | 12.39672131                                    |
| 0.050458492                                              | 0.016386081                                                 | 26.08704062                                    |
| 0.059198967                                              | 0.017168448                                                 | 9.886227545                                    |
| 0.045588585                                              | 0.005190827                                                 | 39.66206897                                    |
| 0.041426873                                              | 0.012304479                                                 | 6.006896552                                    |
| 0.060825943                                              | 0.017835767                                                 | 11.13114754                                    |
| 0.076003086                                              | 0.014603756                                                 | 5.472222222                                    |
| 0.038689391                                              | 0.010532522                                                 | 16.82988506                                    |
| 0.040285553                                              | 0.006706489                                                 | 30.7378768                                     |
| 0.052518743                                              | 0.00766944                                                  | 46.26901249                                    |
| 0.052308125                                              | 0.016671556                                                 | 15.2739726                                     |
| 0.048514305                                              | 0.01262031                                                  | 22.99578059                                    |
| 0.048814241                                              | 0.020104676                                                 | 22.99150743                                    |
| 0.05074286                                               | 0.010104625                                                 | 18.87634409                                    |
| 0.048110752                                              | 0.013351056                                                 | 14.57755776                                    |
| 0.052413756                                              | 0.007735932                                                 | 50.57927461                                    |
| 0.048733284                                              | 0.013217988                                                 | 13.79151943                                    |
| 0.046085343                                              | 0.013792003                                                 | 35.48571429                                    |
| 0.044880693                                              | 0.009197796                                                 | 11.04065041                                    |
| 0.059353299                                              | 0.014044598                                                 | 34.1875                                        |
| 0.063361545                                              | 0.008779615                                                 | 60.82708333                                    |
| 0.052753741                                              | 0.013302408                                                 | 27.22093023                                    |
| 0.055162583                                              | 0.007480157                                                 | 42.42002601                                    |
| 0.04982699                                               | 0.007495976                                                 | 8.470588235                                    |
| 0.069321574                                              | 0.029773222                                                 | 23.08408408                                    |
| 0.04484352                                               | 0.012248561                                                 | 12.37681159                                    |
| 0.052713646                                              | 0.009895277                                                 | 29.73049645                                    |
| 0.059881353                                              | 0.015511728                                                 | 27.06637168                                    |
| 0.046649176                                              | 0.009215054                                                 | 36.29305913                                    |
| 0.049305616                                              | 0.011509599                                                 | 31.65420561                                    |
| 0.06266053                                               | 0.010518564                                                 | 55.01594533                                    |
| 0.050833086                                              | 0.007806606                                                 | 80.11294416                                    |
| 0.043815693                                              | 0.012007585                                                 | 28.7869102                                     |
| 0.054183813                                              | 0.016658703                                                 | 2.925925926                                    |
| 0.051646103                                              | 0.013839027                                                 | 6.559055118                                    |
| 0.047388484                                              | 0.01148167                                                  | 32.88760807                                    |
| 0.049421908                                              | 0.011766483                                                 | 43.78781038                                    |
| 0.05809232                                               | 0.012527414                                                 | 42.29120879                                    |
| 0.0472                                                   | 0.014514701                                                 | 9.44                                           |
| 0.04602358                                               | 0.013940789                                                 | 18.36340852                                    |
| 0.051780009                                              | 0.008895735                                                 | 18.79614325                                    |
| 0.042855677                                              | 0.010270294                                                 | 17.44226044                                    |
| 0.048608809                                              | 0.013542436                                                 | 30.08885299                                    |
| 0.041670477                                              | 0.010265686                                                 | 16.87654321                                    |
| 0.04646849                                               | 0.013670612                                                 | 26.95172414                                    |
| 0.067660199                                              | 0.016309525                                                 | 33.69477912                                    |
| 0.048802273                                              | 0.008247007                                                 | 55.87860262                                    |
| 0.053978147                                              | 0.014489066                                                 | 12.30701754                                    |
| 0.055555556                                              | 0.011114833                                                 | 3                                              |
| 0.037545339                                              | 0.013206411                                                 | 7.584158416                                    |
| 0.052822641                                              | 0.011135851                                                 | 46.58956916                                    |
| 0.052187322                                              | 0.017060712                                                 | 17.37837838                                    |
| 0.045617598                                              | 0.009187432                                                 | 54.92358804                                    |
| 0.053726566                                              | 0.017157167                                                 | 8.703703704                                    |
| 0.054946032                                              | 0.009640793                                                 | 73.24306077                                    |
| 0.041310285                                              | 0.012679214                                                 | 15.9870801                                     |
| 0.045227284                                              | 0.004908355                                                 | 42.01614639                                    |
| 0.044609418                                              | 0.006083395                                                 | 21.18947368                                    |
| 0.051716798                                              | 0.017980837                                                 | 13.49808429                                    |
| 0.061354486                                              | 0.015770091                                                 | 15.82945736                                    |
| 0.046255537                                              | 0.01335554                                                  | 35.24671916                                    |
| 0.046624436                                              | 0.009427634                                                 | 80.61364951                                    |
| 0.05872152                                               | 0.016829787                                                 | 38.46259542                                    |
| 0.056787405                                              | 0.00883161                                                  | 28.22334004                                    |
| 0.052269888                                              | 0.021328366                                                 | 5.12244898                                     |
| 0.045224368                                              | 0.01417502                                                  | 24.14981273                                    |
| 0.040418388                                              | 0.012200361                                                 | 7.113636364                                    |
| 0.043742025                                              | 0.010324317                                                 | 49.20977778                                    |
| 0.046138766                                              | 0.018676354                                                 | 9.550724638                                    |
| 0.049584016                                              | 0.019736221                                                 | 34.31213873                                    |
| 0.048177918                                              | 0.010890278                                                 | 50.49045802                                    |
| 0.045028002                                              | 0.012479482                                                 | 20.12751678                                    |
| 0.052904225                                              | 0.011056585                                                 | 65.12510154                                    |
| 0.062175917                                              | 0.005978132                                                 | 86.48670022                                    |
| 0.049367726                                              | 0.012050409                                                 | 92.31764706                                    |
| 0.041381258                                              | 0.007687929                                                 | 19.69747899                                    |
| 0.050643001                                              | 0.012024758                                                 | 19.64948454                                    |
| 0.044685337                                              | 0.020247621                                                 | 12.15441176                                    |
| 0.049465747                                              | 0.008110022                                                 | 31.75700935                                    |
| 0.05639805                                               | 0.006225094                                                 | 48.16393443                                    |
| 0.038234247                                              | 0.012091711                                                 | 10.13207547                                    |
| 0.048261003                                              | 0.00942759                                                  | 27.50877193                                    |
| 0.045734016                                              | 0.005985148                                                 | 40.97767857                                    |
| 0.071428571                                              | 0.0125266                                                   | 4                                              |
| 0.055724108                                              | 0.01443171                                                  | 53.885212                                      |
| 0.053736293                                              | 0.008898487                                                 | 55.93948127                                    |
| 0.044720396                                              | 0.014997352                                                 | 14.89189189                                    |
| 0.041172849                                              | 0.004130995                                                 | 29.35624123                                    |
| 0.059313628                                              | 0.023145885                                                 | 4.211267606                                    |
| 0.065679012                                              | 0.01689558                                                  | 2.955555556                                    |
| 0.04400091                                               | 0.006292345                                                 | 50.8650519                                     |
| 0.046147227                                              | 0.0217991                                                   | 15.41317365                                    |
| 0.062630104                                              | 0.027427847                                                 | 15.46963563                                    |
| 0.051173987                                              | 0.010264891                                                 | 50.71342079                                    |
| 0.05650539                                               | 0.017380999                                                 | 74.07856598                                    |
| 0.037492561                                              | 0.009409444                                                 | 5.323943662                                    |
| 0.044134405                                              | 0.010782                                                    | 16.32972973                                    |
| 0.067776457                                              | 0.017934591                                                 | 3.931034483                                    |
| 0.064013841                                              | 0.021680239                                                 | 6.529411765                                    |
| 0.042222126                                              | 0.011144688                                                 | 12.83552632                                    |

| log.sigma.4.5.mm.3D_gldzm_HighIntensityLargeDistanceEmphasis | log.sigma.4.5.mm.3D_gldzm_SmallDistanceEmphasis | log.sigma.4.5.mm.3D_gldzm_SumVariance | log.sigma.4.5.mm.3D_gldzm_Homogeneity1 |
|--------------------------------------------------------------|-------------------------------------------------|---------------------------------------|----------------------------------------|
| 388.0819672                                                  | 0.963114754                                     | 801.7789957                           | 0.299479316                            |
| 251.8104449                                                  | 0.968085106                                     | 454.561377                            | 0.41052328                             |
| 202.7964072                                                  | 0.95508982                                      | 341.3238935                           | 0.349763013                            |
| 446.3310345                                                  | 0.960344828                                     | 1166.915161                           | 0.332867221                            |
| 463.6137931                                                  | 0.95862069                                      | 1086.440557                           | 0.303460977                            |
| 205.6612022                                                  | 0.950819672                                     | 362.9657105                           | 0.337642369                            |
| 147.9583333                                                  | 0.927083333                                     | 195.8120229                           | 0.416500594                            |
| 428.5724138                                                  | 0.939655172                                     | 895.0814208                           | 0.275799132                            |
| 450.706422                                                   | 0.967562254                                     | 1018.418835                           | 0.314733116                            |
| 291.8933031                                                  | 0.986379115                                     | 590.4846758                           | 0.380276389                            |
| 250.1643836                                                  | 0.95119863                                      | 548.0710561                           | 0.316546518                            |
| 261.9156118                                                  | 0.973101266                                     | 519.7727137                           | 0.343941624                            |
| 215.9447983                                                  | 0.964968153                                     | 404.1829277                           | 0.37822891                             |
| 306.3494624                                                  | 0.95766129                                      | 703.0145121                           | 0.334498698                            |
| 281.1617162                                                  | 0.962871287                                     | 571.1325241                           | 0.339430025                            |
| 296.8787565                                                  | 0.979792746                                     | 664.6291225                           | 0.548647457                            |
| 338.9045936                                                  | 0.925795053                                     | 642.7161961                           | 0.300296201                            |
| 261.8506494                                                  | 0.988311688                                     | 504.9296419                           | 0.335646319                            |
| 526.1869919                                                  | 0.93902439                                      | 1186.161278                           | 0.285585888                            |
| 185.9461806                                                  | 0.989583333                                     | 312.7794519                           | 0.430434319                            |
| 272.33125                                                    | 0.97890625                                      | 517.2725818                           | 0.448615837                            |
| 240.9534884                                                  | 0.968023256                                     | 462.3255892                           | 0.346193337                            |
| 292.8894668                                                  | 0.986345904                                     | 600.8679193                           | 0.373125105                            |
| 353.3058824                                                  | 0.907352941                                     | 828.9435903                           | 0.328336577                            |
| 131.3573574                                                  | 0.975225225                                     | 188.279544                            | 0.397175226                            |
| 305.192029                                                   | 0.983695652                                     | 604.2761133                           | 0.305483487                            |
| 302.6134752                                                  | 0.970744681                                     | 581.5165082                           | 0.485826436                            |
| 194.1106195                                                  | 0.985066372                                     | 310.2855975                           | 0.37381221                             |
| 308.1079692                                                  | 0.981683805                                     | 820.453761                            | 0.301225725                            |
| 282.5249221                                                  | 0.981308411                                     | 566.8184655                           | 0.419651469                            |
| 213.6571754                                                  | 0.989749431                                     | 366.6616105                           | 0.390598433                            |
| 287.8013959                                                  | 0.987626904                                     | 611.991228                            | 0.390612967                            |
| 309.3546423                                                  | 0.96803653                                      | 705.2918935                           | 0.332670072                            |
| 199.8888889                                                  | 0.958333333                                     | 418.9300034                           | 0.287981752                            |
| 357.7874016                                                  | 0.940944882                                     | 834.6793852                           | 0.30721704                             |
| 331.8631124                                                  | 0.937319885                                     | 721.3944236                           | 0.31917965                             |
| 249.2471783                                                  | 0.985609481                                     | 449.1347346                           | 0.353567786                            |
| 198.5315934                                                  | 0.983516484                                     | 435.2361788                           | 0.409495877                            |
| 333.865                                                      | 0.9475                                          | 836.0878686                           | 0.373287695                            |
| 264.39599                                                    | 0.977443609                                     | 561.7060009                           | 0.326306584                            |
| 350.6859504                                                  | 0.966942149                                     | 714.8349388                           | 0.387873333                            |
| 366.0835381                                                  | 0.9502457                                       | 783.010934                            | 0.290785858                            |
| 268.4733441                                                  | 0.967285945                                     | 617.9452715                           | 0.310197848                            |
| 377.8790123                                                  | 0.937037037                                     | 844.8190005                           | 0.296953781                            |
| 278.0051724                                                  | 0.9625                                          | 577.3806941                           | 0.352442252                            |
| 150.0361446                                                  | 0.998493976                                     | 206.8429392                           | 0.442861522                            |
| 314.49869                                                    | 0.956768559                                     | 667.2862736                           | 0.362756191                            |
| 234.3289474                                                  | 0.973684211                                     | 464.8637972                           | 0.309940663                            |
| 263.2962963                                                  | 0.916666667                                     | 491.5629904                           | 0.307158993                            |
| 575.6584158                                                  | 0.892326733                                     | 1275.53886                            | 0.284026492                            |
| 245.6405896                                                  | 0.977040816                                     | 491.1711595                           | 0.389405191                            |
| 236.957958                                                   | 0.968468468                                     | 513.4405731                           | 0.301850839                            |
| 319.2599668                                                  | 0.968853821                                     | 665.8963368                           | 0.349741413                            |
| 237.5864198                                                  | 0.981481481                                     | 500.6069267                           | 0.363144512                            |
| 236.108027                                                   | 0.984808702                                     | 447.7952456                           | 0.464959092                            |
| 367.6511628                                                  | 0.96124031                                      | 808.0860963                           | 0.286477626                            |
| 459.6114101                                                  | 0.905543595                                     | 911.8912783                           | 0.289741031                            |
| 562.0589474                                                  | 0.891052632                                     | 1285.262858                           | 0.31470005                             |
| 267.1954023                                                  | 0.968390805                                     | 466.435975                            | 0.355726898                            |
| 190.9844961                                                  | 0.988372093                                     | 401.1137456                           | 0.356548461                            |
| 283.507874                                                   | 0.965551181                                     | 500.6838585                           | 0.320842051                            |
| 324.78369                                                    | 0.972672065                                     | 772.6644547                           | 0.35036705                             |
| 176.4503817                                                  | 0.983969466                                     | 331.960283                            | 0.440234536                            |
| 268.7102616                                                  | 0.992454728                                     | 537.7498364                           | 0.465609236                            |
| 266.0918367                                                  | 0.984693878                                     | 557.5630018                           | 0.293878802                            |
| 274.7453184                                                  | 0.978932584                                     | 591.7756475                           | 0.352844026                            |
| 462.2556818                                                  | 0.897727273                                     | 906.4944601                           | 0.288042214                            |
| 301.2017778                                                  | 0.981333333                                     | 634.4666498                           | 0.327634544                            |
| 329.0917874                                                  | 0.949275362                                     | 667.5015348                           | 0.27861677                             |
| 217.2687861                                                  | 0.977239884                                     | 417.5102799                           | 0.342290655                            |
| 288.6641221                                                  | 0.96278626                                      | 575.212573                            | 0.336394234                            |
| 313.1096197                                                  | 0.964765101                                     | 626.9183727                           | 0.297230282                            |
| 229.4670999                                                  | 0.985377742                                     | 401.7857303                           | 0.398985717                            |
| 300.3400431                                                  | 0.985442128                                     | 599.5342481                           | 0.429955349                            |
| 243.2524064                                                  | 0.981550802                                     | 532.1551544                           | 0.444470948                            |
| 492.7962185                                                  | 0.930672269                                     | 1001.882002                           | 0.279502957                            |
| 264.3505155                                                  | 0.943943299                                     | 522.7890195                           | 0.326962528                            |
| 281.8198529                                                  | 0.955882353                                     | 562.2357795                           | 0.282709445                            |
| 299.1884735                                                  | 0.939252336                                     | 579.0045756                           | 0.315470844                            |
| 340.1007026                                                  | 0.974531616                                     | 744.0383358                           | 0.353549464                            |
| 460.7358491                                                  | 0.93490566                                      | 917.9169816                           | 0.252826493                            |
| 347.8684211                                                  | 0.948684211                                     | 793.1240411                           | 0.30045988                             |
| 391.5424107                                                  | 0.971540179                                     | 969.1934738                           | 0.350163704                            |
| 186.0178571                                                  | 0.919642857                                     | 385.5002866                           | 0.338743296                            |
| 204.2337125                                                  | 0.986039297                                     | 388.3243812                           | 0.367452601                            |
| 328.1959654                                                  | 0.927233429                                     | 528.9479775                           | 0.424842098                            |
| 280.5195195                                                  | 0.977477477                                     | 537.1781154                           | 0.296610413                            |
| 716.256662                                                   | 0.920056101                                     | 1626.602915                           | 0.268760286                            |
| 256.4929577                                                  | 0.968309859                                     | 565.9073512                           | 0.36865812                             |
| 192.9333333                                                  | 0.883333333                                     | 318.9684596                           | 0.325925051                            |
| 400.3105536                                                  | 0.96950692                                      | 903.4694416                           | 0.378859424                            |
| 233.739521                                                   | 0.995508982                                     | 405.2172357                           | 0.290625183                            |
| 146.9392713                                                  | 0.969635628                                     | 244.4645511                           | 0.41750005                             |
| 255.913219                                                   | 0.968970737                                     | 518.3548972                           | 0.389673643                            |
| 187.6048818                                                  | 0.982265446                                     | 338.8022962                           | 0.416613673                            |
| 606.9788732                                                  | 0.852112676                                     | 1259.399054                           | 0.243972132                            |
| 322.6297297                                                  | 0.987837838                                     | 879.4330307                           | 0.346483344                            |
| 145.3965517                                                  | 0.935344828                                     | 250.910974                            | 0.297535989                            |
| 221.8137255                                                  | 0.904411765                                     | 484.8907394                           | 0.375365772                            |
| 381.3684211                                                  | 0.955592105                                     | 705.3391731                           | 0.347085486                            |

| log.sigma.4.5.mm.3D_glcml_Homogeneity2 | log.sigma.4.5.mm.3D_glcml_ClusterShade | log.sigma.4.5.mm.3D_glcml_MaximumProbability | log.sigma.4.5.mm.3D_glcml_Ldmn | log.sigma.4.5.mm.3D_glcml_SumVariance2 |
|----------------------------------------|----------------------------------------|----------------------------------------------|--------------------------------|----------------------------------------|
| 0.205054163                            | 215.5979133                            | 0.013212751                                  | 0.976893004                    | 127.4214044                            |
| 0.335144499                            | 229.4030345                            | 0.030951895                                  | 0.982821499                    | 70.46358786                            |
| 0.25810129                             | 92.20884028                            | 0.019980056                                  | 0.970264613                    | 62.03043522                            |
| 0.24267811                             | -17.53412446                           | 0.012705835                                  | 0.983203787                    | 89.05104152                            |
| 0.208169455                            | -248.4705931                           | 0.013935931                                  | 0.974163504                    | 157.4812887                            |
| 0.243507509                            | -41.59773614                           | 0.015287037                                  | 0.968052834                    | 65.97719157                            |
| 0.338233364                            | 170.290463                             | 0.033041272                                  | 0.973041858                    | 48.84200027                            |
| 0.180993009                            | 183.4496281                            | 0.009643605                                  | 0.973236842                    | 146.6447633                            |
| 0.222833347                            | 194.9052659                            | 0.010228861                                  | 0.980911946                    | 122.8083224                            |
| 0.296117577                            | 205.9195758                            | 0.015292971                                  | 0.984208123                    | 70.63230222                            |
| 0.223173739                            | -110.3438517                           | 0.012070056                                  | 0.970513373                    | 79.43505257                            |
| 0.253473988                            | 286.6178666                            | 0.011852621                                  | 0.980191134                    | 96.9338322                             |
| 0.291423616                            | 404.2594194                            | 0.013364035                                  | 0.979188029                    | 92.50253797                            |
| 0.240652575                            | -195.4775674                           | 0.013106088                                  | 0.976905862                    | 89.31240468                            |
| 0.247697516                            | 191.1429769                            | 0.013697331                                  | 0.978774567                    | 86.02348472                            |
| 0.498495466                            | 57.73689702                            | 0.122636509                                  | 0.991690836                    | 43.27865975                            |
| 0.204498768                            | -203.0170148                           | 0.010871887                                  | 0.972347872                    | 108.8755936                            |
| 0.247495773                            | 509.2828705                            | 0.011632338                                  | 0.97598105                     | 111.1249862                            |
| 0.192211307                            | -706.0326467                           | 0.012264589                                  | 0.971583779                    | 137.9158459                            |
| 0.354984326                            | 154.0444905                            | 0.041919445                                  | 0.982506283                    | 51.09333444                            |
| 0.376287248                            | 72.61464764                            | 0.030742069                                  | 0.989697456                    | 41.92310525                            |
| 0.254503434                            | 367.6032675                            | 0.011518159                                  | 0.982474914                    | 91.20501613                            |
| 0.287181246                            | 211.316357                             | 0.017430516                                  | 0.98468201                     | 71.7425317                             |
| 0.234902339                            | -426.0946888                           | 0.016272674                                  | 0.974160677                    | 108.449919                             |
| 0.312916774                            | 68.50773967                            | 0.020484629                                  | 0.975376719                    | 42.25957522                            |
| 0.2121613842                           | 248.4865467                            | 0.01282311                                   | 0.972968278                    | 96.28956675                            |
| 0.420433928                            | 146.4347819                            | 0.09239369                                   | 0.990131197                    | 46.98545121                            |
| 0.288531205                            | 227.1362869                            | 0.016516624                                  | 0.979839644                    | 70.85597386                            |
| 0.2072869                              | -154.030964                            | 0.010945969                                  | 0.972421186                    | 108.4024472                            |
| 0.345966603                            | 37.63801496                            | 0.029639426                                  | 0.98443736                     | 71.91961746                            |
| 0.307133934                            | 250.59154                              | 0.020903172                                  | 0.982284842                    | 56.41657757                            |
| 0.309411267                            | 215.2934056                            | 0.02790558                                   | 0.986009087                    | 80.56301711                            |
| 0.241811694                            | 51.8499059                             | 0.010056926                                  | 0.979499665                    | 101.8311264                            |
| 0.191591485                            | 64.75525137                            | 0.022086767                                  | 0.95378356                     | 88.5533247                             |
| 0.212552663                            | -414.1866908                           | 0.016878842                                  | 0.968758065                    | 99.62646277                            |
| 0.22638405                             | -35.52121296                           | 0.011823651                                  | 0.976771776                    | 98.77567469                            |
| 0.266590195                            | 442.8268068                            | 0.013033225                                  | 0.982736423                    | 91.77452561                            |
| 0.328671124                            | 15.01635766                            | 0.021139595                                  | 0.982522985                    | 65.1246679                             |
| 0.288486852                            | -399.8437691                           | 0.02434874                                   | 0.982799558                    | 81.64715576                            |
| 0.234413983                            | -1.635897447                           | 0.015312832                                  | 0.975335072                    | 94.27603137                            |
| 0.306203684                            | 64.68332166                            | 0.021297257                                  | 0.988199288                    | 67.46484901                            |
| 0.196327254                            | 72.43227087                            | 0.01069797                                   | 0.973363075                    | 133.2952779                            |
| 0.216038966                            | -99.61635479                           | 0.009795798                                  | 0.972130227                    | 94.22308586                            |
| 0.202949036                            | 36.47129896                            | 0.010901007                                  | 0.975127691                    | 135.3313321                            |
| 0.263117188                            | 241.9583573                            | 0.015181423                                  | 0.978657917                    | 84.76663616                            |
| 0.370408477                            | 178.0613201                            | 0.029301614                                  | 0.983689842                    | 40.28180709                            |
| 0.273880933                            | 55.38902693                            | 0.012330532                                  | 0.983357052                    | 77.85145111                            |
| 0.216539576                            | -30.4480199                            | 0.011442921                                  | 0.968272325                    | 97.08992908                            |
| 0.210277242                            | -69.40637064                           | 0.023857897                                  | 0.958459856                    | 75.10498637                            |
| 0.192019925                            | -540.9246748                           | 0.01649781                                   | 0.977128884                    | 153.3861586                            |
| 0.306244181                            | 196.9138846                            | 0.029706205                                  | 0.9842391                      | 71.86206481                            |
| 0.208491487                            | -67.41679272                           | 0.012566687                                  | 0.957156475                    | 95.96145297                            |
| 0.262636824                            | 299.7853277                            | 0.019096911                                  | 0.983777612                    | 84.03381701                            |
| 0.2730872                              | -117.9569541                           | 0.019019938                                  | 0.977989624                    | 68.07877246                            |
| 0.400101335                            | 236.8972752                            | 0.067097014                                  | 0.984023266                    | 61.5546578                             |
| 0.191335713                            | -80.6675414                            | 0.010920804                                  | 0.973764042                    | 116.4249807                            |
| 0.195815314                            | 52.59051951                            | 0.008005021                                  | 0.9733737                      | 104.9879979                            |
| 0.223076671                            | -318.3182762                           | 0.014081971                                  | 0.982759942                    | 107.2376406                            |
| 0.26562831                             | 251.4753342                            | 0.014820037                                  | 0.978597593                    | 89.9512029                             |
| 0.263355563                            | -70.39919289                           | 0.016294755                                  | 0.974859674                    | 63.52751435                            |
| 0.229884715                            | 420.5026491                            | 0.012234268                                  | 0.976132573                    | 106.0198758                            |
| 0.263372311                            | 359.5658983                            | 0.014013462                                  | 0.984923034                    | 104.6392236                            |
| 0.366881567                            | 169.1932465                            | 0.037165691                                  | 0.98612865                     | 45.51600971                            |
| 0.400359662                            | 179.0587237                            | 0.04391782                                   | 0.985490096                    | 44.88171345                            |
| 0.196781698                            | 75.0814856                             | 0.018568837                                  | 0.964663054                    | 99.27975484                            |
| 0.266556143                            | 365.7210709                            | 0.015891248                                  | 0.98073945                     | 87.29637243                            |
| 0.194682709                            | -481.8363533                           | 0.019263565                                  | 0.971342949                    | 127.2147678                            |
| 0.239796293                            | 271.4844965                            | 0.012393445                                  | 0.975236614                    | 118.6190383                            |
| 0.1819243                              | -297.9399816                           | 0.01352535                                   | 0.965158551                    | 119.6119238                            |
| 0.253077019                            | 338.2088436                            | 0.012009211                                  | 0.975002865                    | 89.02078266                            |
| 0.24842506                             | 255.3386165                            | 0.011626217                                  | 0.978427341                    | 98.43074113                            |
| 0.203004551                            | 179.8865508                            | 0.008618312                                  | 0.971978716                    | 118.4285538                            |
| 0.320078429                            | 267.1037974                            | 0.022610338                                  | 0.983078753                    | 65.82821553                            |
| 0.355389312                            | 139.0235015                            | 0.024497984                                  | 0.987294691                    | 53.79212397                            |
| 0.373920174                            | 349.7489418                            | 0.038617622                                  | 0.987579087                    | 63.18485064                            |
| 0.184924679                            | 78.50260125                            | 0.010667651                                  | 0.977656311                    | 123.8844701                            |
| 0.234675437                            | 94.22026518                            | 0.011086882                                  | 0.979217123                    | 84.28722809                            |
| 0.18754772                             | 287.427867                             | 0.009439495                                  | 0.964975838                    | 129.0604965                            |
| 0.224182943                            | 204.0689691                            | 0.010975759                                  | 0.972650429                    | 96.98524778                            |
| 0.263132274                            | 67.14285936                            | 0.012756347                                  | 0.983101542                    | 70.55559819                            |
| 0.159308071                            | -110.777066                            | 0.011674525                                  | 0.966101279                    | 153.3890309                            |
| 0.205314687                            | -118.2980487                           | 0.010305924                                  | 0.977776125                    | 102.7694984                            |
| 0.263844494                            | 283.5525888                            | 0.020405202                                  | 0.983577132                    | 93.01691373                            |
| 0.24379676                             | -59.42978083                           | 0.030872813                                  | 0.963223517                    | 49.13366617                            |
| 0.28037476                             | 234.1750499                            | 0.013872672                                  | 0.979845944                    | 67.95153169                            |
| 0.348719807                            | 251.0857596                            | 0.026325818                                  | 0.985396086                    | 56.62602454                            |
| 0.202408945                            | 410.4365923                            | 0.010162148                                  | 0.973091253                    | 127.1525994                            |
| 0.174924469                            | -465.0510342                           | 0.008091576                                  | 0.973623569                    | 152.4230108                            |
| 0.280143579                            | 40.0589183                             | 0.026069951                                  | 0.972974683                    | 56.91383673                            |
| 0.232037898                            | 266.4591413                            | 0.035339758                                  | 0.961417674                    | 70.52576628                            |
| 0.298789704                            | 173.8759932                            | 0.036802986                                  | 0.984443978                    | 82.65774906                            |
| 0.196142127                            | 449.180199                             | 0.01059317                                   | 0.970263208                    | 120.1137403                            |
| 0.338806266                            | 127.102823                             | 0.035836631                                  | 0.976104217                    | 51.83944258                            |
| 0.307132588                            | 178.9959819                            | 0.016739992                                  | 0.983997101                    | 63.88279614                            |
| 0.339036068                            | 106.4291178                            | 0.028229602                                  | 0.982069055                    | 60.65489593                            |
| 0.149890929                            | -842.0140302                           | 0.015300979                                  | 0.965702554                    | 197.9790821                            |
| 0.257166997                            | -18.99352586                           | 0.014612027                                  | 0.978980517                    | 88.11149168                            |
| 0.202065846                            | 61.7682312                             | 0.022432765                                  | 0.942937137                    | 63.15533107                            |
| 0.286744146                            | -221.5122203                           | 0.02404201                                   | 0.977912069                    | 74.54498313                            |
| 0.260885353                            | 234.7437042                            | 0.017107872                                  | 0.982020477                    | 111.6145311                            |

| log.sigma.4.5.mm.3D_glc_m_Contrast | log.sigma.4.5.mm.3D_glc_m_DifferenceEntropy | log.sigma.4.5.mm.3D_glc_m_InverseVariance | log.sigma.4.5.mm.3D_glc_m_Entropy | log.sigma.4.5.mm.3D_glc_m_Dissimilarity |
|------------------------------------|---------------------------------------------|-------------------------------------------|-----------------------------------|-----------------------------------------|
| 28.48920886                        | 3.385924082                                 | 0.213232273                               | 8.287744141                       | 4.264747356                             |
| 16.51712593                        | 3.08754306                                  | 0.309517918                               | 7.764130991                       | 2.953920928                             |
| 17.14049278                        | 3.055812077                                 | 0.263592046                               | 7.417891118                       | 3.277659433                             |
| 22.88338147                        | 3.30710462                                  | 0.245589204                               | 8.325009248                       | 3.745925843                             |
| 28.64078881                        | 3.405970719                                 | 0.20956255                                | 7.963444975                       | 4.221621744                             |
| 18.45627747                        | 3.143285151                                 | 0.242789995                               | 7.72864697                        | 3.444618549                             |
| 10.76649717                        | 2.7000743                                   | 0.349817409                               | 6.870737609                       | 2.472204501                             |
| 37.35502576                        | 3.629702302                                 | 0.184612732                               | 8.687540182                       | 4.894758215                             |
| 27.76658434                        | 3.461348773                                 | 0.230512424                               | 8.636658771                       | 4.100047993                             |
| 16.04717369                        | 3.099449341                                 | 0.295095951                               | 7.892450106                       | 3.039524978                             |
| 23.160806                          | 3.261095926                                 | 0.228569176                               | 7.958067215                       | 3.883457795                             |
| 20.30445693                        | 3.220354036                                 | 0.25612166                                | 8.170618228                       | 3.503367869                             |
| 15.17571969                        | 3.039782553                                 | 0.28947968                                | 7.961861226                       | 2.978449416                             |
| 19.32756477                        | 3.187537104                                 | 0.246549519                               | 8.078653062                       | 3.503079829                             |
| 20.46782158                        | 3.232909796                                 | 0.249877399                               | 8.005775547                       | 3.537938246                             |
| 8.984806357                        | 2.611561389                                 | 0.359985402                               | 6.696048883                       | 1.880548974                             |
| 26.89402303                        | 3.325714082                                 | 0.213878141                               | 8.187499756                       | 4.159521718                             |
| 24.95996048                        | 3.355791593                                 | 0.247448428                               | 8.40419697                        | 3.841235903                             |
| 35.49650797                        | 3.552237871                                 | 0.192753106                               | 8.292140643                       | 4.751391855                             |
| 11.66728209                        | 2.894081611                                 | 0.326315191                               | 7.407675845                       | 2.530190781                             |
| 9.653774997                        | 2.788798727                                 | 0.34893999                                | 7.247100109                       | 2.29066369                              |
| 19.03745947                        | 3.193511507                                 | 0.255651983                               | 8.090518354                       | 3.404522674                             |
| 16.54394574                        | 3.109718426                                 | 0.287225005                               | 7.914297177                       | 3.10570065                              |
| 21.90699088                        | 3.262620395                                 | 0.237308017                               | 7.917066474                       | 3.696029589                             |
| 11.73627496                        | 2.889785285                                 | 0.312874878                               | 7.2835984                         | 2.66016367                              |
| 30.00178396                        | 3.480556372                                 | 0.114326813                               | 8.178917001                       | 4.302191472                             |
| 9.316595156                        | 2.749157078                                 | 0.345258537                               | 7.061538223                       | 2.130953217                             |
| 15.69476244                        | 3.065607891                                 | 0.295795397                               | 7.764492658                       | 3.05244382                              |
| 26.66710414                        | 3.356381765                                 | 0.219823053                               | 8.36002162                        | 4.170059681                             |
| 15.98000897                        | 3.077304276                                 | 0.315387184                               | 7.799437523                       | 2.871151681                             |
| 13.70177979                        | 3.0007258                                   | 0.305385221                               | 7.625171317                       | 2.8383198                               |
| 17.01257025                        | 3.124022491                                 | 0.286499657                               | 8.027920334                       | 3.084788778                             |
| 22.3454888                         | 3.297690999                                 | 0.250098056                               | 8.368518622                       | 3.696057653                             |
| 27.47927622                        | 3.260870166                                 | 0.215561078                               | 6.611543852                       | 4.275352558                             |
| 26.77553891                        | 3.365580828                                 | 0.214386946                               | 7.736314807                       | 4.120248611                             |
| 23.80915142                        | 3.328876688                                 | 0.233335169                               | 8.324563441                       | 3.882719897                             |
| 21.11837812                        | 3.270273138                                 | 0.261987756                               | 8.153759258                       | 3.517353061                             |
| 11.57136478                        | 2.894985538                                 | 0.320309942                               | 7.654341718                       | 2.602081699                             |
| 17.5284551                         | 3.125184317                                 | 0.280741929                               | 7.681849779                       | 3.19024699                              |
| 23.98920844                        | 3.338351172                                 | 0.240028578                               | 8.154164256                       | 3.823171881                             |
| 17.00216347                        | 3.117842927                                 | 0.30205304                                | 7.778003095                       | 3.041414245                             |
| 31.30944196                        | 3.495975663                                 | 0.206779048                               | 8.509603051                       | 4.465696433                             |
| 25.32706077                        | 3.325224557                                 | 0.223790564                               | 8.276023712                       | 4.019128969                             |
| 30.94219256                        | 3.496618964                                 | 0.207529065                               | 8.554332244                       | 4.40570825                              |
| 19.27060054                        | 3.206569607                                 | 0.261951631                               | 8.113843891                       | 3.395475923                             |
| 9.988616408                        | 2.77424675                                  | 0.353664871                               | 7.016883391                       | 2.33550805                              |
| 16.90743833                        | 3.14588299                                  | 0.27416277                                | 8.115615074                       | 3.18406671                              |
| 25.18510168                        | 3.327728751                                 | 0.227114336                               | 8.018099094                       | 4.024073862                             |
| 26.84841665                        | 3.305518805                                 | 0.190878653                               | 6.863103992                       | 4.150153276                             |
| 37.19615966                        | 3.620044339                                 | 0.200880122                               | 8.204957568                       | 4.822858632                             |
| 14.95546802                        | 3.061572066                                 | 0.2929022                                 | 7.882691404                       | 2.947164345                             |
| 27.50515883                        | 3.36650436                                  | 0.214146874                               | 8.024869927                       | 4.233383178                             |
| 22.13788844                        | 3.301077237                                 | 0.252316185                               | 8.253613438                       | 3.618868467                             |
| 15.90276151                        | 3.070059399                                 | 0.270594404                               | 7.612272565                       | 3.127230475                             |
| 14.4277056                         | 2.958535886                                 | 0.321847845                               | 7.399723493                       | 2.604637514                             |
| 32.62220803                        | 3.531769957                                 | 0.197327461                               | 8.444944588                       | 4.572996435                             |
| 33.27922851                        | 3.472965383                                 | 0.204393991                               | 8.568268337                       | 4.569650782                             |
| 27.64989898                        | 3.425955693                                 | 0.227330529                               | 8.364277816                       | 4.114205982                             |
| 17.96632012                        | 3.152028649                                 | 0.266312223                               | 7.93078109                        | 3.287979865                             |
| 14.24703351                        | 2.92519565                                  | 0.271074733                               | 7.583585386                       | 3.040553807                             |
| 26.32453941                        | 3.42523566                                  | 0.23343086                                | 8.407323782                       | 4.003680728                             |
| 21.67578855                        | 3.301730393                                 | 0.257236456                               | 8.439303024                       | 3.57989779                              |
| 10.63427037                        | 2.81732372                                  | 0.336759329                               | 7.229838068                       | 2.417546768                             |
| 11.27592793                        | 2.81501687                                  | 0.35649482                                | 7.11182419                        | 2.349660303                             |
| 28.40382306                        | 3.373030165                                 | 0.199096636                               | 7.434892845                       | 4.292355453                             |
| 20.98777613                        | 3.263777621                                 | 0.268155999                               | 8.109202655                       | 3.513485152                             |
| 33.91083338                        | 3.507079896                                 | 0.2038362                                 | 7.978192093                       | 4.624597995                             |
| 27.4238709                         | 3.447482678                                 | 0.241600375                               | 8.59242955                        | 4.034572261                             |
| 31.99184156                        | 3.466278906                                 | 0.188466058                               | 8.05681979                        | 4.615808018                             |
| 21.17471203                        | 3.273058531                                 | 0.257604859                               | 8.189142483                       | 3.578874093                             |
| 25.17167039                        | 3.344500507                                 | 0.24356997                                | 8.348308622                       | 3.861184502                             |
| 29.09191892                        | 3.454731395                                 | 0.21046653                                | 8.469917537                       | 4.320453646                             |
| 16.22632401                        | 3.104499307                                 | 0.302880165                               | 7.834684841                       | 2.980899868                             |
| 12.81637907                        | 2.951333894                                 | 0.321732017                               | 7.525748192                       | 2.617473583                             |
| 12.640507                          | 2.932009845                                 | 0.339885714                               | 7.547325754                       | 2.517093795                             |
| 36.18530118                        | 3.560445216                                 | 0.188462076                               | 8.533862176                       | 4.809591596                             |
| 22.64715263                        | 3.268319367                                 | 0.243541323                               | 8.064343736                       | 3.745464248                             |
| 32.30478015                        | 3.499109532                                 | 0.198600422                               | 8.29588484                        | 4.592349583                             |
| 26.60935244                        | 3.379124951                                 | 0.229498132                               | 8.334643965                       | 4.072283789                             |
| 17.05928507                        | 3.13296086                                  | 0.267429915                               | 7.95394413                        | 3.257584719                             |
| 48.03269943                        | 3.705365854                                 | 0.166826418                               | 8.41713584                        | 5.587131022                             |
| 27.32702906                        | 3.417737735                                 | 0.213259715                               | 8.368950569                       | 4.19267446                              |
| 22.43368062                        | 3.3066146                                   | 0.258921398                               | 8.275728791                       | 3.624589122                             |
| 18.00258597                        | 3.059566165                                 | 0.245515813                               | 6.675076119                       | 3.391106597                             |
| 16.92230842                        | 3.110907819                                 | 0.281302764                               | 7.900219103                       | 3.16192744                              |
| 12.11732719                        | 2.918641456                                 | 0.328957989                               | 7.533204268                       | 2.572271435                             |
| 29.68093817                        | 3.460595005                                 | 0.205772094                               | 8.334472557                       | 4.36466988                              |
| 40.9638361                         | 3.691176742                                 | 0.182837475                               | 8.856987073                       | 5.120277791                             |
| 14.17214532                        | 2.82797358                                  | 0.292383121                               | 6.725908355                       | 2.970936292                             |
| 22.86346489                        | 3.14108652                                  | 0.222861641                               | 6.31768317                        | 3.791285347                             |
| 21.34100154                        | 3.275130248                                 | 0.276424544                               | 8.152256328                       | 3.416885368                             |
| 33.51207544                        | 3.549003542                                 | 0.20392597                                | 8.25731938                        | 4.547844389                             |
| 11.43598687                        | 2.879970799                                 | 0.325985985                               | 7.346371588                       | 2.558652945                             |
| 15.2547805                         | 3.062507833                                 | 0.30042481                                | 7.824704976                       | 2.946614371                             |
| 12.96165995                        | 2.971686331                                 | 0.320263655                               | 7.652349286                       | 2.67256903                              |
| 48.5313206                         | 3.660016638                                 | 0.161672069                               | 7.85823029                        | 5.686750865                             |
| 20.25377157                        | 3.244842968                                 | 0.261020912                               | 8.112282191                       | 3.490189672                             |
| 26.36849587                        | 3.242608858                                 | 0.210022196                               | 6.746375398                       | 4.185425927                             |
| 13.58284803                        | 2.952095301                                 | 0.288684559                               | 7.380839958                       | 2.90168258                              |
| 24.87296298                        | 3.357267269                                 | 0.257236251                               | 8.096581692                       | 3.747879824                             |

| log.sigma.4.5.mm.3D_glc_m_DifferenceVariance | log.sigma.4.5.mm.3D_glc_m_ldn | log.sigma.4.5.mm.3D_glc_m_ldm | log.sigma.4.5.mm.3D_glc_m_Correlation | log.sigma.4.5.mm.3D_glc_m_Autocorrelation |
|----------------------------------------------|-------------------------------|-------------------------------|---------------------------------------|-------------------------------------------|
| 9.085103801                                  | 0.894485117                   | 0.205054163                   | 0.636512099                           | 271.1989151                               |
| 7.29501661                                   | 0.916371751                   | 0.335144499                   | 0.621676446                           | 165.2079735                               |
| 5.784681453                                  | 0.882905072                   | 0.258101229                   | 0.565252775                           | 127.9170656                               |
| 8.022610768                                  | 0.910568421                   | 0.24267811                    | 0.593127311                           | 379.1270639                               |
| 9.892174794                                  | 0.890250978                   | 0.208169455                   | 0.694392201                           | 355.2992603                               |
| 6.195466847                                  | 0.877513341                   | 0.243507509                   | 0.564850391                           | 135.1377666                               |
| 3.889351617                                  | 0.892961093                   | 0.338233364                   | 0.640728665                           | 80.00895389                               |
| 12.66974964                                  | 0.886992547                   | 0.180993009                   | 0.596246753                           | 298.1729554                               |
| 10.39070268                                  | 0.905711091                   | 0.222833347                   | 0.632064815                           | 336.9188272                               |
| 6.460210486                                  | 0.915685999                   | 0.296117577                   | 0.633078203                           | 207.9176372                               |
| 7.180690885                                  | 0.881386718                   | 0.223173739                   | 0.551184652                           | 193.1007642                               |
| 7.282682943                                  | 0.904123854                   | 0.253473988                   | 0.655745585                           | 186.1086125                               |
| 5.88381367                                   | 0.903408696                   | 0.291423616                   | 0.716125167                           | 150.1178833                               |
| 6.666753372                                  | 0.894793602                   | 0.240652575                   | 0.645926407                           | 242.261751                                |
| 7.379067793                                  | 0.900404697                   | 0.247697516                   | 0.619631016                           | 201.4465273                               |
| 5.267433113                                  | 0.948493413                   | 0.498495466                   | 0.658047097                           | 225.9325632                               |
| 8.149431928                                  | 0.885058402                   | 0.204498768                   | 0.607401013                           | 222.6706085                               |
| 9.322482013                                  | 0.896710356                   | 0.247495773                   | 0.63487815                            | 180.5271308                               |
| 11.39544832                                  | 0.884565487                   | 0.192211307                   | 0.596224803                           | 383.2259382                               |
| 5.050145904                                  | 0.913927509                   | 0.354984326                   | 0.62814455                            | 120.0538532                               |
| 4.251093823                                  | 0.932726062                   | 0.376287248                   | 0.625654495                           | 183.8806215                               |
| 6.94550082                                   | 0.908848134                   | 0.254503434                   | 0.656711344                           | 167.9969251                               |
| 6.501960772                                  | 0.916292745                   | 0.287181246                   | 0.628591192                           | 210.9758725                               |
| 7.644126402                                  | 0.890184802                   | 0.234902339                   | 0.666421903                           | 279.0361086                               |
| 4.394029854                                  | 0.894471814                   | 0.312916774                   | 0.565469174                           | 77.97315458                               |
| 10.75270329                                  | 0.888703063                   | 0.212613842                   | 0.529030951                           | 209.4515509                               |
| 4.630931147                                  | 0.937632084                   | 0.420433928                   | 0.668952789                           | 203.1077563                               |
| 5.939351778                                  | 0.904357648                   | 0.288531205                   | 0.63777624                            | 119.0324207                               |
| 8.253018875                                  | 0.884651819                   | 0.2072869                     | 0.606819347                           | 276.7191507                               |
| 7.346252881                                  | 0.920854415                   | 0.345966603                   | 0.638953592                           | 200.6834487                               |
| 5.332681525                                  | 0.910241994                   | 0.307133934                   | 0.609399831                           | 137.3057834                               |
| 6.922025683                                  | 0.921482285                   | 0.309411267                   | 0.653466325                           | 215.0589392                               |
| 8.109849022                                  | 0.902208193                   | 0.241811694                   | 0.641918028                           | 243.4169667                               |
| 8.38857779                                   | 0.853218467                   | 0.191591485                   | 0.522423545                           | 146.4305807                               |
| 8.848877649                                  | 0.879521437                   | 0.212552663                   | 0.580054959                           | 278.5314208                               |
| 8.118130974                                  | 0.894761037                   | 0.22638405                    | 0.613352299                           | 247.3262451                               |
| 8.29134861                                   | 0.91152608                    | 0.266590195                   | 0.627435848                           | 163.1388263                               |
| 4.5706303                                    | 0.911078636                   | 0.328671124                   | 0.69834122                            | 160.3317738                               |
| 6.716804404                                  | 0.912014371                   | 0.288486852                   | 0.649295589                           | 280.6270785                               |
| 8.863022884                                  | 0.893743447                   | 0.234413983                   | 0.596890374                           | 197.9721073                               |
| 7.408374224                                  | 0.92814654                    | 0.306203684                   | 0.602112297                           | 244.7380064                               |
| 10.44894506                                  | 0.887533231                   | 0.196327254                   | 0.621476321                           | 265.1505165                               |
| 8.036559975                                  | 0.885283662                   | 0.216038966                   | 0.580473031                           | 215.164832                                |
| 10.50365402                                  | 0.891797379                   | 0.202949036                   | 0.631592935                           | 284.389511                                |
| 7.285462468                                  | 0.901326338                   | 0.263117188                   | 0.629942902                           | 203.8430066                               |
| 4.276106149                                  | 0.916824531                   | 0.370408477                   | 0.60091814                            | 84.19813042                               |
| 6.45839858                                   | 0.911769585                   | 0.273880933                   | 0.644416765                           | 232.0008724                               |
| 8.202892008                                  | 0.878036282                   | 0.216539576                   | 0.589975144                           | 166.772569                                |
| 8.855572834                                  | 0.862332282                   | 0.210277242                   | 0.474693571                           | 170.4707795                               |
| 12.90578914                                  | 0.896043477                   | 0.192019925                   | 0.612924961                           | 409.2897349                               |
| 5.950856532                                  | 0.915481922                   | 0.306244181                   | 0.656052694                           | 177.5809339                               |
| 8.434188677                                  | 0.859871161                   | 0.208491487                   | 0.55636525                            | 180.9781836                               |
| 8.406726915                                  | 0.913594079                   | 0.262636824                   | 0.58496663                            | 230.3857452                               |
| 5.820880486                                  | 0.898699339                   | 0.2730872                     | 0.623062783                           | 179.3110101                               |
| 7.190322558                                  | 0.923950454                   | 0.400101335                   | 0.626078511                           | 162.0730654                               |
| 10.7867609                                   | 0.888021024                   | 0.191335713                   | 0.565361921                           | 271.959929                                |
| 10.17680575                                  | 0.888426167                   | 0.195815314                   | 0.526282092                           | 302.8122735                               |
| 9.767344022                                  | 0.90949823                    | 0.223076671                   | 0.595780552                           | 413.1077744                               |
| 6.770473875                                  | 0.901021445                   | 0.26562831                    | 0.666559404                           | 169.3904915                               |
| 4.453244276                                  | 0.88944086                    | 0.263355563                   | 0.634211335                           | 148.5039503                               |
| 9.800820235                                  | 0.895403036                   | 0.229884715                   | 0.60349275                            | 178.544889                                |
| 8.324975288                                  | 0.916403903                   | 0.263372311                   | 0.66028501                            | 264.2593099                               |
| 4.431960408                                  | 0.922564254                   | 0.366881567                   | 0.622832039                           | 125.830988                                |
| 5.471735706                                  | 0.925533095                   | 0.400359662                   | 0.596832721                           | 189.2673765                               |
| 9.347601271                                  | 0.871122974                   | 0.196781698                   | 0.556917872                           | 193.3488245                               |
| 8.123673752                                  | 0.906851726                   | 0.266556143                   | 0.614117372                           | 207.7621813                               |
| 11.27784503                                  | 0.884386825                   | 0.194682709                   | 0.580543717                           | 299.9562262                               |
| 10.5529823                                   | 0.895156028                   | 0.239796293                   | 0.62447621                            | 220.7945908                               |
| 9.71873668                                   | 0.87051718                    | 0.1819243                     | 0.580902995                           | 228.2638387                               |
| 7.842898875                                  | 0.893631025                   | 0.253077019                   | 0.617185032                           | 153.1466664                               |
| 8.934963973                                  | 0.901576934                   | 0.24842506                    | 0.598390798                           | 202.3853683                               |
| 9.59671451                                   | 0.884638812                   | 0.203004551                   | 0.608112085                           | 217.6480128                               |
| 6.918880029                                  | 0.915287125                   | 0.320078429                   | 0.607864235                           | 148.5657145                               |
| 5.711112068                                  | 0.926664134                   | 0.355389312                   | 0.616235891                           | 209.547094                                |
| 6.093575164                                  | 0.929626519                   | 0.373920174                   | 0.668453963                           | 189.2809908                               |
| 11.2553081                                   | 0.89596226                    | 0.184924679                   | 0.550510924                           | 329.2630233                               |
| 7.715126822                                  | 0.900911929                   | 0.234675437                   | 0.579842987                           | 185.6135125                               |
| 10.31079752                                  | 0.871461402                   | 0.18754772                    | 0.602139202                           | 196.0688887                               |
| 8.940028523                                  | 0.887674188                   | 0.224182943                   | 0.571477706                           | 202.8287892                               |
| 6.068247793                                  | 0.909635975                   | 0.263132274                   | 0.612856635                           | 254.044213                                |
| 14.59263439                                  | 0.873669917                   | 0.159308071                   | 0.526738263                           | 301.4484199                               |
| 8.98453476                                   | 0.895880624                   | 0.205314687                   | 0.58303622                            | 268.3458927                               |
| 8.607592586                                  | 0.913590137                   | 0.263844494                   | 0.612819231                           | 321.4486163                               |
| 6.025158141                                  | 0.869814006                   | 0.24379676                    | 0.467957428                           | 138.8665933                               |
| 6.356341527                                  | 0.904482605                   | 0.28037476                    | 0.600885259                           | 144.2282732                               |
| 5.206283328                                  | 0.92084285                    | 0.348719807                   | 0.647888141                           | 188.2521591                               |
| 9.914629945                                  | 0.886692876                   | 0.202408945                   | 0.624023954                           | 189.1347896                               |
| 13.5765971                                   | 0.88788673                    | 0.174924469                   | 0.581970497                           | 511.5710137                               |
| 4.142270069                                  | 0.888127418                   | 0.280143579                   | 0.58916269                            | 195.6219488                               |
| 7.309308376                                  | 0.867978068                   | 0.232037898                   | 0.518774721                           | 115.2705495                               |
| 9.020877931                                  | 0.918595373                   | 0.298789704                   | 0.591077744                           | 301.2367838                               |
| 12.03677421                                  | 0.883325623                   | 0.196142127                   | 0.567154757                           | 145.1919179                               |
| 4.652253431                                  | 0.898660485                   | 0.338806266                   | 0.637395255                           | 97.4213097                                |
| 6.15385026                                   | 0.915685329                   | 0.307132588                   | 0.616173659                           | 185.3925692                               |
| 5.580227755                                  | 0.912707954                   | 0.339036068                   | 0.646889797                           | 128.824927                                |
| 13.29272408                                  | 0.871274401                   | 0.149890929                   | 0.608155851                           | 400.0025595                               |
| 7.63437646                                   | 0.901803378                   | 0.257166997                   | 0.628730143                           | 294.9632053                               |
| 7.692412374                                  | 0.838929875                   | 0.202065846                   | 0.42055267                            | 92.9817528                                |
| 4.845683514                                  | 0.89814746                    | 0.286744146                   | 0.693969807                           | 174.7598215                               |
| 10.0089659                                   | 0.911441132                   | 0.260885353                   | 0.639739053                           | 241.9950259                               |

| log.sigma.4.5.mm.3D_glcm_SumEntropy | log.sigma.4.5.mm.3D_glcm_AverageIntensity | log.sigma.4.5.mm.3D_glcm_Energy | log.sigma.4.5.mm.3D_glcm_SumSquares | log.sigma.4.5.mm.3D_glcm_ClusterProminence |
|-------------------------------------|-------------------------------------------|---------------------------------|-------------------------------------|--------------------------------------------|
| 5.429580362                         | 15.83942895                               | 0.003971634                     | 39.74219978                         | 45316.61684                                |
| 5.036628873                         | 12.36312903                               | 0.007715949                     | 22.39941428                         | 17406.35316                                |
| 4.892423073                         | 10.80011864                               | 0.007252243                     | 19.792732                           | 9427.267622                                |
| 5.252400292                         | 19.20239987                               | 0.00406217                      | 27.71500742                         | 22802.06914                                |
| 5.470335529                         | 18.05292454                               | 0.004773082                     | 46.79374303                         | 58121.52004                                |
| 4.970755247                         | 11.10074696                               | 0.005682067                     | 21.10836726                         | 10377.77078                                |
| 4.667879502                         | 8.39387274                                | 0.01133324                      | 14.90212436                         | 6607.052632                                |
| 5.557402653                         | 16.64529527                               | 0.002992812                     | 46.13584631                         | 55625.12479                                |
| 5.465746626                         | 17.86933498                               | 0.003371988                     | 37.65140162                         | 44855.75491                                |
| 5.076019605                         | 14.01469823                               | 0.005825244                     | 22.47470779                         | 14305.71329                                |
| 5.112396751                         | 13.38815728                               | 0.004845013                     | 25.80724778                         | 14986.66203                                |
| 5.27870474                          | 12.99523626                               | 0.004415626                     | 30.25770796                         | 25818.7068                                 |
| 5.217548985                         | 11.44130427                               | 0.005186315                     | 27.04446672                         | 23411.29154                                |
| 5.211324649                         | 15.02700754                               | 0.004556125                     | 27.59808849                         | 19425.52442                                |
| 5.181816387                         | 13.68984472                               | 0.004998536                     | 27.73764434                         | 21702.54304                                |
| 4.559183059                         | 14.77888212                               | 0.029993664                     | 13.38782179                         | 9192.058875                                |
| 5.332042329                         | 14.30333296                               | 0.004164949                     | 34.96151286                         | 30049.46735                                |
| 5.373134482                         | 12.701521                                 | 0.003857082                     | 35.20899915                         | 34453.18068                                |
| 5.444864485                         | 19.12988858                               | 0.003956206                     | 43.18945188                         | 52385.6963                                 |
| 4.81830607                          | 10.49721696                               | 0.009120175                     | 15.69015413                         | 8830.528455                                |
| 4.716340397                         | 13.27577315                               | 0.010152715                     | 13.10375396                         | 6057.984896                                |
| 5.226809498                         | 12.28911943                               | 0.004689915                     | 28.12655922                         | 25198.94635                                |
| 5.081049241                         | 14.11685401                               | 0.006067683                     | 22.83471495                         | 16473.04198                                |
| 5.245723891                         | 16.12206874                               | 0.005063581                     | 33.41263737                         | 27855.25953                                |
| 4.690139657                         | 8.386514081                               | 0.008171625                     | 13.49896255                         | 4848.781411                                |
| 5.237314341                         | 14.03437933                               | 0.004340974                     | 32.99718119                         | 25077.35443                                |
| 4.714566317                         | 13.94457261                               | 0.017529671                     | 14.41258147                         | 8465.925663                                |
| 5.044161587                         | 10.26445268                               | 0.006003151                     | 21.77451102                         | 14063.35046                                |
| 5.333519737                         | 16.14710803                               | 0.003706895                     | 34.8396339                          | 25727.00806                                |
| 5.079969103                         | 13.73200409                               | 0.007640158                     | 22.7167093                          | 16354.8801                                 |
| 4.891889735                         | 11.25801858                               | 0.007242104                     | 17.64362983                         | 11237.36804                                |
| 5.172722591                         | 14.21806339                               | 0.005865367                     | 25.25161066                         | 19382.05543                                |
| 5.337295429                         | 15.05504662                               | 0.003860271                     | 31.89543382                         | 27326.07498                                |
| 4.728264378                         | 11.44902966                               | 0.011114311                     | 29.00815023                         | 16216.09781                                |
| 5.156401009                         | 16.20252032                               | 0.00566133                      | 32.31739227                         | 26693.12341                                |
| 5.285521579                         | 15.23492746                               | 0.003842359                     | 31.61343477                         | 22539.93273                                |
| 5.218575386                         | 12.15419649                               | 0.004665887                     | 29.30728192                         | 23927.66826                                |
| 5.005743346                         | 12.12169609                               | 0.006670785                     | 19.17400817                         | 10830.07222                                |
| 5.065539061                         | 16.33797789                               | 0.007458409                     | 25.26883954                         | 23163.63041                                |
| 5.242242433                         | 13.4827326                                | 0.004582147                     | 30.22769865                         | 24389.34359                                |
| 5.027613131                         | 15.39601569                               | 0.006840546                     | 21.80393029                         | 14909.17027                                |
| 5.471719213                         | 15.60634014                               | 0.00336948                      | 41.86892481                         | 44768.40074                                |
| 5.253133247                         | 14.09742378                               | 0.003890034                     | 30.26330817                         | 20492.91468                                |
| 5.506758774                         | 16.1973735                                | 0.003365198                     | 42.21890658                         | 48637.20373                                |
| 5.188731053                         | 13.72386109                               | 0.004767001                     | 26.45323438                         | 20146.1665                                 |
| 4.601059407                         | 8.753103735                               | 0.011426255                     | 12.56992587                         | 5199.95198                                 |
| 5.167518523                         | 14.79678474                               | 0.004736209                     | 24.39471121                         | 16261.7026                                 |
| 5.218904528                         | 12.21218095                               | 0.00456606                      | 30.8768255                          | 22155.29891                                |
| 4.764699005                         | 12.58117622                               | 0.009669033                     | 25.48835075                         | 14287.95448                                |
| 5.501243245                         | 19.70268438                               | 0.004470132                     | 46.55058784                         | 73426.79707                                |
| 5.084931365                         | 12.81315831                               | 0.006097634                     | 22.20181364                         | 15238.40205                                |
| 5.16938959                          | 12.79939902                               | 0.004599871                     | 30.86665295                         | 17882.00057                                |
| 5.197800652                         | 14.79064304                               | 0.004674546                     | 27.27422898                         | 23703.44539                                |
| 4.991411753                         | 12.89456504                               | 0.00664097                      | 21.01959128                         | 13675.92565                                |
| 4.865873596                         | 12.28621723                               | 0.015147193                     | 19.41856801                         | 13928.12551                                |
| 5.387009861                         | 16.02789808                               | 0.003567829                     | 38.07392507                         | 35000.39226                                |
| 5.350010855                         | 17.11473401                               | 0.003195008                     | 35.31159373                         | 27823.04407                                |
| 5.336577193                         | 20.03126772                               | 0.004224026                     | 33.01158083                         | 34684.27118                                |
| 5.205165136                         | 13.32603933                               | 0.005288122                     | 27.39042132                         | 22284.48583                                |
| 4.965813733                         | 11.66838883                               | 0.006424143                     | 19.44363696                         | 9909.373272                                |
| 5.322798606                         | 12.66582745                               | 0.003786167                     | 33.95720857                         | 28456.88222                                |
| 5.363985709                         | 15.75590898                               | 0.003946064                     | 32.03008271                         | 36133.68316                                |
| 4.718644448                         | 10.82959876                               | 0.010992999                     | 14.20824845                         | 8789.644591                                |
| 4.696402256                         | 13.45991295                               | 0.012501914                     | 14.21512137                         | 7260.013042                                |
| 5.097563855                         | 13.29700892                               | 0.006656752                     | 32.69957959                         | 25045.35042                                |
| 5.193262999                         | 13.92313606                               | 0.004959656                     | 28.08883338                         | 22317.05227                                |
| 5.348875489                         | 16.75611257                               | 0.005180187                     | 40.64426746                         | 45371.05651                                |
| 5.429848496                         | 14.16118231                               | 0.00334465                      | 37.4182465                          | 36253.66896                                |
| 5.323652397                         | 14.41659445                               | 0.004508917                     | 38.57086974                         | 34029.86934                                |
| 5.215397007                         | 11.70020518                               | 0.004454902                     | 28.09529845                         | 21813.29074                                |
| 5.299111292                         | 13.70766777                               | 0.004063654                     | 32.09451759                         | 24558.82611                                |
| 5.401398785                         | 14.0764911                                | 0.003353855                     | 37.88622111                         | 33621.47625                                |
| 5.008775712                         | 11.70559005                               | 0.006556053                     | 21.08090383                         | 13884.42716                                |
| 4.874006455                         | 14.18325731                               | 0.007938578                     | 17.30248963                         | 8529.092341                                |
| 4.925964611                         | 13.35099768                               | 0.010937987                     | 19.68551113                         | 15797.14751                                |
| 5.430066007                         | 17.80047204                               | 0.003354554                     | 39.84263028                         | 43614.29351                                |
| 5.151491341                         | 13.11798077                               | 0.004481657                     | 27.49961194                         | 17678.80266                                |
| 5.407612109                         | 13.20913508                               | 0.00372187                      | 41.83836761                         | 39352.27763                                |
| 5.264855551                         | 13.72004883                               | 0.003860294                     | 32.18732219                         | 21786.05358                                |
| 5.07543795                          | 15.61896043                               | 0.005098754                     | 22.70980114                         | 13492.82068                                |
| 5.522205839                         | 16.82094717                               | 0.003498608                     | 51.19547617                         | 60273.55534                                |
| 5.315485054                         | 15.96005391                               | 0.003649141                     | 33.24347107                         | 24859.06047                                |
| 5.259583738                         | 17.60458956                               | 0.004621293                     | 28.94716311                         | 26751.76397                                |
| 4.557580453                         | 11.4464917                                | 0.011573482                     | 16.78406304                         | 6326.122873                                |
| 5.033025362                         | 11.47461776                               | 0.005458924                     | 21.3883391                          | 13319.79954                                |
| 4.884592189                         | 13.33246961                               | 0.008494643                     | 17.54719544                         | 10354.90939                                |
| 5.423384721                         | 12.92462695                               | 0.003725982                     | 40.28323711                         | 40305.98803                                |
| 5.591640335                         | 22.22634812                               | 0.002668422                     | 47.07098267                         | 57313.27782                                |
| 4.637012214                         | 13.59821871                               | 0.011289403                     | 17.77149551                         | 7172.085406                                |
| 4.571421303                         | 10.16013648                               | 0.01456002                      | 23.34730779                         | 15193.96058                                |
| 5.167812627                         | 17.05231783                               | 0.006483853                     | 26.25734323                         | 24671.00482                                |
| 5.345204652                         | 11.23039764                               | 0.003879807                     | 40.04456628                         | 35781.21149                                |
| 4.809916767                         | 9.344190587                               | 0.008608295                     | 15.81885736                         | 7242.694203                                |
| 5.005386336                         | 13.20001975                               | 0.006294824                     | 20.28591481                         | 13126.93115                                |
| 4.946356344                         | 10.81299789                               | 0.007422329                     | 18.43352893                         | 10484.87241                                |
| 5.505988004                         | 19.35571752                               | 0.004949157                     | 61.59490275                         | 92831.04108                                |
| 5.216214273                         | 16.76448587                               | 0.004774347                     | 27.75551494                         | 21100.56805                                |
| 4.604525958                         | 9.149668431                               | 0.010315639                     | 22.38095673                         | 8786.145901                                |
| 5.003497609                         | 12.62858312                               | 0.007546992                     | 22.03195779                         | 13966.48632                                |
| 5.319103348                         | 15.04417672                               | 0.004948796                     | 35.39196915                         | 38324.32789                                |

| log.sigma.4.5.mm.3D_glc_m_SumAverage | log.sigma.4.5.mm.3D_glc_m_Lmc2 | log.sigma.4.5.mm.3D_glc_m_Lmc1 | log.sigma.4.5.mm.3D_glc_m_DifferenceAverage | log.sigma.4.5.mm.3D_glc_m_Id |
|--------------------------------------|--------------------------------|--------------------------------|---------------------------------------------|------------------------------|
| 31.39640705                          | 0.921679621                    | -0.209340861                   | 4.264747356                                 | 0.299479316                  |
| 24.6344241                           | 0.837094586                    | -0.153420035                   | 2.953920928                                 | 0.41052328                   |
| 21.60023728                          | 0.889697989                    | -0.197929195                   | 3.277659433                                 | 0.349763013                  |
| 38.08262679                          | 0.789320654                    | -0.121763542                   | 3.745925843                                 | 0.332867221                  |
| 35.94565161                          | 0.968826697                    | -0.300365049                   | 4.221621744                                 | 0.303460977                  |
| 22.20149393                          | 0.839908212                    | -0.151403351                   | 3.444618549                                 | 0.337642369                  |
| 16.78774548                          | 0.899427136                    | -0.231181034                   | 2.472204501                                 | 0.416500594                  |
| 32.91158185                          | 0.889251205                    | -0.169312382                   | 4.894758215                                 | 0.275799132                  |
| 35.39173553                          | 0.838967462                    | -0.137902139                   | 4.100047993                                 | 0.314733116                  |
| 27.87606352                          | 0.797772278                    | -0.130105257                   | 3.039524978                                 | 0.380276389                  |
| 26.756823                            | 0.845591865                    | -0.15237089                    | 3.883457795                                 | 0.316546518                  |
| 25.84074609                          | 0.853594287                    | -0.157714259                   | 3.503367869                                 | 0.343941624                  |
| 22.87121414                          | 0.854195003                    | -0.165458808                   | 2.978449416                                 | 0.37822891                   |
| 29.98338103                          | 0.847184879                    | -0.152958172                   | 3.503079829                                 | 0.334498698                  |
| 27.20637354                          | 0.86828745                     | -0.166643758                   | 3.537938246                                 | 0.339430025                  |
| 29.48596238                          | 0.867962627                    | -0.200304629                   | 1.880548974                                 | 0.548647457                  |
| 28.43196819                          | 0.898473017                    | -0.189082029                   | 4.159521718                                 | 0.300296201                  |
| 25.21634781                          | 0.83163108                     | -0.141872712                   | 3.841235903                                 | 0.335646319                  |
| 37.81743513                          | 0.931130462                    | -0.219542304                   | 4.751391855                                 | 0.285588888                  |
| 20.99443392                          | 0.793456644                    | -0.135696735                   | 2.530190781                                 | 0.430434319                  |
| 26.51874027                          | 0.767334892                    | -0.125971192                   | 2.29066369                                  | 0.448615837                  |
| 24.4900507                           | 0.844715808                    | -0.152195382                   | 3.404522674                                 | 0.346193337                  |
| 28.08335957                          | 0.802088943                    | -0.131245812                   | 3.10570065                                  | 0.373125105                  |
| 32.08590221                          | 0.921265014                    | -0.217486737                   | 3.696029589                                 | 0.328336577                  |
| 16.77302816                          | 0.763398126                    | -0.123335112                   | 2.66016367                                  | 0.397175226                  |
| 27.77393881                          | 0.88262447                     | -0.171822055                   | 4.302191472                                 | 0.305483487                  |
| 27.83414114                          | 0.838672156                    | -0.168188876                   | 2.130953217                                 | 0.485826436                  |
| 20.51562498                          | 0.831077634                    | -0.151744892                   | 3.05244382                                  | 0.37381221                   |
| 32.01501033                          | 0.833813015                    | -0.142408776                   | 4.170059681                                 | 0.301225725                  |
| 27.32585834                          | 0.846260752                    | -0.157731503                   | 2.871151681                                 | 0.419651469                  |
| 22.50514647                          | 0.762785733                    | -0.119623918                   | 2.8383198                                   | 0.390598433                  |
| 28.22493437                          | 0.807249268                    | -0.139116897                   | 3.08478877                                  | 0.390612967                  |
| 29.90234371                          | 0.827172281                    | -0.137365596                   | 3.696057653                                 | 0.332670072                  |
| 22.89805932                          | 0.990495694                    | -0.466259342                   | 4.275352558                                 | 0.287981752                  |
| 32.26295442                          | 0.945231708                    | -0.253571556                   | 4.120248611                                 | 0.30721704                   |
| 30.23739612                          | 0.814889809                    | -0.130677962                   | 3.882719897                                 | 0.31917965                   |
| 24.12219359                          | 0.807033345                    | -0.130985187                   | 3.517353061                                 | 0.353567786                  |
| 24.24339219                          | 0.819808612                    | -0.146448721                   | 2.602081698                                 | 0.409495877                  |
| 32.53106385                          | 0.887058519                    | -0.19334288                    | 3.19024699                                  | 0.373287695                  |
| 26.86092017                          | 0.859689621                    | -0.156218079                   | 3.823171881                                 | 0.326306584                  |
| 30.47021075                          | 0.840883365                    | -0.152512664                   | 3.041414245                                 | 0.387873333                  |
| 30.9589304                           | 0.890472937                    | -0.174396774                   | 4.465696433                                 | 0.290785858                  |
| 28.13611704                          | 0.816733684                    | -0.133628677                   | 4.019128969                                 | 0.310197848                  |
| 32.14057492                          | 0.893131128                    | -0.175423412                   | 4.40570825                                  | 0.296953781                  |
| 27.38313169                          | 0.819723075                    | -0.137771596                   | 3.395475923                                 | 0.352442252                  |
| 17.50620747                          | 0.768281119                    | -0.132724078                   | 2.33550805                                  | 0.442861522                  |
| 29.44574845                          | 0.781440302                    | -0.118748444                   | 3.18406671                                  | 0.362756191                  |
| 24.39081466                          | 0.896421239                    | -0.188146525                   | 4.024073862                                 | 0.309940663                  |
| 25.16235245                          | 0.980706538                    | -0.388119727                   | 4.150153276                                 | 0.307158993                  |
| 38.99325651                          | 0.952131894                    | -0.254550261                   | 4.822858632                                 | 0.284026492                  |
| 25.56123306                          | 0.807764615                    | -0.135598442                   | 2.947164345                                 | 0.389405191                  |
| 25.59879804                          | 0.849931309                    | -0.154482943                   | 4.233383178                                 | 0.301850839                  |
| 29.31930148                          | 0.769179101                    | -0.11453349                    | 3.618868467                                 | 0.349741413                  |
| 25.78671565                          | 0.879601838                    | -0.182432668                   | 3.127230475                                 | 0.363144512                  |
| 24.51833847                          | 0.841063469                    | -0.16383571                    | 2.604637514                                 | 0.464959092                  |
| 31.68487848                          | 0.869349043                    | -0.159540155                   | 4.572996435                                 | 0.286477626                  |
| 33.7543752                           | 0.791479558                    | -0.121935656                   | 4.569650782                                 | 0.289741031                  |
| 39.65604284                          | 0.85480878                     | -0.152662571                   | 4.114205982                                 | 0.31470005                   |
| 24.60519997                          | 0.885020123                    | -0.181444088                   | 3.287979867                                 | 0.355726898                  |
| 23.33677766                          | 0.848269011                    | -0.167914667                   | 3.040553805                                 | 0.356548461                  |
| 25.18740113                          | 0.801117697                    | -0.123035591                   | 4.003680728                                 | 0.320842051                  |
| 31.20965295                          | 0.806554804                    | -0.127586196                   | 3.57989779                                  | 0.35036705                   |
| 21.64314711                          | 0.79230883                     | -0.141458691                   | 2.417546768                                 | 0.440234536                  |
| 26.896742                            | 0.827438633                    | -0.161194803                   | 2.349660303                                 | 0.465609236                  |
| 26.49901595                          | 0.969254256                    | -0.318890871                   | 4.292355453                                 | 0.293878802                  |
| 27.65285496                          | 0.83265553                     | -0.143487377                   | 3.513485152                                 | 0.352844026                  |
| 33.25504225                          | 0.951666414                    | -0.262366346                   | 4.624597995                                 | 0.288042214                  |
| 28.14153628                          | 0.804707237                    | -0.122835338                   | 4.034572261                                 | 0.327634544                  |
| 28.7264629                           | 0.929271333                    | -0.22290259                    | 4.615808018                                 | 0.27861677                   |
| 23.33912222                          | 0.810683071                    | -0.130259693                   | 3.578874093                                 | 0.342290655                  |
| 27.13396378                          | 0.79964529                     | -0.128162501                   | 3.861184502                                 | 0.336394234                  |
| 27.94717018                          | 0.861122896                    | -0.15348281                    | 4.320453646                                 | 0.297230282                  |
| 23.3375297                           | 0.768905328                    | -0.120059057                   | 2.980899868                                 | 0.398985717                  |
| 28.23466207                          | 0.785083569                    | -0.130504525                   | 2.617473583                                 | 0.429955349                  |
| 26.58104882                          | 0.807178016                    | -0.140711435                   | 2.517093795                                 | 0.444470948                  |
| 35.05793721                          | 0.881970341                    | -0.168183169                   | 4.809591596                                 | 0.279502957                  |
| 26.08977017                          | 0.839423839                    | -0.147770853                   | 3.745464248                                 | 0.326962528                  |
| 26.21638532                          | 0.91632906                     | -0.201013926                   | 4.592349583                                 | 0.282709445                  |
| 27.21835633                          | 0.800938834                    | -0.128567569                   | 4.072283789                                 | 0.315470844                  |
| 31.02677623                          | 0.783409224                    | -0.12184116                    | 3.257584719                                 | 0.353549464                  |
| 33.16451376                          | 0.94696282                     | -0.241619503                   | 5.587131022                                 | 0.252826493                  |
| 31.5892105                           | 0.828265383                    | -0.13591386                    | 4.19267446                                  | 0.30045988                   |
| 34.85965252                          | 0.812415441                    | -0.133448522                   | 3.624589122                                 | 0.350163704                  |
| 22.8929834                           | 0.955579893                    | -0.310539357                   | 3.391106597                                 | 0.338743296                  |
| 22.93120836                          | 0.762870318                    | -0.119110556                   | 3.16192744                                  | 0.367452601                  |
| 26.61720534                          | 0.779122159                    | -0.12984353                    | 2.572721435                                 | 0.424842098                  |
| 25.6693544                           | 0.900669846                    | -0.185970161                   | 4.36466988                                  | 0.296610413                  |
| 43.98228108                          | 0.8539972                      | -0.142643814                   | 5.120277791                                 | 0.268760286                  |
| 27.19643742                          | 0.949174536                    | -0.29959835                    | 2.970936292                                 | 0.36865812                   |
| 20.32027297                          | 0.98337189                     | -0.431875966                   | 3.791285347                                 | 0.325925051                  |
| 33.81749177                          | 0.800690613                    | -0.128658506                   | 3.416885368                                 | 0.378859424                  |
| 22.22606688                          | 0.896208383                    | -0.181808031                   | 4.547844389                                 | 0.290625183                  |
| 18.68838117                          | 0.821922017                    | -0.152544368                   | 2.558652945                                 | 0.41750045                   |
| 26.32348358                          | 0.769011867                    | -0.120880659                   | 2.946614371                                 | 0.389673643                  |
| 21.62328065                          | 0.785379455                    | -0.12848449                    | 2.67256903                                  | 0.416613673                  |
| 38.08198708                          | 0.98572001                     | -0.370119874                   | 5.686750865                                 | 0.243972132                  |
| 33.34554678                          | 0.847772089                    | -0.150639364                   | 3.490189672                                 | 0.346483344                  |
| 18.29933686                          | 0.97283156                     | -0.35947912                    | 4.185425927                                 | 0.297535989                  |
| 25.25716625                          | 0.922942553                    | -0.233885533                   | 2.90168258                                  | 0.375365772                  |
| 29.684893                            | 0.919657899                    | -0.21059144                    | 3.747879824                                 | 0.347085486                  |

| log.sigma.4.5.mm.3D_glcm_ClusterTendency | log.sigma.4.5.mm.3D_firstorder_InterquartileRange | log.sigma.4.5.mm.3D_firstorder_Skewness | log.sigma.4.5.mm.3D_firstorder_Uniformity |
|------------------------------------------|---------------------------------------------------|-----------------------------------------|-------------------------------------------|
| 127.4214044                              | 213.3373852                                       | 0.17447898                              | 0.044848285                               |
| 70.46358786                              | 136.8523598                                       | 0.40424824                              | 0.065074089                               |
| 62.03043522                              | 177.5179417                                       | 0.134357525                             | 0.062010236                               |
| 89.05104152                              | 196.3603058                                       | -0.075441853                            | 0.050494835                               |
| 157.4812887                              | 234.9963264                                       | -0.246974348                            | 0.043877686                               |
| 65.9719157                               | 179.0614794                                       | -0.223080373                            | 0.060193639                               |
| 48.84200027                              | 120.4314346                                       | 0.383387924                             | 0.077794116                               |
| 146.6447633                              | 253.8022175                                       | -0.043806696                            | 0.040135298                               |
| 122.8082224                              | 215.2356606                                       | 0.097875769                             | 0.04386729                                |
| 70.63230222                              | 155.1713047                                       | 0.468967278                             | 0.061500349                               |
| 79.43505257                              | 198.8698502                                       | -0.32890127                             | 0.056095004                               |
| 96.9338322                               | 189.3769684                                       | 0.347340712                             | 0.051559788                               |
| 92.50253797                              | 187.7154884                                       | 0.381901261                             | 0.053991235                               |
| 89.31240468                              | 196.9120045                                       | -0.252219122                            | 0.05362086                                |
| 86.02348472                              | 171.130497                                        | 0.261736511                             | 0.055845074                               |
| 43.27865975                              | 68.98709393                                       | 0.343042423                             | 0.116667273                               |
| 108.8755936                              | 206.9243908                                       | -0.253139861                            | 0.049638345                               |
| 111.1249862                              | 212.3059769                                       | 0.436795098                             | 0.047589434                               |
| 137.9158459                              | 215.0585499                                       | -0.557434555                            | 0.046574792                               |
| 51.09333444                              | 129.1017723                                       | 0.398818696                             | 0.073754324                               |
| 41.92310525                              | 116.0039989                                       | 0.331456919                             | 0.079599707                               |
| 91.20501613                              | 184.3486443                                       | 0.372163497                             | 0.054660627                               |
| 71.7425317                               | 148.5554848                                       | 0.444361333                             | 0.064555872                               |
| 108.449919                               | 204.3069382                                       | -0.343402702                            | 0.050384464                               |
| 42.25957522                              | 129.1344486                                       | 0.31023164                              | 0.074153431                               |
| 96.28956675                              | 200.1778364                                       | 0.272721369                             | 0.049236353                               |
| 46.98545121                              | 101.4512844                                       | 0.516283335                             | 0.090529416                               |
| 70.85597386                              | 160.5430927                                       | 0.388981913                             | 0.060200469                               |
| 108.4024472                              | 245.5644073                                       | -0.151855854                            | 0.046879118                               |
| 71.91961746                              | 150.6947656                                       | 0.17418654                              | 0.062662146                               |
| 56.41657757                              | 143.6675968                                       | 0.52896654                              | 0.068365149                               |
| 80.56301711                              | 169.4065666                                       | 0.420670606                             | 0.059176565                               |
| 101.8311264                              | 211.8345337                                       | 0.044014774                             | 0.048304549                               |
| 88.5533247                               | 198.1806831                                       | 0.018366417                             | 0.05510355                                |
| 99.62646277                              | 185.5193796                                       | -0.504917919                            | 0.055341849                               |
| 98.77567469                              | 232.0250225                                       | -0.05387023                             | 0.048880992                               |
| 91.77452561                              | 197.6617804                                       | 0.552200739                             | 0.053686343                               |
| 65.1246679                               | 158.0728016                                       | 0.034201633                             | 0.063330073                               |
| 81.64715576                              | 133.9328213                                       | -0.554789135                            | 0.06662842                                |
| 94.27603137                              | 192.0901947                                       | 0.007572029                             | 0.0523182                                 |
| 67.46484901                              | 143.6224527                                       | 0.263135079                             | 0.063171867                               |
| 133.2952779                              | 237.3201675                                       | -0.07945045                             | 0.043587985                               |
| 94.22308586                              | 226.6223602                                       | -0.203435856                            | 0.049787773                               |
| 135.3313321                              | 221.1310654                                       | -0.019259577                            | 0.043120048                               |
| 84.76663616                              | 185.1439056                                       | 0.224320963                             | 0.053867947                               |
| 40.28108709                              | 133.1647596                                       | 0.679886357                             | 0.080028864                               |
| 77.85145111                              | 171.3272362                                       | 0.14845329                              | 0.056121309                               |
| 97.08992908                              | 220.139369                                        | -0.177458631                            | 0.05059593                                |
| 75.10498637                              | 159.2902527                                       | -0.296103423                            | 0.061706393                               |
| 153.3861586                              | 179.7369614                                       | -0.485399533                            | 0.051305823                               |
| 71.86206481                              | 166.4055367                                       | 0.332887719                             | 0.060983424                               |
| 95.96145297                              | 255.4517756                                       | -0.2236743                              | 0.052106286                               |
| 84.03381001                              | 175.5234222                                       | 0.406720606                             | 0.053979232                               |
| 68.07877246                              | 146.9249535                                       | -0.262720514                            | 0.06318981                                |
| 61.5546578                               | 99.74084282                                       | 0.547892039                             | 0.089683554                               |
| 116.4249807                              | 213.6368275                                       | -0.098554742                            | 0.045882887                               |
| 104.9879979                              | 237.4700928                                       | 0.020891955                             | 0.044563091                               |
| 107.2376406                              | 179.1852722                                       | -0.497759065                            | 0.054567727                               |
| 89.9512029                               | 186.1013122                                       | 0.193457512                             | 0.054585298                               |
| 63.52751435                              | 165.3852196                                       | -0.155631365                            | 0.06175394                                |
| 106.0198758                              | 234.7347412                                       | 0.343365813                             | 0.047893383                               |
| 104.6392236                              | 196.0623302                                       | 0.320423608                             | 0.050123225                               |
| 45.51600971                              | 104.6419163                                       | 0.471850499                             | 0.083649312                               |
| 44.88171345                              | 110.7754173                                       | 0.62383682                              | 0.080861868                               |
| 99.27975484                              | 199.8271065                                       | -0.080017332                            | 0.052050373                               |
| 87.29637243                              | 175.5958099                                       | 0.490523363                             | 0.055889583                               |
| 127.2147678                              | 198.8083029                                       | -0.410997655                            | 0.049112319                               |
| 118.6190383                              | 226.2204208                                       | 0.220421371                             | 0.045580443                               |
| 119.6119238                              | 229.5797174                                       | -0.36507879                             | 0.050352913                               |
| 89.02078266                              | 185.03405                                         | 0.39881903                              | 0.053738006                               |
| 98.43074113                              | 211.3242283                                       | 0.356441955                             | 0.050407072                               |
| 118.4285538                              | 246.4568405                                       | 0.06355415                              | 0.043851563                               |
| 65.82821553                              | 143.212491                                        | 0.512756995                             | 0.064780271                               |
| 53.79212397                              | 136.6478314                                       | 0.400077042                             | 0.069816207                               |
| 63.18485064                              | 107.3422384                                       | 0.712083613                             | 0.078347193                               |
| 123.8844701                              | 248.9135017                                       | -0.031331347                            | 0.043521409                               |
| 84.28722809                              | 209.0788574                                       | 0.065486484                             | 0.052560374                               |
| 129.0604965                              | 237.3875675                                       | 0.127325838                             | 0.043681806                               |
| 96.98524778                              | 224.1314392                                       | 0.202085162                             | 0.049031139                               |
| 70.5559819                               | 172.7735214                                       | 0.209065779                             | 0.059047749                               |
| 153.3890309                              | 264.3661221                                       | -0.139437373                            | 0.038840073                               |
| 102.7694984                              | 227.6114502                                       | -0.140946248                            | 0.04790297                                |
| 93.01691373                              | 188.7289009                                       | 0.300597397                             | 0.054036143                               |
| 49.13366617                              | 130.0939255                                       | -0.382076806                            | 0.082330559                               |
| 67.95153169                              | 173.950695                                        | 0.422464588                             | 0.059482397                               |
| 56.62602454                              | 129.0715399                                       | 0.615779617                             | 0.073412516                               |
| 127.1525994                              | 238.5867853                                       | 0.238111092                             | 0.043701799                               |
| 152.4230108                              | 258.4961567                                       | -0.499668618                            | 0.042294944                               |
| 56.91383673                              | 193.7077255                                       | -0.067297685                            | 0.066977216                               |
| 70.52576628                              | 159.5203896                                       | 0.275499194                             | 0.074829932                               |
| 82.65774906                              | 162.1300964                                       | 0.246021928                             | 0.058638756                               |
| 120.1137403                              | 244.1566882                                       | 0.322039533                             | 0.044551357                               |
| 51.83944258                              | 139.1168056                                       | 0.312071206                             | 0.069385457                               |
| 63.88279614                              | 155.8610964                                       | 0.353287916                             | 0.063802942                               |
| 60.65489593                              | 153.512022                                        | 0.259246537                             | 0.065346122                               |
| 197.9790821                              | 326.7150574                                       | -0.371983714                            | 0.040197472                               |
| 88.11149168                              | 177.4049282                                       | -0.102916668                            | 0.053052231                               |
| 63.15533107                              | 181.5016937                                       | -0.011764418                            | 0.061273052                               |
| 74.54498313                              | 148.3801708                                       | -0.464220935                            | 0.065127645                               |
| 111.6145311                              | 194.4519958                                       | 0.344811374                             | 0.048628098                               |



| log.sigma.4.5.mm.3D_firstorder_MeanAbsoluteDeviation | log.sigma.4.5.mm.3D_firstorder_Energy | log.sigma.4.5.mm.3D_firstorder_RobustMeanAbsoluteDeviation | log.sigma.4.5.mm.3D_firstorder_Median |
|------------------------------------------------------|---------------------------------------|------------------------------------------------------------|---------------------------------------|
| 127.5819629                                          | 18784892.05                           | 88.60925209                                                | -33.04889107                          |
| 90.03384104                                          | 29833855.76                           | 59.25050212                                                | -24.91845131                          |
| 94.89950772                                          | 8235041.658                           | 70.61568466                                                | -78.35889435                          |
| 111.8015484                                          | 50627870.88                           | 80.45383106                                                | 19.72442627                           |
| 137.2173032                                          | 10449930.63                           | 99.17328148                                                | -12.98468208                          |
| 98.38141271                                          | 14530335.73                           | 72.52505183                                                | -79.34416962                          |
| 76.50875727                                          | 3230062.088                           | 52.56982688                                                | 3.220030546                           |
| 145.8390195                                          | 32909382.42                           | 107.0700343                                                | -12.26688242                          |
| 128.4458447                                          | 55308224.75                           | 90.22682369                                                | -36.56697464                          |
| 93.92319775                                          | 46899897.24                           | 65.70509953                                                | -44.99240875                          |
| 109.3699371                                          | 17249406.62                           | 81.94963406                                                | -38.21777725                          |
| 110.7091185                                          | 29555207.92                           | 79.12759484                                                | -40.43164825                          |
| 107.8736113                                          | 36064507.5                            | 78.60606264                                                | -1.061830699                          |
| 110.1816579                                          | 19427246.59                           | 82.03111139                                                | 8.737744331                           |
| 103.2581464                                          | 16243412.85                           | 71.82176538                                                | 31.52790642                           |
| 60.04576691                                          | 54149476.97                           | 32.53402404                                                | 2.358610392                           |
| 119.2531082                                          | 17703525                              | 85.71954512                                                | -46.85752678                          |
| 121.811816                                           | 52606892.56                           | 87.7985532                                                 | -32.60829735                          |
| 132.1242039                                          | 16118713.39                           | 90.87204567                                                | 33.64246941                           |
| 78.67693325                                          | 29679509.27                           | 53.38180432                                                | -19.160923                            |
| 71.91773858                                          | 58000098.11                           | 48.81291063                                                | -57.15045166                          |
| 104.5658936                                          | 29078962.6                            | 74.71724909                                                | -6.350009441                          |
| 91.31633655                                          | 39492583.23                           | 61.88867498                                                | -45.68045044                          |
| 116.6135317                                          | 9621328.507                           | 86.13273067                                                | 34.84367371                           |
| 76.99130192                                          | 16547834.03                           | 55.074022                                                  | -76.26910782                          |
| 116.0980119                                          | 16132424.3                            | 81.9993987                                                 | -64.60771179                          |
| 69.76083656                                          | 31841670.02                           | 43.7779093                                                 | -18.5765419                           |
| 94.72996024                                          | 26919686.3                            | 66.60016571                                                | -78.69030762                          |
| 126.6559894                                          | 39115892.69                           | 97.98215586                                                | -1.559182048                          |
| 93.13714867                                          | 46994171.12                           | 63.22966215                                                | -61.93058586                          |
| 85.6049965                                           | 43318606.06                           | 60.00333693                                                | -60.12175369                          |
| 99.5668343                                           | 93781779.89                           | 69.43095559                                                | -1.534805477                          |
| 117.9477036                                          | 42436022.13                           | 85.7295759                                                 | -7.41683197                           |
| 110.9181966                                          | 2028553.125                           | 82.8658532                                                 | 39.60605431                           |
| 109.7883094                                          | 6676504.748                           | 76.36982247                                                | -18.5664854                           |
| 121.5031128                                          | 43238732.22                           | 93.26218352                                                | -22.84551144                          |
| 111.5803695                                          | 55826273.8                            | 81.98479669                                                | -52.24685478                          |
| 91.21176796                                          | 41843222.17                           | 66.3427503                                                 | 3.23551023                            |
| 95.32545178                                          | 13190190.18                           | 60.93863378                                                | 20.68393135                           |
| 111.5923011                                          | 22192403.04                           | 78.13227297                                                | -32.53975296                          |
| 91.11944019                                          | 21445423.85                           | 61.25126546                                                | -29.9211216                           |
| 134.903513                                           | 26793238.08                           | 98.83392648                                                | -18.43029213                          |
| 119.624805                                           | 36349857.41                           | 91.42592267                                                | -31.32967758                          |
| 133.0249675                                          | 28159483.79                           | 94.62104035                                                | -10.43830109                          |
| 106.9698988                                          | 32711793.51                           | 76.80936096                                                | -13.59192133                          |
| 77.46685566                                          | 22427920.61                           | 55.86315971                                                | -52.9764843                           |
| 99.81246199                                          | 65578481.29                           | 70.94031338                                                | 6.534384251                           |
| 118.1921564                                          | 16145919.89                           | 89.04122142                                                | -70.4032135                           |
| 96.11428124                                          | 1976751.409                           | 65.3507536                                                 | 11.31532669                           |
| 129.3346413                                          | 14663863.62                           | 82.02076885                                                | 27.39900208                           |
| 93.92300705                                          | 47988987.76                           | 66.63476665                                                | -13.46890163                          |
| 126.4523073                                          | 25525354.49                           | 102.5003064                                                | -82.88767242                          |
| 105.8081259                                          | 69390517.86                           | 73.14502412                                                | -24.69505119                          |
| 91.80387703                                          | 7968776.638                           | 63.26838359                                                | 2.371567249                           |
| 76.11122077                                          | 72864161.43                           | 46.15424974                                                | -4.566620827                          |
| 126.5251142                                          | 23697707.66                           | 90.88571191                                                | -42.58376694                          |
| 127.4101916                                          | 55944035.45                           | 95.55839504                                                | -44.84646225                          |
| 114.4962512                                          | 28307753.71                           | 76.18078934                                                | 6.501895905                           |
| 105.8125886                                          | 17396533.28                           | 74.76093842                                                | -67.90420151                          |
| 91.91801468                                          | 11979459.96                           | 67.1606714                                                 | -24.06128883                          |
| 125.7235554                                          | 50208605.92                           | 95.35870893                                                | -46.93196869                          |
| 113.1061837                                          | 111520729                             | 79.07419282                                                | 0.533398002                           |
| 70.47725064                                          | 27470564.88                           | 45.82300171                                                | 11.62539673                           |
| 73.8996289                                           | 26696933.28                           | 48.59289586                                                | -29.38769531                          |
| 114.420414                                           | 4976060.305                           | 82.50213694                                                | -56.20290756                          |
| 105.0836731                                          | 28607806.35                           | 72.99734518                                                | 17.49959183                           |
| 127.0676385                                          | 10943728.94                           | 85.16959068                                                | -17.91279316                          |
| 126.1582907                                          | 76871724.04                           | 91.30945762                                                | -1.0517205                            |
| 128.3749053                                          | 15615799.48                           | 91.99168767                                                | -71.18259048                          |
| 106.7855123                                          | 35374327.28                           | 76.73374459                                                | -27.662714                            |
| 116.6500132                                          | 61852264.04                           | 85.80783949                                                | -39.28856659                          |
| 131.2847569                                          | 30668672.09                           | 98.65918404                                                | -43.42778015                          |
| 88.9007133                                           | 67741255.44                           | 61.16993045                                                | -21.81886101                          |
| 82.12910158                                          | 77176995.27                           | 57.70987068                                                | -35.66366386                          |
| 79.88320838                                          | 111734214.3                           | 49.03296374                                                | 7.685521841                           |
| 134.570364                                           | 33290151.13                           | 99.23992357                                                | -43.53464317                          |
| 111.2937791                                          | 25358472.07                           | 84.24593101                                                | -65.82236481                          |
| 131.7477148                                          | 18391020.29                           | 97.02468858                                                | -71.85259628                          |
| 118.3898908                                          | 48092511.83                           | 89.77218236                                                | -96.83890915                          |
| 97.22530959                                          | 45872043.23                           | 71.21715389                                                | -55.47480392                          |
| 151.729816                                           | 27502824.73                           | 110.7642814                                                | -129.3307571                          |
| 121.581994                                           | 29481818.33                           | 92.37408411                                                | -20.96928024                          |
| 107.4722315                                          | 53423129.37                           | 74.21037687                                                | 16.83238411                           |
| 76.14387762                                          | 1456449.843                           | 51.62759228                                                | 21.23301506                           |
| 96.86199493                                          | 47741145.34                           | 70.42432164                                                | -7.09273243                           |
| 81.37392346                                          | 59363745.61                           | 55.18984735                                                | -20.99051285                          |
| 133.215211                                           | 22011461.52                           | 99.60024575                                                | -54.18372154                          |
| 144.6816176                                          | 52549553.88                           | 106.1039297                                                | -24.92644501                          |
| 97.50529612                                          | 2461153.924                           | 74.16277916                                                | -31.05732155                          |
| 95.14692133                                          | 1645999.842                           | 62.85745596                                                | -24.90848923                          |
| 100.9783746                                          | 69565111.37                           | 67.22430414                                                | -11.24271965                          |
| 131.5373398                                          | 23659109.76                           | 98.40058681                                                | -100.0638618                          |
| 82.40833323                                          | 12973074.15                           | 58.97088807                                                | -49.65940857                          |
| 90.66472972                                          | 55588706.3                            | 64.13872908                                                | -30.9143734                           |
| 89.66968738                                          | 17152280.08                           | 64.76623292                                                | -5.121492624                          |
| 173.1381387                                          | 12465386.75                           | 132.3189637                                                | -59.51681137                          |
| 108.0235189                                          | 22171944.76                           | 75.13706921                                                | 11.88215446                           |
| 99.75584207                                          | 1789676.599                           | 73.9641414                                                 | 12.75130272                           |
| 90.44882751                                          | 4927951.463                           | 63.42780356                                                | 30.85391045                           |
| 119.5115644                                          | 21234607.84                           | 81.53382778                                                | -56.18813324                          |

| log.sigma.4.5.mm.3D_firstorder_TotalEnergy | log.sigma.4.5.mm.3D_firstorder_Maximum | log.sigma.4.5.mm.3D_firstorder_RootMeanSquared | log.sigma.4.5.mm.3D_firstorder_90Percentile | log.sigma.4.5.mm.3D_firstorder_Minimum |
|--------------------------------------------|----------------------------------------|------------------------------------------------|---------------------------------------------|----------------------------------------|
| 507192085.3                                | 417.1393738                            | 163.1180426                                    | 176.8087997                                 | -401.0256958                           |
| 805514105.4                                | 405.2608032                            | 119.8495602                                    | 126.0065033                                 | -322.6225586                           |
| 222346124.8                                | 221.6657715                            | 137.7488667                                    | 77.58814621                                 | -346.3121033                           |
| 1366952514                                 | 437.6737671                            | 138.6131784                                    | 195.9908203                                 | -427.155304                            |
| 282148126.9                                | 302.6502991                            | 170.6119628                                    | 213.1920105                                 | -456.6540833                           |
| 392319064.8                                | 194.4595032                            | 150.3253896                                    | 51.30500031                                 | -368.0233459                           |
| 87211676.39                                | 256.2740173                            | 97.90175673                                    | 161.3166779                                 | -193.0821533                           |
| 866440325.3                                | 449.4336243                            | 178.959017                                     | 196.7314117                                 | -425.3314819                           |
| 1493322068                                 | 433.2673645                            | 163.1051278                                    | 183.7490082                                 | -456.9980774                           |
| 1266297225                                 | 377.6947632                            | 123.039693                                     | 130.3019669                                 | -356.5655518                           |
| 465733978.6                                | 256.7643433                            | 144.4223226                                    | 92.48349915                                 | -382.313385                            |
| 797990614                                  | 413.1094055                            | 141.2189271                                    | 148.7605057                                 | -349.9212646                           |
| 973741702.5                                | 372.4314575                            | 131.8668484                                    | 185.3865952                                 | -264.5558167                           |
| 524535658.1                                | 310.8047485                            | 131.8210373                                    | 153.4020767                                 | -354.7445374                           |
| 438572146.8                                | 427.7446899                            | 133.5301856                                    | 192.3210754                                 | -286.4067078                           |
| 1462035878                                 | 432.0059814                            | 88.28735045                                    | 111.7664688                                 | -455.3651733                           |
| 477995175.1                                | 304.6390381                            | 159.2583321                                    | 112.0827675                                 | -424.4124146                           |
| 1420386099                                 | 447.5340576                            | 150.1955452                                    | 195.7426727                                 | -321.7028198                           |
| 435205261.7                                | 373.8947144                            | 166.4193013                                    | 210.6874252                                 | -453.2406921                           |
| 801346750.4                                | 346.3106384                            | 102.9370703                                    | 112.428627                                  | -254.7250061                           |
| 1566002649                                 | 362.9118652                            | 105.368981                                     | 70.45292206                                 | -373.5119019                           |
| 785131990.2                                | 497.1899109                            | 130.0245116                                    | 169.269162                                  | -299.7278442                           |
| 1066299747                                 | 401.3722534                            | 120.2532772                                    | 129.6381226                                 | -368.8803711                           |
| 259775869.7                                | 305.0290222                            | 141.4311209                                    | 187.4746857                                 | -364.5426331                           |
| 446791518.8                                | 237.2254333                            | 117.2350127                                    | 63.53211403                                 | -272.9027405                           |
| 435575456                                  | 389.2144165                            | 152.4649735                                    | 146.5944855                                 | -377.8259277                           |
| 859725090.6                                | 385.1824341                            | 95.84812896                                    | 113.1601334                                 | -338.1495056                           |
| 726831530.1                                | 345.3501587                            | 137.0603707                                    | 95.33805542                                 | -316.071106                            |
| 1056129103                                 | 334.2801514                            | 148.868999                                     | 176.3164581                                 | -380.2156982                           |
| 1268842620                                 | 351.0600281                            | 135.9672218                                    | 83.2218338                                  | -393.8313599                           |
| 1169602364                                 | 346.0568237                            | 116.73255                                      | 97.74995117                                 | -309.7597351                           |
| 2532108057                                 | 515.1109619                            | 125.756919                                     | 191.1124222                                 | -318.71521                             |
| 1145772598                                 | 404.5005493                            | 144.4769764                                    | 167.084082                                  | -369.3640442                           |
| 54770934.38                                | 312.6590881                            | 139.6614425                                    | 231.0895874                                 | -245.9579163                           |
| 180265628.2                                | 244.6188049                            | 141.8095697                                    | 116.6216873                                 | -445.528656                            |
| 1167445770                                 | 355.286377                             | 146.3055467                                    | 150.1733704                                 | -386.427948                            |
| 1507309393                                 | 501.7914429                            | 139.2268755                                    | 155.0827194                                 | -317.2812805                           |
| 1129766999                                 | 323.8504028                            | 111.6943052                                    | 135.7934265                                 | -277.3063354                           |
| 356135134.9                                | 365.6124268                            | 125.6846647                                    | 143.4983398                                 | -395.8618164                           |
| 599194882.1                                | 374.8088379                            | 145.4502331                                    | 133.0800781                                 | -362.9453735                           |
| 579026443.9                                | 506.2559509                            | 120.619792                                     | 131.2285858                                 | -396.9732056                           |
| 723417428.1                                | 396.5288696                            | 167.6741646                                    | 172.0909058                                 | -418.7731628                           |
| 981446150.1                                | 304.1697388                            | 148.7869288                                    | 126.0430305                                 | -387.959259                            |
| 760306062.4                                | 407.1051331                            | 165.7488073                                    | 194.5319641                                 | -408.2222595                           |
| 883218424.8                                | 366.0924377                            | 131.9788635                                    | 162.9412247                                 | -329.6226196                           |
| 605553856.4                                | 329.6971741                            | 100.3314091                                    | 106.9962013                                 | -228.5857849                           |
| 1770618995                                 | 424.5612488                            | 123.9853156                                    | 171.3715897                                 | -334.1549683                           |
| 435939837                                  | 260.2061462                            | 166.4167818                                    | 80.72507629                                 | -396.3009033                           |
| 53372288.03                                | 255.74617                              | 121.4573019                                    | 156.3920609                                 | -311.9682922                           |
| 395924317.7                                | 450.0537109                            | 171.7694844                                    | 210.5000122                                 | -485.5483093                           |
| 1295702669                                 | 424.5169678                            | 118.3869731                                    | 137.8430649                                 | -315.9094238                           |
| 689184571.3                                | 158.1026154                            | 176.6843743                                    | 78.93819733                                 | -419.6582642                           |
| 1873543982                                 | 507.5281372                            | 134.7601685                                    | 157.8774414                                 | -368.8497925                           |
| 215156969.2                                | 319.7432861                            | 116.118679                                     | 146.898819                                  | -309.6540222                           |
| 1967332359                                 | 401.605835                             | 106.6898536                                    | 138.0619537                                 | -293.0955505                           |
| 639838106.7                                | 390.0300293                            | 164.1945475                                    | 148.6790009                                 | -444.7350769                           |
| 1510488957                                 | 365.3594971                            | 159.7193666                                    | 151.1952972                                 | -463.5101318                           |
| 764309350.2                                | 429.8476868                            | 147.9631068                                    | 143.8524231                                 | -521.9158325                           |
| 469706398.6                                | 310.0180773                            | 146.1905008                                    | 114.421508                                  | -365.5038452                           |
| 323445419                                  | 232.5446625                            | 116.6086228                                    | 109.5544815                                 | -300.6368103                           |
| 1355632360                                 | 447.9127502                            | 153.9301183                                    | 169.8474457                                 | -339.6643372                           |
| 3011059682                                 | 543.7527466                            | 142.6812107                                    | 182.414061                                  | -370.853241                            |
| 741705251.9                                | 418.5674744                            | 94.28759435                                    | 129.7465302                                 | -246.0350342                           |
| 720817198.7                                | 311.140564                             | 98.87120747                                    | 116.8800125                                 | -326.1083984                           |
| 134353628.2                                | 266.2333374                            | 151.4303585                                    | 123.144931                                  | -391.2666931                           |
| 772410771.5                                | 485.5157166                            | 135.7239688                                    | 216.2871155                                 | -289.2389832                           |
| 295480681.3                                | 336.7109985                            | 166.6612185                                    | 159.4176987                                 | -465.446991                            |
| 2075536549                                 | 441.4383545                            | 155.0643605                                    | 200.0981689                                 | -335.7905579                           |
| 421626586                                  | 233.1183472                            | 187.1176189                                    | 82.48269272                                 | -474.2964172                           |
| 955106836.6                                | 398.5303955                            | 132.628867                                     | 170.5162506                                 | -297.0776978                           |
| 1670011129                                 | 457.4165955                            | 142.6398944                                    | 177.0452179                                 | -340.9743652                           |
| 828054146.4                                | 350.7849426                            | 164.8164346                                    | 154.867926                                  | -394.2388                              |
| 1829013897                                 | 434.3682251                            | 114.4894234                                    | 138.4061661                                 | -284.9017029                           |
| 2083778872                                 | 376.1961975                            | 107.1984706                                    | 110.923912                                  | -371.4864197                           |
| 3016823786                                 | 470.1372986                            | 110.3244444                                    | 163.7415222                                 | -291.5515442                           |
| 898834080.6                                | 469.94104                              | 172.7133015                                    | 139.2035446                                 | -494.2493286                           |
| 684678745.9                                | 389.0614319                            | 150.6728332                                    | 97.2001358                                  | -377.5161133                           |
| 496557547.9                                | 319.8681335                            | 173.635289                                     | 143.4511551                                 | -383.1359253                           |
| 1298497819                                 | 324.3112183                            | 165.1161067                                    | 109.1669235                                 | -406.3411255                           |
| 1238545167                                 | 348.3460083                            | 126.9569834                                    | 117.2905731                                 | -424.8715515                           |
| 742576267.8                                | 307.8728027                            | 233.6002926                                    | 83.40577164                                 | -553.8774414                           |
| 796009095                                  | 416.0766907                            | 148.2732285                                    | 149.5569153                                 | -410.1163635                           |
| 1442424493                                 | 487.4134827                            | 138.326999                                     | 200.3716354                                 | -383.7950439                           |
| 39324145.75                                | 231.1104431                            | 100.2221616                                    | 143.4076874                                 | -267.7762146                           |
| 1289010924                                 | 422.3180542                            | 118.6540378                                    | 169.939682                                  | -273.1745911                           |
| 1602821131                                 | 374.4926453                            | 104.1187458                                    | 142.1802597                                 | -309.8453064                           |
| 594309461.1                                | 411.2622681                            | 168.2033501                                    | 165.2761353                                 | -373.6722717                           |
| 1418837955                                 | 319.8850708                            | 184.0088276                                    | 146.0885406                                 | -621.4572144                           |
| 66451155.94                                | 194.0187836                            | 115.9695156                                    | 140.8541626                                 | -327.8419495                           |
| 44441995.73                                | 272.1745605                            | 125.2045885                                    | 124.3483459                                 | -293.0187378                           |
| 1878258007                                 | 456.9324341                            | 132.2900486                                    | 163.798761                                  | -410.7748108                           |
| 638795963.5                                | 420.2764587                            | 183.0614293                                    | 125.4931488                                 | -368.2608337                           |
| 350273002                                  | 240.0991364                            | 112.6668111                                    | 92.39241943                                 | -269.8834839                           |
| 1500895070                                 | 393.3476257                            | 116.5820344                                    | 112.3292999                                 | -328.0271301                           |
| 1937311562                                 | 373.8443909                            | 111.1678835                                    | 133.0051041                                 | -259.4368591                           |
| 336565442.2                                | 314.3788452                            | 221.9691496                                    | 166.691153                                  | -555.0003052                           |
| 598642508.6                                | 344.1383667                            | 130.0315045                                    | 190.8487549                                 | -389.6210632                           |
| 48321268.16                                | 255.3091431                            | 125.6242772                                    | 177.1077789                                 | -224.5022125                           |
| 133054689.5                                | 275.4507446                            | 114.0285511                                    | 157.1112                                    | -299.3151855                           |
| 573334411.8                                | 454.7907715                            | 162.2128875                                    | 135.6687103                                 | -422.8779907                           |

| log.sigma.4.5.mm.3D_firstorder_Entropy | log.sigma.4.5.mm.3D_firstorder_StandardDeviation | log.sigma.4.5.mm.3D_firstorder_Range | log.sigma.4.5.mm.3D_firstorder_Variance | log.sigma.4.5.mm.3D_firstorder_10Percentile |
|----------------------------------------|--------------------------------------------------|--------------------------------------|-----------------------------------------|---------------------------------------------|
| 4.682330173                            | 160.4685494                                      | 818.1650696                          | 25750.15535                             | -243.0813446                                |
| 4.225178672                            | 117.4464309                                      | 727.8833618                          | 13793.66414                             | -175.4404877                                |
| 4.159952888                            | 113.9111481                                      | 567.9778748                          | 12975.74966                             | -219.0873795                                |
| 4.487946751                            | 137.2799635                                      | 864.829071                           | 18845.78837                             | -167.3159332                                |
| 4.674088502                            | 169.8016138                                      | 759.3043823                          | 28832.58805                             | -251.6195404                                |
| 4.209446937                            | 118.6169077                                      | 562.4828491                          | 14069.97079                             | -267.834906                                 |
| 3.907762282                            | 96.82162142                                      | 449.3561707                          | 9374.426375                             | -108.7927155                                |
| 4.801582709                            | 176.5857905                                      | 874.7651062                          | 31182.54142                             | -273.6385284                                |
| 4.701725669                            | 159.7372919                                      | 890.2654419                          | 25516.00244                             | -244.2001678                                |
| 4.238652528                            | 117.7255059                                      | 734.2603149                          | 13859.29474                             | -176.5909698                                |
| 4.321055026                            | 131.055268                                       | 639.0777283                          | 17175.48326                             | -255.2499969                                |
| 4.456094239                            | 136.9124224                                      | 763.0306702                          | 18745.01141                             | -208.4470306                                |
| 4.365600008                            | 131.8050512                                      | 636.9872742                          | 17372.57151                             | -163.6532974                                |
| 4.381355973                            | 131.6925124                                      | 665.5492859                          | 17342.91783                             | -189.7558105                                |
| 4.385461307                            | 129.5836202                                      | 714.1513977                          | 16791.91462                             | -136.0531464                                |
| 3.661684125                            | 87.95518275                                      | 777.3711548                          | 7736.114172                             | -96.3056076                                 |
| 4.519633664                            | 145.7478683                                      | 729.0514526                          | 21242.44111                             | -273.5353149                                |
| 4.563173044                            | 149.2527845                                      | 769.2368774                          | 22276.39369                             | -195.7890579                                |
| 4.648461047                            | 166.1174526                                      | 827.1354065                          | 27595.00805                             | -242.8826263                                |
| 4.011940608                            | 101.4119095                                      | 601.0356445                          | 10284.3754                              | -151.5876617                                |
| 3.909568843                            | 92.11315741                                      | 736.4237671                          | 8484.833768                             | -162.2684845                                |
| 4.377919631                            | 130.0241369                                      | 796.9177551                          | 16906.27618                             | -170.4654037                                |
| 4.226622099                            | 116.3755682                                      | 770.2526245                          | 13543.27288                             | -164.1645813                                |
| 4.449485182                            | 140.2938617                                      | 669.5716553                          | 19682.36763                             | -182.3777008                                |
| 3.929703576                            | 94.95127816                                      | 510.1281738                          | 9015.745223                             | -191.0453506                                |
| 4.525120097                            | 143.6045664                                      | 767.0403442                          | 20622.27148                             | -229.3840607                                |
| 3.878287944                            | 94.82711515                                      | 723.3319397                          | 8992.181768                             | -124.4189682                                |
| 4.237034977                            | 118.3831542                                      | 661.4212646                          | 14014.5712                              | -218.7850067                                |
| 4.529587061                            | 148.5924945                                      | 714.4958496                          | 22079.72943                             | -215.1304413                                |
| 4.263839243                            | 118.7820262                                      | 744.8913879                          | 14109.16976                             | -218.1535889                                |
| 4.098042444                            | 106.8113432                                      | 655.8165588                          | 11408.66303                             | -172.5433014                                |
| 4.322164353                            | 124.713558                                       | 833.8261719                          | 15553.47156                             | -134.6975357                                |
| 4.541732606                            | 144.1480572                                      | 773.8645935                          | 20778.66238                             | -201.353067                                 |
| 4.315927254                            | 132.4629805                                      | 558.6170044                          | 17546.44121                             | -127.9501518                                |
| 4.395225127                            | 136.3715262                                      | 690.1474609                          | 18597.19316                             | -231.375556                                 |
| 4.491525085                            | 143.2432115                                      | 741.714325                           | 20518.61763                             | -228.9872925                                |
| 4.395523983                            | 135.4501704                                      | 819.0727234                          | 18346.74866                             | -193.7129822                                |
| 4.156508033                            | 111.5893979                                      | 601.1567383                          | 12452.19373                             | -162.5396454                                |
| 4.251155537                            | 125.658601                                       | 761.4742432                          | 15790.08399                             | -179.1667328                                |
| 4.465726074                            | 139.5697509                                      | 737.7542114                          | 19479.71537                             | -246.6485168                                |
| 4.248067981                            | 117.5051415                                      | 903.2291565                          | 13807.45828                             | -174.7649506                                |
| 4.687528139                            | 164.0966375                                      | 815.3020325                          | 26927.70644                             | -270.6126526                                |
| 4.46134998                             | 141.2833545                                      | 692.1289978                          | 19960.98626                             | -250.096344                                 |
| 4.718840258                            | 164.5517252                                      | 815.3273926                          | 27077.27025                             | -252.8640228                                |
| 4.402469711                            | 131.3952723                                      | 695.7150574                          | 17264.71757                             | -179.2101303                                |
| 3.860074989                            | 94.83275499                                      | 558.282959                           | 8993.251418                             | -140.6105957                                |
| 4.344147854                            | 123.7894616                                      | 758.716217                           | 15323.8308                              | -155.4407883                                |
| 4.437557709                            | 141.1162487                                      | 656.5070496                          | 19913.79565                             | -286.9378891                                |
| 4.227647843                            | 121.3528891                                      | 567.7144623                          | 14726.52369                             | -154.7792511                                |
| 4.667002196                            | 171.7395093                                      | 935.6020203                          | 29494.45906                             | -257.3227844                                |
| 4.245999682                            | 117.6683331                                      | 740.4263916                          | 13845.83662                             | -162.2624054                                |
| 4.352481337                            | 144.8172044                                      | 876.3792927                          | 20972.02269                             | -310.7076599                                |
| 4.434811507                            | 133.7492296                                      | 876.3792927                          | 17888.85643                             | -186.4681854                                |
| 4.2048912                              | 116.1162304                                      | 629.3973083                          | 13482.97896                             | -157.060791                                 |
| 3.954730863                            | 105.6079438                                      | 694.7013855                          | 11153.03778                             | -141.342923                                 |
| 4.623912745                            | 155.5864392                                      | 834.7651062                          | 24207.14006                             | -269.4139404                                |
| 4.615723978                            | 152.4805466                                      | 828.8696289                          | 23250.31709                             | -251.9302094                                |
| 4.51480132                             | 146.64576                                        | 951.7635193                          | 21504.97894                             | -225.4432617                                |
| 4.391341767                            | 131.4364926                                      | 675.5225525                          | 17275.5516                              | -234.3006577                                |
| 4.164592118                            | 111.6386921                                      | 533.1814728                          | 12463.19758                             | -192.9453278                                |
| 4.528530179                            | 149.5996681                                      | 787.5770874                          | 22368.09433                             | -220.254834                                 |
| 4.533142041                            | 142.6198842                                      | 914.6059875                          | 20340.43136                             | -178.836821                                 |
| 3.890023897                            | 93.50874017                                      | 664.6025085                          | 8743.884487                             | -110.1330795                                |
| 3.914678366                            | 96.33781278                                      | 637.2489624                          | 9280.97417                              | -135.5299377                                |
| 4.43343106                             | 140.3285647                                      | 657.5000305                          | 19692.10608                             | -246.3723267                                |
| 4.386380546                            | 131.5024913                                      | 774.7546997                          | 17292.90522                             | -125.6309509                                |
| 4.615931476                            | 161.9603833                                      | 802.1579895                          | 26231.16575                             | -267.565161                                 |
| 4.610795188                            | 155.0172555                                      | 777.2289124                          | 24030.34951                             | -214.3526154                                |
| 4.534954188                            | 156.9435107                                      | 707.4147644                          | 24631.26556                             | -335.4229431                                |
| 4.393170557                            | 131.685333                                       | 695.6080933                          | 17341.02693                             | -176.6282959                                |
| 4.48346246                             | 141.2327859                                      | 798.3909607                          | 19946.69983                             | -192.1226944                                |
| 4.63752636                             | 157.3235746                                      | 745.0237427                          | 24750.70711                             | -262.5847046                                |
| 4.178591849                            | 113.2472465                                      | 719.269928                           | 12824.93885                             | -159.3618561                                |
| 4.045960572                            | 102.63335                                        | 747.6826172                          | 10533.60454                             | -160.6045227                                |
| 4.063570931                            | 109.1537119                                      | 761.6888428                          | 11914.53282                             | -115.970343                                 |
| 4.704809853                            | 163.8622929                                      | 964.1903687                          | 26850.85103                             | -278.9832306                                |
| 4.384183495                            | 132.3403647                                      | 766.5775452                          | 17513.97212                             | -251.973999                                 |
| 4.642276355                            | 159.6164073                                      | 703.0040588                          | 25477.39748                             | -283.4777191                                |
| 4.479238745                            | 140.7609298                                      | 730.6523438                          | 19813.63935                             | -263.8491241                                |
| 4.258379298                            | 118.334412                                       | 773.2175598                          | 14003.03306                             | -191.6370316                                |
| 4.836213731                            | 184.5612844                                      | 861.7502441                          | 34062.86771                             | -404.3270477                                |
| 4.507611488                            | 144.5491752                                      | 826.1930542                          | 20894.46404                             | -234.0008545                                |
| 4.449788577                            | 136.3657137                                      | 871.2085266                          | 18595.60786                             | -151.6602173                                |
| 3.892811944                            | 98.1007727                                       | 498.8866577                          | 9623.761603                             | -113.5104858                                |
| 4.243886295                            | 118.5703372                                      | 695.4926453                          | 14058.92487                             | -140.9528656                                |
| 4.039198217                            | 103.9466484                                      | 684.3379517                          | 10804.90572                             | -124.848587                                 |
| 4.642750134                            | 160.2706613                                      | 784.9345398                          | 25686.68487                             | -264.8855591                                |
| 4.745692483                            | 174.7561258                                      | 941.3422852                          | 30539.70352                             | -320.049704                                 |
| 4.049659896                            | 115.0822176                                      | 521.860733                           | 13243.9168                              | -143.6035614                                |
| 4.038552745                            | 120.8672201                                      | 565.1932983                          | 14608.8849                              | -191.3670166                                |
| 4.407486633                            | 131.8805306                                      | 867.7072449                          | 17392.47436                             | -177.8101288                                |
| 4.597527917                            | 157.9614789                                      | 788.5372925                          | 24951.82882                             | -297.3891144                                |
| 4.018803435                            | 102.1452105                                      | 509.9826202                          | 10433.64403                             | -180.6438431                                |
| 4.189251948                            | 112.7948386                                      | 721.3747559                          | 12722.67561                             | -169.0946747                                |
| 4.136039596                            | 110.603576                                       | 633.28125                            | 12233.15103                             | -157.5390244                                |
| 4.830415307                            | 204.2194587                                      | 869.3791504                          | 41705.58733                             | -385.3869141                                |
| 4.433832339                            | 134.9179371                                      | 733.7594299                          | 18202.84976                             | -168.5686874                                |
| 4.138506142                            | 119.6851022                                      | 479.8113556                          | 14324.5237                              | -147.1790161                                |
| 4.136966886                            | 112.5071362                                      | 574.7659302                          | 12657.85569                             | -147.0326019                                |
| 4.595585587                            | 152.6280874                                      | 877.6687622                          | 23295.33305                             | -259.8250061                                |

| log.sigma.4.5.mm.3D_firstorder_Kurtosis | log.sigma.4.5.mm.3D_firstorder_Mean | log.sigma.4.5.mm.3D_glrIm_ShortRunLowGrayLevelEmphasis | log.sigma.4.5.mm.3D_glrIm_GrayLevelVariance |
|-----------------------------------------|-------------------------------------|--------------------------------------------------------|---------------------------------------------|
| 2.720991646                             | -29.28037692                        | 0.009428952                                            | 42.1759489                                  |
| 3.427883571                             | -23.87996932                        | 0.013761986                                            | 23.22889771                                 |
| 2.345341264                             | -77.45321621                        | 0.019268076                                            | 20.75715864                                 |
| 2.614969933                             | 19.17876081                         | 0.004058361                                            | 30.66640683                                 |
| 2.426608463                             | -16.60884724                        | 0.008748677                                            | 46.08682548                                 |
| 2.306546843                             | -92.34582809                        | 0.02083457                                             | 22.60231866                                 |
| 2.638077743                             | 14.50267551                         | 0.031343959                                            | 15.38389693                                 |
| 2.393316184                             | -29.04803509                        | 0.009458121                                            | 49.85355876                                 |
| 2.663185117                             | -32.97393326                        | 0.006159915                                            | 41.36116585                                 |
| 2.959819764                             | -35.76969827                        | 0.00731695                                             | 22.74057803                                 |
| 2.243119846                             | -60.68215565                        | 0.012435493                                            | 27.40270676                                 |
| 2.762117363                             | -34.6088712                         | 0.013658662                                            | 30.32036676                                 |
| 2.608384791                             | 4.036607988                         | 0.017998442                                            | 27.92021751                                 |
| 2.344008397                             | -5.819624932                        | 0.008797992                                            | 27.84624832                                 |
| 3.040417645                             | 32.2241502                          | 0.011108838                                            | 27.50709125                                 |
| 5.292382277                             | 7.651279512                         | 0.00572983                                             | 14.50501866                                 |
| 2.568993095                             | -64.19326464                        | 0.019232185                                            | 33.95090052                                 |
| 2.682386412                             | -16.80202652                        | 0.019820072                                            | 35.94144228                                 |
| 2.802417594                             | 10.01877193                         | 0.008614869                                            | 44.39533522                                 |
| 3.249860199                             | -17.6540376                         | 0.014772136                                            | 17.25831775                                 |
| 3.395039702                             | -51.16432724                        | 0.007190975                                            | 14.33084565                                 |
| 3.004770399                             | -0.312136818                        | 0.01505954                                             | 27.10743697                                 |
| 3.275519879                             | -30.29154682                        | 0.00794666                                             | 22.24895813                                 |
| 2.43351672                              | 17.89956256                         | 0.012836847                                            | 31.69702275                                 |
| 2.702618448                             | -68.76265683                        | 0.034353119                                            | 14.60381496                                 |
| 2.648215927                             | -51.2181283                         | 0.012016611                                            | 33.44430548                                 |
| 4.049033554                             | -13.95285125                        | 0.007056318                                            | 16.19570673                                 |
| 2.755755989                             | -69.07223771                        | 0.021275745                                            | 22.56418806                                 |
| 2.063324206                             | -9.069147486                        | 0.008209657                                            | 35.24879232                                 |
| 3.22676766                              | -66.16581938                        | 0.010444044                                            | 23.96368424                                 |
| 3.160826847                             | -47.09379141                        | 0.011924975                                            | 18.63296144                                 |
| 2.973867089                             | 16.16573901                         | 0.008929419                                            | 25.75858696                                 |
| 2.524961767                             | -9.743425449                        | 0.011042628                                            | 33.70363011                                 |
| 2.111824125                             | 44.25920578                         | 0.025524322                                            | 28.15193482                                 |
| 2.848221469                             | -38.89422704                        | 0.009668305                                            | 29.93120881                                 |
| 2.183949943                             | -29.77743028                        | 0.009546691                                            | 32.92829953                                 |
| 2.813751236                             | -32.20829385                        | 0.013285172                                            | 29.71489712                                 |
| 2.509111276                             | -4.839844284                        | 0.01144103                                             | 20.16089349                                 |
| 3.629320366                             | 2.559483337                         | 0.010522783                                            | 26.09331877                                 |
| 2.686710936                             | -40.93964985                        | 0.014530771                                            | 31.68437328                                 |
| 3.35734785                              | -27.23372812                        | 0.006652186                                            | 23.02238316                                 |
| 2.355849736                             | -34.45169127                        | 0.012212738                                            | 43.12192138                                 |
| 2.167963993                             | -46.65365937                        | 0.012082751                                            | 31.96580142                                 |
| 2.527902411                             | -19.88458847                        | 0.010703899                                            | 43.61416423                                 |
| 2.659884658                             | -12.39769451                        | 0.010572538                                            | 28.24233628                                 |
| 2.923366359                             | -32.75881921                        | 0.018158447                                            | 14.88061298                                 |
| 2.741481767                             | 6.966181162                         | 0.00760832                                             | 25.06928793                                 |
| 2.230838469                             | -88.20855747                        | 0.025958846                                            | 31.56155711                                 |
| 2.744705258                             | 5.035125679                         | 0.023882155                                            | 24.70766915                                 |
| 3.426876796                             | 3.208849273                         | 0.012924533                                            | 47.97024472                                 |
| 2.908459815                             | -13.02454516                        | 0.010246539                                            | 22.88197716                                 |
| 1.795561048                             | -99.46344401                        | 0.015111358                                            | 33.26356961                                 |
| 3.095711695                             | -16.47563645                        | 0.008210506                                            | 29.67179973                                 |
| 2.87954768                              | -0.75408652                         | 0.01603568                                             | 21.89335016                                 |
| 3.849958489                             | -4.160212612                        | 0.009998427                                            | 19.2663929                                  |
| 2.537771013                             | -52.46626891                        | 0.01106433                                             | 39.15552041                                 |
| 2.280900481                             | -47.53902601                        | 0.005663504                                            | 37.32338906                                 |
| 3.27918248                              | -19.70030572                        | 0.00449723                                             | 35.07805675                                 |
| 2.637391988                             | -64.00086649                        | 0.018234931                                            | 27.86688895                                 |
| 2.37578527                              | -33.68045907                        | 0.015882978                                            | 20.13986243                                 |
| 2.331815309                             | -36.4195963                         | 0.014799887                                            | 35.77691806                                 |
| 3.08429415                              | 4.182884121                         | 0.007808101                                            | 33.10281367                                 |
| 3.991794896                             | 12.09404651                         | 0.013453269                                            | 14.87320157                                 |
| 3.492594116                             | -22.23828896                        | 0.006859107                                            | 16.19544484                                 |
| 2.5302481                               | -56.91262952                        | 0.020550941                                            | 31.95087073                                 |
| 3.022356287                             | 33.58705856                         | 0.01076266                                             | 28.489004                                   |
| 2.894904988                             | -39.30389317                        | 0.014104541                                            | 42.4889112                                  |
| 2.510995696                             | -3.821831985                        | 0.011753139                                            | 38.870997                                   |
| 2.463140904                             | -101.8908129                        | 0.018566569                                            | 39.2835888                                  |
| 2.699720931                             | -15.79206829                        | 0.020095957                                            | 28.04333635                                 |
| 2.495697551                             | -19.98598656                        | 0.012225794                                            | 32.2692255                                  |
| 2.256901291                             | -49.12992984                        | 0.013796741                                            | 39.51915986                                 |
| 3.200740865                             | -16.81931078                        | 0.01225752                                             | 21.38623798                                 |
| 3.017887536                             | -30.95008176                        | 0.006509894                                            | 17.57494393                                 |
| 4.117914329                             | 16.0296668                          | 0.00868009                                             | 20.52867289                                 |
| 2.623058436                             | -54.58052304                        | 0.006934299                                            | 43.36256903                                 |
| 2.427909339                             | -72.03006689                        | 0.011307899                                            | 27.97076926                                 |
| 2.303001363                             | -68.35068481                        | 0.022117037                                            | 40.94074398                                 |
| 2.226864038                             | -86.31158297                        | 0.01130647                                             | 31.89329296                                 |
| 2.629215125                             | -45.98959188                        | 0.006482024                                            | 22.61010043                                 |
| 2.360827497                             | -143.1999615                        | 0.011632955                                            | 54.60562157                                 |
| 2.242515967                             | -33.02251117                        | 0.008723966                                            | 33.44490768                                 |
| 2.933869885                             | 23.21100587                         | 0.004896207                                            | 30.34455805                                 |
| 2.930481315                             | 20.51146191                         | 0.01872434                                             | 15.77876443                                 |
| 2.713346622                             | 4.455987204                         | 0.014672908                                            | 22.84210018                                 |
| 3.309683236                             | -5.983937403                        | 0.007802133                                            | 18.14672422                                 |
| 2.358896467                             | -51.04588258                        | 0.01998777                                             | 41.21217917                                 |
| 2.513155293                             | -57.61549371                        | 0.003672567                                            | 48.90686343                                 |
| 2.23849354                              | -14.3182312                         | 0.013481502                                            | 21.69621553                                 |
| 2.895890669                             | -32.66961994                        | 0.027362589                                            | 23.74880624                                 |
| 3.265023825                             | -10.40108617                        | 0.005350134                                            | 29.46780357                                 |
| 2.468631341                             | -92.51842029                        | 0.038417174                                            | 40.20429775                                 |
| 2.597105404                             | -47.54120622                        | 0.025131239                                            | 17.16770788                                 |
| 3.11068362                              | -29.47363435                        | 0.008788562                                            | 21.04869153                                 |
| 2.77055215                              | -11.18692514                        | 0.016770005                                            | 20.20416249                                 |
| 2.146769623                             | -86.97537601                        | 0.012559117                                            | 66.47487413                                 |
| 2.698472233                             | 5.536916395                         | 0.007039035                                            | 29.78191259                                 |
| 2.154098061                             | 15.02306735                         | 0.049880942                                            | 22.34170065                                 |
| 2.849362084                             | 18.56487998                         | 0.020088767                                            | 20.59310448                                 |
| 3.180624458                             | -54.93348541                        | 0.011189766                                            | 38.3982976                                  |

| log.sigma.4.5.mm.3D_glrIm_LowGrayLevelRunEmphasis | log.sigma.4.5.mm.3D_glrIm_GrayLevelNonUniformityNormalized | log.sigma.4.5.mm.3D_glrIm_RunVariance | log.sigma.4.5.mm.3D_glrIm_GrayLevelNonUniformity |
|---------------------------------------------------|------------------------------------------------------------|---------------------------------------|--------------------------------------------------|
| 0.009826008                                       | 0.04426841                                                 | 0.069649838                           | 29.43539418                                      |
| 0.014921631                                       | 0.061993972                                                | 0.205298261                           | 113.0847618                                      |
| 0.020552546                                       | 0.061325055                                                | 0.088358306                           | 24.73772997                                      |
| 0.004258634                                       | 0.049970845                                                | 0.106524204                           | 121.450982                                       |
| 0.009062357                                       | 0.043515201                                                | 0.076235892                           | 14.6876749                                       |
| 0.022191661                                       | 0.059961759                                                | 0.099331746                           | 35.73441055                                      |
| 0.034273617                                       | 0.076510621                                                | 0.131619483                           | 23.22181481                                      |
| 0.00858274                                        | 0.040050719                                                | 0.065538478                           | 37.96430143                                      |
| 0.006493635                                       | 0.043498319                                                | 0.086154057                           | 84.33337374                                      |
| 0.007909777                                       | 0.060479042                                                | 0.131545684                           | 169.4621343                                      |
| 0.012984355                                       | 0.055833083                                                | 0.087546658                           | 43.14408852                                      |
| 0.014678049                                       | 0.051214746                                                | 0.104876991                           | 69.81573731                                      |
| 0.019321631                                       | 0.053753215                                                | 0.138229469                           | 101.118229                                       |
| 0.009293609                                       | 0.053321624                                                | 0.094217032                           | 55.38986317                                      |
| 0.011735345                                       | 0.05524948                                                 | 0.10555919                            | 46.45920725                                      |
| 0.006545906                                       | 0.098349132                                                | 0.603460711                           | 536.7016747                                      |
| 0.020665533                                       | 0.049629033                                                | 0.070460997                           | 32.5936196                                       |
| 0.021555021                                       | 0.047186754                                                | 0.112873994                           | 101.3440869                                      |
| 0.008981291                                       | 0.046349186                                                | 0.073659493                           | 25.37634139                                      |
| 0.01611137                                        | 0.070606099                                                | 0.224084853                           | 173.6067037                                      |
| 0.007947773                                       | 0.07674999                                                 | 0.231830706                           | 346.2482806                                      |
| 0.016243315                                       | 0.054553062                                                | 0.1111111762                          | 86.40935898                                      |
| 0.008544965                                       | 0.063389537                                                | 0.119393932                           | 157.951208                                       |
| 0.013609714                                       | 0.050034599                                                | 0.08658751                            | 22.35959024                                      |
| 0.037410048                                       | 0.07352882                                                 | 0.133290109                           | 80.22917141                                      |
| 0.012665785                                       | 0.048791039                                                | 0.076393521                           | 31.70647249                                      |
| 0.007874123                                       | 0.078607978                                                | 0.412059897                           | 224.0258933                                      |
| 0.02317014                                        | 0.059790732                                                | 0.113283331                           | 78.59759401                                      |
| 0.008541874                                       | 0.046815177                                                | 0.071290955                           | 78.04976606                                      |
| 0.011321238                                       | 0.059741329                                                | 0.229772142                           | 132.1569795                                      |
| 0.012980708                                       | 0.067328492                                                | 0.139322007                           | 193.8008778                                      |
| 0.009753962                                       | 0.057130502                                                | 0.176258208                           | 302.8334773                                      |
| 0.011546036                                       | 0.047892214                                                | 0.101130142                           | 90.1772082                                       |
| 0.026029661                                       | 0.055111684                                                | 0.04150602                            | 5.511593312                                      |
| 0.010029597                                       | 0.05492802                                                 | 0.067119602                           | 17.13360779                                      |
| 0.009990074                                       | 0.048677525                                                | 0.094032117                           | 91.52299376                                      |
| 0.014376249                                       | 0.053180918                                                | 0.119286671                           | 140.2912737                                      |
| 0.012457922                                       | 0.062438769                                                | 0.169817296                           | 186.4502945                                      |
| 0.011097391                                       | 0.064423508                                                | 0.151490705                           | 48.44196134                                      |
| 0.015338383                                       | 0.051384669                                                | 0.093896077                           | 50.18472567                                      |
| 0.007156713                                       | 0.061286354                                                | 0.151601883                           | 80.70184107                                      |
| 0.013086656                                       | 0.043500862                                                | 0.070857488                           | 39.13812591                                      |
| 0.012624996                                       | 0.04971237                                                 | 0.082173297                           | 76.52146585                                      |
| 0.011220718                                       | 0.043002017                                                | 0.075638647                           | 41.40614274                                      |
| 0.011160085                                       | 0.053081302                                                | 0.118711678                           | 91.31553535                                      |
| 0.020456396                                       | 0.077636                                                   | 0.185667752                           | 152.1830323                                      |
| 0.008117258                                       | 0.055569599                                                | 0.125698565                           | 215.7852771                                      |
| 0.027857304                                       | 0.050744748                                                | 0.076178066                           | 27.8052214                                       |
| 0.024826056                                       | 0.061019864                                                | 0.064139383                           | 7.676643628                                      |
| 0.013845753                                       | 0.049924685                                                | 0.067027542                           | 23.4087005                                       |
| 0.011052387                                       | 0.059330704                                                | 0.162804911                           | 182.4034371                                      |
| 0.01579221                                        | 0.051941379                                                | 0.078726719                           | 40.38814676                                      |
| 0.008719416                                       | 0.052571615                                                | 0.135413355                           | 182.8004904                                      |
| 0.017168958                                       | 0.062461337                                                | 0.109025519                           | 33.83678024                                      |
| 0.011081833                                       | 0.080101982                                                | 0.313320364                           | 445.5790308                                      |
| 0.011480329                                       | 0.045533545                                                | 0.069857992                           | 37.7749201                                       |
| 0.005936281                                       | 0.04455486                                                 | 0.074080626                           | 91.88053233                                      |
| 0.004669611                                       | 0.053474087                                                | 0.094862048                           | 64.17003839                                      |
| 0.019713975                                       | 0.054120215                                                | 0.10611095                            | 40.46554632                                      |
| 0.016925286                                       | 0.061754375                                                | 0.113685211                           | 50.26317052                                      |
| 0.015774352                                       | 0.047404772                                                | 0.094453094                           | 93.40180346                                      |
| 0.008273308                                       | 0.0495276                                                  | 0.124391337                           | 247.8942565                                      |
| 0.014591702                                       | 0.079768513                                                | 0.223696739                           | 216.0570055                                      |
| 0.007588283                                       | 0.07657857                                                 | 0.294063086                           | 177.4801253                                      |
| 0.021433476                                       | 0.051878618                                                | 0.056394604                           | 10.663399                                        |
| 0.01129901                                        | 0.054774149                                                | 0.11298285                            | 78.15263557                                      |
| 0.014856114                                       | 0.048124698                                                | 0.075990523                           | 17.90276765                                      |
| 0.012519654                                       | 0.045159235                                                | 0.104601441                           | 133.6706897                                      |
| 0.019420088                                       | 0.049871541                                                | 0.059880125                           | 21.1321112                                       |
| 0.021458717                                       | 0.053270839                                                | 0.095394948                           | 99.21160832                                      |
| 0.013103149                                       | 0.049839606                                                | 0.113615831                           | 139.198222                                       |
| 0.014567126                                       | 0.043888285                                                | 0.073842734                           | 46.61224487                                      |
| 0.013279148                                       | 0.06304491                                                 | 0.179376121                           | 291.0513272                                      |
| 0.007197888                                       | 0.068143443                                                | 0.235534061                           | 398.6977506                                      |
| 0.009440824                                       | 0.072742743                                                | 0.256973622                           | 575.1303859                                      |
| 0.007203471                                       | 0.043284515                                                | 0.074574155                           | 45.53225819                                      |
| 0.011971782                                       | 0.052595196                                                | 0.096159091                           | 54.63430527                                      |
| 0.023128                                          | 0.043738409                                                | 0.060646575                           | 25.31494454                                      |
| 0.01200201                                        | 0.04875617                                                 | 0.09090417                            | 80.00842431                                      |
| 0.006950026                                       | 0.058699665                                                | 0.103615844                           | 153.5097112                                      |
| 0.012114712                                       | 0.038788843                                                | 0.054897037                           | 18.67316194                                      |
| 0.009053488                                       | 0.047947683                                                | 0.068369328                           | 60.5506793                                       |
| 0.005170282                                       | 0.052838874                                                | 0.117007825                           | 135.3414197                                      |
| 0.019202051                                       | 0.081344977                                                | 0.070182089                           | 11.04592009                                      |
| 0.01570849                                        | 0.058948966                                                | 0.125499128                           | 183.019894                                       |
| 0.008566957                                       | 0.070804902                                                | 0.214941953                           | 338.1814339                                      |
| 0.021665208                                       | 0.043649834                                                | 0.072993206                           | 31.95763426                                      |
| 0.003799153                                       | 0.042192452                                                | 0.063310185                           | 62.11465714                                      |
| 0.013889377                                       | 0.065753516                                                | 0.090513045                           | 11.1421544                                       |
| 0.028659272                                       | 0.073286888                                                | 0.07225818                            | 7.232779683                                      |
| 0.005734857                                       | 0.054880271                                                | 0.197064672                           | 194.268014                                       |
| 0.042653335                                       | 0.044562289                                                | 0.067176509                           | 29.74667674                                      |
| 0.027445392                                       | 0.067583627                                                | 0.175549046                           | 61.18585422                                      |
| 0.009429091                                       | 0.062640898                                                | 0.164842079                           | 229.9167681                                      |
| 0.018283706                                       | 0.063377641                                                | 0.208506775                           | 324.6024443                                      |
| 0.012844964                                       | 0.040010994                                                | 0.045643543                           | 9.732452878                                      |
| 0.007348102                                       | 0.052144095                                                | 0.112285911                           | 58.30791531                                      |
| 0.053669374                                       | 0.061761008                                                | 0.054665154                           | 7.219125002                                      |
| 0.021791241                                       | 0.064633566                                                | 0.108250893                           | 22.36336639                                      |
| 0.011902648                                       | 0.04757138                                                 | 0.118401553                           | 35.10232612                                      |

| log.sigma.4.5.mm.3D_glrlm_LongRunEmphasis | log.sigma.4.5.mm.3D_glrlm_ShortRunHighGrayLevelEmphasis | log.sigma.4.5.mm.3D_glrlm_RunLengthNonUniformity | log.sigma.4.5.mm.3D_glrlm_ShortRunEmphasis |
|-------------------------------------------|---------------------------------------------------------|--------------------------------------------------|--------------------------------------------|
| 1.198210173                               | 300.0701931                                             | 593.928254                                       | 0.956671861                                |
| 1.506169681                               | 168.8453844                                             | 1465.571155                                      | 0.914838645                                |
| 1.252563386                               | 147.3807611                                             | 352.1462881                                      | 0.946321006                                |
| 1.285525214                               | 378.5470919                                             | 2101.117189                                      | 0.943443397                                |
| 1.211184139                               | 383.680433                                              | 301.2986073                                      | 0.955855342                                |
| 1.26552705                                | 155.470529                                              | 519.336589                                       | 0.946974896                                |
| 1.375133135                               | 93.37408939                                             | 250.4639587                                      | 0.923755461                                |
| 1.183590205                               | 339.5850064                                             | 854.6691767                                      | 0.960345793                                |
| 1.237273168                               | 357.6872807                                             | 1703.680613                                      | 0.950452979                                |
| 1.356068651                               | 211.7115741                                             | 2336.301044                                      | 0.929880863                                |
| 1.237376252                               | 214.4563831                                             | 683.5712607                                      | 0.951945396                                |
| 1.291264167                               | 195.0119625                                             | 1169.20575                                       | 0.940097692                                |
| 1.358427349                               | 154.6475306                                             | 1588.07395                                       | 0.933793192                                |
| 1.254464252                               | 248.1833566                                             | 908.7696391                                      | 0.948485564                                |
| 1.283880837                               | 209.1603636                                             | 727.9654637                                      | 0.943655392                                |
| 2.259115871                               | 204.279461                                              | 3771.735033                                      | 0.854705019                                |
| 1.204975183                               | 248.5646341                                             | 585.7539031                                      | 0.954985342                                |
| 1.294199489                               | 195.9655825                                             | 1858.710962                                      | 0.943948483                                |
| 1.205456382                               | 422.4027495                                             | 488.3576519                                      | 0.955999961                                |
| 1.52973343                                | 126.0488669                                             | 1984.908279                                      | 0.916120298                                |
| 1.579910846                               | 180.9726085                                             | 3510.991338                                      | 0.902333612                                |
| 1.296558908                               | 176.1683111                                             | 1365.327907                                      | 0.941923099                                |
| 1.324074203                               | 216.7511453                                             | 2108.380166                                      | 0.93517268                                 |
| 1.247682647                               | 276.6025948                                             | 389.2082516                                      | 0.946498578                                |
| 1.355346728                               | 88.04358732                                             | 915.4368091                                      | 0.931584642                                |
| 1.218465925                               | 236.5495085                                             | 574.4165894                                      | 0.952448937                                |
| 1.902997728                               | 190.5951942                                             | 2097.225992                                      | 0.88023067                                 |
| 1.306149523                               | 134.6263286                                             | 1125.421325                                      | 0.939468359                                |
| 1.19550003                                | 283.4699335                                             | 1502.501439                                      | 0.959340125                                |
| 1.556363397                               | 197.0850993                                             | 1753.487337                                      | 0.909477321                                |
| 1.364631351                               | 148.5818407                                             | 2413.034227                                      | 0.931242404                                |
| 1.433490032                               | 214.809256                                              | 4380.589213                                      | 0.925536701                                |
| 1.269012943                               | 249.0692013                                             | 1641.623683                                      | 0.946909856                                |
| 1.125123535                               | 174.7197656                                             | 92.69938555                                      | 0.970490945                                |
| 1.202185988                               | 301.4537389                                             | 276.4712818                                      | 0.953359246                                |
| 1.250297059                               | 254.1778857                                             | 1652.817687                                      | 0.950176391                                |
| 1.315436462                               | 173.7620232                                             | 2256.46077                                       | 0.93920475                                 |
| 1.436994451                               | 158.8267989                                             | 2440.259849                                      | 0.921192772                                |
| 1.395469076                               | 278.2658882                                             | 627.7644355                                      | 0.928281197                                |
| 1.249930695                               | 215.558352                                              | 857.7156112                                      | 0.949919464                                |
| 1.409807508                               | 244.7969414                                             | 1074.932827                                      | 0.921128766                                |
| 1.193781841                               | 293.6165996                                             | 808.9740515                                      | 0.959149675                                |
| 1.223346975                               | 235.6252896                                             | 1370.982392                                      | 0.954754363                                |
| 1.209655868                               | 309.3611963                                             | 857.5155304                                      | 0.955565146                                |
| 1.315579535                               | 213.4941428                                             | 1471.437271                                      | 0.939082936                                |
| 1.48650383                                | 96.95374093                                             | 1568.148787                                      | 0.912140152                                |
| 1.334993434                               | 229.423515                                              | 3273.814915                                      | 0.934205202                                |
| 1.210893853                               | 193.9041562                                             | 489.0237458                                      | 0.955791862                                |
| 1.200369948                               | 206.5344478                                             | 111.1709856                                      | 0.951970263                                |
| 1.191934078                               | 452.7017873                                             | 419.7776945                                      | 0.957587544                                |
| 1.406712478                               | 181.228483                                              | 2553.928353                                      | 0.927912816                                |
| 1.212594029                               | 207.7963478                                             | 696.4285986                                      | 0.957056411                                |
| 1.347557031                               | 238.2957149                                             | 2947.711556                                      | 0.935682117                                |
| 1.301385896                               | 193.3932294                                             | 461.0615856                                      | 0.938017753                                |
| 1.705918465                               | 158.61404                                               | 4304.499825                                      | 0.899309598                                |
| 1.195502856                               | 297.2559155                                             | 744.850127                                       | 0.958261314                                |
| 1.207802114                               | 336.3030418                                             | 1840.058298                                      | 0.955710699                                |
| 1.260160868                               | 437.8003237                                             | 1046.871782                                      | 0.946852053                                |
| 1.294510458                               | 189.073823                                              | 639.89659                                        | 0.939679081                                |
| 1.293561569                               | 160.4719323                                             | 709.4982983                                      | 0.945352525                                |
| 1.252157449                               | 201.5818709                                             | 1729.381934                                      | 0.949809335                                |
| 1.326008816                               | 262.7116979                                             | 4261.951563                                      | 0.937567508                                |
| 1.545275354                               | 126.0909471                                             | 2173.510872                                      | 0.912254514                                |
| 1.694100515                               | 184.0603835                                             | 1772.933786                                      | 0.89459133                                 |
| 1.172267626                               | 227.6947552                                             | 184.6714345                                      | 0.959049143                                |
| 1.303299378                               | 209.7663458                                             | 1223.461375                                      | 0.940257887                                |
| 1.201663858                               | 352.0680969                                             | 335.4779797                                      | 0.959618543                                |
| 1.273138324                               | 235.896506                                              | 2581.344258                                      | 0.94705169                                 |
| 1.169244897                               | 268.646952                                              | 384.6330216                                      | 0.962880039                                |
| 1.263617668                               | 163.6955127                                             | 1617.700621                                      | 0.945540091                                |
| 1.302344718                               | 213.1510437                                             | 2403.696043                                      | 0.941263474                                |
| 1.205307313                               | 244.4858172                                             | 948.3891299                                      | 0.956393681                                |
| 1.43951972                                | 153.2387937                                             | 3813.468004                                      | 0.925279862                                |
| 1.559420496                               | 207.0735474                                             | 4662.65125                                       | 0.91136688                                 |
| 1.614885169                               | 176.4374554                                             | 6159.635818                                      | 0.902548246                                |
| 1.202854649                               | 365.7834628                                             | 944.476793                                       | 0.958103228                                |
| 1.255306852                               | 206.1749664                                             | 912.1410199                                      | 0.949506856                                |
| 1.172663687                               | 224.6063183                                             | 524.3871944                                      | 0.96200133                                 |
| 1.25012254                                | 222.4657663                                             | 1437.867071                                      | 0.948383822                                |
| 1.290479159                               | 255.8887246                                             | 2235.545403                                      | 0.939393077                                |
| 1.153279218                               | 364.1724031                                             | 442.3095739                                      | 0.967012202                                |
| 1.197707573                               | 282.2334838                                             | 1126.756427                                      | 0.956069683                                |
| 1.309275335                               | 315.9865381                                             | 2197.907872                                      | 0.940359121                                |
| 1.214247204                               | 159.7707453                                             | 119.4518165                                      | 0.950040762                                |
| 1.322157921                               | 153.1924234                                             | 2663.153574                                      | 0.940101743                                |
| 1.535911151                               | 181.5366308                                             | 3783.944616                                      | 0.90897367                                 |
| 1.20448429                                | 217.3419955                                             | 653.9398352                                      | 0.956212169                                |
| 1.175954026                               | 566.2165042                                             | 1334.528146                                      | 0.96230073                                 |
| 1.263542542                               | 204.7719762                                             | 146.7202086                                      | 0.943072812                                |
| 1.210981013                               | 146.4527928                                             | 87.60186019                                      | 0.953526955                                |
| 1.465407816                               | 301.0137223                                             | 2915.367074                                      | 0.924267701                                |
| 1.187422512                               | 178.5515957                                             | 601.7824692                                      | 0.959982357                                |
| 1.455956272                               | 101.5257127                                             | 732.1129987                                      | 0.917069425                                |
| 1.412389763                               | 186.1798556                                             | 3045.008351                                      | 0.927143068                                |
| 1.498598471                               | 133.2021012                                             | 4155.612067                                      | 0.918542305                                |
| 1.12824929                                | 453.7960491                                             | 225.7783828                                      | 0.971554541                                |
| 1.297251824                               | 291.2420879                                             | 961.3716213                                      | 0.941636928                                |
| 1.163865788                               | 121.6265726                                             | 106.046034                                       | 0.962114556                                |
| 1.313354137                               | 181.8117169                                             | 292.2711553                                      | 0.933789961                                |
| 1.318844485                               | 263.2576942                                             | 627.6422262                                      | 0.936985892                                |

| log.sigma.4.5.mm.3D_glrIm_LongRunHighGrayLevelEmphasis | log.sigma.4.5.mm.3D_glrIm_RunPercentage | log.sigma.4.5.mm.3D_glrIm_LongRunLowGrayLevelEmphasis | log.sigma.4.5.mm.3D_glrIm_RunEntropy |
|--------------------------------------------------------|-----------------------------------------|-------------------------------------------------------|--------------------------------------|
| 363.0458531                                            | 0.941817389                             | 0.011555064                                           | 4.97726844                           |
| 262.3451575                                            | 0.878041554                             | 0.021047231                                           | 4.820832284                          |
| 182.15475                                              | 0.929280397                             | 0.02620094                                            | 4.496241074                          |
| 516.2366126                                            | 0.922288717                             | 0.005242491                                           | 4.897064511                          |
| 483.6531171                                            | 0.940004285                             | 0.010411117                                           | 4.941783501                          |
| 203.1542641                                            | 0.926785501                             | 0.028358807                                           | 4.564272672                          |
| 129.7056718                                            | 0.900251084                             | 0.047551273                                           | 4.35216099                           |
| 410.2887812                                            | 0.946031015                             | 0.011609545                                           | 5.081032728                          |
| 452.9265085                                            | 0.932511933                             | 0.00808714                                            | 5.061059898                          |
| 287.9369988                                            | 0.904404827                             | 0.010888856                                           | 4.731510074                          |
| 280.6534429                                            | 0.934424705                             | 0.015474059                                           | 4.653872571                          |
| 252.9207881                                            | 0.919755009                             | 0.019282427                                           | 4.861949265                          |
| 220.3917694                                            | 0.907091462                             | 0.026138181                                           | 4.824335872                          |
| 327.4045564                                            | 0.929062887                             | 0.011545607                                           | 4.741017318                          |
| 273.0637759                                            | 0.922992485                             | 0.01481555                                            | 4.768059859                          |
| 505.8611184                                            | 0.783415088                             | 0.013126574                                           | 4.695307869                          |
| 306.4618495                                            | 0.940819925                             | 0.027978656                                           | 4.811320321                          |
| 248.6846169                                            | 0.920932841                             | 0.030175303                                           | 4.962920598                          |
| 526.9656684                                            | 0.940655564                             | 0.010535858                                           | 4.933117814                          |
| 196.1174729                                            | 0.877406421                             | 0.02434764                                            | 4.607716103                          |
| 297.8941583                                            | 0.863411474                             | 0.012241301                                           | 4.580660994                          |
| 231.5184237                                            | 0.920751342                             | 0.021787966                                           | 4.778206933                          |
| 289.9471549                                            | 0.912289102                             | 0.011406962                                           | 4.685680593                          |
| 371.0473386                                            | 0.929154006                             | 0.016813884                                           | 4.786767502                          |
| 118.5627641                                            | 0.906273959                             | 0.052888541                                           | 4.393645575                          |
| 288.0271549                                            | 0.936377743                             | 0.015489833                                           | 4.843839657                          |
| 384.31958                                              | 0.821585512                             | 0.013526607                                           | 4.723369426                          |
| 172.100326                                             | 0.91733319                              | 0.033034866                                           | 4.651391689                          |
| 355.0787826                                            | 0.944563086                             | 0.010064921                                           | 4.8267129                            |
| 333.8626213                                            | 0.869999395                             | 0.015873571                                           | 4.890773777                          |
| 199.8059427                                            | 0.905316137                             | 0.01840244                                            | 4.579064687                          |
| 311.3332556                                            | 0.893708652                             | 0.014227562                                           | 4.859604022                          |
| 329.7681032                                            | 0.926141738                             | 0.014377582                                           | 4.929141268                          |
| 199.4269788                                            | 0.961538462                             | 0.02807573                                            | 4.445501354                          |
| 381.8625623                                            | 0.93952734                              | 0.011517098                                           | 4.678573172                          |
| 334.2178206                                            | 0.93073115                              | 0.012063919                                           | 4.853824389                          |
| 226.3468712                                            | 0.915811966                             | 0.019801517                                           | 4.829241529                          |
| 244.478256                                             | 0.890234393                             | 0.017921179                                           | 4.69684614                           |
| 423.8832143                                            | 0.900046062                             | 0.013800637                                           | 4.73198048                           |
| 275.546974                                             | 0.930923224                             | 0.019164464                                           | 4.823855688                          |
| 357.1485655                                            | 0.893121804                             | 0.009697514                                           | 4.775940775                          |
| 358.7666941                                            | 0.944143999                             | 0.016895055                                           | 4.967373984                          |
| 300.899991                                             | 0.937365314                             | 0.015236195                                           | 4.790844919                          |
| 387.4179507                                            | 0.939437148                             | 0.013496127                                           | 5.025684234                          |
| 291.2475168                                            | 0.915867945                             | 0.014043833                                           | 4.834228673                          |
| 136.8316501                                            | 0.87960917                              | 0.032960795                                           | 4.444116902                          |
| 320.5473027                                            | 0.910202315                             | 0.010606875                                           | 4.813316607                          |
| 240.2337947                                            | 0.939833751                             | 0.036631429                                           | 4.725551367                          |
| 251.0260386                                            | 0.939150402                             | 0.028637771                                           | 4.477511053                          |
| 564.5299387                                            | 0.943352422                             | 0.017570609                                           | 4.954704889                          |
| 261.776989                                             | 0.89780284                              | 0.015186734                                           | 4.760342831                          |
| 262.0865098                                            | 0.94019161                              | 0.019124536                                           | 4.652971336                          |
| 327.3727158                                            | 0.909810158                             | 0.011325502                                           | 4.90545167                           |
| 261.8843236                                            | 0.916569049                             | 0.022031885                                           | 4.609545146                          |
| 279.9172607                                            | 0.851024187                             | 0.018014535                                           | 4.694803077                          |
| 363.4550203                                            | 0.943642251                             | 0.013333891                                           | 4.918875312                          |
| 413.3167854                                            | 0.940369708                             | 0.007199399                                           | 4.934623096                          |
| 586.883381                                             | 0.92789577                              | 0.005489626                                           | 4.893730493                          |
| 243.8461069                                            | 0.918446418                             | 0.0263037                                             | 4.789319941                          |
| 214.9410531                                            | 0.92403737                              | 0.022434054                                           | 4.526102733                          |
| 248.1232897                                            | 0.929792718                             | 0.020505372                                           | 4.898145447                          |
| 364.3102781                                            | 0.913584408                             | 0.010574849                                           | 4.985302085                          |
| 201.9018006                                            | 0.875354742                             | 0.021314188                                           | 4.50937387                           |
| 332.9163719                                            | 0.84821001                              | 0.012095579                                           | 4.632471816                          |
| 271.2161984                                            | 0.94718185                              | 0.025014965                                           | 4.661301261                          |
| 280.6779814                                            | 0.918420922                             | 0.013888524                                           | 4.812648974                          |
| 432.9644524                                            | 0.9439672                               | 0.017979693                                           | 4.881768022                          |
| 303.740467                                             | 0.925819879                             | 0.016261649                                           | 4.999650006                          |
| 322.2455009                                            | 0.949982753                             | 0.022904923                                           | 4.778753027                          |
| 207.7705505                                            | 0.926060513                             | 0.027574407                                           | 4.78395616                           |
| 275.8338108                                            | 0.918775304                             | 0.017415514                                           | 4.901848081                          |
| 297.1055488                                            | 0.940723581                             | 0.018033979                                           | 4.941088098                          |
| 223.0199674                                            | 0.892965587                             | 0.01907443                                            | 4.72111971                           |
| 333.3277596                                            | 0.871031292                             | 0.011338383                                           | 4.666749044                          |
| 302.1062256                                            | 0.860566449                             | 0.014027511                                           | 4.76624092                           |
| 452.19048                                              | 0.942514475                             | 0.008426107                                           | 5.001335074                          |
| 262.7827169                                            | 0.929963501                             | 0.015219226                                           | 4.736840314                          |
| 266.4334216                                            | 0.948928121                             | 0.028270775                                           | 4.892022988                          |
| 280.2881289                                            | 0.930315716                             | 0.01514889                                            | 4.839172929                          |
| 339.0033386                                            | 0.918941564                             | 0.009100713                                           | 4.682452303                          |
| 422.6931175                                            | 0.955128205                             | 0.014238856                                           | 5.044610833                          |
| 353.6211979                                            | 0.941719727                             | 0.010499751                                           | 4.814233994                          |
| 433.604171                                             | 0.917318713                             | 0.006569542                                           | 4.884771086                          |
| 203.3997902                                            | 0.936339523                             | 0.021193741                                           | 4.182461564                          |
| 204.3914837                                            | 0.91556836                              | 0.020937596                                           | 4.679548853                          |
| 285.9859432                                            | 0.872127325                             | 0.01296451                                            | 4.675558365                          |
| 261.4083808                                            | 0.941071782                             | 0.029095195                                           | 4.935865992                          |
| 689.9932079                                            | 0.948503172                             | 0.004361434                                           | 5.021660182                          |
| 270.3667161                                            | 0.925598991                             | 0.015716633                                           | 4.377854912                          |
| 177.0534591                                            | 0.939194139                             | 0.034055268                                           | 4.274180661                          |
| 459.6878579                                            | 0.889927431                             | 0.007913913                                           | 4.967041941                          |
| 205.212366                                             | 0.9455219                               | 0.061967224                                           | 4.863932                             |
| 154.6692186                                            | 0.885744393                             | 0.038869393                                           | 4.560901973                          |
| 275.8859157                                            | 0.897197668                             | 0.012846964                                           | 4.712997917                          |
| 208.379775                                             | 0.881978855                             | 0.026597337                                           | 4.716893509                          |
| 532.4913333                                            | 0.96138644                              | 0.014016981                                           | 4.989021286                          |
| 401.6006342                                            | 0.919534413                             | 0.008843116                                           | 4.84342728                           |
| 142.1146093                                            | 0.950594121                             | 0.069000896                                           | 4.304691091                          |
| 258.2828485                                            | 0.91292876                              | 0.028876918                                           | 4.521191299                          |
| 344.1152179                                            | 0.914212182                             | 0.015373375                                           | 5.012764202                          |

| log.sigma.4.5.mm.3D_glrIm_HighGrayLevelRunEmphasis | log.sigma.4.5.mm.3D_glrIm_RunLengthNonUniformityNormalized | log.sigma.4.5.mm.3D_glszm_GrayLevelVariance |
|----------------------------------------------------|------------------------------------------------------------|---------------------------------------------|
| 311.2306475                                        | 0.892702525                                                | 49.48568664                                 |
| 182.238025                                         | 0.802515295                                                | 30.64669328                                 |
| 153.5023841                                        | 0.870642749                                                | 22.27308258                                 |
| 401.3550376                                        | 0.863342421                                                | 36.75724799                                 |
| 400.6545088                                        | 0.891596821                                                | 49.71747919                                 |
| 163.1262825                                        | 0.870862305                                                | 23.7614142                                  |
| 99.57068948                                        | 0.822012172                                                | 15.31925154                                 |
| 352.0330954                                        | 0.901303466                                                | 52.89456467                                 |
| 374.2675476                                        | 0.878360969                                                | 47.70650447                                 |
| 224.4785257                                        | 0.833109846                                                | 27.65831831                                 |
| 225.1313697                                        | 0.882872669                                                | 28.92272237                                 |
| 204.8988066                                        | 0.85604431                                                 | 35.11684381                                 |
| 164.9495051                                        | 0.842642665                                                | 31.45729599                                 |
| 261.2555037                                        | 0.874284467                                                | 30.02763325                                 |
| 219.85456                                          | 0.864117745                                                | 34.53278001                                 |
| 235.769709                                         | 0.689066535                                                | 28.22320492                                 |
| 258.8138798                                        | 0.890001351                                                | 34.50361473                                 |
| 204.6281761                                        | 0.86466308                                                 | 35.75950245                                 |
| 440.6360794                                        | 0.891309106                                                | 46.05254809                                 |
| 135.7675934                                        | 0.805901963                                                | 22.2408824                                  |
| 197.8395313                                        | 0.776775546                                                | 20.48210829                                 |
| 185.1494837                                        | 0.860261344                                                | 29.8832815                                  |
| 229.2069751                                        | 0.844962958                                                | 27.23192094                                 |
| 293.0436854                                        | 0.8697254                                                  | 33.56484429                                 |
| 92.9965655                                         | 0.837437002                                                | 16.94691087                                 |
| 245.6582181                                        | 0.883183778                                                | 38.18004358                                 |
| 213.2837754                                        | 0.734741776                                                | 28.99633758                                 |
| 140.9477894                                        | 0.85460014                                                 | 22.26397917                                 |
| 295.6453793                                        | 0.899871051                                                | 34.35954858                                 |
| 215.5259091                                        | 0.791582192                                                | 32.17604885                                 |
| 156.89142                                          | 0.836780023                                                | 20.73304025                                 |
| 229.1635122                                        | 0.82503167                                                 | 29.72862247                                 |
| 262.4724177                                        | 0.871086535                                                | 39.34982358                                 |
| 179.2201789                                        | 0.925906431                                                | 29.94101509                                 |
| 316.2723358                                        | 0.885240008                                                | 33.62837126                                 |
| 267.1781986                                        | 0.878399849                                                | 33.96986936                                 |
| 182.3546548                                        | 0.854213271                                                | 32.15071669                                 |
| 171.9987634                                        | 0.815611666                                                | 22.55799232                                 |
| 300.2921511                                        | 0.832159692                                                | 36.965775                                   |
| 225.4709858                                        | 0.877594353                                                | 36.87357491                                 |
| 263.0500721                                        | 0.815000962                                                | 31.71674673                                 |
| 304.8527789                                        | 0.898611811                                                | 42.96186515                                 |
| 246.5207508                                        | 0.889485354                                                | 32.04348042                                 |
| 322.9458453                                        | 0.890156648                                                | 47.82419753                                 |
| 225.7657119                                        | 0.853948352                                                | 35.72845125                                 |
| 103.1275997                                        | 0.797462945                                                | 17.02093918                                 |
| 244.4789011                                        | 0.842355086                                                | 31.64729582                                 |
| 201.6010504                                        | 0.891391496                                                | 28.06894429                                 |
| 215.0169987                                        | 0.882139268                                                | 31.59533608                                 |
| 472.4349797                                        | 0.894784315                                                | 63.16040094                                 |
| 193.2849156                                        | 0.829723224                                                | 28.03584026                                 |
| 216.8139279                                        | 0.894636611                                                | 29.59382806                                 |
| 252.3961675                                        | 0.846586106                                                | 37.4080384                                  |
| 204.7354631                                        | 0.850472871                                                | 27.91239902                                 |
| 173.6296839                                        | 0.772560788                                                | 26.68883537                                 |
| 308.8493249                                        | 0.896946708                                                | 46.0068639                                  |
| 349.8370842                                        | 0.891079055                                                | 37.58874723                                 |
| 462.7149057                                        | 0.871080535                                                | 44.16286316                                 |
| 198.6193242                                        | 0.854780081                                                | 30.3649095                                  |
| 169.051881                                         | 0.868828807                                                | 20.78492879                                 |
| 209.4453567                                        | 0.877411947                                                | 35.70576291                                 |
| 279.2756955                                        | 0.850402564                                                | 36.76579066                                 |
| 136.7367591                                        | 0.799232372                                                | 23.0022959                                  |
| 203.2901951                                        | 0.762781689                                                | 24.28292896                                 |
| 236.0873644                                        | 0.897840291                                                | 35.15212411                                 |
| 221.4627329                                        | 0.856274874                                                | 37.89587454                                 |
| 365.091792                                         | 0.900678228                                                | 50.71022277                                 |
| 247.0025879                                        | 0.871390716                                                | 40.39340247                                 |
| 277.9340939                                        | 0.90726665                                                 | 39.46607855                                 |
| 171.2389057                                        | 0.867729747                                                | 31.54818905                                 |
| 223.5920623                                        | 0.859010342                                                | 32.88151914                                 |
| 253.6145491                                        | 0.892311075                                                | 38.42665746                                 |
| 163.540915                                         | 0.824626087                                                | 27.27370442                                 |
| 224.2147275                                        | 0.795624563                                                | 20.52271328                                 |
| 193.9821608                                        | 0.777781413                                                | 32.84120678                                 |
| 380.3844855                                        | 0.896827722                                                | 47.88948521                                 |
| 215.5072584                                        | 0.877047746                                                | 30.84777208                                 |
| 232.1419531                                        | 0.905281411                                                | 39.46343804                                 |
| 232.1053736                                        | 0.874606933                                                | 31.0224959                                  |
| 270.3385176                                        | 0.853767451                                                | 24.52235245                                 |
| 374.127363                                         | 0.917806182                                                | 56.07994304                                 |
| 295.1234582                                        | 0.891414742                                                | 33.33228686                                 |
| 335.0762676                                        | 0.856805406                                                | 37.56704276                                 |
| 167.9611296                                        | 0.878092637                                                | 21.30102041                                 |
| 161.2110107                                        | 0.856439817                                                | 24.68895902                                 |
| 197.091151                                         | 0.790528521                                                | 26.31429544                                 |
| 225.3164507                                        | 0.892140353                                                | 39.22919316                                 |
| 587.6893656                                        | 0.906085151                                                | 47.91317724                                 |
| 216.0919385                                        | 0.863565927                                                | 27.09660782                                 |
| 151.8211735                                        | 0.886462635                                                | 28.99555556                                 |
| 323.1995739                                        | 0.822551553                                                | 39.23145302                                 |
| 183.3700697                                        | 0.900790283                                                | 37.4058948                                  |
| 109.7879756                                        | 0.807000084                                                | 19.94518841                                 |
| 199.4211673                                        | 0.828269849                                                | 29.03181509                                 |
| 143.5513782                                        | 0.810267141                                                | 24.17484979                                 |
| 467.3190981                                        | 0.927969792                                                | 64.78481452                                 |
| 309.1025893                                        | 0.858952923                                                | 39.91792549                                 |
| 125.4268437                                        | 0.905796464                                                | 20.58145065                                 |
| 194.987943                                         | 0.842621105                                                | 24.16493656                                 |
| 276.7597987                                        | 0.849224769                                                | 47.86096563                                 |



| log.sigma.4.5.mm.3D_glszm_SmallAreaHighGrayLevelEmphasis | log.sigma.4.5.mm.3D_glszm_GrayLevelNonUniformityNormalized | log.sigma.4.5.mm.3D_glszm_SizeZoneNonUniformityNormalized |
|----------------------------------------------------------|------------------------------------------------------------|-----------------------------------------------------------|
| 242.4496468                                              | 0.040644988                                                | 0.370857296                                               |
| 146.73106                                                | 0.050458492                                                | 0.304879737                                               |
| 117.3015786                                              | 0.059198967                                                | 0.320664061                                               |
| 216.1383144                                              | 0.045588585                                                | 0.289784648                                               |
| 266.2403411                                              | 0.041426873                                                | 0.323376932                                               |
| 99.31721636                                              | 0.060825943                                                | 0.22858252                                                |
| 77.50975896                                              | 0.076003086                                                | 0.249228395                                               |
| 237.6202606                                              | 0.038689391                                                | 0.3443044                                                 |
| 254.2825378                                              | 0.040285553                                                | 0.316201996                                               |
| 175.5601446                                              | 0.052518743                                                | 0.32087286                                                |
| 104.5560163                                              | 0.052308125                                                | 0.250797523                                               |
| 142.0678376                                              | 0.048514305                                                | 0.272321031                                               |
| 103.3250177                                              | 0.048814241                                                | 0.243395044                                               |
| 162.4569801                                              | 0.05074286                                                 | 0.293950168                                               |
| 151.5019627                                              | 0.048110752                                                | 0.300526092                                               |
| 163.9435859                                              | 0.052413756                                                | 0.295407662                                               |
| 168.8856088                                              | 0.048733284                                                | 0.291238497                                               |
| 151.987704                                               | 0.046085343                                                | 0.296987688                                               |
| 253.2588805                                              | 0.044880693                                                | 0.293707449                                               |
| 100.5955988                                              | 0.059353299                                                | 0.263581453                                               |
| 142.041087                                               | 0.063361545                                                | 0.266271701                                               |
| 125.3298479                                              | 0.052753741                                                | 0.279437834                                               |
| 169.1935894                                              | 0.055162583                                                | 0.279330223                                               |
| 151.1412707                                              | 0.04982699                                                 | 0.26615917                                                |
| 79.32650857                                              | 0.069321574                                                | 0.320996672                                               |
| 195.8598609                                              | 0.04484352                                                 | 0.339345726                                               |
| 151.4042625                                              | 0.052713646                                                | 0.275621196                                               |
| 117.0679965                                              | 0.059881353                                                | 0.313336988                                               |
| 176.7286982                                              | 0.046649176                                                | 0.352578294                                               |
| 160.657043                                               | 0.049305616                                                | 0.288069797                                               |
| 126.7701483                                              | 0.06266053                                                 | 0.302252998                                               |
| 159.6937704                                              | 0.050833086                                                | 0.282465085                                               |
| 154.8981087                                              | 0.043815693                                                | 0.292591898                                               |
| 125.5543158                                              | 0.054183813                                                | 0.351165981                                               |
| 185.472179                                               | 0.051646103                                                | 0.275466551                                               |
| 156.7357726                                              | 0.047388484                                                | 0.295492862                                               |
| 148.4208776                                              | 0.049421908                                                | 0.298177316                                               |
| 95.26703676                                              | 0.05809232                                                 | 0.247218784                                               |
| 157.4011196                                              | 0.0472                                                     | 0.24155                                                   |
| 162.7959192                                              | 0.04602358                                                 | 0.343295582                                               |
| 175.5783607                                              | 0.051780009                                                | 0.258854511                                               |
| 205.7180682                                              | 0.042855677                                                | 0.34271864                                                |
| 143.1484533                                              | 0.048608809                                                | 0.297407617                                               |
| 203.1904826                                              | 0.041670477                                                | 0.319408627                                               |
| 145.3127766                                              | 0.04646849                                                 | 0.296147444                                               |
| 87.99610434                                              | 0.067660199                                                | 0.292229158                                               |
| 157.5969447                                              | 0.048802273                                                | 0.276625541                                               |
| 139.3776513                                              | 0.053978147                                                | 0.332987073                                               |
| 179.9454345                                              | 0.055555556                                                | 0.331961591                                               |
| 290.4740562                                              | 0.037545339                                                | 0.352661504                                               |
| 132.5158037                                              | 0.052822641                                                | 0.249854742                                               |
| 122.0198872                                              | 0.052187322                                                | 0.31949968                                                |
| 176.6433405                                              | 0.045617598                                                | 0.30263049                                                |
| 123.3720534                                              | 0.053726566                                                | 0.245160799                                               |
| 135.2119263                                              | 0.054946032                                                | 0.288079334                                               |
| 219.5510701                                              | 0.041310285                                                | 0.332972778                                               |
| 248.9556136                                              | 0.045227284                                                | 0.351734159                                               |
| 260.2773221                                              | 0.044609418                                                | 0.309172299                                               |
| 152.4521519                                              | 0.051716798                                                | 0.289969319                                               |
| 91.06762065                                              | 0.061354486                                                | 0.231867075                                               |
| 166.1169001                                              | 0.046255537                                                | 0.329358436                                               |
| 161.2574277                                              | 0.046624436                                                | 0.291344435                                               |
| 97.3668871                                               | 0.05872152                                                 | 0.269436513                                               |
| 135.9265502                                              | 0.056787405                                                | 0.240869766                                               |
| 150.7076446                                              | 0.052269888                                                | 0.294460641                                               |
| 157.5605311                                              | 0.045224368                                                | 0.31225715                                                |
| 274.0042111                                              | 0.040418388                                                | 0.362086777                                               |
| 172.2582309                                              | 0.043742025                                                | 0.305271309                                               |
| 208.7608714                                              | 0.046138766                                                | 0.399379215                                               |
| 127.9678683                                              | 0.049584016                                                | 0.303100672                                               |
| 164.694725                                               | 0.048177918                                                | 0.323475103                                               |
| 169.9085949                                              | 0.045028002                                                | 0.294976703                                               |
| 131.3614595                                              | 0.052904225                                                | 0.27759392                                                |
| 163.0123583                                              | 0.062175917                                                | 0.271078686                                               |
| 121.0447989                                              | 0.049367726                                                | 0.261049501                                               |
| 279.3634488                                              | 0.041381258                                                | 0.362421439                                               |
| 142.6908778                                              | 0.050643001                                                | 0.288141673                                               |
| 155.4026825                                              | 0.044685337                                                | 0.312013408                                               |
| 164.2720875                                              | 0.049465747                                                | 0.317951107                                               |
| 178.3588116                                              | 0.05639805                                                 | 0.272630794                                               |
| 281.9674392                                              | 0.038234247                                                | 0.393919544                                               |
| 190.2099566                                              | 0.048261003                                                | 0.347159126                                               |
| 207.5468571                                              | 0.045734016                                                | 0.296932298                                               |
| 107.2934005                                              | 0.071428571                                                | 0.290816327                                               |
| 115.4228664                                              | 0.055724108                                                | 0.281591378                                               |
| 133.643855                                               | 0.053736293                                                | 0.269604247                                               |
| 168.5853836                                              | 0.044720396                                                | 0.336615895                                               |
| 386.9981238                                              | 0.041172849                                                | 0.363206647                                               |
| 149.7537364                                              | 0.059313628                                                | 0.385836144                                               |
| 108.8009397                                              | 0.065679012                                                | 0.372839506                                               |
| 216.7831575                                              | 0.04400091                                                 | 0.306458855                                               |
| 168.6606276                                              | 0.046147227                                                | 0.389347054                                               |
| 64.56336261                                              | 0.062630104                                                | 0.244242653                                               |
| 133.5680936                                              | 0.051173987                                                | 0.270467507                                               |
| 105.0083558                                              | 0.05650539                                                 | 0.287256047                                               |
| 301.6988568                                              | 0.037492561                                                | 0.411723864                                               |
| 157.4731942                                              | 0.044134405                                                | 0.283520818                                               |
| 89.1740398                                               | 0.067776457                                                | 0.343043995                                               |
| 79.61745266                                              | 0.064013841                                                | 0.20165321                                                |
| 258.1034798                                              | 0.042222126                                                | 0.417416898                                               |

| log.sigma.4.5.mm.3D_glszm_SizeZoneNonUniformity | log.sigma.4.5.mm.3D_glszm_GrayLevelNonUniformity | log.sigma.4.5.mm.3D_glszm_LargeAreaEmphasis | log.sigma.4.5.mm.3D_glszm_ZoneVariance |
|-------------------------------------------------|--------------------------------------------------|---------------------------------------------|----------------------------------------|
| 113.1114754                                     | 12.39672131                                      | 13.94098361                                 | 8.582897071                            |
| 157.622824                                      | 26.08704062                                      | 152.0909091                                 | 135.9513411                            |
| 53.5508982                                      | 9.886227545                                      | 18.28742515                                 | 11.53365126                            |
| 252.1126437                                     | 39.66206897                                      | 38.23103448                                 | 29.05779495                            |
| 46.88965517                                     | 6.006896552                                      | 13.19310345                                 | 7.063210464                            |
| 41.83060109                                     | 11.13114754                                      | 31.41530055                                 | 19.0694855                             |
| 17.94444444                                     | 5.472222222                                      | 70.51388889                                 | 48.60628858                            |
| 149.7724138                                     | 16.82988506                                      | 10.96551724                                 | 5.659643282                            |
| 241.2621232                                     | 30.7378768                                       | 20.60419397                                 | 13.17981892                            |
| 282.6889898                                     | 46.26901249                                      | 78.59477866                                 | 66.22929779                            |
| 73.23287671                                     | 15.2739726                                       | 15.35958904                                 | 7.338278758                            |
| 129.0801688                                     | 22.99578059                                      | 32.3164557                                  | 22.54093895                            |
| 114.6390658                                     | 22.99150743                                      | 79.50318471                                 | 60.11327933                            |
| 109.3494624                                     | 18.87634409                                      | 22.30645161                                 | 13.27416464                            |
| 91.05940594                                     | 14.57755776                                      | 27.74587459                                 | 18.70622706                            |
| 285.0683938                                     | 50.57927461                                      | 3396.353368                                 | 3344.528289                            |
| 82.4204947                                      | 13.79151943                                      | 10.71378092                                 | 4.63049857                             |
| 228.6805195                                     | 35.48571429                                      | 43.11428571                                 | 33.94204082                            |
| 72.25203252                                     | 11.04065041                                      | 9.536585366                                 | 3.939321832                            |
| 151.8229167                                     | 34.1875                                          | 209.0052083                                 | 185.3579252                            |
| 255.6208333                                     | 60.82708333                                      | 514.6458333                                 | 485.0340972                            |
| 144.1899225                                     | 27.22093023                                      | 34.30232558                                 | 23.19121447                            |
| 214.8049415                                     | 42.42002601                                      | 90.9869961                                  | 78.37479983                            |
| 45.24705882                                     | 8.470588235                                      | 19.66470588                                 | 11.65913495                            |
| 106.8918919                                     | 23.08408408                                      | 73.05705706                                 | 59.98438078                            |
| 93.65942029                                     | 12.37681159                                      | 15.94927536                                 | 9.626601554                            |
| 155.4503546                                     | 29.73049645                                      | 843.9219858                                 | 806.1561667                            |
| 141.6283186                                     | 27.06637168                                      | 40.04646018                                 | 29.9953158                             |
| 274.3059126                                     | 36.29305913                                      | 11.98586118                                 | 6.83914493                             |
| 184.94081                                       | 31.65420561                                      | 163.5015576                                 | 147.823905                             |
| 265.3781321                                     | 55.01594533                                      | 102.215262                                  | 89.10558398                            |
| 445.1649746                                     | 80.11294416                                      | 92.37817259                                 | 78.22033388                            |
| 192.2328767                                     | 28.7869102                                       | 34.04718417                                 | 24.47206874                            |
| 18.96296296                                     | 2.925925926                                      | 5.259259259                                 | 1.550068587                            |
| 34.98425197                                     | 6.559055118                                      | 13.35433071                                 | 6.520429041                            |
| 205.0720461                                     | 32.88760807                                      | 24.00864553                                 | 15.53668746                            |
| 264.1851016                                     | 43.78781038                                      | 39.59142212                                 | 29.02525363                            |
| 179.9752747                                     | 42.29120879                                      | 157.7335165                                 | 136.5077512                            |
| 48.31                                           | 9.44                                             | 79.165                                      | 61.734375                              |
| 136.9749373                                     | 18.36340852                                      | 26.01253133                                 | 19.10050816                            |
| 93.96418733                                     | 18.79614325                                      | 105.9559229                                 | 89.46740129                            |
| 139.4864865                                     | 17.44226044                                      | 11.73218673                                 | 6.249455173                            |
| 184.095315                                      | 30.08885299                                      | 15.98061389                                 | 8.943979163                            |
| 129.3604938                                     | 16.87654321                                      | 13.16790123                                 | 6.762627648                            |
| 171.7655172                                     | 26.95172414                                      | 41.83793103                                 | 31.35373365                            |
| 145.5301205                                     | 33.69477912                                      | 234.6144578                                 | 214.5987161                            |
| 316.7362445                                     | 55.87860262                                      | 61.84104803                                 | 47.95972922                            |
| 75.92105263                                     | 12.30701754                                      | 15.36403509                                 | 8.282696368                            |
| 17.92592593                                     | 3                                                | 11.40740741                                 | 5.249657064                            |
| 71.23762376                                     | 7.584158416                                      | 16.31188119                                 | 10.25833252                            |
| 220.3718821                                     | 46.58956916                                      | 94.96598639                                 | 79.89539338                            |
| 106.3933934                                     | 17.37837838                                      | 14.78978979                                 | 8.622099577                            |
| 364.3671096                                     | 54.92358804                                      | 60.6038206                                  | 50.53215955                            |
| 39.71604938                                     | 8.703703704                                      | 38.19135802                                 | 24.88237311                            |
| 384.0097524                                     | 73.24306077                                      | 1280.864966                                 | 1256.918885                            |
| 128.8604651                                     | 15.9870801                                       | 9.930232558                                 | 4.771347876                            |
| 326.7610334                                     | 42.01614639                                      | 13.16146394                                 | 7.589018366                            |
| 146.8568421                                     | 21.18947368                                      | 24.42736842                                 | 17.01751136                            |
| 75.68199234                                     | 13.49808429                                      | 35.70881226                                 | 25.98206133                            |
| 59.82170543                                     | 15.82945736                                      | 29.18217054                                 | 17.52179857                            |
| 250.9711286                                     | 35.24671916                                      | 34.85958005                                 | 27.12650953                            |
| 503.7345286                                     | 80.61364951                                      | 45.15211105                                 | 35.11395207                            |
| 176.480916                                      | 38.46259542                                      | 236.8824427                                 | 214.6270963                            |
| 119.7122736                                     | 28.22334004                                      | 471.0201207                                 | 440.8254274                            |
| 28.85714286                                     | 5.12244898                                       | 7.704081633                                 | 2.801020408                            |
| 166.7453184                                     | 24.14981273                                      | 29.17041199                                 | 20.71255383                            |
| 63.72727273                                     | 7.113636364                                      | 9.75                                        | 4.788507231                            |
| 343.4302222                                     | 49.20977778                                      | 29.976                                      | 21.90029906                            |
| 82.67149758                                     | 9.550724638                                      | 9.256038647                                 | 4.613783285                            |
| 209.7456647                                     | 34.31213873                                      | 29.56791908                                 | 21.12267993                            |
| 339.0019084                                     | 50.49045802                                      | 34.73664122                                 | 26.32221316                            |
| 131.8545861                                     | 20.12751678                                      | 13.50111857                                 | 7.121821339                            |
| 341.7181154                                     | 65.12510154                                      | 139.754671                                  | 122.12968                              |
| 377.0704529                                     | 86.48670022                                      | 285.6534867                                 | 262.3421533                            |
| 488.1625668                                     | 92.31764706                                      | 1014.147594                                 | 990.04842                              |
| 172.512605                                      | 19.69747899                                      | 13.6302521                                  | 8.133394534                            |
| 111.7989691                                     | 19.64948454                                      | 21.92010309                                 | 13.63223377                            |
| 84.86764706                                     | 12.15441176                                      | 8.727941176                                 | 3.698475346                            |
| 204.1246106                                     | 31.75700935                                      | 26.72897196                                 | 19.17931697                            |
| 232.8266979                                     | 48.16393443                                      | 37.04683841                                 | 25.94093095                            |
| 104.3886792                                     | 10.13207547                                      | 5.833962264                                 | 2.216788893                            |
| 197.8807018                                     | 27.50877193                                      | 11.84035088                                 | 6.305475531                            |
| 266.0513393                                     | 40.97767857                                      | 46.89955357                                 | 37.18965242                            |
| 16.28571429                                     | 4                                                | 12.48214286                                 | 5.777742347                            |
| 272.2988625                                     | 53.885212                                        | 49.45294726                                 | 37.15584934                            |
| 280.6580211                                     | 55.93948127                                      | 527.5254563                                 | 499.8544203                            |
| 112.0930931                                     | 14.89189189                                      | 13.01501502                                 | 7.556547539                            |
| 258.9663394                                     | 29.35624123                                      | 9.467040673                                 | 4.728939019                            |
| 27.3943662                                      | 4.211267606                                      | 15.3943662                                  | 8.75104146                             |
| 16.77777778                                     | 2.955555556                                      | 12.55555556                                 | 7.111111111                            |
| 354.266436                                      | 50.8650519                                       | 186.8849481                                 | 175.0611066                            |
| 130.0419162                                     | 15.41317365                                      | 9.676646707                                 | 5.208612715                            |
| 60.32793522                                     | 15.46963563                                      | 86.93927126                                 | 69.81910866                            |
| 268.0332997                                     | 50.71342079                                      | 139.691221                                  | 122.6579009                            |
| 376.5926773                                     | 74.07856598                                      | 294.7719298                                 | 275.1587198                            |
| 58.46478873                                     | 5.323943662                                      | 4.866197183                                 | 1.691777425                            |
| 104.9027027                                     | 16.32972973                                      | 42.60540541                                 | 31.80441198                            |
| 19.89655172                                     | 3.931034483                                      | 7.155172414                                 | 2.6578478                              |
| 20.56862745                                     | 6.529411765                                      | 34.97058824                                 | 21.16426374                            |
| 126.8947368                                     | 12.83552632                                      | 26.97039474                                 | 19.92346563                            |

| log.sigma.4.5.mm.3D_glszm_ZonePercentage | log.sigma.4.5.mm.3D_glszm_LargeAreaLowGrayLevelEmphasis | log.sigma.4.5.mm.3D_glszm_LargeAreaHighGrayLevelEmphasis | log.sigma.4.5.mm.3D_glszm_HighGrayLevelZoneEmphasis |
|------------------------------------------|---------------------------------------------------------|----------------------------------------------------------|-----------------------------------------------------|
| 0.432011331                              | 0.115487304                                             | 3405.931148                                              | 360.2852459                                         |
| 0.248916707                              | 1.268015003                                             | 24356.32302                                              | 235.6847195                                         |
| 0.384792627                              | 0.4102674                                               | 1746.976048                                              | 188.1736527                                         |
| 0.330170778                              | 0.123779245                                             | 14414.17701                                              | 397.1896552                                         |
| 0.403899721                              | 0.075406598                                             | 5128.351724                                              | 422.6068966                                         |
| 0.284603421                              | 0.734410672                                             | 4022.398907                                              | 191.2021858                                         |
| 0.213649852                              | 1.904252395                                             | 4973.861111                                              | 136.625                                             |
| 0.434131737                              | 0.104469129                                             | 3297.455172                                              | 380.2965517                                         |
| 0.367003367                              | 0.118142486                                             | 6365.221494                                              | 417.7771953                                         |
| 0.284377017                              | 0.663245226                                             | 11987.51192                                              | 282.569807                                          |
| 0.353083434                              | 0.182604814                                             | 3337.890411                                              | 220.4417808                                         |
| 0.319838057                              | 0.473525247                                             | 4762.409283                                              | 246.7763713                                         |
| 0.227097396                              | 1.430470791                                             | 10595.32484                                              | 192.8174098                                         |
| 0.33273703                               | 0.178017868                                             | 5641.336022                                              | 274.4623656                                         |
| 0.332601537                              | 0.259724179                                             | 5044.663366                                              | 251.9735974                                         |
| 0.138908882                              | 16.48230381                                             | 712991.9896                                              | 282.2704663                                         |
| 0.405444126                              | 0.303318187                                             | 2440.416961                                              | 285.3286219                                         |
| 0.330188679                              | 1.030246565                                             | 4574.136364                                              | 258.0792208                                         |
| 0.422680412                              | 0.066293557                                             | 3971.325203                                              | 457.8455285                                         |
| 0.205640843                              | 3.110021494                                             | 21981.24653                                              | 181.6753472                                         |
| 0.183767228                              | 3.572370537                                             | 80438.1125                                               | 255.178125                                          |
| 0.3                                      | 0.601593024                                             | 4417.625969                                              | 222.1569767                                         |
| 0.281581838                              | 0.672276731                                             | 14652.91678                                              | 285.4421326                                         |
| 0.353430353                              | 0.152922201                                             | 6689.605882                                              | 284.6941176                                         |
| 0.276578073                              | 2.269271617                                             | 4405.660661                                              | 123.6006006                                         |
| 0.397694524                              | 0.176139404                                             | 2839.768116                                              | 296.3876812                                         |
| 0.162723601                              | 4.909454763                                             | 152528.4433                                              | 273.608156                                          |
| 0.315422191                              | 1.115441593                                             | 3429.820796                                              | 188.6283186                                         |
| 0.440793201                              | 0.100633217                                             | 3333.380463                                              | 294.8624679                                         |
| 0.252557042                              | 0.920264976                                             | 35960.53894                                              | 268.6744548                                         |
| 0.27618748                               | 1.484905971                                             | 8995.43508                                               | 207.998861                                          |
| 0.265767285                              | 0.754828789                                             | 15673.29378                                              | 278.4511421                                         |
| 0.323167732                              | 0.249107337                                             | 8117.908676                                              | 278.1628615                                         |
| 0.519230769                              | 0.102440625                                             | 861.9074074                                              | 195.1111111                                         |
| 0.38253012                               | 0.083394416                                             | 4473.173228                                              | 321.2913386                                         |
| 0.343564356                              | 0.197049233                                             | 6331.51585                                               | 278.0317003                                         |
| 0.307638889                              | 0.658951426                                             | 4467.545147                                              | 238.0699774                                         |
| 0.217054264                              | 1.73800584                                              | 24177.38874                                              | 189.4574176                                         |
| 0.239520958                              | 0.360508233                                             | 25791.26                                                 | 303.145                                             |
| 0.38036225                               | 0.350192183                                             | 4957.531328                                              | 255.8245614                                         |
| 0.246268657                              | 0.556767055                                             | 23942.39118                                              | 317.7272727                                         |
| 0.427072403                              | 0.161478943                                             | 3294.936118                                              | 325.1523342                                         |
| 0.376979294                              | 0.177412844                                             | 3841.279483                                              | 252.7027464                                         |
| 0.395121951                              | 0.117519982                                             | 3984.437037                                              | 341.3753086                                         |
| 0.308839191                              | 0.341092517                                             | 8397.063793                                              | 252.6810345                                         |
| 0.223518851                              | 5.015208052                                             | 13174.76707                                              | 149.5481928                                         |
| 0.268401313                              | 0.431726673                                             | 12657.11179                                              | 278.4253275                                         |
| 0.391080617                              | 0.610548536                                             | 2372.333333                                              | 225.0526316                                         |
| 0.402985075                              | 0.164157264                                             | 2228.740741                                              | 251.0740741                                         |
| 0.406438632                              | 0.132292403                                             | 7812.975248                                              | 465.3415842                                         |
| 0.257593458                              | 0.989490384                                             | 13730.30385                                              | 235.0759637                                         |
| 0.402660218                              | 0.303470465                                             | 2636.345345                                              | 218.2642643                                         |
| 0.315100759                              | 0.435261121                                             | 11480.75498                                              | 295.6187708                                         |
| 0.274111675                              | 0.443262781                                             | 6744.820988                                              | 228.9567901                                         |
| 0.204353825                              | 8.893188788                                             | 198954.7764                                              | 227.6774194                                         |
| 0.440273038                              | 0.086657875                                             | 2755.979328                                              | 338.620155                                          |
| 0.423620611                              | 0.080934797                                             | 3847.753498                                              | 387.5888052                                         |
| 0.367362722                              | 0.066230296                                             | 12257.12211                                              | 457.0652632                                         |
| 0.320638821                              | 0.506760553                                             | 5234.321839                                              | 250.5632184                                         |
| 0.292849035                              | 0.579302119                                             | 3864.523256                                              | 186.7751938                                         |
| 0.359603587                              | 0.692404707                                             | 3502.652231                                              | 263.1929134                                         |
| 0.315626141                              | 0.273014226                                             | 10881.59861                                              | 296.1266628                                         |
| 0.21197411                               | 2.394158576                                             | 28985.37557                                              | 169.2091603                                         |
| 0.181984621                              | 2.779513006                                             | 86291.60362                                              | 262.7585513                                         |
| 0.451612903                              | 0.129151236                                             | 1591.928571                                              | 261.0714286                                         |
| 0.343850612                              | 0.224297589                                             | 5494.333333                                              | 253.6666667                                         |
| 0.446700508                              | 0.136938538                                             | 3318.448864                                              | 402.2727273                                         |
| 0.351892399                              | 0.361484433                                             | 5866.369778                                              | 288.9111111                                         |
| 0.464125561                              | 0.224616585                                             | 2392.405797                                              | 299.6570048                                         |
| 0.344107409                              | 0.59749616                                              | 3147.395954                                              | 208.0693642                                         |
| 0.344736842                              | 0.412169837                                             | 5559.487595                                              | 267.2519084                                         |
| 0.395925598                              | 0.220097704                                             | 2550.42953                                               | 290.6465324                                         |
| 0.238196594                              | 1.638036487                                             | 18170.30707                                              | 221.4809098                                         |
| 0.207117332                              | 1.865604224                                             | 53004.1294                                               | 287.8957584                                         |
| 0.203703704                              | 6.25586397                                              | 170210.5337                                              | 223.9016043                                         |
| 0.426523297                              | 0.077748287                                             | 4679.029412                                              | 419.5042017                                         |
| 0.347358997                              | 0.270572837                                             | 3759.670103                                              | 241.4716495                                         |
| 0.445901639                              | 0.206285137                                             | 1750.286765                                              | 255.8345588                                         |
| 0.363945578                              | 0.32697324                                              | 3998.758567                                              | 266.7071651                                         |
| 0.300070274                              | 0.260151258                                             | 7292.704918                                              | 317.1967213                                         |
| 0.525793651                              | 0.077867444                                             | 1875.169811                                              | 409.8037736                                         |
| 0.425055928                              | 0.092349383                                             | 3326.829825                                              | 307.0315789                                         |
| 0.320916905                              | 0.182398324                                             | 14737.51563                                              | 355.1305804                                         |
| 0.386206897                              | 0.133582479                                             | 2006.232143                                              | 181.1428571                                         |
| 0.285166618                              | 0.752384845                                             | 5355.236815                                              | 198.7269907                                         |
| 0.190102264                              | 4.082083389                                             | 74542.80211                                              | 245.1325648                                         |
| 0.428020566                              | 0.401610089                                             | 1992.807808                                              | 261.0870871                                         |
| 0.459407216                              | 0.029646799                                             | 5693.791024                                              | 600.85554                                           |
| 0.387978142                              | 0.124776616                                             | 3180.802817                                              | 226.6619718                                         |
| 0.428571429                              | 0.261034782                                             | 1423.888889                                              | 174.6                                               |
| 0.29081761                               | 0.687859399                                             | 54753.93945                                              | 366.8226644                                         |
| 0.473087819                              | 0.888225646                                             | 1007.113772                                              | 232.4011976                                         |
| 0.241682975                              | 1.829023403                                             | 7537.234818                                              | 132.6315789                                         |
| 0.242298289                              | 1.106380294                                             | 23235.71847                                              | 237.6316852                                         |
| 0.225800896                              | 3.225514181                                             | 40960.43021                                              | 179.3302822                                         |
| 0.561264822                              | 0.043880258                                             | 2507.985915                                              | 451.6549296                                         |
| 0.304276316                              | 0.182741884                                             | 13173.02973                                              | 306.0486486                                         |
| 0.471544715                              | 0.464885173                                             | 723.862069                                               | 140.0689655                                         |
| 0.269129288                              | 0.419643673                                             | 7170.137255                                              | 188.6078431                                         |
| 0.376703841                              | 0.266495168                                             | 5506.980263                                              | 353.0756579                                         |

| log.sigma.4.5.mm.3D_glszm_SmallAreaEmphasis | log.sigma.4.5.mm.3D_glszm_LowGrayLevelZoneEmphasis | log.sigma.4.5.mm.3D_glszm_ZoneEntropy | log.sigma.4.5.mm.3D_glszm_SmallAreaLowGrayLevelEmphasis |
|---------------------------------------------|----------------------------------------------------|---------------------------------------|---------------------------------------------------------|
| 0.628816083                                 | 0.010796824                                        | 6.320373547                           | 0.007778896                                             |
| 0.569544663                                 | 0.016704965                                        | 6.545704324                           | 0.009395785                                             |
| 0.576563012                                 | 0.017953922                                        | 5.83485117                            | 0.007721276                                             |
| 0.548458305                                 | 0.005344633                                        | 6.797638755                           | 0.003466091                                             |
| 0.586135081                                 | 0.012493845                                        | 6.107336376                           | 0.009287529                                             |
| 0.477910522                                 | 0.018687434                                        | 6.115327642                           | 0.005937353                                             |
| 0.506696341                                 | 0.029850429                                        | 5.223550481                           | 0.00675573                                              |
| 0.605980274                                 | 0.010899241                                        | 6.595359707                           | 0.007820484                                             |
| 0.579410158                                 | 0.006857163                                        | 6.803232891                           | 0.004294068                                             |
| 0.581736901                                 | 0.007781941                                        | 6.506471393                           | 0.004439961                                             |
| 0.501453376                                 | 0.017035824                                        | 6.433766815                           | 0.011890616                                             |
| 0.528921647                                 | 0.014615699                                        | 6.6394866                             | 0.007141488                                             |
| 0.505744238                                 | 0.020481206                                        | 6.797040626                           | 0.009738668                                             |
| 0.559114477                                 | 0.010410422                                        | 6.455604947                           | 0.006385079                                             |
| 0.562197346                                 | 0.01361315                                         | 6.387309673                           | 0.008623761                                             |
| 0.559614388                                 | 0.007910559                                        | 6.69030964                            | 0.003597361                                             |
| 0.550141953                                 | 0.013785287                                        | 6.316305881                           | 0.004751655                                             |
| 0.556966244                                 | 0.013962014                                        | 6.677558112                           | 0.005889069                                             |
| 0.547894916                                 | 0.009512995                                        | 6.336647928                           | 0.004028368                                             |
| 0.522538692                                 | 0.014194961                                        | 6.541314851                           | 0.007651108                                             |
| 0.527118484                                 | 0.008965947                                        | 6.592286432                           | 0.005232837                                             |
| 0.542966046                                 | 0.016004152                                        | 6.603155421                           | 0.008765573                                             |
| 0.539895377                                 | 0.007761427                                        | 6.630018598                           | 0.003129519                                             |
| 0.507569893                                 | 0.014231063                                        | 6.03489239                            | 0.00502537                                              |
| 0.584057315                                 | 0.030276992                                        | 5.941753063                           | 0.010313841                                             |
| 0.597152349                                 | 0.012396554                                        | 6.205548937                           | 0.005675516                                             |
| 0.539323661                                 | 0.010052415                                        | 6.645528068                           | 0.005006789                                             |
| 0.574490529                                 | 0.015716988                                        | 6.163403028                           | 0.006027165                                             |
| 0.612021258                                 | 0.009348873                                        | 6.388731663                           | 0.006351114                                             |
| 0.546479639                                 | 0.01170623                                         | 6.615193938                           | 0.005400307                                             |
| 0.566040202                                 | 0.01081613                                         | 6.416207697                           | 0.005081348                                             |
| 0.543890756                                 | 0.007928758                                        | 6.864715613                           | 0.003514313                                             |
| 0.553151234                                 | 0.012175948                                        | 6.75004477                            | 0.005428627                                             |
| 0.588029835                                 | 0.034191282                                        | 5.180451391                           | 0.027611979                                             |
| 0.530850198                                 | 0.014337146                                        | 5.977632498                           | 0.010484405                                             |
| 0.558010079                                 | 0.011845435                                        | 6.680930718                           | 0.00695824                                              |
| 0.562654457                                 | 0.011868397                                        | 6.696450562                           | 0.005705588                                             |
| 0.505300526                                 | 0.01268492                                         | 6.712492729                           | 0.006827921                                             |
| 0.498188138                                 | 0.015081473                                        | 6.488287377                           | 0.00558962                                              |
| 0.602599346                                 | 0.014235668                                        | 6.299151406                           | 0.007034331                                             |
| 0.512192193                                 | 0.009112933                                        | 6.541640137                           | 0.005912239                                             |
| 0.604025204                                 | 0.010656946                                        | 6.425005482                           | 0.004767256                                             |
| 0.55712234                                  | 0.013865087                                        | 6.543801832                           | 0.007657986                                             |
| 0.582038753                                 | 0.011348783                                        | 6.553199302                           | 0.004862339                                             |
| 0.558270647                                 | 0.0140031                                          | 6.622135068                           | 0.008840402                                             |
| 0.554748428                                 | 0.016328118                                        | 6.20671712                            | 0.009457835                                             |
| 0.541158733                                 | 0.00853289                                         | 6.891253384                           | 0.004222404                                             |
| 0.59643517                                  | 0.014863111                                        | 6.017627571                           | 0.005131808                                             |
| 0.592670449                                 | 0.028086916                                        | 5.018323845                           | 0.008413923                                             |
| 0.61282047                                  | 0.013689598                                        | 6.305509414                           | 0.006045104                                             |
| 0.508204363                                 | 0.011464815                                        | 6.864592253                           | 0.006208478                                             |
| 0.58153049                                  | 0.017306849                                        | 6.185681676                           | 0.012278227                                             |
| 0.563042781                                 | 0.009481083                                        | 6.839163778                           | 0.005266864                                             |
| 0.503038839                                 | 0.017542398                                        | 6.179649367                           | 0.00559397                                              |
| 0.548422958                                 | 0.009797868                                        | 6.671467164                           | 0.004494358                                             |
| 0.593863237                                 | 0.012970519                                        | 6.494578429                           | 0.00743609                                              |
| 0.611013786                                 | 0.005987914                                        | 6.540461011                           | 0.00383154                                              |
| 0.571417834                                 | 0.006714191                                        | 6.668504392                           | 0.005085372                                             |
| 0.550909597                                 | 0.018287435                                        | 6.247715457                           | 0.006405488                                             |
| 0.483269442                                 | 0.015972815                                        | 6.303016354                           | 0.006895093                                             |
| 0.589882407                                 | 0.013751816                                        | 6.543908184                           | 0.00753921                                              |
| 0.55421081                                  | 0.00956211                                         | 6.9574063                             | 0.005712853                                             |
| 0.532934341                                 | 0.017036514                                        | 6.646610235                           | 0.009923666                                             |
| 0.487672978                                 | 0.008870762                                        | 6.549156647                           | 0.0051932                                               |
| 0.534461986                                 | 0.021524476                                        | 5.683238288                           | 0.007738967                                             |
| 0.573717464                                 | 0.014280445                                        | 6.602553244                           | 0.008979252                                             |
| 0.621751787                                 | 0.013206464                                        | 6.150891586                           | 0.005476509                                             |
| 0.564026446                                 | 0.010480685                                        | 6.783937967                           | 0.004897786                                             |
| 0.655927189                                 | 0.019094765                                        | 5.963022599                           | 0.014425095                                             |
| 0.565467705                                 | 0.020034088                                        | 6.576552595                           | 0.009568841                                             |
| 0.586542403                                 | 0.011253592                                        | 6.604265185                           | 0.004853513                                             |
| 0.546658529                                 | 0.012789947                                        | 6.552867347                           | 0.005721984                                             |
| 0.538904375                                 | 0.011204155                                        | 6.784785752                           | 0.005219351                                             |
| 0.531807089                                 | 0.006066267                                        | 6.666462951                           | 0.002706923                                             |
| 0.520056362                                 | 0.012141868                                        | 7.038284155                           | 0.006947819                                             |
| 0.623938289                                 | 0.008006251                                        | 6.511019697                           | 0.005066875                                             |
| 0.54492478                                  | 0.013012268                                        | 6.456084158                           | 0.007925863                                             |
| 0.566000559                                 | 0.020731536                                        | 6.273020148                           | 0.009811419                                             |
| 0.579517885                                 | 0.010523785                                        | 6.46919015                            | 0.004828866                                             |
| 0.533204058                                 | 0.006385108                                        | 6.629750892                           | 0.002612573                                             |
| 0.648648392                                 | 0.012676115                                        | 6.261651948                           | 0.009099264                                             |
| 0.608404276                                 | 0.01157886                                         | 6.378620288                           | 0.008424299                                             |
| 0.559667719                                 | 0.006094426                                        | 6.811212391                           | 0.003856346                                             |
| 0.547876994                                 | 0.032500559                                        | 5.265131208                           | 0.027530636                                             |
| 0.547278179                                 | 0.014585741                                        | 6.712976717                           | 0.006913647                                             |
| 0.530438942                                 | 0.009337902                                        | 6.776142118                           | 0.004696861                                             |
| 0.594235161                                 | 0.015156806                                        | 6.282382518                           | 0.005737749                                             |
| 0.623148998                                 | 0.004435266                                        | 6.540820748                           | 0.003162892                                             |
| 0.642035603                                 | 0.023281045                                        | 5.138839549                           | 0.020607253                                             |
| 0.625523125                                 | 0.040618712                                        | 4.924969207                           | 0.034915598                                             |
| 0.568384487                                 | 0.006435914                                        | 6.849838894                           | 0.003957361                                             |
| 0.644739561                                 | 0.021867382                                        | 6.052547145                           | 0.007195819                                             |
| 0.494745935                                 | 0.027741737                                        | 6.202835481                           | 0.012753764                                             |
| 0.531519654                                 | 0.010754031                                        | 6.800156906                           | 0.006449043                                             |
| 0.550396916                                 | 0.01760774                                         | 6.692163971                           | 0.008098599                                             |
| 0.661767719                                 | 0.01543858                                         | 5.911805528                           | 0.011500438                                             |
| 0.541343799                                 | 0.010823132                                        | 6.602056752                           | 0.007370409                                             |
| 0.597567954                                 | 0.036254455                                        | 5.038846943                           | 0.008839447                                             |
| 0.430591773                                 | 0.02492044                                         | 5.850381504                           | 0.007593935                                             |
| 0.671983712                                 | 0.011743229                                        | 6.177820592                           | 0.006339203                                             |

| log.sigma.4.5.mm.3D_ngtdm_Coarseness | log.sigma.4.5.mm.3D_ngtdm_Complexity | log.sigma.4.5.mm.3D_ngtdm_Strength | log.sigma.4.5.mm.3D_ngtdm_Busyness | log.sigma.4.5.mm.3D_ngtdm_Contrast |
|--------------------------------------|--------------------------------------|------------------------------------|------------------------------------|------------------------------------|
| 0.017593179                          | 1.30558875                           | 6.184437859                        | 0.116670217                        | 0.000227316                        |
| 0.006740637                          | 0.244446421                          | 1.800170866                        | 0.397371119                        | 4.04E-05                           |
| 0.025465341                          | 0.775197616                          | 4.014232415                        | 0.190899813                        | 0.000321675                        |
| 0.004778007                          | 0.336468707                          | 1.751597379                        | 0.314990379                        | 3.87E-05                           |
| 0.03373403                           | 2.077977001                          | 10.82273308                        | 0.058996767                        | 0.000572417                        |
| 0.016122115                          | 0.556168946                          | 2.592825192                        | 0.252482245                        | 0.00025457                         |
| 0.037520877                          | 0.491617176                          | 4.00778073                         | 0.202344471                        | 0.000342106                        |
| 0.011228831                          | 1.227899338                          | 4.515138844                        | 0.15002317                         | 0.000199649                        |
| 0.006047997                          | 0.553237871                          | 2.55288333                         | 0.260743898                        | 6.41E-05                           |
| 0.004076506                          | 0.20427178                           | 1.320392827                        | 0.551024734                        | 2.48E-05                           |
| 0.010684045                          | 0.765141973                          | 2.612198359                        | 0.244454775                        | 0.000207662                        |
| 0.009151262                          | 0.443146082                          | 2.854990375                        | 0.299882363                        | 7.57E-05                           |
| 0.006322061                          | 0.193656689                          | 1.387967475                        | 0.710727435                        | 6.51E-05                           |
| 0.010438885                          | 0.490901891                          | 2.595260423                        | 0.231413499                        | 0.000119138                        |
| 0.013822263                          | 0.685884727                          | 3.811692495                        | 0.182630799                        | 0.000124174                        |
| 0.002301441                          | 0.05921574                           | 0.971690887                        | 0.654243617                        | 3.45E-06                           |
| 0.01583761                           | 1.01656093                           | 4.427277548                        | 0.146398224                        | 0.000237456                        |
| 0.005356177                          | 0.312207393                          | 1.686163419                        | 0.62047553                         | 6.53E-05                           |
| 0.019387292                          | 1.612648122                          | 6.976511149                        | 0.078600323                        | 0.000326067                        |
| 0.004623068                          | 0.122647677                          | 0.960713524                        | 0.791914427                        | 2.68E-05                           |
| 0.002518413                          | 0.093605951                          | 0.84877525                         | 0.800859597                        | 7.52E-06                           |
| 0.006712568                          | 0.46130331                           | 2.627069613                        | 0.373222303                        | 5.76E-05                           |
| 0.004562352                          | 0.226068854                          | 1.532859323                        | 0.469085816                        | 2.71E-05                           |
| 0.024961069                          | 1.073325449                          | 5.750794155                        | 0.104099183                        | 0.00035362                         |
| 0.008962615                          | 0.217111215                          | 1.27507815                         | 0.699315947                        | 8.75E-05                           |
| 0.016541587                          | 1.179293609                          | 4.568281238                        | 0.159830478                        | 0.000233499                        |
| 0.004366494                          | 0.118659004                          | 1.446560154                        | 0.440750267                        | 1.06E-05                           |
| 0.008302169                          | 0.309462803                          | 1.889647305                        | 0.506468551                        | 8.10E-05                           |
| 0.005577601                          | 0.454213576                          | 1.644430019                        | 0.406312522                        | 0.000105611                        |
| 0.005603691                          | 0.228309665                          | 1.711198741                        | 0.37933332                         | 2.93E-05                           |
| 0.003605574                          | 0.146116414                          | 0.91528323                         | 0.90893296                         | 2.58E-05                           |
| 0.002213875                          | 0.123102922                          | 0.881005784                        | 0.931549099                        | 1.27E-05                           |
| 0.006308344                          | 0.36574676                           | 2.020163983                        | 0.352885047                        | 6.19E-05                           |
| 0.077707007                          | 4.463884866                          | 13.08522536                        | 0.060395336                        | 0.002602191                        |
| 0.029615335                          | 1.755055038                          | 7.331741119                        | 0.077176904                        | 0.000539563                        |
| 0.005441691                          | 0.38253686                           | 1.720055408                        | 0.406023865                        | 7.10E-05                           |
| 0.003959457                          | 0.316493388                          | 1.793233796                        | 0.683009579                        | 3.65E-05                           |
| 0.003773747                          | 0.103821298                          | 0.758257986                        | 0.907243251                        | 2.83E-05                           |
| 0.013688516                          | 0.702392757                          | 4.387680783                        | 0.126257482                        | 0.000116805                        |
| 0.010960282                          | 0.669898086                          | 3.007442759                        | 0.231345962                        | 0.000141695                        |
| 0.009689138                          | 0.467019145                          | 3.62169295                         | 0.179797853                        | 4.31E-05                           |
| 0.011559308                          | 1.00615436                           | 3.992437925                        | 0.182086472                        | 0.000201429                        |
| 0.006124207                          | 0.431168879                          | 1.665137035                        | 0.399601078                        | 0.000104047                        |
| 0.011466298                          | 0.960570163                          | 4.050263703                        | 0.172704919                        | 0.000173578                        |
| 0.006483808                          | 0.30949878                           | 1.670265074                        | 0.427476837                        | 6.63E-05                           |
| 0.004847954                          | 0.156168137                          | 1.133236714                        | 0.994321397                        | 3.29E-05                           |
| 0.003054342                          | 0.149654236                          | 0.931102522                        | 0.708031785                        | 2.06E-05                           |
| 0.017235702                          | 0.914839125                          | 3.714111259                        | 0.196639488                        | 0.000361487                        |
| 0.065335348                          | 3.216216997                          | 10.57903829                        | 0.055335559                        | 0.001617776                        |
| 0.022231589                          | 2.535982084                          | 11.34449921                        | 0.05128814                         | 0.00031089                         |
| 0.003798255                          | 0.165557742                          | 1.180710432                        | 0.660701635                        | 2.29E-05                           |
| 0.009570931                          | 0.659676221                          | 1.994168659                        | 0.369114443                        | 0.000353703                        |
| 0.003180019                          | 0.257001512                          | 1.355791238                        | 0.583599099                        | 2.42E-05                           |
| 0.020561212                          | 0.706414029                          | 4.204370191                        | 0.138815632                        | 0.000182552                        |
| 0.002197985                          | 0.0698806                            | 0.639625524                        | 1.100560583                        | 8.92E-06                           |
| 0.013187103                          | 1.080254284                          | 4.392336155                        | 0.14875923                         | 0.000189638                        |
| 0.004974079                          | 0.454589186                          | 1.647866135                        | 0.394436731                        | 7.60E-05                           |
| 0.008551489                          | 0.868804859                          | 4.204566376                        | 0.130245272                        | 8.21E-05                           |
| 0.015717743                          | 0.616475951                          | 3.822214962                        | 0.201439971                        | 0.000154361                        |
| 0.012109281                          | 0.378788932                          | 1.998458117                        | 0.331490076                        | 0.0001523                          |
| 0.005046235                          | 0.39405393                           | 1.678693532                        | 0.625144423                        | 7.94E-05                           |
| 0.002358177                          | 0.192686492                          | 1.168777497                        | 0.697032667                        | 1.63E-05                           |
| 0.004258539                          | 0.128230394                          | 1.163094772                        | 0.675372185                        | 1.63E-05                           |
| 0.004924533                          | 0.14413282                           | 1.143011974                        | 0.495814414                        | 2.05E-05                           |
| 0.04873983                           | 2.497937818                          | 9.738727269                        | 0.067660723                        | 0.001001496                        |
| 0.008597979                          | 0.455576656                          | 2.874791594                        | 0.276154546                        | 6.19E-05                           |
| 0.026545629                          | 2.468701339                          | 9.365784316                        | 0.063125705                        | 0.000481222                        |
| 0.003674941                          | 0.26689069                           | 1.179917953                        | 0.709921263                        | 5.30E-05                           |
| 0.021495516                          | 1.664059601                          | 5.957548936                        | 0.107883123                        | 0.000519038                        |
| 0.006199403                          | 0.270655726                          | 1.512281531                        | 0.608120522                        | 6.72E-05                           |
| 0.003841418                          | 0.272058105                          | 1.336309894                        | 0.686862717                        | 4.26E-05                           |
| 0.009402275                          | 0.748094163                          | 2.84405313                         | 0.288741798                        | 0.000177531                        |
| 0.002397428                          | 0.108757466                          | 0.712907677                        | 1.199327911                        | 1.58E-05                           |
| 0.001986697                          | 0.084822834                          | 0.670521946                        | 0.987837252                        | 7.46E-06                           |
| 0.001540182                          | 0.057129901                          | 0.558479374                        | 1.38465992                         | 5.81E-06                           |
| 0.009727505                          | 1.337856159                          | 4.913496948                        | 0.136772935                        | 0.000127938                        |
| 0.009704481                          | 0.718724757                          | 3.295523983                        | 0.24103203                         | 0.000106862                        |
| 0.017303679                          | 1.202739623                          | 4.337505017                        | 0.199194352                        | 0.000410252                        |
| 0.006006635                          | 0.434652072                          | 1.678101474                        | 0.483070918                        | 9.17E-05                           |
| 0.004186723                          | 0.233220039                          | 1.342822608                        | 0.487693001                        | 2.83E-05                           |
| 0.0194593                            | 2.654918926                          | 7.336869769                        | 0.094620249                        | 0.000544863                        |
| 0.007990807                          | 0.624022247                          | 2.541716819                        | 0.262356396                        | 0.000116121                        |
| 0.004951289                          | 0.293039583                          | 1.851621101                        | 0.337731995                        | 3.30E-05                           |
| 0.057501569                          | 2.124358348                          | 8.590599588                        | 0.064374306                        | 0.000927639                        |
| 0.003500212                          | 0.160189494                          | 0.930206992                        | 0.972669551                        | 3.00E-05                           |
| 0.002429714                          | 0.07792493                           | 0.645725999                        | 1.054176126                        | 1.12E-05                           |
| 0.014036922                          | 1.095531395                          | 4.371869898                        | 0.224688491                        | 0.000268891                        |
| 0.006392555                          | 0.944287428                          | 3.171972387                        | 0.177576372                        | 0.000124309                        |
| 0.054156456                          | 1.442452163                          | 7.713568412                        | 0.08347163                         | 0.001025324                        |
| 0.069208469                          | 4.153250604                          | 13.84079637                        | 0.059208373                        | 0.001920241                        |
| 0.003520264                          | 0.227300404                          | 1.440772221                        | 0.41449849                         | 1.94E-05                           |
| 0.014708261                          | 1.22772074                           | 4.546551953                        | 0.25516296                         | 0.000326123                        |
| 0.0131688                            | 0.214380133                          | 1.707767353                        | 0.474362958                        | 0.000103812                        |
| 0.003004863                          | 0.143073828                          | 0.931987317                        | 0.779814297                        | 1.81E-05                           |
| 0.002099872                          | 0.071426215                          | 0.482770654                        | 1.694841302                        | 1.58E-05                           |
| 0.035399862                          | 5.447014118                          | 16.87019609                        | 0.040790132                        | 0.001268621                        |
| 0.010993824                          | 0.49419611                           | 2.960010003                        | 0.189672572                        | 9.69E-05                           |
| 0.065224781                          | 2.695590516                          | 7.745740702                        | 0.099210139                        | 0.002271709                        |
| 0.032571673                          | 0.758728928                          | 5.610025149                        | 0.104680606                        | 0.000309124                        |
| 0.01648202                           | 1.198089297                          | 7.127385015                        | 0.111180246                        | 0.000142796                        |

| log.sigma.4.0.mm.3D_gldm_GrayLevelVariance | log.sigma.4.0.mm.3D_gldm_HighGrayLevelEmphasis | log.sigma.4.0.mm.3D_gldm_GrayLevelNonUniformityNormalized | log.sigma.4.0.mm.3D_gldm_DependenceEntropy |
|--------------------------------------------|------------------------------------------------|-----------------------------------------------------------|--------------------------------------------|
| 38.14571981                                | 307.4589235                                    | 0.047043151                                               | 6.566964565                                |
| 22.30369345                                | 209.033221                                     | 0.064789893                                               | 7.075428118                                |
| 22.51753594                                | 142.859447                                     | 0.061001508                                               | 6.183753383                                |
| 31.25976992                                | 366.8098672                                    | 0.049565008                                               | 6.893589476                                |
| 45.6371071                                 | 370.6406685                                    | 0.044824295                                               | 6.454579643                                |
| 21.34370624                                | 173.1353033                                    | 0.060106567                                               | 6.327301191                                |
| 14.97181449                                | 109.2403561                                    | 0.078392871                                               | 6.178403169                                |
| 48.23155685                                | 352.1457086                                    | 0.040744858                                               | 6.680013515                                |
| 41.26843552                                | 371.3573834                                    | 0.043600299                                               | 6.978062171                                |
| 21.99004377                                | 223.3221433                                    | 0.062853187                                               | 6.874577485                                |
| 25.68706108                                | 203.6045949                                    | 0.058337927                                               | 6.318265692                                |
| 30.12638937                                | 207.7962213                                    | 0.05184572                                                | 6.873939607                                |
| 26.4263225                                 | 163.1832208                                    | 0.056002637                                               | 6.819293636                                |
| 27.85666088                                | 207.1243292                                    | 0.053214435                                               | 6.522487321                                |
| 25.84725775                                | 185.3106476                                    | 0.056890957                                               | 6.540327963                                |
| 12.50638782                                | 202.1224989                                    | 0.118068908                                               | 7.130003343                                |
| 34.6138558                                 | 269.3882521                                    | 0.048784493                                               | 6.487678649                                |
| 34.37380788                                | 200.7860206                                    | 0.048720318                                               | 6.95200096                                 |
| 45.36257543                                | 365.7233677                                    | 0.043409974                                               | 6.657563989                                |
| 16.29131509                                | 114.372724                                     | 0.074174432                                               | 6.990606106                                |
| 14.00816437                                | 201.9090735                                    | 0.07943855                                                | 6.956013091                                |
| 27.66871282                                | 185.3755814                                    | 0.054019064                                               | 6.646049438                                |
| 22.14331916                                | 201.9055291                                    | 0.063905595                                               | 6.699073655                                |
| 31.93813996                                | 360.2182952                                    | 0.051940474                                               | 6.508383966                                |
| 15.0043239                                 | 96.87375415                                    | 0.074047196                                               | 6.513707409                                |
| 33.59639437                                | 217.79683                                      | 0.049838467                                               | 6.525989458                                |
| 14.5105476                                 | 240.3075591                                    | 0.091773053                                               | 7.059838757                                |
| 22.64511668                                | 145.2470342                                    | 0.060896844                                               | 6.690794083                                |
| 36.63779791                                | 271.9342776                                    | 0.046886822                                               | 6.692382512                                |
| 22.53687646                                | 223.8485445                                    | 0.063057394                                               | 7.192500126                                |
| 18.45742185                                | 156.6067946                                    | 0.068933918                                               | 6.692034073                                |
| 24.22641045                                | 221.2807757                                    | 0.060402617                                               | 7.10497004                                 |
| 32.98619797                                | 236.2695524                                    | 0.048329228                                               | 6.86602231                                 |
| 33.16188979                                | 246.4903846                                    | 0.057507396                                               | 5.281948916                                |
| 33.71028996                                | 365.4548193                                    | 0.052347946                                               | 6.156721701                                |
| 32.19524434                                | 272.9826733                                    | 0.049068719                                               | 6.78006942                                 |
| 29.52773329                                | 182.1274306                                    | 0.053978347                                               | 6.859391514                                |
| 19.62747042                                | 149.2573047                                    | 0.063228022                                               | 6.920165267                                |
| 25.12655169                                | 273.3305389                                    | 0.066295672                                               | 6.585970958                                |
| 30.80012286                                | 228.6730219                                    | 0.052441792                                               | 6.601266407                                |
| 22.23546815                                | 263.9810041                                    | 0.062753029                                               | 6.913411804                                |
| 41.54711966                                | 305.1920252                                    | 0.044636202                                               | 6.57645911                                 |
| 31.44208475                                | 252.7484775                                    | 0.050509539                                               | 6.586924273                                |
| 42.35258441                                | 292.0234146                                    | 0.043388459                                               | 6.759514311                                |
| 26.89589366                                | 282.3679446                                    | 0.054150916                                               | 6.737939987                                |
| 14.14006814                                | 100.8940754                                    | 0.080273023                                               | 6.655903963                                |
| 25.21378978                                | 243.1256446                                    | 0.055373345                                               | 6.856578924                                |
| 30.77200498                                | 189.4974271                                    | 0.053290927                                               | 6.44217235                                 |
| 29.39368456                                | 299.1865672                                    | 0.062708844                                               | 5.637245743                                |
| 46.99508115                                | 474.0784708                                    | 0.052002154                                               | 6.455496957                                |
| 21.9265212                                 | 191.2683995                                    | 0.061623832                                               | 6.948237911                                |
| 33.08610397                                | 203.8512696                                    | 0.054264405                                               | 6.363200004                                |
| 28.73503342                                | 250.3014918                                    | 0.053598548                                               | 7.049881497                                |
| 21.0791025                                 | 177.3079526                                    | 0.064254855                                               | 6.371846393                                |
| 18.06982653                                | 171.1303081                                    | 0.086960516                                               | 7.097415707                                |
| 39.53798983                                | 287.3765643                                    | 0.044417783                                               | 6.563465107                                |
| 40.41771054                                | 358.7952576                                    | 0.04290961                                                | 6.786648807                                |
| 34.47637556                                | 431.3271462                                    | 0.054500735                                               | 6.729698886                                |
| 27.47108042                                | 206.4520885                                    | 0.053631474                                               | 6.587566185                                |
| 18.77700374                                | 147.1271283                                    | 0.063423697                                               | 6.395205886                                |
| 34.91563888                                | 206.3043889                                    | 0.049288879                                               | 6.736783339                                |
| 32.42909892                                | 278.9729828                                    | 0.050184275                                               | 7.19051337                                 |
| 14.09992103                                | 157.6187702                                    | 0.084404436                                               | 6.863323536                                |
| 15.00597008                                | 202.8495057                                    | 0.082147941                                               | 7.035456974                                |
| 31.2549003                                 | 268.5852535                                    | 0.052177791                                               | 5.95747451                                 |
| 28.92159371                                | 249.787508                                     | 0.054946723                                               | 6.864250956                                |
| 39.74467263                                | 360.8274112                                    | 0.052204386                                               | 6.278998367                                |
| 38.17219674                                | 215.8526744                                    | 0.045524087                                               | 7.0462027                                  |
| 35.93834529                                | 228.3139013                                    | 0.050554003                                               | 6.23118262                                 |
| 28.77095517                                | 197.3187469                                    | 0.05319549                                                | 6.711034956                                |
| 32.1140295                                 | 250.4049342                                    | 0.050735587                                               | 6.9857443                                  |
| 37.8249515                                 | 225.6775908                                    | 0.045554003                                               | 6.670346583                                |
| 20.65581714                                | 161.5106424                                    | 0.065230545                                               | 6.99478977                                 |
| 17.16439341                                | 253.2048839                                    | 0.069800599                                               | 7.047529595                                |
| 18.9988772                                 | 191.8125272                                    | 0.078724327                                               | 7.134489379                                |
| 43.09970003                                | 350.7311828                                    | 0.043482869                                               | 6.686562134                                |
| 27.89051919                                | 223.4395703                                    | 0.053207971                                               | 6.546223281                                |
| 38.73787691                                | 181.4032787                                    | 0.045267401                                               | 6.417424703                                |
| 32.36859642                                | 270.1995465                                    | 0.049088343                                               | 6.810938669                                |
| 23.41393464                                | 245.3988053                                    | 0.058097099                                               | 6.716285563                                |
| 54.07015306                                | 359.0714286                                    | 0.038044848                                               | 6.47530946                                 |
| 37.17948641                                | 340.1886652                                    | 0.045371663                                               | 6.621191462                                |
| 29.92180278                                | 333.6697708                                    | 0.053033483                                               | 6.97054147                                 |
| 21.38387634                                | 250.9586207                                    | 0.077384067                                               | 5.562552111                                |
| 22.89995453                                | 158.1751696                                    | 0.058866858                                               | 6.756736023                                |
| 17.22956646                                | 222.646092                                     | 0.074485596                                               | 7.032295242                                |
| 39.84456883                                | 226.8097686                                    | 0.0453407                                                 | 6.468631446                                |
| 48.4767705                                 | 510.9761598                                    | 0.042513318                                               | 6.660950231                                |
| 19.6889725                                 | 192.9781421                                    | 0.071934068                                               | 5.780338741                                |
| 25.12979592                                | 186.0571429                                    | 0.068480726                                               | 5.34364168                                 |
| 28.23704721                                | 288.5539623                                    | 0.058125739                                               | 7.151293025                                |
| 40.76903956                                | 188.8427762                                    | 0.04540603                                                | 6.477464751                                |
| 17.61568775                                | 138.0136986                                    | 0.068989089                                               | 6.859205617                                |
| 20.4255463                                 | 176.6266504                                    | 0.063980129                                               | 6.976299114                                |
| 19.22620028                                | 142.1854978                                    | 0.065751822                                               | 6.979068068                                |
| 72.30530082                                | 452.3241107                                    | 0.03722914                                                | 6.148513364                                |
| 28.58847426                                | 314.6044408                                    | 0.053552686                                               | 6.747575945                                |
| 28.6802829                                 | 190.9837398                                    | 0.055324212                                               | 5.452291083                                |
| 20.96259425                                | 195.7044855                                    | 0.065726359                                               | 6.030407786                                |
| 36.21130167                                | 343.8289963                                    | 0.049924069                                               | 6.859137469                                |

| log.sigma.4.0.mm.3D_gldm_DependenceNonUniformity | log.sigma.4.0.mm.3D_gldm_GrayLevelNonUniformity | log.sigma.4.0.mm.3D_gldm_SmallDependenceEmphasis |
|--------------------------------------------------|-------------------------------------------------|--------------------------------------------------|
| 162.5212465                                      | 33.21246459                                     | 0.326285338                                      |
| 280.7640828                                      | 134.5686086                                     | 0.23097425                                       |
| 93.88479263                                      | 26.47465438                                     | 0.306310654                                      |
| 542.6675522                                      | 130.6037951                                     | 0.294362981                                      |
| 85.60167131                                      | 16.09192201                                     | 0.369285004                                      |
| 140.3685848                                      | 38.64852255                                     | 0.272734348                                      |
| 56.91691395                                      | 26.41839763                                     | 0.209901046                                      |
| 262.3572854                                      | 40.82634731                                     | 0.365887782                                      |
| 452.7431457                                      | 90.64502165                                     | 0.32967972                                       |
| 507.3111685                                      | 194.7191737                                     | 0.246600352                                      |
| 194.5066505                                      | 48.24546554                                     | 0.284828993                                      |
| 282.1079622                                      | 76.83535762                                     | 0.276454714                                      |
| 393.6422372                                      | 116.1494696                                     | 0.208112845                                      |
| 252.5760286                                      | 59.49373882                                     | 0.278216749                                      |
| 188.4796926                                      | 51.82766191                                     | 0.284029626                                      |
| 553.8351807                                      | 820.2247013                                     | 0.127666199                                      |
| 171.3323782                                      | 34.05157593                                     | 0.365662073                                      |
| 448.0308748                                      | 113.6157804                                     | 0.273563413                                      |
| 143.3367698                                      | 25.26460481                                     | 0.355454791                                      |
| 371.9689397                                      | 207.7625848                                     | 0.190744891                                      |
| 664.7936447                                      | 414.9869832                                     | 0.186070506                                      |
| 366.0093023                                      | 92.9127907                                      | 0.27423342                                       |
| 497.9022336                                      | 174.5261809                                     | 0.265526138                                      |
| 105.1122661                                      | 24.98336798                                     | 0.341222463                                      |
| 193.5431894                                      | 89.15282392                                     | 0.268236856                                      |
| 155.0662824                                      | 34.58789625                                     | 0.331179713                                      |
| 368.1534911                                      | 318.085401                                      | 0.161520859                                      |
| 244.1570133                                      | 87.26517795                                     | 0.277220349                                      |
| 416.2339943                                      | 82.75524079                                     | 0.359414118                                      |
| 331.945712                                       | 160.2918961                                     | 0.214201566                                      |
| 509.4397609                                      | 219.1409248                                     | 0.248956666                                      |
| 936.022597                                       | 358.1875211                                     | 0.236367847                                      |
| 428.559272                                       | 98.25332022                                     | 0.2842963                                        |
| 32.75                                            | 5.980769231                                     | 0.437032585                                      |
| 89.9939759                                       | 17.37951807                                     | 0.35790328                                       |
| 432.1168317                                      | 99.11881188                                     | 0.288327752                                      |
| 525.6736111                                      | 155.4576389                                     | 0.277484366                                      |
| 535.5802027                                      | 212.0667859                                     | 0.202680349                                      |
| 154.439521                                       | 55.35688623                                     | 0.230721115                                      |
| 227.7264061                                      | 55.01143947                                     | 0.326531732                                      |
| 227.5848033                                      | 92.49796472                                     | 0.21894345                                       |
| 235.1406086                                      | 42.5383001                                      | 0.338593862                                      |
| 385.7965895                                      | 82.93666261                                     | 0.3222999                                        |
| 236.3580488                                      | 44.47317073                                     | 0.337116609                                      |
| 389.1352503                                      | 101.6954207                                     | 0.277009039                                      |
| 298.0834829                                      | 178.8482944                                     | 0.202685829                                      |
| 817.0056259                                      | 236.222691                                      | 0.259890551                                      |
| 129.6895369                                      | 31.06861063                                     | 0.328289305                                      |
| 35.11940299                                      | 8.402985075                                     | 0.327844113                                      |
| 117.5875252                                      | 25.84507042                                     | 0.364456778                                      |
| 576.4591121                                      | 211                                             | 0.22872451                                       |
| 183.7811366                                      | 44.87666264                                     | 0.314849998                                      |
| 679.6637006                                      | 204.8000523                                     | 0.276770784                                      |
| 109.5820643                                      | 37.97461929                                     | 0.233927148                                      |
| 714.5600184                                      | 567.2434463                                     | 0.182533761                                      |
| 230.519909                                       | 39.04323094                                     | 0.379302199                                      |
| 528.1390789                                      | 94.10077519                                     | 0.364390228                                      |
| 277.6821346                                      | 70.46945089                                     | 0.31015844                                       |
| 159.9115479                                      | 43.65601966                                     | 0.289513522                                      |
| 180.5800227                                      | 55.87627696                                     | 0.230447468                                      |
| 434.38084                                        | 104.4431336                                     | 0.296920411                                      |
| 977.0543994                                      | 274.909456                                      | 0.279325263                                      |
| 404.3016181                                      | 260.8097087                                     | 0.192325047                                      |
| 302.0377151                                      | 224.3460271                                     | 0.16953112                                       |
| 62.29032258                                      | 11.32258065                                     | 0.394937877                                      |
| 292.7256922                                      | 85.33226014                                     | 0.290010708                                      |
| 93.73096447                                      | 20.56852792                                     | 0.401861914                                      |
| 628.6984673                                      | 145.5405067                                     | 0.303955687                                      |
| 115.5964126                                      | 22.5470852                                      | 0.3749623                                        |
| 419.9955246                                      | 106.9761313                                     | 0.305108611                                      |
| 573.7657895                                      | 154.2361842                                     | 0.289900942                                      |
| 260.8547387                                      | 51.43046944                                     | 0.321213349                                      |
| 757.5673375                                      | 337.1114551                                     | 0.22346899                                       |
| 893.6804646                                      | 468.7808219                                     | 0.189848691                                      |
| 1131.896732                                      | 722.6893246                                     | 0.195475279                                      |
| 276.6326165                                      | 48.52688172                                     | 0.36818396                                       |
| 245.6445837                                      | 59.43330349                                     | 0.291762351                                      |
| 155.7868852                                      | 27.61311475                                     | 0.374095814                                      |
| 365.0725624                                      | 86.59183673                                     | 0.304888276                                      |
| 542.4539705                                      | 165.3443429                                     | 0.267244822                                      |
| 147.515873                                       | 19.17460317                                     | 0.45538966                                       |
| 331.2878449                                      | 60.84340045                                     | 0.388574486                                      |
| 520.3459885                                      | 148.0694842                                     | 0.280068831                                      |
| 36.31034483                                      | 11.22068966                                     | 0.353832317                                      |
| 632.0728399                                      | 199.617517                                      | 0.249941381                                      |
| 749.47626                                        | 407.8831264                                     | 0.189963549                                      |
| 191.2262211                                      | 35.27506427                                     | 0.358309579                                      |
| 420.5554124                                      | 65.9806701                                      | 0.388088751                                      |
| 35.86338798                                      | 13.16393443                                     | 0.33131871                                       |
| 25.78095238                                      | 7.19047619                                      | 0.405690476                                      |
| 619.9444025                                      | 231.0498113                                     | 0.24814907                                       |
| 171.4645892                                      | 32.05665722                                     | 0.37276095                                       |
| 142.8336595                                      | 70.50684932                                     | 0.229107822                                      |
| 646.0841076                                      | 261.6787286                                     | 0.220570187                                      |
| 849.0310024                                      | 381.755081                                      | 0.207653202                                      |
| 82.34387352                                      | 9.418972332                                     | 0.412687747                                      |
| 239.3601974                                      | 65.12006579                                     | 0.274837935                                      |
| 33.22764228                                      | 6.804878049                                     | 0.42515131                                       |
| 85.78627968                                      | 24.91029024                                     | 0.229217358                                      |
| 148.6158612                                      | 40.28872367                                     | 0.320887019                                      |

| log.sigma.4.0.mm.3D_gldm_DependenceNonUniformityNormalized | log.sigma.4.0.mm.3D_gldm_DependenceVariance | log.sigma.4.0.mm.3D_gldm_LargeDependenceEmphasis |
|------------------------------------------------------------|---------------------------------------------|--------------------------------------------------|
| 0.230200066                                                | 1.641935976                                 | 8.478753541                                      |
| 0.1351777                                                  | 8.559552556                                 | 25.44583534                                      |
| 0.216324407                                                | 2.192720168                                 | 9.940092166                                      |
| 0.20594594                                                 | 2.870321212                                 | 11.37191651                                      |
| 0.238444767                                                | 1.630760159                                 | 7.735376045                                      |
| 0.21830262                                                 | 1.677280632                                 | 9.66251944                                       |
| 0.16889292                                                 | 2.706971092                                 | 14.94658754                                      |
| 0.261833618                                                | 1.292321545                                 | 6.934131737                                      |
| 0.217769671                                                | 2.409768451                                 | 9.85040885                                       |
| 0.163754412                                                | 4.393669087                                 | 16.42995481                                      |
| 0.235195466                                                | 1.626531409                                 | 9.048367594                                      |
| 0.19035625                                                 | 2.830795456                                 | 12.17408907                                      |
| 0.189798571                                                | 2.941820901                                 | 14.2487946                                       |
| 0.225917736                                                | 1.850013281                                 | 9.677996422                                      |
| 0.206893186                                                | 2.410817415                                 | 10.86608123                                      |
| 0.079722928                                                | 20.42960279                                 | 62.05225277                                      |
| 0.24546186                                                 | 1.556645676                                 | 7.544412607                                      |
| 0.192123017                                                | 3.409648444                                 | 13.03773585                                      |
| 0.24628311                                                 | 1.502993588                                 | 7.573883162                                      |
| 0.132798622                                                | 10.2475925                                  | 29.32774009                                      |
| 0.127257589                                                | 9.632773786                                 | 29.29785605                                      |
| 0.212796106                                                | 1.936554895                                 | 10.19883721                                      |
| 0.182314989                                                | 3.197306486                                 | 13.24093739                                      |
| 0.21852862                                                 | 2.246765877                                 | 9.428274428                                      |
| 0.160750157                                                | 3.645067383                                 | 14.96013289                                      |
| 0.223438447                                                | 2.000548132                                 | 9.060518732                                      |
| 0.106218549                                                | 19.87444831                                 | 49.54645124                                      |
| 0.170381726                                                | 4.085620132                                 | 14.88415911                                      |
| 0.235826626                                                | 1.88757345                                  | 8.292917847                                      |
| 0.130584466                                                | 10.42886679                                 | 29.3729347                                       |
| 0.160251576                                                | 3.957011059                                 | 15.87134319                                      |
| 0.157845295                                                | 7.200387318                                 | 21.11467116                                      |
| 0.210801413                                                | 2.222950437                                 | 10.47761928                                      |
| 0.314903846                                                | 0.74852071                                  | 4.903846154                                      |
| 0.271066192                                                | 1.262556249                                 | 6.86746988                                       |
| 0.213919224                                                | 2.022109597                                 | 10.00693069                                      |
| 0.182525559                                                | 3.216572145                                 | 13.04305556                                      |
| 0.15968402                                                 | 4.644946591                                 | 18.40608229                                      |
| 0.18495751                                                 | 2.806089856                                 | 13.44071856                                      |
| 0.217089043                                                | 2.474316181                                 | 10.04861773                                      |
| 0.154399459                                                | 4.981602411                                 | 18.75305292                                      |
| 0.24673726                                                 | 1.58659956                                  | 7.912906611                                      |
| 0.234955292                                                | 1.648411595                                 | 8.429963459                                      |
| 0.230593218                                                | 1.734887329                                 | 8.434146341                                      |
| 0.207207269                                                | 2.52610066                                  | 11.19062833                                      |
| 0.133789714                                                | 5.973298866                                 | 22.5529623                                       |
| 0.191515618                                                | 2.813827714                                 | 12.44913268                                      |
| 0.22452036                                                 | 2.566479056                                 | 10.03259005                                      |
| 0.262085097                                                | 1.32412564                                  | 7.462686567                                      |
| 0.236594618                                                | 1.779149748                                 | 8.054325956                                      |
| 0.168358386                                                | 7.639499083                                 | 21.1296729                                       |
| 0.222226284                                                | 1.948228544                                 | 9.278113664                                      |
| 0.17787587                                                 | 5.291446921                                 | 16.28133996                                      |
| 0.185418044                                                | 2.615704834                                 | 13.11505922                                      |
| 0.109544691                                                | 10.69310558                                 | 34.15682968                                      |
| 0.262252456                                                | 1.264268917                                 | 6.740614334                                      |
| 0.240829493                                                | 1.586830293                                 | 7.674874601                                      |
| 0.214758031                                                | 2.509579513                                 | 10.37819026                                      |
| 0.196451533                                                | 2.746632941                                 | 11.64373464                                      |
| 0.204971649                                                | 2.40533343                                  | 12.08513053                                      |
| 0.204993318                                                | 2.381361381                                 | 10.63850873                                      |
| 0.178359693                                                | 4.547882126                                 | 15.1347207                                       |
| 0.130841948                                                | 8.429103172                                 | 26.98317152                                      |
| 0.110596014                                                | 11.87112396                                 | 36.49176126                                      |
| 0.287052178                                                | 1.26755179                                  | 6.34562212                                       |
| 0.188490465                                                | 3.72199374                                  | 13.37475853                                      |
| 0.237895849                                                | 1.614367801                                 | 7.47715736                                       |
| 0.196652633                                                | 3.428487314                                 | 12.31623397                                      |
| 0.259184782                                                | 1.287055843                                 | 6.829596413                                      |
| 0.208849092                                                | 2.305860285                                 | 10.29189458                                      |
| 0.188738747                                                | 4.06117339                                  | 13.84736842                                      |
| 0.23104937                                                 | 1.660991605                                 | 8.539415412                                      |
| 0.146588107                                                | 6.223886545                                 | 20.99458204                                      |
| 0.133067371                                                | 8.48572378                                  | 26.81625968                                      |
| 0.123300298                                                | 9.787472767                                 | 30.03747277                                      |
| 0.247878689                                                | 1.457323262                                 | 7.327956989                                      |
| 0.219914578                                                | 2.075775293                                 | 9.882721576                                      |
| 0.255388336                                                | 1.399613007                                 | 7.06557377                                       |
| 0.206957235                                                | 2.734728585                                 | 10.99546485                                      |
| 0.190602238                                                | 2.708819914                                 | 12.17427969                                      |
| 0.292690224                                                | 1.055870496                                 | 5.412698413                                      |
| 0.247045373                                                | 1.470752346                                 | 7.140193885                                      |
| 0.18637034                                                 | 3.337558292                                 | 13.00716332                                      |
| 0.250416171                                                | 1.628727705                                 | 7.75862069                                       |
| 0.186397181                                                | 3.064126675                                 | 13.23591861                                      |
| 0.136865643                                                | 7.294576613                                 | 24.72169467                                      |
| 0.245792058                                                | 1.549566815                                 | 7.627249357                                      |
| 0.270976425                                                | 1.180663128                                 | 6.389175258                                      |
| 0.195974798                                                | 3.22912001                                  | 11.77595628                                      |
| 0.24553288                                                 | 1.604897959                                 | 7.228571429                                      |
| 0.155960856                                                | 8.705626771                                 | 23.2490566                                       |
| 0.24286769                                                 | 1.926714764                                 | 8.084985836                                      |
| 0.139758962                                                | 8.106770424                                 | 24.34246575                                      |
| 0.157966774                                                | 6.338017109                                 | 20.35745721                                      |
| 0.14623338                                                 | 6.277872713                                 | 21.72063383                                      |
| 0.325469856                                                | 0.811292162                                 | 5.150197628                                      |
| 0.196842268                                                | 2.524671053                                 | 11.52467105                                      |
| 0.270143433                                                | 1.1375504                                   | 5.991869919                                      |
| 0.226349023                                                | 1.66126663                                  | 10.47229551                                      |
| 0.18415844                                                 | 3.412338445                                 | 12.51672862                                      |



| log.sigma.4.0.mm.3D_gldm_LargeDependenceLowGrayLevelEmphasis | log.sigma.4.0.mm.3D_gldm_SmallDependenceHighGrayLevelEmphasis | log.sigma.4.0.mm.3D_gldm_LargeDependenceHighGrayLevelEmphasis |
|--------------------------------------------------------------|---------------------------------------------------------------|---------------------------------------------------------------|
| 0.074442935                                                  | 121.0198586                                                   | 2144.243626                                                   |
| 0.195156141                                                  | 61.14631584                                                   | 4764.700048                                                   |
| 0.289044786                                                  | 56.38189179                                                   | 1030.476959                                                   |
| 0.04806135                                                   | 109.3426987                                                   | 3984.239848                                                   |
| 0.063795154                                                  | 136.9408757                                                   | 2876.740947                                                   |
| 0.155851091                                                  | 54.13469107                                                   | 1483.617418                                                   |
| 0.396291284                                                  | 29.80474496                                                   | 1349.970326                                                   |
| 0.058614569                                                  | 148.5950773                                                   | 2183.39521                                                    |
| 0.052907986                                                  | 137.1258199                                                   | 3178.506975                                                   |
| 0.13161755                                                   | 70.30014392                                                   | 2892.404132                                                   |
| 0.122442217                                                  | 57.37896585                                                   | 1843.71584                                                    |
| 0.192674241                                                  | 68.16520382                                                   | 2035.180837                                                   |
| 0.243728252                                                  | 39.94827522                                                   | 2108.913211                                                   |
| 0.221869961                                                  | 60.72289793                                                   | 1874.931127                                                   |
| 0.138392598                                                  | 58.1933955                                                    | 1736.463227                                                   |
| 0.380088759                                                  | 30.76822173                                                   | 11339.62185                                                   |
| 0.085645433                                                  | 105.4724293                                                   | 2120.786533                                                   |
| 0.250051601                                                  | 71.47576569                                                   | 1808.641938                                                   |
| 0.072218192                                                  | 136.7568474                                                   | 2734.833333                                                   |
| 0.634854772                                                  | 29.452211                                                     | 2812.224206                                                   |
| 0.196111459                                                  | 47.45476255                                                   | 5289.116194                                                   |
| 0.168031526                                                  | 60.80147539                                                   | 1672.716279                                                   |
| 0.150841715                                                  | 67.70620294                                                   | 2082.071769                                                   |
| 0.050456078                                                  | 118.3095704                                                   | 3610.887734                                                   |
| 0.537332831                                                  | 34.91130538                                                   | 1092.818937                                                   |
| 0.147362266                                                  | 94.91222304                                                   | 1501.018732                                                   |
| 0.242982694                                                  | 47.37673784                                                   | 10949.48702                                                   |
| 0.343026855                                                  | 54.92752288                                                   | 1402.511514                                                   |
| 0.086728011                                                  | 94.9502659                                                    | 2499.270255                                                   |
| 0.179906834                                                  | 59.15424843                                                   | 6692.459874                                                   |
| 0.240649016                                                  | 50.01950665                                                   | 1787.480654                                                   |
| 0.187015737                                                  | 62.04136545                                                   | 3826.407589                                                   |
| 0.1302813                                                    | 69.88313921                                                   | 2418.176094                                                   |
| 0.057213726                                                  | 110.6077057                                                   | 1258.163462                                                   |
| 0.037045606                                                  | 137.5390629                                                   | 2430.35241                                                    |
| 0.073853711                                                  | 81.79948796                                                   | 2681.381683                                                   |
| 0.19550014                                                   | 64.9380134                                                    | 1819.612847                                                   |
| 0.330602346                                                  | 33.77726886                                                   | 2570.018187                                                   |
| 0.14318037                                                   | 69.21893555                                                   | 3673.977246                                                   |
| 0.125845786                                                  | 83.63841201                                                   | 2048.817922                                                   |
| 0.106892001                                                  | 68.34059664                                                   | 4424.87924                                                    |
| 0.08562769                                                   | 114.6266137                                                   | 2133.332634                                                   |
| 0.085213668                                                  | 83.54847725                                                   | 2153.793544                                                   |
| 0.127059561                                                  | 109.5141947                                                   | 2138.997073                                                   |
| 0.064397261                                                  | 85.86775603                                                   | 2891.940895                                                   |
| 0.543280552                                                  | 29.40443048                                                   | 1492.085278                                                   |
| 0.08892813                                                   | 69.22620977                                                   | 2857.816669                                                   |
| 0.305439627                                                  | 67.11270135                                                   | 1565.343053                                                   |
| 0.111219846                                                  | 104.3363329                                                   | 2013.365672                                                   |
| 0.053352477                                                  | 173.4952532                                                   | 3896.95171                                                    |
| 0.191220773                                                  | 52.22376062                                                   | 3527.265479                                                   |
| 0.226998881                                                  | 63.24372673                                                   | 1759.348247                                                   |
| 0.117497382                                                  | 79.75376358                                                   | 3487.949228                                                   |
| 0.806833773                                                  | 48.49150968                                                   | 2056.708968                                                   |
| 0.321831784                                                  | 38.71150758                                                   | 5133.127242                                                   |
| 0.073542694                                                  | 116.0893664                                                   | 1768.951081                                                   |
| 0.044856519                                                  | 140.0164463                                                   | 2534.77793                                                    |
| 0.036633341                                                  | 130.1812541                                                   | 4632.750193                                                   |
| 0.143576615                                                  | 72.11127912                                                   | 1945.611794                                                   |
| 0.303118446                                                  | 37.50268874                                                   | 1519.279228                                                   |
| 0.197657589                                                  | 77.57752027                                                   | 1499.739972                                                   |
| 0.097636714                                                  | 83.48317024                                                   | 3906.119387                                                   |
| 0.251557213                                                  | 35.84019211                                                   | 3751.986408                                                   |
| 0.223215499                                                  | 41.142997                                                     | 6974.659832                                                   |
| 0.063838553                                                  | 114.2861772                                                   | 1491.460829                                                   |
| 0.097297205                                                  | 86.85524754                                                   | 2913.371539                                                   |
| 0.223761066                                                  | 173.4197463                                                   | 2333.055838                                                   |
| 0.258500841                                                  | 76.47199227                                                   | 2150.821708                                                   |
| 0.374674744                                                  | 91.70353776                                                   | 1386.838565                                                   |
| 0.137484078                                                  | 73.79679826                                                   | 1629.699652                                                   |
| 0.14102258                                                   | 87.17469632                                                   | 2660.945724                                                   |
| 0.188358896                                                  | 85.75029489                                                   | 1536.418069                                                   |
| 0.258604183                                                  | 47.16017373                                                   | 2834.622485                                                   |
| 0.147115681                                                  | 58.70965586                                                   | 6120.774866                                                   |
| 0.211912134                                                  | 41.94940185                                                   | 5293.750436                                                   |
| 0.058167058                                                  | 140.8075934                                                   | 2409.600358                                                   |
| 0.108061559                                                  | 73.8109436                                                    | 1868.354521                                                   |
| 0.528822189                                                  | 84.49585788                                                   | 901.2                                                         |
| 0.101337926                                                  | 90.58725203                                                   | 2346.935374                                                   |
| 0.097398213                                                  | 76.92299613                                                   | 2475.712228                                                   |
| 0.063494553                                                  | 186.0984584                                                   | 1578.484127                                                   |
| 0.048408192                                                  | 132.3342605                                                   | 2310.873229                                                   |
| 0.057517721                                                  | 100.0287872                                                   | 4120.206304                                                   |
| 0.050075954                                                  | 82.95263527                                                   | 1969.041379                                                   |
| 0.234183995                                                  | 48.40524672                                                   | 1661.71041                                                    |
| 0.155970032                                                  | 50.52374327                                                   | 4759.321768                                                   |
| 0.168576284                                                  | 95.69859322                                                   | 1251.44473                                                    |
| 0.029399565                                                  | 196.6504583                                                   | 3215.125644                                                   |
| 0.104519533                                                  | 69.23778761                                                   | 2030.005464                                                   |
| 0.169317728                                                  | 90.81193915                                                   | 941.7904762                                                   |
| 0.121878854                                                  | 83.53112561                                                   | 6087.60805                                                    |
| 0.370598146                                                  | 89.78611884                                                   | 1016.103399                                                   |
| 0.303478602                                                  | 35.25007569                                                   | 3153.968689                                                   |
| 0.203305419                                                  | 44.92594973                                                   | 3445.201222                                                   |
| 0.323760465                                                  | 36.39742685                                                   | 2845.536858                                                   |
| 0.088137839                                                  | 180.5192677                                                   | 2319.193676                                                   |
| 0.067316125                                                  | 86.99056447                                                   | 3631.691612                                                   |
| 0.298177179                                                  | 89.97657182                                                   | 959.3739837                                                   |
| 0.256382072                                                  | 43.57359517                                                   | 2215.741425                                                   |
| 0.063624978                                                  | 137.6797425                                                   | 3629.033457                                                   |

| log.sigma.4.0.mm.3D_gldm_SmallDependenceLowGrayLevelEmphasis | log.sigma.4.0.mm.3D_gldm_LowGrayLevelEmphasis | log.sigma.4.0.mm.3D_gldm_DistanceZoneVariabilityNormalized |
|--------------------------------------------------------------|-----------------------------------------------|------------------------------------------------------------|
| 0.003531902                                                  | 0.008584145                                   | 0.918515165                                                |
| 0.002340788                                                  | 0.009298659                                   | 0.901792092                                                |
| 0.005546736                                                  | 0.025827341                                   | 0.918277811                                                |
| 0.001804102                                                  | 0.004997204                                   | 0.872271627                                                |
| 0.005606765                                                  | 0.010544605                                   | 0.847222222                                                |
| 0.00488468                                                   | 0.015106647                                   | 0.846576528                                                |
| 0.005236571                                                  | 0.029815381                                   | 0.752839506                                                |
| 0.003813324                                                  | 0.008996237                                   | 0.886728715                                                |
| 0.002104807                                                  | 0.005912249                                   | 0.927840463                                                |
| 0.001864095                                                  | 0.007805674                                   | 0.95988305                                                 |
| 0.005217324                                                  | 0.01541229                                    | 0.856225223                                                |
| 0.003445215                                                  | 0.014353993                                   | 0.936950651                                                |
| 0.004299834                                                  | 0.017974041                                   | 0.935187455                                                |
| 0.003255135                                                  | 0.016389313                                   | 0.905938043                                                |
| 0.007010931                                                  | 0.016743792                                   | 0.915826114                                                |
| 0.001163246                                                  | 0.007835001                                   | 0.939954069                                                |
| 0.004975586                                                  | 0.012827578                                   | 0.777678608                                                |
| 0.003014924                                                  | 0.017012161                                   | 0.968999938                                                |
| 0.003888059                                                  | 0.012180184                                   | 0.863071356                                                |
| 0.003593318                                                  | 0.023615137                                   | 0.976354737                                                |
| 0.001560097                                                  | 0.007460622                                   | 0.945987654                                                |
| 0.003886122                                                  | 0.014560745                                   | 0.870339569                                                |
| 0.002721185                                                  | 0.01037675                                    | 0.952730451                                                |
| 0.004052606                                                  | 0.008033775                                   | 0.743295657                                                |
| 0.007290343                                                  | 0.033861719                                   | 0.958024567                                                |
| 0.005054444                                                  | 0.017550195                                   | 0.951586942                                                |
| 0.001282347                                                  | 0.005950885                                   | 0.906910895                                                |
| 0.004604035                                                  | 0.01873765                                    | 0.953904106                                                |
| 0.004523729                                                  | 0.011563119                                   | 0.959408306                                                |
| 0.002073046                                                  | 0.00919312                                    | 0.960442305                                                |
| 0.003034546                                                  | 0.013568893                                   | 0.967888643                                                |
| 0.001995869                                                  | 0.008866995                                   | 0.966376206                                                |
| 0.00506075                                                   | 0.017231233                                   | 0.932760506                                                |
| 0.015159133                                                  | 0.020239498                                   | 0.834710744                                                |
| 0.005261077                                                  | 0.008542231                                   | 0.864088889                                                |
| 0.002987387                                                  | 0.008541054                                   | 0.861738671                                                |
| 0.003257154                                                  | 0.013843336                                   | 0.948971225                                                |
| 0.003529831                                                  | 0.017557602                                   | 0.975004006                                                |
| 0.003412445                                                  | 0.013655394                                   | 0.867346939                                                |
| 0.004638643                                                  | 0.012744646                                   | 0.970880148                                                |
| 0.002115992                                                  | 0.006903284                                   | 0.930756082                                                |
| 0.002922716                                                  | 0.010550032                                   | 0.901212371                                                |
| 0.003693706                                                  | 0.010730916                                   | 0.894294097                                                |
| 0.003762005                                                  | 0.014994722                                   | 0.820758743                                                |
| 0.002324145                                                  | 0.006671514                                   | 0.90685045                                                 |
| 0.003112592                                                  | 0.019833415                                   | 0.996131543                                                |
| 0.002300036                                                  | 0.008008325                                   | 0.875378208                                                |
| 0.006958287                                                  | 0.024807744                                   | 0.93529525                                                 |
| 0.005391175                                                  | 0.020731539                                   | 0.751404959                                                |
| 0.003682291                                                  | 0.010703346                                   | 0.765700061                                                |
| 0.002690535                                                  | 0.010599905                                   | 0.949187146                                                |
| 0.004516157                                                  | 0.018787924                                   | 0.914544397                                                |
| 0.00254237                                                   | 0.008618551                                   | 0.916698481                                                |
| 0.002934559                                                  | 0.025691731                                   | 0.976051423                                                |
| 0.001794821                                                  | 0.01077579                                    | 0.963409501                                                |
| 0.006652446                                                  | 0.014222886                                   | 0.855763655                                                |
| 0.002660123                                                  | 0.006280114                                   | 0.772957126                                                |
| 0.002576477                                                  | 0.005225351                                   | 0.719103353                                                |
| 0.003441698                                                  | 0.013987308                                   | 0.895061728                                                |
| 0.003660939                                                  | 0.019637642                                   | 0.992000129                                                |
| 0.003882819                                                  | 0.014163009                                   | 0.896513553                                                |
| 0.002384384                                                  | 0.00766587                                    | 0.931673205                                                |
| 0.002346819                                                  | 0.01079694                                    | 0.945051198                                                |
| 0.001651758                                                  | 0.007397929                                   | 0.951612668                                                |
| 0.007712575                                                  | 0.014479015                                   | 0.92866941                                                 |
| 0.003151083                                                  | 0.009352463                                   | 0.945792623                                                |
| 0.003283788                                                  | 0.017191071                                   | 0.80715851                                                 |
| 0.004160393                                                  | 0.019232279                                   | 0.947406866                                                |
| 0.006063975                                                  | 0.031890893                                   | 0.832547837                                                |
| 0.003713687                                                  | 0.013024345                                   | 0.922004098                                                |
| 0.002194107                                                  | 0.008731031                                   | 0.903647747                                                |
| 0.004937345                                                  | 0.018269009                                   | 0.926195802                                                |
| 0.002264379                                                  | 0.0128373                                     | 0.95240928                                                 |
| 0.000958817                                                  | 0.005790143                                   | 0.957641186                                                |
| 0.00281077                                                   | 0.009840828                                   | 0.957081739                                                |
| 0.003484568                                                  | 0.009524942                                   | 0.82612118                                                 |
| 0.003649775                                                  | 0.010835022                                   | 0.870399248                                                |
| 0.008115384                                                  | 0.04302779                                    | 0.872651519                                                |
| 0.00273465                                                   | 0.009488583                                   | 0.827427219                                                |
| 0.001781088                                                  | 0.007609393                                   | 0.910054089                                                |
| 0.007879692                                                  | 0.013848567                                   | 0.815910585                                                |
| 0.004050655                                                  | 0.00763297                                    | 0.868503026                                                |
| 0.001897305                                                  | 0.00530248                                    | 0.92737629                                                 |
| 0.01128505                                                   | 0.015041                                      | 0.658203125                                                |
| 0.003109865                                                  | 0.016590531                                   | 0.966578                                                   |
| 0.001405105                                                  | 0.006701783                                   | 0.8054957                                                  |
| 0.004759309                                                  | 0.015087442                                   | 0.948013983                                                |
| 0.002264391                                                  | 0.004838989                                   | 0.800365009                                                |
| 0.009602418                                                  | 0.014727708                                   | 0.869073597                                                |
| 0.012840252                                                  | 0.022298321                                   | 0.896859504                                                |
| 0.001794881                                                  | 0.007186144                                   | 0.90827795                                                 |
| 0.007184473                                                  | 0.02706481                                    | 0.951101109                                                |
| 0.004478579                                                  | 0.016572954                                   | 0.916535537                                                |
| 0.003009649                                                  | 0.012970963                                   | 0.908073993                                                |
| 0.003480707                                                  | 0.017572863                                   | 0.946519338                                                |
| 0.005487397                                                  | 0.017740223                                   | 0.708757396                                                |
| 0.002278329                                                  | 0.008196244                                   | 0.942906574                                                |
| 0.008267883                                                  | 0.034966735                                   | 0.855957031                                                |
| 0.004226294                                                  | 0.022140199                                   | 0.718271684                                                |
| 0.003029049                                                  | 0.006703616                                   | 0.899966234                                                |

| log.sigma.4.0.mm.3D_gldzm_LowIntensityEmphasis | log.sigma.4.0.mm.3D_gldzm_LargeDistanceEmphasis | log.sigma.4.0.mm.3D_gldzm_HighIntensitySmallDistanceEmphasis |
|------------------------------------------------|-------------------------------------------------|--------------------------------------------------------------|
| 0.00902073                                     | 1.127659574                                     | 360.7384752                                                  |
| 0.00969859                                     | 1.155357143                                     | 262.0325893                                                  |
| 0.021942258                                    | 1.12804878                                      | 177.7134146                                                  |
| 0.005920803                                    | 1.205696203                                     | 356.7428797                                                  |
| 0.01413093                                     | 1.25                                            | 356.8365385                                                  |
| 0.016303129                                    | 1.251162791                                     | 194.8837209                                                  |
| 0.031376253                                    | 1.433333333                                     | 137.0444444                                                  |
| 0.010115278                                    | 1.180803571                                     | 386.4263393                                                  |
| 0.006359834                                    | 1.112454655                                     | 404.6840992                                                  |
| 0.00771953                                     | 1.061433447                                     | 287.4180887                                                  |
| 0.018690413                                    | 1.233898305                                     | 198.6262712                                                  |
| 0.012990746                                    | 1.097759674                                     | 245.5351324                                                  |
| 0.021660902                                    | 1.100591716                                     | 194.852071                                                   |
| 0.013351699                                    | 1.1484375                                       | 216.8574219                                                  |
| 0.023198242                                    | 1.132075472                                     | 203.0581761                                                  |
| 0.010206948                                    | 1.092948718                                     | 246.9919872                                                  |
| 0.013417544                                    | 1.382165605                                     | 267.0175159                                                  |
| 0.012206244                                    | 1.047244094                                     | 265.2486877                                                  |
| 0.012678988                                    | 1.221789883                                     | 370.2675097                                                  |
| 0.019486335                                    | 1.035897436                                     | 161.7111111                                                  |
| 0.008529356                                    | 1.083333333                                     | 258.494213                                                   |
| 0.014085536                                    | 1.209059233                                     | 215.8022648                                                  |
| 0.010241767                                    | 1.07266436                                      | 255.2153979                                                  |
| 0.011284468                                    | 1.453658537                                     | 322.8439024                                                  |
| 0.031381495                                    | 1.064343164                                     | 129.2808311                                                  |
| 0.017347406                                    | 1.074468085                                     | 274.0097518                                                  |
| 0.007851536                                    | 1.146818923                                     | 297.4547308                                                  |
| 0.016850119                                    | 1.070815451                                     | 199.3809013                                                  |
| 0.012736693                                    | 1.062176166                                     | 258.2393135                                                  |
| 0.010503903                                    | 1.060559006                                     | 275.984472                                                   |
| 0.012612326                                    | 1.048966268                                     | 204.3601741                                                  |
| 0.008490194                                    | 1.051313378                                     | 264.957697                                                   |
| 0.019746962                                    | 1.104499274                                     | 247.6850508                                                  |
| 0.030356335                                    | 1.272727273                                     | 249.4090909                                                  |
| 0.012921121                                    | 1.22                                            | 369.8533333                                                  |
| 0.010413294                                    | 1.224137931                                     | 270.0736351                                                  |
| 0.011699115                                    | 1.07860262                                      | 235.1053493                                                  |
| 0.01810215                                     | 1.037974684                                     | 170.4306962                                                  |
| 0.017222756                                    | 1.214285714                                     | 283.9201681                                                  |
| 0.013666811                                    | 1.044334975                                     | 254.9956897                                                  |
| 0.009400785                                    | 1.107734807                                     | 315.8411602                                                  |
| 0.009878115                                    | 1.156327543                                     | 327.4565757                                                  |
| 0.012036787                                    | 1.167962675                                     | 250.726283                                                   |
| 0.013533507                                    | 1.298578199                                     | 314.9478673                                                  |
| 0.008037216                                    | 1.146919431                                     | 305.021327                                                   |
| 0.01441259                                     | 1.005813953                                     | 152.8745155                                                  |
| 0.008942281                                    | 1.200306984                                     | 260.1302763                                                  |
| 0.023253806                                    | 1.10041841                                      | 202.8012552                                                  |
| 0.023615568                                    | 1.436363636                                     | 302.1863636                                                  |
| 0.012425375                                    | 1.406542056                                     | 442.9719626                                                  |
| 0.011581728                                    | 1.07826087                                      | 232.2214674                                                  |
| 0.015695376                                    | 1.134185304                                     | 202.1956869                                                  |
| 0.009377756                                    | 1.13064133                                      | 286.5704671                                                  |
| 0.018512901                                    | 1.036363636                                     | 210.4060606                                                  |
| 0.010120803                                    | 1.055928412                                     | 215.2695749                                                  |
| 0.017479224                                    | 1.234718826                                     | 295.4969438                                                  |
| 0.00695394                                     | 1.391709845                                     | 369.0797927                                                  |
| 0.00762034                                     | 1.507042254                                     | 396.4089537                                                  |
| 0.014061718                                    | 1.166666667                                     | 248.6927083                                                  |
| 0.016687593                                    | 1.012048193                                     | 168.9568273                                                  |
| 0.01292393                                     | 1.164218959                                     | 258.0507343                                                  |
| 0.008633018                                    | 1.106253459                                     | 294.3898727                                                  |
| 0.011966734                                    | 1.084821429                                     | 189.984747                                                   |
| 0.009409974                                    | 1.074427481                                     | 248.9594466                                                  |
| 0.018507377                                    | 1.111111111                                     | 285.875                                                      |
| 0.011320684                                    | 1.083643123                                     | 293.7444238                                                  |
| 0.012173602                                    | 1.324324324                                     | 403.1743243                                                  |
| 0.015070357                                    | 1.081081081                                     | 254.0514385                                                  |
| 0.016693575                                    | 1.276699029                                     | 235.0400485                                                  |
| 0.01291803                                     | 1.12195122                                      | 235.2462737                                                  |
| 0.007683124                                    | 1.152255639                                     | 296.0035244                                                  |
| 0.016716463                                    | 1.115124153                                     | 261.6439052                                                  |
| 0.010596696                                    | 1.073170732                                     | 214.5356326                                                  |
| 0.005323491                                    | 1.064944134                                     | 316.6073673                                                  |
| 0.014487463                                    | 1.06582155                                      | 216.5838615                                                  |
| 0.010237465                                    | 1.288577154                                     | 361.8517034                                                  |
| 0.012237679                                    | 1.208955224                                     | 244.039801                                                   |
| 0.023214296                                    | 1.205035971                                     | 217.2634892                                                  |
| 0.0094664                                      | 1.286153846                                     | 286.2884615                                                  |
| 0.007290394                                    | 1.141602634                                     | 281.4377058                                                  |
| 0.016292763                                    | 1.307692308                                     | 391.5961538                                                  |
| 0.009546783                                    | 1.212264151                                     | 336.3081761                                                  |
| 0.006445928                                    | 1.113207547                                     | 349.5149371                                                  |
| 0.027054699                                    | 1.65625                                         | 228.5898438                                                  |
| 0.013892503                                    | 1.051                                           | 198.547                                                      |
| 0.007415221                                    | 1.327510917                                     | 249.6766376                                                  |
| 0.01281919                                     | 1.080118694                                     | 268.6394659                                                  |
| 0.005576548                                    | 1.337398374                                     | 481.9596883                                                  |
| 0.025557343                                    | 1.211267606                                     | 207.443662                                                   |
| 0.028091659                                    | 1.163636364                                     | 211.8090909                                                  |
| 0.007719214                                    | 1.14454776                                      | 328.4602705                                                  |
| 0.019457947                                    | 1.07523511                                      | 236.9090909                                                  |
| 0.019494734                                    | 1.130909091                                     | 155.1072727                                                  |
| 0.014896661                                    | 1.144886364                                     | 204.3383049                                                  |
| 0.01781743                                     | 1.082489146                                     | 179.08267                                                    |
| 0.016144012                                    | 1.530769231                                     | 413.6211538                                                  |
| 0.00910357                                     | 1.088235294                                     | 311.4810049                                                  |
| 0.02815937                                     | 1.234375                                        | 208.0898438                                                  |
| 0.024872696                                    | 1.508928571                                     | 172.953125                                                   |
| 0.00899259                                     | 1.158415842                                     | 415.1394389                                                  |

| log.sigma.4.0.mm.3D_gldzm_LowIntensityLargeDistanceEmphasis | log.sigma.4.0.mm.3D_gldzm_HighIntensityEmphasis | log.sigma.4.0.mm.3D_gldzm_DistanceZoneVariability | log.sigma.4.0.mm.3D_gldzm_ZonePercentage |
|-------------------------------------------------------------|-------------------------------------------------|---------------------------------------------------|------------------------------------------|
| 0.011046004                                                 | 366.1241135                                     | 259.0212766                                       | 0.399433428                              |
| 0.011135951                                                 | 268.1625                                        | 505.0035714                                       | 0.269619644                              |
| 0.026074481                                                 | 179.945122                                      | 150.597561                                        | 0.377880184                              |
| 0.006845787                                                 | 371.1170886                                     | 826.9135021                                       | 0.359772296                              |
| 0.016274623                                                 | 371.2115385                                     | 132.1666667                                       | 0.43454039                               |
| 0.019577126                                                 | 201.1209302                                     | 182.0139535                                       | 0.33437014                               |
| 0.100697729                                                 | 139.3444444                                     | 67.75555556                                       | 0.267062315                              |
| 0.011313573                                                 | 396.0290179                                     | 397.2544643                                       | 0.447105788                              |
| 0.006922296                                                 | 412.5695284                                     | 767.3240629                                       | 0.397787398                              |
| 0.00875898                                                  | 289.9078498                                     | 843.7372014                                       | 0.28373144                               |
| 0.023524225                                                 | 205.6813559                                     | 252.5864407                                       | 0.356711004                              |
| 0.014170657                                                 | 249.2362525                                     | 460.0427699                                       | 0.331309042                              |
| 0.024701849                                                 | 198.0118343                                     | 474.1400394                                       | 0.244455159                              |
| 0.015438766                                                 | 221.4921875                                     | 347.8802083                                       | 0.343470483                              |
| 0.025287753                                                 | 208.1289308                                     | 291.2327044                                       | 0.349066959                              |
| 0.01103456                                                  | 251.5128205                                     | 879.7970085                                       | 0.134734418                              |
| 0.016536082                                                 | 282.9872611                                     | 244.1910828                                       | 0.449856734                              |
| 0.012861618                                                 | 266.2388451                                     | 738.3779528                                       | 0.326758148                              |
| 0.014295771                                                 | 382.5680934                                     | 221.8093385                                       | 0.441580756                              |
| 0.019940285                                                 | 162.6290598                                     | 571.1675214                                       | 0.208853981                              |
| 0.009367237                                                 | 262.4462963                                     | 1021.666667                                       | 0.206738132                              |
| 0.026686474                                                 | 223.6916376                                     | 499.5749129                                       | 0.33372093                               |
| 0.016225647                                                 | 257.1107266                                     | 826.017301                                        | 0.31746613                               |
| 0.034551628                                                 | 346.8585366                                     | 152.3756098                                       | 0.426195426                              |
| 0.033532974                                                 | 130.3565684                                     | 357.3431635                                       | 0.309800664                              |
| 0.018320392                                                 | 275.8156028                                     | 268.3475177                                       | 0.406340058                              |
| 0.008522127                                                 | 308.3915171                                     | 555.9363785                                       | 0.176860935                              |
| 0.025801531                                                 | 200.5042918                                     | 444.5193133                                       | 0.325191905                              |
| 0.013427385                                                 | 260.7409326                                     | 740.6632124                                       | 0.437393768                              |
| 0.012087698                                                 | 278.6071429                                     | 618.5248447                                       | 0.253343824                              |
| 0.017153406                                                 | 205.6528836                                     | 889.4896627                                       | 0.289084618                              |
| 0.009202564                                                 | 267.3982896                                     | 1581.95785                                        | 0.276053963                              |
| 0.0205418                                                   | 251.8563135                                     | 642.6719884                                       | 0.338908018                              |
| 0.104981335                                                 | 250.9090909                                     | 45.90909091                                       | 0.528846154                              |
| 0.017771636                                                 | 377.1133333                                     | 129.6133333                                       | 0.451807229                              |
| 0.011784222                                                 | 282.591954                                      | 599.7701149                                       | 0.344554455                              |
| 0.013405234                                                 | 238.6375546                                     | 869.2576419                                       | 0.318055556                              |
| 0.018367224                                                 | 172.0987342                                     | 770.2531646                                       | 0.235539654                              |
| 0.021054749                                                 | 291.5210084                                     | 206.4285714                                       | 0.28502994                               |
| 0.014211355                                                 | 256.1133005                                     | 394.1773399                                       | 0.387035272                              |
| 0.011254407                                                 | 321.058011                                      | 336.9337017                                       | 0.245590231                              |
| 0.011054913                                                 | 334.8263027                                     | 363.1885856                                       | 0.422875131                              |
| 0.014263426                                                 | 255.7371695                                     | 575.0311042                                       | 0.391595615                              |
| 0.018965497                                                 | 325.4123223                                     | 346.3601896                                       | 0.411707317                              |
| 0.009653366                                                 | 312.5545024                                     | 574.0363349                                       | 0.337060703                              |
| 0.014531243                                                 | 152.9457364                                     | 514.003876                                        | 0.231597846                              |
| 0.010253648                                                 | 271.5310821                                     | 1140.617805                                       | 0.30543835                               |
| 0.024313219                                                 | 205.3556485                                     | 223.5355649                                       | 0.409948542                              |
| 0.084977899                                                 | 310.6                                           | 41.32727273                                       | 0.410447761                              |
| 0.014292234                                                 | 469.9579439                                     | 163.8598131                                       | 0.430583501                              |
| 0.012953224                                                 | 234.8913043                                     | 873.2521739                                       | 0.268691589                              |
| 0.017002271                                                 | 205.9840256                                     | 286.2523962                                       | 0.378476421                              |
| 0.010703785                                                 | 292.3056215                                     | 1157.790182                                       | 0.330541743                              |
| 0.019933355                                                 | 210.7696997                                     | 161.0484848                                       | 0.279187817                              |
| 0.010653656                                                 | 217.2841163                                     | 1291.93214                                        | 0.205580254                              |
| 0.02043049                                                  | 305.99511                                       | 350.007335                                        | 0.465301479                              |
| 0.013202077                                                 | 386.6569948                                     | 745.9036269                                       | 0.44003648                               |
| 0.011714172                                                 | 422.7706237                                     | 357.3943662                                       | 0.384377417                              |
| 0.016585138                                                 | 253.9583333                                     | 257.7777778                                       | 0.353808354                              |
| 0.017169521                                                 | 169.0321285                                     | 247.0080321                                       | 0.282633371                              |
| 0.018714393                                                 | 263.7022697                                     | 671.4886515                                       | 0.353468617                              |
| 0.009537589                                                 | 301.4947427                                     | 1683.533481                                       | 0.329864914                              |
| 0.012700095                                                 | 193.3541667                                     | 635.0740408                                       | 0.217475728                              |
| 0.00984144                                                  | 252.3931298                                     | 498.6450382                                       | 0.191871109                              |
| 0.019593443                                                 | 289                                             | 100.2962963                                       | 0.497695853                              |
| 0.01180055                                                  | 298.7825279                                     | 508.8364312                                       | 0.346426272                              |
| 0.01527524                                                  | 413.9945946                                     | 149.3243243                                       | 0.469543147                              |
| 0.015923333                                                 | 256.8683522                                     | 1086.675676                                       | 0.35877385                               |
| 0.019926166                                                 | 243.5776699                                     | 171.5048544                                       | 0.461883408                              |
| 0.014704459                                                 | 240.2859079                                     | 680.4390244                                       | 0.366981601                              |
| 0.009247241                                                 | 302.3045113                                     | 961.481203                                        | 0.35                                     |
| 0.01797591                                                  | 265.234763                                      | 410.3047404                                       | 0.39238264                               |
| 0.01123763                                                  | 217.1051829                                     | 1249.560976                                       | 0.253869969                              |
| 0.005636456                                                 | 320.6731844                                     | 1371.342179                                       | 0.213222156                              |
| 0.014816415                                                 | 220.8425158                                     | 1962.974647                                       | 0.223420479                              |
| 0.012394162                                                 | 378.5170341                                     | 412.2344689                                       | 0.447132616                              |
| 0.017148915                                                 | 250.2711443                                     | 349.9004975                                       | 0.359892569                              |
| 0.027118437                                                 | 222.3165468                                     | 242.5971223                                       | 0.455737705                              |
| 0.021046464                                                 | 296.7446154                                     | 537.8276923                                       | 0.368480726                              |
| 0.008516362                                                 | 288.1086718                                     | 829.0592755                                       | 0.320098384                              |
| 0.018487745                                                 | 405.3516484                                     | 222.7435897                                       | 0.541666667                              |
| 0.016284028                                                 | 347.6006289                                     | 552.3679245                                       | 0.474272931                              |
| 0.0068738                                                   | 358.7389937                                     | 884.7169811                                       | 0.341690544                              |
| 0.097776639                                                 | 239.875                                         | 42.125                                            | 0.44137931                               |
| 0.014449824                                                 | 199.819                                         | 966.578                                           | 0.29489826                               |
| 0.009149454                                                 | 277.9388646                                     | 922.2925764                                       | 0.209094229                              |
| 0.013372068                                                 | 272.4718101                                     | 319.4807122                                       | 0.433161954                              |
| 0.007689353                                                 | 506.2127371                                     | 590.6693767                                       | 0.475515464                              |
| 0.027600024                                                 | 216.1267606                                     | 61.70422535                                       | 0.387978142                              |
| 0.085364387                                                 | 213.5272727                                     | 49.32727273                                       | 0.523809524                              |
| 0.008541626                                                 | 337.7075232                                     | 1074.492815                                       | 0.297610063                              |
| 0.030149642                                                 | 238.1222571                                     | 303.4012539                                       | 0.45184136                               |
| 0.020925621                                                 | 158.9309091                                     | 252.0472727                                       | 0.269080235                              |
| 0.016914108                                                 | 208.5179924                                     | 958.9261364                                       | 0.258190709                              |
| 0.021469255                                                 | 181.1432706                                     | 1308.089725                                       | 0.238029625                              |
| 0.020513689                                                 | 438.4692308                                     | 92.13846154                                       | 0.513833992                              |
| 0.009420075                                                 | 318.0196078                                     | 384.7058824                                       | 0.335526316                              |
| 0.091805204                                                 | 209.15625                                       | 54.78125                                          | 0.520325203                              |
| 0.041952856                                                 | 186.7678571                                     | 80.44642857                                       | 0.295514512                              |
| 0.009741706                                                 | 424.5478548                                     | 272.689769                                        | 0.375464684                              |

| log.sigma.4.0.mm.3D_gldzm_IntensityVariabilityNormalized | log.sigma.4.0.mm.3D_gldzm_LowIntensitySmallDistanceEmphasis | log.sigma.4.0.mm.3D_gldzm_IntensityVariability |
|----------------------------------------------------------|-------------------------------------------------------------|------------------------------------------------|
| 0.043458579                                              | 0.009616091                                                 | 12.25531915                                    |
| 0.05002551                                               | 0.009678336                                                 | 28.01428571                                    |
| 0.057108864                                              | 0.020909203                                                 | 9.365853659                                    |
| 0.046478039                                              | 0.005689556                                                 | 44.06118143                                    |
| 0.041584484                                              | 0.013595007                                                 | 6.487179487                                    |
| 0.063926447                                              | 0.01548463                                                  | 13.74418605                                    |
| 0.064691358                                              | 0.014045884                                                 | 5.822222222                                    |
| 0.038285236                                              | 0.009815704                                                 | 17.15178571                                    |
| 0.040096267                                              | 0.006219218                                                 | 33.15961306                                    |
| 0.051981451                                              | 0.007459668                                                 | 45.69169511                                    |
| 0.055374892                                              | 0.01748196                                                  | 16.33559322                                    |
| 0.046519634                                              | 0.012695769                                                 | 22.84114053                                    |
| 0.048757241                                              | 0.020900665                                                 | 24.7199211                                     |
| 0.054009332                                              | 0.012829933                                                 | 20.73958333                                    |
| 0.048316918                                              | 0.022675865                                                 | 15.36477987                                    |
| 0.053644806                                              | 0.010000045                                                 | 50.21153846                                    |
| 0.04679703                                               | 0.01263791                                                  | 14.69426752                                    |
| 0.045332424                                              | 0.012042401                                                 | 34.54330709                                    |
| 0.041650896                                              | 0.012274792                                                 | 10.70428016                                    |
| 0.060781649                                              | 0.019372847                                                 | 35.55726496                                    |
| 0.0610631                                                | 0.008319886                                                 | 65.94814815                                    |
| 0.050103801                                              | 0.010935301                                                 | 28.75958188                                    |
| 0.056186801                                              | 0.008745797                                                 | 48.71395617                                    |
| 0.045520523                                              | 0.005467677                                                 | 9.331707317                                    |
| 0.064005348                                              | 0.030843625                                                 | 23.87399464                                    |
| 0.046325638                                              | 0.01710416                                                  | 13.06382979                                    |
| 0.054035857                                              | 0.007683888                                                 | 33.12398042                                    |
| 0.056549209                                              | 0.014612267                                                 | 26.35193133                                    |
| 0.045752906                                              | 0.01256402                                                  | 35.32124352                                    |
| 0.048623703                                              | 0.010107954                                                 | 31.3136646                                     |
| 0.062810146                                              | 0.011477056                                                 | 57.72252448                                    |
| 0.052664614                                              | 0.008312102                                                 | 86.21197312                                    |
| 0.044516674                                              | 0.019548252                                                 | 30.67198839                                    |
| 0.049256198                                              | 0.011700085                                                 | 2.709090909                                    |
| 0.045511111                                              | 0.011708492                                                 | 6.826666667                                    |
| 0.046749075                                              | 0.010070562                                                 | 32.53735632                                    |
| 0.048354341                                              | 0.011272585                                                 | 44.29257642                                    |
| 0.057766384                                              | 0.018035882                                                 | 45.63544304                                    |
| 0.051091025                                              | 0.016264757                                                 | 12.15966387                                    |
| 0.047368293                                              | 0.013530675                                                 | 19.23152709                                    |
| 0.051921492                                              | 0.00893738                                                  | 18.79558011                                    |
| 0.044166272                                              | 0.009583915                                                 | 17.79900744                                    |
| 0.048250207                                              | 0.011480127                                                 | 31.02488336                                    |
| 0.042216033                                              | 0.01217551                                                  | 17.81516588                                    |
| 0.047964888                                              | 0.007633178                                                 | 30.36176935                                    |
| 0.070646295                                              | 0.014382927                                                 | 36.45348837                                    |
| 0.04855611                                               | 0.00861444                                                  | 63.2686109                                     |
| 0.05299277                                               | 0.022988953                                                 | 12.66527197                                    |
| 0.055206612                                              | 0.008274985                                                 | 3.036363636                                    |
| 0.037688881                                              | 0.01195866                                                  | 8.065420561                                    |
| 0.053149811                                              | 0.011238854                                                 | 48.89782609                                    |
| 0.055946269                                              | 0.015368652                                                 | 17.51118211                                    |
| 0.046952392                                              | 0.009046249                                                 | 59.30087094                                    |
| 0.059320478                                              | 0.018157787                                                 | 9.787878788                                    |
| 0.055595872                                              | 0.00998759                                                  | 74.55406413                                    |
| 0.04186369                                               | 0.016741408                                                 | 17.12224939                                    |
| 0.042809203                                              | 0.005391906                                                 | 41.31088083                                    |
| 0.043419471                                              | 0.006596882                                                 | 21.57947686                                    |
| 0.052107446                                              | 0.013430864                                                 | 15.00694444                                    |
| 0.071047241                                              | 0.016567111                                                 | 17.69076305                                    |
| 0.046743232                                              | 0.011476315                                                 | 35.01068091                                    |
| 0.046377168                                              | 0.008406876                                                 | 83.80354178                                    |
| 0.060467156                                              | 0.011783394                                                 | 40.63392857                                    |
| 0.056042771                                              | 0.009302108                                                 | 29.36641221                                    |
| 0.051097394                                              | 0.018235861                                                 | 5.518518519                                    |
| 0.044616575                                              | 0.011200717                                                 | 24.00371747                                    |
| 0.045434624                                              | 0.011398192                                                 | 8.405405405                                    |
| 0.044237308                                              | 0.014857112                                                 | 50.7401918                                     |
| 0.048920728                                              | 0.015885427                                                 | 10.0776699                                     |
| 0.04873275                                               | 0.012471422                                                 | 35.96476965                                    |
| 0.047488906                                              | 0.007292095                                                 | 50.52819549                                    |
| 0.045722526                                              | 0.016401601                                                 | 20.25507901                                    |
| 0.055416001                                              | 0.010436462                                                 | 72.70579268                                    |
| 0.060859524                                              | 0.005245249                                                 | 87.15083799                                    |
| 0.049261387                                              | 0.014405225                                                 | 101.0351048                                    |
| 0.043778941                                              | 0.009698291                                                 | 21.84569138                                    |
| 0.052498701                                              | 0.01100987                                                  | 21.10447761                                    |
| 0.047461312                                              | 0.022238261                                                 | 13.1942446                                     |
| 0.047597633                                              | 0.006571384                                                 | 30.93846154                                    |
| 0.054343727                                              | 0.006983902                                                 | 49.50713502                                    |
| 0.038548753                                              | 0.015744018                                                 | 10.52380952                                    |
| 0.045261263                                              | 0.007862472                                                 | 28.78616352                                    |
| 0.044860216                                              | 0.00633896                                                  | 42.7966457                                     |
| 0.055664063                                              | 0.009374214                                                 | 3.5625                                         |
| 0.056194                                                 | 0.013753172                                                 | 56.194                                         |
| 0.053799889                                              | 0.006981662                                                 | 61.60087336                                    |
| 0.045795948                                              | 0.01268097                                                  | 15.43323442                                    |
| 0.040830341                                              | 0.005048347                                                 | 30.13279133                                    |
| 0.060900615                                              | 0.025046672                                                 | 4.323943662                                    |
| 0.061157025                                              | 0.013773477                                                 | 3.363636364                                    |
| 0.043876729                                              | 0.007513611                                                 | 51.90617075                                    |
| 0.045371016                                              | 0.016785023                                                 | 14.47335423                                    |
| 0.059570248                                              | 0.019137012                                                 | 16.38181818                                    |
| 0.0537764                                                | 0.014392299                                                 | 56.78787879                                    |
| 0.056866137                                              | 0.016904473                                                 | 78.58900145                                    |
| 0.034556213                                              | 0.015051593                                                 | 4.492307692                                    |
| 0.045259035                                              | 0.009024443                                                 | 18.46568627                                    |
| 0.058105469                                              | 0.012247912                                                 | 3.71875                                        |
| 0.060746173                                              | 0.020602656                                                 | 6.803571429                                    |
| 0.040856561                                              | 0.008805311                                                 | 12.37953795                                    |

| log.sigma.4.0.mm.3D_gldzm_HighIntensityLargeDistanceEmphasis | log.sigma.4.0.mm.3D_gldzm_SmallDistanceEmphasis | log.sigma.4.0.mm.3D_gldzm_SumVariance | log.sigma.4.0.mm.3D_gldzm_Homogeneity1 |
|--------------------------------------------------------------|-------------------------------------------------|---------------------------------------|----------------------------------------|
| 387.666667                                                   | 0.968085106                                     | 801.3539759                           | 0.30375618                             |
| 292.6821429                                                  | 0.961160714                                     | 547.1840226                           | 0.403699863                            |
| 188.8719512                                                  | 0.967987805                                     | 316.3153402                           | 0.339562609                            |
| 428.6139241                                                  | 0.948575949                                     | 1050.03549                            | 0.321590341                            |
| 428.7115385                                                  | 0.9375                                          | 992.6459645                           | 0.297256942                            |
| 226.0697674                                                  | 0.937209302                                     | 400.1325396                           | 0.335593429                            |
| 148.5444444                                                  | 0.891666667                                     | 225.2446742                           | 0.405267358                            |
| 434.4397321                                                  | 0.954799107                                     | 902.8816716                           | 0.269659107                            |
| 444.1112455                                                  | 0.971886336                                     | 1015.977157                           | 0.30567607                             |
| 299.8668942                                                  | 0.984641638                                     | 600.4913971                           | 0.375971772                            |
| 233.9016949                                                  | 0.941525424                                     | 483.0531575                           | 0.317237453                            |
| 264.0407332                                                  | 0.975560081                                     | 538.1571146                           | 0.33870904                             |
| 210.6508876                                                  | 0.974852071                                     | 401.9096153                           | 0.372329207                            |
| 240.03125                                                    | 0.962890625                                     | 523.1739258                           | 0.330747959                            |
| 228.4119497                                                  | 0.966981132                                     | 467.8460436                           | 0.335068415                            |
| 269.5961538                                                  | 0.976762821                                     | 566.3372467                           | 0.539750757                            |
| 346.866242                                                   | 0.904458599                                     | 683.3239686                           | 0.292691036                            |
| 270.1994751                                                  | 0.988188976                                     | 504.6062164                           | 0.337091857                            |
| 431.770428                                                   | 0.944552529                                     | 956.7679809                           | 0.277438952                            |
| 166.3008547                                                  | 0.991025641                                     | 256.5148887                           | 0.433837637                            |
| 278.2546296                                                  | 0.979166667                                     | 543.6786502                           | 0.435547687                            |
| 255.2491289                                                  | 0.947735192                                     | 465.4594004                           | 0.332072888                            |
| 264.6920415                                                  | 0.98183391                                      | 522.1846716                           | 0.364549132                            |
| 442.9170732                                                  | 0.886585366                                     | 1041.023215                           | 0.3128033                              |
| 134.6595174                                                  | 0.983914209                                     | 203.7324236                           | 0.386018818                            |
| 283.0390071                                                  | 0.981382979                                     | 524.1309342                           | 0.303658756                            |
| 352.1386623                                                  | 0.963295269                                     | 688.7593918                           | 0.472187814                            |
| 204.9978541                                                  | 0.982296137                                     | 333.3423533                           | 0.371557827                            |
| 270.7474093                                                  | 0.984455959                                     | 733.0382672                           | 0.302083087                            |
| 289.0978261                                                  | 0.984860248                                     | 594.4908788                           | 0.41459492                             |
| 210.8237214                                                  | 0.987758433                                     | 377.0256819                           | 0.386547221                            |
| 277.1606597                                                  | 0.987171655                                     | 598.8245044                           | 0.386724975                            |
| 268.5413643                                                  | 0.973875181                                     | 625.9828217                           | 0.327101591                            |
| 256.9090909                                                  | 0.931818182                                     | 608.2912574                           | 0.269709601                            |
| 406.1533333                                                  | 0.945                                           | 987.276679                            | 0.286230323                            |
| 332.6652299                                                  | 0.943965517                                     | 738.4659679                           | 0.319286232                            |
| 252.7663755                                                  | 0.980349345                                     | 461.8744257                           | 0.348539907                            |
| 178.7708861                                                  | 0.990506329                                     | 366.4074896                           | 0.397591999                            |
| 321.9243697                                                  | 0.946428571                                     | 740.9386001                           | 0.352724517                            |
| 260.5837438                                                  | 0.988916256                                     | 576.3199436                           | 0.32203885                             |
| 341.9254144                                                  | 0.973066298                                     | 728.0282536                           | 0.381887616                            |
| 364.3052109                                                  | 0.960918114                                     | 786.0373565                           | 0.291222813                            |
| 275.7807154                                                  | 0.958009331                                     | 643.4236943                           | 0.306980725                            |
| 367.2701422                                                  | 0.92535545                                      | 755.1596457                           | 0.294275068                            |
| 342.6872038                                                  | 0.963270142                                     | 772.9008064                           | 0.333864336                            |
| 153.2306202                                                  | 0.998546512                                     | 212.5330997                           | 0.435000368                            |
| 317.1343054                                                  | 0.949923254                                     | 667.2831615                           | 0.345403792                            |
| 215.5732218                                                  | 0.974895397                                     | 433.8550264                           | 0.314470913                            |
| 344.2545455                                                  | 0.890909091                                     | 750.7209299                           | 0.286918872                            |
| 577.9018692                                                  | 0.898364486                                     | 1280.852216                           | 0.282697494                            |
| 245.5706522                                                  | 0.980434783                                     | 492.1083526                           | 0.384652214                            |
| 221.1373802                                                  | 0.966453674                                     | 476.7847015                           | 0.308835041                            |
| 315.2462391                                                  | 0.967339667                                     | 667.3727315                           | 0.346505262                            |
| 212.2242424                                                  | 0.990909091                                     | 420.3293058                           | 0.362316069                            |
| 225.3422819                                                  | 0.986017897                                     | 449.3574315                           | 0.460556954                            |
| 347.9877751                                                  | 0.941320293                                     | 747.9964161                           | 0.277103943                            |
| 456.9658031                                                  | 0.902072539                                     | 940.0905134                           | 0.275836459                            |
| 528.2173038                                                  | 0.873239437                                     | 1182.282178                           | 0.305048163                            |
| 275.0208333                                                  | 0.958333333                                     | 502.4208684                           | 0.346512949                            |
| 169.3333333                                                  | 0.996987952                                     | 340.0448387                           | 0.364455256                            |
| 286.3084112                                                  | 0.95894526                                      | 503.8634997                           | 0.320479292                            |
| 329.9142225                                                  | 0.973436635                                     | 772.5546337                           | 0.345327931                            |
| 206.8318452                                                  | 0.978794643                                     | 401.9540116                           | 0.437975284                            |
| 266.1278626                                                  | 0.98139313                                      | 543.9936364                           | 0.461996851                            |
| 301.5                                                        | 0.972222222                                     | 667.9161551                           | 0.287475356                            |
| 318.9349442                                                  | 0.979089219                                     | 682.6409373                           | 0.342229743                            |
| 457.2756757                                                  | 0.918918919                                     | 901.4396553                           | 0.284765967                            |
| 268.1366007                                                  | 0.97972973                                      | 543.4757585                           | 0.327265869                            |
| 277.7281553                                                  | 0.930825243                                     | 527.6699796                           | 0.286357294                            |
| 260.4444444                                                  | 0.969512195                                     | 507.9694812                           | 0.330689863                            |
| 327.5084586                                                  | 0.96193609                                      | 665.5168127                           | 0.333123456                            |
| 279.5981941                                                  | 0.971218962                                     | 548.5581649                           | 0.300904393                            |
| 227.3833841                                                  | 0.981707317                                     | 402.437045                            | 0.398191952                            |
| 336.9364525                                                  | 0.983763966                                     | 705.9017567                           | 0.421771963                            |
| 237.8771331                                                  | 0.983544612                                     | 531.3415155                           | 0.434650118                            |
| 445.1783567                                                  | 0.927855711                                     | 917.6275252                           | 0.274418932                            |
| 275.1965174                                                  | 0.947761194                                     | 559.2465993                           | 0.320423757                            |
| 242.528777                                                   | 0.948741007                                     | 415.4543458                           | 0.287769616                            |
| 338.5692308                                                  | 0.928461538                                     | 709.3041554                           | 0.309604337                            |
| 314.7925357                                                  | 0.964599341                                     | 669.6631611                           | 0.345300959                            |
| 460.3736264                                                  | 0.923076923                                     | 887.5738412                           | 0.248274925                            |
| 392.7704403                                                  | 0.946933962                                     | 923.2413101                           | 0.284162795                            |
| 395.6352201                                                  | 0.971698113                                     | 964.9469002                           | 0.341012509                            |
| 285.015625                                                   | 0.8359375                                       | 614.594513                            | 0.310815844                            |
| 204.907                                                      | 0.98725                                         | 383.5911526                           | 0.363106299                            |
| 390.9877729                                                  | 0.918122271                                     | 630.7454543                           | 0.413809774                            |
| 287.8011869                                                  | 0.979970326                                     | 551.149847                            | 0.296093673                            |
| 603.2249322                                                  | 0.915650407                                     | 1373.78039                            | 0.263123711                            |
| 250.8591549                                                  | 0.947183099                                     | 493.1558394                           | 0.366585876                            |
| 220.4                                                        | 0.959090909                                     | 417.055887                            | 0.308298539                            |
| 374.6965342                                                  | 0.96386306                                      | 800.0415652                           | 0.373864383                            |
| 242.9749216                                                  | 0.981191223                                     | 432.660536                            | 0.288901622                            |
| 174.2254545                                                  | 0.967272727                                     | 330.2227405                           | 0.408697132                            |
| 225.2367424                                                  | 0.963778409                                     | 448.5080308                           | 0.388728258                            |
| 189.3856729                                                  | 0.979377713                                     | 339.1650605                           | 0.409143278                            |
| 537.8615385                                                  | 0.867307692                                     | 1200.036574                           | 0.238230888                            |
| 344.1740196                                                  | 0.977941176                                     | 902.5496164                           | 0.339870445                            |
| 213.421875                                                   | 0.94140625                                      | 424.2855795                           | 0.275606529                            |
| 242.0267857                                                  | 0.872767857                                     | 483.552813                            | 0.360195014                            |
| 462.1815182                                                  | 0.96039604                                      | 929.3485325                           | 0.331614737                            |

| log.sigma.4.0.mm.3D_glcmm_Homogeneity2 | log.sigma.4.0.mm.3D_glcmm_ClusterShade | log.sigma.4.0.mm.3D_glcmm_MaximumProbability | log.sigma.4.0.mm.3D_glcmm_Ldmn | log.sigma.4.0.mm.3D_glcmm_SumVariance2 |
|----------------------------------------|----------------------------------------|----------------------------------------------|--------------------------------|----------------------------------------|
| 0.210880713                            | 227.6241195                            | 0.012274111                                  | 0.976383688                    | 114.6125283                            |
| 0.328721665                            | 213.1521779                            | 0.031506635                                  | 0.982786249                    | 69.21251527                            |
| 0.247817116                            | 169.0652513                            | 0.020289496                                  | 0.968315013                    | 67.15575664                            |
| 0.231485978                            | -54.88954146                           | 0.010911686                                  | 0.980530634                    | 90.96891448                            |
| 0.203622796                            | -124.3669187                           | 0.014035396                                  | 0.970245029                    | 153.2862273                            |
| 0.241171969                            | -6.740150726                           | 0.013926605                                  | 0.967566166                    | 62.59137481                            |
| 0.324344153                            | 148.1023606                            | 0.027111371                                  | 0.972724754                    | 46.86354267                            |
| 0.175308536                            | 241.9951753                            | 0.009771576                                  | 0.973889352                    | 139.9106811                            |
| 0.214223858                            | 290.3899184                            | 0.010071589                                  | 0.978436213                    | 121.526591                             |
| 0.292333069                            | 220.470207                             | 0.01630416                                   | 0.982650549                    | 68.26369471                            |
| 0.224120376                            | -108.0151385                           | 0.013472156                                  | 0.965616449                    | 73.73442379                            |
| 0.248433908                            | 308.2074992                            | 0.011456737                                  | 0.978508773                    | 95.05653743                            |
| 0.285637257                            | 415.8026428                            | 0.014105686                                  | 0.978900231                    | 86.35898275                            |
| 0.23739429                             | -105.725287                            | 0.012382007                                  | 0.973599026                    | 88.01618053                            |
| 0.243190849                            | 205.0509343                            | 0.014402072                                  | 0.973059537                    | 81.30007987                            |
| 0.488638734                            | 85.56324612                            | 0.122831372                                  | 0.990680779                    | 43.18210205                            |
| 0.197676672                            | -159.4844914                           | 0.012324398                                  | 0.969427973                    | 108.2225977                            |
| 0.249950693                            | 512.5666408                            | 0.012854082                                  | 0.975252517                    | 105.8414889                            |
| 0.18415505                             | -503.566646                            | 0.012376904                                  | 0.969414468                    | 138.7313289                            |
| 0.35966717                             | 135.0049853                            | 0.043308321                                  | 0.981234491                    | 49.74398044                            |
| 0.361097258                            | 89.19497206                            | 0.032237898                                  | 0.988643159                    | 42.50728439                            |
| 0.239717737                            | 407.5790006                            | 0.010896271                                  | 0.98209326                     | 90.74525375                            |
| 0.27839687                             | 245.751579                             | 0.017550127                                  | 0.982047595                    | 72.3838811                             |
| 0.21785534                             | -535.0947478                           | 0.016475666                                  | 0.973766299                    | 104.7189074                            |
| 0.300434212                            | 90.45757715                            | 0.0219513                                    | 0.973821694                    | 42.5526717                             |
| 0.212427939                            | 308.8711149                            | 0.015037954                                  | 0.97057509                     | 96.84530602                            |
| 0.404949047                            | 142.1980191                            | 0.086396489                                  | 0.989353314                    | 45.61617122                            |
| 0.286151237                            | 285.9868312                            | 0.016845298                                  | 0.97908505                     | 70.42749745                            |
| 0.209567052                            | -150.8752981                           | 0.010870152                                  | 0.968028423                    | 112.9978054                            |
| 0.34138072                             | 67.16535142                            | 0.030397823                                  | 0.985420262                    | 69.05417852                            |
| 0.303708233                            | 262.1733202                            | 0.023381003                                  | 0.981770665                    | 56.14867355                            |
| 0.305723931                            | 224.3441028                            | 0.0271488                                    | 0.98498123                     | 77.28315227                            |
| 0.23629707                             | 43.86474543                            | 0.009882072                                  | 0.976292448                    | 101.058113                             |
| 0.173745093                            | 77.91252423                            | 0.025091097                                  | 0.951825825                    | 106.8898226                            |
| 0.191167886                            | -484.776927                            | 0.019390211                                  | 0.966473406                    | 106.8210222                            |
| 0.227753902                            | -33.85354763                           | 0.011972958                                  | 0.976886945                    | 95.15190333                            |
| 0.262679135                            | 441.2976417                            | 0.012877943                                  | 0.979839232                    | 91.51835445                            |
| 0.315270457                            | 27.86110028                            | 0.019078526                                  | 0.980247021                    | 62.1626437                             |
| 0.264823908                            | -343.0016567                           | 0.019305956                                  | 0.98031606                     | 80.0663134                             |
| 0.23087065                             | -12.1129853                            | 0.014161673                                  | 0.97521633                     | 91.03509493                            |
| 0.299415346                            | 53.86768285                            | 0.020766365                                  | 0.986443221                    | 67.12935314                            |
| 0.197206161                            | 185.491116                             | 0.010636702                                  | 0.97366694                     | 125.9245359                            |
| 0.213444401                            | -118.5343206                           | 0.009409586                                  | 0.970432688                    | 92.58872558                            |
| 0.201129663                            | 76.09964716                            | 0.011007625                                  | 0.971877356                    | 130.3811075                            |
| 0.2426551                              | 118.1448039                            | 0.010989962                                  | 0.978643804                    | 78.96131787                            |
| 0.360866532                            | 165.5274659                            | 0.028112657                                  | 0.980651117                    | 38.54488876                            |
| 0.255130809                            | 62.56392881                            | 0.01052791                                   | 0.980471339                    | 77.84752786                            |
| 0.222077376                            | 28.9531594                             | 0.014595566                                  | 0.966986335                    | 92.38588268                            |
| 0.193106845                            | -227.5109274                           | 0.02598293                                   | 0.958697811                    | 93.39514407                            |
| 0.191469255                            | -491.601147                            | 0.016387649                                  | 0.975487769                    | 151.7868688                            |
| 0.301275886                            | 193.6540751                            | 0.029566038                                  | 0.98374655                     | 69.52442478                            |
| 0.217823538                            | -37.65378456                           | 0.015022514                                  | 0.952639179                    | 94.26198706                            |
| 0.260692944                            | 266.3816077                            | 0.019053527                                  | 0.982313576                    | 82.93700222                            |
| 0.272395069                            | -118.3698482                           | 0.020845657                                  | 0.974961392                    | 66.45634041                            |
| 0.396069402                            | 217.6278222                            | 0.06247493                                   | 0.983460771                    | 62.02603036                            |
| 0.182338145                            | -35.65733194                           | 0.010100718                                  | 0.970628216                    | 118.7940925                            |
| 0.182363219                            | 32.95470677                            | 0.007294585                                  | 0.970320796                    | 111.4289742                            |
| 0.213559851                            | -366.825032                            | 0.016225233                                  | 0.978380338                    | 102.4069692                            |
| 0.257088887                            | 265.0569145                            | 0.0147003                                    | 0.976249764                    | 87.8844655                             |
| 0.272481836                            | -33.61159348                           | 0.015543384                                  | 0.97308473                     | 58.29180355                            |
| 0.230341383                            | 457.0044182                            | 0.013396625                                  | 0.973319036                    | 103.3184498                            |
| 0.259069088                            | 395.1561519                            | 0.015110332                                  | 0.98462194                     | 101.9503247                            |
| 0.364894879                            | 145.8073712                            | 0.039340613                                  | 0.986595335                    | 44.97080241                            |
| 0.396295254                            | 161.8528336                            | 0.043896306                                  | 0.984040149                    | 43.88874758                            |
| 0.190795315                            | -73.29573741                           | 0.018347991                                  | 0.965292015                    | 98.08910602                            |
| 0.256308299                            | 362.8461103                            | 0.016915807                                  | 0.979352233                    | 88.34746582                            |
| 0.19191531                             | -515.3535732                           | 0.015547846                                  | 0.971034803                    | 118.0821411                            |
| 0.240195391                            | 286.3556502                            | 0.010984403                                  | 0.972205566                    | 116.9761398                            |
| 0.190524688                            | -195.3773167                           | 0.013295946                                  | 0.964612787                    | 109.6734908                            |
| 0.241383819                            | 337.5993226                            | 0.011147962                                  | 0.974487717                    | 91.12332271                            |
| 0.246186246                            | 271.4272889                            | 0.013596718                                  | 0.977593402                    | 96.22581239                            |
| 0.208100474                            | 216.8522039                            | 0.009165921                                  | 0.971109712                    | 113.1160646                            |
| 0.319762723                            | 276.5533821                            | 0.025028742                                  | 0.981757745                    | 64.9726919                             |
| 0.346964608                            | 128.5151091                            | 0.027853654                                  | 0.986514351                    | 53.02333911                            |
| 0.3630385                              | 306.3313163                            | 0.039525359                                  | 0.986709305                    | 60.99757268                            |
| 0.181386714                            | 71.0676766                             | 0.00982029                                   | 0.975650984                    | 122.1285974                            |
| 0.228740361                            | 113.8638796                            | 0.012624739                                  | 0.978255929                    | 82.64288955                            |
| 0.193400732                            | 474.2767133                            | 0.010034914                                  | 0.962660906                    | 120.2115635                            |
| 0.218582783                            | 136.8818467                            | 0.011166073                                  | 0.971191744                    | 95.12854566                            |
| 0.255419227                            | 120.9634876                            | 0.013289423                                  | 0.981595407                    | 72.55584048                            |
| 0.155792459                            | -28.45351531                           | 0.01046149                                   | 0.962493943                    | 147.9956081                            |
| 0.189812867                            | -96.43203935                           | 0.008293579                                  | 0.975482028                    | 110.2299995                            |
| 0.254536728                            | 197.4387025                            | 0.017557184                                  | 0.981202457                    | 91.76757346                            |
| 0.218017709                            | -185.0376585                           | 0.034697921                                  | 0.959189952                    | 68.70536215                            |
| 0.276018935                            | 222.6523744                            | 0.013433444                                  | 0.978100792                    | 68.02388465                            |
| 0.337187509                            | 235.2683936                            | 0.026744195                                  | 0.985267298                    | 56.06692972                            |
| 0.202857063                            | 458.1817722                            | 0.011577484                                  | 0.972348488                    | 120.4746541                            |
| 0.17035017                             | -440.8851114                           | 0.007338184                                  | 0.970103679                    | 145.0289499                            |
| 0.279137424                            | 73.4175159                             | 0.029550888                                  | 0.970901816                    | 51.64262209                            |
| 0.214576769                            | 175.0068293                            | 0.032451955                                  | 0.960687618                    | 74.2480099                             |
| 0.294041346                            | 168.4515274                            | 0.033973437                                  | 0.98288947                     | 83.24494308                            |
| 0.195946667                            | 492.2345993                            | 0.012043595                                  | 0.969408249                    | 118.3842216                            |
| 0.329303243                            | 129.2123819                            | 0.033356254                                  | 0.975558739                    | 53.41322377                            |
| 0.306906551                            | 162.3434633                            | 0.023297558                                  | 0.981429507                    | 62.36418468                            |
| 0.331144884                            | 97.79829899                            | 0.024438173                                  | 0.980638589                    | 58.10327309                            |
| 0.147671199                            | -473.8365687                           | 0.015125361                                  | 0.958738462                    | 211.3977061                            |
| 0.250887909                            | -34.712154                             | 0.013921475                                  | 0.977104023                    | 84.50114196                            |
| 0.180367973                            | -10.15726948                           | 0.020757882                                  | 0.942460921                    | 83.31757426                            |
| 0.270159304                            | -197.9932042                           | 0.020484254                                  | 0.975745622                    | 75.21610089                            |
| 0.244604644                            | 368.266211                             | 0.015858839                                  | 0.981767103                    | 102.6138671                            |

| log.sigma.4.0.mm.3D_glc_m_Contrast | log.sigma.4.0.mm.3D_glc_m_DifferenceEntropy | log.sigma.4.0.mm.3D_glc_m_InverseVariance | log.sigma.4.0.mm.3D_glc_m_Entropy | log.sigma.4.0.mm.3D_glc_m_Dissimilarity |
|------------------------------------|---------------------------------------------|-------------------------------------------|-----------------------------------|-----------------------------------------|
| 29.22330579                        | 3.427469584                                 | 0.216464982                               | 8.218148098                       | 4.280372342                             |
| 18.87953451                        | 3.164816867                                 | 0.30658256                                | 7.823835187                       | 3.124460407                             |
| 20.04460789                        | 3.183148172                                 | 0.250173325                               | 7.509075752                       | 3.524190994                             |
| 26.77224525                        | 3.422020969                                 | 0.235418313                               | 8.436313833                       | 4.031265495                             |
| 31.35287827                        | 3.46326242                                  | 0.213660656                               | 8.009709428                       | 4.402033097                             |
| 18.76159508                        | 3.159064184                                 | 0.246343385                               | 7.736933174                       | 3.469205826                             |
| 12.06299702                        | 2.786201982                                 | 0.330822487                               | 6.922810026                       | 2.622818883                             |
| 40.52927706                        | 3.690977213                                 | 0.178921624                               | 8.716564337                       | 5.097123368                             |
| 31.58305882                        | 3.554667987                                 | 0.21881668                                | 8.712041619                       | 4.374133614                             |
| 17.76431576                        | 3.168500884                                 | 0.291257041                               | 7.924752576                       | 3.169243993                             |
| 23.4533415                         | 3.276707814                                 | 0.227556564                               | 7.907799638                       | 3.899285899                             |
| 22.17916348                        | 3.286820528                                 | 0.250114467                               | 8.202904932                       | 3.645715592                             |
| 16.63145529                        | 3.105141166                                 | 0.284700744                               | 7.971623863                       | 3.104249347                             |
| 20.7659472                         | 3.246264852                                 | 0.243253479                               | 8.097343308                       | 3.614993849                             |
| 21.42739275                        | 3.270006872                                 | 0.24818678                                | 7.993121214                       | 3.616587029                             |
| 10.16724019                        | 2.675698583                                 | 0.358259552                               | 6.750156928                       | 1.986667173                             |
| 30.01048304                        | 3.400988565                                 | 0.210813511                               | 8.202839785                       | 4.375077597                             |
| 25.82878463                        | 3.387739334                                 | 0.248725909                               | 8.393662785                       | 3.880558187                             |
| 38.42086213                        | 3.602758895                                 | 0.186633371                               | 8.381830288                       | 4.953947583                             |
| 12.60209879                        | 2.947673133                                 | 0.31808146                                | 7.415072854                       | 2.595479492                             |
| 11.41950807                        | 2.89850304                                  | 0.332618018                               | 7.354807153                       | 2.479203511                             |
| 21.99518153                        | 3.293939478                                 | 0.246399626                               | 8.185554504                       | 3.657089243                             |
| 18.37421755                        | 3.182602179                                 | 0.281776172                               | 7.988651463                       | 3.264590386                             |
| 25.60846828                        | 3.361540738                                 | 0.232697107                               | 7.939573579                       | 3.985535511                             |
| 13.79911996                        | 3.0051599                                   | 0.296089417                               | 7.379997226                       | 2.864734598                             |
| 33.02803603                        | 3.544883815                                 | 0.215356044                               | 8.202883235                       | 4.464478396                             |
| 10.77178585                        | 2.839111175                                 | 0.337265345                               | 7.139601828                       | 2.290829732                             |
| 17.59452641                        | 3.158961164                                 | 0.278594504                               | 7.810259069                       | 3.202008423                             |
| 29.30500186                        | 3.444439241                                 | 0.212563155                               | 8.445289914                       | 4.323280705                             |
| 17.89592873                        | 3.146919558                                 | 0.311742499                               | 7.830967975                       | 3.015353761                             |
| 15.21755219                        | 3.076095729                                 | 0.300661751                               | 7.676282836                       | 2.964047908                             |
| 18.34919987                        | 3.177603565                                 | 0.283610115                               | 8.045926975                       | 3.185673822                             |
| 24.53801763                        | 3.371199481                                 | 0.243561922                               | 8.432386321                       | 3.852459032                             |
| 36.98637965                        | 3.494611429                                 | 0.180842088                               | 6.642327282                       | 4.924332584                             |
| 33.18640999                        | 3.500610526                                 | 0.198660264                               | 7.798864683                       | 4.592655344                             |
| 25.30670829                        | 3.38248175                                  | 0.235045953                               | 8.358033439                       | 3.963797957                             |
| 23.49365453                        | 3.343209352                                 | 0.262583906                               | 8.213005408                       | 3.677788075                             |
| 13.18533185                        | 2.984736369                                 | 0.308344618                               | 7.722958759                       | 2.774367798                             |
| 20.19309302                        | 3.195215774                                 | 0.265617416                               | 7.739205721                       | 3.452833452                             |
| 25.78141476                        | 3.395570031                                 | 0.23940805                                | 8.196760699                       | 3.947396714                             |
| 18.62826815                        | 3.182847391                                 | 0.291774105                               | 7.828399095                       | 3.172172948                             |
| 32.88383888                        | 3.548290874                                 | 0.201685758                               | 8.505379879                       | 4.54834564                              |
| 27.0475798                         | 3.384713398                                 | 0.222569455                               | 8.297895579                       | 4.132864293                             |
| 33.35693645                        | 3.557364001                                 | 0.205013542                               | 8.57380494                        | 4.546692499                             |
| 21.9903919                         | 3.294327153                                 | 0.250148633                               | 8.184922053                       | 3.658231122                             |
| 11.02131627                        | 2.841274027                                 | 0.34108811                                | 7.054612924                       | 2.447687782                             |
| 20.01974131                        | 3.257767818                                 | 0.260624301                               | 8.225275901                       | 3.469459678                             |
| 26.38066891                        | 3.389950483                                 | 0.22108907                                | 7.965613776                       | 4.075715947                             |
| 36.37371356                        | 3.517616898                                 | 0.179450736                               | 6.861840763                       | 4.800979485                             |
| 40.1423887                         | 3.674569947                                 | 0.197190779                               | 8.186164628                       | 4.971874087                             |
| 16.52217858                        | 3.134706733                                 | 0.28333964                                | 7.920962485                       | 3.077457563                             |
| 28.40630173                        | 3.409511518                                 | 0.218910023                               | 7.980428007                       | 4.246746811                             |
| 24.28344321                        | 3.364271805                                 | 0.252323485                               | 8.304520823                       | 3.757947303                             |
| 16.91164919                        | 3.123881234                                 | 0.262614332                               | 7.623318259                       | 3.204672637                             |
| 16.06600247                        | 3.018297784                                 | 0.320125097                               | 7.479567681                       | 2.721149894                             |
| 36.91681992                        | 3.619345893                                 | 0.192139499                               | 8.544469369                       | 4.841308923                             |
| 39.67788398                        | 3.601912906                                 | 0.189728116                               | 8.716315666                       | 4.987242509                             |
| 31.68170665                        | 3.51967669                                  | 0.217406888                               | 8.396937045                       | 4.385282662                             |
| 20.10021278                        | 3.23372414                                  | 0.265568379                               | 7.999265326                       | 3.469223983                             |
| 14.08279827                        | 2.950191141                                 | 0.273209328                               | 7.53978995                        | 2.988215632                             |
| 27.93519038                        | 3.472872068                                 | 0.231049797                               | 8.412370346                       | 4.094288884                             |
| 24.67579994                        | 3.392503206                                 | 0.251224566                               | 8.489073476                       | 3.774394885                             |
| 11.85692268                        | 2.890052261                                 | 0.32742946                                | 7.283178657                       | 2.52369219                              |
| 12.50739249                        | 2.881539057                                 | 0.347000721                               | 7.150450573                       | 2.45158204                              |
| 29.9873193                         | 3.408696662                                 | 0.203004512                               | 7.47009278                        | 4.404922064                             |
| 25.58937234                        | 3.397983631                                 | 0.25378492                                | 8.221461881                       | 3.839593199                             |
| 36.4808363                         | 3.561210625                                 | 0.200474342                               | 7.946375687                       | 4.77151748                              |
| 29.21980883                        | 3.497031047                                 | 0.237312173                               | 8.616491252                       | 4.137974919                             |
| 30.41348207                        | 3.449360479                                 | 0.200160448                               | 8.025405207                       | 4.46782819                              |
| 24.90083433                        | 3.387308033                                 | 0.247623704                               | 8.306721491                       | 3.856552445                             |
| 27.87597963                        | 3.420155903                                 | 0.2388379                                 | 8.383094578                       | 4.03252652                              |
| 30.19017421                        | 3.494157507                                 | 0.212824306                               | 8.424373455                       | 4.353954582                             |
| 17.62198486                        | 3.15841764                                  | 0.29687917                                | 7.855847063                       | 3.074036883                             |
| 14.54811919                        | 3.029516728                                 | 0.315480247                               | 7.594155649                       | 2.772580869                             |
| 14.49635541                        | 3.017270936                                 | 0.330753739                               | 7.61443676                        | 2.679594029                             |
| 39.72093404                        | 3.629992411                                 | 0.190368486                               | 8.580908131                       | 5.012566111                             |
| 25.3297779                         | 3.35435381                                  | 0.238523856                               | 8.114943579                       | 3.936322156                             |
| 32.45064489                        | 3.518820525                                 | 0.203629444                               | 8.217967415                       | 4.554124992                             |
| 30.108123                          | 3.4733201                                   | 0.216792128                               | 8.404477897                       | 4.307085067                             |
| 19.90800548                        | 3.244524313                                 | 0.256244474                               | 8.066279062                       | 3.492713637                             |
| 50.64626076                        | 3.746379521                                 | 0.168488917                               | 8.452363172                       | 5.742944083                             |
| 34.0452893                         | 3.573973391                                 | 0.198661124                               | 8.568064269                       | 4.660190405                             |
| 25.9105397                         | 3.410595071                                 | 0.246620396                               | 8.372311301                       | 3.875444945                             |
| 26.49449354                        | 3.327553063                                 | 0.226492799                               | 8.822218113                       | 4.078241684                             |
| 18.52516993                        | 3.178298357                                 | 0.273364612                               | 7.970816034                       | 3.288932817                             |
| 14.0763345                         | 3.011910487                                 | 0.324334724                               | 7.626759868                       | 2.749014992                             |
| 30.65537245                        | 3.497494718                                 | 0.213877193                               | 8.282715072                       | 4.400476007                             |
| 44.42837798                        | 3.743336513                                 | 0.180789223                               | 8.889773518                       | 5.329440069                             |
| 15.4002983                         | 2.915687036                                 | 0.292511308                               | 6.661893992                       | 3.064228408                             |
| 27.55114014                        | 3.245305434                                 | 0.21190219                                | 6.397708961                       | 4.167856757                             |
| 23.65659039                        | 3.342995411                                 | 0.27164994                                | 8.208180948                       | 3.57041963                              |
| 36.79081774                        | 3.63049423                                  | 0.199417679                               | 8.271417567                       | 4.734789716                             |
| 14.10049529                        | 3.027072992                                 | 0.302304759                               | 7.496345176                       | 2.804355545                             |
| 16.74020938                        | 3.129248111                                 | 0.293402496                               | 7.862598861                       | 3.053346466                             |
| 14.08944345                        | 3.023166524                                 | 0.318686918                               | 7.683395812                       | 2.777511913                             |
| 59.53987664                        | 3.803947213                                 | 0.152810313                               | 7.861291532                       | 6.239281319                             |
| 22.2371569                         | 3.310070756                                 | 0.258886687                               | 8.155813458                       | 3.639284224                             |
| 35.30203335                        | 3.415651367                                 | 0.179004766                               | 6.814639955                       | 4.833245719                             |
| 15.02577993                        | 3.01632416                                  | 0.286631327                               | 7.458807864                       | 3.063026569                             |
| 29.7235616                         | 3.474633957                                 | 0.250022147                               | 8.132348386                       | 4.065539486                             |



| log.sigma.4.0.mm.3D_glc_m_DifferenceVariance | log.sigma.4.0.mm.3D_glc_m_ldn | log.sigma.4.0.mm.3D_glc_m_ldm | log.sigma.4.0.mm.3D_glc_m_Correlation | log.sigma.4.0.mm.3D_glc_m_Autocorrelation |
|----------------------------------------------|-------------------------------|-------------------------------|---------------------------------------|-------------------------------------------|
| 9.756089179                                  | 0.894434127                   | 0.210880712                   | 0.595888321                           | 270.4801963                               |
| 8.575570867                                  | 0.917208312                   | 0.328721665                   | 0.573658649                           | 193.3198592                               |
| 7.024199852                                  | 0.880183886                   | 0.247817116                   | 0.53886811                            | 119.0959411                               |
| 9.651196528                                  | 0.904865372                   | 0.231485978                   | 0.548342765                           | 344.2893985                               |
| 10.9324492                                   | 0.883430819                   | 0.203622796                   | 0.662823077                           | 326.9664969                               |
| 6.328579864                                  | 0.876838084                   | 0.241711969                   | 0.541068993                           | 146.8361299                               |
| 4.37074247                                   | 0.892197489                   | 0.324344153                   | 0.593971697                           | 89.79817672                               |
| 13.73815312                                  | 0.888280449                   | 0.175308536                   | 0.554068801                           | 299.5425714                               |
| 11.82253732                                  | 0.900369385                   | 0.214223858                   | 0.588843532                           | 335.141166                                |
| 7.360805894                                  | 0.912792527                   | 0.292333069                   | 0.590869097                           | 210.2918805                               |
| 7.373476023                                  | 0.8732873                     | 0.224120376                   | 0.520404902                           | 172.3476752                               |
| 8.086949563                                  | 0.900931101                   | 0.248433908                   | 0.623950856                           | 191.363187                                |
| 6.542069302                                  | 0.903227933                   | 0.285637257                   | 0.674664982                           | 148.8854195                               |
| 7.283603722                                  | 0.888755616                   | 0.23739429                    | 0.619621488                           | 186.5468322                               |
| 7.79184055                                   | 0.889154729                   | 0.243190849                   | 0.586212772                           | 168.6890585                               |
| 6.024190428                                  | 0.946022566                   | 0.488638734                   | 0.620682054                           | 196.2197912                               |
| 9.269456212                                  | 0.880285436                   | 0.197676672                   | 0.56982662                            | 234.1341801                               |
| 9.92024871                                   | 0.896038466                   | 0.249950693                   | 0.609171389                           | 180.0482748                               |
| 12.20668134                                  | 0.880410715                   | 0.18415505                    | 0.571265007                           | 315.0210428                               |
| 5.630377313                                  | 0.912362273                   | 0.35966717                    | 0.595825888                           | 101.2246843                               |
| 5.096059306                                  | 0.929992742                   | 0.361097258                   | 0.577022903                           | 191.483927                                |
| 8.073242305                                  | 0.907994318                   | 0.239717737                   | 0.612251308                           | 168.1718199                               |
| 7.306495356                                  | 0.910240298                   | 0.27839687                    | 0.597956173                           | 186.2930963                               |
| 9.036711041                                  | 0.88965369                    | 0.21785534                    | 0.61209116                            | 340.742753                                |
| 5.317699602                                  | 0.892216751                   | 0.300434212                   | 0.510495099                           | 82.79562428                               |
| 12.25874537                                  | 0.885607393                   | 0.212427939                   | 0.495632308                           | 183.6124097                               |
| 5.361140709                                  | 0.935422578                   | 0.40494907                    | 0.618562853                           | 234.53376                                 |
| 6.896392824                                  | 0.903672037                   | 0.286151237                   | 0.60077063                            | 125.9840595                               |
| 9.586110839                                  | 0.878184577                   | 0.209567052                   | 0.588977324                           | 249.6923709                               |
| 8.449213053                                  | 0.923950945                   | 0.34138072                    | 0.590730199                           | 208.3555724                               |
| 6.112277379                                  | 0.909921318                   | 0.303708233                   | 0.573590939                           | 140.1243415                               |
| 7.609618033                                  | 0.919369139                   | 0.305723931                   | 0.618689671                           | 210.419528                                |
| 9.122871389                                  | 0.896099005                   | 0.23629707                    | 0.611188232                           | 218.5426539                               |
| 11.62637545                                  | 0.85136994                    | 0.173745093                   | 0.484035267                           | 203.1046421                               |
| 11.04598119                                  | 0.875476931                   | 0.191167886                   | 0.5321545                             | 322.3613235                               |
| 8.96208115                                   | 0.896027647                   | 0.227753902                   | 0.582192681                           | 251.964942                                |
| 9.484632779                                  | 0.905930602                   | 0.262679135                   | 0.593359296                           | 166.523648                                |
| 5.243272905                                  | 0.90608627                    | 0.315270457                   | 0.650142868                           | 137.8719802                               |
| 7.401869916                                  | 0.905625705                   | 0.264823908                   | 0.600600424                           | 251.8103432                               |
| 9.666822713                                  | 0.893939918                   | 0.23087065                    | 0.561469513                           | 201.8704449                               |
| 8.201196045                                  | 0.923707215                   | 0.299415346                   | 0.569751329                           | 248.3028617                               |
| 11.35054396                                  | 0.888818292                   | 0.197206161                   | 0.587604468                           | 265.478678                                |
| 8.814265367                                  | 0.88276182                    | 0.213444401                   | 0.551480722                           | 222.2384042                               |
| 11.61045512                                  | 0.886296391                   | 0.201129663                   | 0.596825884                           | 256.3464036                               |
| 8.121748553                                  | 0.900427318                   | 0.2426551                     | 0.56651879                            | 262.2420393                               |
| 4.744679581                                  | 0.910252579                   | 0.360866532                   | 0.554163644                           | 85.7228713                                |
| 7.621012856                                  | 0.904978048                   | 0.255130809                   | 0.59257248                            | 231.1930119                               |
| 9.024519894                                  | 0.877170488                   | 0.222077376                   | 0.556907498                           | 156.3217727                               |
| 12.23026272                                  | 0.863577045                   | 0.193106845                   | 0.443904306                           | 246.9487296                               |
| 14.31576713                                  | 0.893575586                   | 0.191469255                   | 0.584897977                           | 410.1277503                               |
| 6.714867158                                  | 0.914851782                   | 0.301275886                   | 0.616824094                           | 177.3066921                               |
| 9.182411937                                  | 0.855371701                   | 0.217823538                   | 0.538289698                           | 168.9321185                               |
| 9.48376963                                   | 0.910940736                   | 0.260692944                   | 0.549650632                           | 230.2416265                               |
| 6.32770291                                   | 0.893302579                   | 0.272395069                   | 0.596563484                           | 153.8097562                               |
| 8.155821294                                  | 0.923517441                   | 0.396069402                   | 0.59516243                            | 162.2888146                               |
| 12.50910026                                  | 0.882721801                   | 0.182338145                   | 0.530133205                           | 252.8911975                               |
| 12.24359182                                  | 0.882873039                   | 0.182363219                   | 0.484257393                           | 310.0031209                               |
| 11.32755632                                  | 0.900119626                   | 0.213559851                   | 0.534825895                           | 381.8160774                               |
| 7.692485298                                  | 0.896499795                   | 0.257088887                   | 0.627461958                           | 180.1050552                               |
| 4.656433001                                  | 0.887269715                   | 0.272481836                   | 0.611632614                           | 128.666231                                |
| 10.67194955                                  | 0.890779492                   | 0.230341383                   | 0.575903604                           | 178.9733848                               |
| 9.850938021                                  | 0.916616399                   | 0.259069088                   | 0.614624338                           | 263.2653343                               |
| 5.111156135                                  | 0.924672764                   | 0.364894879                   | 0.584579498                           | 147.6286966                               |
| 6.201488043                                  | 0.922958515                   | 0.396292524                   | 0.554252625                           | 190.626429                                |
| 9.92377349                                   | 0.872256524                   | 0.190795315                   | 0.534840926                           | 226.3685179                               |
| 10.21381487                                  | 0.90486043                    | 0.256308299                   | 0.553988448                           | 234.5179534                               |
| 12.36279368                                  | 0.884434523                   | 0.19191531                    | 0.52976892                            | 297.0965413                               |
| 11.49008684                                  | 0.890265773                   | 0.240195391                   | 0.60015216                            | 191.830591                                |
| 9.605582271                                  | 0.870553522                   | 0.190524688                   | 0.568353744                           | 185.0342848                               |
| 9.46091936                                   | 0.89331138                    | 0.241383819                   | 0.57310362                            | 181.0207825                               |
| 10.1729734                                   | 0.900661376                   | 0.246186246                   | 0.557389451                           | 229.3927214                               |
| 10.40043873                                  | 0.884267594                   | 0.208100474                   | 0.580754416                           | 192.7294151                               |
| 7.730118136                                  | 0.913271472                   | 0.319762723                   | 0.576778149                           | 148.2651646                               |
| 6.572900013                                  | 0.925102709                   | 0.346964608                   | 0.571351118                           | 240.900892                                |
| 7.080926546                                  | 0.927811111                   | 0.3630385                     | 0.617946438                           | 188.3990874                               |
| 12.66437519                                  | 0.89241752                    | 0.181386714                   | 0.513104098                           | 303.2641441                               |
| 8.878210705                                  | 0.899467174                   | 0.228740361                   | 0.535097075                           | 196.1184548                               |
| 10.83701213                                  | 0.869078689                   | 0.193400732                   | 0.576058622                           | 148.6832118                               |
| 10.37476892                                  | 0.885679868                   | 0.218582783                   | 0.523160311                           | 241.9484475                               |
| 7.287427246                                  | 0.906818987                   | 0.255419227                   | 0.571553745                           | 231.0687825                               |
| 15.47111487                                  | 0.867767409                   | 0.155792459                   | 0.495612003                           | 291.5271042                               |
| 11.44156974                                  | 0.891642152                   | 0.189812867                   | 0.531935369                           | 306.0830134                               |
| 10.14691215                                  | 0.90859726                    | 0.254536728                   | 0.562381575                           | 319.3541316                               |
| 9.162051998                                  | 0.864732416                   | 0.218017709                   | 0.448967226                           | 208.2806831                               |
| 7.106371384                                  | 0.901395746                   | 0.276018935                   | 0.571311633                           | 142.3240006                               |
| 6.203405136                                  | 0.92117353                    | 0.337187509                   | 0.600479302                           | 218.6702133                               |
| 10.61186046                                  | 0.886175031                   | 0.202857063                   | 0.597269074                           | 192.9817045                               |
| 14.72685735                                  | 0.881507924                   | 0.17035017                    | 0.5378525                             | 437.5894057                               |
| 4.821611605                                  | 0.885585724                   | 0.279137424                   | 0.529743183                           | 172.4356361                               |
| 8.814721598                                  | 0.86670241                    | 0.214576769                   | 0.470768835                           | 144.9276995                               |
| 10.22346562                                  | 0.915620938                   | 0.294041346                   | 0.559201382                           | 270.0390515                               |
| 13.5409457                                   | 0.882665263                   | 0.195946667                   | 0.529878313                           | 153.1376285                               |
| 5.983273251                                  | 0.899007442                   | 0.329303243                   | 0.581537884                           | 125.1209407                               |
| 6.985037161                                  | 0.910754058                   | 0.306906551                   | 0.577794626                           | 163.1324433                               |
| 6.128584042                                  | 0.90986117                    | 0.331144884                   | 0.608816864                           | 128.5122376                               |
| 16.90945905                                  | 0.861673103                   | 0.147671199                   | 0.562658988                           | 380.062549                                |
| 8.53995834                                   | 0.898392668                   | 0.250887909                   | 0.586269872                           | 300.9985001                               |
| 10.39779824                                  | 0.838493504                   | 0.180367973                   | 0.416174743                           | 146.938887                                |
| 5.319300735                                  | 0.893238202                   | 0.270159304                   | 0.669179383                           | 174.2315354                               |
| 12.47295034                                  | 0.91150143                    | 0.244604644                   | 0.556383527                           | 307.539211                                |

| log.sigma.4.0.mm.3D_glcm_SumEntropy | log.sigma.4.0.mm.3D_glcm_AverageIntensity | log.sigma.4.0.mm.3D_glcm_Energy | log.sigma.4.0.mm.3D_glcm_SumSquares | log.sigma.4.0.mm.3D_glcm_ClusterProminence |
|-------------------------------------|-------------------------------------------|---------------------------------|-------------------------------------|--------------------------------------------|
| 5.361647873                         | 15.93940041                               | 0.004211259                     | 36.77297826                         | 37639.56846                                |
| 5.025147186                         | 13.52251052                               | 0.007636495                     | 22.83169315                         | 16247.20966                                |
| 4.933618201                         | 10.3568784                                | 0.006951563                     | 21.80009113                         | 11606.03318                                |
| 5.265921702                         | 18.30118794                               | 0.003728967                     | 29.36012546                         | 23349.95438                                |
| 5.465813153                         | 17.3115414                                | 0.004659716                     | 46.74720765                         | 57392.29314                                |
| 4.940937029                         | 11.65551524                               | 0.005547283                     | 20.33824247                         | 9135.450973                                |
| 4.654019845                         | 9.0034851                                 | 0.010718634                     | 14.73163492                         | 6723.402855                                |
| 5.52586852                          | 16.81559041                               | 0.002913715                     | 45.19729167                         | 52485.07584                                |
| 5.456681824                         | 17.88360657                               | 0.00316377                      | 38.31740958                         | 44099.64198                                |
| 5.048795553                         | 14.14762185                               | 0.005889919                     | 22.40390545                         | 13941.76201                                |
| 5.048723692                         | 12.63842068                               | 0.005059739                     | 24.29694132                         | 12566.72486                                |
| 5.266587938                         | 13.24607099                               | 0.004355267                     | 30.36843273                         | 25628.33713                                |
| 5.166528154                         | 11.47550594                               | 0.005249024                     | 25.9610203                          | 21614.00539                                |
| 5.195996858                         | 13.03451456                               | 0.004408287                     | 27.31167567                         | 18093.26823                                |
| 5.135885853                         | 12.44258927                               | 0.005084841                     | 26.41821483                         | 19373.47287                                |
| 4.547427356                         | 13.74230668                               | 0.029542255                     | 13.67362641                         | 9324.152242                                |
| 5.315151658                         | 14.76003979                               | 0.004158458                     | 35.66795856                         | 28737.53321                                |
| 5.332340818                         | 12.74543547                               | 0.003929191                     | 34.09486363                         | 31768.29102                                |
| 4.543754536                         | 17.27187353                               | 0.003703305                     | 44.87257675                         | 49960.63027                                |
| 4.79762643                          | 9.588117644                               | 0.009248399                     | 15.58651981                         | 8217.329858                                |
| 4.721165854                         | 13.58973169                               | 0.009691183                     | 13.86602312                         | 6200.806926                                |
| 5.217644263                         | 12.3474812                                | 0.00440497                      | 28.85207259                         | 25488.07439                                |
| 5.081291094                         | 13.21300842                               | 0.005776939                     | 23.47973791                         | 16559.31534                                |
| 5.232111829                         | 18.09697353                               | 0.005145625                     | 33.25052753                         | 29639.07203                                |
| 4.694789518                         | 8.694818374                               | 0.007896482                     | 14.08794791                         | 5154.11123                                 |
| 5.225152479                         | 13.08076929                               | 0.004333097                     | 33.93422598                         | 26164.80044                                |
| 4.694501617                         | 15.07907996                               | 0.016611726                     | 14.57063612                         | 8173.042712                                |
| 5.024733163                         | 10.6343567                                | 0.005986683                     | 22.29776302                         | 14102.95585                                |
| 5.34951334                          | 15.20364799                               | 0.003487446                     | 36.38358105                         | 26955.0827                                 |
| 5.046774034                         | 14.08431196                               | 0.00760789                      | 22.5204696                          | 15541.84772                                |
| 4.880875965                         | 11.40564107                               | 0.007219458                     | 18.01068438                         | 11138.24868                                |
| 5.140075314                         | 14.10377789                               | 0.005812852                     | 24.80964342                         | 18058.70176                                |
| 5.331321163                         | 14.2179591                                | 0.003644229                     | 32.3770904                          | 26367.85599                                |
| 4.857152208                         | 13.63404036                               | 0.010864939                     | 36.18554258                         | 24716.01426                                |
| 5.195558661                         | 17.61071779                               | 0.005571035                     | 35.98120663                         | 31003.87871                                |
| 5.263188348                         | 15.44778256                               | 0.003761973                     | 31.01882374                         | 21201.84706                                |
| 5.210773723                         | 12.34385674                               | 0.004572887                     | 30.06246817                         | 23302.93918                                |
| 4.974114759                         | 11.20801327                               | 0.006276721                     | 18.83699389                         | 9903.87678                                 |
| 5.071589129                         | 15.45280794                               | 0.006823356                     | 25.55653663                         | 22184.80294                                |
| 5.214430013                         | 13.68422848                               | 0.004405999                     | 29.90146502                         | 22208.1343                                 |
| 5.028149264                         | 15.51872771                               | 0.0064956                       | 22.15728154                         | 14420.2038                                 |
| 5.433781837                         | 15.69314924                               | 0.003390744                     | 40.35187795                         | 41200.50444                                |
| 5.224924888                         | 14.38763929                               | 0.003841484                     | 30.37912747                         | 19298.97454                                |
| 5.473398579                         | 15.37749969                               | 0.003302314                     | 41.89434632                         | 44768.33493                                |
| 5.153033925                         | 15.85381338                               | 0.004430959                     | 26.00708897                         | 17544.40438                                |
| 4.56762343                          | 8.878804446                               | 0.011031155                     | 12.39155126                         | 4728.640308                                |
| 5.165542007                         | 14.81155724                               | 0.00435924                      | 25.25728806                         | 16110.74136                                |
| 5.170698582                         | 11.83657056                               | 0.004885411                     | 29.97023218                         | 19792.821                                  |
| 4.870181045                         | 15.33333465                               | 0.009773731                     | 33.35257526                         | 23459.71339                                |
| 5.499083677                         | 19.77533904                               | 0.004655763                     | 46.83232789                         | 71712.12719                                |
| 5.059970982                         | 12.85090037                               | 0.005999351                     | 22.07949556                         | 14353.87329                                |
| 5.137263763                         | 12.34623057                               | 0.00488536                      | 30.6670722                          | 16839.74315                                |
| 5.189945412                         | 14.83400075                               | 0.004491641                     | 27.59716675                         | 23040.80124                                |
| 4.972676919                         | 11.89120558                               | 0.006597846                     | 20.8419974                          | 12610.81127                                |
| 4.879493686                         | 12.32364397                               | 0.01393267                      | 20.11788929                         | 13574.50547                                |
| 5.406769317                         | 15.44738979                               | 0.003262035                     | 39.93167565                         | 36343.37814                                |
| 5.392170425                         | 17.39133231                               | 0.002912354                     | 38.31605164                         | 31518.40696                                |
| 5.302870951                         | 19.32559553                               | 0.004156945                     | 32.90232476                         | 32245.32872                                |
| 5.186249656                         | 12.80508199                               | 0.004979152                     | 27.5396908                          | 21200.61199                                |
| 4.904225091                         | 10.8438245                                | 0.006560568                     | 18.09365045                         | 8151.990374                                |
| 5.29459281                          | 12.73124139                               | 0.003888429                     | 33.80809481                         | 27722.15797                                |
| 5.341534952                         | 15.80892303                               | 0.003856252                     | 32.08066067                         | 35715.1546                                 |
| 4.7150839                           | 11.81571107                               | 0.011020019                     | 14.4059748                          | 8465.61117                                 |
| 4.676072441                         | 13.53106171                               | 0.012770626                     | 14.26761512                         | 7097.997421                                |
| 5.066305297                         | 14.55268987                               | 0.006501669                     | 33.12633352                         | 23821.44778                                |
| 5.207315855                         | 14.95002175                               | 0.004691956                     | 29.53754489                         | 24585.87597                                |
| 5.279370982                         | 16.77470082                               | 0.005173955                     | 38.94629712                         | 40351.29098                                |
| 5.41660226                          | 13.11125699                               | 0.003269212                     | 37.51507832                         | 34613.21514                                |
| 5.262606006                         | 12.88344398                               | 0.004542684                     | 35.54127232                         | 27592.99051                                |
| 5.231954408                         | 12.89964753                               | 0.004133812                     | 30.01956757                         | 22425.59643                                |
| 5.281440693                         | 14.74271327                               | 0.004059435                     | 32.10683958                         | 23964.68581                                |
| 5.362347234                         | 13.19886332                               | 0.003477188                     | 36.80043475                         | 30350.70446                                |
| 4.990209871                         | 11.71929239                               | 0.00662113                      | 21.23939379                         | 13623.86162                                |
| 4.864617858                         | 15.30125942                               | 0.007745229                     | 17.57985161                         | 8401.743722                                |
| 4.903942086                         | 13.3588002                                | 0.010782388                     | 19.57835329                         | 15102.2457                                 |
| 5.419427355                         | 17.10994056                               | 0.003214687                     | 40.52560057                         | 42008.81026                                |
| 5.134109463                         | 13.59339779                               | 0.004449071                     | 27.98525314                         | 17944.72227                                |
| 5.33347329                          | 11.32198842                               | 0.003922806                     | 39.36995962                         | 35848.97836                                |
| 5.263259943                         | 15.21183642                               | 0.003752303                     | 32.8069069                          | 21745.48899                                |
| 5.087439288                         | 14.86563764                               | 0.004773494                     | 23.94768097                         | 13688.54938                                |
| 5.495840348                         | 16.61739931                               | 0.003380898                     | 51.05430382                         | 54962.50099                                |
| 5.370716148                         | 17.16542429                               | 0.003153743                     | 36.26593544                         | 29501.57814                                |
| 5.257832137                         | 17.6104392                                | 0.004260549                     | 29.47942125                         | 25521.76644                                |
| 4.758774905                         | 14.05833286                               | 0.010663301                     | 23.79996392                         | 12843.37027                                |
| 5.034666073                         | 11.40772206                               | 0.005221326                     | 21.79745235                         | 13213.4281                                 |
| 4.883841476                         | 14.48844248                               | 0.008243551                     | 18.20780731                         | 10304.55794                                |
| 5.364438934                         | 13.1581015                                | 0.003936498                     | 38.93765637                         | 35993.96626                                |
| 5.563577283                         | 20.58800864                               | 0.002598001                     | 46.19855531                         | 52313.58641                                |
| 4.550565702                         | 12.78053157                               | 0.012126689                     | 16.7607301                          | 6084.759952                                |
| 4.570577365                         | 11.53720855                               | 0.013470561                     | 25.44978751                         | 16526.86687                                |
| 5.173323451                         | 16.12102101                               | 0.006332222                     | 27.1870004                          | 24769.0784                                 |
| 5.314755673                         | 11.68001317                               | 0.003953687                     | 40.82916601                         | 34471.68058                                |
| 4.837068435                         | 10.73717668                               | 0.008329386                     | 16.87842976                         | 7978.128659                                |
| 4.984854514                         | 12.3425722                                | 0.006347184                     | 20.15325597                         | 12755.67133                                |
| 4.915277769                         | 10.84079355                               | 0.007279281                     | 18.07109866                         | 9634.12165                                 |
| 5.548142325                         | 18.8660009                                | 0.00493417                      | 67.89823082                         | 100730.1264                                |
| 5.187935195                         | 16.99365057                               | 0.004674924                     | 27.37471011                         | 20126.56243                                |
| 4.767048825                         | 11.61221756                               | 0.00971744                      | 29.6549019                          | 16075.07828                                |
| 5.026408559                         | 12.61522569                               | 0.007257755                     | 22.5604702                          | 14282.68209                                |
| 5.265398992                         | 17.28880543                               | 0.004847729                     | 34.2963762                          | 36218.13472                                |

| log.sigma.4.0.mm.3D_glc_m_SumAverage | log.sigma.4.0.mm.3D_glc_m_Irc2 | log.sigma.4.0.mm.3D_glc_m_Irc1 | log.sigma.4.0.mm.3D_glc_m_DifferenceAverage | log.sigma.4.0.mm.3D_glc_m_Id |
|--------------------------------------|--------------------------------|--------------------------------|---------------------------------------------|------------------------------|
| 31.56610935                          | 0.914909546                    | -0.201358463                   | 4.280372342                                 | 0.303757618                  |
| 26.88717783                          | 0.825043269                    | -0.144209407                   | 3.124460407                                 | 0.403699863                  |
| 20.7137568                           | 0.890487826                    | -0.195398353                   | 3.524190994                                 | 0.339562609                  |
| 36.23407786                          | 0.765043265                    | -0.108742509                   | 4.031265495                                 | 0.321590341                  |
| 34.43266416                          | 0.967163149                    | -0.293556936                   | 4.402033097                                 | 0.297256942                  |
| 23.31103048                          | 0.821403171                    | -0.140518121                   | 3.469205826                                 | 0.335593429                  |
| 18.0069702                           | 0.901357322                    | -0.225825287                   | 2.622818883                                 | 0.405267358                  |
| 33.14489235                          | 0.878087655                    | -0.159518605                   | 5.097123368                                 | 0.269659107                  |
| 35.36325382                          | 0.816048184                    | -0.124324603                   | 4.374133614                                 | 0.305676707                  |
| 28.11863704                          | 0.77619366                     | -0.11812714                    | 3.169243993                                 | 0.375971772                  |
| 25.27684136                          | 0.822383903                    | -0.138863917                   | 3.899285899                                 | 0.317237453                  |
| 26.31572858                          | 0.840388286                    | -0.148497769                   | 3.645715592                                 | 0.33870904                   |
| 22.92956621                          | 0.830521564                    | -0.149324551                   | 3.104249347                                 | 0.372329207                  |
| 26.05505523                          | 0.83319091                     | -0.143202539                   | 3.614993849                                 | 0.330747959                  |
| 24.795983                            | 0.847829926                    | -0.15260367                    | 3.616587029                                 | 0.335068415                  |
| 27.41991532                          | 0.856163369                    | -0.188289279                   | 1.986667173                                 | 0.539750757                  |
| 29.29120105                          | 0.896919858                    | -0.187011526                   | 4.375077597                                 | 0.292691036                  |
| 25.30032688                          | 0.815808907                    | -0.132630823                   | 3.880558187                                 | 0.337091857                  |
| 34.05127146                          | 0.93074992                     | -0.218444115                   | 4.953947583                                 | 0.277438952                  |
| 19.17623529                          | 0.779994559                    | -0.128441729                   | 2.595479492                                 | 0.433837637                  |
| 27.10793425                          | 0.735773573                    | -0.110245618                   | 2.479203511                                 | 0.435547687                  |
| 24.57371803                          | 0.820636934                    | -0.135804969                   | 3.657089243                                 | 0.332072888                  |
| 26.2893131                           | 0.78096343                     | -0.119889918                   | 3.264590386                                 | 0.364549132                  |
| 35.82988028                          | 0.919021132                    | -0.213176093                   | 3.985535511                                 | 0.3128033                    |
| 17.38963675                          | 0.74325975                     | -0.111214152                   | 2.864734598                                 | 0.386018818                  |
| 25.89405864                          | 0.882473479                    | -0.170680965                   | 4.464478396                                 | 0.303658756                  |
| 30.05450613                          | 0.810080758                    | -0.148027106                   | 2.290829732                                 | 0.472187814                  |
| 21.23716735                          | 0.807563264                    | -0.136839093                   | 3.202008423                                 | 0.371557827                  |
| 30.24764633                          | 0.818586264                    | -0.132849885                   | 4.323280705                                 | 0.302093087                  |
| 27.96864858                          | 0.831551651                    | -0.146486813                   | 3.015353761                                 | 0.41459492                   |
| 22.79346772                          | 0.740961794                    | -0.108876463                   | 2.964047908                                 | 0.386547221                  |
| 27.97690502                          | 0.782338402                    | -0.126170272                   | 3.185673822                                 | 0.386724975                  |
| 28.24205688                          | 0.807944817                    | -0.125543927                   | 3.852459032                                 | 0.327101591                  |
| 27.23878424                          | 0.990374957                    | -0.460722767                   | 4.924332584                                 | 0.269709601                  |
| 34.8642835                           | 0.953109223                    | -0.265867337                   | 4.592655344                                 | 0.286230323                  |
| 30.62645646                          | 0.794886937                    | -0.119994639                   | 3.963797957                                 | 0.319286232                  |
| 24.45505057                          | 0.786152215                    | -0.119643717                   | 3.677788075                                 | 0.348539907                  |
| 22.41602654                          | 0.784145499                    | -0.126283808                   | 2.774367798                                 | 0.397591999                  |
| 30.77732581                          | 0.87536512                     | -0.184388379                   | 3.452833452                                 | 0.352724517                  |
| 27.24228634                          | 0.839363733                    | -0.142884993                   | 3.947396714                                 | 0.32203885                   |
| 30.7351301                           | 0.828581621                    | -0.14400719                    | 3.172172948                                 | 0.381887616                  |
| 31.12460966                          | 0.877180355                    | -0.163672238                   | 4.54834564                                  | 0.291222813                  |
| 28.69297906                          | 0.799478801                    | -0.123995466                   | 4.132864293                                 | 0.306980725                  |
| 30.4660973                           | 0.879477914                    | -0.16377042                    | 4.546692499                                 | 0.294275068                  |
| 31.4954597                           | 0.78619916                     | -0.118183408                   | 3.658231122                                 | 0.333864336                  |
| 17.75760889                          | 0.738484146                    | -0.117261542                   | 2.447687782                                 | 0.435000368                  |
| 29.44378322                          | 0.744020045                    | -0.101857579                   | 3.469459678                                 | 0.345403792                  |
| 23.64395501                          | 0.883636659                    | -0.178206148                   | 4.075715947                                 | 0.314470913                  |
| 30.48457723                          | 0.982872187                    | -0.398524079                   | 4.800979485                                 | 0.286918872                  |
| 39.09372978                          | 0.9522723                      | -0.254683642                   | 4.971874087                                 | 0.282697494                  |
| 25.61622206                          | 0.77994006                     | -0.121351875                   | 3.077457563                                 | 0.384652214                  |
| 24.69246113                          | 0.834565125                    | -0.14664188                    | 4.246746811                                 | 0.308835041                  |
| 29.36475352                          | 0.75174962                     | -0.106216477                   | 3.757947303                                 | 0.346505262                  |
| 23.78241116                          | 0.86900044                     | -0.173256991                   | 3.204672637                                 | 0.362316069                  |
| 24.55956344                          | 0.832010447                    | -0.156314884                   | 2.721149894                                 | 0.460556954                  |
| 30.4892546                           | 0.869486322                    | -0.154498555                   | 4.841308923                                 | 0.277103943                  |
| 34.17679986                          | 0.782164583                    | -0.114466428                   | 4.987242509                                 | 0.275836459                  |
| 38.16188902                          | 0.834383637                    | -0.139351574                   | 4.385282662                                 | 0.305048163                  |
| 25.54384746                          | 0.87584631                     | -0.171229599                   | 3.469223983                                 | 0.346512949                  |
| 21.68764899                          | 0.829481474                    | -0.1554978                     | 2.988215632                                 | 0.364455256                  |
| 25.3068445                           | 0.785229191                    | -0.114970976                   | 4.094288884                                 | 0.320479292                  |
| 31.2371126                           | 0.78254602                     | -0.11541002                    | 3.774394885                                 | 0.345327931                  |
| 23.60886122                          | 0.776085059                    | -0.132028744                   | 2.52369219                                  | 0.437975284                  |
| 27.03892881                          | 0.812097597                    | -0.150207527                   | 2.45158204                                  | 0.461996851                  |
| 28.93221423                          | 0.970631169                    | -0.321645078                   | 4.404922064                                 | 0.287475356                  |
| 29.58478583                          | 0.82201697                     | -0.134356052                   | 3.839593199                                 | 0.342229743                  |
| 33.2595966                           | 0.947573292                    | -0.254243416                   | 4.77151748                                  | 0.284765967                  |
| 26.06766627                          | 0.788693209                    | -0.114784732                   | 4.137974919                                 | 0.327265869                  |
| 25.70325764                          | 0.921510183                    | -0.212989725                   | 4.46782819                                  | 0.286357294                  |
| 25.64835073                          | 0.790859122                    | -0.117795317                   | 3.856552445                                 | 0.330689863                  |
| 29.14084766                          | 0.783528444                    | -0.119159996                   | 4.03252652                                  | 0.333123456                  |
| 26.22551                             | 0.851333402                    | -0.147200387                   | 4.353954582                                 | 0.300904393                  |
| 23.35993106                          | 0.751963953                    | -0.112560369                   | 3.074036883                                 | 0.398191952                  |
| 30.41570686                          | 0.759040097                    | -0.117316415                   | 2.772580869                                 | 0.421771963                  |
| 26.5908435                           | 0.776776648                    | -0.12438499                    | 2.679594029                                 | 0.434650118                  |
| 33.62133989                          | 0.870297745                    | -0.158417555                   | 5.012566111                                 | 0.274418932                  |
| 26.96384485                          | 0.824825551                    | -0.137484152                   | 3.936322156                                 | 0.320423757                  |
| 22.51122302                          | 0.902842358                    | -0.189356146                   | 4.554124992                                 | 0.287769616                  |
| 30.0448769                           | 0.785173471                    | -0.119803538                   | 4.307085067                                 | 0.309604337                  |
| 29.52299934                          | 0.753730136                    | -0.107520018                   | 3.492713637                                 | 0.345300959                  |
| 32.68459078                          | 0.945850453                    | -0.237422576                   | 5.742944083                                 | 0.248274925                  |
| 33.88312238                          | 0.818147931                    | -0.126610609                   | 4.660190405                                 | 0.284162795                  |
| 34.80716425                          | 0.790819271                    | -0.120752421                   | 3.875444945                                 | 0.341012509                  |
| 28.11666572                          | 0.969331001                    | -0.343009291                   | 4.078241684                                 | 0.310815844                  |
| 22.79814393                          | 0.742616118                    | -0.109461905                   | 3.288932817                                 | 0.363106299                  |
| 28.85602213                          | 0.747523751                    | -0.11381946                    | 2.749014992                                 | 0.413809724                  |
| 26.11448402                          | 0.890457826                    | -0.177430291                   | 4.400476007                                 | 0.296093673                  |
| 40.61282271                          | 0.835514266                    | -0.130571505                   | 5.329440069                                 | 0.263123711                  |
| 25.56106315                          | 0.939782136                    | -0.283024442                   | 3.064228408                                 | 0.366585876                  |
| 23.07441709                          | 0.984713865                    | -0.434658708                   | 4.167856757                                 | 0.308298539                  |
| 31.94623623                          | 0.788271498                    | -0.121327954                   | 3.57041963                                  | 0.373864383                  |
| 23.09688806                          | 0.88831799                     | -0.173848255                   | 4.734789716                                 | 0.288901622                  |
| 21.47435335                          | 0.808722049                    | -0.140118974                   | 2.804355545                                 | 0.408697132                  |
| 24.63516295                          | 0.747508391                    | -0.110888543                   | 3.053346466                                 | 0.388728258                  |
| 21.67946558                          | 0.760982088                    | -0.116122633                   | 2.777511913                                 | 0.409143278                  |
| 36.98710879                          | 0.987164835                    | -0.379522851                   | 6.239281319                                 | 0.238230888                  |
| 33.78866756                          | 0.832602569                    | -0.139676735                   | 3.639284224                                 | 0.339870445                  |
| 23.22443512                          | 0.980820642                    | -0.389866837                   | 4.833245719                                 | 0.275606529                  |
| 25.23045138                          | 0.917540102                    | -0.224613885                   | 3.063026569                                 | 0.360195014                  |
| 34.01763082                          | 0.903362729                    | -0.191537915                   | 4.065539486                                 | 0.331614737                  |

| log.sigma.4.0.mm.3D_glcm_ClusterTendency | log.sigma.4.0.mm.3D_firstorder_InterquartileRange | log.sigma.4.0.mm.3D_firstorder_Skewness | log.sigma.4.0.mm.3D_firstorder_Uniformity |
|------------------------------------------|---------------------------------------------------|-----------------------------------------|-------------------------------------------|
| 114.6125283                              | 211.7598228                                       | 0.22658924                              | 0.047043151                               |
| 69.21251527                              | 138.160099                                        | 0.409110943                             | 0.064789893                               |
| 67.15575664                              | 177.1476393                                       | 0.23284802                              | 0.061001508                               |
| 90.96891448                              | 201.1704254                                       | -0.100402351                            | 0.049565008                               |
| 153.2862273                              | 228.463768                                        | -0.190941384                            | 0.044824295                               |
| 62.59137481                              | 177.4475441                                       | -0.152513293                            | 0.060106567                               |
| 46.86354267                              | 107.2952042                                       | 0.330472953                             | 0.078392871                               |
| 139.9106811                              | 258.2319927                                       | -0.018480702                            | 0.040744858                               |
| 121.526591                               | 215.8842354                                       | 0.14169113                              | 0.043600299                               |
| 68.26369471                              | 152.7299194                                       | 0.520330545                             | 0.062853187                               |
| 73.73442379                              | 200.4367867                                       | -0.338688812                            | 0.058337927                               |
| 95.05653743                              | 188.4962626                                       | 0.404602792                             | 0.05184572                                |
| 86.35898275                              | 181.8761082                                       | 0.436688121                             | 0.056002637                               |
| 88.01618053                              | 210.2567081                                       | -0.154063647                            | 0.053214435                               |
| 81.30007987                              | 166.7815876                                       | 0.24797771                              | 0.056890957                               |
| 43.18210205                              | 69.09744358                                       | 0.430101485                             | 0.118068908                               |
| 108.2225977                              | 122.0763865                                       | -0.195099259                            | 0.048784493                               |
| 105.8414889                              | 211.4145145                                       | 0.476189862                             | 0.048720318                               |
| 138.7313289                              | 225.8026123                                       | -0.378883684                            | 0.043409974                               |
| 49.74398044                              | 130.5957069                                       | 0.378608606                             | 0.074174432                               |
| 42.50728439                              | 114.9690987                                       | 0.393057596                             | 0.07943855                                |
| 90.74525375                              | 186.1407185                                       | 0.412228719                             | 0.054019064                               |
| 72.3838811                               | 151.842598                                        | 0.475015045                             | 0.063905595                               |
| 104.7189074                              | 201.134697                                        | -0.438798192                            | 0.051940474                               |
| 42.5526717                               | 132.3649606                                       | 0.418678549                             | 0.074047196                               |
| 96.84530602                              | 203.2917061                                       | 0.33650391                              | 0.049838467                               |
| 45.61617122                              | 96.91094589                                       | 0.558433528                             | 0.0911773053                              |
| 70.42749745                              | 160.4303713                                       | 0.492004956                             | 0.060896844                               |
| 112.9978054                              | 259.0603867                                       | -0.170966635                            | 0.046886822                               |
| 69.05417852                              | 146.9712414                                       | 0.263662868                             | 0.063057394                               |
| 56.14867355                              | 144.405345                                        | 0.558309096                             | 0.068933918                               |
| 77.28315227                              | 168.2642002                                       | 0.451848815                             | 0.060402617                               |
| 101.058113                               | 213.5625381                                       | 0.034892936                             | 0.048329228                               |
| 106.8898226                              | 216.6701584                                       | -0.020340816                            | 0.057507396                               |
| 106.8210222                              | 205.4095325                                       | -0.494009704                            | 0.052347946                               |
| 95.15190033                              | 230.0337467                                       | -0.047734665                            | 0.049068719                               |
| 91.51835445                              | 200.5029831                                       | 0.561258469                             | 0.053978347                               |
| 62.1626437                               | 161.4495106                                       | 0.070559404                             | 0.063228022                               |
| 80.0663134                               | 133.2531261                                       | -0.459424142                            | 0.066295672                               |
| 91.03509493                              | 194.2253036                                       | 0.006699254                             | 0.052441792                               |
| 67.12935314                              | 143.8351898                                       | 0.239413288                             | 0.062753029                               |
| 125.9245359                              | 239.3237534                                       | 1.19E-05                                | 0.044636202                               |
| 92.58872558                              | 226.462059                                        | -0.215732437                            | 0.050509539                               |
| 130.3811075                              | 222.593399                                        | 0.020858892                             | 0.043388459                               |
| 78.96131787                              | 185.0671272                                       | 0.153838863                             | 0.054150916                               |
| 38.54488876                              | 132.3041377                                       | 0.65077266                              | 0.080273023                               |
| 77.84752786                              | 174.6844215                                       | 0.151193926                             | 0.055373345                               |
| 92.38588268                              | 220.1944237                                       | -0.117184287                            | 0.053290927                               |
| 93.39514407                              | 167.3108978                                       | -0.464248027                            | 0.062708844                               |
| 151.7868688                              | 172.3313828                                       | -0.486463486                            | 0.052002154                               |
| 69.52442478                              | 165.4875374                                       | 0.359332034                             | 0.061623832                               |
| 94.26198706                              | 258.0408955                                       | -0.200191084                            | 0.054264405                               |
| 82.93700222                              | 182.1174545                                       | 0.375886322                             | 0.053598548                               |
| 66.45634041                              | 147.8877716                                       | -0.272513417                            | 0.064254855                               |
| 62.02603036                              | 102.4711914                                       | 0.512227337                             | 0.086960516                               |
| 118.7940925                              | 219.7086754                                       | -0.055187218                            | 0.044417783                               |
| 111.4289742                              | 250.4804993                                       | -0.015816724                            | 0.04290961                                |
| 102.4069692                              | 180.6224136                                       | -0.498223631                            | 0.054500735                               |
| 87.8844655                               | 175.8276043                                       | 0.222233704                             | 0.053631474                               |
| 58.29180355                              | 165.1091232                                       | -0.113195397                            | 0.063423697                               |
| 103.3184498                              | 232.0415688                                       | 0.383790095                             | 0.049288879                               |
| 101.9503247                              | 197.3994732                                       | 0.349897258                             | 0.050184275                               |
| 44.97080241                              | 105.2955046                                       | 0.42119246                              | 0.084404436                               |
| 43.88874758                              | 108.6191931                                       | 0.549395373                             | 0.082147941                               |
| 98.08910602                              | 195.7438278                                       | -0.208685428                            | 0.052177791                               |
| 88.34746582                              | 173.9982681                                       | 0.492552247                             | 0.054946723                               |
| 118.0821411                              | 197.6008215                                       | -0.426773594                            | 0.052204386                               |
| 116.9761398                              | 232.2778702                                       | 0.225492843                             | 0.045524087                               |
| 109.6734908                              | 225.6519251                                       | -0.321086673                            | 0.050554003                               |
| 91.12332271                              | 191.6060944                                       | 0.425414297                             | 0.05319549                                |
| 96.22581239                              | 216.5231171                                       | 0.373217808                             | 0.050735587                               |
| 113.1160646                              | 246.896759                                        | 0.098670639                             | 0.045554003                               |
| 64.9726919                               | 141.9282217                                       | 0.541156503                             | 0.065230545                               |
| 53.02333911                              | 137.6682081                                       | 0.40888343                              | 0.069800599                               |
| 60.99757268                              | 106.6243086                                       | 0.646250519                             | 0.078724327                               |
| 122.1285974                              | 248.0294533                                       | -0.019022365                            | 0.043482869                               |
| 82.64288955                              | 205.3528137                                       | 0.105990223                             | 0.053207971                               |
| 120.2115635                              | 239.1580124                                       | 0.267794864                             | 0.045267401                               |
| 95.12854566                              | 226.1913567                                       | 0.172990135                             | 0.049088343                               |
| 72.55584048                              | 177.253603                                        | 0.27397744                              | 0.058097099                               |
| 147.9956081                              | 272.1399486                                       | -0.062376726                            | 0.038044848                               |
| 110.2299995                              | 238.3573151                                       | -0.135776864                            | 0.045371663                               |
| 91.76757346                              | 185.4438038                                       | 0.210584269                             | 0.053033483                               |
| 68.70536215                              | 152.9475021                                       | -0.589240404                            | 0.077384067                               |
| 68.02388465                              | 175.4742203                                       | 0.399056517                             | 0.058866858                               |
| 56.06692972                              | 125.0534306                                       | 0.613299044                             | 0.074485596                               |
| 120.4746541                              | 244.095686                                        | 0.294248394                             | 0.0453407                                 |
| 145.0289499                              | 264.8857822                                       | -0.483974932                            | 0.042513318                               |
| 51.64262209                              | 179.205265                                        | -0.041427903                            | 0.071934068                               |
| 74.2480099                               | 172.6562538                                       | 0.055528882                             | 0.068480726                               |
| 83.24494308                              | 165.986866                                        | 0.252230487                             | 0.058125739                               |
| 118.3842216                              | 243.1272144                                       | 0.372249412                             | 0.04540603                                |
| 53.41322377                              | 138.4260383                                       | 0.283291953                             | 0.068989089                               |
| 62.36418468                              | 154.914978                                        | 0.326761969                             | 0.063980129                               |
| 58.10327309                              | 155.1549683                                       | 0.271205678                             | 0.065751822                               |
| 211.3977061                              | 356.2540665                                       | -0.261285763                            | 0.03722914                                |
| 84.50114196                              | 171.3473587                                       | -0.143039751                            | 0.053552686                               |
| 83.31757426                              | 190.8311996                                       | -0.141084897                            | 0.055324212                               |
| 75.21610089                              | 149.0263443                                       | -0.433987264                            | 0.065726359                               |
| 102.6138671                              | 187.9655495                                       | 0.431735078                             | 0.049924069                               |

| log.sigma.4.0.mm.3D_firstorder_MeanAbsoluteDeviation | log.sigma.4.0.mm.3D_firstorder_Energy | log.sigma.4.0.mm.3D_firstorder_RobustMeanAbsoluteDeviation | log.sigma.4.0.mm.3D_firstorder_Median |
|------------------------------------------------------|---------------------------------------|------------------------------------------------------------|---------------------------------------|
| 122.8710806                                          | 17434518.28                           | 85.45775562                                                | -26.95464516                          |
| 90.58710032                                          | 29796875.67                           | 60.07908753                                                | -21.6557312                           |
| 97.91844987                                          | 7839286.338                           | 72.0608983                                                 | -67.88574982                          |
| 114.0451111                                          | 52374074.37                           | 82.73195882                                                | 21.48507881                           |
| 134.5072446                                          | 10261370.43                           | 95.14647833                                                | -8.029623032                          |
| 95.91333994                                          | 12541983.03                           | 71.46501526                                                | -66.32537079                          |
| 74.46462671                                          | 3111246.301                           | 49.39478868                                                | -1.497210503                          |
| 143.9520798                                          | 30987750.89                           | 106.2094552                                                | -10.84298801                          |
| 129.3841226                                          | 55799200.36                           | 91.53864394                                                | -36.50730515                          |
| 92.71885788                                          | 45601492.3                            | 64.24556083                                                | -44.38386726                          |
| 105.9825195                                          | 15617085.04                           | 80.33268963                                                | -30.88356972                          |
| 110.6273477                                          | 29091436.63                           | 78.63328688                                                | -39.69600105                          |
| 104.4440095                                          | 34123386.62                           | 75.72215656                                                | 1.304434657                           |
| 111.4923338                                          | 19393730.56                           | 84.61661509                                                | 9.265581131                           |
| 101.7166689                                          | 15356720.8                            | 71.25085367                                                | 24.03131866                           |
| 59.84536799                                          | 54234537.42                           | 32.04613722                                                | 0.752197027                           |
| 121.312202                                           | 17093271.85                           | 88.72021443                                                | -39.60940933                          |
| 119.8731116                                          | 50621377.5                            | 86.68123248                                                | -31.17998505                          |
| 136.4992207                                          | 16651345.14                           | 96.3984633                                                 | 34.78820992                           |
| 78.48795686                                          | 29071572.06                           | 53.68629077                                                | -14.61735058                          |
| 72.61139333                                          | 55819262.43                           | 49.12192216                                                | -50.83357811                          |
| 105.5984148                                          | 29640973.31                           | 75.28167567                                                | -4.721551895                          |
| 92.43518721                                          | 39714474.73                           | 62.93064541                                                | -42.17326355                          |
| 115.7783026                                          | 9664398.258                           | 83.99621164                                                | 34.15057373                           |
| 77.94023869                                          | 15733997.39                           | 55.36660684                                                | -72.85068512                          |
| 116.151112                                           | 16081861.58                           | 81.53513419                                                | -61.44939232                          |
| 69.37574498                                          | 31859606.97                           | 43.00045252                                                | -16.13225079                          |
| 94.71219153                                          | 25427695.89                           | 66.5752003                                                 | -74.60070038                          |
| 130.1347429                                          | 40404217.41                           | 102.1430908                                                | 6.969692707                           |
| 92.61861448                                          | 44262417.86                           | 62.74418692                                                | -53.7553997                           |
| 85.73855838                                          | 42491850.12                           | 60.12007954                                                | -57.9917984                           |
| 97.93689351                                          | 90435222.53                           | 68.28862936                                                | -4.05283165                           |
| 117.8884894                                          | 41898092.09                           | 86.51163933                                                | -3.432048798                          |
| 119.743199                                           | 2265919.559                           | 88.00196913                                                | 16.65676689                           |
| 118.0092187                                          | 7330946.941                           | 83.59711497                                                | -10.96788502                          |
| 120.4766659                                          | 41831318.68                           | 92.71635293                                                | 19.69441986                           |
| 112.3599385                                          | 55560522.36                           | 82.85233523                                                | -50.03019905                          |
| 90.63822935                                          | 41000704.84                           | 66.33941994                                                | 5.024611473                           |
| 94.73262455                                          | 13168138.81                           | 60.0887751                                                 | 20.81834412                           |
| 111.4056157                                          | 21394464.69                           | 79.34437866                                                | -23.80129433                          |
| 91.80909954                                          | 21276695.06                           | 62.42834618                                                | -27.39855576                          |
| 132.333813                                           | 25623057.23                           | 97.29544679                                                | -15.50272846                          |
| 119.428078                                           | 35009274.54                           | 92.04365208                                                | -23.30849266                          |
| 131.9931591                                          | 27407493.58                           | 94.59739495                                                | -9.308965683                          |
| 105.454456                                           | 31785275.5                            | 75.73110332                                                | -9.787410736                          |
| 76.70273901                                          | 21554604.18                           | 55.4866579                                                 | -48.19152832                          |
| 101.6060716                                          | 67337935.48                           | 72.77561096                                                | 4.740086794                           |
| 116.4524257                                          | 14229143.72                           | 88.91484336                                                | -55.02017975                          |
| 103.810102                                           | 2468552.53                            | 66.8174665                                                 | 11.16798353                           |
| 128.3325664                                          | 14576065.7                            | 80.43782766                                                | 26.49230385                           |
| 93.44393877                                          | 47235331.71                           | 66.54820217                                                | -12.47480917                          |
| 126.8190073                                          | 23124220.35                           | 104.2952677                                                | -68.51570129                          |
| 106.2461861                                          | 69299181.34                           | 74.10279633                                                | -22.46598625                          |
| 91.36933845                                          | 7831585.719                           | 63.26971478                                                | 8.366312027                           |
| 76.82494069                                          | 73290184.48                           | 47.12292081                                                | -4.245641708                          |
| 127.9545125                                          | 23323406.22                           | 92.47071264                                                | -34.50378799                          |
| 133.1521171                                          | 58980865.23                           | 100.3879196                                                | -37.01754379                          |
| 115.0790292                                          | 28026896.19                           | 77.06414759                                                | 10.90184879                           |
| 105.1042419                                          | 16133398.24                           | 74.37869427                                                | -59.80194664                          |
| 89.76618426                                          | 11072941                              | 66.55308461                                                | -19.65044785                          |
| 124.4319649                                          | 48777821.8                            | 94.38320009                                                | -47.39910889                          |
| 113.2383319                                          | 110997643.4                           | 79.67478899                                                | 0.820100158                           |
| 70.30014547                                          | 27448650.33                           | 45.5753061                                                 | 11.66179323                           |
| 73.49236785                                          | 26581157.17                           | 47.86094175                                                | -23.72291946                          |
| 114.1319865                                          | 4863907.781                           | 81.81405625                                                | -51.23562241                          |
| 105.8593029                                          | 29674716.07                           | 72.30251521                                                | 20.09238625                           |
| 123.2050553                                          | 10399186.98                           | 81.93187588                                                | -19.39112282                          |
| 126.8425005                                          | 76375733.77                           | 93.17030858                                                | -1.140934467                          |
| 124.0328021                                          | 13618253.44                           | 91.65419096                                                | -61.06179237                          |
| 108.2643623                                          | 36311885.74                           | 77.62585784                                                | -24.80406952                          |
| 117.1533364                                          | 61818848.81                           | 86.63815154                                                | -39.23192024                          |
| 129.0848131                                          | 28920744.15                           | 97.92556372                                                | -37.52138519                          |
| 88.94737346                                          | 67648398.38                           | 61.45870365                                                | -19.53922272                          |
| 82.45236218                                          | 76913035.68                           | 57.90377488                                                | -32.73200798                          |
| 79.4007431                                           | 111002339                             | 48.78785844                                                | 9.725392818                           |
| 135.2394998                                          | 32618537.76                           | 100.5894476                                                | -35.14015579                          |
| 110.27307                                            | 23786002.75                           | 82.8692813                                                 | -60.67239761                          |
| 128.2802668                                          | 17274394.28                           | 94.72345931                                                | -66.23318481                          |
| 119.7427298                                          | 46189222.67                           | 90.31621173                                                | -90.21736908                          |
| 99.6472552                                           | 46004381.77                           | 73.40129636                                                | -52.98469162                          |
| 151.9193415                                          | 25094604.25                           | 112.1390631                                                | -123.8113098                          |
| 128.024588                                           | 32116152.71                           | 97.01666234                                                | -17.06277657                          |
| 107.9346467                                          | 53577403.33                           | 74.96676057                                                | 19.02204323                           |
| 87.11455633                                          | 1944852.571                           | 56.90498026                                                | 24.46177673                           |
| 97.83836654                                          | 48262149.79                           | 71.55783482                                                | -7.042399883                          |
| 80.36862703                                          | 58795359.69                           | 53.73366293                                                | -18.4778204                           |
| 131.7271484                                          | 21006883.63                           | 99.26540713                                                | -54.15543747                          |
| 144.6501134                                          | 50834959.73                           | 107.2282898                                                | -19.02277946                          |
| 93.26921075                                          | 2264694.793                           | 70.2332859                                                 | -26.56039238                          |
| 98.8114272                                           | 1864287.929                           | 65.25234508                                                | -38.22090912                          |
| 101.8479953                                          | 70221808.49                           | 68.21724217                                                | -9.199127197                          |
| 133.4940739                                          | 22801536.93                           | 100.8217917                                                | -93.05289841                          |
| 83.67965698                                          | 12700740.29                           | 58.98061954                                                | -38.07260513                          |
| 90.76192778                                          | 54673679.05                           | 64.19350875                                                | -26.575387                            |
| 89.15059206                                          | 70274733.62                           | 64.53407057                                                | -4.368436337                          |
| 182.3937984                                          | 12791122.16                           | 142.0331498                                                | -48.77031708                          |
| 106.0100314                                          | 21697786.5                            | 73.05638454                                                | 17.03014755                           |
| 110.5073378                                          | 2204902.934                           | 79.77079752                                                | 18.65061569                           |
| 91.2252381                                           | 5052828.027                           | 63.08858877                                                | 36.32481766                           |
| 116.8122311                                          | 20120978.83                           | 79.20490547                                                | -55.67925262                          |

| log.sigma.4.0.mm.3D_firstorder_TotalEnergy | log.sigma.4.0.mm.3D_firstorder_Maximum | log.sigma.4.0.mm.3D_firstorder_RootMeanSquared | log.sigma.4.0.mm.3D_firstorder_90Percentile | log.sigma.4.0.mm.3D_firstorder_Minimum |
|--------------------------------------------|----------------------------------------|------------------------------------------------|---------------------------------------------|----------------------------------------|
| 470731993.5                                | 421.914917                             | 157.1457448                                    | 174.8441544                                 | -402.1965027                           |
| 804515643.1                                | 432.4551392                            | 119.7752583                                    | 136.5644043                                 | -333.1584473                           |
| 211660731.1                                | 265.4225769                            | 134.3981836                                    | 94.40844574                                 | -322.0983887                           |
| 1414100008                                 | 453.6386414                            | 140.9833645                                    | 199.2586395                                 | -415.4534302                           |
| 277057001.6                                | 320.3009949                            | 169.0656812                                    | 221.2085419                                 | -438.7032471                           |
| 338633541.7                                | 185.4493866                            | 139.6617945                                    | 66.23160706                                 | -354.6600952                           |
| 84003650.14                                | 268.561676                             | 96.08425922                                    | 150.9508392                                 | -217.0136566                           |
| 836669274                                  | 482.5621948                            | 175.8576103                                    | 188.2226166                                 | -430.2727966                           |
| 1506578410                                 | 436.1005249                            | 163.8274777                                    | 185.4547394                                 | -450.9510498                           |
| 1231240292                                 | 380.3654175                            | 121.3245868                                    | 133.258606                                  | -352.4838257                           |
| 421661296.1                                | 245.1486511                            | 137.4191421                                    | 97.5923111                                  | -366.2868958                           |
| 785468789.1                                | 423.6565552                            | 140.106564                                     | 157.2527679                                 | -347.7656555                           |
| 921331438.7                                | 389.3192749                            | 128.2689936                                    | 176.1266449                                 | -271.7761536                           |
| 523630725.2                                | 344.372406                             | 131.7072788                                    | 159.4093246                                 | -316.8058472                           |
| 414631461.7                                | 382.8424377                            | 128.8344839                                    | 187.7704773                                 | -263.1373291                           |
| 1464332510                                 | 454.2281494                            | 88.35666613                                    | 110.372113                                  | -312.9770813                           |
| 461518339.9                                | 318.1885071                            | 156.4893867                                    | 121.6963379                                 | -400.3052979                           |
| 1366777193                                 | 444.8674316                            | 147.3339073                                    | 192.4316452                                 | -312.203125                            |
| 449586318.8                                | 406.6672668                            | 169.1465597                                    | 214.8316467                                 | -403.894104                            |
| 784932445.7                                | 352.3712769                            | 101.8773651                                    | 110.9109955                                 | -241.2892151                           |
| 1507120085                                 | 389.7973328                            | 103.3690352                                    | 78.43055038                                 | -366.036377                            |
| 800306279.3                                | 530.1890259                            | 131.2749939                                    | 173.6274048                                 | -292.6816406                           |
| 1072290818                                 | 409.7435608                            | 120.5906292                                    | 137.024292                                  | -340.4299622                           |
| 260938753                                  | 310.0844116                            | 141.7473247                                    | 184.620575                                  | -411.0631409                           |
| 424817929.5                                | 252.4877777                            | 114.3158088                                    | 70.55751343                                 | -271.7012939                           |
| 434210262.6                                | 405.7419434                            | 152.2258559                                    | 154.9442734                                 | -357.2381287                           |
| 860209388.2                                | 385.1271667                            | 95.8751216                                     | 115.4061394                                 | -364.6441345                           |
| 686547789                                  | 368.1972961                            | 133.2080311                                    | 110.4929153                                 | -301.4293518                           |
| 1090913870                                 | 344.1499939                            | 151.30072                                      | 184.1723236                                 | -364.3545837                           |
| 1195085282                                 | 428.6292114                            | 131.956198                                     | 93.90279083                                 | -392.5617676                           |
| 1147279953                                 | 359.2389221                            | 115.6132358                                    | 101.7025436                                 | -312.2259521                           |
| 2441751008                                 | 511.055542                             | 123.4927492                                    | 186.5400269                                 | -306.4515991                           |
| 1130168486                                 | 401.658783                             | 143.4897983                                    | 175.1674072                                 | -345.1845703                           |
| 61179828.09                                | 319.6350098                            | 147.6065312                                    | 238.8757462                                 | -311.4049377                           |
| 197935567.4                                | 252.2775726                            | 148.5973266                                    | 132.3773499                                 | -458.684906                            |
| 1129445604                                 | 381.442688                             | 143.9047379                                    | 153.1392075                                 | -398.2819214                           |
| 1500134104                                 | 482.8484802                            | 138.8950973                                    | 160.7456879                                 | -306.8727722                           |
| 1107019031                                 | 342.0444946                            | 110.5640993                                    | 138.7924805                                 | -273.0508118                           |
| 355539748                                  | 377.7428894                            | 125.5795609                                    | 153.5274445                                 | -367.6136169                           |
| 577650546.7                                | 384.0109253                            | 142.8114301                                    | 127.9781525                                 | -351.7331848                           |
| 574470766.7                                | 489.6490173                            | 120.1443474                                    | 136.0944519                                 | -395.4926453                           |
| 691822545.7                                | 419.2286072                            | 163.9717467                                    | 170.9105743                                 | -420.6393738                           |
| 945250412.7                                | 308.1537781                            | 146.0175238                                    | 129.4969131                                 | -392.644989                            |
| 740002326.6                                | 411.1750488                            | 163.5206963                                    | 192.4429169                                 | -386.2348938                           |
| 858202438.6                                | 365.6648865                            | 130.0963752                                    | 153.5549637                                 | -300.147583                            |
| 581974312.8                                | 305.5325317                            | 98.35862134                                    | 108.1484375                                 | -230.9387207                           |
| 1818124258                                 | 423.7833862                            | 125.6375541                                    | 173.9027634                                 | -330.4099426                           |
| 384186880.5                                | 284.6789246                            | 156.2266448                                    | 92.49514008                                 | -360.8985291                           |
| 66650918.31                                | 278.32901                              | 135.7277931                                    | 167.3293289                                 | -392.835713                            |
| 393553773.8                                | 451.5358582                            | 171.254489                                     | 218.6493683                                 | -478.7597961                           |
| 1275353956                                 | 438.0689087                            | 117.4536741                                    | 137.8348618                                 | -311.9713135                           |
| 624353949.4                                | 158.5990601                            | 167.2171414                                    | 92.48970642                                 | -396.7535706                           |
| 1871077896                                 | 501.4606018                            | 134.6714491                                    | 159.8283539                                 | -368.0584106                           |
| 211452814.4                                | 304.1792603                            | 115.1147865                                    | 145.0190735                                 | -289.5231323                           |
| 1978834981                                 | 428.4388123                            | 105.9983776                                    | 140.8635773                                 | -279.1325989                           |
| 629731967.9                                | 415.7134705                            | 162.8926733                                    | 158.9958282                                 | -416.1615906                           |
| 1592483361                                 | 379.7042236                            | 163.9971322                                    | 164.4786255                                 | -461.4724731                           |
| 756726197.2                                | 411.7033386                            | 147.2272635                                    | 148.4876129                                 | -494.851593                            |
| 435601752.6                                | 304.12854                              | 140.7831651                                    | 126.2445801                                 | -365.0301514                           |
| 298969406.9                                | 243.7998199                            | 112.1097899                                    | 110.5744858                                 | -328.6326294                           |
| 1317001189                                 | 422.9124451                            | 151.7210093                                    | 165.9192383                                 | -332.1856079                           |
| 2996936371                                 | 584.7072754                            | 142.3461958                                    | 183.6894379                                 | -369.9382019                           |
| 741113559                                  | 435.6368713                            | 94.24997804                                    | 130.3026031                                 | -250.453476                            |
| 717691243.6                                | 311.9661255                            | 98.65658803                                    | 119.0990906                                 | -341.9234314                           |
| 131325510.1                                | 251.443634                             | 149.7141328                                    | 132.677774                                  | -406.5439148                           |
| 801217334                                  | 518.4642334                            | 128.2316711                                    | 214.4619476                                 | -318.0152893                           |
| 280778048.6                                | 351.9502869                            | 162.4619204                                    | 142.1414993                                 | -458.8943787                           |
| 2062144812                                 | 425.9709473                            | 154.5632993                                    | 200.4065216                                 | -322.1326294                           |
| 367692842.8                                | 254.4417267                            | 174.7403804                                    | 78.07265472                                 | -418.09198                             |
| 980420915                                  | 405.0160217                            | 134.3749657                                    | 174.62883                                   | -309.5660706                           |
| 1669108918                                 | 468.9385071                            | 142.6013592                                    | 180.166037                                  | -350.0531006                           |
| 780860091.9                                | 377.7713928                            | 160.0507674                                    | 154.6919434                                 | -362.4691162                           |
| 1826506756                                 | 445.6982422                            | 114.4109277                                    | 138.5405838                                 | -289.2232971                           |
| 2076651963                                 | 378.0038147                            | 107.0149943                                    | 115.5793953                                 | -380.944397                            |
| 2997063152                                 | 475.2948914                            | 109.9625302                                    | 161.0845825                                 | -294.937561                            |
| 880700519.6                                | 477.9228516                            | 170.9622193                                    | 152.366272                                  | -473.4378357                           |
| 642222074.3                                | 411.2724304                            | 145.9264932                                    | 102.6661621                                 | -383.8417053                           |
| 466408645.6                                | 337.4909058                            | 168.2815473                                    | 143.5619583                                 | -349.4265137                           |
| 1247109012                                 | 312.5698242                            | 161.8158416                                    | 121.565564                                  | -428.9335022                           |
| 1242118308                                 | 377.7166748                            | 127.1399837                                    | 130.3503494                                 | -389.005249                            |
| 677554314.8                                | 319.3652649                            | 223.1387045                                    | 103.0116684                                 | -547.0609131                           |
| 867136123.1                                | 444.8202209                            | 154.7559545                                    | 164.3016815                                 | -435.473999                            |
| 1446589890                                 | 487.1491089                            | 138.5265836                                    | 203.378038                                  | -399.202301                            |
| 52511019.41                                | 238.3752899                            | 115.8135413                                    | 157.3431793                                 | -340.0705872                           |
| 1303078044                                 | 412.139801                             | 119.2997234                                    | 170.2111969                                 | -267.1756592                           |
| 1587474712                                 | 377.2042236                            | 103.6190977                                    | 141.0958633                                 | -328.5994568                           |
| 567185858.1                                | 411.8383484                            | 164.3202233                                    | 168.9886551                                 | -357.5032959                           |
| 1372543913                                 | 345.6098633                            | 180.9820001                                    | 154.485535                                  | -567.6958618                           |
| 61146759.41                                | 204.3970795                            | 111.2446915                                    | 145.2320587                                 | -324.361145                            |
| 50335774.08                                | 257.2612                               | 133.2483513                                    | 97.82743683                                 | -337.2227783                           |
| 1895988829                                 | 482.8286743                            | 132.9129932                                    | 165.3224823                                 | -381.7200317                           |
| 615641497.2                                | 430.0982666                            | 179.7130895                                    | 137.3200455                                 | -353.3363647                           |
| 342919987.8                                | 263.4953918                            | 111.4779747                                    | 104.6522797                                 | -278.9016113                           |
| 1476189334                                 | 377.6941528                            | 115.6185439                                    | 116.2688622                                 | -322.3414612                           |
| 1897417808                                 | 362.086731                             | 110.0173268                                    | 134.7027054                                 | -272.8436584                           |
| 345360298.3                                | 348.6029663                            | 224.8506062                                    | 185.2451324                                 | -529.2995605                           |
| 585840235.6                                | 339.1672363                            | 133.5798429                                    | 188.3205948                                 | -395.6442871                           |
| 59532379.23                                | 264.8712463                            | 133.8881627                                    | 183.1973389                                 | -284.1177063                           |
| 136426356.7                                | 279.444397                             | 115.4642805                                    | 161.0698151                                 | -292.933075                            |
| 543266428.3                                | 497.0333557                            | 157.9020559                                    | 148.3581268                                 | -458.300354                            |

| log.sigma.4.0.mm.3D_firstorder_Entropy | log.sigma.4.0.mm.3D_firstorder_StandardDeviation | log.sigma.4.0.mm.3D_firstorder_Range | log.sigma.4.0.mm.3D_firstorder_Variance | log.sigma.4.0.mm.3D_firstorder_10Percentile |
|----------------------------------------|--------------------------------------------------|--------------------------------------|-----------------------------------------|---------------------------------------------|
| 4.621561944                            | 154.7866324                                      | 824.1114197                          | 23958.90158                             | -235.196701                                 |
| 4.230969172                            | 117.9447698                                      | 765.6135864                          | 13910.96872                             | -173.6189819                                |
| 4.213293702                            | 118.4707494                                      | 587.5209656                          | 14035.31847                             | -213.1843063                                |
| 4.503151457                            | 139.4890244                                      | 869.0920715                          | 19457.18794                             | -168.7191315                                |
| 4.670896138                            | 168.6282271                                      | 759.0042419                          | 28435.47897                             | -247.4117584                                |
| 4.184526916                            | 114.9135479                                      | 540.1094818                          | 13205.12349                             | -245.0312561                                |
| 3.922039085                            | 95.92070066                                      | 485.5753326                          | 9200.780815                             | -114.3967712                                |
| 4.780501873                            | 173.8111249                                      | 912.8349915                          | 30210.30714                             | -264.790274                                 |
| 4.703460405                            | 160.3895469                                      | 887.0515747                          | 25724.80676                             | -242.4775543                                |
| 4.225944071                            | 116.8136128                                      | 732.8492432                          | 13645.42013                             | -169.1388016                                |
| 4.254878451                            | 126.5319881                                      | 611.4355469                          | 16010.34402                             | -241.3895386                                |
| 4.455397311                            | 137.0287544                                      | 771.4222107                          | 18776.87952                             | -202.1390137                                |
| 4.329351534                            | 128.1773924                                      | 661.0954285                          | 16429.44393                             | -156.6780106                                |
| 4.369287573                            | 131.6725336                                      | 661.1782532                          | 17337.6561                              | -186.4337204                                |
| 4.342287811                            | 126.7432339                                      | 645.9797668                          | 16063.84735                             | -140.3435669                                |
| 3.655185241                            | 88.08283992                                      | 777.2052307                          | 7758.586688                             | -97.72400818                                |
| 4.527570893                            | 146.6843339                                      | 718.4938049                          | 21516.29382                             | -272.0632172                                |
| 4.532651462                            | 146.5630637                                      | 757.0755566                          | 21480.73165                             | -191.1750275                                |
| 4.718268384                            | 168.8352261                                      | 810.5613708                          | 28505.33358                             | -240.7905975                                |
| 3.996879751                            | 100.8002954                                      | 593.6604919                          | 10160.69956                             | -149.3182678                                |
| 3.923344915                            | 93.22320925                                      | 755.8337097                          | 8690.566742                             | -156.4610596                                |
| 4.390923102                            | 131.263364                                       | 822.8706665                          | 17230.07072                             | -165.8866852                                |
| 4.23560195                             | 117.4759869                                      | 750.1735229                          | 13800.6075                              | -161.9196625                                |
| 4.456777334                            | 140.9330484                                      | 721.1475525                          | 19862.12414                             | -184.6988525                                |
| 3.955220167                            | 96.33288614                                      | 524.1890717                          | 9280.024953                             | -179.5742767                                |
| 4.528300893                            | 144.3995387                                      | 762.980072                           | 20851.22677                             | -231.4890259                                |
| 3.870696815                            | 95.15611862                                      | 749.1713013                          | 9054.686911                             | -121.7438181                                |
| 4.22507499                             | 118.452511                                       | 669.6266479                          | 14030.99736                             | -207.4460114                                |
| 4.527435361                            | 151.2556892                                      | 708.5045776                          | 22878.28352                             | -211.0576172                                |
| 4.2573395                              | 118.559105                                       | 821.190979                           | 14056.26137                             | -209.7286774                                |
| 4.094920489                            | 107.0256237                                      | 671.4648743                          | 11454.48414                             | -167.8151245                                |
| 4.295088479                            | 122.7593579                                      | 817.5071411                          | 15069.85994                             | -135.5261658                                |
| 4.531359295                            | 143.3601946                                      | 746.8433533                          | 20552.14539                             | -198.3170532                                |
| 4.386345449                            | 144.9343485                                      | 631.0399475                          | 21005.96538                             | -163.6496857                                |
| 4.481621264                            | 145.0261462                                      | 710.9624786                          | 21032.58307                             | -234.0645706                                |
| 4.481791213                            | 141.7702306                                      | 779.7246094                          | 20098.79829                             | -217.8466599                                |
| 4.394123646                            | 135.9162319                                      | 789.7212524                          | 18473.22211                             | -189.8152756                                |
| 4.14921883                             | 110.5307033                                      | 615.0953064                          | 12217.03637                             | -155.0750565                                |
| 4.25069917                             | 125.4302409                                      | 745.3565063                          | 15732.74534                             | -179.4320343                                |
| 4.451334785                            | 138.2442093                                      | 735.7441101                          | 19111.46142                             | -236.72525                                  |
| 4.249237857                            | 117.7258168                                      | 885.1416626                          | 13859.36794                             | -171.4417831                                |
| 4.655782397                            | 160.9627162                                      | 839.867981                           | 25908.996                               | -259.1124695                                |
| 4.43962753                             | 140.2411829                                      | 700.7987671                          | 19667.58939                             | -240.8339249                                |
| 4.698025121                            | 162.5980973                                      | 797.4099426                          | 26438.14125                             | -243.9658569                                |
| 4.394577777                            | 129.4514345                                      | 745.8124695                          | 16757.6739                              | -178.2314194                                |
| 3.84569611                             | 93.78948019                                      | 536.4712524                          | 8796.466593                             | -136.2487595                                |
| 4.357384829                            | 125.4592904                                      | 754.1933289                          | 15740.03355                             | -158.4797211                                |
| 4.382232584                            | 138.4569671                                      | 645.574536                           | 19170.33173                             | -270.1211426                                |
| 4.242983153                            | 135.7237271                                      | 671.1645813                          | 18420.56229                             | -202.899617                                 |
| 4.652537503                            | 171.2160523                                      | 930.2956543                          | 29314.93657                             | -260.262085                                 |
| 4.231140969                            | 116.8335818                                      | 750.0402222                          | 13650.08584                             | -159.9848175                                |
| 4.304414121                            | 143.8745759                                      | 555.3526306                          | 20699.8936                              | -288.2090454                                |
| 4.43693518                             | 133.7882965                                      | 869.5190125                          | 17899.30828                             | -186.5785828                                |
| 4.181148299                            | 115.1147027                                      | 602.7023926                          | 13251.39478                             | -153.5373383                                |
| 3.973972953                            | 105.9462648                                      | 707.5714111                          | 11224.61102                             | -143.9445892                                |
| 4.649132035                            | 156.8942148                                      | 831.875061                           | 24615.79465                             | -263.3533833                                |
| 4.670038814                            | 158.6877736                                      | 841.1766698                          | 25181.8095                              | -254.0559021                                |
| 4.508918984                            | 146.4956092                                      | 906.5549316                          | 21460.96352                             | -226.8121643                                |
| 4.400441201                            | 130.3297382                                      | 669.1586914                          | 16985.84065                             | -220.2604752                                |
| 4.113362173                            | 108.1988974                                      | 527.4324493                          | 11707.00141                             | -179.9616089                                |
| 4.503247101                            | 147.5655257                                      | 755.098053                           | 21775.58439                             | -213.1160339                                |
| 4.527191851                            | 142.2485197                                      | 654.6454773                          | 20234.64136                             | -178.1676407                                |
| 3.889544888                            | 93.48136959                                      | 686.0903473                          | 8738.766461                             | -111.4072472                                |
| 3.908405661                            | 96.64239052                                      | 653.8895569                          | 9339.751645                             | -136.7035217                                |
| 4.451973192                            | 140.3618732                                      | 657.9875488                          | 19701.45543                             | -242.1919434                                |
| 4.421233604                            | 134.03256                                        | 836.4795227                          | 17964.72713                             | -127.2238815                                |
| 4.559023114                            | 157.5811202                                      | 810.8446655                          | 24831.80943                             | -264.718457                                 |
| 4.597235881                            | 154.5029833                                      | 748.1035767                          | 23871.17184                             | -213.0100952                                |
| 4.483051708                            | 149.6831215                                      | 672.5337067                          | 22405.03687                             | -320.0096283                                |
| 4.415964645                            | 133.7493648                                      | 714.5820923                          | 17888.8926                              | -175.9135895                                |
| 4.48002505                             | 141.4573866                                      | 818.9916077                          | 20010.19221                             | -188.0606384                                |
| 4.586954963                            | 153.7225575                                      | 740.240509                           | 23630.62468                             | -252.0190857                                |
| 4.168975433                            | 113.3188383                                      | 734.9215393                          | 12841.15911                             | -157.7968658                                |
| 4.05238276                             | 103.1757549                                      | 758.9482117                          | 10645.2364                              | -158.2360992                                |
| 4.063875789                            | 108.7673438                                      | 770.2324524                          | 11830.33509                             | -116.7214844                                |
| 4.696256211                            | 163.7635961                                      | 951.3606873                          | 26818.51541                             | -271.0802002                                |
| 4.381070789                            | 131.8512122                                      | 795.1141357                          | 17384.74215                             | -236.5665009                                |
| 4.574062214                            | 155.6160854                                      | 686.9174194                          | 24216.36603                             | -270.4795624                                |
| 4.493783581                            | 142.4197424                                      | 741.5033264                          | 20283.38302                             | -252.4194931                                |
| 4.279084509                            | 120.679207                                       | 766.7219238                          | 14563.47101                             | -186.1628189                                |
| 4.851466939                            | 183.8353596                                      | 866.426178                           | 33795.43943                             | -379.1902924                                |
| 4.589435529                            | 152.3396138                                      | 880.29422                            | 23207.35792                             | -239.2363586                                |
| 4.466245501                            | 136.520005                                       | 886.3514099                          | 18637.71176                             | -154.3680771                                |
| 4.025605777                            | 114.611631                                       | 578.4458771                          | 13135.82596                             | -139.5726196                                |
| 4.255376368                            | 119.2503368                                      | 679.3154602                          | 14220.64283                             | -141.9452667                                |
| 4.03620969                             | 103.5341289                                      | 705.8036804                          | 10719.31585                             | -122.9258499                                |
| 4.600652009                            | 157.7163637                                      | 769.3416443                          | 24874.45137                             | -249.2641769                                |
| 4.735081601                            | 173.9630267                                      | 913.3057251                          | 30263.13464                             | -307.03078                                  |
| 3.999225366                            | 110.8257831                                      | 528.7582245                          | 12282.3542                              | -140.4846436                                |
| 4.110284206                            | 125.0253947                                      | 594.4839783                          | 15631.34932                             | -217.5599152                                |
| 4.409244955                            | 132.5973287                                      | 864.5487061                          | 17582.05159                             | -177.606519                                 |
| 4.58488453                             | 159.3288776                                      | 783.4346313                          | 25385.69124                             | -286.4077301                                |
| 4.063357665                            | 104.7303121                                      | 542.3970032                          | 10968.43828                             | -175.2456253                                |
| 4.187220872                            | 112.8607628                                      | 700.035614                           | 12737.55177                             | -164.741037                                 |
| 4.125661819                            | 109.524191                                       | 634.9303894                          | 11995.54841                             | -153.4343109                                |
| 4.875513523                            | 211.8025537                                      | 877.9025269                          | 44860.32176                             | -379.7275391                                |
| 4.427795729                            | 133.1694645                                      | 734.8115234                          | 17734.10628                             | -167.1893005                                |
| 4.268706531                            | 133.7037711                                      | 548.9889526                          | 17876.69839                             | -171.9687744                                |
| 4.15670227                             | 114.073665                                       | 572.3774719                          | 13012.80105                             | -149.0078003                                |
| 4.58032316                             | 150.1503054                                      | 955.3337097                          | 22545.11421                             | -242.3190887                                |

| log.sigma.4.0.mm.3D_firstorder_Kurtosis | log.sigma.4.0.mm.3D_firstorder_Mean | log.sigma.4.0.mm.3D_glrIm_ShortRunLowGrayLevelEmphasis | log.sigma.4.0.mm.3D_glrIm_GrayLevelVariance |
|-----------------------------------------|-------------------------------------|--------------------------------------------------------|---------------------------------------------|
| 2.79465753                              | -27.127173                          | 0.008229888                                            | 38.49005505                                 |
| 3.319596072                             | -20.8601002                         | 0.008670713                                            | 23.50676291                                 |
| 2.41957459                              | -63.46300718                        | 0.023860159                                            | 22.71363499                                 |
| 2.543982093                             | 20.47244795                         | 0.004815308                                            | 31.62177345                                 |
| 2.481288118                             | -12.15424086                        | 0.010354079                                            | 45.70685642                                 |
| 2.215810368                             | -79.37438722                        | 0.014276381                                            | 21.26536319                                 |
| 2.914480477                             | 5.603932098                         | 0.027720795                                            | 15.32147869                                 |
| 2.415377363                             | -26.75055056                        | 0.008697405                                            | 48.45052948                                 |
| 2.634542963                             | -33.38615653                        | 0.005670519                                            | 41.85130777                                 |
| 3.077525365                             | -32.77552793                        | 0.007205138                                            | 22.59368599                                 |
| 2.18208699                              | -53.60668418                        | 0.014895527                                            | 25.63051657                                 |
| 2.855241094                             | -29.20564597                        | 0.013287808                                            | 30.43572344                                 |
| 2.742515988                             | 4.846730737                         | 0.016936658                                            | 26.64345741                                 |
| 2.205562643                             | -3.025096                           | 0.014885778                                            | 27.6860722                                  |
| 2.884905164                             | 28.16284522                         | 0.016352412                                            | 26.36010441                                 |
| 5.422902048                             | 6.95081016                          | 0.007192908                                            | 14.40629601                                 |
| 2.440515386                             | -54.52187019                        | 0.012398001                                            | 34.61438619                                 |
| 2.71134127                              | -15.05153104                        | 0.015561713                                            | 34.86599294                                 |
| 2.551491621                             | 10.25792796                         | 0.011816284                                            | 45.63479565                                 |
| 3.198106632                             | -14.77490984                        | 0.021219929                                            | 17.01833095                                 |
| 3.43201008                              | -44.66084067                        | 0.006828145                                            | 14.78556877                                 |
| 3.029625586                             | 1.747367541                         | 0.013597515                                            | 27.78533334                                 |
| 3.229852428                             | -27.23035732                        | 0.009588743                                            | 22.55337274                                 |
| 2.6790277                               | 15.17168181                         | 0.007944898                                            | 32.30946464                                 |
| 2.82378377                              | -61.54737354                        | 0.031035485                                            | 15.31071382                                 |
| 2.721622588                             | -48.18178531                        | 0.016712645                                            | 34.07913683                                 |
| 4.215067756                             | -11.71972823                        | 0.005482674                                            | 16.14007237                                 |
| 2.80737225                              | -60.9375269                         | 0.01696587                                             | 22.89526154                                 |
| 1.996744064                             | -3.691119765                        | 0.011125001                                            | 36.45858366                                 |
| 3.373670032                             | -57.93251943                        | 0.008782432                                            | 23.89775861                                 |
| 3.17871702                              | -43.72569223                        | 0.012357049                                            | 18.76116409                                 |
| 3.003026351                             | 13.43871899                         | 0.008126589                                            | 24.91258407                                 |
| 2.482249701                             | -6.097281415                        | 0.01678937                                             | 33.38223046                                 |
| 2.260373938                             | 27.95930413                         | 0.020398113                                            | 33.1772725                                  |
| 2.738843183                             | -32.38182232                        | 0.008537006                                            | 34.13410841                                 |
| 2.179607041                             | -24.69362897                        | 0.008231841                                            | 32.29628573                                 |
| 2.768418391                             | -28.61163984                        | 0.012805945                                            | 29.94971722                                 |
| 2.516091563                             | -2.717291677                        | 0.016060404                                            | 19.78482351                                 |
| 3.578531467                             | 6.12215454                          | 0.013009545                                            | 25.68934833                                 |
| 2.623009062                             | -35.82796603                        | 0.01214324                                             | 31.10222628                                 |
| 3.255389876                             | -23.98533478                        | 0.006561904                                            | 23.01282052                                 |
| 2.386125311                             | -31.26879778                        | 0.010054143                                            | 41.42112117                                 |
| 2.130726357                             | -40.66359391                        | 0.010299845                                            | 31.40251144                                 |
| 2.519187103                             | -17.34580287                        | 0.014286966                                            | 42.48056155                                 |
| 2.680084179                             | -12.93804172                        | 0.006418124                                            | 27.36060251                                 |
| 2.853408059                             | -29.63025141                        | 0.01730871                                             | 14.54702557                                 |
| 2.669763844                             | 6.690399837                         | 0.007620883                                            | 25.62858951                                 |
| 2.179073124                             | -72.36320061                        | 0.023168395                                            | 30.38319395                                 |
| 3.192981624                             | -1.21306005                         | 0.020147422                                            | 29.49210168                                 |
| 3.399262216                             | 3.628143072                         | 0.01052543                                             | 48.03833111                                 |
| 2.952614038                             | -12.05320419                        | 0.009926046                                            | 22.6135285                                  |
| 1.723512362                             | -85.21548431                        | 0.017303674                                            | 32.48186948                                 |
| 3.052556661                             | -15.39775699                        | 0.008192825                                            | 29.52229063                                 |
| 2.79836314                              | 0.138896196                         | 0.020183265                                            | 21.11004163                                 |
| 3.728302065                             | -3.323408311                        | 0.009772741                                            | 19.3485564                                  |
| 2.515050966                             | -43.79758393                        | 0.013977206                                            | 39.82354739                                 |
| 2.240382377                             | -41.39142288                        | 0.006062842                                            | 40.47890803                                 |
| 3.179778317                             | -14.65959088                        | 0.005163113                                            | 35.14443609                                 |
| 2.626285724                             | -53.2358799                         | 0.013270393                                            | 27.8187361                                  |
| 2.314726767                             | -29.35308468                        | 0.017963017                                            | 18.56869326                                 |
| 2.38512098                              | -35.26585123                        | 0.013018252                                            | 34.98055218                                 |
| 3.172741837                             | 5.272391211                         | 0.007300459                                            | 33.03969007                                 |
| 3.960711646                             | 12.01215633                         | 0.010026021                                            | 14.93473258                                 |
| 3.481241372                             | -19.8335755                         | 0.00685025                                             | 16.21181769                                 |
| 2.55653384                              | -52.08518153                        | 0.014338375                                            | 31.45401196                                 |
| 3.170368854                             | 33.8122428                          | 0.0090163                                              | 29.77901121                                 |
| 2.996810583                             | -39.52298268                        | 0.015189234                                            | 39.97457123                                 |
| 2.444463598                             | -4.317599373                        | 0.017751606                                            | 38.43660765                                 |
| 2.305105201                             | -90.16187477                        | 0.028599679                                            | 35.65189917                                 |
| 2.731848727                             | -12.95140158                        | 0.012277959                                            | 29.0540275                                  |
| 2.475376155                             | -18.02651998                        | 0.007990996                                            | 32.38947655                                 |
| 2.230815959                             | -44.56033503                        | 0.017026892                                            | 37.77244754                                 |
| 3.228869082                             | -15.77026505                        | 0.011743887                                            | 21.39417696                                 |
| 3.034183146                             | -28.4072633                         | 0.005266691                                            | 17.79222896                                 |
| 4.152579444                             | 16.16857972                         | 0.009442786                                            | 20.44271766                                 |
| 2.549493876                             | -49.08732042                        | 0.009252959                                            | 43.15208336                                 |
| 2.557186575                             | -62.52838764                        | 0.010291968                                            | 28.02456655                                 |
| 2.390693385                             | -64.04930228                        | 0.038719395                                            | 38.64138028                                 |
| 2.266903768                             | -76.81785971                        | 0.008986775                                            | 32.52825947                                 |
| 2.548726349                             | -40.01380336                        | 0.007102116                                            | 23.59042225                                 |
| 2.307391216                             | -126.4730881                        | 0.013607926                                            | 54.10922092                                 |
| 2.268194969                             | -27.24054928                        | 0.007447966                                            | 37.13476154                                 |
| 2.865398813                             | 23.49260769                         | 0.005097807                                            | 30.62015956                                 |
| 3.259966062                             | 16.64182645                         | 0.015401176                                            | 21.89669996                                 |
| 2.658379638                             | 3.43237154                          | 0.01530874                                             | 23.11941472                                 |
| 3.462156202                             | -4.19542087                         | 0.00616871                                             | 18.03939337                                 |
| 2.337372819                             | -46.11598866                        | 0.013932582                                            | 39.71223307                                 |
| 2.436067425                             | -49.91342227                        | 0.004696196                                            | 48.33909213                                 |
| 2.353140559                             | -9.645059977                        | 0.014813934                                            | 20.01741951                                 |
| 2.86253744                              | -46.08442049                        | 0.021607956                                            | 25.05872918                                 |
| 3.244357722                             | -9.154899205                        | 0.006853505                                            | 29.75518057                                 |
| 2.433358083                             | -83.13304567                        | 0.024561256                                            | 40.623329                                   |
| 2.683912174                             | -38.19555675                        | 0.015660693                                            | 18.29031357                                 |
| 3.109928628                             | -25.10171148                        | 0.01227235                                             | 21.00651772                                 |
| 2.773431224                             | -10.40498861                        | 0.016349735                                            | 19.75191232                                 |
| 2.005088782                             | -75.48160927                        | 0.017122378                                            | 72.18629379                                 |
| 2.78929107                              | 10.46270285                         | 0.007956844                                            | 29.2112956                                  |
| 2.342856652                             | 7.02436639                          | 0.032489027                                            | 28.49442624                                 |
| 2.861200095                             | 17.86614169                         | 0.020308146                                            | 21.10984112                                 |
| 3.436349475                             | -48.8666047                         | 0.006529649                                            | 37.3738951                                  |



| log.sigma.4.0.mm.3D_glrIm_LowGrayLevelRunEmphasis | log.sigma.4.0.mm.3D_glrIm_GrayLevelNonUniformityNormalized | log.sigma.4.0.mm.3D_glrIm_RunVariance | log.sigma.4.0.mm.3D_glrIm_GrayLevelNonUniformity |
|---------------------------------------------------|------------------------------------------------------------|---------------------------------------|--------------------------------------------------|
| 0.008611653                                       | 0.04663413                                                 | 0.074054528                           | 30.8771587                                       |
| 0.009414202                                       | 0.061433633                                                | 0.205222679                           | 112.3849981                                      |
| 0.025498363                                       | 0.06012754                                                 | 0.082892912                           | 24.30898511                                      |
| 0.00505211                                        | 0.049213494                                                | 0.09574202                            | 120.121483                                       |
| 0.010702479                                       | 0.044501736                                                | 0.074207428                           | 15.07647984                                      |
| 0.015084227                                       | 0.060218313                                                | 0.08693781                            | 35.99962387                                      |
| 0.0299633                                         | 0.076877503                                                | 0.1175601                             | 23.42592849                                      |
| 0.009032186                                       | 0.040554748                                                | 0.061357407                           | 38.48695989                                      |
| 0.005941152                                       | 0.043155472                                                | 0.087313345                           | 87.76061389                                      |
| 0.007776737                                       | 0.061551556                                                | 0.128952581                           | 172.5823096                                      |
| 0.015559983                                       | 0.058015668                                                | 0.085714323                           | 44.79850093                                      |
| 0.014248604                                       | 0.051484874                                                | 0.099784131                           | 70.26970324                                      |
| 0.018083199                                       | 0.055560374                                                | 0.124007098                           | 104.7636118                                      |
| 0.016018028                                       | 0.053159947                                                | 0.085739587                           | 55.32210801                                      |
| 0.017055958                                       | 0.056104802                                                | 0.095433112                           | 47.36532584                                      |
| 0.008178219                                       | 0.099845086                                                | 0.553877338                           | 549.6347817                                      |
| 0.012888679                                       | 0.048587384                                                | 0.066953884                           | 32.03039648                                      |
| 0.016752414                                       | 0.048090406                                                | 0.115269428                           | 103.0824113                                      |
| 0.012279403                                       | 0.043186925                                                | 0.070138436                           | 23.71930966                                      |
| 0.02348963                                        | 0.071021989                                                | 0.248722288                           | 173.223272                                       |
| 0.007516967                                       | 0.076416053                                                | 0.223073038                           | 346.5308863                                      |
| 0.014457143                                       | 0.053891114                                                | 0.101980707                           | 86.02768307                                      |
| 0.010294369                                       | 0.06275106                                                 | 0.111979373                           | 157.0963828                                      |
| 0.008216869                                       | 0.051344939                                                | 0.075356045                           | 23.10511121                                      |
| 0.033563044                                       | 0.072934294                                                | 0.121465508                           | 79.8341741                                       |
| 0.017571697                                       | 0.049146938                                                | 0.077591988                           | 31.93986221                                      |
| 0.006103829                                       | 0.079920707                                                | 0.380608019                           | 229.8421395                                      |
| 0.018409974                                       | 0.060057617                                                | 0.120442957                           | 78.51495477                                      |
| 0.011613832                                       | 0.04668708                                                 | 0.076742539                           | 77.55293846                                      |
| 0.009479899                                       | 0.059975525                                                | 0.223740275                           | 132.8449778                                      |
| 0.013415753                                       | 0.067610286                                                | 0.132909483                           | 194.6848286                                      |
| 0.008826685                                       | 0.058433753                                                | 0.171740188                           | 310.1896622                                      |
| 0.017482618                                       | 0.048024237                                                | 0.094587285                           | 90.60449089                                      |
| 0.020694088                                       | 0.056956483                                                | 0.039821612                           | 5.687645899                                      |
| 0.008740491                                       | 0.051795659                                                | 0.061282341                           | 16.29385256                                      |
| 0.008623278                                       | 0.048863272                                                | 0.091916505                           | 91.77816423                                      |
| 0.013720773                                       | 0.053245127                                                | 0.116138425                           | 140.7758572                                      |
| 0.017467373                                       | 0.062564212                                                | 0.153166293                           | 187.983864                                       |
| 0.013818745                                       | 0.064861871                                                | 0.121241162                           | 49.47979853                                      |
| 0.012763886                                       | 0.051784685                                                | 0.091950055                           | 50.66542292                                      |
| 0.007022676                                       | 0.061038576                                                | 0.145587187                           | 80.60981441                                      |
| 0.010530595                                       | 0.044390859                                                | 0.071823831                           | 39.83950258                                      |
| 0.010767732                                       | 0.050376572                                                | 0.080679696                           | 77.61761481                                      |
| 0.014958321                                       | 0.043190185                                                | 0.076885727                           | 41.56742334                                      |
| 0.006741092                                       | 0.053576146                                                | 0.098754879                           | 93.10420075                                      |
| 0.019338683                                       | 0.077860662                                                | 0.178118055                           | 153.0165659                                      |
| 0.008063901                                       | 0.05479297                                                 | 0.109365189                           | 214.8400138                                      |
| 0.024579509                                       | 0.053250911                                                | 0.083148404                           | 28.97519187                                      |
| 0.020939662                                       | 0.062153679                                                | 0.058932064                           | 7.85428699                                       |
| 0.01088127                                        | 0.050330635                                                | 0.071601683                           | 23.56759929                                      |
| 0.010674071                                       | 0.059900184                                                | 0.164658505                           | 184.0266894                                      |
| 0.018443606                                       | 0.05396447                                                 | 0.086859069                           | 41.69778647                                      |
| 0.00870158                                        | 0.052427463                                                | 0.132194053                           | 182.5199818                                      |
| 0.023545292                                       | 0.063450856                                                | 0.111560589                           | 34.26686703                                      |
| 0.010866316                                       | 0.078490855                                                | 0.293335614                           | 437.1079572                                      |
| 0.014401293                                       | 0.044232469                                                | 0.06277579                            | 36.87634087                                      |
| 0.006310567                                       | 0.042879621                                                | 0.068369239                           | 88.72389873                                      |
| 0.005351159                                       | 0.05318401                                                 | 0.089196084                           | 64.0152643                                       |
| 0.014054526                                       | 0.053122062                                                | 0.095380967                           | 39.94550991                                      |
| 0.01931423                                        | 0.063796965                                                | 0.120213606                           | 51.6279829                                       |
| 0.013929071                                       | 0.048697704                                                | 0.097215087                           | 95.75751102                                      |
| 0.007740693                                       | 0.049545019                                                | 0.126571442                           | 247.9041581                                      |
| 0.010943202                                       | 0.080222985                                                | 0.228832428                           | 216.7182585                                      |
| 0.007557731                                       | 0.077031868                                                | 0.29184361                            | 178.4360619                                      |
| 0.014710074                                       | 0.051819584                                                | 0.052566099                           | 10.70271433                                      |
| 0.009490897                                       | 0.053907464                                                | 0.115647367                           | 76.95891464                                      |
| 0.016475036                                       | 0.05174295                                                 | 0.064572999                           | 19.27587455                                      |
| 0.01899418                                        | 0.045156476                                                | 0.109814886                           | 133.3699951                                      |
| 0.030746337                                       | 0.050490261                                                | 0.060412235                           | 21.34623567                                      |
| 0.012989056                                       | 0.052675539                                                | 0.091082463                           | 98.4948758                                       |
| 0.008604679                                       | 0.050099789                                                | 0.112459868                           | 139.8359817                                      |
| 0.018050051                                       | 0.045500985                                                | 0.078124974                           | 48.16124524                                      |
| 0.012791759                                       | 0.063369966                                                | 0.178417091                           | 291.7964305                                      |
| 0.005789182                                       | 0.068053459                                                | 0.218914388                           | 399.4311887                                      |
| 0.010187744                                       | 0.072861592                                                | 0.243853185                           | 579.2983895                                      |
| 0.009596118                                       | 0.043418859                                                | 0.06623692                            | 45.80297383                                      |
| 0.010845708                                       | 0.052970114                                                | 0.088483813                           | 55.08527752                                      |
| 0.041388717                                       | 0.045259932                                                | 0.067066683                           | 26.14234841                                      |
| 0.009500445                                       | 0.048649971                                                | 0.093417652                           | 79.62994927                                      |
| 0.007579326                                       | 0.05753304                                                 | 0.101478078                           | 150.6596248                                      |
| 0.013966228                                       | 0.038047182                                                | 0.049495131                           | 18.37219152                                      |
| 0.00770416                                        | 0.045413108                                                | 0.060381591                           | 57.66146068                                      |
| 0.005370748                                       | 0.052011184                                                | 0.108982576                           | 133.4515061                                      |
| 0.015635805                                       | 0.075421927                                                | 0.071682401                           | 10.31952996                                      |
| 0.016444811                                       | 0.058353162                                                | 0.11712362                            | 181.2063411                                      |
| 0.006736579                                       | 0.071649506                                                | 0.199867349                           | 344.4896162                                      |
| 0.014774663                                       | 0.045121665                                                | 0.071495926                           | 33.12624858                                      |
| 0.004860876                                       | 0.042422781                                                | 0.058886197                           | 62.59580079                                      |
| 0.015272749                                       | 0.070235254                                                | 0.091267945                           | 11.90753741                                      |
| 0.022440534                                       | 0.067859835                                                | 0.05565645                            | 6.749424373                                      |
| 0.007326984                                       | 0.054373952                                                | 0.189170139                           | 192.8753265                                      |
| 0.026259456                                       | 0.045158485                                                | 0.06841039                            | 30.06519718                                      |
| 0.016909654                                       | 0.06633662                                                 | 0.16790958                            | 59.90806019                                      |
| 0.01316979                                        | 0.062566575                                                | 0.174376416                           | 228.9452827                                      |
| 0.017719507                                       | 0.064030835                                                | 0.190144225                           | 329.9279537                                      |
| 0.017718793                                       | 0.037039927                                                | 0.046726128                           | 8.981865269                                      |
| 0.008335764                                       | 0.05274515                                                 | 0.100816374                           | 59.20981007                                      |
| 0.034277366                                       | 0.055324353                                                | 0.054197772                           | 6.489789156                                      |
| 0.021864462                                       | 0.064942097                                                | 0.09830458                            | 22.75235701                                      |
| 0.006834391                                       | 0.048857922                                                | 0.099964049                           | 36.37548425                                      |

| log.sigma.4.0.mm.3D_glrIm_LongRunEmphasis | log.sigma.4.0.mm.3D_glrIm_ShortRunHighGrayLevelEmphasis | log.sigma.4.0.mm.3D_glrIm_RunLengthNonUniformity | log.sigma.4.0.mm.3D_glrIm_ShortRunEmphasis |
|-------------------------------------------|---------------------------------------------------------|--------------------------------------------------|--------------------------------------------|
| 1.212865333                               | 298.6317307                                             | 586.802644                                       | 0.953405023                                |
| 1.500273251                               | 197.0154262                                             | 1475.373742                                      | 0.916216247                                |
| 1.239236716                               | 139.7646637                                             | 353.753988                                       | 0.947980916                                |
| 1.264002392                               | 347.8650459                                             | 2120.752034                                      | 0.945524356                                |
| 1.201305426                               | 355.4491628                                             | 304.5066218                                      | 0.958442409                                |
| 1.245179642                               | 166.2190121                                             | 521.7281593                                      | 0.947660386                                |
| 1.35103122                                | 104.0862116                                             | 252.1680057                                      | 0.924751593                                |
| 1.176943003                               | 342.0703821                                             | 855.7429947                                      | 0.960453596                                |
| 1.236251138                               | 358.2506334                                             | 1712.01778                                       | 0.951691782                                |
| 1.352402928                               | 214.5855101                                             | 2338.096778                                      | 0.929803739                                |
| 1.237268545                               | 193.6191798                                             | 681.4921458                                      | 0.951057106                                |
| 1.282307112                               | 200.0967772                                             | 1170.848822                                      | 0.940581019                                |
| 1.33822743                                | 154.3597862                                             | 1587.993271                                      | 0.933189717                                |
| 1.241265726                               | 197.7849514                                             | 910.4927492                                      | 0.948612954                                |
| 1.263487662                               | 177.692851                                              | 733.4380527                                      | 0.945337854                                |
| 2.179711409                               | 179.0249427                                             | 3830.858459                                      | 0.857265226                                |
| 1.191829045                               | 257.9951039                                             | 592.6047157                                      | 0.958381815                                |
| 1.301691596                               | 196.4252243                                             | 1846.181703                                      | 0.942046369                                |
| 1.195310518                               | 351.5227882                                             | 493.2160789                                      | 0.958342681                                |
| 1.575221204                               | 108.4210496                                             | 1944.794673                                      | 0.911347737                                |
| 1.556500291                               | 188.5235332                                             | 3555.010728                                      | 0.905277941                                |
| 1.269814222                               | 178.3031206                                             | 1396.664413                                      | 0.947347673                                |
| 1.305046158                               | 195.128955                                              | 2135.556465                                      | 0.938434422                                |
| 1.220796909                               | 340.5092199                                             | 396.3657616                                      | 0.950952785                                |
| 1.335159539                               | 93.74696815                                             | 920.2420269                                      | 0.932619255                                |
| 1.220819727                               | 213.1444949                                             | 574.4803933                                      | 0.952294031                                |
| 1.844910785                               | 219.071334                                              | 2139.065942                                      | 0.884585768                                |
| 1.328326043                               | 142.5044292                                             | 1106.580832                                      | 0.934915894                                |
| 1.209774053                               | 258.2861296                                             | 1488.581338                                      | 0.95687952                                 |
| 1.547171241                               | 206.0829227                                             | 1756.7685                                        | 0.909696225                                |
| 1.356190471                               | 151.8291562                                             | 2409.995677                                      | 0.930831299                                |
| 1.425112172                               | 210.7302226                                             | 4388.306431                                      | 0.925724353                                |
| 1.257351315                               | 224.521265                                              | 1645.439887                                      | 0.947385188                                |
| 1.125876172                               | 238.3711582                                             | 91.9581838                                       | 0.968530957                                |
| 1.17685337                                | 352.4355124                                             | 283.998664                                       | 0.960616898                                |
| 1.250941175                               | 259.6725341                                             | 1644.297832                                      | 0.948561884                                |
| 1.306464421                               | 176.8374712                                             | 2269.583266                                      | 0.940696991                                |
| 1.403512059                               | 139.6551948                                             | 2472.922619                                      | 0.924282254                                |
| 1.332601552                               | 256.323858                                              | 648.9229939                                      | 0.935126861                                |
| 1.243997414                               | 220.3026015                                             | 862.5912191                                      | 0.951302665                                |
| 1.396628159                               | 248.3504555                                             | 1082.950597                                      | 0.922890636                                |
| 1.200392767                               | 295.0632183                                             | 801.9788429                                      | 0.956967791                                |
| 1.219156997                               | 241.3660834                                             | 1373.007846                                      | 0.955223954                                |
| 1.212733589                               | 282.5413828                                             | 856.7091047                                      | 0.955228567                                |
| 1.27029002                                | 269.5309768                                             | 1507.912602                                      | 0.944895386                                |
| 1.472675841                               | 98.36724816                                             | 1576.688142                                      | 0.913076296                                |
| 1.295156206                               | 230.6464481                                             | 3361.777047                                      | 0.940696497                                |
| 1.23398555                                | 182.8886308                                             | 479.1323528                                      | 0.950460131                                |
| 1.185679942                               | 288.5205672                                             | 112.5465876                                      | 0.954947536                                |
| 1.199393395                               | 453.1630292                                             | 418.710761                                       | 0.957110023                                |
| 1.410821654                               | 181.6032721                                             | 2550.283251                                      | 0.927544753                                |
| 1.236143497                               | 195.0457345                                             | 684.4638662                                      | 0.952419059                                |
| 1.341123965                               | 239.3587882                                             | 2953.78577                                       | 0.936101919                                |
| 1.311804141                               | 168.8451027                                             | 457.8939382                                      | 0.936035396                                |
| 1.682259498                               | 159.2119639                                             | 4300.16001                                       | 0.89834729                                 |
| 1.175966239                               | 278.348838                                              | 755.3547795                                      | 0.96192862                                 |
| 1.19446754                                | 346.2651386                                             | 1855.943474                                      | 0.957647645                                |
| 1.247866438                               | 407.616045                                              | 1054.229738                                      | 0.948342764                                |
| 1.269134654                               | 199.4880625                                             | 648.0394695                                      | 0.9428117                                  |
| 1.312473476                               | 140.6046384                                             | 698.1943189                                      | 0.941591113                                |
| 1.259797167                               | 202.2864146                                             | 1718.46824                                       | 0.948087238                                |
| 1.32898241                                | 264.0686601                                             | 4261.593289                                      | 0.937607754                                |
| 1.559396715                               | 146.9736134                                             | 2154.958655                                      | 0.909685985                                |
| 1.693593674                               | 185.7258784                                             | 1771.09137                                       | 0.894340856                                |
| 1.157398911                               | 261.3530455                                             | 187.5645431                                      | 0.963166706                                |
| 1.304505433                               | 239.6131576                                             | 1226.158283                                      | 0.940888152                                |
| 1.186266776                               | 351.6235938                                             | 335.1246023                                      | 0.958909684                                |
| 1.283820773                               | 209.0138791                                             | 2571.052141                                      | 0.946154875                                |
| 1.175216739                               | 221.3838592                                             | 382.1593724                                      | 0.960970734                                |
| 1.249708563                               | 191.4740909                                             | 1635.908035                                      | 0.948394472                                |
| 1.302479295                               | 242.3691293                                             | 2394.997583                                      | 0.940271989                                |
| 1.217768926                               | 219.6740326                                             | 939.7850517                                      | 0.953921216                                |
| 1.44580497                                | 154.0772662                                             | 3775.91618                                       | 0.922311537                                |
| 1.534533294                               | 237.1160987                                             | 4679.285336                                      | 0.911520351                                |
| 1.585982085                               | 176.7957262                                             | 6237.493024                                      | 0.905469851                                |
| 1.187245198                               | 338.6919011                                             | 949.8925615                                      | 0.959471049                                |
| 1.245502113                               | 215.4424517                                             | 912.4593934                                      | 0.949076582                                |
| 1.183957358                               | 179.0754744                                             | 522.2642098                                      | 0.961187179                                |
| 1.258958229                               | 260.9098033                                             | 1427.134457                                      | 0.946387453                                |
| 1.284854685                               | 235.5962556                                             | 2243.984827                                      | 0.940413116                                |
| 1.140383328                               | 352.8802339                                             | 445.9463184                                      | 0.969089122                                |
| 1.176811318                               | 327.5857707                                             | 1143.346365                                      | 0.959829127                                |
| 1.296689626                               | 315.9987719                                             | 2200.078925                                      | 0.94032096                                 |
| 1.200973423                               | 239.7473874                                             | 122.9987367                                      | 0.957744751                                |
| 1.312703973                               | 152.5120167                                             | 2654.135634                                      | 0.938893091                                |
| 1.502412084                               | 208.6686521                                             | 3842.743608                                      | 0.912759179                                |
| 1.196571926                               | 222.729454                                              | 660.3552105                                      | 0.958936964                                |
| 1.166438778                               | 492.796312                                              | 1341.422057                                      | 0.963449495                                |
| 1.264093597                               | 184.3602444                                             | 146.941711                                       | 0.943380169                                |
| 1.17244257                                | 183.2013957                                             | 89.3838856                                       | 0.958671725                                |
| 1.452651477                               | 272.2491951                                             | 2929.511954                                      | 0.925252539                                |
| 1.19433008                                | 186.3897337                                             | 596.6051665                                      | 0.95774513                                 |
| 1.453623244                               | 127.935911                                              | 722.4657759                                      | 0.913337867                                |
| 1.430441386                               | 165.9297865                                             | 3023.890533                                      | 0.925349715                                |
| 1.464146468                               | 133.9230253                                             | 4202.507211                                      | 0.920815388                                |
| 1.136912286                               | 437.7283016                                             | 223.4077616                                      | 0.968495008                                |
| 1.276813609                               | 296.7006126                                             | 969.2933738                                      | 0.943273601                                |
| 1.155105421                               | 186.7835589                                             | 107.2188011                                      | 0.965377967                                |
| 1.272843041                               | 183.1340509                                             | 302.8449622                                      | 0.943482812                                |
| 1.278088246                               | 331.9504644                                             | 641.4176625                                      | 0.942357982                                |

| log.sigma.4.0.mm.3D_glrIm_LongRunHighGrayLevelEmphasis | log.sigma.4.0.mm.3D_glrIm_RunPercentage | log.sigma.4.0.mm.3D_glrIm_LongRunLowGrayLevelEmphasis | log.sigma.4.0.mm.3D_glrIm_RunEntropy |
|--------------------------------------------------------|-----------------------------------------|-------------------------------------------------------|--------------------------------------|
| 365.2926317                                            | 0.937894966                             | 0.010347889                                           | 4.934177213                          |
| 305.2813446                                            | 0.880411837                             | 0.013459738                                           | 4.818379988                          |
| 172.2462097                                            | 0.931407302                             | 0.032477875                                           | 4.543627972                          |
| 461.6785708                                            | 0.926317326                             | 0.006187748                                           | 4.896284464                          |
| 446.0721333                                            | 0.943432612                             | 0.012223196                                           | 4.914516054                          |
| 212.6834758                                            | 0.929776289                             | 0.018848647                                           | 4.530221675                          |
| 143.9922785                                            | 0.903903218                             | 0.039600403                                           | 4.359490424                          |
| 409.7635262                                            | 0.947105788                             | 0.010499332                                           | 5.062539357                          |
| 452.2791598                                            | 0.933547934                             | 0.007221769                                           | 5.057635747                          |
| 291.3665237                                            | 0.905025575                             | 0.010612419                                           | 4.71934528                           |
| 252.3028933                                            | 0.933680588                             | 0.018690572                                           | 4.591407794                          |
| 260.1112855                                            | 0.920896917                             | 0.018510777                                           | 4.859687344                          |
| 215.1844568                                            | 0.90913137                              | 0.023709441                                           | 4.789796271                          |
| 255.7320614                                            | 0.930851796                             | 0.021029054                                           | 4.723294883                          |
| 230.0348403                                            | 0.926623322                             | 0.020433957                                           | 4.71696615                           |
| 425.3696333                                            | 0.790324545                             | 0.015627772                                           | 4.66330051                           |
| 321.7860204                                            | 0.944346484                             | 0.01515787                                            | 4.806443968                          |
| 250.3069557                                            | 0.919118617                             | 0.022597972                                           | 4.945676309                          |
| 436.5203611                                            | 0.94369548                              | 0.014240601                                           | 4.987594221                          |
| 172.7992594                                            | 0.870458353                             | 0.036809025                                           | 4.614027411                          |
| 305.3541698                                            | 0.86790258                              | 0.011376968                                           | 4.577266475                          |
| 231.1593096                                            | 0.927906977                             | 0.018599205                                           | 4.761655794                          |
| 254.8478176                                            | 0.916570431                             | 0.013682186                                           | 4.675033322                          |
| 442.2955858                                            | 0.935391012                             | 0.009389786                                           | 4.768974111                          |
| 124.2333202                                            | 0.909085101                             | 0.045695275                                           | 4.414551999                          |
| 258.4004097                                            | 0.936266903                             | 0.021245335                                           | 4.848550374                          |
| 430.9452572                                            | 0.828953793                             | 0.010395627                                           | 4.692646313                          |
| 182.7652108                                            | 0.912072575                             | 0.02563996                                            | 4.662852936                          |
| 332.8928359                                            | 0.94112007                              | 0.013774427                                           | 4.840446814                          |
| 344.6419986                                            | 0.871058524                             | 0.013259851                                           | 4.885225514                          |
| 203.0155702                                            | 0.905703293                             | 0.018679851                                           | 4.578854784                          |
| 304.9881239                                            | 0.894992865                             | 0.012648966                                           | 4.828070609                          |
| 295.9256934                                            | 0.927957925                             | 0.021424079                                           | 4.913109005                          |
| 277.9318334                                            | 0.960059172                             | 0.021877988                                           | 4.489041192                          |
| 429.2782162                                            | 0.947405005                             | 0.009602176                                           | 4.728936929                          |
| 340.2211686                                            | 0.929779132                             | 0.010471541                                           | 4.851847937                          |
| 229.3305171                                            | 0.917895299                             | 0.018320621                                           | 4.82429147                           |
| 206.6147208                                            | 0.895784597                             | 0.024778056                                           | 4.668562068                          |
| 364.7032318                                            | 0.913035468                             | 0.017706433                                           | 4.67886471                           |
| 280.6435763                                            | 0.932609812                             | 0.01575894                                            | 4.79656032                           |
| 361.2403928                                            | 0.895731135                             | 0.009330725                                           | 4.77182414                           |
| 362.2455743                                            | 0.941722496                             | 0.012675754                                           | 4.956597773                          |
| 308.1601683                                            | 0.938302258                             | 0.012956396                                           | 4.76599505                           |
| 349.1170646                                            | 0.93891182                              | 0.018339505                                           | 5.00716243                           |
| 354.789223                                             | 0.925247809                             | 0.00830677                                            | 4.789408376                          |
| 138.6109835                                            | 0.881853335                             | 0.030486259                                           | 4.423017235                          |
| 311.9267238                                            | 0.919073894                             | 0.010213787                                           | 4.790464988                          |
| 231.0995991                                            | 0.933368518                             | 0.031019307                                           | 4.696074954                          |
| 352.5318905                                            | 0.943168772                             | 0.024117838                                           | 4.460681254                          |
| 570.3470889                                            | 0.942114224                             | 0.012359391                                           | 4.947909791                          |
| 263.2833802                                            | 0.897196262                             | 0.014624547                                           | 4.75009302                           |
| 250.7307072                                            | 0.93433169                              | 0.023950516                                           | 4.627872098                          |
| 327.6289473                                            | 0.910957663                             | 0.011293686                                           | 4.900776404                          |
| 229.3520312                                            | 0.913835741                             | 0.037593769                                           | 4.589191205                          |
| 278.513322                                             | 0.852156275                             | 0.017574328                                           | 4.706066035                          |
| 335.0033284                                            | 0.948455413                             | 0.016317487                                           | 4.918746596                          |
| 425.3045765                                            | 0.943561682                             | 0.007422226                                           | 4.978471604                          |
| 540.870323                                             | 0.930572907                             | 0.006217044                                           | 4.877352338                          |
| 255.8393559                                            | 0.923738424                             | 0.017477968                                           | 4.778765919                          |
| 189.3816047                                            | 0.918798568                             | 0.026587329                                           | 4.493456254                          |
| 250.0839474                                            | 0.927941337                             | 0.018312859                                           | 4.880819171                          |
| 366.5768346                                            | 0.913317606                             | 0.009951269                                           | 4.982186249                          |
| 239.5759261                                            | 0.87279064                              | 0.016274619                                           | 4.519433247                          |
| 336.9645877                                            | 0.847618511                             | 0.011979739                                           | 4.633884682                          |
| 307.5793657                                            | 0.951790145                             | 0.016257638                                           | 4.66020589                           |
| 318.9783382                                            | 0.918965773                             | 0.011802833                                           | 4.841973546                          |
| 422.34711                                              | 0.945333854                             | 0.02167559                                            | 4.809806596                          |
| 269.4725749                                            | 0.923798754                             | 0.025054392                                           | 4.993790703                          |
| 266.4526891                                            | 0.947913073                             | 0.039625252                                           | 4.730167865                          |
| 240.7264746                                            | 0.929770876                             | 0.016295159                                           | 4.789242719                          |
| 315.320613                                             | 0.918142713                             | 0.011632931                                           | 4.901946193                          |
| 269.0472039                                            | 0.937589426                             | 0.022611933                                           | 4.90449047                           |
| 225.2881077                                            | 0.890643606                             | 0.018537505                                           | 4.721368231                          |
| 378.937689                                             | 0.873791634                             | 0.008837223                                           | 4.666916632                          |
| 297.8784498                                            | 0.865384615                             | 0.014540137                                           | 4.749104304                          |
| 413.3077325                                            | 0.945271574                             | 0.011130623                                           | 4.98473547                           |
| 273.9127363                                            | 0.930996488                             | 0.013433485                                           | 4.733994542                          |
| 208.5320406                                            | 0.946910467                             | 0.055670737                                           | 4.832214245                          |
| 332.7347648                                            | 0.927917321                             | 0.011879337                                           | 4.866985088                          |
| 308.4916116                                            | 0.920130818                             | 0.009831295                                           | 4.699482433                          |
| 403.3803596                                            | 0.958180708                             | 0.015490638                                           | 5.050314684                          |
| 398.5213588                                            | 0.94688235                              | 0.008829337                                           | 4.878655319                          |
| 429.1242565                                            | 0.918861583                             | 0.006706342                                           | 4.897947267                          |
| 302.1880558                                            | 0.943236074                             | 0.016704425                                           | 4.265520685                          |
| 201.3478619                                            | 0.915795205                             | 0.02202233                                            | 4.693231241                          |
| 324.5460284                                            | 0.87790077                              | 0.009957172                                           | 4.654974116                          |
| 263.9305459                                            | 0.943642476                             | 0.018729256                                           | 4.879166484                          |
| 595.7417697                                            | 0.950683981                             | 0.005586625                                           | 5.00418369                           |
| 240.9724703                                            | 0.926019336                             | 0.017397939                                           | 4.33404764                           |
| 212.8677252                                            | 0.947252747                             | 0.025801189                                           | 4.31973354                           |
| 410.8070784                                            | 0.891785196                             | 0.009963138                                           | 4.961418318                          |
| 218.405415                                             | 0.943015908                             | 0.034105302                                           | 4.873995227                          |
| 197.6085444                                            | 0.883486377                             | 0.023131112                                           | 4.6237243                            |
| 249.8817067                                            | 0.894451759                             | 0.017767088                                           | 4.719506664                          |
| 204.2938601                                            | 0.887318159                             | 0.024975821                                           | 4.689548072                          |
| 515.1953407                                            | 0.958346002                             | 0.020134293                                           | 5.049655615                          |
| 401.7834751                                            | 0.923076923                             | 0.010107268                                           | 4.82332021                           |
| 218.0272012                                            | 0.953721076                             | 0.041534131                                           | 4.437269054                          |
| 251.6215047                                            | 0.924294703                             | 0.028336118                                           | 4.509632825                          |
| 429.2049336                                            | 0.922409684                             | 0.008249588                                           | 4.97335608                           |

| log.sigma.4.0.mm.3D_glrIm_HighGrayLevelRunEmphasis | log.sigma.4.0.mm.3D_glrIm_RunLengthNonUniformityNormalized | log.sigma.4.0.mm.3D_glszm_GrayLevelVariance |
|----------------------------------------------------|------------------------------------------------------------|---------------------------------------------|
| 310.7656337                                        | 0.885337868                                                | 43.27203108                                 |
| 212.3942612                                        | 0.805387382                                                | 31.49724171                                 |
| 145.3370946                                        | 0.873556524                                                | 25.06406157                                 |
| 367.4687225                                        | 0.867738864                                                | 35.2766684                                  |
| 370.7200429                                        | 0.897653451                                                | 47.90347633                                 |
| 174.4141162                                        | 0.872052561                                                | 20.81224446                                 |
| 110.9947404                                        | 0.824097384                                                | 19.56358025                                 |
| 354.3735999                                        | 0.901362719                                                | 53.20064872                                 |
| 374.2571854                                        | 0.881512865                                                | 47.51467477                                 |
| 227.581201                                         | 0.832967535                                                | 28.8225476                                  |
| 203.5482477                                        | 0.880860205                                                | 26.93805228                                 |
| 210.5689859                                        | 0.856605581                                                | 36.17139468                                 |
| 164.4656983                                        | 0.840765446                                                | 32.3287311                                  |
| 207.8658759                                        | 0.874280017                                                | 26.87515598                                 |
| 186.8562875                                        | 0.867471817                                                | 33.77268502                                 |
| 206.0670441                                        | 0.693691201                                                | 27.92086712                                 |
| 269.2106177                                        | 0.897577428                                                | 36.07708223                                 |
| 205.2581117                                        | 0.860327028                                                | 36.72827412                                 |
| 366.2488623                                        | 0.897029078                                                | 48.11942649                                 |
| 117.0246714                                        | 0.795948809                                                | 21.73013076                                 |
| 205.434339                                         | 0.782567357                                                | 21.79427641                                 |
| 187.0344673                                        | 0.872928307                                                | 31.6229437                                  |
| 205.3681282                                        | 0.852026961                                                | 26.54033783                                 |
| 359.0278037                                        | 0.879848663                                                | 37.44185604                                 |
| 98.95227051                                        | 0.839421082                                                | 19.17565712                                 |
| 221.1780967                                        | 0.883031995                                                | 38.30597052                                 |
| 244.4930695                                        | 0.742836977                                                | 28.36159449                                 |
| 149.3519364                                        | 0.844751493                                                | 24.34418114                                 |
| 270.656528                                         | 0.894535111                                                | 35.50771162                                 |
| 225.1678426                                        | 0.792016611                                                | 33.37348819                                 |
| 160.3243304                                        | 0.835615594                                                | 21.03013992                                 |
| 224.9901903                                        | 0.825286055                                                | 28.0280569                                  |
| 236.6988507                                        | 0.871628742                                                | 38.71326527                                 |
| 246.2832932                                        | 0.920356775                                                | 36.15338843                                 |
| 366.1453179                                        | 0.902179847                                                | 41.73515556                                 |
| 273.4302125                                        | 0.874573928                                                | 34.80093143                                 |
| 185.5121271                                        | 0.857363489                                                | 33.04703858                                 |
| 150.3331435                                        | 0.821728606                                                | 22.64037174                                 |
| 273.6549617                                        | 0.84718357                                                 | 34.98291081                                 |
| 230.3243209                                        | 0.880877379                                                | 35.37860662                                 |
| 266.9188866                                        | 0.818668781                                                | 32.33971033                                 |
| 306.9662943                                        | 0.893247705                                                | 40.57186486                                 |
| 252.7069309                                        | 0.890123135                                                | 32.97109922                                 |
| 294.1840149                                        | 0.889597652                                                | 44.25412727                                 |
| 284.013212                                         | 0.866510422                                                | 33.5642406                                  |
| 104.7610755                                        | 0.799551664                                                | 15.47465597                                 |
| 244.3241113                                        | 0.856697757                                                | 31.69724863                                 |
| 191.0422604                                        | 0.879208385                                                | 28.98835805                                 |
| 300.6636865                                        | 0.889106948                                                | 31.40628099                                 |
| 473.6178871                                        | 0.893732291                                                | 62.63501179                                 |
| 193.8529693                                        | 0.828973114                                                | 27.90678639                                 |
| 204.3897982                                        | 0.884276434                                                | 25.49810654                                 |
| 253.4356271                                        | 0.847329248                                                | 35.29115849                                 |
| 178.9527443                                        | 0.846748757                                                | 25.31482094                                 |
| 174.5586889                                        | 0.77058933                                                 | 26.01583512                                 |
| 288.53738                                          | 0.905331208                                                | 44.33086842                                 |
| 360.3394389                                        | 0.895626212                                                | 41.58305887                                 |
| 430.4174849                                        | 0.87456018                                                 | 44.91021785                                 |
| 209.3063976                                        | 0.861109941                                                | 29.99879437                                 |
| 148.4333703                                        | 0.860226879                                                | 16.72282705                                 |
| 210.3673508                                        | 0.873453858                                                | 35.88979699                                 |
| 280.5437186                                        | 0.850563097                                                | 37.87719895                                 |
| 159.8831763                                        | 0.794274082                                                | 21.94684488                                 |
| 205.4918934                                        | 0.762495325                                                | 24.86699493                                 |
| 270.136715                                         | 0.907639123                                                | 33                                          |
| 252.5821301                                        | 0.857664847                                                | 40.21851895                                 |
| 363.9490844                                        | 0.898550127                                                | 45.14699781                                 |
| 218.8168758                                        | 0.86969144                                                 | 38.74609857                                 |
| 229.3942974                                        | 0.903082278                                                | 33.60912904                                 |
| 199.9195581                                        | 0.874114587                                                | 32.23069197                                 |
| 254.6734799                                        | 0.856586263                                                | 33.39383233                                 |
| 228.2734503                                        | 0.886865923                                                | 37.92638943                                 |
| 164.6910617                                        | 0.818320367                                                | 25.98298771                                 |
| 257.0636086                                        | 0.795777866                                                | 21.27686207                                 |
| 193.8579172                                        | 0.783412169                                                | 33.21529948                                 |
| 352.0399044                                        | 0.899606512                                                | 42.87113706                                 |
| 225.4429376                                        | 0.876089258                                                | 30.09574639                                 |
| 184.1704065                                        | 0.903526028                                                | 35.27648672                                 |
| 273.3099827                                        | 0.870193572                                                | 33.80591716                                 |
| 248.3047951                                        | 0.85601606                                                 | 26.20898616                                 |
| 361.9414016                                        | 0.922620538                                                | 54.30406956                                 |
| 340.8701944                                        | 0.899898104                                                | 38.26111507                                 |
| 335.0629345                                        | 0.856338018                                                | 38.83914688                                 |
| 250.5919298                                        | 0.897073405                                                | 29.625                                      |
| 160.6447432                                        | 0.853410017                                                | 24.494919                                   |
| 226.1245608                                        | 0.797886257                                                | 26.61253294                                 |
| 229.9725276                                        | 0.898613459                                                | 37.02691756                                 |
| 511.2109652                                        | 0.90864528                                                 | 47.45206226                                 |
| 194.3366875                                        | 0.864299748                                                | 26.77365602                                 |
| 188.7868103                                        | 0.897489434                                                | 26.58380165                                 |
| 291.7773639                                        | 0.824684184                                                | 39.46659388                                 |
| 192.1020232                                        | 0.895456796                                                | 39.03811873                                 |
| 139.1824078                                        | 0.798693176                                                | 22.33856529                                 |
| 178.0622222                                        | 0.824713752                                                | 26.75346415                                 |
| 143.9577648                                        | 0.814601165                                                | 23.96933281                                 |
| 452.0393225                                        | 0.920712919                                                | 71.89402367                                 |
| 314.5800799                                        | 0.862586526                                                | 37.45710784                                 |
| 192.3536819                                        | 0.91332894                                                 | 28.58984375                                 |
| 194.7583086                                        | 0.863107031                                                | 25.56855867                                 |
| 348.4778581                                        | 0.86059315                                                 | 50.51480792                                 |

| log.sigma.4.0.mm.3D_glszm_SmallAreaHighGrayLevelEmphasis | log.sigma.4.0.mm.3D_glszm_GrayLevelNonUniformityNormalized | log.sigma.4.0.mm.3D_glszm_SizeZoneNonUniformityNormalized |
|----------------------------------------------------------|------------------------------------------------------------|-----------------------------------------------------------|
| 236.476787                                               | 0.043458579                                                | 0.329158493                                               |
| 169.6353365                                              | 0.05002551                                                 | 0.319936224                                               |
| 116.6266921                                              | 0.057108864                                                | 0.318188578                                               |
| 213.6746773                                              | 0.046478039                                                | 0.309781641                                               |
| 235.7356104                                              | 0.041584484                                                | 0.379355687                                               |
| 113.0324226                                              | 0.063926447                                                | 0.264683613                                               |
| 78.57862163                                              | 0.064691358                                                | 0.23654321                                                |
| 261.948689                                               | 0.038285236                                                | 0.344796317                                               |
| 262.4376287                                              | 0.040096267                                                | 0.341949237                                               |
| 182.3528306                                              | 0.051981451                                                | 0.319111981                                               |
| 105.4548033                                              | 0.055374892                                                | 0.268899741                                               |
| 150.9790386                                              | 0.046519634                                                | 0.303819048                                               |
| 103.6817982                                              | 0.048757241                                                | 0.225750732                                               |
| 118.5462639                                              | 0.054009332                                                | 0.271728516                                               |
| 119.0524096                                              | 0.048316918                                                | 0.295518373                                               |
| 146.2922711                                              | 0.053644806                                                | 0.294527084                                               |
| 184.7850471                                              | 0.04679703                                                 | 0.353361191                                               |
| 163.1017081                                              | 0.045332424                                                | 0.306997058                                               |
| 235.8956058                                              | 0.041650896                                                | 0.336008115                                               |
| 98.06560824                                              | 0.060781649                                                | 0.286118782                                               |
| 155.6392489                                              | 0.0610631                                                  | 0.289567901                                               |
| 133.2515151                                              | 0.050103801                                                | 0.281076619                                               |
| 159.2577238                                              | 0.056186801                                                | 0.305792688                                               |
| 206.2200051                                              | 0.045520523                                                | 0.344533016                                               |
| 89.9498861                                               | 0.064005348                                                | 0.360507155                                               |
| 190.4019267                                              | 0.046325638                                                | 0.333207585                                               |
| 174.612602                                               | 0.054035857                                                | 0.280829446                                               |
| 132.807568                                               | 0.056549209                                                | 0.344471256                                               |
| 163.0634538                                              | 0.045752906                                                | 0.358271363                                               |
| 171.1569279                                              | 0.048623703                                                | 0.298155935                                               |
| 127.1306663                                              | 0.062810146                                                | 0.318559583                                               |
| 157.917709                                               | 0.052664614                                                | 0.297189422                                               |
| 143.158873                                               | 0.044516674                                                | 0.304336652                                               |
| 167.5487071                                              | 0.049256198                                                | 0.397024793                                               |
| 228.1326219                                              | 0.045511111                                                | 0.327644444                                               |
| 162.6439792                                              | 0.046749075                                                | 0.30058875                                                |
| 155.4761564                                              | 0.048354341                                                | 0.338885605                                               |
| 89.56504163                                              | 0.057766384                                                | 0.247537254                                               |
| 163.5055933                                              | 0.051091025                                                | 0.251218134                                               |
| 163.8937087                                              | 0.047368293                                                | 0.348382635                                               |
| 189.7177484                                              | 0.051921492                                                | 0.294389671                                               |
| 205.0928906                                              | 0.044166272                                                | 0.31817818                                                |
| 152.9247938                                              | 0.048250207                                                | 0.317100779                                               |
| 203.0355347                                              | 0.042216033                                                | 0.336290739                                               |
| 178.8126653                                              | 0.04796488                                                 | 0.289064586                                               |
| 90.51415247                                              | 0.070646295                                                | 0.293860044                                               |
| 155.536679                                               | 0.04855611                                                 | 0.289805862                                               |
| 122.8115426                                              | 0.05299277                                                 | 0.324311549                                               |
| 173.1463895                                              | 0.055206612                                                | 0.283305785                                               |
| 305.4604412                                              | 0.037688881                                                | 0.378548345                                               |
| 133.2963908                                              | 0.053149811                                                | 0.27278828                                                |
| 115.9310254                                              | 0.055946269                                                | 0.330869969                                               |
| 176.4128986                                              | 0.046952392                                                | 0.320816791                                               |
| 118.3665482                                              | 0.059320478                                                | 0.264352617                                               |
| 128.9081286                                              | 0.055595872                                                | 0.298810364                                               |
| 194.6875405                                              | 0.04186369                                                 | 0.35854042                                                |
| 246.5702225                                              | 0.042809203                                                | 0.361484067                                               |
| 238.9707691                                              | 0.043419471                                                | 0.319061249                                               |
| 155.5957046                                              | 0.052107446                                                | 0.329282407                                               |
| 82.08403719                                              | 0.071047241                                                | 0.231722069                                               |
| 166.3412796                                              | 0.046743232                                                | 0.324425447                                               |
| 182.4312888                                              | 0.046377168                                                | 0.327968556                                               |
| 110.6208445                                              | 0.060467156                                                | 0.28562128                                                |
| 138.440916                                               | 0.056042771                                                | 0.269739526                                               |
| 180.5626466                                              | 0.051097394                                                | 0.365397805                                               |
| 191.2412552                                              | 0.044616575                                                | 0.328996283                                               |
| 313.2246893                                              | 0.045434624                                                | 0.431877283                                               |
| 159.8492968                                              | 0.044237308                                                | 0.339394911                                               |
| 153.340744                                               | 0.048920728                                                | 0.350362899                                               |
| 155.559969                                               | 0.048733275                                                | 0.3310456                                                 |
| 186.4008418                                              | 0.047488906                                                | 0.318651422                                               |
| 164.5129931                                              | 0.045722526                                                | 0.318253851                                               |
| 134.5372105                                              | 0.055416001                                                | 0.304168138                                               |
| 181.6750358                                              | 0.060859524                                                | 0.275908211                                               |
| 125.0788552                                              | 0.049261387                                                | 0.29188958                                                |
| 247.7467868                                              | 0.043778941                                                | 0.362404167                                               |
| 146.7590582                                              | 0.052498701                                                | 0.293519962                                               |
| 150.33972                                                | 0.047461312                                                | 0.361860152                                               |
| 175.8692935                                              | 0.047597633                                                | 0.317723077                                               |
| 171.91897                                                | 0.054343727                                                | 0.293082113                                               |
| 291.7270957                                              | 0.038548753                                                | 0.429483825                                               |
| 216.5470887                                              | 0.045261263                                                | 0.38101242                                                |
| 210.4152808                                              | 0.044860216                                                | 0.308020077                                               |
| 134.418117                                               | 0.055664063                                                | 0.354003906                                               |
| 114.9374881                                              | 0.056194                                                   | 0.27839                                                   |
| 156.4859848                                              | 0.053799889                                                | 0.278187678                                               |
| 172.6663918                                              | 0.045795948                                                | 0.354964823                                               |
| 310.6947376                                              | 0.040830341                                                | 0.362247633                                               |
| 139.5440648                                              | 0.060900615                                                | 0.387026384                                               |
| 148.6571517                                              | 0.061157025                                                | 0.387107438                                               |
| 204.7575753                                              | 0.043876729                                                | 0.306702661                                               |
| 165.9916578                                              | 0.045371016                                                | 0.375163373                                               |
| 93.3379844                                               | 0.059570248                                                | 0.311709091                                               |
| 117.3002086                                              | 0.0537764                                                  | 0.275643509                                               |
| 104.5792473                                              | 0.056866137                                                | 0.277008928                                               |
| 259.8147014                                              | 0.034556213                                                | 0.360118343                                               |
| 177.2222979                                              | 0.045259035                                                | 0.29495867                                                |
| 143.9665877                                              | 0.058105469                                                | 0.411132813                                               |
| 87.36181341                                              | 0.060746173                                                | 0.231664541                                               |
| 299.9746999                                              | 0.040856561                                                | 0.390626191                                               |

| log.sigma.4.0.mm.3D_glszm_SizeZoneNonUniformity | log.sigma.4.0.mm.3D_glszm_GrayLevelNonUniformity | log.sigma.4.0.mm.3D_glszm_LargeAreaEmphasis | log.sigma.4.0.mm.3D_glszm_ZoneVariance |
|-------------------------------------------------|--------------------------------------------------|---------------------------------------------|----------------------------------------|
| 92.82269504                                     | 12.25531915                                      | 15.14893617                                 | 8.881193099                            |
| 179.1642857                                     | 28.01428571                                      | 148.0946429                                 | 134.3384917                            |
| 52.18292683                                     | 9.365853659                                      | 17.15853659                                 | 10.15541344                            |
| 293.6729958                                     | 44.06118143                                      | 27.27109705                                 | 19.54527742                            |
| 59.17948718                                     | 6.487179487                                      | 11.73717949                                 | 6.441280408                            |
| 56.90697674                                     | 13.74418605                                      | 20.02325581                                 | 11.07898323                            |
| 21.28888889                                     | 5.822222222                                      | 30.45555556                                 | 16.43469136                            |
| 154.46875                                       | 17.15178571                                      | 10.43303571                                 | 5.430624203                            |
| 282.7920193                                     | 33.15961306                                      | 17.98186215                                 | 11.66214037                            |
| 280.4994312                                     | 45.69169511                                      | 72.6370876                                  | 60.21527203                            |
| 79.32542373                                     | 16.3559322                                       | 17.50169492                                 | 9.642700373                            |
| 149.1751527                                     | 22.84114053                                      | 29.81670061                                 | 20.70638499                            |
| 114.4556213                                     | 24.7199211                                       | 59.26627219                                 | 42.53220203                            |
| 104.34375                                       | 20.73958333                                      | 20.02083333                                 | 11.54424371                            |
| 93.97484277                                     | 15.36477987                                      | 22.08490566                                 | 13.87794193                            |
| 275.6773504                                     | 50.21153846                                      | 3379.206197                                 | 3324.219986                            |
| 110.955414                                      | 14.69426752                                      | 9.694267516                                 | 4.752850014                            |
| 233.9317585                                     | 34.54330709                                      | 45.34645669                                 | 35.98060774                            |
| 86.3540856                                      | 10.70428016                                      | 9.774319066                                 | 4.645944677                            |
| 167.3794872                                     | 35.55726496                                      | 197.6974359                                 | 174.7721645                            |
| 312.7333333                                     | 65.94814815                                      | 440.0333333                                 | 416.636406                             |
| 161.3379791                                     | 28.75958188                                      | 23.67595819                                 | 14.69685197                            |
| 265.1222607                                     | 48.71395617                                      | 64.70703576                                 | 54.78489907                            |
| 70.62926829                                     | 9.331707317                                      | 11.0195122                                  | 5.514193932                            |
| 134.4691689                                     | 23.87399464                                      | 40.22520107                                 | 29.80597862                            |
| 93.96453901                                     | 13.06382979                                      | 15.21276596                                 | 9.156279865                            |
| 172.1484502                                     | 33.12398042                                      | 672.0783034                                 | 640.1087796                            |
| 160.5236052                                     | 26.35193133                                      | 41.26824034                                 | 31.81195546                            |
| 276.5854922                                     | 35.32124352                                      | 14.2888601                                  | 9.061832197                            |
| 192.0124224                                     | 31.3136646                                       | 185.4037267                                 | 169.8232996                            |
| 292.7562568                                     | 57.72252448                                      | 110.0446137                                 | 98.07858521                            |
| 486.4990837                                     | 86.21197312                                      | 83.80696396                                 | 70.68460155                            |
| 209.6879536                                     | 30.67198839                                      | 30.5065312                                  | 21.80017737                            |
| 21.83636364                                     | 2.709090909                                      | 5.490909091                                 | 1.915371901                            |
| 49.14666667                                     | 6.826666667                                      | 8.893333333                                 | 3.994488889                            |
| 209.2097701                                     | 32.53735632                                      | 23.12931034                                 | 14.70597173                            |
| 310.419214                                      | 44.29257642                                      | 45.51091703                                 | 35.62552202                            |
| 195.5544304                                     | 45.63544304                                      | 113.1392405                                 | 95.11437911                            |
| 59.78991597                                     | 12.15966387                                      | 36.86134454                                 | 24.55245039                            |
| 141.4433498                                     | 19.23152709                                      | 20.81034483                                 | 14.13461258                            |
| 106.5690608                                     | 18.79558011                                      | 104.5524862                                 | 87.97274198                            |
| 128.2258065                                     | 17.79900744                                      | 13.70471464                                 | 8.112604597                            |
| 203.8958009                                     | 31.02488336                                      | 15.59564541                                 | 9.074492864                            |
| 141.9146919                                     | 17.81516588                                      | 12.81279621                                 | 6.913192651                            |
| 182.9778831                                     | 30.36176935                                      | 27.21958926                                 | 18.41754079                            |
| 151.6317829                                     | 36.45348837                                      | 190.7906977                                 | 172.1470465                            |
| 377.6170376                                     | 63.2686109                                       | 43.67920184                                 | 32.9602364                             |
| 77.51046025                                     | 12.66527197                                      | 14.23012552                                 | 8.27979202                             |
| 15.58181818                                     | 3.036363636                                      | 9.381818182                                 | 3.445950413                            |
| 81.00934579                                     | 8.065420561                                      | 17.31308411                                 | 11.91940344                            |
| 250.9652174                                     | 48.89782609                                      | 50.52391304                                 | 76.67257089                            |
| 103.5623003                                     | 17.51118211                                      | 25.15335463                                 | 18.17227899                            |
| 405.1916073                                     | 59.30087094                                      | 44.56136184                                 | 35.4087009                             |
| 43.61818182                                     | 9.787878788                                      | 44.39393939                                 | 31.56451791                            |
| 400.704698                                      | 74.55406413                                      | 936.6122297                                 | 912.951006                             |
| 146.6430318                                     | 17.12224939                                      | 8.37408313                                  | 3.755262104                            |
| 348.8321244                                     | 41.31088083                                      | 10.79274611                                 | 5.628313243                            |
| 158.5734406                                     | 18.54124748                                      | 18.54124748                                 | 11.77287467                            |
| 94.83333333                                     | 15.00694444                                      | 29.14583333                                 | 21.15735918                            |
| 57.69879518                                     | 17.69076305                                      | 38.10040161                                 | 25.58187771                            |
| 242.9946595                                     | 35.01068091                                      | 40.84779706                                 | 32.84395928                            |
| 592.639181                                      | 83.80354178                                      | 49.19092418                                 | 40.00066519                            |
| 191.9375                                        | 40.63392857                                      | 265.6547619                                 | 244.5111873                            |
| 141.3435115                                     | 29.36641221                                      | 421.7270992                                 | 394.5639058                            |
| 39.46296296                                     | 5.518518519                                      | 7.064814815                                 | 3.027692044                            |
| 177                                             | 24.00371747                                      | 35.47769517                                 | 27.14513688                            |
| 79.8972973                                      | 8.405405405                                      | 9.037837838                                 | 4.502089116                            |
| 389.2859634                                     | 50.7401918                                       | 34.00784656                                 | 26.23896614                            |
| 72.17475728                                     | 10.0776699                                       | 8.504854369                                 | 3.817419172                            |
| 244.3116531                                     | 35.96476965                                      | 23.05826558                                 | 15.63300982                            |
| 339.0451128                                     | 50.52819549                                      | 30.09398496                                 | 21.93071966                            |
| 140.986456                                      | 20.25507901                                      | 15.48758465                                 | 8.992565567                            |
| 399.0685976                                     | 72.70579268                                      | 135.4588415                                 | 119.9429283                            |
| 395.1005587                                     | 87.15083799                                      | 252.1382682                                 | 230.1426922                            |
| 598.665529                                      | 101.0351048                                      | 1053.099951                                 | 1033.06658                             |
| 180.8396794                                     | 21.84569138                                      | 11.10220441                                 | 6.100393171                            |
| 117.9950249                                     | 21.10447761                                      | 20.86318408                                 | 13.14252741                            |
| 100.5971223                                     | 13.1942446                                       | 10.13669065                                 | 5.321981264                            |
| 206.52                                          | 30.93846154                                      | 23.79076923                                 | 16.42580828                            |
| 266.9978046                                     | 49.50713502                                      | 33.01866081                                 | 23.25903791                            |
| 117.2490842                                     | 10.52380952                                      | 5.648351648                                 | 2.240067625                            |
| 242.3238994                                     | 28.78616352                                      | 8.495283019                                 | 4.049550552                            |
| 293.851153                                      | 42.7966457                                       | 41.93710692                                 | 33.37197456                            |
| 22.65625                                        | 3.5625                                           | 11.078125                                   | 5.945068359                            |
| 278.39                                          | 56.194                                           | 43.785                                      | 32.286119                              |
| 318.5248908                                     | 61.60087336                                      | 345.4777293                                 | 322.6051097                            |
| 119.6231454                                     | 15.43323442                                      | 14.67062315                                 | 9.340964524                            |
| 267.3387534                                     | 30.13279133                                      | 8.905149051                                 | 4.48261984                             |
| 27.47887324                                     | 4.323943662                                      | 16.4084507                                  | 9.765125967                            |
| 21.29090909                                     | 3.363636364                                      | 5.945454545                                 | 2.300826446                            |
| 362.8292477                                     | 51.90617075                                      | 147.4429417                                 | 136.15266                              |
| 119.677116                                      | 14.47335423                                      | 13.10344828                                 | 8.205343894                            |
| 85.72                                           | 16.38181818                                      | 73.6                                        | 59.78864132                            |
| 291.0795455                                     | 56.78787879                                      | 123.4090909                                 | 108.4081404                            |
| 382.8263386                                     | 78.58900145                                      | 263.5383502                                 | 245.8886238                            |
| 46.81538462                                     | 4.492307692                                      | 5.807692308                                 | 2.020177515                            |
| 120.3431373                                     | 18.46568627                                      | 25.73529412                                 | 16.85255671                            |
| 26.3125                                         | 3.71875                                          | 6.328125                                    | 2.634521484                            |
| 25.94642857                                     | 6.803571429                                      | 28.59821429                                 | 17.14724171                            |
| 118.359736                                      | 12.37953795                                      | 30.58415842                                 | 23.49063817                            |

| log.sigma.4.0.mm.3D_glszm_ZonePercentage | log.sigma.4.0.mm.3D_glszm_LargeAreaLowGrayLevelEmphasis | log.sigma.4.0.mm.3D_glszm_LargeAreaHighGrayLevelEmphasis | log.sigma.4.0.mm.3D_glszm_HighGrayLevelZoneEmphasis |
|------------------------------------------|---------------------------------------------------------|----------------------------------------------------------|-----------------------------------------------------|
| 0.399433428                              | 0.147531509                                             | 3528.06383                                               | 366.1241135                                         |
| 0.269619644                              | 0.927406294                                             | 27941.63929                                              | 268.1625                                            |
| 0.377880184                              | 0.411082062                                             | 1804.713415                                              | 179.945122                                          |
| 0.359772296                              | 0.107350836                                             | 9547.746835                                              | 371.1170886                                         |
| 0.43454039                               | 0.085391992                                             | 4295.871795                                              | 371.2115385                                         |
| 0.33437014                               | 0.341996095                                             | 2720.306977                                              | 201.1209302                                         |
| 0.267062315                              | 0.697150451                                             | 2738.177778                                              | 139.3444444                                         |
| 0.447105788                              | 0.095667244                                             | 2971.424107                                              | 396.0290179                                         |
| 0.397787398                              | 0.091501651                                             | 5535.748489                                              | 412.5695284                                         |
| 0.28373144                               | 0.563125191                                             | 11766.57565                                              | 289.9078498                                         |
| 0.356711004                              | 0.262731882                                             | 3123.59661                                               | 205.6813559                                         |
| 0.331309042                              | 0.377399194                                             | 4901.04277                                               | 249.2362525                                         |
| 0.244455159                              | 1.05288576                                              | 6871.412229                                              | 198.0118343                                         |
| 0.343470483                              | 0.34517863                                              | 3761.882813                                              | 221.4921875                                         |
| 0.349066959                              | 0.293593928                                             | 3361.320755                                              | 208.1289308                                         |
| 0.134734418                              | 19.24098949                                             | 606779.4241                                              | 251.5128205                                         |
| 0.449856734                              | 0.11423565                                              | 2561.436306                                              | 282.9872611                                         |
| 0.326758148                              | 0.820182251                                             | 5088.463255                                              | 266.2388451                                         |
| 0.441580756                              | 0.089663388                                             | 3470.610895                                              | 382.5680934                                         |
| 0.208853981                              | 4.029400821                                             | 17659.91453                                              | 162.6290598                                         |
| 0.206738132                              | 2.878983226                                             | 72237.21944                                              | 262.4462963                                         |
| 0.33372093                               | 0.353767045                                             | 3478.972125                                              | 223.6916376                                         |
| 0.31746613                               | 0.575649745                                             | 8992.611303                                              | 257.1107266                                         |
| 0.426195426                              | 0.05562017                                              | 4239.107317                                              | 346.8585366                                         |
| 0.309800664                              | 1.121643477                                             | 2810.922252                                              | 130.3565684                                         |
| 0.406340058                              | 0.210999206                                             | 2390.776596                                              | 275.8156028                                         |
| 0.176860935                              | 3.376921712                                             | 140509.1941                                              | 308.3915171                                         |
| 0.325191905                              | 0.782330139                                             | 3781.263948                                              | 200.5042918                                         |
| 0.437393768                              | 0.108073307                                             | 4898.702073                                              | 260.7409326                                         |
| 0.253343824                              | 1.000134521                                             | 40819.78106                                              | 278.6071429                                         |
| 0.289084618                              | 1.5449069                                               | 9573.652884                                              | 205.6528836                                         |
| 0.276053963                              | 0.69306014                                              | 13776.82407                                              | 267.3982896                                         |
| 0.338908018                              | 0.315147934                                             | 6352.592163                                              | 251.8563135                                         |
| 0.528846154                              | 0.068324895                                             | 1350.018182                                              | 250.9090909                                         |
| 0.451807229                              | 0.046528849                                             | 3282.86                                                  | 377.1133333                                         |
| 0.344554455                              | 0.159380986                                             | 6205.409483                                              | 282.591954                                          |
| 0.318055556                              | 0.677594063                                             | 5110.472707                                              | 238.6375546                                         |
| 0.235539654                              | 1.545721765                                             | 15434.45949                                              | 172.0987342                                         |
| 0.28502994                               | 0.279417719                                             | 10195.20588                                              | 291.5210084                                         |
| 0.387035272                              | 0.259177264                                             | 4110.719212                                              | 256.1133005                                         |
| 0.245590231                              | 0.555252783                                             | 23101.98343                                              | 321.058011                                          |
| 0.422875131                              | 0.164383373                                             | 3102.590571                                              | 334.8263027                                         |
| 0.391595615                              | 0.138916629                                             | 3838.791602                                              | 255.7371695                                         |
| 0.411707317                              | 0.191745234                                             | 3114.559242                                              | 325.4123223                                         |
| 0.337060703                              | 0.153083686                                             | 6939.676145                                              | 312.5545024                                         |
| 0.231597846                              | 4.332550364                                             | 10809.43023                                              | 152.9457364                                         |
| 0.30543835                               | 0.285225305                                             | 9534.893323                                              | 271.5310821                                         |
| 0.409948542                              | 0.40505928                                              | 2050.506276                                              | 205.3556485                                         |
| 0.410447761                              | 0.128759297                                             | 2657.036364                                              | 310.6                                               |
| 0.430583501                              | 0.082181826                                             | 8122.453271                                              | 469.9579439                                         |
| 0.268691589                              | 0.837054884                                             | 13807.04022                                              | 234.8913043                                         |
| 0.378476421                              | 0.725700614                                             | 3419.408946                                              | 205.9840256                                         |
| 0.330541743                              | 0.315562504                                             | 9213.350752                                              | 292.3056215                                         |
| 0.279187817                              | 0.819427601                                             | 6595.727273                                              | 210.769697                                          |
| 0.205580254                              | 6.594258758                                             | 146847.3535                                              | 217.2841163                                         |
| 0.465301479                              | 0.092505026                                             | 2171.095355                                              | 305.99511                                           |
| 0.44003648                               | 0.06338439                                              | 3499.262176                                              | 386.6569948                                         |
| 0.384377417                              | 0.060651398                                             | 8235.955734                                              | 422.7706237                                         |
| 0.353808354                              | 0.334617727                                             | 4283.409722                                              | 253.9583333                                         |
| 0.282633371                              | 0.856171052                                             | 4226.052209                                              | 169.0321285                                         |
| 0.353468617                              | 0.753301196                                             | 3842.196262                                              | 263.7022697                                         |
| 0.329864914                              | 0.287276271                                             | 12019.29275                                              | 301.4947427                                         |
| 0.217475728                              | 2.144289493                                             | 38657.99405                                              | 193.3541667                                         |
| 0.191871109                              | 2.429122674                                             | 79752.60305                                              | 252.3931298                                         |
| 0.497695853                              | 0.072816859                                             | 1657.861111                                              | 289                                                 |
| 0.346426272                              | 0.221180489                                             | 7812.315985                                              | 298.7825279                                         |
| 0.469543147                              | 0.145800049                                             | 3007.383784                                              | 413.9945946                                         |
| 0.35877385                               | 0.608592514                                             | 5569.219704                                              | 256.8683522                                         |
| 0.461883408                              | 0.470017066                                             | 1663.815534                                              | 243.5776699                                         |
| 0.366981601                              | 0.286860234                                             | 3360.189702                                              | 240.2859079                                         |
| 0.35                                     | 0.264824365                                             | 5490.619361                                              | 302.3045113                                         |
| 0.39238264                               | 0.285174882                                             | 2541.065463                                              | 265.234763                                          |
| 0.253869969                              | 1.574220861                                             | 18152.77058                                              | 217.1051829                                         |
| 0.213222156                              | 1.340641824                                             | 54637.76816                                              | 320.6731844                                         |
| 0.223420479                              | 6.374934799                                             | 179780.6704                                              | 220.8425158                                         |
| 0.447132616                              | 0.082448447                                             | 3691.595159                                              | 378.5170341                                         |
| 0.359892569                              | 0.204018887                                             | 3818.487562                                              | 250.2711443                                         |
| 0.455737705                              | 0.753295237                                             | 1172.935252                                              | 222.3165468                                         |
| 0.368480726                              | 0.194305972                                             | 4865.8                                                   | 296.7446154                                         |
| 0.320098384                              | 0.246259209                                             | 6119.456641                                              | 288.1086718                                         |
| 0.541666667                              | 0.069604312                                             | 1629.604396                                              | 405.3516484                                         |
| 0.474272931                              | 0.055518411                                             | 2641.092767                                              | 347.6006289                                         |
| 0.341690544                              | 0.168834521                                             | 12852.93291                                              | 358.7389937                                         |
| 0.44137931                               | 0.076174466                                             | 2840.046875                                              | 239.875                                             |
| 0.29489826                               | 0.726571021                                             | 4589.99                                                  | 199.819                                             |
| 0.209094229                              | 2.098253927                                             | 61245.86725                                              | 277.9388646                                         |
| 0.433161954                              | 0.345119827                                             | 1805.448071                                              | 272.4718101                                         |
| 0.475515464                              | 0.034866161                                             | 4743.142276                                              | 506.2127371                                         |
| 0.387978142                              | 0.160576231                                             | 2521.619718                                              | 216.1267606                                         |
| 0.523809524                              | 0.111072967                                             | 915.3818182                                              | 213.5272727                                         |
| 0.297610063                              | 0.633652624                                             | 38956.80135                                              | 337.7075232                                         |
| 0.45184136                               | 0.655100003                                             | 1305.877743                                              | 238.1222571                                         |
| 0.269080235                              | 0.900024805                                             | 8578.050909                                              | 158.9309091                                         |
| 0.258190709                              | 1.125529362                                             | 19180.9858                                               | 208.5179924                                         |
| 0.238029625                              | 2.766003482                                             | 36439.59407                                              | 181.1432706                                         |
| 0.513833992                              | 0.092362971                                             | 2690.692308                                              | 438.4692308                                         |
| 0.335526316                              | 0.133724504                                             | 7994.296569                                              | 318.0196078                                         |
| 0.520325203                              | 0.213213025                                             | 1037.265625                                              | 209.15625                                           |
| 0.295514512                              | 0.371584843                                             | 5871.839286                                              | 186.7678571                                         |
| 0.375464684                              | 0.150751256                                             | 8267.722772                                              | 424.5478548                                         |

| log.sigma.4.0.mm.3D_glszm_SmallAreaEmphasis | log.sigma.4.0.mm.3D_glszm_LowGrayLevelZoneEmphasis | log.sigma.4.0.mm.3D_glszm_ZoneEntropy | log.sigma.4.0.mm.3D_glszm_SmallAreaLowGrayLevelEmphasis |
|---------------------------------------------|----------------------------------------------------|---------------------------------------|---------------------------------------------------------|
| 0.589614988                                 | 0.009902073                                        | 6.358317603                           | 0.007233219                                             |
| 0.584129297                                 | 0.009969859                                        | 6.513554188                           | 0.006320709                                             |
| 0.576982408                                 | 0.021942258                                        | 5.858369651                           | 0.009118672                                             |
| 0.571681278                                 | 0.005920803                                        | 6.723906659                           | 0.003844457                                             |
| 0.638251671                                 | 0.01413093                                         | 5.959074517                           | 0.0113241                                               |
| 0.524854648                                 | 0.016303129                                        | 6.092691153                           | 0.010862939                                             |
| 0.492701783                                 | 0.031376253                                        | 5.632030008                           | 0.011089803                                             |
| 0.605808155                                 | 0.010115278                                        | 6.567479665                           | 0.006926989                                             |
| 0.602780602                                 | 0.006359834                                        | 6.738937522                           | 0.004002969                                             |
| 0.581259699                                 | 0.00771953                                         | 6.544072855                           | 0.004499622                                             |
| 0.525164291                                 | 0.018690413                                        | 6.341489741                           | 0.010645429                                             |
| 0.567150969                                 | 0.012990746                                        | 6.610396335                           | 0.006370412                                             |
| 0.479574682                                 | 0.021660902                                        | 6.865394887                           | 0.011154808                                             |
| 0.526468434                                 | 0.013351699                                        | 6.392639629                           | 0.005330245                                             |
| 0.556218302                                 | 0.023198242                                        | 6.427882046                           | 0.01644531                                              |
| 0.559355263                                 | 0.010206948                                        | 6.716961115                           | 0.005156589                                             |
| 0.612479958                                 | 0.013417544                                        | 6.216805041                           | 0.008528241                                             |
| 0.565503623                                 | 0.012206244                                        | 6.663323042                           | 0.004792618                                             |
| 0.596475818                                 | 0.012678988                                        | 6.390029316                           | 0.005897323                                             |
| 0.55225279                                  | 0.019486335                                        | 6.476325496                           | 0.009666126                                             |
| 0.551993345                                 | 0.008529356                                        | 6.549649001                           | 0.00517156                                              |
| 0.542075262                                 | 0.014085536                                        | 6.66150356                            | 0.007858708                                             |
| 0.567790585                                 | 0.010241767                                        | 6.505405719                           | 0.006156199                                             |
| 0.601899527                                 | 0.011284468                                        | 6.153118088                           | 0.008281285                                             |
| 0.622897582                                 | 0.031381495                                        | 5.930015845                           | 0.016032474                                             |
| 0.594471435                                 | 0.017347406                                        | 6.251473567                           | 0.008320967                                             |
| 0.541683525                                 | 0.007851536                                        | 6.601321496                           | 0.005144716                                             |
| 0.605032001                                 | 0.016850119                                        | 6.111214287                           | 0.01018521                                              |
| 0.617783384                                 | 0.012736693                                        | 6.433028866                           | 0.008148968                                             |
| 0.55661303                                  | 0.010503903                                        | 6.60498163                            | 0.005171322                                             |
| 0.582989131                                 | 0.012612326                                        | 6.380766131                           | 0.007209189                                             |
| 0.561015626                                 | 0.008490194                                        | 6.777198993                           | 0.004762546                                             |
| 0.565307836                                 | 0.019746962                                        | 6.704333326                           | 0.009629167                                             |
| 0.647858586                                 | 0.030356335                                        | 5.113089032                           | 0.027213616                                             |
| 0.579197469                                 | 0.012921121                                        | 5.952711338                           | 0.010625078                                             |
| 0.563247264                                 | 0.010413294                                        | 6.675201243                           | 0.006532014                                             |
| 0.603833552                                 | 0.011699115                                        | 6.603993963                           | 0.006571133                                             |
| 0.504640569                                 | 0.01810215                                         | 6.724132595                           | 0.009554112                                             |
| 0.504851031                                 | 0.017222756                                        | 6.437363079                           | 0.008249067                                             |
| 0.610240913                                 | 0.013666811                                        | 6.336794135                           | 0.009417683                                             |
| 0.557612013                                 | 0.009400785                                        | 6.40887452                            | 0.006547319                                             |
| 0.576072985                                 | 0.009878115                                        | 6.450281641                           | 0.004244375                                             |
| 0.578561855                                 | 0.012036787                                        | 6.50199508                            | 0.007034761                                             |
| 0.597702955                                 | 0.013533507                                        | 6.495085832                           | 0.005095853                                             |
| 0.548786809                                 | 0.008037216                                        | 6.682750511                           | 0.005215927                                             |
| 0.553891399                                 | 0.01441259                                         | 6.119573098                           | 0.007980585                                             |
| 0.553541807                                 | 0.008942281                                        | 6.864718714                           | 0.005199557                                             |
| 0.582523728                                 | 0.023253806                                        | 6.070930916                           | 0.011268149                                             |
| 0.537338229                                 | 0.023615568                                        | 5.317545623                           | 0.007232063                                             |
| 0.637396041                                 | 0.012425375                                        | 6.28692734                            | 0.005775936                                             |
| 0.533484524                                 | 0.011581728                                        | 6.768671688                           | 0.006885176                                             |
| 0.590522384                                 | 0.015695376                                        | 6.073130915                           | 0.008018121                                             |
| 0.581489783                                 | 0.009377756                                        | 6.707373737                           | 0.005484382                                             |
| 0.524953298                                 | 0.018512901                                        | 6.03060216                            | 0.005740407                                             |
| 0.563360731                                 | 0.010120803                                        | 6.639417396                           | 0.005295325                                             |
| 0.618999908                                 | 0.017479224                                        | 6.405938457                           | 0.011866055                                             |
| 0.622320953                                 | 0.00695394                                         | 6.579750282                           | 0.004883959                                             |
| 0.574605909                                 | 0.00762034                                         | 6.623851864                           | 0.005778774                                             |
| 0.579682603                                 | 0.014061718                                        | 6.086550893                           | 0.005994952                                             |
| 0.472588926                                 | 0.016687593                                        | 6.181825417                           | 0.006485733                                             |
| 0.58762767                                  | 0.01292393                                         | 6.565558439                           | 0.008001654                                             |
| 0.592491237                                 | 0.008633018                                        | 6.833862578                           | 0.005367352                                             |
| 0.548026064                                 | 0.011966734                                        | 6.505791895                           | 0.007170892                                             |
| 0.528499305                                 | 0.009409974                                        | 6.536951324                           | 0.006145681                                             |
| 0.609885467                                 | 0.018507377                                        | 5.669400933                           | 0.013423068                                             |
| 0.588711524                                 | 0.011320684                                        | 6.53680676                            | 0.006816334                                             |
| 0.681106974                                 | 0.012173602                                        | 5.923881313                           | 0.004847486                                             |
| 0.602221479                                 | 0.015070357                                        | 6.668666192                           | 0.006833198                                             |
| 0.610445988                                 | 0.016693575                                        | 5.947258007                           | 0.007151637                                             |
| 0.593136427                                 | 0.01291803                                         | 6.506466596                           | 0.007161206                                             |
| 0.580579012                                 | 0.007683124                                        | 6.647551526                           | 0.004296276                                             |
| 0.578433521                                 | 0.016716463                                        | 6.476220836                           | 0.008593677                                             |
| 0.569320521                                 | 0.010596696                                        | 6.665607042                           | 0.004909007                                             |
| 0.538474584                                 | 0.005323491                                        | 6.664645905                           | 0.002445852                                             |
| 0.554306928                                 | 0.014487463                                        | 6.909241159                           | 0.009489855                                             |
| 0.621530945                                 | 0.010237465                                        | 6.383032242                           | 0.005676456                                             |
| 0.550612517                                 | 0.012237679                                        | 6.39021238                            | 0.007748507                                             |
| 0.619154741                                 | 0.023214296                                        | 6.080322918                           | 0.009701195                                             |
| 0.580336985                                 | 0.0094664                                          | 6.535744757                           | 0.004799681                                             |
| 0.557305692                                 | 0.007290394                                        | 6.622053513                           | 0.003398804                                             |
| 0.680800488                                 | 0.016292763                                        | 6.151306982                           | 0.012858987                                             |
| 0.639309878                                 | 0.009546783                                        | 6.337326204                           | 0.007597957                                             |
| 0.568875141                                 | 0.006445928                                        | 6.773494781                           | 0.004327232                                             |
| 0.598176709                                 | 0.027054699                                        | 5.378524414                           | 0.024396677                                             |
| 0.540410764                                 | 0.013892503                                        | 6.648384783                           | 0.005429862                                             |
| 0.540426484                                 | 0.007415221                                        | 6.78696575                            | 0.004346589                                             |
| 0.612356936                                 | 0.01281919                                         | 6.223483097                           | 0.008328209                                             |
| 0.619898451                                 | 0.005576548                                        | 6.507822191                           | 0.003990849                                             |
| 0.645459204                                 | 0.025557343                                        | 5.16046781                            | 0.023200392                                             |
| 0.63787232                                  | 0.028091659                                        | 5.085638577                           | 0.02273268                                              |
| 0.570019196                                 | 0.007719214                                        | 6.849350282                           | 0.003965789                                             |
| 0.631056179                                 | 0.019457947                                        | 6.158781101                           | 0.010862624                                             |
| 0.577433832                                 | 0.019494734                                        | 6.129476982                           | 0.012222473                                             |
| 0.536231626                                 | 0.014896661                                        | 6.739959574                           | 0.007516261                                             |
| 0.538842014                                 | 0.01781743                                         | 6.71998094                            | 0.008606046                                             |
| 0.609600362                                 | 0.016144012                                        | 6.008616229                           | 0.006517392                                             |
| 0.5562465                                   | 0.00910357                                         | 6.561640119                           | 0.003973658                                             |
| 0.660563862                                 | 0.02815937                                         | 4.991729297                           | 0.009572814                                             |
| 0.455002266                                 | 0.024872696                                        | 5.841167427                           | 0.008976783                                             |
| 0.647390552                                 | 0.00899259                                         | 6.30579736                            | 0.006942142                                             |



| log.sigma.4.0.mm.3D_ngtdm_Coarseness | log.sigma.4.0.mm.3D_ngtdm_Complexity | log.sigma.4.0.mm.3D_ngtdm_Strength | log.sigma.4.0.mm.3D_ngtdm_Busyness | log.sigma.4.0.mm.3D_ngtdm_Contrast |
|--------------------------------------|--------------------------------------|------------------------------------|------------------------------------|------------------------------------|
| 0.016223154                          | 1.381964469                          | 5.821439201                        | 0.122296674                        | 0.00021605                         |
| 0.006495857                          | 0.285539441                          | 1.79129878                         | 0.360102542                        | 4.10E-05                           |
| 0.023608935                          | 0.934409832                          | 4.230294007                        | 0.201314925                        | 0.000357672                        |
| 0.004352027                          | 0.401062089                          | 1.701382992                        | 0.343783734                        | 4.19E-05                           |
| 0.031595393                          | 2.205883808                          | 10.05456452                        | 0.065925641                        | 0.00060927                         |
| 0.015611613                          | 0.587618147                          | 2.471446909                        | 0.258059239                        | 0.000248553                        |
| 0.035267286                          | 0.589486649                          | 4.134540203                        | 0.172185344                        | 0.000327894                        |
| 0.010113982                          | 1.435597143                          | 4.508467282                        | 0.162947485                        | 0.000196261                        |
| 0.005526673                          | 0.568687453                          | 2.218494825                        | 0.306629605                        | 7.47E-05                           |
| 0.003789293                          | 0.217641101                          | 1.222188327                        | 0.584417055                        | 2.63E-05                           |
| 0.009907854                          | 0.661994103                          | 2.100362555                        | 0.309874886                        | 0.000231871                        |
| 0.008605539                          | 0.471098844                          | 2.629619016                        | 0.318738966                        | 8.16E-05                           |
| 0.005823139                          | 0.230811323                          | 1.434694632                        | 0.678932484                        | 6.09E-05                           |
| 0.009648576                          | 0.483683911                          | 2.229531551                        | 0.304464877                        | 0.000136711                        |
| 0.012655466                          | 0.571679641                          | 2.701782316                        | 0.264871681                        | 0.000156765                        |
| 0.002129222                          | 0.065707153                          | 0.929102025                        | 0.759818285                        | 3.79E-06                           |
| 0.014511237                          | 1.110298558                          | 4.109121276                        | 0.158447878                        | 0.000261284                        |
| 0.005070915                          | 0.326208797                          | 1.609749713                        | 0.638715322                        | 6.49E-05                           |
| 0.019171181                          | 1.802707613                          | 6.771574075                        | 0.088221983                        | 0.000339858                        |
| 0.004448735                          | 0.132683055                          | 0.972579492                        | 0.882860443                        | 2.77E-05                           |
| 0.002345902                          | 0.102929633                          | 0.77121666                         | 0.850038647                        | 8.56E-06                           |
| 0.006250136                          | 0.510590677                          | 2.463810162                        | 0.406118498                        | 6.48E-05                           |
| 0.004278457                          | 0.244950674                          | 1.440101445                        | 0.540563091                        | 2.99E-05                           |
| 0.022712455                          | 1.376531628                          | 6.393534671                        | 0.087127279                        | 0.000335126                        |
| 0.008123445                          | 0.26892746                           | 1.302556164                        | 0.706704956                        | 9.27E-05                           |
| 0.015745929                          | 1.245227293                          | 4.434501434                        | 0.179064289                        | 0.000253039                        |
| 0.003964464                          | 0.141808623                          | 1.39921749                         | 0.425608901                        | 1.10E-05                           |
| 0.007611289                          | 0.3407014                            | 1.753320747                        | 0.551793307                        | 8.89E-05                           |
| 0.00517051                           | 0.446150101                          | 1.43785829                         | 0.483325057                        | 0.00012474                         |
| 0.005306818                          | 0.288517015                          | 1.942102972                        | 0.352252071                        | 2.74E-05                           |
| 0.003356427                          | 0.173116814                          | 0.946927769                        | 0.900436198                        | 2.61E-05                           |
| 0.002089742                          | 0.129655017                          | 0.830536314                        | 0.98475805                         | 1.29E-05                           |
| 0.005787185                          | 0.370675995                          | 1.739916071                        | 0.427058797                        | 7.10E-05                           |
| 0.067677664                          | 6.364342355                          | 15.09628645                        | 0.047528643                        | 0.002963373                        |
| 0.026711905                          | 2.363851183                          | 7.868318497                        | 0.073295798                        | 0.00060949                         |
| 0.005289722                          | 0.429274636                          | 1.796237467                        | 0.386920355                        | 6.71E-05                           |
| 0.003698865                          | 0.305503892                          | 1.464535332                        | 0.782638409                        | 4.18E-05                           |
| 0.003477646                          | 0.115840344                          | 0.707438771                        | 1.054878022                        | 3.05E-05                           |
| 0.011783088                          | 0.874734539                          | 4.075067897                        | 0.14705305                         | 0.00012403                         |
| 0.010199647                          | 0.781251952                          | 3.099294113                        | 0.227551028                        | 0.00013792                         |
| 0.00865769                           | 0.506062223                          | 3.286687753                        | 0.194524119                        | 4.69E-05                           |
| 0.010852112                          | 1.059475926                          | 3.813552312                        | 0.194414456                        | 0.000200691                        |
| 0.005762081                          | 0.454816277                          | 1.586230765                        | 0.411779859                        | 0.000106558                        |
| 0.010587498                          | 0.959692712                          | 3.535725417                        | 0.210267711                        | 0.000191623                        |
| 0.005885987                          | 0.404180652                          | 1.758280891                        | 0.352887869                        | 6.18E-05                           |
| 0.004524664                          | 0.149488162                          | 0.905646644                        | 1.144857273                        | 3.74E-05                           |
| 0.002762577                          | 0.167920412                          | 0.833106707                        | 0.793160449                        | 2.37E-05                           |
| 0.015460317                          | 1.092022848                          | 3.827214771                        | 0.200834271                        | 0.000339923                        |
| 0.056775998                          | 4.319934033                          | 11.30269907                        | 0.049992634                        | 0.002079799                        |
| 0.021309027                          | 2.6766117                            | 10.82081509                        | 0.053597656                        | 0.000325022                        |
| 0.003552149                          | 0.193739183                          | 1.223131962                        | 0.657882087                        | 2.26E-05                           |
| 0.008906929                          | 0.621833682                          | 1.772849779                        | 0.440485509                        | 0.000388107                        |
| 0.003027608                          | 0.272154986                          | 1.291334381                        | 0.609739039                        | 2.56E-05                           |
| 0.01891536                           | 0.688842846                          | 3.597146942                        | 0.168074885                        | 0.000205045                        |
| 0.002116976                          | 0.07508274                           | 0.605932099                        | 1.148138421                        | 9.63E-06                           |
| 0.012289578                          | 1.173335687                          | 4.045967141                        | 0.171167421                        | 0.000211656                        |
| 0.004589327                          | 0.576883976                          | 1.726861007                        | 0.382240322                        | 8.16E-05                           |
| 0.007988344                          | 0.943904441                          | 3.835089089                        | 0.143905466                        | 8.92E-05                           |
| 0.014646513                          | 0.674226575                          | 3.431166811                        | 0.216979919                        | 0.000168234                        |
| 0.011768345                          | 0.346382351                          | 1.750181455                        | 0.388581828                        | 0.000155488                        |
| 0.004755031                          | 0.40852247                           | 1.584299232                        | 0.650897765                        | 8.07E-05                           |
| 0.002199773                          | 0.239392252                          | 1.285058772                        | 0.676478115                        | 1.57E-05                           |
| 0.00404888                           | 0.161106463                          | 1.296251721                        | 0.577838137                        | 1.52E-05                           |
| 0.004612382                          | 0.155471466                          | 1.05518581                         | 0.518521571                        | 2.22E-05                           |
| 0.046249846                          | 3.06652207                           | 10.91986219                        | 0.055346068                        | 0.000876398                        |
| 0.008122809                          | 0.531753094                          | 2.793007451                        | 0.260210261                        | 6.72E-05                           |
| 0.024028214                          | 2.646018379                          | 8.808028829                        | 0.066373295                        | 0.000483551                        |
| 0.003462864                          | 0.263971369                          | 1.058696647                        | 0.863682025                        | 5.89E-05                           |
| 0.020624938                          | 1.433380543                          | 4.932965379                        | 0.13973524                         | 0.000550118                        |
| 0.005638724                          | 0.355424324                          | 1.60894499                         | 0.535867109                        | 6.71E-05                           |
| 0.003610271                          | 0.309051986                          | 1.325046147                        | 0.633689862                        | 4.26E-05                           |
| 0.008742303                          | 0.799318992                          | 2.783089745                        | 0.312974833                        | 0.000174991                        |
| 0.002268779                          | 0.115247401                          | 0.671460759                        | 1.266573808                        | 1.67E-05                           |
| 0.001869419                          | 0.097612388                          | 0.668068099                        | 0.925703621                        | 7.62E-06                           |
| 0.001423792                          | 0.068407432                          | 0.562012545                        | 1.404944861                        | 5.98E-06                           |
| 0.009085719                          | 1.272862047                          | 4.106238682                        | 0.168834953                        | 0.000152136                        |
| 0.008931389                          | 0.770814666                          | 3.001088886                        | 0.257192596                        | 0.000115548                        |
| 0.016155552                          | 1.1866458                            | 4.003746948                        | 0.264514918                        | 0.000425741                        |
| 0.005690262                          | 0.498880682                          | 1.680771911                        | 0.440220517                        | 9.30E-05                           |
| 0.003831421                          | 0.260041697                          | 1.242233782                        | 0.576884269                        | 3.28E-05                           |
| 0.019002417                          | 2.746879542                          | 6.922938357                        | 0.102714515                        | 0.000565594                        |
| 0.007381417                          | 0.86420674                           | 2.823226574                        | 0.232686062                        | 0.000121913                        |
| 0.004580245                          | 0.363563999                          | 1.870537894                        | 0.326186303                        | 3.26E-05                           |
| 0.05274372                           | 3.127504404                          | 10.6350611                         | 0.051339779                        | 0.001257165                        |
| 0.003294109                          | 0.171387335                          | 0.873536769                        | 1.050310504                        | 3.26E-05                           |
| 0.002285582                          | 0.098453471                          | 0.710774047                        | 0.902751554                        | 1.04E-05                           |
| 0.013023239                          | 1.250273252                          | 4.504001124                        | 0.222731876                        | 0.000250977                        |
| 0.006042041                          | 0.927713321                          | 2.805318512                        | 0.209119429                        | 0.000136317                        |
| 0.049785903                          | 1.682790403                          | 7.561967728                        | 0.0830638                          | 0.00091464                         |
| 0.065004431                          | 4.713103322                          | 13.0650688                         | 0.057507637                        | 0.002259385                        |
| 0.003293881                          | 0.23106838                           | 1.284817237                        | 0.494290703                        | 2.22E-05                           |
| 0.013258331                          | 1.469844873                          | 4.686957473                        | 0.262266492                        | 0.000332132                        |
| 0.012093479                          | 0.300022368                          | 1.836829047                        | 0.375719606                        | 0.000104625                        |
| 0.002836281                          | 0.141818455                          | 0.810469712                        | 0.930300624                        | 2.08E-05                           |
| 0.001983524                          | 0.075791836                          | 0.450432676                        | 1.787351481                        | 1.65E-05                           |
| 0.033177035                          | 5.670835066                          | 14.09835203                        | 0.051809637                        | 0.001675732                        |
| 0.010271464                          | 0.488344822                          | 2.506006766                        | 0.214121825                        | 0.000110748                        |
| 0.064346227                          | 3.46022292                           | 8.998535481                        | 0.090251841                        | 0.002920531                        |
| 0.030088718                          | 0.890346606                          | 5.596548248                        | 0.104027645                        | 0.000314713                        |
| 0.014625241                          | 1.642632266                          | 7.350450692                        | 0.094447638                        | 0.000134517                        |

| log.sigma.3.5.mm.3D_gldm_GrayLevelVariance | log.sigma.3.5.mm.3D_gldm_HighGrayLevelEmphasis | log.sigma.3.5.mm.3D_gldm_GrayLevelNonUniformityNormalized | log.sigma.3.5.mm.3D_gldm_DependenceEntropy |
|--------------------------------------------|------------------------------------------------|-----------------------------------------------------------|--------------------------------------------|
| 35.17070998                                | 309.9036827                                    | 0.048559895                                               | 6.618006701                                |
| 22.27008465                                | 212.9147809                                    | 0.065663807                                               | 7.065927067                                |
| 24.19718512                                | 135.4170507                                    | 0.058039032                                               | 6.168095354                                |
| 32.30743984                                | 332.6948767                                    | 0.048621354                                               | 6.91222443                                 |
| 43.26670339                                | 339.3175487                                    | 0.04632956                                                | 6.489785798                                |
| 20.2656434                                 | 161.7387247                                    | 0.061257858                                               | 6.345732431                                |
| 13.91075029                                | 123.5074184                                    | 0.084855903                                               | 6.000722798                                |
| 46.08855841                                | 354.999002                                     | 0.04210541                                                | 6.606719629                                |
| 40.8679641                                 | 374.4617605                                    | 0.043736802                                               | 6.911815907                                |
| 21.43649405                                | 199.475468                                     | 0.065012684                                               | 6.820880008                                |
| 23.91007254                                | 240.0036276                                    | 0.060379074                                               | 6.251540257                                |
| 29.09601134                                | 212.7881242                                    | 0.053143343                                               | 6.842665149                                |
| 24.40925487                                | 162.0019286                                    | 0.058600815                                               | 6.76379458                                 |
| 27.09780755                                | 183.0572451                                    | 0.053568057                                               | 6.511787376                                |
| 24.55794467                                | 205.7277717                                    | 0.057464506                                               | 6.52697949                                 |
| 12.35181242                                | 201.0611775                                    | 0.121429647                                               | 7.083655347                                |
| 34.06821783                                | 251.7363897                                    | 0.048628501                                               | 6.448693804                                |
| 32.24820364                                | 176.0321612                                    | 0.050534145                                               | 6.93578363                                 |
| 45.04190137                                | 298.9020619                                    | 0.042837236                                               | 6.543160835                                |
| 15.8495845                                 | 116.7225991                                    | 0.07449971                                                | 6.980212219                                |
| 14.25791655                                | 238.9249617                                    | 0.079363724                                               | 6.90348486                                 |
| 27.77157382                                | 188.1767442                                    | 0.05430503                                                | 6.644482036                                |
| 22.07344053                                | 205.8044672                                    | 0.064161416                                               | 6.718413919                                |
| 31.01760452                                | 393.2827443                                    | 0.053712596                                               | 6.462891305                                |
| 15.61266156                                | 122.6079734                                    | 0.07535099                                                | 6.456204446                                |
| 33.28647568                                | 222.6066282                                    | 0.050199736                                               | 6.574348509                                |
| 14.56829637                                | 273.9864397                                    | 0.093006367                                               | 7.042919755                                |
| 22.34829113                                | 176.6071179                                    | 0.063073627                                               | 6.620663869                                |
| 37.22324262                                | 279.5943343                                    | 0.048025745                                               | 6.652659451                                |
| 22.08634422                                | 233.4901652                                    | 0.065247199                                               | 7.149653807                                |
| 18.24084189                                | 212.2991507                                    | 0.069843869                                               | 6.684400505                                |
| 22.88514812                                | 190.3758853                                    | 0.062635185                                               | 7.084212129                                |
| 32.38921543                                | 239.7038859                                    | 0.048440041                                               | 6.871889634                                |
| 37.25591716                                | 296.9615385                                    | 0.058431953                                               | 5.369635603                                |
| 36.85733597                                | 344.2680723                                    | 0.05247496                                                | 6.254957605                                |
| 30.73189001                                | 278.1554455                                    | 0.050238212                                               | 6.759683151                                |
| 29.54177035                                | 162.3513889                                    | 0.055365789                                               | 6.867299122                                |
| 19.35616352                                | 174.5569469                                    | 0.063442968                                               | 6.849003549                                |
| 25.06043817                                | 276.4443114                                    | 0.064207394                                               | 6.545655858                                |
| 29.65901703                                | 206.8102955                                    | 0.052819836                                               | 6.615649911                                |
| 21.84348932                                | 238.2367707                                    | 0.062296449                                               | 6.896859573                                |
| 38.88012341                                | 308.2119622                                    | 0.046184303                                               | 6.605162558                                |
| 30.79755423                                | 260.7021924                                    | 0.051518379                                               | 6.563372116                                |
| 40.51262439                                | 293.9590244                                    | 0.044424033                                               | 6.718333625                                |
| 26.04806764                                | 314.3785942                                    | 0.054851251                                               | 6.710154178                                |
| 13.8717101                                 | 85.79398564                                    | 0.080585675                                               | 6.539509055                                |
| 25.85851077                                | 243.6319737                                    | 0.054374486                                               | 6.823852116                                |
| 29.24936671                                | 179.0703259                                    | 0.052973177                                               | 6.409406797                                |
| 35.10113611                                | 408.6865672                                    | 0.065159278                                               | 5.423162071                                |
| 44.44033213                                | 431.5875252                                    | 0.053896822                                               | 6.393066932                                |
| 21.5045882                                 | 192.4617407                                    | 0.061798861                                               | 6.916089212                                |
| 32.36521627                                | 194.2116082                                    | 0.057422627                                               | 6.378503066                                |
| 28.19990711                                | 283.1457734                                    | 0.053738548                                               | 7.117395364                                |
| 20.21782462                                | 177.5059222                                    | 0.065440147                                               | 6.365440282                                |
| 17.93388519                                | 148.1379733                                    | 0.0860257                                                 | 7.113484673                                |
| 39.42111796                                | 267.2627986                                    | 0.044391897                                               | 6.578234259                                |
| 43.12969738                                | 372.4537164                                    | 0.041900721                                               | 6.775652124                                |
| 34.43132484                                | 362.9574633                                    | 0.053639414                                               | 6.717516876                                |
| 26.49794445                                | 216.7616708                                    | 0.055013915                                               | 6.639544011                                |
| 17.46142102                                | 150.3779796                                    | 0.066191164                                               | 6.438804917                                |
| 33.53236153                                | 182.9740444                                    | 0.051250055                                               | 6.745825096                                |
| 31.89298216                                | 279.8088719                                    | 0.050597758                                               | 7.137413473                                |
| 13.91065657                                | 182.2381877                                    | 0.084888931                                               | 6.852108307                                |
| 14.94332602                                | 234.6580007                                    | 0.084039778                                               | 7.010622046                                |
| 30.10367602                                | 277.6221198                                    | 0.053197137                                               | 6.064060844                                |
| 29.77621445                                | 280.3857051                                    | 0.055017209                                               | 6.825679107                                |
| 36.81633126                                | 326.8527919                                    | 0.053917906                                               | 6.383556459                                |
| 37.2079083                                 | 214.7716609                                    | 0.045928165                                               | 7.041563633                                |
| 32.07382513                                | 213.3565022                                    | 0.053469806                                               | 6.157947717                                |
| 29.4699664                                 | 201.1307807                                    | 0.052990254                                               | 6.793622097                                |
| 31.31254317                                | 252.7641447                                    | 0.052003982                                               | 6.944538698                                |
| 35.35211248                                | 202.720992                                     | 0.047909176                                               | 6.694281986                                |
| 20.37297662                                | 162.8306889                                    | 0.066155428                                               | 6.992496375                                |
| 17.03969353                                | 257.0451161                                    | 0.070539946                                               | 7.044658584                                |
| 18.75249733                                | 247.5527233                                    | 0.078907044                                               | 7.113718081                                |
| 42.27802508                                | 360.0501792                                    | 0.0432163                                                 | 6.707777275                                |
| 27.93478663                                | 236.0483438                                    | 0.053656801                                               | 6.589048119                                |
| 35.90098361                                | 161.3409836                                    | 0.049782317                                               | 6.394806354                                |
| 32.66164047                                | 284.1825397                                    | 0.049689944                                               | 6.726102404                                |
| 24.30541318                                | 224.6184118                                    | 0.057632885                                               | 6.755867706                                |
| 51.67393786                                | 348.3472222                                    | 0.040084089                                               | 6.565244448                                |
| 40.78045645                                | 353.1551081                                    | 0.043787929                                               | 6.635557194                                |
| 30.06112211                                | 333.7217049                                    | 0.052592446                                               | 6.962823884                                |
| 26.75414982                                | 356.4896552                                    | 0.073293698                                               | 5.448249263                                |
| 22.61011467                                | 157.2686523                                    | 0.05918115                                                | 6.775964244                                |
| 16.92866258                                | 224.1130387                                    | 0.076030688                                               | 6.999339273                                |
| 37.08339391                                | 203.785347                                     | 0.046500486                                               | 6.511842323                                |
| 46.73198533                                | 442.2087629                                    | 0.043739704                                               | 6.67246101                                 |
| 18.31682045                                | 195.8032787                                    | 0.071097972                                               | 5.831419189                                |
| 26.39038549                                | 233.4761905                                    | 0.062857143                                               | 5.34269058                                 |
| 27.91677962                                | 290.3730818                                    | 0.058667743                                               | 7.174122268                                |
| 40.92769383                                | 175.5665722                                    | 0.046714122                                               | 6.45579125                                 |
| 18.501124                                  | 146.7534247                                    | 0.068529532                                               | 6.86237971                                 |
| 20.19574632                                | 181.0699267                                    | 0.064435172                                               | 7.014653706                                |
| 18.63682482                                | 165.7328626                                    | 0.065942213                                               | 6.930544688                                |
| 74.0394632                                 | 435.3399209                                    | 0.037760315                                               | 6.32016817                                 |
| 27.20004112                                | 318.3289474                                    | 0.055549093                                               | 6.732263748                                |
| 33.3864763                                 | 247.5447154                                    | 0.055192015                                               | 5.577364887                                |
| 20.76402977                                | 195.8548813                                    | 0.066951636                                               | 6.212454173                                |
| 35.23297848                                | 352.929368                                     | 0.051929446                                               | 6.774467989                                |

| log.sigma.3.5.mm.3D_gldm_DependenceNonUniformity | log.sigma.3.5.mm.3D_gldm_GrayLevelNonUniformity | log.sigma.3.5.mm.3D_gldm_SmallDependenceEmphasis |
|--------------------------------------------------|-------------------------------------------------|--------------------------------------------------|
| 152.6033994                                      | 34.28328612                                     | 0.363608291                                      |
| 278.1324025                                      | 136.3837265                                     | 0.245705768                                      |
| 108.3963134                                      | 25.18894009                                     | 0.344147286                                      |
| 542.3753321                                      | 128.1172676                                     | 0.310163958                                      |
| 81.67409471                                      | 16.63231198                                     | 0.357170697                                      |
| 133.6096423                                      | 39.38880249                                     | 0.293175115                                      |
| 61.04747774                                      | 28.59643917                                     | 0.215947302                                      |
| 259.8522954                                      | 42.18962076                                     | 0.415237009                                      |
| 456.3631554                                      | 90.92881193                                     | 0.333305197                                      |
| 508.2834087                                      | 201.4092963                                     | 0.254239494                                      |
| 196.6324063                                      | 49.93349456                                     | 0.303315836                                      |
| 279.6518219                                      | 78.75843455                                     | 0.292513767                                      |
| 389.4744455                                      | 121.5380906                                     | 0.228742827                                      |
| 252.5313059                                      | 59.88908766                                     | 0.281951946                                      |
| 189.4895719                                      | 52.35016465                                     | 0.282550373                                      |
| 565.1292644                                      | 843.5717576                                     | 0.137961502                                      |
| 169.7048711                                      | 33.94269341                                     | 0.350526058                                      |
| 432.5574614                                      | 117.8456261                                     | 0.275708627                                      |
| 147.3264605                                      | 24.93127148                                     | 0.352495704                                      |
| 357.1727954                                      | 208.673688                                      | 0.19811082                                       |
| 683.8300153                                      | 414.5960949                                     | 0.203224092                                      |
| 365.7790698                                      | 93.40465116                                     | 0.301045835                                      |
| 495.4372025                                      | 175.2248261                                     | 0.277758325                                      |
| 103.02079                                        | 25.83575884                                     | 0.346187658                                      |
| 201.8770764                                      | 90.72259136                                     | 0.267322059                                      |
| 152.0057637                                      | 34.83861671                                     | 0.318817521                                      |
| 375.7051356                                      | 322.3600692                                     | 0.173036626                                      |
| 248.9413817                                      | 90.38450803                                     | 0.306623702                                      |
| 413.4147309                                      | 84.76543909                                     | 0.361224785                                      |
| 316.7254131                                      | 165.8583792                                     | 0.239932939                                      |
| 514.080843                                       | 222.0336584                                     | 0.255922277                                      |
| 926.3848229                                      | 371.4266442                                     | 0.238300744                                      |
| 422.2267585                                      | 98.47860305                                     | 0.29550506                                       |
| 33.78846154                                      | 6.076923077                                     | 0.404898504                                      |
| 84.48795181                                      | 17.42168675                                     | 0.404650217                                      |
| 429.5207921                                      | 101.4811881                                     | 0.277042613                                      |
| 508.5104167                                      | 159.4534722                                     | 0.284938267                                      |
| 552.9260584                                      | 212.7877162                                     | 0.233635639                                      |
| 162.4275449                                      | 53.61317365                                     | 0.260427413                                      |
| 226.6110582                                      | 55.40800763                                     | 0.319785529                                      |
| 231.6295794                                      | 91.82496608                                     | 0.241018538                                      |
| 221.6883526                                      | 44.01364113                                     | 0.35036207                                       |
| 373.4835566                                      | 84.59317905                                     | 0.329677294                                      |
| 243.7629268                                      | 45.53463415                                     | 0.325342311                                      |
| 389.1203408                                      | 103.0106496                                     | 0.29582374                                       |
| 327.7459605                                      | 179.5448833                                     | 0.212469953                                      |
| 846.1678387                                      | 231.9615565                                     | 0.289016005                                      |
| 130.4373928                                      | 30.88336192                                     | 0.338677926                                      |
| 37.88059701                                      | 8.731343284                                     | 0.385029022                                      |
| 118.7746479                                      | 26.78672032                                     | 0.341719606                                      |
| 578.6261682                                      | 211.5992991                                     | 0.233992298                                      |
| 163.5610641                                      | 47.4885127                                      | 0.306499249                                      |
| 643.0921225                                      | 205.3349908                                     | 0.282925361                                      |
| 114.2318105                                      | 38.6751269                                      | 0.241597958                                      |
| 710.4122336                                      | 561.1456385                                     | 0.19114371                                       |
| 225.6075085                                      | 39.02047782                                     | 0.371942484                                      |
| 539.6402189                                      | 91.88828089                                     | 0.403912101                                      |
| 273.6728538                                      | 69.35576179                                     | 0.330915672                                      |
| 157.9287469                                      | 44.78132678                                     | 0.313225831                                      |
| 166.2576617                                      | 58.31441544                                     | 0.229925062                                      |
| 423.2057574                                      | 108.5988674                                     | 0.296350098                                      |
| 995.2665206                                      | 277.1745162                                     | 0.291419829                                      |
| 402.2899676                                      | 262.3067961                                     | 0.198812234                                      |
| 298.7495423                                      | 229.5126327                                     | 0.176330748                                      |
| 53.21198157                                      | 11.5437788                                      | 0.411340246                                      |
| 306.7617514                                      | 85.44172569                                     | 0.300654323                                      |
| 89.80203046                                      | 21.24365482                                     | 0.36300865                                       |
| 614.3637785                                      | 146.8323428                                     | 0.30759618                                       |
| 111.0403587                                      | 23.84753363                                     | 0.358330245                                      |
| 407.0387867                                      | 106.5634013                                     | 0.322451906                                      |
| 563.9848684                                      | 158.0921053                                     | 0.297795421                                      |
| 241.8733392                                      | 54.0894597                                      | 0.319816944                                      |
| 743.8235294                                      | 341.8912539                                     | 0.231822235                                      |
| 873.9690292                                      | 473.7462775                                     | 0.205261825                                      |
| 1145.182571                                      | 724.3666667                                     | 0.207897457                                      |
| 274.390681                                       | 48.22939068                                     | 0.362918394                                      |
| 242.0241719                                      | 59.93464637                                     | 0.302279936                                      |
| 138.2721311                                      | 30.36721311                                     | 0.356149189                                      |
| 376.478458                                       | 87.65306122                                     | 0.327532662                                      |
| 541.0077301                                      | 164.0231904                                     | 0.287061954                                      |
| 126.0952381                                      | 20.20238095                                     | 0.40206537                                       |
| 346.9000746                                      | 58.71961223                                     | 0.404106363                                      |
| 525.3531519                                      | 146.8381089                                     | 0.307232896                                      |
| 39.33103448                                      | 10.62758621                                     | 0.401308429                                      |
| 615.5644353                                      | 200.6832793                                     | 0.269540178                                      |
| 743.6740611                                      | 416.3440467                                     | 0.204936995                                      |
| 185.5526992                                      | 36.17737789                                     | 0.361979648                                      |
| 395.9858247                                      | 67.88402062                                     | 0.383079612                                      |
| 35.20765027                                      | 13.01092896                                     | 0.311474891                                      |
| 33.68571429                                      | 6.6                                             | 0.511507937                                      |
| 612.8616352                                      | 233.2042767                                     | 0.255564499                                      |
| 169.4050992                                      | 32.98016997                                     | 0.38933504                                       |
| 152.5733855                                      | 70.037182                                       | 0.246721601                                      |
| 625.608313                                       | 263.5398533                                     | 0.229017983                                      |
| 850.6424389                                      | 382.8604891                                     | 0.213237105                                      |
| 72.8972332                                       | 9.553359684                                     | 0.455733421                                      |
| 241.1463816                                      | 67.54769737                                     | 0.293249009                                      |
| 35.34146341                                      | 6.788617886                                     | 0.438263324                                      |
| 80.68865435                                      | 25.37467018                                     | 0.253162709                                      |
| 148.9727385                                      | 41.9070632                                      | 0.332541526                                      |

| log.sigma.3.5.mm.3D_gldm_DependenceNonUniformityNormalized | log.sigma.3.5.mm.3D_gldm_DependenceVariance | log.sigma.3.5.mm.3D_gldm_LargeDependenceEmphasis |
|------------------------------------------------------------|---------------------------------------------|--------------------------------------------------|
| 0.216152124                                                | 2.394168961                                 | 9.424929178                                      |
| 0.133910642                                                | 9.539639619                                 | 26.76793452                                      |
| 0.249761091                                                | 1.378135021                                 | 7.479262673                                      |
| 0.205835041                                                | 2.526119203                                 | 10.60379507                                      |
| 0.227504442                                                | 1.718375866                                 | 8.21448468                                       |
| 0.207791046                                                | 2.123488024                                 | 10.30326594                                      |
| 0.181149786                                                | 2.482737367                                 | 13.70623145                                      |
| 0.259333628                                                | 1.325325397                                 | 6.502994012                                      |
| 0.219510897                                                | 2.051414995                                 | 9.201058201                                      |
| 0.16406824                                                 | 4.043697156                                 | 15.6714009                                       |
| 0.237765908                                                | 1.504299423                                 | 8.484885127                                      |
| 0.188698935                                                | 2.694999463                                 | 11.71120108                                      |
| 0.187789029                                                | 2.842592636                                 | 13.44744455                                      |
| 0.225877733                                                | 1.739891385                                 | 9.438282648                                      |
| 0.208001725                                                | 2.484055711                                 | 10.96487377                                      |
| 0.081348678                                                | 20.57175071                                 | 60.53591478                                      |
| 0.243130188                                                | 1.450472492                                 | 7.650429799                                      |
| 0.185487762                                                | 3.489272969                                 | 13.34219554                                      |
| 0.253138248                                                | 1.373106128                                 | 7.309278351                                      |
| 0.127516171                                                | 9.88980653                                  | 29.11995716                                      |
| 0.130901611                                                | 8.292881365                                 | 26.17036753                                      |
| 0.21266225                                                 | 2.033904813                                 | 9.834883721                                      |
| 0.181412377                                                | 3.676210631                                 | 13.74771146                                      |
| 0.214180437                                                | 2.514036506                                 | 9.852390852                                      |
| 0.16767199                                                 | 3.961589828                                 | 15.04318937                                      |
| 0.219028478                                                | 2.183100931                                 | 9.631123919                                      |
| 0.108397327                                                | 19.0780491                                  | 47.38315061                                      |
| 0.173720434                                                | 3.524639285                                 | 13.33775297                                      |
| 0.234229309                                                | 1.905558668                                 | 8.322379603                                      |
| 0.124596937                                                | 12.09825924                                 | 31.52478363                                      |
| 0.161711495                                                | 4.132354302                                 | 15.89084618                                      |
| 0.156220038                                                | 8.120925127                                 | 22.59426644                                      |
| 0.207686551                                                | 2.259582119                                 | 10.39596655                                      |
| 0.324889053                                                | 0.721523669                                 | 5.115384615                                      |
| 0.254481783                                                | 1.504681376                                 | 6.939759036                                      |
| 0.212634055                                                | 2.106951279                                 | 10.39108911                                      |
| 0.176566117                                                | 3.582978395                                 | 13.68125                                         |
| 0.164855712                                                | 4.351315938                                 | 16.653548                                        |
| 0.194524006                                                | 2.740673384                                 | 12.23592814                                      |
| 0.216025794                                                | 2.694154222                                 | 10.45853194                                      |
| 0.157143541                                                | 5.058436693                                 | 17.95793758                                      |
| 0.232621566                                                | 1.566919068                                 | 7.977964323                                      |
| 0.22745649                                                 | 1.710563601                                 | 8.549330085                                      |
| 0.23781749                                                 | 1.569012731                                 | 8.207804878                                      |
| 0.207199329                                                | 2.464237554                                 | 10.7199148                                       |
| 0.147103214                                                | 5.290761614                                 | 19.94165171                                      |
| 0.19835158                                                 | 2.593683656                                 | 11.28691983                                      |
| 0.223734808                                                | 2.080979379                                 | 9.085763293                                      |
| 0.282691022                                                | 1.055023391                                 | 6.134328358                                      |
| 0.238983195                                                | 1.552720751                                 | 7.969818913                                      |
| 0.168991287                                                | 7.283291322                                 | 20.41121495                                      |
| 0.197776377                                                | 2.419970494                                 | 10.75090689                                      |
| 0.168304664                                                | 5.914683116                                 | 17.43130071                                      |
| 0.193285635                                                | 2.229620277                                 | 12.03891709                                      |
| 0.10890882                                                 | 10.6564961                                  | 33.81526905                                      |
| 0.256663832                                                | 1.55044322                                  | 7.307167235                                      |
| 0.246073971                                                | 1.59144224                                  | 7.198814409                                      |
| 0.211657273                                                | 2.377255362                                 | 9.962103635                                      |
| 0.19401566                                                 | 3.163073728                                 | 11.92874693                                      |
| 0.188714713                                                | 2.405539572                                 | 12.77525539                                      |
| 0.199719565                                                | 2.621368811                                 | 11.15195847                                      |
| 0.181684286                                                | 4.586242211                                 | 14.80102227                                      |
| 0.130190928                                                | 8.457739655                                 | 26.77281553                                      |
| 0.109391996                                                | 11.70998883                                 | 36.17099963                                      |
| 0.245216505                                                | 1.510034191                                 | 7.055299539                                      |
| 0.197528494                                                | 3.208847798                                 | 12.0856407                                       |
| 0.227923935                                                | 1.675616481                                 | 8.065989848                                      |
| 0.192168839                                                | 3.240252704                                 | 12.13919299                                      |
| 0.248969414                                                | 1.841883006                                 | 8.058295964                                      |
| 0.202406159                                                | 2.796243733                                 | 10.92342118                                      |
| 0.185521338                                                | 3.466152614                                 | 12.86118421                                      |
| 0.214236793                                                | 2.073820001                                 | 9.559787422                                      |
| 0.143928702                                                | 6.717792842                                 | 21.64357585                                      |
| 0.130132375                                                | 7.956643057                                 | 25.6777844                                       |
| 0.124747557                                                | 9.540732624                                 | 28.96405229                                      |
| 0.245869786                                                | 1.383355173                                 | 7.297491039                                      |
| 0.216673386                                                | 1.903102456                                 | 9.501342883                                      |
| 0.226675625                                                | 2.3093362                                   | 9.137704918                                      |
| 0.213423162                                                | 2.180104997                                 | 9.646258503                                      |
| 0.190094072                                                | 2.889064752                                 | 12.03724526                                      |
| 0.250188964                                                | 1.686255984                                 | 7.317460317                                      |
| 0.258687602                                                | 1.387215902                                 | 6.700223714                                      |
| 0.188163736                                                | 3.442167962                                 | 12.58022923                                      |
| 0.271248514                                                | 1.422401902                                 | 6.696551724                                      |
| 0.181528881                                                | 3.102945756                                 | 13.03538779                                      |
| 0.135806502                                                | 7.860566408                                 | 24.91161432                                      |
| 0.238499613                                                | 1.943213434                                 | 8.341902314                                      |
| 0.255145506                                                | 1.371291782                                 | 6.926546392                                      |
| 0.192391532                                                | 2.438412613                                 | 10.8579235                                       |
| 0.320816327                                                | 0.82122449                                  | 4.485714286                                      |
| 0.154179028                                                | 9.133912994                                 | 23.70037736                                      |
| 0.239950565                                                | 1.603254982                                 | 7.456090652                                      |
| 0.149289027                                                | 11.29592411                                 | 27.61056751                                      |
| 0.152960468                                                | 8.732463101                                 | 23.79217604                                      |
| 0.146510926                                                | 5.368906861                                 | 20.03651395                                      |
| 0.288131357                                                | 1.130903467                                 | 5.56916996                                       |
| 0.198311169                                                | 2.716315357                                 | 11.42269737                                      |
| 0.287328971                                                | 1.017648225                                 | 5.520325203                                      |
| 0.212898824                                                | 2.495039717                                 | 11.68601583                                      |
| 0.184600667                                                | 3.099167907                                 | 11.89219331                                      |

| log.sigma.3.5.mm.3D_gldm_LargeDependenceLowGrayLevelEmphasis | log.sigma.3.5.mm.3D_gldm_SmallDependenceHighGrayLevelEmphasis | log.sigma.3.5.mm.3D_gldm_LargeDependenceHighGrayLevelEmphasis |
|--------------------------------------------------------------|---------------------------------------------------------------|---------------------------------------------------------------|
| 0.071775952                                                  | 133.238745                                                    | 2249.818697                                                   |
| 0.182789964                                                  | 64.40244749                                                   | 5131.246028                                                   |
| 0.286654002                                                  | 57.47169741                                                   | 794.0852535                                                   |
| 0.0520411                                                    | 101.6229609                                                   | 3525.811385                                                   |
| 0.078065048                                                  | 123.6847839                                                   | 2856.626741                                                   |
| 0.167631983                                                  | 53.31904457                                                   | 1402.121306                                                   |
| 0.26301756                                                   | 34.8878771                                                    | 1421.305638                                                   |
| 0.050366964                                                  | 161.9521433                                                   | 2102.707585                                                   |
| 0.046399888                                                  | 135.0823282                                                   | 3145.317941                                                   |
| 0.161187299                                                  | 64.99072611                                                   | 2456.23725                                                    |
| 0.068901903                                                  | 74.31162394                                                   | 1974.19468                                                    |
| 0.137747261                                                  | 72.98264226                                                   | 2016.255061                                                   |
| 0.20012321                                                   | 42.46493012                                                   | 1932.256509                                                   |
| 0.177423131                                                  | 54.92482102                                                   | 1695.284436                                                   |
| 0.103537638                                                  | 64.605497                                                     | 1987.183315                                                   |
| 0.367781934                                                  | 33.77295484                                                   | 10956.41428                                                   |
| 0.104733975                                                  | 88.5802883                                                    | 1902.919771                                                   |
| 0.339854734                                                  | 62.38712349                                                   | 1588.818611                                                   |
| 0.127887953                                                  | 109.8542096                                                   | 2134.128866                                                   |
| 0.563841059                                                  | 32.24403958                                                   | 2851.71296                                                    |
| 0.140720701                                                  | 57.97421865                                                   | 5588.390505                                                   |
| 0.152700598                                                  | 63.59331392                                                   | 1579.301163                                                   |
| 0.142060466                                                  | 71.74577119                                                   | 2164.755767                                                   |
| 0.037610557                                                  | 128.6498282                                                   | 4158.334719                                                   |
| 0.255984776                                                  | 43.76098674                                                   | 1347.564784                                                   |
| 0.128157603                                                  | 91.87506458                                                   | 1629.727666                                                   |
| 0.19863573                                                   | 56.12085017                                                   | 12117.18205                                                   |
| 0.173807741                                                  | 70.30579551                                                   | 1673.381717                                                   |
| 0.069513165                                                  | 94.79144297                                                   | 2543.087819                                                   |
| 0.173461066                                                  | 70.24307749                                                   | 7448.90716                                                    |
| 0.128649316                                                  | 68.50924018                                                   | 2572.298522                                                   |
| 0.243672928                                                  | 55.2826149                                                    | 3446.484486                                                   |
| 0.103593382                                                  | 73.01312917                                                   | 2434.332514                                                   |
| 0.109177141                                                  | 122.9057826                                                   | 1493.019231                                                   |
| 0.045449687                                                  | 140.3449411                                                   | 2288.231928                                                   |
| 0.069048772                                                  | 77.95882127                                                   | 2881.111881                                                   |
| 0.269219771                                                  | 60.08483277                                                   | 1717.701389                                                   |
| 0.186329671                                                  | 45.35326917                                                   | 2673.774597                                                   |
| 0.087870784                                                  | 74.13305221                                                   | 3484.116168                                                   |
| 0.166260248                                                  | 77.36810637                                                   | 1871.906578                                                   |
| 0.120114395                                                  | 64.53623061                                                   | 3923.293758                                                   |
| 0.06763822                                                   | 119.4705616                                                   | 2289.643232                                                   |
| 0.069809068                                                  | 87.61044456                                                   | 2295.523143                                                   |
| 0.077410615                                                  | 108.0704938                                                   | 2227.800976                                                   |
| 0.050493657                                                  | 99.46818816                                                   | 3255.865282                                                   |
| 0.652388893                                                  | 26.2482874                                                    | 1119.156643                                                   |
| 0.084288469                                                  | 78.19197697                                                   | 2530.822316                                                   |
| 0.26873246                                                   | 72.33983755                                                   | 1229.715266                                                   |
| 0.078573961                                                  | 152.5479063                                                   | 2650.641791                                                   |
| 0.061291816                                                  | 149.7479339                                                   | 3429.832998                                                   |
| 0.18346526                                                   | 53.46233334                                                   | 3369.783002                                                   |
| 0.254712659                                                  | 61.50013174                                                   | 1958.927449                                                   |
| 0.098237338                                                  | 91.42028244                                                   | 4336.846375                                                   |
| 0.20402989                                                   | 48.8773707                                                    | 2039.553299                                                   |
| 0.391345249                                                  | 35.30108674                                                   | 4398.555266                                                   |
| 0.104303406                                                  | 108.1643556                                                   | 1680.62116                                                    |
| 0.045446431                                                  | 162.4592823                                                   | 2479.763338                                                   |
| 0.058884604                                                  | 119.3724477                                                   | 3738.980665                                                   |
| 0.117576312                                                  | 78.81921356                                                   | 2126.609337                                                   |
| 0.207119246                                                  | 37.42670883                                                   | 1667.442679                                                   |
| 0.239982151                                                  | 70.43364347                                                   | 1455.688532                                                   |
| 0.088126819                                                  | 90.47187314                                                   | 3795.347755                                                   |
| 0.197709283                                                  | 42.91765928                                                   | 4420.734628                                                   |
| 0.181525004                                                  | 47.25742369                                                   | 8167.882461                                                   |
| 0.086250884                                                  | 125.053702                                                    | 1670.009217                                                   |
| 0.071395814                                                  | 93.23988688                                                   | 3073.489375                                                   |
| 0.130596531                                                  | 134.4050684                                                   | 2532.040609                                                   |
| 0.227837267                                                  | 78.61133374                                                   | 2088.842352                                                   |
| 0.208934549                                                  | 89.98476651                                                   | 1303.289238                                                   |
| 0.144535523                                                  | 78.69005211                                                   | 1719.760318                                                   |
| 0.115657608                                                  | 89.01961812                                                   | 2651.371382                                                   |
| 0.260713756                                                  | 75.31879348                                                   | 1563.11426                                                    |
| 0.244698741                                                  | 49.94270058                                                   | 2988.919698                                                   |
| 0.138399186                                                  | 63.71713264                                                   | 5870.361674                                                   |
| 0.144250977                                                  | 57.13827784                                                   | 6748.914597                                                   |
| 0.045874355                                                  | 132.8786762                                                   | 2565.675627                                                   |
| 0.083473217                                                  | 74.35701171                                                   | 2084.041182                                                   |
| 0.49592834                                                   | 70.56135821                                                   | 916.0688525                                                   |
| 0.086908787                                                  | 104.6263544                                                   | 2303.43424                                                    |
| 0.102295124                                                  | 73.48767568                                                   | 2307.880534                                                   |
| 0.07823535                                                   | 167.4124718                                                   | 1883.573413                                                   |
| 0.042014425                                                  | 145.2627716                                                   | 2411.50261                                                    |
| 0.056457354                                                  | 108.2969829                                                   | 3993.797636                                                   |
| 0.035920537                                                  | 142.4933563                                                   | 2305.951724                                                   |
| 0.234686496                                                  | 51.46835068                                                   | 1672.537305                                                   |
| 0.152832402                                                  | 55.63681414                                                   | 4809.869065                                                   |
| 0.187203623                                                  | 89.79350234                                                   | 1178.90617                                                    |
| 0.043356714                                                  | 171.8805515                                                   | 3007.609536                                                   |
| 0.09454325                                                   | 68.40349547                                                   | 1887.661202                                                   |
| 0.05566321                                                   | 133.8933862                                                   | 902.5428571                                                   |
| 0.117889291                                                  | 86.37571755                                                   | 6288.450063                                                   |
| 0.315896966                                                  | 88.95713296                                                   | 915.674221                                                    |
| 0.294936896                                                  | 39.38387909                                                   | 3788.178082                                                   |
| 0.200049038                                                  | 47.46171255                                                   | 4289.244988                                                   |
| 0.212556406                                                  | 42.5280675                                                    | 3009.393903                                                   |
| 0.089476149                                                  | 206.9741557                                                   | 2506.13834                                                    |
| 0.06260995                                                   | 90.59896266                                                   | 3731.504934                                                   |
| 0.235513978                                                  | 120.3873916                                                   | 1099.252033                                                   |
| 0.188120391                                                  | 48.66967592                                                   | 2338.804749                                                   |
| 0.05690658                                                   | 148.1998307                                                   | 3459.112763                                                   |

| log.sigma.3.5.mm.3D_gldm_SmallDependenceLowGrayLevelEmphasis | log.sigma.3.5.mm.3D_gldm_LowGrayLevelEmphasis | log.sigma.3.5.mm.3D_gldm_DistanceZoneVariabilityNormalized |
|--------------------------------------------------------------|-----------------------------------------------|------------------------------------------------------------|
| 0.003356741                                                  | 0.007603323                                   | 0.911860493                                                |
| 0.002947226                                                  | 0.009274318                                   | 0.899794989                                                |
| 0.008568765                                                  | 0.032551415                                   | 0.909750693                                                |
| 0.002322818                                                  | 0.006202386                                   | 0.872420133                                                |
| 0.005485719                                                  | 0.011717917                                   | 0.879292404                                                |
| 0.004973748                                                  | 0.015678815                                   | 0.876574356                                                |
| 0.004600861                                                  | 0.022894342                                   | 0.76446281                                                 |
| 0.00373519                                                   | 0.00779416                                    | 0.833227756                                                |
| 0.002104406                                                  | 0.005550236                                   | 0.921699292                                                |
| 0.002036428                                                  | 0.010053257                                   | 0.96771591                                                 |
| 0.003659879                                                  | 0.009182352                                   | 0.865329107                                                |
| 0.003506835                                                  | 0.01145552                                    | 0.954048443                                                |
| 0.004720909                                                  | 0.016638007                                   | 0.92781225                                                 |
| 0.004754954                                                  | 0.019238857                                   | 0.903630601                                                |
| 0.004085083                                                  | 0.011444766                                   | 0.91090925                                                 |
| 0.001058155                                                  | 0.007382688                                   | 0.934836521                                                |
| 0.004576714                                                  | 0.012864341                                   | 0.82106048                                                 |
| 0.00368748                                                   | 0.020973385                                   | 0.951560511                                                |
| 0.006559999                                                  | 0.016634733                                   | 0.85947462                                                 |
| 0.003127521                                                  | 0.020521801                                   | 0.971297955                                                |
| 0.001263493                                                  | 0.005713197                                   | 0.947196643                                                |
| 0.004573857                                                  | 0.014243102                                   | 0.86963927                                                 |
| 0.002379843                                                  | 0.009121002                                   | 0.948200845                                                |
| 0.004416515                                                  | 0.007105109                                   | 0.68119601                                                 |
| 0.004524863                                                  | 0.017319582                                   | 0.953989748                                                |
| 0.003839367                                                  | 0.014065571                                   | 0.943709305                                                |
| 0.001118576                                                  | 0.004974195                                   | 0.926349283                                                |
| 0.00324184                                                   | 0.011303558                                   | 0.961479229                                                |
| 0.004323728                                                  | 0.010134379                                   | 0.93960533                                                 |
| 0.001964489                                                  | 0.007893961                                   | 0.950308565                                                |
| 0.001768432                                                  | 0.007392199                                   | 0.97328342                                                 |
| 0.002615758                                                  | 0.011929254                                   | 0.96583237                                                 |
| 0.004193365                                                  | 0.012957028                                   | 0.934629871                                                |
| 0.00742545                                                   | 0.025421053                                   | 0.767011834                                                |
| 0.00642288                                                   | 0.010592794                                   | 0.813165719                                                |
| 0.002622684                                                  | 0.007671546                                   | 0.848030185                                                |
| 0.005168138                                                  | 0.020364665                                   | 0.954663604                                                |
| 0.003370707                                                  | 0.012194089                                   | 0.942603432                                                |
| 0.004531899                                                  | 0.010644805                                   | 0.791056241                                                |
| 0.00507701                                                   | 0.015048273                                   | 0.956855336                                                |
| 0.002415932                                                  | 0.008180411                                   | 0.92654405                                                 |
| 0.00300839                                                   | 0.009180662                                   | 0.875269581                                                |
| 0.003564116                                                  | 0.009453693                                   | 0.904174733                                                |
| 0.004013826                                                  | 0.010655996                                   | 0.835075452                                                |
| 0.00215949                                                   | 0.005656345                                   | 0.8972994                                                  |
| 0.004609081                                                  | 0.028648557                                   | 0.981885572                                                |
| 0.002536351                                                  | 0.008082625                                   | 0.877970071                                                |
| 0.007050556                                                  | 0.023155143                                   | 0.933412604                                                |
| 0.005636722                                                  | 0.018892208                                   | 0.644970414                                                |
| 0.004676893                                                  | 0.009741534                                   | 0.738617004                                                |
| 0.002276182                                                  | 0.010293409                                   | 0.93957495                                                 |
| 0.004599314                                                  | 0.019663163                                   | 0.935762298                                                |
| 0.001919213                                                  | 0.006312121                                   | 0.923257682                                                |
| 0.004277934                                                  | 0.016122912                                   | 0.87962108                                                 |
| 0.002809371                                                  | 0.014765556                                   | 0.951904697                                                |
| 0.007335571                                                  | 0.014909479                                   | 0.841031163                                                |
| 0.002972337                                                  | 0.00660032                                    | 0.757043819                                                |
| 0.004508772                                                  | 0.009262127                                   | 0.713113064                                                |
| 0.004078739                                                  | 0.011244331                                   | 0.905891579                                                |
| 0.004656307                                                  | 0.015612283                                   | 0.991379472                                                |
| 0.004871964                                                  | 0.018917681                                   | 0.935885709                                                |
| 0.002209016                                                  | 0.007098034                                   | 0.939084688                                                |
| 0.001926941                                                  | 0.008552284                                   | 0.939971807                                                |
| 0.00145545                                                   | 0.006121212                                   | 0.952582758                                                |
| 0.00716632                                                   | 0.012762001                                   | 0.946942149                                                |
| 0.002457147                                                  | 0.007647019                                   | 0.932057132                                                |
| 0.004111461                                                  | 0.01651459                                    | 0.778007952                                                |
| 0.004291976                                                  | 0.016256365                                   | 0.952489981                                                |
| 0.006167588                                                  | 0.017786145                                   | 0.921699292                                                |
| 0.004636788                                                  | 0.014208958                                   | 0.93474785                                                 |
| 0.001964071                                                  | 0.008403149                                   | 0.89844946                                                 |
| 0.004658647                                                  | 0.021205563                                   | 0.921013358                                                |
| 0.002441885                                                  | 0.012173685                                   | 0.945268152                                                |
| 0.001109609                                                  | 0.00553965                                    | 0.953660201                                                |
| 0.00161741                                                   | 0.006297718                                   | 0.947268307                                                |
| 0.003382743                                                  | 0.007308789                                   | 0.821938411                                                |
| 0.004700539                                                  | 0.010888308                                   | 0.851319204                                                |
| 0.008567084                                                  | 0.036775361                                   | 0.890878192                                                |
| 0.003789613                                                  | 0.010495684                                   | 0.855536199                                                |
| 0.002459957                                                  | 0.008445653                                   | 0.915225026                                                |
| 0.008671324                                                  | 0.013757316                                   | 0.827050364                                                |
| 0.004034738                                                  | 0.007876605                                   | 0.862539027                                                |
| 0.002023174                                                  | 0.005467185                                   | 0.914826333                                                |
| 0.009206762                                                  | 0.011891652                                   | 0.686728395                                                |
| 0.004055979                                                  | 0.016488473                                   | 0.97761481                                                 |
| 0.001487044                                                  | 0.006666735                                   | 0.772434638                                                |
| 0.004384146                                                  | 0.017691604                                   | 0.927274878                                                |
| 0.002632161                                                  | 0.006090905                                   | 0.806284991                                                |
| 0.008475413                                                  | 0.013887042                                   | 0.805175781                                                |
| 0.013899081                                                  | 0.018468863                                   | 0.88281225                                                 |
| 0.001848485                                                  | 0.007026016                                   | 0.912395729                                                |
| 0.009471357                                                  | 0.036856129                                   | 0.947406866                                                |
| 0.00706625                                                   | 0.019951242                                   | 0.895061728                                                |
| 0.003445405                                                  | 0.012205303                                   | 0.927438928                                                |
| 0.002429912                                                  | 0.011456013                                   | 0.957379246                                                |
| 0.005022073                                                  | 0.016138735                                   | 0.695874955                                                |
| 0.002691967                                                  | 0.008067414                                   | 0.950032873                                                |
| 0.0079031                                                    | 0.031302359                                   | 0.834710744                                                |
| 0.005858654                                                  | 0.015928141                                   | 0.787752675                                                |
| 0.002930073                                                  | 0.00630586                                    | 0.907625601                                                |

| log.sigma.3.5.mm.3D_gldzm_LowIntensityEmphasis | log.sigma.3.5.mm.3D_gldzm_LargeDistanceEmphasis | log.sigma.3.5.mm.3D_gldzm_HighIntensitySmallDistanceEmphasis |
|------------------------------------------------|-------------------------------------------------|--------------------------------------------------------------|
| 0.008809599                                    | 1.138613861                                     | 357.9348185                                                  |
| 0.011681384                                    | 1.158703072                                     | 255.7086177                                                  |
| 0.02685716                                     | 1.142105263                                     | 157.7973684                                                  |
| 0.007519548                                    | 1.205438066                                     | 315.183283                                                   |
| 0.015160548                                    | 1.193548387                                     | 333.4532258                                                  |
| 0.016878                                       | 1.198237885                                     | 178.215859                                                   |
| 0.027842759                                    | 1.409090909                                     | 155.6789773                                                  |
| 0.008622948                                    | 1.275449102                                     | 371.9416168                                                  |
| 0.006251321                                    | 1.12244898                                      | 394.9651861                                                  |
| 0.008968191                                    | 1.049234136                                     | 258.3498359                                                  |
| 0.011436666                                    | 1.217821782                                     | 240.7574257                                                  |
| 0.011998724                                    | 1.070588235                                     | 253.072549                                                   |
| 0.021122711                                    | 1.1125                                          | 185.9214286                                                  |
| 0.018759553                                    | 1.152284264                                     | 192.7652284                                                  |
| 0.014011847                                    | 1.140186916                                     | 227.8123053                                                  |
| 0.008547041                                    | 1.101156069                                     | 247.7723988                                                  |
| 0.013036678                                    | 1.298013245                                     | 244.1374172                                                  |
| 0.014019846                                    | 1.074509804                                     | 231.6686275                                                  |
| 0.0163004                                      | 1.228136882                                     | 304.8346008                                                  |
| 0.016728882                                    | 1.04368932                                      | 166.7144013                                                  |
| 0.006059366                                    | 1.081414474                                     | 291.7263569                                                  |
| 0.015210527                                    | 1.210280374                                     | 205.0673676                                                  |
| 0.008568995                                    | 1.079822616                                     | 260.6757206                                                  |
| 0.011550606                                    | 1.597014925                                     | 343.9067164                                                  |
| 0.017195831                                    | 1.070680628                                     | 161.2859948                                                  |
| 0.013331016                                    | 1.086956522                                     | 280.298913                                                   |
| 0.006254998                                    | 1.114874816                                     | 326.2290133                                                  |
| 0.010324767                                    | 1.058939096                                     | 231.8659136                                                  |
| 0.011698225                                    | 1.093506494                                     | 262.3175325                                                  |
| 0.008595289                                    | 1.076487252                                     | 288.2528329                                                  |
| 0.00681893                                     | 1.040625                                        | 269.2015625                                                  |
| 0.010890611                                    | 1.052158273                                     | 232.532524                                                   |
| 0.015131762                                    | 1.101488498                                     | 245.800406                                                   |
| 0.025750822                                    | 1.403846154                                     | 300.0769231                                                  |
| 0.014405704                                    | 1.312883436                                     | 336.0460123                                                  |
| 0.009212462                                    | 1.248546512                                     | 269.8055959                                                  |
| 0.01998219                                     | 1.069620253                                     | 208.9538502                                                  |
| 0.014504777                                    | 1.08871851                                      | 196.4153888                                                  |
| 0.01686535                                     | 1.355555556                                     | 265.5564815                                                  |
| 0.015700803                                    | 1.066176471                                     | 235.6360294                                                  |
| 0.010184087                                    | 1.114558473                                     | 267.0059666                                                  |
| 0.009419127                                    | 1.20049505                                      | 330.3508663                                                  |
| 0.010750947                                    | 1.151376147                                     | 261.1479358                                                  |
| 0.012253414                                    | 1.272058824                                     | 321.8829657                                                  |
| 0.007067662                                    | 1.162895928                                     | 327.8050528                                                  |
| 0.021203307                                    | 1.027422303                                     | 128.7198355                                                  |
| 0.008901028                                    | 1.195827725                                     | 260.910498                                                   |
| 0.021769526                                    | 1.103448276                                     | 210.6411638                                                  |
| 0.020168365                                    | 1.692307692                                     | 376.5230769                                                  |
| 0.013239565                                    | 1.463768116                                     | 412.1799517                                                  |
| 0.010298726                                    | 1.093555094                                     | 231.549896                                                   |
| 0.015910039                                    | 1.099667774                                     | 205.0398671                                                  |
| 0.006729278                                    | 1.119905956                                     | 319.0815047                                                  |
| 0.018006689                                    | 1.192982456                                     | 198.2266082                                                  |
| 0.014949272                                    | 1.073966642                                     | 188.3078318                                                  |
| 0.018624339                                    | 1.26119403                                      | 278.4235075                                                  |
| 0.007167023                                    | 1.424501425                                     | 380.115622                                                   |
| 0.013625912                                    | 1.520710059                                     | 335.8313609                                                  |
| 0.012592432                                    | 1.148514851                                     | 254.4966997                                                  |
| 0.018950105                                    | 1.012987013                                     | 172.6017316                                                  |
| 0.017803284                                    | 1.099469496                                     | 234.846817                                                   |
| 0.007669331                                    | 1.094339623                                     | 301.5078616                                                  |
| 0.009098888                                    | 1.092920354                                     | 216.3101032                                                  |
| 0.008065098                                    | 1.072897196                                     | 272.9                                                        |
| 0.015878672                                    | 1.081818182                                     | 299.1931818                                                  |
| 0.008766246                                    | 1.105633803                                     | 309.1698944                                                  |
| 0.015471344                                    | 1.38150289                                      | 345.8468208                                                  |
| 0.013313013                                    | 1.073043478                                     | 256.9219565                                                  |
| 0.016570922                                    | 1.12244898                                      | 244.5459184                                                  |
| 0.015358259                                    | 1.101298701                                     | 238.286039                                                   |
| 0.007226296                                    | 1.160962072                                     | 296.1327475                                                  |
| 0.01596473                                     | 1.123569794                                     | 230.9044622                                                  |
| 0.01067457                                     | 1.084476534                                     | 214.7841155                                                  |
| 0.005339203                                    | 1.071199487                                     | 314.9172547                                                  |
| 0.007951923                                    | 1.081300813                                     | 273.1587624                                                  |
| 0.008912272                                    | 1.296370968                                     | 351.7273185                                                  |
| 0.014782236                                    | 1.242647059                                     | 240.216299                                                   |
| 0.027255495                                    | 1.173745174                                     | 194.9816602                                                  |
| 0.011494389                                    | 1.235123367                                     | 309.8555878                                                  |
| 0.008568558                                    | 1.133064516                                     | 253.313256                                                   |
| 0.018722205                                    | 1.28685259                                      | 395.6822709                                                  |
| 0.009670212                                    | 1.222727273                                     | 340.8162879                                                  |
| 0.006433911                                    | 1.13372093                                      | 343.0193798                                                  |
| 0.019561899                                    | 1.583333333                                     | 342.1354167                                                  |
| 0.015610894                                    | 1.033962264                                     | 192.4959906                                                  |
| 0.007348441                                    | 1.392771084                                     | 248.688755                                                   |
| 0.014062243                                    | 1.113372093                                     | 240.7049419                                                  |
| 0.006655415                                    | 1.325997249                                     | 429.0464237                                                  |
| 0.025201373                                    | 1.328125                                        | 207.0117188                                                  |
| 0.024038238                                    | 1.1875                                          | 253.1445313                                                  |
| 0.007805673                                    | 1.137729549                                     | 330.653172                                                   |
| 0.030339533                                    | 1.081081081                                     | 221.6006006                                                  |
| 0.028339396                                    | 1.166666667                                     | 159.2017974                                                  |
| 0.01544459                                     | 1.113105925                                     | 208.731149                                                   |
| 0.011557216                                    | 1.065354884                                     | 203.8009487                                                  |
| 0.014202795                                    | 1.561151079                                     | 419.1834532                                                  |
| 0.009561429                                    | 1.076923077                                     | 306.1713287                                                  |
| 0.026270728                                    | 1.272727273                                     | 265.1022727                                                  |
| 0.022725826                                    | 1.362068966                                     | 176.5043103                                                  |
| 0.008547739                                    | 1.145631068                                     | 434.4231392                                                  |

| log.sigma.3.5.mm.3D_gldzm_LowIntensityLargeDistanceEmphasis | log.sigma.3.5.mm.3D_gldzm_HighIntensityEmphasis | log.sigma.3.5.mm.3D_gldzm_DistanceZoneVariability | log.sigma.3.5.mm.3D_gldzm_ZonePercentage |
|-------------------------------------------------------------|-------------------------------------------------|---------------------------------------------------|------------------------------------------|
| 0.010472483                                                 | 364.3432343                                     | 276.2932794                                       | 0.42917847                               |
| 0.013074315                                                 | 262.5290102                                     | 527.2798635                                       | 0.282137699                              |
| 0.028964155                                                 | 161.9736842                                     | 172.8526316                                       | 0.437788018                              |
| 0.008592698                                                 | 328.4612286                                     | 866.3131923                                       | 0.376850095                              |
| 0.017188834                                                 | 344.3161229                                     | 136.2903226                                       | 0.431754875                              |
| 0.019320881                                                 | 183.1718062                                     | 198.9823789                                       | 0.353032659                              |
| 0.090214628                                                 | 157.8522727                                     | 67.27272727                                       | 0.261127596                              |
| 0.010945413                                                 | 384.4311377                                     | 417.4471058                                       | 0.5                                      |
| 0.006745552                                                 | 405.0492197                                     | 767.7755102                                       | 0.400673401                              |
| 0.009546671                                                 | 260.4660832                                     | 884.4923414                                       | 0.295029051                              |
| 0.023001554                                                 | 248.9207921                                     | 262.1947195                                       | 0.366384522                              |
| 0.0127825                                                   | 255.3666667                                     | 486.5647059                                       | 0.344129555                              |
| 0.022266244                                                 | 189.8642857                                     | 519.575                                           | 0.270009643                              |
| 0.02056761                                                  | 197.5888325                                     | 356.0304569                                       | 0.352415027                              |
| 0.015165307                                                 | 233.4174455                                     | 292.4018692                                       | 0.352360044                              |
| 0.009076576                                                 | 253.7630058                                     | 970.3603083                                       | 0.149417015                              |
| 0.015484048                                                 | 256.0033113                                     | 247.9602649                                       | 0.432664756                              |
| 0.015554574                                                 | 232.8196078                                     | 727.9437908                                       | 0.328044597                              |
| 0.018674262                                                 | 313.7148289                                     | 226.0418251                                       | 0.451890034                              |
| 0.017358169                                                 | 168.0226537                                     | 600.2621359                                       | 0.220635487                              |
| 0.006824243                                                 | 295.9136513                                     | 1151.791118                                       | 0.232771822                              |
| 0.030329085                                                 | 211.7928349                                     | 558.3084112                                       | 0.373255814                              |
| 0.014631837                                                 | 262.559867                                      | 855.2771619                                       | 0.330281948                              |
| 0.037906302                                                 | 372.3731343                                     | 136.920398                                        | 0.417879418                              |
| 0.025519974                                                 | 163.7225131                                     | 364.4240838                                       | 0.317275748                              |
| 0.015053454                                                 | 282.1304348                                     | 260.4637681                                       | 0.397694524                              |
| 0.006654461                                                 | 335.8100147                                     | 628.9911635                                       | 0.195903058                              |
| 0.011522298                                                 | 233.6738703                                     | 489.3929273                                       | 0.355198883                              |
| 0.013552872                                                 | 266.0207792                                     | 723.4961039                                       | 0.436260623                              |
| 0.009115007                                                 | 292.1770538                                     | 670.917847                                        | 0.277734068                              |
| 0.007454289                                                 | 271.096875                                      | 934.3520833                                       | 0.301981755                              |
| 0.011431988                                                 | 234.9736211                                     | 1611.008393                                       | 0.281281619                              |
| 0.015851519                                                 | 250.0933694                                     | 690.691475                                        | 0.363502213                              |
| 0.090769068                                                 | 307.4615385                                     | 39.88461538                                       | 0.5                                      |
| 0.022156915                                                 | 349.3435583                                     | 132.5460123                                       | 0.490963855                              |
| 0.010547479                                                 | 283.2325581                                     | 583.4447674                                       | 0.340594059                              |
| 0.020761106                                                 | 212.0970464                                     | 905.021097                                        | 0.329166667                              |
| 0.01558342                                                  | 199.3110624                                     | 860.5969332                                       | 0.272212284                              |
| 0.020774959                                                 | 280.4148148                                     | 213.5851852                                       | 0.323353293                              |
| 0.016243837                                                 | 238.4191176                                     | 390.3970588                                       | 0.388941849                              |
| 0.011533297                                                 | 272.5083532                                     | 388.221957                                        | 0.284260516                              |
| 0.011201427                                                 | 339.6163366                                     | 353.6089109                                       | 0.423924449                              |
| 0.013397831                                                 | 265.0321101                                     | 591.3302752                                       | 0.398294762                              |
| 0.029400895                                                 | 329.2818627                                     | 340.7107843                                       | 0.39804878                               |
| 0.008803264                                                 | 336.2745098                                     | 594.9095023                                       | 0.353035144                              |
| 0.022079635                                                 | 129.2394881                                     | 537.0914077                                       | 0.24551167                               |
| 0.010931744                                                 | 270.9925976                                     | 1304.663526                                       | 0.348335677                              |
| 0.022884857                                                 | 213.3922414                                     | 216.5517241                                       | 0.397941681                              |
| 0.074747051                                                 | 396.3692308                                     | 41.92307692                                       | 0.485074627                              |
| 0.015735033                                                 | 439.2705314                                     | 152.8937198                                       | 0.416498994                              |
| 0.012863495                                                 | 234.8087318                                     | 903.8711019                                       | 0.280957944                              |
| 0.017407257                                                 | 207.0730897                                     | 281.6644518                                       | 0.363966143                              |
| 0.007773314                                                 | 324.8628527                                     | 1178.076803                                       | 0.339439994                              |
| 0.024658043                                                 | 202.8538012                                     | 150.4152047                                       | 0.289340102                              |
| 0.016004132                                                 | 190.4670051                                     | 1312.676577                                       | 0.211405795                              |
| 0.022707502                                                 | 289.5                                           | 338.0945274                                       | 0.457337884                              |
| 0.018070886                                                 | 399.6163343                                     | 797.1671415                                       | 0.480164159                              |
| 0.028516037                                                 | 356.964497                                      | 361.5483235                                       | 0.392111369                              |
| 0.01476805                                                  | 258.2046205                                     | 274.4851485                                       | 0.372235872                              |
| 0.022196859                                                 | 172.6147186                                     | 229.008658                                        | 0.262202043                              |
| 0.023024817                                                 | 238.3938992                                     | 705.6578249                                       | 0.355828221                              |
| 0.008034191                                                 | 309.0031447                                     | 1791.773585                                       | 0.3483023                                |
| 0.010486752                                                 | 220.6386431                                     | 637.300885                                        | 0.219417476                              |
| 0.008711018                                                 | 276.0598131                                     | 509.6317757                                       | 0.195898938                              |
| 0.016566187                                                 | 301.6818182                                     | 104.1636364                                       | 0.506912442                              |
| 0.009651809                                                 | 314.6549296                                     | 529.4084507                                       | 0.365743722                              |
| 0.018960547                                                 | 358.4971098                                     | 134.5953757                                       | 0.439086294                              |
| 0.014000864                                                 | 259.2704348                                     | 1095.363478                                       | 0.35971223                               |
| 0.018050271                                                 | 247.5612245                                     | 180.6530612                                       | 0.439461883                              |
| 0.02212274                                                  | 241.1155844                                     | 719.7558442                                       | 0.382894083                              |
| 0.011477884                                                 | 302.8390379                                     | 971.2238668                                       | 0.355592105                              |
| 0.017601988                                                 | 233.8581236                                     | 402.4828375                                       | 0.387068202                              |
| 0.011470254                                                 | 217.6779783                                     | 1309.19639                                        | 0.267995356                              |
| 0.005765918                                                 | 319.0795382                                     | 1486.756254                                       | 0.232132222                              |
| 0.008350376                                                 | 279.7773261                                     | 2097.252033                                       | 0.241176471                              |
| 0.011860916                                                 | 366.9798387                                     | 407.6814516                                       | 0.444444444                              |
| 0.020842695                                                 | 248.1593137                                     | 347.3382353                                       | 0.3652641                                |
| 0.034376644                                                 | 198.7606178                                     | 230.7374517                                       | 0.424590164                              |
| 0.02699471                                                  | 318.7271408                                     | 589.4644412                                       | 0.390589569                              |
| 0.010420955                                                 | 258.9284274                                     | 907.9032258                                       | 0.348559382                              |
| 0.020877802                                                 | 408.5697211                                     | 207.5896414                                       | 0.498015873                              |
| 0.016347049                                                 | 354.9742424                                     | 569.2757576                                       | 0.492170022                              |
| 0.006900936                                                 | 354.6996124                                     | 944.1007752                                       | 0.369627507                              |
| 0.07137215                                                  | 359.875                                         | 49.44444444                                       | 0.496551724                              |
| 0.016662172                                                 | 193.4292453                                     | 1036.271698                                       | 0.312592156                              |
| 0.010195587                                                 | 280.7959839                                     | 961.6811245                                       | 0.227355734                              |
| 0.015304911                                                 | 244.4069767                                     | 318.9825581                                       | 0.442159383                              |
| 0.013786383                                                 | 447.9614856                                     | 586.1691884                                       | 0.468427835                              |
| 0.028605068                                                 | 220.5                                           | 51.53125                                          | 0.349726776                              |
| 0.074493967                                                 | 256.71875                                       | 56.5                                              | 0.60952381                               |
| 0.008638887                                                 | 338.6803005                                     | 1093.050083                                       | 0.301383648                              |
| 0.032753043                                                 | 222.8168168                                     | 315.4864865                                       | 0.471671388                              |
| 0.032690072                                                 | 165.4052288                                     | 273.8888889                                       | 0.299412916                              |
| 0.019763224                                                 | 211.9910233                                     | 1033.166966                                       | 0.272371638                              |
| 0.013377882                                                 | 205.5839775                                     | 1362.350668                                       | 0.245091285                              |
| 0.02069804                                                  | 452.8633094                                     | 96.72661871                                       | 0.549407115                              |
| 0.009815184                                                 | 312.2097902                                     | 407.5641026                                       | 0.352796053                              |
| 0.091930451                                                 | 266.6818182                                     | 55.09090909                                       | 0.536585366                              |
| 0.030790238                                                 | 187.637931                                      | 91.37931034                                       | 0.306068602                              |
| 0.009698272                                                 | 441.0809061                                     | 280.4563107                                       | 0.382899628                              |



| log.sigma.3.5.mm.3D_gldzm_IntensityVariabilityNormalized | log.sigma.3.5.mm.3D_gldzm_LowIntensitySmallDistanceEmphasis | log.sigma.3.5.mm.3D_gldzm_IntensityVariability |
|----------------------------------------------------------|-------------------------------------------------------------|------------------------------------------------|
| 0.04580161                                               | 0.008393878                                                 | 13.87788779                                    |
| 0.050029703                                              | 0.011333151                                                 | 29.31740614                                    |
| 0.057285319                                              | 0.026330411                                                 | 10.88421053                                    |
| 0.045554531                                              | 0.00725126                                                  | 45.23564955                                    |
| 0.042580645                                              | 0.014653476                                                 | 6.6                                            |
| 0.064798463                                              | 0.01626728                                                  | 14.7092511                                     |
| 0.064566116                                              | 0.012249792                                                 | 5.681818182                                    |
| 0.041390273                                              | 0.008042332                                                 | 20.73652695                                    |
| 0.04067077                                               | 0.006127764                                                 | 33.8787515                                     |
| 0.052463742                                              | 0.008823571                                                 | 47.95185996                                    |
| 0.058545459                                              | 0.008545445                                                 | 17.73927393                                    |
| 0.046728181                                              | 0.01180278                                                  | 23.83137255                                    |
| 0.051033163                                              | 0.020836828                                                 | 28.57857143                                    |
| 0.053763302                                              | 0.018307539                                                 | 21.18274112                                    |
| 0.052047243                                              | 0.013723482                                                 | 16.70716511                                    |
| 0.055102632                                              | 0.008414657                                                 | 57.19653179                                    |
| 0.050195167                                              | 0.012424835                                                 | 15.1589404                                     |
| 0.04777137                                               | 0.013636164                                                 | 36.54509804                                    |
| 0.044282843                                              | 0.015706935                                                 | 11.64638783                                    |
| 0.060242352                                              | 0.01657156                                                  | 37.22977346                                    |
| 0.06071189                                               | 0.005868147                                                 | 73.82565789                                    |
| 0.051081608                                              | 0.011430887                                                 | 32.79439252                                    |
| 0.05547662                                               | 0.007053285                                                 | 50.03991131                                    |
| 0.048092869                                              | 0.004961683                                                 | 9.666666667                                    |
| 0.062018585                                              | 0.015114795                                                 | 23.69109948                                    |
| 0.045289855                                              | 0.012900406                                                 | 12.5                                           |
| 0.054149197                                              | 0.006155132                                                 | 36.76730486                                    |
| 0.056858666                                              | 0.010025384                                                 | 28.9410609                                     |
| 0.0462169                                                | 0.011234564                                                 | 35.58701299                                    |
| 0.04856792                                               | 0.008465359                                                 | 34.28895184                                    |
| 0.061386719                                              | 0.00666009                                                  | 58.93125                                       |
| 0.053107155                                              | 0.010755267                                                 | 88.58273381                                    |
| 0.046196722                                              | 0.014951823                                                 | 34.13937754                                    |
| 0.048816568                                              | 0.009496261                                                 | 2.538461538                                    |
| 0.045805262                                              | 0.012467901                                                 | 7.466257669                                    |
| 0.04901298                                               | 0.008878708                                                 | 33.72093023                                    |
| 0.049355516                                              | 0.019787461                                                 | 46.78902954                                    |
| 0.057021074                                              | 0.014235116                                                 | 52.06024096                                    |
| 0.049657064                                              | 0.015887948                                                 | 13.40740741                                    |
| 0.0471213                                                | 0.015565044                                                 | 19.2254902                                     |
| 0.051383849                                              | 0.009846784                                                 | 21.52983294                                    |
| 0.04526517                                               | 0.008973552                                                 | 18.28712871                                    |
| 0.048985776                                              | 0.010089225                                                 | 32.03669725                                    |
| 0.04203912                                               | 0.007966544                                                 | 17.15196078                                    |
| 0.048340534                                              | 0.006633761                                                 | 32.04977376                                    |
| 0.069753918                                              | 0.020984225                                                 | 38.15539305                                    |
| 0.048520149                                              | 0.00839335                                                  | 72.10094213                                    |
| 0.053247622                                              | 0.021490693                                                 | 12.35344828                                    |
| 0.046153846                                              | 0.006523694                                                 | 3                                              |
| 0.038437303                                              | 0.012615697                                                 | 7.956521739                                    |
| 0.054492762                                              | 0.009657534                                                 | 52.42203742                                    |
| 0.057979493                                              | 0.015535734                                                 | 17.45182724                                    |
| 0.046568676                                              | 0.006468268                                                 | 59.42163009                                    |
| 0.055983038                                              | 0.01634385                                                  | 9.573099415                                    |
| 0.055333788                                              | 0.014685556                                                 | 76.30529369                                    |
| 0.041434618                                              | 0.017603549                                                 | 16.65671642                                    |
| 0.042370688                                              | 0.004441057                                                 | 44.61633428                                    |
| 0.043233002                                              | 0.009903381                                                 | 21.91913215                                    |
| 0.049178185                                              | 0.012048527                                                 | 14.9009901                                     |
| 0.066921534                                              | 0.018138417                                                 | 15.45887446                                    |
| 0.045240591                                              | 0.016497901                                                 | 34.11140584                                    |
| 0.04601831                                               | 0.007578116                                                 | 87.80293501                                    |
| 0.059014453                                              | 0.009765672                                                 | 40.01179941                                    |
| 0.054638833                                              | 0.007903618                                                 | 29.2317757                                     |
| 0.054214876                                              | 0.015706793                                                 | 5.963636364                                    |
| 0.045508084                                              | 0.008544855                                                 | 25.84859155                                    |
| 0.047479034                                              | 0.014599043                                                 | 8.213872832                                    |
| 0.045618147                                              | 0.01314105                                                  | 52.46086957                                    |
| 0.053727613                                              | 0.016201085                                                 | 10.53061224                                    |
| 0.047923765                                              | 0.013667139                                                 | 36.9012987                                     |
| 0.048991024                                              | 0.006163398                                                 | 52.95929695                                    |
| 0.046557295                                              | 0.015555416                                                 | 20.34553776                                    |
| 0.05425276                                               | 0.010475649                                                 | 75.1400722                                     |
| 0.059963851                                              | 0.005232525                                                 | 93.48364336                                    |
| 0.049348443                                              | 0.00785231                                                  | 109.2574526                                    |
| 0.043314256                                              | 0.008175111                                                 | 21.48387097                                    |
| 0.050497405                                              | 0.013267121                                                 | 20.60294118                                    |
| 0.051445268                                              | 0.025475208                                                 | 13.32432432                                    |
| 0.047423645                                              | 0.007619309                                                 | 32.67489115                                    |
| 0.054591978                                              | 0.008105459                                                 | 54.15524194                                    |
| 0.039888256                                              | 0.018183306                                                 | 10.01195219                                    |
| 0.042479339                                              | 0.008001003                                                 | 28.03636364                                    |
| 0.045242173                                              | 0.006317155                                                 | 46.68992248                                    |
| 0.05632716                                               | 0.006609336                                                 | 4.055555556                                    |
| 0.056078676                                              | 0.015348074                                                 | 59.44339623                                    |
| 0.054362349                                              | 0.006636654                                                 | 67.6811245                                     |
| 0.047187669                                              | 0.013751576                                                 | 16.23255814                                    |
| 0.042924797                                              | 0.004872673                                                 | 31.20632737                                    |
| 0.068847656                                              | 0.024350449                                                 | 4.40625                                        |
| 0.059082031                                              | 0.011424306                                                 | 3.78125                                        |
| 0.044137279                                              | 0.00759737                                                  | 52.87646077                                    |
| 0.043818593                                              | 0.029736155                                                 | 14.59159159                                    |
| 0.054081763                                              | 0.027251727                                                 | 16.54901961                                    |
| 0.053262057                                              | 0.014364931                                                 | 59.33393178                                    |
| 0.057374357                                              | 0.01110205                                                  | 81.64371047                                    |
| 0.037523938                                              | 0.012578984                                                 | 5.215827338                                    |
| 0.046114724                                              | 0.00949799                                                  | 19.78321678                                    |
| 0.058769513                                              | 0.009855798                                                 | 3.878787879                                    |
| 0.061236623                                              | 0.020709723                                                 | 7.103448276                                    |
| 0.040688723                                              | 0.008260106                                                 | 12.57281553                                    |

| log.sigma.3.5.mm.3D_gldzm_HighIntensityLargeDistanceEmphasis | log.sigma.3.5.mm.3D_gldzm_SmallDistanceEmphasis | log.sigma.3.5.mm.3D_gldzm_SumVariance | log.sigma.3.5.mm.3D_gldzm_Homogeneity1 |
|--------------------------------------------------------------|-------------------------------------------------|---------------------------------------|----------------------------------------|
| 389.9768977                                                  | 0.965346535                                     | 812.7980508                           | 0.305489976                            |
| 289.8105802                                                  | 0.960324232                                     | 559.6691762                           | 0.401046522                            |
| 178.6789474                                                  | 0.964473684                                     | 292.1923258                           | 0.323285666                            |
| 381.5730111                                                  | 0.948640483                                     | 939.8629812                           | 0.310353017                            |
| 387.7677419                                                  | 0.951612903                                     | 894.7331784                           | 0.297183842                            |
| 202.9955947                                                  | 0.950440529                                     | 370.9730505                           | 0.33584478                             |
| 166.5454545                                                  | 0.897727273                                     | 267.7042214                           | 0.395229514                            |
| 434.3892216                                                  | 0.931137725                                     | 915.5572709                           | 0.263419088                            |
| 445.3853541                                                  | 0.969387755                                     | 1028.390826                           | 0.298325347                            |
| 268.9310722                                                  | 0.987691466                                     | 521.6002151                           | 0.372603906                            |
| 281.5742574                                                  | 0.945544554                                     | 600.4658319                           | 0.31629005                             |
| 264.5431373                                                  | 0.982352941                                     | 553.6292431                           | 0.33557947                             |
| 205.6357143                                                  | 0.971875                                        | 399.0617021                           | 0.364285729                            |
| 216.8832487                                                  | 0.961928934                                     | 448.6857575                           | 0.326756454                            |
| 255.8380062                                                  | 0.964953271                                     | 535.4473366                           | 0.33048139                             |
| 277.7254335                                                  | 0.974710983                                     | 563.3848167                           | 0.529492876                            |
| 303.4668874                                                  | 0.925496689                                     | 630.5994273                           | 0.291854181                            |
| 237.4235294                                                  | 0.981372549                                     | 425.7782232                           | 0.341901151                            |
| 349.2357414                                                  | 0.942965779                                     | 759.5114639                           | 0.276339769                            |
| 173.2556634                                                  | 0.98907767                                      | 262.8544356                           | 0.433221653                            |
| 312.6628289                                                  | 0.979646382                                     | 669.5990497                           | 0.418158663                            |
| 238.694704                                                   | 0.947429907                                     | 470.902663                            | 0.322164461                            |
| 270.0964523                                                  | 0.980044346                                     | 532.4399582                           | 0.35918046                             |
| 486.238806                                                   | 0.850746269                                     | 1144.824925                           | 0.308512678                            |
| 173.4685864                                                  | 0.982329843                                     | 277.7695909                           | 0.379885253                            |
| 289.4565217                                                  | 0.97826087                                      | 536.6126804                           | 0.30632244                             |
| 374.1340206                                                  | 0.971281296                                     | 801.9606289                           | 0.460561544                            |
| 240.9056974                                                  | 0.985265226                                     | 434.2550139                           | 0.360168703                            |
| 280.8337662                                                  | 0.976623377                                     | 767.6671749                           | 0.298652409                            |
| 307.8739377                                                  | 0.980878187                                     | 627.2523577                           | 0.410300305                            |
| 278.678125                                                   | 0.98984375                                      | 557.5081786                           | 0.378826727                            |
| 244.7380096                                                  | 0.986960432                                     | 498.8640493                           | 0.390068162                            |
| 267.2652233                                                  | 0.974627876                                     | 639.1501928                           | 0.322012058                            |
| 337                                                          | 0.899038462                                     | 758.5652604                           | 0.261077418                            |
| 402.5337423                                                  | 0.921779141                                     | 916.1194273                           | 0.276647307                            |
| 336.940407                                                   | 0.937863372                                     | 757.872995                            | 0.320568892                            |
| 224.6698312                                                  | 0.982594937                                     | 395.5786708                           | 0.349760079                            |
| 210.8937568                                                  | 0.977820372                                     | 445.1852644                           | 0.381727847                            |
| 339.8481481                                                  | 0.911111111                                     | 750.4411639                           | 0.335711565                            |
| 249.5514706                                                  | 0.983455882                                     | 506.9530713                           | 0.322552142                            |
| 294.5178998                                                  | 0.971360382                                     | 650.6887555                           | 0.374678288                            |
| 376.6782178                                                  | 0.949876238                                     | 799.7109183                           | 0.29100269                             |
| 280.5688073                                                  | 0.962155963                                     | 681.7408061                           | 0.304037708                            |
| 358.877451                                                   | 0.931985294                                     | 757.1081385                           | 0.290730626                            |
| 370.1523379                                                  | 0.959276018                                     | 881.130408                            | 0.321669751                            |
| 131.3180987                                                  | 0.993144424                                     | 170.8200507                           | 0.420751135                            |
| 311.320996                                                   | 0.951043069                                     | 668.2755306                           | 0.329932047                            |
| 224.3965517                                                  | 0.974137931                                     | 403.7606281                           | 0.313358171                            |
| 475.7538462                                                  | 0.826923077                                     | 1064.410607                           | 0.267928623                            |
| 547.6328502                                                  | 0.884057971                                     | 1154.341509                           | 0.284585974                            |
| 247.8440748                                                  | 0.976611227                                     | 494.0326832                           | 0.378459285                            |
| 215.2059801                                                  | 0.975083056                                     | 449.3487281                           | 0.31636884                             |
| 347.9882445                                                  | 0.970023511                                     | 770.9700839                           | 0.3452973                              |
| 221.3625731                                                  | 0.951754386                                     | 420.9488323                           | 0.356958081                            |
| 199.1036983                                                  | 0.981508339                                     | 369.6403192                           | 0.460384085                            |
| 333.8059701                                                  | 0.934701493                                     | 689.7221407                           | 0.275006746                            |
| 477.6191833                                                  | 0.893874644                                     | 977.7556924                           | 0.263738377                            |
| 441.4970414                                                  | 0.869822485                                     | 979.8899261                           | 0.298214622                            |
| 273.0363036                                                  | 0.962871287                                     | 537.5135576                           | 0.34237231                             |
| 172.6666667                                                  | 0.996753247                                     | 351.6013655                           | 0.37018178                             |
| 252.5822281                                                  | 0.975132626                                     | 431.5966681                           | 0.321748096                            |
| 338.9842767                                                  | 0.976415094                                     | 775.6207156                           | 0.339397868                            |
| 237.9528024                                                  | 0.976769912                                     | 481.3847199                           | 0.433687006                            |
| 288.6990654                                                  | 0.981775701                                     | 651.9999953                           | 0.456544876                            |
| 311.6363636                                                  | 0.979545455                                     | 688.2932216                           | 0.290847044                            |
| 336.5950704                                                  | 0.973591549                                     | 772.0153768                           | 0.328517457                            |
| 409.0982659                                                  | 0.904624277                                     | 816.0074201                           | 0.287140554                            |
| 268.6643478                                                  | 0.981739113                                     | 537.3357954                           | 0.326490137                            |
| 259.622449                                                   | 0.969387755                                     | 489.2809778                           | 0.298568875                            |
| 252.4337662                                                  | 0.974675325                                     | 519.4842332                           | 0.324332232                            |
| 329.6641998                                                  | 0.959759482                                     | 672.3197355                           | 0.329745264                            |
| 245.6727689                                                  | 0.969107551                                     | 478.7897187                           | 0.30698841                             |
| 229.2534296                                                  | 0.978880866                                     | 404.7052579                           | 0.396919626                            |
| 335.7286722                                                  | 0.982200128                                     | 720.0213037                           | 0.415490739                            |
| 306.2515808                                                  | 0.979674797                                     | 717.3558747                           | 0.419907467                            |
| 427.9899194                                                  | 0.925907258                                     | 955.657431                            | 0.271915688                            |
| 279.9313725                                                  | 0.939338235                                     | 600.470047                            | 0.312477698                            |
| 213.8764479                                                  | 0.956563707                                     | 357.5796406                           | 0.301920729                            |
| 354.2133527                                                  | 0.941219158                                     | 752.957298                            | 0.300753492                            |
| 281.3891129                                                  | 0.966733871                                     | 603.2599259                           | 0.33765727                             |
| 460.1195219                                                  | 0.928286853                                     | 862.2355606                           | 0.254796335                            |
| 411.6060606                                                  | 0.944318182                                     | 954.8260008                           | 0.27054733                             |
| 401.4205426                                                  | 0.966569767                                     | 964.341069                            | 0.330766965                            |
| 430.8333333                                                  | 0.854166667                                     | 954.7737226                           | 0.28819852                             |
| 197.1622642                                                  | 0.991509434                                     | 378.374155                            | 0.358718667                            |
| 409.2248996                                                  | 0.901807229                                     | 635.8734893                           | 0.406266163                            |
| 259.2151163                                                  | 0.971656977                                     | 482.7930308                           | 0.300056858                            |
| 523.6217331                                                  | 0.918500688                                     | 1168.903416                           | 0.263330232                            |
| 274.453125                                                   | 0.91796875                                      | 495.8339304                           | 0.358493712                            |
| 271.015625                                                   | 0.953125                                        | 553.0753973                           | 0.281059808                            |
| 370.7888147                                                  | 0.965567613                                     | 805.2493102                           | 0.368935264                            |
| 227.6816817                                                  | 0.97972973                                      | 389.823211                            | 0.284609905                            |
| 190.2189542                                                  | 0.958333333                                     | 355.7619387                           | 0.400510819                            |
| 225.0305206                                                  | 0.971723519                                     | 461.5076623                           | 0.389207671                            |
| 212.7160928                                                  | 0.983661279                                     | 411.9368056                           | 0.400887973                            |
| 587.5827338                                                  | 0.85971223                                      | 1139.867295                           | 0.233613651                            |
| 336.3636364                                                  | 0.980769231                                     | 923.2711588                           | 0.336064117                            |
| 273                                                          | 0.931818182                                     | 579.6239268                           | 0.261160027                            |
| 232.1724138                                                  | 0.909482759                                     | 484.4249642                           | 0.354588491                            |
| 467.7119741                                                  | 0.963592233                                     | 956.6221756                           | 0.325544975                            |

| log.sigma.3.5.mm.3D_glcml_Homogeneity2 | log.sigma.3.5.mm.3D_glcml_ClusterShade | log.sigma.3.5.mm.3D_glcml_MaximumProbability | log.sigma.3.5.mm.3D_glcml_Idmn | log.sigma.3.5.mm.3D_glcml_SumVariance2 |
|----------------------------------------|----------------------------------------|----------------------------------------------|--------------------------------|----------------------------------------|
| 0.21468837                             | 235.7205983                            | 0.013072684                                  | 0.97513021                     | 103.1692039                            |
| 0.327063111                            | 205.6362448                            | 0.037132633                                  | 0.980676087                    | 67.8245241                             |
| 0.23183576                             | 258.1255939                            | 0.016151818                                  | 0.963363626                    | 70.57196469                            |
| 0.220645005                            | -93.14427195                           | 0.010154757                                  | 0.975962067                    | 91.58651257                            |
| 0.204390403                            | 17.12913032                            | 0.016311343                                  | 0.968445054                    | 141.4625304                            |
| 0.242465577                            | 33.48604243                            | 0.013990968                                  | 0.968942484                    | 58.92531559                            |
| 0.312939967                            | 97.61245445                            | 0.029502616                                  | 0.973396048                    | 42.47228505                            |
| 0.170434094                            | 262.8517607                            | 0.008074778                                  | 0.971830797                    | 131.7749704                            |
| 0.207887515                            | 320.608924                             | 0.009121444                                  | 0.974583435                    | 118.4158437                            |
| 0.289197318                            | 249.8661932                            | 0.016116154                                  | 0.980125422                    | 65.28228555                            |
| 0.224391771                            | -107.7775516                           | 0.013624155                                  | 0.964607173                    | 68.24063582                            |
| 0.24644651                             | 323.9648348                            | 0.012520139                                  | 0.976785513                    | 89.00533234                            |
| 0.27715367                             | 372.7622444                            | 0.014380788                                  | 0.978723089                    | 77.90508797                            |
| 0.234134429                            | -17.15788209                           | 0.01109804                                   | 0.971707608                    | 84.2479606                             |
| 0.23902513                             | 159.7716656                            | 0.014475878                                  | 0.970678344                    | 75.90820914                            |
| 0.476490052                            | 98.18566527                            | 0.131579321                                  | 0.990563309                    | 41.63363289                            |
| 0.1984461                              | -64.16823954                           | 0.009680291                                  | 0.967081996                    | 104.8737212                            |
| 0.256496596                            | 533.8319266                            | 0.012039142                                  | 0.973375061                    | 98.61705903                            |
| 0.183891223                            | -274.0259485                           | 0.012097068                                  | 0.964115771                    | 138.5878217                            |
| 0.35985415                             | 125.0845953                            | 0.043604801                                  | 0.980005132                    | 47.69587808                            |
| 0.341738675                            | 91.36303023                            | 0.027466066                                  | 0.987965566                    | 41.65285997                            |
| 0.229387546                            | 409.6948622                            | 0.010159927                                  | 0.979739439                    | 88.59347567                            |
| 0.272975448                            | 263.7137799                            | 0.016271896                                  | 0.980274138                    | 70.27385509                            |
| 0.214863034                            | -579.6030201                           | 0.018000698                                  | 0.972746808                    | 98.01544894                            |
| 0.295594386                            | 126.4642616                            | 0.025096185                                  | 0.975979797                    | 42.54654051                            |
| 0.217249436                            | 347.2636065                            | 0.012990781                                  | 0.968345421                    | 93.88227936                            |
| 0.392420865                            | 150.3600455                            | 0.082326001                                  | 0.988223836                    | 43.90939865                            |
| 0.274543194                            | 313.6215453                            | 0.01802141                                   | 0.979083006                    | 68.02071919                            |
| 0.209063317                            | -229.2665794                           | 0.011950956                                  | 0.966744013                    | 112.517196                             |
| 0.337625575                            | 93.95346293                            | 0.036634764                                  | 0.986048451                    | 64.36931386                            |
| 0.295466812                            | 247.5456828                            | 0.022209215                                  | 0.981966941                    | 54.84720245                            |
| 0.309811359                            | 242.3698802                            | 0.031810544                                  | 0.98270932                     | 73.45426905                            |
| 0.232282424                            | 27.5596569                             | 0.009040879                                  | 0.973614209                    | 97.45589122                            |
| 0.167581042                            | 75.23920496                            | 0.026385105                                  | 0.949055804                    | 118.9608593                            |
| 0.183277467                            | -483.983183                            | 0.018794237                                  | 0.960789346                    | 113.4159476                            |
| 0.229853752                            | -38.30643499                           | 0.011383442                                  | 0.975874804                    | 89.81076016                            |
| 0.265804756                            | 482.9093054                            | 0.014167324                                  | 0.976566339                    | 90.12687562                            |
| 0.29753128                             | 44.58150466                            | 0.018363516                                  | 0.978514754                    | 59.24530484                            |
| 0.246768065                            | -260.1883336                           | 0.019339704                                  | 0.976862429                    | 77.7979556                             |
| 0.232809789                            | 19.87459118                            | 0.015249273                                  | 0.972179981                    | 86.62318816                            |
| 0.292059227                            | 41.94647902                            | 0.019970046                                  | 0.982645561                    | 65.81349472                            |
| 0.198154901                            | 204.2775993                            | 0.011165545                                  | 0.97409293                     | 114.0522418                            |
| 0.211699331                            | -135.7310073                           | 0.010984726                                  | 0.970161357                    | 90.76595876                            |
| 0.198371015                            | 128.4057866                            | 0.010218459                                  | 0.971291918                    | 121.1930251                            |
| 0.229436151                            | 31.67095423                            | 0.012709413                                  | 0.977311949                    | 73.3915268                             |
| 0.344651481                            | 149.0687961                            | 0.0298259                                    | 0.976592812                    | 37.15288407                            |
| 0.238863641                            | 69.29190755                            | 0.010131788                                  | 0.97684822                     | 77.78145655                            |
| 0.22308624                             | 67.14114792                            | 0.012668586                                  | 0.965439058                    | 85.81613878                            |
| 0.177889287                            | -475.1442062                           | 0.034438959                                  | 0.955422338                    | 103.7484853                            |
| 0.194732277                            | -428.6748809                           | 0.017112719                                  | 0.97363893                     | 138.7444242                            |
| 0.295096029                            | 202.0440454                            | 0.026346313                                  | 0.981971096                    | 66.63506796                            |
| 0.227542586                            | -20.08302069                           | 0.016148421                                  | 0.950955405                    | 91.7744338                             |
| 0.26069612                             | 232.9769418                            | 0.01905586                                   | 0.980658638                    | 79.21032356                            |
| 0.267795382                            | -87.24312973                           | 0.021560158                                  | 0.971189441                    | 63.02492109                            |
| 0.397223641                            | 194.2797629                            | 0.066267602                                  | 0.981189257                    | 59.93588167                            |
| 0.182058803                            | 15.35310302                            | 0.009442284                                  | 0.967382356                    | 117.3953935                            |
| 0.171229058                            | 1.659494819                            | 0.007332455                                  | 0.965333625                    | 117.5648545                            |
| 0.207466241                            | -450.5581279                           | 0.014488266                                  | 0.971507375                    | 100.0038327                            |
| 0.253957524                            | 230.5001989                            | 0.01593415                                   | 0.973842098                    | 82.98685532                            |
| 0.280010958                            | -4.726015377                           | 0.015569195                                  | 0.974979501                    | 52.99767025                            |
| 0.233130682                            | 467.5138036                            | 0.015771114                                  | 0.971878361                    | 97.81390175                            |
| 0.254233437                            | 407.7476755                            | 0.015051409                                  | 0.983333829                    | 97.95213237                            |
| 0.361324365                            | 118.4910498                            | 0.04196891                                   | 0.98605615                     | 43.94852789                            |
| 0.390745185                            | 131.7250078                            | 0.053610546                                  | 0.983437974                    | 43.45363487                            |
| 0.194306597                            | -126.6223675                           | 0.017552862                                  | 0.959299732                    | 93.54103803                            |
| 0.242078707                            | 364.3808433                            | 0.015699422                                  | 0.978018257                    | 88.12694079                            |
| 0.195375318                            | -496.2578099                           | 0.020164622                                  | 0.968158856                    | 106.0187383                            |
| 0.240416214                            | 298.8604169                            | 0.01073133                                   | 0.970536069                    | 112.0233228                            |
| 0.204784187                            | -94.1178486                            | 0.012914553                                  | 0.963672409                    | 96.75218227                            |
| 0.235895487                            | 339.9023185                            | 0.011251346                                  | 0.9724675                      | 91.00877488                            |
| 0.243639747                            | 288.2481364                            | 0.011868766                                  | 0.975937271                    | 92.53017312                            |
| 0.215842815                            | 248.0528939                            | 0.010906747                                  | 0.970545526                    | 104.7111724                            |
| 0.31926942                             | 275.5423623                            | 0.026957313                                  | 0.980351044                    | 62.90012774                            |
| 0.340799089                            | 136.8771826                            | 0.028441416                                  | 0.984140597                    | 51.93778728                            |
| 0.346953961                            | 234.101713                             | 0.038600502                                  | 0.986633255                    | 56.09563462                            |
| 0.180139486                            | 31.1829552                             | 0.00861512                                   | 0.972180397                    | 118.9656601                            |
| 0.221013935                            | 93.37353673                            | 0.011465033                                  | 0.975528217                    | 81.08190704                            |
| 0.211354959                            | 573.0800125                            | 0.016177441                                  | 0.962387456                    | 108.8458319                            |
| 0.209881978                            | 111.1989043                            | 0.010742621                                  | 0.968207631                    | 93.93655583                            |
| 0.248964163                            | 169.6013632                            | 0.013947213                                  | 0.977424295                    | 74.7626564                             |
| 0.163650177                            | 133.9075024                            | 0.011622404                                  | 0.961428485                    | 137.9295569                            |
| 0.177664809                            | -74.29962891                           | 0.008325334                                  | 0.971783464                    | 116.3946268                            |
| 0.244992433                            | 97.04134507                            | 0.0172132                                    | 0.977167426                    | 89.2648536                             |
| 0.196958102                            | -420.5969964                           | 0.031696687                                  | 0.959376432                    | 87.41246548                            |
| 0.272027014                            | 197.0989261                            | 0.013504162                                  | 0.974785909                    | 65.92576428                            |
| 0.329065397                            | 217.2202619                            | 0.030471948                                  | 0.985205105                    | 53.48115483                            |
| 0.207336807                            | 478.3490015                            | 0.012116275                                  | 0.968590668                    | 111.5687729                            |
| 0.17175857                             | -428.9388993                           | 0.008414009                                  | 0.966876166                    | 137.3051646                            |
| 0.269621941                            | 64.49557551                            | 0.031063631                                  | 0.967470455                    | 47.15274318                            |
| 0.18590547                             | -1.984361759                           | 0.026487511                                  | 0.957078614                    | 77.42514356                            |
| 0.28949629                             | 157.0925755                            | 0.03195139                                   | 0.98222501                     | 80.10245732                            |
| 0.192927343                            | 579.3858157                            | 0.012048755                                  | 0.964867022                    | 115.3534634                            |
| 0.321767742                            | 118.3930117                            | 0.050250438                                  | 0.974626663                    | 54.71421813                            |
| 0.308221778                            | 141.9687411                            | 0.032593546                                  | 0.979601909                    | 60.14016377                            |
| 0.321838359                            | 99.62350276                            | 0.021929957                                  | 0.980231135                    | 55.25962127                            |
| 0.145595054                            | -25.32768434                           | 0.013886272                                  | 0.953165387                    | 210.6327956                            |
| 0.24743162                             | -68.99615048                           | 0.01493088                                   | 0.975377162                    | 78.29235266                            |
| 0.166295152                            | -125.0347784                           | 0.021737747                                  | 0.941077808                    | 99.43765894                            |
| 0.263185387                            | -133.1460996                           | 0.021989508                                  | 0.973415426                    | 72.69938398                            |
| 0.238930117                            | 431.2568663                            | 0.016601351                                  | 0.980871042                    | 95.69136132                            |

| log.sigma.3.5.mm.3D_glc_m_Contrast | log.sigma.3.5.mm.3D_glc_m_DifferenceEntropy | log.sigma.3.5.mm.3D_glc_m_InverseVariance | log.sigma.3.5.mm.3D_glc_m_Entropy | log.sigma.3.5.mm.3D_glc_m_Dissimilarity |
|------------------------------------|---------------------------------------------|-------------------------------------------|-----------------------------------|-----------------------------------------|
| 30.95344204                        | 3.488870824                                 | 0.221550551                               | 8.210981081                       | 4.361945185                             |
| 21.44057492                        | 3.243309175                                 | 0.30198631                                | 7.847156735                       | 3.284039871                             |
| 23.60709377                        | 3.294940852                                 | 0.25363814                                | 7.650776583                       | 3.801423491                             |
| 31.75285385                        | 3.548816696                                 | 0.224680598                               | 8.559622836                       | 4.362134104                             |
| 33.57991706                        | 3.521259268                                 | 0.208660772                               | 7.94412572                        | 4.517720469                             |
| 19.53735421                        | 3.2030821                                   | 0.244716185                               | 7.705516175                       | 3.516066904                             |
| 12.91371002                        | 2.85508915                                  | 0.326188867                               | 6.895588511                       | 2.72722318                              |
| 43.94606695                        | 3.752712021                                 | 0.18063832                                | 8.716857431                       | 5.305210757                             |
| 35.66738772                        | 3.64115141                                  | 0.211997365                               | 8.751751844                       | 4.63715175                              |
| 19.30854591                        | 3.223763589                                 | 0.289093041                               | 7.930979593                       | 3.270491451                             |
| 24.30176809                        | 3.320969037                                 | 0.236260781                               | 7.886291481                       | 3.939976766                             |
| 24.13181727                        | 3.34731215                                  | 0.252356426                               | 8.216341499                       | 3.76896123                              |
| 18.04096524                        | 3.162714896                                 | 0.279832076                               | 7.965367731                       | 3.234586123                             |
| 22.41410458                        | 3.304546014                                 | 0.241012394                               | 8.099554255                       | 3.738753008                             |
| 23.48701043                        | 3.340874494                                 | 0.239775126                               | 8.035407197                       | 3.775508107                             |
| 11.64333409                        | 2.75709186                                  | 0.34861207                                | 6.791598466                       | 2.120172302                             |
| 32.59325331                        | 3.480664118                                 | 0.208368888                               | 8.27234165                        | 4.525590531                             |
| 26.30364255                        | 3.40733222                                  | 0.257005042                               | 8.334579754                       | 3.868281474                             |
| 40.64586278                        | 3.656758018                                 | 0.187891881                               | 8.399319032                       | 5.058103002                             |
| 13.54011744                        | 2.99110105                                  | 0.317867955                               | 7.426688392                       | 2.658057667                             |
| 13.75250286                        | 3.016670252                                 | 0.320783134                               | 7.45630012                        | 2.715745165                             |
| 25.10692136                        | 3.391492962                                 | 0.234585063                               | 8.254165905                       | 3.892339578                             |
| 20.32641479                        | 3.258065089                                 | 0.271942179                               | 8.014536936                       | 3.418962168                             |
| 28.57893058                        | 3.450915843                                 | 0.218690479                               | 7.947266063                       | 4.180485811                             |
| 16.35384535                        | 3.118150477                                 | 0.292419651                               | 7.442058867                       | 3.061299556                             |
| 35.99708814                        | 3.615395387                                 | 0.218616154                               | 8.211257786                       | 4.585447846                             |
| 12.77624353                        | 2.94375033                                  | 0.32766652                                | 7.206549537                       | 2.479373238                             |
| 20.25580844                        | 3.251025988                                 | 0.275500164                               | 7.821744214                       | 3.410468268                             |
| 32.9028054                         | 3.5357064                                   | 0.215538454                               | 8.442043722                       | 4.516557653                             |
| 20.28327459                        | 3.21804277                                  | 0.307043734                               | 7.820875349                       | 3.171910637                             |
| 17.3012476                         | 3.163721709                                 | 0.289815524                               | 7.717462929                       | 3.137785869                             |
| 18.90225485                        | 3.206162969                                 | 0.280437707                               | 8.025260547                       | 3.20622815                              |
| 27.60169829                        | 3.456748102                                 | 0.239741328                               | 8.479242706                       | 4.051873899                             |
| 46.05037                           | 3.622264594                                 | 0.166442352                               | 6.582989861                       | 5.432545695                             |
| 39.55198822                        | 3.617807918                                 | 0.189556508                               | 7.829226202                       | 4.981094941                             |
| 26.58679469                        | 3.427961035                                 | 0.23502548                                | 8.355449844                       | 4.020470161                             |
| 26.08928453                        | 3.414850648                                 | 0.262898764                               | 8.231765733                       | 3.808744154                             |
| 15.61793105                        | 3.098420626                                 | 0.293668286                               | 7.81425691                        | 3.013991578                             |
| 23.93092636                        | 3.292864501                                 | 0.249088431                               | 7.890796846                       | 3.778783265                             |
| 27.41515284                        | 3.445673795                                 | 0.239812512                               | 8.20222862                        | 4.03751241                              |
| 20.3445398                         | 3.240039068                                 | 0.289255114                               | 7.889300089                       | 3.306351189                             |
| 34.30419258                        | 3.58984132                                  | 0.206137061                               | 8.446881047                       | 4.61477508                              |
| 29.30210367                        | 3.453042768                                 | 0.222550841                               | 8.322715703                       | 4.272586298                             |
| 36.30137925                        | 3.626731618                                 | 0.201472073                               | 8.569659456                       | 4.714568087                             |
| 24.95988136                        | 3.39061744                                  | 0.233325589                               | 8.222086114                       | 3.91226986                              |
| 12.37453172                        | 2.914613338                                 | 0.334529932                               | 7.116393416                       | 2.60116472                              |
| 24.01200869                        | 3.381584452                                 | 0.244663704                               | 8.34793781                        | 3.794272431                             |
| 27.8269726                         | 3.435559298                                 | 0.232506805                               | 8.000955793                       | 4.151683381                             |
| 48.83089643                        | 3.689507172                                 | 0.184769356                               | 6.876013146                       | 5.485857303                             |
| 41.30037153                        | 3.689285314                                 | 0.20404905                                | 8.157773318                       | 5.004477617                             |
| 18.47919675                        | 3.211054242                                 | 0.276874622                               | 7.966283812                       | 3.230119474                             |
| 29.74437818                        | 3.458917554                                 | 0.220746097                               | 7.929221066                       | 4.27835751                              |
| 26.74852611                        | 3.43381711                                  | 0.249086637                               | 8.330644532                       | 3.905015925                             |
| 18.18526615                        | 3.17620208                                  | 0.265930521                               | 7.649092492                       | 3.307389968                             |
| 17.32436205                        | 3.052775584                                 | 0.324622229                               | 7.5022084                         | 2.786793095                             |
| 41.46913182                        | 3.709857483                                 | 0.187254009                               | 8.591198885                       | 5.085220665                             |
| 47.07976602                        | 3.731384156                                 | 0.178424089                               | 8.846867303                       | 5.418871969                             |
| 36.12327826                        | 3.611905441                                 | 0.209575706                               | 8.455093048                       | 4.650241316                             |
| 22.36476631                        | 3.307621047                                 | 0.262950272                               | 8.015876502                       | 3.625592143                             |
| 14.28726454                        | 2.984560943                                 | 0.277576049                               | 7.492014443                       | 2.974681171                             |
| 29.67183181                        | 3.52159652                                  | 0.232330147                               | 8.381570034                       | 4.178988131                             |
| 28.39413282                        | 3.484730893                                 | 0.249386355                               | 8.534411331                       | 3.993311543                             |
| 13.25406437                        | 2.959395826                                 | 0.325202906                               | 7.330117102                       | 2.64025016                              |
| 14.00255955                        | 2.950199093                                 | 0.340770966                               | 7.193783376                       | 2.576763923                             |
| 30.96939547                        | 3.454157848                                 | 0.198474592                               | 7.455087068                       | 4.432376813                             |
| 30.78226455                        | 3.519483831                                 | 0.241478397                               | 8.329092508                       | 4.180664344                             |
| 38.22321948                        | 3.610590736                                 | 0.199515161                               | 7.917362594                       | 4.840645529                             |
| 31.22273725                        | 3.545912214                                 | 0.237698393                               | 8.623214934                       | 4.241597173                             |
| 29.25832147                        | 3.453527577                                 | 0.21301597                                | 7.92660477                        | 4.319961385                             |
| 28.961222                          | 3.495811715                                 | 0.237212222                               | 8.375226771                       | 4.12117111                              |
| 30.18581939                        | 3.478575997                                 | 0.241138516                               | 8.390824403                       | 4.159498173                             |
| 30.98445715                        | 3.526458487                                 | 0.217169121                               | 8.376148413                       | 4.352778774                             |
| 19.14419735                        | 3.209278922                                 | 0.294884148                               | 7.866135338                       | 3.168792255                             |
| 16.23077421                        | 3.098399414                                 | 0.312629066                               | 7.639271157                       | 2.905920704                             |
| 17.43108746                        | 3.136661933                                 | 0.317277685                               | 7.704055981                       | 2.9343827                               |
| 43.5951461                         | 3.704681997                                 | 0.187833578                               | 8.637696864                       | 5.211763057                             |
| 28.7924972                         | 3.45399377                                  | 0.228829728                               | 8.186146919                       | 4.175091387                             |
| 32.99130822                        | 3.550750887                                 | 0.216223227                               | 8.06068188                        | 4.493616076                             |
| 33.59776945                        | 3.549550727                                 | 0.21352686                                | 8.447130454                       | 4.529698611                             |
| 23.25422163                        | 3.35516034                                  | 0.250297058                               | 8.178922667                       | 3.738689808                             |
| 52.28698505                        | 3.806352066                                 | 0.159029984                               | 8.351627335                       | 5.80629199                              |
| 41.87761481                        | 3.728830809                                 | 0.18644059                                | 8.709310225                       | 5.143681532                             |
| 30.18468247                        | 3.513915706                                 | 0.241410168                               | 8.462169624                       | 4.159767089                             |
| 36.05275141                        | 3.493353733                                 | 0.212606941                               | 8.685736458                       | 4.716477207                             |
| 20.09595292                        | 3.239084329                                 | 0.270507849                               | 8.004259271                       | 3.406748994                             |
| 16.11908574                        | 3.100684779                                 | 0.314231614                               | 7.678602271                       | 2.914742173                             |
| 31.03034544                        | 3.522927105                                 | 0.214155172                               | 8.281211445                       | 4.390889662                             |
| 47.0304827                         | 3.790902058                                 | 0.177150153                               | 8.867358028                       | 5.46302538                              |
| 17.35855377                        | 3.012069401                                 | 0.271099244                               | 6.779603759                       | 3.252277734                             |
| 32.77324857                        | 3.33090648                                  | 0.210693716                               | 6.519719606                       | 4.579000956                             |
| 26.05710084                        | 3.407043031                                 | 0.267530428                               | 8.230040219                       | 3.726206147                             |
| 40.36871101                        | 3.702952326                                 | 0.199521617                               | 8.25236663                        | 4.930686222                             |
| 17.4401443                         | 3.164367485                                 | 0.288415248                               | 7.605616871                       | 3.068575325                             |
| 18.57430254                        | 3.203670989                                 | 0.282887492                               | 7.891650217                       | 3.174877207                             |
| 15.55536617                        | 3.087585623                                 | 0.310501733                               | 7.726354709                       | 2.909848621                             |
| 68.59714412                        | 3.904502919                                 | 0.150155136                               | 7.868795974                       | 6.657606023                             |
| 24.13892979                        | 3.365536548                                 | 0.25719549                                | 8.150343632                       | 3.75864525                              |
| 43.06239396                        | 3.565897487                                 | 0.163049225                               | 6.840894168                       | 5.311152453                             |
| 16.59787391                        | 3.0914456                                   | 0.265244997                               | 7.502414702                       | 3.213241375                             |
| 34.73729132                        | 3.581448046                                 | 0.240590047                               | 8.136060856                       | 4.334432078                             |

| log.sigma.3.5.mm.3D_glmc_DifferenceVariance | log.sigma.3.5.mm.3D_glmc_ldn | log.sigma.3.5.mm.3D_glmc_ldm | log.sigma.3.5.mm.3D_glmc_Correlation | log.sigma.3.5.mm.3D_glmc_Autocorrelation |
|---------------------------------------------|------------------------------|------------------------------|--------------------------------------|------------------------------------------|
| 10.86585254                                 | 0.893058825                  | 0.21468837                   | 0.540668552                          | 272.6991254                              |
| 10.09807818                                 | 0.913962189                  | 0.327063111                  | 0.522001574                          | 196.2780251                              |
| 8.571562256                                 | 0.87274635                   | 0.23183576                   | 0.497994912                          | 110.1532574                              |
| 11.82990682                                 | 0.8960052                    | 0.220645005                  | 0.490194317                          | 310.7030515                              |
| 12.0767393                                  | 0.881204195                  | 0.204390403                  | 0.618390275                          | 296.3775067                              |
| 6.782616608                                 | 0.880016367                  | 0.242465577                  | 0.504146859                          | 137.1350375                              |
| 4.751827427                                 | 0.892907727                  | 0.312939967                  | 0.538083427                          | 103.2965942                              |
| 14.9235662                                  | 0.884509087                  | 0.170434094                  | 0.503918054                          | 302.1752153                              |
| 13.48705487                                 | 0.892981423                  | 0.207887515                  | 0.538595896                          | 337.5746096                              |
| 8.258977784                                 | 0.908107737                  | 0.289197318                  | 0.546488337                          | 185.3026765                              |
| 7.93036295                                  | 0.872490196                  | 0.224391771                  | 0.478179522                          | 207.789107                               |
| 9.121869303                                 | 0.898372086                  | 0.24644651                   | 0.575765058                          | 195.3974655                              |
| 7.098152619                                 | 0.902826347                  | 0.27715367                   | 0.621349452                          | 147.4202095                              |
| 8.000091582                                 | 0.885738453                  | 0.234134429                  | 0.581154955                          | 162.3961089                              |
| 8.676713101                                 | 0.885244653                  | 0.23902513                   | 0.531365761                          | 189.0736432                              |
| 6.937194904                                 | 0.945845128                  | 0.476490052                  | 0.565634836                          | 194.6487962                              |
| 10.54602753                                 | 0.877204741                  | 0.1984461                    | 0.528924099                          | 217.0350292                              |
| 10.54364353                                 | 0.893824433                  | 0.256496596                  | 0.579131991                          | 154.4000836                              |
| 13.35804611                                 | 0.872435385                  | 0.183891223                  | 0.550156934                          | 254.8506171                              |
| 6.225173933                                 | 0.910868039                  | 0.35985415                   | 0.557778169                          | 102.9859309                              |
| 6.174323955                                 | 0.928238803                  | 0.341738675                  | 0.505689483                          | 228.4985351                              |
| 9.385551332                                 | 0.903039627                  | 0.229387546                  | 0.561268674                          | 169.029804                               |
| 8.208558865                                 | 0.906736568                  | 0.272975448                  | 0.554124118                          | 188.7621099                              |
| 10.45933249                                 | 0.888496405                  | 0.214863034                  | 0.554601884                          | 369.5918143                              |
| 6.690065928                                 | 0.89816023                   | 0.295594386                  | 0.444920124                          | 106.7298818                              |
| 14.06700169                                 | 0.88366639                   | 0.217249436                  | 0.450544134                          | 186.7021724                              |
| 6.44537152                                  | 0.932786792                  | 0.392420865                  | 0.550457784                          | 266.951852                               |
| 8.177190813                                 | 0.904333049                  | 0.274543194                  | 0.542632053                          | 157.3531955                              |
| 11.4493651                                  | 0.87775028                   | 0.209063317                  | 0.54958098                           | 258.8501877                              |
| 9.839124226                                 | 0.926372047                  | 0.337625575                  | 0.524945454                          | 216.9929698                              |
| 7.123061724                                 | 0.911010948                  | 0.295466812                  | 0.52125585                           | 195.3954332                              |
| 8.074291912                                 | 0.914762428                  | 0.309811359                  | 0.591594726                          | 179.0096049                              |
| 10.58932124                                 | 0.891879877                  | 0.23282424                   | 0.560785494                          | 221.5886142                              |
| 15.30657986                                 | 0.849115699                  | 0.167581042                  | 0.444941348                          | 245.0608697                              |
| 13.57977371                                 | 0.86725679                   | 0.183277467                  | 0.489398213                          | 299.8226662                              |
| 9.784779676                                 | 0.895080859                  | 0.229853752                  | 0.545984833                          | 257.1278565                              |
| 11.089068                                   | 0.901053565                  | 0.265804756                  | 0.551817623                          | 144.4281756                              |
| 6.272479053                                 | 0.902578013                  | 0.29753128                   | 0.582858169                          | 162.0700591                              |
| 8.486884786                                 | 0.897991678                  | 0.246768065                  | 0.533774317                          | 253.794092                               |
| 10.57441436                                 | 0.889204753                  | 0.232809789                  | 0.521513754                          | 179.6214656                              |
| 9.037373746                                 | 0.91481294                   | 0.292059227                  | 0.531979677                          | 224.5597545                              |
| 12.21648097                                 | 0.890375701                  | 0.198154901                  | 0.540369935                          | 268.7407726                              |
| 9.836334404                                 | 0.883069589                  | 0.211699331                  | 0.515856444                          | 233.0778688                              |
| 12.96031034                                 | 0.885893401                  | 0.198371015                  | 0.543215248                          | 255.9479685                              |
| 9.136823137                                 | 0.89729317                   | 0.229436151                  | 0.49593996                           | 293.0397342                              |
| 5.302311206                                 | 0.901824465                  | 0.344651481                  | 0.499533678                          | 171.0562343                              |
| 9.198553482                                 | 0.897517839                  | 0.238863641                  | 0.530292473                          | 230.4387615                              |
| 9.884223931                                 | 0.87562947                   | 0.22308624                   | 0.510915096                          | 146.0858627                              |
| 17.19673609                                 | 0.860791878                  | 0.177889287                  | 0.370002856                          | 336.0054806                              |
| 15.13285485                                 | 0.89088707                   | 0.194732277                  | 0.5456073                            | 371.899892                               |
| 7.696786796                                 | 0.911401297                  | 0.295096029                  | 0.566633938                          | 177.1992938                              |
| 10.2519592                                  | 0.855402072                  | 0.227542586                  | 0.511147183                          | 159.566937                               |
| 10.77737011                                 | 0.908220168                  | 0.26069612                   | 0.498394293                          | 260.5185727                              |
| 6.922322933                                 | 0.886815698                  | 0.267795382                  | 0.554693314                          | 153.5143368                              |
| 9.066669939                                 | 0.920004377                  | 0.397223641                  | 0.556396813                          | 136.734196                               |
| 14.65010598                                 | 0.878226428                  | 0.182058803                  | 0.483326612                          | 233.8462114                              |
| 14.84067942                                 | 0.874689313                  | 0.171229058                  | 0.438321014                          | 319.6316824                              |
| 13.24739663                                 | 0.887584988                  | 0.207466241                  | 0.477297708                          | 321.088076                               |
| 8.852392817                                 | 0.892902654                  | 0.253957524                  | 0.57518757                           | 190.1481259                              |
| 4.987954557                                 | 0.89217042                   | 0.280010958                  | 0.576101449                          | 131.9532364                              |
| 11.70019299                                 | 0.889236076                  | 0.233130682                  | 0.535896168                          | 155.3004404                              |
| 11.83211323                                 | 0.914627917                  | 0.254233437                  | 0.55566456                           | 262.963028                               |
| 5.898425304                                 | 0.92412755                   | 0.361324365                  | 0.539123455                          | 171.6955434                              |
| 7.042742258                                 | 0.922222627                  | 0.390745185                  | 0.511270625                          | 222.4563729                              |
| 10.69335874                                 | 0.864085413                  | 0.194306597                  | 0.505363981                          | 232.2970157                              |
| 12.54799377                                 | 0.902762714                  | 0.242078707                  | 0.487136777                          | 260.0644524                              |
| 13.43116845                                 | 0.880470018                  | 0.195375318                  | 0.473537327                          | 270.2752321                              |
| 12.62224983                                 | 0.888298229                  | 0.240416214                  | 0.563834837                          | 189.2495447                              |
| 9.89983488                                  | 0.870881501                  | 0.204784187                  | 0.537643452                          | 172.7426638                              |
| 11.38226477                                 | 0.890591777                  | 0.235895487                  | 0.5202468                            | 183.5861759                              |
| 11.42585564                                 | 0.898290524                  | 0.243639747                  | 0.514934176                          | 230.5424888                              |
| 11.26321349                                 | 0.884760127                  | 0.215842815                  | 0.54504027                           | 170.2297086                              |
| 8.649249251                                 | 0.911272967                  | 0.31926942                   | 0.536658496                          | 148.3998393                              |
| 7.486991986                                 | 0.919981924                  | 0.340799089                  | 0.525908089                          | 244.4418812                              |
| 8.541367245                                 | 0.92776978                   | 0.346953961                  | 0.529936204                          | 243.3925025                              |
| 14.38768346                                 | 0.886661137                  | 0.180139486                  | 0.468137971                          | 313.3418843                              |
| 10.37008593                                 | 0.894494743                  | 0.221013935                  | 0.480941571                          | 208.0047999                              |
| 12.00757142                                 | 0.871455778                  | 0.211354959                  | 0.535769835                          | 129.27623                                |
| 11.8200478                                  | 0.880970368                  | 0.209881978                  | 0.477934183                          | 254.2824542                              |
| 8.817617449                                 | 0.898821066                  | 0.248964163                  | 0.527465635                          | 210.1091506                              |
| 16.51772898                                 | 0.86683768                   | 0.163650177                  | 0.455616379                          | 283.2459634                              |
| 14.48104013                                 | 0.885136166                  | 0.177664809                  | 0.475778098                          | 313.8572434                              |
| 12.07838568                                 | 0.900747506                  | 0.244992433                  | 0.499370279                          | 317.9466196                              |
| 12.85369398                                 | 0.866063078                  | 0.196958102                  | 0.424840957                          | 306.7592091                              |
| 7.870362087                                 | 0.895442078                  | 0.272027014                  | 0.531563833                          | 140.1541254                              |
| 7.300985577                                 | 0.921757572                  | 0.329065397                  | 0.539596276                          | 219.4036831                              |
| 11.14720064                                 | 0.880436519                  | 0.207336807                  | 0.567011564                          | 171.0219225                              |
| 15.7934944                                  | 0.87646448                   | 0.17175857                   | 0.496839979                          | 376.6790645                              |
| 5.587875575                                 | 0.879874499                  | 0.269621941                  | 0.452822212                          | 173.1087139                              |
| 10.30898142                                 | 0.860290525                  | 0.18590547                   | 0.419105391                          | 185.6874685                              |
| 11.45394574                                 | 0.91463892                   | 0.28949629                   | 0.511898874                          | 270.5793526                              |
| 15.22113495                                 | 0.875845566                  | 0.192927343                  | 0.4846035                            | 137.990959                               |
| 7.740564047                                 | 0.898951588                  | 0.321767742                  | 0.516385116                          | 132.5016952                              |
| 8.051460971                                 | 0.908076388                  | 0.308221778                  | 0.528759776                          | 166.5267975                              |
| 6.830456114                                 | 0.90925136                   | 0.321838359                  | 0.559907052                          | 151.1659979                              |
| 19.99541511                                 | 0.854660168                  | 0.145595054                  | 0.512429141                          | 360.4385545                              |
| 9.573305473                                 | 0.895843415                  | 0.24743162                   | 0.532103137                          | 306.0045397                              |
| 13.0578812                                  | 0.837389941                  | 0.166295152                  | 0.407461648                          | 192.4870287                              |
| 5.944581673                                 | 0.888923652                  | 0.263185387                  | 0.63010475                           | 173.8731189                              |
| 15.24711818                                 | 0.910760113                  | 0.238930117                  | 0.4729649                            | 313.8970268                              |

| log.sigma.3.5.mm.3D_glcM_SumEntropy | log.sigma.3.5.mm.3D_glcM_AverageIntensity | log.sigma.3.5.mm.3D_glcM_Energy | log.sigma.3.5.mm.3D_glcM_SumSquares | log.sigma.3.5.mm.3D_glcM_ClusterProminence |
|-------------------------------------|-------------------------------------------|---------------------------------|-------------------------------------|--------------------------------------------|
| 5.275857186                         | 16.12726482                               | 0.004233569                     | 34.37496771                         | 30980.83345                                |
| 5.00202341                          | 13.68846795                               | 0.007948779                     | 23.22749129                         | 15151.28575                                |
| 4.953209985                         | 9.917690634                               | 0.006068011                     | 23.54476461                         | 13642.44454                                |
| 5.269224295                         | 17.42908076                               | 0.003433405                     | 31.10673111                         | 23477.38737                                |
| 5.381370094                         | 16.50691013                               | 0.005014936                     | 44.38765693                         | 51397.64731                                |
| 4.899197527                         | 11.28112473                               | 0.005569631                     | 19.61566745                         | 8104.62817                                 |
| 4.577714808                         | 9.791483102                               | 0.011183432                     | 13.84649877                         | 5932.474319                                |
| 5.482988578                         | 17.01182195                               | 0.002866221                     | 43.94951065                         | 47038.32436                                |
| 5.436761804                         | 18.00853075                               | 0.002996864                     | 38.64322077                         | 41469.38497                                |
| 5.005766791                         | 13.24952345                               | 0.006067632                     | 21.93240025                         | 13507.43542                                |
| 4.986880471                         | 14.02714015                               | 0.005164946                     | 23.13560098                         | 10694.56418                                |
| 5.216042989                         | 13.4856524                                | 0.004424966                     | 29.39583861                         | 22982.74895                                |
| 5.096531406                         | 11.52340225                               | 0.005313746                     | 24.26322315                         | 18346.27584                                |
| 5.153259949                         | 12.12491699                               | 0.004369881                     | 26.74142066                         | 16081.77787                                |
| 5.093551877                         | 13.31179463                               | 0.004893431                     | 25.55928644                         | 16108.33815                                |
| 4.518659247                         | 13.72791625                               | 0.030327725                     | 13.70484873                         | 8791.529736                                |
| 5.281242278                         | 14.20516913                               | 0.003862334                     | 35.42344126                         | 25756.76372                                |
| 5.263334639                         | 11.7370934                                | 0.004137101                     | 32.13471892                         | 28348.84623                                |
| 5.436966298                         | 15.37879166                               | 0.003618191                     | 46.17249583                         | 45597.15226                                |
| 4.768728931                         | 9.717924243                               | 0.009232524                     | 15.30899888                         | 7429.429969                                |
| 4.708448364                         | 14.97061598                               | 0.009026027                     | 14.45596963                         | 5854.640049                                |
| 5.198676627                         | 12.44749091                               | 0.00419548                      | 29.21075773                         | 24533.24365                                |
| 5.055479653                         | 13.35340635                               | 0.00564254                      | 23.48970837                         | 15495.85374                                |
| 5.181270518                         | 18.99174556                               | 0.005201605                     | 32.10667992                         | 29214.53441                                |
| 4.681117591                         | 10.00879799                               | 0.008098738                     | 14.72509647                         | 5527.147256                                |
| 5.205645475                         | 13.26950382                               | 0.004281768                     | 33.96085011                         | 25335.77088                                |
| 4.664679869                         | 16.17199287                               | 0.016207269                     | 14.66402239                         | 8110.291247                                |
| 4.980344259                         | 12.118934                                 | 0.006108062                     | 22.88766929                         | 13299.51336                                |
| 5.319953297                         | 15.60808003                               | 0.003630035                     | 37.4483173                          | 26197.79276                                |
| 4.978419992                         | 14.51392266                               | 0.008192984                     | 21.9486097                          | 14555.3702                                 |
| 4.85687921                          | 13.68395121                               | 0.007047869                     | 18.5597003                          | 10180.68167                                |
| 5.093576197                         | 12.9302491                                | 0.006104875                     | 23.86695762                         | 16211.88222                                |
| 5.299963221                         | 14.39898879                               | 0.003502574                     | 32.30663                            | 24011.00381                                |
| 4.830385677                         | 15.13019101                               | 0.011520212                     | 42.12679599                         | 32635.11989                                |
| 5.214863188                         | 16.97139699                               | 0.005469768                     | 39.37944914                         | 33660.20452                                |
| 5.221955574                         | 15.68517656                               | 0.003784671                     | 30.02718665                         | 18933.55143                                |
| 5.187110856                         | 11.4113635                                | 0.004748405                     | 30.13624399                         | 22936.24686                                |
| 4.944305407                         | 12.29639338                               | 0.005925688                     | 18.75221157                         | 9195.124395                                |
| 5.069168823                         | 15.57938081                               | 0.006006176                     | 26.02187801                         | 20682.2396                                 |
| 5.174202213                         | 12.88339331                               | 0.004353877                     | 29.08732212                         | 19730.15511                                |
| 5.017960271                         | 14.74699842                               | 0.006224124                     | 22.50539992                         | 13233.3196                                 |
| 5.361518539                         | 15.96893218                               | 0.003580808                     | 37.68722332                         | 35034.78916                                |
| 5.199658499                         | 14.84819532                               | 0.003819211                     | 30.8330077                          | 18357.46808                                |
| 5.424016691                         | 15.47782051                               | 0.003301334                     | 40.21574013                         | 39154.00666                                |
| 5.101071376                         | 16.90428031                               | 0.004345819                     | 25.27219754                         | 15261.34835                                |
| 4.545335979                         | 8.05320789                                | 0.010637507                     | 12.38185395                         | 4286.828401                                |
| 5.161425206                         | 14.83653517                               | 0.003973522                     | 26.34071657                         | 15836.11955                                |
| 5.111281493                         | 11.47734852                               | 0.004628877                     | 28.588874                           | 17111.56652                                |
| 4.908332199                         | 18.17205703                               | 0.010292505                     | 38.70215594                         | 34061.7448                                 |
| 5.416115666                         | 18.88614724                               | 0.004813347                     | 44.18462883                         | 61770.19701                                |
| 5.029247665                         | 12.89726896                               | 0.005790756                     | 21.86698551                         | 13509.28508                                |
| 5.09524659                          | 12.00092369                               | 0.005187855                     | 30.37970299                         | 15623.97735                                |
| 5.156638595                         | 15.9221938                                | 0.004430974                     | 27.15211229                         | 20868.78643                                |
| 4.939190518                         | 11.92825002                               | 0.006476118                     | 20.30254681                         | 10905.59179                                |
| 4.859007084                         | 11.24845199                               | 0.013830783                     | 19.63300872                         | 12483.65011                                |
| 5.393012664                         | 14.87826626                               | 0.003139222                     | 40.96361143                         | 35060.476                                  |
| 5.426532446                         | 17.71976305                               | 0.002679599                     | 41.55597907                         | 35229.42053                                |
| 5.271957426                         | 17.7075381                                | 0.004006654                     | 34.30774916                         | 30706.40818                                |
| 5.136973899                         | 13.26668746                               | 0.005047258                     | 26.93376917                         | 18704.38157                                |
| 4.835271365                         | 11.0569132                                | 0.00676631                      | 16.8212337                          | 6699.647713                                |
| 5.247334897                         | 11.82653279                               | 0.004094876                     | 32.793506                           | 25783.14721                                |
| 5.309435664                         | 15.89130694                               | 0.003770698                     | 32.08347972                         | 34076.72013                                |
| 4.698965529                         | 12.82746614                               | 0.011015088                     | 14.58744448                         | 7725.824527                                |
| 4.663333588                         | 14.69668299                               | 0.013280173                     | 14.72014873                         | 6788.94325                                 |
| 5.050454537                         | 14.76670051                               | 0.00654461                      | 31.78134529                         | 21879.84157                                |
| 5.199740352                         | 15.90306263                               | 0.004468343                     | 30.48003417                         | 26706.34044                                |
| 5.186389167                         | 16.08197407                               | 0.005418529                     | 36.7180389                          | 32235.50548                                |
| 5.380743725                         | 13.08037767                               | 0.003266042                     | 36.75187718                         | 31790.46995                                |
| 5.157240477                         | 12.50228553                               | 0.004864433                     | 31.83935374                         | 20307.77549                                |
| 5.228966969                         | 13.07340205                               | 0.003983036                     | 31.25008218                         | 22371.00515                                |
| 5.243765593                         | 14.85020786                               | 0.004075535                     | 31.79423309                         | 22076.55313                                |
| 5.299961088                         | 12.38809825                               | 0.003687967                     | 34.79072834                         | 26188.59617                                |
| 4.960750768                         | 11.76599246                               | 0.006775565                     | 21.11476146                         | 12976.13485                                |
| 4.845888271                         | 15.45456124                               | 0.007700188                     | 17.83686429                         | 8120.684837                                |
| 4.861311844                         | 15.43349943                               | 0.01011615                      | 19.06705025                         | 13450.21155                                |
| 5.395226551                         | 17.4675586                                | 0.003048036                     | 40.75730805                         | 37995.4668                                 |
| 5.132928355                         | 14.10331178                               | 0.00427782                      | 28.56805591                         | 17811.85625                                |
| 5.234495728                         | 10.56094315                               | 0.004708506                     | 36.5724609                          | 31633.36941                                |
| 5.260297785                         | 15.68394121                               | 0.00365971                      | 33.37064635                         | 22075.75053                                |
| 5.098677927                         | 14.14261749                               | 0.004529868                     | 25.44083174                         | 14002.79118                                |
| 5.449097099                         | 16.46519452                               | 0.003681136                     | 49.15029976                         | 46457.36301                                |
| 5.408403518                         | 17.47513042                               | 0.002915217                     | 39.47347754                         | 33479.57931                                |
| 5.242258421                         | 17.66407815                               | 0.004053057                     | 30.01439488                         | 23578.46295                                |
| 4.836968282                         | 17.27310096                               | 0.010202799                     | 31.84225297                         | 22324.85917                                |
| 5.012448471                         | 11.34984203                               | 0.00511783                      | 21.60862293                         | 12190.87433                                |
| 4.854270169                         | 14.57729285                               | 0.00821484                      | 18.1349045                          | 9987.792078                                |
| 5.299897722                         | 12.35490187                               | 0.003930335                     | 36.73130101                         | 30824.12151                                |
| 5.516914094                         | 19.10736873                               | 0.002506643                     | 45.57669404                         | 46205.39704                                |
| 4.558084044                         | 12.86906901                               | 0.011090614                     | 16.12782424                         | 5347.946111                                |
| 4.611065014                         | 13.20469283                               | 0.011995908                     | 27.54959803                         | 16509.99505                                |
| 5.138148712                         | 16.22458499                               | 0.006334499                     | 26.96789987                         | 23225.82279                                |
| 5.272540155                         | 11.06606466                               | 0.004078561                     | 40.96897434                         | 33782.19246                                |
| 4.846629976                         | 11.09854991                               | 0.008722969                     | 18.03899061                         | 8824.636038                                |
| 4.95663056                          | 12.52129215                               | 0.00686552                      | 20.0531618                          | 11915.4576                                 |
| 4.883172174                         | 11.88944521                               | 0.006897279                     | 17.79405214                         | 8797.964518                                |
| 5.567081704                         | 18.47574092                               | 0.004890767                     | 69.87748354                         | 97209.35712                                |
| 5.134699038                         | 17.21312477                               | 0.004767773                     | 26.27523185                         | 17773.00236                                |
| 4.799489096                         | 13.35209237                               | 0.009519108                     | 35.62501323                         | 24131.1995                                 |
| 4.994925593                         | 12.64150495                               | 0.007132164                     | 22.32431447                         | 13490.54671                                |
| 5.221593475                         | 17.55209541                               | 0.004934092                     | 33.84689507                         | 33382.39903                                |

| log.sigma.3.5.mm.3D_glc_m_SumAverage | log.sigma.3.5.mm.3D_glc_m_Lmc2 | log.sigma.3.5.mm.3D_glc_m_Lmc1 | log.sigma.3.5.mm.3D_glc_m_DifferenceAverage | log.sigma.3.5.mm.3D_glc_m_Id |
|--------------------------------------|--------------------------------|--------------------------------|---------------------------------------------|------------------------------|
| 31.91367185                          | 0.899207232                    | -0.185858308                   | 4.361945185                                 | 0.305489976                  |
| 27.17906741                          | 0.815860733                    | -0.13654783                    | 3.284039871                                 | 0.401046522                  |
| 19.83538127                          | 0.89127249                     | -0.190687355                   | 3.801423491                                 | 0.323285666                  |
| 34.39371538                          | 0.73716318                     | -0.095107282                   | 4.362134104                                 | 0.310353017                  |
| 32.82222519                          | 0.96754339                     | -0.296373574                   | 4.517720469                                 | 0.297183842                  |
| 22.56224946                          | 0.803533331                    | -0.131586511                   | 3.516066904                                 | 0.33584478                   |
| 19.5829662                           | 0.890051956                    | -0.212530898                   | 2.72722318                                  | 0.395229514                  |
| 33.47664696                          | 0.863200379                    | -0.148083879                   | 5.305210757                                 | 0.263419088                  |
| 35.60182225                          | 0.794738708                    | -0.113195571                   | 4.63715175                                  | 0.298325347                  |
| 26.36714483                          | 0.747599393                    | -0.105344728                   | 3.270491451                                 | 0.372603906                  |
| 28.05428031                          | 0.800427369                    | -0.126670476                   | 3.939976766                                 | 0.31629005                   |
| 26.77048711                          | 0.818658438                    | -0.134615749                   | 3.76896125                                  | 0.33557947                   |
| 23.01683884                          | 0.793081474                    | -0.129027258                   | 3.234586123                                 | 0.364285729                  |
| 24.24204398                          | 0.818254393                    | -0.134226775                   | 3.738753008                                 | 0.326756454                  |
| 26.52991184                          | 0.825996458                    | -0.137875047                   | 3.775508107                                 | 0.33048139                   |
| 27.36043451                          | 0.839473008                    | -0.17353272                    | 2.120172302                                 | 0.529492876                  |
| 28.20478619                          | 0.878238587                    | -0.169300622                   | 4.525590531                                 | 0.291854181                  |
| 23.34970418                          | 0.794655514                    | -0.122735378                   | 3.868281474                                 | 0.341901151                  |
| 30.35079186                          | 0.921570391                    | -0.206546971                   | 5.058103002                                 | 0.276339769                  |
| 19.43584849                          | 0.765761098                    | -0.121462733                   | 2.658057667                                 | 0.433221653                  |
| 29.76722933                          | 0.689842649                    | -0.091243485                   | 2.715745165                                 | 0.418158663                  |
| 24.74972099                          | 0.789088577                    | -0.11824629                    | 3.892339578                                 | 0.322164461                  |
| 26.55312073                          | 0.756153051                    | -0.107880344                   | 3.418962168                                 | 0.35918046                   |
| 37.53484571                          | 0.909761924                    | -0.201539283                   | 4.180485811                                 | 0.308512678                  |
| 20.01759597                          | 0.722328337                    | -0.100719003                   | 3.061299556                                 | 0.379885253                  |
| 26.24515871                          | 0.872193013                    | -0.162642324                   | 4.585447846                                 | 0.30632244                   |
| 32.19724716                          | 0.777506826                    | -0.128617713                   | 2.479373238                                 | 0.460561544                  |
| 24.11530017                          | 0.787763519                    | -0.123867987                   | 3.410468268                                 | 0.360168703                  |
| 30.91292126                          | 0.797868666                    | -0.122731111                   | 4.516557653                                 | 0.299652409                  |
| 28.70313448                          | 0.81784805                     | -0.137322393                   | 3.171910637                                 | 0.410300305                  |
| 27.2766753                           | 0.714622685                    | -0.097142727                   | 3.137785869                                 | 0.378826727                  |
| 25.71848634                          | 0.762888588                    | -0.116843807                   | 3.20622815                                  | 0.390068162                  |
| 28.57370505                          | 0.782797636                    | -0.112554452                   | 4.051873899                                 | 0.322012058                  |
| 30.1091736                           | 0.92741213                     | -0.487888065                   | 5.432545695                                 | 0.261077418                  |
| 33.54267387                          | 0.953762515                    | -0.26689737                    | 4.981094941                                 | 0.276647307                  |
| 31.06852981                          | 0.769666355                    | -0.109223073                   | 4.020470161                                 | 0.320568892                  |
| 22.66409805                          | 0.7656859                      | -0.109858831                   | 3.808744154                                 | 0.349760079                  |
| 24.58899594                          | 0.739487366                    | -0.10459257                    | 3.013991578                                 | 0.381727847                  |
| 31.00307363                          | 0.854522515                    | -0.167584516                   | 3.778783265                                 | 0.335711565                  |
| 25.67465312                          | 0.825282387                    | -0.13420922                    | 4.03751241                                  | 0.322552142                  |
| 29.20094826                          | 0.812168539                    | -0.133242431                   | 3.306351189                                 | 0.374678288                  |
| 31.54510003                          | 0.86088518                     | -0.151429376                   | 4.61477508                                  | 0.29100269                   |
| 29.50828661                          | 0.779509788                    | -0.113467785                   | 4.272586298                                 | 0.304037708                  |
| 30.63876127                          | 0.862861194                    | -0.1513967                     | 4.714568087                                 | 0.290730626                  |
| 33.5215412                           | 0.744590088                    | -0.100198582                   | 3.91226986                                  | 0.321669751                  |
| 16.10641958                          | 0.702972189                    | -0.10118584                    | 2.60116472                                  | 0.420751135                  |
| 29.46143865                          | 0.700375122                    | -0.084961709                   | 3.794272431                                 | 0.329932047                  |
| 22.93713236                          | 0.860468543                    | -0.1581647                     | 4.151683381                                 | 0.313358171                  |
| 35.89276454                          | 0.988688008                    | -0.43382461                    | 5.485857303                                 | 0.267928623                  |
| 37.27841213                          | 0.943884349                    | -0.239018086                   | 5.004477617                                 | 0.284585974                  |
| 25.70240202                          | 0.750920643                    | -0.107718013                   | 3.230119474                                 | 0.378459285                  |
| 24.00184737                          | 0.817325928                    | -0.137605487                   | 4.27835751                                  | 0.3163684                    |
| 31.45770861                          | 0.728280524                    | -0.096833878                   | 3.905015925                                 | 0.3452973                    |
| 23.85650004                          | 0.851237301                    | -0.158937679                   | 3.307389968                                 | 0.356958081                  |
| 22.45642162                          | 0.822672869                    | -0.14999775                    | 2.786793095                                 | 0.460384085                  |
| 29.31530216                          | 0.855649953                    | -0.145419197                   | 5.085220665                                 | 0.275006746                  |
| 34.75365185                          | 0.777792984                    | -0.109068904                   | 5.418871969                                 | 0.263738377                  |
| 34.93298425                          | 0.814828414                    | -0.127589386                   | 4.650241316                                 | 0.298214622                  |
| 26.45435561                          | 0.858373909                    | -0.158183223                   | 3.625592143                                 | 0.34237231                   |
| 22.11382641                          | 0.808767893                    | -0.142504212                   | 2.974681171                                 | 0.37018178                   |
| 23.51585204                          | 0.768523466                    | -0.106806759                   | 4.178988131                                 | 0.321748096                  |
| 31.34110576                          | 0.755160516                    | -0.102811533                   | 3.993311543                                 | 0.339397868                  |
| 25.61364898                          | 0.764305463                    | -0.124634518                   | 2.64025016                                  | 0.433687006                  |
| 29.33179711                          | 0.802144913                    | -0.142494551                   | 2.576763923                                 | 0.456544876                  |
| 29.43379728                          | 0.963839803                    | -0.301863437                   | 4.432376813                                 | 0.290847044                  |
| 31.35050806                          | 0.812855565                    | -0.12632091                    | 4.180664344                                 | 0.328517457                  |
| 31.82423851                          | 0.939549486                    | -0.242417373                   | 4.840645529                                 | 0.287140554                  |
| 26.00289089                          | 0.764850555                    | -0.104437096                   | 4.241597173                                 | 0.326490137                  |
| 24.96577696                          | 0.899547531                    | -0.191875385                   | 4.319961385                                 | 0.298568875                  |
| 25.92825306                          | 0.775388783                    | -0.109031344                   | 4.12117111                                  | 0.324332232                  |
| 29.32210636                          | 0.755071671                    | -0.10740335                    | 4.159498173                                 | 0.329745264                  |
| 24.63759813                          | 0.829279567                    | -0.134740879                   | 4.352778774                                 | 0.30698841                   |
| 23.44818319                          | 0.733039059                    | -0.104446979                   | 3.168792255                                 | 0.396919626                  |
| 30.69282237                          | 0.733986003                    | -0.105504152                   | 2.905920704                                 | 0.415490739                  |
| 30.57593235                          | 0.726050565                    | -0.101098044                   | 2.9343827                                   | 0.419907467                  |
| 34.3185336                           | 0.852463678                    | -0.145689429                   | 5.211763057                                 | 0.271915688                  |
| 27.921898                            | 0.813660102                    | -0.129518415                   | 4.175091387                                 | 0.312477698                  |
| 21.00196526                          | 0.888911459                    | -0.180189774                   | 4.493616076                                 | 0.301920729                  |
| 30.93091313                          | 0.768434028                    | -0.112136534                   | 4.529698611                                 | 0.300753492                  |
| 28.08751014                          | 0.721094814                    | -0.093851243                   | 3.738689808                                 | 0.33765727                   |
| 32.35626                             | 0.939773078                    | -0.229365364                   | 5.80629199                                  | 0.254796335                  |
| 34.36314793                          | 0.815138783                    | -0.121706501                   | 5.143681532                                 | 0.27054733                   |
| 34.82360136                          | 0.758364697                    | -0.104780912                   | 4.159767089                                 | 0.330766965                  |
| 34.28129692                          | 0.977346746                    | -0.366925489                   | 4.716477207                                 | 0.28819852                   |
| 22.68810073                          | 0.7142062                      | -0.098397553                   | 3.406748994                                 | 0.358718667                  |
| 28.98688025                          | 0.715596104                    | -0.099297122                   | 2.914742173                                 | 0.406266163                  |
| 24.56448319                          | 0.869149942                    | -0.160129823                   | 4.390889662                                 | 0.300056858                  |
| 37.63163523                          | 0.813028519                    | -0.118887752                   | 5.46302538                                  | 0.263330232                  |
| 25.73813801                          | 0.932222527                    | -0.266469914                   | 3.252277734                                 | 0.358493712                  |
| 26.40938566                          | 0.987841213                    | -0.448336768                   | 4.579000956                                 | 0.281059808                  |
| 32.0665577                           | 0.772915211                    | -0.113483996                   | 3.726206147                                 | 0.368935264                  |
| 21.83722619                          | 0.88242592                     | -0.168506111                   | 4.930686222                                 | 0.284609905                  |
| 22.19709981                          | 0.816265939                    | -0.140492753                   | 3.068575325                                 | 0.400510819                  |
| 24.99055443                          | 0.73038209                     | -0.102666467                   | 3.174877207                                 | 0.389207671                  |
| 23.7684853                           | 0.72962612                     | -0.102316308                   | 2.90984861                                  | 0.400887973                  |
| 36.04680423                          | 0.984917938                    | -0.365543436                   | 6.657606023                                 | 0.233613651                  |
| 34.20265153                          | 0.812539016                    | -0.128861102                   | 3.75864525                                  | 0.336064117                  |
| 26.70418475                          | 0.987226119                    | -0.425095313                   | 5.311152453                                 | 0.261160027                  |
| 25.2830099                           | 0.910798931                    | -0.214464325                   | 3.213241375                                 | 0.354588491                  |
| 34.56257619                          | 0.893608908                    | -0.180916904                   | 4.334432078                                 | 0.325544975                  |

| log.sigma.3.5.mm.3D_glcm_ClusterTendency | log.sigma.3.5.mm.3D_firstorder_InterquartileRange | log.sigma.3.5.mm.3D_firstorder_Skewness | log.sigma.3.5.mm.3D_firstorder_Uniformity |
|------------------------------------------|---------------------------------------------------|-----------------------------------------|-------------------------------------------|
| 103.1692039                              | 200.9754391                                       | 0.269930722                             | 0.048559895                               |
| 67.8245241                               | 137.4669685                                       | 0.415678114                             | 0.065663807                               |
| 70.57196469                              | 183.0674419                                       | 0.356099068                             | 0.058039032                               |
| 91.58651257                              | 207.641407                                        | -0.099376823                            | 0.048621354                               |
| 141.4625304                              | 216.9063034                                       | -0.117874509                            | 0.04632956                                |
| 58.92531559                              | 179.4241676                                       | -0.048063059                            | 0.061257858                               |
| 42.47228505                              | 111.2192039                                       | 0.183525959                             | 0.084855903                               |
| 131.7749704                              | 266.8599052                                       | 0.003748377                             | 0.04210541                                |
| 118.4158437                              | 225.4295006                                       | 0.168615949                             | 0.043736802                               |
| 65.28228555                              | 146.2717037                                       | 0.567020846                             | 0.065012684                               |
| 68.24063582                              | 196.8408432                                       | -0.370316231                            | 0.060379704                               |
| 89.00533234                              | 184.7789545                                       | 0.451989523                             | 0.053143343                               |
| 77.90508797                              | 177.7191563                                       | 0.450578456                             | 0.058600815                               |
| 84.2479606                               | 208.6576233                                       | -0.060550259                            | 0.053568057                               |
| 75.90820914                              | 166.8987865                                       | 0.180651533                             | 0.057464506                               |
| 41.63363289                              | 68.04923058                                       | 0.536238395                             | 0.121429647                               |
| 104.8737212                              | 220.0006256                                       | -0.145100204                            | 0.048628501                               |
| 98.61705903                              | 205.5984097                                       | 0.509048369                             | 0.050534145                               |
| 138.5878217                              | 238.3872719                                       | -0.201737057                            | 0.042837236                               |
| 47.69587808                              | 130.9765854                                       | 0.375771857                             | 0.07449971                                |
| 41.65285997                              | 115.9912727                                       | 0.461366239                             | 0.079363724                               |
| 88.59347567                              | 182.4758778                                       | 0.419044927                             | 0.05430503                                |
| 70.27385509                              | 155.6279144                                       | 0.512348979                             | 0.064161416                               |
| 98.01544894                              | 195.0110092                                       | -0.519571212                            | 0.053712596                               |
| 42.54654051                              | 133.8755751                                       | 0.537774206                             | 0.07535099                                |
| 93.88227936                              | 199.0491257                                       | 0.397902632                             | 0.050199736                               |
| 43.90939865                              | 96.58992243                                       | 0.612605352                             | 0.093006367                               |
| 68.02071919                              | 158.2692184                                       | 0.573833773                             | 0.063073627                               |
| 112.517196                               | 265.7579956                                       | -0.190131123                            | 0.048025745                               |
| 64.36931386                              | 140.8134301                                       | 0.356254209                             | 0.065247199                               |
| 54.84720245                              | 143.8532734                                       | 0.580528092                             | 0.069843869                               |
| 73.45426905                              | 163.0651627                                       | 0.479971389                             | 0.062635185                               |
| 97.45589122                              | 215.0603638                                       | 0.041308246                             | 0.048440041                               |
| 118.9608593                              | 218.6064224                                       | -0.10337624                             | 0.058431953                               |
| 113.4159476                              | 214.8351898                                       | -0.451818834                            | 0.05247496                                |
| 89.81076016                              | 227.5308437                                       | -0.045718963                            | 0.050238212                               |
| 90.12687562                              | 201.0722179                                       | 0.57865292                              | 0.055365789                               |
| 59.24530484                              | 160.0038834                                       | 0.10001477                              | 0.063442968                               |
| 77.7979556                               | 136.8543358                                       | -0.367922813                            | 0.064207394                               |
| 86.62318816                              | 193.6654358                                       | 0.014225659                             | 0.052819836                               |
| 65.81349472                              | 142.8762474                                       | 0.231501065                             | 0.062296449                               |
| 114.0522418                              | 231.974472                                        | 0.053013819                             | 0.046184303                               |
| 90.76595876                              | 225.0183487                                       | -0.216010818                            | 0.051518379                               |
| 121.1930251                              | 228.2451019                                       | 0.056210702                             | 0.044424033                               |
| 73.3915268                               | 183.7467651                                       | 0.05549243                              | 0.054851251                               |
| 37.15288407                              | 133.060873                                        | 0.617108201                             | 0.080585675                               |
| 77.78145655                              | 179.5296841                                       | 0.149841645                             | 0.054374486                               |
| 85.81613878                              | 221.4329815                                       | -0.07016174                             | 0.052973177                               |
| 103.7484853                              | 142.5974588                                       | -0.652632256                            | 0.065159278                               |
| 138.7444242                              | 160.8141937                                       | -0.445492381                            | 0.053896822                               |
| 66.63506796                              | 163.041626                                        | 0.388964319                             | 0.061798861                               |
| 91.7744338                               | 266.0951595                                       | -0.178181738                            | 0.057422627                               |
| 79.21032356                              | 184.3263397                                       | 0.358242166                             | 0.053738548                               |
| 63.02492109                              | 143.9046326                                       | -0.223841356                            | 0.065440147                               |
| 59.93588167                              | 105.6861382                                       | 0.482578147                             | 0.0860257                                 |
| 117.3953935                              | 232.1320877                                       | -0.007427973                            | 0.044391897                               |
| 117.5648545                              | 258.5569305                                       | -0.054482149                            | 0.041900721                               |
| 100.0038327                              | 187.0359955                                       | -0.510468234                            | 0.053639414                               |
| 82.98685532                              | 179.1786299                                       | 0.225822612                             | 0.055013915                               |
| 52.99767025                              | 161.8308144                                       | -0.072244887                            | 0.066191164                               |
| 97.81390175                              | 226.9367752                                       | 0.416676489                             | 0.051250055                               |
| 97.95213237                              | 197.5645981                                       | 0.406337152                             | 0.050597758                               |
| 43.94852789                              | 104.89991                                         | 0.371125253                             | 0.084888931                               |
| 43.45363487                              | 108.065041                                        | 0.450941954                             | 0.084039778                               |
| 93.54103803                              | 197.0564842                                       | -0.299436076                            | 0.053197137                               |
| 88.12694079                              | 171.5769043                                       | 0.486352495                             | 0.055017209                               |
| 106.0187383                              | 186.4183846                                       | -0.418454505                            | 0.053917906                               |
| 112.0233228                              | 235.4120407                                       | 0.239400979                             | 0.045928165                               |
| 96.75218227                              | 230.6491814                                       | -0.253714575                            | 0.053469806                               |
| 91.00877488                              | 195.1777267                                       | 0.434166602                             | 0.052990254                               |
| 92.53017312                              | 214.9626751                                       | 0.389127486                             | 0.052003982                               |
| 104.7111724                              | 241.5370026                                       | 0.132474874                             | 0.047909176                               |
| 62.90012774                              | 142.1210508                                       | 0.569531422                             | 0.066155428                               |
| 51.93778728                              | 136.1867943                                       | 0.431172663                             | 0.070539946                               |
| 56.09563462                              | 106.6453495                                       | 0.589077542                             | 0.078907044                               |
| 118.9656601                              | 249.6368675                                       | -0.039319644                            | 0.0432163                                 |
| 81.08190704                              | 207.7635956                                       | 0.089834553                             | 0.053656801                               |
| 108.8458319                              | 231.7914658                                       | 0.410539379                             | 0.049782317                               |
| 93.93655583                              | 223.8775969                                       | 0.139176616                             | 0.049689944                               |
| 74.7626564                               | 186.2009239                                       | 0.319406682                             | 0.057632885                               |
| 137.9295569                              | 286.2264566                                       | 0.023121676                             | 0.040084089                               |
| 116.3946268                              | 247.4178238                                       | -0.124968255                            | 0.043787929                               |
| 89.2648536                               | 188.5441475                                       | 0.134673655                             | 0.052592446                               |
| 87.41246548                              | 152.1891861                                       | -0.737414119                            | 0.073293698                               |
| 65.92576428                              | 176.9480515                                       | 0.374749804                             | 0.05918115                                |
| 53.48115483                              | 122.3337822                                       | 0.627098737                             | 0.076030688                               |
| 111.5687729                              | 240.772686                                        | 0.340497035                             | 0.046500486                               |
| 137.3051646                              | 264.2246971                                       | -0.456507956                            | 0.043739704                               |
| 47.15274318                              | 170.133709                                        | -0.041698284                            | 0.071097972                               |
| 77.42514356                              | 158.5547276                                       | -0.241221321                            | 0.062857143                               |
| 80.10245732                              | 166.7222748                                       | 0.248986172                             | 0.058667743                               |
| 115.3534634                              | 248.5850058                                       | 0.436408495                             | 0.046714122                               |
| 54.71421813                              | 142.7090044                                       | 0.213950882                             | 0.068529532                               |
| 60.14016377                              | 152.7109938                                       | 0.314902753                             | 0.064435172                               |
| 55.25962127                              | 153.3635559                                       | 0.299135209                             | 0.065942213                               |
| 210.6327956                              | 373.210556                                        | -0.154123688                            | 0.037760315                               |
| 78.29235266                              | 165.4491615                                       | -0.194471307                            | 0.055549093                               |
| 99.43765894                              | 199.3814545                                       | -0.294353114                            | 0.055192015                               |
| 72.69938398                              | 147.2994118                                       | -0.338331819                            | 0.066951636                               |
| 95.69136132                              | 180.5895042                                       | 0.552462959                             | 0.051929446                               |



| log.sigma.3.5.mm.3D_firstorder_MeanAbsoluteDeviation | log.sigma.3.5.mm.3D_firstorder_Energy | log.sigma.3.5.mm.3D_firstorder_RobustMeanAbsoluteDeviation | log.sigma.3.5.mm.3D_firstorder_Median |
|------------------------------------------------------|---------------------------------------|------------------------------------------------------------|---------------------------------------|
| 118.1907403                                          | 15899761.1                            | 82.96873259                                                | -23.10014534                          |
| 90.50453633                                          | 29463891.72                           | 60.31736409                                                | -19.55072784                          |
| 100.5972815                                          | 7547682.336                           | 73.07374515                                                | -63.34998512                          |
| 116.1633797                                          | 54157025.4                            | 84.62122414                                                | 23.6117382                            |
| 130.0303125                                          | 9694154.881                           | 90.1868837                                                 | -0.649273336                          |
| 93.7937381                                           | 10793052.63                           | 70.43984905                                                | -56.01986313                          |
| 71.66525094                                          | 2944041.818                           | 46.43525402                                                | -0.520434499                          |
| 141.6720223                                          | 29472479.96                           | 105.4472097                                                | -8.815971851                          |
| 129.4666621                                          | 54693437.34                           | 92.89530034                                                | -32.23179245                          |
| 90.93445471                                          | 43858121.89                           | 62.29434135                                                | -41.40930939                          |
| 102.3871092                                          | 13943093.04                           | 77.86743494                                                | -20.3847084                           |
| 108.8218016                                          | 27712191.83                           | 77.26661235                                                | -37.1979332                           |
| 100.0860691                                          | 31744894.74                           | 72.08320199                                                | 4.422829866                           |
| 110.8201767                                          | 18820522.4                            | 85.68673876                                                | 11.28655958                           |
| 99.188227                                            | 14402600.3                            | 70.05071603                                                | 18.56779099                           |
| 59.24543842                                          | 53545332.71                           | 31.49354725                                                | -0.640004814                          |
| 121.9327363                                          | 16144904.01                           | 90.90619236                                                | -28.95391464                          |
| 116.4540188                                          | 47352122.02                           | 84.55125538                                                | -31.32149124                          |
| 137.4252754                                          | 16431668.43                           | 99.46647935                                                | 28.4193449                            |
| 77.83285314                                          | 28053033.05                           | 53.7310863                                                 | -11.55288792                          |
| 73.2124757                                           | 53800812.17                           | 49.28226769                                                | -45.01028442                          |
| 105.9090775                                          | 29764832.77                           | 75.43706288                                                | -2.888058662                          |
| 92.68192446                                          | 39067649.13                           | 63.46429552                                                | -39.05645752                          |
| 112.9064575                                          | 9391087.572                           | 80.79893128                                                | 33.93927002                           |
| 79.46647848                                          | 15134739.71                           | 55.96435524                                                | -70.64396667                          |
| 115.2892722                                          | 15691255                              | 80.88304276                                                | -57.15114403                          |
| 68.86509961                                          | 31670696.89                           | 42.3294936                                                 | -13.60836124                          |
| 94.22865386                                          | 23936849.44                           | 65.67497986                                                | -68.57215118                          |
| 132.2632167                                          | 40859744.94                           | 105.4125474                                                | 15.00448227                           |
| 91.13519915                                          | 41063571.19                           | 61.47622275                                                | -47.82403183                          |
| 85.24339734                                          | 41053488.5                            | 59.63084616                                                | -54.858284                            |
| 95.25381827                                          | 85101564.14                           | 66.58628331                                                | -7.723082542                          |
| 117.6198287                                          | 41056629.47                           | 87.20946965                                                | 0.519171417                           |
| 123.8652373                                          | 2485268.446                           | 87.72185071                                                | 0.718350357                           |
| 124.1435453                                          | 7775326.102                           | 89.1830762                                                 | 2.789013565                           |
| 117.9663069                                          | 39499289.76                           | 90.94436404                                                | -13.0568881                           |
| 112.3428343                                          | 54742333.33                           | 83.05052145                                                | -49.47209358                          |
| 90.12356349                                          | 40323390.22                           | 66.21030578                                                | 4.73524642                            |
| 95.45912013                                          | 13109140.77                           | 61.44123629                                                | 20.9984436                            |
| 110.6128592                                          | 20337762.24                           | 80.09475546                                                | -17.19606781                          |
| 91.54644479                                          | 20600392.27                           | 62.82328755                                                | -24.1593895                           |
| 128.2595279                                          | 23752268.24                           | 94.93551978                                                | -14.91563892                          |
| 118.7911983                                          | 33563535.77                           | 91.89443082                                                | -15.27869606                          |
| 129.8061074                                          | 26138239.45                           | 93.94707047                                                | -6.358855247                          |
| 104.4246811                                          | 30819947.33                           | 75.51271009                                                | -8.986044407                          |
| 76.1294626                                           | 20700853.18                           | 55.210484                                                  | -43.79718399                          |
| 103.4111854                                          | 69126181.21                           | 74.47349853                                                | 3.818297148                           |
| 113.6996903                                          | 12488787.63                           | 86.84497933                                                | -43.33274078                          |
| 108.3599057                                          | 2916488.693                           | 65.20031786                                                | 11.10874557                           |
| 124.5719606                                          | 13773932.53                           | 77.63003208                                                | 24.74665833                           |
| 92.51118806                                          | 46114954.65                           | 65.95613805                                                | -11.38094759                          |
| 126.4654858                                          | 20717559.25                           | 105.1818976                                                | -55.1522522                           |
| 105.8451049                                          | 68017813.99                           | 74.61661338                                                | -19.10703659                          |
| 90.6441945                                           | 7545627.98                            | 63.93984708                                                | 12.22744179                           |
| 77.01205605                                          | 72626679.13                           | 47.73999349                                                | -4.175802708                          |
| 129.5430074                                          | 22882864.29                           | 94.76768609                                                | -28.9374485                           |
| 137.9178351                                          | 61355241.73                           | 104.5814414                                                | -27.22070122                          |
| 115.6385304                                          | 27780526.89                           | 78.08357673                                                | 18.046772                             |
| 103.717247                                           | 14893479.53                           | 73.77417541                                                | -47.24480438                          |
| 86.95227964                                          | 10061849.86                           | 65.20118063                                                | -18.1814003                           |
| 122.3106071                                          | 46555180.38                           | 92.83724708                                                | -46.69099045                          |
| 112.6827975                                          | 109394849.4                           | 79.70537713                                                | 1.438794374                           |
| 70.02069012                                          | 27075912.5                            | 45.57040552                                                | 10.04157495                           |
| 72.82246392                                          | 26208054.55                           | 47.10449875                                                | -18.36682701                          |
| 111.1789184                                          | 4518428.366                           | 79.5896733                                                 | -42.36473083                          |
| 105.9428932                                          | 30590735.41                           | 71.06341218                                                | 23.60805321                           |
| 119.4316569                                          | 9546321.704                           | 80.63072918                                                | -13.16117287                          |
| 126.0575515                                          | 74168559.64                           | 93.97191872                                                | -3.290171385                          |
| 119.7337824                                          | 11488018.18                           | 91.8103248                                                 | -47.17933846                          |
| 109.9532458                                          | 37135699.93                           | 79.36517013                                                | -22.33327484                          |
| 116.1980465                                          | 60240027.01                           | 86.32282147                                                | -37.30642128                          |
| 125.4792742                                          | 26577071.96                           | 96.09090298                                                | -33.75882339                          |
| 88.444026                                            | 66440335.62                           | 61.37257383                                                | -18.39717007                          |
| 81.93788496                                          | 75371060.07                           | 57.31499436                                                | -30.60664463                          |
| 78.773162                                            | 109611060                             | 48.41678223                                                | 11.13140249                           |
| 135.8948791                                          | 31352295.37                           | 102.4248061                                                | -32.78139877                          |
| 109.8430703                                          | 22353057.31                           | 82.45000918                                                | -53.19909286                          |
| 123.5354981                                          | 15720374.64                           | 92.15997023                                                | -60.93788147                          |
| 119.8492092                                          | 43612060.94                           | 90.41776862                                                | -83.83678818                          |
| 102.1631292                                          | 46212472.06                           | 75.78488561                                                | -49.22288322                          |
| 150.2121614                                          | 22008091.04                           | 113.2098615                                                | -112.3798065                          |
| 133.8431171                                          | 34810232.3                            | 100.8651481                                                | -9.926179886                          |
| 108.5219744                                          | 53865458.17                           | 75.8622568                                                 | 20.29167271                           |
| 96.77418492                                          | 2447777.118                           | 59.83298617                                                | 28.17401886                           |
| 97.99545846                                          | 47866766.94                           | 72.15964327                                                | -8.638441086                          |
| 78.81417021                                          | 57656694.31                           | 52.02928298                                                | -15.58317089                          |
| 128.0974839                                          | 19335656.24                           | 97.1525077                                                 | -50.0044899                           |
| 142.9132074                                          | 47834972.32                           | 107.3513876                                                | -11.78542948                          |
| 89.34250805                                          | 2082473.329                           | 66.39032468                                                | -19.35981178                          |
| 102.0211088                                          | 2009623.463                           | 68.90604172                                                | -42.70209122                          |
| 101.7437551                                          | 69519223.05                           | 68.59948973                                                | -7.626009941                          |
| 133.2571629                                          | 21665814.95                           | 100.5977306                                                | -83.43078995                          |
| 85.04429662                                          | 12724999.34                           | 58.94575919                                                | -28.107481                            |
| 90.40933836                                          | 53246931.26                           | 64.11318829                                                | -20.21507549                          |
| 87.70151411                                          | 67804878.15                           | 63.5746276                                                 | -6.377554417                          |
| 188.3534733                                          | 12726094.97                           | 149.4630961                                                | -34.33631134                          |
| 103.4438245                                          | 20928430.76                           | 70.92889861                                                | 21.62358093                           |
| 118.4412672                                          | 2586197.056                           | 83.02712058                                                | 19.05496025                           |
| 90.37470436                                          | 5038042.873                           | 61.89702462                                                | 30.08002281                           |
| 114.6536068                                          | 19155131.19                           | 76.66810877                                                | -57.20046997                          |

| log.sigma.3.5.mm.3D_firstorder_TotalEnergy | log.sigma.3.5.mm.3D_firstorder_Maximum | log.sigma.3.5.mm.3D_firstorder_RootMeanSquared | log.sigma.3.5.mm.3D_firstorder_90Percentile | log.sigma.3.5.mm.3D_firstorder_Minimum |
|--------------------------------------------|----------------------------------------|------------------------------------------------|---------------------------------------------|----------------------------------------|
| 429293549.6                                | 403.8726196                            | 150.0696774                                    | 171.4003754                                 | -401.6631165                           |
| 795525076.4                                | 437.8280664                            | 119.104126                                     | 145.4237122                                 | -338.625061                            |
| 203787423.1                                | 298.4096985                            | 131.8748389                                    | 118.024157                                  | -292.4881897                           |
| 1462239686                                 | 470.4470215                            | 143.3630037                                    | 200.4930725                                 | -379.2749634                           |
| 261742181.8                                | 342.5074158                            | 164.3265558                                    | 227.0431366                                 | -404.4763184                           |
| 291412421                                  | 229.0317383                            | 129.5587237                                    | 84.43617096                                 | -336.8908997                           |
| 79489129.08                                | 269.0066223                            | 93.46672741                                    | 133.3375885                                 | -232.9253235                           |
| 795756059                                  | 485.0147705                            | 171.5040893                                    | 182.7969299                                 | -445.8373718                           |
| 1476722808                                 | 421.0686997                            | 162.196084                                     | 183.1741211                                 | -451.1834106                           |
| 1184169291                                 | 396.5253296                            | 118.9828338                                    | 138.8978912                                 | -341.4483337                           |
| 376463512                                  | 220.7605133                            | 129.8454715                                    | 100.9165482                                 | -394.9977722                           |
| 748229179.5                                | 424.6551819                            | 136.7449625                                    | 163.6200455                                 | -328.9413147                           |
| 857112157.9                                | 414.7251587                            | 123.7179086                                    | 166.0005081                                 | -273.0422058                           |
| 508154104.7                                | 362.8363647                            | 129.7462861                                    | 163.8859756                                 | -292.3479004                           |
| 388870208.1                                | 369.0279236                            | 125.7364706                                    | 182.8330688                                 | -282.6958008                           |
| 1445723983                                 | 514.4158325                            | 87.79345921                                    | 109.2316116                                 | -319.547699                            |
| 435912408.4                                | 339.0492859                            | 152.0862748                                    | 136.0954605                                 | -387.5474854                           |
| 1278507295                                 | 435.8372498                            | 142.496911                                     | 185.7548691                                 | -297.4463501                           |
| 443655047.6                                | 413.4275513                            | 168.0271028                                    | 220.7652344                                 | -355.04599                             |
| 757431892.3                                | 360.6622925                            | 100.0767878                                    | 112.3948288                                 | -239.6056061                           |
| 1452621929                                 | 406.6278992                            | 101.4828912                                    | 90.46807022                                 | -377.4695129                           |
| 803650484.8                                | 544.5838623                            | 131.5489845                                    | 175.3938095                                 | -299.14151                             |
| 1054826526                                 | 402.677124                             | 119.6045742                                    | 141.1591644                                 | -329.8751526                           |
| 253559364.5                                | 313.7235107                            | 139.728632                                     | 174.0332336                                 | -445.8860168                           |
| 408637972.2                                | 311.821228                             | 112.1177141                                    | 81.8134407                                  | -283.9772339                           |
| 423663884.9                                | 408.0223083                            | 150.3658123                                    | 153.5853806                                 | -372.1487732                           |
| 855108815.9                                | 399.5235901                            | 95.59045541                                    | 118.2146339                                 | -388.4485474                           |
| 646294934.9                                | 376.8725281                            | 129.2440025                                    | 129.5856628                                 | -326.9405518                           |
| 1103213113                                 | 352.0997925                            | 152.1512311                                    | 189.2178772                                 | -373.1143494                           |
| 1108716422                                 | 511.7611694                            | 127.0985468                                    | 103.8755272                                 | -383.2656555                           |
| 1108444190                                 | 372.8220215                            | 112.6396191                                    | 108.3591492                                 | -350.2166748                           |
| 2297742232                                 | 483.7572021                            | 119.7957538                                    | 176.6264099                                 | -291.2424622                           |
| 1108528996                                 | 407.4346924                            | 142.1094496                                    | 174.8838806                                 | -345.9297485                           |
| 67102248.05                                | 314.7962341                            | 154.5859372                                    | 231.5418915                                 | -370.7007751                           |
| 209933804.8                                | 277.5908203                            | 153.0348226                                    | 153.785997                                  | -442.3978882                           |
| 1066480824                                 | 394.8917847                            | 139.8359891                                    | 159.2654434                                 | -385.6463928                           |
| 1478043000                                 | 480.5281372                            | 137.8686137                                    | 167.7333694                                 | -299.9833069                           |
| 1088731536                                 | 344.1015015                            | 109.6470597                                    | 139.7067169                                 | -280.7817078                           |
| 353946800.8                                | 377.2339783                            | 155.6935669                                    | 155.6935669                                 | -362.4506531                           |
| 549119580.4                                | 385.9680786                            | 139.2399436                                    | 133.197879                                  | -342.0800261                           |
| 556210591.3                                | 445.851532                             | 118.2194687                                    | 135.8826355                                 | -368.3245239                           |
| 641311242.3                                | 436.2225952                            | 157.8723575                                    | 164.9345306                                 | -409.1545105                           |
| 906215465.8                                | 339.9022827                            | 142.9707767                                    | 135.8392685                                 | -378.9872742                           |
| 705732465.1                                | 436.2004089                            | 159.689453                                     | 188.6570892                                 | -388.1802368                           |
| 832138577.8                                | 356.246521                             | 128.105611                                     | 146.6504883                                 | -414.6043091                           |
| 558923035.9                                | 307.378418                             | 96.39100966                                    | 110.2191277                                 | -220.0378113                           |
| 1866406893                                 | 401.9526367                            | 127.2948569                                    | 177.9411392                                 | -328.6689758                           |
| 337197265.9                                | 315.0748901                            | 146.3611667                                    | 108.269841                                  | -330.1470947                           |
| 78745194.71                                | 292.4933167                            | 147.5291191                                    | 188.0290802                                 | -469.9482422                           |
| 371896178.4                                | 469.9542236                            | 166.4756738                                    | 199.3553192                                 | -457.2107239                           |
| 1245103775                                 | 446.7668457                            | 116.0523703                                    | 139.9861618                                 | -314.033905                            |
| 559374099.9                                | 181.366272                             | 158.2765372                                    | 107.3466721                                 | -369.0308838                           |
| 1836480978                                 | 480.763031                             | 133.4205775                                    | 160.8037262                                 | -377.0577087                           |
| 203731955.5                                | 296.1821899                            | 112.9936283                                    | 141.9320068                                 | -295.3977051                           |
| 1960920336                                 | 441.0547791                            | 105.5147484                                    | 143.1403442                                 | -266.5317993                           |
| 617837335.7                                | 448.3947144                            | 161.346948                                     | 169.7938171                                 | -395.5539246                           |
| 1656591527                                 | 383.29422                              | 167.2655565                                    | 176.1896362                                 | -458.7094727                           |
| 750074226.1                                | 382.9012146                            | 146.5787375                                    | 150.0262299                                 | -449.0817871                           |
| 402123947.3                                | 306.3804321                            | 135.2651393                                    | 136.8702652                                 | -364.2460022                           |
| 271669946.2                                | 251.9352875                            | 106.8688072                                    | 109.459549                                  | -277.1587219                           |
| 1256989870                                 | 432.6256714                            | 148.2239998                                    | 162.6608154                                 | -321.5451666                           |
| 2953660933                                 | 609.6795654                            | 141.3147268                                    | 181.4140579                                 | -359.4311829                           |
| 731049637.5                                | 446.8083496                            | 93.60785881                                    | 131.6769745                                 | -286.7453308                           |
| 707617472.8                                | 314.038208                             | 97.96175161                                    | 123.6837234                                 | -259.3283691                           |
| 121997565.9                                | 221.7228008                            | 144.2991702                                    | 130.5517578                                 | -400.550415                            |
| 825949856                                  | 548.0080545                            | 140.3489704                                    | 216.1601868                                 | -333.836792                            |
| 257750686                                  | 361.6017761                            | 155.6574537                                    | 121.8917587                                 | -441.1673279                           |
| 2002551110                                 | 434.9758606                            | 152.3135724                                    | 198.8310242                                 | -324.9848022                           |
| 310176490.8                                | 271.2255554                            | 160.4926425                                    | 85.48153687                                 | -377.3991699                           |
| 1002663898                                 | 426.8105469                            | 135.8907112                                    | 179.7609406                                 | -321.2826538                           |
| 1626480729                                 | 457.7546387                            | 140.7685986                                    | 183.4218582                                 | -370.4179688                           |
| 717580942.9                                | 401.3126831                            | 153.4286964                                    | 150.0520935                                 | -347.6714478                           |
| 1793889062                                 | 435.9576416                            | 113.3847525                                    | 141.265184                                  | -286.3477173                           |
| 2035018622                                 | 359.7675171                            | 105.9368287                                    | 122.6341019                                 | -390.9775696                           |
| 2959498621                                 | 520.3554688                            | 109.2712342                                    | 157.9745071                                 | -335.6824341                           |
| 846511974.9                                | 465.7705078                            | 167.6110218                                    | 158.6988068                                 | -462.1032104                           |
| 603532547.4                                | 422.5455017                            | 141.4626793                                    | 109.3225037                                 | -376.4461365                           |
| 424450115.3                                | 365.5327148                            | 160.5338157                                    | 136.9853485                                 | -312.71757263                          |
| 1177525645                                 | 301.3792114                            | 157.2367341                                    | 135.9888809                                 | -440.4647827                           |
| 1247736746                                 | 395.4104309                            | 127.4272036                                    | 140.3012085                                 | -500.6096191                           |
| 594218458.1                                | 335.0038147                            | 208.9661391                                    | 123.0920204                                 | -323.1864624                           |
| 939876272.2                                | 457.8464661                            | 161.1161486                                    | 179.3277893                                 | -446.4527283                           |
| 1454367371                                 | 467.3836365                            | 138.8984733                                    | 202.6158463                                 | -397.2217407                           |
| 66089892.19                                | 262.3301393                            | 129.9277549                                    | 182.002063                                  | -401.9523315                           |
| 1292402707                                 | 394.3052673                            | 118.8100429                                    | 168.015213                                  | -262.8456726                           |
| 1556730746                                 | 439.5493164                            | 102.610818                                     | 138.7282028                                 | -349.6532593                           |
| 522062718.5                                | 398.254425                             | 157.6484335                                    | 164.5819763                                 | -331.3960876                           |
| 1291544253                                 | 353.2432251                            | 175.5605388                                    | 158.41418                                   | -505.7018127                           |
| 56226779.89                                | 207.0786591                            | 106.6753752                                    | 134.9022369                                 | -310.471344                            |
| 54259833.51                                | 232.4588928                            | 138.3447544                                    | 79.68290405                                 | -377.7282715                           |
| 1877019022                                 | 506.1181335                            | 132.2464091                                    | 168.3025208                                 | -381.7116089                           |
| 584977003.6                                | 431.1196899                            | 175.180259                                     | 160.8914185                                 | -346.5057983                           |
| 343574982.1                                | 305.8287354                            | 111.5843881                                    | 121.1081184                                 | -298.6387329                           |
| 1437667144                                 | 393.9057312                            | 114.0999982                                    | 121.2008347                                 | -319.4382935                           |
| 1830731710                                 | 374.6394653                            | 108.066716                                     | 131.1496353                                 | -280.0610657                           |
| 343604564.2                                | 372.2716064                            | 124.278333                                     | 214.3937317                                 | -502.568512                            |
| 565067630.4                                | 332.1399841                            | 131.1902457                                    | 186.3400574                                 | -389.1488647                           |
| 69827320.5                                 | 270.4568481                            | 145.0034218                                    | 183.6419434                                 | -355.7928467                           |
| 136027157.6                                | 278.335022                             | 115.2952259                                    | 167.0836121                                 | -275.7934875                           |
| 517188542.2                                | 530.0800781                            | 154.065642                                     | 155.3095306                                 | -471.6367188                           |

| log.sigma.3.5.mm.3D_firstorder_Entropy | log.sigma.3.5.mm.3D_firstorder_StandardDeviation | log.sigma.3.5.mm.3D_firstorder_Range | log.sigma.3.5.mm.3D_firstorder_Variance | log.sigma.3.5.mm.3D_firstorder_10Percentile |
|----------------------------------------|--------------------------------------------------|--------------------------------------|-----------------------------------------|---------------------------------------------|
| 4.563339713                            | 148.2166697                                      | 805.5357361                          | 21968.18119                             | -220.6200714                                |
| 4.218545776                            | 117.8178189                                      | 776.453125                           | 13881.03844                             | -170.1262207                                |
| 4.264850509                            | 122.3432797                                      | 590.8978882                          | 14967.87808                             | -203.5516739                                |
| 4.527258682                            | 141.8028766                                      | 849.7219849                          | 20108.05582                             | -168.8174255                                |
| 4.647530877                            | 164.1817577                                      | 746.9837341                          | 26955.64955                             | -235.7626953                                |
| 4.147764995                            | 112.0818997                                      | 565.9262379                          | 12562.35224                             | -214.2477325                                |
| 3.860008711                            | 93.46375687                                      | 501.9319458                          | 8735.473849                             | -118.3852966                                |
| 4.738402204                            | 169.9613828                                      | 930.8521423                          | 28886.87166                             | -259.380069                                 |
| 4.685590343                            | 159.1637461                                      | 872.2523804                          | 25333.09806                             | -239.3235809                                |
| 4.197937222                            | 115.4149013                                      | 737.9736633                          | 13320.59944                             | -160.0537506                                |
| 4.202179579                            | 121.8391039                                      | 615.7582855                          | 14844.76724                             | -225.3321167                                |
| 4.429799658                            | 134.7396929                                      | 753.5964966                          | 18154.78484                             | -188.0520004                                |
| 4.275640833                            | 123.5909654                                      | 687.7673645                          | 15274.72674                             | -146.451152                                 |
| 4.342180787                            | 129.7458544                                      | 655.1842651                          | 16833.98673                             | -181.2541504                                |
| 4.341614704                            | 123.443774                                       | 651.7237244                          | 15238.36535                             | -139.9850159                                |
| 3.637095088                            | 87.58038205                                      | 833.9635315                          | 7670.323319                             | -95.29413452                                |
| 4.512647558                            | 145.7042224                                      | 726.5967712                          | 21229.72089                             | -256.8878784                                |
| 4.475458235                            | 141.9363909                                      | 733.2835999                          | 20145.93907                             | -183.6177567                                |
| 4.695899853                            | 167.6741681                                      | 768.4735413                          | 28114.62666                             | -232.9166855                                |
| 3.980114406                            | 99.41113652                                      | 600.2678986                          | 9882.574064                             | -143.9457092                                |
| 3.928577259                            | 94.25979109                                      | 784.0974121                          | 8884.908215                             | -148.6437683                                |
| 4.384753181                            | 131.4908928                                      | 843.7253723                          | 17289.85488                             | -166.2128326                                |
| 4.224082102                            | 117.2921568                                      | 732.5522766                          | 13757.45005                             | -159.2625122                                |
| 4.436806862                            | 139.1156936                                      | 759.6095276                          | 19353.17621                             | -176.7894745                                |
| 3.963199931                            | 98.43619216                                      | 595.7984619                          | 9689.683927                             | -169.5812958                                |
| 4.509793645                            | 143.9606578                                      | 780.1710815                          | 20724.671                               | -223.7288208                                |
| 3.862337913                            | 95.11715513                                      | 787.9721375                          | 9047.2732                               | -119.257885                                 |
| 4.194504154                            | 118.3616713                                      | 703.8130798                          | 14009.48524                             | -192.9440887                                |
| 4.50504367                             | 152.1423482                                      | 725.2141418                          | 23147.29411                             | -205.5907654                                |
| 4.228994666                            | 117.213559                                       | 895.026825                           | 13739.01842                             | -197.8018799                                |
| 4.078931513                            | 106.6556363                                      | 723.0386963                          | 11375.42474                             | -162.0294891                                |
| 4.246349814                            | 119.2846345                                      | 774.9996643                          | 14228.82403                             | -132.5401535                                |
| 4.516086288                            | 142.0870098                                      | 753.3644409                          | 20188.71834                             | -192.9739441                                |
| 4.340071541                            | 153.742612                                       | 685.4970093                          | 23636.79075                             | -173.5129349                                |
| 4.502546368                            | 151.0702175                                      | 719.9887085                          | 22822.21062                             | -238.4094284                                |
| 4.448992743                            | 138.4802813                                      | 780.5381775                          | 19176.78831                             | -207.6246002                                |
| 4.375352893                            | 135.7270514                                      | 780.5114441                          | 18421.83248                             | -183.1412903                                |
| 4.146374048                            | 109.6437653                                      | 624.8832092                          | 12021.75526                             | -148.3045578                                |
| 4.28103917                             | 124.9615277                                      | 739.6846313                          | 15615.3834                              | -166.1464417                                |
| 4.425107943                            | 135.9789392                                      | 727.9761047                          | 18490.27189                             | -224.0731293                                |
| 4.246230497                            | 116.5253641                                      | 814.1760559                          | 13578.16048                             | -162.6357407                                |
| 4.597955849                            | 155.5177468                                      | 845.3710755                          | 24185.76956                             | -239.2124115                                |
| 4.418367094                            | 138.973949                                       | 718.8895569                          | 19313.7585                              | -229.1658539                                |
| 4.662197499                            | 159.0594772                                      | 824.3806458                          | 25299.91728                             | -234.7575439                                |
| 4.372147386                            | 127.4643728                                      | 770.8508301                          | 16247.16634                             | -179.3965164                                |
| 3.834916053                            | 92.92688741                                      | 527.4162292                          | 8635.406404                             | -134.3647842                                |
| 4.373507564                            | 127.1243639                                      | 730.6216125                          | 16160.60389                             | -160.2819443                                |
| 4.358549756                            | 135.007477                                       | 645.2219849                          | 18227.01885                             | -251.336734                                 |
| 4.330798228                            | 147.4886723                                      | 762.4415588                          | 21752.90846                             | -206.8063156                                |
| 4.600486956                            | 166.402276                                       | 927.1649475                          | 27689.71747                             | -256.0308441                                |
| 4.220360128                            | 115.5756551                                      | 760.8007507                          | 13357.73205                             | -155.190477                                 |
| 4.244618921                            | 142.0646705                                      | 550.3971558                          | 20182.37062                             | -266.1382629                                |
| 4.425866874                            | 132.7433647                                      | 857.8207397                          | 17620.80086                             | -180.8734283                                |
| 4.146547755                            | 112.9865733                                      | 591.579895                           | 12765.96576                             | -156.1233063                                |
| 3.975888212                            | 105.4941007                                      | 707.5865784                          | 11129.00528                             | -143.1723846                                |
| 4.640041262                            | 157.4786739                                      | 843.9486389                          | 24799.53272                             | -252.5334259                                |
| 4.70860597                             | 163.845509                                       | 842.0036926                          | 26845.35082                             | -252.987677                                 |
| 4.510768451                            | 146.2889564                                      | 831.9830017                          | 21400.45877                             | -219.763452                                 |
| 4.365987274                            | 128.4200574                                      | 670.6264343                          | 16491.71114                             | -206.4505951                                |
| 4.061064423                            | 104.0744168                                      | 529.0940094                          | 10831.48423                             | -166.4991302                                |
| 4.465316782                            | 144.7383664                                      | 754.1708374                          | 20949.1947                              | -201.7688477                                |
| 4.512085252                            | 141.1844137                                      | 969.1107483                          | 19933.03866                             | -172.0304779                                |
| 3.88324171                             | 92.86561343                                      | 733.5368004                          | 8624.022158                             | -113.1278343                                |
| 3.900605965                            | 96.49995819                                      | 673.3665771                          | 9312.24193                              | -136.0467529                                |
| 4.385266926                            | 137.1519093                                      | 622.2732239                          | 18810.64624                             | -238.3240173                                |
| 4.446593538                            | 136.3325201                                      | 881.8376465                          | 18586.55603                             | -134.0668335                                |
| 4.515527231                            | 151.2626318                                      | 802.7691004                          | 22880.38379                             | -257.3636139                                |
| 4.576873957                            | 152.2508429                                      | 759.9606628                          | 23180.31918                             | -207.8618042                                |
| 4.385223437                            | 141.4878817                                      | 648.6247253                          | 20018.82067                             | -292.6106567                                |
| 4.425880313                            | 135.5280573                                      | 748.0932007                          | 18367.85436                             | -173.47229                                  |
| 4.44686497                             | 139.9220897                                      | 828.1726074                          | 19578.19118                             | -182.0430359                                |
| 4.521288918                            | 148.4216595                                      | 748.9841309                          | 22028.989                               | -234.0785309                                |
| 4.152441664                            | 112.4988776                                      | 722.3053589                          | 12655.99747                             | -153.5933365                                |
| 4.041489878                            | 102.8800473                                      | 750.7540867                          | 10584.30414                             | -152.1959593                                |
| 4.062554378                            | 108.1255484                                      | 856.0379028                          | 11691.13422                             | -116.6507431                                |
| 4.67661743                             | 162.3280362                                      | 927.8737183                          | 26350.39133                             | -262.1897125                                |
| 4.391778097                            | 131.6339456                                      | 798.9916382                          | 17327.49564                             | -221.7064941                                |
| 4.478125463                            | 149.8266795                                      | 736.3084412                          | 22448.03389                             | -246.2988876                                |
| 4.487911798                            | 142.7758868                                      | 741.8439941                          | 20384.95386                             | -239.1129135                                |
| 4.292297038                            | 122.9158611                                      | 746.02005                            | 15108.30892                             | -180.9791107                                |
| 4.79175946                             | 179.5676258                                      | 858.1902771                          | 32244.53224                             | -340.7454651                                |
| 4.657583902                            | 159.7877414                                      | 904.2991943                          | 25532.12231                             | -239.2433472                                |
| 4.471083709                            | 136.9530544                                      | 864.6053772                          | 18756.13911                             | -157.2731247                                |
| 4.125256979                            | 129.0332764                                      | 664.2824707                          | 16649.58642                             | -165.6636169                                |
| 4.243871362                            | 118.7775999                                      | 657.1509399                          | 14108.11823                             | -141.4015656                                |
| 4.024461834                            | 102.5768986                                      | 789.2025757                          | 10522.02012                             | -120.8658295                                |
| 4.54970816                             | 152.4952479                                      | 729.6505127                          | 23254.80065                             | -234.9407425                                |
| 4.6918791                              | 170.8195107                                      | 858.9450378                          | 29179.30522                             | -291.5856903                                |
| 4.007747645                            | 106.5959003                                      | 517.5500031                          | 11362.68595                             | -137.6082581                                |
| 4.217113074                            | 127.8683202                                      | 610.1871643                          | 16350.30732                             | -240.7061249                                |
| 4.39937907                             | 132.0288935                                      | 887.8297424                          | 17431.62871                             | -174.6981049                                |
| 4.571325888                            | 159.6740505                                      | 777.6254883                          | 25495.80241                             | -271.9448547                                |
| 4.109911767                            | 107.6391826                                      | 604.4674683                          | 11586.19362                             | -167.0286545                                |
| 4.181745618                            | 112.2360911                                      | 713.3440247                          | 12596.94015                             | -158.4155746                                |
| 4.112115585                            | 107.6673249                                      | 654.700531                           | 11592.25285                             | -148.643486                                 |
| 4.865391857                            | 215.5313164                                      | 874.8401184                          | 46453.74834                             | -358.4254944                                |
| 4.395446609                            | 130.4414391                                      | 721.2888489                          | 17014.96904                             | -162.9328995                                |
| 4.336801748                            | 144.9746822                                      | 606.2496948                          | 21017.65848                             | -193.266629                                 |
| 4.157261794                            | 113.8698668                                      | 554.1285095                          | 12966.34657                             | -144.5322266                                |
| 4.547595177                            | 148.2235082                                      | 1001.716797                          | 21970.20837                             | -223.7524963                                |

| log.sigma.3.5.mm.3D_firstorder_Kurtosis | log.sigma.3.5.mm.3D_firstorder_Mean | log.sigma.3.5.mm.3D_glrIm_ShortRunLowGrayLevelEmphasis | log.sigma.3.5.mm.3D_glrIm_GrayLevelVariance |
|-----------------------------------------|-------------------------------------|--------------------------------------------------------|---------------------------------------------|
| 2.834288173                             | -23.51014422                        | 0.007283418                                            | 35.44454908                                 |
| 3.245286527                             | -17.45721615                        | 0.008847735                                            | 23.6698278                                  |
| 2.546137357                             | -49.22494334                        | 0.030533201                                            | 24.26984073                                 |
| 2.514975279                             | 21.09253413                         | 0.00601635                                             | 32.68416115                                 |
| 2.560107402                             | -6.896911609                        | 0.011401312                                            | 43.30000475                                 |
| 2.195819556                             | -64.98546479                        | 0.01482559                                             | 20.21654924                                 |
| 3.165034583                             | -0.745173709                        | 0.021709268                                            | 14.27299662                                 |
| 2.394009712                             | -22.9517101                         | 0.007540784                                            | 46.05999903                                 |
| 2.597390853                             | -31.2165278                         | 0.005337353                                            | 41.2084752                                  |
| 3.215882548                             | -28.91911659                        | 0.009233599                                            | 22.06258066                                 |
| 2.173840992                             | -44.88963389                        | 0.008883258                                            | 23.91276868                                 |
| 2.894384715                             | -23.3323795                         | 0.010732997                                            | 29.57517093                                 |
| 2.861899416                             | 5.603048855                         | 0.015832362                                            | 24.70320126                                 |
| 2.130783636                             | -0.334685821                        | 0.018295426                                            | 27.0095104                                  |
| 2.710878089                             | 23.90177187                         | 0.011034028                                            | 25.02651499                                 |
| 5.605301412                             | 6.112950183                         | 0.006699467                                            | 14.18566818                                 |
| 2.307197559                             | -43.59488604                        | 0.012237142                                            | 33.89223913                                 |
| 2.73314049                              | -12.62658228                        | 0.018968817                                            | 32.65188999                                 |
| 2.350910748                             | 10.88487966                         | 0.015904817                                            | 44.88773258                                 |
| 3.14182211                              | -11.52342811                        | 0.018378179                                            | 16.5777294                                  |
| 3.462968959                             | -37.60144943                        | 0.005225701                                            | 15.0363468                                  |
| 3.028429259                             | 3.909021783                         | 0.013409431                                            | 27.87356641                                 |
| 3.170317668                             | -23.40521551                        | 0.008400834                                            | 22.48177138                                 |
| 2.953928279                             | 13.07342253                         | 0.007152137                                            | 31.50657384                                 |
| 2.977894523                             | -53.67213331                        | 0.01613631                                             | 16.0801255                                  |
| 2.789032774                             | -43.41896488                        | 0.013346271                                            | 33.84543481                                 |
| 4.376838325                             | -9.500629758                        | 0.004566936                                            | 16.15587266                                 |
| 2.877773922                             | -51.90883284                        | 0.010420469                                            | 22.69897463                                 |
| 1.923913617                             | 1.644087205                         | 0.009846471                                            | 37.02398344                                 |
| 3.586210135                             | -49.1428751                         | 0.007470824                                            | 23.63748194                                 |
| 3.198579714                             | -39.22420547                        | 0.006782758                                            | 18.64928374                                 |
| 3.015482068                             | 11.05434691                         | 0.010987728                                            | 23.67294423                                 |
| 2.426143399                             | -2.52533957                         | 0.012555788                                            | 32.67251658                                 |
| 2.544134831                             | 16.12517404                         | 0.024692519                                            | 37.3894443                                  |
| 2.593088411                             | -24.44271504                        | 0.010576855                                            | 37.20337447                                 |
| 2.164918481                             | -19.42461165                        | 0.007380908                                            | 30.78086855                                 |
| 2.766154873                             | -24.20582882                        | 0.019021564                                            | 30.0352058                                  |
| 2.522903352                             | -0.849964886                        | 0.011465057                                            | 19.61003198                                 |
| 3.461398172                             | 9.175313635                         | 0.010482504                                            | 25.59210688                                 |
| 2.543683543                             | -29.95813761                        | 0.01415911                                             | 30.01678812                                 |
| 3.115105971                             | -19.94197361                        | 0.007759999                                            | 22.60097872                                 |
| 2.419801736                             | -27.16453008                        | 0.008820352                                            | 38.83009282                                 |
| 2.116835677                             | -33.56910006                        | 0.009145703                                            | 30.81092795                                 |
| 2.498313207                             | -14.17053735                        | 0.010296256                                            | 40.8009097                                  |
| 2.636744448                             | -12.80161023                        | 0.005466934                                            | 26.45481297                                 |
| 2.764209154                             | -25.60898941                        | 0.025514461                                            | 14.24289648                                 |
| 2.604029167                             | 6.586098981                         | 0.007688981                                            | 26.21534701                                 |
| 2.156232643                             | -56.52054742                        | 0.021569286                                            | 29.03624706                                 |
| 3.712055871                             | -3.45434975                         | 0.018460491                                            | 35.58133736                                 |
| 3.357746962                             | 4.942924478                         | 0.009514227                                            | 45.20261757                                 |
| 3.019544792                             | -10.50812041                        | 0.009598309                                            | 22.15336937                                 |
| 1.659739384                             | -69.77887646                        | 0.018095201                                            | 31.76425305                                 |
| 2.990722633                             | -13.42570841                        | 0.005943791                                            | 28.99821274                                 |
| 2.659084815                             | 1.262647017                         | 0.015008998                                            | 20.37194633                                 |
| 3.604260774                             | -2.221026266                        | 0.013683224                                            | 19.26290642                                 |
| 2.455035038                             | -35.11844127                        | 0.01443156                                             | 39.70255476                                 |
| 2.231446343                             | -33.65138314                        | 0.006373564                                            | 43.08186585                                 |
| 3.091606566                             | -9.212356992                        | 0.009182704                                            | 34.98586727                                 |
| 2.592248634                             | -42.48466499                        | 0.01074657                                             | 26.98631558                                 |
| 2.283014643                             | -24.27875045                        | 0.014617304                                            | 17.46134712                                 |
| 2.442241465                             | -31.95558506                        | 0.017537981                                            | 33.73769988                                 |
| 3.308088699                             | 6.06740156                          | 0.006769368                                            | 32.70979748                                 |
| 3.851943327                             | 11.76473853                         | 0.007966097                                            | 14.7568325                                  |
| 3.434076413                             | -16.86009631                        | 0.005699787                                            | 16.13659103                                 |
| 2.534819277                             | -44.8509119                         | 0.01238736                                             | 29.97058438                                 |
| 3.34331778                              | 33.33582849                         | 0.007384058                                            | 30.63613205                                 |
| 2.987876272                             | -36.72681731                        | 0.015578147                                            | 37.2550549                                  |
| 2.391192889                             | -4.370946201                        | 0.014998243                                            | 37.42085775                                 |
| 2.140998963                             | -75.75663414                        | 0.016511867                                            | 31.70106283                                 |
| 2.726900906                             | -9.921241535                        | 0.013536377                                            | 29.84331171                                 |
| 2.435941734                             | -15.41451204                        | 0.007794472                                            | 31.51114686                                 |
| 2.226132698                             | -38.87641811                        | 0.019432469                                            | 35.26324307                                 |
| 3.247615866                             | -14.14583413                        | 0.011173027                                            | 21.1929587                                  |
| 3.032495486                             | -25.26474901                        | 0.005036238                                            | 17.70981344                                 |
| 4.234561675                             | 15.78190106                         | 0.005951357                                            | 20.16023768                                 |
| 2.406235619                             | -41.75000953                        | 0.007119652                                            | 42.22224112                                 |
| 2.593518943                             | -51.80920751                        | 0.010612872                                            | 28.12251747                                 |
| 2.535054461                             | -57.64609336                        | 0.03333142                                             | 35.65436054                                 |
| 2.301976151                             | -65.86681029                        | 0.010098889                                            | 32.84403443                                 |
| 2.476312749                             | -33.60629862                        | 0.00794719                                             | 24.50135637                                 |
| 2.218090114                             | -106.8752313                        | 0.013619133                                            | 51.69722892                                 |
| 2.309973977                             | -20.64681668                        | 0.0077292                                              | 40.78589348                                 |
| 2.802593768                             | 23.16563757                         | 0.005267918                                            | 30.70621                                    |
| 3.600478926                             | 15.21956264                         | 0.012130594                                            | 27.20362153                                 |
| 2.581380412                             | 2.776337916                         | 0.015302309                                            | 22.76482884                                 |
| 3.715719105                             | -2.638152662                        | 0.006160346                                            | 17.83052375                                 |
| 2.331178978                             | -39.9778431                         | 0.016462413                                            | 37.0760957                                  |
| 2.339638332                             | -40.52403682                        | 0.005857582                                            | 46.44617273                                 |
| 2.429339143                             | -4.117004762                        | 0.013913983                                            | 18.59190117                                 |
| 2.786808743                             | -52.81064064                        | 0.018500572                                            | 26.53427857                                 |
| 3.211465093                             | -7.581820777                        | 0.006737587                                            | 29.42948422                                 |
| 2.459667674                             | -72.05775978                        | 0.034604795                                            | 41.07732929                                 |
| 2.802086783                             | -29.40887711                        | 0.01971768                                             | 19.57460675                                 |
| 3.106256918                             | -20.53946069                        | 0.011693563                                            | 20.92625187                                 |
| 2.797187045                             | -9.282363264                        | 0.010608701                                            | 19.14963586                                 |
| 1.876961777                             | -62.02436853                        | 0.015480825                                            | 73.52363475                                 |
| 2.859938149                             | 13.99683954                         | 0.007870581                                            | 27.80482323                                 |
| 2.591998049                             | 2.886838807                         | 0.029262104                                            | 33.04052448                                 |
| 2.812707052                             | -18.07325482                        | 0.015025551                                            | 20.96515195                                 |
| 3.685394672                             | -42.02396547                        | 0.006158874                                            | 36.45865547                                 |

| log.sigma.3.5.mm.3D_glrIm_LowGrayLevelRunEmphasis | log.sigma.3.5.mm.3D_glrIm_GrayLevelNonUniformityNormalized | log.sigma.3.5.mm.3D_glrIm_RunVariance | log.sigma.3.5.mm.3D_glrIm_GrayLevelNonUniformity |
|---------------------------------------------------|------------------------------------------------------------|---------------------------------------|--------------------------------------------------|
| 0.007631004                                       | 0.04822384                                                 | 0.074745619                           | 31.88328099                                      |
| 0.009521282                                       | 0.061421188                                                | 0.202595341                           | 112.1661126                                      |
| 0.032152806                                       | 0.057859016                                                | 0.064720706                           | 23.68947481                                      |
| 0.006288001                                       | 0.048260056                                                | 0.09074393                            | 118.1586797                                      |
| 0.01185024                                        | 0.045916264                                                | 0.080943169                           | 15.50704526                                      |
| 0.015670444                                       | 0.061299348                                                | 0.089949024                           | 36.59340314                                      |
| 0.023165345                                       | 0.083199742                                                | 0.116633012                           | 25.51478377                                      |
| 0.007814569                                       | 0.042034823                                                | 0.05590083                            | 40.05166409                                      |
| 0.005581967                                       | 0.043447046                                                | 0.080407058                           | 84.51106716                                      |
| 0.009985456                                       | 0.063526034                                                | 0.12471667                            | 178.5724096                                      |
| 0.009266845                                       | 0.060120866                                                | 0.075391815                           | 46.58300392                                      |
| 0.011432362                                       | 0.052562176                                                | 0.094518263                           | 71.90378125                                      |
| 0.016802043                                       | 0.05804133                                                 | 0.11648868                            | 109.9368234                                      |
| 0.019248791                                       | 0.053538295                                                | 0.086379697                           | 55.76948532                                      |
| 0.011586234                                       | 0.056733528                                                | 0.086522684                           | 47.88375573                                      |
| 0.007634045                                       | 0.100913395                                                | 0.516885099                           | 558.9381392                                      |
| 0.012832763                                       | 0.048680156                                                | 0.067992434                           | 32.03361142                                      |
| 0.020527537                                       | 0.049908504                                                | 0.112469129                           | 106.8155905                                      |
| 0.016630377                                       | 0.042845396                                                | 0.0621047                             | 23.55905008                                      |
| 0.020402913                                       | 0.071412638                                                | 0.233348765                           | 174.0402851                                      |
| 0.005734217                                       | 0.07625674                                                 | 0.194242554                           | 348.9776274                                      |
| 0.014192145                                       | 0.0541156                                                  | 0.087335528                           | 86.66798786                                      |
| 0.009031624                                       | 0.062945721                                                | 0.112324239                           | 157.5515812                                      |
| 0.007342863                                       | 0.052921672                                                | 0.076092685                           | 23.78449883                                      |
| 0.0173132                                         | 0.073196974                                                | 0.11899275                            | 80.2509165                                       |
| 0.014067795                                       | 0.04959792                                                 | 0.080571519                           | 32.13566883                                      |
| 0.00508567                                        | 0.081365803                                                | 0.351801919                           | 235.3851738                                      |
| 0.011182557                                       | 0.061963955                                                | 0.114357236                           | 81.53435224                                      |
| 0.010229764                                       | 0.047705703                                                | 0.075446539                           | 79.23440259                                      |
| 0.008105275                                       | 0.06121032                                                 | 0.235446555                           | 135.2792201                                      |
| 0.007331034                                       | 0.068279041                                                | 0.130744505                           | 196.8044961                                      |
| 0.011937477                                       | 0.060230418                                                | 0.172101702                           | 318.7103304                                      |
| 0.013132499                                       | 0.048211948                                                | 0.08747414                            | 91.03150788                                      |
| 0.025485519                                       | 0.057999738                                                | 0.045199786                           | 5.778057186                                      |
| 0.010827724                                       | 0.051788872                                                | 0.057935259                           | 16.31784556                                      |
| 0.007746439                                       | 0.050025028                                                | 0.090590685                           | 93.75341448                                      |
| 0.020332097                                       | 0.054411717                                                | 0.117245506                           | 143.6005787                                      |
| 0.012278791                                       | 0.062641583                                                | 0.136664962                           | 189.8450257                                      |
| 0.010942325                                       | 0.062856219                                                | 0.110046668                           | 48.30430662                                      |
| 0.014976469                                       | 0.052079261                                                | 0.089731259                           | 50.88098692                                      |
| 0.008298482                                       | 0.060815833                                                | 0.14370545                            | 80.72784394                                      |
| 0.009212138                                       | 0.045961633                                                | 0.068365414                           | 41.22262046                                      |
| 0.009531058                                       | 0.051254645                                                | 0.078471633                           | 78.93463892                                      |
| 0.010727279                                       | 0.044206405                                                | 0.077582063                           | 42.56441429                                      |
| 0.005725146                                       | 0.05430541                                                 | 0.092886248                           | 94.64711229                                      |
| 0.028128922                                       | 0.078164681                                                | 0.159585469                           | 155.253073                                       |
| 0.00811867                                        | 0.053908349                                                | 0.095091173                           | 212.7448069                                      |
| 0.022864414                                       | 0.052934323                                                | 0.076697805                           | 28.90648389                                      |
| 0.019063783                                       | 0.063777023                                                | 0.054154785                           | 8.134410673                                      |
| 0.009870895                                       | 0.05248597                                                 | 0.07120271                            | 24.55543732                                      |
| 0.010334639                                       | 0.060347513                                                | 0.157215825                           | 185.7906249                                      |
| 0.019369144                                       | 0.056765341                                                | 0.098312442                           | 43.54371401                                      |
| 0.006347702                                       | 0.052600699                                                | 0.137804403                           | 182.510599                                       |
| 0.01607998                                        | 0.064600536                                                | 0.101348843                           | 35.05516289                                      |
| 0.015074395                                       | 0.07759973                                                 | 0.283011026                           | 432.8211936                                      |
| 0.014990856                                       | 0.044237395                                                | 0.060925851                           | 36.79042178                                      |
| 0.006620313                                       | 0.04190298                                                 | 0.062987249                           | 87.05132413                                      |
| 0.009496228                                       | 0.052540385                                                | 0.083699779                           | 63.36612408                                      |
| 0.011332009                                       | 0.054093228                                                | 0.093137492                           | 40.71406224                                      |
| 0.015621402                                       | 0.066219479                                                | 0.112876488                           | 53.35095073                                      |
| 0.018726149                                       | 0.050348941                                                | 0.094609661                           | 98.80956865                                      |
| 0.007166858                                       | 0.049859726                                                | 0.119948173                           | 250.0980605                                      |
| 0.008672763                                       | 0.080466483                                                | 0.226822458                           | 217.649743                                       |
| 0.006270369                                       | 0.07762502                                                 | 0.290743238                           | 179.9518172                                      |
| 0.012846471                                       | 0.053313998                                                | 0.05863864                            | 10.96564337                                      |
| 0.007751317                                       | 0.053832058                                                | 0.100391892                           | 77.26139633                                      |
| 0.016421563                                       | 0.053218999                                                | 0.074027526                           | 19.73901781                                      |
| 0.016041787                                       | 0.04562938                                                 | 0.103318527                           | 134.7564363                                      |
| 0.01748279                                        | 0.053370284                                                | 0.066056084                           | 22.43501814                                      |
| 0.014261999                                       | 0.052458224                                                | 0.091323795                           | 97.98762517                                      |
| 0.008332459                                       | 0.051477864                                                | 0.109696586                           | 144.0647652                                      |
| 0.020804971                                       | 0.047721364                                                | 0.084049458                           | 50.28232749                                      |
| 0.012164743                                       | 0.064103343                                                | 0.176016053                           | 294.9391959                                      |
| 0.005530812                                       | 0.068531354                                                | 0.214101878                           | 403.541923                                       |
| 0.006451565                                       | 0.073060764                                                | 0.225643989                           | 583.1770645                                      |
| 0.007376817                                       | 0.043214728                                                | 0.066038563                           | 45.57214891                                      |
| 0.011055021                                       | 0.053407225                                                | 0.084228549                           | 55.6220192                                       |
| 0.035772367                                       | 0.04931569                                                 | 0.077835911                           | 28.21892453                                      |
| 0.01057853                                        | 0.049219312                                                | 0.082717961                           | 81.03858042                                      |
| 0.008441217                                       | 0.056991554                                                | 0.100417755                           | 149.5647652                                      |
| 0.013999483                                       | 0.039909303                                                | 0.064269605                           | 19.05108809                                      |
| 0.00796817                                        | 0.043734881                                                | 0.055003566                           | 55.70373683                                      |
| 0.00553095                                        | 0.051587191                                                | 0.108094548                           | 132.849017                                       |
| 0.012299492                                       | 0.070868634                                                | 0.060380439                           | 9.777378474                                      |
| 0.016377635                                       | 0.058776809                                                | 0.114550979                           | 182.8173531                                      |
| 0.006713476                                       | 0.072796088                                                | 0.191141747                           | 350.6966623                                      |
| 0.017410683                                       | 0.046287057                                                | 0.075163627                           | 33.89421488                                      |
| 0.006098276                                       | 0.043633967                                                | 0.060810374                           | 64.1874098                                       |
| 0.014358913                                       | 0.069556946                                                | 0.089285991                           | 11.80239994                                      |
| 0.018775793                                       | 0.062583453                                                | 0.0428382                             | 6.340246415                                      |
| 0.007186555                                       | 0.054814228                                                | 0.1883324                             | 194.4042121                                      |
| 0.036442188                                       | 0.046226937                                                | 0.062987751                           | 30.85425432                                      |
| 0.020879072                                       | 0.064318934                                                | 0.185135697                           | 58.06365346                                      |
| 0.01250308                                        | 0.062521057                                                | 0.184797092                           | 227.4004252                                      |
| 0.011494628                                       | 0.064484808                                                | 0.168224242                           | 333.6890594                                      |
| 0.016058512                                       | 0.037763026                                                | 0.048290077                           | 9.147008193                                      |
| 0.008227479                                       | 0.054591609                                                | 0.09089922                            | 61.40873172                                      |
| 0.030747526                                       | 0.055410541                                                | 0.045714179                           | 6.521181359                                      |
| 0.015976365                                       | 0.065829096                                                | 0.099840628                           | 23.0020759                                       |
| 0.006430579                                       | 0.050740228                                                | 0.095741157                           | 37.85817547                                      |

| log.sigma.3.5.mm.3D_glrIm_LongRunEmphasis | log.sigma.3.5.mm.3D_glrIm_ShortRunHighGrayLevelEmphasis | log.sigma.3.5.mm.3D_glrIm_RunLengthNonUniformity | log.sigma.3.5.mm.3D_glrIm_ShortRunEmphasis |
|-------------------------------------------|---------------------------------------------------------|--------------------------------------------------|--------------------------------------------|
| 1.216284935                               | 301.987061                                              | 583.3823631                                      | 0.952065144                                |
| 1.502389707                               | 199.9620319                                             | 1464.386245                                      | 0.914044023                                |
| 1.191153454                               | 132.4661617                                             | 366.5410582                                      | 0.956867292                                |
| 1.251276147                               | 314.9025565                                             | 2137.085309                                      | 0.947465739                                |
| 1.215446976                               | 324.9694805                                             | 302.7481229                                      | 0.957145921                                |
| 1.251983431                               | 155.5650786                                             | 519.793583                                       | 0.946702823                                |
| 1.33260473                                | 117.9137348                                             | 257.4907727                                      | 0.931026066                                |
| 1.162399486                               | 344.8692323                                             | 865.0775532                                      | 0.963115956                                |
| 1.224142087                               | 359.7702685                                             | 1717.966147                                      | 0.952272869                                |
| 1.341796554                               | 192.0432903                                             | 2354.390161                                      | 0.931525108                                |
| 1.217692473                               | 229.4253446                                             | 685.2892835                                      | 0.952319709                                |
| 1.271980944                               | 205.1971265                                             | 1176.54367                                       | 0.941561246                                |
| 1.319259122                               | 153.9311412                                             | 1606.135996                                      | 0.935910713                                |
| 1.239986355                               | 174.4337415                                             | 913.963705                                       | 0.949588533                                |
| 1.254500141                               | 196.9829168                                             | 729.6491038                                      | 0.943680134                                |
| 2.118753802                               | 178.9012499                                             | 3873.541433                                      | 0.859616907                                |
| 1.195829795                               | 241.1582555                                             | 588.6553964                                      | 0.956813489                                |
| 1.30265628                                | 172.2729428                                             | 1835.575972                                      | 0.94030681                                 |
| 1.184782017                               | 287.1747993                                             | 492.7648607                                      | 0.957568099                                |
| 1.562744603                               | 110.5117106                                             | 1932.210893                                      | 0.90880171                                 |
| 1.502927544                               | 223.2463401                                             | 3628.871301                                      | 0.909747565                                |
| 1.244956611                               | 181.2423095                                             | 1403.354805                                      | 0.948519265                                |
| 1.305939119                               | 199.3059805                                             | 2134.5491                                        | 0.938342437                                |
| 1.223711978                               | 370.7194796                                             | 394.776605                                       | 0.9500953                                  |
| 1.328651728                               | 119.03025                                               | 923.5002374                                      | 0.93355534                                 |
| 1.230719489                               | 217.4826648                                             | 569.2520877                                      | 0.94990932                                 |
| 1.797801475                               | 248.8035487                                             | 2154.566633                                      | 0.885455245                                |
| 1.306161859                               | 172.5459937                                             | 1128.704729                                      | 0.940055472                                |
| 1.208287401                               | 265.5801964                                             | 1486.60442                                       | 0.956693543                                |
| 1.566760291                               | 215.4607618                                             | 1746.971651                                      | 0.908385126                                |
| 1.351503093                               | 204.8117658                                             | 2415.115742                                      | 0.93131367                                 |
| 1.433152799                               | 181.6412148                                             | 4341.901967                                      | 0.922942537                                |
| 1.248488142                               | 227.5876311                                             | 1643.468664                                      | 0.946584678                                |
| 1.13600194                                | 287.9024542                                             | 91.54317741                                      | 0.967752794                                |
| 1.170370951                               | 331.775479                                              | 284.7759603                                      | 0.961146287                                |
| 1.255105466                               | 263.225016                                              | 1630.438115                                      | 0.946042101                                |
| 1.312339772                               | 157.5538918                                             | 2256.180979                                      | 0.938952358                                |
| 1.364694482                               | 164.5451423                                             | 2527.13774                                       | 0.929548057                                |
| 1.299928173                               | 259.6751426                                             | 662.0097508                                      | 0.940838214                                |
| 1.244821385                               | 199.7443181                                             | 858.0143273                                      | 0.949824426                                |
| 1.382877255                               | 224.296252                                              | 1100.849149                                      | 0.926971896                                |
| 1.198601912                               | 296.8705567                                             | 798.5024437                                      | 0.955524283                                |
| 1.218092795                               | 248.3109684                                             | 1368.963532                                      | 0.954198352                                |
| 1.212652223                               | 283.4995492                                             | 858.6674487                                      | 0.95574232                                 |
| 1.25671714                                | 299.4690991                                             | 1519.278452                                      | 0.946933691                                |
| 1.425786399                               | 83.79014158                                             | 1619.827643                                      | 0.919918733                                |
| 1.265421672                               | 232.4719828                                             | 3413.183866                                      | 0.944180575                                |
| 1.218200422                               | 174.6719499                                             | 483.3329129                                      | 0.952948337                                |
| 1.162151333                               | 391.9992846                                             | 116.1901529                                      | 0.962957525                                |
| 1.202596447                               | 412.787611                                              | 416.9305038                                      | 0.955686578                                |
| 1.39806376                                | 183.1075983                                             | 2560.838303                                      | 0.928303006                                |
| 1.265529426                               | 185.0968523                                             | 670.9996961                                      | 0.947395001                                |
| 1.355558076                               | 269.6222931                                             | 2924.861597                                      | 0.933546379                                |
| 1.290078677                               | 167.9647491                                             | 462.3067834                                      | 0.938304584                                |
| 1.66800968                                | 137.6890146                                             | 4303.531662                                      | 0.898068553                                |
| 1.17923051                                | 259.2198575                                             | 747.7021089                                      | 0.959181957                                |
| 1.179654144                               | 360.55578                                               | 1876.980782                                      | 0.960598006                                |
| 1.235921976                               | 343.7480991                                             | 1058.442022                                      | 0.949660037                                |
| 1.264007561                               | 209.1433173                                             | 649.4547638                                      | 0.943473052                                |
| 1.31549971                                | 142.995552                                              | 685.2115258                                      | 0.935897782                                |
| 1.261853857                               | 178.962506                                              | 1704.003411                                      | 0.945658722                                |
| 1.31628892                                | 265.6802659                                             | 4283.989924                                      | 0.938756375                                |
| 1.552965792                               | 169.3725018                                             | 2162.237911                                      | 0.910782669                                |
| 1.689091809                               | 213.1078918                                             | 1771.004604                                      | 0.894368416                                |
| 1.173917052                               | 270.0711178                                             | 185.7591936                                      | 0.960312449                                |
| 1.275597905                               | 267.8717126                                             | 1241.582639                                      | 0.943790507                                |
| 1.206279218                               | 314.8647077                                             | 331.4458029                                      | 0.956218343                                |
| 1.277137409                               | 207.9662386                                             | 2559.986883                                      | 0.944781412                                |
| 1.193116192                               | 208.3102414                                             | 375.5012094                                      | 0.956580196                                |
| 1.252595247                               | 195.3614128                                             | 1630.964241                                      | 0.947576004                                |
| 1.293611573                               | 243.6616031                                             | 2413.052619                                      | 0.942134931                                |
| 1.234805109                               | 196.4671683                                             | 927.6703896                                      | 0.95063165                                 |
| 1.446043548                               | 155.1541308                                             | 3761.418106                                      | 0.921120954                                |
| 1.521507432                               | 241.1171838                                             | 4714.004596                                      | 0.913184615                                |
| 1.556023349                               | 227.6198765                                             | 6291.888911                                      | 0.907304893                                |
| 1.187966598                               | 345.8295758                                             | 947.626842                                       | 0.958751259                                |
| 1.237592534                               | 225.8010315                                             | 914.8129033                                      | 0.949588816                                |
| 1.216224465                               | 159.4200984                                             | 508.391635                                       | 0.95443148                                 |
| 1.233563818                               | 274.4803308                                             | 1448.411077                                      | 0.950248542                                |
| 1.27891009                                | 215.2848811                                             | 2258.297917                                      | 0.941989101                                |
| 1.1821451                                 | 342.4631871                                             | 431.5605643                                      | 0.960600735                                |
| 1.164427502                               | 339.3615798                                             | 1151.682624                                      | 0.961544952                                |
| 1.287445826                               | 316.7774136                                             | 2226.85426                                       | 0.943436944                                |
| 1.17360305                                | 344.0165886                                             | 125.3664559                                      | 0.962409034                                |
| 1.306681902                               | 151.4050812                                             | 2665.874887                                      | 0.939896945                                |
| 1.487742891                               | 210.4176386                                             | 3854.625324                                      | 0.913350565                                |
| 1.205155919                               | 200.5393809                                             | 655.5261541                                      | 0.957439871                                |
| 1.175310841                               | 425.7521613                                             | 1328.623091                                      | 0.96089547                                 |
| 1.257847187                               | 187.4171528                                             | 147.3161922                                      | 0.94470346                                 |
| 1.11891974                                | 229.9797429                                             | 94.84831519                                      | 0.974195796                                |
| 1.451317859                               | 273.5048661                                             | 2926.795641                                      | 0.925045391                                |
| 1.183128048                               | 173.4695726                                             | 599.8628909                                      | 0.958967179                                |
| 1.471825711                               | 136.7163037                                             | 728.1871124                                      | 0.916445568                                |
| 1.454606862                               | 169.1217842                                             | 2979.38833                                       | 0.922034093                                |
| 1.431168348                               | 156.1583717                                             | 4233.352792                                      | 0.921964428                                |
| 1.141487537                               | 421.4308073                                             | 223.1160411                                      | 0.967911172                                |
| 1.261406641                               | 299.3264543                                             | 970.4884211                                      | 0.943252434                                |
| 1.139569544                               | 242.9542537                                             | 107.9253016                                      | 0.966620359                                |
| 1.278870088                               | 184.2919456                                             | 300.5340685                                      | 0.941791978                                |
| 1.268361637                               | 341.6389114                                             | 645.074043                                       | 0.943814801                                |

| log.sigma.3.5.mm.3D_glrIm_LongRunHighGrayLevelEmphasis | log.sigma.3.5.mm.3D_glrIm_RunPercentage | log.sigma.3.5.mm.3D_glrIm_LongRunLowGrayLevelEmphasis | log.sigma.3.5.mm.3D_glrIm_RunEntropy |
|--------------------------------------------------------|-----------------------------------------|-------------------------------------------------------|--------------------------------------|
| 367.7543824                                            | 0.936478536                             | 0.009176849                                           | 4.881064545                          |
| 312.2019432                                            | 0.878819303                             | 0.013140379                                           | 4.819356811                          |
| 158.0822233                                            | 0.943459766                             | 0.039834366                                           | 4.53778159                           |
| 416.9608043                                            | 0.929149029                             | 0.007546608                                           | 4.908222575                          |
| 413.2941444                                            | 0.940432826                             | 0.01379788                                            | 4.894857327                          |
| 198.9160014                                            | 0.928460342                             | 0.019621983                                           | 4.503381072                          |
| 160.4567034                                            | 0.909609678                             | 0.029667074                                           | 4.27601994                           |
| 408.9548221                                            | 0.950944265                             | 0.009011797                                           | 5.002223626                          |
| 453.797634                                             | 0.935619936                             | 0.006717796                                           | 5.030591163                          |
| 258.3283184                                            | 0.907309927                             | 0.013578387                                           | 4.686423028                          |
| 291.4038534                                            | 0.936843084                             | 0.01097715                                            | 4.530280646                          |
| 264.0201712                                            | 0.922973113                             | 0.014567189                                           | 4.832005772                          |
| 210.4261633                                            | 0.913211186                             | 0.021508067                                           | 4.722669363                          |
| 225.8068555                                            | 0.93174625                              | 0.023879385                                           | 4.690617018                          |
| 254.3680808                                            | 0.926454446                             | 0.014024555                                           | 4.693407266                          |
| 410.584309                                             | 0.7953184                               | 0.014622907                                           | 4.632457976                          |
| 301.2287651                                            | 0.94269341                              | 0.015382581                                           | 4.797626818                          |
| 219.128003                                             | 0.91773321                              | 0.028277935                                           | 4.898063772                          |
| 353.7593735                                            | 0.944752842                             | 0.01965306                                            | 4.961046259                          |
| 174.8672055                                            | 0.869799248                             | 0.031903203                                           | 4.605030997                          |
| 349.9604921                                            | 0.875839321                             | 0.008501664                                           | 4.55607215                           |
| 230.2785414                                            | 0.931037567                             | 0.017781119                                           | 4.747490132                          |
| 259.5746134                                            | 0.916401431                             | 0.012084616                                           | 4.663382374                          |
| 485.1183124                                            | 0.93427155                              | 0.00817177                                            | 4.762933929                          |
| 156.2024295                                            | 0.910426783                             | 0.022943821                                           | 4.428132362                          |
| 265.8976365                                            | 0.933495899                             | 0.01724128                                            | 4.842587224                          |
| 481.4614814                                            | 0.833836389                             | 0.008533199                                           | 4.670428068                          |
| 220.7764326                                            | 0.917977347                             | 0.015030247                                           | 4.61480216                           |
| 341.5445891                                            | 0.941032905                             | 0.011987358                                           | 4.821833097                          |
| 363.6672382                                            | 0.868940265                             | 0.011594744                                           | 4.862462507                          |
| 275.9282787                                            | 0.906574394                             | 0.010131989                                           | 4.564141608                          |
| 262.7339037                                            | 0.892139058                             | 0.016884037                                           | 4.794953024                          |
| 298.3550803                                            | 0.928752507                             | 0.01576315                                            | 4.896445594                          |
| 337.2987331                                            | 0.957840237                             | 0.028678767                                           | 4.491709546                          |
| 402.3333735                                            | 0.948795181                             | 0.011873389                                           | 4.743245883                          |
| 348.7978446                                            | 0.927760853                             | 0.009447882                                           | 4.829797899                          |
| 205.5422288                                            | 0.916239316                             | 0.026589499                                           | 4.813387571                          |
| 234.6229334                                            | 0.90355947                              | 0.016394253                                           | 4.639771816                          |
| 361.168148                                             | 0.919944726                             | 0.01302909                                            | 4.680043973                          |
| 252.8252083                                            | 0.931289873                             | 0.018860883                                           | 4.783145539                          |
| 324.2872075                                            | 0.900323557                             | 0.010952037                                           | 4.74600077                           |
| 366.4244056                                            | 0.941076762                             | 0.010912834                                           | 4.905163253                          |
| 318.3968513                                            | 0.937880633                             | 0.011320262                                           | 4.750939926                          |
| 352.7219773                                            | 0.939362101                             | 0.01273843                                            | 4.974317886                          |
| 393.2421985                                            | 0.927951176                             | 0.006934605                                           | 4.757068877                          |
| 114.6105728                                            | 0.891244303                             | 0.042201802                                           | 4.377498088                          |
| 304.6284016                                            | 0.925060406                             | 0.010131126                                           | 4.781268475                          |
| 213.0764143                                            | 0.936667106                             | 0.028820863                                           | 4.670265668                          |
| 477.9696296                                            | 0.951779564                             | 0.021507206                                           | 4.517774263                          |
| 518.3606412                                            | 0.9410308                               | 0.011368393                                           | 4.898714182                          |
| 261.8180736                                            | 0.899105859                             | 0.014164521                                           | 4.730383587                          |
| 245.4696994                                            | 0.927448609                             | 0.025380138                                           | 4.601251978                          |
| 375.5815929                                            | 0.907937914                             | 0.008430834                                           | 4.903400509                          |
| 227.4178193                                            | 0.918000781                             | 0.020727639                                           | 4.547315761                          |
| 238.5108952                                            | 0.853370912                             | 0.023437632                                           | 4.704919196                          |
| 311.6209723                                            | 0.9461801                               | 0.017376823                                           | 4.925521434                          |
| 435.715199                                             | 0.947385036                             | 0.007746723                                           | 4.996766131                          |
| 450.3073159                                            | 0.932536141                             | 0.010889721                                           | 4.874585399                          |
| 267.6814407                                            | 0.924588925                             | 0.013975343                                           | 4.748050275                          |
| 194.160704                                             | 0.914607526                             | 0.020514503                                           | 4.477138361                          |
| 222.762495                                             | 0.926126257                             | 0.02418406                                            | 4.857264009                          |
| 363.3291583                                            | 0.915536271                             | 0.009141838                                           | 4.961928474                          |
| 276.6719396                                            | 0.87386109                              | 0.012869276                                           | 4.510390044                          |
| 391.1844185                                            | 0.848238177                             | 0.00986439                                            | 4.629310571                          |
| 321.9380966                                            | 0.947890819                             | 0.014760316                                           | 4.597665122                          |
| 352.9221022                                            | 0.923869434                             | 0.009481945                                           | 4.850269946                          |
| 392.3060234                                            | 0.941233893                             | 0.019898353                                           | 4.792499332                          |
| 267.0363045                                            | 0.923726571                             | 0.021241683                                           | 4.976590956                          |
| 249.1800033                                            | 0.942566402                             | 0.02195232                                            | 4.662047883                          |
| 245.298937                                             | 0.928814597                             | 0.01761388                                            | 4.805448486                          |
| 318.0235221                                            | 0.920571862                             | 0.011022099                                           | 4.860421052                          |
| 245.3505691                                            | 0.933228861                             | 0.026893418                                           | 4.860451226                          |
| 227.4836748                                            | 0.889869612                             | 0.017488982                                           | 4.711219425                          |
| 381.0772257                                            | 0.876551977                             | 0.008405456                                           | 4.648038275                          |
| 379.2589193                                            | 0.868954248                             | 0.009344101                                           | 4.735840357                          |
| 426.4553685                                            | 0.944926937                             | 0.008521869                                           | 4.964620784                          |
| 290.4584079                                            | 0.932442669                             | 0.013076078                                           | 4.742509802                          |
| 188.9410292                                            | 0.937957125                             | 0.046709827                                           | 4.775469283                          |
| 344.4540478                                            | 0.933368219                             | 0.012710551                                           | 4.843170251                          |
| 281.2845916                                            | 0.922130926                             | 0.010808884                                           | 4.706702113                          |
| 402.4761091                                            | 0.947191697                             | 0.015696764                                           | 5.033483189                          |
| 411.6639129                                            | 0.949807836                             | 0.008971794                                           | 4.931100134                          |
| 426.1088734                                            | 0.922195283                             | 0.006863665                                           | 4.88409382                           |
| 417.3927438                                            | 0.950132626                             | 0.013039822                                           | 4.342700346                          |
| 200.045067                                             | 0.917247011                             | 0.021767751                                           | 4.673194632                          |
| 323.5432362                                            | 0.879642636                             | 0.009775988                                           | 4.640318844                          |
| 237.8574714                                            | 0.941170655                             | 0.021938043                                           | 4.844709795                          |
| 520.0341352                                            | 0.947809278                             | 0.007115158                                           | 4.975884522                          |
| 243.00799                                              | 0.926860025                             | 0.01641957                                            | 4.331565319                          |
| 258.8069698                                            | 0.964835165                             | 0.019937238                                           | 4.346995283                          |
| 413.4544016                                            | 0.891669086                             | 0.009654972                                           | 4.952902376                          |
| 201.5675094                                            | 0.945412944                             | 0.04437972                                            | 4.853742843                          |
| 212.8457743                                            | 0.883110041                             | 0.026687299                                           | 4.67123008                           |
| 261.3806148                                            | 0.889204439                             | 0.016761477                                           | 4.734179642                          |
| 232.2818091                                            | 0.891160338                             | 0.016217136                                           | 4.663779917                          |
| 496.9135968                                            | 0.95743387                              | 0.018583771                                           | 5.030616281                          |
| 402.8939027                                            | 0.924974696                             | 0.00978498                                            | 4.792346067                          |
| 278.9459929                                            | 0.95684803                              | 0.036700913                                           | 4.491234333                          |
| 251.458667                                             | 0.921859143                             | 0.020041379                                           | 4.522668069                          |
| 435.9932905                                            | 0.9244114                               | 0.007709683                                           | 4.932663965                          |

| log.sigma.3.5.mm.3D_glrIm_HighGrayLevelRunEmphasis | log.sigma.3.5.mm.3D_glrIm_RunLengthNonUniformityNormalized | log.sigma.3.5.mm.3D_glszm_GrayLevelVariance |
|----------------------------------------------------|------------------------------------------------------------|---------------------------------------------|
| 314.0234536                                        | 0.881817412                                                | 40.34323432                                 |
| 216.1448323                                        | 0.80078229                                                 | 31.03226596                                 |
| 137.0617048                                        | 0.893758417                                                | 24.34373961                                 |
| 332.480274                                         | 0.871954198                                                | 36.74996476                                 |
| 339.2814899                                        | 0.895223298                                                | 46.47533819                                 |
| 163.2279689                                        | 0.869922742                                                | 19.28669293                                 |
| 125.2568225                                        | 0.837057564                                                | 21.12177169                                 |
| 356.7305338                                        | 0.907552826                                                | 47.22132581                                 |
| 376.3784954                                        | 0.88259889                                                 | 46.09912248                                 |
| 203.2789102                                        | 0.836705252                                                | 28.1204363                                  |
| 240.4875364                                        | 0.883221037                                                | 24.51445937                                 |
| 215.6969467                                        | 0.858734293                                                | 35.45521338                                 |
| 163.3989299                                        | 0.846635149                                                | 30.29325255                                 |
| 183.4471893                                        | 0.876646941                                                | 26.47056095                                 |
| 207.4091305                                        | 0.863286999                                                | 30.99812696                                 |
| 205.1706969                                        | 0.697512201                                                | 26.56111315                                 |
| 251.8482324                                        | 0.893469312                                                | 32.68888426                                 |
| 180.1723683                                        | 0.856526826                                                | 33.76992781                                 |
| 299.3644274                                        | 0.895049018                                                | 42.02917492                                 |
| 119.5091554                                        | 0.790908868                                                | 21.44814152                                 |
| 242.5541934                                        | 0.791609097                                                | 21.89681373                                 |
| 189.849068                                         | 0.874808893                                                | 30.71850283                                 |
| 209.5671929                                        | 0.85179679                                                 | 26.41633645                                 |
| 391.5403156                                        | 0.877637866                                                | 38.0837603                                  |
| 125.3856811                                        | 0.841298315                                                | 20.72599435                                 |
| 226.174708                                         | 0.877536004                                                | 38.95127074                                 |
| 277.9166028                                        | 0.743994564                                                | 26.95139044                                 |
| 180.5957972                                        | 0.856245475                                                | 25.15800078                                 |
| 278.344244                                         | 0.89367574                                                 | 34.74383539                                 |
| 235.2840813                                        | 0.789320229                                                | 33.49584902                                 |
| 216.6670731                                        | 0.836612797                                                | 21.42395725                                 |
| 194.0978981                                        | 0.819220469                                                | 27.35800281                                 |
| 240.1106307                                        | 0.869654716                                                | 36.15821402                                 |
| 297.1870338                                        | 0.918533531                                                | 42.77366864                                 |
| 344.7236635                                        | 0.903252965                                                | 40.40362829                                 |
| 278.2367722                                        | 0.868853588                                                | 31.49374662                                 |
| 165.4545759                                        | 0.853634617                                                | 33.07942103                                 |
| 175.9767613                                        | 0.832754514                                                | 23.34923924                                 |
| 276.0740991                                        | 0.858856835                                                | 34.97037037                                 |
| 208.7905305                                        | 0.877458494                                                | 34.72745458                                 |
| 240.3569418                                        | 0.827689776                                                | 30.73925302                                 |
| 309.608445                                         | 0.889833071                                                | 39.65794407                                 |
| 260.4135323                                        | 0.887756642                                                | 31.65276258                                 |
| 295.4876516                                        | 0.891046046                                                | 45.17761798                                 |
| 315.3718643                                        | 0.870842315                                                | 32.78973267                                 |
| 88.80269604                                        | 0.813265653                                                | 15.72156586                                 |
| 245.1261485                                        | 0.864206168                                                | 31.86779117                                 |
| 181.4330178                                        | 0.884366686                                                | 28.2211467                                  |
| 407.6406773                                        | 0.908951088                                                | 44.0852071                                  |
| 431.8054025                                        | 0.890556917                                                | 58.54937105                                 |
| 195.2299876                                        | 0.830585578                                                | 26.69361733                                 |
| 194.7459795                                        | 0.873015268                                                | 24.32940034                                 |
| 286.3811587                                        | 0.841651                                                   | 35.622991                                   |
| 178.3096796                                        | 0.85126832                                                 | 24.45169454                                 |
| 151.0900292                                        | 0.769979246                                                | 26.05472957                                 |
| 268.9362009                                        | 0.898404094                                                | 45.68964258                                 |
| 374.0763333                                        | 0.902337635                                                | 43.18488396                                 |
| 362.3476906                                        | 0.876859229                                                | 44.01653381                                 |
| 219.5276123                                        | 0.862432218                                                | 31.12060909                                 |
| 151.763024                                         | 0.847768487                                                | 18.89765934                                 |
| 186.5312415                                        | 0.867728024                                                | 37.04758529                                 |
| 281.6815371                                        | 0.852994119                                                | 39.61664447                                 |
| 184.4140326                                        | 0.796316507                                                | 23.27344219                                 |
| 236.6435396                                        | 0.762235695                                                | 25.17789851                                 |
| 279.6039636                                        | 0.901904934                                                | 30.0314876                                  |
| 282.3581025                                        | 0.864032329                                                | 40.07602658                                 |
| 328.1141448                                        | 0.892357868                                                | 43.17805473                                 |
| 217.8235587                                        | 0.86611385                                                 | 36.84563251                                 |
| 215.8303516                                        | 0.892518983                                                | 29.5469596                                  |
| 204.0042965                                        | 0.872294972                                                | 34.01731995                                 |
| 256.19072                                          | 0.860742847                                                | 31.61074176                                 |
| 204.9454916                                        | 0.87937996                                                 | 35.02876383                                 |
| 166.0100535                                        | 0.815754646                                                | 26.85916199                                 |
| 260.9701935                                        | 0.799134631                                                | 21.77700381                                 |
| 249.5224646                                        | 0.7870928                                                  | 32.81624307                                 |
| 360.4606857                                        | 0.897738005                                                | 42.68945109                                 |
| 236.9704839                                        | 0.877016037                                                | 31.9684196                                  |
| 164.555653                                         | 0.887849377                                                | 32.16129754                                 |
| 286.8238878                                        | 0.878485395                                                | 34.44502771                                 |
| 226.9128248                                        | 0.859541329                                                | 26.51963185                                 |
| 352.9050531                                        | 0.902631555                                                | 51.79632069                                 |
| 353.011833                                         | 0.903715307                                                | 42.80959366                                 |
| 334.9705334                                        | 0.863539801                                                | 37.29362343                                 |
| 357.0106149                                        | 0.907711666                                                | 33.37017747                                 |
| 159.4657276                                        | 0.855708179                                                | 24.25750356                                 |
| 227.7315137                                        | 0.798923659                                                | 27.02724537                                 |
| 207.064618                                         | 0.894820977                                                | 36.17536506                                 |
| 442.5372343                                        | 0.902591524                                                | 44.21133372                                 |
| 197.2516185                                        | 0.866603306                                                | 24.5                                        |
| 234.8713948                                        | 0.935281991                                                | 28.89746094                                 |
| 293.4073622                                        | 0.824181289                                                | 39.63285568                                 |
| 178.5240097                                        | 0.898087462                                                | 41.17441766                                 |
| 148.0909846                                        | 0.805561509                                                | 25.91832201                                 |
| 182.2912182                                        | 0.817638362                                                | 27.13844041                                 |
| 167.7734784                                        | 0.816957261                                                | 23.72273695                                 |
| 435.3682986                                        | 0.91990936                                                 | 67.68738678                                 |
| 317.7606561                                        | 0.862070338                                                | 36.13878429                                 |
| 249.5075671                                        | 0.91616214                                                 | 31.10583104                                 |
| 195.6723294                                        | 0.859239481                                                | 23.9744352                                  |
| 358.0332015                                        | 0.863742509                                                | 51.36986416                                 |



| log.sigma.3.5.mm.3D_glszm_SmallAreaHighGrayLevelEmphasis | log.sigma.3.5.mm.3D_glszm_GrayLevelNonUniformityNormalized | log.sigma.3.5.mm.3D_glszm_SizeZoneNonUniformityNormalized |
|----------------------------------------------------------|------------------------------------------------------------|-----------------------------------------------------------|
| 253.1338568                                              | 0.04580161                                                 | 0.397446695                                               |
| 173.3716965                                              | 0.050029703                                                | 0.350807814                                               |
| 104.2704985                                              | 0.057285319                                                | 0.32199446                                                |
| 193.47876                                                | 0.045554531                                                | 0.330126596                                               |
| 219.8535566                                              | 0.042580645                                                | 0.372154006                                               |
| 109.9480667                                              | 0.064798463                                                | 0.31126162                                                |
| 93.4673957                                               | 0.064566116                                                | 0.24018595                                                |
| 267.6327782                                              | 0.041390273                                                | 0.405874877                                               |
| 256.0956825                                              | 0.04067077                                                 | 0.35028225                                                |
| 165.3806564                                              | 0.052463742                                                | 0.32380811                                                |
| 136.6535195                                              | 0.058545459                                                | 0.296692045                                               |
| 157.5207273                                              | 0.046728181                                                | 0.334494425                                               |
| 102.9410428                                              | 0.051033163                                                | 0.255809949                                               |
| 107.8350284                                              | 0.053763302                                                | 0.272475457                                               |
| 130.5496404                                              | 0.052047243                                                | 0.299812696                                               |
| 152.6210837                                              | 0.055102632                                                | 0.307615059                                               |
| 152.6611922                                              | 0.050195167                                                | 0.339743871                                               |
| 142.639872                                               | 0.04777137                                                 | 0.319984621                                               |
| 184.6589152                                              | 0.044282843                                                | 0.328658792                                               |
| 107.6591812                                              | 0.060242352                                                | 0.305636724                                               |
| 172.3742908                                              | 0.06071189                                                 | 0.304790296                                               |
| 125.0267603                                              | 0.051081608                                                | 0.305257131                                               |
| 165.146355                                               | 0.05547662                                                 | 0.324024956                                               |
| 227.2400645                                              | 0.048092869                                                | 0.363728621                                               |
| 107.6351653                                              | 0.062018585                                                | 0.330158165                                               |
| 184.5559611                                              | 0.045289855                                                | 0.316923966                                               |
| 189.7629804                                              | 0.054149197                                                | 0.285707779                                               |
| 160.466667                                               | 0.056858666                                                | 0.387882554                                               |
| 159.6334835                                              | 0.0462169                                                  | 0.364280654                                               |
| 199.163794                                               | 0.04856792                                                 | 0.363822035                                               |
| 168.4808152                                              | 0.061386719                                                | 0.318678385                                               |
| 141.3596491                                              | 0.053107155                                                | 0.302336548                                               |
| 142.9095264                                              | 0.046196722                                                | 0.308805192                                               |
| 188.4889968                                              | 0.048816568                                                | 0.354289941                                               |
| 226.5885704                                              | 0.045805262                                                | 0.3953856                                                 |
| 153.3944899                                              | 0.04901298                                                 | 0.279179624                                               |
| 142.3271488                                              | 0.049355516                                                | 0.35333547                                                |
| 112.1084566                                              | 0.057021074                                                | 0.286235453                                               |
| 155.2875837                                              | 0.049657064                                                | 0.276241427                                               |
| 151.2278724                                              | 0.0471213                                                  | 0.326136582                                               |
| 160.0734966                                              | 0.051383849                                                | 0.309482174                                               |
| 220.5999258                                              | 0.04526517                                                 | 0.353752083                                               |
| 162.2980452                                              | 0.048985776                                                | 0.335470265                                               |
| 205.6327801                                              | 0.04203912                                                 | 0.320321511                                               |
| 200.5476033                                              | 0.048340534                                                | 0.313709566                                               |
| 76.74092423                                              | 0.069753918                                                | 0.282929324                                               |
| 163.5809514                                              | 0.048520149                                                | 0.313294653                                               |
| 140.4652065                                              | 0.053247622                                                | 0.353411118                                               |
| 237.7782482                                              | 0.046153846                                                | 0.365680473                                               |
| 266.6889191                                              | 0.038437303                                                | 0.342808467                                               |
| 131.5303942                                              | 0.054492762                                                | 0.269092457                                               |
| 124.7290816                                              | 0.057979493                                                | 0.347225748                                               |
| 205.4551919                                              | 0.046568676                                                | 0.345236633                                               |
| 116.1792855                                              | 0.055983038                                                | 0.264594234                                               |
| 118.5909044                                              | 0.055333788                                                | 0.33118922                                                |
| 183.9198482                                              | 0.041434618                                                | 0.354520928                                               |
| 274.8051676                                              | 0.042370688                                                | 0.409618789                                               |
| 225.0519041                                              | 0.043233002                                                | 0.361219067                                               |
| 163.9326986                                              | 0.049178185                                                | 0.366554477                                               |
| 89.13406869                                              | 0.066921534                                                | 0.2705534                                                 |
| 153.6196981                                              | 0.045240591                                                | 0.325971477                                               |
| 194.8896552                                              | 0.04601831                                                 | 0.337249867                                               |
| 134.4769834                                              | 0.059014453                                                | 0.308442321                                               |
| 158.4646469                                              | 0.054638833                                                | 0.293688532                                               |
| 206.0302145                                              | 0.054214876                                                | 0.403471074                                               |
| 190.7355845                                              | 0.045508084                                                | 0.325623636                                               |
| 248.1262653                                              | 0.047479034                                                | 0.373383675                                               |
| 168.3452257                                              | 0.045618147                                                | 0.356068053                                               |
| 162.3299271                                              | 0.053727613                                                | 0.345949604                                               |
| 161.0736724                                              | 0.047923765                                                | 0.351327374                                               |
| 192.0652244                                              | 0.048991024                                                | 0.342986802                                               |
| 149.2083474                                              | 0.046557295                                                | 0.333912834                                               |
| 139.8400648                                              | 0.05425276                                                 | 0.316301268                                               |
| 191.3832859                                              | 0.059963851                                                | 0.310911708                                               |
| 164.2942149                                              | 0.049348443                                                | 0.306160436                                               |
| 225.427323                                               | 0.043314256                                                | 0.351676314                                               |
| 142.5600066                                              | 0.050497405                                                | 0.308727413                                               |
| 131.6136618                                              | 0.051445268                                                | 0.368047584                                               |
| 203.7217187                                              | 0.047423645                                                | 0.350780774                                               |
| 155.6934909                                              | 0.054591978                                                | 0.315644104                                               |
| 282.447877                                               | 0.039888256                                                | 0.387247821                                               |
| 234.3406101                                              | 0.042479339                                                | 0.389100092                                               |
| 220.5232837                                              | 0.045242173                                                | 0.34805225                                                |
| 222.6353188                                              | 0.05632716                                                 | 0.392361111                                               |
| 121.464285                                               | 0.056078676                                                | 0.321354575                                               |
| 168.8098447                                              | 0.054362349                                                | 0.308571152                                               |
| 162.731718                                               | 0.047187669                                                | 0.364572066                                               |
| 283.5211375                                              | 0.042924797                                                | 0.368223882                                               |
| 147.2455006                                              | 0.068847656                                                | 0.379394531                                               |
| 194.367474                                               | 0.059082031                                                | 0.471679688                                               |
| 212.9062646                                              | 0.044137279                                                | 0.329339941                                               |
| 161.7437141                                              | 0.043818593                                                | 0.399922445                                               |
| 93.15430052                                              | 0.054081763                                                | 0.309218677                                               |
| 121.2177453                                              | 0.053262057                                                | 0.290942114                                               |
| 119.4363404                                              | 0.057374357                                                | 0.295314552                                               |
| 315.7459067                                              | 0.037523938                                                | 0.427565861                                               |
| 178.4022374                                              | 0.046114724                                                | 0.320281894                                               |
| 184.1945297                                              | 0.058769513                                                | 0.404499541                                               |
| 95.59850807                                              | 0.061236623                                                | 0.252972652                                               |
| 323.336835                                               | 0.040688723                                                | 0.422440067                                               |

| log.sigma.3.5.mm.3D_glszm_SizeZoneNonUniformity | log.sigma.3.5.mm.3D_glszm_GrayLevelNonUniformity | log.sigma.3.5.mm.3D_glszm_LargeAreaEmphasis | log.sigma.3.5.mm.3D_glszm_ZoneVariance |
|-------------------------------------------------|--------------------------------------------------|---------------------------------------------|----------------------------------------|
| 120.4257426                                     | 13.87788779                                      | 14.99669967                                 | 9.567645873                            |
| 205.5733788                                     | 29.31740614                                      | 144.5819113                                 | 132.0193625                            |
| 61.17894737                                     | 10.88421053                                      | 9.547368421                                 | 4.329750693                            |
| 327.81571                                       | 45.23564955                                      | 21.96475327                                 | 14.92329286                            |
| 57.68387097                                     | 6.6                                              | 13.16774194                                 | 7.803288241                            |
| 70.65638767                                     | 14.7092511                                       | 21.94273128                                 | 13.91911351                            |
| 21.13636364                                     | 5.681818182                                      | 35.28409091                                 | 20.61867252                            |
| 203.3433134                                     | 20.73652695                                      | 7.329341317                                 | 3.29341317                             |
| 291.785114                                      | 33.8787515                                       | 17.94357743                                 | 11.71456818                            |
| 295.9606127                                     | 47.95185996                                      | 69.51203501                                 | 58.02334701                            |
| 89.89768977                                     | 17.73927393                                      | 17.46864686                                 | 10.01917023                            |
| 170.5921569                                     | 23.83137255                                      | 27.74117647                                 | 19.29702422                            |
| 143.2535714                                     | 28.57857143                                      | 52.33571429                                 | 38.61927296                            |
| 107.3553299                                     | 21.18274112                                      | 19.88324873                                 | 11.83148239                            |
| 96.23987539                                     | 16.70716511                                      | 27.38629283                                 | 19.33201347                            |
| 319.3044316                                     | 57.19653179                                      | 3388.817919                                 | 3344.025977                            |
| 102.602649                                      | 15.1589404                                       | 10.29139073                                 | 4.9494759                              |
| 244.7882353                                     | 36.54509804                                      | 49.39869281                                 | 40.10615746                            |
| 86.43726236                                     | 11.64638783                                      | 8.72243346                                  | 3.825384204                            |
| 188.8834951                                     | 37.22977346                                      | 213.5032362                                 | 192.9609268                            |
| 370.625                                         | 73.82565789                                      | 339.9292763                                 | 321.4732081                            |
| 195.9750779                                     | 32.79439252                                      | 17.34267913                                 | 10.16495376                            |
| 292.27051                                       | 50.03991131                                      | 45.59534368                                 | 36.42827838                            |
| 73.10945274                                     | 9.666666667                                      | 14.00497512                                 | 8.278359447                            |
| 126.1204188                                     | 23.69109948                                      | 58.54973822                                 | 48.61569036                            |
| 87.47101449                                     | 12.5                                             | 16.02898551                                 | 9.706311699                            |
| 193.9955817                                     | 36.76730486                                      | 537.5287187                                 | 511.4721294                            |
| 197.43222                                       | 28.9410609                                       | 42.34774067                                 | 34.42169051                            |
| 280.4961039                                     | 35.58701299                                      | 12.27142857                                 | 7.017212009                            |
| 256.8583569                                     | 34.28895184                                      | 179.2011331                                 | 166.2370535                            |
| 305.93125                                       | 58.93125                                         | 91.01979167                                 | 80.05403537                            |
| 504.2973621                                     | 88.58273381                                      | 82.74220624                                 | 70.10307294                            |
| 228.2070365                                     | 34.13937754                                      | 20.69418133                                 | 13.12609843                            |
| 18.42307692                                     | 2.538461538                                      | 6.192307692                                 | 2.192307692                            |
| 64.44785276                                     | 7.466257669                                      | 7.926380368                                 | 3.777786142                            |
| 192.0755814                                     | 33.72093023                                      | 20.86918605                                 | 12.24881693                            |
| 334.9620253                                     | 46.78902954                                      | 50.80168776                                 | 41.57239759                            |
| 261.3329682                                     | 52.06024096                                      | 104.3986857                                 | 90.90332294                            |
| 74.58518519                                     | 13.40740741                                      | 25.04814815                                 | 15.4840192                             |
| 133.0637255                                     | 19.2254902                                       | 17.55637255                                 | 10.94592825                            |
| 129.673031                                      | 21.52983294                                      | 79.3221957                                  | 66.94657697                            |
| 142.9158416                                     | 18.28712871                                      | 13.13118812                                 | 7.566727527                            |
| 219.3975535                                     | 32.03669725                                      | 15.85321101                                 | 9.549579628                            |
| 130.6911765                                     | 17.15196078                                      | 14.29656863                                 | 7.985143935                            |
| 207.9894419                                     | 32.04977376                                      | 26.13273002                                 | 18.10922517                            |
| 154.76234                                       | 38.15539305                                      | 143.1480804                                 | 126.5577239                            |
| 465.5558546                                     | 72.10094213                                      | 31.33243607                                 | 23.09097743                            |
| 81.99137931                                     | 12.35344828                                      | 15.7112069                                  | 9.396384512                            |
| 23.76923077                                     | 3                                                | 7.323076923                                 | 3.073136095                            |
| 70.96135266                                     | 7.956521739                                      | 14.0821256                                  | 8.317486989                            |
| 258.8669439                                     | 52.42203742                                      | 70.8004158                                  | 58.13214414                            |
| 104.5149502                                     | 17.45182724                                      | 31.55813953                                 | 24.00933765                            |
| 440.5219436                                     | 59.42163009                                      | 51.57601881                                 | 42.60890407                            |
| 45.24561404                                     | 9.573099415                                      | 31.71345029                                 | 19.76854417                            |
| 456.7099347                                     | 76.30529369                                      | 861.5902828                                 | 839.2151189                            |
| 142.5174129                                     | 16.65671642                                      | 9.997512438                                 | 5.216436474                            |
| 431.328585                                      | 44.61633428                                      | 9.320987654                                 | 4.983677081                            |
| 183.1380671                                     | 21.91913215                                      | 23.04733728                                 | 16.54332831                            |
| 111.0660066                                     | 14.9009901                                       | 26.71287129                                 | 19.4957575                             |
| 62.4978355                                      | 15.45887446                                      | 55.05194805                                 | 40.50647477                            |
| 245.7824934                                     | 34.11140584                                      | 32.72546419                                 | 24.82742614                            |
| 643.4727463                                     | 87.80293501                                      | 46.49371069                                 | 38.25067244                            |
| 209.1238938                                     | 40.01179941                                      | 396.4572271                                 | 375.6862192                            |
| 157.1233645                                     | 29.2317757                                       | 465.9719626                                 | 439.9142772                            |
| 44.38181818                                     | 5.963636364                                      | 6.5                                         | 2.608347107                            |
| 184.9542254                                     | 25.84859155                                      | 31.50528169                                 | 24.02967851                            |
| 64.59537572                                     | 8.213872832                                      | 11.19075145                                 | 6.003942664                            |
| 409.4782609                                     | 52.46086957                                      | 35.83391304                                 | 28.10551304                            |
| 67.80612245                                     | 10.53061224                                      | 11.52040816                                 | 6.342461474                            |
| 270.5220779                                     | 36.9012987                                       | 23.98311688                                 | 17.16220105                            |
| 370.7687327                                     | 52.95929695                                      | 34.63644773                                 | 26.7279175                             |
| 145.9199085                                     | 20.34553776                                      | 16.83981693                                 | 10.16522053                            |
| 438.0772563                                     | 75.1400722                                       | 153.6418773                                 | 139.718472                             |
| 484.7113534                                     | 93.48364336                                      | 229.5202053                                 | 210.9622918                            |
| 677.8392051                                     | 109.2574526                                      | 906.8437218                                 | 889.6515742                            |
| 174.4314516                                     | 21.48387097                                      | 11.09274194                                 | 6.030241935                            |
| 125.9607843                                     | 20.60294118                                      | 20.06127451                                 | 12.56602629                            |
| 95.32432432                                     | 13.32432432                                      | 14.64092664                                 | 9.093901403                            |
| 241.6879536                                     | 32.67489115                                      | 19.54716981                                 | 12.99238079                            |
| 313.1189516                                     | 54.15524194                                      | 28.52620968                                 | 20.29532632                            |
| 97.19920319                                     | 10.01195219                                      | 7.61752988                                  | 3.585593879                            |
| 256.8060606                                     | 28.03636364                                      | 8.213636364                                 | 4.08535124                             |
| 359.1899225                                     | 46.68992248                                      | 37.23837209                                 | 29.91904032                            |
| 28.25                                           | 4.055555556                                      | 8.125                                       | 4.069251543                            |
| 340.6358491                                     | 59.44339623                                      | 45.10283019                                 | 34.86886703                            |
| 384.1710843                                     | 67.6811245                                       | 390.0240964                                 | 370.6782304                            |
| 125.4127907                                     | 16.23255814                                      | 12.61627907                                 | 7.50131828                             |
| 267.698762                                      | 31.20632737                                      | 8.715268226                                 | 4.157894836                            |
| 24.28125                                        | 4.40625                                          | 21.640625                                   | 13.46459961                            |
| 30.1875                                         | 3.78125                                          | 3.890625                                    | 1.198974609                            |
| 394.5492487                                     | 52.87646077                                      | 190.8288815                                 | 179.8195581                            |
| 133.1741742                                     | 14.59159159                                      | 11.29129129                                 | 6.796381968                            |
| 94.62091503                                     | 16.54901961                                      | 65.28104575                                 | 54.12631894                            |
| 324.1095153                                     | 59.33393178                                      | 147.021544                                  | 133.5419679                            |
| 420.2326072                                     | 81.64371047                                      | 242.9739986                                 | 226.3266811                            |
| 59.43165468                                     | 5.215827338                                      | 5.330935252                                 | 2.01801149                             |
| 137.4009324                                     | 19.78321678                                      | 35.97202797                                 | 27.93764433                            |
| 26.6969697                                      | 3.878787879                                      | 5.5                                         | 2.026859504                            |
| 29.34482759                                     | 7.103448276                                      | 24.52586207                                 | 13.85099584                            |
| 130.5339806                                     | 12.57281553                                      | 27.5566343                                  | 20.73591605                            |

| log.sigma.3.5.mm.3D_glszm_ZonePercentage | log.sigma.3.5.mm.3D_glszm_LargeAreaLowGrayLevelEmphasis | log.sigma.3.5.mm.3D_glszm_LargeAreaHighGrayLevelEmphasis | log.sigma.3.5.mm.3D_glszm_HighGrayLevelZoneEmphasis |
|------------------------------------------|---------------------------------------------------------|----------------------------------------------------------|-----------------------------------------------------|
| 0.42917847                               | 0.114839605                                             | 3454.970297                                              | 364.3432343                                         |
| 0.282137699                              | 0.865718034                                             | 28139.36519                                              | 262.5290102                                         |
| 0.437788018                              | 0.343586609                                             | 962.1526316                                              | 161.9736842                                         |
| 0.376850095                              | 0.098364614                                             | 7350.015106                                              | 328.4612286                                         |
| 0.431754875                              | 0.094220647                                             | 4334.574194                                              | 344.316129                                          |
| 0.353032659                              | 0.365566674                                             | 2516.378855                                              | 183.1718062                                         |
| 0.261127596                              | 0.567451151                                             | 3666.886364                                              | 157.8522727                                         |
| 0.5                                      | 0.051532908                                             | 2473.471058                                              | 384.4311377                                         |
| 0.400673401                              | 0.084793306                                             | 5715.920768                                              | 405.0492197                                         |
| 0.295029051                              | 0.636664712                                             | 9668.685996                                              | 260.4660832                                         |
| 0.366384522                              | 0.152537275                                             | 3675.633663                                              | 248.9207921                                         |
| 0.344129555                              | 0.285910116                                             | 4467.121569                                              | 255.3666667                                         |
| 0.270009643                              | 0.819235453                                             | 6074.214286                                              | 189.8642857                                         |
| 0.352415027                              | 0.363049481                                             | 3439.086294                                              | 197.5888325                                         |
| 0.352360044                              | 0.25758231                                              | 4663.158879                                              | 233.4174455                                         |
| 0.149417015                              | 19.54054348                                             | 597809.2023                                              | 253.7630058                                         |
| 0.432664756                              | 0.15186912                                              | 2435.708609                                              | 256.0033113                                         |
| 0.328044597                              | 1.226262583                                             | 4701.397386                                              | 232.8196078                                         |
| 0.451890034                              | 0.203876621                                             | 2324.498099                                              | 313.7148289                                         |
| 0.220635487                              | 4.15668891                                              | 18535.28479                                              | 168.0226537                                         |
| 0.232771822                              | 1.786449206                                             | 68143.84375                                              | 295.9136513                                         |
| 0.373255814                              | 0.24484122                                              | 2546.579439                                              | 211.7928349                                         |
| 0.330281948                              | 0.423540451                                             | 6407.68071                                               | 262.559867                                          |
| 0.417879418                              | 0.051887933                                             | 6165.40796                                               | 372.3731343                                         |
| 0.317275748                              | 0.9149621                                               | 4699.722513                                              | 163.7225131                                         |
| 0.397694524                              | 0.200221777                                             | 2548.032609                                              | 282.1304348                                         |
| 0.195903058                              | 2.244158494                                             | 132895.5685                                              | 335.8100147                                         |
| 0.355198883                              | 0.482624911                                             | 5032.554028                                              | 233.6738703                                         |
| 0.436260623                              | 0.101753299                                             | 3665.867532                                              | 266.0207792                                         |
| 0.277734068                              | 0.864541244                                             | 41915.52125                                              | 292.1770538                                         |
| 0.301981755                              | 0.773083026                                             | 12128.35938                                              | 271.096875                                          |
| 0.281281619                              | 0.818166939                                             | 11833.39149                                              | 234.9736211                                         |
| 0.363502213                              | 0.198252143                                             | 4651.2341                                                | 250.0933694                                         |
| 0.5                                      | 0.112884275                                             | 1703.461538                                              | 307.4615385                                         |
| 0.490963855                              | 0.055372655                                             | 2680.300613                                              | 349.3435583                                         |
| 0.340594059                              | 0.134297858                                             | 5688.805233                                              | 283.2325581                                         |
| 0.329166667                              | 0.872665924                                             | 4960.546414                                              | 212.0970464                                         |
| 0.272212284                              | 1.044284599                                             | 16145.28149                                              | 199.3110624                                         |
| 0.323353293                              | 0.154094664                                             | 7107.3                                                   | 280.4148148                                         |
| 0.388941849                              | 0.27434411                                              | 2938.45098                                               | 238.4191176                                         |
| 0.284260516                              | 0.459814585                                             | 16498.3747                                               | 272.5083532                                         |
| 0.423924449                              | 0.125301943                                             | 3144.985149                                              | 339.6163366                                         |
| 0.398294762                              | 0.145812384                                             | 3719.25841                                               | 265.0321101                                         |
| 0.39804878                               | 0.133244249                                             | 3782.039216                                              | 329.2818627                                         |
| 0.353035144                              | 0.11990494                                              | 7794.662142                                              | 336.2745098                                         |
| 0.24551167                               | 4.210830473                                             | 6910.586837                                              | 129.2394881                                         |
| 0.348335677                              | 0.200209156                                             | 6794.185734                                              | 270.9925976                                         |
| 0.397941681                              | 0.535236631                                             | 1808.577586                                              | 213.3922414                                         |
| 0.485074627                              | 0.084184163                                             | 3130.861538                                              | 396.3692308                                         |
| 0.416498994                              | 0.076362618                                             | 6148.661836                                              | 439.2705314                                         |
| 0.280957944                              | 0.577218608                                             | 11539.10915                                              | 234.8087318                                         |
| 0.363966143                              | 0.900905763                                             | 3663.61794                                               | 207.0730897                                         |
| 0.333943994                              | 0.276542665                                             | 12238.44671                                              | 324.8628527                                         |
| 0.289340102                              | 0.420589398                                             | 5134.269006                                              | 202.8538012                                         |
| 0.211405795                              | 7.771372834                                             | 112543.2879                                              | 190.4670051                                         |
| 0.457337884                              | 0.117608319                                             | 2218.238806                                              | 289.5                                               |
| 0.480164159                              | 0.057225059                                             | 3094.817664                                              | 399.6163343                                         |
| 0.392111369                              | 0.098244405                                             | 9174.039448                                              | 356.964497                                          |
| 0.372235872                              | 0.242713656                                             | 4474.858086                                              | 258.2046205                                         |
| 0.262202043                              | 0.881939565                                             | 6711.380952                                              | 172.6147186                                         |
| 0.355828221                              | 0.642323146                                             | 3113.6313                                                | 238.3938992                                         |
| 0.3483023                                | 0.245306647                                             | 11701.04874                                              | 309.0031447                                         |
| 0.219417476                              | 2.587074015                                             | 66973.10324                                              | 220.6386431                                         |
| 0.195898938                              | 2.163242207                                             | 105878.2411                                              | 276.0598131                                         |
| 0.506912442                              | 0.069643153                                             | 1601.290909                                              | 301.6818182                                         |
| 0.365743722                              | 0.162094732                                             | 7924.213028                                              | 314.6549296                                         |
| 0.439086294                              | 0.124078205                                             | 3539.236994                                              | 358.4971098                                         |
| 0.35971223                               | 0.721419981                                             | 5465.423478                                              | 259.2704348                                         |
| 0.439461883                              | 0.306655384                                             | 1694.280612                                              | 247.5612245                                         |
| 0.382894083                              | 0.302140148                                             | 3435.002597                                              | 241.1155844                                         |
| 0.355592105                              | 0.301419075                                             | 6043.823312                                              | 302.8390379                                         |
| 0.387068202                              | 0.394561132                                             | 2540.672769                                              | 233.8581236                                         |
| 0.267995356                              | 1.529806861                                             | 21259.2917                                               | 217.6779783                                         |
| 0.232132222                              | 1.197872978                                             | 50610.89609                                              | 319.0795382                                         |
| 0.241176471                              | 4.03074166                                              | 208271.7986                                              | 279.7773261                                         |
| 0.444444444                              | 0.064980725                                             | 3806.540323                                              | 366.9798387                                         |
| 0.3652641                                | 0.165391675                                             | 4361.367647                                              | 248.1593137                                         |
| 0.424590164                              | 0.820513417                                             | 1283.752896                                              | 198.7606178                                         |
| 0.390589569                              | 0.158597941                                             | 4355.047896                                              | 318.7271408                                         |
| 0.348559382                              | 0.237531247                                             | 4759.558468                                              | 258.9284274                                         |
| 0.498015873                              | 0.08885964                                              | 1929.151394                                              | 408.5697211                                         |
| 0.492170022                              | 0.048122476                                             | 2948.762121                                              | 354.9742424                                         |
| 0.369627507                              | 0.148153785                                             | 11588.16764                                              | 354.6996124                                         |
| 0.496551724                              | 0.046457615                                             | 2795.430556                                              | 359.875                                             |
| 0.312592156                              | 0.699266437                                             | 5108.724528                                              | 193.4292453                                         |
| 0.227355734                              | 2.33249834                                              | 69037.249                                                | 280.7959839                                         |
| 0.442159383                              | 0.279460057                                             | 1640.107558                                              | 244.4069767                                         |
| 0.468427835                              | 0.051010919                                             | 3833.086657                                              | 447.9614856                                         |
| 0.349726776                              | 0.188183228                                             | 3565.46875                                               | 220.5                                               |
| 0.60952381                               | 0.053682909                                             | 802.953125                                               | 256.71875                                           |
| 0.301383648                              | 0.777337794                                             | 51323.6202                                               | 338.6803005                                         |
| 0.471671388                              | 0.470374183                                             | 1091.045045                                              | 222.8168168                                         |
| 0.299412916                              | 0.685522526                                             | 8606.405229                                              | 165.4052288                                         |
| 0.272371638                              | 1.196302555                                             | 23582.95691                                              | 211.9910233                                         |
| 0.245091285                              | 1.927062029                                             | 39269.01124                                              | 205.5839775                                         |
| 0.549407115                              | 0.079116995                                             | 2262.683453                                              | 452.8633094                                         |
| 0.352796053                              | 0.149096874                                             | 12473.48718                                              | 312.2097902                                         |
| 0.536585366                              | 0.159639306                                             | 1202.909091                                              | 266.6818182                                         |
| 0.306068602                              | 0.26001947                                              | 5094.801724                                              | 187.6379371                                         |
| 0.382899628                              | 0.130661576                                             | 7356.563107                                              | 441.0809061                                         |

| log.sigma.3.5.mm.3D_glszm_SmallAreaEmphasis | log.sigma.3.5.mm.3D_glszm_LowGrayLevelZoneEmphasis | log.sigma.3.5.mm.3D_glszm_ZoneEntropy | log.sigma.3.5.mm.3D_glszm_SmallAreaLowGrayLevelEmphasis |
|---------------------------------------------|----------------------------------------------------|---------------------------------------|---------------------------------------------------------|
| 0.654298314                                 | 0.008809599                                        | 6.167478305                           | 0.006626725                                             |
| 0.614536237                                 | 0.011681384                                        | 6.383398537                           | 0.008142905                                             |
| 0.578885507                                 | 0.02685716                                         | 5.910972469                           | 0.012723359                                             |
| 0.592180871                                 | 0.007519548                                        | 6.653797889                           | 0.004770936                                             |
| 0.631097811                                 | 0.015160548                                        | 6.055540274                           | 0.01110606                                              |
| 0.575169228                                 | 0.016878                                           | 5.910859119                           | 0.010484974                                             |
| 0.500656555                                 | 0.027842759                                        | 5.692093125                           | 0.009750686                                             |
| 0.661757597                                 | 0.008622948                                        | 6.339122535                           | 0.006368974                                             |
| 0.611888003                                 | 0.006251321                                        | 6.674178683                           | 0.004145635                                             |
| 0.587834603                                 | 0.008968191                                        | 6.556268906                           | 0.004193404                                             |
| 0.558840014                                 | 0.011436666                                        | 6.163326657                           | 0.007906295                                             |
| 0.597538866                                 | 0.011998724                                        | 6.499555331                           | 0.007657728                                             |
| 0.513374116                                 | 0.021122711                                        | 6.716080351                           | 0.012291642                                             |
| 0.528507275                                 | 0.018759553                                        | 6.426685035                           | 0.007888008                                             |
| 0.548530196                                 | 0.014011847                                        | 6.257086719                           | 0.008975984                                             |
| 0.570298944                                 | 0.008547041                                        | 6.593766378                           | 0.003982432                                             |
| 0.601547168                                 | 0.013036678                                        | 6.179410433                           | 0.00818299                                              |
| 0.579850413                                 | 0.014019846                                        | 6.53857705                            | 0.005951508                                             |
| 0.580818731                                 | 0.0163004                                          | 6.295892099                           | 0.011485613                                             |
| 0.570785656                                 | 0.016728882                                        | 6.370073148                           | 0.007679653                                             |
| 0.566425836                                 | 0.006059366                                        | 6.503371939                           | 0.003792549                                             |
| 0.566651187                                 | 0.015210527                                        | 6.493395046                           | 0.009294011                                             |
| 0.585090413                                 | 0.008568995                                        | 6.438563889                           | 0.005075728                                             |
| 0.624606511                                 | 0.011550606                                        | 6.078304782                           | 0.009764175                                             |
| 0.592997468                                 | 0.017195831                                        | 6.079440523                           | 0.010082635                                             |
| 0.575419556                                 | 0.013331016                                        | 6.326824053                           | 0.006198932                                             |
| 0.545942166                                 | 0.006254998                                        | 6.594065077                           | 0.00413319                                              |
| 0.646532993                                 | 0.010324767                                        | 6.076098309                           | 0.006866064                                             |
| 0.623560652                                 | 0.011698225                                        | 6.362888907                           | 0.007990837                                             |
| 0.625419244                                 | 0.008595289                                        | 6.397277714                           | 0.005111157                                             |
| 0.582168476                                 | 0.00681893                                         | 6.38055954                            | 0.004023276                                             |
| 0.565320554                                 | 0.010890611                                        | 6.73698325                            | 0.006007508                                             |
| 0.568420762                                 | 0.015131762                                        | 6.628927443                           | 0.008200445                                             |
| 0.610095827                                 | 0.025750822                                        | 5.147461112                           | 0.008971892                                             |
| 0.651270503                                 | 0.014405704                                        | 5.902079575                           | 0.011691157                                             |
| 0.538824049                                 | 0.009212462                                        | 6.677865758                           | 0.00572293                                              |
| 0.615379506                                 | 0.01998219                                         | 6.513174486                           | 0.010848946                                             |
| 0.550091731                                 | 0.014504777                                        | 6.60486053                            | 0.008908378                                             |
| 0.528429757                                 | 0.01686535                                         | 6.431279861                           | 0.011586756                                             |
| 0.586615817                                 | 0.015700803                                        | 6.391345749                           | 0.010170866                                             |
| 0.571153613                                 | 0.010184087                                        | 6.409805467                           | 0.006504702                                             |
| 0.615974678                                 | 0.009419127                                        | 6.366317965                           | 0.005043058                                             |
| 0.597599142                                 | 0.010750947                                        | 6.430620989                           | 0.006877512                                             |
| 0.579161818                                 | 0.012253414                                        | 6.538035874                           | 0.007799321                                             |
| 0.576711657                                 | 0.007067662                                        | 6.566050078                           | 0.004801693                                             |
| 0.544356564                                 | 0.021203307                                        | 6.211541654                           | 0.010285051                                             |
| 0.576118302                                 | 0.008901028                                        | 6.727082139                           | 0.005363525                                             |
| 0.615599745                                 | 0.021769526                                        | 6.046323138                           | 0.013008807                                             |
| 0.606185767                                 | 0.020168365                                        | 5.275762813                           | 0.007116666                                             |
| 0.602676855                                 | 0.013239565                                        | 6.264406132                           | 0.009738465                                             |
| 0.530302758                                 | 0.010298726                                        | 6.738558879                           | 0.005014198                                             |
| 0.609779362                                 | 0.015910039                                        | 5.972214804                           | 0.008389207                                             |
| 0.608713325                                 | 0.006729278                                        | 6.6869481                             | 0.004307702                                             |
| 0.52666089                                  | 0.018006689                                        | 6.070370203                           | 0.010516865                                             |
| 0.595603122                                 | 0.014949272                                        | 6.569231598                           | 0.008534946                                             |
| 0.612549861                                 | 0.018624339                                        | 6.426777703                           | 0.014009356                                             |
| 0.665028706                                 | 0.007167023                                        | 6.433492869                           | 0.005174386                                             |
| 0.62365426                                  | 0.013625912                                        | 6.538990375                           | 0.009795658                                             |
| 0.620044238                                 | 0.012592432                                        | 6.044014436                           | 0.008560147                                             |
| 0.533701995                                 | 0.018950105                                        | 6.124343719                           | 0.013479925                                             |
| 0.587447618                                 | 0.017803284                                        | 6.587253568                           | 0.009588394                                             |
| 0.600095685                                 | 0.007669331                                        | 6.79825527                            | 0.004639877                                             |
| 0.572547233                                 | 0.009909888                                        | 6.42563654                            | 0.005912551                                             |
| 0.555885662                                 | 0.008065098                                        | 6.479837337                           | 0.00541393                                              |
| 0.659049642                                 | 0.015878672                                        | 5.537339805                           | 0.013019525                                             |
| 0.585373632                                 | 0.008766246                                        | 6.600010795                           | 0.004778961                                             |
| 0.632634943                                 | 0.015471344                                        | 6.049206139                           | 0.006501613                                             |
| 0.617918465                                 | 0.013313013                                        | 6.584554584                           | 0.008306429                                             |
| 0.603030225                                 | 0.016570922                                        | 5.928022952                           | 0.010822874                                             |
| 0.613894521                                 | 0.015358259                                        | 6.517344285                           | 0.008919276                                             |
| 0.605304383                                 | 0.007226296                                        | 6.511466808                           | 0.003530427                                             |
| 0.597469812                                 | 0.01596473                                         | 6.413516829                           | 0.007099875                                             |
| 0.581616383                                 | 0.01067457                                         | 6.626039859                           | 0.00575773                                              |
| 0.573646002                                 | 0.005339203                                        | 6.514161404                           | 0.003178858                                             |
| 0.568043997                                 | 0.007951923                                        | 6.840151346                           | 0.004793729                                             |
| 0.612054289                                 | 0.008912272                                        | 6.440619788                           | 0.00640862                                              |
| 0.571155299                                 | 0.014782236                                        | 6.440474002                           | 0.01054188                                              |
| 0.628412708                                 | 0.027255495                                        | 6.018268201                           | 0.013637367                                             |
| 0.613899315                                 | 0.011494389                                        | 6.446571708                           | 0.007227524                                             |
| 0.577876868                                 | 0.008568558                                        | 6.46970605                            | 0.005040665                                             |
| 0.642437005                                 | 0.018722205                                        | 6.172091166                           | 0.016145562                                             |
| 0.645753432                                 | 0.009670212                                        | 6.36744053                            | 0.007103505                                             |
| 0.6111789                                   | 0.006433911                                        | 6.646950027                           | 0.004338678                                             |
| 0.635761827                                 | 0.019561899                                        | 5.290977605                           | 0.0178365                                               |
| 0.58678264                                  | 0.015610894                                        | 6.494045647                           | 0.00863936                                              |
| 0.570953946                                 | 0.007348441                                        | 6.602680421                           | 0.004374758                                             |
| 0.621856457                                 | 0.014062243                                        | 6.180121894                           | 0.006416964                                             |
| 0.626741867                                 | 0.006655415                                        | 6.461635048                           | 0.004617686                                             |
| 0.638158402                                 | 0.025201373                                        | 4.951008939                           | 0.022296117                                             |
| 0.713624132                                 | 0.024038238                                        | 5.052668899                           | 0.021653541                                             |
| 0.590790317                                 | 0.007805673                                        | 6.769624596                           | 0.004104042                                             |
| 0.652723638                                 | 0.030339533                                        | 6.09239284                            | 0.012804851                                             |
| 0.569609239                                 | 0.028339396                                        | 6.24735393                            | 0.018294446                                             |
| 0.551345                                    | 0.01544459                                         | 6.661942412                           | 0.009194072                                             |
| 0.553947886                                 | 0.011557216                                        | 6.583893372                           | 0.006374325                                             |
| 0.678278144                                 | 0.014202795                                        | 5.930936152                           | 0.006107872                                             |
| 0.583417289                                 | 0.009561429                                        | 6.50158398                            | 0.005150485                                             |
| 0.657673611                                 | 0.026270728                                        | 5.186376082                           | 0.009301487                                             |
| 0.512598688                                 | 0.022725826                                        | 5.848693009                           | 0.015789094                                             |
| 0.67298023                                  | 0.008547739                                        | 6.218036757                           | 0.006635628                                             |

| log.sigma.3.5.mm.3D_ngtdm_Coarseness | log.sigma.3.5.mm.3D_ngtdm_Complexity | log.sigma.3.5.mm.3D_ngtdm_Strength | log.sigma.3.5.mm.3D_ngtdm_Busyness | log.sigma.3.5.mm.3D_ngtdm_Contrast |
|--------------------------------------|--------------------------------------|------------------------------------|------------------------------------|------------------------------------|
| 0.014783416                          | 1.402284715                          | 5.034031882                        | 0.137098138                        | 0.000225642                        |
| 0.005995243                          | 0.340457189                          | 1.803324078                        | 0.363231363                        | 4.17E-05                           |
| 0.022268981                          | 1.040661633                          | 3.8978826                          | 0.244314814                        | 0.000435223                        |
| 0.003951774                          | 0.414913002                          | 1.414065761                        | 0.424134307                        | 5.17E-05                           |
| 0.03047456                           | 2.253870919                          | 9.211763049                        | 0.070523932                        | 0.000606041                        |
| 0.014669091                          | 0.627883143                          | 2.363839056                        | 0.287697968                        | 0.000246138                        |
| 0.031143339                          | 0.711080682                          | 4.27846759                         | 0.149758271                        | 0.000291209                        |
| 0.008957957                          | 1.676746259                          | 4.430299883                        | 0.169001784                        | 0.000190474                        |
| 0.005047934                          | 0.582123718                          | 1.884963461                        | 0.355028634                        | 8.52E-05                           |
| 0.003476978                          | 0.217090332                          | 1.051293141                        | 0.708627171                        | 2.96E-05                           |
| 0.009406403                          | 0.640092957                          | 1.860885827                        | 0.32120695                         | 0.000242976                        |
| 0.007681265                          | 0.517658863                          | 2.355438036                        | 0.354140161                        | 8.63E-05                           |
| 0.005235181                          | 0.280291029                          | 1.450834188                        | 0.64799059                         | 5.64E-05                           |
| 0.008810274                          | 0.533044039                          | 2.101985382                        | 0.358560145                        | 0.000142886                        |
| 0.011425894                          | 0.636194599                          | 2.388305047                        | 0.271183413                        | 0.000163005                        |
| 0.001944362                          | 0.08523833                           | 1.046791056                        | 0.764188055                        | 3.64E-06                           |
| 0.013214346                          | 1.23207357                           | 3.786124862                        | 0.180702054                        | 0.000279053                        |
| 0.004664408                          | 0.325831905                          | 1.437497611                        | 0.776505625                        | 6.80E-05                           |
| 0.01796903                           | 1.548108927                          | 5.159250805                        | 0.131534519                        | 0.00043318                         |
| 0.004278745                          | 0.139047708                          | 0.910380673                        | 0.901482337                        | 2.83E-05                           |
| 0.002136699                          | 0.115947461                          | 0.698528012                        | 0.860275395                        | 9.76E-06                           |
| 0.005868058                          | 0.510589984                          | 2.082717537                        | 0.457710517                        | 7.51E-05                           |
| 0.003950284                          | 0.267654014                          | 1.315095454                        | 0.580390651                        | 3.24E-05                           |
| 0.020559113                          | 1.776482715                          | 6.913900518                        | 0.078309136                        | 0.000310817                        |
| 0.007468061                          | 0.363734663                          | 1.453574204                        | 0.575407233                        | 8.94E-05                           |
| 0.014740473                          | 1.3432251                            | 4.172023075                        | 0.18893263                         | 0.000266221                        |
| 0.0035709                            | 0.159078608                          | 1.25881232                         | 0.439864177                        | 1.24E-05                           |
| 0.006885379                          | 0.417556721                          | 1.765684382                        | 0.496673717                        | 8.92E-05                           |
| 0.004684651                          | 0.528815112                          | 1.457194579                        | 0.474686309                        | 0.000126837                        |
| 0.004934401                          | 0.3413186                            | 2.010627648                        | 0.349305628                        | 2.74E-05                           |
| 0.003100547                          | 0.204838815                          | 0.920804689                        | 0.763364892                        | 2.61E-05                           |
| 0.001956067                          | 0.129008722                          | 0.743142241                        | 1.180575507                        | 1.36E-05                           |
| 0.005195636                          | 0.411963131                          | 1.566989591                        | 0.467920293                        | 7.67E-05                           |
| 0.061327299                          | 7.163238227                          | 14.36262574                        | 0.048424301                        | 0.00369878                         |
| 0.022812112                          | 2.929829876                          | 7.508212237                        | 0.083183803                        | 0.000712009                        |
| 0.005037585                          | 0.447499074                          | 1.708274863                        | 0.393771912                        | 6.63E-05                           |
| 0.003316472                          | 0.31287981                           | 1.278175851                        | 0.987200107                        | 4.86E-05                           |
| 0.00312273                           | 0.141862737                          | 0.673431799                        | 1.009937391                        | 3.14E-05                           |
| 0.010658949                          | 0.989135851                          | 3.559719994                        | 0.165532516                        | 0.00014147                         |
| 0.009563742                          | 0.71030169                           | 2.468382188                        | 0.291043811                        | 0.000161655                        |
| 0.008096768                          | 0.481050544                          | 2.532338763                        | 0.252586186                        | 5.76E-05                           |
| 0.010043405                          | 1.1394036                            | 3.692001475                        | 0.202020329                        | 0.000194273                        |
| 0.005307474                          | 0.529202101                          | 1.612796453                        | 0.405379455                        | 0.000103384                        |
| 0.009705894                          | 1.049409777                          | 3.271244716                        | 0.223766029                        | 0.000196577                        |
| 0.005251162                          | 0.456804259                          | 1.624638738                        | 0.36366028                         | 6.60E-05                           |
| 0.004143049                          | 0.149844612                          | 0.767782774                        | 1.495170993                        | 4.38E-05                           |
| 0.002488311                          | 0.19055881                           | 0.73754745                         | 0.896269267                        | 2.76E-05                           |
| 0.014678411                          | 1.098538058                          | 3.346716127                        | 0.240523922                        | 0.000370877                        |
| 0.050877441                          | 6.768422365                          | 14.99959095                        | 0.034797858                        | 0.002071708                        |
| 0.019693651                          | 2.50000031                           | 9.100772877                        | 0.064837805                        | 0.000357656                        |
| 0.003322121                          | 0.193119298                          | 1.020082606                        | 0.748625171                        | 2.57E-05                           |
| 0.008026267                          | 0.660196181                          | 1.674094059                        | 0.467464645                        | 0.000395161                        |
| 0.00284804                           | 0.288356153                          | 1.194441542                        | 0.60283849                         | 2.67E-05                           |
| 0.016748727                          | 0.687632776                          | 2.959923108                        | 0.201575899                        | 0.000231734                        |
| 0.001996102                          | 0.082581942                          | 0.592132578                        | 1.316705607                        | 1.03E-05                           |
| 0.010885542                          | 1.326170805                          | 3.703090523                        | 0.201637356                        | 0.000234036                        |
| 0.004176174                          | 0.63431553                           | 1.573991882                        | 0.415323563                        | 9.73E-05                           |
| 0.007518525                          | 0.837018561                          | 2.817493756                        | 0.192812031                        | 0.000116132                        |
| 0.013238999                          | 0.754166894                          | 3.063009951                        | 0.226184205                        | 0.000178428                        |
| 0.011127701                          | 0.401810693                          | 1.877898562                        | 0.355476772                        | 0.000134357                        |
| 0.004393031                          | 0.442596297                          | 1.557224608                        | 0.725843506                        | 8.17E-05                           |
| 0.002003484                          | 0.280897556                          | 1.271570397                        | 0.707352086                        | 1.61E-05                           |
| 0.00378751                           | 0.184881696                          | 1.272455597                        | 0.538806633                        | 1.50E-05                           |
| 0.004234332                          | 0.170050583                          | 0.97932051                         | 0.512875804                        | 2.41E-05                           |
| 0.0043653768                         | 2.592407159                          | 8.357957979                        | 0.071619036                        | 0.001099463                        |
| 0.007660025                          | 0.664856936                          | 2.939428234                        | 0.229341752                        | 6.80E-05                           |
| 0.021335394                          | 2.846451278                          | 7.792267366                        | 0.075787408                        | 0.000485009                        |
| 0.003214262                          | 0.282401627                          | 0.995056385                        | 0.930806143                        | 6.07E-05                           |
| 0.018477025                          | 1.543899182                          | 4.593022836                        | 0.154723384                        | 0.000502436                        |
| 0.005074798                          | 0.429494607                          | 1.600911992                        | 0.555793635                        | 7.15E-05                           |
| 0.003298247                          | 0.332104124                          | 1.219513806                        | 0.679895481                        | 4.43E-05                           |
| 0.008066082                          | 0.789793784                          | 2.525844937                        | 0.367079348                        | 0.000180401                        |
| 0.002110172                          | 0.134493739                          | 0.690622871                        | 1.264277354                        | 1.65E-05                           |
| 0.001736399                          | 0.092229162                          | 0.517961383                        | 1.103545586                        | 9.35E-06                           |
| 0.001304551                          | 0.085711482                          | 0.565947313                        | 1.197639783                        | 5.80E-06                           |
| 0.008233259                          | 1.235109801                          | 3.327924661                        | 0.203340783                        | 0.000180447                        |
| 0.008128742                          | 0.889797751                          | 2.913256124                        | 0.255851308                        | 0.000118683                        |
| 0.014371566                          | 1.283927764                          | 3.940420906                        | 0.306222753                        | 0.000406422                        |
| 0.005159458                          | 0.54306774                           | 1.548676497                        | 0.455954209                        | 0.000101829                        |
| 0.00345016                           | 0.269182511                          | 1.034741363                        | 0.73581978                         | 4.09E-05                           |
| 0.017150808                          | 2.957890389                          | 6.559559883                        | 0.115181047                        | 0.000562878                        |
| 0.006771436                          | 1.02496221                           | 2.699792288                        | 0.244453625                        | 0.000144221                        |
| 0.004171261                          | 0.378906907                          | 1.548685671                        | 0.375801681                        | 3.88E-05                           |
| 0.0049564804                         | 3.948209406                          | 12.00706776                        | 0.045789059                        | 0.001632145                        |
| 0.00306463                           | 0.166454393                          | 0.729399103                        | 1.222539309                        | 3.69E-05                           |
| 0.002092367                          | 0.125302224                          | 0.789570881                        | 0.867627856                        | 9.84E-06                           |
| 0.012197803                          | 1.124350569                          | 3.612908662                        | 0.283387303                        | 0.000277639                        |
| 0.005529072                          | 0.910411443                          | 2.395974284                        | 0.25073525                         | 0.000145929                        |
| 0.046118469                          | 1.830610204                          | 6.78024578                         | 0.092434809                        | 0.000933463                        |
| 0.063351288                          | 5.691855066                          | 13.54501524                        | 0.050307317                        | 0.002443796                        |
| 0.003024663                          | 0.270716139                          | 1.297259023                        | 0.508651609                        | 2.25E-05                           |
| 0.012006401                          | 1.724121931                          | 4.671200927                        | 0.282837756                        | 0.000340577                        |
| 0.0110492                            | 0.413737975                          | 2.036295836                        | 0.334058248                        | 0.00010628                         |
| 0.002653696                          | 0.152729965                          | 0.739143145                        | 0.978492168                        | 2.23E-05                           |
| 0.001841713                          | 0.089168448                          | 0.441468629                        | 1.641513592                        | 1.60E-05                           |
| 0.029787128                          | 6.222723679                          | 12.92020289                        | 0.060206711                        | 0.001882327                        |
| 0.009277729                          | 0.576330148                          | 2.496605656                        | 0.210509464                        | 0.000106261                        |
| 0.06054816                           | 5.234002424                          | 11.65106945                        | 0.058267576                        | 0.002820441                        |
| 0.0276382                            | 0.950931943                          | 5.176079358                        | 0.115058519                        | 0.000336183                        |
| 0.013009346                          | 1.868985868                          | 6.793408281                        | 0.104420975                        | 0.000147124                        |

| log.sigma.3.0.mm.3D_gldm_GrayLevelVariance | log.sigma.3.0.mm.3D_gldm_HighGrayLevelEmphasis | log.sigma.3.0.mm.3D_gldm_GrayLevelNonUniformityNormalized | log.sigma.3.0.mm.3D_gldm_DependenceEntropy |
|--------------------------------------------|------------------------------------------------|-----------------------------------------------------------|--------------------------------------------|
| 32.16093741                                | 280.2903683                                    | 0.050473882                                               | 6.589926961                                |
| 21.68312042                                | 245.5146846                                    | 0.067035178                                               | 7.053033464                                |
| 25.26246576                                | 148.656682                                     | 0.059217652                                               | 6.213656876                                |
| 33.14398914                                | 299.8060721                                    | 0.0480176                                                 | 6.874859368                                |
| 38.94690451                                | 308.8579387                                    | 0.048145188                                               | 6.339903334                                |
| 19.35419846                                | 151.5863142                                    | 0.063352433                                               | 6.30141803                                 |
| 13.0723701                                 | 141.2255193                                    | 0.086511284                                               | 5.982084455                                |
| 43.26661248                                | 325.1177645                                    | 0.043914168                                               | 6.676509322                                |
| 38.58109347                                | 308.1630592                                    | 0.044622454                                               | 6.94362278                                 |
| 20.61497974                                | 203.7462879                                    | 0.06781901                                                | 6.774214738                                |
| 22.27891784                                | 315.4461911                                    | 0.064692388                                               | 6.278799909                                |
| 27.33677363                                | 191.4601889                                    | 0.055262338                                               | 6.834068569                                |
| 22.27681033                                | 160.2656702                                    | 0.06122689                                                | 6.704284964                                |
| 25.26720345                                | 183.7388193                                    | 0.056336225                                               | 6.465772446                                |
| 23.31413954                                | 199.6410538                                    | 0.057869363                                               | 6.462186993                                |
| 11.96027149                                | 199.5993954                                    | 0.12854598                                                | 6.980194439                                |
| 32.25458945                                | 234.0329513                                    | 0.049827177                                               | 6.535864796                                |
| 29.20364075                                | 153.0694683                                    | 0.053523356                                               | 6.901533314                                |
| 42.16510492                                | 265.9810997                                    | 0.044047661                                               | 6.519621767                                |
| 15.02832097                                | 118.53588                                      | 0.07537689                                                | 6.936533053                                |
| 14.54114854                                | 219.0300536                                    | 0.080519085                                               | 6.822649614                                |
| 27.07731713                                | 189.5656977                                    | 0.054683613                                               | 6.582842599                                |
| 21.3202469                                 | 183.5071402                                    | 0.065208026                                               | 6.711364211                                |
| 29.48613638                                | 428.7380457                                    | 0.054577046                                               | 6.418680154                                |
| 16.49171298                                | 152.8031561                                    | 0.075444807                                               | 6.47106167                                 |
| 31.88253577                                | 228.6498559                                    | 0.052168027                                               | 6.663162119                                |
| 14.33785526                                | 310.2850548                                    | 0.093565421                                               | 7.009108506                                |
| 22.49380542                                | 186.8988137                                    | 0.064629029                                               | 6.586461976                                |
| 36.42215442                                | 284.8283286                                    | 0.050342752                                               | 6.619547735                                |
| 21.02555463                                | 214.6097561                                    | 0.068173335                                               | 7.107078504                                |
| 18.01770565                                | 218.6423404                                    | 0.071290528                                               | 6.673099901                                |
| 20.68340863                                | 186.2026981                                    | 0.065906344                                               | 6.999256459                                |
| 31.52235386                                | 242.5076242                                    | 0.049557365                                               | 6.792521214                                |
| 39.63128698                                | 398.4423077                                    | 0.05362426                                                | 5.400838608                                |
| 37.91921904                                | 290.0783133                                    | 0.050152417                                               | 6.130903292                                |
| 28.34950961                                | 251.1420792                                    | 0.052433585                                               | 6.734538214                                |
| 29.11629581                                | 191.5548611                                    | 0.055952932                                               | 6.894579526                                |
| 19.1195654                                 | 176.1756112                                    | 0.063193531                                               | 6.808992526                                |
| 24.50607767                                | 278.7844311                                    | 0.062365807                                               | 6.558154092                                |
| 28.10209733                                | 212.2488084                                    | 0.053726778                                               | 6.667345134                                |
| 20.81175702                                | 186.9138399                                    | 0.063687361                                               | 6.884226302                                |
| 34.80689357                                | 278.7303253                                    | 0.049047081                                               | 6.579127617                                |
| 30.12433554                                | 239.2807552                                    | 0.052843966                                               | 6.616768618                                |
| 37.92006282                                | 296.3609756                                    | 0.045490065                                               | 6.682873135                                |
| 25.28225935                                | 315.3695421                                    | 0.05513819                                                | 6.588560089                                |
| 13.64984154                                | 72.49416517                                    | 0.081141277                                               | 6.503490924                                |
| 26.48687987                                | 275.1589311                                    | 0.053608939                                               | 6.814608221                                |
| 27.62246498                                | 145.4734134                                    | 0.053932313                                               | 6.327909796                                |
| 37.44202495                                | 497.7686567                                    | 0.079416351                                               | 5.534935997                                |
| 39.76868049                                | 354.5633803                                    | 0.057224636                                               | 6.40412007                                 |
| 20.71222301                                | 193.7683995                                    | 0.063217687                                               | 6.898026115                                |
| 30.97501641                                | 183.7230955                                    | 0.060475576                                               | 6.388150602                                |
| 27.10127773                                | 285.2412981                                    | 0.05483923                                                | 7.05630907                                 |
| 19.24561027                                | 177.9373942                                    | 0.064941981                                               | 6.288394813                                |
| 17.24047032                                | 148.8442434                                    | 0.086129814                                               | 7.054505286                                |
| 39.58572998                                | 247.9101251                                    | 0.044011384                                               | 6.639213621                                |
| 44.18120709                                | 387.1655267                                    | 0.041639973                                               | 6.773021268                                |
| 33.90300799                                | 407.9798917                                    | 0.053803304                                               | 6.678884334                                |
| 25.06902094                                | 227.6941032                                    | 0.056990987                                               | 6.71645643                                 |
| 16.07082293                                | 205.8910329                                    | 0.069046242                                               | 6.404454985                                |
| 31.64291882                                | 186.5214724                                    | 0.053168027                                               | 6.711165037                                |
| 30.91641394                                | 248.8263965                                    | 0.051634664                                               | 7.134062494                                |
| 13.47168505                                | 208.0064725                                    | 0.084293629                                               | 6.836888761                                |
| 14.75476556                                | 269.572684                                     | 0.088597884                                               | 6.98304559                                 |
| 27.52307333                                | 225.8525346                                    | 0.055320776                                               | 5.95189765                                 |
| 30.25847569                                | 278.6303928                                    | 0.055562858                                               | 6.763741913                                |
| 33.44194001                                | 331.0482234                                    | 0.057460898                                               | 6.261530297                                |
| 34.84544012                                | 270.0269002                                    | 0.047676363                                               | 6.992542849                                |
| 28.27364817                                | 174.8139013                                    | 0.059261196                                               | 6.087941481                                |
| 29.70333776                                | 231.9199403                                    | 0.052710342                                               | 6.792653431                                |
| 29.6608202                                 | 255.2335526                                    | 0.053730739                                               | 6.921079044                                |
| 31.90972831                                | 206.6926484                                    | 0.050637787                                               | 6.669523313                                |
| 19.53322961                                | 164.370356                                     | 0.067370335                                               | 6.995868919                                |
| 16.52319377                                | 261.1922275                                    | 0.072798737                                               | 6.98910552                                 |
| 18.45156349                                | 345.6397603                                    | 0.080278597                                               | 7.075635752                                |
| 40.53704587                                | 302.4489247                                    | 0.044626225                                               | 6.552026514                                |
| 27.37040721                                | 249.2390331                                    | 0.054451871                                               | 6.543154157                                |
| 32.64947326                                | 143.3819672                                    | 0.053754367                                               | 6.351439395                                |
| 31.68082326                                | 299.1071429                                    | 0.050542855                                               | 6.702343908                                |
| 24.76057247                                | 205.0614898                                    | 0.05737979                                                | 6.75470553                                 |
| 47.5845931                                 | 340.1031746                                    | 0.041611552                                               | 6.324056017                                |
| 44.06583287                                | 366.7785235                                    | 0.041931711                                               | 6.653386381                                |
| 30.27063817                                | 298.3760745                                    | 0.052457236                                               | 6.952625276                                |
| 30.95286564                                | 394.8413793                                    | 0.063115339                                               | 5.545199997                                |
| 21.86863696                                | 180.6762017                                    | 0.060142809                                               | 6.745707052                                |
| 16.31107186                                | 254.9108839                                    | 0.078401149                                               | 6.993179975                                |
| 33.46670323                                | 182.4447301                                    | 0.050283834                                               | 6.479472767                                |
| 43.12949702                                | 415.0824742                                    | 0.046045508                                               | 6.601181462                                |
| 16.76198155                                | 174.0382514                                    | 0.069963272                                               | 5.744785531                                |
| 27.28562358                                | 264.152381                                     | 0.062312925                                               | 5.342292066                                |
| 26.98972819                                | 360.5597484                                    | 0.058427246                                               | 7.187963959                                |
| 40.41673756                                | 240.2025496                                    | 0.047159515                                               | 6.386094747                                |
| 19.44147732                                | 233.9980431                                    | 0.070398398                                               | 6.786424165                                |
| 19.64779987                                | 185.0877751                                    | 0.066074689                                               | 6.955113636                                |
| 17.69234106                                | 142.823114                                     | 0.067090965                                               | 6.900203323                                |
| 73.69185583                                | 382.3675889                                    | 0.039947507                                               | 6.260728224                                |
| 25.56084444                                | 285.4703947                                    | 0.057472461                                               | 6.616954524                                |
| 36.1451517                                 | 279.0487805                                    | 0.055852998                                               | 5.44114629                                 |
| 20.12408713                                | 169.6860158                                    | 0.068664239                                               | 6.162801935                                |
| 34.23273433                                | 327.2490706                                    | 0.05473636                                                | 6.759691792                                |

| log.sigma.3.0.mm.3D_gldm_DependenceNonUniformity | log.sigma.3.0.mm.3D_gldm_GrayLevelNonUniformity | log.sigma.3.0.mm.3D_gldm_SmallDependenceEmphasis |
|--------------------------------------------------|-------------------------------------------------|--------------------------------------------------|
| 145.9745042                                      | 35.63456091                                     | 0.363288297                                      |
| 276.8574868                                      | 139.2320655                                     | 0.235515998                                      |
| 94.67281106                                      | 25.70046083                                     | 0.381075252                                      |
| 560.9650854                                      | 126.5263757                                     | 0.324542706                                      |
| 90.06963788                                      | 17.28412256                                     | 0.316922562                                      |
| 130.0855365                                      | 40.73561431                                     | 0.278647382                                      |
| 60.2462908                                       | 29.15430267                                     | 0.236523404                                      |
| 242.8063872                                      | 44.00199601                                     | 0.3857464                                        |
| 452.011063                                       | 92.77008177                                     | 0.337393061                                      |
| 499.6074887                                      | 210.1032924                                     | 0.261086615                                      |
| 178.5042322                                      | 53.50060459                                     | 0.287303603                                      |
| 268.1727395                                      | 81.89878543                                     | 0.314652876                                      |
| 389.1060752                                      | 126.9845709                                     | 0.237011405                                      |
| 243.862254                                       | 62.98389982                                     | 0.301503409                                      |
| 200.3962678                                      | 52.71899012                                     | 0.329112393                                      |
| 580.5710379                                      | 893.0089247                                     | 0.148321303                                      |
| 158.9971347                                      | 34.77939693                                     | 0.343625787                                      |
| 409.9957118                                      | 124.8164666                                     | 0.28451177                                       |
| 141.8041237                                      | 25.63573883                                     | 0.38293317                                       |
| 352.116744                                       | 211.1306676                                     | 0.19820398                                       |
| 699.4138591                                      | 420.6316998                                     | 0.221750718                                      |
| 371.55                                           | 94.05581395                                     | 0.30103325                                       |
| 475.3119736                                      | 178.0831197                                     | 0.283337443                                      |
| 104.4802495                                      | 26.25155925                                     | 0.350311526                                      |
| 198.4900332                                      | 90.83554817                                     | 0.292693822                                      |
| 136.9884726                                      | 36.20461095                                     | 0.341878478                                      |
| 374.9774957                                      | 324.2977496                                     | 0.196270078                                      |
| 255.2372645                                      | 92.61339846                                     | 0.309221437                                      |
| 411.7286119                                      | 88.85495751                                     | 0.356646339                                      |
| 312.7773407                                      | 173.2966168                                     | 0.230016868                                      |
| 513.2409563                                      | 226.6325889                                     | 0.264628587                                      |
| 913.5969646                                      | 390.8246206                                     | 0.241140489                                      |
| 422.9498278                                      | 100.750123                                      | 0.304599839                                      |
| 33.46153846                                      | 5.576923077                                     | 0.500934829                                      |
| 95.79518072                                      | 16.65060241                                     | 0.461774154                                      |
| 409.4475248                                      | 105.9158416                                     | 0.275538182                                      |
| 509.7090278                                      | 161.1444444                                     | 0.297907962                                      |
| 566.6529517                                      | 211.9511032                                     | 0.258699625                                      |
| 168.2598802                                      | 52.0754491                                      | 0.287728197                                      |
| 206.8570067                                      | 56.3593899                                      | 0.303842472                                      |
| 223.9796472                                      | 93.87516961                                     | 0.261442141                                      |
| 226.1794334                                      | 46.74186779                                     | 0.334090649                                      |
| 356.6017052                                      | 86.76979294                                     | 0.314567655                                      |
| 239.9287805                                      | 46.62731707                                     | 0.370547741                                      |
| 420.2204473                                      | 103.5495208                                     | 0.315344387                                      |
| 334.5448833                                      | 180.7827648                                     | 0.23212046                                       |
| 868.5972808                                      | 228.6957337                                     | 0.311670879                                      |
| 127.7204117                                      | 31.44253859                                     | 0.331885871                                      |
| 36.44776119                                      | 10.64179104                                     | 0.425545191                                      |
| 110.110664                                       | 28.44064386                                     | 0.375303664                                      |
| 567.4859813                                      | 216.4573598                                     | 0.262972195                                      |
| 165.9866989                                      | 50.01330109                                     | 0.29254776                                       |
| 645.7327925                                      | 209.5406962                                     | 0.278010316                                      |
| 120.5194585                                      | 38.38071066                                     | 0.268640667                                      |
| 709.6024835                                      | 561.8247739                                     | 0.188046634                                      |
| 214.8725825                                      | 38.68600683                                     | 0.407454272                                      |
| 545.49886                                        | 91.31646147                                     | 0.38929494                                       |
| 274.0564578                                      | 69.56767208                                     | 0.342025819                                      |
| 147.995086                                       | 46.39066339                                     | 0.306600991                                      |
| 160.5618615                                      | 60.82973893                                     | 0.249943462                                      |
| 422.6960831                                      | 112.6630486                                     | 0.312226857                                      |
| 942.0569551                                      | 282.8546915                                     | 0.290235303                                      |
| 413.5624595                                      | 260.4673139                                     | 0.198730006                                      |
| 283.548517                                       | 241.9608202                                     | 0.183163087                                      |
| 56.06912442                                      | 12.00460829                                     | 0.418990015                                      |
| 315.7752737                                      | 86.28911784                                     | 0.319136082                                      |
| 96.30964467                                      | 22.63959391                                     | 0.367967054                                      |
| 603.148264                                       | 152.4213325                                     | 0.305457365                                      |
| 100.5381166                                      | 26.43049327                                     | 0.349136987                                      |
| 403.0039781                                      | 106.0004973                                     | 0.326383762                                      |
| 553.475                                          | 163.3414474                                     | 0.301053225                                      |
| 233.1434898                                      | 57.170062                                       | 0.307489876                                      |
| 713.4075077                                      | 348.1698916                                     | 0.22915171                                       |
| 882.1131626                                      | 488.9163192                                     | 0.218901523                                      |
| 1157.155773                                      | 736.9575163                                     | 0.22362637                                       |
| 285.7491039                                      | 49.80286738                                     | 0.369089491                                      |
| 246.6222023                                      | 60.82273948                                     | 0.306527476                                      |
| 131.2918033                                      | 32.79016393                                     | 0.347065095                                      |
| 382.0839002                                      | 89.15759637                                     | 0.334643187                                      |
| 535.2839072                                      | 163.3028812                                     | 0.288608376                                      |
| 139.4801587                                      | 20.97222222                                     | 0.472523424                                      |
| 360.8001491                                      | 56.23042506                                     | 0.434475569                                      |
| 529.1504298                                      | 146.4606017                                     | 0.319951471                                      |
| 41.97931034                                      | 9.151724138                                     | 0.440243295                                      |
| 618.5358301                                      | 203.9442642                                     | 0.260201519                                      |
| 718.3115413                                      | 429.3246896                                     | 0.209665182                                      |
| 169.9742931                                      | 39.12082262                                     | 0.347142941                                      |
| 397.0335052                                      | 71.46262887                                     | 0.397669042                                      |
| 38.13661202                                      | 12.80327869                                     | 0.290262885                                      |
| 33.36190476                                      | 6.542857143                                     | 0.453291005                                      |
| 596.2593711                                      | 232.2483019                                     | 0.258518646                                      |
| 171.2011331                                      | 33.29461756                                     | 0.384195943                                      |
| 163.332681                                       | 71.94716243                                     | 0.261686659                                      |
| 635.3696822                                      | 270.2454768                                     | 0.240328217                                      |
| 859.5673441                                      | 389.5301412                                     | 0.222724123                                      |
| 71.22134387                                      | 10.10671937                                     | 0.468339921                                      |
| 255.8717105                                      | 69.88651316                                     | 0.290999438                                      |
| 35.17886179                                      | 6.869918699                                     | 0.419365402                                      |
| 78.22955145                                      | 26.0237467                                      | 0.276653916                                      |
| 146.5861214                                      | 44.17224287                                     | 0.329525752                                      |

| log.sigma.3.0.mm.3D_gldm_DependenceNonUniformityNormalized | log.sigma.3.0.mm.3D_gldm_DependenceVariance | log.sigma.3.0.mm.3D_gldm_LargeDependenceEmphasis |
|------------------------------------------------------------|---------------------------------------------|--------------------------------------------------|
| 0.206762754                                                | 2.188284955                                 | 9.385269122                                      |
| 0.133296816                                                | 10.12829743                                 | 27.78285989                                      |
| 0.218140118                                                | 2.34063157                                  | 9.119815668                                      |
| 0.212889975                                                | 2.67388195                                  | 10.38899431                                      |
| 0.250890356                                                | 1.494960467                                 | 8.019498607                                      |
| 0.202310321                                                | 2.830133825                                 | 11.718507                                        |
| 0.178772376                                                | 2.658648047                                 | 13.33234421                                      |
| 0.242321744                                                | 1.777231963                                 | 7.726546906                                      |
| 0.217417539                                                | 2.585196892                                 | 10.01010101                                      |
| 0.16126775                                                 | 4.038097842                                 | 15.62621046                                      |
| 0.215845504                                                | 1.915131541                                 | 9.805320435                                      |
| 0.180953266                                                | 3.568176644                                 | 12.95276653                                      |
| 0.187611415                                                | 2.735269475                                 | 13.06557377                                      |
| 0.218123662                                                | 2.078798391                                 | 9.787119857                                      |
| 0.219973949                                                | 1.914254489                                 | 9.035126235                                      |
| 0.083571475                                                | 18.88270771                                 | 56.13890888                                      |
| 0.227789591                                                | 1.853408429                                 | 8.607449857                                      |
| 0.175812912                                                | 3.517417451                                 | 13.59777015                                      |
| 0.243649697                                                | 1.831355322                                 | 7.817869416                                      |
| 0.125711083                                                | 8.751389473                                 | 27.77543734                                      |
| 0.133884736                                                | 8.966178452                                 | 26.08460949                                      |
| 0.216017442                                                | 1.876224986                                 | 9.522093023                                      |
| 0.174043198                                                | 3.736239369                                 | 14.05089711                                      |
| 0.217214656                                                | 2.017660712                                 | 9                                                |
| 0.164858832                                                | 4.502762111                                 | 15.48504983                                      |
| 0.19738973                                                 | 3.13360297                                  | 11.32276657                                      |
| 0.108187391                                                | 16.05380734                                 | 41.80957877                                      |
| 0.178113932                                                | 3.610278896                                 | 13.22330775                                      |
| 0.233274001                                                | 2.130085628                                 | 8.755240793                                      |
| 0.1230438                                                  | 12.70786244                                 | 33.01809599                                      |
| 0.161447297                                                | 4.388665354                                 | 16.07392262                                      |
| 0.154063569                                                | 7.894704777                                 | 22.33726813                                      |
| 0.208042217                                                | 2.268401672                                 | 10.24840138                                      |
| 0.321745562                                                | 0.801775148                                 | 4.5                                              |
| 0.288539701                                                | 1.147336333                                 | 5.542168675                                      |
| 0.202696794                                                | 2.18582884                                  | 10.7980198                                       |
| 0.176982301                                                | 3.747914738                                 | 13.67916667                                      |
| 0.168948405                                                | 3.90666277                                  | 15.08944544                                      |
| 0.201508839                                                | 2.638330525                                 | 11.28263473                                      |
| 0.197194477                                                | 2.72982849                                  | 11.26692088                                      |
| 0.151953628                                                | 5.416172499                                 | 18.38398915                                      |
| 0.237334138                                                | 1.903881155                                 | 8.615949633                                      |
| 0.217175216                                                | 1.927071202                                 | 9.331303289                                      |
| 0.234076859                                                | 1.906326234                                 | 8.237073171                                      |
| 0.223759557                                                | 1.956867308                                 | 9.227902023                                      |
| 0.150154795                                                | 5.279186234                                 | 19.01705566                                      |
| 0.203609302                                                | 2.575747705                                 | 10.71683075                                      |
| 0.219074463                                                | 1.853781676                                 | 8.931389365                                      |
| 0.271998218                                                | 1.524838494                                 | 6.671641791                                      |
| 0.221550632                                                | 2.07214312                                  | 8.674044266                                      |
| 0.165737728                                                | 7.018047428                                 | 19.5146028                                       |
| 0.20070943                                                 | 2.503909031                                 | 11.03143894                                      |
| 0.168995758                                                | 6.154309293                                 | 17.79560325                                      |
| 0.203924634                                                | 2.14358067                                  | 10.88155668                                      |
| 0.108784682                                                | 10.30532141                                 | 33.38448567                                      |
| 0.244451175                                                | 1.959474064                                 | 7.759954494                                      |
| 0.24874549                                                 | 1.526467438                                 | 7.198814409                                      |
| 0.21195395                                                 | 2.467117545                                 | 9.890951276                                      |
| 0.181812145                                                | 4.815495415                                 | 14.92383292                                      |
| 0.182249559                                                | 2.671363287                                 | 12.82292849                                      |
| 0.199479039                                                | 2.421673967                                 | 10.5922605                                       |
| 0.171970967                                                | 4.864188674                                 | 15.64914202                                      |
| 0.133838984                                                | 8.132464469                                 | 25.89773463                                      |
| 0.103825894                                                | 12.32047872                                 | 37.82094471                                      |
| 0.258383062                                                | 1.409458685                                 | 6.612903226                                      |
| 0.20332436                                                 | 3.000813083                                 | 11.27430779                                      |
| 0.244440723                                                | 1.736787858                                 | 7.873096447                                      |
| 0.188660702                                                | 3.154822872                                 | 12.17360025                                      |
| 0.225421786                                                | 1.84160148                                  | 8.582959641                                      |
| 0.20039979                                                 | 2.888895758                                 | 11.07856788                                      |
| 0.182064145                                                | 3.596779778                                 | 13.15789474                                      |
| 0.20650442                                                 | 2.265596352                                 | 10.22409212                                      |
| 0.138043248                                                | 7.207836358                                 | 22.98877709                                      |
| 0.131345021                                                | 7.800746956                                 | 24.85139964                                      |
| 0.126051827                                                | 9.270389831                                 | 27.74727669                                      |
| 0.256047584                                                | 1.325615678                                 | 6.998207885                                      |
| 0.220789796                                                | 2.083089616                                 | 9.651745748                                      |
| 0.215232464                                                | 2.254135985                                 | 9.429508197                                      |
| 0.21660085                                                 | 2.364430201                                 | 9.725623583                                      |
| 0.188082891                                                | 2.92849132                                  | 12.14054814                                      |
| 0.276746347                                                | 1.472080499                                 | 6.115079365                                      |
| 0.269053057                                                | 1.419416654                                 | 6.367636092                                      |
| 0.189523793                                                | 3.520005993                                 | 12.47707736                                      |
| 0.289512485                                                | 1.384066587                                 | 6.103448276                                      |
| 0.18240514                                                 | 2.810595396                                 | 12.79887939                                      |
| 0.131174496                                                | 8.414543228                                 | 26.0036523                                       |
| 0.218475955                                                | 2.127127101                                 | 9.151670951                                      |
| 0.255820557                                                | 1.317500199                                 | 6.692010309                                      |
| 0.208396787                                                | 1.985547493                                 | 10.27868852                                      |
| 0.317732426                                                | 1.016780045                                 | 5.20952381                                       |
| 0.150002358                                                | 9.025664111                                 | 23.68830189                                      |
| 0.242494523                                                | 1.571628053                                 | 7.410764873                                      |
| 0.159816713                                                | 15.06465202                                 | 31.77690802                                      |
| 0.155347111                                                | 7.870083034                                 | 22.13594132                                      |
| 0.148048113                                                | 4.833538754                                 | 18.78194971                                      |
| 0.281507288                                                | 1.519192614                                 | 6.193675889                                      |
| 0.210420815                                                | 2.15157278                                  | 10.23848684                                      |
| 0.286007006                                                | 1.160155992                                 | 5.943089431                                      |
| 0.206410426                                                | 2.219784045                                 | 10.72031662                                      |
| 0.181643273                                                | 3.348104949                                 | 12.40768278                                      |



| log.sigma.3.0.mm.3D_gldm_LargeDependenceLowGrayLevelEmphasis | log.sigma.3.0.mm.3D_gldm_SmallDependenceHighGrayLevelEmphasis | log.sigma.3.0.mm.3D_gldm_LargeDependenceHighGrayLevelEmphasis |
|--------------------------------------------------------------|---------------------------------------------------------------|---------------------------------------------------------------|
| 0.073012581                                                  | 123.7138667                                                   | 2079.505666                                                   |
| 0.146983341                                                  | 71.01019309                                                   | 6281.748676                                                   |
| 0.259272295                                                  | 70.86022033                                                   | 915.983871                                                    |
| 0.065644895                                                  | 99.45544719                                                   | 2966.101328                                                   |
| 0.052922316                                                  | 91.8959872                                                    | 2466.406685                                                   |
| 0.200471044                                                  | 50.84917561                                                   | 1371.595645                                                   |
| 0.209904997                                                  | 38.04086637                                                   | 1725.344214                                                   |
| 0.070146013                                                  | 140.8108247                                                   | 2115.560878                                                   |
| 0.06851173                                                   | 113.9981928                                                   | 2744.78355                                                    |
| 0.133688897                                                  | 67.01725657                                                   | 2547.398967                                                   |
| 0.046191778                                                  | 90.88681756                                                   | 3096.614268                                                   |
| 0.165362432                                                  | 74.07895453                                                   | 1836.384615                                                   |
| 0.182320626                                                  | 42.78456616                                                   | 1833.140309                                                   |
| 0.149200601                                                  | 60.3021005                                                    | 1665.449016                                                   |
| 0.090721188                                                  | 68.71714103                                                   | 1689.032931                                                   |
| 0.342878489                                                  | 36.4282075                                                    | 9996.076436                                                   |
| 0.12074961                                                   | 85.93272766                                                   | 1839.416905                                                   |
| 0.35548807                                                   | 55.85625316                                                   | 1483.319039                                                   |
| 0.14454474                                                   | 110.563922                                                    | 1725.716495                                                   |
| 0.438641714                                                  | 31.42182231                                                   | 2802.333809                                                   |
| 0.151904448                                                  | 59.38634085                                                   | 5106.803025                                                   |
| 0.149572558                                                  | 65.64570619                                                   | 1517.165698                                                   |
| 0.156971152                                                  | 66.01467723                                                   | 1955.344562                                                   |
| 0.033289802                                                  | 145.9363109                                                   | 4007.386694                                                   |
| 0.179840784                                                  | 59.04882226                                                   | 1746.502492                                                   |
| 0.119537513                                                  | 96.83652628                                                   | 2037.54611                                                    |
| 0.153626086                                                  | 71.82226048                                                   | 12081.11079                                                   |
| 0.142841393                                                  | 73.89628027                                                   | 1775.085834                                                   |
| 0.068401864                                                  | 97.35811623                                                   | 2619.246459                                                   |
| 0.196409554                                                  | 61.4898498                                                    | 6990.912667                                                   |
| 0.121033675                                                  | 72.58307517                                                   | 2707.428122                                                   |
| 0.211559761                                                  | 55.02557096                                                   | 3348.428331                                                   |
| 0.090900636                                                  | 79.25518036                                                   | 2451.001476                                                   |
| 0.026613022                                                  | 190.4176683                                                   | 1953.076923                                                   |
| 0.078833744                                                  | 141.2132397                                                   | 1508.512048                                                   |
| 0.089663236                                                  | 72.7773896                                                    | 2635.514356                                                   |
| 0.160976133                                                  | 71.14885309                                                   | 2077.9375                                                     |
| 0.151013005                                                  | 51.09418463                                                   | 2493.339595                                                   |
| 0.067909927                                                  | 81.94399712                                                   | 3244.377246                                                   |
| 0.126692859                                                  | 73.77016649                                                   | 2070.252622                                                   |
| 0.211310567                                                  | 57.60453089                                                   | 3091.004749                                                   |
| 0.07367055                                                   | 101.2853672                                                   | 2117.513116                                                   |
| 0.091304675                                                  | 74.51604454                                                   | 2325.30877                                                    |
| 0.077910019                                                  | 124.5624019                                                   | 2190.638049                                                   |
| 0.043754177                                                  | 103.4140802                                                   | 2895.43344                                                    |
| 1.049387061                                                  | 23.15963191                                                   | 888.6674147                                                   |
| 0.063186822                                                  | 92.7506557                                                    | 2687.824191                                                   |
| 0.525537566                                                  | 57.27422341                                                   | 1019.202401                                                   |
| 0.025214482                                                  | 203.0215485                                                   | 3428.141791                                                   |
| 0.08212128                                                   | 135.9213731                                                   | 3027.855131                                                   |
| 0.164039512                                                  | 61.4444683                                                    | 3234.665596                                                   |
| 0.240265896                                                  | 54.54199866                                                   | 1859.471584                                                   |
| 0.094355915                                                  | 90.49865386                                                   | 4486.537294                                                   |
| 0.129756183                                                  | 52.29029486                                                   | 1736.817259                                                   |
| 0.359360374                                                  | 34.78196148                                                   | 4371.196535                                                   |
| 0.144828589                                                  | 111.7034003                                                   | 1533.707622                                                   |
| 0.042882882                                                  | 160.0000284                                                   | 2634.563611                                                   |
| 0.036446311                                                  | 135.7334713                                                   | 4274.652746                                                   |
| 0.114284622                                                  | 78.85469772                                                   | 2878.558968                                                   |
| 0.102974039                                                  | 55.03703167                                                   | 2337.6958                                                     |
| 0.178867011                                                  | 73.88471703                                                   | 1447.834356                                                   |
| 0.114193868                                                  | 81.95785511                                                   | 3504.366375                                                   |
| 0.160266877                                                  | 46.87244957                                                   | 4881.554045                                                   |
| 0.160138803                                                  | 54.71291535                                                   | 9900.874039                                                   |
| 0.10069244                                                   | 104.3558948                                                   | 1314.313364                                                   |
| 0.06616463                                                   | 100.4864925                                                   | 2903.636188                                                   |
| 0.056387749                                                  | 133.6289305                                                   | 2561.667513                                                   |
| 0.103478997                                                  | 97.05257255                                                   | 2699.073506                                                   |
| 0.237517421                                                  | 69.36713406                                                   | 1128.549327                                                   |
| 0.100288841                                                  | 90.66513349                                                   | 2064.865738                                                   |
| 0.106455717                                                  | 91.24677859                                                   | 2655.926974                                                   |
| 0.148913576                                                  | 74.02936447                                                   | 1793.236492                                                   |
| 0.23793941                                                   | 48.7168789                                                    | 3194.540248                                                   |
| 0.124523151                                                  | 69.24857784                                                   | 5874.98913                                                    |
| 0.092195095                                                  | 84.39711665                                                   | 9112.116231                                                   |
| 0.066126806                                                  | 118.7131671                                                   | 2105.248208                                                   |
| 0.076898856                                                  | 81.557635                                                     | 2143.239033                                                   |
| 0.43158045                                                   | 64.52216367                                                   | 831.6704918                                                   |
| 0.0666322                                                    | 108.2685469                                                   | 2560.634354                                                   |
| 0.116923968                                                  | 67.0004506                                                    | 2163.284259                                                   |
| 0.052604423                                                  | 183.6536067                                                   | 1586.011905                                                   |
| 0.041816905                                                  | 161.9590421                                                   | 2283.425802                                                   |
| 0.075832878                                                  | 99.4315658                                                    | 3528.577364                                                   |
| 0.029115968                                                  | 163.3030881                                                   | 2415.365517                                                   |
| 0.153410184                                                  | 54.45181969                                                   | 1935.005308                                                   |
| 0.131870785                                                  | 63.47651259                                                   | 5829.295106                                                   |
| 0.212086677                                                  | 77.25197641                                                   | 1112.141388                                                   |
| 0.035797803                                                  | 160.6746443                                                   | 2790.014175                                                   |
| 0.097176206                                                  | 49.61688305                                                   | 1716.540984                                                   |
| 0.041341783                                                  | 115.3146984                                                   | 1477.695238                                                   |
| 0.084416904                                                  | 104.1150833                                                   | 7844.833962                                                   |
| 0.096311564                                                  | 117.5657149                                                   | 1231.800283                                                   |
| 0.16504708                                                   | 65.49279802                                                   | 7023.123288                                                   |
| 0.180455371                                                  | 52.01972125                                                   | 3992.843765                                                   |
| 0.260047234                                                  | 38.83077631                                                   | 2323.432828                                                   |
| 0.070163057                                                  | 181.4879205                                                   | 2441.521739                                                   |
| 0.060586322                                                  | 76.11872152                                                   | 2956.560855                                                   |
| 0.565227238                                                  | 125.6599187                                                   | 1394.463415                                                   |
| 0.196703982                                                  | 48.71946                                                      | 1727.511873                                                   |
| 0.068452487                                                  | 138.1859801                                                   | 3342.451053                                                   |

| log.sigma.3.0.mm.3D_gldm_SmallDependenceLowGrayLevelEmphasis | log.sigma.3.0.mm.3D_gldm_LowGrayLevelEmphasis | log.sigma.3.0.mm.3D_gldm_DistanceZoneVariabilityNormalized |
|--------------------------------------------------------------|-----------------------------------------------|------------------------------------------------------------|
| 0.003977189                                                  | 0.008317533                                   | 0.897735573                                                |
| 0.001923937                                                  | 0.006843913                                   | 0.88796283                                                 |
| 0.009153155                                                  | 0.022723757                                   | 0.876729625                                                |
| 0.003897118                                                  | 0.00910291                                    | 0.879078778                                                |
| 0.007138383                                                  | 0.01226628                                    | 0.863249403                                                |
| 0.004929646                                                  | 0.016537579                                   | 0.940227833                                                |
| 0.00566818                                                   | 0.017335457                                   | 0.733359475                                                |
| 0.003803655                                                  | 0.008401617                                   | 0.87480557                                                 |
| 0.00305456                                                   | 0.007924016                                   | 0.944681552                                                |
| 0.00264425                                                   | 0.009512237                                   | 0.964109146                                                |
| 0.002549615                                                  | 0.005891713                                   | 0.809638526                                                |
| 0.004183348                                                  | 0.013476113                                   | 0.929671266                                                |
| 0.004859005                                                  | 0.015867633                                   | 0.944399098                                                |
| 0.004087655                                                  | 0.014793491                                   | 0.906111873                                                |
| 0.005873642                                                  | 0.012895615                                   | 0.875246647                                                |
| 0.001166859                                                  | 0.00717067                                    | 0.927727797                                                |
| 0.004471356                                                  | 0.013807929                                   | 0.772510247                                                |
| 0.006197297                                                  | 0.025288262                                   | 0.956928374                                                |
| 0.005632777                                                  | 0.014338232                                   | 0.807000446                                                |
| 0.003396937                                                  | 0.017972321                                   | 0.958352196                                                |
| 0.001603257                                                  | 0.006465294                                   | 0.937518647                                                |
| 0.004461073                                                  | 0.015281395                                   | 0.838319459                                                |
| 0.002651909                                                  | 0.010589785                                   | 0.95125                                                    |
| 0.003535848                                                  | 0.005867997                                   | 0.72334032                                                 |
| 0.003689418                                                  | 0.011776948                                   | 0.916244872                                                |
| 0.003432303                                                  | 0.012174026                                   | 0.907503858                                                |
| 0.001065722                                                  | 0.004242655                                   | 0.911582825                                                |
| 0.003213322                                                  | 0.010175097                                   | 0.962419812                                                |
| 0.003669164                                                  | 0.00888057                                    | 0.943347241                                                |
| 0.002204961                                                  | 0.009002374                                   | 0.941996733                                                |
| 0.001828821                                                  | 0.0070785                                     | 0.973978498                                                |
| 0.002387225                                                  | 0.010353626                                   | 0.951531109                                                |
| 0.003703118                                                  | 0.010311029                                   | 0.945141779                                                |
| 0.012720643                                                  | 0.014729663                                   | 0.758300781                                                |
| 0.0070493                                                    | 0.017496892                                   | 0.847222222                                                |
| 0.002544472                                                  | 0.008624983                                   | 0.863754325                                                |
| 0.004094467                                                  | 0.012746517                                   | 0.958598406                                                |
| 0.004044361                                                  | 0.012807319                                   | 0.947762728                                                |
| 0.003909807                                                  | 0.008618023                                   | 0.837662974                                                |
| 0.005344845                                                  | 0.013188485                                   | 0.952659455                                                |
| 0.002981605                                                  | 0.01329187                                    | 0.884969523                                                |
| 0.003653271                                                  | 0.009162328                                   | 0.91343134                                                 |
| 0.005531381                                                  | 0.01297733                                    | 0.894589308                                                |
| 0.002733019                                                  | 0.009342698                                   | 0.836666683                                                |
| 0.002233643                                                  | 0.005687295                                   | 0.885839871                                                |
| 0.007860944                                                  | 0.04549797                                    | 0.986278528                                                |
| 0.002458697                                                  | 0.006628405                                   | 0.857251691                                                |
| 0.010399652                                                  | 0.043574279                                   | 0.917167699                                                |
| 0.010911153                                                  | 0.012432961                                   | 0.652483849                                                |
| 0.005292254                                                  | 0.011394153                                   | 0.743077182                                                |
| 0.003008699                                                  | 0.009884696                                   | 0.932069589                                                |
| 0.005711077                                                  | 0.018376511                                   | 0.945435519                                                |
| 0.001895712                                                  | 0.006047106                                   | 0.912692687                                                |
| 0.005356326                                                  | 0.013690857                                   | 0.886669529                                                |
| 0.002782301                                                  | 0.013732708                                   | 0.966285581                                                |
| 0.009546851                                                  | 0.021701976                                   | 0.831260141                                                |
| 0.002686232                                                  | 0.006249477                                   | 0.750350535                                                |
| 0.00309162                                                   | 0.00586226                                    | 0.706970426                                                |
| 0.004102977                                                  | 0.009685808                                   | 0.902852683                                                |
| 0.003116547                                                  | 0.008503621                                   | 0.961255448                                                |
| 0.003773001                                                  | 0.015616135                                   | 0.932244433                                                |
| 0.002795613                                                  | 0.008786165                                   | 0.933961575                                                |
| 0.001692596                                                  | 0.006965033                                   | 0.949330081                                                |
| 0.001666567                                                  | 0.005514683                                   | 0.971383493                                                |
| 0.008154991                                                  | 0.017620691                                   | 0.963976096                                                |
| 0.002956635                                                  | 0.007661721                                   | 0.900912558                                                |
| 0.004592374                                                  | 0.009091279                                   | 0.779193334                                                |
| 0.002209865                                                  | 0.007781009                                   | 0.945248959                                                |
| 0.010982678                                                  | 0.024848962                                   | 0.871265278                                                |
| 0.003784138                                                  | 0.009854701                                   | 0.928931233                                                |
| 0.002030315                                                  | 0.007691611                                   | 0.900532749                                                |
| 0.004110521                                                  | 0.013902402                                   | 0.931122449                                                |
| 0.002704085                                                  | 0.011523613                                   | 0.940439527                                                |
| 0.001172079                                                  | 0.005263767                                   | 0.960185427                                                |
| 0.001046769                                                  | 0.003854527                                   | 0.941496569                                                |
| 0.004108613                                                  | 0.011027065                                   | 0.81526517                                                 |
| 0.003686971                                                  | 0.009063907                                   | 0.86649512                                                 |
| 0.012867105                                                  | 0.035492506                                   | 0.88677602                                                 |
| 0.00267924                                                   | 0.007508492                                   | 0.854320278                                                |
| 0.00314162                                                   | 0.009848056                                   | 0.880826446                                                |
| 0.005167003                                                  | 0.009180061                                   | 0.855675587                                                |
| 0.004625423                                                  | 0.008256151                                   | 0.810342724                                                |
| 0.002473033                                                  | 0.007414434                                   | 0.919208706                                                |
| 0.010724881                                                  | 0.012710654                                   | 0.692356994                                                |
| 0.002699905                                                  | 0.010970503                                   | 0.969789925                                                |
| 0.001304707                                                  | 0.005502345                                   | 0.758814328                                                |
| 0.006203916                                                  | 0.018919778                                   | 0.945987654                                                |
| 0.002909372                                                  | 0.006044438                                   | 0.769149345                                                |
| 0.009516974                                                  | 0.01567347                                    | 0.761420118                                                |
| 0.01503425                                                   | 0.018507771                                   | 0.82                                                       |
| 0.001574713                                                  | 0.004568362                                   | 0.901349726                                                |
| 0.004826319                                                  | 0.011802043                                   | 0.969612102                                                |
| 0.002952269                                                  | 0.007860797                                   | 0.923650273                                                |
| 0.003209594                                                  | 0.011385851                                   | 0.936523277                                                |
| 0.003501992                                                  | 0.015400881                                   | 0.954478853                                                |
| 0.013535464                                                  | 0.018714156                                   | 0.671530612                                                |
| 0.00479734                                                   | 0.009981998                                   | 0.972545367                                                |
| 0.005094017                                                  | 0.040658623                                   | 0.855957031                                                |
| 0.004938097                                                  | 0.020860765                                   | 0.848267285                                                |
| 0.002385602                                                  | 0.007592518                                   | 0.905299059                                                |

| log.sigma.3.0.mm.3D_gldzm_LowIntensityEmphasis | log.sigma.3.0.mm.3D_gldzm_LargeDistanceEmphasis | log.sigma.3.0.mm.3D_gldzm_HighIntensitySmallDistanceEmphasis |
|------------------------------------------------|-------------------------------------------------|--------------------------------------------------------------|
| 0.010328281                                    | 1.162162162                                     | 330.8175676                                                  |
| 0.008215193                                    | 1.178700361                                     | 293.2694043                                                  |
| 0.023266004                                    | 1.197969543                                     | 176.4416244                                                  |
| 0.011806703                                    | 1.19391635                                      | 296.1292776                                                  |
| 0.019721047                                    | 1.22147651                                      | 293.7919463                                                  |
| 0.017159711                                    | 1.092511013                                     | 180.5693833                                                  |
| 0.023896163                                    | 1.475247525                                     | 152.9727723                                                  |
| 0.009147247                                    | 1.201298701                                     | 354.2732684                                                  |
| 0.008892531                                    | 1.085409253                                     | 334.2458482                                                  |
| 0.010337762                                    | 1.05483871                                      | 259.7897849                                                  |
| 0.008109762                                    | 1.319587629                                     | 301.1640893                                                  |
| 0.014196892                                    | 1.109489051                                     | 235.0720803                                                  |
| 0.020368293                                    | 1.085858586                                     | 181.1056397                                                  |
| 0.014104627                                    | 1.148148148                                     | 198.7611111                                                  |
| 0.016841854                                    | 1.200534759                                     | 202.1370321                                                  |
| 0.008473239                                    | 1.112637363                                     | 247.8276099                                                  |
| 0.013684748                                    | 1.39261745                                      | 239.8263423                                                  |
| 0.022110296                                    | 1.066062176                                     | 199.9190415                                                  |
| 0.014202733                                    | 1.324626866                                     | 278.6343284                                                  |
| 0.016575576                                    | 1.063829787                                     | 166.1968085                                                  |
| 0.007085881                                    | 1.096848578                                     | 270.7868947                                                  |
| 0.016035289                                    | 1.266129032                                     | 214.2762097                                                  |
| 0.009675659                                    | 1.075                                           | 233.9059783                                                  |
| 0.009241588                                    | 1.497487437                                     | 389.7022613                                                  |
| 0.012216762                                    | 1.131386861                                     | 196.439781                                                   |
| 0.011508148                                    | 1.145833333                                     | 278.3741319                                                  |
| 0.005226829                                    | 1.139072848                                     | 364.8423841                                                  |
| 0.010139226                                    | 1.057471264                                     | 238.8175287                                                  |
| 0.010072074                                    | 1.087533156                                     | 271.5822281                                                  |
| 0.010646667                                    | 1.089686099                                     | 266.7264574                                                  |
| 0.006810271                                    | 1.039553753                                     | 277.0263692                                                  |
| 0.0090805473                                   | 1.074556213                                     | 227.5372781                                                  |
| 0.01201881                                     | 1.084677419                                     | 255.6364247                                                  |
| 0.021513421                                    | 1.421875                                        | 377.5859375                                                  |
| 0.017695903                                    | 1.25                                            | 295.7861111                                                  |
| 0.009308629                                    | 1.220588235                                     | 253.2540441                                                  |
| 0.013646772                                    | 1.063444109                                     | 241.2968278                                                  |
| 0.016166209                                    | 1.080516899                                     | 197.8014414                                                  |
| 0.01237579                                     | 1.267326733                                     | 271.9405941                                                  |
| 0.016242663                                    | 1.07277628                                      | 245.6239892                                                  |
| 0.013296392                                    | 1.18380744                                      | 212.8402626                                                  |
| 0.010680043                                    | 1.136020151                                     | 297.0799748                                                  |
| 0.01738445                                     | 1.167464115                                     | 231.3377193                                                  |
| 0.00835285                                     | 1.269146608                                     | 324.4934354                                                  |
| 0.006907297                                    | 1.182320442                                     | 316.8138812                                                  |
| 0.036283683                                    | 1.020725389                                     | 106.1196028                                                  |
| 0.007654574                                    | 1.232075472                                     | 285.1172956                                                  |
| 0.033585837                                    | 1.12987013                                      | 171.0010823                                                  |
| 0.022368457                                    | 1.671641791                                     | 460.2873134                                                  |
| 0.013823136                                    | 1.45412844                                      | 344.8337156                                                  |
| 0.011380391                                    | 1.105613701                                     | 231.4312559                                                  |
| 0.017665312                                    | 1.084210526                                     | 193.3938596                                                  |
| 0.006692574                                    | 1.137239165                                     | 320.9951846                                                  |
| 0.018186646                                    | 1.180904523                                     | 196.1193467                                                  |
| 0.014657862                                    | 1.051454139                                     | 188.0018643                                                  |
| 0.024611577                                    | 1.279069767                                     | 261.2656977                                                  |
| 0.006832661                                    | 1.438596491                                     | 384.1008772                                                  |
| 0.008365788                                    | 1.534926471                                     | 372.2274816                                                  |
| 0.012519166                                    | 1.153583618                                     | 259.5895904                                                  |
| 0.011598168                                    | 1.059288538                                     | 226.5118577                                                  |
| 0.013499401                                    | 1.105331599                                     | 233.4213264                                                  |
| 0.009852311                                    | 1.102564103                                     | 273.1832265                                                  |
| 0.008249859                                    | 1.078034682                                     | 240.9931358                                                  |
| 0.008762392                                    | 1.043557169                                     | 305.2667877                                                  |
| 0.019998621                                    | 1.055045872                                     | 245.4610092                                                  |
| 0.009230518                                    | 1.15682968                                      | 307.2681282                                                  |
| 0.011526764                                    | 1.379120879                                     | 339.7431319                                                  |
| 0.007035051                                    | 1.084507042                                     | 318.0596391                                                  |
| 0.028560304                                    | 1.207446809                                     | 197.8417553                                                  |
| 0.011307066                                    | 1.110687023                                     | 271.1854326                                                  |
| 0.007075455                                    | 1.157466063                                     | 300.400905                                                   |
| 0.013964129                                    | 1.107142857                                     | 236.9952381                                                  |
| 0.011578752                                    | 1.092172641                                     | 215.180139                                                   |
| 0.005232112                                    | 1.060960591                                     | 320.6560961                                                  |
| 0.004630676                                    | 1.090484282                                     | 372.2413976                                                  |
| 0.012085608                                    | 1.308910891                                     | 303.0222772                                                  |
| 0.011437157                                    | 1.215777262                                     | 258.4100928                                                  |
| 0.032983337                                    | 1.180722892                                     | 186.3594378                                                  |
| 0.00798043                                     | 1.237288136                                     | 317.4851695                                                  |
| 0.010746382                                    | 1.190909091                                     | 227.489899                                                   |
| 0.010294566                                    | 1.234875445                                     | 375.2384342                                                  |
| 0.010031258                                    | 1.31824611                                      | 351.4809052                                                  |
| 0.008099407                                    | 1.126522962                                     | 303.7071228                                                  |
| 0.020349978                                    | 1.569620253                                     | 373.6803797                                                  |
| 0.010487987                                    | 1.046021093                                     | 210.3425216                                                  |
| 0.00622706                                     | 1.420803783                                     | 272.0023641                                                  |
| 0.017755275                                    | 1.083333333                                     | 222.7376543                                                  |
| 0.00700019                                     | 1.399467377                                     | 390.5775632                                                  |
| 0.028520949                                    | 1.415384615                                     | 164.5115385                                                  |
| 0.027767412                                    | 1.3                                             | 248.1833333                                                  |
| 0.005792004                                    | 1.156097561                                     | 391.3727642                                                  |
| 0.012063842                                    | 1.046296296                                     | 302.4729938                                                  |
| 0.010786646                                    | 1.119266055                                     | 247.3302752                                                  |
| 0.013932393                                    | 1.098445996                                     | 217.3054836                                                  |
| 0.016650036                                    | 1.069910898                                     | 180.5039411                                                  |
| 0.026316124                                    | 1.621428571                                     | 360.2267857                                                  |
| 0.015911817                                    | 1.041763341                                     | 267.3863109                                                  |
| 0.023085624                                    | 1.234375                                        | 296.5273438                                                  |
| 0.02141263                                     | 1.248120301                                     | 169.0639098                                                  |
| 0.00871036                                     | 1.149501661                                     | 411.3048173                                                  |

| log.sigma.3.0.mm.3D_gldzm_LowIntensityLargeDistanceEmphasis | log.sigma.3.0.mm.3D_gldzm_HighIntensityEmphasis | log.sigma.3.0.mm.3D_gldzm_DistanceZoneVariability | log.sigma.3.0.mm.3D_gldzm_ZonePercentage |
|-------------------------------------------------------------|-------------------------------------------------|---------------------------------------------------|------------------------------------------|
| 0.012640792                                                 | 336.9290541                                     | 265.7297297                                       | 0.419263456                              |
| 0.01022911                                                  | 300.2454874                                     | 491.9314079                                       | 0.266730862                              |
| 0.041544998                                                 | 182.4720812                                     | 172.715736                                        | 0.453917051                              |
| 0.016287937                                                 | 306.4809886                                     | 924.7908745                                       | 0.399240987                              |
| 0.028954725                                                 | 302.6711409                                     | 128.6241611                                       | 0.415041783                              |
| 0.019038178                                                 | 182.5022026                                     | 213.4317181                                       | 0.353032659                              |
| 0.075784133                                                 | 157.2272728                                     | 74.06930693                                       | 0.299703264                              |
| 0.011234963                                                 | 363.3658009                                     | 404.1601732                                       | 0.461077844                              |
| 0.00946742                                                  | 339.9193357                                     | 796.366548                                        | 0.405483405                              |
| 0.010999238                                                 | 261.7688172                                     | 896.6215054                                       | 0.300193673                              |
| 0.020408953                                                 | 318.3367698                                     | 235.604811                                        | 0.351874244                              |
| 0.015185126                                                 | 239.6076642                                     | 509.459854                                        | 0.36977058                               |
| 0.021134268                                                 | 184.5791246                                     | 560.973064                                        | 0.286403086                              |
| 0.023073434                                                 | 202.7111111                                     | 366.9753086                                       | 0.362254025                              |
| 0.027681154                                                 | 208.6283422                                     | 327.342246                                        | 0.41053787                               |
| 0.009899849                                                 | 253.7527473                                     | 1013.078755                                       | 0.157190154                              |
| 0.022160215                                                 | 252.0302013                                     | 230.2080537                                       | 0.426934097                              |
| 0.028645107                                                 | 200.6282383                                     | 738.7487047                                       | 0.331046312                              |
| 0.017832696                                                 | 291.5522388                                     | 216.2761194                                       | 0.4604811                                |
| 0.020045993                                                 | 167.99509                                       | 585.5531915                                       | 0.21813638                               |
| 0.007824562                                                 | 276.2513451                                     | 1219.71176                                        | 0.249042879                              |
| 0.035567324                                                 | 222.6096774                                     | 519.7580645                                       | 0.360465116                              |
| 0.015710506                                                 | 235.4206522                                     | 875.15                                            | 0.33687294                               |
| 0.029068033                                                 | 418.5226131                                     | 143.9447236                                       | 0.413721414                              |
| 0.02052098                                                  | 202.810219                                      | 376.5766423                                       | 0.341362126                              |
| 0.014877157                                                 | 281.0590278                                     | 261.3611111                                       | 0.414985591                              |
| 0.005631405                                                 | 380.2874172                                     | 688.2450331                                       | 0.217830352                              |
| 0.010754271                                                 | 240.8448276                                     | 502.3831418                                       | 0.364270761                              |
| 0.011669557                                                 | 275.3580902                                     | 711.2838196                                       | 0.427195467                              |
| 0.01271628                                                  | 270.6860987                                     | 630.1958146                                       | 0.2631786                                |
| 0.007268065                                                 | 278.9462475                                     | 960.3427992                                       | 0.310160428                              |
| 0.012752897                                                 | 230.6579882                                     | 1608.087574                                       | 0.284991568                              |
| 0.012638903                                                 | 259.8481183                                     | 703.1854839                                       | 0.365961633                              |
| 0.078533481                                                 | 386.1875                                        | 48.53125                                          | 0.615384615                              |
| 0.02589882                                                  | 303.9611111                                     | 152.5                                             | 0.542168675                              |
| 0.010578198                                                 | 264.4985294                                     | 587.3529412                                       | 0.336633663                              |
| 0.017450766                                                 | 243.6102719                                     | 951.8882175                                       | 0.344791667                              |
| 0.017595781                                                 | 200.8230616                                     | 953.4493042                                       | 0.29994037                               |
| 0.017709901                                                 | 283.6831683                                     | 253.8118812                                       | 0.362874251                              |
| 0.016886074                                                 | 248.2479784                                     | 353.4366577                                       | 0.353670162                              |
| 0.015726719                                                 | 220.6980306                                     | 404.4310722                                       | 0.310040706                              |
| 0.013460968                                                 | 300.8790932                                     | 362.6322418                                       | 0.416579224                              |
| 0.027718094                                                 | 235.3460925                                     | 560.907496                                        | 0.381851401                              |
| 0.01869372                                                  | 333.726477                                      | 382.356674                                        | 0.445853659                              |
| 0.009451341                                                 | 327.3977901                                     | 641.3480663                                       | 0.385516507                              |
| 0.038044578                                                 | 106.3955095                                     | 571.0552677                                       | 0.259874327                              |
| 0.009863377                                                 | 299.6918239                                     | 1363.030189                                       | 0.372714487                              |
| 0.035938841                                                 | 173.4329004                                     | 211.8658009                                       | 0.396226415                              |
| 0.084777716                                                 | 480.0447761                                     | 43.71641791                                       | 0.5                                      |
| 0.018242027                                                 | 361.9633028                                     | 161.9908257                                       | 0.438631791                              |
| 0.017264117                                                 | 234.4376784                                     | 979.605138                                        | 0.306950935                              |
| 0.018717029                                                 | 195.4385965                                     | 269.4491228                                       | 0.344619105                              |
| 0.007886441                                                 | 327.570626                                      | 1137.215088                                       | 0.326092646                              |
| 0.033502442                                                 | 198.4522613                                     | 176.4472362                                       | 0.336717428                              |
| 0.015215806                                                 | 189.5242356                                     | 1295.788963                                       | 0.205580254                              |
| 0.038321938                                                 | 271.2162791                                     | 357.4418605                                       | 0.489192264                              |
| 0.01770701                                                  | 406.2163743                                     | 769.8596491                                       | 0.467852257                              |
| 0.021776396                                                 | 397.4283088                                     | 384.5919118                                       | 0.420726991                              |
| 0.014769989                                                 | 264.8703072                                     | 264.5358362                                       | 0.35995086                               |
| 0.012479603                                                 | 228.1541502                                     | 243.1976285                                       | 0.287173666                              |
| 0.01662601                                                  | 236.8660598                                     | 716.8959688                                       | 0.362907032                              |
| 0.010507757                                                 | 280.232906                                      | 1748.376068                                       | 0.341730559                              |
| 0.008876858                                                 | 244.5231214                                     | 656.9364162                                       | 0.22394822                               |
| 0.009132914                                                 | 307.2540835                                     | 535.2323049                                       | 0.201757598                              |
| 0.020835543                                                 | 246.4862385                                     | 105.0733945                                       | 0.502304147                              |
| 0.012261976                                                 | 315.7419899                                     | 534.2411467                                       | 0.381841597                              |
| 0.015087861                                                 | 353.5604396                                     | 141.8131868                                       | 0.461928934                              |
| 0.007799372                                                 | 321.3679577                                     | 1073.802817                                       | 0.355333125                              |
| 0.047778647                                                 | 201.7393617                                     | 163.7978723                                       | 0.421524664                              |
| 0.018193708                                                 | 275.8715013                                     | 730.1399491                                       | 0.390850323                              |
| 0.012478883                                                 | 306.6316742                                     | 995.0886878                                       | 0.363486842                              |
| 0.015318309                                                 | 239.9380952                                     | 391.0714286                                       | 0.372010629                              |
| 0.012879826                                                 | 218.0292612                                     | 1285.580834                                       | 0.264512384                              |
| 0.005648402                                                 | 324.2703202                                     | 1559.341133                                       | 0.241810602                              |
| 0.004944461                                                 | 382.3683093                                     | 2216.282923                                       | 0.256427015                              |
| 0.018149649                                                 | 316.0752475                                     | 411.7089109                                       | 0.452508961                              |
| 0.019211695                                                 | 265.1531323                                     | 373.4593968                                       | 0.385854969                              |
| 0.053936117                                                 | 190.0522088                                     | 220.8072289                                       | 0.408196721                              |
| 0.014532451                                                 | 326.6652542                                     | 604.8587571                                       | 0.401360544                              |
| 0.018330315                                                 | 234.2050505                                     | 872.0181818                                       | 0.347856641                              |
| 0.012331642                                                 | 384.7295374                                     | 240.4448399                                       | 0.557539683                              |
| 0.014488786                                                 | 373.7708628                                     | 572.9123055                                       | 0.527218494                              |
| 0.0087651                                                   | 312.6551078                                     | 980.7956888                                       | 0.382163324                              |
| 0.075152294                                                 | 386.0886076                                     | 54.69620253                                       | 0.544827586                              |
| 0.011152528                                                 | 211.8791946                                     | 1011.490892                                       | 0.307578885                              |
| 0.00861493                                                  | 311.144208                                      | 962.9353822                                       | 0.231738495                              |
| 0.018475623                                                 | 226.3858025                                     | 306.5                                             | 0.416452442                              |
| 0.016014195                                                 | 410.114514                                      | 577.6311585                                       | 0.483891753                              |
| 0.040211854                                                 | 173.5692308                                     | 49.49230769                                       | 0.355191257                              |
| 0.083893425                                                 | 253.6833333                                     | 49.2                                              | 0.571428571                              |
| 0.006449594                                                 | 403.3544715                                     | 1108.660163                                       | 0.309433962                              |
| 0.013013075                                                 | 303.632716                                      | 314.154321                                        | 0.458923513                              |
| 0.01196735                                                  | 252.5504587                                     | 302.0336391                                       | 0.319960861                              |
| 0.017759319                                                 | 220.3825561                                     | 1084.493955                                       | 0.283129584                              |
| 0.020200895                                                 | 182.4105552                                     | 1392.584647                                       | 0.251291767                              |
| 0.060196706                                                 | 384.3285714                                     | 94.01428571                                       | 0.553359684                              |
| 0.016099094                                                 | 269.7424594                                     | 419.1670534                                       | 0.354440789                              |
| 0.0797877                                                   | 298.15625                                       | 54.78125                                          | 0.520325203                              |
| 0.027250688                                                 | 175.0526316                                     | 112.8195489                                       | 0.350923483                              |
| 0.010221856                                                 | 416.5747508                                     | 272.4950166                                       | 0.372986369                              |

| log.sigma.3.0.mm.3D_gldzm_IntensityVariabilityNormalized | log.sigma.3.0.mm.3D_gldzm_LowIntensitySmallDistanceEmphasis | log.sigma.3.0.mm.3D_gldzm_IntensityVariability |
|----------------------------------------------------------|-------------------------------------------------------------|------------------------------------------------|
| 0.045676589                                              | 0.009750154                                                 | 13.52027027                                    |
| 0.048065269                                              | 0.007717113                                                 | 26.62815884                                    |
| 0.055064547                                              | 0.018696256                                                 | 10.84771574                                    |
| 0.045209921                                              | 0.010686394                                                 | 47.5608365                                     |
| 0.042205306                                              | 0.017412627                                                 | 6.288590604                                    |
| 0.06425508                                               | 0.016690094                                                 | 14.58590308                                    |
| 0.068326635                                              | 0.01092417                                                  | 6.900990099                                    |
| 0.042137516                                              | 0.008625318                                                 | 19.46753247                                    |
| 0.041782934                                              | 0.008748809                                                 | 35.22301305                                    |
| 0.05207076                                               | 0.010172393                                                 | 48.42580645                                    |
| 0.059812709                                              | 0.005034965                                                 | 17.40549828                                    |
| 0.047178859                                              | 0.013949834                                                 | 25.8540146                                     |
| 0.052511648                                              | 0.0201768                                                   | 31.19191919                                    |
| 0.055107453                                              | 0.011862425                                                 | 22.31851852                                    |
| 0.05158855                                               | 0.014132029                                                 | 19.29411765                                    |
| 0.055424734                                              | 0.008116586                                                 | 60.52380952                                    |
| 0.05033557                                               | 0.011565881                                                 | 15                                             |
| 0.049531531                                              | 0.020476593                                                 | 38.23834197                                    |
| 0.045862107                                              | 0.013295242                                                 | 12.29104478                                    |
| 0.061777934                                              | 0.015707971                                                 | 37.74631751                                    |
| 0.058125335                                              | 0.006901211                                                 | 75.62106072                                    |
| 0.050182102                                              | 0.01115228                                                  | 31.11290323                                    |
| 0.056157845                                              | 0.008166948                                                 | 51.66521739                                    |
| 0.04936744                                               | 0.004284977                                                 | 9.824120603                                    |
| 0.060247098                                              | 0.010140708                                                 | 24.76155718                                    |
| 0.045476466                                              | 0.010665895                                                 | 13.09722222                                    |
| 0.053788869                                              | 0.005125685                                                 | 40.61059603                                    |
| 0.053478369                                              | 0.00985465                                                  | 27.91570881                                    |
| 0.04714731                                               | 0.009672703                                                 | 35.54907162                                    |
| 0.048245937                                              | 0.010129263                                                 | 32.27653214                                    |
| 0.06076141                                               | 0.006695823                                                 | 59.91075051                                    |
| 0.055032387                                              | 0.009068617                                                 | 93.00473373                                    |
| 0.045395421                                              | 0.011863786                                                 | 33.77419355                                    |
| 0.049804688                                              | 0.007258406                                                 | 3.1875                                         |
| 0.045925926                                              | 0.015645174                                                 | 8.266666667                                    |
| 0.051262976                                              | 0.008991236                                                 | 34.85882353                                    |
| 0.04784245                                               | 0.012695773                                                 | 47.50755287                                    |
| 0.056245035                                              | 0.015808816                                                 | 56.58250497                                    |
| 0.05105164                                               | 0.011042263                                                 | 15.46864686                                    |
| 0.050602655                                              | 0.016081811                                                 | 18.77358491                                    |
| 0.053143659                                              | 0.01268881                                                  | 24.28665208                                    |
| 0.045600188                                              | 0.009984812                                                 | 18.10327456                                    |
| 0.049451961                                              | 0.014801038                                                 | 31.00637959                                    |
| 0.04535813                                               | 0.005767633                                                 | 20.72866521                                    |
| 0.050395287                                              | 0.006271286                                                 | 36.48618785                                    |
| 0.071921394                                              | 0.03584346                                                  | 41.64248705                                    |
| 0.047727542                                              | 0.007102374                                                 | 75.88679245                                    |
| 0.053765859                                              | 0.032997587                                                 | 12.41991342                                    |
| 0.047003787                                              | 0.006766142                                                 | 3.149253731                                    |
| 0.043220268                                              | 0.012718414                                                 | 9.422018349                                    |
| 0.052399916                                              | 0.009909459                                                 | 55.07231208                                    |
| 0.058393352                                              | 0.017402383                                                 | 16.64210526                                    |
| 0.047633648                                              | 0.006394108                                                 | 59.35152488                                    |
| 0.05967021                                               | 0.014357697                                                 | 11.87437186                                    |
| 0.056083004                                              | 0.014518376                                                 | 75.20730798                                    |
| 0.04355868                                               | 0.021183987                                                 | 18.73023256                                    |
| 0.041036368                                              | 0.004114074                                                 | 42.10331384                                    |
| 0.043144464                                              | 0.005013137                                                 | 23.47058824                                    |
| 0.052382672                                              | 0.011956461                                                 | 15.34812287                                    |
| 0.066912465                                              | 0.011377809                                                 | 16.92885375                                    |
| 0.047985917                                              | 0.012717749                                                 | 36.90117035                                    |
| 0.045762679                                              | 0.00968845                                                  | 85.66773504                                    |
| 0.062000902                                              | 0.008093109                                                 | 42.90462428                                    |
| 0.054825248                                              | 0.008669761                                                 | 30.20871143                                    |
| 0.0568134                                                | 0.019789391                                                 | 6.19266055                                     |
| 0.044171887                                              | 0.008472653                                                 | 26.19392917                                    |
| 0.046371211                                              | 0.01063649                                                  | 8.43956044                                     |
| 0.046306226                                              | 0.006843971                                                 | 52.60387324                                    |
| 0.057661838                                              | 0.023755718                                                 | 10.84042553                                    |
| 0.047293929                                              | 0.009585406                                                 | 37.17302799                                    |
| 0.048628816                                              | 0.005724598                                                 | 53.73484163                                    |
| 0.048843537                                              | 0.013625584                                                 | 20.51428571                                    |
| 0.053561079                                              | 0.011253483                                                 | 73.21799561                                    |
| 0.059663848                                              | 0.005128039                                                 | 96.89408867                                    |
| 0.049134538                                              | 0.00455223                                                  | 115.6627018                                    |
| 0.041733163                                              | 0.010569598                                                 | 21.07524752                                    |
| 0.049843616                                              | 0.009493523                                                 | 21.48259861                                    |
| 0.051015306                                              | 0.027745142                                                 | 12.70281124                                    |
| 0.048828561                                              | 0.006342424                                                 | 34.57062147                                    |
| 0.052692582                                              | 0.008850398                                                 | 52.16565657                                    |
| 0.041096237                                              | 0.009785297                                                 | 11.5480427                                     |
| 0.040410204                                              | 0.008916876                                                 | 28.57001414                                    |
| 0.0465907                                                | 0.007932984                                                 | 49.71227741                                    |
| 0.052395449                                              | 0.006649399                                                 | 4.139240506                                    |
| 0.057856375                                              | 0.010321852                                                 | 60.34419942                                    |
| 0.054712577                                              | 0.005630092                                                 | 69.43026005                                    |
| 0.049782807                                              | 0.017575188                                                 | 16.12962963                                    |
| 0.043785383                                              | 0.004746689                                                 | 32.8828229                                     |
| 0.070769231                                              | 0.025598223                                                 | 4.6                                            |
| 0.057222222                                              | 0.013735909                                                 | 3.433333333                                    |
| 0.044981162                                              | 0.005627606                                                 | 55.32682927                                    |
| 0.043971955                                              | 0.011826534                                                 | 14.24691358                                    |
| 0.053970392                                              | 0.010491469                                                 | 17.64831804                                    |
| 0.053033489                                              | 0.012975661                                                 | 61.41278066                                    |
| 0.057458586                                              | 0.015762321                                                 | 83.83207676                                    |
| 0.035714286                                              | 0.017845979                                                 | 5                                              |
| 0.048293237                                              | 0.015864998                                                 | 20.81438515                                    |
| 0.053710938                                              | 0.008910105                                                 | 3.4375                                         |
| 0.064729493                                              | 0.019953115                                                 | 8.609022556                                    |
| 0.039436651                                              | 0.008332487                                                 | 11.87043189                                    |

| log.sigma.3.0.mm.3D_gldzm_HighIntensityLargeDistanceEmphasis | log.sigma.3.0.mm.3D_gldzm_SmallDistanceEmphasis | log.sigma.3.0.mm.3D_gldzm_SumVariance | log.sigma.3.0.mm.3D_gldzm_Homogeneity1 |
|--------------------------------------------------------------|-------------------------------------------------|---------------------------------------|----------------------------------------|
| 361.375                                                      | 0.959459459                                     | 728.4668706                           | 0.305984702                            |
| 328.1498195                                                  | 0.95532491                                      | 665.8054846                           | 0.395909433                            |
| 206.5939086                                                  | 0.950507614                                     | 330.7462861                           | 0.317850265                            |
| 347.8878327                                                  | 0.951520913                                     | 832.4830988                           | 0.300692196                            |
| 338.1879195                                                  | 0.944630872                                     | 801.9825019                           | 0.294681188                            |
| 190.2334802                                                  | 0.976872247                                     | 345.815498                            | 0.339274458                            |
| 174.2475248                                                  | 0.881188119                                     | 323.2082118                           | 0.382834215                            |
| 399.7359307                                                  | 0.949675325                                     | 832.5002242                           | 0.265863377                            |
| 362.6132859                                                  | 0.978647687                                     | 825.7630724                           | 0.29653578                             |
| 269.6849462                                                  | 0.986290323                                     | 536.7960932                           | 0.367830776                            |
| 387.0274914                                                  | 0.920103093                                     | 856.724311                            | 0.320589314                            |
| 257.75                                                       | 0.972627737                                     | 484.8233259                           | 0.338841277                            |
| 198.473064                                                   | 0.978535354                                     | 394.2788612                           | 0.357402047                            |
| 218.5111111                                                  | 0.962962963                                     | 453.0644067                           | 0.326503137                            |
| 234.5935829                                                  | 0.94986631                                      | 514.5432787                           | 0.317199124                            |
| 277.4532967                                                  | 0.971840659                                     | 560.8137151                           | 0.517476582                            |
| 300.8456376                                                  | 0.901845638                                     | 575.7718624                           | 0.295940166                            |
| 203.4650259                                                  | 0.983484456                                     | 354.0807725                           | 0.3470277                              |
| 343.2238806                                                  | 0.918843284                                     | 664.9665231                           | 0.279770378                            |
| 175.188216                                                   | 0.984042553                                     | 268.5165509                           | 0.432967869                            |
| 298.1091468                                                  | 0.975787855                                     | 600.7807941                           | 0.409368108                            |
| 255.9435484                                                  | 0.933467742                                     | 470.5568244                           | 0.315966343                            |
| 241.4793478                                                  | 0.98125                                         | 456.1422959                           | 0.359115585                            |
| 533.8040201                                                  | 0.875628141                                     | 1253.568138                           | 0.300190274                            |
| 228.2919708                                                  | 0.967153285                                     | 371.6732119                           | 0.372751653                            |
| 291.7986111                                                  | 0.963541667                                     | 559.0030069                           | 0.312643608                            |
| 442.0675497                                                  | 0.965231788                                     | 923.7152317                           | 0.444220799                            |
| 248.954023                                                   | 0.985632184                                     | 463.3466349                           | 0.354424006                            |
| 290.4615385                                                  | 0.978116711                                     | 784.3309002                           | 0.30021616                             |
| 286.5246637                                                  | 0.977578475                                     | 566.6635747                           | 0.410932786                            |
| 286.6257606                                                  | 0.990111562                                     | 579.7026379                           | 0.373264253                            |
| 243.1408284                                                  | 0.981360947                                     | 484.498408                            | 0.391147072                            |
| 276.6948925                                                  | 0.978830645                                     | 651.1498154                           | 0.314004506                            |
| 420.59375                                                    | 0.89453125                                      | 1039.803928                           | 0.246194256                            |
| 336.6611111                                                  | 0.9375                                          | 739.0450188                           | 0.264600967                            |
| 309.4764706                                                  | 0.944852941                                     | 674.4089103                           | 0.326450328                            |
| 252.8640483                                                  | 0.984138973                                     | 488.0527476                           | 0.339177636                            |
| 212.9095427                                                  | 0.979870775                                     | 449.8052501                           | 0.367527939                            |
| 330.6534653                                                  | 0.933168317                                     | 758.469222                            | 0.320206938                            |
| 258.7439353                                                  | 0.98180593                                      | 524.1601188                           | 0.32485996                             |
| 252.1291028                                                  | 0.95404814                                      | 479.1147962                           | 0.377057152                            |
| 316.0755668                                                  | 0.965994962                                     | 720.7885672                           | 0.296711771                            |
| 251.3795853                                                  | 0.958133971                                     | 614.3439865                           | 0.305290711                            |
| 370.6586433                                                  | 0.932713348                                     | 765.7320076                           | 0.288664178                            |
| 369.7334254                                                  | 0.95441989                                      | 894.4481655                           | 0.30699914                             |
| 107.4991364                                                  | 0.994818653                                     | 135.5211248                           | 0.410686593                            |
| 357.9899371                                                  | 0.941981132                                     | 768.7359134                           | 0.316568125                            |
| 183.1601732                                                  | 0.967532468                                     | 307.7478469                           | 0.309191717                            |
| 559.0746269                                                  | 0.832089552                                     | 1318.197062                           | 0.265963172                            |
| 430.4816514                                                  | 0.88646789                                      | 930.005993                            | 0.287557538                            |
| 246.4633682                                                  | 0.973596575                                     | 497.5509406                           | 0.37160037                             |
| 203.6175439                                                  | 0.978947368                                     | 420.441595                            | 0.322044853                            |
| 353.8723917                                                  | 0.965690209                                     | 781.0574564                           | 0.345614477                            |
| 207.7839196                                                  | 0.954773869                                     | 423.5560562                           | 0.347075393                            |
| 195.6137211                                                  | 0.987136465                                     | 369.5677173                           | 0.459429492                            |
| 311.0186047                                                  | 0.930232558                                     | 635.2659161                           | 0.270081475                            |
| 494.6783626                                                  | 0.890350877                                     | 1020.537235                           | 0.259091885                            |
| 498.2316176                                                  | 0.866268382                                     | 1121.708446                           | 0.290632991                            |
| 285.9931741                                                  | 0.961604096                                     | 574.5200281                           | 0.345742868                            |
| 234.7233202                                                  | 0.985177866                                     | 527.7519259                           | 0.373696048                            |
| 250.6449935                                                  | 0.9736671                                       | 443.2237391                           | 0.319904842                            |
| 308.4316239                                                  | 0.974358974                                     | 677.2035847                           | 0.339238395                            |
| 258.6430636                                                  | 0.980491329                                     | 569.0258147                           | 0.426253021                            |
| 315.2032668                                                  | 0.989110708                                     | 769.3667822                           | 0.455711561                            |
| 250.587156                                                   | 0.986238532                                     | 523.4209228                           | 0.296930398                            |
| 349.6374368                                                  | 0.96079258                                      | 762.7068674                           | 0.316698053                            |
| 408.8296703                                                  | 0.90521978                                      | 841.7393405                           | 0.283768274                            |
| 334.6012324                                                  | 0.978873239                                     | 714.4252705                           | 0.321870619                            |
| 217.3297872                                                  | 0.948138298                                     | 382.1555813                           | 0.310396259                            |
| 294.6157761                                                  | 0.972328244                                     | 615.1165149                           | 0.316912882                            |
| 331.5547511                                                  | 0.960633484                                     | 684.3922908                           | 0.330411952                            |
| 251.7095238                                                  | 0.973214286                                     | 492.6608551                           | 0.31431254                             |
| 229.4257498                                                  | 0.97695684                                      | 406.4121186                           | 0.400813992                            |
| 338.7272167                                                  | 0.984759852                                     | 734.8495267                           | 0.408926142                            |
| 422.8759558                                                  | 0.977378929                                     | 1034.722462                           | 0.404925382                            |
| 368.2871287                                                  | 0.922772727                                     | 791.5984139                           | 0.268693987                            |
| 292.12529                                                    | 0.946055684                                     | 644.8317037                           | 0.30885865                             |
| 204.8232932                                                  | 0.954819277                                     | 303.9789726                           | 0.307509907                            |
| 363.3855932                                                  | 0.940677966                                     | 802.4233368                           | 0.297748187                            |
| 261.0656566                                                  | 0.952272727                                     | 539.9289088                           | 0.334544726                            |
| 422.6939502                                                  | 0.941281139                                     | 845.1705599                           | 0.251091546                            |
| 462.9306931                                                  | 0.920438472                                     | 993.9891029                           | 0.257250575                            |
| 348.4470478                                                  | 0.96836926                                      | 846.9816485                           | 0.321492649                            |
| 435.721519                                                   | 0.857594937                                     | 1053.97971                            | 0.277522081                            |
| 218.0258869                                                  | 0.988494727                                     | 450.9015023                           | 0.356660327                            |
| 467.7115839                                                  | 0.894799054                                     | 739.2871716                           | 0.39981102                             |
| 240.9783951                                                  | 0.979166667                                     | 417.812503                            | 0.3080367                              |
| 488.2623169                                                  | 0.900133156                                     | 1103.575475                           | 0.264306985                            |
| 209.8                                                        | 0.896153846                                     | 425.9565055                           | 0.354724862                            |
| 275.6833333                                                  | 0.925                                           | 647.4436348                           | 0.273990769                            |
| 451.2813008                                                  | 0.96097561                                      | 1030.240858                           | 0.365427462                            |
| 308.2716049                                                  | 0.988425926                                     | 576.2233952                           | 0.277976171                            |
| 273.4311927                                                  | 0.970183486                                     | 641.3055563                           | 0.390648707                            |
| 232.6908463                                                  | 0.975388601                                     | 476.1305602                           | 0.383134035                            |
| 190.0370117                                                  | 0.982522276                                     | 341.1955479                           | 0.394155969                            |
| 480.7357143                                                  | 0.844642857                                     | 978.5765366                           | 0.234645177                            |
| 279.1670534                                                  | 0.989559165                                     | 815.1958093                           | 0.329468402                            |
| 304.671875                                                   | 0.94140625                                      | 676.3671825                           | 0.257561221                            |
| 199.0075188                                                  | 0.937969925                                     | 405.8220964                           | 0.342932429                            |
| 437.654485                                                   | 0.962624585                                     | 879.667656                            | 0.320777351                            |

| log.sigma.3.0.mm.3D_glcM_Homogeneity2 | log.sigma.3.0.mm.3D_glcM_ClusterShade | log.sigma.3.0.mm.3D_glcM_MaximumProbability | log.sigma.3.0.mm.3D_glcM_Ldmn | log.sigma.3.0.mm.3D_glcM_SumVariance2 |
|---------------------------------------|---------------------------------------|---------------------------------------------|-------------------------------|---------------------------------------|
| 0.215742272                           | 227.087081                            | 0.011504596                                 | 0.970734003                   | 92.89069443                           |
| 0.322031444                           | 179.798634                            | 0.040547434                                 | 0.979270983                   | 63.21073665                           |
| 0.22742676                            | 337.2387907                           | 0.017132443                                 | 0.965205888                   | 72.17453373                           |
| 0.212246214                           | -85.55979799                          | 0.008920784                                 | 0.969721074                   | 93.02047016                           |
| 0.201850535                           | 92.50138006                           | 0.015682748                                 | 0.967172118                   | 123.1832801                           |
| 0.249061926                           | 69.98953389                           | 0.017156244                                 | 0.966652895                   | 55.02119276                           |
| 0.297937488                           | 16.29339167                           | 0.027708875                                 | 0.972624622                   | 38.74404968                           |
| 0.175271459                           | 171.4478719                           | 0.009216057                                 | 0.966290856                   | 120.4578344                           |
| 0.206880429                           | 221.4129737                           | 0.009257506                                 | 0.97126636                    | 108.0762037                           |
| 0.284722616                           | 227.5263013                           | 0.018111436                                 | 0.980340738                   | 59.69251232                           |
| 0.230196823                           | -130.0840005                          | 0.014717534                                 | 0.965067105                   | 63.58903255                           |
| 0.251769362                           | 335.3906437                           | 0.014823459                                 | 0.973696682                   | 81.16127788                           |
| 0.270030414                           | 305.4007994                           | 0.013075059                                 | 0.976819083                   | 68.6054366                            |
| 0.235184636                           | 49.80047991                           | 0.011532425                                 | 0.970247352                   | 76.82616848                           |
| 0.224997134                           | 91.74960133                           | 0.013068596                                 | 0.965298879                   | 68.83385439                           |
| 0.463411587                           | 116.7904191                           | 0.132853133                                 | 0.990268744                   | 38.99224512                           |
| 0.204432454                           | 14.11364625                           | 0.011284683                                 | 0.963556333                   | 96.62637485                           |
| 0.262597637                           | 484.2726252                           | 0.013043657                                 | 0.969969614                   | 87.16919878                           |
| 0.188417593                           | -3.832363166                          | 0.010766441                                 | 0.958691134                   | 129.7009392                           |
| 0.361217904                           | 110.7119436                           | 0.042269112                                 | 0.976962628                   | 44.28098628                           |
| 0.332415256                           | 116.4710974                           | 0.035233708                                 | 0.985075464                   | 40.83296221                           |
| 0.223940797                           | 361.423515                            | 0.010233228                                 | 0.977590306                   | 82.91321187                           |
| 0.273572117                           | 287.7997791                           | 0.017767279                                 | 0.974802952                   | 65.44919196                           |
| 0.208460912                           | -489.9371763                          | 0.014510134                                 | 0.970247407                   | 89.17795931                           |
| 0.289578891                           | 166.6455125                           | 0.024947599                                 | 0.978036745                   | 43.47777812                           |
| 0.226524084                           | 342.9918268                           | 0.014695149                                 | 0.966596332                   | 87.45682089                           |
| 0.374853168                           | 154.7181322                           | 0.070847019                                 | 0.987531754                   | 40.48604625                           |
| 0.269200204                           | 333.3004392                           | 0.019292729                                 | 0.974409393                   | 63.94691025                           |
| 0.211729856                           | -264.5635943                          | 0.012984761                                 | 0.96551858                    | 105.8806293                           |
| 0.338704043                           | 129.4647124                           | 0.047869478                                 | 0.985378885                   | 59.30237874                           |
| 0.290612674                           | 233.0871651                           | 0.021438343                                 | 0.979475873                   | 52.16730434                           |
| 0.311612068                           | 229.7945004                           | 0.034134397                                 | 0.980091373                   | 65.20098059                           |
| 0.225256988                           | 12.76761421                           | 0.009927881                                 | 0.972769106                   | 90.82122121                           |
| 0.154119439                           | -46.22905288                          | 0.025097012                                 | 0.951111743                   | 120.1506458                           |
| 0.171295369                           | -359.8267582                          | 0.01390694                                  | 0.950415439                   | 114.9358155                           |
| 0.237625562                           | -22.02258913                          | 0.010882747                                 | 0.972428752                   | 83.59858834                           |
| 0.255695253                           | 393.6159152                           | 0.015402799                                 | 0.976447717                   | 83.99723149                           |
| 0.282469766                           | 45.65124141                           | 0.015290109                                 | 0.97459566                    | 55.39719833                           |
| 0.230421454                           | -190.7295751                          | 0.016705268                                 | 0.972880262                   | 73.52770902                           |
| 0.236315762                           | 28.52142245                           | 0.013706568                                 | 0.968467117                   | 79.9439346                            |
| 0.295128314                           | 88.22050187                           | 0.020640869                                 | 0.977237952                   | 61.47718454                           |
| 0.205363645                           | 150.9016859                           | 0.011178862                                 | 0.970981422                   | 102.2580176                           |
| 0.215037157                           | -109.6877626                          | 0.010630621                                 | 0.967304974                   | 88.16055098                           |
| 0.19780072                            | 139.3401483                           | 0.009458692                                 | 0.969088465                   | 109.40747                             |
| 0.214118681                           | -40.16716985                          | 0.011675379                                 | 0.972622901                   | 69.28303412                           |
| 0.333714993                           | 137.6853529                           | 0.02837359                                  | 0.973602563                   | 35.60406438                           |
| 0.226219404                           | 63.85360067                           | 0.009324332                                 | 0.973493546                   | 75.28395808                           |
| 0.21792988                            | 85.36985562                           | 0.011905447                                 | 0.960699611                   | 78.27402916                           |
| 0.181070211                           | -618.8001586                          | 0.032633634                                 | 0.952555972                   | 108.7595479                           |
| 0.199279004                           | -341.5514987                          | 0.019168126                                 | 0.971987512                   | 119.6887116                           |
| 0.288862544                           | 188.4869694                           | 0.027873493                                 | 0.980935744                   | 62.06489525                           |
| 0.236157603                           | 8.121601582                           | 0.017164186                                 | 0.948574106                   | 86.5820569                            |
| 0.263231306                           | 196.5826356                           | 0.020656602                                 | 0.977722893                   | 74.24493903                           |
| 0.256570182                           | -28.9445831                           | 0.017062401                                 | 0.969022724                   | 58.33772224                           |
| 0.396573645                           | 175.9984441                           | 0.017297498                                 | 0.978501587                   | 56.59408577                           |
| 0.179224883                           | 48.34685461                           | 0.009546126                                 | 0.960734919                   | 115.3765445                           |
| 0.168987735                           | 22.12150006                           | 0.006536994                                 | 0.96448694                    | 118.6772755                           |
| 0.200609896                           | -414.0526009                          | 0.013426396                                 | 0.969233655                   | 95.33798701                           |
| 0.259145567                           | 185.9739587                           | 0.019361437                                 | 0.971426822                   | 75.35810472                           |
| 0.287155175                           | 20.45928097                           | 0.015473138                                 | 0.977950499                   | 47.17765953                           |
| 0.232484664                           | 433.9544165                           | 0.016165946                                 | 0.970160849                   | 90.36527712                           |
| 0.255578906                           | 394.764658                            | 0.016547218                                 | 0.980158809                   | 91.88472639                           |
| 0.353025253                           | 91.31492748                           | 0.040299708                                 | 0.985339609                   | 41.72489438                           |
| 0.391333761                           | 87.8680166                            | 0.062988261                                 | 0.98222814                    | 41.13509817                           |
| 0.202963826                           | -114.906533                           | 0.01830902                                  | 0.953788473                   | 81.48714991                           |
| 0.230690794                           | 347.6144694                           | 0.017176186                                 | 0.975433211                   | 86.87704815                           |
| 0.192935822                           | -374.2627607                          | 0.01894543                                  | 0.965978153                   | 91.54894411                           |
| 0.236360627                           | 236.678218                            | 0.010423013                                 | 0.971424675                   | 98.82513821                           |
| 0.220038724                           | -12.87337171                          | 0.017644249                                 | 0.959078058                   | 82.26319651                           |
| 0.230445965                           | 288.9828358                           | 0.011708188                                 | 0.97119478                    | 86.91507451                           |
| 0.245050704                           | 270.9382443                           | 0.012525508                                 | 0.971559549                   | 86.67240305                           |
| 0.225265648                           | 245.1510001                           | 0.012051443                                 | 0.97012988                    | 92.73765384                           |
| 0.325064221                           | 260.5731396                           | 0.028131558                                 | 0.977696964                   | 58.1702484                            |
| 0.334131355                           | 132.6270305                           | 0.03327609                                  | 0.982378114                   | 48.86632124                           |
| 0.33033276                            | 249.8346636                           | 0.03656268                                  | 0.987328068                   | 51.78966887                           |
| 0.177567363                           | -83.06926071                          | 0.009848378                                 | 0.963140502                   | 113.4635894                           |
| 0.21875947                            | 62.9586717                            | 0.011872055                                 | 0.971460179                   | 77.93649371                           |
| 0.218085789                           | 553.9141699                           | 0.01642851                                  | 0.959210176                   | 93.96051851                           |
| 0.207793356                           | 99.29838305                           | 0.011258145                                 | 0.965597911                   | 88.21633743                           |
| 0.248268166                           | 196.586242                            | 0.0136703                                   | 0.973892678                   | 74.14435728                           |
| 0.160936735                           | 263.7124941                           | 0.010984965                                 | 0.962371381                   | 122.8316391                           |
| 0.165718139                           | -68.25873786                          | 0.007390507                                 | 0.963915032                   | 121.1227869                           |
| 0.236590696                           | 19.48852183                           | 0.016311479                                 | 0.972815425                   | 88.08379467                           |
| 0.188316264                           | -549.3199381                          | 0.026905061                                 | 0.953812103                   | 98.1616114                            |
| 0.2771064232                          | 172.6572475                           | 0.01504226                                  | 0.972763988                   | 62.61479481                           |
| 0.322257209                           | 193.4725781                           | 0.035224366                                 | 0.986446251                   | 48.32025815                           |
| 0.216899074                           | 462.8017332                           | 0.013407724                                 | 0.964341356                   | 97.0803299                            |
| 0.174179265                           | -374.062144                           | 0.00903519                                  | 0.962446515                   | 124.4777539                           |
| 0.267179997                           | 20.1630186                            | 0.029447605                                 | 0.95783493                    | 43.20228692                           |
| 0.179626395                           | -167.5243285                          | 0.025165511                                 | 0.946523004                   | 78.50420745                           |
| 0.286462814                           | 175.6997436                           | 0.031034916                                 | 0.98141408                    | 75.19025981                           |
| 0.18713627                            | 554.6215406                           | 0.012697492                                 | 0.964333285                   | 104.9672007                           |
| 0.312283214                           | 85.8956439                            | 0.069500657                                 | 0.97441231                    | 57.01388279                           |
| 0.303172098                           | 125.8509953                           | 0.03381219                                  | 0.978620411                   | 56.85619677                           |
| 0.31479736                            | 101.3830776                           | 0.017963705                                 | 0.978484266                   | 50.62677626                           |
| 0.148732959                           | 291.5652064                           | 0.015184178                                 | 0.947104625                   | 204.4059539                           |
| 0.239870424                           | -79.2599803                           | 0.013848952                                 | 0.971842202                   | 72.27527629                           |
| 0.165015846                           | -280.5938175                          | 0.023502348                                 | 0.941279388                   | 110.7177745                           |
| 0.250909751                           | -62.73517814                          | 0.022895047                                 | 0.967992155                   | 67.43397134                           |
| 0.235098213                           | 461.6875051                           | 0.018003536                                 | 0.977263437                   | 85.26382416                           |

| log.sigma.3.0.mm.3D_glc_m_Contrast | log.sigma.3.0.mm.3D_glc_m_DifferenceEntropy | log.sigma.3.0.mm.3D_glc_m_InverseVariance | log.sigma.3.0.mm.3D_glc_m_Entropy | log.sigma.3.0.mm.3D_glc_m_Dissimilarity |
|------------------------------------|---------------------------------------------|-------------------------------------------|-----------------------------------|-----------------------------------------|
| 32.81891515                        | 3.548966215                                 | 0.220305699                               | 8.175099532                       | 4.443721867                             |
| 24.64424333                        | 3.32917565                                  | 0.291950903                               | 7.860196456                       | 3.485939935                             |
| 28.28576218                        | 3.443778089                                 | 0.233065019                               | 7.648193214                       | 4.121879966                             |
| 38.60747945                        | 3.691347353                                 | 0.213532659                               | 8.691424105                       | 4.763678436                             |
| 35.09838381                        | 3.560554467                                 | 0.20361833                                | 7.989793125                       | 4.611927948                             |
| 21.20269654                        | 3.278866531                                 | 0.248928302                               | 7.68375398                        | 3.61210797                              |
| 14.59388211                        | 2.961875481                                 | 0.304147173                               | 6.949476057                       | 2.913287356                             |
| 47.95733519                        | 3.829039298                                 | 0.176266874                               | 8.696009318                       | 5.500592005                             |
| 38.5667385                         | 3.702330375                                 | 0.206796524                               | 8.758354952                       | 4.793609506                             |
| 21.78576336                        | 3.303635944                                 | 0.28241182                                | 7.92314107                        | 3.435344082                             |
| 26.0943626                         | 3.39332812                                  | 0.233014821                               | 7.842250176                       | 4.018131647                             |
| 25.97811414                        | 3.403245305                                 | 0.255688034                               | 8.185657588                       | 3.84876967                              |
| 19.80253189                        | 3.234942719                                 | 0.271361629                               | 7.953819171                       | 3.384505453                             |
| 23.7542163                         | 3.35064628                                  | 0.243411641                               | 8.048355867                       | 3.814839517                             |
| 26.17100371                        | 3.419690756                                 | 0.234545618                               | 8.0953293                         | 3.996286198                             |
| 13.50325681                        | 2.835987579                                 | 0.348000833                               | 6.807529775                       | 2.271793911                             |
| 34.17433794                        | 3.539424952                                 | 0.209529586                               | 8.219250295                       | 4.588904974                             |
| 26.28342426                        | 3.411212486                                 | 0.26334964                                | 8.241783714                       | 3.823288003                             |
| 42.08927506                        | 3.695156382                                 | 0.19370605                                | 8.372085659                       | 5.078534751                             |
| 14.62448736                        | 3.027899174                                 | 0.323730155                               | 7.420503343                       | 2.721448473                             |
| 16.26164134                        | 3.12475183                                  | 0.308126103                               | 7.515657993                       | 2.920236891                             |
| 27.97093329                        | 3.472008295                                 | 0.227980959                               | 8.298620151                       | 4.094750393                             |
| 21.63305243                        | 3.306909572                                 | 0.266894639                               | 7.997471052                       | 3.50232062                              |
| 33.57290302                        | 3.563281324                                 | 0.215524979                               | 7.972782259                       | 4.494788478                             |
| 20.17855107                        | 3.249799137                                 | 0.284889618                               | 7.500422486                       | 3.319927393                             |
| 38.4638861                         | 3.654414034                                 | 0.226080458                               | 8.162834976                       | 4.656861829                             |
| 15.31945229                        | 3.054796392                                 | 0.321219012                               | 7.265241166                       | 2.712032371                             |
| 23.68264812                        | 3.356768883                                 | 0.266853915                               | 7.849414441                       | 3.629174736                             |
| 36.80299092                        | 3.621077851                                 | 0.219019252                               | 8.419824236                       | 4.691580615                             |
| 22.58500706                        | 3.282804268                                 | 0.29719671                                | 7.791760853                       | 3.294156786                             |
| 19.919619                          | 3.258192728                                 | 0.282812726                               | 7.763386645                       | 3.32862454                              |
| 19.3489182                         | 3.226183035                                 | 0.282804231                               | 7.95278402                        | 3.223350054                             |
| 32.44225947                        | 3.567807851                                 | 0.232952435                               | 8.489902094                       | 4.349148657                             |
| 57.64354108                        | 3.749975794                                 | 0.161264214                               | 6.729850129                       | 6.017531631                             |
| 45.15846561                        | 3.716052898                                 | 0.186886318                               | 7.927913259                       | 5.293346461                             |
| 27.13507607                        | 3.451797458                                 | 0.243172683                               | 8.30414766                        | 4.004251968                             |
| 31.41336399                        | 3.535787531                                 | 0.252808924                               | 8.288119544                       | 4.144916238                             |
| 18.74837761                        | 3.222350888                                 | 0.280822432                               | 7.910021986                       | 3.283863329                             |
| 28.29813959                        | 3.386926659                                 | 0.231915123                               | 8.01961136                        | 4.124597418                             |
| 29.42343802                        | 3.507567873                                 | 0.232356773                               | 8.204056224                       | 4.147619288                             |
| 21.09150565                        | 3.26792851                                  | 0.286645243                               | 7.886260769                       | 3.34063847                              |
| 34.59392054                        | 3.606648762                                 | 0.213186234                               | 8.397934372                       | 4.585159015                             |
| 32.46956498                        | 3.541450296                                 | 0.218781331                               | 8.346997672                       | 4.443768801                             |
| 39.53540802                        | 3.687640952                                 | 0.206875831                               | 8.549324795                       | 4.862853863                             |
| 28.62809542                        | 3.488063744                                 | 0.222198897                               | 8.269946776                       | 4.204455895                             |
| 14.11885602                        | 2.999780232                                 | 0.325856937                               | 7.153817107                       | 2.766948404                             |
| 29.67608336                        | 3.52806449                                  | 0.232092467                               | 8.470381088                       | 4.184004852                             |
| 29.82346752                        | 3.493671648                                 | 0.219869057                               | 7.995889235                       | 4.28329598                              |
| 59.67515955                        | 3.79041184                                  | 0.191470848                               | 6.821166032                       | 5.968870067                             |
| 41.85777242                        | 3.699445731                                 | 0.211850976                               | 8.044485258                       | 5.009116292                             |
| 20.94356979                        | 3.292233678                                 | 0.274394684                               | 8.007209905                       | 3.408162934                             |
| 31.75289162                        | 3.513568452                                 | 0.234218371                               | 7.869212019                       | 4.328099568                             |
| 29.52312058                        | 3.493012704                                 | 0.255863929                               | 8.326225022                       | 4.035236721                             |
| 19.7406545                         | 3.234161303                                 | 0.261056778                               | 7.67734272                        | 3.439700088                             |
| 18.79964317                        | 3.095716722                                 | 0.32301078                                | 7.50450118                        | 2.863015071                             |
| 48.12317131                        | 3.82895349                                  | 0.183369645                               | 8.634995962                       | 5.423742227                             |
| 54.13314974                        | 3.847319233                                 | 0.175504293                               | 8.9385524                         | 5.769093833                             |
| 41.78887298                        | 3.712815455                                 | 0.202212749                               | 8.508896047                       | 4.957835947                             |
| 24.72142316                        | 3.392348177                                 | 0.25375387                                | 7.991971438                       | 3.759522924                             |
| 14.81757474                        | 3.029050839                                 | 0.297277131                               | 7.457123504                       | 2.983346195                             |
| 31.75252354                        | 3.564141363                                 | 0.23710763                                | 8.365111297                       | 4.284135444                             |
| 32.76473987                        | 3.576285772                                 | 0.243590788                               | 8.545409237                       | 4.20092884                              |
| 14.94770013                        | 3.042638492                                 | 0.316061559                               | 7.3777173                         | 2.783037304                             |
| 16.24691796                        | 3.022949682                                 | 0.335022949                               | 7.187203009                       | 2.724978609                             |
| 30.69967024                        | 3.457015298                                 | 0.221042225                               | 7.440041911                       | 4.350880584                             |
| 36.83364201                        | 3.636804197                                 | 0.234481291                               | 8.392255277                       | 4.531577957                             |
| 41.26691275                        | 3.669570028                                 | 0.201820018                               | 7.910339878                       | 4.989896964                             |
| 34.22467618                        | 3.605512674                                 | 0.234555736                               | 8.555113598                       | 4.18472317                              |
| 28.85627344                        | 3.464585934                                 | 0.233633806                               | 7.765930619                       | 4.211262657                             |
| 34.54522038                        | 3.616217266                                 | 0.230945128                               | 8.442921856                       | 4.460023899                             |
| 32.23369952                        | 3.530811286                                 | 0.24116342                                | 8.369424393                       | 4.244193045                             |
| 31.60627896                        | 3.550176182                                 | 0.225962468                               | 8.29768139                        | 4.330699132                             |
| 20.61170441                        | 3.251910491                                 | 0.29503988                                | 7.841300702                       | 3.234694941                             |
| 18.20226944                        | 3.169642735                                 | 0.308554029                               | 7.662505548                       | 3.051310967                             |
| 20.45915911                        | 3.243184365                                 | 0.305549763                               | 7.731644564                       | 3.179257021                             |
| 47.59360847                        | 3.781619534                                 | 0.185295879                               | 8.657354989                       | 5.40447316                              |
| 32.00613536                        | 3.539049753                                 | 0.225585445                               | 8.239878991                       | 4.371770993                             |
| 33.95924824                        | 3.585240003                                 | 0.221245303                               | 7.95785106                        | 4.483055966                             |
| 36.72923081                        | 3.616573751                                 | 0.212244717                               | 8.454180278                       | 4.697770203                             |
| 27.31452476                        | 3.466590467                                 | 0.249142025                               | 8.249448382                       | 3.982374056                             |
| 54.00314655                        | 3.839759256                                 | 0.17371849                                | 8.344206459                       | 5.866137684                             |
| 51.97956523                        | 3.889233083                                 | 0.172485544                               | 8.869882747                       | 5.694708277                             |
| 36.53937755                        | 3.646579664                                 | 0.22847773                                | 8.556273075                       | 4.53699712                              |
| 44.92118637                        | 3.609381628                                 | 0.207951662                               | 6.958505336                       | 5.194464401                             |
| 21.89927597                        | 3.303481824                                 | 0.268194216                               | 8.010630403                       | 3.527904463                             |
| 18.64324618                        | 3.19815942                                  | 0.300487383                               | 7.692263071                       | 3.104401328                             |
| 31.27174006                        | 3.54140672                                  | 0.219601978                               | 8.156105559                       | 4.34674763                              |
| 48.27122026                        | 3.813384673                                 | 0.186178006                               | 8.799652842                       | 5.499119316                             |
| 19.18036366                        | 3.045809359                                 | 0.271711136                               | 6.793641102                       | 3.389088481                             |
| 38.93331601                        | 3.486379339                                 | 0.188272619                               | 6.505658291                       | 4.966202358                             |
| 28.88986363                        | 3.474404296                                 | 0.262702639                               | 8.255925903                       | 3.888428003                             |
| 46.45358939                        | 3.801819752                                 | 0.191876322                               | 8.265176244                       | 5.245788698                             |
| 22.20108271                        | 3.311425007                                 | 0.271066325                               | 7.689358038                       | 3.404575371                             |
| 20.9984105                         | 3.27637599                                  | 0.285357208                               | 7.912902866                       | 3.35373086                              |
| 17.07635403                        | 3.146644365                                 | 0.306806634                               | 7.742594968                       | 3.033027822                             |
| 79.38193553                        | 4.022435323                                 | 0.14921833                                | 7.881901773                       | 7.031923165                             |
| 26.19539731                        | 3.423163697                                 | 0.248677372                               | 8.147553775                       | 3.898800507                             |
| 50.35669051                        | 3.688640777                                 | 0.1549917                                 | 6.816918184                       | 5.681287774                             |
| 18.64566217                        | 3.182699937                                 | 0.256105505                               | 7.538642234                       | 3.410470996                             |
| 40.01976121                        | 3.669490604                                 | 0.235340252                               | 8.078000559                       | 4.594520472                             |



| log.sigma.3.0.mm.3D_glc_m_DifferenceVariance | log.sigma.3.0.mm.3D_glc_m_Idn | log.sigma.3.0.mm.3D_glc_m_Idm | log.sigma.3.0.mm.3D_glc_m_Correlation | log.sigma.3.0.mm.3D_glc_m_Autocorrelation |
|----------------------------------------------|-------------------------------|-------------------------------|---------------------------------------|-------------------------------------------|
| 12.13489309                                  | 0.886118767                   | 0.215742272                   | 0.480226871                           | 246.1857975                               |
| 11.89445301                                  | 0.912108655                   | 0.322031444                   | 0.443479961                           | 227.1134999                               |
| 10.72186345                                  | 0.876927829                   | 0.22742676                    | 0.43755195                            | 121.5600019                               |
| 15.01689883                                  | 0.885705766                   | 0.212246214                   | 0.418542099                           | 277.1934201                               |
| 12.77161501                                  | 0.879230283                   | 0.201850535                   | 0.558251321                           | 268.2287552                               |
| 7.761192862                                  | 0.877897865                   | 0.249061926                   | 0.445519629                           | 128.2063887                               |
| 5.510795236                                  | 0.891006204                   | 0.297937488                   | 0.458491749                           | 120.5064613                               |
| 16.78567369                                  | 0.875902293                   | 0.175271459                   | 0.435642659                           | 275.6993252                               |
| 14.92903213                                  | 0.887579583                   | 0.206880429                   | 0.476573894                           | 276.0681734                               |
| 9.638801961                                  | 0.909574497                   | 0.284722616                   | 0.468725044                           | 188.7669878                               |
| 9.138833938                                  | 0.875156353                   | 0.230196823                   | 0.421742125                           | 283.0961696                               |
| 10.4230115                                   | 0.894204126                   | 0.251769362                   | 0.516044449                           | 172.8836466                               |
| 7.848396567                                  | 0.899070476                   | 0.270030414                   | 0.549462262                           | 145.1005677                               |
| 8.755170629                                  | 0.884123463                   | 0.235184636                   | 0.52884581                            | 163.0011562                               |
| 9.682335512                                  | 0.875855576                   | 0.224997134                   | 0.451745841                           | 181.574413                                |
| 8.121310509                                  | 0.945339912                   | 0.463411587                   | 0.489419179                           | 192.7818054                               |
| 11.67726917                                  | 0.872742683                   | 0.204432454                   | 0.479359955                           | 199.3555758                               |
| 10.95366906                                  | 0.889058622                   | 0.262597637                   | 0.535879965                           | 130.8350589                               |
| 14.81693154                                  | 0.865748103                   | 0.188417593                   | 0.51186394                            | 225.337948                                |
| 6.964465753                                  | 0.906315874                   | 0.361217904                   | 0.50309032                            | 104.3424446                               |
| 7.527055641                                  | 0.921691479                   | 0.332415256                   | 0.431722761                           | 206.9540746                               |
| 10.60281826                                  | 0.898875853                   | 0.223940797                   | 0.498474111                           | 168.0734138                               |
| 8.948512124                                  | 0.89650244                    | 0.273572117                   | 0.504382372                           | 164.2156298                               |
| 12.68367982                                  | 0.884958387                   | 0.208460912                   | 0.460912175                           | 398.8755581                               |
| 8.842059886                                  | 0.904395496                   | 0.289578891                   | 0.366826594                           | 135.6745762                               |
| 15.88044103                                  | 0.882884975                   | 0.226524084                   | 0.394427018                           | 192.7291452                               |
| 7.76401967                                   | 0.931082092                   | 0.374853168                   | 0.453111967                           | 300.7656335                               |
| 10.08592406                                  | 0.89675166                    | 0.262902004                   | 0.460699729                           | 165.1229442                               |
| 13.72019577                                  | 0.877953231                   | 0.211729856                   | 0.487112623                           | 262.3273249                               |
| 11.36274413                                  | 0.925957298                   | 0.338704043                   | 0.452726776                           | 197.3818413                               |
| 8.512400803                                  | 0.906712987                   | 0.290612674                   | 0.448123905                           | 201.0292786                               |
| 8.464553718                                  | 0.909689316                   | 0.311612068                   | 0.54227447                            | 173.7759958                               |
| 12.90232088                                  | 0.891472512                   | 0.225256988                   | 0.47733894                            | 223.5824798                               |
| 20.09084409                                  | 0.853348175                   | 0.154119439                   | 0.360878659                           | 325.4918715                               |
| 15.84607952                                  | 0.852989245                   | 0.171295369                   | 0.441709278                           | 245.9155226                               |
| 10.51658681                                  | 0.890092081                   | 0.237625562                   | 0.511898714                           | 231.3427717                               |
| 13.67722649                                  | 0.90172916                    | 0.255695253                   | 0.459074518                           | 172.4737509                               |
| 7.694496249                                  | 0.895454746                   | 0.282469766                   | 0.494303472                           | 162.4733297                               |
| 9.729691602                                  | 0.890136669                   | 0.230421454                   | 0.449470106                           | 255.0615875                               |
| 11.71523777                                  | 0.883842844                   | 0.236315762                   | 0.463691688                           | 184.207924                                |
| 9.581888601                                  | 0.904330282                   | 0.295128314                   | 0.489766033                           | 171.3546793                               |
| 12.87238994                                  | 0.88585312                    | 0.205363645                   | 0.497240777                           | 244.3570705                               |
| 11.50093956                                  | 0.879714448                   | 0.215037157                   | 0.46432132                            | 211.4707136                               |
| 14.79126105                                  | 0.883353294                   | 0.19780072                    | 0.47358213                            | 257.1892213                               |
| 10.42005378                                  | 0.887830003                   | 0.214118681                   | 0.420350708                           | 295.5552882                               |
| 6.142955338                                  | 0.89677216                    | 0.333714993                   | 0.431016825                           | 98.00683185                               |
| 11.68810162                                  | 0.891945246                   | 0.226219404                   | 0.437529144                           | 259.0212861                               |
| 10.80351684                                  | 0.868603092                   | 0.21792988                    | 0.448094165                           | 114.1188116                               |
| 22.14721653                                  | 0.859275114                   | 0.181070211                   | 0.303651685                           | 405.3384904                               |
| 15.69975666                                  | 0.888563749                   | 0.199279004                   | 0.487920372                           | 304.41215                                 |
| 8.968381204                                  | 0.909942944                   | 0.288862544                   | 0.496404626                           | 177.2731101                               |
| 11.90883826                                  | 0.855267064                   | 0.236157603                   | 0.462934742                           | 149.5254973                               |
| 12.52339634                                  | 0.903815062                   | 0.263231306                   | 0.435459051                           | 262.3588857                               |
| 7.598936835                                  | 0.883112117                   | 0.256570182                   | 0.496982948                           | 153.6380611                               |
| 10.12954488                                  | 0.910685177                   | 0.396573645                   | 0.504747454                           | 136.1487592                               |
| 17.75993578                                  | 0.868960123                   | 0.179224883                   | 0.417808878                           | 215.3805204                               |
| 17.8221959                                   | 0.874287484                   | 0.168987735                   | 0.383792031                           | 330.470682                                |
| 15.77405192                                  | 0.884591398                   | 0.200609896                   | 0.401777377                           | 360.8391428                               |
| 10.22488564                                  | 0.890117203                   | 0.259145567                   | 0.50567691                            | 200.5396502                               |
| 5.554590004                                  | 0.899671468                   | 0.287155175                   | 0.522806698                           | 185.9681095                               |
| 12.87478766                                  | 0.887260392                   | 0.232484664                   | 0.481330665                           | 158.3051165                               |
| 14.48414512                                  | 0.909387135                   | 0.255578906                   | 0.47994345                            | 231.6204974                               |
| 6.822159712                                  | 0.922948872                   | 0.353025253                   | 0.475819915                           | 197.5253261                               |
| 8.454499813                                  | 0.921267718                   | 0.391333761                   | 0.434171102                           | 255.8480037                               |
| 11.2600663                                   | 0.857923978                   | 0.202963826                   | 0.455133387                           | 181.4571474                               |
| 15.45353981                                  | 0.898567475                   | 0.230690794                   | 0.411898956                           | 255.4445179                               |
| 15.09403739                                  | 0.877757159                   | 0.192935822                   | 0.384240822                           | 276.4714646                               |
| 14.05675354                                  | 0.890472052                   | 0.236360627                   | 0.487313765                           | 242.6530472                               |
| 10.55302633                                  | 0.866245785                   | 0.220038724                   | 0.481920656                           | 138.1898726                               |
| 13.9923691                                   | 0.889425715                   | 0.230445965                   | 0.436343042                           | 211.6936267                               |
| 12.85188128                                  | 0.891629834                   | 0.245057074                   | 0.464060179                           | 233.0999794                               |
| 12.20918493                                  | 0.885792568                   | 0.225265648                   | 0.493334291                           | 174.1668284                               |
| 9.714547634                                  | 0.907554401                   | 0.325064221                   | 0.479603584                           | 148.1982052                               |
| 8.587707103                                  | 0.916750678                   | 0.334131355                   | 0.459435754                           | 247.772665                                |
| 10.05979044                                  | 0.929505822                   | 0.33033276                    | 0.439382014                           | 334.1277997                               |
| 16.41340299                                  | 0.872358147                   | 0.177567363                   | 0.413669563                           | 262.9548936                               |
| 11.97250614                                  | 0.887762856                   | 0.21875947                    | 0.422306825                           | 220.6047332                               |
| 13.17148684                                  | 0.868598693                   | 0.218085789                   | 0.468175084                           | 110.9422809                               |
| 13.37624444                                  | 0.877700413                   | 0.207793356                   | 0.417751894                           | 267.9071335                               |
| 10.97894497                                  | 0.893866147                   | 0.248268166                   | 0.463060687                           | 189.4208553                               |
| 17.83228709                                  | 0.868996609                   | 0.160936735                   | 0.393073444                           | 276.9775499                               |
| 18.54800711                                  | 0.872496149                   | 0.165718139                   | 0.404149858                           | 323.2391523                               |
| 15.08991144                                  | 0.893573445                   | 0.236590696                   | 0.419742205                           | 281.5376644                               |
| 16.68690871                                  | 0.860046204                   | 0.188316264                   | 0.383002867                           | 333.5872325                               |
| 8.844509748                                  | 0.8926292                     | 0.271064232                   | 0.480012981                           | 162.4350923                               |
| 8.679565295                                  | 0.925559394                   | 0.322257209                   | 0.447869818                           | 248.7363034                               |
| 11.86267834                                  | 0.875094741                   | 0.216899074                   | 0.513974563                           | 149.8054544                               |
| 16.65538946                                  | 0.870147545                   | 0.174179265                   | 0.448280278                           | 356.2960864                               |
| 6.307277577                                  | 0.866258556                   | 0.267179997                   | 0.381298746                           | 151.1343424                               |
| 12.41844832                                  | 0.846625417                   | 0.179626395                   | 0.35091202                            | 212.5396058                               |
| 13.05183238                                  | 0.9136849                     | 0.286462814                   | 0.447496079                           | 335.361488                                |
| 18.10542729                                  | 0.876066273                   | 0.18713627                    | 0.390642366                           | 195.8680116                               |
| 10.27345047                                  | 0.900262799                   | 0.312283214                   | 0.439837469                           | 219.44397                                 |
| 9.413869273                                  | 0.907180151                   | 0.303172098                   | 0.461162656                           | 170.141085                                |
| 7.621495044                                  | 0.906140694                   | 0.31479736                    | 0.49486385                            | 128.0071159                               |
| 25.53092939                                  | 0.84933442                    | 0.148732959                   | 0.442772979                           | 308.9350195                               |
| 10.57954661                                  | 0.889647844                   | 0.239870424                   | 0.470988421                           | 272.9032672                               |
| 16.08420687                                  | 0.83929013                    | 0.165015846                   | 0.388111761                           | 220.6517265                               |
| 6.653965895                                  | 0.879046252                   | 0.250909751                   | 0.567643751                           | 148.4033547                               |
| 18.19888347                                  | 0.904618562                   | 0.235098213                   | 0.369623429                           | 288.7028069                               |

| log.sigma.3.0.mm.3D_glcmm_SumEntropy | log.sigma.3.0.mm.3D_glcmm_AverageIntensity | log.sigma.3.0.mm.3D_glcmm_Energy | log.sigma.3.0.mm.3D_glcmm_SumSquares | log.sigma.3.0.mm.3D_glcmm_ClusterProminence |
|--------------------------------------|--------------------------------------------|----------------------------------|--------------------------------------|---------------------------------------------|
| 5.197303607                          | 15.35867018                                | 0.004265719                      | 32.57487358                          | 24458.16536                                 |
| 4.94613721                           | 14.91575231                                | 0.008178989                      | 22.92742877                          | 13199.602                                   |
| 4.951497575                          | 10.52663398                                | 0.006214771                      | 25.37408226                          | 15391.63262                                 |
| 5.277812589                          | 16.46475561                                | 0.003131479                      | 33.50429364                          | 23825.4884                                  |
| 5.328036352                          | 15.78946846                                | 0.004806866                      | 40.34233063                          | 41026.55134                                 |
| 4.832999711                          | 10.94218299                                | 0.005971661                      | 19.05597232                          | 7273.400207                                 |
| 4.5309104                            | 10.69756361                                | 0.010786841                      | 13.33448295                          | 4948.969941                                 |
| 5.413811314                          | 16.34217166                                | 0.002955098                      | 42.50905861                          | 37398.63449                                 |
| 5.37798188                           | 16.3157686                                 | 0.002967475                      | 37.32805243                          | 33208.35037                                 |
| 4.937209611                          | 13.48512154                                | 0.006310361                      | 21.26404326                          | 11810.22095                                 |
| 4.925972777                          | 16.56795814                                | 0.005394217                      | 22.66012584                          | 9467.967891                                 |
| 5.13415205                           | 12.68207089                                | 0.004666492                      | 27.68463011                          | 19397.08826                                 |
| 5.00961003                           | 11.54246226                                | 0.005347539                      | 22.35791787                          | 14998.60162                                 |
| 5.076104673                          | 12.24039316                                | 0.00459566                       | 25.23501247                          | 13440.6958                                  |
| 5.034263606                          | 13.09311122                                | 0.004644995                      | 24.07588308                          | 12947.51513                                 |
| 4.462896071                          | 13.72272506                                | 0.031251079                      | 13.54955406                          | 8059.028919                                 |
| 5.219836954                          | 13.61549057                                | 0.004038745                      | 33.42812127                          | 21318.57552                                 |
| 5.16676479                           | 10.77855342                                | 0.004499677                      | 28.85507332                          | 22862.87767                                 |
| 5.389926787                          | 14.41680847                                | 0.003587916                      | 44.54438222                          | 37008.86387                                 |
| 4.716209261                          | 9.844734096                                | 0.009296038                      | 14.72636841                          | 6218.384368                                 |
| 4.678340307                          | 14.23794684                                | 0.009241293                      | 14.83438831                          | 5763.960871                                 |
| 5.157775933                          | 12.4976027                                 | 0.004098762                      | 28.50953448                          | 21505.60868                                 |
| 4.993527062                          | 12.40664178                                | 0.005781022                      | 22.19915898                          | 13687.0392                                  |
| 5.118213655                          | 19.86990915                                | 0.004975318                      | 30.56223507                          | 25814.75544                                 |
| 4.674139096                          | 11.41280676                                | 0.008186571                      | 16.17033233                          | 6242.103668                                 |
| 5.153009532                          | 13.61478758                                | 0.004496704                      | 33.05673581                          | 22364.1263                                  |
| 4.601326333                          | 17.27915098                                | 0.014775856                      | 14.31051576                          | 7441.223296                                 |
| 4.91956633                           | 12.50305567                                | 0.006304946                      | 22.60469194                          | 12540.80127                                 |
| 5.261534258                          | 15.84981628                                | 0.003808198                      | 36.72408421                          | 23078.23411                                 |
| 4.912915084                          | 13.88163416                                | 0.009056166                      | 21.299412                            | 13000.99409                                 |
| 4.814360919                          | 13.94994179                                | 0.007011139                      | 18.63335123                          | 9181.467797                                 |
| 5.003250368                          | 12.79009578                                | 0.006525981                      | 21.75446572                          | 12979.69057                                 |
| 5.241292479                          | 14.6379875                                 | 0.003501263                      | 31.95131728                          | 20816.32193                                 |
| 4.877485865                          | 17.78015325                                | 0.010259395                      | 44.91591846                          | 38614.40074                                 |
| 5.247923721                          | 15.23660942                                | 0.004836245                      | 41.25271654                          | 32260.34412                                 |
| 5.170378277                          | 14.84596026                                | 0.003890056                      | 28.53882656                          | 15986.79797                                 |
| 5.143800648                          | 12.81963214                                | 0.004592915                      | 30.34042205                          | 19792.62585                                 |
| 4.904021799                          | 12.38221056                                | 0.005531323                      | 18.55004121                          | 8128.861393                                 |
| 5.053107893                          | 15.7054694                                 | 0.005316362                      | 26.09213271                          | 17672.3186                                  |
| 5.120770837                          | 13.13562448                                | 0.004324865                      | 27.80542183                          | 16412.50842                                 |
| 4.961201245                          | 12.73652151                                | 0.006399038                      | 21.12826902                          | 11542.97545                                 |
| 5.291620607                          | 15.23052224                                | 0.003696548                      | 35.0484633                           | 27308.80483                                 |
| 5.17098052                           | 14.1303801                                 | 0.003793234                      | 30.84067064                          | 17141.61236                                 |
| 5.34679328                           | 15.66295997                                | 0.00328771                       | 38.03858396                          | 31721.15417                                 |
| 5.061178979                          | 17.07786781                                | 0.004134469                      | 25.34863951                          | 13200.76472                                 |
| 4.513580908                          | 7.254581143                                | 0.010212517                      | 12.4307301                           | 3895.483319                                 |
| 5.138277861                          | 15.88718916                                | 0.003677724                      | 27.11500235                          | 15162.04595                                 |
| 5.051015846                          | 10.10054136                                | 0.00465037                       | 27.0953815                           | 14256.47361                                 |
| 4.87349437                           | 20.18603491                                | 0.010771044                      | 40.17407846                          | 40779.54451                                 |
| 5.295025847                          | 17.15649506                                | 0.005371317                      | 40.13051663                          | 47063.05632                                 |
| 4.976699051                          | 12.9761792                                 | 0.005805558                      | 21.34071541                          | 11953.07823                                 |
| 5.036233299                          | 11.65265255                                | 0.005490218                      | 29.58373713                          | 13641.91385                                 |
| 5.111144078                          | 16.08164074                                | 0.004516468                      | 26.72081413                          | 17716.44799                                 |
| 4.888042838                          | 11.9987392                                 | 0.006255747                      | 19.51959419                          | 9116.289182                                 |
| 4.821262751                          | 11.27038963                                | 0.013950498                      | 19.08761536                          | 10877.3853                                  |
| 5.381426258                          | 14.34234713                                | 0.003067082                      | 42.41091779                          | 32889.60221                                 |
| 5.426473812                          | 18.11354724                                | 0.0025057                        | 43.15245425                          | 36198.19619                                 |
| 5.24247563                           | 18.95259328                                | 0.003801942                      | 33.75449999                          | 27908.26349                                 |
| 5.071531985                          | 13.74743598                                | 0.005306334                      | 25.60545065                          | 15378.79172                                 |
| 4.751958736                          | 13.33649132                                | 0.007010218                      | 15.49880857                          | 5322.738085                                 |
| 5.186207102                          | 12.05871358                                | 0.004249677                      | 31.44659764                          | 22449.30485                                 |
| 5.257604376                          | 14.95945483                                | 0.003785659                      | 31.95240617                          | 31054.49183                                 |
| 4.664950518                          | 13.85702127                                | 0.010340104                      | 14.59079277                          | 6521.03136                                  |
| 4.613421971                          | 15.86037376                                | 0.014893275                      | 14.79622837                          | 6138.983928                                 |
| 4.958884784                          | 12.98888832                                | 0.00669113                       | 28.04670504                          | 16684.67006                                 |
| 5.175373726                          | 15.89773816                                | 0.004402546                      | 31.58440461                          | 27739.34713                                 |
| 5.099671937                          | 16.47157272                                | 0.005414793                      | 33.72992451                          | 23458.01667                                 |
| 5.288715848                          | 15.25749024                                | 0.003446384                      | 34.27377404                          | 25239.20544                                 |
| 5.028927736                          | 11.1714593                                 | 0.005670056                      | 27.77986749                          | 14239.13783                                 |
| 5.202434402                          | 14.29253906                                | 0.003815558                      | 31.7617395                           | 20523.33624                                 |
| 5.18176618                           | 14.99679467                                | 0.004181331                      | 30.91340901                          | 18839.32019                                 |
| 5.21141259                           | 12.66993667                                | 0.003964006                      | 31.87986498                          | 20777.54389                                 |
| 4.9021372                            | 11.81187365                                | 0.007044433                      | 20.14858859                          | 11368.71238                                 |
| 4.799657057                          | 15.61671796                                | 0.007946616                      | 17.57620564                          | 7214.797374                                 |
| 4.775488638                          | 18.28880761                                | 0.009915724                      | 17.77715678                          | 12786.49721                                 |
| 5.357676809                          | 15.98936205                                | 0.00306835                       | 41.27344968                          | 31256.26748                                 |
| 5.111920127                          | 14.5970707                                 | 0.004150313                      | 28.5515768                           | 16074.86419                                 |
| 5.09760629                           | 9.824422234                                | 0.00515972                       | 32.57964952                          | 24775.31124                                 |
| 5.21462591                           | 16.22026288                                | 0.003656448                      | 32.60133642                          | 19822.98104                                 |
| 5.079659592                          | 13.4236825                                 | 0.004362556                      | 26.30048002                          | 13411.91719                                 |
| 5.357449092                          | 16.40636267                                | 0.003661941                      | 45.68146035                          | 36535.7477                                  |
| 5.438387054                          | 17.8095738                                 | 0.002593952                      | 43.24635079                          | 36725.25091                                 |
| 5.233082032                          | 16.67217679                                | 0.003747656                      | 31.54828926                          | 22099.80571                                 |
| 4.875906834                          | 18.0535688                                 | 0.009345344                      | 36.4515423                           | 29968.74063                                 |
| 4.973182946                          | 12.34757988                                | 0.005091649                      | 21.25922121                          | 10679.08201                                 |
| 4.782544239                          | 15.68137364                                | 0.008299125                      | 17.40094148                          | 9309.374927                                 |
| 5.186524907                          | 11.58694306                                | 0.00442382                       | 32.78430404                          | 23967.84246                                 |
| 5.437548019                          | 18.66204256                                | 0.002808065                      | 43.22676339                          | 37024.46575                                 |
| 4.527438296                          | 12.04444445                                | 0.010760942                      | 15.59566265                          | 4589.179809                                 |
| 4.618171686                          | 14.22938084                                | 0.012053262                      | 29.35938086                          | 16241.77406                                 |
| 5.084124422                          | 18.20825726                                | 0.006069369                      | 25.93032189                          | 20692.67177                                 |
| 5.216191995                          | 13.70062257                                | 0.004154554                      | 40.14659001                          | 29994.93933                                 |
| 4.861476314                          | 14.55142651                                | 0.010223671                      | 20.19882413                          | 9704.408979                                 |
| 4.914831889                          | 12.73767017                                | 0.006713695                      | 19.9589441                           | 10667.93872                                 |
| 4.827989623                          | 10.94029402                                | 0.00669486                       | 16.98926772                          | 7502.366543                                 |
| 5.502145147                          | 17.11415541                                | 0.004907743                      | 71.42783642                          | 89926.91071                                 |
| 5.078023281                          | 16.24053114                                | 0.004769003                      | 25.17411856                          | 15297.2081                                  |
| 4.891539095                          | 14.39542485                                | 0.009812498                      | 41.05110879                          | 30617.69316                                 |
| 4.945901108                          | 11.66915914                                | 0.006958708                      | 21.51990838                          | 11675.06726                                 |
| 5.124775354                          | 17.00824603                                | 0.005280347                      | 32.96046699                          | 29084.99222                                 |

| log.sigma.3.0.mm.3D_glc_m_SumAverage | log.sigma.3.0.mm.3D_glc_m_Irc2 | log.sigma.3.0.mm.3D_glc_m_Irc1 | log.sigma.3.0.mm.3D_glc_m_DifferenceAverage | log.sigma.3.0.mm.3D_glc_m_Id |
|--------------------------------------|--------------------------------|--------------------------------|---------------------------------------------|------------------------------|
| 30.40706388                          | 0.880194383                    | -0.168855737                   | 4.443721867                                 | 0.305984702                  |
| 29.49352701                          | 0.800653566                    | -0.12730649                    | 3.485939935                                 | 0.395909433                  |
| 21.02715548                          | 0.893259672                    | -0.190838009                   | 4.121879966                                 | 0.317850265                  |
| 32.47020376                          | 0.71432048                     | -0.084183959                   | 4.763678436                                 | 0.300692196                  |
| 31.37695418                          | 0.95839135                     | -0.271883184                   | 4.611927948                                 | 0.294681188                  |
| 21.88436598                          | 0.794738425                    | -0.125597                      | 3.61210797                                  | 0.339274458                  |
| 21.39512722                          | 0.879193445                    | -0.19862252                    | 2.913287356                                 | 0.382834215                  |
| 32.09617966                          | 0.838972722                    | -0.13323466                    | 5.500592005                                 | 0.265863377                  |
| 32.16707583                          | 0.76614887                     | -0.100119684                   | 4.793609506                                 | 0.29653578                   |
| 26.77970945                          | 0.707141813                    | -0.089857971                   | 3.435344082                                 | 0.367830776                  |
| 33.08671579                          | 0.77609656                     | -0.11507983                    | 4.018131647                                 | 0.320589314                  |
| 25.22473192                          | 0.790238018                    | -0.120271114                   | 3.84876967                                  | 0.338841277                  |
| 23.05569004                          | 0.758115068                    | -0.112059366                   | 3.384505453                                 | 0.357402407                  |
| 24.47164031                          | 0.788648174                    | -0.120431143                   | 3.814839517                                 | 0.326503137                  |
| 26.14566919                          | 0.788058625                    | -0.117066067                   | 3.996286198                                 | 0.317199124                  |
| 27.30619284                          | 0.813702506                    | -0.154722631                   | 2.271793911                                 | 0.517476582                  |
| 27.10442191                          | 0.864679225                    | -0.159501968                   | 4.588904974                                 | 0.295940166                  |
| 21.50320047                          | 0.758797155                    | -0.108350117                   | 3.823288003                                 | 0.3470277                    |
| 28.52120821                          | 0.906580025                    | -0.190439347                   | 5.078534751                                 | 0.279770378                  |
| 19.68946819                          | 0.742107576                    | -0.111503552                   | 2.721448473                                 | 0.432967869                  |
| 28.34150123                          | 0.649087348                    | -0.077178419                   | 2.920236891                                 | 0.409368108                  |
| 24.84468113                          | 0.758338784                    | -0.103954525                   | 4.094750393                                 | 0.315966343                  |
| 24.75919033                          | 0.716011051                    | -0.093735032                   | 3.50232062                                  | 0.359115585                  |
| 39.24064111                          | 0.905402758                    | -0.195016755                   | 4.494788478                                 | 0.300190274                  |
| 22.79002273                          | 0.720156454                    | -0.097559491                   | 3.319927393                                 | 0.372751653                  |
| 26.86651396                          | 0.867887282                    | -0.159398833                   | 4.656861829                                 | 0.312643608                  |
| 34.32037885                          | 0.731530373                    | -0.105764494                   | 2.712032371                                 | 0.444220799                  |
| 24.90272815                          | 0.748543619                    | -0.105262651                   | 3.629174736                                 | 0.354424006                  |
| 31.30604858                          | 0.761740802                    | -0.106956839                   | 4.691580615                                 | 0.30021616                   |
| 27.43708207                          | 0.804533803                    | -0.129556116                   | 3.294156786                                 | 0.410932786                  |
| 27.78228816                          | 0.679503362                    | -0.083152137                   | 3.32862454                                  | 0.373264253                  |
| 25.47952943                          | 0.731771338                    | -0.103800282                   | 3.223350054                                 | 0.391147072                  |
| 28.91208868                          | 0.748305391                    | -0.097131403                   | 4.349148657                                 | 0.314004506                  |
| 35.1945231                           | 0.993986445                    | -0.49976487                    | 6.017531631                                 | 0.246194256                  |
| 30.22443796                          | 0.953350369                    | -0.261781665                   | 5.293346461                                 | 0.264600967                  |
| 29.47655637                          | 0.742127732                    | -0.098667357                   | 4.004251968                                 | 0.326450328                  |
| 25.24454523                          | 0.727614837                    | -0.09388917                    | 4.144916238                                 | 0.339177636                  |
| 24.76313722                          | 0.680792358                    | -0.082615116                   | 3.283863329                                 | 0.367527939                  |
| 31.22345499                          | 0.830292023                    | -0.150622875                   | 4.124597418                                 | 0.320206938                  |
| 26.19607435                          | 0.799509474                    | -0.120899128                   | 4.147619288                                 | 0.32485996                   |
| 25.39612233                          | 0.78259768                     | -0.119259589                   | 3.34063847                                  | 0.377057152                  |
| 30.16057671                          | 0.841736814                    | -0.140224174                   | 4.585159015                                 | 0.296711771                  |
| 28.10831113                          | 0.753779435                    | -0.102087478                   | 4.443768801                                 | 0.305290711                  |
| 30.96336458                          | 0.840801429                    | -0.13762501                    | 4.862853863                                 | 0.288664178                  |
| 33.78666823                          | 0.712820351                    | -0.08682296                    | 4.204455895                                 | 0.30699914                   |
| 14.50916229                          | 0.657304348                    | -0.083976371                   | 2.766948404                                 | 0.410686593                  |
| 31.4716736                           | 0.644970189                    | -0.067752603                   | 4.184004852                                 | 0.316568125                  |
| 20.19422843                          | 0.835613358                    | -0.142634941                   | 4.28329598                                  | 0.309191717                  |
| 39.63968395                          | 0.987147948                    | -0.420561866                   | 5.968870067                                 | 0.265963172                  |
| 33.75587834                          | 0.935437637                    | -0.229364368                   | 5.009116292                                 | 0.287557538                  |
| 25.84474292                          | 0.711889049                    | -0.092275697                   | 3.408162934                                 | 0.37160037                   |
| 23.3053051                           | 0.784659614                    | -0.1220958                     | 4.328099568                                 | 0.322044853                  |
| 31.69683339                          | 0.707252969                    | -0.088453163                   | 4.035236721                                 | 0.345614477                  |
| 23.9974784                           | 0.832116362                    | -0.14529767                    | 3.439700088                                 | 0.347075393                  |
| 22.51121695                          | 0.816411139                    | -0.14543657                    | 2.863015071                                 | 0.459429492                  |
| 28.18167031                          | 0.849195088                    | -0.139236198                   | 5.423742227                                 | 0.270081475                  |
| 35.45546039                          | 0.763779027                    | -0.10111499                    | 5.769093833                                 | 0.259091885                  |
| 37.27784314                          | 0.797357599                    | -0.1167555                     | 4.957835947                                 | 0.290632991                  |
| 27.41179334                          | 0.842897389                    | -0.1468776                     | 3.759522924                                 | 0.345742868                  |
| 26.67298265                          | 0.771981861                    | -0.12338684                    | 2.983346195                                 | 0.373696048                  |
| 23.96986647                          | 0.738336779                    | -0.094926197                   | 4.284135444                                 | 0.319904842                  |
| 29.45059487                          | 0.723958635                    | -0.090585559                   | 4.20092884                                  | 0.339238395                  |
| 27.62757182                          | 0.739086538                    | -0.111305577                   | 2.783037304                                 | 0.426253021                  |
| 31.59883691                          | 0.79066388                     | -0.134707843                   | 2.724978609                                 | 0.455711561                  |
| 25.97777665                          | 0.958310241                    | -0.289352533                   | 4.350880584                                 | 0.296930398                  |
| 31.17144232                          | 0.805927495                    | -0.121434199                   | 4.531577957                                 | 0.316698053                  |
| 32.4831056                           | 0.921055616                    | -0.214825828                   | 4.989896964                                 | 0.283768274                  |
| 30.09940909                          | 0.731365356                    | -0.091961243                   | 4.18472317                                  | 0.321870619                  |
| 22.3429186                           | 0.871218566                    | -0.171125318                   | 4.211262657                                 | 0.310396259                  |
| 28.18484252                          | 0.744825851                    | -0.095411711                   | 4.460023899                                 | 0.316912882                  |
| 29.62955323                          | 0.724405354                    | -0.095022194                   | 4.244193045                                 | 0.330411952                  |
| 25.20709881                          | 0.806616804                    | -0.123458749                   | 4.330699132                                 | 0.31431254                   |
| 23.56284072                          | 0.71094525                     | -0.095852536                   | 3.234694941                                 | 0.400813992                  |
| 30.99060268                          | 0.699204235                    | -0.091428761                   | 3.051310967                                 | 0.408926142                  |
| 36.12711107                          | 0.678196327                    | -0.08307212                    | 3.179257021                                 | 0.404925382                  |
| 31.39710388                          | 0.832251761                    | -0.132053479                   | 5.40447316                                  | 0.268693987                  |
| 28.92060139                          | 0.792929214                    | -0.117462838                   | 4.371770993                                 | 0.30885865                   |
| 19.5857542                           | 0.860654871                    | -0.159424468                   | 4.483055966                                 | 0.307509907                  |
| 31.93863407                          | 0.739316458                    | -0.100495623                   | 4.697770203                                 | 0.297748187                  |
| 26.66143738                          | 0.687859403                    | -0.081386472                   | 3.982374056                                 | 0.334544726                  |
| 32.22956413                          | 0.925487186                    | -0.20932074                    | 5.866137684                                 | 0.251091546                  |
| 34.98181281                          | 0.807099619                    | -0.114437068                   | 5.694708277                                 | 0.257250575                  |
| 32.78081791                          | 0.735305461                    | -0.093447579                   | 4.53699712                                  | 0.321492649                  |
| 35.78553696                          | 0.9854987                      | -0.406913576                   | 5.194464401                                 | 0.277522081                  |
| 24.67781957                          | 0.686700138                    | -0.08772134                    | 3.527904463                                 | 0.356660327                  |
| 31.06864984                          | 0.669764934                    | -0.082039635                   | 3.104401328                                 | 0.39981102                   |
| 23.09304633                          | 0.847728962                    | -0.146995618                   | 4.34674763                                  | 0.3080367                    |
| 36.72502204                          | 0.788914762                    | -0.108583015                   | 5.499119316                                 | 0.264306985                  |
| 24.0888889                           | 0.928587848                    | -0.259014225                   | 3.389088481                                 | 0.354724862                  |
| 28.45876168                          | 0.989143682                    | -0.45776777                    | 4.966202358                                 | 0.273990769                  |
| 35.98789943                          | 0.757080057                    | -0.104916691                   | 3.888428003                                 | 0.365427462                  |
| 26.92384952                          | 0.876860633                    | -0.163327694                   | 5.245788698                                 | 0.277976171                  |
| 29.03433361                          | 0.823387247                    | -0.141317844                   | 3.404575371                                 | 0.390648707                  |
| 25.39079902                          | 0.703511365                    | -0.091342128                   | 3.335373086                                 | 0.383134035                  |
| 21.87356356                          | 0.685170219                    | -0.086224958                   | 3.033027822                                 | 0.394155969                  |
| 33.32169238                          | 0.984243383                    | -0.361383443                   | 7.031923165                                 | 0.234645177                  |
| 32.33417706                          | 0.790663335                    | -0.117262146                   | 3.898800507                                 | 0.329468402                  |
| 28.66566468                          | 0.98508635                     | -0.411373143                   | 5.681287774                                 | 0.257561221                  |
| 23.33831829                          | 0.8971981                      | -0.19811565                    | 3.410470996                                 | 0.342932429                  |
| 33.30961923                          | 0.872914239                    | -0.164287607                   | 4.594520472                                 | 0.32077351                   |

| log.sigma.3.0.mm.3D_glcm_ClusterTendency | log.sigma.3.0.mm.3D_firstorder_InterquartileRange | log.sigma.3.0.mm.3D_firstorder_Skewness | log.sigma.3.0.mm.3D_firstorder_Uniformity |
|------------------------------------------|---------------------------------------------------|-----------------------------------------|-------------------------------------------|
| 92.89069443                              | 198.5257797                                       | 0.304346687                             | 0.050473882                               |
| 63.21073665                              | 134.5972824                                       | 0.417173976                             | 0.067035178                               |
| 72.17453373                              | 183.3689785                                       | 0.48190185                              | 0.059217652                               |
| 93.02047016                              | 210.4008522                                       | -0.072808695                            | 0.0480176                                 |
| 123.1832801                              | 188.8062363                                       | -0.052743114                            | 0.048145188                               |
| 55.02119276                              | 172.8328514                                       | 0.053870616                             | 0.063352433                               |
| 38.74404968                              | 105.9593887                                       | -0.088359515                            | 0.086511284                               |
| 120.4578344                              | 262.7015781                                       | 0.020311291                             | 0.043914168                               |
| 108.0762037                              | 223.9527779                                       | 0.168893254                             | 0.044622454                               |
| 59.69251232                              | 136.951107                                        | 0.601938048                             | 0.06781901                                |
| 63.58903255                              | 190.7667217                                       | -0.41133124                             | 0.064692388                               |
| 81.16127788                              | 178.5905914                                       | 0.478965542                             | 0.055262338                               |
| 68.6054366                               | 167.2675972                                       | 0.41090244                              | 0.06122689                                |
| 76.82616848                              | 212.7516861                                       | 0.021945043                             | 0.056336225                               |
| 68.83385439                              | 169.5843086                                       | 0.075176073                             | 0.057869363                               |
| 38.99224512                              | 66.32031441                                       | 0.646643601                             | 0.12854598                                |
| 96.62637485                              | 226.2622986                                       | -0.11396231                             | 0.049827177                               |
| 87.16919878                              | 199.2871971                                       | 0.52798881                              | 0.053523356                               |
| 129.7009392                              | 244.6675949                                       | -0.076495859                            | 0.044047661                               |
| 44.28098628                              | 131.1702271                                       | 0.386473723                             | 0.07537689                                |
| 40.83296221                              | 115.7173486                                       | 0.517611348                             | 0.080519085                               |
| 82.91321187                              | 179.2856979                                       | 0.400817818                             | 0.054683613                               |
| 65.44919196                              | 154.7019711                                       | 0.540893247                             | 0.065208026                               |
| 89.17795931                              | 187.157074                                        | -0.544019132                            | 0.054577046                               |
| 43.4777812                               | 133.7274365                                       | 0.639477742                             | 0.075444807                               |
| 87.45682089                              | 196.1061487                                       | 0.455235257                             | 0.052168027                               |
| 40.48604625                              | 93.7949872                                        | 0.664364282                             | 0.093565421                               |
| 63.94691025                              | 152.8065681                                       | 0.623701576                             | 0.064629029                               |
| 105.8806293                              | 270.3439178                                       | -0.200455502                            | 0.050342752                               |
| 59.30237874                              | 133.9455123                                       | 0.447132061                             | 0.068173335                               |
| 52.16730434                              | 139.0325384                                       | 0.587464104                             | 0.071290528                               |
| 65.20098059                              | 155.9246769                                       | 0.505242665                             | 0.065906344                               |
| 90.82122121                              | 222.0477753                                       | 0.07185578                              | 0.049557365                               |
| 120.1506458                              | 190.1335564                                       | -0.256127037                            | 0.05362426                                |
| 114.9358155                              | 217.808363                                        | -0.374974704                            | 0.050152417                               |
| 83.59858834                              | 217.1381702                                       | -0.045437042                            | 0.052433585                               |
| 83.99723149                              | 196.5073109                                       | 0.601823855                             | 0.055952932                               |
| 55.39719833                              | 159.9876957                                       | 0.115222574                             | 0.063193531                               |
| 73.52770902                              | 151.2654572                                       | -0.314254589                            | 0.062365807                               |
| 79.9439346                               | 200.3394852                                       | 0.03881141                              | 0.053726778                               |
| 61.47718454                              | 148.7446089                                       | 0.242478205                             | 0.063687361                               |
| 102.2580176                              | 224.8216629                                       | 0.070784878                             | 0.049047081                               |
| 88.16055098                              | 224.2753639                                       | -0.199718482                            | 0.052843966                               |
| 109.40747                                | 230.821785                                        | 0.08399913                              | 0.045490065                               |
| 69.28303412                              | 187.3596134                                       | -0.043581942                            | 0.05138119                                |
| 35.60406438                              | 133.2949047                                       | 0.582404301                             | 0.081141277                               |
| 75.28395808                              | 183.862196                                        | 0.147625442                             | 0.053608939                               |
| 78.27402916                              | 212.7615147                                       | -0.024316141                            | 0.053932313                               |
| 108.7595479                              | 114.4912786                                       | -0.849867148                            | 0.079416351                               |
| 119.6887116                              | 157.7438889                                       | -0.372832296                            | 0.057224636                               |
| 62.06489525                              | 158.9698524                                       | 0.411010475                             | 0.063217687                               |
| 86.5820569                               | 262.3748093                                       | -0.166349529                            | 0.060475576                               |
| 74.24493903                              | 186.2031097                                       | 0.350716123                             | 0.05483923                                |
| 58.33772224                              | 153.9317513                                       | -0.132110273                            | 0.064941981                               |
| 56.59408577                              | 109.1145039                                       | 0.464739279                             | 0.086129814                               |
| 115.3765445                              | 235.684269                                        | 0.029221645                             | 0.044011384                               |
| 118.6772755                              | 264.3607864                                       | -0.080976948                            | 0.041639973                               |
| 95.33798701                              | 182.3560333                                       | -0.561634069                            | 0.053803304                               |
| 75.35810472                              | 174.6088543                                       | 0.184642345                             | 0.056990987                               |
| 47.17765953                              | 156.5378113                                       | -0.061630547                            | 0.069046242                               |
| 90.36527712                              | 223.0013695                                       | 0.430811775                             | 0.053168027                               |
| 91.88472639                              | 193.8584251                                       | 0.475782123                             | 0.051634664                               |
| 41.72489438                              | 106.845336                                        | 0.341139966                             | 0.084293629                               |
| 41.13509817                              | 105.6704035                                       | 0.325799295                             | 0.088597884                               |
| 81.48714991                              | 186.0364304                                       | -0.313908771                            | 0.055320776                               |
| 86.87704815                              | 167.5711098                                       | 0.472630557                             | 0.055562858                               |
| 91.54894411                              | 190.7375088                                       | -0.388095816                            | 0.057460898                               |
| 98.82513821                              | 233.2372513                                       | 0.256928156                             | 0.047676363                               |
| 82.26319651                              | 224.3315487                                       | -0.182537956                            | 0.059261196                               |
| 86.91507451                              | 198.5963516                                       | 0.41822842                              | 0.052710342                               |
| 86.67240305                              | 212.189209                                        | 0.403729891                             | 0.053730739                               |
| 92.73765384                              | 231.3492279                                       | 0.157552622                             | 0.050663787                               |
| 58.1702484                               | 143.8444357                                       | 0.59630246                              | 0.067370335                               |
| 48.86632124                              | 130.0996952                                       | 0.463224613                             | 0.072798737                               |
| 51.78966887                              | 107.3166666                                       | 0.540366318                             | 0.080278597                               |
| 113.4635894                              | 249.0732098                                       | -0.080186612                            | 0.044626225                               |
| 77.93649371                              | 207.0070572                                       | 0.036981089                             | 0.054451871                               |
| 93.96051851                              | 225.802125                                        | 0.497759892                             | 0.053754367                               |
| 88.21633743                              | 224.5077057                                       | 0.114592815                             | 0.050542855                               |
| 74.14435728                              | 193.6895313                                       | 0.33613112                              | 0.05737979                                |
| 122.8316391                              | 284.2857227                                       | 0.087896312                             | 0.041611552                               |
| 121.1227869                              | 259.7243118                                       | -0.1081889                              | 0.041931711                               |
| 88.08379467                              | 190.8813725                                       | 0.078653139                             | 0.052457236                               |
| 98.1616114                               | 149.4904404                                       | -0.829472816                            | 0.063115339                               |
| 62.61479481                              | 175.4013367                                       | 0.354069888                             | 0.060142809                               |
| 48.32025815                              | 119.6474743                                       | 0.660215988                             | 0.078401149                               |
| 97.0803299                               | 229.4984169                                       | 0.363902499                             | 0.050283834                               |
| 124.4777539                              | 264.7875347                                       | -0.427204801                            | 0.046045508                               |
| 43.20228692                              | 158.597847                                        | -0.12339925                             | 0.069963272                               |
| 78.50420745                              | 177.2947731                                       | -0.572962159                            | 0.062312925                               |
| 75.19025981                              | 167.3783798                                       | 0.211432354                             | 0.058427246                               |
| 104.9672007                              | 244.2725554                                       | 0.506170812                             | 0.047159515                               |
| 57.01388279                              | 143.7855978                                       | 0.096623646                             | 0.070398398                               |
| 56.85619677                              | 146.5495615                                       | 0.321466088                             | 0.066074689                               |
| 50.62677626                              | 149.2432318                                       | 0.3399463                               | 0.067090965                               |
| 204.4059539                              | 391.9906769                                       | -0.065728542                            | 0.039947507                               |
| 72.27527629                              | 162.2456989                                       | -0.256638699                            | 0.057472461                               |
| 110.7177745                              | 200.5312424                                       | -0.445131106                            | 0.055852998                               |
| 67.43397134                              | 146.9198418                                       | -0.210749307                            | 0.068664239                               |
| 85.26382416                              | 179.0210457                                       | 0.701004957                             | 0.05473636                                |

| log.sigma.3.0.mm.3D_firstorder_MeanAbsoluteDeviation | log.sigma.3.0.mm.3D_firstorder_Energy | log.sigma.3.0.mm.3D_firstorder_RobustMeanAbsoluteDeviation | log.sigma.3.0.mm.3D_firstorder_Median |
|------------------------------------------------------|---------------------------------------|------------------------------------------------------------|---------------------------------------|
| 113.8997177                                          | 14328185.49                           | 81.31351294                                                | -19.20932007                          |
| 89.16116174                                          | 28493115.31                           | 59.49415299                                                | -16.61746979                          |
| 102.4849578                                          | 7358189.05                            | 74.06660322                                                | -49.30753899                          |
| 118.1904203                                          | 55670102.96                           | 86.45328604                                                | 23.96698761                           |
| 123.2283427                                          | 8734035.633                           | 84.45988268                                                | 8.683661461                           |
| 92.54141593                                          | 9355737.053                           | 70.22421582                                                | -46.39082336                          |
| 68.71049056                                          | 2744608.533                           | 43.94444104                                                | -0.759144068                          |
| 138.9054934                                          | 27428827.66                           | 105.5443498                                                | -2.312566638                          |
| 127.2851206                                          | 51589627.35                           | 92.68987579                                                | -29.68364143                          |
| 88.73707443                                          | 41689182.98                           | 60.1483772                                                 | -38.64488792                          |
| 98.75942744                                          | 12335439.77                           | 75.36384655                                                | -14.18089485                          |
| 105.4598935                                          | 25618516.27                           | 75.16275246                                                | -33.85287476                          |
| 95.25740663                                          | 28924603.98                           | 68.23522417                                                | 3.429697633                           |
| 107.6425025                                          | 17590786.06                           | 84.07427363                                                | 8.173342228                           |
| 96.82470461                                          | 13451929.03                           | 69.10312052                                                | 17.09539223                           |
| 57.90469786                                          | 51610738.27                           | 30.52193174                                                | -1.798704386                          |
| 119.9745497                                          | 14751911.82                           | 91.4260905                                                 | -14.47946167                          |
| 111.1451927                                          | 42654413.96                           | 80.98776941                                                | -29.16521931                          |
| 134.4304949                                          | 15350856.54                           | 99.83055041                                                | 28.52567768                           |
| 76.03356141                                          | 26370576.23                           | 52.79556363                                                | -8.711318016                          |
| 73.42166406                                          | 51861770.27                           | 49.08148757                                                | -39.22004318                          |
| 104.7665767                                          | 29143793.55                           | 74.67569853                                                | 1.670748711                           |
| 91.4189855                                           | 37126533.92                           | 63.13747594                                                | -34.44245529                          |
| 109.0970239                                          | 8920252.249                           | 77.35865382                                                | 25.31532097                           |
| 80.78574509                                          | 14711444.9                            | 56.21032984                                                | -63.16250801                          |
| 113.156236                                           | 14832652.96                           | 79.64258561                                                | -49.35251236                          |
| 68.12421153                                          | 31028065.6                            | 41.81617351                                                | -11.49278545                          |
| 93.48862995                                          | 22544979.49                           | 64.30312933                                                | -60.70106125                          |
| 132.1988022                                          | 40061384.6                            | 106.6800969                                                | 29.02217102                           |
| 88.26067286                                          | 37294025.3                            | 59.13421679                                                | -39.77894211                          |
| 84.19087846                                          | 38964311.75                           | 58.58907509                                                | -51.71727371                          |
| 90.69188655                                          | 77038959.63                           | 63.37875989                                                | -8.558350086                          |
| 117.343251                                           | 39972788.31                           | 88.44363059                                                | 7.489667892                           |
| 121.5531698                                          | 2573741.389                           | 81.4214792                                                 | 3.724483132                           |
| 127.5058212                                          | 7910294.148                           | 92.96250913                                                | 16.04154205                           |
| 113.4033532                                          | 35990746.54                           | 87.80973092                                                | -8.839571476                          |
| 111.1208621                                          | 53264923.39                           | 81.97549234                                                | -41.52837181                          |
| 89.46148534                                          | 39826589.48                           | 65.59623131                                                | 3.032170057                           |
| 96.02966208                                          | 12862970.24                           | 63.84757219                                                | 21.55729103                           |
| 108.994151                                           | 19046386.29                           | 80.21283175                                                | -13.9456501                           |
| 90.13083797                                          | 19474537.54                           | 62.29005613                                                | -21.10351276                          |
| 122.9221789                                          | 21206239.76                           | 91.94766625                                                | -12.25798321                          |
| 117.2448914                                          | 31687621.58                           | 91.33035827                                                | -7.520020485                          |
| 126.6227118                                          | 24346686.63                           | 93.14314544                                                | -5.575222015                          |
| 103.8608378                                          | 29794360.61                           | 76.43905729                                                | -5.421930313                          |
| 75.8735446                                           | 19879184.9                            | 55.36224435                                                | -39.26229668                          |
| 104.6934827                                          | 70651461.67                           | 75.52205758                                                | 3.520821095                           |
| 110.2879471                                          | 10972823.99                           | 84.324359                                                  | -36.56878662                          |
| 108.0490447                                          | 3134180.66                            | 60.26665071                                                | 16.51718426                           |
| 119.2959921                                          | 12310643.32                           | 75.19092587                                                | 33.13806152                           |
| 90.6422141                                           | 44335668.26                           | 64.30427957                                                | -12.18621111                          |
| 124.9192117                                          | 18300702.41                           | 105.1369882                                                | -31.77444077                          |
| 104.2903045                                          | 64994403.69                           | 74.5239151                                                 | -16.1543293                           |
| 88.54940768                                          | 7094753.145                           | 63.22335006                                                | 9.372306824                           |
| 76.24234534                                          | 70067333.09                           | 47.6550106                                                 | -4.680440426                          |
| 131.079277                                           | 22340246.59                           | 97.86486828                                                | -24.70269585                          |
| 140.3563923                                          | 61879453.33                           | 106.9634774                                                | -17.96134949                          |
| 114.8573953                                          | 27293566.55                           | 77.9238472                                                 | 23.49733734                           |
| 100.9491069                                          | 13563622.89                           | 72.0786871                                                 | -34.33626175                          |
| 83.5910113                                           | 9056147.431                           | 63.13960339                                                | -14.77614689                          |
| 118.9093173                                          | 43243298.5                            | 90.5591988                                                 | -43.39527512                          |
| 111.1200515                                          | 105902018.9                           | 78.84558955                                                | 0.47984229                            |
| 69.50863981                                          | 26218906.03                           | 45.71731677                                                | 8.789849281                           |
| 71.69866242                                          | 25419063.65                           | 46.38532707                                                | -12.2183466                           |
| 106.6423109                                          | 3988519.699                           | 77.05391711                                                | -30.49305534                          |
| 105.1486495                                          | 30743931.01                           | 69.33995297                                                | 23.7494297                            |
| 116.440267                                           | 8610716.738                           | 81.40828052                                                | 1.277973354                           |
| 123.1351596                                          | 69548767.62                           | 92.94129961                                                | -6.426157475                          |
| 115.0256063                                          | 9491364.091                           | 90.9500086                                                 | -29.1050415                           |
| 111.4135857                                          | 37331217.96                           | 81.41651008                                                | -19.68318176                          |
| 113.3892872                                          | 56824709.38                           | 84.58985594                                                | -34.45009232                          |
| 120.2223668                                          | 23593218.05                           | 92.99463068                                                | -28.05837631                          |
| 86.8949801                                           | 63686990.87                           | 60.47312618                                                | -16.94574928                          |
| 80.00606998                                          | 72069916.8                            | 55.50460288                                                | -26.81138802                          |
| 77.79900631                                          | 107246680.9                           | 47.67631086                                                | 11.13430166                           |
| 135.1646079                                          | 29458540.62                           | 103.2297915                                                | -20.58603096                          |
| 109.6122409                                          | 20878857.65                           | 82.70072714                                                | -35.70354843                          |
| 118.7723237                                          | 13852233.56                           | 90.18755259                                                | -57.60561562                          |
| 117.862007                                           | 39920488.49                           | 89.19822386                                                | -70.37605286                          |
| 104.0561243                                          | 46041027.23                           | 78.11662654                                                | -46.34214401                          |
| 146.4120362                                          | 18623194.11                           | 112.7954906                                                | -92.4654808                           |
| 139.0160913                                          | 37034041.72                           | 104.7053867                                                | 0.225550234                           |
| 109.2995333                                          | 54133731.27                           | 77.0265434                                                 | 19.21265316                           |
| 102.414613                                           | 2799286.493                           | 62.03635451                                                | 34.24332428                           |
| 96.79392723                                          | 46081929.7                            | 71.88331213                                                | -10.71641922                          |
| 76.3769087                                           | 55331242.54                           | 49.83476174                                                | 13.61844158                           |
| 122.7676329                                          | 17095880.06                           | 94.13033954                                                | -48.93367958                          |
| 139.2637031                                          | 43361794.83                           | 106.4069247                                                | 2.05803597                            |
| 85.89551484                                          | 1934233.59                            | 63.57696771                                                | -2.206636667                          |
| 106.2525882                                          | 2059671.117                           | 74.71458341                                                | -24.86768341                          |
| 100.3462065                                          | 67021490.96                           | 68.24745568                                                | -6.347349167                          |
| 131.7861006                                          | 20319481.89                           | 98.11668997                                                | -76.58669662                          |
| 86.19964568                                          | 12902306.71                           | 59.00724748                                                | -20.51987076                          |
| 89.22069746                                          | 51026524.25                           | 63.46213716                                                | -16.04197645                          |
| 85.3295711                                           | 64200884.68                           | 61.72995612                                                | -8.550374508                          |
| 188.37815                                            | 12164162.83                           | 151.6309578                                                | -19.05929756                          |
| 100.4968716                                          | 19792462.84                           | 69.19770483                                                | 24.17695713                           |
| 120.807656                                           | 2788019.045                           | 81.66451951                                                | 21.52355194                           |
| 87.98260091                                          | 4865726.705                           | 60.02859348                                                | 26.30660439                           |
| 112.2500646                                          | 18194985.09                           | 74.13751476                                                | -53.85694122                          |

| log.sigma.3.0.mm.3D_firstorder_TotalEnergy | log.sigma.3.0.mm.3D_firstorder_Maximum | log.sigma.3.0.mm.3D_firstorder_RootMeanSquared | log.sigma.3.0.mm.3D_firstorder_90Percentile | log.sigma.3.0.mm.3D_firstorder_Minimum |
|--------------------------------------------|----------------------------------------|------------------------------------------------|---------------------------------------------|----------------------------------------|
| 386861008.3                                | 389.4571228                            | 142.4601007                                    | 166.6337051                                 | -375.2703857                           |
| 769314113.3                                | 433.3812561                            | 117.1255706                                    | 150.6733582                                 | -363.0543518                           |
| 198671104.3                                | 364.6506348                            | 130.2088808                                    | 135.5354187                                 | -281.4712524                           |
| 1503092780                                 | 455.7863159                            | 145.3518964                                    | 199.3696625                                 | -373.3244934                           |
| 235818962.1                                | 372.7202759                            | 155.9768895                                    | 210.1552948                                 | -386.4910889                           |
| 252604900.4                                | 250.5051422                            | 120.623942                                     | 94.96691132                                 | -301.4017029                           |
| 74104430.38                                | 251.6296997                            | 90.24543739                                    | 103.7737274                                 | -261.9385071                           |
| 740578346.8                                | 461.8536987                            | 165.4511393                                    | 188.2438614                                 | -418.9519348                           |
| 1392919939                                 | 437.0761414                            | 157.5266186                                    | 180.0650208                                 | -403.6027832                           |
| 1125607940                                 | 446.0679321                            | 116.0034713                                    | 140.181514                                  | -334.9717407                           |
| 333056873.8                                | 182.0520325                            | 122.1306206                                    | 101.7723541                                 | -425.3685608                           |
| 691699939.3                                | 407.9152832                            | 131.4779382                                    | 168.0843338                                 | -306.8177795                           |
| 780964307.4                                | 421.1288147                            | 118.0944084                                    | 156.6380005                                 | -261.0873718                           |
| 474951223.7                                | 356.0329285                            | 125.4358629                                    | 158.7645081                                 | -297.5482788                           |
| 363202083.9                                | 342.8427734                            | 121.5158965                                    | 180.9899902                                 | -296.7142334                           |
| 1393488933                                 | 551.9355469                            | 86.19287883                                    | 110.8834244                                 | -311.8578796                           |
| 398301619.2                                | 349.1339417                            | 145.3772477                                    | 141.884845                                  | -356.7748108                           |
| 1151669177                                 | 417.598938                             | 135.2439096                                    | 174.0729248                                 | -373.7210083                           |
| 414473126.7                                | 375.7587585                            | 162.4070262                                    | 211.6312958                                 | -343.5721436                           |
| 712005558.1                                | 348.1170349                            | 97.0293798                                     | 116.9715729                                 | -238.5902405                           |
| 1400267797                                 | 401.429718                             | 99.63733075                                    | 103.5346199                                 | -359.0195618                           |
| 786882425.8                                | 527.46875                              | 130.1693743                                    | 173.1649963                                 | -298.337616                            |
| 1002416416                                 | 371.6616516                            | 116.5953829                                    | 142.9627991                                 | -313.7903442                           |
| 240846810.7                                | 313.901123                             | 136.1808466                                    | 170.7784576                                 | -456.2715759                           |
| 397209012.4                                | 381.9169312                            | 110.5387175                                    | 96.42359085                                 | -304.1859131                           |
| 400481630                                  | 419.6791077                            | 146.194045                                     | 153.134473                                  | -360.1247253                           |
| 837757771.3                                | 421.0501099                            | 94.61567049                                    | 118.1734161                                 | -408.76651                             |
| 608714446.4                                | 364.2230225                            | 125.4301169                                    | 141.4446075                                 | -328.1898193                           |
| 1081657384                                 | 381.9503784                            | 150.6574536                                    | 188.8008972                                 | -368.8318481                           |
| 1006938683                                 | 568.2888794                            | 121.124461                                     | 112.402729                                  | -370.237793                            |
| 1052036417                                 | 353.2926331                            | 110.7103543                                    | 115.1484085                                 | -368.0816345                           |
| 2080051910                                 | 433.780304                             | 113.9797914                                    | 166.308696                                  | -328.5793457                           |
| 1079265284                                 | 470.0826721                            | 140.2211525                                    | 174.9597046                                 | -282.0050354                           |
| 69491017.49                                | 329.0187683                            | 157.3134239                                    | 221.6707596                                 | -441.9709717                           |
| 213577942                                  | 284.9695435                            | 154.3573361                                    | 173.7015366                                 | -396.5435486                           |
| 971750156.4                                | 374.6818848                            | 133.4810895                                    | 157.3439682                                 | -372.8541565                           |
| 1438152932                                 | 539.5236206                            | 539.5954597                                    | 172.5604446                                 | -320.8730164                           |
| 1075317916                                 | 337.1065674                            | 108.9695179                                    | 143.8001083                                 | -297.7510681                           |
| 347300196.5                                | 379.0187378                            | 124.1158925                                    | 158.783136                                  | -374.8517456                           |
| 514252429.8                                | 357.3292847                            | 134.7468279                                    | 139.5273346                                 | -336.1302795                           |
| 525812513.5                                | 377.3638916                            | 114.9436105                                    | 140.4864166                                 | -323.381073                            |
| 572568473.6                                | 422.4692993                            | 149.1713374                                    | 161.0326996                                 | -386.2203674                           |
| 855565782.7                                | 363.0499573                            | 138.9179114                                    | 138.5811691                                 | -369.8986206                           |
| 657360538.9                                | 446.3733521                            | 154.1196451                                    | 187.546344                                  | -394.7714844                           |
| 804447736.5                                | 331.2658691                            | 125.9561104                                    | 143.8698883                                 | -413.1137085                           |
| 536737992.2                                | 326.6099548                            | 94.45864107                                    | 119.5268707                                 | -194.5423889                           |
| 1907589465                                 | 416.643158                             | 128.6915851                                    | 180.2616577                                 | -350.1347961                           |
| 296266247.8                                | 327.8518982                            | 137.1907812                                    | 120.3832184                                 | -292.8562927                           |
| 84622877.82                                | 285.387207                             | 152.9359602                                    | 198.829689                                  | -519.1397095                           |
| 332387369.7                                | 487.5763855                            | 157.3845802                                    | 188.7314636                                 | -403.0277405                           |
| 1197063043                                 | 453.0612793                            | 113.7914814                                    | 141.3322632                                 | -321.7616882                           |
| 494118965.1                                | 202.2836456                            | 148.7582719                                    | 117.9715942                                 | -341.662384                            |
| 1754848900                                 | 472.0500793                            | 130.4215817                                    | 159.6474152                                 | -389.4977722                           |
| 191558334.9                                | 281.0594177                            | 109.5657723                                    | 140.7766113                                 | -277.6347961                           |
| 1891817993                                 | 422.0577393                            | 103.641599                                     | 147.6688599                                 | -268.989624                            |
| 603186657.9                                | 446.5326843                            | 159.4224737                                    | 176.4314514                                 | -363.3684998                           |
| 1670745240                                 | 439.4702454                            | 167.9785849                                    | 184.2670776                                 | -455.0783386                           |
| 736926296.7                                | 390.3078918                            | 145.2883804                                    | 156.2065704                                 | -455.0286255                           |
| 366217817.9                                | 313.8818054                            | 129.0849619                                    | 144.0992523                                 | -355.2415161                           |
| 244515980.6                                | 257.0401611                            | 101.3873537                                    | 111.1961823                                 | -327.7084656                           |
| 1167569059                                 | 435.2921143                            | 142.8545012                                    | 163.2773193                                 | -308.0357666                           |
| 285935451.1                                | 603.8311768                            | 139.0404312                                    | 177.0694138                                 | -335.935791                            |
| 707910462.9                                | 445.0463257                            | 92.11450949                                    | 131.6960892                                 | -313.5485229                           |
| 686314718.6                                | 310.567749                             | 96.47591901                                    | 128.3422089                                 | -379.1109924                           |
| 107690031.9                                | 203.707016                             | 135.5738733                                    | 134.1643677                                 | -357.7891541                           |
| 830086137.2                                | 571.3248901                            | 140.6999589                                    | 212.6066528                                 | -330.1938477                           |
| 232489351.9                                | 363.1116943                            | 147.8330511                                    | 123.7153183                                 | -432.1942749                           |
| 1877816726                                 | 440.7946167                            | 147.4936765                                    | 188.6714752                                 | -352.9858093                           |
| 256266830.4                                | 262.3097839                            | 145.8803805                                    | 94.79065704                                 | -340.9823608                           |
| 1007942885                                 | 458.1038513                            | 136.2479713                                    | 185.5278931                                 | -343.825531                            |
| 1534267153                                 | 412.2368774                            | 136.7199276                                    | 185.2712387                                 | -357.6522522                           |
| 637016887.2                                | 400.6759949                            | 144.5594941                                    | 144.2307617                                 | -341.3785706                           |
| 1719548754                                 | 405.9259949                            | 111.0105137                                    | 139.9520538                                 | -299.7346497                           |
| 1945887754                                 | 353.2569275                            | 103.5909144                                    | 126.1838608                                 | -381.041626                            |
| 2895660385                                 | 535.8582764                            | 108.0862849                                    | 152.0987946                                 | -402.8782043                           |
| 795380596.7                                | 417.6200867                            | 162.4701258                                    | 160.4651642                                 | -422.2161865                           |
| 563729156.5                                | 394.5335388                            | 136.7183411                                    | 117.9784073                                 | -389.0985107                           |
| 374010306.2                                | 364.1020508                            | 150.6936615                                    | 137.4093414                                 | -283.2835693                           |
| 1077853189                                 | 309.3871155                            | 150.4349109                                    | 146.3197327                                 | -441.3829651                           |
| 1243107735                                 | 412.4796143                            | 127.1906113                                    | 147.0916214                                 | -345.2749329                           |
| 502826240.9                                | 375.0434265                            | 192.2258618                                    | 135.6895004                                 | -488.6073303                           |
| 999919126.5                                | 448.6183777                            | 168.1828363                                    | 193.7088776                                 | -442.8442078                           |
| 1461610744                                 | 477.4572449                            | 139.2439307                                    | 200.938858                                  | -368.1492615                           |
| 75580735.3                                 | 265.68396                              | 138.9439602                                    | 186.2899048                                 | -439.2629089                           |
| 1244212102                                 | 370.4486694                            | 116.5739289                                    | 164.7576904                                 | -279.6493835                           |
| 1493943549                                 | 511.6288757                            | 100.5202342                                    | 134.9028397                                 | -368.4139709                           |
| 461588761.6                                | 370.5270386                            | 148.2367663                                    | 160.6644272                                 | -305.5701904                           |
| 1170768460                                 | 326.5059204                            | 167.1505333                                    | 157.6275024                                 | -484.692749                            |
| 52224306.93                                | 199.6329193                            | 102.8084746                                    | 137.1824371                                 | -287.0647583                           |
| 55611120.15                                | 191.4218292                            | 140.0568292                                    | 91.69187622                                 | -410.4309082                           |
| 1809580256                                 | 492.9114075                            | 129.8489601                                    | 168.212793                                  | -426.8202515                           |
| 548626010.9                                | 426.5518494                            | 169.6500392                                    | 170.2668839                                 | -384.3748169                           |
| 348362281                                  | 323.572876                             | 112.3590951                                    | 128.0204826                                 | -362.4336853                           |
| 1377716155                                 | 400.9478149                            | 111.6956705                                    | 125.4927353                                 | -307.6206055                           |
| 1733423886                                 | 395.7558594                            | 105.1554995                                    | 130.1694412                                 | -269.4247437                           |
| 328432396.4                                | 405.9993591                            | 219.2708257                                    | 215.5263977                                 | -459.0435181                           |
| 534396496.6                                | 341.8552856                            | 127.5801568                                    | 171.9007187                                 | -374.2167053                           |
| 75276514.23                                | 281.4660645                            | 150.5550448                                    | 172.1877502                                 | -371.9171143                           |
| 131374621                                  | 282.888092                             | 113.3063504                                    | 155.0722748                                 | -265.621582                            |
| 491264597.3                                | 540.3064575                            | 150.1547532                                    | 162.9332367                                 | -446.5859985                           |

| log.sigma.3.0.mm.3D_firstorder_Entropy | log.sigma.3.0.mm.3D_firstorder_StandardDeviation | log.sigma.3.0.mm.3D_firstorder_Range | log.sigma.3.0.mm.3D_firstorder_Variance | log.sigma.3.0.mm.3D_firstorder_10Percentile |
|----------------------------------------|--------------------------------------------------|--------------------------------------|-----------------------------------------|---------------------------------------------|
| 4.493829152                            | 141.241456                                       | 764.7275085                          | 19949.14891                             | -201.7413025                                |
| 4.195694145                            | 116.3307954                                      | 796.4356079                          | 13532.85397                             | -163.5333466                                |
| 4.264163233                            | 125.4091137                                      | 646.1218872                          | 15727.44581                             | -191.1331055                                |
| 4.545841456                            | 143.8755101                                      | 829.1108093                          | 20700.1624                              | -175.3140015                                |
| 4.607285772                            | 155.9677153                                      | 759.2113647                          | 24325.92821                             | -211.1699066                                |
| 4.119198672                            | 109.7997733                                      | 551.9068451                          | 12055.99021                             | -192.4666809                                |
| 3.834354015                            | 90.13753772                                      | 513.5682068                          | 8124.775706                             | -123.1871063                                |
| 4.677263301                            | 164.4857839                                      | 880.8056335                          | 27055.57311                             | -243.2470459                                |
| 4.648659922                            | 155.2430903                                      | 840.6789246                          | 24100.41709                             | -232.7164063                                |
| 4.160497748                            | 113.4711655                                      | 781.0396729                          | 12875.7054                              | -150.6561966                                |
| 4.119334969                            | 117.0105862                                      | 607.4205933                          | 13691.47728                             | -206.9528992                                |
| 4.377938869                            | 130.3398266                                      | 714.7330627                          | 16988.4704                              | -172.0912201                                |
| 4.224702021                            | 117.9275204                                      | 682.2161865                          | 13906.90006                             | -140.4801559                                |
| 4.277788316                            | 125.4203697                                      | 653.5812073                          | 15730.26913                             | -166.0805542                                |
| 4.29077844                             | 119.9427321                                      | 639.5570068                          | 14386.25899                             | -139.3282623                                |
| 3.592572674                            | 86.0402473                                       | 863.7934265                          | 7402.924156                             | -94.4749527                                 |
| 4.461952449                            | 141.8038745                                      | 705.9087524                          | 20108.33882                             | -234.2624039                                |
| 4.391280868                            | 134.9136618                                      | 691.3199463                          | 18201.69615                             | -173.3996567                                |
| 4.631483439                            | 161.9940017                                      | 719.3309021                          | 26242.0566                              | -225.5556915                                |
| 3.949131518                            | 96.6957395                                       | 586.7072754                          | 9350.066037                             | -134.9034882                                |
| 3.925929263                            | 94.99864475                                      | 760.4492798                          | 9024.742505                             | -139.422821                                 |
| 4.375199722                            | 130.0317526                                      | 825.806366                           | 16908.25669                             | -159.4392395                                |
| 4.188588861                            | 115.0683055                                      | 685.4519958                          | 13240.71493                             | -153.6702118                                |
| 4.404543936                            | 135.6774741                                      | 770.172699                           | 18408.37697                             | -163.914505                                 |
| 3.982608445                            | 100.9919662                                      | 686.1028442                          | 10199.37724                             | -157.2703537                                |
| 4.468733983                            | 141.4765025                                      | 779.803833                           | 20015.60076                             | -212.7205582                                |
| 3.846599251                            | 94.33283241                                      | 829.8166199                          | 8898.68327                              | -116.4715462                                |
| 4.182883903                            | 118.185089                                       | 692.4128418                          | 13967.71526                             | -181.2905273                                |
| 4.450415349                            | 150.5183118                                      | 750.7822266                          | 22655.76218                             | -201.6218079                                |
| 4.18290297                             | 114.4026775                                      | 938.5266724                          | 13087.97262                             | -181.2104843                                |
| 4.063904856                            | 105.5366607                                      | 721.3742676                          | 11137.98675                             | -153.8917938                                |
| 4.171809968                            | 113.6193371                                      | 716.3596497                          | 12909.35376                             | -126.6583023                                |
| 4.480720411                            | 140.2197062                                      | 798.0877075                          | 19661.56602                             | -188.7249146                                |
| 4.456745933                            | 157.0090658                                      | 770.88974                            | 24651.84674                             | -192.6250671                                |
| 4.526833313                            | 153.5783048                                      | 681.513092                           | 23586.29571                             | -232.3209518                                |
| 4.377839675                            | 132.720431                                       | 747.5360413                          | 17614.71281                             | -193.847998                                 |
| 4.367422292                            | 134.6612177                                      | 860.396637                           | 18133.64355                             | -171.9256912                                |
| 4.147708037                            | 108.9677659                                      | 634.8576355                          | 11873.974                               | -141.619838                                 |
| 4.297873485                            | 123.6062016                                      | 753.8704834                          | 15278.49308                             | -157.7199707                                |
| 4.38867821                             | 132.7057915                                      | 693.4595642                          | 17610.8271                              | -208.0033417                                |
| 4.206646319                            | 113.9264309                                      | 700.7449646                          | 12979.23167                             | -153.5780655                                |
| 4.5284606                              | 147.5085943                                      | 808.6896667                          | 21758.78539                             | -219.355661                                 |
| 4.381356963                            | 136.5025037                                      | 732.9485779                          | 18632.93351                             | -215.1122055                                |
| 4.609305001                            | 153.7745258                                      | 841.1448364                          | 23646.60478                             | -219.8486298                                |
| 4.350186267                            | 125.3938608                                      | 744.3795776                          | 15723.62034                             | -177.2124985                                |
| 3.810371689                            | 92.17404123                                      | 521.1523438                          | 8496.053876                             | -130.5693954                                |
| 4.393749049                            | 128.520295                                       | 766.7779541                          | 16517.46622                             | -160.3072586                                |
| 4.319749672                            | 130.8648896                                      | 620.7081909                          | 17125.61933                             | -224.7455688                                |
| 4.20227167                             | 152.9202744                                      | 804.5269165                          | 23384.61034                             | -202.1690857                                |
| 4.524215097                            | 157.254773                                       | 890.604126                           | 24729.06363                             | -239.3126953                                |
| 4.19799746                             | 113.4800033                                      | 774.8229675                          | 12877.71115                             | -147.3021149                                |
| 4.176408187                            | 138.7416562                                      | 543.9460297                          | 19249.24715                             | -241.0895477                                |
| 4.391947273                            | 129.9866764                                      | 861.5478516                          | 16896.53604                             | -174.4021912                                |
| 4.132637104                            | 109.5345807                                      | 558.6942139                          | 11997.82438                             | -148.8473969                                |
| 3.958547771                            | 103.637616                                       | 691.0473633                          | 10740.75545                             | -139.1241028                                |
| 4.641048459                            | 157.1781356                                      | 809.9011841                          | 24704.96631                             | -234.4926361                                |
| 4.722976343                            | 166.1548724                                      | 894.548584                           | 27607.44163                             | -246.6200165                                |
| 4.500531628                            | 145.2394553                                      | 845.3365173                          | 21094.49937                             | -219.9546082                                |
| 4.320608421                            | 125.0690836                                      | 669.1233215                          | 15642.27566                             | -193.421521                                 |
| 3.998684685                            | 99.68443634                                      | 584.7486267                          | 9936.986849                             | -150.0008392                                |
| 4.42179821                             | 140.3604449                                      | 743.3278809                          | 19701.05449                             | -190.3126343                                |
| 4.478112986                            | 138.8942874                                      | 939.7669678                          | 19291.62306                             | -167.3479004                                |
| 3.867598549                            | 91.43216182                                      | 758.5948486                          | 8359.840216                             | -110.877401                                 |
| 3.870645854                            | 95.5550203                                       | 689.6787415                          | 9130.853968                             | -130.4239044                                |
| 4.332722775                            | 130.8113494                                      | 561.49617                            | 17111.60914                             | -212.9357758                                |
| 4.451780106                            | 137.1215803                                      | 901.5187378                          | 18802.32777                             | -141.207132                                 |
| 4.436915859                            | 144.4867131                                      | 795.3059692                          | 20876.41027                             | -248.7182663                                |
| 4.52310018                             | 147.4419838                                      | 793.780426                           | 21739.13859                             | -196.2338715                                |
| 4.256306038                            | 133.2349304                                      | 603.2921448                          | 17751.54669                             | -248.6138153                                |
| 4.429575848                            | 136.0799754                                      | 801.9293823                          | 18517.7597                              | -171.3982697                                |
| 4.39493791                             | 136.1726206                                      | 769.8891296                          | 18542.98259                             | -171.9136581                                |
| 4.44318291                             | 140.9915031                                      | 742.0545654                          | 19878.60395                             | -218.0534576                                |
| 4.120487101                            | 110.3841504                                      | 705.6606445                          | 12184.66065                             | -146.5234512                                |
| 4.015025554                            | 101.355352                                       | 734.2985535                          | 10272.90739                             | -144.3264847                                |
| 4.050141842                            | 107.0907036                                      | 938.7364807                          | 11468.41881                             | -116.8134117                                |
| 4.640126251                            | 159.0892202                                      | 839.8362732                          | 25309.38                                | -247.0309296                                |
| 4.377922417                            | 130.6743457                                      | 783.6320496                          | 17075.78462                             | -211.940213                                 |
| 4.380481112                            | 142.5166003                                      | 647.3856201                          | 20310.98136                             | -222.6675537                                |
| 4.459871421                            | 140.6267959                                      | 750.7700806                          | 19775.89573                             | -225.6848724                                |
| 4.290347381                            | 124.3452907                                      | 757.7545471                          | 15461.75133                             | -177.1779785                                |
| 4.72333672                             | 172.4100002                                      | 863.6507568                          | 29725.20816                             | -309.5244629                                |
| 4.722912326                            | 165.6307796                                      | 891.4625854                          | 27433.55514                             | -237.1039124                                |
| 4.469056812                            | 137.500173                                       | 845.6065063                          | 18906.29577                             | -163.2080719                                |
| 4.273519695                            | 138.0298168                                      | 704.9468689                          | 19052.23033                             | -178.2641357                                |
| 4.213821098                            | 116.5486486                                      | 650.098053                           | 13583.5875                              | -138.9787445                                |
| 3.993916066                            | 100.5097639                                      | 880.0428467                          | 10102.21265                             | -113.6006165                                |
| 4.455266249                            | 144.6258132                                      | 676.097229                           | 20916.62584                             | -212.612114                                 |
| 4.62259236                             | 164.4195529                                      | 811.1986694                          | 27033.78938                             | -269.1937724                                |
| 3.951876305                            | 102.7912678                                      | 486.6976776                          | 10566.04473                             | -120.8710449                                |
| 4.222018163                            | 129.8459548                                      | 601.8527374                          | 16859.97197                             | -252.4190002                                |
| 4.386189008                            | 129.7240477                                      | 919.7316589                          | 16828.32855                             | -168.975827                                 |
| 4.584164412                            | 159.0307999                                      | 810.9266663                          | 25291.5205                              | -251.7539444                                |
| 4.129183637                            | 110.3217683                                      | 686.0065613                          | 12170.89257                             | -158.778215                                 |
| 4.157075212                            | 110.5659752                                      | 708.5684204                          | 12224.83488                             | -152.4360916                                |
| 4.081350997                            | 104.8718825                                      | 665.180603                           | 10998.11175                             | -140.1454163                                |
| 4.839842125                            | 214.0437595                                      | 865.0428772                          | 45814.731                               | -340.5980103                                |
| 4.352762479                            | 126.6297247                                      | 716.071991                           | 16035.08719                             | -159.0273895                                |
| 4.315193895                            | 150.5296203                                      | 653.3831787                          | 22659.16658                             | -205.9976227                                |
| 4.127686936                            | 111.7749647                                      | 548.5096741                          | 12493.64273                             | -137.4146973                                |
| 4.492282072                            | 146.1696766                                      | 986.8924561                          | 21365.57436                             | -197.4673706                                |

| log.sigma.3.0.mm.3D_firstorder_Kurtosis | log.sigma.3.0.mm.3D_firstorder_Mean | log.sigma.3.0.mm.3D_glrIm_ShortRunLowGrayLevelEmphasis | log.sigma.3.0.mm.3D_glrIm_GrayLevelVariance |
|-----------------------------------------|-------------------------------------|--------------------------------------------------------|---------------------------------------------|
| 2.798939473                             | -18.59385362                        | 0.008027221                                            | 32.58081555                                 |
| 3.211558064                             | -13.62150196                        | 0.00647983                                             | 23.13676948                                 |
| 2.748922285                             | -35.02722995                        | 0.021311745                                            | 25.39900273                                 |
| 2.506038598                             | 20.66425414                         | 0.008933675                                            | 33.61837215                                 |
| 2.686300482                             | -1.691702528                        | 0.012355211                                            | 39.56761388                                 |
| 2.207664697                             | -49.94141747                        | 0.015522669                                            | 19.37871102                                 |
| 3.410791512                             | -4.4117188                          | 0.016369818                                            | 13.28360967                                 |
| 2.286461167                             | -17.84674731                        | 0.008050845                                            | 43.21722404                                 |
| 2.550228326                             | -26.7248663                         | 0.007633072                                            | 39.05086491                                 |
| 3.341336175                             | -24.10601487                        | 0.008966282                                            | 21.29234872                                 |
| 2.21303496                              | -34.99158755                        | 0.005746637                                            | 22.28979313                                 |
| 2.832656993                             | -17.26203427                        | 0.012743883                                            | 27.9575948                                  |
| 2.925398513                             | 6.276083454                         | 0.015126326                                            | 22.58948662                                 |
| 2.122114645                             | 1.971436931                         | 0.013980292                                            | 25.19099044                                 |
| 2.612362875                             | 19.48984624                         | 0.012602885                                            | 23.67361616                                 |
| 5.840453755                             | 5.127202436                         | 0.006472656                                            | 13.69619878                                 |
| 2.186164321                             | -32.0344398                         | 0.013170326                                            | 32.05589308                                 |
| 2.726008213                             | -9.445576966                        | 0.023499666                                            | 29.63589034                                 |
| 2.223841244                             | 11.57521387                         | 0.01352525                                             | 41.81150903                                 |
| 3.072013755                             | -8.03955892                         | 0.016478034                                            | 15.78408769                                 |
| 3.486482922                             | -30.04754854                        | 0.005977955                                            | 15.44070774                                 |
| 2.989651283                             | 5.98408922                          | 0.01443154                                             | 27.26187736                                 |
| 3.081212726                             | -18.80873163                        | 0.009802942                                            | 21.76987171                                 |
| 3.146959469                             | 11.69811971                         | 0.005857113                                            | 29.84226767                                 |
| 3.229377553                             | -44.93807758                        | 0.011018671                                            | 17.06452091                                 |
| 2.838399205                             | -36.83881158                        | 0.01158999                                             | 32.56457868                                 |
| 4.524160088                             | -7.310392045                        | 0.003900694                                            | 15.86174218                                 |
| 2.946630281                             | -42.01189088                        | 0.009486606                                            | 23.01751812                                 |
| 1.852049715                             | 6.473495528                         | 0.008598189                                            | 36.26007644                                 |
| 3.836136837                             | -39.78897373                        | 0.008633566                                            | 22.69617265                                 |
| 3.202781459                             | -33.44840518                        | 0.006526817                                            | 18.48455872                                 |
| 3.028548129                             | 9.057543719                         | 0.009557199                                            | 21.44956125                                 |
| 2.370594448                             | 0.636868405                         | 0.009920935                                            | 31.78574992                                 |
| 3.004700419                             | 9.780931109                         | 0.01504665                                             | 39.73323552                                 |
| 2.406841611                             | -15.48843071                        | 0.017048712                                            | 38.14664955                                 |
| 2.127754398                             | -14.22984356                        | 0.00817105                                             | 28.33693821                                 |
| 2.810481776                             | -19.00319757                        | 0.012059977                                            | 29.68213513                                 |
| 2.544247067                             | 0.617928874                         | 0.012322237                                            | 19.47226769                                 |
| 3.260625527                             | 11.2366231                          | 0.008465682                                            | 25.04141967                                 |
| 2.449242958                             | -23.36408596                        | 0.012700969                                            | 28.5000239                                  |
| 2.956634619                             | -15.25784839                        | 0.012357519                                            | 21.52181615                                 |
| 2.420305023                             | -22.21041425                        | 0.008837433                                            | 34.80817656                                 |
| 2.108375018                             | -25.79249111                        | 0.012697766                                            | 30.11303656                                 |
| 2.459077147                             | -10.30825979                        | 0.008867311                                            | 37.98376349                                 |
| 2.536287628                             | -11.88786841                        | 0.005512619                                            | 25.53611806                                 |
| 2.653418212                             | -20.64899507                        | 0.040387248                                            | 13.9358395                                  |
| 2.602019681                             | 6.637608586                         | 0.006366946                                            | 26.9243796                                  |
| 2.13527693                              | -41.17877027                        | 0.040060683                                            | 27.57982836                                 |
| 4.188179958                             | -2.190336266                        | 0.012865973                                            | 38.48314461                                 |
| 3.279196893                             | 6.390810165                         | 0.011061307                                            | 40.25424728                                 |
| 3.085501482                             | -8.413684708                        | 0.009330502                                            | 21.45178725                                 |
| 1.600544547                             | -53.66354736                        | 0.017085026                                            | 30.45118577                                 |
| 2.919045541                             | -10.64203631                        | 0.005710199                                            | 27.93142149                                 |
| 2.520751193                             | 2.614205894                         | 0.013192582                                            | 19.44759714                                 |
| 3.503969544                             | -0.908617813                        | 0.01279004                                             | 18.50575911                                 |
| 2.361249619                             | -26.65630925                        | 0.021089155                                            | 39.62646866                                 |
| 2.246835524                             | -24.68528627                        | 0.006034484                                            | 44.11907583                                 |
| 3.076981265                             | -3.770162398                        | 0.005819476                                            | 34.62725797                                 |
| 2.544186339                             | -31.94764024                        | 0.009334308                                            | 25.69905904                                 |
| 2.360631044                             | -18.50428724                        | 0.008103696                                            | 16.1298686                                  |
| 2.462583049                             | -26.57732038                        | 0.014599294                                            | 31.91555655                                 |
| 3.459728057                             | 6.37325974                          | 0.008370575                                            | 31.77156173                                 |
| 3.683190589                             | 11.19118597                         | 0.006479379                                            | 14.22902988                                 |
| 3.408284669                             | -13.29469749                        | 0.005227156                                            | 15.9995259                                  |
| 2.438085701                             | -35.61833752                        | 0.017117033                                            | 27.59444658                                 |
| 3.507603916                             | 31.53015484                         | 0.0074321                                              | 31.13837246                                 |
| 2.831778936                             | -31.27620085                        | 0.008904525                                            | 33.75886824                                 |
| 2.363276326                             | -3.904616395                        | 0.007248138                                            | 35.10173097                                 |
| 2.000000663                             | -59.409921                          | 0.023764208                                            | 28.01426314                                 |
| 2.672603888                             | -6.763873125                        | 0.009448426                                            | 30.13222617                                 |
| 2.387173907                             | -12.22113                           | 0.007169235                                            | 29.96215302                                 |
| 2.229587922                             | -31.91932633                        | 0.013118524                                            | 31.94183811                                 |
| 3.249395304                             | -11.77597109                        | 0.01065825                                             | 20.43377684                                 |
| 3.029041895                             | -21.40490971                        | 0.004820744                                            | 17.21748142                                 |
| 4.335969802                             | 14.63646735                         | 0.003605934                                            | 19.87645048                                 |
| 2.24667231                              | -32.97213638                        | 0.010699639                                            | 40.66307023                                 |
| 2.505972895                             | -40.20099705                        | 0.008757239                                            | 27.58486284                                 |
| 2.575094828                             | -48.96527599                        | 0.032974659                                            | 32.69960726                                 |
| 2.293350124                             | -53.43001662                        | 0.007197915                                            | 31.77944009                                 |
| 2.449148888                             | -26.75257482                        | 0.009300983                                            | 24.94197837                                 |
| 2.120203864                             | -85.00337519                        | 0.008956165                                            | 47.62845823                                 |
| 2.32375437                              | -13.53439777                        | 0.00812179                                             | 44.19590932                                 |
| 2.732846893                             | 21.96758207                         | 0.007096763                                            | 30.90321688                                 |
| 3.857106431                             | 15.91206319                         | 0.013049551                                            | 31.6654249                                  |
| 2.484217337                             | 2.427631149                         | 0.010174347                                            | 21.96043288                                 |
| 4.122392471                             | -1.450805711                        | 0.005077454                                            | 17.28003436                                 |
| 2.325270485                             | -32.51942582                        | 0.017613565                                            | 33.53593576                                 |
| 2.232940529                             | -30.09171667                        | 0.005885975                                            | 43.02640942                                 |
| 2.47300604                              | 1.880885701                         | 0.015728197                                            | 16.9917184                                  |
| 2.779485828                             | -52.4970802                         | 0.018869581                                            | 27.51381061                                 |
| 3.18303209                              | -5.694198157                        | 0.004374561                                            | 28.44725349                                 |
| 2.568804794                             | -59.072966                          | 0.011241879                                            | 40.6370104                                  |
| 2.891601967                             | -21.29961681                        | 0.007656334                                            | 20.73878164                                 |
| 3.091407149                             | -15.84575394                        | 0.010880184                                            | 20.40768916                                 |
| 2.828358388                             | -7.71986886                         | 0.014381179                                            | 18.17999466                                 |
| 1.824856136                             | -47.59163775                        | 0.01881338                                             | 73.60449103                                 |
| 2.913088231                             | 15.54378414                         | 0.009946863                                            | 26.07841936                                 |
| 2.865633077                             | 2.766753484                         | 0.035005137                                            | 35.93556453                                 |
| 2.764663516                             | 18.56572937                         | 0.019841894                                            | 20.26652928                                 |
| 3.891525324                             | -34.36386993                        | 0.007362417                                            | 35.63467722                                 |



| log.sigma.3.0.mm.3D_glrIm_LowGrayLevelRunEmphasis | log.sigma.3.0.mm.3D_glrIm_GrayLevelNonUniformityNormalized | log.sigma.3.0.mm.3D_glrIm_RunVariance | log.sigma.3.0.mm.3D_glrIm_GrayLevelNonUniformity |
|---------------------------------------------------|------------------------------------------------------------|---------------------------------------|--------------------------------------------------|
| 0.008385668                                       | 0.050060487                                                | 0.076716491                           | 33.05737091                                      |
| 0.006996253                                       | 0.062295084                                                | 0.210046996                           | 113.5004783                                      |
| 0.022514944                                       | 0.058598839                                                | 0.069777479                           | 23.86311326                                      |
| 0.009282653                                       | 0.04762988                                                 | 0.085353811                           | 116.9255417                                      |
| 0.012649007                                       | 0.047426871                                                | 0.074426295                           | 16.01360052                                      |
| 0.016504892                                       | 0.063078195                                                | 0.091123532                           | 37.46660712                                      |
| 0.01747497                                        | 0.08554825                                                 | 0.109853059                           | 26.32411928                                      |
| 0.008398773                                       | 0.043730098                                                | 0.06543469                            | 41.39266253                                      |
| 0.007985304                                       | 0.044252307                                                | 0.082165326                           | 85.89848648                                      |
| 0.009582151                                       | 0.065922712                                                | 0.121966573                           | 185.3523546                                      |
| 0.00598683                                        | 0.064205443                                                | 0.089133591                           | 49.4082651                                       |
| 0.013521721                                       | 0.05422523                                                 | 0.099460769                           | 73.99264104                                      |
| 0.016041485                                       | 0.060618313                                                | 0.107432109                           | 115.0235247                                      |
| 0.014760332                                       | 0.05610625                                                 | 0.080755068                           | 58.44237621                                      |
| 0.013093585                                       | 0.05730044                                                 | 0.075352117                           | 48.85328507                                      |
| 0.007365535                                       | 0.105935995                                                | 0.461878796                           | 593.0277241                                      |
| 0.013805959                                       | 0.04990866                                                 | 0.072610469                           | 32.69316151                                      |
| 0.025119969                                       | 0.052787069                                                | 0.117319001                           | 112.8015981                                      |
| 0.014214828                                       | 0.044091359                                                | 0.062822189                           | 24.2306876                                       |
| 0.018083452                                       | 0.072320017                                                | 0.228706452                           | 176.4616092                                      |
| 0.006515301                                       | 0.076641219                                                | 0.190384179                           | 352.1370172                                      |
| 0.015256113                                       | 0.054372539                                                | 0.081727963                           | 87.17426898                                      |
| 0.010525517                                       | 0.06381108                                                 | 0.111714908                           | 159.448189                                       |
| 0.006029338                                       | 0.054075484                                                | 0.072474026                           | 24.36911016                                      |
| 0.011784658                                       | 0.072873632                                                | 0.121468383                           | 79.94866523                                      |
| 0.012224447                                       | 0.05121451                                                 | 0.083404452                           | 32.99862681                                      |
| 0.004323202                                       | 0.083088541                                                | 0.311712854                           | 243.051506                                       |
| 0.010135834                                       | 0.063002115                                                | 0.105416952                           | 83.00800881                                      |
| 0.008953587                                       | 0.049951009                                                | 0.079766576                           | 82.8298821                                       |
| 0.009327155                                       | 0.06308339                                                 | 0.241798143                           | 138.8097115                                      |
| 0.007038724                                       | 0.069451061                                                | 0.12866627                            | 200.2649569                                      |
| 0.010368297                                       | 0.063286975                                                | 0.166943107                           | 334.9329141                                      |
| 0.010403724                                       | 0.049298154                                                | 0.085606535                           | 93.18781075                                      |
| 0.015144465                                       | 0.0534205                                                  | 0.040137698                           | 5.359115448                                      |
| 0.017568287                                       | 0.049778929                                                | 0.048881885                           | 15.8302861                                       |
| 0.008643183                                       | 0.052227988                                                | 0.093597527                           | 97.65415569                                      |
| 0.01280572                                        | 0.054903472                                                | 0.113298862                           | 145.0517907                                      |
| 0.013031551                                       | 0.062452634                                                | 0.123356365                           | 190.5948859                                      |
| 0.008820788                                       | 0.061104559                                                | 0.098329804                           | 47.24772193                                      |
| 0.013333019                                       | 0.053067784                                                | 0.09413249                            | 51.55635249                                      |
| 0.013356571                                       | 0.062043871                                                | 0.138238856                           | 82.32089638                                      |
| 0.009220426                                       | 0.04877933                                                 | 0.069714637                           | 43.64440279                                      |
| 0.013196291                                       | 0.05254432                                                 | 0.080245897                           | 80.56675432                                      |
| 0.009309023                                       | 0.045395602                                                | 0.069651794                           | 43.81617559                                      |
| 0.00574997                                        | 0.054811983                                                | 0.080206476                           | 96.21819204                                      |
| 0.044509486                                       | 0.07888431                                                 | 0.154397116                           | 157.4997971                                      |
| 0.006682051                                       | 0.053105192                                                | 0.090918913                           | 210.4086319                                      |
| 0.042724893                                       | 0.053783472                                                | 0.077750319                           | 29.35442443                                      |
| 0.012955219                                       | 0.075949155                                                | 0.054757821                           | 9.683808836                                      |
| 0.011513706                                       | 0.055570439                                                | 0.071833872                           | 25.96104055                                      |
| 0.009980574                                       | 0.061489269                                                | 0.147157271                           | 190.0325148                                      |
| 0.018203147                                       | 0.059770663                                                | 0.097444769                           | 45.78427549                                      |
| 0.006091892                                       | 0.053572297                                                | 0.137781933                           | 185.7248752                                      |
| 0.013858191                                       | 0.064380321                                                | 0.091386664                           | 35.18860079                                      |
| 0.014050983                                       | 0.077601297                                                | 0.275832779                           | 432.9806404                                      |
| 0.021873714                                       | 0.043940872                                                | 0.063494877                           | 36.53152177                                      |
| 0.006270882                                       | 0.041637722                                                | 0.062466966                           | 86.45858775                                      |
| 0.006011884                                       | 0.05254559                                                 | 0.079455983                           | 63.44746797                                      |
| 0.009839769                                       | 0.055741095                                                | 0.11082415                            | 41.57344137                                      |
| 0.008583125                                       | 0.068839789                                                | 0.108572076                           | 55.54992002                                      |
| 0.01550633                                        | 0.052188906                                                | 0.091202672                           | 102.6881025                                      |
| 0.008882373                                       | 0.050892451                                                | 0.126403464                           | 254.3261528                                      |
| 0.007050587                                       | 0.080273309                                                | 0.208295407                           | 217.6176731                                      |
| 0.005718089                                       | 0.079978701                                                | 0.303711094                           | 184.5690334                                      |
| 0.017721085                                       | 0.055208142                                                | 0.055169202                           | 11.39018316                                      |
| 0.007773749                                       | 0.054262556                                                | 0.093306351                           | 78.21661733                                      |
| 0.009215899                                       | 0.056198904                                                | 0.066240022                           | 20.88814787                                      |
| 0.007722273                                       | 0.047367363                                                | 0.106467388                           | 139.7678021                                      |
| 0.024842987                                       | 0.058877117                                                | 0.075930835                           | 24.64848099                                      |
| 0.009922865                                       | 0.052041587                                                | 0.09119128                            | 97.17024393                                      |
| 0.007650152                                       | 0.053006283                                                | 0.108710988                           | 148.1765084                                      |
| 0.013873332                                       | 0.05030157                                                 | 0.086029                              | 52.81216751                                      |
| 0.011583133                                       | 0.065078654                                                | 0.18527748                            | 298.0079949                                      |
| 0.005271995                                       | 0.070173195                                                | 0.202635694                           | 414.6957609                                      |
| 0.003917479                                       | 0.074314299                                                | 0.215140468                           | 595.9542269                                      |
| 0.011098971                                       | 0.044395546                                                | 0.062242298                           | 46.91412888                                      |
| 0.009158396                                       | 0.054079248                                                | 0.080791941                           | 56.33648142                                      |
| 0.035018377                                       | 0.053005495                                                | 0.077013861                           | 30.24677861                                      |
| 0.007541505                                       | 0.050070875                                                | 0.083227395                           | 82.50150834                                      |
| 0.009868623                                       | 0.056746073                                                | 0.097461404                           | 148.8595648                                      |
| 0.009228746                                       | 0.041427826                                                | 0.050501112                           | 19.95262567                                      |
| 0.008351051                                       | 0.041808926                                                | 0.052644148                           | 53.42342723                                      |
| 0.007480373                                       | 0.051453799                                                | 0.101086371                           | 152.6630776                                      |
| 0.013163814                                       | 0.061953769                                                | 0.053106268                           | 8.582873475                                      |
| 0.01089853                                        | 0.059751499                                                | 0.112233484                           | 185.7683279                                      |
| 0.005545391                                       | 0.074757567                                                | 0.190285779                           | 359.1082955                                      |
| 0.018684098                                       | 0.049707795                                                | 0.075046211                           | 36.21910553                                      |
| 0.006087916                                       | 0.045834432                                                | 0.058956707                           | 67.53178841                                      |
| 0.016221922                                       | 0.069268896                                                | 0.085432317                           | 11.75993108                                      |
| 0.019051319                                       | 0.061877441                                                | 0.043234169                           | 6.236749926                                      |
| 0.004666625                                       | 0.055166125                                                | 0.185309378                           | 195.512967                                       |
| 0.01176233                                        | 0.046531051                                                | 0.060331722                           | 31.0619937                                       |
| 0.008144315                                       | 0.063427708                                                | 0.216491047                           | 57.15944076                                      |
| 0.011629117                                       | 0.063710861                                                | 0.168883084                           | 232.7826833                                      |
| 0.015507911                                       | 0.065902158                                                | 0.159662237                           | 342.4243526                                      |
| 0.019141627                                       | 0.039496831                                                | 0.051056528                           | 9.546653257                                      |
| 0.010280553                                       | 0.056639678                                                | 0.085271085                           | 63.9962131                                       |
| 0.038271301                                       | 0.055533658                                                | 0.052300761                           | 6.519324743                                      |
| 0.020955667                                       | 0.067432024                                                | 0.088870734                           | 23.6779906                                       |
| 0.007720605                                       | 0.053221484                                                | 0.100418355                           | 39.63101727                                      |

| log.sigma.3.0.mm.3D_glrIm_LongRunEmphasis | log.sigma.3.0.mm.3D_glrIm_ShortRunHighGrayLevelEmphasis | log.sigma.3.0.mm.3D_glrIm_RunLengthNonUniformity | log.sigma.3.0.mm.3D_glrIm_ShortRunEmphasis |
|-------------------------------------------|---------------------------------------------------------|--------------------------------------------------|--------------------------------------------|
| 1.221755296                               | 272.9713717                                             | 581.3218959                                      | 0.951019428                                |
| 1.514945034                               | 229.37824                                               | 1459.553154                                      | 0.913675398                                |
| 1.207212067                               | 146.2001926                                             | 360.0394971                                      | 0.952702621                                |
| 1.23913903                                | 285.5281137                                             | 2148.678019                                      | 0.948802538                                |
| 1.20924467                                | 294.7332892                                             | 301.2990279                                      | 0.95544948                                 |
| 1.264451678                               | 146.4967732                                             | 510.8114795                                      | 0.942189628                                |
| 1.315082121                               | 133.4936411                                             | 259.420215                                       | 0.933403775                                |
| 1.186639027                               | 316.2423304                                             | 849.7281034                                      | 0.958811536                                |
| 1.230456166                               | 296.2163431                                             | 1706.242518                                      | 0.95060678                                 |
| 1.337840113                               | 195.7247344                                             | 2350.627161                                      | 0.931131957                                |
| 1.247641211                               | 299.3785365                                             | 674.3551221                                      | 0.948611259                                |
| 1.281956184                               | 185.971051                                              | 1168.75695                                       | 0.940227875                                |
| 1.30624508                                | 152.4124459                                             | 1607.250439                                      | 0.935478                                   |
| 1.233962553                               | 175.8514514                                             | 910.3248042                                      | 0.948430497                                |
| 1.218471534                               | 191.0866502                                             | 751.1886547                                      | 0.951515876                                |
| 2.026695055                               | 178.9010861                                             | 3950.962456                                      | 0.863796893                                |
| 1.210417572                               | 224.9117323                                             | 581.1830902                                      | 0.95363054                                 |
| 1.311613591                               | 149.2243125                                             | 1829.49736                                       | 0.939527224                                |
| 1.185925051                               | 257.8529538                                             | 492.2709843                                      | 0.957601103                                |
| 1.554603425                               | 111.7146673                                             | 1931.574152                                      | 0.908599467                                |
| 1.48760746                                | 205.5344132                                             | 3672.522833                                      | 0.913068868                                |
| 1.236330133                               | 182.9395428                                             | 1404.779716                                      | 0.948505862                                |
| 1.309367541                               | 177.7528586                                             | 2121.746181                                      | 0.936645821                                |
| 1.21439449                                | 406.6991124                                             | 397.8435813                                      | 0.951733712                                |
| 1.330023644                               | 148.5015019                                             | 927.1578212                                      | 0.934547794                                |
| 1.245396485                               | 222.228327                                              | 559.1520784                                      | 0.945450202                                |
| 1.724543002                               | 283.094948                                              | 2207.891813                                      | 0.890712323                                |
| 1.292856481                               | 182.229146                                              | 1126.528036                                      | 0.939332566                                |
| 1.216577051                               | 270.9538832                                             | 1480.690325                                      | 0.955763621                                |
| 1.583661378                               | 197.7391047                                             | 1724.447039                                      | 0.90530695                                 |
| 1.347531645                               | 210.7809177                                             | 2415.106316                                      | 0.931362923                                |
| 1.427635616                               | 177.6026842                                             | 4337.912762                                      | 0.922482571                                |
| 1.244411962                               | 230.4989635                                             | 1649.345876                                      | 0.947325603                                |
| 1.116505659                               | 385.5762601                                             | 93.66779502                                      | 0.973508748                                |
| 1.139940835                               | 282.5808688                                             | 293.2926813                                      | 0.968817055                                |
| 1.263348011                               | 238.1118259                                             | 1619.724629                                      | 0.944531524                                |
| 1.3053342                                 | 185.4216693                                             | 2260.321737                                      | 0.939346945                                |
| 1.333718808                               | 166.2053182                                             | 2571.103626                                      | 0.93376588                                 |
| 1.276087727                               | 262.8309268                                             | 672.3552839                                      | 0.944038256                                |
| 1.261174099                               | 204.2606766                                             | 842.5564431                                      | 0.945401388                                |
| 1.377319423                               | 176.4420353                                             | 1095.299313                                      | 0.925612612                                |
| 1.205316271                               | 268.5512183                                             | 792.4857589                                      | 0.953591249                                |
| 1.229826943                               | 226.5663379                                             | 1347.616717                                      | 0.950056329                                |
| 1.198706392                               | 286.6746277                                             | 861.6487328                                      | 0.956368335                                |
| 1.22639698                                | 300.5636279                                             | 1545.830538                                      | 0.951176235                                |
| 1.405935384                               | 70.89242903                                             | 1644.748412                                      | 0.924163508                                |
| 1.25198521                                | 263.2078213                                             | 3454.472822                                      | 0.947204904                                |
| 1.22088494                                | 141.4915186                                             | 482.655074                                       | 0.952444075                                |
| 1.162035413                               | 477.6938519                                             | 115.8368231                                      | 0.962938701                                |
| 1.206987966                               | 339.1732967                                             | 415.2604826                                      | 0.954502325                                |
| 1.37759622                                | 184.7237976                                             | 2577.588914                                      | 0.92976911                                 |
| 1.266780461                               | 175.3113204                                             | 667.2111764                                      | 0.946127969                                |
| 1.356301602                               | 271.3677332                                             | 2919.223545                                      | 0.933207771                                |
| 1.262980714                               | 169.9350743                                             | 472.0151203                                      | 0.943307118                                |
| 1.658729627                               | 137.848278                                              | 4295.573039                                      | 0.897497561                                |
| 1.182609423                               | 241.732492                                              | 748.0436873                                      | 0.959426014                                |
| 1.17984911                                | 373.5916906                                             | 1873.531744                                      | 0.960204146                                |
| 1.229021232                               | 385.1896064                                             | 1059.951916                                      | 0.949753015                                |
| 1.303843046                               | 218.4755916                                             | 635.1391491                                      | 0.938227738                                |
| 1.304191616                               | 195.4524708                                             | 685.847377                                       | 0.936918194                                |
| 1.25212013                                | 182.0755081                                             | 1715.334685                                      | 0.947351582                                |
| 1.331586946                               | 236.34914                                               | 4239.500099                                      | 0.936198206                                |
| 1.522086951                               | 193.203031                                              | 2167.340947                                      | 0.911488317                                |
| 1.715327275                               | 243.1459563                                             | 1748.269758                                      | 0.891264414                                |
| 1.163169034                               | 219.7970707                                             | 187.2304572                                      | 0.962610474                                |
| 1.257796285                               | 266.5209786                                             | 1255.377354                                      | 0.946546653                                |
| 1.192659777                               | 318.2437423                                             | 332.3787894                                      | 0.956810379                                |
| 1.282096344                               | 260.7061568                                             | 2554.664628                                      | 0.944410848                                |
| 1.212672961                               | 170.4379835                                             | 372.5519228                                      | 0.954907474                                |
| 1.253009633                               | 224.6621746                                             | 1628.306125                                      | 0.947289809                                |
| 1.295609565                               | 246.3644011                                             | 2401.421969                                      | 0.940743927                                |
| 1.243488954                               | 199.2155113                                             | 915.9826578                                      | 0.947687008                                |
| 1.467363789                               | 156.3043524                                             | 3716.653637                                      | 0.918224101                                |
| 1.500687783                               | 244.6863376                                             | 4746.009505                                      | 0.914572638                                |
| 1.531686324                               | 318.1047253                                             | 6360.704729                                      | 0.909959074                                |
| 1.178992329                               | 290.8376187                                             | 952.0635633                                      | 0.959963702                                |
| 1.23333072                                | 238.8695466                                             | 913.3388201                                      | 0.948996508                                |
| 1.221267272                               | 141.8632988                                             | 503.2119714                                      | 0.951685862                                |
| 1.232442895                               | 287.626403                                              | 1453.020125                                      | 0.951014379                                |
| 1.276696901                               | 196.1091284                                             | 2251.51316                                       | 0.941128161                                |
| 1.147288639                               | 334.531254                                              | 441.6602497                                      | 0.966574211                                |
| 1.154902583                               | 354.4192979                                             | 1164.387258                                      | 0.964385737                                |
| 1.276148629                               | 283.2819706                                             | 2227.697594                                      | 0.943585698                                |
| 1.1533228                                 | 380.7838277                                             | 127.0910171                                      | 0.966313497                                |
| 1.304413286                               | 173.147341                                              | 2654.795553                                      | 0.938819625                                |
| 1.493310857                               | 237.9697147                                             | 3812.516741                                      | 0.910500912                                |
| 1.216197076                               | 179.5452086                                             | 643.536665                                       | 0.952407891                                |
| 1.169542118                               | 399.0821288                                             | 1334.371878                                      | 0.962083318                                |
| 1.252139447                               | 164.962984                                              | 147.4915864                                      | 0.944469862                                |
| 1.131493599                               | 254.5696693                                             | 93.08197803                                      | 0.968871069                                |
| 1.449241716                               | 338.4165237                                             | 2916.345028                                      | 0.924047747                                |
| 1.180253302                               | 236.893133                                              | 598.6555994                                      | 0.958274612                                |
| 1.509845008                               | 217.7949619                                             | 732.0475689                                      | 0.918851173                                |
| 1.426696249                               | 173.4578796                                             | 3003.062802                                      | 0.923643587                                |
| 1.412764419                               | 135.3940905                                             | 4272.086186                                      | 0.923880711                                |
| 1.148662275                               | 368.8697571                                             | 221.5504708                                      | 0.966300708                                |
| 1.245164409                               | 269.3167751                                             | 982.8036596                                      | 0.946493644                                |
| 1.152602084                               | 272.7121039                                             | 107.3503594                                      | 0.965308038                                |
| 1.258037757                               | 161.1544342                                             | 303.9797883                                      | 0.943996494                                |
| 1.27776194                                | 316.4131239                                             | 642.098076                                       | 0.942606714                                |

| log.sigma.3.0.mm.3D_glrIm_LongRunHighGrayLevelEmphasis | log.sigma.3.0.mm.3D_glrIm_RunPercentage | log.sigma.3.0.mm.3D_glrIm_LongRunLowGrayLevelEmphasis | log.sigma.3.0.mm.3D_glrIm_RunEntropy |
|--------------------------------------------------------|-----------------------------------------|-------------------------------------------------------|--------------------------------------|
| 334.0511565                                            | 0.935280017                             | 0.010019781                                           | 4.826242796                          |
| 364.3042726                                            | 0.876856413                             | 0.00987402                                            | 4.806054381                          |
| 173.4103387                                            | 0.938819745                             | 0.027977245                                           | 4.568696165                          |
| 369.8704384                                            | 0.931630419                             | 0.010843743                                           | 4.917428626                          |
| 374.3995062                                            | 0.940218556                             | 0.01393517                                            | 4.875367536                          |
| 186.4421766                                            | 0.923794712                             | 0.020974733                                           | 4.494995644                          |
| 183.7492715                                            | 0.912805296                             | 0.022303732                                           | 4.243775212                          |
| 379.9988655                                            | 0.944649163                             | 0.009973646                                           | 4.96654479                           |
| 374.3294292                                            | 0.933658934                             | 0.009600867                                           | 5.006758707                          |
| 263.6980354                                            | 0.907533396                             | 0.012537074                                           | 4.652918889                          |
| 394.0068267                                            | 0.930425077                             | 0.007130083                                           | 4.472831361                          |
| 236.6751169                                            | 0.920637392                             | 0.017154454                                           | 4.795296303                          |
| 205.9959059                                            | 0.914843113                             | 0.020293683                                           | 4.66768078                           |
| 224.7650131                                            | 0.931677446                             | 0.018340832                                           | 4.636813048                          |
| 241.5924782                                            | 0.935827071                             | 0.015263907                                           | 4.632491792                          |
| 389.3142641                                            | 0.803700546                             | 0.013780396                                           | 4.566042819                          |
| 280.4727189                                            | 0.93850562                              | 0.016741249                                           | 4.767199142                          |
| 192.4550294                                            | 0.916347803                             | 0.033618809                                           | 4.824476705                          |
| 311.9215024                                            | 0.944356331                             | 0.017283207                                           | 4.901631426                          |
| 177.3169379                                            | 0.870705517                             | 0.027417176                                           | 4.574417637                          |
| 317.1268577                                            | 0.879329132                             | 0.009458332                                           | 4.543289086                          |
| 230.2611456                                            | 0.932110912                             | 0.01887087                                            | 4.734364936                          |
| 231.5475943                                            | 0.914936766                             | 0.013981666                                           | 4.63704358                           |
| 523.032525                                             | 0.936830321                             | 0.006769316                                           | 4.718291427                          |
| 194.547369                                             | 0.911001789                             | 0.015642723                                           | 4.44550772                           |
| 277.0408756                                            | 0.928397251                             | 0.015033908                                           | 4.833644461                          |
| 523.3473987                                            | 0.843268676                             | 0.007044663                                           | 4.621955816                          |
| 232.2959183                                            | 0.919211981                             | 0.013217003                                           | 4.606215855                          |
| 348.9803061                                            | 0.939463935                             | 0.010635772                                           | 4.774977611                          |
| 336.389207                                             | 0.865127398                             | 0.013182859                                           | 4.837471518                          |
| 283.6320145                                            | 0.906985748                             | 0.009629628                                           | 4.54936903                           |
| 255.9979001                                            | 0.89229472                              | 0.014648413                                           | 4.723106313                          |
| 300.8160197                                            | 0.929811949                             | 0.012609868                                           | 4.856615795                          |
| 448.2455544                                            | 0.964497041                             | 0.015557236                                           | 4.56662686                           |
| 329.0848617                                            | 0.957831325                             | 0.019712579                                           | 4.72737186                           |
| 315.8881197                                            | 0.925590251                             | 0.010834198                                           | 4.768494238                          |
| 242.1506322                                            | 0.917254274                             | 0.016447886                                           | 4.804169749                          |
| 232.0956438                                            | 0.909843585                             | 0.016517486                                           | 4.618596369                          |
| 356.9451127                                            | 0.925380009                             | 0.010495552                                           | 4.678890535                          |
| 262.9474099                                            | 0.926083449                             | 0.016268607                                           | 4.772720478                          |
| 252.5198223                                            | 0.899958251                             | 0.017933237                                           | 4.712281404                          |
| 332.3337883                                            | 0.938816692                             | 0.010922877                                           | 4.849571566                          |
| 295.4687174                                            | 0.933804928                             | 0.015477457                                           | 4.736549995                          |
| 351.1257514                                            | 0.941688555                             | 0.011235348                                           | 4.913279565                          |
| 386.6002121                                            | 0.934750553                             | 0.006822341                                           | 4.705877757                          |
| 95.38729376                                            | 0.895905262                             | 0.066327085                                           | 4.334017747                          |
| 340.5404009                                            | 0.928720834                             | 0.008168607                                           | 4.785659932                          |
| 173.4576229                                            | 0.936139332                             | 0.055063731                                           | 4.636934474                          |
| 581.1216109                                            | 0.951205511                             | 0.013337052                                           | 4.429685162                          |
| 427.5081702                                            | 0.939637827                             | 0.013426007                                           | 4.829724685                          |
| 259.8056897                                            | 0.902498203                             | 0.013288848                                           | 4.700761277                          |
| 231.2446351                                            | 0.926146405                             | 0.023618465                                           | 4.546291716                          |
| 379.0499124                                            | 0.907233306                             | 0.008056719                                           | 4.872235602                          |
| 221.8733601                                            | 0.92476897                              | 0.016898885                                           | 4.504901015                          |
| 238.6965012                                            | 0.853689312                             | 0.021683886                                           | 4.684910372                          |
| 288.7095158                                            | 0.945830052                             | 0.025204807                                           | 4.92034626                           |
| 454.4484078                                            | 0.946858887                             | 0.007317988                                           | 5.014742059                          |
| 504.3148081                                            | 0.933666488                             | 0.006866406                                           | 4.861164216                          |
| 290.0019823                                            | 0.916178416                             | 0.01222956                                            | 4.738355307                          |
| 264.2562294                                            | 0.915917227                             | 0.010926996                                           | 4.419269044                          |
| 225.6894381                                            | 0.928522162                             | 0.019766933                                           | 4.807031361                          |
| 325.8558527                                            | 0.912152105                             | 0.011398097                                           | 4.940943126                          |
| 310.0947751                                            | 0.87635051                              | 0.01033797                                            | 4.485424021                          |
| 458.2990965                                            | 0.844238515                             | 0.008830739                                           | 4.623691628                          |
| 259.8244863                                            | 0.950726693                             | 0.0202279                                             | 4.543162207                          |
| 346.3913178                                            | 0.927831988                             | 0.009347522                                           | 4.838461352                          |
| 393.8362855                                            | 0.943186255                             | 0.010543189                                           | 4.717701155                          |
| 337.482804                                             | 0.922956618                             | 0.010102199                                           | 4.926449051                          |
| 206.3021678                                            | 0.938599517                             | 0.03032987                                            | 4.548490033                          |
| 283.2823701                                            | 0.928393834                             | 0.012194874                                           | 4.814498616                          |
| 320.698853                                             | 0.919534413                             | 0.010077748                                           | 4.816205044                          |
| 252.7356387                                            | 0.929958438                             | 0.017321594                                           | 4.804529122                          |
| 232.5812654                                            | 0.885672184                             | 0.016662808                                           | 4.697275996                          |
| 383.1966527                                            | 0.879644477                             | 0.007839961                                           | 4.615558215                          |
| 522.7356389                                            | 0.873135579                             | 0.005723457                                           | 4.710574895                          |
| 356.032369                                             | 0.946856907                             | 0.012810459                                           | 4.924681106                          |
| 304.2697749                                            | 0.932649267                             | 0.010954186                                           | 4.731086408                          |
| 167.9130674                                            | 0.935435057                             | 0.044383108                                           | 4.706622528                          |
| 363.7538829                                            | 0.934109541                             | 0.009183056                                           | 4.808167633                          |
| 256.8725233                                            | 0.921725499                             | 0.012526392                                           | 4.708277304                          |
| 382.5723933                                            | 0.955586081                             | 0.010427704                                           | 4.944824252                          |
| 422.6892752                                            | 0.952905409                             | 0.009323711                                           | 4.986635481                          |
| 377.9635742                                            | 0.923352436                             | 0.009266742                                           | 4.87848767                           |
| 456.2604904                                            | 0.954907162                             | 0.013668218                                           | 4.461190015                          |
| 230.7880234                                            | 0.916906744                             | 0.014459966                                           | 4.645907019                          |
| 370.6314226                                            | 0.877156262                             | 0.008095114                                           | 4.624119553                          |
| 213.8059394                                            | 0.936523631                             | 0.023502146                                           | 4.782670069                          |
| 486.3283059                                            | 0.949296193                             | 0.006962624                                           | 4.902958032                          |
| 217.4391788                                            | 0.927700715                             | 0.01841021                                            | 4.264876514                          |
| 300.2946028                                            | 0.95970696                              | 0.019810898                                           | 4.368160078                          |
| 513.72252                                              | 0.891185293                             | 0.006331351                                           | 4.941345579                          |
| 274.9237446                                            | 0.9455219                               | 0.014015394                                           | 4.871692783                          |
| 348.2464757                                            | 0.881228361                             | 0.0109956                                             | 4.691495163                          |
| 261.3756009                                            | 0.893191649                             | 0.015454971                                           | 4.700410591                          |
| 196.4630154                                            | 0.894817033                             | 0.021392907                                           | 4.618284735                          |
| 440.5151134                                            | 0.955305564                             | 0.020572122                                           | 5.028876442                          |
| 356.502692                                             | 0.929086538                             | 0.011745271                                           | 4.7305749                            |
| 318.1587936                                            | 0.954346467                             | 0.051379908                                           | 4.487342428                          |
| 212.5203951                                            | 0.926324335                             | 0.025981741                                           | 4.47868015                           |
| 406.9212515                                            | 0.922695644                             | 0.009375805                                           | 4.889303692                          |

| log.sigma.3.0.mm.3D_glrIm_HighGrayLevelRunEmphasis | log.sigma.3.0.mm.3D_glrIm_RunLengthNonUniformityNormalized | log.sigma.3.0.mm.3D_glszm_GrayLevelVariance |
|----------------------------------------------------|------------------------------------------------------------|---------------------------------------------|
| 284.0768361                                        | 0.879591562                                                | 39.24998859                                 |
| 248.6018952                                        | 0.800121602                                                | 33.15313636                                 |
| 151.3657848                                        | 0.883350033                                                | 27.42533948                                 |
| 300.4564075                                        | 0.874574113                                                | 37.48357284                                 |
| 308.6028483                                        | 0.891015571                                                | 48.38637899                                 |
| 153.8047266                                        | 0.859361259                                                | 19.74305731                                 |
| 142.1849567                                        | 0.841346788                                                | 18.87422802                                 |
| 327.7813468                                        | 0.897450312                                                | 44.72011863                                 |
| 310.1553568                                        | 0.878549027                                                | 44.30780878                                 |
| 207.4027353                                        | 0.835412523                                                | 28.6648734                                  |
| 315.4488813                                        | 0.875032582                                                | 22.87493062                                 |
| 195.0855535                                        | 0.855559576                                                | 34.66858583                                 |
| 161.7400427                                        | 0.84550938                                                 | 28.37120929                                 |
| 184.6679986                                        | 0.873462387                                                | 25.06499619                                 |
| 200.3339532                                        | 0.880562591                                                | 28.82462324                                 |
| 203.9374939                                        | 0.704627172                                                | 27.04622697                                 |
| 235.1269933                                        | 0.886112242                                                | 31.13878879                                 |
| 156.401762                                         | 0.854865859                                                | 31.66191542                                 |
| 267.7882835                                        | 0.89484783                                                 | 38.88460682                                 |
| 121.0792661                                        | 0.790022313                                                | 20.31889446                                 |
| 222.4526172                                        | 0.798288959                                                | 23.7565581                                  |
| 191.4231576                                        | 0.874709033                                                | 31.01049948                                 |
| 187.0834986                                        | 0.847955172                                                | 25.01301394                                 |
| 427.8705393                                        | 0.881696625                                                | 36.8013434                                  |
| 156.3035802                                        | 0.843906493                                                | 21.96989125                                 |
| 232.2053039                                        | 0.867008545                                                | 37.46063609                                 |
| 314.5405859                                        | 0.75401199                                                 | 27.59404237                                 |
| 190.8970065                                        | 0.853805179                                                | 27.36025968                                 |
| 283.9834581                                        | 0.891580376                                                | 34.49098354                                 |
| 216.5766311                                        | 0.782862126                                                | 34.24376119                                 |
| 223.0347709                                        | 0.836469142                                                | 21.80908479                                 |
| 189.8631323                                        | 0.818238782                                                | 25.43964847                                 |
| 242.9576948                                        | 0.87157233                                                 | 36.5786489                                  |
| 397.0258802                                        | 0.933116716                                                | 41.62109375                                 |
| 290.9393679                                        | 0.921746285                                                | 40.62033951                                 |
| 251.6973852                                        | 0.865294793                                                | 28.74056877                                 |
| 194.8641765                                        | 0.854337411                                                | 33.87103886                                 |
| 177.2458897                                        | 0.841640582                                                | 23.98065286                                 |
| 278.4967502                                        | 0.866526591                                                | 32.72737967                                 |
| 214.3689559                                        | 0.866880522                                                | 31.49974208                                 |
| 188.9947088                                        | 0.824231196                                                | 27.68872247                                 |
| 280.3667909                                        | 0.885282624                                                | 37.49153919                                 |
| 238.7996571                                        | 0.877758853                                                | 31.13424347                                 |
| 298.2600049                                        | 0.892032905                                                | 38.14235165                                 |
| 315.6567612                                        | 0.879914498                                                | 30.16876011                                 |
| 74.93776242                                        | 0.821983164                                                | 15.00983472                                 |
| 276.7375789                                        | 0.871197359                                                | 32.70855583                                 |
| 147.240372                                         | 0.883459707                                                | 27.45210922                                 |
| 496.730639                                         | 0.907796214                                                | 53.96123858                                 |
| 354.9398386                                        | 0.888076511                                                | 48.12094942                                 |
| 196.5691421                                        | 0.833190667                                                | 28.0192522                                  |
| 184.567839                                         | 0.869735745                                                | 24.15020006                                 |
| 288.4038605                                        | 0.840907675                                                | 34.76524364                                 |
| 179.1967426                                        | 0.862616859                                                | 22.72326456                                 |
| 151.5927531                                        | 0.768543957                                                | 25.4321477                                  |
| 250.1329555                                        | 0.899153806                                                | 41.23552731                                 |
| 388.2429289                                        | 0.901344376                                                | 45.43856229                                 |
| 406.6386224                                        | 0.876960291                                                | 43.44898559                                 |
| 230.6180697                                        | 0.851062681                                                | 29.72430663                                 |
| 207.4959472                                        | 0.848591086                                                | 18.76295521                                 |
| 189.7820976                                        | 0.871367781                                                | 33.51623458                                 |
| 250.9298689                                        | 0.847282429                                                | 40.08225468                                 |
| 210.3085951                                        | 0.796968479                                                | 20.99469578                                 |
| 271.3128255                                        | 0.756019996                                                | 25.85498071                                 |
| 227.2371001                                        | 0.906738116                                                | 28.58530427                                 |
| 280.3233582                                        | 0.870074598                                                | 41.68038584                                 |
| 331.8350169                                        | 0.893336501                                                | 38.59545949                                 |
| 273.5087774                                        | 0.865141903                                                | 35.23405574                                 |
| 177.0222365                                        | 0.889196631                                                | 25.04739135                                 |
| 234.9448407                                        | 0.87147466                                                 | 34.75303336                                 |
| 259.1130196                                        | 0.857493513                                                | 31.46212404                                 |
| 208.6639211                                        | 0.871938494                                                | 32.98931973                                 |
| 167.6952538                                        | 0.809816991                                                | 26.59055948                                 |
| 264.7414557                                        | 0.801769537                                                | 22.0372336                                  |
| 347.9441802                                        | 0.792201992                                                | 33.7070842                                  |
| 302.7251957                                        | 0.90032251                                                 | 43.98858935                                 |
| 250.6244857                                        | 0.875467244                                                | 32.14813658                                 |
| 146.5975535                                        | 0.881252345                                                | 32.74621377                                 |
| 301.0511702                                        | 0.88046479                                                 | 32.11627206                                 |
| 206.9927465                                        | 0.857432175                                                | 27.39740945                                 |
| 343.5358506                                        | 0.916248424                                                | 47.13795418                                 |
| 367.1889565                                        | 0.910705877                                                | 46.81080886                                 |
| 299.4624863                                        | 0.863253062                                                | 36.07358174                                 |
| 394.4068814                                        | 0.916437111                                                | 40.31693639                                 |
| 182.798757                                         | 0.852787611                                                | 22.95509211                                 |
| 258.6100809                                        | 0.792691486                                                | 27.6106252                                  |
| 185.9322656                                        | 0.882760317                                                | 32.54034255                                 |
| 414.8640998                                        | 0.905253387                                                | 42.046968                                   |
| 174.3421456                                        | 0.866589248                                                | 21.33159763                                 |
| 263.3942148                                        | 0.92237297                                                 | 30.18083333                                 |
| 363.8339155                                        | 0.821795883                                                | 38.94809968                                 |
| 244.1511435                                        | 0.896157743                                                | 42.77033798                                 |
| 235.7758099                                        | 0.811375621                                                | 26.54015281                                 |
| 186.5308873                                        | 0.820634307                                                | 27.48931739                                 |
| 144.9293539                                        | 0.82090329                                                 | 23.24267187                                 |
| 381.9571869                                        | 0.915738762                                                | 76.07530612                                 |
| 284.9637405                                        | 0.869271188                                                | 33.18235798                                 |
| 280.9161434                                        | 0.913419435                                                | 34.09375                                    |
| 170.2207491                                        | 0.86431847                                                 | 21.14342247                                 |
| 332.0281162                                        | 0.861185311                                                | 54.31118862                                 |

| log.sigma.3.0.mm.3D_glszm_SmallAreaHighGrayLevelEmphasis | log.sigma.3.0.mm.3D_glszm_GrayLevelNonUniformityNormalized | log.sigma.3.0.mm.3D_glszm_SizeZoneNonUniformityNormalized |
|----------------------------------------------------------|------------------------------------------------------------|-----------------------------------------------------------|
| 244.448623                                               | 0.045676589                                                | 0.426383309                                               |
| 199.5701789                                              | 0.048065269                                                | 0.345058583                                               |
| 131.9080725                                              | 0.055064547                                                | 0.412198201                                               |
| 183.9527707                                              | 0.045209921                                                | 0.334389322                                               |
| 148.8885327                                              | 0.042205306                                                | 0.291473357                                               |
| 105.0083004                                              | 0.064255008                                                | 0.276096955                                               |
| 88.90895844                                              | 0.068326635                                                | 0.261052838                                               |
| 244.9774977                                              | 0.042137516                                                | 0.388692116                                               |
| 215.6556777                                              | 0.041782934                                                | 0.352408854                                               |
| 169.7928585                                              | 0.05207076                                                 | 0.346111689                                               |
| 173.5255969                                              | 0.059812709                                                | 0.285483166                                               |
| 159.7521162                                              | 0.047178859                                                | 0.380940647                                               |
| 97.98816294                                              | 0.052511648                                                | 0.252383544                                               |
| 119.8881777                                              | 0.055107453                                                | 0.312031702                                               |
| 125.4822607                                              | 0.05158855                                                 | 0.331765278                                               |
| 161.3456449                                              | 0.055424734                                                | 0.340489944                                               |
| 153.5392241                                              | 0.05033557                                                 | 0.343678213                                               |
| 130.6308018                                              | 0.049531531                                                | 0.350704046                                               |
| 192.4896806                                              | 0.045862107                                                | 0.384272667                                               |
| 105.3535141                                              | 0.061777934                                                | 0.325486646                                               |
| 173.2646478                                              | 0.058125335                                                | 0.334977351                                               |
| 134.5271243                                              | 0.050182102                                                | 0.318324662                                               |
| 152.3300116                                              | 0.056157845                                                | 0.34164225                                                |
| 264.0345604                                              | 0.04936744                                                 | 0.382086311                                               |
| 140.5594761                                              | 0.060247098                                                | 0.381213703                                               |
| 193.2379565                                              | 0.045476466                                                | 0.377290702                                               |
| 238.9369876                                              | 0.053788869                                                | 0.350309197                                               |
| 163.1426227                                              | 0.053478369                                                | 0.370480469                                               |
| 168.2718184                                              | 0.04714731                                                 | 0.363282652                                               |
| 179.7605653                                              | 0.048245937                                                | 0.354376275                                               |
| 177.610184                                               | 0.06076141                                                 | 0.341297434                                               |
| 140.3321003                                              | 0.055032387                                                | 0.305598543                                               |
| 159.7265413                                              | 0.045395421                                                | 0.325084547                                               |
| 261.6843533                                              | 0.049804688                                                | 0.451171875                                               |
| 216.8448945                                              | 0.045925926                                                | 0.451049383                                               |
| 149.393231                                               | 0.051262976                                                | 0.28841263                                                |
| 162.1764612                                              | 0.04784245                                                 | 0.36919362                                                |
| 123.9478455                                              | 0.056245035                                                | 0.328197811                                               |
| 160.3067572                                              | 0.05105164                                                 | 0.296757399                                               |
| 155.0425954                                              | 0.050602655                                                | 0.346691756                                               |
| 143.2464779                                              | 0.053143659                                                | 0.347423258                                               |
| 182.2237185                                              | 0.045600188                                                | 0.318985591                                               |
| 139.214624                                               | 0.049451961                                                | 0.3239878                                                 |
| 227.3578997                                              | 0.04535813                                                 | 0.382711911                                               |
| 196.0320942                                              | 0.050395287                                                | 0.32350203                                                |
| 64.86163377                                              | 0.071921394                                                | 0.31782807                                                |
| 185.0712643                                              | 0.047727542                                                | 0.341243622                                               |
| 113.0316642                                              | 0.053765859                                                | 0.35327299                                                |
| 319.6170689                                              | 0.047003787                                                | 0.43773669                                                |
| 242.8203689                                              | 0.043220268                                                | 0.408719805                                               |
| 149.5199158                                              | 0.052399916                                                | 0.328333036                                               |
| 108.0765667                                              | 0.058393352                                                | 0.325109264                                               |
| 206.8853497                                              | 0.047633648                                                | 0.343987437                                               |
| 107.5456005                                              | 0.05967021                                                 | 0.27986667                                                |
| 121.2156105                                              | 0.056083004                                                | 0.338323655                                               |
| 187.4837788                                              | 0.04355868                                                 | 0.411162791                                               |
| 272.8243545                                              | 0.041036368                                                | 0.389968043                                               |
| 243.61318                                                | 0.043144464                                                | 0.356712262                                               |
| 166.158186                                               | 0.052382672                                                | 0.367540682                                               |
| 125.50258                                                | 0.066912465                                                | 0.295911512                                               |
| 160.5723116                                              | 0.047985917                                                | 0.363079405                                               |
| 183.9109769                                              | 0.045762679                                                | 0.355798337                                               |
| 139.435262                                               | 0.062000902                                                | 0.294275619                                               |
| 188.5526821                                              | 0.054825248                                                | 0.343236682                                               |
| 171.8342973                                              | 0.0568134                                                  | 0.417894117                                               |
| 204.7283961                                              | 0.044171887                                                | 0.353906879                                               |
| 232.131498                                               | 0.046371211                                                | 0.358833474                                               |
| 208.9246604                                              | 0.046306226                                                | 0.361327738                                               |
| 129.3411875                                              | 0.057661838                                                | 0.369737438                                               |
| 184.5378121                                              | 0.047293929                                                | 0.363835311                                               |
| 194.9302072                                              | 0.048628816                                                | 0.345561311                                               |
| 151.7919303                                              | 0.048843537                                                | 0.32638322                                                |
| 137.1255337                                              | 0.053561079                                                | 0.32569625                                                |
| 207.8097923                                              | 0.059663848                                                | 0.345961289                                               |
| 234.4301858                                              | 0.049134538                                                | 0.33484573                                                |
| 204.147361                                               | 0.041733163                                                | 0.350447995                                               |
| 153.7138814                                              | 0.049843616                                                | 0.304999435                                               |
| 128.7139008                                              | 0.051015306                                                | 0.377913259                                               |
| 204.8696261                                              | 0.048828561                                                | 0.352572696                                               |
| 142.139009                                               | 0.052692582                                                | 0.322579329                                               |
| 287.7224034                                              | 0.041096237                                                | 0.470650068                                               |
| 251.1583304                                              | 0.040410204                                                | 0.41632373                                                |
| 196.5908743                                              | 0.0465907                                                  | 0.363419409                                               |
| 235.8613959                                              | 0.052395449                                                | 0.400096138                                               |
| 126.0774729                                              | 0.057856375                                                | 0.304747258                                               |
| 193.1175087                                              | 0.054712577                                                | 0.331076696                                               |
| 146.1722721                                              | 0.049782807                                                | 0.365797897                                               |
| 255.8417823                                              | 0.043785383                                                | 0.385082651                                               |
| 94.64490084                                              | 0.070769231                                                | 0.312189349                                               |
| 162.6825231                                              | 0.057222222                                                | 0.408333333                                               |
| 249.604393                                               | 0.044981162                                                | 0.333387534                                               |
| 215.1910649                                              | 0.043971955                                                | 0.391651425                                               |
| 145.9630834                                              | 0.053970392                                                | 0.311019462                                               |
| 132.9827194                                              | 0.053033489                                                | 0.307393785                                               |
| 109.5373619                                              | 0.057458586                                                | 0.314775676                                               |
| 277.1436292                                              | 0.035714286                                                | 0.462244898                                               |
| 138.0936444                                              | 0.048293237                                                | 0.299917636                                               |
| 191.5183185                                              | 0.053710938                                                | 0.375                                                     |
| 93.02433927                                              | 0.064729493                                                | 0.269150319                                               |
| 311.5289445                                              | 0.039436651                                                | 0.427445613                                               |

| log.sigma.3.0.mm.3D_glszm_SizeZoneNonUniformity | log.sigma.3.0.mm.3D_glszm_GrayLevelNonUniformity | log.sigma.3.0.mm.3D_glszm_LargeAreaEmphasis | log.sigma.3.0.mm.3D_glszm_ZoneVariance |
|-------------------------------------------------|--------------------------------------------------|---------------------------------------------|----------------------------------------|
| 126.2094595                                     | 13.52027027                                      | 18.95945946                                 | 13.27058985                            |
| 191.1624549                                     | 26.62815884                                      | 175.0523466                                 | 160.9966147                            |
| 81.20304569                                     | 10.84771574                                      | 12.07106599                                 | 7.217655698                            |
| 351.7775665                                     | 47.5608365                                       | 17.9230038                                  | 11.64921695                            |
| 43.4295302                                      | 6.288590604                                      | 10.66442953                                 | 4.859240575                            |
| 62.67400881                                     | 14.58590308                                      | 18.27753304                                 | 10.25391527                            |
| 26.36633663                                     | 6.900990099                                      | 31.23762376                                 | 20.10449956                            |
| 179.575576                                      | 19.46753247                                      | 10.6969697                                  | 5.993141058                            |
| 297.0806643                                     | 35.22301305                                      | 20.50652432                                 | 14.42442049                            |
| 321.883871                                      | 48.42580645                                      | 90.7655914                                  | 79.66881258                            |
| 83.07560137                                     | 17.40549828                                      | 20.6838488                                  | 12.60731451                            |
| 208.7554745                                     | 25.8540146                                       | 29.85036496                                 | 22.53669615                            |
| 149.9158249                                     | 31.19191919                                      | 38.50505051                                 | 26.31390221                            |
| 126.3728395                                     | 22.31851852                                      | 21.79259259                                 | 14.17226642                            |
| 124.0802139                                     | 19.29411765                                      | 16.34491979                                 | 10.41165747                            |
| 371.8150183                                     | 60.52380952                                      | 3666.892857                                 | 3626.421355                            |
| 102.4161074                                     | 15                                               | 12.47651007                                 | 6.990225666                            |
| 270.7435233                                     | 38.23834197                                      | 50.3238342                                  | 41.19905232                            |
| 102.9850746                                     | 12.29104478                                      | 9.723880597                                 | 5.007852528                            |
| 198.8723404                                     | 37.74631751                                      | 230.3649755                                 | 209.3492785                            |
| 435.8055342                                     | 75.62106072                                      | 325.1099154                                 | 308.9866968                            |
| 197.3612903                                     | 31.11290323                                      | 24.56774194                                 | 16.87159209                            |
| 314.3108696                                     | 51.66521739                                      | 47.55978261                                 | 38.74791942                            |
| 76.03517588                                     | 9.824120603                                      | 15.63316583                                 | 9.790863867                            |
| 156.6788321                                     | 24.76155718                                      | 52.51581509                                 | 43.93419409                            |
| 108.6597222                                     | 13.09722222                                      | 16.68055556                                 | 10.87379437                            |
| 264.4834437                                     | 40.61059603                                      | 529.7615894                                 | 508.6868015                            |
| 193.3908046                                     | 27.91570881                                      | 29.39655172                                 | 21.86036978                            |
| 273.9151194                                     | 35.54907162                                      | 14.59814324                                 | 9.118570102                            |
| 237.077728                                      | 32.27653214                                      | 203.9192825                                 | 189.4815545                            |
| 336.5192698                                     | 59.91075051                                      | 105.3194726                                 | 94.92440722                            |
| 516.4615385                                     | 93.00473373                                      | 88.27455621                                 | 75.96234726                            |
| 241.8629032                                     | 33.77419355                                      | 23.43145161                                 | 15.96474845                            |
| 28.875                                          | 3.1875                                           | 3.5625                                      | 0.921875                               |
| 81.18888889                                     | 8.266666667                                      | 6.166666667                                 | 2.764691358                            |
| 196.1205882                                     | 34.85882353                                      | 23.52058824                                 | 14.69619377                            |
| 366.6092649                                     | 47.50755287                                      | 44.49144008                                 | 36.07968772                            |
| 330.166998                                      | 56.58250497                                      | 83.55666004                                 | 72.44113055                            |
| 89.91749175                                     | 15.46864686                                      | 21.44224422                                 | 13.84794519                            |
| 128.6226415                                     | 18.77358491                                      | 26.98921833                                 | 18.99450019                            |
| 158.7724289                                     | 24.28665208                                      | 56.69584245                                 | 46.29274739                            |
| 126.6372796                                     | 18.10327456                                      | 11.38790932                                 | 5.62549093                             |
| 203.1403509                                     | 31.00637959                                      | 17.74162679                                 | 10.88340977                            |
| 174.8993435                                     | 20.72866521                                      | 12.92122538                                 | 7.890676996                            |
| 234.2154696                                     | 36.48618785                                      | 21.56629834                                 | 14.83786362                            |
| 184.0224525                                     | 41.64248705                                      | 127.9723661                                 | 113.1651558                            |
| 542.5773585                                     | 75.88679245                                      | 29.90566038                                 | 22.70707013                            |
| 81.60606061                                     | 12.41991342                                      | 15.84848485                                 | 9.478870336                            |
| 29.32835821                                     | 3.149253731                                      | 11.43283582                                 | 7.432835821                            |
| 89.10091743                                     | 9.422018349                                      | 14.24311927                                 | 9.04555593                             |
| 345.0780209                                     | 55.07231208                                      | 72.09705043                                 | 61.48346598                            |
| 92.65614035                                     | 16.64210526                                      | 33.52631579                                 | 25.10613727                            |
| 428.6083467                                     | 59.35152488                                      | 64.98956661                                 | 55.58545033                            |
| 55.69346734                                     | 11.87437186                                      | 23.69346734                                 | 14.87346279                            |
| 453.6920209                                     | 75.20730798                                      | 956.8553318                                 | 933.1941082                            |
| 176.8                                           | 18.73023256                                      | 9.095348837                                 | 4.916652244                            |
| 400.1072125                                     | 42.10331384                                      | 10.30116959                                 | 5.732575835                            |
| 194.0514706                                     | 23.47058824                                      | 20.14889706                                 | 14.49953706                            |
| 107.6894198                                     | 15.34812287                                      | 28.3890785                                  | 20.6709222                             |
| 74.86561265                                     | 16.92885375                                      | 46.4229249                                  | 34.29711447                            |
| 279.2080624                                     | 36.90117035                                      | 41.07542263                                 | 33.48249546                            |
| 666.0544872                                     | 85.66773504                                      | 55.3482906                                  | 46.78516395                            |
| 203.6387283                                     | 42.90462428                                      | 277.5578035                                 | 257.6187393                            |
| 189.123412                                      | 30.20871143                                      | 602.1288566                                 | 577.5625311                            |
| 45.55045872                                     | 6.19266055                                       | 7.587155963                                 | 3.623769043                            |
| 209.8667791                                     | 26.19392917                                      | 33.91062395                                 | 27.05205475                            |
| 65.30769231                                     | 8.43956044                                       | 9.582417582                                 | 4.895906292                            |
| 410.4683099                                     | 52.60387324                                      | 33.65052817                                 | 25.73046565                            |
| 69.5106383                                      | 10.84042553                                      | 16.28723404                                 | 10.65923495                            |
| 285.9745547                                     | 37.17302799                                      | 25.14885496                                 | 18.60280902                            |
| 381.8452489                                     | 53.73484163                                      | 29.83891403                                 | 22.27019103                            |
| 137.0809524                                     | 20.51428571                                      | 20.24047619                                 | 13.01462018                            |
| 445.226774                                      | 73.21799561                                      | 181.6503292                                 | 167.3578364                            |
| 561.841133                                      | 96.89408867                                      | 192.570197                                  | 175.4681016                            |
| 788.2268479                                     | 115.6627018                                      | 726.5624469                                 | 711.3544349                            |
| 176.9762376                                     | 21.07524752                                      | 10.22970297                                 | 5.346040584                            |
| 131.4547564                                     | 21.48259861                                      | 15.84918794                                 | 9.132552043                            |
| 94.10040161                                     | 12.70281124                                      | 18.30522088                                 | 12.30370478                            |
| 249.6214689                                     | 34.57062147                                      | 17.5819209                                  | 11.37422197                            |
| 319.3535354                                     | 52.16565657                                      | 34.52525253                                 | 26.26107948                            |
| 132.252669                                      | 11.5480427                                       | 5.914590747                                 | 2.697610213                            |
| 294.3408769                                     | 28.57001414                                      | 6.352192362                                 | 2.754543872                            |
| 387.7685098                                     | 49.71227741                                      | 32.83598875                                 | 25.98896256                            |
| 31.60759494                                     | 4.139240506                                      | 5.405063291                                 | 2.036212145                            |
| 317.8513902                                     | 60.34419942                                      | 40.83509108                                 | 30.26479962                            |
| 420.1363278                                     | 69.43026005                                      | 383.9779354                                 | 365.3569082                            |
| 118.5185185                                     | 16.12962963                                      | 16.87037037                                 | 11.10444292                            |
| 289.1970706                                     | 32.8828229                                       | 8.021304927                                 | 3.750560726                            |
| 20.29230769                                     | 4.6                                              | 16.66153846                                 | 8.735147929                            |
| 24.5                                            | 3.433333333                                      | 4.45                                        | 1.3875                                 |
| 410.0666667                                     | 55.32682927                                      | 157.7439024                                 | 147.2999703                            |
| 126.8950617                                     | 14.24691358                                      | 12.62345679                                 | 7.875361988                            |
| 101.7033639                                     | 17.64831804                                      | 64.19571865                                 | 54.42770436                            |
| 355.9620035                                     | 61.41278066                                      | 155.3471503                                 | 142.8724679                            |
| 459.2577108                                     | 83.83207676                                      | 186.4167238                                 | 170.5807972                            |
| 64.71428571                                     | 5                                                | 5.907142857                                 | 2.641377551                            |
| 129.2645012                                     | 20.81438515                                      | 24.80278422                                 | 16.84279262                            |
| 24                                              | 3.4375                                           | 5.609375                                    | 1.915771484                            |
| 35.79699248                                     | 8.609022556                                      | 16.96992481                                 | 8.849567528                            |
| 128.6611296                                     | 11.87043189                                      | 44.25581395                                 | 37.06771448                            |

| log.sigma.3.0.mm.3D_glszm_ZonePercentage | log.sigma.3.0.mm.3D_glszm_LargeAreaLowGrayLevelEmphasis | log.sigma.3.0.mm.3D_glszm_LargeAreaHighGrayLevelEmphasis | log.sigma.3.0.mm.3D_glszm_HighGrayLevelZoneEmphasis |
|------------------------------------------|---------------------------------------------------------|----------------------------------------------------------|-----------------------------------------------------|
| 0.419263456                              | 0.14310663                                              | 4099.476351                                              | 336.9290541                                         |
| 0.266730862                              | 0.841395967                                             | 40173.213                                                | 300.2454874                                         |
| 0.453917051                              | 0.289172103                                             | 1193.192893                                              | 182.4720812                                         |
| 0.399240987                              | 0.109199095                                             | 4997.094106                                              | 306.4809886                                         |
| 0.415041783                              | 0.075436827                                             | 3138.993289                                              | 302.6711409                                         |
| 0.353032659                              | 0.329665118                                             | 1984.484581                                              | 182.5022026                                         |
| 0.299703264                              | 0.36544581                                              | 4049.772277                                              | 157.2277228                                         |
| 0.461077844                              | 0.101428578                                             | 2650.242424                                              | 363.3658009                                         |
| 0.405483405                              | 0.13930908                                              | 5016.442467                                              | 339.9193357                                         |
| 0.300193673                              | 0.694607436                                             | 13930.95914                                              | 261.7688172                                         |
| 0.351874244                              | 0.09112201                                              | 6755.051546                                              | 318.3367698                                         |
| 0.36977058                               | 0.347724449                                             | 3962.193431                                              | 239.6076642                                         |
| 0.286403086                              | 0.563164472                                             | 4698.479798                                              | 184.5791246                                         |
| 0.362254025                              | 0.350138235                                             | 3323.432099                                              | 202.7111111                                         |
| 0.41053787                               | 0.138652389                                             | 3143.831551                                              | 208.6283422                                         |
| 0.157190154                              | 20.98506159                                             | 648962.7555                                              | 253.7527473                                         |
| 0.426934097                              | 0.210881953                                             | 2256.385906                                              | 252.0302013                                         |
| 0.331046312                              | 1.339149416                                             | 4214.212435                                              | 200.6282383                                         |
| 0.4604811                                | 0.172586224                                             | 2077.757463                                              | 291.5522388                                         |
| 0.21813638                               | 4.070886317                                             | 20559.22259                                              | 167.99509                                           |
| 0.249042879                              | 1.977463489                                             | 56436.54189                                              | 276.2513451                                         |
| 0.360465116                              | 0.363444553                                             | 3099.333871                                              | 222.6096774                                         |
| 0.33687294                               | 0.505472828                                             | 5665.463043                                              | 235.4206522                                         |
| 0.413721414                              | 0.050807494                                             | 7335.452261                                              | 418.5226131                                         |
| 0.341362126                              | 0.592335825                                             | 5430.722628                                              | 202.810219                                          |
| 0.414985591                              | 0.17600507                                              | 2841.850694                                              | 281.0590278                                         |
| 0.217830352                              | 1.904575362                                             | 150867.8728                                              | 380.2874172                                         |
| 0.364270761                              | 0.292128318                                             | 3841.072797                                              | 240.8448276                                         |
| 0.427195467                              | 0.103381287                                             | 4487.477454                                              | 275.3580902                                         |
| 0.2631786                                | 1.080285238                                             | 43541.24066                                              | 270.6860987                                         |
| 0.310160428                              | 0.770320683                                             | 15733.19067                                              | 278.9462475                                         |
| 0.284991568                              | 0.841497271                                             | 12273.46982                                              | 230.6579882                                         |
| 0.365961633                              | 0.191776244                                             | 5474.52957                                               | 259.8481183                                         |
| 0.615384615                              | 0.030762086                                             | 1468                                                     | 386.1875                                            |
| 0.542168675                              | 0.083006786                                             | 1651.177778                                              | 303.9611111                                         |
| 0.336633663                              | 0.194116617                                             | 5225.548529                                              | 264.4985294                                         |
| 0.344791667                              | 0.554732169                                             | 5531.423968                                              | 243.6102719                                         |
| 0.29994037                               | 0.824469615                                             | 12289.42644                                              | 200.8230616                                         |
| 0.362874251                              | 0.116733807                                             | 6115.052805                                              | 283.6831683                                         |
| 0.353670162                              | 0.295043667                                             | 4804.002695                                              | 248.2479784                                         |
| 0.310040706                              | 0.541207244                                             | 8701.849015                                              | 220.6980306                                         |
| 0.416579224                              | 0.092357573                                             | 2870.493703                                              | 300.8790932                                         |
| 0.381851401                              | 0.160662857                                             | 4520.556619                                              | 235.3460925                                         |
| 0.445853659                              | 0.12076637                                              | 3258.708972                                              | 333.726477                                          |
| 0.385516507                              | 0.090732701                                             | 6938.030387                                              | 327.3977901                                         |
| 0.259874327                              | 5.204721991                                             | 5064.056995                                              | 106.3955095                                         |
| 0.372714487                              | 0.162724639                                             | 7194.208805                                              | 299.6918239                                         |
| 0.396226415                              | 1.004012931                                             | 1639.554113                                              | 173.4290004                                         |
| 0.5                                      | 0.044818182                                             | 5767.179104                                              | 480.0447761                                         |
| 0.438631791                              | 0.102934894                                             | 5167.385321                                              | 361.9633028                                         |
| 0.306950935                              | 0.546481034                                             | 11662.10561                                              | 234.4376784                                         |
| 0.344619105                              | 0.911682634                                             | 3780.178947                                              | 195.4385965                                         |
| 0.326092646                              | 0.332989203                                             | 15645.82745                                              | 327.570626                                          |
| 0.336717428                              | 0.28688629                                              | 3474.527638                                              | 198.4522613                                         |
| 0.205580254                              | 8.483391421                                             | 122644.6197                                              | 189.5242356                                         |
| 0.489192264                              | 0.149161998                                             | 1820.574419                                              | 271.2162791                                         |
| 0.467852257                              | 0.058245337                                             | 3706.235867                                              | 406.2163743                                         |
| 0.420726991                              | 0.063114985                                             | 8867.727941                                              | 397.4283088                                         |
| 0.35995086                               | 0.230064771                                             | 5068.303754                                              | 264.8703072                                         |
| 0.287173666                              | 0.41841875                                              | 7004.047431                                              | 228.1541502                                         |
| 0.362907032                              | 0.697826631                                             | 3949.564369                                              | 286.8660598                                         |
| 0.341730559                              | 0.34848074                                              | 11922.30609                                              | 280.232906                                          |
| 0.22394822                               | 1.608870471                                             | 52249.99422                                              | 244.5231214                                         |
| 0.201757598                              | 2.410413693                                             | 157875.3666                                              | 307.2540835                                         |
| 0.502304147                              | 0.099324191                                             | 1481.706422                                              | 246.4862385                                         |
| 0.381841597                              | 0.169971379                                             | 8548.703204                                              | 315.7419899                                         |
| 0.461928934                              | 0.06154099                                              | 3220.005495                                              | 353.5604396                                         |
| 0.355333125                              | 0.294640555                                             | 6765.697183                                              | 321.3679577                                         |
| 0.421524664                              | 0.540587961                                             | 1688.25                                                  | 201.7393617                                         |
| 0.390850323                              | 0.240252513                                             | 3988.301527                                              | 275.8715013                                         |
| 0.363486842                              | 0.231418775                                             | 5503.127602                                              | 306.6316742                                         |
| 0.372010629                              | 0.276710098                                             | 3320.32381                                               | 239.9380952                                         |
| 0.264512384                              | 1.662425463                                             | 25546.35991                                              | 218.0292612                                         |
| 0.241810602                              | 0.985092678                                             | 42497.43042                                              | 324.2703202                                         |
| 0.256427015                              | 2.231000541                                             | 240073.0234                                              | 382.3683093                                         |
| 0.452508961                              | 0.085925546                                             | 3068.706931                                              | 316.0752475                                         |
| 0.385854969                              | 0.120910464                                             | 3468.691415                                              | 265.1531323                                         |
| 0.408196721                              | 0.861046639                                             | 1227.096386                                              | 190.0522088                                         |
| 0.401360544                              | 0.116792445                                             | 4252.360169                                              | 326.6652542                                         |
| 0.347856641                              | 0.323309647                                             | 5083.431313                                              | 234.2050505                                         |
| 0.557539683                              | 0.051550724                                             | 1560.298932                                              | 384.7295374                                         |
| 0.527218494                              | 0.041694915                                             | 2226.398868                                              | 373.7708628                                         |
| 0.382163324                              | 0.168437157                                             | 8965.645736                                              | 312.6551078                                         |
| 0.544827586                              | 0.035051977                                             | 2120.227848                                              | 386.0886076                                         |
| 0.307578885                              | 0.482759688                                             | 5399.040268                                              | 211.8791946                                         |
| 0.231738495                              | 1.940368743                                             | 79930.52325                                              | 311.144208                                          |
| 0.416452442                              | 0.367501547                                             | 1770.722222                                              | 226.3858025                                         |
| 0.483891753                              | 0.044992803                                             | 3138.005326                                              | 410.114514                                          |
| 0.355191257                              | 0.161274002                                             | 2854.384615                                              | 173.5692308                                         |
| 0.571428571                              | 0.046656444                                             | 1261.7                                                   | 253.6833333                                         |
| 0.309433962                              | 0.501173305                                             | 53356.53577                                              | 403.3544715                                         |
| 0.458923513                              | 0.171767748                                             | 1742.848765                                              | 303.632716                                          |
| 0.319960861                              | 0.338654759                                             | 13938.58716                                              | 252.5504587                                         |
| 0.283129584                              | 1.104688963                                             | 27034.46891                                              | 220.3825561                                         |
| 0.251291767                              | 2.037333282                                             | 23662.25017                                              | 182.4105552                                         |
| 0.553359684                              | 0.067312401                                             | 2304.964286                                              | 384.3285714                                         |
| 0.354440789                              | 0.126881792                                             | 7417.276102                                              | 269.7424594                                         |
| 0.520325203                              | 0.295560347                                             | 1395.484375                                              | 298.15625                                           |
| 0.350923483                              | 0.279677295                                             | 2725.706767                                              | 175.0526316                                         |
| 0.372986369                              | 0.20861104                                              | 11286.44518                                              | 416.5747508                                         |

| log.sigma.3.0.mm.3D_glszm_SmallAreaEmphasis | log.sigma.3.0.mm.3D_glszm_LowGrayLevelZoneEmphasis | log.sigma.3.0.mm.3D_glszm_ZoneEntropy | log.sigma.3.0.mm.3D_glszm_SmallAreaLowGrayLevelEmphasis |
|---------------------------------------------|----------------------------------------------------|---------------------------------------|---------------------------------------------------------|
| 0.678961231                                 | 0.010328281                                        | 6.135432985                           | 0.008319                                                |
| 0.608072455                                 | 0.008215193                                        | 6.412734762                           | 0.005362991                                             |
| 0.667025754                                 | 0.023266004                                        | 5.720112155                           | 0.016991346                                             |
| 0.596137249                                 | 0.011806703                                        | 6.624444796                           | 0.007938387                                             |
| 0.534075769                                 | 0.019721047                                        | 6.079480349                           | 0.015349631                                             |
| 0.533168141                                 | 0.017159711                                        | 6.039445543                           | 0.010290624                                             |
| 0.514691847                                 | 0.023896163                                        | 5.734605418                           | 0.015477302                                             |
| 0.645995375                                 | 0.009147247                                        | 6.329856389                           | 0.006947913                                             |
| 0.613578617                                 | 0.008892531                                        | 6.675344778                           | 0.005940245                                             |
| 0.608342353                                 | 0.010337762                                        | 6.449010512                           | 0.006189772                                             |
| 0.545390209                                 | 0.008109762                                        | 6.126330452                           | 0.00595337                                              |
| 0.638944995                                 | 0.014196892                                        | 6.331655828                           | 0.008417897                                             |
| 0.513148765                                 | 0.020368293                                        | 6.778049682                           | 0.012449202                                             |
| 0.574926346                                 | 0.014104627                                        | 6.265909461                           | 0.007338243                                             |
| 0.590311135                                 | 0.016841854                                        | 6.230800553                           | 0.012098346                                             |
| 0.604423063                                 | 0.008473239                                        | 6.51965746                            | 0.004691566                                             |
| 0.599749737                                 | 0.013684748                                        | 6.161807187                           | 0.007552086                                             |
| 0.613274644                                 | 0.022110296                                        | 6.441014421                           | 0.012559782                                             |
| 0.643577576                                 | 0.014202733                                        | 6.071356915                           | 0.009837347                                             |
| 0.589197671                                 | 0.016575576                                        | 6.254783229                           | 0.00988416                                              |
| 0.598025467                                 | 0.007085881                                        | 6.420150011                           | 0.004634281                                             |
| 0.581882563                                 | 0.016035289                                        | 6.535110328                           | 0.008845928                                             |
| 0.602925809                                 | 0.009675659                                        | 6.356591029                           | 0.005379514                                             |
| 0.640211403                                 | 0.009241588                                        | 5.966970881                           | 0.00780156                                              |
| 0.640299756                                 | 0.012216762                                        | 5.981921714                           | 0.008474509                                             |
| 0.63570419                                  | 0.011508148                                        | 6.164115179                           | 0.005527441                                             |
| 0.612344865                                 | 0.005226829                                        | 6.422626874                           | 0.003740407                                             |
| 0.631623229                                 | 0.010139226                                        | 6.137354486                           | 0.006756135                                             |
| 0.62396112                                  | 0.010072074                                        | 6.374906959                           | 0.006831274                                             |
| 0.615822847                                 | 0.010646667                                        | 6.453392972                           | 0.005681092                                             |
| 0.602833386                                 | 0.006810271                                        | 6.268209589                           | 0.004234036                                             |
| 0.568850652                                 | 0.009805473                                        | 6.644394444                           | 0.005616373                                             |
| 0.588310307                                 | 0.01201881                                         | 6.619732498                           | 0.007784559                                             |
| 0.692491319                                 | 0.021513421                                        | 5.283214016                           | 0.020152856                                             |
| 0.69765675                                  | 0.017695903                                        | 5.800958876                           | 0.009859704                                             |
| 0.549927664                                 | 0.009308629                                        | 6.584357329                           | 0.005453204                                             |
| 0.629443006                                 | 0.013646772                                        | 6.471482383                           | 0.009050043                                             |
| 0.591371865                                 | 0.016166209                                        | 6.398206542                           | 0.009972312                                             |
| 0.554412509                                 | 0.01237579                                         | 6.369446286                           | 0.009184809                                             |
| 0.609805094                                 | 0.016242663                                        | 6.288978738                           | 0.012429732                                             |
| 0.610619311                                 | 0.013296392                                        | 6.281656235                           | 0.006534077                                             |
| 0.578328311                                 | 0.010680043                                        | 6.468927716                           | 0.006943678                                             |
| 0.586572839                                 | 0.01738445                                         | 6.510926212                           | 0.011845786                                             |
| 0.640298986                                 | 0.00835285                                         | 6.261051045                           | 0.00412861                                              |
| 0.58192848                                  | 0.006907297                                        | 6.478676773                           | 0.004560788                                             |
| 0.582446625                                 | 0.036283683                                        | 6.104276162                           | 0.017306123                                             |
| 0.602057096                                 | 0.007654574                                        | 6.621518309                           | 0.005163022                                             |
| 0.61422791                                  | 0.033585837                                        | 5.956597649                           | 0.017091774                                             |
| 0.681671489                                 | 0.022368457                                        | 5.453857101                           | 0.02135421                                              |
| 0.664051757                                 | 0.013823136                                        | 6.090367998                           | 0.010240698                                             |
| 0.59327743                                  | 0.011380391                                        | 6.584345965                           | 0.007383576                                             |
| 0.587667691                                 | 0.017665312                                        | 6.037389704                           | 0.012635986                                             |
| 0.607000521                                 | 0.006692574                                        | 6.647837981                           | 0.004438848                                             |
| 0.53485716                                  | 0.018186646                                        | 6.018457846                           | 0.013053097                                             |
| 0.602194115                                 | 0.014657862                                        | 6.516352916                           | 0.009035474                                             |
| 0.665913621                                 | 0.024611577                                        | 6.20596737                            | 0.016166192                                             |
| 0.646091878                                 | 0.006832661                                        | 6.529745341                           | 0.004688228                                             |
| 0.615839229                                 | 0.008365788                                        | 6.464482932                           | 0.006485524                                             |
| 0.628964523                                 | 0.012519166                                        | 6.063864351                           | 0.00974596                                              |
| 0.559247728                                 | 0.011598168                                        | 6.061869191                           | 0.008761096                                             |
| 0.623615442                                 | 0.013499401                                        | 6.40639592                            | 0.006385146                                             |
| 0.618799698                                 | 0.009852311                                        | 6.749019189                           | 0.006183959                                             |
| 0.558813723                                 | 0.008249859                                        | 6.446199443                           | 0.00536819                                              |
| 0.605966144                                 | 0.008762392                                        | 6.285675341                           | 0.006790855                                             |
| 0.669086531                                 | 0.019998621                                        | 5.371139086                           | 0.013817612                                             |
| 0.612134495                                 | 0.009230518                                        | 6.535228211                           | 0.00614124                                              |
| 0.609482281                                 | 0.011526764                                        | 6.033030479                           | 0.008652948                                             |
| 0.623367199                                 | 0.007035051                                        | 6.553143104                           | 0.004507303                                             |
| 0.628369597                                 | 0.028560304                                        | 5.716336594                           | 0.022426008                                             |
| 0.622773855                                 | 0.011307066                                        | 6.417368909                           | 0.007804625                                             |
| 0.607372922                                 | 0.007075455                                        | 6.508038193                           | 0.003839141                                             |
| 0.587982216                                 | 0.013964129                                        | 6.400005074                           | 0.007778496                                             |
| 0.588364776                                 | 0.011578752                                        | 6.57200932                            | 0.00714376                                              |
| 0.609732531                                 | 0.005232112                                        | 6.428848572                           | 0.003376136                                             |
| 0.597992567                                 | 0.004630676                                        | 6.741733562                           | 0.003044034                                             |
| 0.609837999                                 | 0.012085608                                        | 6.425356609                           | 0.006757041                                             |
| 0.562475644                                 | 0.011437157                                        | 6.417309276                           | 0.007825656                                             |
| 0.63791903                                  | 0.032983337                                        | 5.977752633                           | 0.025602112                                             |
| 0.613760527                                 | 0.00798043                                         | 6.400337457                           | 0.005081324                                             |
| 0.584711752                                 | 0.010746382                                        | 6.500412312                           | 0.00683918                                              |
| 0.713216669                                 | 0.010294566                                        | 5.922890198                           | 0.008310357                                             |
| 0.669475429                                 | 0.010031258                                        | 6.396675384                           | 0.007809415                                             |
| 0.624482901                                 | 0.008099407                                        | 6.562533505                           | 0.004968101                                             |
| 0.652267932                                 | 0.020349978                                        | 5.349551913                           | 0.019080231                                             |
| 0.569514392                                 | 0.010487987                                        | 6.552114531                           | 0.00596276                                              |
| 0.594327557                                 | 0.00622706                                         | 6.559397583                           | 0.003972985                                             |
| 0.625623439                                 | 0.017755275                                        | 6.086218144                           | 0.011720413                                             |
| 0.643297207                                 | 0.00700019                                         | 6.412552707                           | 0.005129136                                             |
| 0.573759848                                 | 0.028520949                                        | 5.261076375                           | 0.024823661                                             |
| 0.648583333                                 | 0.027767412                                        | 5.142318879                           | 0.025339167                                             |
| 0.594487902                                 | 0.005792004                                        | 6.73901628                            | 0.004084453                                             |
| 0.648753398                                 | 0.012063842                                        | 6.181378344                           | 0.008655441                                             |
| 0.571115776                                 | 0.010786646                                        | 6.243815415                           | 0.007530212                                             |
| 0.57054665                                  | 0.013932393                                        | 6.622299684                           | 0.008204361                                             |
| 0.577472943                                 | 0.016650036                                        | 6.528766899                           | 0.009179549                                             |
| 0.706617438                                 | 0.026316124                                        | 5.868843843                           | 0.023135503                                             |
| 0.560781211                                 | 0.015911817                                        | 6.522308182                           | 0.011409359                                             |
| 0.629741621                                 | 0.023085624                                        | 5.220714016                           | 0.005058527                                             |
| 0.52733896                                  | 0.02141263                                         | 5.728818974                           | 0.008329241                                             |
| 0.679202931                                 | 0.00871036                                         | 6.210699031                           | 0.004509668                                             |



| log.sigma.3.0.mm.3D_ngtdm_Coarseness | log.sigma.3.0.mm.3D_ngtdm_Complexity | log.sigma.3.0.mm.3D_ngtdm_Strength | log.sigma.3.0.mm.3D_ngtdm_Busyness | log.sigma.3.0.mm.3D_ngtdm_Contrast |
|--------------------------------------|--------------------------------------|------------------------------------|------------------------------------|------------------------------------|
| 0.013134636                          | 1.43331873                           | 4.16767132                         | 0.167679527                        | 0.000235666                        |
| 0.005496517                          | 0.374990788                          | 1.644042115                        | 0.362703051                        | 4.44E-05                           |
| 0.018670767                          | 1.667201814                          | 4.684368256                        | 0.206562522                        | 0.000415339                        |
| 0.003492635                          | 0.474048152                          | 1.240253275                        | 0.511634251                        | 6.10E-05                           |
| 0.028468094                          | 2.353412467                          | 8.335910059                        | 0.077858644                        | 0.00057583                         |
| 0.013293357                          | 0.671302185                          | 2.181684171                        | 0.330224908                        | 0.000252207                        |
| 0.026894368                          | 0.894138915                          | 4.23653348                         | 0.138663926                        | 0.000276119                        |
| 0.007925142                          | 1.622339777                          | 3.524666121                        | 0.215297567                        | 0.000215343                        |
| 0.004571558                          | 0.637298607                          | 1.73667279                         | 0.416851595                        | 8.65E-05                           |
| 0.003106051                          | 0.261526807                          | 1.055617296                        | 0.717128316                        | 2.93E-05                           |
| 0.008321612                          | 0.650827944                          | 1.691837519                        | 0.322523407                        | 0.000261145                        |
| 0.00670928                           | 0.539815071                          | 1.96296649                         | 0.447149127                        | 9.58E-05                           |
| 0.004644721                          | 0.310871574                          | 1.291933712                        | 0.683951109                        | 5.65E-05                           |
| 0.007733108                          | 0.582658117                          | 1.909987032                        | 0.400475276                        | 0.000143168                        |
| 0.009877582                          | 0.656273509                          | 1.902738055                        | 0.333788331                        | 0.000188065                        |
| 0.001713773                          | 1.110853041                          | 1.160347243                        | 0.801029955                        | 3.49E-06                           |
| 0.011862216                          | 1.24633732                           | 3.209298346                        | 0.219971199                        | 0.000303202                        |
| 0.004224915                          | 0.295920918                          | 1.13549047                         | 1.012956042                        | 7.41E-05                           |
| 0.015940176                          | 1.586796403                          | 4.340647701                        | 0.170110592                        | 0.000464283                        |
| 0.003983924                          | 0.13417005                           | 0.727434845                        | 1.022753812                        | 3.13E-05                           |
| 0.001892203                          | 0.131684353                          | 0.599193656                        | 1.02183475                         | 1.14E-05                           |
| 0.005430712                          | 0.50842471                           | 1.709062873                        | 0.520592791                        | 8.56E-05                           |
| 0.003588463                          | 0.230141334                          | 0.902527934                        | 0.824511062                        | 4.21E-05                           |
| 0.018072132                          | 1.873831725                          | 5.541025001                        | 0.090251011                        | 0.000358355                        |
| 0.006836429                          | 0.542960099                          | 1.775877459                        | 0.449553621                        | 8.38E-05                           |
| 0.013439267                          | 1.452581872                          | 3.964203383                        | 0.200098115                        | 0.000270577                        |
| 0.003102548                          | 0.198629263                          | 1.213834717                        | 0.44934686                         | 1.31E-05                           |
| 0.006160216                          | 0.462312519                          | 1.491833945                        | 0.537053961                        | 0.000101558                        |
| 0.00412238                           | 0.590587029                          | 1.347096218                        | 0.511884887                        | 0.000134544                        |
| 0.004510926                          | 0.383077089                          | 1.941830031                        | 0.393409052                        | 2.84E-05                           |
| 0.002820682                          | 0.243369057                          | 0.870809263                        | 0.7646995                          | 2.67E-05                           |
| 0.001801465                          | 0.116020843                          | 0.564878402                        | 1.398344886                        | 1.47E-05                           |
| 0.004475006                          | 0.516264653                          | 1.520975604                        | 0.491865793                        | 7.88E-05                           |
| 0.060971558                          | 9.539530614                          | 1.745490496                        | 0.037921595                        | 0.003721263                        |
| 0.021626415                          | 2.734254079                          | 5.548104849                        | 0.113503657                        | 0.000965213                        |
| 0.004530779                          | 0.41502599                           | 1.345711545                        | 0.502151756                        | 7.38E-05                           |
| 0.002967855                          | 0.378847991                          | 1.226925085                        | 0.937948626                        | 5.02E-05                           |
| 0.002797155                          | 0.161572771                          | 0.584233606                        | 1.134042727                        | 3.55E-05                           |
| 0.009609837                          | 1.128686063                          | 3.105854017                        | 0.185853301                        | 0.000157693                        |
| 0.008501129                          | 0.776823582                          | 2.201769079                        | 0.316418352                        | 0.000165942                        |
| 0.007182542                          | 0.455089218                          | 1.871231409                        | 0.360867937                        | 6.97E-05                           |
| 0.009068787                          | 1.106548852                          | 3.154354953                        | 0.233633882                        | 0.000192645                        |
| 0.004737234                          | 0.540065103                          | 1.374388192                        | 0.490063108                        | 0.00011782                         |
| 0.008648084                          | 1.0892089                            | 2.79305451                         | 0.259846723                        | 0.000212089                        |
| 0.004574857                          | 0.515541529                          | 1.41246023                         | 0.40536301                         | 7.20E-05                           |
| 0.003702172                          | 0.175462619                          | 0.753720248                        | 1.800022875                        | 4.76E-05                           |
| 0.002225728                          | 0.234058396                          | 0.691044662                        | 0.899560656                        | 3.05E-05                           |
| 0.013466732                          | 1.102736724                          | 2.810682443                        | 0.310514056                        | 0.000411505                        |
| 0.042144929                          | 8.44264053                           | 17.2809897                         | 0.032824421                        | 0.002209696                        |
| 0.017330587                          | 2.687279566                          | 8.121352156                        | 0.078557634                        | 0.000338264                        |
| 0.002992995                          | 0.234747238                          | 1.021379344                        | 0.767497822                        | 2.56E-05                           |
| 0.007157766                          | 0.719825052                          | 1.534418816                        | 0.513779988                        | 0.000403048                        |
| 0.002581399                          | 0.308767247                          | 1.048368259                        | 0.652157885                        | 2.77E-05                           |
| 0.015579079                          | 0.752747826                          | 2.694047288                        | 0.223021376                        | 0.000239253                        |
| 0.001873919                          | 0.074015676                          | 0.433549999                        | 1.565776285                        | 1.23E-05                           |
| 0.009639411                          | 1.377667637                          | 3.059334965                        | 0.259790833                        | 0.000281424                        |
| 0.003802429                          | 0.799012171                          | 1.648573433                        | 0.393433008                        | 9.81E-05                           |
| 0.006899809                          | 0.99924156                           | 2.771052013                        | 0.186430035                        | 0.000118554                        |
| 0.011976274                          | 0.772110045                          | 2.538830988                        | 0.254701923                        | 0.000198943                        |
| 0.010305673                          | 0.439080541                          | 1.823652053                        | 0.323152999                        | 0.000129383                        |
| 0.003948704                          | 0.481021048                          | 1.408185607                        | 0.763710316                        | 8.29E-05                           |
| 0.001797258                          | 0.298643139                          | 1.106083969                        | 0.869733959                        | 1.81E-05                           |
| 0.003493167                          | 0.190591607                          | 1.074801648                        | 0.572969097                        | 1.70E-05                           |
| 0.003814708                          | 0.187293311                          | 0.900831463                        | 0.517772224                        | 2.62E-05                           |
| 0.039722367                          | 2.466333144                          | 6.897949569                        | 0.087172356                        | 0.001148631                        |
| 0.006969278                          | 0.799794339                          | 2.893640778                        | 0.237233801                        | 7.33E-05                           |
| 0.018179932                          | 2.974158457                          | 6.524779992                        | 0.090363537                        | 0.000510111                        |
| 0.002866956                          | 0.355983897                          | 1.025183156                        | 0.774240421                        | 5.33E-05                           |
| 0.015544286                          | 1.409312813                          | 3.528115732                        | 0.21954071                         | 0.000544377                        |
| 0.004539911                          | 0.520590928                          | 1.537311505                        | 0.544050227                        | 7.54E-05                           |
| 0.002981595                          | 0.311115161                          | 0.93439684                         | 0.832978029                        | 5.12E-05                           |
| 0.00731639                           | 0.841810232                          | 2.328110883                        | 0.377506508                        | 0.000169467                        |
| 0.001940322                          | 0.132801728                          | 0.564788138                        | 1.441418185                        | 1.82E-05                           |
| 0.001568287                          | 0.109024306                          | 0.505133363                        | 1.129096449                        | 9.35E-06                           |
| 0.001168849                          | 0.123098923                          | 0.651714635                        | 0.932582482                        | 5.15E-06                           |
| 0.007235351                          | 1.248846776                          | 2.72800537                         | 0.259424118                        | 0.000200325                        |
| 0.007311547                          | 0.96678645                           | 2.552131565                        | 0.2725172                          | 0.000127763                        |
| 0.012539711                          | 1.298291821                          | 3.380831149                        | 0.377623511                        | 0.000420867                        |
| 0.004686103                          | 0.597569508                          | 1.42369407                         | 0.479546061                        | 0.000106607                        |
| 0.003040119                          | 0.336339825                          | 1.023640066                        | 0.818894943                        | 4.43E-05                           |
| 0.015292364                          | 3.060027376                          | 5.683173576                        | 0.134501157                        | 0.000583718                        |
| 0.006111977                          | 1.232100129                          | 2.485609518                        | 0.263757709                        | 0.00017156                         |
| 0.003699825                          | 0.409090356                          | 1.291776551                        | 0.469058302                        | 4.73E-05                           |
| 0.053801573                          | 5.45158608                           | 14.67418659                        | 0.034766363                        | 0.001635949                        |
| 0.002734896                          | 0.181563358                          | 0.636763286                        | 1.254564324                        | 3.88E-05                           |
| 0.001874012                          | 0.171133821                          | 0.935732916                        | 0.767357526                        | 8.69E-06                           |
| 0.010794002                          | 1.017126308                          | 2.812352783                        | 0.366215467                        | 0.000302854                        |
| 0.004939288                          | 0.909052785                          | 2.062287141                        | 0.29337734                         | 0.000150043                        |
| 0.042358145                          | 1.425727747                          | 4.446534359                        | 0.156725767                        | 0.001274212                        |
| 0.053746367                          | 6.022342592                          | 11.39748384                        | 0.057398649                        | 0.003105136                        |
| 0.002728885                          | 0.335418243                          | 1.278509671                        | 0.451645486                        | 2.15E-05                           |
| 0.011232348                          | 1.934811225                          | 4.109092078                        | 0.251969029                        | 0.000349237                        |
| 0.009624043                          | 0.579340757                          | 2.053517112                        | 0.257693436                        | 0.000113241                        |
| 0.002387256                          | 0.184787355                          | 0.737028455                        | 0.997434881                        | 2.23E-05                           |
| 0.001677905                          | 0.099651149                          | 0.422674251                        | 1.931474178                        | 1.65E-05                           |
| 0.024986621                          | 8.014958979                          | 12.94022108                        | 0.069193889                        | 0.001855376                        |
| 0.008300906                          | 0.58241081                           | 2.047388348                        | 0.254474941                        | 0.000116781                        |
| 0.054351926                          | 5.927079128                          | 11.41196192                        | 0.058801363                        | 0.003314536                        |
| 0.024725738                          | 0.949342748                          | 4.129189745                        | 0.150565374                        | 0.000395902                        |
| 0.011377681                          | 1.88948708                           | 5.504436476                        | 0.135114975                        | 0.00017798                         |

| log.sigma.2.5.mm.3D_gldm_GrayLevelVariance | log.sigma.2.5.mm.3D_gldm_HighGrayLevelEmphasis | log.sigma.2.5.mm.3D_gldm_GrayLevelNonUniformityNormalized | log.sigma.2.5.mm.3D_gldm_DependenceEntropy |
|--------------------------------------------|------------------------------------------------|-----------------------------------------------------------|--------------------------------------------|
| 29.65155005                                | 225.7308782                                    | 0.052708873                                               | 6.511988156                                |
| 20.69402904                                | 249.1593645                                    | 0.070909605                                               | 6.985537042                                |
| 26.76809871                                | 186.6682028                                    | 0.059153943                                               | 6.257147991                                |
| 34.27558318                                | 367.4523719                                    | 0.047041108                                               | 6.883933801                                |
| 33.03455125                                | 308.9275766                                    | 0.053374819                                               | 6.388950893                                |
| 18.72621291                                | 141.4774495                                    | 0.065021321                                               | 6.25429869                                 |
| 12.57501607                                | 216.462908                                     | 0.095422166                                               | 5.856713999                                |
| 39.96716746                                | 236.8063872                                    | 0.046575512                                               | 6.611751962                                |
| 35.57317882                                | 281.5906686                                    | 0.046482137                                               | 6.869885825                                |
| 20.23794272                                | 238.1672046                                    | 0.06925666                                                | 6.739747003                                |
| 20.46987918                                | 261.1511487                                    | 0.066944083                                               | 6.302294954                                |
| 25.55425384                                | 195.8373819                                    | 0.057834819                                               | 6.746435384                                |
| 20.04946116                                | 158.6393443                                    | 0.063782292                                               | 6.574046567                                |
| 22.69131243                                | 158.2325581                                    | 0.060584484                                               | 6.452000556                                |
| 22.03060773                                | 220.9923161                                    | 0.059737011                                               | 6.401994997                                |
| 11.28780502                                | 171.3592918                                    | 0.137881464                                               | 6.823016252                                |
| 29.16348798                                | 216.2808023                                    | 0.053776242                                               | 6.459508608                                |
| 25.44432006                                | 152.5960549                                    | 0.057883235                                               | 6.906146074                                |
| 37.28492814                                | 232.8041237                                    | 0.046692883                                               | 6.561038431                                |
| 13.87254845                                | 120.2841842                                    | 0.07815985                                                | 6.892299677                                |
| 14.89918156                                | 200.0706355                                    | 0.082462055                                               | 6.774603008                                |
| 25.92803002                                | 216.6569767                                    | 0.056047188                                               | 6.559725654                                |
| 19.77976931                                | 162.7096302                                    | 0.067379817                                               | 6.64729767                                 |
| 28.43632246                                | 350.045738                                     | 0.057282775                                               | 6.40557875                                 |
| 17.37030151                                | 163.4709302                                    | 0.075335813                                               | 6.494739072                                |
| 30.5075119                                 | 236.4755043                                    | 0.053326579                                               | 6.639958908                                |
| 13.95427188                                | 313.1364686                                    | 0.093817811                                               | 6.919830672                                |
| 22.52931961                                | 172.4508025                                    | 0.067507058                                               | 6.48141596                                 |
| 34.80070171                                | 256.8866856                                    | 0.052414513                                               | 6.618305996                                |
| 19.60656811                                | 223.9323367                                    | 0.073296084                                               | 6.991589256                                |
| 17.54581878                                | 198.2406417                                    | 0.074259248                                               | 6.60198239                                 |
| 17.89062392                                | 157.1266442                                    | 0.071766392                                               | 6.902987969                                |
| 30.8793215                                 | 244.4589277                                    | 0.050894863                                               | 6.7934489                                  |
| 38.02727441                                | 432.2788462                                    | 0.057507396                                               | 5.469294526                                |
| 37.82271556                                | 270.936747                                     | 0.047212948                                               | 6.317167092                                |
| 25.10843937                                | 285.2118812                                    | 0.055607784                                               | 6.655834485                                |
| 28.57171103                                | 223.6006944                                    | 0.057070795                                               | 6.900672556                                |
| 19.2001807                                 | 203.2659511                                    | 0.063470881                                               | 6.736094931                                |
| 23.20352254                                | 278.9353293                                    | 0.062431783                                               | 6.434388588                                |
| 27.04493544                                | 219.5109628                                    | 0.054195698                                               | 6.674628396                                |
| 19.95293914                                | 166.5698779                                    | 0.064314237                                               | 6.791318378                                |
| 30.26281616                                | 221.706191                                     | 0.053475577                                               | 6.442045424                                |
| 28.27472068                                | 277.5761267                                    | 0.056282926                                               | 6.5424019                                  |
| 34.80932207                                | 298.9590244                                    | 0.048324569                                               | 6.714234653                                |
| 24.60676563                                | 252.4270501                                    | 0.056029628                                               | 6.515856979                                |
| 13.70848476                                | 93.07675045                                    | 0.08049623                                                | 6.542274049                                |
| 27.45219778                                | 308.749414                                     | 0.053160447                                               | 6.833517563                                |
| 25.83594056                                | 156.3361921                                    | 0.054944408                                               | 6.317023811                                |
| 35.0663845                                 | 500.2089552                                    | 0.091779906                                               | 5.497043672                                |
| 34.20515852                                | 252.7927565                                    | 0.062503795                                               | 6.286426793                                |
| 19.88195058                                | 223.3525117                                    | 0.064758999                                               | 6.814379368                                |
| 29.15093818                                | 172.8029021                                    | 0.064590038                                               | 6.269144521                                |
| 25.36261384                                | 356.7817325                                    | 0.056626485                                               | 7.018331067                                |
| 18.0338295                                 | 154.0659898                                    | 0.065629107                                               | 6.321091847                                |
| 16.21020552                                | 148.8183351                                    | 0.088696234                                               | 6.954510967                                |
| 39.12791322                                | 287.14562                                      | 0.044658515                                               | 6.587351673                                |
| 43.60944048                                | 363.8937528                                    | 0.042453406                                               | 6.878997576                                |
| 32.91852195                                | 376.4717711                                    | 0.056328652                                               | 6.603549684                                |
| 23.44975822                                | 209.6683047                                    | 0.058901653                                               | 6.688762718                                |
| 14.8615094                                 | 338.984109                                     | 0.073282476                                               | 6.280801549                                |
| 29.06376052                                | 217.2156678                                    | 0.055051255                                               | 6.643159337                                |
| 29.51450586                                | 246.8212851                                    | 0.053320854                                               | 7.045520031                                |
| 13.04424388                                | 179.6546926                                    | 0.085818121                                               | 6.752608149                                |
| 14.22717082                                | 504.3526181                                    | 0.092164351                                               | 6.955952222                                |
| 24.44311835                                | 181.2119816                                    | 0.059610525                                               | 5.866795634                                |
| 29.66355628                                | 273.5099807                                    | 0.057944472                                               | 6.691854186                                |
| 31.4412443                                 | 272.9517766                                    | 0.056713649                                               | 6.173828142                                |
| 31.49278653                                | 333.6130748                                    | 0.050282419                                               | 6.927508066                                |
| 25.48189185                                | 216.367713                                     | 0.0601661                                                 | 6.151163156                                |
| 29.35038393                                | 235.3749378                                    | 0.052943272                                               | 6.77194104                                 |
| 27.39560671                                | 227.7391447                                    | 0.055796399                                               | 6.809071017                                |
| 27.99443294                                | 185.4313552                                    | 0.055316752                                               | 6.596049243                                |
| 18.61933029                                | 219.1420279                                    | 0.069740541                                               | 6.995769397                                |
| 15.73910975                                | 207.043925                                     | 0.076853175                                               | 6.871586792                                |
| 18.23975293                                | 418.1308279                                    | 0.080657534                                               | 6.988151428                                |
| 38.46839953                                | 312.7625448                                    | 0.046468121                                               | 6.587571018                                |
| 26.36712354                                | 233.0367055                                    | 0.055298235                                               | 6.623116117                                |
| 29.25794141                                | 172.4721311                                    | 0.056237571                                               | 6.306659808                                |
| 29.75237523                                | 282.7318594                                    | 0.052093135                                               | 6.66813273                                 |
| 25.13259737                                | 213.4662684                                    | 0.058155125                                               | 6.725342759                                |
| 43.26341254                                | 268.9186508                                    | 0.044028723                                               | 6.335687934                                |
| 46.20488344                                | 379.01566                                      | 0.041762661                                               | 6.636992367                                |
| 31.23584153                                | 485.0082378                                    | 0.052108819                                               | 6.80122162                                 |
| 31.18478002                                | 400.0896552                                    | 0.065969084                                               | 5.732408597                                |
| 20.37882225                                | 178.8743733                                    | 0.062574697                                               | 6.690501008                                |
| 15.33490026                                | 320.7545654                                    | 0.082741291                                               | 6.909183901                                |
| 29.49034998                                | 186.6413882                                    | 0.055339312                                               | 6.442048127                                |
| 38.42836604                                | 388.7596649                                    | 0.050403869                                               | 6.613576699                                |
| 15.92570695                                | 155.7595628                                    | 0.073546538                                               | 5.749470405                                |
| 29.05705215                                | 274.8                                          | 0.083718821                                               | 5.412642751                                |
| 25.66060115                                | 525.7539623                                    | 0.060704751                                               | 7.101733515                                |
| 40.63402523                                | 288.7634561                                    | 0.047877762                                               | 6.541995721                                |
| 20.7003305                                 | 307.5088063                                    | 0.070628176                                               | 6.793738477                                |
| 18.96793186                                | 164.2794621                                    | 0.066809261                                               | 6.950186596                                |
| 16.71361755                                | 167.538753                                     | 0.069007687                                               | 6.871036455                                |
| 46.45845116                                | 399.0316206                                    | 0.038041525                                               | 6.311142799                                |
| 24.0501151                                 | 350.9876645                                    | 0.060241192                                               | 6.550496091                                |
| 35.64439157                                | 314.2357724                                    | 0.05651398                                                | 5.560162628                                |
| 18.68767274                                | 144.9683377                                    | 0.071254029                                               | 6.222305499                                |
| 33.07180203                                | 242.4064436                                    | 0.058476865                                               | 6.717199216                                |

| log.sigma.2.5.mm.3D_gldm_DependenceNonUniformity | log.sigma.2.5.mm.3D_gldm_GrayLevelNonUniformity | log.sigma.2.5.mm.3D_gldm_SmallDependenceEmphasis |
|--------------------------------------------------|-------------------------------------------------|--------------------------------------------------|
| 151.6855524                                      | 37.21246459                                     | 0.348012883                                      |
| 267.1887338                                      | 147.2792489                                     | 0.253655321                                      |
| 100.3870968                                      | 25.67281106                                     | 0.427118777                                      |
| 568.0208729                                      | 123.9533207                                     | 0.357232892                                      |
| 82.67688022                                      | 19.16155989                                     | 0.381866265                                      |
| 128.6734059                                      | 41.80870918                                     | 0.321815909                                      |
| 66.35311573                                      | 32.15727003                                     | 0.251452955                                      |
| 236.0359281                                      | 46.6686267                                      | 0.381210646                                      |
| 441.6993747                                      | 96.63636364                                     | 0.348313296                                      |
| 507.1142673                                      | 214.5571336                                     | 0.282110104                                      |
| 172.5018138                                      | 55.36275695                                     | 0.29212931                                       |
| 269.6126856                                      | 85.71120108                                     | 0.31711201                                       |
| 399.1465767                                      | 132.2844744                                     | 0.277609503                                      |
| 227.706619                                       | 67.73345259                                     | 0.313294773                                      |
| 209.1405049                                      | 54.42041712                                     | 0.357822376                                      |
| 597.3526702                                      | 957.8625306                                     | 0.156924894                                      |
| 154.1432665                                      | 37.53581662                                     | 0.352222297                                      |
| 379.3190395                                      | 134.983705                                      | 0.274785108                                      |
| 127.6632302                                      | 27.17525773                                     | 0.338554914                                      |
| 343.5947876                                      | 218.9257408                                     | 0.199263692                                      |
| 708.0371363                                      | 430.7817764                                     | 0.246284648                                      |
| 383.827907                                       | 96.40116279                                     | 0.328947631                                      |
| 473.5536434                                      | 184.0142805                                     | 0.303558203                                      |
| 106.5301455                                      | 27.55301455                                     | 0.368499788                                      |
| 205.5332226                                      | 90.70431894                                     | 0.315052916                                      |
| 133.1700288                                      | 37.00864553                                     | 0.322366604                                      |
| 385.694172                                       | 325.1725332                                     | 0.200507955                                      |
| 260.5408234                                      | 96.7376134                                      | 0.345405157                                      |
| 376.1240793                                      | 92.51161473                                     | 0.351219267                                      |
| 316.3367427                                      | 186.3186467                                     | 0.246709546                                      |
| 531.846178                                       | 236.0701478                                     | 0.296133589                                      |
| 892.2694772                                      | 425.5747049                                     | 0.247312576                                      |
| 405.2744712                                      | 103.4692573                                     | 0.315640543                                      |
| 31.94230769                                      | 5.980769231                                     | 0.467799145                                      |
| 82.57831325                                      | 15.67469888                                     | 0.40520164                                       |
| 401.3138614                                      | 112.3277228                                     | 0.286746139                                      |
| 486.1270833                                      | 164.3638889                                     | 0.313463093                                      |
| 582.1520572                                      | 212.8813357                                     | 0.280657588                                      |
| 178.7796407                                      | 52.13053892                                     | 0.294549388                                      |
| 211.8770257                                      | 56.85128694                                     | 0.347891085                                      |
| 228.734057                                       | 94.79918589                                     | 0.278925564                                      |
| 226.2088143                                      | 50.96222455                                     | 0.346808073                                      |
| 343.1985384                                      | 92.41656516                                     | 0.304539351                                      |
| 215.6185366                                      | 49.53268293                                     | 0.342903124                                      |
| 430.1384452                                      | 105.2236422                                     | 0.356500799                                      |
| 334.6651706                                      | 179.3456014                                     | 0.244490073                                      |
| 864.9540553                                      | 226.782466                                      | 0.335900235                                      |
| 130.9897084                                      | 32.03259005                                     | 0.349581805                                      |
| 29.86567164                                      | 12.29850746                                     | 0.354728187                                      |
| 99.76056338                                      | 31.06438632                                     | 0.333293286                                      |
| 572.8726636                                      | 221.7348131                                     | 0.282287488                                      |
| 163.0362757                                      | 53.41596131                                     | 0.292168527                                      |
| 621.565297                                       | 216.3697985                                     | 0.267975191                                      |
| 117.1962775                                      | 38.78680203                                     | 0.297784758                                      |
| 735.7919669                                      | 578.5655373                                     | 0.191254216                                      |
| 223.4527873                                      | 39.25483504                                     | 0.421025939                                      |
| 507.5517556                                      | 93.1003192                                      | 0.389957123                                      |
| 284.8391338                                      | 72.83294664                                     | 0.357732455                                      |
| 143.4889435                                      | 47.94594595                                     | 0.304867366                                      |
| 163.8217934                                      | 64.56186152                                     | 0.234109915                                      |
| 427.6833412                                      | 116.6536102                                     | 0.321918948                                      |
| 968.5808689                                      | 292.0916393                                     | 0.30144637                                       |
| 416.2323625                                      | 265.1779935                                     | 0.214270512                                      |
| 280.1270597                                      | 251.7008422                                     | 0.185478137                                      |
| 47.80184332                                      | 12.93548387                                     | 0.375969786                                      |
| 318.5016098                                      | 89.98776561                                     | 0.331019433                                      |
| 104.5482234                                      | 22.34517766                                     | 0.367820079                                      |
| 582.7366281                                      | 160.7528933                                     | 0.307047058                                      |
| 95.97757848                                      | 26.83408072                                     | 0.352463864                                      |
| 396.6240676                                      | 106.4689209                                     | 0.337203685                                      |
| 567.6493421                                      | 169.6210526                                     | 0.309547735                                      |
| 225.0832595                                      | 62.45261293                                     | 0.307888838                                      |
| 695.3618421                                      | 360.4191176                                     | 0.233569111                                      |
| 897.450268                                       | 516.1459202                                     | 0.223769039                                      |
| 1210.421133                                      | 740.4361656                                     | 0.239331449                                      |
| 277.5179211                                      | 51.85842294                                     | 0.384861112                                      |
| 223.7126231                                      | 61.76812892                                     | 0.312459817                                      |
| 133.1278689                                      | 34.30491803                                     | 0.333428437                                      |
| 370.2891156                                      | 91.89229025                                     | 0.336613381                                      |
| 521.7919888                                      | 165.509487                                      | 0.307919262                                      |
| 140.4880952                                      | 22.19047619                                     | 0.434971397                                      |
| 367.7964206                                      | 56.00372856                                     | 0.447269218                                      |
| 583.972063                                       | 145.4878223                                     | 0.350736006                                      |
| 33.63448276                                      | 9.565517241                                     | 0.374606263                                      |
| 608.3329401                                      | 212.1907992                                     | 0.274468343                                      |
| 708.090423                                       | 453.0913075                                     | 0.214529401                                      |
| 161.5089974                                      | 43.05398458                                     | 0.369812437                                      |
| 363.0811856                                      | 78.22680412                                     | 0.361132552                                      |
| 35.75409836                                      | 13.45901639                                     | 0.283029186                                      |
| 29.38095238                                      | 8.79047619                                      | 0.435039683                                      |
| 587.4538365                                      | 241.3013836                                     | 0.261257196                                      |
| 162.2492918                                      | 33.80169972                                     | 0.392205965                                      |
| 161.6849315                                      | 72.18199609                                     | 0.29108307                                       |
| 626.1281174                                      | 273.2498778                                     | 0.253767236                                      |
| 841.556321                                       | 400.658629                                      | 0.235094325                                      |
| 71.65612648                                      | 9.624505929                                     | 0.496346069                                      |
| 252.1990132                                      | 73.25328947                                     | 0.32075757                                       |
| 39.29268293                                      | 6.951219512                                     | 0.480126468                                      |
| 74.62005277                                      | 27.00527704                                     | 0.273813317                                      |
| 143.5848823                                      | 47.19083024                                     | 0.347330798                                      |

| log.sigma.2.5.mm.3D_gldm_DependenceNonUniformityNormalized | log.sigma.2.5.mm.3D_gldm_DependenceVariance | log.sigma.2.5.mm.3D_gldm_LargeDependenceEmphasis |
|------------------------------------------------------------|---------------------------------------------|--------------------------------------------------|
| 0.214852057                                                | 2.21015336                                  | 9.376770538                                      |
| 0.128641663                                                | 10.50370324                                 | 28.36928262                                      |
| 0.231306675                                                | 2.304869502                                 | 8.451612903                                      |
| 0.215567694                                                | 2.535567262                                 | 9.69601518                                       |
| 0.230297716                                                | 2.424686339                                 | 8.977715877                                      |
| 0.200114162                                                | 2.626848777                                 | 10.73561431                                      |
| 0.196893518                                                | 2.261990508                                 | 11.69436202                                      |
| 0.235564799                                                | 1.752267919                                 | 7.868263473                                      |
| 0.212457612                                                | 2.365323451                                 | 9.649350649                                      |
| 0.163690855                                                | 4.048945966                                 | 15.06843125                                      |
| 0.208587441                                                | 2.118728698                                 | 10.2140266                                       |
| 0.181924889                                                | 3.207300926                                 | 12.34547908                                      |
| 0.192452544                                                | 2.465691312                                 | 11.51783992                                      |
| 0.203673183                                                | 2.22137986                                  | 10.16994633                                      |
| 0.229572453                                                | 2.30746059                                  | 9.024149286                                      |
| 0.085987141                                                | 17.34777691                                 | 52.3171153                                       |
| 0.220835625                                                | 1.850543099                                 | 8.604584527                                      |
| 0.16265825                                                 | 4.025584823                                 | 15.25900515                                      |
| 0.219352629                                                | 2.142027137                                 | 9.271477663                                      |
| 0.122668614                                                | 8.193546932                                 | 27.35487326                                      |
| 0.13553544                                                 | 9.936018441                                 | 26.71401225                                      |
| 0.22315576                                                 | 1.878766901                                 | 8.919767442                                      |
| 0.173399357                                                | 3.563221464                                 | 13.44965214                                      |
| 0.221476394                                                | 2.475343727                                 | 9.37006237                                       |
| 0.170708657                                                | 4.975256896                                 | 15.5                                             |
| 0.19188765                                                 | 4.382986322                                 | 13.4870317                                       |
| 0.111279334                                                | 13.02950865                                 | 36.39526832                                      |
| 0.18181495                                                 | 3.684529111                                 | 12.72644801                                      |
| 0.213101461                                                | 2.272235232                                 | 9.450991501                                      |
| 0.124444037                                                | 11.72191618                                 | 31.06530291                                      |
| 0.167299836                                                | 4.400035385                                 | 15.16231519                                      |
| 0.150467028                                                | 7.506429309                                 | 21.85430017                                      |
| 0.199347994                                                | 2.682618739                                 | 10.94294147                                      |
| 0.307137574                                                | 0.922707101                                 | 5                                                |
| 0.248729859                                                | 1.522499637                                 | 7.042168675                                      |
| 0.198670228                                                | 2.196466033                                 | 10.75643564                                      |
| 0.168794126                                                | 4.590516493                                 | 15.08541667                                      |
| 0.173569486                                                | 3.529315027                                 | 13.79069767                                      |
| 0.214107354                                                | 2.216199935                                 | 10.23832335                                      |
| 0.201980005                                                | 2.966947504                                 | 10.8379409                                       |
| 0.155179143                                                | 4.566915638                                 | 16.51017639                                      |
| 0.237364968                                                | 1.893914286                                 | 8.44386149                                       |
| 0.209012508                                                | 1.949507523                                 | 9.729598051                                      |
| 0.210359548                                                | 2.398454253                                 | 9.823414634                                      |
| 0.229040706                                                | 1.778003473                                 | 8.272630458                                      |
| 0.150208784                                                | 5.148961802                                 | 18.50359066                                      |
| 0.202755287                                                | 2.843689975                                 | 10.7721519                                       |
| 0.224682176                                                | 1.883497259                                 | 8.636363636                                      |
| 0.222878147                                                | 2.582535086                                 | 9.880597015                                      |
| 0.20072548                                                 | 2.246541624                                 | 9.989939638                                      |
| 0.167310941                                                | 6.372548571                                 | 18.20502336                                      |
| 0.197141809                                                | 2.421371224                                 | 11.03385732                                      |
| 0.162670845                                                | 6.098198217                                 | 18.36927506                                      |
| 0.198301654                                                | 2.400497021                                 | 10.84094755                                      |
| 0.112799627                                                | 9.385236861                                 | 31.05488272                                      |
| 0.2542125                                                  | 1.757294785                                 | 7.19112628                                       |
| 0.231441749                                                | 1.873789858                                 | 8.015959872                                      |
| 0.22029322                                                 | 2.212159112                                 | 9.11446249                                       |
| 0.176276343                                                | 6.605593755                                 | 17.62407862                                      |
| 0.185949822                                                | 2.584293723                                 | 13.02724177                                      |
| 0.201832629                                                | 2.313454685                                 | 10.2005663                                       |
| 0.176812864                                                | 4.602902566                                 | 14.85505659                                      |
| 0.13470303                                                 | 7.645464124                                 | 24.4368932                                       |
| 0.102573072                                                | 14.1693128                                  | 40.79128524                                      |
| 0.220284992                                                | 2.393934889                                 | 9.221198157                                      |
| 0.205087965                                                | 2.431530855                                 | 10.18737927                                      |
| 0.265350821                                                | 1.259527429                                 | 6.807106599                                      |
| 0.18227608                                                 | 3.280131935                                 | 12.57147326                                      |
| 0.215196364                                                | 2.195740916                                 | 9.434977578                                      |
| 0.197227284                                                | 2.716986955                                 | 10.74241671                                      |
| 0.186726757                                                | 3.257797351                                 | 12.31710526                                      |
| 0.199365155                                                | 2.343342165                                 | 10.59433127                                      |
| 0.13455144                                                 | 7.616848953                                 | 23.84365325                                      |
| 0.133628688                                                | 7.192544646                                 | 23.54466945                                      |
| 0.131854154                                                | 7.881534832                                 | 24.43703704                                      |
| 0.248671972                                                | 1.55960869                                  | 7.292114695                                      |
| 0.200279877                                                | 2.196085723                                 | 10.22470904                                      |
| 0.218242408                                                | 1.990862671                                 | 9.131147541                                      |
| 0.209914465                                                | 2.120666029                                 | 9.48185941                                       |
| 0.183342231                                                | 2.971027626                                 | 12.04708363                                      |
| 0.278746221                                                | 1.507353867                                 | 6.392857143                                      |
| 0.274270261                                                | 1.423547265                                 | 6.233407905                                      |
| 0.209159048                                                | 2.837911327                                 | 10.42406877                                      |
| 0.23196195                                                 | 1.71196195                                  | 7.910344828                                      |
| 0.179396326                                                | 2.93320837                                  | 12.77292834                                      |
| 0.129308061                                                | 9.003573866                                 | 26.97151205                                      |
| 0.207595112                                                | 2.678028826                                 | 10.03341902                                      |
| 0.233944063                                                | 1.740653895                                 | 8.081185567                                      |
| 0.195377587                                                | 2.557257607                                 | 11.49180328                                      |
| 0.279818594                                                | 1.36                                        | 6.2                                              |
| 0.147787129                                                | 8.237782113                                 | 22.69308176                                      |
| 0.229814861                                                | 1.992159475                                 | 8.206798867                                      |
| 0.158204434                                                | 14.61154407                                 | 30.8630137                                       |
| 0.153087559                                                | 7.134905937                                 | 20.89193154                                      |
| 0.144945973                                                | 4.924401794                                 | 18.79572856                                      |
| 0.283225796                                                | 1.49091534                                  | 5.996047431                                      |
| 0.207400504                                                | 2.43572271                                  | 10.28125                                         |
| 0.319452707                                                | 0.803225593                                 | 4.642276423                                      |
| 0.196886683                                                | 2.748644189                                 | 11.90765172                                      |
| 0.177924266                                                | 4.151511941                                 | 13.66418835                                      |

| log.sigma.2.5.mm.3D_gldm_LargeDependenceLowGrayLevelEmphasis | log.sigma.2.5.mm.3D_gldm_SmallDependenceHighGrayLevelEmphasis | log.sigma.2.5.mm.3D_gldm_LargeDependenceHighGrayLevelEmphasis |
|--------------------------------------------------------------|---------------------------------------------------------------|---------------------------------------------------------------|
| 0.091793955                                                  | 95.17127351                                                   | 1663.226629                                                   |
| 0.141710028                                                  | 75.59532928                                                   | 6591.867116                                                   |
| 0.111095468                                                  | 100.3678109                                                   | 1108.958525                                                   |
| 0.042554782                                                  | 136.9319336                                                   | 3333.075142                                                   |
| 0.046719727                                                  | 120.2984801                                                   | 2669.406685                                                   |
| 0.196288312                                                  | 52.45461436                                                   | 1148.637636                                                   |
| 0.07008744                                                   | 51.09218797                                                   | 2643.489614                                                   |
| 0.127770566                                                  | 98.32680172                                                   | 1702.850299                                                   |
| 0.073041527                                                  | 107.4866586                                                   | 2479.252044                                                   |
| 0.095869535                                                  | 81.96584022                                                   | 2966.917366                                                   |
| 0.063107863                                                  | 76.13180347                                                   | 2582.948005                                                   |
| 0.125904945                                                  | 73.69388138                                                   | 1896.370445                                                   |
| 0.15236224                                                   | 47.50853869                                                   | 1638.070395                                                   |
| 0.180520751                                                  | 55.93070149                                                   | 1384.31127                                                    |
| 0.062507668                                                  | 81.64520442                                                   | 1907.646542                                                   |
| 0.376598807                                                  | 33.52514083                                                   | 7917.260256                                                   |
| 0.1068764                                                    | 81.44457339                                                   | 1686.653295                                                   |
| 0.28473695                                                   | 54.28627703                                                   | 1742.714408                                                   |
| 0.175946904                                                  | 86.22476659                                                   | 1814.718213                                                   |
| 0.386521331                                                  | 30.45807075                                                   | 2795.254552                                                   |
| 0.171344753                                                  | 60.51677597                                                   | 4706.406394                                                   |
| 0.084955074                                                  | 81.6787918                                                    | 1644.05814                                                    |
| 0.164953869                                                  | 61.72488409                                                   | 1669.446357                                                   |
| 0.042385733                                                  | 130.3798619                                                   | 3457.64657                                                    |
| 0.157946346                                                  | 64.27071647                                                   | 1958.180233                                                   |
| 0.108352948                                                  | 96.52391856                                                   | 2639.435159                                                   |
| 0.132458265                                                  | 74.69878626                                                   | 10584.59059                                                   |
| 0.143457703                                                  | 77.62013615                                                   | 1546.396371                                                   |
| 0.082750781                                                  | 89.36727268                                                   | 2654.121813                                                   |
| 0.168640131                                                  | 67.98977452                                                   | 6710.650669                                                   |
| 0.125731923                                                  | 73.16780966                                                   | 2355.120164                                                   |
| 0.244464855                                                  | 48.09731456                                                   | 2748.539798                                                   |
| 0.094469193                                                  | 83.36593036                                                   | 2429.030497                                                   |
| 0.026927917                                                  | 189.7078098                                                   | 2377.413462                                                   |
| 0.096331371                                                  | 111.0846796                                                   | 1839.960843                                                   |
| 0.063062218                                                  | 83.45230934                                                   | 2909.492079                                                   |
| 0.122965507                                                  | 87.42620804                                                   | 2698.819444                                                   |
| 0.113961331                                                  | 64.46747934                                                   | 2455.598092                                                   |
| 0.057210584                                                  | 78.48194243                                                   | 2842.588024                                                   |
| 0.108584597                                                  | 88.34054335                                                   | 2034.868446                                                   |
| 0.207439995                                                  | 55.42393387                                                   | 2365.297151                                                   |
| 0.101778217                                                  | 85.80249734                                                   | 1627.410283                                                   |
| 0.061723687                                                  | 88.25740067                                                   | 2682.805116                                                   |
| 0.072475844                                                  | 114.3537021                                                   | 2563.187317                                                   |
| 0.077918623                                                  | 91.17504305                                                   | 2094.87114                                                    |
| 0.459579316                                                  | 29.81457944                                                   | 1217.835278                                                   |
| 0.053560947                                                  | 112.8332888                                                   | 2990.661275                                                   |
| 0.245276257                                                  | 63.30567255                                                   | 1078.140652                                                   |
| 0.032120901                                                  | 161.5101885                                                   | 5014.985075                                                   |
| 0.199641938                                                  | 88.34719411                                                   | 2523.203219                                                   |
| 0.117118156                                                  | 75.65164349                                                   | 3548.743283                                                   |
| 0.206089981                                                  | 50.80371329                                                   | 1980.120919                                                   |
| 0.068603293                                                  | 109.4355799                                                   | 5918.745616                                                   |
| 0.169275143                                                  | 52.95913404                                                   | 1387.324873                                                   |
| 0.324618117                                                  | 35.59691803                                                   | 4015.563084                                                   |
| 0.057337928                                                  | 130.7380788                                                   | 1788.240046                                                   |
| 0.057938584                                                  | 149.6246832                                                   | 2738.462836                                                   |
| 0.039574764                                                  | 126.5667002                                                   | 3748.502707                                                   |
| 0.140488808                                                  | 76.79551033                                                   | 3217.855037                                                   |
| 0.051890072                                                  | 83.10036385                                                   | 3969.942111                                                   |
| 0.109575481                                                  | 80.90164933                                                   | 1752.368098                                                   |
| 0.1000716                                                    | 85.33346805                                                   | 3255.333881                                                   |
| 0.183676389                                                  | 45.57298747                                                   | 3857.051456                                                   |
| 0.085802937                                                  | 96.81754851                                                   | 20241.52289                                                   |
| 0.211732955                                                  | 74.75215728                                                   | 1329.258065                                                   |
| 0.065862729                                                  | 106.1542125                                                   | 2503.736639                                                   |
| 0.059179006                                                  | 106.443351                                                    | 1790.317259                                                   |
| 0.064071712                                                  | 115.6010662                                                   | 3554.744135                                                   |
| 0.10900794                                                   | 82.85418442                                                   | 1670.300448                                                   |
| 0.088470326                                                  | 88.65497265                                                   | 2155.810542                                                   |
| 0.107437985                                                  | 84.28131766                                                   | 2246.963487                                                   |
| 0.163876238                                                  | 65.25080581                                                   | 1560.786537                                                   |
| 0.150622672                                                  | 63.05988045                                                   | 4618.182276                                                   |
| 0.1521615                                                    | 55.56424064                                                   | 4360.820578                                                   |
| 0.065604511                                                  | 106.9616275                                                   | 9751.613617                                                   |
| 0.069723732                                                  | 120.032443                                                    | 2192.006272                                                   |
| 0.091942847                                                  | 79.21824122                                                   | 2183.68487                                                    |
| 0.164251942                                                  | 73.15938837                                                   | 1102.491803                                                   |
| 0.064942838                                                  | 102.8954879                                                   | 2428.013039                                                   |
| 0.105041291                                                  | 75.82970715                                                   | 2185.244202                                                   |
| 0.078121426                                                  | 135.8037904                                                   | 1265.736111                                                   |
| 0.039618115                                                  | 172.5685971                                                   | 2253.971663                                                   |
| 0.027765703                                                  | 176.8284492                                                   | 4909.983166                                                   |
| 0.03235376                                                   | 143.6978563                                                   | 3463.110345                                                   |
| 0.141285923                                                  | 56.82992521                                                   | 1907.971395                                                   |
| 0.101334484                                                  | 79.20233396                                                   | 7787.449963                                                   |
| 0.161484584                                                  | 83.52779689                                                   | 1261.888175                                                   |
| 0.040277693                                                  | 137.1547358                                                   | 3142.098582                                                   |
| 0.111842012                                                  | 41.72053845                                                   | 1981.879781                                                   |
| 0.104866028                                                  | 106.6775397                                                   | 1956.514286                                                   |
| 0.050093111                                                  | 143.6977261                                                   | 11314.8795                                                    |
| 0.062109812                                                  | 136.9917325                                                   | 1783.026912                                                   |
| 0.117060659                                                  | 94.48352059                                                   | 8928.565558                                                   |
| 0.204890913                                                  | 48.44058794                                                   | 3184.476039                                                   |
| 0.18446039                                                   | 48.3791657                                                    | 2663.696521                                                   |
| 0.051576641                                                  | 212.2874583                                                   | 2125.521739                                                   |
| 0.038462394                                                  | 107.965416                                                    | 3725.120888                                                   |
| 0.093666739                                                  | 147.5457882                                                   | 1562.105691                                                   |
| 0.268393854                                                  | 42.25928374                                                   | 1552.741425                                                   |
| 0.113168479                                                  | 105.2911376                                                   | 2660.674102                                                   |

| log.sigma.2.5.mm.3D_gldm_SmallDependenceLowGrayLevelEmphasis | log.sigma.2.5.mm.3D_gldm_LowGrayLevelEmphasis | log.sigma.2.5.mm.3D_gldm_DistanceZoneVariabilityNormalized |
|--------------------------------------------------------------|-----------------------------------------------|------------------------------------------------------------|
| 0.005084092                                                  | 0.010999462                                   | 0.914644371                                                |
| 0.002018538                                                  | 0.0065475                                     | 0.903009267                                                |
| 0.006344288                                                  | 0.013227696                                   | 0.91011036                                                 |
| 0.002379388                                                  | 0.005291745                                   | 0.872624303                                                |
| 0.006333823                                                  | 0.009824502                                   | 0.839950754                                                |
| 0.00635193                                                   | 0.017925014                                   | 0.916824197                                                |
| 0.005001684                                                  | 0.009498306                                   | 0.620146098                                                |
| 0.007537902                                                  | 0.018354327                                   | 0.846610646                                                |
| 0.00314441                                                   | 0.008852804                                   | 0.947824126                                                |
| 0.002206619                                                  | 0.006754949                                   | 0.954748699                                                |
| 0.003173196                                                  | 0.007233817                                   | 0.848598721                                                |
| 0.004710018                                                  | 0.011494653                                   | 0.935208015                                                |
| 0.004363482                                                  | 0.014265502                                   | 0.926136513                                                |
| 0.005391028                                                  | 0.018368816                                   | 0.909501752                                                |
| 0.005341534                                                  | 0.009902466                                   | 0.867346939                                                |
| 0.001744349                                                  | 0.008596595                                   | 0.915726975                                                |
| 0.007040715                                                  | 0.014063511                                   | 0.732857012                                                |
| 0.005297316                                                  | 0.018122589                                   | 0.962227238                                                |
| 0.00904431                                                   | 0.020638355                                   | 0.81027905                                                 |
| 0.003890221                                                  | 0.016724748                                   | 0.946748401                                                |
| 0.002292809                                                  | 0.007601529                                   | 0.914700255                                                |
| 0.003597156                                                  | 0.009737564                                   | 0.875722804                                                |
| 0.004038934                                                  | 0.012502728                                   | 0.931973208                                                |
| 0.006245783                                                  | 0.009669343                                   | 0.737139551                                                |
| 0.003881379                                                  | 0.011046129                                   | 0.930222559                                                |
| 0.003901635                                                  | 0.010122283                                   | 0.94779877                                                 |
| 0.001088129                                                  | 0.004181475                                   | 0.908739161                                                |
| 0.004842227                                                  | 0.012193101                                   | 0.938523558                                                |
| 0.004086163                                                  | 0.010385069                                   | 0.830592                                                   |
| 0.002201211                                                  | 0.007534405                                   | 0.942358592                                                |
| 0.002531034                                                  | 0.008686401                                   | 0.95820089                                                 |
| 0.003175521                                                  | 0.012807748                                   | 0.952981976                                                |
| 0.003127865                                                  | 0.009586132                                   | 0.917240526                                                |
| 0.011784568                                                  | 0.014012724                                   | 0.700555556                                                |
| 0.008028419                                                  | 0.01570405                                    | 0.849847712                                                |
| 0.002067969                                                  | 0.006072214                                   | 0.896766416                                                |
| 0.002804582                                                  | 0.008639212                                   | 0.95791421                                                 |
| 0.003849516                                                  | 0.010573324                                   | 0.937341739                                                |
| 0.003912949                                                  | 0.007979352                                   | 0.783085232                                                |
| 0.004041281                                                  | 0.010540721                                   | 0.932210455                                                |
| 0.005694549                                                  | 0.014925734                                   | 0.880251499                                                |
| 0.007221265                                                  | 0.014737304                                   | 0.904774467                                                |
| 0.002673194                                                  | 0.007303501                                   | 0.895393226                                                |
| 0.002853515                                                  | 0.007589191                                   | 0.867054756                                                |
| 0.003212406                                                  | 0.009520453                                   | 0.874282127                                                |
| 0.005550222                                                  | 0.023651228                                   | 0.990322809                                                |
| 0.002337143                                                  | 0.005704892                                   | 0.842956835                                                |
| 0.007106046                                                  | 0.022095529                                   | 0.945141779                                                |
| 0.010747188                                                  | 0.012395855                                   | 0.600475624                                                |
| 0.005699855                                                  | 0.018831414                                   | 0.779359249                                                |
| 0.00218822                                                   | 0.007317944                                   | 0.942228125                                                |
| 0.006018073                                                  | 0.019873234                                   | 0.972323792                                                |
| 0.001270641                                                  | 0.00417402                                    | 0.912326067                                                |
| 0.005436495                                                  | 0.016074366                                   | 0.89176072                                                 |
| 0.002795861                                                  | 0.013003267                                   | 0.963569405                                                |
| 0.005616665                                                  | 0.01023762                                    | 0.835384206                                                |
| 0.003046284                                                  | 0.008107402                                   | 0.733650208                                                |
| 0.004792204                                                  | 0.007971441                                   | 0.691193547                                                |
| 0.004313751                                                  | 0.011649347                                   | 0.902221278                                                |
| 0.002116102                                                  | 0.004846995                                   | 0.975810079                                                |
| 0.003071172                                                  | 0.010113036                                   | 0.922388625                                                |
| 0.002746389                                                  | 0.00808128                                    | 0.918877211                                                |
| 0.002208579                                                  | 0.00846059                                    | 0.935967721                                                |
| 0.000818998                                                  | 0.00262                                       | 0.961418454                                                |
| 0.0099611                                                    | 0.021076312                                   | 0.907625601                                                |
| 0.003068614                                                  | 0.007944402                                   | 0.894412223                                                |
| 0.006567333                                                  | 0.011803044                                   | 0.777098765                                                |
| 0.001617507                                                  | 0.005050529                                   | 0.940278777                                                |
| 0.005088712                                                  | 0.011252922                                   | 0.939756772                                                |
| 0.00468736                                                   | 0.010127972                                   | 0.91004668                                                 |
| 0.002657544                                                  | 0.008483614                                   | 0.885211319                                                |
| 0.005256499                                                  | 0.01515617                                    | 0.919573236                                                |
| 0.001631828                                                  | 0.006947919                                   | 0.951699857                                                |
| 0.00176926                                                   | 0.007130282                                   | 0.95905828                                                 |
| 0.000909927                                                  | 0.00306894                                    | 0.944877334                                                |
| 0.003757954                                                  | 0.010138143                                   | 0.811634349                                                |
| 0.004459168                                                  | 0.010557342                                   | 0.857988166                                                |
| 0.005115062                                                  | 0.015734836                                   | 0.92260666                                                 |
| 0.002923523                                                  | 0.007573224                                   | 0.832215239                                                |
| 0.00375348                                                   | 0.009853495                                   | 0.874315262                                                |
| 0.008485401                                                  | 0.014906198                                   | 0.847222222                                                |
| 0.005380996                                                  | 0.008518508                                   | 0.848583305                                                |
| 0.001410413                                                  | 0.003212553                                   | 0.894722983                                                |
| 0.010379243                                                  | 0.012644065                                   | 0.68                                                       |
| 0.002926017                                                  | 0.01044597                                    | 0.957086852                                                |
| 0.001042145                                                  | 0.004065651                                   | 0.762245482                                                |
| 0.005754365                                                  | 0.014825344                                   | 0.937387543                                                |
| 0.002490175                                                  | 0.005634674                                   | 0.792387543                                                |
| 0.009997308                                                  | 0.01874862                                    | 0.755102041                                                |
| 0.009140693                                                  | 0.026145002                                   | 0.802469136                                                |
| 0.001085874                                                  | 0.00279603                                    | 0.893172564                                                |
| 0.004566249                                                  | 0.008762271                                   | 0.981425781                                                |
| 0.002668397                                                  | 0.005720462                                   | 0.909297052                                                |
| 0.003975096                                                  | 0.01378199                                    | 0.921917253                                                |
| 0.002494305                                                  | 0.010284177                                   | 0.946400893                                                |
| 0.008915483                                                  | 0.013172351                                   | 0.67513536                                                 |
| 0.002599393                                                  | 0.005405904                                   | 0.978634971                                                |
| 0.009506757                                                  | 0.025425609                                   | 0.763557891                                                |
| 0.007213635                                                  | 0.02453919                                    | 0.872035429                                                |
| 0.005779895                                                  | 0.014309736                                   | 0.908468935                                                |

| log.sigma.2.5.mm.3D_gldzm_LowIntensityEmphasis | log.sigma.2.5.mm.3D_gldzm_LargeDistanceEmphasis | log.sigma.2.5.mm.3D_gldzm_HighIntensitySmallDistanceEmphasis |
|------------------------------------------------|-------------------------------------------------|--------------------------------------------------------------|
| 0.013390952                                    | 1.134020619                                     | 274.3264605                                                  |
| 0.007884257                                    | 1.153321976                                     | 294.673339                                                   |
| 0.014380372                                    | 1.141509434                                     | 224.2995283                                                  |
| 0.006364649                                    | 1.20508326                                      | 366.4252848                                                  |
| 0.014657641                                    | 1.263157895                                     | 307.2383041                                                  |
| 0.019981471                                    | 1.130434783                                     | 161.4110672                                                  |
| 0.017988467                                    | 1.764705882                                     | 187.7181373                                                  |
| 0.020302465                                    | 1.251101322                                     | 252.4818282                                                  |
| 0.009493995                                    | 1.08041958                                      | 303.5460373                                                  |
| 0.007534095                                    | 1.069486405                                     | 293.2716516                                                  |
| 0.009823054                                    | 1.247524752                                     | 252.9323432                                                  |
| 0.014321813                                    | 1.10058659                                      | 233.3743017                                                  |
| 0.01631399                                     | 1.115220484                                     | 170.4142959                                                  |
| 0.018939343                                    | 1.142517815                                     | 176.5124703                                                  |
| 0.013716758                                    | 1.214285714                                     | 223.028699                                                   |
| 0.011163737                                    | 1.132238548                                     | 215.0901037                                                  |
| 0.018220686                                    | 1.476351351                                     | 217.2871622                                                  |
| 0.018170731                                    | 1.057771664                                     | 201.8008941                                                  |
| 0.026180204                                    | 1.318367347                                     | 246.7734694                                                  |
| 0.019211214                                    | 1.082125604                                     | 158.8768116                                                  |
| 0.009078992                                    | 1.133928571                                     | 245.178228                                                   |
| 0.010587985                                    | 1.199710564                                     | 240.7825615                                                  |
| 0.013157913                                    | 1.105769231                                     | 206.1359509                                                  |
| 0.015447249                                    | 1.466981132                                     | 323.0919811                                                  |
| 0.012172474                                    | 1.108597285                                     | 200.9213801                                                  |
| 0.011773365                                    | 1.08045977                                      | 296.8831418                                                  |
| 0.005264353                                    | 1.143782383                                     | 364.0556995                                                  |
| 0.013763207                                    | 1.095238095                                     | 221.4188713                                                  |
| 0.011412853                                    | 1.108                                           | 249.703                                                      |
| 0.009060034                                    | 1.089108911                                     | 272.3613861                                                  |
| 0.008807673                                    | 1.064066852                                     | 249.5601207                                                  |
| 0.01315949                                     | 1.07226792                                      | 195.3119859                                                  |
| 0.010265198                                    | 1.129750983                                     | 260.3355177                                                  |
| 0.021443791                                    | 1.55                                            | 397.575                                                      |
| 0.018696782                                    | 1.245283019                                     | 270.7264151                                                  |
| 0.006967819                                    | 1.163793103                                     | 285.8559626                                                  |
| 0.00875027                                     | 1.064516129                                     | 279.2751711                                                  |
| 0.013992367                                    | 1.097132285                                     | 230.5305273                                                  |
| 0.011890857                                    | 1.371335505                                     | 258.9250814                                                  |
| 0.011593909                                    | 1.105386417                                     | 246.5620609                                                  |
| 0.020164852                                    | 1.191897655                                     | 191.5074627                                                  |
| 0.019671209                                    | 1.15037594                                      | 242.9392231                                                  |
| 0.008793405                                    | 1.166107383                                     | 280.1740772                                                  |
| 0.008103458                                    | 1.214797136                                     | 326.5817422                                                  |
| 0.00960818                                     | 1.202205882                                     | 247.8973652                                                  |
| 0.021796046                                    | 1.01458671                                      | 128.8209076                                                  |
| 0.006757871                                    | 1.257701422                                     | 317.5405806                                                  |
| 0.019959118                                    | 1.084677419                                     | 179.797379                                                   |
| 0.025373602                                    | 1.827586207                                     | 446.737069                                                   |
| 0.018305262                                    | 1.378787879                                     | 249.8270202                                                  |
| 0.007759768                                    | 1.089316988                                     | 263.408275                                                   |
| 0.020081528                                    | 1.042105263                                     | 177.6394737                                                  |
| 0.004617148                                    | 1.137844612                                     | 399.8807435                                                  |
| 0.018235428                                    | 1.172248804                                     | 177.6244019                                                  |
| 0.01491734                                     | 1.055679287                                     | 190.5740535                                                  |
| 0.012605614                                    | 1.271493213                                     | 299.3099548                                                  |
| 0.008201352                                    | 1.474609375                                     | 355.6767578                                                  |
| 0.012175419                                    | 1.572438163                                     | 330.0834806                                                  |
| 0.014497639                                    | 1.154639175                                     | 248.8780069                                                  |
| 0.008031705                                    | 1.036734694                                     | 366.0540816                                                  |
| 0.009867619                                    | 1.121323529                                     | 250.8008578                                                  |
| 0.009114946                                    | 1.127066116                                     | 274.678719                                                   |
| 0.010093597                                    | 1.099337748                                     | 212.486755                                                   |
| 0.00419752                                     | 1.059033989                                     | 525.9955277                                                  |
| 0.024601559                                    | 1.145631068                                     | 199.2621359                                                  |
| 0.00935042                                     | 1.167763158                                     | 306.3963816                                                  |
| 0.015932145                                    | 1.383333333                                     | 274.0361111                                                  |
| 0.005075381                                    | 1.092429577                                     | 378.6445863                                                  |
| 0.012953985                                    | 1.093264249                                     | 237.1389964                                                  |
| 0.013099096                                    | 1.141614907                                     | 261.6409938                                                  |
| 0.008321889                                    | 1.183394161                                     | 269.3106752                                                  |
| 0.016658321                                    | 1.125925926                                     | 215.0537037                                                  |
| 0.006899949                                    | 1.074289876                                     | 273.5579024                                                  |
| 0.007681422                                    | 1.062724014                                     | 255.5198626                                                  |
| 0.003739418                                    | 1.085097883                                     | 441.3921294                                                  |
| 0.01006846                                     | 1.315789474                                     | 304.6281676                                                  |
| 0.013609846                                    | 1.230769231                                     | 243.405649                                                   |
| 0.015013473                                    | 1.120967742                                     | 214.8366935                                                  |
| 0.008658214                                    | 1.277310924                                     | 294.6960784                                                  |
| 0.011947755                                    | 1.202148438                                     | 240.2832031                                                  |
| 0.018260129                                    | 1.25                                            | 300.1136364                                                  |
| 0.011067165                                    | 1.247552448                                     | 366.8552448                                                  |
| 0.003835561                                    | 1.167238422                                     | 483.2671527                                                  |
| 0.024023162                                    | 1.6                                             | 369.2576923                                                  |
| 0.010475323                                    | 1.065813528                                     | 208.3002742                                                  |
| 0.004767318                                    | 1.417047184                                     | 328.0881744                                                  |
| 0.01518943                                     | 1.097058824                                     | 224.1860294                                                  |
| 0.006597967                                    | 1.352941176                                     | 367.6301471                                                  |
| 0.032944504                                    | 1.428571429                                     | 140.2063492                                                  |
| 0.02796295                                     | 1.333333333                                     | 241.0787037                                                  |
| 0.003920321                                    | 1.169858451                                     | 534.8345129                                                  |
| 0.010703544                                    | 1.028125                                        | 355.2078125                                                  |
| 0.008451415                                    | 1.142857143                                     | 318.6064426                                                  |
| 0.01659653                                     | 1.122093023                                     | 191.5473422                                                  |
| 0.010631888                                    | 1.082677165                                     | 209.9675197                                                  |
| 0.016915002                                    | 1.612244898                                     | 383.9863946                                                  |
| 0.007674592                                    | 1.032397408                                     | 341.3650108                                                  |
| 0.024647938                                    | 1.410958904                                     | 303.0171233                                                  |
| 0.030331018                                    | 1.20610687                                      | 152.139313                                                   |
| 0.018974291                                    | 1.144230769                                     | 304.380609                                                   |

| log.sigma.2.5.mm.3D_gldzm_LowIntensityLargeDistanceEmphasis | log.sigma.2.5.mm.3D_gldzm_HighIntensityEmphasis | log.sigma.2.5.mm.3D_gldzm_DistanceZoneVariability | log.sigma.2.5.mm.3D_gldzm_ZonePercentage |
|-------------------------------------------------------------|-------------------------------------------------|---------------------------------------------------|------------------------------------------|
| 0.016147006                                                 | 277.0996564                                     | 266.161512                                        | 0.412181303                              |
| 0.009823176                                                 | 301.1499148                                     | 530.0664395                                       | 0.282619162                              |
| 0.031014632                                                 | 230.3349057                                     | 192.9433962                                       | 0.488479263                              |
| 0.008501859                                                 | 382.0464505                                     | 995.6643295                                       | 0.433017078                              |
| 0.036924733                                                 | 315.3918129                                     | 143.6315789                                       | 0.47632312                               |
| 0.037574582                                                 | 163.972332                                      | 231.9565217                                       | 0.393468118                              |
| 0.059992767                                                 | 203.4019608                                     | 63.25490196                                       | 0.302670623                              |
| 0.040545537                                                 | 259.4647577                                     | 384.3612335                                       | 0.453093812                              |
| 0.009967524                                                 | 308.4918415                                     | 813.2331002                                       | 0.412698413                              |
| 0.009227905                                                 | 296.12286                                       | 948.0654582                                       | 0.320529374                              |
| 0.022880744                                                 | 262.4224422                                     | 257.1254125                                       | 0.366384522                              |
| 0.016445742                                                 | 237.8435754                                     | 502.2067039                                       | 0.362348178                              |
| 0.018568697                                                 | 173.2916074                                     | 651.0739687                                       | 0.338958534                              |
| 0.029795514                                                 | 179.3182898                                     | 382.9002375                                       | 0.376565295                              |
| 0.02719342                                                  | 229.7806122                                     | 340                                               | 0.430296378                              |
| 0.013964311                                                 | 221.3422645                                     | 1059.496111                                       | 0.166546711                              |
| 0.043715524                                                 | 229.9358108                                     | 216.9256757                                       | 0.424068768                              |
| 0.028674634                                                 | 202.4662999                                     | 699.5392022                                       | 0.311749571                              |
| 0.04965225                                                  | 255.2653061                                     | 198.5183673                                       | 0.420962199                              |
| 0.022317509                                                 | 160.9855072                                     | 587.9307568                                       | 0.221706533                              |
| 0.010712132                                                 | 251.6325549                                     | 1331.803571                                       | 0.278713629                              |
| 0.020085125                                                 | 247.3198263                                     | 605.1244573                                       | 0.401744186                              |
| 0.020003041                                                 | 208.4925214                                     | 872.3269231                                       | 0.3427316                                |
| 0.037016961                                                 | 353.5660377                                     | 156.2735849                                       | 0.440748441                              |
| 0.020706143                                                 | 204.9208145                                     | 411.158371                                        | 0.367109635                              |
| 0.013815093                                                 | 298.2337165                                     | 247.3754789                                       | 0.376080692                              |
| 0.005717297                                                 | 379.3782383                                     | 701.5466321                                       | 0.222735141                              |
| 0.015629551                                                 | 224.7654321                                     | 532.1428571                                       | 0.395673412                              |
| 0.013806479                                                 | 254.168                                         | 697.944                                           | 0.424929178                              |
| 0.010102768                                                 | 276.950495                                      | 666.2475248                                       | 0.278127459                              |
| 0.0094831                                                   | 252.1652739                                     | 1031.982358                                       | 0.338785782                              |
| 0.018393112                                                 | 198.6010576                                     | 1621.975323                                       | 0.287015177                              |
| 0.011818543                                                 | 266.9960682                                     | 699.8545216                                       | 0.375307427                              |
| 0.079339895                                                 | 410.25                                          | 42.03333333                                       | 0.576923077                              |
| 0.023031899                                                 | 275.9622642                                     | 135.1257862                                       | 0.478915663                              |
| 0.007780255                                                 | 294.8505747                                     | 624.1494253                                       | 0.344554455                              |
| 0.010028875                                                 | 282.1974585                                     | 979.9462366                                       | 0.355208333                              |
| 0.015401459                                                 | 235.2719704                                     | 1013.26642                                        | 0.322301729                              |
| 0.022421008                                                 | 272.4299674                                     | 240.4071661                                       | 0.367664671                              |
| 0.013292786                                                 | 250.440281                                      | 398.0538642                                       | 0.407054337                              |
| 0.030332143                                                 | 198.108742                                      | 412.8379531                                       | 0.318181818                              |
| 0.035610783                                                 | 245.7192982                                     | 361.0050125                                       | 0.418677859                              |
| 0.017638625                                                 | 285.488255                                      | 533.6543624                                       | 0.362971985                              |
| 0.019022032                                                 | 333.7899761                                     | 363.2959427                                       | 0.408780488                              |
| 0.012672969                                                 | 256.7107843                                     | 713.4142157                                       | 0.434504792                              |
| 0.023011605                                                 | 128.8865478                                     | 611.0291734                                       | 0.276929982                              |
| 0.009029125                                                 | 336.1563981                                     | 1422.911137                                       | 0.395686826                              |
| 0.021703704                                                 | 181.0766129                                     | 234.3951613                                       | 0.425385935                              |
| 0.09731658                                                  | 475.7931034                                     | 34.82758621                                       | 0.432835821                              |
| 0.025470391                                                 | 260.8232323                                     | 154.3131313                                       | 0.398390342                              |
| 0.009952058                                                 | 266.290718                                      | 1076.024518                                       | 0.333528037                              |
| 0.02067135                                                  | 178.4631579                                     | 277.1122807                                       | 0.344619105                              |
| 0.005327956                                                 | 410.2898914                                     | 1092.054302                                       | 0.313268778                              |
| 0.045133232                                                 | 179.2535885                                     | 186.3779904                                       | 0.353637902                              |
| 0.016451099                                                 | 192.2093541                                     | 1297.927988                                       | 0.206500077                              |
| 0.026565077                                                 | 310.1289593                                     | 369.239819                                        | 0.502844141                              |
| 0.019128416                                                 | 380.9833984                                     | 751.2578125                                       | 0.466940264                              |
| 0.036148821                                                 | 355.6060071                                     | 391.2155477                                       | 0.437741686                              |
| 0.019809385                                                 | 252.2852234                                     | 262.5463918                                       | 0.357493857                              |
| 0.008331025                                                 | 367.355102                                      | 239.0734694                                       | 0.278093076                              |
| 0.012750086                                                 | 255.1188725                                     | 752.6691176                                       | 0.385087305                              |
| 0.011921142                                                 | 283.018595                                      | 1778.946281                                       | 0.353413655                              |
| 0.011185799                                                 | 216.3072848                                     | 706.6556291                                       | 0.24433657                               |
| 0.004389899                                                 | 531.1019678                                     | 537.4329159                                       | 0.204686928                              |
| 0.057107379                                                 | 200.4563107                                     | 93.48543689                                       | 0.474654378                              |
| 0.016794768                                                 | 317.2121711                                     | 543.8026316                                       | 0.391500322                              |
| 0.030567899                                                 | 285.2111111                                     | 139.8777778                                       | 0.456852792                              |
| 0.005620259                                                 | 384.1355634                                     | 1068.15669                                        | 0.355333125                              |
| 0.014981205                                                 | 239.6735751                                     | 181.373057                                        | 0.432735426                              |
| 0.024427454                                                 | 265.5130435                                     | 732.5875776                                       | 0.400298359                              |
| 0.012700759                                                 | 275.6760949                                     | 970.1916058                                       | 0.360526316                              |
| 0.0191844                                                   | 218.2518519                                     | 372.4271605                                       | 0.358724535                              |
| 0.007442077                                                 | 277.1631464                                     | 1306.683904                                       | 0.265673375                              |
| 0.008500926                                                 | 258.3178017                                     | 1605.46356                                        | 0.249255509                              |
| 0.004041013                                                 | 451.4846185                                     | 2365.027966                                       | 0.272657952                              |
| 0.021600787                                                 | 318.0448343                                     | 416.3684211                                       | 0.459677419                              |
| 0.025697397                                                 | 253.0745192                                     | 356.9230769                                       | 0.372426141                              |
| 0.030868255                                                 | 216.9233871                                     | 228.8064516                                       | 0.406557377                              |
| 0.016332242                                                 | 305.7464986                                     | 594.2016807                                       | 0.404761905                              |
| 0.019917748                                                 | 247.7832031                                     | 895.2988281                                       | 0.359803233                              |
| 0.027338033                                                 | 306.9545455                                     | 223.6666667                                       | 0.523809524                              |
| 0.013116206                                                 | 387.2951049                                     | 606.7370629                                       | 0.533184191                              |
| 0.004408016                                                 | 503.7590051                                     | 1043.246998                                       | 0.417621777                              |
| 0.08993234                                                  | 382.0769231                                     | 44.2                                              | 0.448275862                              |
| 0.011855469                                                 | 210.547532                                      | 1047.053016                                       | 0.322618697                              |
| 0.006481693                                                 | 376.1430746                                     | 1001.590563                                       | 0.239956172                              |
| 0.016774189                                                 | 228.1588235                                     | 318.7117647                                       | 0.437017995                              |
| 0.014671255                                                 | 384.0838235                                     | 538.8235294                                       | 0.43814433                               |
| 0.059026538                                                 | 146.3968254                                     | 47.57142857                                       | 0.344262295                              |
| 0.037582817                                                 | 246.7592593                                     | 43.33333333                                       | 0.514285714                              |
| 0.004364183                                                 | 555.3755204                                     | 1072.70025                                        | 0.302138365                              |
| 0.011741961                                                 | 355.5875                                        | 314.05625                                         | 0.45325779                               |
| 0.010552372                                                 | 326.2408964                                     | 324.6190476                                       | 0.349315068                              |
| 0.021702913                                                 | 195.9526578                                     | 1109.988372                                       | 0.294376528                              |
| 0.012072565                                                 | 213.1496063                                     | 1442.314961                                       | 0.262487082                              |
| 0.031234671                                                 | 413.2108844                                     | 99.24489796                                       | 0.581027668                              |
| 0.007826006                                                 | 343.1533477                                     | 453.1079914                                       | 0.380756579                              |
| 0.088337023                                                 | 306.9726027                                     | 55.73972603                                       | 0.593495935                              |
| 0.041365422                                                 | 155.0763359                                     | 114.2366412                                       | 0.345646438                              |
| 0.022211674                                                 | 306.7532051                                     | 283.4423077                                       | 0.3866171                                |



| log.sigma.2.5.mm.3D_gldzm_IntensityVariabilityNormalized | log.sigma.2.5.mm.3D_gldzm_LowIntensitySmallDistanceEmphasis | log.sigma.2.5.mm.3D_gldzm_IntensityVariability |
|----------------------------------------------------------|-------------------------------------------------------------|------------------------------------------------|
| 0.047554941                                              | 0.012701938                                                 | 13.83848797                                    |
| 0.04938053                                               | 0.007399528                                                 | 28.98637138                                    |
| 0.052732289                                              | 0.010221807                                                 | 11.17924528                                    |
| 0.043414874                                              | 0.005830346                                                 | 49.5363716                                     |
| 0.04360316                                               | 0.009090868                                                 | 7.456140351                                    |
| 0.063319221                                              | 0.015583193                                                 | 16.01976285                                    |
| 0.063052672                                              | 0.007487392                                                 | 6.431372549                                    |
| 0.043548293                                              | 0.015241697                                                 | 19.77092511                                    |
| 0.044090719                                              | 0.009375613                                                 | 37.82983683                                    |
| 0.052026826                                              | 0.007110643                                                 | 51.66263847                                    |
| 0.061224934                                              | 0.006558631                                                 | 18.55115512                                    |
| 0.048365116                                              | 0.013790831                                                 | 25.97206704                                    |
| 0.057249059                                              | 0.015750314                                                 | 40.24608819                                    |
| 0.056042338                                              | 0.0162253                                                   | 23.59382423                                    |
| 0.051098501                                              | 0.010347592                                                 | 20.03061224                                    |
| 0.059124535                                              | 0.010463593                                                 | 68.40708729                                    |
| 0.051976808                                              | 0.011846976                                                 | 15.38513514                                    |
| 0.051968766                                              | 0.015544755                                                 | 37.78129298                                    |
| 0.045897543                                              | 0.020312193                                                 | 11.24489796                                    |
| 0.06164023                                               | 0.01843464                                                  | 38.27858293                                    |
| 0.056245094                                              | 0.008670707                                                 | 81.89285714                                    |
| 0.05158111                                               | 0.0082137                                                   | 35.64254703                                    |
| 0.056482395                                              | 0.011446631                                                 | 52.86752137                                    |
| 0.050195799                                              | 0.010054822                                                 | 10.64150943                                    |
| 0.057953359                                              | 0.010039057                                                 | 25.61538462                                    |
| 0.047459667                                              | 0.011262932                                                 | 12.38697318                                    |
| 0.054333673                                              | 0.005151117                                                 | 41.94559585                                    |
| 0.050897542                                              | 0.01329662                                                  | 28.85890653                                    |
| 0.048359111                                              | 0.010814447                                                 | 36.26933333                                    |
| 0.048600677                                              | 0.008799351                                                 | 34.36067893                                    |
| 0.059185519                                              | 0.008638817                                                 | 63.74280409                                    |
| 0.058167553                                              | 0.011851085                                                 | 99.00117509                                    |
| 0.04667545                                               | 0.009876862                                                 | 35.61336828                                    |
| 0.050555556                                              | 0.006969765                                                 | 3.033333333                                    |
| 0.045923816                                              | 0.017613003                                                 | 7.301886792                                    |
| 0.054292179                                              | 0.006764711                                                 | 37.78735632                                    |
| 0.046507072                                              | 0.008430619                                                 | 47.57673509                                    |
| 0.054532883                                              | 0.013640095                                                 | 58.95004625                                    |
| 0.052615943                                              | 0.009258319                                                 | 16.15309446                                    |
| 0.049004821                                              | 0.011169189                                                 | 20.92505855                                    |
| 0.051777361                                              | 0.017623029                                                 | 24.28358209                                    |
| 0.050144157                                              | 0.015686316                                                 | 20.0075188                                     |
| 0.050966173                                              | 0.0065821                                                   | 30.37583893                                    |
| 0.046325779                                              | 0.005373815                                                 | 19.41050119                                    |
| 0.051668829                                              | 0.008841983                                                 | 42.16176471                                    |
| 0.069571225                                              | 0.021492156                                                 | 42.92544571                                    |
| 0.046015504                                              | 0.006190057                                                 | 77.67417062                                    |
| 0.055183403                                              | 0.019522972                                                 | 13.68548387                                    |
| 0.049346017                                              | 0.007387858                                                 | 2.862068966                                    |
| 0.049280686                                              | 0.016513979                                                 | 9.757575758                                    |
| 0.053770845                                              | 0.007211695                                                 | 61.40630473                                    |
| 0.059526008                                              | 0.019934072                                                 | 16.96491228                                    |
| 0.048618483                                              | 0.004439445                                                 | 58.19632414                                    |
| 0.064490282                                              | 0.011510976                                                 | 13.4784689                                     |
| 0.056019894                                              | 0.0145339                                                   | 75.45879733                                    |
| 0.04182961                                               | 0.009115748                                                 | 18.48868778                                    |
| 0.04136467                                               | 0.005469586                                                 | 42.35742188                                    |
| 0.045824021                                              | 0.006182069                                                 | 25.93639576                                    |
| 0.049704184                                              | 0.013169702                                                 | 14.46391753                                    |
| 0.073752603                                              | 0.007956875                                                 | 18.06938776                                    |
| 0.050167003                                              | 0.009147003                                                 | 40.93627451                                    |
| 0.045118375                                              | 0.008413397                                                 | 87.34917355                                    |
| 0.060942941                                              | 0.009820546                                                 | 46.01192053                                    |
| 0.057811515                                              | 0.004149426                                                 | 32.31663685                                    |
| 0.058346687                                              | 0.016475104                                                 | 6.009708738                                    |
| 0.044034583                                              | 0.007489333                                                 | 26.77302632                                    |
| 0.048580247                                              | 0.012273207                                                 | 8.744444444                                    |
| 0.048113284                                              | 0.004939162                                                 | 54.65669014                                    |
| 0.060431153                                              | 0.01244718                                                  | 11.66321244                                    |
| 0.046666409                                              | 0.010267006                                                 | 37.56645963                                    |
| 0.049608064                                              | 0.007227171                                                 | 54.37043796                                    |
| 0.052607834                                              | 0.016026801                                                 | 21.30617284                                    |
| 0.054207961                                              | 0.006764416                                                 | 74.42753095                                    |
| 0.058508156                                              | 0.007476546                                                 | 97.94265233                                    |
| 0.049483249                                              | 0.003664019                                                 | 123.8565721                                    |
| 0.043914747                                              | 0.007185378                                                 | 22.52826511                                    |
| 0.052283654                                              | 0.010587959                                                 | 21.75                                          |
| 0.053167274                                              | 0.011049778                                                 | 13.18548387                                    |
| 0.049670849                                              | 0.006739707                                                 | 35.46498599                                    |
| 0.051025391                                              | 0.009955257                                                 | 52.25                                          |
| 0.042412764                                              | 0.015990653                                                 | 11.1969697                                     |
| 0.039589222                                              | 0.010554905                                                 | 28.30629371                                    |
| 0.044027609                                              | 0.003692447                                                 | 51.33619211                                    |
| 0.050887574                                              | 0.007545867                                                 | 3.307692308                                    |
| 0.058621231                                              | 0.010130286                                                 | 64.13162706                                    |
| 0.05574205                                               | 0.004339803                                                 | 73.24505327                                    |
| 0.054567474                                              | 0.014793241                                                 | 18.5294118                                     |
| 0.045432526                                              | 0.004579646                                                 | 30.89411765                                    |
| 0.068783069                                              | 0.026423996                                                 | 4.333333333                                    |
| 0.060356653                                              | 0.025557983                                                 | 3.259259259                                    |
| 0.045777145                                              | 0.003809356                                                 | 54.97835137                                    |
| 0.041757813                                              | 0.01044394                                                  | 13.3625                                        |
| 0.04991016                                               | 0.007926176                                                 | 17.81792717                                    |
| 0.053495546                                              | 0.015319934                                                 | 64.40863787                                    |
| 0.057703171                                              | 0.010271718                                                 | 87.93963255                                    |
| 0.035587024                                              | 0.013335085                                                 | 5.231292517                                    |
| 0.048248581                                              | 0.007636738                                                 | 22.33909287                                    |
| 0.054231563                                              | 0.008725666                                                 | 3.95890411                                     |
| 0.06310821                                               | 0.027572417                                                 | 8.267175573                                    |
| 0.040495562                                              | 0.018164946                                                 | 12.63461538                                    |

| log.sigma.2.5.mm.3D_gldzm_HighIntensityLargeDistanceEmphasis | log.sigma.2.5.mm.3D_gldzm_SmallDistanceEmphasis | log.sigma.2.5.mm.3D_gldzm_SumVariance | log.sigma.2.5.mm.3D_gldzm_Homogeneity1 |
|--------------------------------------------------------------|-------------------------------------------------|---------------------------------------|----------------------------------------|
| 288.1924399                                                  | 0.966494845                                     | 558.3014699                           | 0.306946056                            |
| 327.0562181                                                  | 0.961669506                                     | 679.2994753                           | 0.394977237                            |
| 254.4764151                                                  | 0.964622642                                     | 448.5081487                           | 0.302973205                            |
| 444.5311131                                                  | 0.948729185                                     | 1039.51884                            | 0.286515866                            |
| 348.005848                                                   | 0.934210526                                     | 812.0397276                           | 0.295590015                            |
| 174.2173913                                                  | 0.967391304                                     | 319.4717431                           | 0.329169741                            |
| 266.1372549                                                  | 0.808823529                                     | 565.2684194                           | 0.363035545                            |
| 287.3964758                                                  | 0.93722467                                      | 580.474986                            | 0.273390882                            |
| 328.2750583                                                  | 0.979895105                                     | 749.2319819                           | 0.294321498                            |
| 307.5276939                                                  | 0.982628399                                     | 650.6948234                           | 0.354677317                            |
| 300.3828383                                                  | 0.938118812                                     | 684.5566011                           | 0.322000788                            |
| 255.7206704                                                  | 0.974860335                                     | 497.5689171                           | 0.336011204                            |
| 184.8008535                                                  | 0.971194879                                     | 388.3310974                           | 0.344041863                            |
| 190.5415677                                                  | 0.964370546                                     | 377.9496465                           | 0.327740796                            |
| 256.7882653                                                  | 0.946428571                                     | 589.0289744                           | 0.307056025                            |
| 246.3509075                                                  | 0.966940363                                     | 470.4725479                           | 0.509503985                            |
| 280.5304054                                                  | 0.880912162                                     | 525.6489478                           | 0.298196887                            |
| 205.127923                                                   | 0.985557084                                     | 354.0830189                           | 0.355151779                            |
| 289.2326531                                                  | 0.920408163                                     | 563.4924339                           | 0.290979661                            |
| 169.4202899                                                  | 0.979468599                                     | 275.5069747                           | 0.433101265                            |
| 277.4498626                                                  | 0.966517857                                     | 534.7118539                           | 0.402625005                            |
| 273.4688857                                                  | 0.950072359                                     | 554.0566597                           | 0.306858923                            |
| 217.9188034                                                  | 0.973557692                                     | 389.8904263                           | 0.356175845                            |
| 475.4622642                                                  | 0.883254717                                     | 1005.16314                            | 0.291060578                            |
| 220.918552                                                   | 0.972850679                                     | 410.1390992                           | 0.363041873                            |
| 303.6360153                                                  | 0.979885057                                     | 589.0067626                           | 0.32040236                             |
| 440.6683938                                                  | 0.964054404                                     | 936.1548555                           | 0.42661783                             |
| 238.1516755                                                  | 0.976190476                                     | 417.4773483                           | 0.347493726                            |
| 272.028                                                      | 0.973                                           | 691.9708159                           | 0.305143054                            |
| 295.3069307                                                  | 0.977722772                                     | 599.9417551                           | 0.405039894                            |
| 262.5858867                                                  | 0.983983287                                     | 512.55407                             | 0.36473745                             |
| 211.7573443                                                  | 0.98193302                                      | 390.2756975                           | 0.393881599                            |
| 293.63827                                                    | 0.967562254                                     | 657.1976772                           | 0.307426892                            |
| 460.95                                                       | 0.8625                                          | 1138.852606                           | 0.253244945                            |
| 296.9056604                                                  | 0.938679245                                     | 675.3357578                           | 0.256063891                            |
| 330.829023                                                   | 0.959051724                                     | 797.6082341                           | 0.323976129                            |
| 293.886608                                                   | 0.983870968                                     | 582.7418278                           | 0.333357527                            |
| 254.2377428                                                  | 0.975716929                                     | 538.1748029                           | 0.352175304                            |
| 326.4495114                                                  | 0.907166124                                     | 763.6376088                           | 0.309892355                            |
| 265.9531616                                                  | 0.973653396                                     | 549.8058361                           | 0.318156843                            |
| 224.5138593                                                  | 0.952025586                                     | 411.0945169                           | 0.370313364                            |
| 256.839599                                                   | 0.962406015                                     | 544.9582357                           | 0.302961476                            |
| 306.7449664                                                  | 0.958473154                                     | 750.3288936                           | 0.30415633                             |
| 362.6229117                                                  | 0.946300716                                     | 782.7888703                           | 0.296471152                            |
| 291.9644608                                                  | 0.949448529                                     | 683.2572612                           | 0.298587097                            |
| 129.1491086                                                  | 0.996353323                                     | 191.5112859                           | 0.400157429                            |
| 410.6196682                                                  | 0.935574645                                     | 872.3787563                           | 0.30213926                             |
| 186.1935484                                                  | 0.978830645                                     | 341.5198796                           | 0.304203088                            |
| 592.0172414                                                  | 0.793103448                                     | 1342.722008                           | 0.285205813                            |
| 304.8080808                                                  | 0.90530303                                      | 639.5280193                           | 0.299862633                            |
| 277.8204904                                                  | 0.977670753                                     | 596.1622954                           | 0.35945848                             |
| 181.7578947                                                  | 0.989473684                                     | 390.650772                            | 0.324332208                            |
| 451.9264829                                                  | 0.965538847                                     | 1009.689508                           | 0.347585606                            |
| 185.7703349                                                  | 0.956937799                                     | 354.7578262                           | 0.341026556                            |
| 198.7505568                                                  | 0.986080178                                     | 368.491175                            | 0.4525934                              |
| 353.4049774                                                  | 0.932126697                                     | 761.1546284                           | 0.260967284                            |
| 482.2099609                                                  | 0.881347656                                     | 949.6565533                           | 0.259081245                            |
| 457.6961131                                                  | 0.856890459                                     | 1035.405135                           | 0.284318539                            |
| 265.9140893                                                  | 0.961340206                                     | 517.6420132                           | 0.348841912                            |
| 372.5591837                                                  | 0.990816327                                     | 987.2449355                           | 0.368074471                            |
| 272.3909314                                                  | 0.96969118                                      | 543.0472028                           | 0.314664569                            |
| 316.3780992                                                  | 0.968233471                                     | 671.5101293                           | 0.332800273                            |
| 231.589404                                                   | 0.975165563                                     | 472.816177                            | 0.420131773                            |
| 551.5277281                                                  | 0.985241503                                     | 1563.686767                           | 0.449726219                            |
| 205.2330097                                                  | 0.963592233                                     | 399.0934257                           | 0.310786764                            |
| 360.4753289                                                  | 0.958059211                                     | 745.432522                            | 0.305064038                            |
| 329.9111111                                                  | 0.904166667                                     | 675.5327767                           | 0.278841956                            |
| 406.0994718                                                  | 0.976892606                                     | 913.6336733                           | 0.317540525                            |
| 249.8082902                                                  | 0.976683938                                     | 514.6385634                           | 0.311835284                            |
| 281.0012422                                                  | 0.964596273                                     | 624.7882848                           | 0.311335155                            |
| 301.1377737                                                  | 0.95415146                                      | 594.5204139                           | 0.33089207                             |
| 231.0444444                                                  | 0.968518519                                     | 429.8287035                           | 0.320367886                            |
| 291.5841224                                                  | 0.981427531                                     | 586.1501701                           | 0.396763716                            |
| 269.5095579                                                  | 0.984318996                                     | 551.2955288                           | 0.410077216                            |
| 491.8545745                                                  | 0.978725529                                     | 1287.283482                           | 0.392720567                            |
| 371.711501                                                   | 0.921052632                                     | 836.8510555                           | 0.264832426                            |
| 291.75                                                       | 0.942307692                                     | 589.554615                            | 0.310294061                            |
| 225.2701613                                                  | 0.969758065                                     | 388.7076537                           | 0.305231319                            |
| 349.9481793                                                  | 0.930672269                                     | 757.2985138                           | 0.297166971                            |
| 277.7832031                                                  | 0.949462891                                     | 567.9075224                           | 0.325716491                            |
| 334.3181818                                                  | 0.9375                                          | 646.5386729                           | 0.256244069                            |
| 469.0545455                                                  | 0.938111888                                     | 1025.922925                           | 0.245731055                            |
| 585.7264151                                                  | 0.958190395                                     | 1455.166125                           | 0.303250752                            |
| 433.3538462                                                  | 0.85                                            | 1074.445253                           | 0.285702586                            |
| 219.5365631                                                  | 0.983546618                                     | 446.963756                            | 0.353308465                            |
| 571.0144597                                                  | 0.896583798                                     | 956.1683954                           | 0.397069539                            |
| 244.05                                                       | 0.975735294                                     | 429.0481171                           | 0.311734253                            |
| 449.8985294                                                  | 0.911764706                                     | 1045.276106                           | 0.271014556                            |
| 171.1587302                                                  | 0.892857143                                     | 370.1620463                           | 0.351800957                            |
| 269.4814815                                                  | 0.916666667                                     | 684.3204365                           | 0.275493251                            |
| 637.5395504                                                  | 0.957535387                                     | 1593.207518                           | 0.366247249                            |
| 357.10625                                                    | 0.99296875                                      | 718.1015569                           | 0.274148119                            |
| 356.7787115                                                  | 0.964285714                                     | 888.8946461                           | 0.37102402                             |
| 213.5739203                                                  | 0.969476744                                     | 408.8101746                           | 0.378430873                            |
| 225.8779528                                                  | 0.979330709                                     | 419.5024258                           | 0.388678507                            |
| 530.1088435                                                  | 0.846938776                                     | 1041.31361                            | 0.233547025                            |
| 350.3066955                                                  | 0.991900648                                     | 1049.978586                           | 0.317351458                            |
| 322.7945205                                                  | 0.897260274                                     | 786.3144389                           | 0.251818341                            |
| 166.8244275                                                  | 0.948473282                                     | 334.6967436                           | 0.343111046                            |
| 316.2435897                                                  | 0.963942308                                     | 616.5404874                           | 0.327524612                            |

| log.sigma.2.5.mm.3D_glcM_Homogeneity2 | log.sigma.2.5.mm.3D_glcM_ClusterShade | log.sigma.2.5.mm.3D_glcM_MaximumProbability | log.sigma.2.5.mm.3D_glcM_Idmn | log.sigma.2.5.mm.3D_glcM_SumVariance2 |
|---------------------------------------|---------------------------------------|---------------------------------------------|-------------------------------|---------------------------------------|
| 0.21886634                            | 262.96488                             | 0.013770403                                 | 0.961448303                   | 82.91404847                           |
| 0.323006831                           | 152.2872092                           | 0.049294526                                 | 0.976605233                   | 57.73568638                           |
| 0.214687799                           | 372.8575767                           | 0.016286842                                 | 0.967367544                   | 71.45604995                           |
| 0.19964547                            | 17.82933567                           | 0.009903556                                 | 0.967757749                   | 89.18423929                           |
| 0.203717734                           | 89.64783237                           | 0.018541227                                 | 0.96863166                    | 98.91427164                           |
| 0.239084763                           | 77.35230667                           | 0.017255323                                 | 0.95612405                    | 50.70865769                           |
| 0.276847177                           | -58.62800798                          | 0.033124771                                 | 0.97049487                    | 35.17486978                           |
| 0.185594695                           | 129.4558079                           | 0.011133862                                 | 0.953464951                   | 113.5521635                           |
| 0.206171197                           | 168.5243634                           | 0.008738111                                 | 0.966973476                   | 96.58753944                           |
| 0.271840904                           | 191.8897477                           | 0.019117472                                 | 0.980024834                   | 53.12556224                           |
| 0.233310371                           | -107.7486268                          | 0.014520716                                 | 0.960028705                   | 55.60146917                           |
| 0.250797478                           | 284.9914147                           | 0.01513507                                  | 0.966109733                   | 69.93562992                           |
| 0.255615058                           | 204.3987465                           | 0.013092635                                 | 0.972435195                   | 57.83495855                           |
| 0.238325541                           | 75.42895947                           | 0.013077547                                 | 0.966240128                   | 65.62575396                           |
| 0.215180651                           | 32.27423251                           | 0.014335687                                 | 0.960369918                   | 61.88737719                           |
| 0.454695567                           | 126.6198799                           | 0.138255452                                 | 0.98778345                    | 35.4869914                            |
| 0.208095925                           | 24.8320526                            | 0.012188354                                 | 0.959949659                   | 83.50198832                           |
| 0.272478697                           | 379.2649405                           | 0.015098324                                 | 0.969454545                   | 73.19837292                           |
| 0.2015468                             | 106.5060602                           | 0.011735774                                 | 0.955591922                   | 110.6328435                           |
| 0.363085602                           | 94.43425315                           | 0.044751882                                 | 0.972901278                   | 39.25871897                           |
| 0.326426748                           | 128.7669741                           | 0.044160839                                 | 0.978717839                   | 38.78442932                           |
| 0.215549931                           | 305.4829935                           | 0.010653273                                 | 0.971749036                   | 74.23876898                           |
| 0.271476222                           | 244.1251494                           | 0.020838064                                 | 0.969092923                   | 56.25572004                           |
| 0.199658336                           | -438.591336                           | 0.015709046                                 | 0.958326965                   | 82.96806241                           |
| 0.280462269                           | 179.0036202                           | 0.024968453                                 | 0.977808571                   | 43.42748518                           |
| 0.236494423                           | 323.061867                            | 0.018416082                                 | 0.964162661                   | 78.86962618                           |
| 0.35598577                            | 143.1821203                           | 0.06010519                                  | 0.985955676                   | 36.47538132                           |
| 0.263813145                           | 328.8650175                           | 0.023708273                                 | 0.96989369                    | 58.69530229                           |
| 0.219677623                           | -213.5197732                          | 0.012955496                                 | 0.958742728                   | 98.96739512                           |
| 0.333576108                           | 136.9358079                           | 0.053777225                                 | 0.983547512                   | 51.7408034                            |
| 0.282345191                           | 210.9654104                           | 0.022308804                                 | 0.974810236                   | 47.18326724                           |
| 0.315249518                           | 192.4199926                           | 0.037090793                                 | 0.975928193                   | 53.30528895                           |
| 0.221353505                           | 31.18895583                           | 0.010608635                                 | 0.97020666                    | 83.01898252                           |
| 0.166245237                           | -185.6400283                          | 0.030604791                                 | 0.946925192                   | 110.262621                            |
| 0.172663193                           | -201.2483637                          | 0.013256121                                 | 0.94016999                    | 106.0609752                           |
| 0.235663714                           | -43.50469163                          | 0.012529427                                 | 0.972325532                   | 69.82000401                           |
| 0.251697399                           | 355.233435                            | 0.016876617                                 | 0.975541669                   | 75.42376267                           |
| 0.26730871                            | 50.76495276                           | 0.014702907                                 | 0.970663251                   | 52.05190962                           |
| 0.221087212                           | -164.8134043                          | 0.015391235                                 | 0.966895945                   | 67.00605264                           |
| 0.231448651                           | 55.59770717                           | 0.013083967                                 | 0.964145825                   | 73.66270791                           |
| 0.289669548                           | 96.15714851                           | 0.019800289                                 | 0.968292969                   | 53.87468055                           |
| 0.213515885                           | -156.2944422                          | 0.011971859                                 | 0.963096617                   | 88.07024144                           |
| 0.216703363                           | 200.21923685                          | 0.014828057                                 | 0.963433665                   | 79.46311013                           |
| 0.209430791                           | 136.8333241                           | 0.012021201                                 | 0.962212502                   | 95.7467777                            |
| 0.207113315                           | -47.93694721                          | 0.010225289                                 | 0.964640673                   | 66.50810565                           |
| 0.322148582                           | 128.0098163                           | 0.026582536                                 | 0.971282134                   | 34.06385423                           |
| 0.213255793                           | 74.23559364                           | 0.010189951                                 | 0.971651592                   | 69.95966444                           |
| 0.213954321                           | 106.159554                            | 0.01224238                                  | 0.957191809                   | 69.61072844                           |
| 0.204310833                           | -787.4532891                          | 0.042012112                                 | 0.945802205                   | 101.6870402                           |
| 0.213542077                           | -262.5873066                          | 0.020679971                                 | 0.964480327                   | 103.6519955                           |
| 0.276228223                           | 161.5101828                           | 0.028519868                                 | 0.976068638                   | 56.30627418                           |
| 0.241028488                           | 16.68740541                           | 0.017882578                                 | 0.943780562                   | 78.75971174                           |
| 0.267446194                           | 219.8030684                           | 0.021826453                                 | 0.978855296                   | 65.9409655                            |
| 0.251460017                           | 20.87126092                           | 0.016944194                                 | 0.959754652                   | 51.96017495                           |
| 0.389732773                           | 150.4553218                           | 0.074549699                                 | 0.976237801                   | 51.22215267                           |
| 0.171962092                           | 67.16625709                           | 0.009682311                                 | 0.951310907                   | 106.5455331                           |
| 0.171463932                           | 38.96609679                           | 0.006929236                                 | 0.963713585                   | 112.8694788                           |
| 0.195679401                           | -465.9178305                          | 0.013444421                                 | 0.963059667                   | 89.63679094                           |
| 0.26492362                            | 107.5207043                           | 0.032334478                                 | 0.965832934                   | 64.8709926                            |
| 0.280445953                           | 8.671017274                           | 0.019351943                                 | 0.981438771                   | 41.0242534                            |
| 0.227320472                           | 339.6968824                           | 0.013799398                                 | 0.967580789                   | 79.38805303                           |
| 0.250424362                           | 369.5780731                           | 0.017275925                                 | 0.97698967                    | 82.49389465                           |
| 0.347080827                           | 84.41015483                           | 0.040714176                                 | 0.981232562                   | 38.06394414                           |
| 0.385278868                           | 58.44222032                           | 0.064504717                                 | 0.985409684                   | 36.95149262                           |
| 0.218359303                           | -37.35559802                          | 0.022613441                                 | 0.950363305                   | 69.6745256                            |
| 0.219135924                           | 286.431189                            | 0.018637548                                 | 0.97404711                    | 81.73990575                           |
| 0.188822177                           | -240.7333445                          | 0.013763494                                 | 0.955169998                   | 85.22092799                           |
| 0.233005852                           | 227.8957779                           | 0.01106901                                  | 0.97173774                    | 82.90195708                           |
| 0.22285393                            | 35.85089505                           | 0.017539763                                 | 0.956301833                   | 70.44888326                           |
| 0.227061275                           | 235.790327                            | 0.012236434                                 | 0.966463813                   | 81.19258999                           |
| 0.24655433                            | 271.4095385                           | 0.012854616                                 | 0.964321337                   | 78.21333015                           |
| 0.232812205                           | 226.3973022                           | 0.013596992                                 | 0.963521471                   | 78.67983302                           |
| 0.322062368                           | 220.3260953                           | 0.030065682                                 | 0.975641699                   | 53.05983834                           |
| 0.336614157                           | 153.311179                            | 0.035826959                                 | 0.977453396                   | 44.61616848                           |
| 0.318058284                           | 214.3254176                           | 0.035148157                                 | 0.985345087                   | 50.41902109                           |
| 0.175547122                           | -123.8003966                          | 0.010492066                                 | 0.956642715                   | 102.1470075                           |
| 0.222306461                           | 52.4082954                            | 0.011316683                                 | 0.962282204                   | 72.24112422                           |
| 0.215856052                           | 419.2432519                           | 0.017784213                                 | 0.953976792                   | 78.72973434                           |
| 0.208688341                           | 100.4102053                           | 0.010502295                                 | 0.960929654                   | 80.61502102                           |
| 0.241405627                           | 164.8693702                           | 0.014930574                                 | 0.971438349                   | 69.70383155                           |
| 0.166592815                           | 213.1460001                           | 0.012109753                                 | 0.951841192                   | 107.9779733                           |
| 0.156341155                           | -38.81248142                          | 0.007292979                                 | 0.955767505                   | 118.2471909                           |
| 0.21892528                            | 83.77223662                           | 0.013350035                                 | 0.973132529                   | 90.07251726                           |
| 0.197557439                           | -555.9386459                          | 0.029117639                                 | 0.951314122                   | 96.50375172                           |
| 0.268575798                           | 146.6397243                           | 0.015315505                                 | 0.970291738                   | 55.85968222                           |
| 0.320304932                           | 200.8487275                           | 0.041797707                                 | 0.988157462                   | 42.39823631                           |
| 0.222195231                           | 353.0748963                           | 0.017989379                                 | 0.96078397                    | 80.19036567                           |
| 0.18260506                            | -286.0544087                          | 0.010715309                                 | 0.957029448                   | 106.749988                            |
| 0.266056253                           | -29.73564347                          | 0.031479473                                 | 0.952112979                   | 41.06833414                           |
| 0.188406631                           | -330.1994059                          | 0.035766156                                 | 0.924619768                   | 79.68865931                           |
| 0.289967114                           | 130.8736657                           | 0.035262491                                 | 0.979718128                   | 73.87545122                           |
| 0.185583597                           | 549.4441256                           | 0.011332932                                 | 0.964220394                   | 93.85576154                           |
| 0.292763555                           | 9.68874078                            | 0.069434147                                 | 0.969512954                   | 54.83509874                           |
| 0.299604311                           | 126.2646018                           | 0.026412664                                 | 0.97424636                    | 51.4846998                            |
| 0.30961591                            | 103.324964                            | 0.019542389                                 | 0.977118258                   | 45.34810408                           |
| 0.148815085                           | 499.4275938                           | 0.013970041                                 | 0.944489198                   | 181.1856471                           |
| 0.22750524                            | -129.4123792                          | 0.017416818                                 | 0.971308512                   | 61.36275819                           |
| 0.161359596                           | -402.7651329                          | 0.021207528                                 | 0.940916076                   | 108.476435                            |
| 0.251580594                           | 12.35449471                           | 0.023750912                                 | 0.965369375                   | 58.59401158                           |
| 0.24598646                            | 472.3439126                           | 0.021138545                                 | 0.968842083                   | 78.35894199                           |

| log.sigma.2.5.mm.3D_glc_m_Contrast | log.sigma.2.5.mm.3D_glc_m_DifferenceEntropy | log.sigma.2.5.mm.3D_glc_m_InverseVariance | log.sigma.2.5.mm.3D_glc_m_Entropy | log.sigma.2.5.mm.3D_glc_m_Dissimilarity |
|------------------------------------|---------------------------------------------|-------------------------------------------|-----------------------------------|-----------------------------------------|
| 36.88742904                        | 3.640364387                                 | 0.223665149                               | 8.200789846                       | 4.618904877                             |
| 28.24105692                        | 3.396853514                                 | 0.293589994                               | 7.817019354                       | 3.663989053                             |
| 37.25843635                        | 3.606639934                                 | 0.228088296                               | 7.736387787                       | 4.647755703                             |
| 49.09229097                        | 3.859104755                                 | 0.203814507                               | 8.821831783                       | 5.324600997                             |
| 35.59207859                        | 3.583066478                                 | 0.207261606                               | 7.852219663                       | 4.631854537                             |
| 24.29440095                        | 3.368617753                                 | 0.243828369                               | 7.715560863                       | 3.840774152                             |
| 18.91777669                        | 3.150488823                                 | 0.284779115                               | 6.967277152                       | 3.288683724                             |
| 51.40354664                        | 3.883407317                                 | 0.189826653                               | 8.656390369                       | 5.564648661                             |
| 42.49902505                        | 3.770319006                                 | 0.206801051                               | 8.734148786                       | 4.98789845                              |
| 26.52534466                        | 3.434414481                                 | 0.272593618                               | 7.966274718                       | 3.767021912                             |
| 28.16558736                        | 3.461892506                                 | 0.234845266                               | 7.810551244                       | 4.119490525                             |
| 30.20730057                        | 3.502562912                                 | 0.257560748                               | 8.147659583                       | 4.065229304                             |
| 22.14573143                        | 3.314709862                                 | 0.262470776                               | 7.944733569                       | 3.598628754                             |
| 25.39922264                        | 3.402446903                                 | 0.247102407                               | 7.960832483                       | 3.899884021                             |
| 30.49646362                        | 3.530950036                                 | 0.22472358                                | 8.119594583                       | 4.285959859                             |
| 15.48444981                        | 2.898846803                                 | 0.34731563                                | 6.76872553                        | 2.396551197                             |
| 35.53431431                        | 3.594094697                                 | 0.215723627                               | 8.131738684                       | 4.631091407                             |
| 26.94057149                        | 3.433665524                                 | 0.265328939                               | 8.11115279                        | 3.810207274                             |
| 43.15929793                        | 3.736303091                                 | 0.19528692                                | 8.294594033                       | 5.04593648                              |
| 16.18364105                        | 3.073804201                                 | 0.326949673                               | 7.381658082                       | 2.811265124                             |
| 19.62975757                        | 3.24068315                                  | 0.29835352                                | 7.553802604                       | 3.158074072                             |
| 31.85939786                        | 3.564026174                                 | 0.223465192                               | 8.316998059                       | 4.352044144                             |
| 23.44430694                        | 3.358441443                                 | 0.268581754                               | 7.936101064                       | 3.611193799                             |
| 40.25925746                        | 3.701496692                                 | 0.196537862                               | 7.999388881                       | 4.886600825                             |
| 25.12703714                        | 3.372212756                                 | 0.278111515                               | 7.567887874                       | 3.620244964                             |
| 42.19019929                        | 3.706092162                                 | 0.23048724                                | 8.101147109                       | 4.742233046                             |
| 18.43389442                        | 3.16808025                                  | 0.31595039                                | 7.327774471                       | 2.971016314                             |
| 28.62557458                        | 3.471102534                                 | 0.267417962                               | 7.854474589                       | 3.903355049                             |
| 42.65404972                        | 3.723090031                                 | 0.221697306                               | 8.409830591                       | 4.910318402                             |
| 25.7323934                         | 3.349728818                                 | 0.299728364                               | 7.727686515                       | 3.467605745                             |
| 23.40347922                        | 3.358202606                                 | 0.2789888                                 | 7.778076481                       | 3.553082941                             |
| 19.28499461                        | 3.229708173                                 | 0.287843915                               | 7.812461853                       | 3.201357855                             |
| 40.37195279                        | 3.719386834                                 | 0.225390784                               | 8.509066545                       | 4.781559915                             |
| 63.73026958                        | 3.80571093                                  | 0.179502858                               | 6.628696247                       | 6.210641933                             |
| 52.71253529                        | 3.835580205                                 | 0.164086665                               | 7.987466471                       | 5.641744553                             |
| 29.22886801                        | 3.505285544                                 | 0.244233543                               | 8.20068181                        | 4.11119669                              |
| 38.66839896                        | 3.671596433                                 | 0.241429559                               | 8.315218464                       | 4.535780458                             |
| 23.76224149                        | 3.383116486                                 | 0.26790367                                | 8.026215401                       | 3.657949727                             |
| 32.79837894                        | 3.47693546                                  | 0.224744438                               | 8.023213823                       | 4.434611759                             |
| 33.98156972                        | 3.597854606                                 | 0.236003015                               | 8.238782361                       | 4.409687914                             |
| 24.57327653                        | 3.353551239                                 | 0.288572146                               | 7.882703876                       | 3.55496616                              |
| 35.08156959                        | 3.623713697                                 | 0.225946174                               | 8.30596952                        | 4.546038115                             |
| 36.84742905                        | 3.634521875                                 | 0.220888163                               | 8.308219132                       | 4.675073795                             |
| 44.18468166                        | 3.768816624                                 | 0.212088705                               | 8.4919057                         | 5.021317031                             |
| 33.17503148                        | 3.597792785                                 | 0.217729992                               | 8.350638896                       | 4.498933527                             |
| 16.97052777                        | 3.122266952                                 | 0.308615415                               | 7.23406813                        | 3.00581127                              |
| 38.33615096                        | 3.706347237                                 | 0.218206426                               | 8.5822161                         | 4.704386728                             |
| 32.95735821                        | 3.568207371                                 | 0.220523694                               | 7.979826975                       | 4.66598226                              |
| 61.98750919                        | 3.829367646                                 | 0.195880868                               | 6.645829746                       | 5.943684866                             |
| 43.48864358                        | 3.743619944                                 | 0.210047858                               | 8.013655792                       | 5.005718763                             |
| 25.16941603                        | 3.415461241                                 | 0.261548659                               | 8.042125099                       | 3.706647337                             |
| 35.69455393                        | 3.583594414                                 | 0.242815906                               | 7.827806836                       | 4.484257193                             |
| 33.04052412                        | 3.560967102                                 | 0.258698669                               | 8.271852922                       | 4.187905551                             |
| 22.2408315                         | 3.317407979                                 | 0.266638199                               | 7.697822134                       | 3.626982694                             |
| 21.16529399                        | 3.152183444                                 | 0.32648458                                | 7.496729289                       | 2.9964958                               |
| 57.85988107                        | 3.95601176                                  | 0.177959805                               | 6.675665744                       | 5.898029118                             |
| 61.76416939                        | 3.963762616                                 | 0.173517313                               | 8.975691961                       | 6.087101275                             |
| 48.66402819                        | 3.816009186                                 | 0.201192699                               | 8.484569224                       | 5.276430022                             |
| 28.30130973                        | 3.482670495                                 | 0.251547635                               | 7.98454531                        | 3.933726058                             |
| 16.75358575                        | 3.118193087                                 | 0.283666226                               | 7.395502875                       | 3.125852534                             |
| 34.89195861                        | 3.627618166                                 | 0.233943489                               | 8.318421737                       | 4.456759677                             |
| 38.75047296                        | 3.675802603                                 | 0.243329619                               | 8.547288782                       | 4.489464013                             |
| 17.09955925                        | 3.122663853                                 | 0.313208912                               | 7.41325818                        | 2.934596515                             |
| 19.22360118                        | 3.112782808                                 | 0.262822135                               | 7.163449284                       | 2.915577473                             |
| 30.86836391                        | 3.479160995                                 | 0.216906667                               | 7.341088705                       | 4.285610887                             |
| 43.55535733                        | 3.748306024                                 | 0.223750297                               | 8.425934845                       | 4.901217822                             |
| 46.83278975                        | 3.765603381                                 | 0.19980576                                | 7.965391059                       | 5.24710039                              |
| 38.03527028                        | 3.681045329                                 | 0.228873936                               | 8.498257668                       | 4.638035812                             |
| 31.32846838                        | 3.525443084                                 | 0.231294009                               | 7.752100236                       | 4.32822924                              |
| 41.0134293                         | 3.723959683                                 | 0.230060492                               | 8.47485156                        | 4.793968295                             |
| 34.36003232                        | 3.578555698                                 | 0.247196824                               | 8.341737094                       | 4.315288091                             |
| 32.34358388                        | 3.567149243                                 | 0.233527157                               | 8.186116444                       | 4.314495575                             |
| 24.40140554                        | 3.347691865                                 | 0.28832007                                | 7.853469742                       | 3.458856605                             |
| 19.5613407                         | 3.205951545                                 | 0.314099421                               | 7.62536005                        | 3.103403724                             |
| 25.1822302                         | 3.364220107                                 | 0.298217528                               | 7.85057189                        | 3.481014461                             |
| 53.90511028                        | 3.886772077                                 | 0.183565295                               | 6.650737587                       | 5.705080126                             |
| 35.91505253                        | 3.631776022                                 | 0.213388876                               | 8.262005669                       | 4.566746251                             |
| 36.29338315                        | 3.634800042                                 | 0.218517759                               | 7.927101949                       | 4.598488031                             |
| 39.75243967                        | 3.680423752                                 | 0.214141376                               | 8.444940535                       | 4.840110529                             |
| 34.30346929                        | 3.610718026                                 | 0.243211428                               | 8.300294389                       | 4.38505932                              |
| 56.74005059                        | 3.898045405                                 | 0.177020984                               | 8.300851297                       | 5.903428756                             |
| 65.48304257                        | 4.059691543                                 | 0.1596234                                 | 8.941210692                       | 6.338564249                             |
| 47.29829076                        | 3.817062927                                 | 0.219291495                               | 8.705509766                       | 5.110373192                             |
| 47.79815159                        | 3.674636053                                 | 0.191815656                               | 6.927277692                       | 5.304143025                             |
| 24.16225581                        | 3.374379207                                 | 0.266518428                               | 7.981810142                       | 3.670024756                             |
| 21.09146163                        | 3.269848011                                 | 0.297469652                               | 7.622515392                       | 3.244351544                             |
| 32.45398224                        | 3.574478788                                 | 0.22373031                                | 8.034731251                       | 4.381780824                             |
| 49.82001505                        | 3.848460665                                 | 0.187099171                               | 8.652919033                       | 5.530844796                             |
| 22.25428487                        | 3.131167438                                 | 0.263609422                               | 6.806972652                       | 3.605609787                             |
| 49.60741294                        | 3.659502826                                 | 0.191881062                               | 6.4060902                         | 5.501425012                             |
| 33.63307678                        | 3.551245288                                 | 0.267761634                               | 8.276608236                       | 4.093656293                             |
| 55.49969081                        | 3.925350468                                 | 0.186242332                               | 8.296037883                       | 5.649511993                             |
| 30.9847952                         | 3.520881406                                 | 0.249205215                               | 7.806680201                       | 3.978466825                             |
| 24.20283349                        | 3.363013809                                 | 0.284359852                               | 7.931056933                       | 3.524886883                             |
| 19.7099252                         | 3.239849441                                 | 0.298186247                               | 7.761395746                       | 3.217998708                             |
| 89.56339855                        | 4.113030269                                 | 0.154706153                               | 7.924378557                       | 7.333716583                             |
| 30.59435617                        | 3.529460976                                 | 0.237475314                               | 8.102353441                       | 4.199801668                             |
| 54.85877198                        | 3.72965115                                  | 0.173081877                               | 6.944225078                       | 5.871111796                             |
| 20.42018528                        | 3.244738545                                 | 0.245138585                               | 7.440841597                       | 3.528279566                             |
| 46.35989342                        | 3.731473239                                 | 0.245218439                               | 8.02004829                        | 4.800884124                             |

| log.sigma.2.5.mm.3D_glmc_DifferenceVariance | log.sigma.2.5.mm.3D_glmc_ldn | log.sigma.2.5.mm.3D_glmc_ldm | log.sigma.2.5.mm.3D_glmc_Correlation | log.sigma.2.5.mm.3D_glmc_Autocorrelation |
|---------------------------------------------|------------------------------|------------------------------|--------------------------------------|------------------------------------------|
| 14.78808234                                 | 0.87345572                   | 0.21886634                   | 0.384076104                          | 192.7269529                              |
| 14.21857088                                 | 0.908907631                  | 0.323006831                  | 0.348112453                          | 229.4117572                              |
| 15.03828257                                 | 0.882522846                  | 0.214687799                  | 0.316881338                          | 156.6765054                              |
| 19.8570858                                  | 0.883521046                  | 0.19964547                   | 0.297525517                          | 335.4057303                              |
| 13.19160231                                 | 0.882033398                  | 0.203717734                  | 0.472616047                          | 269.6894877                              |
| 9.157607715                                 | 0.86262785                   | 0.239084763                  | 0.35355642                           | 118.7456198                              |
| 7.572279152                                 | 0.888169757                  | 0.276847177                  | 0.30830772                           | 193.1145636                              |
| 19.57647627                                 | 0.85986729                   | 0.185594695                  | 0.379061098                          | 197.1920089                              |
| 17.0080815                                  | 0.881393572                  | 0.206171197                  | 0.391623369                          | 251.3065057                              |
| 11.99776178                                 | 0.909552085                  | 0.271840904                  | 0.339042544                          | 221.2967936                              |
| 10.47982265                                 | 0.869102381                  | 0.233310371                  | 0.330717985                          | 230.5640709                              |
| 13.05381426                                 | 0.883645257                  | 0.250797478                  | 0.395682214                          | 175.0304404                              |
| 8.692840098                                 | 0.890322099                  | 0.255615058                  | 0.444386072                          | 142.1124619                              |
| 9.751857095                                 | 0.878738898                  | 0.238325541                  | 0.442391425                          | 138.1574714                              |
| 11.65812725                                 | 0.86886546                   | 0.215180651                  | 0.343029246                          | 202.7399644                              |
| 9.535083265                                 | 0.940040216                  | 0.454695567                  | 0.396392819                          | 164.1578259                              |
| 12.87769204                                 | 0.86858662                   | 0.208095925                  | 0.403828312                          | 182.5869188                              |
| 11.80430151                                 | 0.889941898                  | 0.272478697                  | 0.460457535                          | 130.3430124                              |
| 16.49875771                                 | 0.863686195                  | 0.2015468                    | 0.438760757                          | 193.1935971                              |
| 8.024258942                                 | 0.900873191                  | 0.363085602                  | 0.415228603                          | 105.7746354                              |
| 9.462848338                                 | 0.90935226                   | 0.326426748                  | 0.327770976                          | 185.5936989                              |
| 12.32196455                                 | 0.888174594                  | 0.215549931                  | 0.402713494                          | 192.6438431                              |
| 10.00368142                                 | 0.887461466                  | 0.271476222                  | 0.411846001                          | 142.0907289                              |
| 15.71251023                                 | 0.866912869                  | 0.199658336                  | 0.352927803                          | 324.5875872                              |
| 11.67924576                                 | 0.905927603                  | 0.280462269                  | 0.268062618                          | 146.2688369                              |
| 18.93370126                                 | 0.882271399                  | 0.236494423                  | 0.307658165                          | 200.425228                               |
| 9.407571987                                 | 0.927282423                  | 0.358598577                  | 0.332469529                          | 302.4687312                              |
| 12.98222898                                 | 0.891072198                  | 0.263813145                  | 0.344777126                          | 148.9993691                              |
| 17.41227176                                 | 0.871274483                  | 0.219677623                  | 0.398949317                          | 232.4288241                              |
| 13.35647577                                 | 0.922908467                  | 0.333576108                  | 0.340769832                          | 205.5698802                              |
| 10.47942384                                 | 0.899030772                  | 0.282345191                  | 0.336755974                          | 178.9306112                              |
| 8.63363022                                  | 0.902035108                  | 0.315249518                  | 0.467534947                          | 143.1773962                              |
| 16.88817002                                 | 0.88875181                   | 0.221353505                  | 0.351062208                          | 222.7744063                              |
| 23.66126372                                 | 0.850837562                  | 0.166245237                  | 0.279968212                          | 351.2111591                              |
| 19.46068864                                 | 0.841917264                  | 0.172663193                  | 0.341141768                          | 224.4354094                              |
| 11.80033851                                 | 0.891020046                  | 0.235663714                  | 0.413380755                          | 266.3666809                              |
| 17.49016569                                 | 0.901524255                  | 0.251697399                  | 0.327666748                          | 199.5719015                              |
| 10.11709974                                 | 0.889548294                  | 0.26730871                   | 0.372691963                          | 188.1511067                              |
| 11.28346226                                 | 0.880245112                  | 0.221087212                  | 0.3488422                            | 254.7842259                              |
| 14.0562059                                  | 0.878375414                  | 0.231448651                  | 0.369551019                          | 190.7175714                              |
| 11.60605976                                 | 0.890290043                  | 0.289669548                  | 0.373255602                          | 148.5493405                              |
| 13.85174598                                 | 0.874617613                  | 0.213515885                  | 0.43113241                           | 189.6294558                              |
| 13.75854468                                 | 0.875198802                  | 0.216703363                  | 0.370233477                          | 250.769706                               |
| 17.93495144                                 | 0.8752112613                 | 0.209430791                  | 0.372573591                          | 260.2773519                              |
| 12.42070669                                 | 0.874952172                  | 0.207113315                  | 0.337400768                          | 231.3125875                              |
| 7.616443526                                 | 0.893775651                  | 0.322148582                  | 0.333353484                          | 76.76612172                              |
| 15.7002747                                  | 0.88980757                   | 0.213255793                  | 0.297728512                          | 287.0256862                              |
| 12.41155152                                 | 0.864485647                  | 0.213954321                  | 0.356509866                          | 124.253405                               |
| 24.67334007                                 | 0.854168832                  | 0.204310833                  | 0.25732398                           | 410.3552494                              |
| 17.52844257                                 | 0.878481749                  | 0.213542077                  | 0.413454178                          | 215.9396706                              |
| 11.06320222                                 | 0.900924803                  | 0.276228223                  | 0.383406532                          | 205.7677327                              |
| 14.57467586                                 | 0.85261732                   | 0.241028488                  | 0.374878468                          | 138.782751                               |
| 14.84074208                                 | 0.90792635                   | 0.267446194                  | 0.335759048                          | 327.4354619                              |
| 8.805597273                                 | 0.869323755                  | 0.251460017                  | 0.403091867                          | 130.6934691                              |
| 11.73543103                                 | 0.913214754                  | 0.389732773                  | 0.417953651                          | 134.8336005                              |
| 22.16258617                                 | 0.856898494                  | 0.171962092                  | 0.303710801                          | 251.0614384                              |
| 21.76574195                                 | 0.874748267                  | 0.171463932                  | 0.302730043                          | 307.0766052                              |
| 19.30821379                                 | 0.876224866                  | 0.195679401                  | 0.307995535                          | 333.0225847                              |
| 12.479758                                   | 0.88337417                   | 0.26492362                   | 0.392303265                          | 181.3311317                              |
| 6.671575633                                 | 0.908302118                  | 0.280445953                  | 0.422081076                          | 319.4011247                              |
| 14.52213314                                 | 0.883831272                  | 0.227320472                  | 0.390633374                          | 188.3285267                              |
| 17.95820047                                 | 0.904633863                  | 0.250424362                  | 0.367167551                          | 227.6579442                              |
| 8.133046236                                 | 0.914944163                  | 0.347080827                  | 0.383148046                          | 167.2057937                              |
| 10.3468489                                  | 0.92926245                   | 0.385278868                  | 0.31837133                           | 479.2184418                              |
| 12.07502671                                 | 0.855805978                  | 0.218359303                  | 0.387456782                          | 142.4822864                              |
| 18.66037965                                 | 0.896523499                  | 0.219135924                  | 0.313462424                          | 248.0925235                              |
| 18.20088667                                 | 0.863152776                  | 0.188821777                  | 0.295202225                          | 225.02022                                |
| 15.90169629                                 | 0.891576656                  | 0.233005852                  | 0.375202042                          | 300.0898029                              |
| 12.12919098                                 | 0.863925613                  | 0.22285393                   | 0.384985022                          | 178.8747769                              |
| 17.33784782                                 | 0.883230854                  | 0.227061275                  | 0.334397676                          | 212.59747                                |
| 14.63423812                                 | 0.881530534                  | 0.24655433                   | 0.391861415                          | 204.4013475                              |
| 13.21500426                                 | 0.876898564                  | 0.232812205                  | 0.417878507                          | 153.5203485                              |
| 11.99653577                                 | 0.90549088                   | 0.322062368                  | 0.374192943                          | 202.1247721                              |
| 9.676272692                                 | 0.908444233                  | 0.336614157                  | 0.388928022                          | 191.5686274                              |
| 12.77677215                                 | 0.925646899                  | 0.318058284                  | 0.338527069                          | 405.0754658                              |
| 19.61301497                                 | 0.863854573                  | 0.175547122                  | 0.315010442                          | 274.188246                               |
| 14.26330898                                 | 0.874546102                  | 0.222306461                  | 0.338786099                          | 202.3039102                              |
| 14.52689551                                 | 0.862202658                  | 0.215856052                  | 0.367607939                          | 138.1342562                              |
| 15.13813043                                 | 0.871780345                  | 0.208688341                  | 0.344669836                          | 252.8531239                              |
| 14.55835623                                 | 0.891459549                  | 0.241405627                  | 0.343500572                          | 195.9029523                              |
| 20.51811991                                 | 0.856246524                  | 0.166592815                  | 0.31329008                           | 215.3539622                              |
| 24.33674756                                 | 0.861418272                  | 0.156341155                  | 0.292634141                          | 329.1539874                              |
| 20.2620477                                  | 0.895162754                  | 0.21892528                   | 0.317844706                          | 455.7195688                              |
| 18.40483158                                 | 0.858347962                  | 0.197557439                  | 0.348942682                          | 338.2204452                              |
| 10.15354688                                 | 0.889413724                  | 0.268575798                  | 0.393338237                          | 159.9805234                              |
| 10.27383841                                 | 0.931206095                  | 0.320304932                  | 0.340608268                          | 309.5823325                              |
| 12.80639832                                 | 0.871012774                  | 0.222195231                  | 0.423742313                          | 152.585281                               |
| 17.98673627                                 | 0.863543603                  | 0.18260506                   | 0.370998769                          | 337.3126248                              |
| 7.52258462                                  | 0.86023114                   | 0.266056253                  | 0.29368982                           | 132.5052761                              |
| 17.43015951                                 | 0.824881516                  | 0.188406631                  | 0.242879617                          | 220.7986075                              |
| 16.22009501                                 | 0.912429079                  | 0.289967114                  | 0.375413581                          | 495.1484199                              |
| 22.79830303                                 | 0.877746364                  | 0.185583597                  | 0.261045089                          | 236.6840949                              |
| 14.74256375                                 | 0.893309678                  | 0.292763555                  | 0.281892688                          | 290.2268753                              |
| 11.34589635                                 | 0.900463302                  | 0.299604311                  | 0.359328425                          | 147.73079                                |
| 9.116578899                                 | 0.904673253                  | 0.30961591                   | 0.393128877                          | 151.6167891                              |
| 32.11771116                                 | 0.848701946                  | 0.148815085                  | 0.343038602                          | 325.2216138                              |
| 12.56622607                                 | 0.88905442                   | 0.22750524                   | 0.340420952                          | 338.8416078                              |
| 18.57613051                                 | 0.840351564                  | 0.161359596                  | 0.341388673                          | 252.9295762                              |
| 7.640643737                                 | 0.876099109                  | 0.251580594                  | 0.482863342                          | 124.7003311                              |
| 22.6114919                                  | 0.893163687                  | 0.24598646                   | 0.265423782                          | 207.5369513                              |

| log.sigma.2.5.mm.3D_glcM_SumEntropy | log.sigma.2.5.mm.3D_glcM_AverageIntensity | log.sigma.2.5.mm.3D_glcM_Energy | log.sigma.2.5.mm.3D_glcM_SumSquares | log.sigma.2.5.mm.3D_glcM_ClusterProminence |
|-------------------------------------|-------------------------------------------|---------------------------------|-------------------------------------|--------------------------------------------|
| 5.119658473                         | 13.54501833                               | 0.00429274                      | 30.92006096                         | 19125.70397                                |
| 4.870781571                         | 15.09990757                               | 0.009134621                     | 22.42548707                         | 11027.77283                                |
| 4.922967721                         | 12.28674121                               | 0.005869303                     | 28.40161095                         | 15840.61945                                |
| 5.249011114                         | 18.38115215                               | 0.002914659                     | 34.17406027                         | 22733.73337                                |
| 5.160877816                         | 16.0547769                                | 0.005368134                     | 34.25007195                         | 28572.41665                                |
| 4.784842802                         | 10.58893625                               | 0.00592906                      | 18.75076466                         | 6213.222932                                |
| 4.474500559                         | 13.7485857                                | 0.011047848                     | 13.52316162                         | 4257.681696                                |
| 5.347123629                         | 13.61869107                               | 0.003078058                     | 42.51224604                         | 29439.25116                                |
| 5.293488525                         | 15.6391261                                | 0.002976912                     | 35.59448165                         | 25852.23343                                |
| 4.856519446                         | 14.84403255                               | 0.00623232                      | 20.91404651                         | 9779.946116                                |
| 4.834012517                         | 14.95568008                               | 0.005538191                     | 20.94176413                         | 7312.037601                                |
| 5.018141007                         | 12.90154195                               | 0.004949694                     | 25.74148351                         | 14312.99847                                |
| 4.901687453                         | 11.54884244                               | 0.00529715                      | 20.14428014                         | 10795.54124                                |
| 4.963354322                         | 11.31863227                               | 0.005012917                     | 22.780419                           | 10058.31295                                |
| 4.960933783                         | 13.99656024                               | 0.004597392                     | 23.54705805                         | 10459.54995                                |
| 4.37519072                          | 12.67219475                               | 0.033507814                     | 13.21237882                         | 6840.001414                                |
| 5.093983163                         | 13.08869911                               | 0.00434185                      | 30.13879159                         | 15557.87653                                |
| 5.036882856                         | 10.92178253                               | 0.005022667                     | 25.43234856                         | 16095.76041                                |
| 5.276408266                         | 13.36963074                               | 0.003889042                     | 39.54039198                         | 27105.97095                                |
| 4.630482692                         | 9.99865785                                | 0.009935062                     | 13.86059                            | 4840.367701                                |
| 4.623319313                         | 13.48176666                               | 0.009907295                     | 14.97455229                         | 5475.649397                                |
| 5.080105869                         | 13.58735444                               | 0.004095999                     | 27.41610007                         | 17311.9141                                 |
| 4.875959413                         | 11.58034969                               | 0.006111381                     | 20.08027002                         | 10140.59913                                |
| 5.067144448                         | 17.91243967                               | 0.00493928                      | 31.71104819                         | 22432.63653                                |
| 4.65734993                          | 11.96821453                               | 0.008065484                     | 17.83265762                         | 6629.363798                                |
| 5.072287845                         | 14.034142                                 | 0.004900156                     | 31.84659228                         | 18807.20302                                |
| 4.528308907                         | 17.43564775                               | 0.013463707                     | 14.07819516                         | 6340.009618                                |
| 4.847903807                         | 11.94176703                               | 0.006885949                     | 22.45507419                         | 11598.10416                                |
| 5.201621205                         | 14.93123996                               | 0.003910884                     | 36.29005734                         | 19735.02222                                |
| 4.804812116                         | 14.29755002                               | 0.01006188                      | 20.17840081                         | 10450.90185                                |
| 4.732287481                         | 13.19397823                               | 0.007311759                     | 18.12281179                         | 7831.259143                                |
| 4.852486103                         | 11.61353338                               | 0.007352518                     | 18.30224569                         | 9181.190747                                |
| 5.16590494                          | 14.83108854                               | 0.003514372                     | 31.92954624                         | 17449.63029                                |
| 4.782127864                         | 18.65647912                               | 0.011273092                     | 43.45070406                         | 37695.99039                                |
| 5.197996497                         | 14.64066418                               | 0.004587789                     | 40.78237612                         | 26487.06655                                |
| 5.0358602                           | 16.19121688                               | 0.004189212                     | 25.64728941                         | 11192.83983                                |
| 5.072135819                         | 14.08608076                               | 0.004653195                     | 29.74951346                         | 17217.24687                                |
| 4.864847283                         | 13.46669608                               | 0.005231141                     | 19.09554948                         | 7457.983681                                |
| 4.988852123                         | 15.78722825                               | 0.005116589                     | 25.56296866                         | 13770.02512                                |
| 5.071150311                         | 13.49844403                               | 0.004183925                     | 27.49178907                         | 13512.35267                                |
| 4.8669892                           | 11.89072678                               | 0.006398064                     | 19.71340479                         | 8950.020919                                |
| 5.186389263                         | 13.31126652                               | 0.004019385                     | 31.20530696                         | 20076.13858                                |
| 5.089555699                         | 15.64957586                               | 0.004141624                     | 29.98610808                         | 13994.84672                                |
| 5.245160824                         | 15.91156797                               | 0.003513726                     | 35.8072079                          | 24163.64684                                |
| 5.0303399                           | 15.00846972                               | 0.003796689                     | 25.57602529                         | 11519.21241                                |
| 4.480199514                         | 8.513925594                               | 0.009787545                     | 12.7585955                          | 3591.113534                                |
| 5.086631364                         | 16.9870589                                | 0.003526553                     | 27.63453957                         | 14465.30102                                |
| 4.965847748                         | 10.73076779                               | 0.004722706                     | 25.72901734                         | 11453.53599                                |
| 4.793511423                         | 20.36501172                               | 0.01278399                      | 39.85596914                         | 38417.35018                                |
| 5.19845288                          | 14.27873752                               | 0.005390233                     | 37.64090772                         | 32334.9551                                 |
| 4.906395838                         | 14.15978804                               | 0.005762933                     | 21.14478077                         | 9924.17269                                 |
| 4.968164935                         | 11.31311339                               | 0.005795334                     | 28.61356642                         | 11373.37381                                |
| 5.012212873                         | 18.13548752                               | 0.004806818                     | 24.84152535                         | 14633.93818                                |
| 4.803385445                         | 11.10169913                               | 0.00604402                      | 18.55025161                         | 7129.67796                                 |
| 4.755084019                         | 11.2997206                                | 0.014251276                     | 18.33260168                         | 8886.22503                                 |
| 5.326545791                         | 15.77472884                               | 0.002997941                     | 42.49554541                         | 27875.31631                                |
| 5.381433829                         | 17.57570954                               | 0.002480659                     | 43.47439067                         | 33396.11457                                |
| 5.17798157                          | 18.27680148                               | 0.003932218                     | 34.14200588                         | 25546.00432                                |
| 4.965333085                         | 13.14068251                               | 0.005883866                     | 23.56638922                         | 11687.58976                                |
| 4.641608575                         | 17.76568731                               | 0.00741254                      | 14.8192665                          | 4241.239541                                |
| 5.090588911                         | 13.42212076                               | 0.004305207                     | 29.58303321                         | 17066.02935                                |
| 5.173278996                         | 14.99816528                               | 0.003856543                     | 31.11682345                         | 26304.69213                                |
| 4.602019301                         | 12.73927891                               | 0.010446493                     | 13.97927398                         | 5324.355831                                |
| 4.505751293                         | 21.94142377                               | 0.015727065                     | 13.55198138                         | 5283.698591                                |
| 4.895646568                         | 11.52134186                               | 0.007324905                     | 25.13572238                         | 11743.70952                                |
| 5.126984538                         | 15.80896735                               | 0.004506488                     | 32.00907048                         | 25509.74654                                |
| 5.057108789                         | 14.76846669                               | 0.004894023                     | 33.58933369                         | 18144.63551                                |
| 5.170078646                         | 17.31357153                               | 0.003610012                     | 30.47751543                         | 18890.75696                                |
| 4.931157765                         | 13.00258265                               | 0.005764192                     | 25.44433791                         | 10287.02333                                |
| 5.148887937                         | 14.47342779                               | 0.003799671                     | 31.87708363                         | 17625.30691                                |
| 5.093402932                         | 14.00773203                               | 0.00433948                      | 29.07412009                         | 15449.37782                                |
| 5.08795971                          | 11.93589137                               | 0.004406013                     | 28.13562623                         | 15464.26274                                |
| 4.836807374                         | 14.05733685                               | 0.007312029                     | 20.22478168                         | 9326.072527                                |
| 4.716000776                         | 13.63903068                               | 0.00883707                      | 16.36423582                         | 6486.929881                                |
| 4.769129428                         | 20.18721848                               | 0.009315237                     | 18.55653887                         | 11743.83722                                |
| 5.274170154                         | 16.53532159                               | 0.003138533                     | 39.94947903                         | 25002.96343                                |
| 5.055673551                         | 13.9746667                                | 0.004090332                     | 27.72660377                         | 13326.61471                                |
| 4.978500162                         | 11.31544175                               | 0.005357358                     | 29.15652149                         | 16776.31605                                |
| 5.140107614                         | 15.81728763                               | 0.003722728                     | 31.45766187                         | 16366.53183                                |
| 5.032854462                         | 13.85758499                               | 0.004394944                     | 27.15585362                         | 12060.2853                                 |
| 5.255849218                         | 14.4883966                                | 0.003812797                     | 43.11425127                         | 27044.20514                                |
| 5.422611569                         | 18.16897646                               | 0.002499498                     | 45.7066009                          | 35500.37218                                |
| 5.243919908                         | 21.41404923                               | 0.003425241                     | 33.5697865                          | 21910.84897                                |
| 4.840376366                         | 18.22791932                               | 0.009766443                     | 36.68307543                         | 30178.96917                                |
| 4.885611599                         | 12.33735282                               | 0.005248468                     | 20.09341556                         | 8391.645016                                |
| 4.65725099                          | 17.62089991                               | 0.009214329                     | 15.92738715                         | 8464.626035                                |
| 5.041079572                         | 11.88062526                               | 0.005095396                     | 28.52425666                         | 16189.8013                                 |
| 5.313034892                         | 18.30269996                               | 0.003185555                     | 39.55488146                         | 26078.2373                                 |
| 4.465280132                         | 11.30138454                               | 0.011114682                     | 15.83065475                         | 4366.867125                                |
| 4.619319293                         | 14.59808511                               | 0.013685266                     | 32.32401806                         | 16056.24415                                |
| 5.070744202                         | 22.19393227                               | 0.006283393                     | 26.39534697                         | 18427.24543                                |
| 5.154064357                         | 15.4272025                                | 0.004060067                     | 39.33974429                         | 27812.03853                                |
| 4.840012728                         | 17.02805071                               | 0.009854912                     | 22.08494573                         | 9272.422438                                |
| 4.837985233                         | 11.89625365                               | 0.006552423                     | 19.2506192                          | 8958.227114                                |
| 4.757277865                         | 12.05884659                               | 0.00669757                      | 16.39131065                         | 6158.690102                                |
| 5.44527611                          | 17.93364124                               | 0.004687883                     | 68.09318745                         | 74964.10122                                |
| 4.952638106                         | 18.41410508                               | 0.005045321                     | 23.32809537                         | 11946.12119                                |
| 4.917483029                         | 15.55528757                               | 0.008902952                     | 41.69835999                         | 30999.59609                                |
| 4.845250908                         | 10.7297462                                | 0.007513809                     | 19.75354922                         | 9142.559023                                |
| 5.052763093                         | 14.45397232                               | 0.00569345                      | 33.53046412                         | 25276.60761                                |

| log.sigma.2.5.mm.3D_glc_m_SumAverage | log.sigma.2.5.mm.3D_glc_m_Irc2 | log.sigma.2.5.mm.3D_glc_m_Irc1 | log.sigma.2.5.mm.3D_glc_m_DifferenceAverage | log.sigma.2.5.mm.3D_glc_m_Id |
|--------------------------------------|--------------------------------|--------------------------------|---------------------------------------------|------------------------------|
| 26.92220694                          | 0.846601084                    | -0.144181851                   | 4.618904877                                 | 0.306946056                  |
| 29.80158765                          | 0.792943316                    | -0.122767884                   | 3.663989053                                 | 0.394977237                  |
| 24.33754057                          | 0.891844485                    | -0.18593825                    | 4.647755703                                 | 0.302973205                  |
| 36.07610644                          | 0.685358355                    | -0.072361227                   | 5.324600997                                 | 0.286515866                  |
| 31.86205715                          | 0.950310297                    | -0.259500786                   | 4.631854537                                 | 0.295590015                  |
| 21.17787251                          | 0.759996415                    | -0.107911487                   | 3.840774152                                 | 0.329169741                  |
| 27.4971714                           | 0.853839306                    | -0.174376865                   | 3.288683724                                 | 0.363035545                  |
| 26.95325811                          | 0.812513345                    | -0.118497314                   | 5.564648661                                 | 0.273390882                  |
| 30.83998643                          | 0.727076136                    | -0.085824685                   | 4.98789845                                  | 0.294321498                  |
| 29.30153525                          | 0.646572857                    | -0.069303665                   | 3.767021912                                 | 0.354677317                  |
| 29.91136015                          | 0.734930099                    | -0.098398718                   | 4.119490525                                 | 0.322000788                  |
| 25.69680327                          | 0.749353289                    | -0.101422159                   | 4.065229304                                 | 0.336011204                  |
| 23.08103276                          | 0.701268254                    | -0.089271802                   | 3.598628754                                 | 0.344041863                  |
| 22.63486194                          | 0.741231611                    | -0.102092932                   | 3.899884021                                 | 0.327740796                  |
| 27.92023934                          | 0.763560289                    | -0.104191502                   | 4.285959859                                 | 0.307056025                  |
| 25.23138404                          | 0.788972428                    | -0.139293822                   | 2.396551197                                 | 0.509503985                  |
| 26.11693383                          | 0.833042662                    | -0.13981569                    | 4.631091407                                 | 0.298196887                  |
| 21.79577998                          | 0.720106473                    | -0.093929965                   | 3.810207274                                 | 0.355151779                  |
| 26.5526853                           | 0.89559332                     | -0.180922783                   | 5.04593648                                  | 0.290979661                  |
| 19.99973157                          | 0.725856049                    | -0.104369989                   | 2.811265124                                 | 0.433101265                  |
| 26.89268203                          | 0.612825322                    | -0.065130126                   | 3.158074072                                 | 0.402625005                  |
| 26.98352109                          | 0.728101306                    | -0.090946189                   | 4.352044144                                 | 0.306858923                  |
| 23.14140341                          | 0.659855214                    | -0.076771859                   | 3.611193799                                 | 0.356175845                  |
| 35.43436262                          | 0.892866077                    | -0.181860043                   | 4.886600825                                 | 0.291060578                  |
| 23.80685965                          | 0.716588438                    | -0.093544624                   | 3.620244964                                 | 0.363041873                  |
| 27.65727829                          | 0.869684345                    | -0.160998364                   | 4.742233046                                 | 0.32040236                   |
| 34.52285401                          | 0.686005858                    | -0.086747656                   | 2.971016314                                 | 0.42661783                   |
| 23.78807515                          | 0.73072807                     | -0.096023392                   | 3.903355049                                 | 0.347493726                  |
| 29.55072118                          | 0.722388706                    | -0.092817635                   | 4.910318402                                 | 0.305143054                  |
| 28.21802851                          | 0.78233502                     | -0.117790731                   | 3.467605745                                 | 0.405039894                  |
| 26.30458424                          | 0.628418793                    | -0.067012379                   | 3.553082941                                 | 0.36473745                   |
| 23.20891479                          | 0.67697717                     | -0.085123659                   | 3.201357855                                 | 0.393881599                  |
| 29.12757383                          | 0.708536049                    | -0.081930864                   | 4.781559915                                 | 0.307426892                  |
| 36.84207807                          | 0.994106808                    | -0.504638938                   | 6.210641933                                 | 0.253244945                  |
| 29.05264086                          | 0.945543743                    | -0.246357149                   | 5.641744553                                 | 0.265063891                  |
| 32.01315331                          | 0.679951844                    | -0.078094976                   | 4.11119669                                  | 0.323976129                  |
| 27.59552635                          | 0.694356563                    | -0.08083003                    | 4.535780458                                 | 0.333357527                  |
| 26.91250112                          | 0.623374636                    | -0.064143081                   | 3.657949727                                 | 0.352175304                  |
| 31.38173999                          | 0.808846385                    | -0.138402373                   | 4.434611759                                 | 0.309892355                  |
| 26.89069898                          | 0.765481467                    | -0.103874705                   | 4.409687914                                 | 0.318156843                  |
| 23.76638835                          | 0.748759084                    | -0.10331789                    | 3.55496616                                  | 0.370313364                  |
| 26.56036258                          | 0.810811046                    | -0.123830708                   | 4.546038115                                 | 0.302961476                  |
| 30.9898983                           | 0.725820009                    | -0.090536364                   | 4.675073795                                 | 0.30415633                   |
| 31.45468694                          | 0.821223632                    | -0.126690328                   | 5.021317031                                 | 0.296471152                  |
| 29.86459047                          | 0.66680043                     | -0.071495799                   | 4.498933527                                 | 0.298587097                  |
| 17.02785119                          | 0.629019799                    | -0.072256456                   | 3.00581127                                  | 0.400157429                  |
| 33.41354967                          | 0.592411506                    | -0.052854669                   | 4.704386728                                 | 0.30213926                   |
| 21.4521406                           | 0.815505413                    | -0.130641297                   | 4.466598226                                 | 0.304203088                  |
| 40.00961641                          | 0.97886525                     | -0.382943417                   | 5.454368486                                 | 0.285205813                  |
| 28.34277611                          | 0.908085471                    | -0.196181805                   | 5.005718763                                 | 0.299862633                  |
| 28.14107886                          | 0.666338405                    | -0.075967189                   | 3.706647337                                 | 0.35945848                   |
| 22.62622679                          | 0.749169999                    | -0.105736031                   | 4.484257193                                 | 0.324332208                  |
| 35.73251902                          | 0.686860721                    | -0.080662259                   | 4.187905551                                 | 0.347585606                  |
| 22.20339826                          | 0.796012492                    | -0.124694008                   | 3.626982694                                 | 0.341026556                  |
| 22.56622323                          | 0.801415686                    | -0.13531402                    | 2.9964958                                   | 0.4525934                    |
| 30.91125882                          | 0.83652658                     | -0.130130555                   | 5.898029118                                 | 0.260967284                  |
| 34.3069245                           | 0.739550265                    | -0.09067882                    | 6.087101275                                 | 0.259081245                  |
| 35.92999182                          | 0.774484035                    | -0.105559997                   | 5.276430022                                 | 0.284318539                  |
| 26.24231824                          | 0.819797798                    | -0.133031745                   | 3.933726058                                 | 0.348841912                  |
| 35.40178419                          | 0.73595524                     | -0.105596086                   | 3.125852534                                 | 0.368074471                  |
| 26.62286149                          | 0.702495612                    | -0.082037243                   | 4.456759677                                 | 0.314664569                  |
| 29.44262171                          | 0.685603028                    | -0.077296944                   | 4.489464013                                 | 0.332800273                  |
| 25.45236109                          | 0.701542874                    | -0.094916204                   | 2.934596515                                 | 0.420131773                  |
| 43.57901812                          | 0.784685444                    | -0.129056339                   | 2.915577473                                 | 0.449726219                  |
| 23.04268372                          | 0.945226773                    | -0.265194848                   | 4.285610887                                 | 0.310786764                  |
| 30.8884588                           | 0.795773963                    | -0.114243877                   | 4.901217822                                 | 0.305064038                  |
| 29.34786201                          | 0.914932393                    | -0.20443689                    | 5.24710039                                  | 0.278841956                  |
| 33.99207443                          | 0.68041307                     | -0.075515351                   | 4.638035812                                 | 0.317540525                  |
| 26.00516531                          | 0.843037195                    | -0.150316454                   | 4.32822924                                  | 0.311835284                  |
| 28.46387267                          | 0.718032368                    | -0.084869105                   | 4.793968295                                 | 0.311335155                  |
| 27.81509119                          | 0.691924904                    | -0.082310047                   | 4.315288091                                 | 0.33089207                   |
| 23.82533383                          | 0.765666397                    | -0.10572966                    | 4.314495575                                 | 0.320367886                  |
| 27.92525473                          | 0.685300927                    | -0.084975522                   | 3.458856605                                 | 0.396763716                  |
| 27.22519367                          | 0.674048733                    | -0.082243049                   | 3.103403724                                 | 0.410077216                  |
| 39.93811974                          | 0.650636181                    | -0.072101145                   | 3.481014461                                 | 0.392720567                  |
| 32.37832159                          | 0.800348263                    | -0.114115526                   | 5.705080126                                 | 0.264832426                  |
| 27.79951255                          | 0.763393852                    | -0.103485221                   | 4.566746251                                 | 0.310294061                  |
| 22.58258307                          | 0.825282064                    | -0.136401206                   | 4.598488031                                 | 0.305231319                  |
| 31.15279305                          | 0.706871797                    | -0.087518022                   | 4.840110529                                 | 0.297166971                  |
| 27.35308895                          | 0.64978221                     | -0.068397709                   | 4.38505932                                  | 0.325716491                  |
| 28.45863302                          | 0.909349883                    | -0.192256447                   | 5.903428756                                 | 0.256244069                  |
| 35.5494366                           | 0.7891766                      | -0.104913174                   | 6.338564249                                 | 0.245731055                  |
| 42.19051784                          | 0.723466037                    | -0.086033474                   | 5.110373192                                 | 0.303250752                  |
| 36.10595634                          | 0.985209818                    | -0.407589285                   | 5.304143025                                 | 0.285702586                  |
| 24.66179343                          | 0.634877463                    | -0.070949623                   | 3.670024756                                 | 0.353308465                  |
| 34.88580013                          | 0.632009642                    | -0.070030768                   | 3.244351544                                 | 0.397069539                  |
| 23.71713439                          | 0.806903134                    | -0.125118189                   | 4.381780824                                 | 0.311734253                  |
| 35.94608674                          | 0.742029566                    | -0.091637113                   | 5.530844796                                 | 0.271014556                  |
| 22.60276908                          | 0.932113487                    | -0.264940821                   | 3.605609787                                 | 0.351800957                  |
| 29.19617022                          | 0.981432161                    | -0.418692855                   | 5.501425012                                 | 0.275493251                  |
| 44.04922919                          | 0.763334202                    | -0.105098831                   | 4.093656293                                 | 0.366247249                  |
| 30.13852124                          | 0.866177914                    | -0.15424068                    | 5.649511993                                 | 0.274148119                  |
| 33.72006035                          | 0.809194841                    | -0.130288133                   | 3.978466825                                 | 0.37102402                   |
| 23.74084436                          | 0.667900122                    | -0.077984112                   | 3.524886883                                 | 0.378430873                  |
| 24.10001485                          | 0.634235156                    | -0.069853964                   | 3.217998708                                 | 0.388678507                  |
| 34.76933712                          | 0.985229681                    | -0.365722097                   | 7.333716583                                 | 0.233547025                  |
| 36.39460593                          | 0.749143638                    | -0.098749437                   | 4.199801668                                 | 0.317351458                  |
| 30.94441675                          | 0.991228146                    | -0.452910169                   | 5.871111796                                 | 0.251818341                  |
| 21.4594924                           | 0.883671188                    | -0.187680161                   | 3.528279566                                 | 0.343111046                  |
| 28.25100204                          | 0.865838114                    | -0.159052011                   | 4.800884124                                 | 0.327524612                  |

| log.sigma.2.5.mm.3D_glcm_ClusterTendency | log.sigma.2.5.mm.3D_firstorder_InterquartileRange | log.sigma.2.5.mm.3D_firstorder_Skewness | log.sigma.2.5.mm.3D_firstorder_Uniformity |
|------------------------------------------|---------------------------------------------------|-----------------------------------------|-------------------------------------------|
| 82.91404847                              | 198.5801525                                       | 0.338366828                             | 0.052708873                               |
| 57.73568638                              | 131.3191996                                       | 0.410453552                             | 0.070909605                               |
| 71.45604995                              | 192.0229244                                       | 0.611653487                             | 0.059153943                               |
| 89.18423929                              | 215.6613235                                       | -0.01805539                             | 0.047041108                               |
| 98.91427164                              | 175.7034569                                       | -0.042055519                            | 0.053374819                               |
| 50.70865769                              | 171.8659                                          | 0.103465082                             | 0.065021321                               |
| 35.17486978                              | 95.34950638                                       | -0.539102226                            | 0.095422166                               |
| 113.5521635                              | 260.5724754                                       | 0.020588839                             | 0.046575512                               |
| 96.58753944                              | 220.7206573                                       | 0.135153484                             | 0.046482137                               |
| 53.12556224                              | 137.0725613                                       | 0.609331572                             | 0.06925666                                |
| 55.60146917                              | 189.1699905                                       | -0.407939827                            | 0.066944083                               |
| 69.93562992                              | 172.3507195                                       | 0.477257096                             | 0.057834819                               |
| 57.83495855                              | 160.1186981                                       | 0.318221131                             | 0.063782292                               |
| 65.62575396                              | 200.6708832                                       | 0.089056168                             | 0.060584484                               |
| 61.88737719                              | 163.8919907                                       | -0.024290271                            | 0.059737011                               |
| 35.4869914                               | 59.09825993                                       | 0.760461525                             | 0.137881464                               |
| 83.50198832                              | 218.6703987                                       | -0.106623938                            | 0.053776242                               |
| 73.19837292                              | 188.5605793                                       | 0.522582052                             | 0.057883235                               |
| 110.6328435                              | 240.238409                                        | -0.065053648                            | 0.046692883                               |
| 39.25871897                              | 126.5623322                                       | 0.387766612                             | 0.07815985                                |
| 38.78442932                              | 113.6478953                                       | 0.558413029                             | 0.082462055                               |
| 74.23876898                              | 177.9913654                                       | 0.386358591                             | 0.056047188                               |
| 56.25572004                              | 149.3898602                                       | 0.529500603                             | 0.067379817                               |
| 82.96806241                              | 181.8370132                                       | -0.48570844                             | 0.057282775                               |
| 43.42748518                              | 133.9128523                                       | 0.728833944                             | 0.075335813                               |
| 78.86962618                              | 192.3992729                                       | 0.465091857                             | 0.053326579                               |
| 36.47538132                              | 92.59931898                                       | 0.686164082                             | 0.093817811                               |
| 58.69530229                              | 147.4731941                                       | 0.658629141                             | 0.067507058                               |
| 98.96739512                              | 262.3833847                                       | -0.196882027                            | 0.052414513                               |
| 51.7408034                               | 124.1992803                                       | 0.530037914                             | 0.073296084                               |
| 47.18326724                              | 137.7247887                                       | 0.595821971                             | 0.074259248                               |
| 53.30528895                              | 144.1253433                                       | 0.52331403                              | 0.071766392                               |
| 83.01898252                              | 220.834198                                        | 0.122223947                             | 0.050894863                               |
| 110.262621                               | 152.993001                                        | -0.488762841                            | 0.057507396                               |
| 106.0609752                              | 234.527174                                        | -0.28496201                             | 0.047212948                               |
| 69.82000401                              | 204.2669659                                       | -0.044245743                            | 0.055607784                               |
| 75.42376267                              | 197.4964581                                       | 0.61540743                              | 0.057070795                               |
| 52.05190962                              | 157.8757477                                       | 0.111615112                             | 0.063470881                               |
| 67.00605264                              | 156.9489861                                       | -0.317760935                            | 0.062431783                               |
| 73.66270791                              | 196.9397888                                       | 0.080968734                             | 0.054195698                               |
| 53.87468055                              | 146.4267607                                       | 0.256989559                             | 0.064314237                               |
| 88.07024144                              | 213.5682297                                       | 0.052187945                             | 0.053475577                               |
| 79.46311013                              | 228.4642315                                       | -0.168730431                            | 0.056282926                               |
| 95.7467777                               | 223.315033                                        | 0.086988576                             | 0.048324569                               |
| 66.50810565                              | 192.4326305                                       | -0.117846091                            | 0.056029628                               |
| 34.06385423                              | 135.5668221                                       | 0.548968903                             | 0.08049623                                |
| 69.95966444                              | 185.6546383                                       | 0.150805892                             | 0.053160447                               |
| 69.61072844                              | 208.8730392                                       | 0.035597903                             | 0.054944408                               |
| 101.6870402                              | 92.07659912                                       | -1.068904073                            | 0.091779906                               |
| 103.6519955                              | 162.1770935                                       | -0.291599425                            | 0.062503795                               |
| 56.30627418                              | 154.3738823                                       | 0.403672851                             | 0.064758999                               |
| 78.75971174                              | 256.4778214                                       | -0.175887788                            | 0.064590038                               |
| 65.9409655                               | 185.0040207                                       | 0.341058156                             | 0.056626485                               |
| 51.96017495                              | 155.4194603                                       | -0.025848639                            | 0.065629107                               |
| 51.22215267                              | 104.9167919                                       | 0.468270886                             | 0.088696234                               |
| 106.5455331                              | 240.9450684                                       | 0.050042207                             | 0.044658515                               |
| 112.8694788                              | 264.4224548                                       | -0.078803202                            | 0.042453406                               |
| 89.63679094                              | 176.1536026                                       | -0.658241438                            | 0.056328652                               |
| 64.8709926                               | 169.2465868                                       | 0.086864017                             | 0.058901653                               |
| 41.0242534                               | 148.8503952                                       | -0.144511174                            | 0.073282476                               |
| 79.38805303                              | 212.6459541                                       | 0.400801376                             | 0.055051255                               |
| 82.49389465                              | 190.4817638                                       | 0.51851843                              | 0.053320854                               |
| 38.06394414                              | 108.8330755                                       | 0.329210555                             | 0.085818121                               |
| 36.95149262                              | 102.1994762                                       | 0.123503718                             | 0.092164351                               |
| 69.6745256                               | 178.8028793                                       | -0.223710113                            | 0.059610525                               |
| 81.73990575                              | 159.4961472                                       | 0.428251925                             | 0.057944472                               |
| 85.22092799                              | 203.2982445                                       | -0.351428686                            | 0.056713649                               |
| 82.90195708                              | 226.712822                                        | 0.257579438                             | 0.050282419                               |
| 70.44888326                              | 222.3421103                                       | -0.141854363                            | 0.0601661                                 |
| 81.19258999                              | 199.657814                                        | 0.364532638                             | 0.052943272                               |
| 78.21333015                              | 202.2424641                                       | 0.41716647                              | 0.055796399                               |
| 78.67983302                              | 214.5658722                                       | 0.156484226                             | 0.055316752                               |
| 53.05983834                              | 139.1230602                                       | 0.611707266                             | 0.069740541                               |
| 44.61616848                              | 122.2970915                                       | 0.495157393                             | 0.076853175                               |
| 50.41902109                              | 105.499403                                        | 0.495447182                             | 0.080657534                               |
| 102.1470075                              | 256.3633633                                       | -0.128506973                            | 0.046468121                               |
| 72.24112422                              | 202.6510925                                       | -0.003160904                            | 0.055298235                               |
| 78.72973434                              | 223.8133202                                       | 0.44291763                              | 0.056237571                               |
| 80.61502102                              | 216.8158569                                       | 0.104895605                             | 0.052093135                               |
| 69.70383155                              | 196.2854977                                       | 0.336094236                             | 0.058155125                               |
| 107.9779733                              | 283.3621197                                       | 0.09033053                              | 0.044028723                               |
| 118.2471909                              | 267.8412857                                       | -0.104906159                            | 0.041762661                               |
| 90.07251726                              | 196.1460781                                       | 0.037318817                             | 0.052108819                               |
| 96.50375172                              | 154.8357353                                       | -0.842574044                            | 0.065969084                               |
| 55.85968222                              | 173.4365387                                       | 0.332674763                             | 0.062574697                               |
| 42.39823631                              | 114.2628136                                       | 0.724045979                             | 0.082741291                               |
| 80.19036567                              | 224.7263851                                       | 0.333322879                             | 0.055339312                               |
| 106.749988                               | 260.2001438                                       | -0.400202297                            | 0.050403869                               |
| 41.06833414                              | 146.5712051                                       | -0.259106039                            | 0.073546538                               |
| 79.68865931                              | 180.2725716                                       | -0.866157014                            | 0.083718821                               |
| 73.87545122                              | 167.2649002                                       | 0.077523498                             | 0.060704751                               |
| 93.85576154                              | 236.0814705                                       | 0.554696797                             | 0.047877762                               |
| 54.83509874                              | 156.0353632                                       | -0.018852511                            | 0.070628176                               |
| 51.4846998                               | 146.4063911                                       | 0.339417716                             | 0.066809261                               |
| 45.34810408                              | 144.822711                                        | 0.374793123                             | 0.069007687                               |
| 181.1856471                              | 357.6787262                                       | -0.024207753                            | 0.038041525                               |
| 61.36275819                              | 156.6125822                                       | -0.340825512                            | 0.060241192                               |
| 108.476435                               | 178.0675201                                       | -0.560527804                            | 0.05651398                                |
| 58.59401158                              | 138.0979919                                       | -0.122889921                            | 0.071254029                               |
| 78.35894199                              | 164.8285542                                       | 0.847637441                             | 0.058476865                               |



| log.sigma.2.5.mm.3D_firstorder_MeanAbsoluteDeviation | log.sigma.2.5.mm.3D_firstorder_Energy | log.sigma.2.5.mm.3D_firstorder_RobustMeanAbsoluteDeviation | log.sigma.2.5.mm.3D_firstorder_Median |
|------------------------------------------------------|---------------------------------------|------------------------------------------------------------|---------------------------------------|
| 111.5064761                                          | 13104426.05                           | 81.44381115                                                | -13.8582387                           |
| 86.43106039                                          | 26820731.91                           | 57.27171711                                                | -14.90921879                          |
| 104.4986626                                          | 7434712.9                             | 75.18845062                                                | -44.71576309                          |
| 120.0543389                                          | 57275360.44                           | 87.82839508                                                | 22.61924744                           |
| 112.5175487                                          | 7412855.022                           | 75.92800714                                                | 10.9218235                            |
| 91.59324193                                          | 8282020.698                           | 70.05281821                                                | -28.85847282                          |
| 66.63551804                                          | 2665148.17                            | 41.72372762                                                | 6.827986717                           |
| 135.1445633                                          | 25061760.41                           | 104.6906614                                                | 4.9419384                             |
| 122.7963668                                          | 46908522.45                           | 90.54720666                                                | -21.38686752                          |
| 87.50119367                                          | 39978254.08                           | 59.11721063                                                | -35.50225258                          |
| 96.15572341                                          | 11025649.49                           | 74.21064852                                                | -1.716737151                          |
| 102.3653961                                          | 23910709.36                           | 72.7747046                                                 | -31.12221527                          |
| 91.05650137                                          | 26027542.06                           | 65.95280971                                                | 6.783992529                           |
| 102.1432613                                          | 15803820.58                           | 80.03656242                                                | 10.35583496                           |
| 94.45150822                                          | 12704172.46                           | 67.25428006                                                | 20.18841362                           |
| 55.59684055                                          | 48665758.13                           | 28.83328058                                                | -2.812831879                          |
| 115.3316667                                          | 12972415.72                           | 89.63151538                                                | 0.004750147                           |
| 103.8526769                                          | 36984866.05                           | 75.96629135                                                | -26.46100712                          |
| 127.4193864                                          | 13598677.53                           | 95.94304688                                                | 23.83413792                           |
| 73.0443534                                           | 24203282.18                           | 50.8432006                                                 | -5.923105717                          |
| 73.78145294                                          | 50917183.68                           | 48.67312016                                                | -33.19821358                          |
| 102.9495837                                          | 27970311.79                           | 73.50805646                                                | 0.298611693                           |
| 88.91036493                                          | 34093438.74                           | 62.27001858                                                | -32.80426407                          |
| 106.9476371                                          | 8609817.987                           | 74.22245911                                                | 24.15733719                           |
| 81.14475895                                          | 14501955.74                           | 54.86357961                                                | -52.64126778                          |
| 110.9174454                                          | 13757685.79                           | 78.74279012                                                | -44.00499916                          |
| 67.39847314                                          | 30151981.25                           | 41.43389301                                                | -10.52275133                          |
| 93.19401822                                          | 21594754.84                           | 63.1232247                                                 | -53.57873917                          |
| 129.7324545                                          | 38406875.94                           | 105.1901617                                                | 31.20385933                           |
| 84.27926164                                          | 33362847.21                           | 55.94196108                                                | -28.76881123                          |
| 82.71658881                                          | 37013415.01                           | 56.85700655                                                | -44.40602493                          |
| 83.98162209                                          | 66437889.36                           | 58.27565831                                                | -8.740665436                          |
| 116.8372257                                          | 39135451.58                           | 89.13275447                                                | 11.43070793                           |
| 116.7913405                                          | 2484701.9                             | 73.29142826                                                | 19.03251457                           |
| 129.1756877                                          | 7893022.587                           | 95.39013384                                                | 17.64030933                           |
| 107.2169199                                          | 31648564.1                            | 83.57075906                                                | -2.474123001                          |
| 109.2792664                                          | 51853135.25                           | 80.12380352                                                | -36.26464462                          |
| 89.3005252                                           | 40136354.43                           | 64.75486104                                                | 0.746542513                           |
| 95.23482956                                          | 12205180.05                           | 65.55518196                                                | 24.16675186                           |
| 107.3963855                                          | 17935572.17                           | 80.04286609                                                | -9.145194054                          |
| 88.72378739                                          | 18453754.54                           | 61.5892202                                                 | -18.51292992                          |
| 116.5145608                                          | 18319329.31                           | 88.69792066                                                | -5.146178246                          |
| 114.9146316                                          | 29398064.69                           | 90.60996067                                                | -0.998590052                          |
| 123.1651328                                          | 22321986.43                           | 92.03600078                                                | 1.110691071                           |
| 103.9287808                                          | 29027678.75                           | 77.99001899                                                | 0.635365665                           |
| 76.26753373                                          | 19464762.53                           | 56.13538428                                                | -33.25906754                          |
| 105.8667704                                          | 73077380.55                           | 75.96977835                                                | 1.91572994                            |
| 107.7681095                                          | 9805112.715                           | 83.11296576                                                | -24.33673859                          |
| 103.5225728                                          | 2923279.405                           | 55.51293413                                                | -21.58437824                          |
| 113.7345076                                          | 10593386.02                           | 75.08067818                                                | 38.49808502                           |
| 88.56035078                                          | 42412442.64                           | 62.38498268                                                | -12.07446766                          |
| 122.0017075                                          | 16135259.81                           | 103.2953804                                                | -9.877625465                          |
| 101.6323228                                          | 60730268.37                           | 73.40865468                                                | -13.22870159                          |
| 86.24779696                                          | 6573014.013                           | 62.87435918                                                | 6.144016266                           |
| 73.98036505                                          | 65748010.79                           | 46.27256741                                                | -4.639205456                          |
| 132.2380997                                          | 21915765.02                           | 99.92047658                                                | -14.16979694                          |
| 139.7537386                                          | 60130233.11                           | 106.8538216                                                | -5.968500137                          |
| 112.8025722                                          | 26572614.8                            | 75.91896806                                                | 28.75768089                           |
| 97.19979304                                          | 12330188.17                           | 68.99792942                                                | -24.62186432                          |
| 80.43189018                                          | 8348995.553                           | 60.63240295                                                | -8.688201904                          |
| 114.4696565                                          | 39073074.09                           | 87.80657126                                                | -41.08408356                          |
| 108.2333346                                          | 100914323.7                           | 76.72361879                                                | -2.189120531                          |
| 68.5919383                                           | 25245396.01                           | 45.38396144                                                | 6.253448486                           |
| 70.03435548                                          | 24465811.19                           | 45.02622625                                                | -8.457544327                          |
| 101.4361445                                          | 3413634.466                           | 74.57415917                                                | -23.41552925                          |
| 103.4593635                                          | 29917973.53                           | 67.96812165                                                | 22.86702347                           |
| 116.0365807                                          | 7980581.111                           | 84.39231294                                                | 4.051864624                           |
| 117.8351187                                          | 62778699.86                           | 89.51660733                                                | -7.984398842                          |
| 109.7743508                                          | 7912698.221                           | 87.32941023                                                | -16.5588522                           |
| 111.8030856                                          | 36868377.7                            | 82.54656595                                                | -17.6635704                           |
| 108.6753088                                          | 52061866.25                           | 80.98182826                                                | -30.84878731                          |
| 113.4381912                                          | 20241009.52                           | 88.63454595                                                | -23.67069054                          |
| 84.53676384                                          | 60238098.65                           | 58.4677362                                                 | -14.73540783                          |
| 77.00209343                                          | 67642203.18                           | 52.37748803                                                | -24.10402584                          |
| 77.1220729                                           | 105635996.1                           | 46.94296129                                                | 9.257752895                           |
| 132.7987698                                          | 27470335.77                           | 102.4889989                                                | -6.285346985                          |
| 108.5511949                                          | 19317830.02                           | 82.32868863                                                | -21.62577248                          |
| 115.3052605                                          | 11977951.91                           | 89.01826373                                                | -62.37801933                          |
| 114.475466                                           | 35372867.5                            | 87.26350717                                                | -57.19018364                          |
| 105.0091051                                          | 45626504.98                           | 79.20079106                                                | -39.88191032                          |
| 141.4100237                                          | 15576495.5                            | 110.2624136                                                | -73.71199036                          |
| 144.3140056                                          | 38780361.49                           | 110.2163414                                                | 13.99094772                           |
| 110.7004789                                          | 55498907.25                           | 77.5623869                                                 | 17.91955376                           |
| 103.0755447                                          | 2846114.694                           | 61.92412261                                                | 34.88682556                           |
| 94.35776516                                          | 43181012.18                           | 70.62710233                                                | -11.08082294                          |
| 73.4282635                                           | 52264832.55                           | 47.53409227                                                | -11.9135251                           |
| 115.9431915                                          | 14648290.99                           | 90.0642803                                                 | -45.24918365                          |
| 133.3218959                                          | 37880342.14                           | 103.9003754                                                | 10.92930222                           |
| 84.02139924                                          | 1837534.674                           | 63.08531752                                                | 18.89027596                           |
| 112.463567                                           | 2090075.182                           | 82.17059173                                                | 10.96888828                           |
| 97.70234475                                          | 63637661.39                           | 66.58442571                                                | -6.117517948                          |
| 131.7677912                                          | 19262051.28                           | 96.83150512                                                | -76.58654022                          |
| 88.37225002                                          | 13411729.54                           | 60.26423809                                                | -12.59772539                          |
| 87.64302619                                          | 48857289.19                           | 62.41950697                                                | -12.3721242                           |
| 82.68006209                                          | 60527167.13                           | 59.35465263                                                | -12.64421988                          |
| 183.1762199                                          | 11291521.26                           | 146.4457788                                                | -6.874035358                          |
| 97.36756109                                          | 18528801.16                           | 67.41852286                                                | 29.86811733                           |
| 118.155044                                           | 2735813.894                           | 77.75716994                                                | 34.72352982                           |
| 85.57743832                                          | 4558822.203                           | 58.77790119                                                | 28.85103035                           |
| 109.2744705                                          | 17226688.99                           | 70.50150462                                                | -51.07072449                          |

| log.sigma.2.5.mm.3D_firstorder_TotalEnergy | log.sigma.2.5.mm.3D_firstorder_Maximum | log.sigma.2.5.mm.3D_firstorder_RootMeanSquared | log.sigma.2.5.mm.3D_firstorder_90Percentile | log.sigma.2.5.mm.3D_firstorder_Minimum |
|--------------------------------------------|----------------------------------------|------------------------------------------------|---------------------------------------------|----------------------------------------|
| 353819503.4                                | 370.342926                             | 136.2406327                                    | 165.8438873                                 | -344.4629211                           |
| 724159761.5                                | 439.4565735                            | 113.6362947                                    | 152.6061646                                 | -350.2727051                           |
| 200737248.3                                | 455.5950623                            | 130.8842041                                    | 158.4013885                                 | -314.1792603                           |
| 1546434732                                 | 490.573822                             | 147.4326276                                    | 201.7903961                                 | -408.5057373                           |
| 200147085.6                                | 377.5541077                            | 143.6962812                                    | 184.4049774                                 | -396.6568909                           |
| 223614558.8                                | 240.9631653                            | 113.4913258                                    | 105.1106735                                 | -278.7085876                           |
| 71959000.6                                 | 227.1971283                            | 88.92947511                                    | 86.70670471                                 | -326.6932678                           |
| 676667531                                  | 402.8895264                            | 158.1509941                                    | 183.1542404                                 | -349.5354919                           |
| 1266530106                                 | 432.6713257                            | 150.209926                                     | 170.8937897                                 | -385.6841431                           |
| 1079412860                                 | 482.4882507                            | 113.598136                                     | 144.084137                                  | -365.8652344                           |
| 297692536.3                                | 205.0581512                            | 115.4647278                                    | 108.3259567                                 | -398.7411194                           |
| 645589152.8                                | 360.7912903                            | 127.0200059                                    | 171.3997498                                 | -322.6229858                           |
| 702743635.6                                | 391.78479                              | 112.0242906                                    | 145.0667191                                 | -260.2476196                           |
| 426703155.6                                | 351.9909668                            | 118.8940561                                    | 153.5624649                                 | -271.5505676                           |
| 343012655.6                                | 321.4362488                            | 118.0902391                                    | 167.2671661                                 | -304.8279724                           |
| 1313975470                                 | 539.3448486                            | 69.6761779                                     | 105.5064285                                 | -295.40271                             |
| 350255224.4                                | 330.6973877                            | 136.3272636                                    | 141.9580139                                 | -341.2585449                           |
| 998591383.4                                | 400.8877563                            | 125.9353786                                    | 166.5513672                                 | -264.6266174                           |
| 367164293.4                                | 390.4538269                            | 152.8575327                                    | 205.2341049                                 | -322.8192749                           |
| 653488618.7                                | 323.6492615                            | 92.9566743                                     | 118.9274673                                 | -249.3747101                           |
| 1374763959                                 | 368.9558716                            | 98.72578665                                    | 116.5544418                                 | -335.988678                            |
| 755198418.2                                | 460.0144653                            | 127.5217988                                    | 173.2218628                                 | -310.43396                             |
| 920522846                                  | 345.6599426                            | 111.7312233                                    | 144.9204712                                 | -281.0852966                           |
| 232465085.6                                | 290.9222412                            | 133.7902447                                    | 165.0116577                                 | -422.0794067                           |
| 391552804.9                                | 457.7076416                            | 109.7488667                                    | 117.6565735                                 | -308.3278503                           |
| 371457516.2                                | 404.4634399                            | 404.7968563                                    | 163.1304688                                 | -362.3818054                           |
| 814103493.7                                | 426.7346802                            | 93.27035891                                    | 116.5851059                                 | -424.335144                            |
| 583058380.7                                | 389.1439514                            | 122.7583504                                    | 151.9979767                                 | -302.2788391                           |
| 1036985650                                 | 379.5055542                            | 147.5136253                                    | 185.5926239                                 | -325.2300415                           |
| 900796874.7                                | 568.4447021                            | 114.5628424                                    | 118.466938                                  | -356.0941162                           |
| 999362205.2                                | 374.8093262                            | 107.9031975                                    | 123.4863251                                 | -347.0235901                           |
| 1793823013                                 | 398.3338318                            | 108.8474907                                    | 155.0557175                                 | -274.2567749                           |
| 1056657193                                 | 511.663269                             | 138.7447266                                    | 176.5778229                                 | -348.8345947                           |
| 67086951.3                                 | 324.4610291                            | 154.5683164                                    | 207.1951035                                 | -471.0613098                           |
| 213111609.8                                | 292.8249207                            | 154.1887299                                    | 185.0135452                                 | -363.0621033                           |
| 854511230.8                                | 351.286377                             | 125.1703079                                    | 150.4609863                                 | -381.8804016                           |
| 1400034652                                 | 582.7625732                            | 134.1810749                                    | 178.5019089                                 | -331.73349                             |
| 1083681570                                 | 332.9886169                            | 109.392471                                     | 150.4018341                                 | -313.6530151                           |
| 329539861.3                                | 352.5349426                            | 120.9007117                                    | 155.9568787                                 | -359.8476257                           |
| 484260448.6                                | 365.8306274                            | 130.7584831                                    | 146.920578                                  | -340.1594238                           |
| 498251372.5                                | 347.8742371                            | 111.8906065                                    | 146.3611801                                 | -295.3947449                           |
| 494621891.3                                | 367.9535522                            | 138.646316                                     | 148.1066345                                 | -331.0906677                           |
| 793747746.8                                | 338.4337158                            | 133.8051392                                    | 138.4246002                                 | -380.9173889                           |
| 602693633.6                                | 386.3051453                            | 147.5721781                                    | 178.0949554                                 | -397.5590515                           |
| 783747326.4                                | 326.5047913                            | 124.3249691                                    | 141.2594315                                 | -370.8552856                           |
| 525548588.4                                | 345.0484619                            | 93.46886341                                    | 123.5335419                                 | -218.5570831                           |
| 1973089275                                 | 458.3229675                            | 130.8823428                                    | 181.2758331                                 | -377.8041992                           |
| 264738313.3                                | 328.4962463                            | 129.6857444                                    | 136.5184937                                 | -281.1339417                           |
| 78928543.94                                | 241.6381226                            | 147.7007717                                    | 183.1412567                                 | -505.9125671                           |
| 286021422.7                                | 467.0424805                            | 145.9954109                                    | 166.5436005                                 | -333.7768555                           |
| 1145135951                                 | 420.5357971                            | 111.2960535                                    | 141.5499649                                 | -330.1949158                           |
| 435652015                                  | 233.1394653                            | 139.6803217                                    | 124.2869659                                 | -312.8016052                           |
| 1639717246                                 | 477.5634155                            | 126.0706759                                    | 160.3841705                                 | -435.1495972                           |
| 177471378.4                                | 270.3852539                            | 105.4601874                                    | 144.243103                                  | -260.4098511                           |
| 1775196291                                 | 418.6398315                            | 100.3962797                                    | 145.6357269                                 | -259.916748                            |
| 591725655.5                                | 382.0305786                            | 157.9006363                                    | 190.1722412                                 | -384.8323059                           |
| 1623516294                                 | 523.5181885                            | 165.5873393                                    | 189.1242645                                 | -445.8825378                           |
| 717460599.7                                | 391.3504639                            | 143.3566632                                    | 158.88974                                   | -446.9373779                           |
| 332915080.6                                | 318.7522278                            | 123.075795                                     | 143.4704391                                 | -349.8394165                           |
| 225422879.9                                | 263.2419434                            | 97.34847682                                    | 112.0743103                                 | -426.9316406                           |
| 1054973000                                 | 420.7926636                            | 135.7917271                                    | 163.5632507                                 | -328.6585083                           |
| 2724686740                                 | 612.7379761                            | 135.7267322                                    | 171.6832993                                 | -325.4385376                           |
| 681625692.2                                | 409.7819824                            | 90.38822419                                    | 128.2299118                                 | -285.190979                            |
| 660576902.3                                | 313.7712097                            | 94.64963856                                    | 130.0241699                                 | -528.9921875                           |
| 92168130.57                                | 229.6944733                            | 125.4234205                                    | 139.756189                                  | -311.5490723                           |
| 807785285.3                                | 612.5117188                            | 138.7970894                                    | 203.7561859                                 | -329.1846313                           |
| 215475690                                  | 348.8269348                            | 142.3210526                                    | 131.182402                                  | -384.1815186                           |
| 1695024896                                 | 433.6109009                            | 140.1311998                                    | 174.8936432                                 | -416.5336304                           |
| 213642852                                  | 234.7645111                            | 133.1971315                                    | 110.3468208                                 | -366.290802                            |
| 995446198                                  | 457.1208801                            | 135.4007216                                    | 187.6361084                                 | -328.7217712                           |
| 1405670389                                 | 364.0983582                            | 130.8648689                                    | 179.4539856                                 | -342.944519                            |
| 546507257.1                                | 350.6598816                            | 133.8964657                                    | 139.971283                                  | -307.5348816                           |
| 1626428663                                 | 383.8860168                            | 107.9628586                                    | 138.8240555                                 | -326.7263489                           |
| 1826339486                                 | 338.7112427                            | 100.3583537                                    | 129.3046875                                 | -328.9534607                           |
| 2852171895                                 | 515.0124512                            | 107.2715671                                    | 145.2381531                                 | -464.6225586                           |
| 741699065.9                                | 380.6167908                            | 156.8916703                                    | 166.3689575                                 | -410.493103                            |
| 521581410.5                                | 345.7218933                            | 131.5081243                                    | 131.7865479                                 | -373.4073792                           |
| 323404701.6                                | 318.7301636                            | 140.1284651                                    | 149.0893707                                 | -302.0865784                           |
| 955067422.5                                | 321.1436157                            | 141.6073655                                    | 154.3463821                                 | -408.4886475                           |
| 1231915635                                 | 462.7808533                            | 126.6167476                                    | 150.7988663                                 | -337.635376                            |
| 420565378.4                                | 367.2106323                            | 175.8002987                                    | 153.5383041                                 | -423.056366                            |
| 1047069760                                 | 449.7953796                            | 170.0558348                                    | 206.3710632                                 | -436.0155029                           |
| 1498470496                                 | 497.7666931                            | 140.9887659                                    | 202.5731354                                 | -493.9676819                           |
| 76845096.75                                | 269.1703187                            | 140.1013105                                    | 183.3816437                                 | -432.4517517                           |
| 1168887329                                 | 357.1982117                            | 112.8450502                                    | 163.562851                                  | -287.3373108                           |
| 1411150479                                 | 593.3013916                            | 97.69516302                                    | 126.0051106                                 | -417.0692444                           |
| 395503856.6                                | 347.5917969                            | 137.2156606                                    | 156.3076996                                 | -313.9093628                           |
| 1022769238                                 | 317.3756104                            | 156.2287968                                    | 153.1955948                                 | -473.1691284                           |
| 49613436.19                                | 213.8949127                            | 100.2056539                                    | 140.067865                                  | -269.0405579                           |
| 56432029.91                                | 137.3712158                            | 141.0867744                                    | 91.35574493                                 | -423.6697998                           |
| 1718216857                                 | 412.3717346                            | 126.5285524                                    | 163.7764648                                 | -527.8508911                           |
| 520075384.5                                | 484.4847717                            | 165.17675                                      | 171.2713165                                 | -403.0429688                           |
| 362116697.6                                | 305.4728699                            | 114.5557639                                    | 138.2005463                                 | -415.7792969                           |
| 1319146808                                 | 408.3638611                            | 109.2956883                                    | 131.3670303                                 | -284.4359741                           |
| 1634233512                                 | 384.3813782                            | 102.1025664                                    | 131.936615                                  | -284.2613831                           |
| 304871074                                  | 443.0446472                            | 211.2593638                                    | 218.1478271                                 | -459.7372437                           |
| 500277631.2                                | 330.5808719                            | 123.4402728                                    | 163.2216415                                 | -423.2108765                           |
| 73866975.15                                | 299.6274719                            | 149.1388259                                    | 171.0830078                                 | -382.1488647                           |
| 123088199.5                                | 300.2646484                            | 109.6747675                                    | 149.710675                                  | -241.6482849                           |
| 465120602.7                                | 507.3866272                            | 146.1046839                                    | 181.9885193                                 | -365.4795837                           |

| log.sigma.2.5.mm.3D_firstorder_Entropy | log.sigma.2.5.mm.3D_firstorder_StandardDeviation | log.sigma.2.5.mm.3D_firstorder_Range | log.sigma.2.5.mm.3D_firstorder_Variance | log.sigma.2.5.mm.3D_firstorder_10Percentile |
|----------------------------------------|--------------------------------------------------|--------------------------------------|-----------------------------------------|---------------------------------------------|
| 4.42774368                             | 135.6486898                                      | 714.8058472                          | 18400.56704                             | -178.8882599                                |
| 4.146196915                            | 113.2507643                                      | 789.7292786                          | 12825.73561                             | -152.7328888                                |
| 4.28304027                             | 129.1488638                                      | 769.7743225                          | 16679.42902                             | -175.9462936                                |
| 4.576281878                            | 146.221479                                       | 899.0795593                          | 21380.72093                             | -179.0520416                                |
| 4.497385856                            | 143.6745134                                      | 774.2109985                          | 20642.36581                             | -201.9255585                                |
| 4.08654866                             | 107.9005508                                      | 519.6717529                          | 11642.52885                             | -170.3844513                                |
| 3.760962116                            | 88.75570192                                      | 553.8903961                          | 7877.574623                             | -132.0176117                                |
| 4.585718592                            | 157.7132099                                      | 752.4250183                          | 24873.45657                             | -225.2041916                                |
| 4.584951563                            | 148.7921132                                      | 818.3554688                          | 22139.09294                             | -219.5265015                                |
| 4.140301166                            | 112.1071882                                      | 848.3534851                          | 12568.02164                             | -142.9099152                                |
| 4.066927435                            | 112.8008504                                      | 603.7992706                          | 12724.03186                             | -188.0197021                                |
| 4.318511819                            | 126.5039531                                      | 683.4142761                          | 16003.25015                             | -164.8442993                                |
| 4.164566492                            | 111.8163521                                      | 652.0324097                          | 12502.89659                             | -134.7317505                                |
| 4.192184478                            | 118.8390675                                      | 623.5415344                          | 14122.72397                             | -151.583342                                 |
| 4.255725123                            | 117.1267158                                      | 626.2642212                          | 13718.66756                             | -139.4406586                                |
| 3.522408761                            | 83.60383742                                      | 834.7475586                          | 6989.601631                             | -93.49076996                                |
| 4.363354821                            | 134.7422597                                      | 671.9559326                          | 18155.47655                             | -208.524324                                 |
| 4.283187496                            | 125.8148746                                      | 665.5143738                          | 15829.38267                             | -155.725975                                 |
| 4.552834775                            | 152.3845347                                      | 713.2731018                          | 23221.04641                             | -201.6037231                                |
| 3.90101525                             | 92.84673581                                      | 575.0239716                          | 8620.516351                             | -121.1547546                                |
| 3.922579                               | 96.20224365                                      | 704.9445496                          | 9254.871683                             | -132.5618561                                |
| 4.351887734                            | 127.2847474                                      | 770.4484253                          | 16201.40691                             | -152.4637482                                |
| 4.130975709                            | 110.9065193                                      | 626.7452393                          | 12300.25602                             | -145.9950867                                |
| 4.354284075                            | 133.3398225                                      | 713.0016479                          | 17779.50828                             | -158.1615601                                |
| 4.003604904                            | 103.9001494                                      | 766.0354919                          | 10795.24104                             | -150.2090347                                |
| 4.434634022                            | 137.8715101                                      | 766.8452454                          | 19008.55331                             | -195.0924957                                |
| 3.830647972                            | 93.12540698                                      | 851.0698242                          | 8672.341426                             | -114.2664604                                |
| 4.174293018                            | 118.6444179                                      | 691.4227905                          | 14076.49789                             | -166.7586029                                |
| 4.397834258                            | 147.1602534                                      | 704.7355957                          | 21656.14017                             | -193.1346863                                |
| 4.113561877                            | 110.5612147                                      | 924.5388184                          | 12223.7822                              | -165.3094421                                |
| 4.033284096                            | 104.6472748                                      | 721.8329163                          | 10951.05213                             | -141.019577                                 |
| 4.062126524                            | 105.5850967                                      | 672.5906067                          | 11148.21264                             | -117.4695908                                |
| 4.443848238                            | 138.7120347                                      | 860.4978638                          | 19241.02858                             | -178.9467773                                |
| 4.380895974                            | 154.3127122                                      | 795.5223389                          | 23812.41316                             | -180.9948227                                |
| 4.542902766                            | 154.0689998                                      | 655.8870239                          | 23737.25669                             | -228.2081085                                |
| 4.277690213                            | 124.8126641                                      | 733.1667786                          | 15578.20113                             | -177.8688782                                |
| 4.347755009                            | 133.5343801                                      | 914.4960632                          | 17831.43066                             | -165.3923889                                |
| 4.1584423                              | 109.3804126                                      | 646.6416321                          | 11964.07466                             | -136.8270676                                |
| 4.256954265                            | 120.3140494                                      | 712.3825684                          | 14475.47049                             | -163.5237274                                |
| 4.357972548                            | 129.7480424                                      | 705.9900513                          | 16834.5545                              | -193.5171631                                |
| 4.175040064                            | 111.4222639                                      | 643.2689819                          | 12414.92089                             | -148.0637527                                |
| 4.415412493                            | 137.6520487                                      | 699.04422                            | 18948.08651                             | -199.0632813                                |
| 4.323449937                            | 132.5961998                                      | 719.3511047                          | 17581.7522                              | -177.7252411                                |
| 4.536352419                            | 147.4545263                                      | 783.8641968                          | 21742.83732                             | -206.3297729                                |
| 4.315492485                            | 123.9009423                                      | 697.3600769                          | 15351.44351                             | -177.5310532                                |
| 3.821811456                            | 92.28754575                                      | 563.605545                           | 8516.991101                             | -123.3960449                                |
| 4.422293251                            | 130.7036151                                      | 836.1271667                          | 17083.43499                             | -160.9984207                                |
| 4.284030397                            | 126.837973                                       | 609.630188                           | 16087.87139                             | -199.6004761                                |
| 3.967604324                            | 147.6983425                                      | 747.5506897                          | 21814.80038                             | -216.9760727                                |
| 4.376076702                            | 145.8135503                                      | 800.8193359                          | 21261.59145                             | -225.2966797                                |
| 4.167078104                            | 111.1436145                                      | 750.7307129                          | 12352.90305                             | -141.1539047                                |
| 4.114162893                            | 134.5287209                                      | 545.9410706                          | 18097.97674                             | -222.1784363                                |
| 4.373846974                            | 125.8617661                                      | 912.7130127                          | 15841.18416                             | -164.0044861                                |
| 4.093616068                            | 105.3824843                                      | 530.795105                           | 11105.468                               | -135.775116                                 |
| 3.920778452                            | 100.3951903                                      | 678.5565796                          | 10079.19424                             | -131.9106354                                |
| 4.625415828                            | 156.7872344                                      | 766.8628845                          | 24582.23686                             | -231.1468689                                |
| 4.704403842                            | 164.8857654                                      | 969.4007263                          | 27187.31564                             | -237.9984924                                |
| 4.444955491                            | 143.3524196                                      | 838.2878418                          | 20549.91621                             | -211.6160339                                |
| 4.28377078                             | 121.1121646                                      | 668.5916443                          | 14668.15642                             | -177.2841293                                |
| 3.924699911                            | 96.57261203                                      | 690.173584                           | 9326.269395                             | -133.0159149                                |
| 4.362997564                            | 134.3762449                                      | 749.4511719                          | 18056.97521                             | -177.900351                                 |
| 4.43631757                             | 135.5928195                                      | 938.1765137                          | 18385.41269                             | -163.707605                                 |
| 3.848965951                            | 89.81156104                                      | 694.9729614                          | 8066.116497                             | -105.4977234                                |
| 3.832456355                            | 94.20139773                                      | 842.7633972                          | 8873.903334                             | -124.741272                                 |
| 4.221619637                            | 122.928247                                       | 541.2435455                          | 15111.35392                             | -198.1556664                                |
| 4.426386952                            | 135.9878225                                      | 941.6963501                          | 18492.68787                             | -142.0220795                                |
| 4.39893005                             | 140.3285594                                      | 733.0084534                          | 19692.10459                             | -234.8149124                                |
| 4.455941165                            | 140.1019294                                      | 850.1445313                          | 19628.55061                             | -180.2949677                                |
| 4.197150983                            | 126.3311739                                      | 601.0553131                          | 15959.56549                             | -217.3581009                                |
| 4.420347314                            | 135.3521158                                      | 785.8426514                          | 18320.19524                             | -165.3066559                                |
| 4.339735078                            | 130.5785574                                      | 707.0428772                          | 17050.75964                             | -163.4417496                                |
| 4.333138691                            | 131.7637628                                      | 658.1947632                          | 17361.68918                             | -192.7070801                                |
| 4.085315666                            | 107.6274964                                      | 710.6123657                          | 11583.67797                             | -136.0819138                                |
| 3.970875355                            | 98.94133207                                      | 667.6647034                          | 9789.387192                             | -135.3992615                                |
| 4.044923079                            | 106.5370462                                      | 979.6350098                          | 11350.14221                             | -116.5255272                                |
| 4.581048217                            | 155.1262821                                      | 791.1098938                          | 24064.16341                             | -227.1208954                                |
| 4.337523086                            | 128.4354647                                      | 719.1292725                          | 16495.6686                              | -198.491214                                 |
| 4.306401049                            | 134.8351068                                      | 620.8167419                          | 18180.50604                             | -197.8277878                                |
| 4.413965295                            | 135.9036598                                      | 729.6322632                          | 18469.80476                             | -205.2922989                                |
| 4.288840112                            | 125.1086754                                      | 800.4162292                          | 15652.18066                             | -169.8246155                                |
| 4.637977928                            | 164.5735389                                      | 790.2669983                          | 27084.44969                             | -275.7652649                                |
| 4.737837163                            | 169.9367653                                      | 885.8108826                          | 28878.5042                              | -235.7807922                                |
| 4.489246428                            | 139.5963334                                      | 991.734375                           | 19487.13629                             | -168.1974014                                |
| 4.254818352                            | 138.9626768                                      | 701.6220703                          | 19310.62553                             | -175.414505                                 |
| 4.155062                               | 112.820292                                       | 644.5355225                          | 12728.41828                             | -134.8942261                                |
| 3.935048421                            | 97.69275199                                      | 1010.370636                          | 9543.873791                             | -106.7587624                                |
| 4.346007277                            | 135.1440328                                      | 661.5011597                          | 18263.90961                             | -184.5018951                                |
| 4.503599386                            | 155.001277                                       | 790.5447388                          | 24025.39588                             | -248.6902802                                |
| 3.932276888                            | 99.92964447                                      | 482.9354706                          | 9985.933843                             | -116.5106003                                |
| 3.949603479                            | 133.4778143                                      | 561.0410156                          | 17816.32692                             | -232.3206726                                |
| 4.337267316                            | 126.4784276                                      | 940.2226257                          | 15996.79264                             | -159.5005005                                |
| 4.583918379                            | 159.200072                                       | 887.5277405                          | 25344.66293                             | -227.9473801                                |
| 4.150818369                            | 113.6956879                                      | 721.2521667                          | 12926.70945                             | -158.3729324                                |
| 4.133570279                            | 108.7289148                                      | 692.7998352                          | 11821.97691                             | -143.3727921                                |
| 4.047914077                            | 101.9507019                                      | 668.6427612                          | 10393.94562                             | -131.2022934                                |
| 4.866161569                            | 208.5757632                                      | 902.7818909                          | 43503.84898                             | -306.6196594                                |
| 4.29923736                             | 122.5654584                                      | 753.791748                           | 15022.29159                             | -152.2835922                                |
| 4.412799955                            | 149.0120659                                      | 681.7763367                          | 22204.5958                              | -199.6974182                                |
| 4.070624663                            | 108.0854406                                      | 541.9129333                          | 11682.46248                             | -135.8902374                                |
| 4.421269519                            | 143.8052758                                      | 872.8662109                          | 20679.95734                             | -183.1341583                                |

| log.sigma.2.5.mm.3D_firstorder_Kurtosis | log.sigma.2.5.mm.3D_firstorder_Mean | log.sigma.2.5.mm.3D_glrIm_ShortRunLowGrayLevelEmphasis | log.sigma.2.5.mm.3D_glrIm_GrayLevelVariance |
|-----------------------------------------|-------------------------------------|--------------------------------------------------------|---------------------------------------------|
| 2.673946701                             | -12.68632936                        | 0.01063786                                             | 30.13125545                                 |
| 3.230750174                             | -9.352638917                        | 0.006227381                                            | 22.18034236                                 |
| 3.08954995                              | -21.24254837                        | 0.012711063                                            | 27.14140752                                 |
| 2.520370855                             | 18.85891682                         | 0.005141563                                            | 34.77841772                                 |
| 2.879998227                             | 2.501084419                         | 0.009906694                                            | 33.94193289                                 |
| 2.198746677                             | -35.18170221                        | 0.017005015                                            | 18.78034763                                 |
| 3.820667505                             | -5.556700532                        | 0.009458358                                            | 12.94885321                                 |
| 2.111762207                             | -11.75926725                        | 0.01774961                                             | 40.01535199                                 |
| 2.496915914                             | -20.58953428                        | 0.008522665                                            | 35.97330706                                 |
| 3.405479982                             | -18.34434132                        | 0.006370797                                            | 20.96450361                                 |
| 2.194955938                             | -24.65910613                        | 0.007026076                                            | 20.54380546                                 |
| 2.760333138                             | -11.43817043                        | 0.011030483                                            | 26.13296812                                 |
| 2.88412801                              | 6.822396994                         | 0.013558449                                            | 20.29333677                                 |
| 2.162145342                             | 3.615606418                         | 0.017456555                                            | 22.74948168                                 |
| 2.651105791                             | 15.05446808                         | 0.009785                                               | 22.48510712                                 |
| 6.17604768                              | 3.961009124                         | 0.007844188                                            | 12.88675                                    |
| 2.120076798                             | -20.72790993                        | 0.013697791                                            | 29.11613642                                 |
| 2.682801145                             | -5.507894884                        | 0.016843093                                            | 25.88278502                                 |
| 2.184324383                             | 12.01577736                         | 0.01995191                                             | 37.050143                                   |
| 2.993979457                             | -4.519617921                        | 0.015565609                                            | 14.59951719                                 |
| 3.497707797                             | -22.17902762                        | 0.007135337                                            | 15.94068145                                 |
| 2.912983602                             | 7.771889648                         | 0.009313539                                            | 26.17023487                                 |
| 2.925036804                             | -13.55028528                        | 0.011778449                                            | 20.2452731                                  |
| 3.136897691                             | 10.96910293                         | 0.009806744                                            | 28.97702513                                 |
| 3.701851988                             | -35.34929558                        | 0.010450402                                            | 18.03395886                                 |
| 2.844395337                             | -28.55173244                        | 0.009731877                                            | 31.26919593                                 |
| 4.636417948                             | -5.197292507                        | 0.003858639                                            | 15.36647448                                 |
| 3.069718706                             | -31.51372237                        | 0.011628859                                            | 23.28366738                                 |
| 1.815814668                             | 10.20438553                         | 0.010032043                                            | 34.6593144                                  |
| 4.027291675                             | -30.01437414                        | 0.007185245                                            | 21.25840274                                 |
| 3.270746196                             | -26.30680335                        | 0.008159465                                            | 18.1086503                                  |
| 3.071437898                             | 7.448399516                         | 0.011947331                                            | 18.61295404                                 |
| 2.384401029                             | 3.011738754                         | 0.009149853                                            | 31.26534227                                 |
| 3.553401                                | 8.885452542                         | 0.01433724                                             | 38.5201764                                  |
| 2.225872799                             | -6.075173425                        | 0.015339984                                            | 37.87121893                                 |
| 2.082213749                             | -9.455414339                        | 0.005780084                                            | 25.07653164                                 |
| 2.858136634                             | -13.15789452                        | 0.008135359                                            | 29.38899148                                 |
| 2.632089702                             | 1.624207286                         | 0.010225793                                            | 19.68683867                                 |
| 2.997671779                             | 11.89586486                         | 0.007869158                                            | 23.62141537                                 |
| 2.383997509                             | -16.22425359                        | 0.010060578                                            | 27.42125645                                 |
| 2.826716065                             | -10.22677578                        | 0.014268267                                            | 20.62244944                                 |
| 2.360349584                             | -16.57451179                        | 0.014409932                                            | 30.35001469                                 |
| 2.069813148                             | -17.94611622                        | 0.007034101                                            | 28.35619341                                 |
| 2.411332744                             | -5.891554266                        | 0.007234078                                            | 34.9869498                                  |
| 2.388387369                             | -10.25935852                        | 0.00905587                                             | 24.85214938                                 |
| 2.561234055                             | -14.81341708                        | 0.021617388                                            | 14.09564498                                 |
| 2.734707847                             | 6.837592335                         | 0.005501052                                            | 28.0198063                                  |
| 2.0913823                               | -27.02815052                        | 0.020526863                                            | 25.76030089                                 |
| 4.47391208                              | 0.847091967                         | 0.012994303                                            | 36.62104486                                 |
| 3.087935635                             | 7.284816831                         | 0.017639814                                            | 34.40689507                                 |
| 3.083406511                             | -5.823097691                        | 0.00690235                                             | 20.62521864                                 |
| 1.581656007                             | -37.58477808                        | 0.018840716                                            | 28.80085095                                 |
| 2.872266444                             | -7.254734493                        | 0.003931418                                            | 26.25930401                                 |
| 2.425166595                             | 4.047607287                         | 0.01531099                                             | 18.0927406                                  |
| 3.507677066                             | 0.467679494                         | 0.012132545                                            | 17.36000651                                 |
| 2.264792725                             | -18.71828206                        | 0.010073845                                            | 39.48033382                                 |
| 2.286799718                             | -15.22666419                        | 0.007813952                                            | 43.64126436                                 |
| 3.151381362                             | 1.103025018                         | 0.008007868                                            | 33.51724955                                 |
| 2.566310271                             | -21.89737175                        | 0.011300062                                            | 24.3724182                                  |
| 2.891988136                             | -12.26607289                        | 0.004709291                                            | 14.97516103                                 |
| 2.396616907                             | -19.55550938                        | 0.009535709                                            | 29.21993926                                 |
| 3.533188205                             | 6.027698775                         | 0.007722171                                            | 30.42873893                                 |
| 3.534458847                             | 10.19384984                         | 0.007887079                                            | 13.79024022                                 |
| 3.760727566                             | -9.200583977                        | 0.002472731                                            | 15.58857483                                 |
| 2.29003381                              | -24.8933824                         | 0.020126598                                            | 24.47526897                                 |
| 3.560347983                             | 27.78388299                         | 0.00768511                                             | 30.45254425                                 |
| 2.5218412                               | -23.73135945                        | 0.011673663                                            | 31.66419864                                 |
| 2.381509595                             | -2.864010483                        | 0.004753392                                            | 31.87206576                                 |
| 1.93733554                              | -42.21267991                        | 0.010789449                                            | 25.27837039                                 |
| 2.588018778                             | -3.627692931                        | 0.009838322                                            | 29.81073634                                 |
| 2.374311935                             | -8.651835455                        | 0.007958499                                            | 27.76479056                                 |
| 2.216712945                             | -23.80282219                        | 0.01436058                                             | 28.11006256                                 |
| 3.270735944                             | -8.502991748                        | 0.00642524                                             | 19.58554999                                 |
| 3.104329218                             | -16.8051174                         | 0.006612866                                            | 16.54197981                                 |
| 4.458669196                             | 12.53183576                         | 0.002879767                                            | 19.55858807                                 |
| 2.157778224                             | -23.46982747                        | 0.009750956                                            | 38.49147765                                 |
| 2.368662074                             | -28.26160242                        | 0.010208122                                            | 26.48528732                                 |
| 2.316873504                             | -38.15076279                        | 0.01479918                                             | 29.35693246                                 |
| 2.226381257                             | -39.7849371                         | 0.0072911                                              | 29.83376207                                 |
| 2.520822424                             | -19.48384227                        | 0.00944917                                             | 25.49746515                                 |
| 2.048402693                             | -61.81662672                        | 0.014673259                                            | 43.39808604                                 |
| 2.263012944                             | -6.362604756                        | 0.008442586                                            | 46.3786199                                  |
| 2.762621587                             | 19.76602687                         | 0.003115915                                            | 31.8879579                                  |
| 3.823055311                             | 17.82559037                         | 0.01309464                                             | 31.84973359                                 |
| 2.386378372                             | 2.363700411                         | 0.009750509                                            | 20.53781433                                 |
| 4.831070488                             | -0.686356769                        | 0.003755668                                            | 16.36604677                                 |
| 2.258670131                             | -23.7534819                         | 0.014012327                                            | 29.58814632                                 |
| 2.113517239                             | -19.54587085                        | 0.005468169                                            | 38.36803741                                 |
| 2.424257769                             | 7.432310357                         | 0.018888313                                            | 16.17691611                                 |
| 2.841463356                             | -45.70723136                        | 0.025707072                                            | 29.35779621                                 |
| 3.338328834                             | -3.56116806                         | 0.002689881                                            | 27.05311238                                 |
| 2.725812846                             | -44.03062366                        | 0.008550606                                            | 41.26342963                                 |
| 2.895969509                             | -14.01119477                        | 0.005631281                                            | 22.23510424                                 |
| 3.080656539                             | -11.11623006                        | 0.013225386                                            | 19.7530733                                  |
| 2.863883849                             | -5.566725579                        | 0.009544258                                            | 17.28262554                                 |
| 1.937696569                             | -33.56590276                        | 0.013145401                                            | 69.53260059                                 |
| 2.999090924                             | 14.67001578                         | 0.005332797                                            | 24.58978432                                 |
| 3.032345831                             | 6.147649156                         | 0.024890576                                            | 35.95324135                                 |
| 2.791462047                             | 18.603552                           | 0.023406568                                            | 18.80533201                                 |
| 4.050258559                             | -25.81901102                        | 0.014168736                                            | 34.57548141                                 |

| log.sigma.2.5.mm.3D_glrIm_LowGrayLevelRunEmphasis | log.sigma.2.5.mm.3D_glrIm_GrayLevelNonUniformityNormalized | log.sigma.2.5.mm.3D_glrIm_RunVariance | log.sigma.2.5.mm.3D_glrIm_GrayLevelNonUniformity |
|---------------------------------------------------|------------------------------------------------------------|---------------------------------------|--------------------------------------------------|
| 0.011104866                                       | 0.052038102                                                | 0.074479484                           | 34.3730763                                       |
| 0.006711866                                       | 0.064870287                                                | 0.210738316                           | 118.0803617                                      |
| 0.013258438                                       | 0.058288614                                                | 0.067012674                           | 23.858856                                        |
| 0.005353005                                       | 0.046670944                                                | 0.07875281                            | 115.0538834                                      |
| 0.010136459                                       | 0.052097601                                                | 0.073164087                           | 17.58355523                                      |
| 0.017947229                                       | 0.064488506                                                | 0.085321525                           | 38.5174695                                       |
| 0.009819494                                       | 0.092702408                                                | 0.099897386                           | 28.7555678                                       |
| 0.018463343                                       | 0.046163199                                                | 0.066893779                           | 43.63553944                                      |
| 0.008916833                                       | 0.046136057                                                | 0.077603972                           | 89.65063337                                      |
| 0.006792154                                       | 0.067176567                                                | 0.11731519                            | 189.5542193                                      |
| 0.007337659                                       | 0.066597498                                                | 0.091246258                           | 51.17200349                                      |
| 0.011619543                                       | 0.056793469                                                | 0.096556222                           | 77.61842675                                      |
| 0.014347212                                       | 0.063227646                                                | 0.093315575                           | 121.0068027                                      |
| 0.018406014                                       | 0.060113428                                                | 0.084324244                           | 62.50429292                                      |
| 0.010103861                                       | 0.058977294                                                | 0.070735752                           | 50.44281219                                      |
| 0.00885697                                        | 0.113107114                                                | 0.416327751                           | 638.8679952                                      |
| 0.014229091                                       | 0.053605247                                                | 0.073087921                           | 35.11375223                                      |
| 0.01807792                                        | 0.057028623                                                | 0.122569888                           | 120.9665488                                      |
| 0.020830864                                       | 0.046665872                                                | 0.075928496                           | 25.41190751                                      |
| 0.016975105                                       | 0.074825788                                                | 0.221371842                           | 182.4451537                                      |
| 0.007716032                                       | 0.077211978                                                | 0.192450512                           | 355.4124456                                      |
| 0.00976298                                        | 0.055637093                                                | 0.078500209                           | 89.61363877                                      |
| 0.01252077                                        | 0.06567458                                                 | 0.10979001                            | 164.5630519                                      |
| 0.010019988                                       | 0.056331799                                                | 0.072235142                           | 25.40315434                                      |
| 0.011109418                                       | 0.072732602                                                | 0.118223584                           | 80.02989065                                      |
| 0.010240691                                       | 0.052203435                                                | 0.099520525                           | 33.41909855                                      |
| 0.004256871                                       | 0.08450391                                                 | 0.273659985                           | 249.8921784                                      |
| 0.012272988                                       | 0.064901691                                                | 0.104391399                           | 85.85292697                                      |
| 0.010468396                                       | 0.051832986                                                | 0.08288457                            | 85.58304388                                      |
| 0.007759452                                       | 0.066929213                                                | 0.239077724                           | 147.9849011                                      |
| 0.008706826                                       | 0.071812441                                                | 0.120632578                           | 208.2883239                                      |
| 0.012900696                                       | 0.068705635                                                | 0.164545175                           | 363.8199867                                      |
| 0.009637207                                       | 0.0505153                                                  | 0.089001631                           | 95.29420731                                      |
| 0.014443628                                       | 0.056839369                                                | 0.04380824                            | 5.680683397                                      |
| 0.015859253                                       | 0.047032934                                                | 0.059143243                           | 14.80554928                                      |
| 0.006098118                                       | 0.05534462                                                 | 0.093898058                           | 103.8699563                                      |
| 0.00865996                                        | 0.055629251                                                | 0.129708918                           | 146.4495625                                      |
| 0.01076501                                        | 0.062527825                                                | 0.112324849                           | 191.9601499                                      |
| 0.008168853                                       | 0.061588858                                                | 0.087531524                           | 47.81120973                                      |
| 0.010578639                                       | 0.053604889                                                | 0.085735939                           | 52.32591218                                      |
| 0.01516464                                        | 0.062803657                                                | 0.129451964                           | 83.84102858                                      |
| 0.014934563                                       | 0.05309371                                                 | 0.071427844                           | 47.56475338                                      |
| 0.007371581                                       | 0.055643717                                                | 0.082822449                           | 85.08514672                                      |
| 0.007605086                                       | 0.047980011                                                | 0.077309667                           | 45.9180098                                       |
| 0.009505054                                       | 0.055647547                                                | 0.070290183                           | 98.28501151                                      |
| 0.02350036                                        | 0.07822826                                                 | 0.145151218                           | 156.5314475                                      |
| 0.005760134                                       | 0.052490712                                                | 0.087387046                           | 208.2900886                                      |
| 0.021784883                                       | 0.054957116                                                | 0.071981742                           | 30.069217                                        |
| 0.013111611                                       | 0.086433095                                                | 0.077323731                           | 10.82599373                                      |
| 0.018717512                                       | 0.060548506                                                | 0.079551808                           | 28.03467903                                      |
| 0.00737067                                        | 0.062869144                                                | 0.142764904                           | 195.0753768                                      |
| 0.019922775                                       | 0.063412148                                                | 0.095501027                           | 48.5508314                                       |
| 0.004205553                                       | 0.055201267                                                | 0.140214902                           | 190.6299113                                      |
| 0.01614092                                        | 0.065449743                                                | 0.089102697                           | 35.84654278                                      |
| 0.013285791                                       | 0.080024013                                                | 0.257380673                           | 449.4355223                                      |
| 0.010374357                                       | 0.044362133                                                | 0.056940541                           | 36.997531                                        |
| 0.008141829                                       | 0.04234496                                                 | 0.069415288                           | 87.58065757                                      |
| 0.008217841                                       | 0.055148156                                                | 0.074129577                           | 66.8503134                                       |
| 0.011907107                                       | 0.056806011                                                | 0.121134309                           | 42.11825511                                      |
| 0.004950244                                       | 0.072918779                                                | 0.10804262                            | 58.72867761                                      |
| 0.010078011                                       | 0.054223066                                                | 0.085990207                           | 106.9060055                                      |
| 0.008170034                                       | 0.052311919                                                | 0.118371163                           | 262.3241739                                      |
| 0.008561146                                       | 0.081412837                                                | 0.195416033                           | 221.8620383                                      |
| 0.002712231                                       | 0.081896129                                                | 0.313908612                           | 188.0711965                                      |
| 0.021107015                                       | 0.059089529                                                | 0.074147966                           | 12.02798551                                      |
| 0.008034155                                       | 0.05655431                                                 | 0.086157326                           | 81.82024544                                      |
| 0.012004388                                       | 0.05611548                                                 | 0.057358099                           | 20.95918451                                      |
| 0.0050457                                         | 0.04983956                                                 | 0.106714473                           | 146.7882176                                      |
| 0.01129644                                        | 0.059703889                                                | 0.079270955                           | 24.89881173                                      |
| 0.010275748                                       | 0.052281869                                                | 0.086544384                           | 97.73615592                                      |
| 0.008459417                                       | 0.054932654                                                | 0.102213518                           | 154.0973311                                      |
| 0.015170477                                       | 0.054736257                                                | 0.087219802                           | 57.34982633                                      |
| 0.006986349                                       | 0.067070689                                                | 0.19259002                            | 306.3871801                                      |
| 0.007182488                                       | 0.073489411                                                | 0.195095776                           | 435.8994673                                      |
| 0.003114429                                       | 0.075235041                                                | 0.182514076                           | 609.3355982                                      |
| 0.010152682                                       | 0.046203553                                                | 0.064036718                           | 48.79816123                                      |
| 0.010686993                                       | 0.055060786                                                | 0.081290248                           | 57.16425218                                      |
| 0.01562115                                        | 0.055395713                                                | 0.076765579                           | 31.62078543                                      |
| 0.0076267                                         | 0.051718805                                                | 0.082605692                           | 85.20871242                                      |
| 0.009949281                                       | 0.057180263                                                | 0.100192967                           | 150.1400403                                      |
| 0.015073186                                       | 0.043708545                                                | 0.056494344                           | 21.00597638                                      |
| 0.008646874                                       | 0.041603518                                                | 0.051210319                           | 53.22921519                                      |
| 0.003250619                                       | 0.051022472                                                | 0.087190476                           | 132.861231                                       |
| 0.013231359                                       | 0.06453939                                                 | 0.065074162                           | 8.823331911                                      |
| 0.010408142                                       | 0.061941968                                                | 0.107557402                           | 192.7765345                                      |
| 0.004102348                                       | 0.078192963                                                | 0.193249288                           | 374.9025743                                      |
| 0.014778007                                       | 0.054343588                                                | 0.079989976                           | 39.49580472                                      |
| 0.005681618                                       | 0.049952449                                                | 0.071319448                           | 73.00373129                                      |
| 0.019499244                                       | 0.072634248                                                | 0.093737444                           | 12.28036793                                      |
| 0.026440539                                       | 0.081851106                                                | 0.055512341                           | 8.201614828                                      |
| 0.002862993                                       | 0.057182434                                                | 0.176371885                           | 202.9005857                                      |
| 0.008855902                                       | 0.047095472                                                | 0.069098206                           | 31.34212766                                      |
| 0.005954357                                       | 0.062464384                                                | 0.210740343                           | 56.43942148                                      |
| 0.014092226                                       | 0.064683792                                                | 0.15937354                            | 237.019777                                       |
| 0.010314144                                       | 0.067585356                                                | 0.155007289                           | 351.3232088                                      |
| 0.013407923                                       | 0.037800187                                                | 0.049521787                           | 9.150480559                                      |
| 0.005528239                                       | 0.059103312                                                | 0.084749177                           | 66.8957009                                       |
| 0.025540981                                       | 0.056191082                                                | 0.036808975                           | 65.67024379                                      |
| 0.024752952                                       | 0.070639554                                                | 0.09256879                            | 24.68567509                                      |
| 0.01474394                                        | 0.056128964                                                | 0.10353869                            | 41.66841206                                      |

| log.sigma.2.5.mm.3D_glrIm_LongRunEmphasis | log.sigma.2.5.mm.3D_glrIm_ShortRunHighGrayLevelEmphasis | log.sigma.2.5.mm.3D_glrIm_RunLengthNonUniformity | log.sigma.2.5.mm.3D_glrIm_ShortRunEmphasis |
|-------------------------------------------|---------------------------------------------------------|--------------------------------------------------|--------------------------------------------|
| 1.218547575                               | 219.9684842                                             | 581.1164939                                      | 0.950881763                                |
| 1.518831903                               | 231.7042957                                             | 1454.468744                                      | 0.912685108                                |
| 1.193463446                               | 184.0495991                                             | 366.3314033                                      | 0.957138138                                |
| 1.222680787                               | 351.9455386                                             | 2174.707281                                      | 0.951868571                                |
| 1.207434089                               | 296.0077231                                             | 300.5536825                                      | 0.955053734                                |
| 1.245885025                               | 137.2162041                                             | 519.8367846                                      | 0.946411109                                |
| 1.284296577                               | 202.4589916                                             | 265.5242558                                      | 0.939719989                                |
| 1.191678748                               | 228.7854518                                             | 846.5875587                                      | 0.957703514                                |
| 1.223120824                               | 270.2348427                                             | 1708.446341                                      | 0.950827926                                |
| 1.324461309                               | 228.2538718                                             | 2375.770784                                      | 0.933804144                                |
| 1.253302041                               | 247.9539284                                             | 670.7560543                                      | 0.947201362                                |
| 1.275109184                               | 189.3693093                                             | 1173.943356                                      | 0.941249256                                |
| 1.270605097                               | 151.0880248                                             | 1644.107433                                      | 0.941223942                                |
| 1.242161488                               | 152.0262366                                             | 906.0446786                                      | 0.947072806                                |
| 1.206597807                               | 211.7149089                                             | 757.8394368                                      | 0.953680398                                |
| 1.950482462                               | 154.5494031                                             | 4020.3295                                        | 0.867498905                                |
| 1.210793381                               | 208.1001323                                             | 581.3860882                                      | 0.953795599                                |
| 1.333977403                               | 147.6981126                                             | 1784.407994                                      | 0.933133694                                |
| 1.220068391                               | 224.6776978                                             | 479.9419908                                      | 0.95127332                                 |
| 1.548261687                               | 112.9088461                                             | 1922.543664                                      | 0.907378869                                |
| 1.48425812                                | 188.5821665                                             | 3699.143656                                      | 0.915272553                                |
| 1.221121171                               | 209.6256879                                             | 1424.312645                                      | 0.952588446                                |
| 1.299713057                               | 157.788034                                              | 2141.508616                                      | 0.939397501                                |
| 1.211653459                               | 332.4684841                                             | 398.5669061                                      | 0.95260101                                 |
| 1.31936477                                | 158.3375728                                             | 934.2208159                                      | 0.936592973                                |
| 1.276266172                               | 229.0364132                                             | 551.8142553                                      | 0.942845707                                |
| 1.655500481                               | 286.8195974                                             | 2257.246059                                      | 0.89517593                                 |
| 1.282867482                               | 169.058535                                              | 1142.697244                                      | 0.94306043                                 |
| 1.229320907                               | 242.7586095                                             | 1460.473522                                      | 0.952301128                                |
| 1.567467384                               | 207.3334296                                             | 1749.629953                                      | 0.909119334                                |
| 1.324544065                               | 191.5227205                                             | 2458.195175                                      | 0.936004769                                |
| 1.423218873                               | 150.0905857                                             | 4340.97359                                       | 0.922779828                                |
| 1.251925508                               | 233.6503425                                             | 1638.450027                                      | 0.945862757                                |
| 1.128087533                               | 416.697155                                              | 92.56990359                                      | 0.970594548                                |
| 1.174104539                               | 261.0134298                                             | 284.4952106                                      | 0.960667551                                |
| 1.262167679                               | 270.8899                                                | 1619.670357                                      | 0.944624233                                |
| 1.330658458                               | 216.2531452                                             | 2247.909194                                      | 0.938502081                                |
| 1.308718346                               | 193.7460241                                             | 2609.766561                                      | 0.937158207                                |
| 1.252149012                               | 263.6347317                                             | 678.3233983                                      | 0.946078807                                |
| 1.241841095                               | 211.8447065                                             | 853.2740253                                      | 0.94834886                                 |
| 1.352526142                               | 158.630288                                              | 1115.809559                                      | 0.930464388                                |
| 1.203922312                               | 214.4295499                                             | 797.1997745                                      | 0.95322909                                 |
| 1.238429365                               | 263.6492225                                             | 1336.745256                                      | 0.948045211                                |
| 1.226114229                               | 287.9141767                                             | 839.4412145                                      | 0.949597502                                |
| 1.202019288                               | 241.3456986                                             | 1572.201076                                      | 0.955443524                                |
| 1.390521987                               | 90.21165144                                             | 1650.413983                                      | 0.924867565                                |
| 1.244548797                               | 295.8630565                                             | 3465.219366                                      | 0.947974416                                |
| 1.209501305                               | 151.9248019                                             | 485.1155515                                      | 0.953458793                                |
| 1.225916611                               | 473.9049562                                             | 110.424215                                       | 0.950446348                                |
| 1.233652921                               | 240.0076726                                             | 404.0002504                                      | 0.947776549                                |
| 1.362880621                               | 212.7790193                                             | 2605.462331                                      | 0.932501881                                |
| 1.266188566                               | 162.9644678                                             | 664.1222803                                      | 0.944669467                                |
| 1.367799962                               | 337.6590488                                             | 2883.859779                                      | 0.930129734                                |
| 1.254580573                               | 148.3059855                                             | 474.3468529                                      | 0.944857219                                |
| 1.621326905                               | 138.4298883                                             | 4363.427201                                      | 0.901074086                                |
| 1.168465138                               | 278.9038761                                             | 753.1008453                                      | 0.961083445                                |
| 1.196628078                               | 350.4501064                                             | 1854.543318                                      | 0.957501111                                |
| 1.214174532                               | 355.3394303                                             | 1071.638793                                      | 0.952551668                                |
| 1.328115543                               | 200.6567648                                             | 626.7211739                                      | 0.935207531                                |
| 1.307538192                               | 320.2402113                                             | 680.7091534                                      | 0.934996408                                |
| 1.24267075                                | 210.3595445                                             | 1723.354675                                      | 0.948160916                                |
| 1.314548762                               | 235.3029905                                             | 4275.201232                                      | 0.938369475                                |
| 1.494873462                               | 168.3152602                                             | 2192.229013                                      | 0.914113149                                |
| 1.73962469                                | 450.6667898                                             | 1728.474869                                      | 0.888762973                                |
| 1.213616822                               | 175.8270008                                             | 180.4849298                                      | 0.953377486                                |
| 1.24156914                                | 263.0995132                                             | 1268.205727                                      | 0.949039985                                |
| 1.172874175                               | 263.0107709                                             | 336.7616795                                      | 0.959858678                                |
| 1.28675994                                | 320.5456149                                             | 2538.7517                                        | 0.942746299                                |
| 1.226170936                               | 208.9454633                                             | 367.8066713                                      | 0.951167533                                |
| 1.2459105                                 | 226.6966708                                             | 1629.80732                                       | 0.947186535                                |
| 1.279550719                               | 220.158858                                              | 2421.826522                                      | 0.943114731                                |
| 1.250004944                               | 179.2040045                                             | 910.1549878                                      | 0.945896103                                |
| 1.480465902                               | 206.3875028                                             | 3692.995269                                      | 0.916823713                                |
| 1.482608105                               | 194.5752557                                             | 4789.829371                                      | 0.916815452                                |
| 1.471457805                               | 386.0447476                                             | 6496.965591                                      | 0.914639703                                |
| 1.182168632                               | 300.9202025                                             | 951.8214984                                      | 0.95991968                                 |
| 1.241022925                               | 222.608839                                              | 901.9901981                                      | 0.945810814                                |
| 1.221253894                               | 169.284555                                              | 503.7276062                                      | 0.951652162                                |
| 1.231859321                               | 271.4495879                                             | 1452.142101                                      | 0.950824121                                |
| 1.276790995                               | 204.9619283                                             | 2262.877489                                      | 0.94271731                                 |
| 1.158088292                               | 264.7242039                                             | 439.5927097                                      | 0.965582611                                |
| 1.150388565                               | 367.0408259                                             | 1168.690178                                      | 0.965435827                                |
| 1.23910942                                | 462.7234525                                             | 2289.597492                                      | 0.950393083                                |
| 1.19241337                                | 379.3571484                                             | 122.0987137                                      | 0.95640644                                 |
| 1.297276786                               | 171.5279009                                             | 2660.786085                                      | 0.939281744                                |
| 1.501766342                               | 297.8100619                                             | 3792.341931                                      | 0.909120846                                |
| 1.227518207                               | 183.5354244                                             | 639.6426379                                      | 0.950827276                                |
| 1.200876902                               | 371.5776355                                             | 1306.65614                                       | 0.9567827                                  |
| 1.27395308                                | 144.8756768                                             | 145.6612749                                      | 0.940715744                                |
| 1.156684212                               | 262.4122673                                             | 91.69354986                                      | 0.965725037                                |
| 1.436733864                               | 489.9379724                                             | 2915.04459                                       | 0.923660146                                |
| 1.195699074                               | 283.0300745                                             | 595.512919                                       | 0.957410501                                |
| 1.496531218                               | 286.2221469                                             | 736.0980437                                      | 0.920351827                                |
| 1.409100221                               | 154.6251616                                             | 3018.429498                                      | 0.924746695                                |
| 1.40608106                                | 159.0582104                                             | 4268.644128                                      | 0.923696479                                |
| 1.143514498                               | 389.4741179                                             | 222.6190986                                      | 0.967576105                                |
| 1.240360519                               | 331.5079091                                             | 988.5125693                                      | 0.948120582                                |
| 1.115935814                               | 303.6590438                                             | 109.814429                                       | 0.971016047                                |
| 1.271989658                               | 137.6476589                                             | 299.2824354                                      | 0.939989006                                |
| 1.287656276                               | 234.6689616                                             | 636.3160849                                      | 0.940459257                                |

| log.sigma.2.5.mm.3D_glrIm_LongRunHighGrayLevelEmphasis | log.sigma.2.5.mm.3D_glrIm_RunPercentage | log.sigma.2.5.mm.3D_glrIm_LongRunLowGrayLevelEmphasis | log.sigma.2.5.mm.3D_glrIm_RunEntropy |
|--------------------------------------------------------|-----------------------------------------|-------------------------------------------------------|--------------------------------------|
| 268.285298                                             | 0.93549793                              | 0.013170678                                           | 4.762412057                          |
| 371.5639266                                            | 0.875893485                             | 0.009448988                                           | 4.764990908                          |
| 215.8363767                                            | 0.943105282                             | 0.015709083                                           | 4.574508423                          |
| 445.951775                                             | 0.935542257                             | 0.006338397                                           | 4.930981037                          |
| 372.6244007                                            | 0.940004285                             | 0.011151104                                           | 4.783180241                          |
| 171.3037595                                            | 0.928938868                             | 0.022293242                                           | 4.446504346                          |
| 280.114425                                             | 0.920337822                             | 0.011441944                                           | 4.158654121                          |
| 279.4526694                                            | 0.943344081                             | 0.021590964                                           | 4.88547927                           |
| 340.6971713                                            | 0.934657935                             | 0.010673996                                           | 4.942458764                          |
| 306.6298025                                            | 0.910786115                             | 0.008863925                                           | 4.620727201                          |
| 326.5428095                                            | 0.929029858                             | 0.008831303                                           | 4.428425818                          |
| 242.598299                                             | 0.92219454                              | 0.014387904                                           | 4.726970892                          |
| 198.9767119                                            | 0.92274312                              | 0.017921987                                           | 4.57617523                           |
| 193.3475173                                            | 0.930026146                             | 0.022738701                                           | 4.562055924                          |
| 265.3365043                                            | 0.938782403                             | 0.011506865                                           | 4.588400476                          |
| 321.1447362                                            | 0.811019699                             | 0.015859968                                           | 4.475290721                          |
| 259.5932645                                            | 0.93850562                              | 0.016673843                                           | 4.676232524                          |
| 195.4019534                                            | 0.909552711                             | 0.024297746                                           | 4.749754862                          |
| 280.0156512                                            | 0.935765266                             | 0.024747898                                           | 4.859646983                          |
| 179.4112079                                            | 0.870101337                             | 0.025160348                                           | 4.534077799                          |
| 288.0117808                                            | 0.880919425                             | 0.010948949                                           | 4.536639382                          |
| 260.2495714                                            | 0.936404293                             | 0.011812159                                           | 4.696299761                          |
| 204.064415                                             | 0.917528096                             | 0.016236713                                           | 4.572634539                          |
| 425.8627716                                            | 0.937470014                             | 0.010953663                                           | 4.676362461                          |
| 207.7622113                                            | 0.913685152                             | 0.014423867                                           | 4.454190074                          |
| 293.7142218                                            | 0.92241882                              | 0.01261844                                            | 4.819946026                          |
| 507.533966                                             | 0.852545608                             | 0.006682825                                           | 4.57241302                           |
| 211.6359459                                            | 0.922808524                             | 0.015440692                                           | 4.588701021                          |
| 318.3252151                                            | 0.935410765                             | 0.012583324                                           | 4.744543591                          |
| 346.3074255                                            | 0.869303395                             | 0.011058141                                           | 4.761020441                          |
| 253.4939616                                            | 0.912284947                             | 0.011435657                                           | 4.504738462                          |
| 215.0801354                                            | 0.892774679                             | 0.017887719                                           | 4.616197289                          |
| 302.3475476                                            | 0.927920088                             | 0.011868896                                           | 4.829701749                          |
| 491.9224794                                            | 0.960798817                             | 0.014888446                                           | 4.524934008                          |
| 317.6288144                                            | 0.948100093                             | 0.018068902                                           | 4.782183909                          |
| 358.1327989                                            | 0.925932978                             | 0.007606179                                           | 4.666155017                          |
| 287.4793952                                            | 0.913862179                             | 0.011403003                                           | 4.797133824                          |
| 260.9247199                                            | 0.915256181                             | 0.013376587                                           | 4.609985711                          |
| 349.1816432                                            | 0.929525564                             | 0.00956638                                            | 4.619571185                          |
| 267.704095                                             | 0.930556574                             | 0.013001848                                           | 4.721543994                          |
| 219.9925598                                            | 0.905542219                             | 0.019564733                                           | 4.655391144                          |
| 263.0844945                                            | 0.940027444                             | 0.017298988                                           | 4.733451817                          |
| 343.5619515                                            | 0.931181486                             | 0.008875428                                           | 4.693007301                          |
| 360.9846861                                            | 0.933658537                             | 0.009274134                                           | 4.880151325                          |
| 303.7488292                                            | 0.940444008                             | 0.011427726                                           | 4.646894478                          |
| 122.7189203                                            | 0.897907748                             | 0.033268636                                           | 4.344208516                          |
| 379.4355814                                            | 0.930163367                             | 0.006977157                                           | 4.810870431                          |
| 185.0951071                                            | 0.938514316                             | 0.02737245                                            | 4.592808456                          |
| 615.3011713                                            | 0.934557979                             | 0.013634301                                           | 4.279717229                          |
| 311.6483146                                            | 0.931434762                             | 0.02342111                                            | 4.720940702                          |
| 297.3080701                                            | 0.906160137                             | 0.00979406                                            | 4.654684656                          |
| 220.2396532                                            | 0.925588317                             | 0.024973135                                           | 4.491841114                          |
| 479.3785723                                            | 0.903730397                             | 0.005618007                                           | 4.835605113                          |
| 189.2067601                                            | 0.926721333                             | 0.020058395                                           | 4.455475078                          |
| 233.1195806                                            | 0.859420512                             | 0.020120775                                           | 4.626867133                          |
| 331.8258962                                            | 0.948805461                             | 0.011673998                                           | 4.900950312                          |
| 432.9137679                                            | 0.943140763                             | 0.009599044                                           | 5.014523709                          |
| 461.7220792                                            | 0.93741448                              | 0.009123094                                           | 4.788715008                          |
| 272.1558233                                            | 0.910791911                             | 0.014787301                                           | 4.728284313                          |
| 437.0635947                                            | 0.91417096                              | 0.006119107                                           | 4.356451009                          |
| 263.0643834                                            | 0.930446147                             | 0.012669584                                           | 4.739013732                          |
| 318.3997625                                            | 0.915311596                             | 0.01037434                                            | 4.890875849                          |
| 261.4946599                                            | 0.88085636                              | 0.012337057                                           | 4.453489635                          |
| 872.6417654                                            | 0.84001352                              | 0.00428858                                            | 4.60635087                           |
| 215.6028749                                            | 0.937965261                             | 0.025441363                                           | 4.488809767                          |
| 334.4535092                                            | 0.931348754                             | 0.009639213                                           | 4.800475011                          |
| 319.1354811                                            | 0.947871925                             | 0.013414807                                           | 4.665330034                          |
| 420.0441822                                            | 0.921224225                             | 0.006511571                                           | 4.871064008                          |
| 260.0738036                                            | 0.934977578                             | 0.013750191                                           | 4.508721776                          |
| 288.0752882                                            | 0.929503117                             | 0.012271986                                           | 4.801888882                          |
| 283.1894098                                            | 0.922697368                             | 0.010903242                                           | 4.753207764                          |
| 226.6464664                                            | 0.927982558                             | 0.018909007                                           | 4.708402005                          |
| 315.326625                                             | 0.883528816                             | 0.010152284                                           | 4.672223721                          |
| 299.4681966                                            | 0.88293169                              | 0.010384215                                           | 4.567309667                          |
| 609.2661338                                            | 0.881967488                             | 0.004395658                                           | 4.671984816                          |
| 368.3894483                                            | 0.946374414                             | 0.0119369                                             | 4.867552935                          |
| 286.4790342                                            | 0.929481441                             | 0.012828097                                           | 4.707339168                          |
| 203.745655                                             | 0.935687264                             | 0.01952576                                            | 4.632259259                          |
| 344.8324915                                            | 0.934109541                             | 0.009207426                                           | 4.763183856                          |
| 266.8309706                                            | 0.92259041                              | 0.012361709                                           | 4.707708887                          |
| 304.3598765                                            | 0.953449328                             | 0.016879451                                           | 4.864240821                          |
| 434.4109348                                            | 0.954110021                             | 0.009522811                                           | 4.99550669                           |
| 598.6965845                                            | 0.932527                                | 0.003888335                                           | 4.861801283                          |
| 481.8520455                                            | 0.94270557                              | 0.01381731                                            | 4.497857624                          |
| 226.8192841                                            | 0.917814123                             | 0.013644716                                           | 4.588188748                          |
| 471.041412                                             | 0.875428443                             | 0.006009307                                           | 4.574959338                          |
| 221.1549687                                            | 0.934150682                             | 0.01829141                                            | 4.682969602                          |
| 467.6570882                                            | 0.941613799                             | 0.006652463                                           | 4.821805276                          |
| 201.8607091                                            | 0.923497268                             | 0.022130865                                           | 4.24834729                           |
| 322.6676221                                            | 0.953846154                             | 0.02942508                                            | 4.139441123                          |
| 747.969903                                             | 0.892230285                             | 0.003835323                                           | 4.891500835                          |
| 335.8978667                                            | 0.942580083                             | 0.010284141                                           | 4.888047503                          |
| 454.1219055                                            | 0.883411109                             | 0.007886929                                           | 4.716929166                          |
| 227.4343698                                            | 0.895805906                             | 0.018501999                                           | 4.669933497                          |
| 228.4641789                                            | 0.8952145                               | 0.014365895                                           | 4.58800168                           |
| 452.6290906                                            | 0.956825783                             | 0.014545524                                           | 5.049406016                          |
| 436.9296204                                            | 0.930731275                             | 0.006437542                                           | 4.672909879                          |
| 352.3457336                                            | 0.963101939                             | 0.028142602                                           | 4.555282912                          |
| 182.4461931                                            | 0.922062107                             | 0.030645195                                           | 4.429884836                          |
| 302.3396664                                            | 0.91983605                              | 0.017372479                                           | 4.839281716                          |

| log.sigma.2.5.mm.3D_gIrlm_HighGrayLevelRunEmphasis | log.sigma.2.5.mm.3D_gIrlm_RunLengthNonUniformityNormalized | log.sigma.2.5.mm.3D_gIlszm_GrayLevelVariance |
|----------------------------------------------------|------------------------------------------------------------|----------------------------------------------|
| 228.8585094                                        | 0.87920102                                                 | 36.05002303                                  |
| 251.8125539                                        | 0.798116636                                                | 31.95517879                                  |
| 189.8381171                                        | 0.894032825                                                | 31.28539961                                  |
| 368.790909                                         | 0.881564282                                                | 40.81716071                                  |
| 309.4240358                                        | 0.889465955                                                | 44.58725762                                  |
| 143.513552                                         | 0.869477912                                                | 19.87745473                                  |
| 215.8029947                                        | 0.854705414                                                | 21.15196078                                  |
| 238.0012887                                        | 0.895123282                                                | 41.21945409                                  |
| 283.1139735                                        | 0.878851195                                                | 40.26532675                                  |
| 241.7540855                                        | 0.841339601                                                | 29.24638228                                  |
| 261.493532                                         | 0.871647835                                                | 23.04129225                                  |
| 198.865411                                         | 0.857870338                                                | 32.87929701                                  |
| 159.7149201                                        | 0.857881997                                                | 24.33357547                                  |
| 159.5402115                                        | 0.870637375                                                | 24.22410165                                  |
| 221.5657646                                        | 0.885575525                                                | 29.3270252                                   |
| 175.2747643                                        | 0.710959138                                                | 25.60837979                                  |
| 217.3472241                                        | 0.886461462                                                | 29.84713979                                  |
| 155.8573364                                        | 0.84023892                                                 | 28.49491702                                  |
| 234.6552753                                        | 0.880315098                                                | 38.39460225                                  |
| 122.694514                                         | 0.787117238                                                | 20.21358725                                  |
| 203.4798732                                        | 0.80286728                                                 | 24.8777732                                   |
| 218.579359                                         | 0.883472996                                                | 29.85337218                                  |
| 165.7269132                                        | 0.853855034                                                | 24.53662498                                  |
| 349.4099795                                        | 0.883205301                                                | 34.97721609                                  |
| 166.6705762                                        | 0.848018891                                                | 24.49878688                                  |
| 240.0758763                                        | 0.86142153                                                 | 36.19080753                                  |
| 317.1932019                                        | 0.762468365                                                | 27.86431179                                  |
| 176.3602916                                        | 0.862590216                                                | 30.04728                                     |
| 255.7691124                                        | 0.883308354                                                | 32.67423289                                  |
| 226.1509146                                        | 0.790637859                                                | 33.55518967                                  |
| 201.9071444                                        | 0.846704229                                                | 22.77076442                                  |
| 160.3190077                                        | 0.818625754                                                | 23.04634245                                  |
| 245.9484161                                        | 0.867873645                                                | 35.94013079                                  |
| 430.5100552                                        | 0.925887508                                                | 46.07638889                                  |
| 271.3093369                                        | 0.902630282                                                | 39.30564456                                  |
| 286.0737155                                        | 0.865183241                                                | 25.43797067                                  |
| 227.5534613                                        | 0.852804121                                                | 35.12699983                                  |
| 205.2850079                                        | 0.849093903                                                | 25.97325086                                  |
| 278.822038                                         | 0.87086256                                                 | 29.80114378                                  |
| 221.6953747                                        | 0.873582254                                                | 32.2036648                                   |
| 168.7886435                                        | 0.834734939                                                | 28.77595574                                  |
| 223.3066918                                        | 0.889486718                                                | 32.80804769                                  |
| 277.8179925                                        | 0.873203096                                                | 30.40019312                                  |
| 301.376029                                         | 0.876380801                                                | 36.37155177                                  |
| 252.4586127                                        | 0.889713761                                                | 28.16753172                                  |
| 95.64304868                                        | 0.823172888                                                | 16.29277967                                  |
| 310.6868802                                        | 0.872689727                                                | 35.64349268                                  |
| 158.0586019                                        | 0.885597322                                                | 25.93351652                                  |
| 499.2964939                                        | 0.879993707                                                | 56.24970273                                  |
| 253.001814                                         | 0.872055256                                                | 39.59516886                                  |
| 226.117432                                         | 0.838940518                                                | 26.98986631                                  |
| 172.5345728                                        | 0.866175826                                                | 23.48249923                                  |
| 360.3103361                                        | 0.834043408                                                | 33.63162013                                  |
| 155.7425446                                        | 0.865559247                                                | 19.21293011                                  |
| 151.6002335                                        | 0.775558326                                                | 25.57518068                                  |
| 288.8639791                                        | 0.902627474                                                | 44.40945619                                  |
| 365.0699049                                        | 0.895339565                                                | 44.66934872                                  |
| 374.4945211                                        | 0.883218954                                                | 40.51214586                                  |
| 212.4104227                                        | 0.84478977                                                 | 31.59428916                                  |
| 341.1299914                                        | 0.844046797                                                | 18.50418992                                  |
| 219.9383971                                        | 0.87335643                                                 | 31.03705155                                  |
| 249.1229412                                        | 0.851747051                                                | 39.61991582                                  |
| 182.2355239                                        | 0.802188268                                                | 21.49224332                                  |
| 505.9384303                                        | 0.751252087                                                | 24.48964897                                  |
| 183.0611394                                        | 0.885574205                                                | 26.37006315                                  |
| 275.6611306                                        | 0.875716993                                                | 41.53202638                                  |
| 273.5116791                                        | 0.900507647                                                | 35.57111111                                  |
| 337.3116381                                        | 0.861349877                                                | 33.16700245                                  |
| 218.350465                                         | 0.880702582                                                | 22.98907353                                  |
| 237.6246976                                        | 0.871088416                                                | 35.15229505                                  |
| 231.0348812                                        | 0.862327693                                                | 30.10774998                                  |
| 187.7078448                                        | 0.86803469                                                 | 29.91858558                                  |
| 222.5520756                                        | 0.806755025                                                | 26.51867114                                  |
| 209.9744161                                        | 0.806346663                                                | 23.09676135                                  |
| 420.3844781                                        | 0.801379799                                                | 33.48389795                                  |
| 313.2107018                                        | 0.900453108                                                | 39.55184691                                  |
| 234.3149792                                        | 0.867788658                                                | 28.57904378                                  |
| 175.5515891                                        | 0.881513581                                                | 28.63630008                                  |
| 284.2779332                                        | 0.879944268                                                | 31.64462059                                  |
| 215.7592794                                        | 0.861103759                                                | 30.10545349                                  |
| 271.9500435                                        | 0.914037821                                                | 44.12167126                                  |
| 379.6999758                                        | 0.913080085                                                | 49.86646584                                  |
| 486.0526047                                        | 0.878591557                                                | 39.44151841                                  |
| 398.0771849                                        | 0.892274087                                                | 42.95053254                                  |
| 181.0201194                                        | 0.853861899                                                | 22.02509366                                  |
| 324.6791831                                        | 0.789942647                                                | 27.69863014                                  |
| 190.2262461                                        | 0.879402308                                                | 28.68474048                                  |
| 388.5153253                                        | 0.893339071                                                | 38.39729888                                  |
| 154.6571144                                        | 0.858611672                                                | 19.74502394                                  |
| 272.935375                                         | 0.914583113                                                | 33.27469136                                  |
| 528.4779502                                        | 0.820629854                                                | 39.12869029                                  |
| 292.735853                                         | 0.894424993                                                | 48.68089844                                  |
| 309.574347                                         | 0.814207185                                                | 31.20975449                                  |
| 165.9313051                                        | 0.822651998                                                | 26.84466714                                  |
| 170.2227081                                        | 0.820174299                                                | 23.20188618                                  |
| 400.9618108                                        | 0.918779372                                                | 70.33134342                                  |
| 350.2445372                                        | 0.872887702                                                | 32.99788682                                  |
| 313.3963817                                        | 0.92638205                                                 | 39.89641584                                  |
| 145.8013991                                        | 0.855059221                                                | 23.08956355                                  |
| 246.4689236                                        | 0.85628325                                                 | 50.65063075                                  |



| log.sigma.2.5.mm.3D_glszm_SmallAreaHighGrayLevelEmphasis | log.sigma.2.5.mm.3D_glszm_GrayLevelNonUniformityNormalized | log.sigma.2.5.mm.3D_glszm_SizeZoneNonUniformityNormalized |
|----------------------------------------------------------|------------------------------------------------------------|-----------------------------------------------------------|
| 186.8759702                                              | 0.047554941                                                | 0.382718674                                               |
| 210.2744561                                              | 0.04938053                                                 | 0.402116847                                               |
| 180.6660649                                              | 0.052732289                                                | 0.482778569                                               |
| 246.0044566                                              | 0.043414874                                                | 0.375608062                                               |
| 202.8266888                                              | 0.04360316                                                 | 0.381142916                                               |
| 102.5039736                                              | 0.063319221                                                | 0.347747973                                               |
| 104.3762913                                              | 0.063052672                                                | 0.280084583                                               |
| 174.2803971                                              | 0.043548293                                                | 0.395845058                                               |
| 205.3591691                                              | 0.044090719                                                | 0.377961976                                               |
| 199.8178372                                              | 0.052026826                                                | 0.381866418                                               |
| 143.5129331                                              | 0.061224934                                                | 0.295232494                                               |
| 159.9186981                                              | 0.048365116                                                | 0.39653014                                                |
| 99.3520863                                               | 0.057249059                                                | 0.300886872                                               |
| 114.1506943                                              | 0.056042338                                                | 0.345805993                                               |
| 144.1192526                                              | 0.051098501                                                | 0.364379425                                               |
| 143.8359635                                              | 0.059124535                                                | 0.35651093                                                |
| 149.4852518                                              | 0.051976808                                                | 0.375456538                                               |
| 136.0549104                                              | 0.051968766                                                | 0.373150764                                               |
| 157.134892                                               | 0.045897543                                                | 0.337609329                                               |
| 99.68811206                                              | 0.06164023                                                 | 0.329334796                                               |
| 166.0476467                                              | 0.056245094                                                | 0.370713078                                               |
| 156.9239814                                              | 0.05158111                                                 | 0.340074265                                               |
| 143.3840685                                              | 0.056482395                                                | 0.399465355                                               |
| 231.8096112                                              | 0.050195799                                                | 0.387815949                                               |
| 143.2278492                                              | 0.057953359                                                | 0.407444565                                               |
| 208.1881862                                              | 0.047459667                                                | 0.374818338                                               |
| 241.5106612                                              | 0.054333673                                                | 0.341616553                                               |
| 166.2206386                                              | 0.050897542                                                | 0.442344839                                               |
| 162.8855318                                              | 0.048359111                                                | 0.370816                                                  |
| 194.1125323                                              | 0.048600677                                                | 0.395721508                                               |
| 171.7201634                                              | 0.059185519                                                | 0.390224747                                               |
| 124.8352705                                              | 0.058167553                                                | 0.329946382                                               |
| 167.1139308                                              | 0.04667545                                                 | 0.351683102                                               |
| 266.322838                                               | 0.050555556                                                | 0.422777778                                               |
| 181.9899659                                              | 0.045923816                                                | 0.406906372                                               |
| 169.007378                                               | 0.054292179                                                | 0.318775598                                               |
| 199.8290254                                              | 0.046507072                                                | 0.414244612                                               |
| 148.805714                                               | 0.054532883                                                | 0.360052235                                               |
| 143.9614692                                              | 0.052615943                                                | 0.303568208                                               |
| 174.1145276                                              | 0.049004821                                                | 0.394928947                                               |
| 135.7371689                                              | 0.051777361                                                | 0.387627807                                               |
| 157.4618001                                              | 0.050144157                                                | 0.353948782                                               |
| 177.4608069                                              | 0.050966173                                                | 0.333892617                                               |
| 218.5521465                                              | 0.046325779                                                | 0.370873941                                               |
| 159.9952882                                              | 0.051668829                                                | 0.359804522                                               |
| 80.44964991                                              | 0.069571225                                                | 0.344194342                                               |
| 221.8288497                                              | 0.046015504                                                | 0.381496232                                               |
| 118.0894265                                              | 0.055183403                                                | 0.358090531                                               |
| 270.9844349                                              | 0.049346017                                                | 0.382282996                                               |
| 173.3004865                                              | 0.049280686                                                | 0.378175696                                               |
| 176.1423944                                              | 0.053770845                                                | 0.345898215                                               |
| 104.2944603                                              | 0.059526008                                                | 0.32981225                                                |
| 260.0631879                                              | 0.048618483                                                | 0.340992414                                               |
| 112.2477143                                              | 0.064490282                                                | 0.338110391                                               |
| 124.0253659                                              | 0.056019894                                                | 0.343469967                                               |
| 215.6908604                                              | 0.04182961                                                 | 0.424059704                                               |
| 259.1227512                                              | 0.04136467                                                 | 0.406484604                                               |
| 218.4279368                                              | 0.045824021                                                | 0.369014471                                               |
| 170.5876127                                              | 0.049704184                                                | 0.372137788                                               |
| 188.5413818                                              | 0.073752603                                                | 0.263273636                                               |
| 162.8862265                                              | 0.050167003                                                | 0.357966287                                               |
| 187.8007332                                              | 0.045118375                                                | 0.367472445                                               |
| 132.863517                                               | 0.060942941                                                | 0.320373668                                               |
| 322.3931875                                              | 0.057811515                                                | 0.349202031                                               |
| 129.6734448                                              | 0.058346687                                                | 0.375247431                                               |
| 217.6416538                                              | 0.044034583                                                | 0.374345351                                               |
| 178.5221778                                              | 0.048580247                                                | 0.344320988                                               |
| 247.6552183                                              | 0.048113284                                                | 0.376481601                                               |
| 153.0314072                                              | 0.060431153                                                | 0.378614191                                               |
| 174.8651765                                              | 0.046666409                                                | 0.386431079                                               |
| 183.0065961                                              | 0.049608064                                                | 0.373265091                                               |
| 137.2795807                                              | 0.052607834                                                | 0.356171315                                               |
| 178.7808897                                              | 0.054207961                                                | 0.350711808                                               |
| 161.9086635                                              | 0.058508156                                                | 0.34987346                                                |
| 284.7270968                                              | 0.049483249                                                | 0.35896788                                                |
| 200.8970196                                              | 0.043914747                                                | 0.392382841                                               |
| 159.6585571                                              | 0.052283654                                                | 0.346789479                                               |
| 144.22774                                                | 0.053167274                                                | 0.345213319                                               |
| 196.2767529                                              | 0.049670849                                                | 0.364989133                                               |
| 164.5424399                                              | 0.051025391                                                | 0.375822067                                               |
| 218.2117372                                              | 0.042412764                                                | 0.416637971                                               |
| 265.1885227                                              | 0.039589222                                                | 0.433177172                                               |
| 329.3354695                                              | 0.044027609                                                | 0.383801771                                               |
| 245.2099961                                              | 0.050887574                                                | 0.386035503                                               |
| 128.7828589                                              | 0.058621231                                                | 0.326273608                                               |
| 233.572316                                               | 0.05574205                                                 | 0.335007147                                               |
| 157.5187913                                              | 0.054567474                                                | 0.41700692                                                |
| 235.1412588                                              | 0.045432526                                                | 0.363927336                                               |
| 82.75754531                                              | 0.068783069                                                | 0.302595112                                               |
| 154.1488182                                              | 0.060356653                                                | 0.414266118                                               |
| 345.4858162                                              | 0.045777145                                                | 0.359327954                                               |
| 255.4531602                                              | 0.041757813                                                | 0.433226556                                               |
| 204.3792938                                              | 0.04991016                                                 | 0.358786652                                               |
| 121.8577143                                              | 0.053495546                                                | 0.340692984                                               |
| 135.8112715                                              | 0.057703171                                                | 0.347232556                                               |
| 317.7445885                                              | 0.035587024                                                | 0.498542274                                               |
| 203.0302358                                              | 0.048248581                                                | 0.35097892                                                |
| 207.2016743                                              | 0.054231563                                                | 0.428410584                                               |
| 85.70801487                                              | 0.06310821                                                 | 0.278014102                                               |
| 230.5226802                                              | 0.040495562                                                | 0.467085799                                               |

| log.sigma.2.5.mm.3D_glszm_SizeZoneNonUniformity | log.sigma.2.5.mm.3D_glszm_GrayLevelNonUniformity | log.sigma.2.5.mm.3D_glszm_LargeAreaEmphasis | log.sigma.2.5.mm.3D_glszm_ZoneVariance |
|-------------------------------------------------|--------------------------------------------------|---------------------------------------------|----------------------------------------|
| 111.371134                                      | 13.83848797                                      | 15.91752577                                 | 10.03148286                            |
| 236.0425894                                     | 28.98637138                                      | 201.5417376                                 | 189.021955                             |
| 102.3490566                                     | 11.17924528                                      | 10.21698113                                 | 6.026076896                            |
| 428.5687993                                     | 49.5363716                                       | 16.00613497                                 | 10.67290943                            |
| 65.1754386                                      | 7.456140351                                      | 9.16374269                                  | 4.756198488                            |
| 87.98023715                                     | 16.01976285                                      | 20.13833992                                 | 13.67910763                            |
| 28.56862745                                     | 6.431372549                                      | 32.32352941                                 | 21.40763168                            |
| 179.7136564                                     | 19.77092511                                      | 11.92951542                                 | 7.058452522                            |
| 324.2913753                                     | 37.82983683                                      | 14.77972028                                 | 8.908418505                            |
| 379.1933535                                     | 51.66263847                                      | 98.71097684                                 | 88.97758225                            |
| 89.45544554                                     | 18.55115512                                      | 16.98019802                                 | 9.530721389                            |
| 212.9366853                                     | 25.97206704                                      | 35.30726257                                 | 27.69089604                            |
| 211.5234708                                     | 40.24608819                                      | 29.11237553                                 | 20.4086166                             |
| 145.584323                                      | 23.59382423                                      | 20.96912114                                 | 13.91700566                            |
| 142.8367347                                     | 20.03061224                                      | 13.06887755                                 | 7.667996408                            |
| 412.4831461                                     | 68.40708729                                      | 3859.190147                                 | 3823.13827                             |
| 111.1351351                                     | 15.38513514                                      | 14.16216216                                 | 8.601488313                            |
| 271.2806052                                     | 37.78129298                                      | 64.52269601                                 | 54.23333819                            |
| 82.71428571                                     | 11.24489796                                      | 12.79183673                                 | 7.148788005                            |
| 204.5169082                                     | 38.27858293                                      | 232.5136876                                 | 212.1693751                            |
| 539.7582418                                     | 81.89285714                                      | 492.6387363                                 | 479.7656231                            |
| 234.9913169                                     | 35.64254703                                      | 17.17800289                                 | 10.98215426                            |
| 373.8995726                                     | 52.86752137                                      | 58.40918803                                 | 49.89601025                            |
| 82.21698113                                     | 10.64150943                                      | 12.58962264                                 | 7.441860983                            |
| 180.0904977                                     | 25.61538462                                      | 53.5520362                                  | 46.13195881                            |
| 97.82758621                                     | 12.38697318                                      | 19.79310345                                 | 12.72280207                            |
| 263.7279793                                     | 41.94559585                                      | 527.642487                                  | 507.4856439                            |
| 250.8095238                                     | 28.85890653                                      | 35.39506173                                 | 29.00763012                            |
| 278.112                                         | 36.26933333                                      | 14.46266667                                 | 8.924488889                            |
| 279.7751061                                     | 34.36067893                                      | 254.9222065                                 | 241.9947744                            |
| 420.272052                                      | 63.74280409                                      | 106.461467                                  | 97.74882945                            |
| 561.5687427                                     | 99.00117509                                      | 102.0070505                                 | 89.8678447                             |
| 268.3342071                                     | 35.61336828                                      | 24.6802097                                  | 17.58074374                            |
| 25.36666667                                     | 3.033333333                                      | 4.366666667                                 | 1.362222222                            |
| 64.69811321                                     | 7.301886792                                      | 8.27672956                                  | 3.916775444                            |
| 221.8678161                                     | 37.78735632                                      | 26.54022989                                 | 18.11689127                            |
| 423.7722385                                     | 47.57673509                                      | 56.40469208                                 | 48.47906365                            |
| 389.2164662                                     | 58.95004625                                      | 73.04902868                                 | 63.42238873                            |
| 93.19543974                                     | 16.15309446                                      | 18.96091205                                 | 11.56322083                            |
| 168.6346604                                     | 20.92505855                                      | 20.98594848                                 | 14.95069901                            |
| 181.7974414                                     | 24.28358209                                      | 78.15778252                                 | 68.2802315                             |
| 141.2255639                                     | 20.0075188                                       | 17.55137845                                 | 11.84658388                            |
| 199                                             | 30.37583893                                      | 26.97315436                                 | 19.38294446                            |
| 155.3961814                                     | 19.41050119                                      | 16.25059666                                 | 10.26620947                            |
| 293.6004902                                     | 42.16176471                                      | 12.20588235                                 | 6.909115484                            |
| 212.3679092                                     | 42.92544571                                      | 127.7666126                                 | 114.7271395                            |
| 643.9656398                                     | 77.67417062                                      | 30.7535545                                  | 24.36655595                            |
| 88.80645161                                     | 13.68548387                                      | 12.81854839                                 | 7.292257414                            |
| 22.17241379                                     | 2.862068966                                      | 16.13793103                                 | 10.80023781                            |
| 74.87878788                                     | 9.757575758                                      | 22.41919192                                 | 16.11858484                            |
| 395.0157618                                     | 61.40630473                                      | 58.36252189                                 | 49.37302671                            |
| 93.99649123                                     | 16.96491228                                      | 26.50175439                                 | 18.08157587                            |
| 408.1679198                                     | 58.19632414                                      | 62.2308271                                  | 52.04328002                            |
| 70.66507177                                     | 13.4784689                                       | 23.15311005                                 | 15.15693322                            |
| 462.654046                                      | 75.45879733                                      | 1099.871566                                 | 1076.420664                            |
| 187.4343891                                     | 18.48868778                                      | 9.57239819                                  | 5.617519093                            |
| 416.2402344                                     | 42.35742188                                      | 12.27050781                                 | 7.68405056                             |
| 208.8621908                                     | 25.93639576                                      | 16.57420495                                 | 11.35548265                            |
| 108.2920962                                     | 14.46391753                                      | 35.46391753                                 | 27.63903516                            |
| 64.50204082                                     | 18.06938776                                      | 55.96326531                                 | 43.0326364                             |
| 292.1004902                                     | 40.93627451                                      | 34.30514706                                 | 27.56170553                            |
| 711.4266529                                     | 87.34917355                                      | 66.52272727                                 | 58.51639979                            |
| 241.8821192                                     | 46.01192053                                      | 181.3456954                                 | 164.5953774                            |
| 195.2039356                                     | 32.31663685                                      | 594.6243292                                 | 570.7561228                            |
| 38.65048544                                     | 6.009708738                                      | 9.427184466                                 | 4.988594589                            |
| 227.6019737                                     | 26.77302632                                      | 31.94243421                                 | 25.41810671                            |
| 61.97777778                                     | 8.744444444                                      | 9.4                                         | 4.608765432                            |
| 427.6830986                                     | 54.65669014                                      | 35.26320423                                 | 27.34314171                            |
| 73.07253886                                     | 11.66321244                                      | 14.42487047                                 | 9.08470026                             |
| 311.0770186                                     | 37.56645963                                      | 26.59503106                                 | 20.35434435                            |
| 409.0985401                                     | 54.37043796                                      | 32.45620438                                 | 24.76266716                            |
| 144.2493827                                     | 21.30617284                                      | 29.51358025                                 | 21.74256363                            |
| 481.5273125                                     | 74.42753095                                      | 170.5841224                                 | 156.4167278                            |
| 585.688172                                      | 97.94265233                                      | 325.9139785                                 | 309.8182563                            |
| 898.4966041                                     | 123.8565721                                      | 828.2357171                                 | 814.7844356                            |
| 201.2923977                                     | 22.52826511                                      | 13.66081871                                 | 8.928285626                            |
| 144.2644231                                     | 21.75                                            | 20.57451923                                 | 13.36477788                            |
| 85.61290323                                     | 13.18548387                                      | 17.16129032                                 | 11.11127732                            |
| 260.6022409                                     | 35.46498599                                      | 25.16526611                                 | 19.06145988                            |
| 384.8417969                                     | 52.25                                            | 42.32617188                                 | 34.60168076                            |
| 109.9924242                                     | 11.1969697                                       | 7.590909091                                 | 3.946280992                            |
| 309.7216783                                     | 28.30629371                                      | 6.351048951                                 | 2.833456893                            |
| 447.5128645                                     | 51.33619211                                      | 26.03945111                                 | 20.30576747                            |
| 25.09230769                                     | 3.307692308                                      | 10.16923077                                 | 5.192899408                            |
| 356.9433272                                     | 64.13162706                                      | 42.71572212                                 | 33.1079889                             |
| 440.1993912                                     | 73.24505327                                      | 413.2404871                                 | 395.8730334                            |
| 141.7823529                                     | 18.55294118                                      | 25.24705882                                 | 20.01103806                            |
| 247.4705882                                     | 30.89411765                                      | 11.69411765                                 | 6.484982699                            |
| 19.06349206                                     | 4.333333333                                      | 17.6031746                                  | 9.16553288                             |
| 22.37037037                                     | 3.259259259                                      | 6.240740741                                 | 2.459876543                            |
| 431.5528726                                     | 54.97835137                                      | 193.7843464                                 | 182.8299551                            |
| 138.63125                                       | 13.3625                                          | 14.3                                        | 9.432460938                            |
| 128.0868347                                     | 17.81792717                                      | 69.34453782                                 | 61.14922832                            |
| 410.1943522                                     | 64.40863787                                      | 156.3754153                                 | 144.8357386                            |
| 529.1824147                                     | 87.93963255                                      | 212.9566929                                 | 198.4427928                            |
| 73.28571429                                     | 5.231292517                                      | 5.149659864                                 | 2.187514462                            |
| 162.5032397                                     | 22.33909287                                      | 25.13606911                                 | 18.23835536                            |
| 31.2739726                                      | 3.95890411                                       | 4.123287671                                 | 1.284293488                            |
| 36.41984733                                     | 8.267175573                                      | 17.29007634                                 | 8.919876464                            |
| 145.7307692                                     | 12.63461538                                      | 37.83012821                                 | 31.13994699                            |

| log.sigma.2.5.mm.3D_glszm_ZonePercentage | log.sigma.2.5.mm.3D_glszm_LargeAreaLowGrayLevelEmphasis | log.sigma.2.5.mm.3D_glszm_LargeAreaHighGrayLevelEmphasis | log.sigma.2.5.mm.3D_glszm_HighGrayLevelZoneEmphasis |
|------------------------------------------|---------------------------------------------------------|----------------------------------------------------------|-----------------------------------------------------|
| 0.412181303                              | 0.173706076                                             | 2420.831615                                              | 277.0996564                                         |
| 0.282619162                              | 0.949580492                                             | 45994.83135                                              | 301.1499148                                         |
| 0.488479263                              | 0.132174955                                             | 1356.226415                                              | 230.3349057                                         |
| 0.433017078                              | 0.066386981                                             | 5393.890447                                              | 382.0645055                                         |
| 0.47632312                               | 0.053081998                                             | 2698.918129                                              | 315.3918129                                         |
| 0.393468118                              | 0.356116711                                             | 1851.422925                                              | 163.972332                                          |
| 0.302670623                              | 0.170074189                                             | 7474.215686                                              | 203.4019608                                         |
| 0.453093812                              | 0.196453297                                             | 2232.343612                                              | 259.4647577                                         |
| 0.412698413                              | 0.116658387                                             | 3550.224942                                              | 308.4918415                                         |
| 0.320529374                              | 0.631656992                                             | 17051.39577                                              | 296.12286                                           |
| 0.366384522                              | 0.10015772                                              | 4331.841584                                              | 262.4224422                                         |
| 0.362348178                              | 0.342141343                                             | 4951.964618                                              | 237.8435754                                         |
| 0.338958534                              | 0.380125145                                             | 3670.853485                                              | 173.2916074                                         |
| 0.376565295                              | 0.40541397                                              | 2462.503563                                              | 179.3182898                                         |
| 0.430296378                              | 0.093054926                                             | 2678.280612                                              | 229.7806122                                         |
| 0.166546711                              | 26.1776386                                              | 575819.9283                                              | 221.3422645                                         |
| 0.424068768                              | 0.195594506                                             | 2553.506757                                              | 229.9358108                                         |
| 0.311749571                              | 1.291504399                                             | 5827.072902                                              | 202.4662999                                         |
| 0.420962199                              | 0.249678457                                             | 2167.812245                                              | 255.2653061                                         |
| 0.221706533                              | 3.270285953                                             | 22590.1256                                               | 160.9855072                                         |
| 0.278713629                              | 3.104179058                                             | 81035.76168                                              | 251.6325549                                         |
| 0.401744186                              | 0.161044989                                             | 2918.767004                                              | 247.3198263                                         |
| 0.3427316                                | 0.706716982                                             | 5980.803419                                              | 208.4925214                                         |
| 0.440748441                              | 0.062050083                                             | 4519.471698                                              | 353.5660377                                         |
| 0.367109635                              | 0.531490334                                             | 6225.71267                                               | 204.9208145                                         |
| 0.376080692                              | 0.181985434                                             | 3502.689655                                              | 298.2337165                                         |
| 0.222735141                              | 1.850811739                                             | 153752.8122                                              | 379.3782383                                         |
| 0.395673412                              | 0.358199972                                             | 4197.961199                                              | 224.7654321                                         |
| 0.424929178                              | 0.113772813                                             | 4100.404                                                 | 254.168                                             |
| 0.278127459                              | 1.306187482                                             | 54108.66195                                              | 276.950495                                          |
| 0.338785782                              | 0.814169092                                             | 15196.64345                                              | 252.1652739                                         |
| 0.287015177                              | 1.168887926                                             | 11235.75969                                              | 198.6010576                                         |
| 0.375307427                              | 0.199707374                                             | 5287.547837                                              | 266.9960682                                         |
| 0.576923077                              | 0.032575428                                             | 2016.083333                                              | 410.25                                              |
| 0.478915663                              | 0.119759071                                             | 2070.798742                                              | 275.9622642                                         |
| 0.344554455                              | 0.168565958                                             | 6366.45977                                               | 294.8505747                                         |
| 0.355208333                              | 0.529803317                                             | 7933.397849                                              | 282.1974585                                         |
| 0.322301729                              | 0.550218163                                             | 12366.21647                                              | 235.2719704                                         |
| 0.367664671                              | 0.099588339                                             | 5367.677524                                              | 272.4299674                                         |
| 0.407054337                              | 0.186749119                                             | 3954.920375                                              | 250.440281                                          |
| 0.318181818                              | 0.727454047                                             | 10902.56716                                              | 198.108742                                          |
| 0.418677859                              | 0.21476117                                              | 2774.586466                                              | 245.7192982                                         |
| 0.362971985                              | 0.157530064                                             | 7721.097315                                              | 285.488255                                          |
| 0.408780488                              | 0.11052831                                              | 4364.059666                                              | 333.7899761                                         |
| 0.434504792                              | 0.095147238                                             | 2973.463235                                              | 256.7107843                                         |
| 0.276929982                              | 3.017739764                                             | 6735.440843                                              | 128.8865478                                         |
| 0.395686826                              | 0.141549177                                             | 8212.799171                                              | 336.1563981                                         |
| 0.425385935                              | 0.376384605                                             | 1403.758065                                              | 181.0766129                                         |
| 0.432835821                              | 0.05811281                                              | 8127.448276                                              | 475.7931034                                         |
| 0.398390342                              | 0.288427716                                             | 6029.929293                                              | 260.8232323                                         |
| 0.333528037                              | 0.350322597                                             | 11226.95009                                              | 266.290718                                          |
| 0.344619105                              | 0.607302722                                             | 3950.8                                                   | 178.4631579                                         |
| 0.313268778                              | 0.232979417                                             | 19455.76859                                              | 410.2898914                                         |
| 0.353637902                              | 0.360318111                                             | 2899.334928                                              | 179.2535885                                         |
| 0.206500077                              | 9.408620652                                             | 141992.8344                                              | 192.2093541                                         |
| 0.502844141                              | 0.076857504                                             | 2194.196833                                              | 310.1289593                                         |
| 0.466940264                              | 0.080061469                                             | 4290.834961                                              | 380.9833984                                         |
| 0.437741686                              | 0.064283051                                             | 6844.791519                                              | 355.6060071                                         |
| 0.357493857                              | 0.279330379                                             | 6143.938144                                              | 252.2852234                                         |
| 0.278093076                              | 0.240651817                                             | 14756.38776                                              | 367.355102                                          |
| 0.385087305                              | 0.410089016                                             | 4100.066176                                              | 255.1188725                                         |
| 0.353413655                              | 0.402736397                                             | 13536.8311                                               | 283.018595                                          |
| 0.24433657                               | 1.315792413                                             | 27648.10199                                              | 216.3072848                                         |
| 0.204686928                              | 1.230400618                                             | 295212.7996                                              | 531.1019678                                         |
| 0.474654378                              | 0.1668564                                               | 1366.805825                                              | 200.4563107                                         |
| 0.391500322                              | 0.167545437                                             | 7765.912829                                              | 317.2121711                                         |
| 0.456852792                              | 0.08120426                                              | 2515.838889                                              | 285.2111111                                         |
| 0.355333125                              | 0.18802352                                              | 9082.935739                                              | 384.1355634                                         |
| 0.432735426                              | 0.199086551                                             | 2043.388601                                              | 239.6735751                                         |
| 0.400298359                              | 0.227806165                                             | 4469.198758                                              | 265.5130435                                         |
| 0.360526316                              | 0.312648441                                             | 5019.27281                                               | 275.6760949                                         |
| 0.358724535                              | 0.471432216                                             | 3384.94321                                               | 218.2518519                                         |
| 0.265673375                              | 1.056649332                                             | 32232.34086                                              | 277.1631464                                         |
| 0.249255509                              | 2.081870696                                             | 55018.13321                                              | 258.3178017                                         |
| 0.272657952                              | 2.062047807                                             | 335826.5461                                              | 451.4846185                                         |
| 0.459677419                              | 0.113804523                                             | 3607.448343                                              | 318.0448343                                         |
| 0.372426141                              | 0.18542708                                              | 3947.331731                                              | 253.0745192                                         |
| 0.406557377                              | 0.337981737                                             | 1701.185484                                              | 216.9233871                                         |
| 0.404761905                              | 0.163084977                                             | 5389.239496                                              | 305.7464986                                         |
| 0.359803233                              | 0.361865525                                             | 6642.31543                                               | 247.7832031                                         |
| 0.523809524                              | 0.090904196                                             | 1539.291667                                              | 306.9545455                                         |
| 0.533184191                              | 0.040800665                                             | 2259.798601                                              | 387.2951049                                         |
| 0.417621777                              | 0.063969129                                             | 12241.37993                                              | 503.7590051                                         |
| 0.448275862                              | 0.050026682                                             | 4296.476923                                              | 382.0769231                                         |
| 0.322618697                              | 0.477315194                                             | 5355.920475                                              | 210.547532                                          |
| 0.239956172                              | 1.565258875                                             | 112732.8858                                              | 376.1430746                                         |
| 0.437017995                              | 0.416754968                                             | 2318.214706                                              | 228.1588235                                         |
| 0.43814433                               | 0.060143753                                             | 4355.725                                                 | 384.0838235                                         |
| 0.344262295                              | 0.184675825                                             | 2952.380952                                              | 146.3968254                                         |
| 0.514285714                              | 0.105691235                                             | 1911.888889                                              | 246.7592593                                         |
| 0.302138365                              | 0.399953751                                             | 97567.30891                                              | 555.375204                                          |
| 0.45325779                               | 0.118085242                                             | 2651.728125                                              | 355.5875                                            |
| 0.349315068                              | 0.266455223                                             | 19572.73389                                              | 326.2408964                                         |
| 0.294376528                              | 1.31548821                                              | 22971.49252                                              | 195.9526578                                         |
| 0.262487082                              | 1.781476464                                             | 30554.54462                                              | 213.1496063                                         |
| 0.581027668                              | 0.044750539                                             | 2094.360544                                              | 413.2108844                                         |
| 0.380756579                              | 0.087414996                                             | 8899.090713                                              | 343.1533477                                         |
| 0.593495935                              | 0.082489378                                             | 1342.479452                                              | 306.9726027                                         |
| 0.345646438                              | 0.302899939                                             | 2343.396947                                              | 155.0763359                                         |
| 0.3866171                                | 0.266361247                                             | 7021.288462                                              | 306.7532051                                         |

| log.sigma.2.5.mm.3D_glszm_SmallAreaEmphasis | log.sigma.2.5.mm.3D_glszm_LowGrayLevelZoneEmphasis | log.sigma.2.5.mm.3D_glszm_ZoneEntropy | log.sigma.2.5.mm.3D_glszm_SmallAreaLowGrayLevelEmphasis |
|---------------------------------------------|----------------------------------------------------|---------------------------------------|---------------------------------------------------------|
| 0.641453069                                 | 0.013390952                                        | 6.132307088                           | 0.010567062                                             |
| 0.658818121                                 | 0.007884257                                        | 6.20889269                            | 0.005572889                                             |
| 0.721032236                                 | 0.014380372                                        | 5.719962831                           | 0.011269603                                             |
| 0.63476103                                  | 0.006364649                                        | 6.545304696                           | 0.004625495                                             |
| 0.636600593                                 | 0.014657641                                        | 6.038899448                           | 0.012268532                                             |
| 0.60773856                                  | 0.019981471                                        | 5.790675698                           | 0.012831666                                             |
| 0.539039781                                 | 0.017988467                                        | 5.783493632                           | 0.014784234                                             |
| 0.652913564                                 | 0.020302465                                        | 6.261279362                           | 0.013354814                                             |
| 0.638586875                                 | 0.009493995                                        | 6.531677618                           | 0.00573513                                              |
| 0.641048688                                 | 0.007534095                                        | 6.324459286                           | 0.005385231                                             |
| 0.553369277                                 | 0.009823054                                        | 6.084045809                           | 0.007277416                                             |
| 0.653968249                                 | 0.014321813                                        | 6.217830711                           | 0.010846957                                             |
| 0.564724084                                 | 0.01631399                                         | 6.464021074                           | 0.009371667                                             |
| 0.607803467                                 | 0.018939343                                        | 6.161068208                           | 0.009977563                                             |
| 0.624601757                                 | 0.013716758                                        | 6.153239085                           | 0.010917228                                             |
| 0.619640085                                 | 0.011163737                                        | 6.431184943                           | 0.007595559                                             |
| 0.63337336                                  | 0.018220686                                        | 6.041379856                           | 0.014594201                                             |
| 0.634277183                                 | 0.018170731                                        | 6.326357694                           | 0.013034913                                             |
| 0.599376016                                 | 0.026180204                                        | 6.214794038                           | 0.018167494                                             |
| 0.594624729                                 | 0.019211214                                        | 6.24565332                            | 0.012524221                                             |
| 0.630736214                                 | 0.009078992                                        | 6.299566854                           | 0.006448231                                             |
| 0.599474685                                 | 0.010587985                                        | 6.364349444                           | 0.006980901                                             |
| 0.657133537                                 | 0.013157913                                        | 6.174293577                           | 0.00909454                                              |
| 0.645793448                                 | 0.015447249                                        | 5.956523535                           | 0.012975703                                             |
| 0.661203975                                 | 0.012172474                                        | 5.939711694                           | 0.00855235                                              |
| 0.635546013                                 | 0.011773365                                        | 6.088816407                           | 0.008403829                                             |
| 0.605867671                                 | 0.005264353                                        | 6.460622393                           | 0.003745891                                             |
| 0.691052183                                 | 0.013763207                                        | 5.994342981                           | 0.01021923                                              |
| 0.631779627                                 | 0.011412853                                        | 6.309411271                           | 0.007672062                                             |
| 0.651678127                                 | 0.009060034                                        | 6.287669917                           | 0.006050817                                             |
| 0.647813926                                 | 0.008807673                                        | 6.134313183                           | 0.005482353                                             |
| 0.594453064                                 | 0.01315949                                         | 6.509584449                           | 0.007609307                                             |
| 0.61481889                                  | 0.010265198                                        | 6.523859697                           | 0.006172975                                             |
| 0.670662037                                 | 0.021443791                                        | 5.277316637                           | 0.019808191                                             |
| 0.661850932                                 | 0.018696782                                        | 5.794032566                           | 0.014242858                                             |
| 0.582366921                                 | 0.006967819                                        | 6.417608005                           | 0.004660939                                             |
| 0.669302232                                 | 0.00875027                                         | 6.360943343                           | 0.006131927                                             |
| 0.620518242                                 | 0.013992367                                        | 6.342628313                           | 0.009454182                                             |
| 0.560979854                                 | 0.011890857                                        | 6.298068537                           | 0.009252258                                             |
| 0.652622961                                 | 0.011593909                                        | 6.146240417                           | 0.00800602                                              |
| 0.646920149                                 | 0.020164852                                        | 6.196192298                           | 0.015005411                                             |
| 0.610798009                                 | 0.019671209                                        | 6.218906872                           | 0.014935224                                             |
| 0.5958597                                   | 0.008793405                                        | 6.361892922                           | 0.005709945                                             |
| 0.630743406                                 | 0.008103458                                        | 6.205104012                           | 0.005537373                                             |
| 0.620580039                                 | 0.00960818                                         | 6.339550905                           | 0.005618024                                             |
| 0.608004631                                 | 0.021796046                                        | 6.00569332                            | 0.014036068                                             |
| 0.639709287                                 | 0.006757871                                        | 6.539805871                           | 0.004831437                                             |
| 0.620013654                                 | 0.019959118                                        | 5.957680975                           | 0.012917457                                             |
| 0.627936089                                 | 0.025373602                                        | 5.25419565                            | 0.024291021                                             |
| 0.635792714                                 | 0.018305262                                        | 5.936939396                           | 0.010835716                                             |
| 0.610018907                                 | 0.007759768                                        | 6.509312261                           | 0.004866011                                             |
| 0.593125024                                 | 0.020081528                                        | 5.924294657                           | 0.012655578                                             |
| 0.603264511                                 | 0.004617148                                        | 6.599735748                           | 0.003062468                                             |
| 0.597594063                                 | 0.018235428                                        | 5.831638019                           | 0.011736175                                             |
| 0.60661665                                  | 0.01491734                                         | 6.50243204                            | 0.009180767                                             |
| 0.675602967                                 | 0.012605614                                        | 6.214681498                           | 0.009840056                                             |
| 0.662208556                                 | 0.008201352                                        | 6.48871724                            | 0.004919206                                             |
| 0.627908225                                 | 0.012175419                                        | 6.388112736                           | 0.009939286                                             |
| 0.632985047                                 | 0.014497639                                        | 6.140472988                           | 0.009583571                                             |
| 0.52485884                                  | 0.008031705                                        | 6.071284937                           | 0.006531281                                             |
| 0.618985725                                 | 0.009867619                                        | 6.388369223                           | 0.005785658                                             |
| 0.628215391                                 | 0.009114946                                        | 6.669011905                           | 0.006012603                                             |
| 0.584881931                                 | 0.010093597                                        | 6.372186814                           | 0.00669068                                              |
| 0.611505856                                 | 0.00419752                                         | 6.24007885                            | 0.003329825                                             |
| 0.630366317                                 | 0.024601559                                        | 5.404412057                           | 0.018382079                                             |
| 0.633599813                                 | 0.00935042                                         | 6.467534278                           | 0.00624749                                              |
| 0.599993103                                 | 0.015932145                                        | 5.968696172                           | 0.012656611                                             |
| 0.637192741                                 | 0.005075381                                        | 6.469664031                           | 0.003493166                                             |
| 0.637747273                                 | 0.012953985                                        | 5.662975998                           | 0.010206695                                             |
| 0.645446541                                 | 0.013099096                                        | 6.405547589                           | 0.010175742                                             |
| 0.634118811                                 | 0.008321889                                        | 6.417451164                           | 0.005610998                                             |
| 0.619161398                                 | 0.016658321                                        | 6.223780706                           | 0.011435878                                             |
| 0.613844992                                 | 0.006899949                                        | 6.503296407                           | 0.004308376                                             |
| 0.611649273                                 | 0.007681422                                        | 6.397044762                           | 0.005154922                                             |
| 0.620445564                                 | 0.003739418                                        | 6.632321977                           | 0.002578623                                             |
| 0.647588101                                 | 0.01006846                                         | 6.240596442                           | 0.00597032                                              |
| 0.610414275                                 | 0.013609846                                        | 6.280181963                           | 0.010008854                                             |
| 0.606269853                                 | 0.015013473                                        | 5.998407566                           | 0.00955272                                              |
| 0.62454027                                  | 0.008658214                                        | 6.295413025                           | 0.005742073                                             |
| 0.635869352                                 | 0.011947755                                        | 6.358749378                           | 0.008534068                                             |
| 0.667962223                                 | 0.018260129                                        | 5.988284261                           | 0.014442152                                             |
| 0.683623038                                 | 0.011067165                                        | 6.348798469                           | 0.009272538                                             |
| 0.642050126                                 | 0.003835561                                        | 6.488356159                           | 0.002813934                                             |
| 0.640835603                                 | 0.024023162                                        | 5.255070844                           | 0.022369979                                             |
| 0.591147169                                 | 0.010475323                                        | 6.428047314                           | 0.006597422                                             |
| 0.598823345                                 | 0.004767318                                        | 6.547010471                           | 0.003210983                                             |
| 0.670678773                                 | 0.01518943                                         | 5.871287002                           | 0.010901653                                             |
| 0.624644835                                 | 0.006597967                                        | 6.418423987                           | 0.004659523                                             |
| 0.56491778                                  | 0.032944504                                        | 5.078403884                           | 0.025488055                                             |
| 0.667089763                                 | 0.02796295                                         | 5.129434956                           | 0.012291042                                             |
| 0.621369097                                 | 0.003920321                                        | 6.667779166                           | 0.00302287                                              |
| 0.684190074                                 | 0.010703544                                        | 6.16554657                            | 0.00885154                                              |
| 0.619332208                                 | 0.008451415                                        | 6.226285784                           | 0.006682746                                             |
| 0.601154367                                 | 0.01659653                                         | 6.450153525                           | 0.009682749                                             |
| 0.610270963                                 | 0.010631888                                        | 6.429242919                           | 0.006640655                                             |
| 0.733172609                                 | 0.016915002                                        | 5.815052917                           | 0.014326712                                             |
| 0.612276304                                 | 0.007674592                                        | 6.334413098                           | 0.005796315                                             |
| 0.674015411                                 | 0.024647938                                        | 5.309267368                           | 0.011571033                                             |
| 0.539366348                                 | 0.030331018                                        | 5.803402513                           | 0.014782241                                             |
| 0.710240529                                 | 0.018974291                                        | 6.070124908                           | 0.011873847                                             |

| log.sigma.2.5.mm.3D_ngtdm_Coarseness | log.sigma.2.5.mm.3D_ngtdm_Complexity | log.sigma.2.5.mm.3D_ngtdm_Strength | log.sigma.2.5.mm.3D_ngtdm_Busyness | log.sigma.2.5.mm.3D_ngtdm_Contrast |
|--------------------------------------|--------------------------------------|------------------------------------|------------------------------------|------------------------------------|
| 0.011072098                          | 1.303978024                          | 2.824705097                        | 0.268113751                        | 0.000302805                        |
| 0.00491965                           | 0.390868152                          | 1.366335728                        | 0.412698993                        | 5.05E-05                           |
| 0.016306634                          | 2.223842113                          | 4.754495906                        | 0.204736563                        | 0.000484728                        |
| 0.003096451                          | 0.633414556                          | 1.217961603                        | 0.482064594                        | 6.64E-05                           |
| 0.025662679                          | 2.760533721                          | 8.1347216                          | 0.073642026                        | 0.000480958                        |
| 0.011526228                          | 0.679069977                          | 1.675917081                        | 0.433133119                        | 0.000304505                        |
| 0.021332346                          | 1.09928901                           | 3.681746566                        | 0.129739545                        | 0.000318869                        |
| 0.006780772                          | 1.289311222                          | 2.208561043                        | 0.382243612                        | 0.000297637                        |
| 0.003987305                          | 0.673022344                          | 1.446258998                        | 0.503464419                        | 9.32E-05                           |
| 0.002698605                          | 0.302885752                          | 0.907536189                        | 0.746171929                        | 3.30E-05                           |
| 0.007235688                          | 0.71004237                           | 1.428432176                        | 0.387455047                        | 0.000263291                        |
| 0.005732463                          | 0.52746875                           | 1.334766449                        | 0.573692419                        | 0.000119982                        |
| 0.003899787                          | 0.327534836                          | 0.983589671                        | 0.818054699                        | 6.25E-05                           |
| 0.006637891                          | 0.602608293                          | 1.564350956                        | 0.521658994                        | 0.000152986                        |
| 0.008733666                          | 0.738406411                          | 1.671211601                        | 0.339017842                        | 0.000199876                        |
| 0.001478482                          | 0.103584705                          | 0.803631819                        | 1.119505384                        | 4.44E-06                           |
| 0.010093891                          | 1.276232015                          | 2.659918486                        | 0.267441475                        | 0.000317015                        |
| 0.003658238                          | 0.331318469                          | 1.010268609                        | 1.030550274                        | 6.94E-05                           |
| 0.014016525                          | 1.609173175                          | 3.591298614                        | 0.206464142                        | 0.000474291                        |
| 0.003582819                          | 0.132501367                          | 0.561983034                        | 1.193749471                        | 3.47E-05                           |
| 0.001665982                          | 0.140081975                          | 0.460400489                        | 1.292930822                        | 1.47E-05                           |
| 0.004764747                          | 0.602065081                          | 1.511652309                        | 0.508142642                        | 8.65E-05                           |
| 0.00312853                           | 0.218722342                          | 0.65521937                         | 1.139320671                        | 5.08E-05                           |
| 0.015129452                          | 1.88016985                           | 3.905153952                        | 0.131634209                        | 0.00046992                         |
| 0.006250651                          | 0.639265542                          | 1.754370863                        | 0.477112711                        | 0.000100917                        |
| 0.011965511                          | 1.59878703                           | 3.372026466                        | 0.21551095                         | 0.000286352                        |
| 0.002672743                          | 0.267363328                          | 1.200787799                        | 0.470943557                        | 1.32E-05                           |
| 0.005376402                          | 0.571003343                          | 1.394803783                        | 0.580919415                        | 0.000109572                        |
| 0.003587114                          | 0.619930584                          | 1.092997869                        | 0.634507556                        | 0.000154503                        |
| 0.003899776                          | 0.45915481                           | 1.802028973                        | 0.413293981                        | 2.80E-05                           |
| 0.002454726                          | 0.236340502                          | 0.635885663                        | 1.028578937                        | 3.44E-05                           |
| 0.001597519                          | 0.09740378                           | 0.389828521                        | 1.960447561                        | 1.67E-05                           |
| 0.003730928                          | 0.578985776                          | 1.245455145                        | 0.624297801                        | 9.68E-05                           |
| 0.055711331                          | 10.2211554                           | 15.77071064                        | 0.035960196                        | 0.003779443                        |
| 0.019445803                          | 2.935349903                          | 4.386868902                        | 0.147752465                        | 0.001204568                        |
| 0.003918726                          | 0.439360554                          | 1.125586321                        | 0.556885891                        | 7.66E-05                           |
| 0.002591864                          | 0.537265101                          | 1.312399063                        | 0.790123282                        | 4.73E-05                           |
| 0.002453608                          | 0.205872773                          | 0.537518326                        | 1.132014706                        | 3.91E-05                           |
| 0.008464355                          | 1.197075878                          | 2.532210994                        | 0.218872669                        | 0.000178308                        |
| 0.007341521                          | 0.835034739                          | 1.787646871                        | 0.388824294                        | 0.000195177                        |
| 0.006073257                          | 0.409618801                          | 1.170860735                        | 0.56450522                         | 9.81E-05                           |
| 0.007790959                          | 0.95060866                           | 2.203628069                        | 0.339619062                        | 0.00021951                         |
| 0.004036221                          | 0.601849452                          | 1.214165126                        | 0.523177036                        | 0.000122531                        |
| 0.007471453                          | 1.11949234                           | 2.243572048                        | 0.302388551                        | 0.000229034                        |
| 0.003866637                          | 0.509341947                          | 1.020273969                        | 0.584750113                        | 9.24E-05                           |
| 0.003287123                          | 0.215004525                          | 0.67309935                         | 1.588163357                        | 5.02E-05                           |
| 0.001948048                          | 0.339963153                          | 0.741671613                        | 0.826306589                        | 3.13E-05                           |
| 0.01169624                           | 1.253453225                          | 2.401456501                        | 0.348898799                        | 0.000435189                        |
| 0.035309685                          | 7.633630234                          | 13.98054946                        | 0.044183309                        | 0.002916033                        |
| 0.013924413                          | 2.271020485                          | 5.062966672                        | 0.141294585                        | 0.00043713                         |
| 0.002567771                          | 0.250647305                          | 0.769881032                        | 0.865032216                        | 3.06E-05                           |
| 0.006174605                          | 0.808769228                          | 1.341254433                        | 0.579557283                        | 0.000422658                        |
| 0.00225873                           | 0.352074576                          | 0.948029277                        | 0.645760869                        | 2.88E-05                           |
| 0.013435471                          | 0.697377832                          | 1.878571369                        | 0.338093829                        | 0.000305262                        |
| 0.001674647                          | 0.090908057                          | 0.428260647                        | 1.597677301                        | 1.19E-05                           |
| 0.008232117                          | 1.570448033                          | 2.54155504                         | 0.280503213                        | 0.000321231                        |
| 0.003364714                          | 1.031617639                          | 1.714926196                        | 0.405825637                        | 9.72E-05                           |
| 0.005883688                          | 1.003999482                          | 2.12012452                         | 0.242100148                        | 0.000147258                        |
| 0.010794651                          | 0.857939492                          | 2.191311248                        | 0.272730211                        | 0.000209314                        |
| 0.009108755                          | 0.627941651                          | 2.27181767                         | 0.232699461                        | 0.000110518                        |
| 0.003481491                          | 0.528636865                          | 1.177558607                        | 0.753533779                        | 8.38E-05                           |
| 0.001573709                          | 0.319434026                          | 0.887662749                        | 1.024397271                        | 2.08E-05                           |
| 0.003117624                          | 0.19442514                           | 0.825654326                        | 0.727806078                        | 2.01E-05                           |
| 0.003468264                          | 0.282429199                          | 1.202046766                        | 0.340075152                        | 2.26E-05                           |
| 0.033721651                          | 2.403367537                          | 5.509782696                        | 0.117590727                        | 0.001177029                        |
| 0.005950935                          | 0.925243465                          | 2.545019205                        | 0.274181287                        | 8.26E-05                           |
| 0.016005824                          | 2.980568392                          | 4.754699539                        | 0.125391162                        | 0.000624918                        |
| 0.002507363                          | 0.397441799                          | 0.929106178                        | 0.743358683                        | 5.25E-05                           |
| 0.014311861                          | 1.303841289                          | 2.621472444                        | 0.259578871                        | 0.0006359                          |
| 0.004010889                          | 0.547006293                          | 1.218947495                        | 0.642396237                        | 9.08E-05                           |
| 0.002664939                          | 0.293941393                          | 0.694272248                        | 1.104652298                        | 5.98E-05                           |
| 0.006385261                          | 0.767462381                          | 1.741345729                        | 0.480638524                        | 0.000181352                        |
| 0.001749876                          | 0.147265496                          | 0.483036267                        | 1.327005755                        | 1.93E-05                           |
| 0.00139666                           | 0.095831801                          | 0.342108154                        | 1.668264071                        | 1.23E-05                           |
| 0.00102979                           | 0.15317463                           | 0.601145485                        | 0.916332519                        | 5.66E-06                           |
| 0.006158402                          | 1.245428367                          | 2.042296256                        | 0.323386058                        | 0.00024338                         |
| 0.006394242                          | 0.866630504                          | 1.725220424                        | 0.380313034                        | 0.000169314                        |
| 0.010921283                          | 1.202577419                          | 2.296614104                        | 0.459176633                        | 0.000492029                        |
| 0.004139981                          | 0.615800702                          | 1.175855657                        | 0.571837745                        | 0.00011758                         |
| 0.002603147                          | 0.425902555                          | 0.96404747                         | 0.856907339                        | 4.95E-05                           |
| 0.013023206                          | 2.729442226                          | 4.058025954                        | 0.200158003                        | 0.000701095                        |
| 0.005189568                          | 1.45465743                           | 2.118944249                        | 0.308115598                        | 0.000213674                        |
| 0.003195149                          | 0.559862656                          | 1.268241356                        | 0.381978781                        | 5.22E-05                           |
| 0.048564505                          | 5.879550632                          | 13.83675196                        | 0.037435676                        | 0.001766002                        |
| 0.002367366                          | 0.207258925                          | 0.560720122                        | 1.386752881                        | 4.04E-05                           |
| 0.001630457                          | 0.236635133                          | 1.099576063                        | 0.672865864                        | 7.75E-06                           |
| 0.009103714                          | 1.028291195                          | 2.249773037                        | 0.407727214                        | 0.000307519                        |
| 0.004104317                          | 0.823031722                          | 1.495450168                        | 0.406640695                        | 0.000174232                        |
| 0.035658487                          | 2.014668474                          | 4.661146356                        | 0.127105658                        | 0.001093952                        |
| 0.032845434                          | 6.5653219                            | 8.459765021                        | 0.083068063                        | 0.004703684                        |
| 0.002333614                          | 0.416190804                          | 1.221423103                        | 0.403212885                        | 2.21E-05                           |
| 0.009877466                          | 2.534020781                          | 4.021944038                        | 0.217249106                        | 0.000357701                        |
| 0.008389844                          | 0.838264355                          | 2.071093394                        | 0.22520769                         | 0.000126641                        |
| 0.002105061                          | 0.197098515                          | 0.600857759                        | 1.273936687                        | 2.63E-05                           |
| 0.00148394                           | 0.12140868                           | 0.391198012                        | 1.851102121                        | 1.63E-05                           |
| 0.024405851                          | 8.907898133                          | 11.40338611                        | 0.071955678                        | 0.001971025                        |
| 0.007014888                          | 0.736679761                          | 1.98565009                         | 0.24384581                         | 0.000115889                        |
| 0.051237929                          | 8.222626644                          | 14.31628309                        | 0.040333436                        | 0.002576926                        |
| 0.021855622                          | 1.086524228                          | 3.677026299                        | 0.179521677                        | 0.000407014                        |
| 0.010222861                          | 1.843364897                          | 4.287375178                        | 0.19236756                         | 0.00021182                         |

| log.sigma.2.0.mm.3D_gldm_GrayLevelVariance | log.sigma.2.0.mm.3D_gldm_HighGrayLevelEmphasis | log.sigma.2.0.mm.3D_gldm_GrayLevelNonUniformityNormalized | log.sigma.2.0.mm.3D_gldm_DependenceEntropy |
|--------------------------------------------|------------------------------------------------|-----------------------------------------------------------|--------------------------------------------|
| 31.15519144                                | 263.9985836                                    | 0.050995514                                               | 6.449655971                                |
| 20.21897393                                | 286.4256139                                    | 0.074968086                                               | 6.879417426                                |
| 31.17609739                                | 203.8502304                                    | 0.058941579                                               | 6.207034477                                |
| 38.68971033                                | 485.1096774                                    | 0.044974634                                               | 6.840314027                                |
| 27.56626656                                | 341.1225627                                    | 0.060435596                                               | 6.170988107                                |
| 19.41748559                                | 154.9968896                                    | 0.064939086                                               | 6.205311165                                |
| 14.85794539                                | 349.8456973                                    | 0.096020921                                               | 5.806514811                                |
| 38.56073183                                | 271.6257485                                    | 0.047434074                                               | 6.497358226                                |
| 33.76061631                                | 320.3290043                                    | 0.047460334                                               | 6.72649368                                 |
| 22.16427183                                | 346.8386056                                    | 0.067733989                                               | 6.669266655                                |
| 20.71165867                                | 186.8004837                                    | 0.063741997                                               | 6.233592616                                |
| 28.70143021                                | 398.9392713                                    | 0.056846804                                               | 6.673003627                                |
| 19.43656387                                | 183.0766635                                    | 0.064297464                                               | 6.438551155                                |
| 20.9473512                                 | 157.2602862                                    | 0.062298188                                               | 6.460379061                                |
| 23.2668989                                 | 310.3666301                                    | 0.059467106                                               | 6.288748503                                |
| 11.32066754                                | 254.6034259                                    | 0.148961966                                               | 6.592927269                                |
| 26.3714522                                 | 197.2765043                                    | 0.057056182                                               | 6.414802334                                |
| 22.61650053                                | 177.9245283                                    | 0.060601402                                               | 6.718854554                                |
| 33.70027515                                | 321.766323                                     | 0.049916746                                               | 6.451403976                                |
| 13.402483                                  | 222.3241699                                    | 0.084129055                                               | 6.757379339                                |
| 16.97860505                                | 270.4123277                                    | 0.083568681                                               | 6.619851771                                |
| 26.46911303                                | 218.9686047                                    | 0.055571255                                               | 6.478934369                                |
| 19.02134021                                | 192.7667521                                    | 0.070146377                                               | 6.514547081                                |
| 31.39675226                                | 428.1600832                                    | 0.056496125                                               | 6.276117168                                |
| 19.56227511                                | 201.7001661                                    | 0.074423847                                               | 6.43772027                                 |
| 31.06361651                                | 381.9510086                                    | 0.054161234                                               | 6.566358506                                |
| 14.79808312                                | 352.4307559                                    | 0.090602117                                               | 6.772705663                                |
| 24.81377694                                | 239.4270761                                    | 0.067051248                                               | 6.476285035                                |
| 35.48368288                                | 324.0407932                                    | 0.04893226                                                | 6.58557797                                 |
| 19.37287914                                | 206.6707317                                    | 0.080060801                                               | 6.841860032                                |
| 19.13844521                                | 268.3293489                                    | 0.074163265                                               | 6.481436045                                |
| 15.43171458                                | 153.2664418                                    | 0.078464662                                               | 6.680908491                                |
| 33.12422791                                | 381.5809149                                    | 0.049213312                                               | 6.789264517                                |
| 37.24029216                                | 397.875                                        | 0.07137574                                                | 5.415355675                                |
| 41.25695856                                | 316.996988                                     | 0.045162578                                               | 6.149407665                                |
| 22.94030267                                | 256.2886139                                    | 0.05831095                                                | 6.502551528                                |
| 30.46811523                                | 232.196875                                     | 0.055624035                                               | 6.82702489                                 |
| 21.9439021                                 | 367.6222421                                    | 0.06087659                                                | 6.718534871                                |
| 21.87747714                                | 246.302994                                     | 0.063275126                                               | 6.401982386                                |
| 28.67457227                                | 288.8093422                                    | 0.052763493                                               | 6.578269329                                |
| 21.80789773                                | 320.3894166                                    | 0.063267602                                               | 6.76384426                                 |
| 27.735693                                  | 255.2927597                                    | 0.055611649                                               | 6.483966858                                |
| 27.9306244                                 | 255.0182704                                    | 0.055988434                                               | 6.560032188                                |
| 33.7017718                                 | 272.035122                                     | 0.049872219                                               | 6.650331208                                |
| 26.41182642                                | 256.6496273                                    | 0.054357898                                               | 6.507993566                                |
| 15.4419005                                 | 118.8182226                                    | 0.075978085                                               | 6.474639492                                |
| 31.90711739                                | 597.2006564                                    | 0.050633461                                               | 6.834976429                                |
| 26.59932507                                | 192.8456261                                    | 0.055150358                                               | 6.143163135                                |
| 29.25289597                                | 341.2761194                                    | 0.087770105                                               | 5.411129352                                |
| 31.22666785                                | 312.750503                                     | 0.05992899                                                | 6.235275442                                |
| 20.81224343                                | 257.526285                                     | 0.064094026                                               | 6.719719003                                |
| 29.31864565                                | 214.2720677                                    | 0.057858345                                               | 6.276048568                                |
| 25.21417755                                | 525.0601937                                    | 0.05711073                                                | 6.881068228                                |
| 17.77864241                                | 178.9526227                                    | 0.065657737                                               | 6.230106815                                |
| 15.87870813                                | 258.3699218                                    | 0.096209126                                               | 6.745776044                                |
| 42.51394891                                | 367.8668942                                    | 0.042639466                                               | 6.518133302                                |
| 43.79961778                                | 538.8367533                                    | 0.042719144                                               | 6.811633036                                |
| 34.12907027                                | 421.6372776                                    | 0.056865782                                               | 6.478591504                                |
| 24.30340207                                | 280.5                                          | 0.061892918                                               | 6.60617776                                 |
| 16.32565924                                | 557.5085131                                    | 0.072849576                                               | 6.221554293                                |
| 27.86874324                                | 253.5630014                                    | 0.05520537                                                | 6.523649133                                |
| 29.88181889                                | 458.4428624                                    | 0.05385357                                                | 6.954139112                                |
| 13.83453294                                | 297.838835                                     | 0.086052723                                               | 6.628223609                                |
| 14.88104183                                | 1260.627243                                    | 0.097227125                                               | 6.846776411                                |
| 22.20268003                                | 166.4239631                                    | 0.061861581                                               | 5.959528897                                |
| 30.45064597                                | 266.992273                                     | 0.055239449                                               | 6.609413978                                |
| 34.29480275                                | 255.6548223                                    | 0.053299492                                               | 6.214208983                                |
| 29.14684992                                | 447.8145136                                    | 0.05214822                                                | 6.769469784                                |
| 25.90004323                                | 235.7600897                                    | 0.056858171                                               | 6.062990771                                |
| 30.85745802                                | 301.968175                                     | 0.051774168                                               | 6.696246777                                |
| 26.0664386                                 | 398.6707237                                    | 0.057590244                                               | 6.706589796                                |
| 25.16677245                                | 218.3250664                                    | 0.057381647                                               | 6.513543939                                |
| 19.04691136                                | 285.4224071                                    | 0.07069418                                                | 6.844251049                                |
| 15.90204923                                | 272.8463371                                    | 0.082229471                                               | 6.745746945                                |
| 20.22516623                                | 498.9242919                                    | 0.077493034                                               | 6.847169925                                |
| 40.31179183                                | 361.8969534                                    | 0.044521846                                               | 6.558454879                                |
| 26.61961274                                | 217.5640107                                    | 0.054721168                                               | 6.584831213                                |
| 28.52438861                                | 209.0081967                                    | 0.05628057                                                | 6.264507478                                |
| 28.55492664                                | 237.803288                                     | 0.05279886                                                | 6.595559221                                |
| 27.17563579                                | 283.4005622                                    | 0.05631111                                                | 6.691146536                                |
| 42.62609836                                | 329.8075397                                    | 0.045784518                                               | 6.25382952                                 |
| 52.01390328                                | 559.2207308                                    | 0.039488267                                               | 6.661909725                                |
| 36.77869435                                | 1203.715616                                    | 0.050092723                                               | 6.802543929                                |
| 29.26487515                                | 294.3931034                                    | 0.066159334                                               | 5.512278315                                |
| 20.17968583                                | 205.2391625                                    | 0.064068408                                               | 6.540750884                                |
| 15.57714158                                | 521.3670562                                    | 0.084479669                                               | 6.790989001                                |
| 26.95035058                                | 193.9511568                                    | 0.056353712                                               | 6.279766139                                |
| 35.26277326                                | 399.7725515                                    | 0.052236389                                               | 6.462036748                                |
| 16.55546597                                | 211.3333333                                    | 0.07044104                                                | 5.776529828                                |
| 34.56235828                                | 293.6190476                                    | 0.084263039                                               | 5.066313913                                |
| 26.40980062                                | 835.429434                                     | 0.061108026                                               | 6.939117724                                |
| 45.40634304                                | 422.184136                                     | 0.045157252                                               | 6.481443169                                |
| 24.58401278                                | 393.0587084                                    | 0.066063243                                               | 6.759226181                                |
| 20.45864169                                | 317.5447433                                    | 0.064050071                                               | 6.84370594                                 |
| 17.45282103                                | 286.1846366                                    | 0.07064348                                                | 6.702850983                                |
| 69.69719883                                | 629.1225296                                    | 0.0403537                                                 | 6.160282953                                |
| 34.45958965                                | 383.8675987                                    | 0.06169792                                                | 6.476159026                                |
| 34.64934893                                | 289.6097561                                    | 0.055456408                                               | 5.46936316                                 |
| 18.07635703                                | 192.121372                                     | 0.069624968                                               | 6.056349517                                |
| 33.95893122                                | 352.5836431                                    | 0.060261129                                               | 6.670270787                                |

| log.sigma.2.0.mm.3D_gldm_DependenceNonUniformity | log.sigma.2.0.mm.3D_gldm_GrayLevelNonUniformity | log.sigma.2.0.mm.3D_gldm_SmallDependenceEmphasis |
|--------------------------------------------------|-------------------------------------------------|--------------------------------------------------|
| 166.9716714                                      | 36.00283286                                     | 0.39298465                                       |
| 276.403948                                       | 155.7087145                                     | 0.256473154                                      |
| 102.2073733                                      | 25.58064516                                     | 0.436409073                                      |
| 619.5874763                                      | 118.5081594                                     | 0.403383866                                      |
| 85.8189415                                       | 21.69637883                                     | 0.366637264                                      |
| 137.251944                                       | 41.75583204                                     | 0.369182049                                      |
| 68.66765579                                      | 32.35905045                                     | 0.316935219                                      |
| 248.2694611                                      | 47.52894212                                     | 0.40814983                                       |
| 486.5921116                                      | 98.67003367                                     | 0.379293773                                      |
| 544.8231117                                      | 209.8398967                                     | 0.323731348                                      |
| 185.3700121                                      | 52.7146312                                      | 0.343123041                                      |
| 291.1133603                                      | 84.24696356                                     | 0.351776019                                      |
| 441.7782064                                      | 133.3529412                                     | 0.315419678                                      |
| 219.2576029                                      | 69.64937388                                     | 0.32695593                                       |
| 226.4621295                                      | 54.17453348                                     | 0.413237612                                      |
| 632.4340003                                      | 1034.838779                                     | 0.179788082                                      |
| 151.9283668                                      | 39.8252149                                      | 0.373264633                                      |
| 428.0883362                                      | 141.32247                                       | 0.284383179                                      |
| 139.8900344                                      | 29.05154639                                     | 0.383233776                                      |
| 359.2513388                                      | 235.6454838                                     | 0.214846098                                      |
| 768.7787136                                      | 436.5627871                                     | 0.295295902                                      |
| 408.4604651                                      | 95.58255814                                     | 0.38277326                                       |
| 503.0314903                                      | 191.5697547                                     | 0.316706643                                      |
| 125.045738                                       | 27.17463617                                     | 0.441678794                                      |
| 217.2774086                                      | 89.60631229                                     | 0.330673706                                      |
| 141.7463977                                      | 37.58789625                                     | 0.365226247                                      |
| 443.1534911                                      | 314.0271206                                     | 0.240015422                                      |
| 278.3984648                                      | 96.08443824                                     | 0.362997593                                      |
| 427.9042493                                      | 86.36543909                                     | 0.392858682                                      |
| 338.5074744                                      | 203.5145555                                     | 0.272314275                                      |
| 567.9298522                                      | 235.7650204                                     | 0.324130815                                      |
| 950.8037099                                      | 465.2954469                                     | 0.263868865                                      |
| 435.6797836                                      | 100.050664                                      | 0.376966294                                      |
| 33.25                                            | 7.423076923                                     | 0.564855769                                      |
| 95.71084337                                      | 14.9939759                                      | 0.473355872                                      |
| 425.8415842                                      | 117.7881188                                     | 0.307535683                                      |
| 546.4652778                                      | 160.1972222                                     | 0.334164141                                      |
| 627.4818128                                      | 204.1800835                                     | 0.324253673                                      |
| 173.6299401                                      | 52.83473054                                     | 0.333763942                                      |
| 221.3012393                                      | 55.34890372                                     | 0.371979796                                      |
| 246.2550882                                      | 93.25644505                                     | 0.304334878                                      |
| 209.7072403                                      | 52.99790136                                     | 0.357249249                                      |
| 352.6199756                                      | 91.93300853                                     | 0.337491994                                      |
| 227.3160976                                      | 51.11902439                                     | 0.354426899                                      |
| 448.7912673                                      | 102.0841321                                     | 0.394350352                                      |
| 370.6588869                                      | 169.2791741                                     | 0.294537636                                      |
| 929.9915612                                      | 216.0023441                                     | 0.380153446                                      |
| 151.2538593                                      | 32.15265866                                     | 0.392771584                                      |
| 32.02985075                                      | 11.76119403                                     | 0.406069588                                      |
| 124.110664                                       | 29.78470825                                     | 0.418906392                                      |
| 614.9199766                                      | 219.4579439                                     | 0.31670729                                       |
| 190.8645707                                      | 47.84885127                                     | 0.347579197                                      |
| 699.1015441                                      | 218.2200995                                     | 0.313180101                                      |
| 124.2893401                                      | 38.8037225                                      | 0.332609882                                      |
| 811.41392                                        | 627.5721294                                     | 0.230463489                                      |
| 242.3447099                                      | 37.48009101                                     | 0.452014748                                      |
| 535.2909257                                      | 93.68308254                                     | 0.412673156                                      |
| 307.3480278                                      | 73.52745553                                     | 0.396033128                                      |
| 149.1474201                                      | 50.38083538                                     | 0.346045304                                      |
| 168.7139614                                      | 64.18047673                                     | 0.325332758                                      |
| 457.7947145                                      | 116.9801793                                     | 0.348592031                                      |
| 1020.112815                                      | 295.0098576                                     | 0.331153918                                      |
| 446.2330097                                      | 265.9029126                                     | 0.255648427                                      |
| 296.5496155                                      | 265.5272794                                     | 0.213077904                                      |
| 45.57142857                                      | 13.42396313                                     | 0.366343368                                      |
| 342.9381842                                      | 85.78686413                                     | 0.376058734                                      |
| 105.5837563                                      | 21                                              | 0.45081269                                       |
| 650.2599312                                      | 166.7178605                                     | 0.327659785                                      |
| 115.5336323                                      | 25.35874439                                     | 0.39847011                                       |
| 433.0696171                                      | 104.1178518                                     | 0.371927471                                      |
| 595.5078947                                      | 175.0743421                                     | 0.343352819                                      |
| 232.3764393                                      | 64.78387954                                     | 0.325654196                                      |
| 775.3989938                                      | 365.3475232                                     | 0.270626949                                      |
| 943.9937463                                      | 552.2531269                                     | 0.252695199                                      |
| 1363.390196                                      | 711.3860566                                     | 0.285279123                                      |
| 291.5806452                                      | 49.68637993                                     | 0.425481849                                      |
| 233.1951656                                      | 61.12354521                                     | 0.364796069                                      |
| 141.9967213                                      | 34.33114754                                     | 0.391450558                                      |
| 384.1043084                                      | 93.13718821                                     | 0.366848316                                      |
| 570.4223472                                      | 160.2614195                                     | 0.343023686                                      |
| 140.8174603                                      | 23.07539683                                     | 0.477232694                                      |
| 384.7032066                                      | 52.95376585                                     | 0.481984715                                      |
| 620.8273639                                      | 139.8588825                                     | 0.398036227                                      |
| 37.34482759                                      | 9.593103448                                     | 0.382819923                                      |
| 659.0171041                                      | 217.2559717                                     | 0.313275621                                      |
| 741.4010226                                      | 462.6106647                                     | 0.240454259                                      |
| 173.2750643                                      | 43.84318766                                     | 0.391304048                                      |
| 382.8402062                                      | 81.07087629                                     | 0.381290009                                      |
| 38.08196721                                      | 12.89071038                                     | 0.345134575                                      |
| 30.94285714                                      | 8.847619048                                     | 0.461079365                                      |
| 675.7677987                                      | 242.9044025                                     | 0.307364552                                      |
| 190.1246459                                      | 31.88101983                                     | 0.456186815                                      |
| 172.8747554                                      | 67.51663405                                     | 0.329985796                                      |
| 685.3897311                                      | 261.9647922                                     | 0.302776452                                      |
| 921.748536                                       | 410.1560455                                     | 0.272999789                                      |
| 75.93280632                                      | 10.20948617                                     | 0.497044049                                      |
| 247.3486842                                      | 75.02467105                                     | 0.319166522                                      |
| 39.42276423                                      | 6.821138211                                     | 0.478504968                                      |
| 86.79419525                                      | 26.3878628                                      | 0.321997903                                      |
| 149.3320942                                      | 48.6307311                                      | 0.357618989                                      |

| log.sigma.2.0.mm.3D_gldm_DependenceNonUniformityNormalized | log.sigma.2.0.mm.3D_gldm_DependenceVariance | log.sigma.2.0.mm.3D_gldm_LargeDependenceEmphasis |
|------------------------------------------------------------|---------------------------------------------|--------------------------------------------------|
| 0.236503784                                                | 2.019813978                                 | 8.135977337                                      |
| 0.133078454                                                | 10.94881024                                 | 28.77371208                                      |
| 0.23550086                                                 | 2.400157149                                 | 8.433179724                                      |
| 0.235137562                                                | 2.630990066                                 | 8.910436433                                      |
| 0.239049976                                                | 1.401090929                                 | 7.423398329                                      |
| 0.213455589                                                | 2.30881197                                  | 9.32348367                                       |
| 0.20376159                                                 | 2.605270805                                 | 10.70326409                                      |
| 0.247773913                                                | 1.727451285                                 | 7.369261477                                      |
| 0.23405104                                                 | 1.847721124                                 | 8.034151034                                      |
| 0.175862851                                                | 3.632590801                                 | 13.17107811                                      |
| 0.224147536                                                | 1.903481209                                 | 8.731559855                                      |
| 0.196432767                                                | 2.608658832                                 | 10.48043185                                      |
| 0.213007814                                                | 2.165564564                                 | 9.787849566                                      |
| 0.196115924                                                | 2.568821784                                 | 10.71019678                                      |
| 0.248586311                                                | 1.704147744                                 | 7.248079034                                      |
| 0.091036994                                                | 14.16788865                                 | 44.50424644                                      |
| 0.217662417                                                | 2.297362091                                 | 9.126074499                                      |
| 0.183571328                                                | 3.423437505                                 | 13.09948542                                      |
| 0.240360884                                                | 1.686246029                                 | 7.639175258                                      |
| 0.128258243                                                | 8.987781306                                 | 27.26561942                                      |
| 0.147162847                                                | 9.299407376                                 | 23.81049005                                      |
| 0.237477015                                                | 1.965932937                                 | 8.123255814                                      |
| 0.184193149                                                | 3.424462023                                 | 12.57890882                                      |
| 0.259970349                                                | 1.4938905                                   | 6.563409563                                      |
| 0.180462964                                                | 3.927026192                                 | 13.35049834                                      |
| 0.20424553                                                 | 3.817364151                                 | 11.80979827                                      |
| 0.127857326                                                | 10.95173025                                 | 29.47201385                                      |
| 0.194276668                                                | 3.075917134                                 | 11.12281926                                      |
| 0.242438668                                                | 1.746122351                                 | 7.601699717                                      |
| 0.133165804                                                | 11.06088059                                 | 28.54130606                                      |
| 0.178650473                                                | 3.777345649                                 | 13.23214847                                      |
| 0.160337894                                                | 6.036962539                                 | 18.59460371                                      |
| 0.214303878                                                | 2.625399066                                 | 9.657156911                                      |
| 0.319711538                                                | 1.557692308                                 | 5.557692308                                      |
| 0.288285673                                                | 1.314813471                                 | 5.734939759                                      |
| 0.210812665                                                | 1.955522988                                 | 9.646534653                                      |
| 0.189744888                                                | 4.495756173                                 | 13.66319444                                      |
| 0.187084619                                                | 4.434958712                                 | 13.81454979                                      |
| 0.207940048                                                | 2.100291871                                 | 9.536526946                                      |
| 0.210964003                                                | 2.416762617                                 | 9.4957102                                        |
| 0.167065867                                                | 4.708089011                                 | 15.53459973                                      |
| 0.22004957                                                 | 1.883399085                                 | 8.639034627                                      |
| 0.21475029                                                 | 2.029707392                                 | 9.21680877                                       |
| 0.221771802                                                | 2.063862939                                 | 8.884878049                                      |
| 0.238972986                                                | 1.906319573                                 | 7.890308839                                      |
| 0.166363953                                                | 4.391764357                                 | 15.24506284                                      |
| 0.218000835                                                | 3.023597217                                 | 10.13220816                                      |
| 0.259440582                                                | 1.26038795                                  | 6.598627787                                      |
| 0.239028737                                                | 2.220093562                                 | 8.432835821                                      |
| 0.249719646                                                | 1.773400969                                 | 7.30583501                                       |
| 0.179591115                                                | 4.990967756                                 | 15.03971963                                      |
| 0.2307915                                                  | 1.809857456                                 | 8.412333736                                      |
| 0.182962979                                                | 5.262125223                                 | 15.41821513                                      |
| 0.210303452                                                | 2.190665968                                 | 9.639593909                                      |
| 0.124392752                                                | 8.559834493                                 | 26.68787368                                      |
| 0.275705017                                                | 1.307259128                                 | 5.994311718                                      |
| 0.244090709                                                | 1.984252011                                 | 7.756953944                                      |
| 0.237701491                                                | 1.725049332                                 | 7.618716164                                      |
| 0.183227789                                                | 7.19872743                                  | 17.68550369                                      |
| 0.191502794                                                | 2.693229884                                 | 11.15664018                                      |
| 0.21604281                                                 | 1.929467563                                 | 8.896177442                                      |
| 0.186219937                                                | 4.605170458                                 | 13.99707923                                      |
| 0.144411977                                                | 6.502855647                                 | 20.6394822                                       |
| 0.108586458                                                | 15.3672213                                  | 40.43317466                                      |
| 0.210006583                                                | 2.38442099                                  | 9.552995392                                      |
| 0.220823042                                                | 2.209237133                                 | 8.893110109                                      |
| 0.267979077                                                | 1.607719859                                 | 6.573604061                                      |
| 0.203396913                                                | 2.817857569                                 | 10.81169847                                      |
| 0.259044019                                                | 1.581954192                                 | 7.040358744                                      |
| 0.215350381                                                | 2.464835251                                 | 9.439582297                                      |
| 0.195890755                                                | 3.01736669                                  | 11.14736842                                      |
| 0.205825013                                                | 2.164038345                                 | 9.8255093                                        |
| 0.150038505                                                | 7.153467486                                 | 20.84404025                                      |
| 0.140558926                                                | 7.051473622                                 | 21.88475283                                      |
| 0.148517451                                                | 5.940689051                                 | 18.95250545                                      |
| 0.26127298                                                 | 1.512631518                                 | 6.684587814                                      |
| 0.208769172                                                | 2.421066468                                 | 9.639212175                                      |
| 0.23278151                                                 | 2.102456329                                 | 8.344262295                                      |
| 0.217746207                                                | 2.313792864                                 | 9.22675737                                       |
| 0.200429497                                                | 2.987058806                                 | 10.9360506                                       |
| 0.279399723                                                | 1.348954397                                 | 5.873015873                                      |
| 0.286877857                                                | 1.378824555                                 | 5.797912006                                      |
| 0.222359371                                                | 2.455729017                                 | 9.032234957                                      |
| 0.257550535                                                | 1.290083234                                 | 6.820689655                                      |
| 0.194342997                                                | 2.628224607                                 | 11.04010616                                      |
| 0.135390983                                                | 7.38243486                                  | 23.17275383                                      |
| 0.222718592                                                | 1.930637519                                 | 8.303341902                                      |
| 0.246675391                                                | 1.624641301                                 | 7.469072165                                      |
| 0.208098181                                                | 2.472334199                                 | 10.0273224                                       |
| 0.294693878                                                | 1.014603175                                 | 5.285714286                                      |
| 0.170004478                                                | 6.566466453                                 | 18.01383648                                      |
| 0.269298365                                                | 1.582116862                                 | 6.464589235                                      |
| 0.169153381                                                | 11.35441424                                 | 24.77495108                                      |
| 0.167576951                                                | 5.973061137                                 | 17.20293399                                      |
| 0.158757929                                                | 4.855576607                                 | 16.74061316                                      |
| 0.300129669                                                | 1.592526051                                 | 5.964426877                                      |
| 0.203411747                                                | 2.372316482                                 | 10.30098684                                      |
| 0.320510278                                                | 0.869323815                                 | 4.772357724                                      |
| 0.229008431                                                | 1.740770393                                 | 8.688654354                                      |
| 0.185045966                                                | 4.309488383                                 | 13.41387856                                      |



| log.sigma.2.0.mm.3D_gldm_LargeDependenceLowGrayLevelEmphasis | log.sigma.2.0.mm.3D_gldm_SmallDependenceHighGrayLevelEmphasis | log.sigma.2.0.mm.3D_gldm_LargeDependenceHighGrayLevelEmphasis |
|--------------------------------------------------------------|---------------------------------------------------------------|---------------------------------------------------------------|
| 0.060437302                                                  | 118.0326864                                                   | 1755.191218                                                   |
| 0.120228658                                                  | 85.44403817                                                   | 7581.497352                                                   |
| 0.087127003                                                  | 110.0522055                                                   | 1218.052995                                                   |
| 0.026410656                                                  | 208.6589822                                                   | 3962.916129                                                   |
| 0.034176365                                                  | 126.3138796                                                   | 2507.779944                                                   |
| 0.125283495                                                  | 62.54202095                                                   | 1217.454121                                                   |
| 0.034890007                                                  | 100.6418755                                                   | 3992.605341                                                   |
| 0.063864633                                                  | 116.7493982                                                   | 1866.312375                                                   |
| 0.045841054                                                  | 126.7048337                                                   | 2399.92304                                                    |
| 0.050306933                                                  | 130.3873222                                                   | 3947.457069                                                   |
| 0.08853352                                                   | 67.62182638                                                   | 1569.475212                                                   |
| 0.036808636                                                  | 159.9477245                                                   | 3644.511471                                                   |
| 0.088777882                                                  | 61.05781348                                                   | 1607.720829                                                   |
| 0.149883448                                                  | 58.71128798                                                   | 1455.276386                                                   |
| 0.032938283                                                  | 133.7719769                                                   | 2123.767289                                                   |
| 0.198720484                                                  | 55.497292                                                     | 10379.79646                                                   |
| 0.109362774                                                  | 79.13550103                                                   | 1651.540115                                                   |
| 0.143830824                                                  | 61.6983269                                                    | 1868.698113                                                   |
| 0.047925118                                                  | 128.8192883                                                   | 2261.694158                                                   |
| 0.15346601                                                   | 57.06991533                                                   | 5429.260264                                                   |
| 0.10546496                                                   | 94.87169594                                                   | 5769.788285                                                   |
| 0.068839754                                                  | 97.15242382                                                   | 1489.055814                                                   |
| 0.10678663                                                   | 71.56865128                                                   | 1967.096302                                                   |
| 0.021951087                                                  | 188.132202                                                    | 2816.621622                                                   |
| 0.102431411                                                  | 80.36237023                                                   | 2231.756645                                                   |
| 0.043511895                                                  | 160.5793798                                                   | 4002.365994                                                   |
| 0.094809338                                                  | 96.82038316                                                   | 9663.466532                                                   |
| 0.078180025                                                  | 104.7631241                                                   | 2143.43545                                                    |
| 0.044526426                                                  | 128.2939219                                                   | 2377.623796                                                   |
| 0.168216205                                                  | 68.16450944                                                   | 5539.289142                                                   |
| 0.068863569                                                  | 106.966114                                                    | 2940.568418                                                   |
| 0.18665647                                                   | 49.06994893                                                   | 2367.36425                                                    |
| 0.040186615                                                  | 155.2657463                                                   | 3419.530743                                                   |
| 0.027990929                                                  | 208.2975775                                                   | 2460.759615                                                   |
| 0.046327152                                                  | 160.616507                                                    | 1597.171687                                                   |
| 0.058253468                                                  | 82.13471277                                                   | 2390.538119                                                   |
| 0.098203044                                                  | 94.21304907                                                   | 2695.879514                                                   |
| 0.047996838                                                  | 129.486139                                                    | 4562.842278                                                   |
| 0.064941483                                                  | 83.36377242                                                   | 2377.34012                                                    |
| 0.054476616                                                  | 120.5437607                                                   | 2457.907531                                                   |
| 0.060094851                                                  | 106.3342731                                                   | 4695.404342                                                   |
| 0.061610114                                                  | 94.89099073                                                   | 2088.010493                                                   |
| 0.066813409                                                  | 89.09144502                                                   | 2294.107186                                                   |
| 0.072008561                                                  | 104.6047442                                                   | 2224.138537                                                   |
| 0.051516753                                                  | 102.4362598                                                   | 1996.218317                                                   |
| 0.234069306                                                  | 44.23051704                                                   | 1387.117145                                                   |
| 0.021078335                                                  | 241.7288291                                                   | 5633.694796                                                   |
| 0.085196446                                                  | 80.97003383                                                   | 1127.164666                                                   |
| 0.093121153                                                  | 138.6210778                                                   | 3007.783582                                                   |
| 0.044127716                                                  | 131.1261169                                                   | 2243.736419                                                   |
| 0.078415693                                                  | 92.73384827                                                   | 3471.745327                                                   |
| 0.0874999                                                    | 75.85129934                                                   | 1827.616687                                                   |
| 0.034654631                                                  | 176.0729601                                                   | 7638.117509                                                   |
| 0.09215661                                                   | 65.03383874                                                   | 1519.588832                                                   |
| 0.124796937                                                  | 68.72619551                                                   | 6280.849456                                                   |
| 0.030011297                                                  | 177.7520065                                                   | 2074.715586                                                   |
| 0.023880522                                                  | 237.0023083                                                   | 3652.026904                                                   |
| 0.028950908                                                  | 163.3013651                                                   | 3294.525135                                                   |
| 0.082906961                                                  | 107.5239663                                                   | 4548.224816                                                   |
| 0.033506548                                                  | 198.4232586                                                   | 5526.818388                                                   |
| 0.063138468                                                  | 100.2802785                                                   | 1940.853233                                                   |
| 0.038078619                                                  | 163.5253425                                                   | 5950.525374                                                   |
| 0.082225772                                                  | 85.71240864                                                   | 5614.689968                                                   |
| 0.03309633                                                   | 270.2562788                                                   | 50474.17173                                                   |
| 0.179641361                                                  | 76.3657119                                                    | 1144.894009                                                   |
| 0.067250503                                                  | 112.8809108                                                   | 2043.113329                                                   |
| 0.076729186                                                  | 116.8665999                                                   | 1702.675127                                                   |
| 0.032669955                                                  | 160.893271                                                    | 4433.52299                                                    |
| 0.062327496                                                  | 100.6126058                                                   | 1480.015695                                                   |
| 0.05143411                                                   | 123.9403714                                                   | 2514.583789                                                   |
| 0.038946029                                                  | 152.0003006                                                   | 3878.688487                                                   |
| 0.084870309                                                  | 77.03858945                                                   | 1918.968113                                                   |
| 0.090465889                                                  | 89.28803093                                                   | 5373.762964                                                   |
| 0.095665561                                                  | 78.09317489                                                   | 5530.346933                                                   |
| 0.042251574                                                  | 151.2055845                                                   | 9037.708824                                                   |
| 0.037623313                                                  | 155.6531753                                                   | 2339.006272                                                   |
| 0.093875335                                                  | 84.32190646                                                   | 1927.38675                                                    |
| 0.092249365                                                  | 95.26736545                                                   | 1268.296721                                                   |
| 0.076333851                                                  | 95.37361498                                                   | 1914.144558                                                   |
| 0.058415275                                                  | 110.4372084                                                   | 2752.565706                                                   |
| 0.037901181                                                  | 173.9154597                                                   | 1804.295635                                                   |
| 0.017215959                                                  | 277.8399016                                                   | 3132.404922                                                   |
| 0.008808994                                                  | 498.0856548                                                   | 10402.87536                                                   |
| 0.042594798                                                  | 96.18712452                                                   | 2200.434483                                                   |
| 0.088333497                                                  | 72.75800559                                                   | 1940.569154                                                   |
| 0.04985874                                                   | 139.9217436                                                   | 11272.82798                                                   |
| 0.097279555                                                  | 90.89520209                                                   | 1258.658098                                                   |
| 0.031218491                                                  | 149.6386155                                                   | 2947.717139                                                   |
| 0.06635273                                                   | 73.45855705                                                   | 2251.639344                                                   |
| 0.111843956                                                  | 121.130291                                                    | 1787.885714                                                   |
| 0.024237548                                                  | 262.835418                                                    | 14566.73711                                                   |
| 0.027219432                                                  | 222.9576414                                                   | 2231.94051                                                    |
| 0.073536495                                                  | 139.9475454                                                   | 9133.32681                                                    |
| 0.065433154                                                  | 106.2509914                                                   | 5168.148166                                                   |
| 0.075858537                                                  | 90.52050759                                                   | 4204.955219                                                   |
| 0.020151748                                                  | 324.8165357                                                   | 3559.557312                                                   |
| 0.035488069                                                  | 117.214952                                                    | 4065.681743                                                   |
| 0.101228452                                                  | 139.5133808                                                   | 1454.195122                                                   |
| 0.066505187                                                  | 59.69649703                                                   | 1705.85752                                                    |
| 0.052590955                                                  | 152.4278839                                                   | 4114.690211                                                   |

| log.sigma.2.0.mm.3D_gldm_SmallDependenceLowGrayLevelEmphasis | log.sigma.2.0.mm.3D_gldm_LowGrayLevelEmphasis | log.sigma.2.0.mm.3D_gldm_DistanceZoneVariabilityNormalized |
|--------------------------------------------------------------|-----------------------------------------------|------------------------------------------------------------|
| 0.005988859                                                  | 0.010046175                                   | 0.918039073                                                |
| 0.0019017                                                    | 0.005489879                                   | 0.906185076                                                |
| 0.008060315                                                  | 0.01346108                                    | 0.911694102                                                |
| 0.00181916                                                   | 0.003640432                                   | 0.868724058                                                |
| 0.004687653                                                  | 0.007434479                                   | 0.891922593                                                |
| 0.00783569                                                   | 0.016035593                                   | 0.873494898                                                |
| 0.004508446                                                  | 0.006673219                                   | 0.63554402                                                 |
| 0.005028359                                                  | 0.01050919                                    | 0.839891712                                                |
| 0.003097264                                                  | 0.006662422                                   | 0.92686068                                                 |
| 0.00161714                                                   | 0.004209728                                   | 0.933644857                                                |
| 0.005424808                                                  | 0.012950136                                   | 0.875889605                                                |
| 0.002117944                                                  | 0.004329141                                   | 0.938628248                                                |
| 0.004532556                                                  | 0.010635005                                   | 0.917328765                                                |
| 0.008044228                                                  | 0.017246514                                   | 0.924893645                                                |
| 0.003854985                                                  | 0.00642697                                    | 0.85650027                                                 |
| 0.001081564                                                  | 0.004970261                                   | 0.903384847                                                |
| 0.007595605                                                  | 0.015188122                                   | 0.760536819                                                |
| 0.003924922                                                  | 0.011856626                                   | 0.950342813                                                |
| 0.0046856                                                    | 0.008505663                                   | 0.82677882                                                 |
| 0.001644436                                                  | 0.006327037                                   | 0.947175529                                                |
| 0.001781728                                                  | 0.005177446                                   | 0.896401463                                                |
| 0.004641495                                                  | 0.009826706                                   | 0.866107996                                                |
| 0.00333022                                                   | 0.009156209                                   | 0.943296936                                                |
| 0.004125021                                                  | 0.005901463                                   | 0.7312                                                     |
| 0.003180031                                                  | 0.009495675                                   | 0.907586899                                                |
| 0.003313568                                                  | 0.005764721                                   | 0.920403252                                                |
| 0.001409731                                                  | 0.004015919                                   | 0.891861566                                                |
| 0.003233442                                                  | 0.008480611                                   | 0.937565036                                                |
| 0.003891342                                                  | 0.00748914                                    | 0.932640274                                                |
| 0.003139814                                                  | 0.008569667                                   | 0.951683611                                                |
| 0.001909461                                                  | 0.005479452                                   | 0.951453886                                                |
| 0.003631065                                                  | 0.011721373                                   | 0.94639269                                                 |
| 0.002018768                                                  | 0.005195168                                   | 0.916912615                                                |
| 0.016030563                                                  | 0.017186767                                   | 0.687235464                                                |
| 0.008652189                                                  | 0.012577796                                   | 0.881078357                                                |
| 0.002857075                                                  | 0.006967805                                   | 0.885569931                                                |
| 0.003694239                                                  | 0.00923615                                    | 0.968206183                                                |
| 0.001662982                                                  | 0.00405186                                    | 0.927179683                                                |
| 0.005052009                                                  | 0.009803103                                   | 0.801962487                                                |
| 0.004155366                                                  | 0.007798088                                   | 0.94786352                                                 |
| 0.002394859                                                  | 0.005292186                                   | 0.825694401                                                |
| 0.004010118                                                  | 0.008642952                                   | 0.880670896                                                |
| 0.004269252                                                  | 0.009347784                                   | 0.881329211                                                |
| 0.006162165                                                  | 0.011647327                                   | 0.833663956                                                |
| 0.004757338                                                  | 0.009020091                                   | 0.864037524                                                |
| 0.006041662                                                  | 0.017853427                                   | 0.973549727                                                |
| 0.001180444                                                  | 0.002486517                                   | 0.826330213                                                |
| 0.006355574                                                  | 0.013493686                                   | 0.929173875                                                |
| 0.008659389                                                  | 0.022529826                                   | 0.650364204                                                |
| 0.005235328                                                  | 0.008473661                                   | 0.766897126                                                |
| 0.002350219                                                  | 0.006214797                                   | 0.933210712                                                |
| 0.00507809                                                   | 0.012939242                                   | 0.966111772                                                |
| 0.00102042                                                   | 0.002625676                                   | 0.929941389                                                |
| 0.005418838                                                  | 0.01165455                                    | 0.86418698                                                 |
| 0.001417777                                                  | 0.005350295                                   | 0.966775068                                                |
| 0.004029793                                                  | 0.00686514                                    | 0.83982686                                                 |
| 0.001713702                                                  | 0.003390328                                   | 0.753219375                                                |
| 0.003594209                                                  | 0.006058075                                   | 0.704969012                                                |
| 0.003887483                                                  | 0.007797699                                   | 0.897153184                                                |
| 0.001212847                                                  | 0.004294163                                   | 0.981652949                                                |
| 0.004718898                                                  | 0.009050423                                   | 0.919783667                                                |
| 0.001279924                                                  | 0.003202465                                   | 0.917013434                                                |
| 0.001718052                                                  | 0.004721327                                   | 0.953719509                                                |
| 0.000557342                                                  | 0.001205115                                   | 0.935357418                                                |
| 0.010027391                                                  | 0.019602726                                   | 0.89721172                                                 |
| 0.004201533                                                  | 0.009887167                                   | 0.868584838                                                |
| 0.010108765                                                  | 0.019268438                                   | 0.76795403                                                 |
| 0.00130245                                                   | 0.003367375                                   | 0.950471647                                                |
| 0.008507398                                                  | 0.012944405                                   | 0.86963927                                                 |
| 0.003488153                                                  | 0.007154287                                   | 0.899516954                                                |
| 0.001431425                                                  | 0.003665714                                   | 0.887348537                                                |
| 0.004200655                                                  | 0.00980687                                    | 0.941362899                                                |
| 0.001645918                                                  | 0.005023978                                   | 0.947992541                                                |
| 0.001514556                                                  | 0.005010671                                   | 0.951097932                                                |
| 0.000937361                                                  | 0.002591132                                   | 0.940999552                                                |
| 0.004818539                                                  | 0.007990629                                   | 0.787938232                                                |
| 0.005536262                                                  | 0.012850374                                   | 0.856345706                                                |
| 0.006180489                                                  | 0.012093249                                   | 0.911152221                                                |
| 0.005231942                                                  | 0.011139166                                   | 0.823603217                                                |
| 0.002579817                                                  | 0.006314745                                   | 0.870947556                                                |
| 0.008593304                                                  | 0.011544105                                   | 0.866021973                                                |
| 0.002450415                                                  | 0.003958515                                   | 0.850689405                                                |
| 0.000746529                                                  | 0.001312612                                   | 0.887989884                                                |
| 0.01234959                                                   | 0.016142751                                   | 0.617539027                                                |
| 0.00317021                                                   | 0.008613833                                   | 0.951288276                                                |
| 0.000706715                                                  | 0.002352789                                   | 0.778644641                                                |
| 0.009322952                                                  | 0.015822331                                   | 0.911791239                                                |
| 0.00240718                                                   | 0.004970286                                   | 0.82958665                                                 |
| 0.008321308                                                  | 0.012808795                                   | 0.811634349                                                |
| 0.021533775                                                  | 0.038317774                                   | 0.762187872                                                |
| 0.001321974                                                  | 0.002247296                                   | 0.904490245                                                |
| 0.003223362                                                  | 0.005345073                                   | 0.968512                                                   |
| 0.002287943                                                  | 0.004537708                                   | 0.881986435                                                |
| 0.001707746                                                  | 0.004594327                                   | 0.919045205                                                |
| 0.001584963                                                  | 0.004908753                                   | 0.935130934                                                |
| 0.005731944                                                  | 0.00733793                                    | 0.7207333                                                  |
| 0.003726813                                                  | 0.006230795                                   | 0.96105434                                                 |
| 0.007737854                                                  | 0.024852227                                   | 0.78125                                                    |
| 0.006937045                                                  | 0.012528162                                   | 0.796658145                                                |
| 0.002857701                                                  | 0.005571435                                   | 0.929712401                                                |

| log.sigma.2.0.mm.3D_gldzm_LowIntensityEmphasis | log.sigma.2.0.mm.3D_gldzm_LargeDistanceEmphasis | log.sigma.2.0.mm.3D_gldzm_HighIntensitySmallDistanceEmphasis |
|------------------------------------------------|-------------------------------------------------|--------------------------------------------------------------|
| 0.013846512                                    | 1.128440367                                     | 298.6269113                                                  |
| 0.007191351                                    | 1.148026316                                     | 327.754523                                                   |
| 0.017065622                                    | 1.138888889                                     | 249.744213                                                   |
| 0.004330977                                    | 1.21187801                                      | 490.9067014                                                  |
| 0.011553942                                    | 1.171974522                                     | 338.0541401                                                  |
| 0.019977485                                    | 1.203571429                                     | 170.2607143                                                  |
| 0.013093601                                    | 1.719008264                                     | 289.7438017                                                  |
| 0.012218542                                    | 1.263265306                                     | 278.4765306                                                  |
| 0.007911933                                    | 1.114044351                                     | 327.3093981                                                  |
| 0.004885496                                    | 1.103074141                                     | 403.5818264                                                  |
| 0.015872422                                    | 1.199421965                                     | 190.6697977                                                  |
| 0.005794473                                    | 1.095070423                                     | 452.9854754                                                  |
| 0.013577285                                    | 1.129606099                                     | 191.2658831                                                  |
| 0.022928763                                    | 1.117241379                                     | 177.845977                                                   |
| 0.008676764                                    | 1.233409611                                     | 308.6270023                                                  |
| 0.006012893                                    | 1.152694611                                     | 302.6659805                                                  |
| 0.019581205                                    | 1.417218543                                     | 196.3807947                                                  |
| 0.013376149                                    | 1.076433121                                     | 217.3449045                                                  |
| 0.011260099                                    | 1.287356322                                     | 331.8362069                                                  |
| 0.007376924                                    | 1.081447964                                     | 271.107089                                                   |
| 0.005947662                                    | 1.164407778                                     | 315.4151444                                                  |
| 0.011436535                                    | 1.216455696                                     | 244.9996835                                                  |
| 0.010345693                                    | 1.087613293                                     | 229.5163646                                                  |
| 0.008485302                                    | 1.48                                            | 392.201                                                      |
| 0.010630828                                    | 1.145695364                                     | 237.6418322                                                  |
| 0.0084905                                      | 1.124567474                                     | 435.3555363                                                  |
| 0.005712823                                    | 1.172077922                                     | 388.5892857                                                  |
| 0.009461363                                    | 1.096774194                                     | 288.1816638                                                  |
| 0.009367536                                    | 1.104693141                                     | 322.1856197                                                  |
| 0.011418117                                    | 1.074315515                                     | 249.672425                                                   |
| 0.005820783                                    | 1.074678112                                     | 326.9497854                                                  |
| 0.013626022                                    | 1.082690187                                     | 184.1878445                                                  |
| 0.005706987                                    | 1.130289532                                     | 400.219098                                                   |
| 0.025253223                                    | 1.582089552                                     | 361.6977612                                                  |
| 0.016406491                                    | 1.19047619                                      | 327.3465608                                                  |
| 0.008705036                                    | 1.182781457                                     | 257.1672185                                                  |
| 0.010707142                                    | 1.048473968                                     | 278.798474                                                   |
| 0.00494346                                     | 1.11352657                                      | 394.5595813                                                  |
| 0.013807144                                    | 1.33431085                                      | 234.6986804                                                  |
| 0.01049098                                     | 1.080357143                                     | 318.0580357                                                  |
| 0.007563766                                    | 1.289370079                                     | 330.4183071                                                  |
| 0.010776492                                    | 1.191176471                                     | 261.3069853                                                  |
| 0.012181456                                    | 1.190045249                                     | 256.4611614                                                  |
| 0.016621641                                    | 1.274647887                                     | 285.5346244                                                  |
| 0.01144622                                     | 1.220090293                                     | 249.868228                                                   |
| 0.020861542                                    | 1.040214477                                     | 151.3746649                                                  |
| 0.002972643                                    | 1.288188976                                     | 590.2048556                                                  |
| 0.015412901                                    | 1.110294118                                     | 204.9503676                                                  |
| 0.027607862                                    | 1.677419355                                     | 323.9677419                                                  |
| 0.011587479                                    | 1.404081633                                     | 297.0408163                                                  |
| 0.007153901                                    | 1.103773585                                     | 290.0023585                                                  |
| 0.01550224                                     | 1.051724138                                     | 216.6393678                                                  |
| 0.003128511                                    | 1.109052031                                     | 550.7601568                                                  |
| 0.015046192                                    | 1.219827586                                     | 198.8200431                                                  |
| 0.006113432                                    | 1.050694025                                     | 300.7432106                                                  |
| 0.008445842                                    | 1.263383298                                     | 374.2392934                                                  |
| 0.003936563                                    | 1.432532348                                     | 533.8830869                                                  |
| 0.008448337                                    | 1.53960396                                      | 383.9863861                                                  |
| 0.010945671                                    | 1.163141994                                     | 302.6714502                                                  |
| 0.005039083                                    | 1.027777778                                     | 611.6057099                                                  |
| 0.012504941                                    | 1.125581395                                     | 286.5232558                                                  |
| 0.003760656                                    | 1.130123928                                     | 478.7185415                                                  |
| 0.006397452                                    | 1.071106095                                     | 335.1044018                                                  |
| 0.002483096                                    | 1.100318471                                     | 1258.741242                                                  |
| 0.025614616                                    | 1.163043478                                     | 202.5597826                                                  |
| 0.011605431                                    | 1.212121212                                     | 288.4361472                                                  |
| 0.023406435                                    | 1.401913876                                     | 250.8397129                                                  |
| 0.003825684                                    | 1.076229508                                     | 488.4821721                                                  |
| 0.01885527                                     | 1.210280374                                     | 247.3925234                                                  |
| 0.009116609                                    | 1.15916955                                      | 326.2099193                                                  |
| 0.004017426                                    | 1.179746835                                     | 436.7888186                                                  |
| 0.012069604                                    | 1.090697674                                     | 239.9622093                                                  |
| 0.005888442                                    | 1.080152672                                     | 332.3562341                                                  |
| 0.005872569                                    | 1.075240128                                     | 312.6938367                                                  |
| 0.003213761                                    | 1.09127789                                      | 517.9601927                                                  |
| 0.010491                                       | 1.361702128                                     | 345.5226064                                                  |
| 0.015795719                                    | 1.233684211                                     | 223.6905263                                                  |
| 0.014546248                                    | 1.139784946                                     | 245.2894265                                                  |
| 0.01415912                                     | 1.29326288                                      | 252.1733818                                                  |
| 0.007386031                                    | 1.208                                           | 309.7404444                                                  |
| 0.016270011                                    | 1.216606498                                     | 357.215704                                                   |
| 0.004787885                                    | 1.243774574                                     | 547.0285059                                                  |
| 0.001744399                                    | 1.178654292                                     | 1190.889791                                                  |
| 0.028969491                                    | 1.772727273                                     | 241.9886364                                                  |
| 0.009768461                                    | 1.074939565                                     | 232.8722804                                                  |
| 0.002862469                                    | 1.380222841                                     | 520.0388231                                                  |
| 0.022050268                                    | 1.138728324                                     | 231.2637283                                                  |
| 0.005922516                                    | 1.282157676                                     | 385.3443983                                                  |
| 0.021230227                                    | 1.315789474                                     | 201.5921053                                                  |
| 0.048552579                                    | 1.413793103                                     | 255.9439655                                                  |
| 0.003903067                                    | 1.150849858                                     | 835.305772                                                   |
| 0.006611704                                    | 1.048                                           | 476.6106667                                                  |
| 0.006490623                                    | 1.188916877                                     | 401.1782116                                                  |
| 0.005510973                                    | 1.126790831                                     | 344.2020057                                                  |
| 0.005618368                                    | 1.100682594                                     | 333.4236348                                                  |
| 0.010354608                                    | 1.503355705                                     | 609.147651                                                   |
| 0.010700217                                    | 1.059602649                                     | 362.3752759                                                  |
| 0.022550658                                    | 1.375                                           | 279.2569444                                                  |
| 0.0196699                                      | 1.344594595                                     | 180.2668919                                                  |
| 0.007552128                                    | 1.109422492                                     | 418.7363222                                                  |

| log.sigma.2.0.mm.3D_gldzm_LowIntensityLargeDistanceEmphasis | log.sigma.2.0.mm.3D_gldzm_HighIntensityEmphasis | log.sigma.2.0.mm.3D_gldzm_DistanceZoneVariability | log.sigma.2.0.mm.3D_gldzm_ZonePercentage |
|-------------------------------------------------------------|-------------------------------------------------|---------------------------------------------------|------------------------------------------|
| 0.01618451                                                  | 300.9663609                                     | 300.1987768                                       | 0.463172805                              |
| 0.010306444                                                 | 334.8980263                                     | 550.9605263                                       | 0.292729899                              |
| 0.039872217                                                 | 252.3935185                                     | 196.9259259                                       | 0.497695853                              |
| 0.005515998                                                 | 515.5609952                                     | 1082.430177                                       | 0.472865275                              |
| 0.033013148                                                 | 344.4840764                                     | 140.0318471                                       | 0.437325905                              |
| 0.037079816                                                 | 173.3892857                                     | 244.5785714                                       | 0.435458787                              |
| 0.044976197                                                 | 316.6198347                                     | 76.90082645                                       | 0.359050445                              |
| 0.026349383                                                 | 286.0285714                                     | 411.5469388                                       | 0.489021956                              |
| 0.009113805                                                 | 334.3864836                                     | 877.7370644                                       | 0.455507456                              |
| 0.0056562                                                   | 409.3607595                                     | 1032.611212                                       | 0.357004519                              |
| 0.030034523                                                 | 195.7919075                                     | 303.0578035                                       | 0.418379686                              |
| 0.006265904                                                 | 460.3679577                                     | 533.1408451                                       | 0.383265857                              |
| 0.016621658                                                 | 196.1994917                                     | 721.9377382                                       | 0.379459981                              |
| 0.034204698                                                 | 180.708046                                      | 402.3287356                                       | 0.389087657                              |
| 0.018471043                                                 | 324.2036613                                     | 374.2906178                                       | 0.479692645                              |
| 0.006839578                                                 | 314.0681138                                     | 1206.922156                                       | 0.192313229                              |
| 0.041667224                                                 | 209.5629139                                     | 229.6821192                                       | 0.432664756                              |
| 0.021054106                                                 | 218.2955414                                     | 746.0191083                                       | 0.336620926                              |
| 0.018106567                                                 | 341.5862069                                     | 215.789272                                        | 0.448453608                              |
| 0.008251306                                                 | 276.0030166                                     | 627.9773756                                       | 0.236701178                              |
| 0.007101605                                                 | 326.8520919                                     | 1521.193282                                       | 0.324846861                              |
| 0.021033503                                                 | 253.5924051                                     | 684.2253165                                       | 0.459302326                              |
| 0.012352365                                                 | 231.7995972                                     | 936.693857                                        | 0.363603076                              |
| 0.013419819                                                 | 428.66                                          | 182.8                                             | 0.51975052                               |
| 0.01290226                                                  | 244.0110375                                     | 411.1368653                                       | 0.376245847                              |
| 0.00994259                                                  | 439.017301                                      | 265.9965398                                       | 0.416426513                              |
| 0.006310528                                                 | 406.6363636                                     | 824.0800866                                       | 0.266589729                              |
| 0.0107324                                                   | 293.0305603                                     | 552.2258065                                       | 0.41102582                               |
| 0.011200056                                                 | 327.8002407                                     | 775.0240674                                       | 0.47082153                               |
| 0.01371405                                                  | 252.6166884                                     | 729.9413299                                       | 0.301730921                              |
| 0.006498292                                                 | 330.4223176                                     | 1108.443777                                       | 0.366467443                              |
| 0.01710379                                                  | 187.8555678                                     | 1716.75634                                        | 0.305902192                              |
| 0.00646886                                                  | 412.1213808                                     | 823.3875278                                       | 0.441711756                              |
| 0.093272816                                                 | 373.8656716                                     | 46.04477612                                       | 0.644230769                              |
| 0.020437679                                                 | 336.7830688                                     | 166.5238095                                       | 0.569277108                              |
| 0.010183693                                                 | 267.9761589                                     | 668.605298                                        | 0.373762376                              |
| 0.011916488                                                 | 280.927289                                      | 1078.581688                                       | 0.386805556                              |
| 0.005456894                                                 | 404.9098229                                     | 1151.557166                                       | 0.370304114                              |
| 0.037072571                                                 | 247.4486804                                     | 273.4692082                                       | 0.408383234                              |
| 0.01141954                                                  | 322.8727679                                     | 424.6428571                                       | 0.427073403                              |
| 0.015270106                                                 | 350.4940945                                     | 419.4527559                                       | 0.344640434                              |
| 0.015467934                                                 | 267.9117647                                     | 359.3137255                                       | 0.428121721                              |
| 0.026611748                                                 | 262.8989442                                     | 584.321267                                        | 0.403775883                              |
| 0.041063723                                                 | 292.4342723                                     | 355.1408451                                       | 0.415609756                              |
| 0.015053938                                                 | 261.3137698                                     | 765.537246                                        | 0.471778488                              |
| 0.022283681                                                 | 152.3217158                                     | 726.2680965                                       | 0.334829443                              |
| 0.003762905                                                 | 631.8635171                                     | 1574.159055                                       | 0.446554149                              |
| 0.018383804                                                 | 207.25                                          | 252.7352941                                       | 0.466552316                              |
| 0.103628625                                                 | 335.7258065                                     | 40.32258065                                       | 0.462686567                              |
| 0.020837566                                                 | 311.8816327                                     | 187.8897959                                       | 0.492957746                              |
| 0.008911041                                                 | 293.745283                                      | 1187.044025                                       | 0.371495327                              |
| 0.017162285                                                 | 217.8333333                                     | 336.2068966                                       | 0.420798065                              |
| 0.003479604                                                 | 562.6179615                                     | 1304.707769                                       | 0.367181366                              |
| 0.037340347                                                 | 201.2672414                                     | 200.4913793                                       | 0.392554992                              |
| 0.006797794                                                 | 302.8479179                                     | 1601.946288                                       | 0.254024222                              |
| 0.01263327                                                  | 390.117773                                      | 392.1991435                                       | 0.531285552                              |
| 0.006648873                                                 | 572.4380776                                     | 814.9833641                                       | 0.493388053                              |
| 0.024271727                                                 | 411.6930693                                     | 427.2112211                                       | 0.468677494                              |
| 0.024209441                                                 | 307.6223565                                     | 296.9577039                                       | 0.406633907                              |
| 0.005126531                                                 | 613.9783951                                     | 318.0555556                                       | 0.367763905                              |
| 0.014597429                                                 | 290.7093023                                     | 791.0139535                                       | 0.405851817                              |
| 0.004287815                                                 | 494.4556721                                     | 1923.894185                                       | 0.382986491                              |
| 0.006821143                                                 | 339.6264108                                     | 844.9954853                                       | 0.286731392                              |
| 0.002598117                                                 | 1281.176752                                     | 587.4044586                                       | 0.229952398                              |
| 0.076835197                                                 | 203.75                                          | 82.54347826                                       | 0.423963134                              |
| 0.021963252                                                 | 300.4978355                                     | 601.9292929                                       | 0.446233097                              |
| 0.053117054                                                 | 258.9138756                                     | 160.5023923                                       | 0.530456853                              |
| 0.004121119                                                 | 495.1098361                                     | 1159.57541                                        | 0.381607757                              |
| 0.02302911                                                  | 252.9439252                                     | 186.1028037                                       | 0.479820628                              |
| 0.011392951                                                 | 334.4209919                                     | 779.8811995                                       | 0.431128792                              |
| 0.005003238                                                 | 449.6109705                                     | 1051.508017                                       | 0.389802632                              |
| 0.014261274                                                 | 242.3186047                                     | 404.7860465                                       | 0.380868025                              |
| 0.006585033                                                 | 336.8829517                                     | 1490.244275                                       | 0.304179567                              |
| 0.00653584                                                  | 316.6467449                                     | 1782.357524                                       | 0.27903514                               |
| 0.003545585                                                 | 530.9939148                                     | 2783.476673                                       | 0.322222222                              |
| 0.026760706                                                 | 367.4680851                                     | 444.3971631                                       | 0.505376344                              |
| 0.03496036                                                  | 232.6463158                                     | 406.7642105                                       | 0.425246195                              |
| 0.019020527                                                 | 248.437276                                      | 254.2114695                                       | 0.457377049                              |
| 0.030818367                                                 | 262.4306473                                     | 623.4676354                                       | 0.429138322                              |
| 0.010073457                                                 | 322.8524444                                     | 979.816                                           | 0.395291637                              |
| 0.023684303                                                 | 363.6137184                                     | 239.8880866                                       | 0.549603175                              |
| 0.006015321                                                 | 576.6854522                                     | 649.0760157                                       | 0.568978374                              |
| 0.001931096                                                 | 1248.561485                                     | 1148.17092                                        | 0.463108883                              |
| 0.106717337                                                 | 253.0909091                                     | 40.75757576                                       | 0.455172414                              |
| 0.010766791                                                 | 236.4246575                                     | 1180.548751                                       | 0.365968741                              |
| 0.003664216                                                 | 589.2137883                                     | 1118.133705                                       | 0.262235208                              |
| 0.025558481                                                 | 235.8265896                                     | 315.4797688                                       | 0.444730077                              |
| 0.008783016                                                 | 398.9294606                                     | 599.791148                                        | 0.465850515                              |
| 0.029523695                                                 | 211.1052632                                     | 61.68421053                                       | 0.415300546                              |
| 0.071598556                                                 | 265.4482759                                     | 44.20689655                                       | 0.552380952                              |
| 0.004170915                                                 | 861.325779                                      | 1277.140227                                       | 0.355220126                              |
| 0.006877802                                                 | 479.9786667                                     | 363.192                                           | 0.531161473                              |
| 0.007627786                                                 | 419.7052897                                     | 350.1486146                                       | 0.388454012                              |
| 0.006504298                                                 | 353.1439828                                     | 1282.987106                                       | 0.341320293                              |
| 0.006305968                                                 | 339.6774744                                     | 1643.960182                                       | 0.302790217                              |
| 0.012804155                                                 | 648.3892617                                     | 107.3892617                                       | 0.588932806                              |
| 0.010917445                                                 | 368.1103753                                     | 435.3576159                                       | 0.372532895                              |
| 0.078196157                                                 | 283.0694444                                     | 56.25                                             | 0.585365854                              |
| 0.028378488                                                 | 188.2837838                                     | 117.9054054                                       | 0.390501319                              |
| 0.008321516                                                 | 423.7082067                                     | 305.8753799                                       | 0.407682776                              |

| log.sigma.2.0.mm.3D_gldzm_IntensityVariabilityNormalized | log.sigma.2.0.mm.3D_gldzm_LowIntensitySmallDistanceEmphasis | log.sigma.2.0.mm.3D_gldzm_IntensityVariability |
|----------------------------------------------------------|-------------------------------------------------------------|------------------------------------------------|
| 0.045516184                                              | 0.013262013                                                 | 14.88379205                                    |
| 0.048081501                                              | 0.006412578                                                 | 29.23355263                                    |
| 0.0468107                                                | 0.011363973                                                 | 10.11111111                                    |
| 0.040030505                                              | 0.004034722                                                 | 49.87800963                                    |
| 0.049210921                                              | 0.006189141                                                 | 7.72611465                                     |
| 0.059693878                                              | 0.015701902                                                 | 16.71428571                                    |
| 0.060310088                                              | 0.005122952                                                 | 7.297520661                                    |
| 0.042748855                                              | 0.008685832                                                 | 20.94693878                                    |
| 0.043189798                                              | 0.007611465                                                 | 40.90073918                                    |
| 0.048113365                                              | 0.004692821                                                 | 53.21338156                                    |
| 0.057469344                                              | 0.012331897                                                 | 19.88439306                                    |
| 0.042997421                                              | 0.005676615                                                 | 24.42253521                                    |
| 0.054925255                                              | 0.012816192                                                 | 43.22617535                                    |
| 0.05589642                                               | 0.020109779                                                 | 24.31494253                                    |
| 0.050243757                                              | 0.006228194                                                 | 21.95652174                                    |
| 0.056204955                                              | 0.005806222                                                 | 75.08982036                                    |
| 0.051993334                                              | 0.014059701                                                 | 15.70198675                                    |
| 0.051317295                                              | 0.011456666                                                 | 40.28407643                                    |
| 0.045844894                                              | 0.009548482                                                 | 11.96551724                                    |
| 0.060789091                                              | 0.007158329                                                 | 40.30316742                                    |
| 0.051382922                                              | 0.005659176                                                 | 87.19681791                                    |
| 0.048431341                                              | 0.009037293                                                 | 38.26075949                                    |
| 0.05429649                                               | 0.009844025                                                 | 53.9164149                                     |
| 0.04576                                                  | 0.007251672                                                 | 11.44                                          |
| 0.052302774                                              | 0.01006297                                                  | 23.69315673                                    |
| 0.044958753                                              | 0.008127478                                                 | 12.99307958                                    |
| 0.053020933                                              | 0.005563397                                                 | 48.99134199                                    |
| 0.047437313                                              | 0.009143604                                                 | 27.94057725                                    |
| 0.044956202                                              | 0.008909406                                                 | 37.35860409                                    |
| 0.047811535                                              | 0.010844133                                                 | 36.6714472                                     |
| 0.052725967                                              | 0.005651406                                                 | 61.42575107                                    |
| 0.05746497                                               | 0.01275658                                                  | 104.2414553                                    |
| 0.04319175                                               | 0.005516519                                                 | 38.78619154                                    |
| 0.050568055                                              | 0.008248324                                                 | 3.388059701                                    |
| 0.044427648                                              | 0.015398694                                                 | 8.396825397                                    |
| 0.051645103                                              | 0.008335372                                                 | 38.99205298                                    |
| 0.042823667                                              | 0.010404805                                                 | 47.70556553                                    |
| 0.049162304                                              | 0.004815102                                                 | 61.05958132                                    |
| 0.054944488                                              | 0.007990787                                                 | 18.73607038                                    |
| 0.046635842                                              | 0.01025884                                                  | 20.89285714                                    |
| 0.047538595                                              | 0.00563718                                                  | 24.1496063                                     |
| 0.049247885                                              | 0.009603632                                                 | 20.09313725                                    |
| 0.049409763                                              | 0.008573883                                                 | 32.7586727                                     |
| 0.043201305                                              | 0.010511121                                                 | 18.40375587                                    |
| 0.048392603                                              | 0.010544291                                                 | 42.8758465                                     |
| 0.059854523                                              | 0.020506007                                                 | 44.65147453                                    |
| 0.042380254                                              | 0.002775078                                                 | 80.7343832                                     |
| 0.053984645                                              | 0.014670176                                                 | 14.6832353                                     |
| 0.055671176                                              | 0.008602671                                                 | 3.451612903                                    |
| 0.048263224                                              | 0.009274957                                                 | 11.8244898                                     |
| 0.050262549                                              | 0.006714616                                                 | 63.93396226                                    |
| 0.051674594                                              | 0.015087229                                                 | 17.98275862                                    |
| 0.046912506                                              | 0.003040738                                                 | 65.81824661                                    |
| 0.061422414                                              | 0.009472653                                                 | 14.25                                          |
| 0.052573727                                              | 0.005942341                                                 | 87.11466506                                    |
| 0.039502222                                              | 0.007398985                                                 | 18.44753747                                    |
| 0.040006013                                              | 0.003258486                                                 | 43.28650647                                    |
| 0.042985982                                              | 0.004492489                                                 | 26.04950495                                    |
| 0.04644901                                               | 0.007629729                                                 | 15.37462236                                    |
| 0.06544353                                               | 0.005017221                                                 | 21.2037037                                     |
| 0.047352623                                              | 0.011981819                                                 | 40.72325581                                    |
| 0.043326933                                              | 0.003628867                                                 | 90.89990467                                    |
| 0.056655066                                              | 0.006291529                                                 | 50.19638826                                    |
| 0.053364234                                              | 0.00245434                                                  | 33.51273885                                    |
| 0.061672968                                              | 0.012809471                                                 | 5.673913043                                    |
| 0.044333252                                              | 0.009015976                                                 | 30.72294372                                    |
| 0.045626245                                              | 0.01597878                                                  | 9.535885167                                    |
| 0.047229239                                              | 0.003751807                                                 | 57.61967213                                    |
| 0.05367281                                               | 0.01781181                                                  | 11.48598131                                    |
| 0.044128622                                              | 0.008547523                                                 | 38.25951557                                    |
| 0.04844594                                               | 0.003770973                                                 | 57.40843882                                    |
| 0.052082207                                              | 0.011521687                                                 | 22.39534884                                    |
| 0.049764809                                              | 0.005714295                                                 | 78.2302799                                     |
| 0.05454122                                               | 0.005706751                                                 | 102.2102455                                    |
| 0.046930409                                              | 0.003130805                                                 | 138.8201487                                    |
| 0.041125949                                              | 0.006423573                                                 | 23.19503546                                    |
| 0.050176177                                              | 0.011004559                                                 | 23.83368421                                    |
| 0.051451035                                              | 0.013427678                                                 | 14.35483871                                    |
| 0.046765634                                              | 0.00994308                                                  | 35.4015852                                     |
| 0.046178765                                              | 0.006714174                                                 | 51.95111111                                    |
| 0.04033677                                               | 0.014416438                                                 | 11.1732852                                     |
| 0.036589032                                              | 0.004481026                                                 | 27.91743119                                    |
| 0.039782899                                              | 0.001697725                                                 | 51.43928848                                    |
| 0.048209366                                              | 0.009532529                                                 | 3.181818182                                    |
| 0.05455752                                               | 0.009518879                                                 | 67.70588235                                    |
| 0.053779261                                              | 0.002662033                                                 | 77.2270195                                     |
| 0.051271342                                              | 0.021173215                                                 | 17.73988439                                    |
| 0.047242453                                              | 0.005207391                                                 | 34.15629322                                    |
| 0.07132964                                               | 0.01915686                                                  | 5.421052632                                    |
| 0.064803805                                              | 0.042791084                                                 | 3.75862069                                     |
| 0.044394867                                              | 0.003836105                                                 | 62.68555241                                    |
| 0.038307556                                              | 0.00654518                                                  | 14.36533333                                    |
| 0.045727084                                              | 0.006206332                                                 | 18.15365239                                    |
| 0.049261706                                              | 0.005262642                                                 | 68.76934097                                    |
| 0.053521623                                              | 0.005446468                                                 | 94.09101251                                    |
| 0.034998423                                              | 0.009742221                                                 | 5.214765101                                    |
| 0.046464824                                              | 0.01064591                                                  | 21.04856512                                    |
| 0.049382716                                              | 0.008639283                                                 | 3.555555556                                    |
| 0.056519357                                              | 0.017492754                                                 | 8.364864865                                    |
| 0.040566883                                              | 0.007359781                                                 | 13.34650456                                    |

| log.sigma.2.0.mm.3D_gldzm_HighIntensityLargeDistanceEmphasis | log.sigma.2.0.mm.3D_gldzm_SmallDistanceEmphasis | log.sigma.2.0.mm.3D_gldzm_SumVariance | log.sigma.2.0.mm.3D_gldzm_Homogeneity1 |
|--------------------------------------------------------------|-------------------------------------------------|---------------------------------------|----------------------------------------|
| 320.324159                                                   | 0.967889908                                     | 685.0342448                           | 0.275066118                            |
| 363.4720395                                                  | 0.962993421                                     | 803.6777793                           | 0.384204566                            |
| 262.9907407                                                  | 0.965277778                                     | 498.4912875                           | 0.282716748                            |
| 614.1781701                                                  | 0.947030498                                     | 1430.214073                           | 0.264368129                            |
| 370.2038217                                                  | 0.957006369                                     | 935.1833397                           | 0.290184065                            |
| 185.9035714                                                  | 0.949107143                                     | 362.387709                            | 0.310500769                            |
| 424.1239669                                                  | 0.820247934                                     | 1025.167816                           | 0.331467279                            |
| 316.2367347                                                  | 0.934183673                                     | 696.3832026                           | 0.26060568                             |
| 362.6948258                                                  | 0.971488912                                     | 878.5238115                           | 0.276573571                            |
| 432.4764919                                                  | 0.974231465                                     | 993.2762055                           | 0.327984025                            |
| 216.2803468                                                  | 0.950144509                                     | 452.1501225                           | 0.303242184                            |
| 489.8978873                                                  | 0.976232394                                     | 1145.795217                           | 0.301924104                            |
| 215.9339263                                                  | 0.967598475                                     | 465.7828287                           | 0.320646322                            |
| 192.1563218                                                  | 0.970689655                                     | 378.0821871                           | 0.321479471                            |
| 386.5102975                                                  | 0.941647597                                     | 898.3668864                           | 0.273679992                            |
| 359.6766467                                                  | 0.961826347                                     | 754.8926387                           | 0.478679969                            |
| 262.2913907                                                  | 0.895695364                                     | 474.7747619                           | 0.29554305                             |
| 222.0980892                                                  | 0.98089172                                      | 434.1399739                           | 0.340599276                            |
| 380.5862069                                                  | 0.92816092                                      | 857.9538593                           | 0.272874486                            |
| 295.586727                                                   | 0.979638009                                     | 604.1407756                           | 0.419107686                            |
| 372.5998821                                                  | 0.958898055                                     | 771.1594327                           | 0.368020002                            |
| 287.9632911                                                  | 0.945886076                                     | 559.3339426                           | 0.287158584                            |
| 240.9325277                                                  | 0.978096677                                     | 487.7125207                           | 0.344944906                            |
| 574.496                                                      | 0.88                                            | 1233.761103                           | 0.253348705                            |
| 269.4878587                                                  | 0.963576159                                     | 534.6220474                           | 0.341815369                            |
| 453.6643599                                                  | 0.968858131                                     | 1051.830143                           | 0.3054218                              |
| 478.8246753                                                  | 0.956980519                                     | 1065.397278                           | 0.3939454                              |
| 312.426146                                                   | 0.975806452                                     | 634.8083855                           | 0.319362407                            |
| 350.2587244                                                  | 0.973826715                                     | 906.5429549                           | 0.274905047                            |
| 264.3937419                                                  | 0.981421121                                     | 548.9692141                           | 0.390489784                            |
| 344.3124464                                                  | 0.981330472                                     | 742.9066412                           | 0.333084609                            |
| 202.5264609                                                  | 0.979327453                                     | 381.3102471                           | 0.381567095                            |
| 459.7305122                                                  | 0.967427617                                     | 1084.369724                           | 0.281764015                            |
| 422.5373134                                                  | 0.854477612                                     | 1039.234531                           | 0.245936429                            |
| 374.5291005                                                  | 0.952380952                                     | 818.0676186                           | 0.240442288                            |
| 311.2119205                                                  | 0.954304636                                     | 699.1348902                           | 0.313729794                            |
| 289.4425494                                                  | 0.987881508                                     | 603.8181086                           | 0.309805661                            |
| 446.310789                                                   | 0.971618357                                     | 1086.20852                            | 0.313431039                            |
| 298.4486804                                                  | 0.916422287                                     | 657.5982327                           | 0.300365108                            |
| 342.1316964                                                  | 0.979910714                                     | 780.6824746                           | 0.290751624                            |
| 430.7972441                                                  | 0.92765748                                      | 924.1191783                           | 0.337028914                            |
| 294.3308824                                                  | 0.952205882                                     | 669.7829928                           | 0.29216648                             |
| 288.6500754                                                  | 0.952488688                                     | 674.2290721                           | 0.291534432                            |
| 320.0328638                                                  | 0.931338028                                     | 703.9756995                           | 0.282973629                            |
| 307.0959368                                                  | 0.944977427                                     | 700.0833735                           | 0.27791703                             |
| 156.1099196                                                  | 0.989946381                                     | 263.3298183                           | 0.368546389                            |
| 798.4981627                                                  | 0.927952756                                     | 1861.849687                           | 0.28238368                             |
| 216.4485294                                                  | 0.972426471                                     | 452.7575885                           | 0.280793904                            |
| 382.7580645                                                  | 0.830645161                                     | 895.1293122                           | 0.289509336                            |
| 371.244898                                                   | 0.898979592                                     | 840.2910068                           | 0.267252419                            |
| 308.7169811                                                  | 0.974056604                                     | 708.5333295                           | 0.332182177                            |
| 222.6091954                                                  | 0.987068966                                     | 514.6176482                           | 0.293236476                            |
| 610.0491803                                                  | 0.972736992                                     | 1587.466778                           | 0.32947665                             |
| 211.0560345                                                  | 0.945043103                                     | 434.2344837                           | 0.321903211                            |
| 311.2667471                                                  | 0.987326494                                     | 730.8512192                           | 0.414905525                            |
| 453.6316916                                                  | 0.934154176                                     | 1000.359978                           | 0.236884781                            |
| 726.6580407                                                  | 0.891866913                                     | 1552.45109                            | 0.251359177                            |
| 522.519802                                                   | 0.86509901                                      | 1178.676736                           | 0.262474033                            |
| 327.4259819                                                  | 0.959214502                                     | 752.2611506                           | 0.324527409                            |
| 623.4691358                                                  | 0.993055556                                     | 1723.626972                           | 0.338356573                            |
| 307.4534884                                                  | 0.968604651                                     | 666.2126966                           | 0.294942301                            |
| 557.4041945                                                  | 0.967469018                                     | 1364.215152                           | 0.316360492                            |
| 357.714447                                                   | 0.982223476                                     | 874.8244636                           | 0.387491204                            |
| 1370.91879                                                   | 0.974920382                                     | 4361.089833                           | 0.438741501                            |
| 208.5108696                                                  | 0.95923913                                      | 364.9505718                           | 0.310429515                            |
| 348.7445887                                                  | 0.946969697                                     | 723.9835396                           | 0.284979882                            |
| 291.2105263                                                  | 0.899521531                                     | 625.9475035                           | 0.256768324                            |
| 521.6204918                                                  | 0.980942623                                     | 1282.193031                           | 0.303320196                            |
| 275.1495327                                                  | 0.947429907                                     | 583.8131953                           | 0.280866833                            |
| 367.2652826                                                  | 0.960207612                                     | 827.0575302                           | 0.287316946                            |
| 500.8995781                                                  | 0.955063291                                     | 1151.783383                           | 0.307422895                            |
| 251.744186                                                   | 0.977325581                                     | 538.0327409                           | 0.312181238                            |
| 354.9898219                                                  | 0.979961832                                     | 804.9865233                           | 0.365798307                            |
| 332.4583778                                                  | 0.981189968                                     | 776.6665802                           | 0.38214917                             |
| 583.1288032                                                  | 0.977180527                                     | 1578.601156                           | 0.364664871                            |
| 455.25                                                       | 0.909574468                                     | 990.8000957                           | 0.243735092                            |
| 268.4694737                                                  | 0.941578947                                     | 548.366675                            | 0.293708518                            |
| 261.0286738                                                  | 0.965053763                                     | 501.9425223                           | 0.287942621                            |
| 303.4597094                                                  | 0.92668428                                      | 609.0615642                           | 0.289906619                            |
| 375.3004444                                                  | 0.948                                           | 777.2068434                           | 0.299194379                            |
| 389.2057762                                                  | 0.945848375                                     | 836.0179108                           | 0.241850692                            |
| 695.3132372                                                  | 0.939056356                                     | 1612.199126                           | 0.227010465                            |
| 1479.24826                                                   | 0.955336427                                     | 4049.000388                           | 0.272740995                            |
| 297.5                                                        | 0.806818182                                     | 753.3062859                           | 0.282009236                            |
| 250.634166                                                   | 0.981265109                                     | 534.1912256                           | 0.332825505                            |
| 865.913649                                                   | 0.90494429                                      | 1688.027968                           | 0.381135445                            |
| 254.0780347                                                  | 0.965317919                                     | 453.659971                            | 0.298263284                            |
| 453.2697095                                                  | 0.929460581                                     | 1095.602276                           | 0.260657539                            |
| 249.1578947                                                  | 0.921052632                                     | 546.4905385                           | 0.327157366                            |
| 303.4655172                                                  | 0.896551724                                     | 748.6361308                           | 0.261567347                            |
| 965.4058074                                                  | 0.962287535                                     | 2717.69251                            | 0.335440095                            |
| 493.4506667                                                  | 0.988                                           | 1119.891807                           | 0.250142553                            |
| 493.813602                                                   | 0.952770781                                     | 1160.022188                           | 0.33903917                             |
| 388.9118911                                                  | 0.968302292                                     | 911.1962683                           | 0.336163459                            |
| 364.6928328                                                  | 0.974829352                                     | 815.6264152                           | 0.353133401                            |
| 805.3557047                                                  | 0.874161074                                     | 1805.803084                           | 0.222890824                            |
| 391.0507726                                                  | 0.985099338                                     | 1155.21414                            | 0.30427915                             |
| 298.3194444                                                  | 0.90625                                         | 709.7108241                           | 0.249012259                            |
| 220.3513514                                                  | 0.913851351                                     | 480.1531502                           | 0.321547986                            |
| 443.5957447                                                  | 0.972644377                                     | 971.841484                            | 0.317236192                            |

| log.sigma.2.0.mm.3D_glmc_Homogeneity2 | log.sigma.2.0.mm.3D_glmc_ClusterShade | log.sigma.2.0.mm.3D_glmc_MaximumProbability | log.sigma.2.0.mm.3D_glmc_Ldmn | log.sigma.2.0.mm.3D_glmc_SumVariance2 |
|---------------------------------------|---------------------------------------|---------------------------------------------|-------------------------------|---------------------------------------|
| 0.187325962                           | 185.8019324                           | 0.012263393                                 | 0.961139047                   | 73.2587982                            |
| 0.311716757                           | 124.1823982                           | 0.054249413                                 | 0.971527818                   | 51.21211361                           |
| 0.19716407                            | 411.850078                            | 0.019995758                                 | 0.960153281                   | 71.78838414                           |
| 0.178943852                           | 141.5891955                           | 0.010385638                                 | 0.964481128                   | 97.82493709                           |
| 0.198947192                           | 21.98518515                           | 0.019483479                                 | 0.968670775                   | 72.86740391                           |
| 0.220445807                           | 65.73472068                           | 0.017010906                                 | 0.949572224                   | 47.73627399                           |
| 0.245312625                           | -168.1427728                          | 0.030052368                                 | 0.96304402                    | 38.45891349                           |
| 0.174569293                           | 60.54374224                           | 0.010320573                                 | 0.943670803                   | 98.93551563                           |
| 0.188025679                           | 76.77376094                           | 0.00800334                                  | 0.962608552                   | 81.48743945                           |
| 0.243634094                           | 219.7503796                           | 0.02298863                                  | 0.978082983                   | 49.33815759                           |
| 0.214438495                           | -63.01723052                          | 0.015332192                                 | 0.943944239                   | 51.11966421                           |
| 0.216135212                           | 267.9133386                           | 0.015711203                                 | 0.972965516                   | 63.20996471                           |
| 0.231062832                           | 130.5790742                           | 0.012041808                                 | 0.972868468                   | 50.13982525                           |
| 0.232937446                           | 82.77172301                           | 0.014112833                                 | 0.960884762                   | 55.16102058                           |
| 0.180887293                           | -49.61842048                          | 0.012333161                                 | 0.964380199                   | 55.34816569                           |
| 0.420564417                           | 119.8582821                           | 0.122990403                                 | 0.987443585                   | 30.64372857                           |
| 0.205995905                           | 10.34988722                           | 0.011990778                                 | 0.956518354                   | 69.51961689                           |
| 0.255916879                           | 269.841603                            | 0.01502973                                  | 0.965675023                   | 60.42324771                           |
| 0.182492861                           | -7.527692232                          | 0.012782911                                 | 0.954500423                   | 87.39308512                           |
| 0.347714813                           | 86.48611503                           | 0.053683216                                 | 0.974714298                   | 35.2826925                            |
| 0.290138917                           | 111.5540806                           | 0.050822642                                 | 0.976356992                   | 38.07573007                           |
| 0.195630928                           | 270.1224452                           | 0.009628828                                 | 0.96243848                    | 67.73124953                           |
| 0.260750985                           | 191.9310209                           | 0.019530339                                 | 0.967945996                   | 48.96802685                           |
| 0.163019814                           | -220.6086418                          | 0.015815194                                 | 0.955212106                   | 75.11079648                           |
| 0.259107778                           | 164.2874573                           | 0.023518632                                 | 0.976333707                   | 42.61555715                           |
| 0.222693026                           | 245.2248496                           | 0.018654493                                 | 0.964670493                   | 67.44969109                           |
| 0.31962907                            | 134.7163453                           | 0.056249916                                 | 0.98188834                    | 34.27284774                           |
| 0.234913267                           | 289.0617581                           | 0.02072908                                  | 0.967502911                   | 55.7708234                            |
| 0.188041836                           | -186.8432966                          | 0.012099859                                 | 0.948216215                   | 87.15879806                           |
| 0.317931988                           | 138.8925701                           | 0.060453083                                 | 0.976637218                   | 47.23806646                           |
| 0.248701425                           | 174.7176899                           | 0.023360333                                 | 0.977202149                   | 43.38743864                           |
| 0.30159711                            | 139.7179669                           | 0.037811991                                 | 0.977144984                   | 42.32377514                           |
| 0.196214326                           | 152.6344292                           | 0.008902758                                 | 0.966154824                   | 79.03440269                           |
| 0.159750816                           | -440.5042789                          | 0.040723571                                 | 0.93929267                    | 100.299151                            |
| 0.151837421                           | -146.2311427                          | 0.013749883                                 | 0.932996948                   | 96.29707882                           |
| 0.224530647                           | -6.615976954                          | 0.009832013                                 | 0.964319253                   | 60.37665972                           |
| 0.228311046                           | 323.1996546                           | 0.023407921                                 | 0.96555738                    | 72.39481285                           |
| 0.227849284                           | 37.47296541                           | 0.016800309                                 | 0.969714755                   | 49.25108755                           |
| 0.211433154                           | -126.7786578                          | 0.014810007                                 | 0.958195144                   | 58.79789021                           |
| 0.205281862                           | 55.69933212                           | 0.010836188                                 | 0.960560478                   | 67.36106515                           |
| 0.256522423                           | 61.75951201                           | 0.020291517                                 | 0.96822205                    | 49.99898758                           |
| 0.202748651                           | 49.40047958                           | 0.012188193                                 | 0.961365891                   | 73.34065738                           |
| 0.203922536                           | -40.81173807                          | 0.013476787                                 | 0.953125288                   | 73.19670597                           |
| 0.195939279                           | 84.24548616                           | 0.012277426                                 | 0.956492596                   | 84.00761902                           |
| 0.187275508                           | -67.04670682                          | 0.009845815                                 | 0.953342479                   | 64.79842014                           |
| 0.287225508                           | 132.0790859                           | 0.026251733                                 | 0.970764453                   | 35.01117371                           |
| 0.196095394                           | 96.31357296                           | 0.012087598                                 | 0.973368576                   | 76.37542982                           |
| 0.189326977                           | 117.7639977                           | 0.011878451                                 | 0.946735489                   | 64.80806882                           |
| 0.206027527                           | -758.2573401                          | 0.037487831                                 | 0.951287079                   | 86.43543871                           |
| 0.177707482                           | -153.7741294                          | 0.019737613                                 | 0.961395419                   | 79.05376286                           |
| 0.249095645                           | 113.1364909                           | 0.02650786                                  | 0.968653924                   | 52.02562831                           |
| 0.206564201                           | -2.465826256                          | 0.01549248                                  | 0.938503731                   | 72.69023486                           |
| 0.24851396                            | 181.6655882                           | 0.021587653                                 | 0.978206323                   | 65.63223781                           |
| 0.232680728                           | 39.96294282                           | 0.016357825                                 | 0.962838725                   | 45.67215158                           |
| 0.34764997                            | 104.3166869                           | 0.073588776                                 | 0.978020192                   | 44.96650885                           |
| 0.149763891                           | 130.8304618                           | 0.008656597                                 | 0.950453665                   | 99.6236853                            |
| 0.165716576                           | 9.696871184                           | 0.008044158                                 | 0.968106829                   | 110.0027207                           |
| 0.174322051                           | -428.7490632                          | 0.012674425                                 | 0.955329102                   | 84.77799289                           |
| 0.240665339                           | -1.855340321                          | 0.039096543                                 | 0.968344679                   | 56.85027076                           |
| 0.248169779                           | 30.44812911                           | 0.018686272                                 | 0.981864928                   | 39.11383877                           |
| 0.206612372                           | 214.5822585                           | 0.012549343                                 | 0.960477309                   | 69.4121304                            |
| 0.23436191                            | 368.2759439                           | 0.021833457                                 | 0.974352396                   | 78.52917494                           |
| 0.311514249                           | 56.63946886                           | 0.040935562                                 | 0.977946312                   | 35.38296488                           |
| 0.373987337                           | -46.15966228                          | 0.080489609                                 | 0.989065475                   | 37.68449854                           |
| 0.219460201                           | 41.18619941                           | 0.02053325                                  | 0.946953279                   | 57.58196643                           |
| 0.199999511                           | 165.1176461                           | 0.015469033                                 | 0.962993584                   | 77.25551397                           |
| 0.168932588                           | -173.1527329                          | 0.015127659                                 | 0.937784551                   | 83.124249                             |
| 0.218008935                           | 242.3496857                           | 0.012850399                                 | 0.97425007                    | 73.26638183                           |
| 0.188402301                           | 48.75881499                           | 0.013782592                                 | 0.948895058                   | 64.38851575                           |
| 0.203192359                           | 191.5948282                           | 0.011234784                                 | 0.962036487                   | 74.24108143                           |
| 0.221519968                           | 216.0433386                           | 0.013097423                                 | 0.968876651                   | 62.19197699                           |
| 0.224915034                           | 150.4458563                           | 0.013831587                                 | 0.961261801                   | 65.39603312                           |
| 0.288303275                           | 163.2548006                           | 0.033602865                                 | 0.972680364                   | 46.78757994                           |
| 0.306550055                           | 115.896143                            | 0.0242360539                                | 0.978107411                   | 39.42692823                           |
| 0.288512912                           | 165.1013958                           | 0.029142313                                 | 0.98104338                    | 52.14955467                           |
| 0.156602721                           | -116.506755                           | 0.008502841                                 | 0.943998647                   | 94.77881388                           |
| 0.206032425                           | 34.71189918                           | 0.011767544                                 | 0.961445772                   | 66.97411334                           |
| 0.199306254                           | 273.5427825                           | 0.01586394                                  | 0.947788961                   | 68.36664994                           |
| 0.20181496                            | 114.436606                            | 0.011690041                                 | 0.953636177                   | 71.96388857                           |
| 0.215065114                           | 176.4090693                           | 0.01289887                                  | 0.971145831                   | 63.33208966                           |
| 0.152664633                           | 122.4419082                           | 0.011688454                                 | 0.948446835                   | 93.50173815                           |
| 0.140533456                           | 9.510242319                           | 0.006771728                                 | 0.955177063                   | 127.0877586                           |
| 0.19012894                            | -44.35390915                          | 0.013776892                                 | 0.976649473                   | 94.31518615                           |
| 0.191922035                           | -374.7005176                          | 0.025446576                                 | 0.948560541                   | 87.54217301                           |
| 0.24692238                            | 120.4805572                           | 0.01534537                                  | 0.965550384                   | 51.21747504                           |
| 0.304483273                           | 173.3451985                           | 0.038136993                                 | 0.988687292                   | 40.72073471                           |
| 0.208692787                           | 230.2838546                           | 0.018113673                                 | 0.955165633                   | 66.04622172                           |
| 0.172336145                           | -171.1832074                          | 0.009987939                                 | 0.95140018                    | 89.40705546                           |
| 0.238698655                           | -59.48830849                          | 0.029083162                                 | 0.950307239                   | 39.76483948                           |
| 0.180088459                           | -449.7971899                          | 0.035756377                                 | 0.900417576                   | 83.70333621                           |
| 0.257408618                           | -45.27367221                          | 0.034585142                                 | 0.979199643                   | 64.35548457                           |
| 0.162733022                           | 650.8949399                           | 0.013802724                                 | 0.960794881                   | 94.166025                             |
| 0.261802237                           | 7.844959356                           | 0.057523371                                 | 0.962743192                   | 54.02025243                           |
| 0.253792377                           | 104.3596742                           | 0.022432382                                 | 0.97584886                    | 46.16767478                           |
| 0.271056632                           | 81.18767731                           | 0.024156658                                 | 0.976853566                   | 41.03982863                           |
| 0.13849825                            | 391.6607405                           | 0.017541245                                 | 0.948734146                   | 164.0767084                           |
| 0.216458607                           | -155.6164117                          | 0.017092008                                 | 0.967520456                   | 55.69774647                           |
| 0.160201736                           | -322.7790676                          | 0.023887927                                 | 0.934389207                   | 99.31008994                           |
| 0.229977363                           | 18.85430846                           | 0.018832123                                 | 0.964221636                   | 49.88004131                           |
| 0.23494947                            | 551.7023029                           | 0.023370201                                 | 0.970128092                   | 71.23636774                           |

| log.sigma.2.0.mm.3D_glc_m_Contrast | log.sigma.2.0.mm.3D_glc_m_DifferenceEntropy | log.sigma.2.0.mm.3D_glc_m_InverseVariance | log.sigma.2.0.mm.3D_glc_m_Entropy | log.sigma.2.0.mm.3D_glc_m_Dissimilarity |
|------------------------------------|---------------------------------------------|-------------------------------------------|-----------------------------------|-----------------------------------------|
| 53.97704895                        | 3.903080085                                 | 0.192936605                               | 8.30009325                        | 5.611667073                             |
| 35.20153296                        | 3.537165222                                 | 0.274766394                               | 7.838294512                       | 4.054008271                             |
| 56.09761934                        | 3.879241815                                 | 0.204402026                               | 7.795881329                       | 5.608159546                             |
| 70.67979108                        | 4.109612436                                 | 0.180634882                               | 9.078788002                       | 6.324163871                             |
| 37.83269274                        | 3.633993121                                 | 0.211465409                               | 7.711645511                       | 4.761799199                             |
| 31.23522364                        | 3.553723959                                 | 0.22774786                                | 7.812771637                       | 4.324788456                             |
| 31.14265836                        | 3.477813468                                 | 0.252196784                               | 7.123342733                       | 4.12844074                              |
| 64.34148243                        | 4.039342148                                 | 0.181490525                               | 8.671538626                       | 6.175410238                             |
| 51.83568202                        | 3.907636032                                 | 0.195381232                               | 8.758030095                       | 5.491397573                             |
| 36.45657646                        | 3.648178208                                 | 0.248760592                               | 8.077418205                       | 4.399257059                             |
| 35.25448374                        | 3.624423079                                 | 0.222035781                               | 7.967599883                       | 4.589270932                             |
| 48.11491749                        | 3.810143208                                 | 0.225112367                               | 8.297822055                       | 5.074433693                             |
| 28.61281944                        | 3.499137638                                 | 0.239959703                               | 8.041440603                       | 4.09887394                              |
| 30.05942525                        | 3.522914717                                 | 0.234093948                               | 7.992639728                       | 4.194952012                             |
| 43.74653735                        | 3.779660309                                 | 0.193201005                               | 8.232044108                       | 5.134062757                             |
| 21.08628011                        | 3.08367268                                  | 0.341863468                               | 6.817285697                       | 2.796943638                             |
| 39.15166913                        | 3.682802863                                 | 0.210369823                               | 8.093397895                       | 4.816382803                             |
| 31.00005549                        | 3.52569897                                  | 0.256321359                               | 8.118000702                       | 4.06043882                              |
| 51.12240529                        | 3.854472753                                 | 0.187389779                               | 8.279067679                       | 5.469406453                             |
| 20.84386101                        | 3.224866736                                 | 0.309269493                               | 7.414400532                       | 3.1343945                               |
| 30.1657523                         | 3.524612876                                 | 0.267995595                               | 7.769639154                       | 3.914798471                             |
| 41.20136854                        | 3.743419258                                 | 0.202795155                               | 8.420403357                       | 4.920351574                             |
| 28.45735722                        | 3.480891986                                 | 0.261845395                               | 7.917862609                       | 3.929409514                             |
| 59.17885163                        | 3.967858262                                 | 0.170606133                               | 8.116706369                       | 6.002958313                             |
| 34.27575167                        | 3.571619588                                 | 0.260191402                               | 7.698516064                       | 4.183319714                             |
| 53.05063036                        | 3.839199179                                 | 0.229104781                               | 8.082896936                       | 5.248712146                             |
| 25.63195269                        | 3.385014098                                 | 0.29359574                                | 7.510218246                       | 3.511691091                             |
| 43.05999388                        | 3.732365232                                 | 0.236531853                               | 8.000406205                       | 4.733611415                             |
| 59.61054155                        | 3.951078345                                 | 0.194060975                               | 8.61476357                        | 5.791917452                             |
| 32.22214141                        | 3.484384946                                 | 0.288317121                               | 7.713027421                       | 3.829765753                             |
| 34.25643072                        | 3.613695232                                 | 0.246774322                               | 7.943222757                       | 4.28334254                              |
| 21.08842122                        | 3.293081519                                 | 0.286477                                  | 7.732689258                       | 3.348476183                             |
| 57.81541704                        | 3.963624386                                 | 0.200895531                               | 8.703183834                       | 5.691403765                             |
| 74.59654675                        | 3.840963549                                 | 0.17261153                                | 6.522406168                       | 6.671696653                             |
| 74.55711426                        | 4.065841827                                 | 0.156912109                               | 8.050193278                       | 6.682272446                             |
| 34.09334587                        | 3.619018239                                 | 0.229810496                               | 8.23303935                        | 4.403048761                             |
| 53.60502873                        | 3.894796999                                 | 0.218841184                               | 8.504875999                       | 5.323349365                             |
| 38.92099059                        | 3.73261538                                  | 0.221895439                               | 8.298975896                       | 4.69293976                              |
| 37.16245045                        | 3.600852039                                 | 0.212179731                               | 8.05322295                        | 4.718994166                             |
| 48.83656766                        | 3.842175757                                 | 0.212862544                               | 8.348168283                       | 5.288125505                             |
| 39.60091869                        | 3.667126411                                 | 0.257734555                               | 8.066053398                       | 4.485097974                             |
| 42.34043861                        | 3.761041407                                 | 0.20735621                                | 8.27199752                        | 4.960761102                             |
| 45.91394941                        | 3.80535963                                  | 0.202526616                               | 8.434913819                       | 5.161479742                             |
| 54.86503921                        | 3.919979265                                 | 0.197215743                               | 8.511525033                       | 5.539854839                             |
| 45.47615275                        | 3.827298038                                 | 0.191867043                               | 8.523856063                       | 5.229555346                             |
| 23.9190613                         | 3.360458717                                 | 0.279517667                               | 7.512452931                       | 3.565176789                             |
| 56.90889008                        | 3.973348854                                 | 0.198724018                               | 8.869939546                       | 5.622323142                             |
| 42.50299542                        | 3.747456893                                 | 0.19951641                                | 8.070758812                       | 5.059177169                             |
| 55.35917545                        | 3.736439466                                 | 0.21371864                                | 6.678583774                       | 5.546533245                             |
| 53.65610219                        | 3.884791782                                 | 0.189885337                               | 8.046502122                       | 5.630148573                             |
| 36.17051152                        | 3.654169325                                 | 0.241683754                               | 8.236126136                       | 4.415127695                             |
| 47.02303267                        | 3.792561856                                 | 0.210853503                               | 8.110447615                       | 5.182240054                             |
| 41.87011942                        | 3.714482434                                 | 0.247550656                               | 8.399557345                       | 4.666897756                             |
| 28.39017926                        | 3.490581237                                 | 0.240740884                               | 7.761717261                       | 4.089422056                             |
| 30.14608393                        | 3.385257408                                 | 0.30355856                                | 7.641874958                       | 3.620450003                             |
| 78.87569758                        | 4.178824414                                 | 0.156551975                               | 8.817489952                       | 6.901030964                             |
| 74.83701346                        | 4.115273864                                 | 0.172978219                               | 9.032069128                       | 6.604469577                             |
| 64.07685666                        | 4.013899979                                 | 0.181533207                               | 8.602237036                       | 6.046593411                             |
| 41.49427911                        | 3.731842013                                 | 0.22442246                                | 8.010327707                       | 4.698584081                             |
| 24.27264158                        | 3.344176436                                 | 0.256580111                               | 7.54773976                        | 3.684965426                             |
| 43.59541653                        | 3.785974798                                 | 0.212856979                               | 8.416172328                       | 4.9853297                               |
| 50.60899234                        | 3.856272048                                 | 0.226067736                               | 8.675536935                       | 5.094111512                             |
| 24.92404714                        | 3.362408294                                 | 0.290482338                               | 7.605413723                       | 3.519359077                             |
| 26.01231453                        | 3.257091028                                 | 0.313627989                               | 7.245127987                       | 3.27213623                              |
| 33.42102719                        | 3.540521286                                 | 0.213650467                               | 7.292497126                       | 4.428629939                             |
| 58.05661534                        | 3.949131144                                 | 0.206119212                               | 8.609548382                       | 5.644693587                             |
| 63.6586037                         | 3.988162725                                 | 0.175680571                               | 8.088505199                       | 6.152163448                             |
| 45.08401131                        | 3.797596734                                 | 0.221338997                               | 8.519012602                       | 5.009033138                             |
| 40.69903257                        | 3.718926156                                 | 0.198057858                               | 7.928297709                       | 4.96661711                              |
| 56.12529436                        | 3.940613944                                 | 0.206769164                               | 8.622923023                       | 5.598106996                             |
| 42.76072899                        | 3.745876486                                 | 0.225008135                               | 8.35737314                        | 4.855874064                             |
| 37.31245399                        | 3.670009774                                 | 0.228470462                               | 8.186074506                       | 4.587548509                             |
| 33.520359                          | 3.564050218                                 | 0.264510947                               | 8.00281021                        | 4.069491342                             |
| 27.91767912                        | 3.442622324                                 | 0.286072206                               | 7.744623009                       | 3.698791052                             |
| 36.75804513                        | 3.593639621                                 | 0.279660958                               | 8.110629139                       | 4.152417382                             |
| 17.16763178                        | 4.119072141                                 | 0.161446338                               | 8.820704904                       | 6.620296835                             |
| 44.99954423                        | 3.788668465                                 | 0.207163151                               | 8.346374614                       | 5.084632615                             |
| 45.14714053                        | 3.788040033                                 | 0.204318392                               | 8.030329172                       | 5.13344824                              |
| 45.37116862                        | 3.797012527                                 | 0.204996318                               | 8.492921572                       | 5.135142283                             |
| 48.44558618                        | 3.847401483                                 | 0.217519845                               | 8.462110923                       | 5.206388916                             |
| 69.74955263                        | 4.062858062                                 | 0.159961819                               | 8.305746715                       | 6.509838432                             |
| 91.14860663                        | 4.290865848                                 | 0.143092451                               | 9.131806525                       | 7.400068087                             |
| 74.25274108                        | 4.134112485                                 | 0.189626963                               | 9.008245273                       | 6.363614338                             |
| 47.61406787                        | 3.651711939                                 | 0.192905244                               | 6.95350123                        | 5.278212401                             |
| 30.70122441                        | 3.54223494                                  | 0.249186943                               | 8.080834027                       | 4.122701176                             |
| 27.73719377                        | 3.428738104                                 | 0.290142063                               | 7.727954653                       | 3.640796207                             |
| 37.90319366                        | 3.683650441                                 | 0.217232595                               | 8.062667958                       | 4.717202825                             |
| 57.32286111                        | 3.960023434                                 | 0.176336835                               | 8.626130764                       | 5.919085705                             |
| 28.10675858                        | 3.2444418                                   | 0.237326833                               | 6.867210965                       | 4.069658854                             |
| 71.09365146                        | 3.811157242                                 | 0.195218268                               | 6.382062943                       | 6.46415953                              |
| 46.24519488                        | 3.758475086                                 | 0.2535234                                 | 8.361588616                       | 4.788507778                             |
| 75.86348583                        | 4.123590226                                 | 0.172737432                               | 8.428382648                       | 5.60417929                              |
| 47.16232938                        | 3.785342912                                 | 0.236923221                               | 7.977559195                       | 4.877430284                             |
| 36.51392605                        | 3.64713323                                  | 0.248380888                               | 8.148012457                       | 4.378259987                             |
| 29.42423552                        | 3.511329942                                 | 0.263397911                               | 7.94430779                        | 3.935111109                             |
| 111.6216892                        | 4.292793536                                 | 0.140816371                               | 7.890627622                       | 8.061118738                             |
| 40.00992546                        | 3.716904837                                 | 0.222176309                               | 8.155591169                       | 4.74497899                              |
| 62.28148585                        | 3.841913071                                 | 0.169242437                               | 6.91810587                        | 6.198198177                             |
| 25.03439889                        | 3.387328254                                 | 0.242569107                               | 7.542198182                       | 3.902875308                             |
| 54.98569712                        | 3.823293928                                 | 0.237871866                               | 7.948073196                       | 5.151603876                             |



| log.sigma.2.0.mm.3D_glmc_DifferenceVariance | log.sigma.2.0.mm.3D_glmc_ldn | log.sigma.2.0.mm.3D_glmc_ldm | log.sigma.2.0.mm.3D_glmc_Correlation | log.sigma.2.0.mm.3D_glmc_Autocorrelation |
|---------------------------------------------|------------------------------|------------------------------|--------------------------------------|------------------------------------------|
| 21.83866354                                 | 0.872625575                  | 0.187325962                  | 0.15591269                           | 226.4356859                              |
| 18.2381328                                  | 0.901325665                  | 0.311716757                  | 0.191513645                          | 263.3214517                              |
| 24.02453199                                 | 0.873569822                  | 0.19716407                   | 0.127753922                          | 167.4366115                              |
| 29.9325774                                  | 0.879572456                  | 0.178943852                  | 0.167884838                          | 443.8869451                              |
| 14.47104668                                 | 0.882441251                  | 0.198947192                  | 0.321224935                          | 303.326792                               |
| 12.24316919                                 | 0.854704717                  | 0.220445807                  | 0.209257812                          | 130.4234076                              |
| 13.46272911                                 | 0.878579529                  | 0.245312625                  | 0.116678972                          | 323.890291                               |
| 25.4661079                                  | 0.848471474                  | 0.174569293                  | 0.215084885                          | 229.1171593                              |
| 21.17122082                                 | 0.874847223                  | 0.188025679                  | 0.227778958                          | 286.5238537                              |
| 16.81800926                                 | 0.905993242                  | 0.243634094                  | 0.155459465                          | 318.2245083                              |
| 13.58053888                                 | 0.847964645                  | 0.214438495                  | 0.185009697                          | 157.9438121                              |
| 21.77954841                                 | 0.896203818                  | 0.216135212                  | 0.138351721                          | 361.8705875                              |
| 11.36000843                                 | 0.891001924                  | 0.231062832                  | 0.273361062                          | 164.1365363                              |
| 12.03883999                                 | 0.871859977                  | 0.232937446                  | 0.29410881                           | 136.4467695                              |
| 16.96045632                                 | 0.87478776                   | 0.180887293                  | 0.126646209                          | 290.574297                               |
| 13.05910162                                 | 0.939108325                  | 0.420564417                  | 0.192950133                          | 245.1412841                              |
| 15.03697323                                 | 0.864848717                  | 0.205995905                  | 0.279453825                          | 165.1511912                              |
| 14.00040027                                 | 0.88424085                   | 0.255916879                  | 0.320068523                          | 154.3040297                              |
| 20.27265131                                 | 0.862249834                  | 0.182492861                  | 0.266845369                          | 279.7252055                              |
| 10.7340357                                  | 0.905494416                  | 0.347714813                  | 0.255400122                          | 205.2281281                              |
| 14.65076952                                 | 0.905068176                  | 0.290138917                  | 0.11940146                           | 252.9672535                              |
| 16.37304103                                 | 0.873286149                  | 0.195630928                  | 0.246598077                          | 191.4045952                              |
| 12.61653586                                 | 0.886966632                  | 0.260750985                  | 0.263608749                          | 170.4458111                              |
| 23.05096279                                 | 0.861450076                  | 0.163019814                  | 0.123983057                          | 385.5740028                              |
| 16.44680918                                 | 0.904904328                  | 0.259107778                  | 0.111567586                          | 181.9612528                              |
| 24.85951965                                 | 0.884286697                  | 0.222693026                  | 0.124157034                          | 333.5213498                              |
| 13.12431747                                 | 0.918031354                  | 0.31969207                   | 0.148753081                          | 336.7293276                              |
| 20.22703268                                 | 0.88845532                   | 0.234913267                  | 0.132953919                          | 211.8180972                              |
| 24.61857362                                 | 0.857141241                  | 0.188041836                  | 0.195446416                          | 292.2527795                              |
| 17.27296762                                 | 0.910520538                  | 0.317931988                  | 0.192817051                          | 187.7143646                              |
| 15.59991711                                 | 0.903789568                  | 0.248701425                  | 0.122653538                          | 244.5987933                              |
| 9.56497988                                  | 0.904132214                  | 0.30159711                   | 0.334118471                          | 138.7087265                              |
| 24.84726318                                 | 0.882808466                  | 0.196214326                  | 0.162011194                          | 344.7682767                              |
| 28.64550639                                 | 0.842891751                  | 0.159750816                  | 0.160517135                          | 317.8837596                              |
| 28.26786988                                 | 0.834348225                  | 0.151837421                  | 0.136209037                          | 261.5447766                              |
| 14.326529                                   | 0.878521585                  | 0.224530647                  | 0.278980234                          | 234.8282004                              |
| 24.65624795                                 | 0.885344131                  | 0.228311046                  | 0.154608745                          | 202.2227275                              |
| 16.64922387                                 | 0.887788498                  | 0.227849284                  | 0.123176875                          | 345.4029548                              |
| 13.28005966                                 | 0.86685539                   | 0.211433154                  | 0.22918569                           | 220.9609216                              |
| 20.3976532                                  | 0.873167522                  | 0.205281862                  | 0.164935841                          | 256.1215617                              |
| 19.08774075                                 | 0.891132811                  | 0.256524223                  | 0.123259989                          | 298.1072314                              |
| 17.26715238                                 | 0.872805202                  | 0.202748651                  | 0.270152809                          | 224.9720061                              |
| 18.28240963                                 | 0.861732519                  | 0.203922536                  | 0.23024584                           | 225.272555                               |
| 23.26784224                                 | 0.868733698                  | 0.195939279                  | 0.214292619                          | 233.0757716                              |
| 17.64491345                                 | 0.859246463                  | 0.187275508                  | 0.178664758                          | 233.0085155                              |
| 10.91630585                                 | 0.892869492                  | 0.287225508                  | 0.185401484                          | 98.9958938                               |
| 24.8246627                                  | 0.894978067                  | 0.196095394                  | 0.150700873                          | 566.6084616                              |
| 16.45840715                                 | 0.850562271                  | 0.189326977                  | 0.205890943                          | 157.182704                               |
| 23.27745888                                 | 0.86236017                   | 0.206027527                  | 0.233032498                          | 281.6354204                              |
| 21.16973473                                 | 0.871922061                  | 0.177707482                  | 0.200969025                          | 272.4921866                              |
| 16.28879182                                 | 0.88871281                   | 0.249095645                  | 0.182883882                          | 236.2033437                              |
| 19.22311129                                 | 0.844940565                  | 0.206564201                  | 0.21259553                           | 175.3095275                              |
| 19.49141413                                 | 0.907540544                  | 0.24851396                   | 0.222082686                          | 490.3511883                              |
| 11.46113471                                 | 0.87429522                   | 0.232680728                  | 0.235101867                          | 153.5842656                              |
| 16.37805309                                 | 0.915291722                  | 0.34764997                   | 0.211472395                          | 241.8803806                              |
| 30.47540827                                 | 0.855426517                  | 0.149763891                  | 0.125332547                          | 316.6456581                              |
| 28.81914283                                 | 0.883563805                  | 0.165716576                  | 0.199901359                          | 477.8810522                              |
| 26.0375726                                  | 0.865194607                  | 0.174322051                  | 0.153125515                          | 370.3421566                              |
| 19.07589685                                 | 0.888786464                  | 0.240665339                  | 0.160743345                          | 247.9164141                              |
| 10.47031377                                 | 0.910483749                  | 0.248169779                  | 0.23432852                           | 524.4271627                              |
| 18.31243784                                 | 0.872750382                  | 0.206612372                  | 0.230864339                          | 223.248467                               |
| 24.05410863                                 | 0.900644929                  | 0.23436191                   | 0.222543985                          | 427.0583761                              |
| 12.15746688                                 | 0.908906525                  | 0.311514249                  | 0.181065409                          | 283.8474443                              |
| 14.94201798                                 | 0.939892414                  | 0.373987337                  | 0.184923057                          | 1236.024044                              |
| 13.52272132                                 | 0.852495396                  | 0.219460201                  | 0.265169575                          | 130.2617327                              |
| 25.41053167                                 | 0.878879198                  | 0.199999511                  | 0.151920521                          | 238.0053767                              |
| 24.84082706                                 | 0.840717579                  | 0.168932588                  | 0.137239886                          | 205.7962625                              |
| 19.48842124                                 | 0.896767687                  | 0.218008935                  | 0.241431202                          | 403.9068297                              |
| 15.6969911                                  | 0.852410204                  | 0.188402301                  | 0.225105008                          | 197.543151                               |
| 24.06939217                                 | 0.876705501                  | 0.203192359                  | 0.147353531                          | 269.1071418                              |
| 18.23671654                                 | 0.887759476                  | 0.221519968                  | 0.191804612                          | 364.9499967                              |
| 15.86886147                                 | 0.874692858                  | 0.224915034                  | 0.273454326                          | 185.3768691                              |
| 16.50139949                                 | 0.899956671                  | 0.288303275                  | 0.17233622                           | 264.1244089                              |
| 13.96932528                                 | 0.909941179                  | 0.306550055                  | 0.175300181                          | 255.4345982                              |
| 19.24214609                                 | 0.917388821                  | 0.288512912                  | 0.176753663                          | 485.0781762                              |
| 27.01707035                                 | 0.84680928                   | 0.156602721                  | 0.142211108                          | 314.9129519                              |
| 18.49791463                                 | 0.873843153                  | 0.206032425                  | 0.199125037                          | 187.0577154                              |
| 18.25084212                                 | 0.854161288                  | 0.199306254                  | 0.202871457                          | 171.5645542                              |
| 18.10968107                                 | 0.862216475                  | 0.20181496                   | 0.227859119                          | 205.9828093                              |
| 20.83735545                                 | 0.891086453                  | 0.215065114                  | 0.139792987                          | 254.9369505                              |
| 26.3465865                                  | 0.852201921                  | 0.152664633                  | 0.14735125                           | 268.8585393                              |
| 35.46719353                                 | 0.861831703                  | 0.140533456                  | 0.171531857                          | 492.8899173                              |
| 32.76881612                                 | 0.902156341                  | 0.19012894                   | 0.128737108                          | 1166.425408                              |
| 18.78295286                                 | 0.855073052                  | 0.191922035                  | 0.303823265                          | 244.0670456                              |
| 13.27483991                                 | 0.882073388                  | 0.24692238                   | 0.247533268                          | 184.6906451                              |
| 14.24550189                                 | 0.934020086                  | 0.304483273                  | 0.1947331                            | 514.5023191                              |
| 15.31111667                                 | 0.863334888                  | 0.208692787                  | 0.268942803                          | 158.4386943                              |
| 21.33004918                                 | 0.856121532                  | 0.172336145                  | 0.225553515                          | 348.6546458                              |
| 9.436488273                                 | 0.857076719                  | 0.238689655                  | 0.170002869                          | 184.4810243                              |
| 27.58248063                                 | 0.805031503                  | 0.180088459                  | 0.087667482                          | 232.5259553                              |
| 22.7247126                                  | 0.911432402                  | 0.257408618                  | 0.166919056                          | 801.4706968                              |
| 32.01961116                                 | 0.873313391                  | 0.162733022                  | 0.110550361                          | 349.9927983                              |
| 22.91171735                                 | 0.883830224                  | 0.261802237                  | 0.074856514                          | 363.8427547                              |
| 16.89981995                                 | 0.902335635                  | 0.253792377                  | 0.1232467                            | 294.3790328                              |
| 13.68960438                                 | 0.90408677                   | 0.271056632                  | 0.169541242                          | 267.4136431                              |
| 44.11286254                                 | 0.855916059                  | 0.13849825                   | 0.19800674                           | 539.9835327                              |
| 17.17797924                                 | 0.88393814                   | 0.216458607                  | 0.171967853                          | 365.4483327                              |
| 22.44020713                                 | 0.834261072                  | 0.160201736                  | 0.238876125                          | 227.2271748                              |
| 9.540576616                                 | 0.874336344                  | 0.229977363                  | 0.331639258                          | 168.7235942                              |
| 27.91183297                                 | 0.89664148                   | 0.23494947                   | 0.136798278                          | 309.1160467                              |

| log.sigma.2.0.mm.3D_glcm_SumEntropy | log.sigma.2.0.mm.3D_glcm_AverageIntensity | log.sigma.2.0.mm.3D_glcm_Energy | log.sigma.2.0.mm.3D_glcm_SumSquares | log.sigma.2.0.mm.3D_glcm_ClusterProminence |
|-------------------------------------|-------------------------------------------|---------------------------------|-------------------------------------|--------------------------------------------|
| 5.038948773                         | 15.24473231                               | 0.0039695                       | 33.06018933                         | 14981.32227                                |
| 4.775697405                         | 16.36616177                               | 0.009968492                     | 22.3821783                          | 9225.323071                                |
| 4.916584704                         | 13.09560226                               | 0.005894361                     | 34.12489915                         | 18329.701                                  |
| 5.311783318                         | 21.32542477                               | 0.002459264                     | 41.6934176                          | 26931.42065                                |
| 4.96015512                          | 17.37126837                               | 0.0060564                       | 28.08013756                         | 17145.45736                                |
| 4.737642662                         | 11.23768457                               | 0.005623737                     | 19.74287441                         | 5533.011766                                |
| 4.479942461                         | 17.98104097                               | 0.010029017                     | 17.61615733                         | 5620.687647                                |
| 5.253099026                         | 15.10176183                               | 0.003096205                     | 42.27381648                         | 22001.02995                                |
| 5.181197071                         | 17.0399949                                | 0.002937736                     | 33.73340842                         | 19022.76011                                |
| 4.773195726                         | 18.05771917                               | 0.006194081                     | 21.63148159                         | 9681.554377                                |
| 4.790900221                         | 12.40764986                               | 0.004974251                     | 21.59353699                         | 6325.758998                                |
| 4.943706606                         | 19.28524099                               | 0.004689485                     | 27.79160768                         | 13521.69595                                |
| 4.811992279                         | 12.62835564                               | 0.004912345                     | 19.99233933                         | 8243.917491                                |
| 4.848074984                         | 11.411088                                 | 0.005071234                     | 21.3444875                          | 7664.678144                                |
| 4.887056125                         | 17.29248637                               | 0.004249951                     | 25.46052458                         | 8973.936534                                |
| 4.249237574                         | 15.75148621                               | 0.032475994                     | 13.40481143                         | 6059.871708                                |
| 4.97241549                          | 12.57243546                               | 0.004492111                     | 27.45633037                         | 11174.16719                                |
| 4.912074468                         | 12.16266745                               | 0.005079288                     | 23.38373377                         | 11186.77129                                |
| 5.143362123                         | 16.72613956                               | 0.003982751                     | 35.63985023                         | 18692.37337                                |
| 4.54779801                          | 14.22297872                               | 0.011106334                     | 14.26510471                         | 4149.564065                                |
| 4.609862051                         | 16.05218855                               | 0.009538953                     | 17.93058206                         | 5453.742516                                |
| 5.013655828                         | 13.72141918                               | 0.003795786                     | 28.36545137                         | 14731.96397                                |
| 4.768612205                         | 12.88142877                               | 0.006420058                     | 19.66291121                         | 7633.288235                                |
| 5.03636783                          | 19.95196297                               | 0.004594609                     | 33.11280578                         | 18342.59831                                |
| 4.642577302                         | 13.59369605                               | 0.00766456                      | 20.42757878                         | 7172.938653                                |
| 4.952149684                         | 18.51626024                               | 0.0051515                       | 30.68974565                         | 16250.53511                                |
| 4.47139112                          | 18.51296173                               | 0.01191343                      | 15.08264643                         | 5957.998561                                |
| 4.825777497                         | 14.70955093                               | 0.006321952                     | 26.22578627                         | 11644.41067                                |
| 5.160319968                         | 17.25669431                               | 0.003410248                     | 37.43539187                         | 17606.4824                                 |
| 4.727212356                         | 13.76036399                               | 0.011274581                     | 20.97032242                         | 8870.004339                                |
| 4.684601856                         | 15.82335245                               | 0.006706553                     | 20.17545245                         | 7293.016642                                |
| 4.687852232                         | 11.56164544                               | 0.007896127                     | 16.022119316                        | 5995.57923                                 |
| 5.141812298                         | 18.83765766                               | 0.003118576                     | 34.04857371                         | 17818.64803                                |
| 4.653834915                         | 17.94252699                               | 0.012924702                     | 43.16466299                         | 34694.19407                                |
| 5.139842776                         | 16.35955793                               | 0.004436008                     | 44.11851164                         | 22611.62461                                |
| 4.942403508                         | 15.19816012                               | 0.004092604                     | 24.16159418                         | 8503.441046                                |
| 5.056118087                         | 14.42199169                               | 0.004325858                     | 32.84114946                         | 16698.80349                                |
| 4.829040955                         | 18.84139225                               | 0.004507944                     | 22.15588189                         | 7612.53537                                 |
| 4.891800077                         | 14.70358159                               | 0.004853331                     | 24.25905416                         | 9896.328441                                |
| 5.008519794                         | 16.19395935                               | 0.003872617                     | 29.95240844                         | 12163.27758                                |
| 4.814883256                         | 17.49976128                               | 0.005762423                     | 23.13573652                         | 8225.938388                                |
| 5.054301948                         | 14.88652802                               | 0.004058589                     | 29.72635143                         | 13258.51245                                |
| 5.043488913                         | 14.88755881                               | 0.003741792                     | 30.52460459                         | 12193.2146                                 |
| 5.15276255                          | 15.28747135                               | 0.003582368                     | 35.58038731                         | 19515.38972                                |
| 5.006134731                         | 15.24004795                               | 0.003384534                     | 28.44771836                         | 10796.37131                                |
| 4.50798449                          | 9.810829751                               | 0.008507926                     | 14.76750951                         | 4093.784048                                |
| 5.147229799                         | 24.01987374                               | 0.003013704                     | 33.8592986                          | 18078.66037                                |
| 4.928485997                         | 12.32828212                               | 0.004468784                     | 27.0188627                          | 10252.59689                                |
| 4.661154962                         | 16.70963449                               | 0.012088245                     | 35.96952491                         | 27539.60181                                |
| 5.036647224                         | 16.6710463                                | 0.005112592                     | 33.20299829                         | 18814.3355                                 |
| 4.85634005                          | 15.43429549                               | 0.00509634                      | 23.01435703                         | 8548.431806                                |
| 4.968846876                         | 12.99493003                               | 0.004583098                     | 29.92831688                         | 10724.98871                                |
| 5.007793705                         | 22.24717617                               | 0.004577295                     | 26.97890302                         | 13322.7653                                 |
| 4.722385043                         | 12.21740637                               | 0.005721256                     | 18.52688171                         | 5635.537801                                |
| 4.676478314                         | 15.67216992                               | 0.013796589                     | 19.47437909                         | 7332.689004                                |
| 5.28382659                          | 18.1582681                                | 0.002716961                     | 44.64031099                         | 26527.95784                                |
| 5.335932617                         | 22.16118704                               | 0.002462097                     | 46.26082501                         | 30674.94515                                |
| 5.143651572                         | 19.5451411                                | 0.003651946                     | 35.60367341                         | 23963.04498                                |
| 4.875031267                         | 15.87143742                               | 0.006450979                     | 25.13921115                         | 9932.656656                                |
| 4.595356949                         | 22.94092893                               | 0.006925544                     | 15.11713888                         | 5178.06719                                 |
| 5.018059784                         | 14.93014154                               | 0.003985532                     | 29.49342643                         | 12814.00085                                |
| 5.135168979                         | 20.80460597                               | 0.003819593                     | 32.16933969                         | 22702.08205                                |
| 4.566453467                         | 16.93129593                               | 0.009421458                     | 15.6438282                          | 4504.319645                                |
| 4.478633287                         | 35.27202544                               | 0.017727533                     | 15.82864229                         | 7429.550751                                |
| 4.758823324                         | 11.14426617                               | 0.007627571                     | 22.7507484                          | 8283.959612                                |
| 5.110717451                         | 15.70510809                               | 0.003775937                     | 34.65029744                         | 21546.16862                                |
| 5.050158727                         | 14.2709023                                | 0.004480217                     | 37.31176376                         | 16822.08462                                |
| 5.073032343                         | 20.26193413                               | 0.003707615                     | 28.93336999                         | 15495.4041                                 |
| 4.89400616                          | 13.86169811                               | 0.004919023                     | 26.46179116                         | 9302.448715                                |
| 5.094080794                         | 16.65944856                               | 0.003456647                     | 33.17855312                         | 16125.67074                                |
| 4.942874858                         | 19.31091627                               | 0.004346798                     | 26.40324585                         | 11333.483                                  |
| 4.969320539                         | 13.39463844                               | 0.004460836                     | 26.09984826                         | 10928.88744                                |
| 4.763603556                         | 16.39190139                               | 0.006883827                     | 21.02472444                         | 7910.006997                                |
| 4.632171523                         | 16.09946702                               | 0.00900636                      | 17.5912107                          | 5514.338932                                |
| 4.804052474                         | 22.16019605                               | 0.008051301                     | 22.37124748                         | 12271.82423                                |
| 5.236987132                         | 18.05455649                               | 0.002730941                     | 41.94714954                         | 22629.74847                                |
| 5.007816873                         | 13.6251123                                | 0.003867052                     | 28.99893722                         | 11497.95156                                |
| 4.92623847                          | 12.90775525                               | 0.004974534                     | 28.82417016                         | 12009.53607                                |
| 5.061306724                         | 14.25457172                               | 0.00361263                      | 30.36231351                         | 13155.52535                                |
| 4.980974537                         | 16.21756589                               | 0.003960977                     | 28.51319472                         | 12147.85974                                |
| 5.179381675                         | 16.57964166                               | 0.003847715                     | 42.2880392                          | 22762.43393                                |
| 5.458148402                         | 22.52521748                               | 0.002198529                     | 53.58484519                         | 38459.10729                                |
| 5.272577892                         | 34.59934179                               | 0.002942362                     | 41.95062808                         | 27541.32754                                |
| 4.797259739                         | 15.38046768                               | 0.009405194                     | 34.51651712                         | 23453.10664                                |
| 4.82324232                          | 13.42268411                               | 0.005115384                     | 20.73499523                         | 7078.583988                                |
| 4.634998743                         | 22.81159039                               | 0.008873992                     | 18.05248639                         | 8516.181427                                |
| 4.920760123                         | 12.3217657                                | 0.004986812                     | 26.24392244                         | 11068.9135                                 |
| 5.191355771                         | 18.83938629                               | 0.003187753                     | 36.73289654                         | 18251.20801                                |
| 4.434794361                         | 13.47116773                               | 0.010423055                     | 16.96789951                         | 4206.638561                                |
| 4.503930171                         | 15.13909605                               | 0.014043017                     | 38.69924692                         | 18005.63674                                |
| 4.949879836                         | 28.5683527                                | 0.006236291                     | 27.29132653                         | 17422.15076                                |
| 5.143413538                         | 19.06057593                               | 0.003811047                     | 43.68994881                         | 31374.4055                                 |
| 4.802531228                         | 19.36250822                               | 0.009166081                     | 25.25556911                         | 10304.21523                                |
| 4.762611936                         | 17.41812497                               | 0.005388894                     | 20.9849489                          | 7952.96227                                 |
| 4.69621032                          | 16.49360701                               | 0.006246885                     | 18.30642582                         | 5354.01053                                 |
| 5.388048347                         | 23.6222495                                | 0.00498648                      | 68.65450747                         | 65897.50155                                |
| 4.868616669                         | 19.35464645                               | 0.004942012                     | 23.40475631                         | 11445.97905                                |
| 4.819942419                         | 14.82365246                               | 0.009131704                     | 40.9667973                          | 25514.96522                                |
| 4.752591594                         | 12.74729179                               | 0.006719127                     | 18.72861005                         | 7096.47551                                 |
| 4.921490315                         | 17.90180536                               | 0.00627165                      | 33.41673228                         | 25019.36759                                |

| log.sigma.2.0.mm.3D_glc_m_SumAverage | log.sigma.2.0.mm.3D_glc_m_Irc2 | log.sigma.2.0.mm.3D_glc_m_Irc1 | log.sigma.2.0.mm.3D_glc_m_DifferenceAverage | log.sigma.2.0.mm.3D_glc_m_Id |
|--------------------------------------|--------------------------------|--------------------------------|---------------------------------------------|------------------------------|
| 29.77248862                          | 0.828891863                    | -0.13134953                    | 5.611667073                                 | 0.275066118                  |
| 32.20651997                          | 0.789784497                    | -0.118422737                   | 4.054008271                                 | 0.384204566                  |
| 25.57128991                          | 0.911397898                    | -0.203542569                   | 5.608159546                                 | 0.282716748                  |
| 41.81333063                          | 0.705937402                    | -0.074220386                   | 6.324163871                                 | 0.264368129                  |
| 34.32376075                          | 0.914507576                    | -0.210766971                   | 4.761799199                                 | 0.290184065                  |
| 22.47536914                          | 0.73952036                     | -0.097183996                   | 4.324788456                                 | 0.310500769                  |
| 35.8907647                           | 0.862800041                    | -0.174782504                   | 4.128440074                                 | 0.331467279                  |
| 29.69450426                          | 0.779929727                    | -0.103298875                   | 6.175410238                                 | 0.26060568                   |
| 33.41278677                          | 0.688931061                    | -0.0723914                     | 5.491397573                                 | 0.276573571                  |
| 35.49656468                          | 0.620835352                    | -0.059638751                   | 4.399257059                                 | 0.327984025                  |
| 24.81529973                          | 0.706434227                    | -0.08455621                    | 4.589270932                                 | 0.303242184                  |
| 37.84611784                          | 0.74920907                     | -0.096129463                   | 5.074433693                                 | 0.301924104                  |
| 25.19912243                          | 0.63270803                     | -0.06497242                    | 4.09887394                                  | 0.320646322                  |
| 22.81745915                          | 0.704751534                    | -0.08740979                    | 4.194952012                                 | 0.321479471                  |
| 33.92164988                          | 0.754000442                    | -0.097062424                   | 5.134062757                                 | 0.273679992                  |
| 31.16096603                          | 0.739382156                    | -0.111440977                   | 2.796943638                                 | 0.478679969                  |
| 25.09977639                          | 0.793273537                    | -0.118402407                   | 4.816382803                                 | 0.29554305                   |
| 24.24340061                          | 0.680130452                    | -0.077816429                   | 4.06043382                                  | 0.340599276                  |
| 32.90044283                          | 0.878203996                    | -0.164920682                   | 5.469406453                                 | 0.272874486                  |
| 28.39804995                          | 0.706558221                    | -0.095187761                   | 3.1343945                                   | 0.419107686                  |
| 31.68527867                          | 0.568851574                    | -0.050358919                   | 3.914798471                                 | 0.368020002                  |
| 27.18488609                          | 0.686456036                    | -0.07550437                    | 4.920351574                                 | 0.287158584                  |
| 25.71467678                          | 0.623711419                    | -0.065854964                   | 3.929409514                                 | 0.344944906                  |
| 39.07503766                          | 0.902123024                    | -0.187391202                   | 6.002958313                                 | 0.253348705                  |
| 26.8235416                           | 0.727517929                    | -0.093897052                   | 4.183319714                                 | 0.341815369                  |
| 36.32637518                          | 0.87218214                     | -0.162623383                   | 5.248712146                                 | 0.3054218                    |
| 36.58240345                          | 0.659070619                    | -0.074320193                   | 3.511691091                                 | 0.3939454                    |
| 28.88780701                          | 0.738952162                    | -0.09460503                    | 4.733611415                                 | 0.319362407                  |
| 33.7836064                           | 0.730509856                    | -0.090644799                   | 5.791917452                                 | 0.274905047                  |
| 27.12620341                          | 0.755896619                    | -0.105178585                   | 3.829765753                                 | 0.390489784                  |
| 31.13292946                          | 0.595451412                    | -0.054996884                   | 4.28334254                                  | 0.333084609                  |
| 23.09928416                          | 0.59483751                     | -0.06068349                    | 3.348476183                                 | 0.381567095                  |
| 36.84866276                          | 0.71089806                     | -0.078675563                   | 5.691403765                                 | 0.281764015                  |
| 35.28196015                          | 0.992532962                    | -0.487798276                   | 6.671696653                                 | 0.245936429                  |
| 32.00177295                          | 0.951948198                    | -0.256903585                   | 6.682272446                                 | 0.240442288                  |
| 30.2158875                           | 0.635275069                    | -0.063036387                   | 4.403048761                                 | 0.313729794                  |
| 28.10840173                          | 0.68855738                     | -0.074865513                   | 5.323349365                                 | 0.309805661                  |
| 37.03063148                          | 0.572891855                    | -0.04788832                    | 4.69293976                                  | 0.313431039                  |
| 29.36135924                          | 0.751575345                    | -0.107361479                   | 4.71899416                                  | 0.300365108                  |
| 31.71630977                          | 0.773428163                    | -0.104069001                   | 5.288125505                                 | 0.290751624                  |
| 34.38006796                          | 0.745046683                    | -0.096791455                   | 4.485097974                                 | 0.337028914                  |
| 29.47600905                          | 0.770584111                    | -0.103757649                   | 4.960761102                                 | 0.29216648                   |
| 29.55900151                          | 0.695644598                    | -0.076976265                   | 5.161479742                                 | 0.291534432                  |
| 30.05017052                          | 0.819631911                    | -0.12401603                    | 5.539854839                                 | 0.282973629                  |
| 30.21083429                          | 0.639770181                    | -0.060769601                   | 5.229555346                                 | 0.27791703                   |
| 19.61802745                          | 0.617935025                    | -0.064285246                   | 3.565176789                                 | 0.368546389                  |
| 47.40198872                          | 0.614287837                    | -0.053422066                   | 5.622323142                                 | 0.28238368                   |
| 24.62306317                          | 0.802653541                    | -0.121309326                   | 5.059177169                                 | 0.280793904                  |
| 33.08634644                          | 0.981028184                    | -0.395373263                   | 5.546533245                                 | 0.289509336                  |
| 32.624831                            | 0.88672256                     | -0.174829936                   | 5.630148573                                 | 0.267252419                  |
| 30.47868748                          | 0.621484087                    | -0.060069101                   | 4.415127695                                 | 0.332182177                  |
| 25.98986006                          | 0.754010569                    | -0.101256119                   | 5.182240054                                 | 0.293236476                  |
| 44.01838773                          | 0.691629139                    | -0.077899743                   | 4.666897756                                 | 0.32947665                   |
| 24.43379116                          | 0.762553238                    | -0.106794262                   | 4.089422026                                 | 0.321903211                  |
| 30.86557982                          | 0.764778945                    | -0.111714229                   | 3.620450003                                 | 0.414905525                  |
| 35.29564164                          | 0.843070216                    | -0.131530202                   | 6.901030964                                 | 0.236884781                  |
| 43.31376712                          | 0.74654486                     | -0.089736088                   | 6.604469577                                 | 0.251359177                  |
| 38.21657086                          | 0.769438456                    | -0.099355793                   | 6.046593411                                 | 0.262474033                  |
| 31.24502011                          | 0.823414946                    | -0.132939669                   | 4.698584081                                 | 0.324527409                  |
| 45.63788021                          | 0.715291289                    | -0.092082134                   | 3.684965546                                 | 0.338356573                  |
| 29.44732948                          | 0.661055016                    | -0.067399367                   | 4.9853297                                   | 0.294942301                  |
| 40.99140998                          | 0.677669471                    | -0.071508606                   | 5.094111512                                 | 0.316360492                  |
| 33.53940963                          | 0.668914352                    | -0.078343934                   | 3.519359077                                 | 0.387491204                  |
| 70.23110641                          | 0.788015839                    | -0.127868982                   | 3.27213623                                  | 0.438741501                  |
| 22.28853234                          | 0.938156906                    | -0.254325027                   | 4.428629939                                 | 0.310429515                  |
| 30.54105752                          | 0.778632571                    | -0.103060823                   | 5.644693587                                 | 0.284979882                  |
| 28.34484918                          | 0.914181236                    | -0.20104009                    | 6.152163448                                 | 0.256768324                  |
| 39.8424429                           | 0.667606465                    | -0.069432971                   | 5.009033138                                 | 0.303320196                  |
| 27.684102                            | 0.853806959                    | -0.152491174                   | 4.96661711                                  | 0.280866833                  |
| 32.53148879                          | 0.7099448                      | -0.079331908                   | 5.598106996                                 | 0.287316946                  |
| 37.95161598                          | 0.635551336                    | -0.061940964                   | 4.855874066                                 | 0.307422895                  |
| 26.70875429                          | 0.734918281                    | -0.091958988                   | 4.587548509                                 | 0.312181238                  |
| 32.29882716                          | 0.653747621                    | -0.070530203                   | 4.069491342                                 | 0.365798307                  |
| 31.7840486                           | 0.619869812                    | -0.06292168                    | 3.698791052                                 | 0.38214917                   |
| 43.87382117                          | 0.629993992                    | -0.062351276                   | 4.152417382                                 | 0.364664871                  |
| 35.16982263                          | 0.789092776                    | -0.105401648                   | 6.620296835                                 | 0.243735092                  |
| 26.94790648                          | 0.744292994                    | -0.093219969                   | 5.084632615                                 | 0.293708518                  |
| 25.74760251                          | 0.805834969                    | -0.123422529                   | 5.13344824                                  | 0.287942621                  |
| 28.23623062                          | 0.670697008                    | -0.07243474                    | 5.135142283                                 | 0.289906619                  |
| 31.69930391                          | 0.625417916                    | -0.058594688                   | 5.206388916                                 | 0.299194379                  |
| 32.42686407                          | 0.901145724                    | -0.182536302                   | 6.509838432                                 | 0.241850692                  |
| 43.99415646                          | 0.811299104                    | -0.111520328                   | 7.400068087                                 | 0.227010465                  |
| 68.15875806                          | 0.737071519                    | -0.085092839                   | 6.363614338                                 | 0.272740995                  |
| 30.59117159                          | 0.984430202                    | -0.401089496                   | 5.278212401                                 | 0.282009236                  |
| 26.79981041                          | 0.595009537                    | -0.056287061                   | 4.122701176                                 | 0.332825505                  |
| 45.2219351                           | 0.61524167                     | -0.061874908                   | 3.640796207                                 | 0.381135445                  |
| 24.60754461                          | 0.788915891                    | -0.114580408                   | 4.717202825                                 | 0.298263284                  |
| 36.91034885                          | 0.686439115                    | -0.072414677                   | 5.919085705                                 | 0.260657539                  |
| 26.94233546                          | 0.937687737                    | -0.272397131                   | 4.069658854                                 | 0.327157366                  |
| 30.27819211                          | 0.979224097                    | -0.411369269                   | 6.46415953                                  | 0.261567347                  |
| 56.46029737                          | 0.724398058                    | -0.086968878                   | 4.788507778                                 | 0.335440095                  |
| 37.16995306                          | 0.882750146                    | -0.164469519                   | 6.560417929                                 | 0.250142553                  |
| 38.05908646                          | 0.832435802                    | -0.139063343                   | 4.877430284                                 | 0.33903917                   |
| 34.1738657                           | 0.622095587                    | -0.060171927                   | 4.378259987                                 | 0.336163459                  |
| 32.52739579                          | 0.563637183                    | -0.049188665                   | 3.935111109                                 | 0.353133401                  |
| 45.90374221                          | 0.985955878                    | -0.370095259                   | 8.061118738                                 | 0.222890824                  |
| 38.02726457                          | 0.734097535                    | -0.091040043                   | 4.74497899                                  | 0.30427915                   |
| 29.51753589                          | 0.99038985                     | -0.446846878                   | 6.198198177                                 | 0.249012259                  |
| 25.49458359                          | 0.862901688                    | -0.167262655                   | 3.902875308                                 | 0.321547986                  |
| 34.93114237                          | 0.86604133                     | -0.159768774                   | 5.151603876                                 | 0.317236192                  |

| log.sigma.2.0.mm.3D_glcm_ClusterTendency | log.sigma.2.0.mm.3D_firstorder_InterquartileRange | log.sigma.2.0.mm.3D_firstorder_Skewness | log.sigma.2.0.mm.3D_firstorder_Uniformity |
|------------------------------------------|---------------------------------------------------|-----------------------------------------|-------------------------------------------|
| 73.2587982                               | 202.2702713                                       | 0.33397051                              | 0.050995514                               |
| 51.21211361                              | 126.3041267                                       | 0.391201714                             | 0.074968086                               |
| 71.78838414                              | 190.3970604                                       | 0.780551089                             | 0.058941579                               |
| 97.82493709                              | 221.144783                                        | 0.090629275                             | 0.044974634                               |
| 72.86740391                              | 158.7627754                                       | -0.121083926                            | 0.060435596                               |
| 47.73627399                              | 177.1343651                                       | 0.076037032                             | 0.064393086                               |
| 38.45891349                              | 101.67202                                         | -1.050951276                            | 0.096020921                               |
| 98.93551563                              | 253.2533302                                       | -0.009094242                            | 0.047434074                               |
| 81.48743945                              | 212.1145744                                       | 0.070664226                             | 0.047460334                               |
| 49.33815759                              | 148.1534328                                       | 0.546779001                             | 0.067733989                               |
| 51.11966421                              | 180.6201363                                       | -0.284403838                            | 0.063741997                               |
| 63.20996471                              | 171.4369888                                       | 0.417703033                             | 0.056846804                               |
| 50.13982525                              | 161.2699947                                       | 0.235190211                             | 0.064297464                               |
| 55.16102058                              | 178.9640522                                       | 0.124089593                             | 0.062298188                               |
| 55.34816569                              | 159.9250374                                       | -0.103301038                            | 0.059467106                               |
| 30.64372857                              | 50.28318787                                       | 0.908361276                             | 0.148961966                               |
| 69.51961689                              | 211.4607391                                       | -0.08955235                             | 0.057056182                               |
| 60.42324771                              | 170.4899273                                       | 0.481981439                             | 0.060601402                               |
| 87.39308512                              | 228.5152283                                       | -0.158535892                            | 0.049916746                               |
| 35.2826925                               | 116.1472206                                       | 0.335336098                             | 0.084129055                               |
| 38.07573007                              | 112.2909575                                       | 0.574499641                             | 0.083568681                               |
| 67.73124953                              | 179.7318058                                       | 0.418698088                             | 0.055571255                               |
| 48.96802685                              | 150.9925537                                       | 0.450920308                             | 0.070146377                               |
| 75.11079648                              | 185.405304                                        | -0.359631961                            | 0.056496125                               |
| 42.61555715                              | 130.4385138                                       | 0.788456651                             | 0.074423847                               |
| 67.44969109                              | 192.3943634                                       | 0.310773119                             | 0.054161234                               |
| 34.27284774                              | 96.78810692                                       | 0.607762842                             | 0.09060217                                |
| 55.7708234                               | 142.8509674                                       | 0.70634291                              | 0.067051248                               |
| 87.15879806                              | 245.7219162                                       | -0.176847394                            | 0.04893226                                |
| 47.23806646                              | 113.7791243                                       | 0.594071745                             | 0.080060801                               |
| 43.38743864                              | 133.7858734                                       | 0.669885175                             | 0.074163265                               |
| 42.32377514                              | 127.3602619                                       | 0.519820157                             | 0.078464662                               |
| 79.03440269                              | 220.2710037                                       | 0.148756002                             | 0.049213312                               |
| 100.299151                               | 131.2790709                                       | -0.747144524                            | 0.07137574                                |
| 96.29707882                              | 243.177948                                        | -0.249811974                            | 0.045162578                               |
| 60.37665972                              | 192.1306362                                       | -0.056413759                            | 0.05831095                                |
| 72.39481285                              | 192.6683617                                       | 0.577408729                             | 0.055624035                               |
| 49.25108755                              | 164.9026184                                       | 0.092492682                             | 0.06087659                                |
| 58.79789021                              | 159.0620575                                       | -0.36889135                             | 0.063275126                               |
| 67.36106515                              | 207.0378342                                       | 0.122364822                             | 0.052763493                               |
| 49.99898758                              | 146.8139553                                       | 0.222302743                             | 0.063267602                               |
| 73.34065738                              | 205.4348297                                       | 0.000697069                             | 0.055611649                               |
| 73.19670597                              | 216.8971882                                       | -0.1572616                              | 0.055988434                               |
| 84.00761902                              | 214.980545                                        | 0.03886471                              | 0.049872219                               |
| 64.79842014                              | 200.4534817                                       | -0.146798197                            | 0.054357898                               |
| 35.01117371                              | 138.6187601                                       | 0.529266286                             | 0.075978085                               |
| 76.37542982                              | 187.9872532                                       | 0.125635309                             | 0.050633461                               |
| 64.80806882                              | 207.2311134                                       | 0.087672859                             | 0.055150358                               |
| 86.43543871                              | 99.91311884                                       | -1.124758236                            | 0.087770105                               |
| 79.05376286                              | 173.2987595                                       | -0.250997878                            | 0.05992899                                |
| 52.02562831                              | 150.8799992                                       | 0.34512313                              | 0.064094026                               |
| 72.69023486                              | 232.1768684                                       | -0.19728717                             | 0.057858345                               |
| 65.63223781                              | 174.5020599                                       | 0.291206029                             | 0.05711073                                |
| 45.67215158                              | 154.912365                                        | 0.049712751                             | 0.065657737                               |
| 44.96650885                              | 91.55189896                                       | 0.487891298                             | 0.096209126                               |
| 99.6236853                               | 247.842392                                        | 0.058674863                             | 0.042639466                               |
| 110.0027207                              | 262.6930466                                       | -0.022318195                            | 0.042719144                               |
| 84.77799289                              | 174.5838165                                       | -0.70588919                             | 0.056865782                               |
| 56.85027076                              | 165.8902378                                       | -0.031109046                            | 0.061892918                               |
| 39.11383877                              | 143.5959396                                       | -0.309274979                            | 0.072849576                               |
| 69.4121304                               | 205.5681343                                       | 0.278028824                             | 0.05520537                                |
| 78.52917494                              | 187.1721439                                       | 0.468495096                             | 0.05385357                                |
| 35.38296488                              | 109.4207735                                       | 0.269843261                             | 0.086052723                               |
| 37.68449854                              | 90.79669952                                       | -0.414831642                            | 0.097227125                               |
| 57.58196643                              | 170.2752838                                       | -0.077482052                            | 0.061861581                               |
| 77.25551397                              | 169.6826172                                       | 0.314644388                             | 0.055239449                               |
| 83.124249                                | 226.6601009                                       | -0.359077255                            | 0.053299492                               |
| 73.26638183                              | 208.961647                                        | 0.184955459                             | 0.05214822                                |
| 64.38851575                              | 209.785017                                        | -0.167442988                            | 0.056858171                               |
| 74.24108143                              | 205.3849754                                       | 0.266503359                             | 0.051774168                               |
| 62.19197699                              | 191.2397614                                       | 0.40850053                              | 0.057590244                               |
| 65.39603312                              | 200.317627                                        | 0.091506406                             | 0.057381647                               |
| 46.78757994                              | 132.6163359                                       | 0.578610997                             | 0.07069418                                |
| 39.42692823                              | 112.6358328                                       | 0.49764829                              | 0.082229471                               |
| 52.14955467                              | 110.23806                                         | 0.419554031                             | 0.077493034                               |
| 94.77881388                              | 251.7048855                                       | -0.194770606                            | 0.044521846                               |
| 66.97411334                              | 203.739769                                        | 0.019003908                             | 0.054721168                               |
| 68.36664994                              | 224.0508862                                       | 0.285388345                             | 0.05628057                                |
| 71.96388857                              | 214.1604481                                       | 0.09183053                              | 0.05279886                                |
| 63.33208966                              | 195.1315689                                       | 0.34840431                              | 0.05631111                                |
| 93.50173815                              | 267.0593224                                       | 0.030202831                             | 0.045784518                               |
| 127.0877586                              | 279.9817963                                       | -0.145167929                            | 0.039488267                               |
| 94.31518615                              | 201.5228443                                       | -0.023293772                            | 0.050092723                               |
| 87.54217301                              | 135.8056183                                       | -0.653158089                            | 0.066159334                               |
| 51.21747504                              | 169.3372231                                       | 0.297456498                             | 0.064068408                               |
| 40.72073471                              | 112.3628941                                       | 0.784534478                             | 0.084479669                               |
| 66.04622172                              | 211.6625767                                       | 0.216998497                             | 0.056353712                               |
| 89.40705546                              | 248.5631542                                       | -0.373756368                            | 0.052236389                               |
| 39.76483948                              | 160.4846153                                       | -0.362639711                            | 0.07044104                                |
| 83.70333621                              | 199.2605286                                       | -1.042441673                            | 0.084263039                               |
| 64.35548457                              | 161.8925629                                       | -0.235699118                            | 0.061108026                               |
| 94.166025                                | 243.2255726                                       | 0.526630937                             | 0.045157252                               |
| 54.02025243                              | 160.1831074                                       | -0.017914736                            | 0.066063243                               |
| 46.16767478                              | 152.0506458                                       | 0.336050627                             | 0.064050071                               |
| 41.03982863                              | 140.3194008                                       | 0.372310778                             | 0.07064348                                |
| 164.0767084                              | 325.0945129                                       | -0.067499181                            | 0.0403537                                 |
| 55.69774647                              | 158.9001369                                       | -0.507924122                            | 0.06169792                                |
| 99.31008994                              | 179.3738213                                       | -0.577251324                            | 0.055456408                               |
| 49.88004131                              | 144.7844296                                       | -0.160797744                            | 0.069624968                               |
| 71.23636774                              | 149.1295738                                       | 0.913861317                             | 0.060261129                               |

| log.sigma.2.0.mm.3D_firstorder_MeanAbsoluteDeviation | log.sigma.2.0.mm.3D_firstorder_Energy | log.sigma.2.0.mm.3D_firstorder_RobustMeanAbsoluteDeviation | log.sigma.2.0.mm.3D_firstorder_Median |
|------------------------------------------------------|---------------------------------------|------------------------------------------------------------|---------------------------------------|
| 114.8904037                                          | 13714365.89                           | 84.38485163                                                | -16.84065247                          |
| 84.25793358                                          | 26181586.75                           | 54.2715107                                                 | -11.13979912                          |
| 111.0004425                                          | 8523797.427                           | 77.19850828                                                | -36.17207336                          |
| 125.9418313                                          | 64368249.34                           | 90.30898292                                                | 13.97071552                           |
| 101.9144973                                          | 6163923.079                           | 68.30999768                                                | 15.14780331                           |
| 93.75123081                                          | 8137201.422                           | 71.49753346                                                | -23.51622772                          |
| 70.97483478                                          | 3118838.782                           | 42.81286917                                                | 14.35919857                           |
| 134.2223553                                          | 24186029.49                           | 104.3076182                                                | 4.78837762                            |
| 119.1477675                                          | 43941644.49                           | 87.2622771                                                 | -12.39908981                          |
| 91.26189751                                          | 43152758                              | 61.03511311                                                | -31.51489544                          |
| 96.82797486                                          | 10829379.26                           | 74.3036915                                                 | 0.789562106                           |
| 105.7649504                                          | 26669222.31                           | 72.70977004                                                | -24.85098171                          |
| 90.49260359                                          | 25301635.1                            | 66.0912418                                                 | 6.188875198                           |
| 96.77551274                                          | 14568405.8                            | 73.67254571                                                | 7.409549713                           |
| 96.53475152                                          | 13342866.98                           | 68.0976873                                                 | 16.6017704                            |
| 53.84482207                                          | 48700765.86                           | 26.64810904                                                | -3.49053216                           |
| 109.4926029                                          | 11534641.01                           | 84.49928602                                                | 6.604681969                           |
| 96.52332212                                          | 32718413.36                           | 69.58624356                                                | -17.36831379                          |
| 119.8161226                                          | 12234003.6                            | 88.47174352                                                | 30.33103085                           |
| 70.15277863                                          | 23393355.98                           | 46.95786684                                                | -4.842360973                          |
| 76.85534433                                          | 56266268.61                           | 48.85565033                                                | -25.54556179                          |
| 103.9023781                                          | 28621308.64                           | 73.93332424                                                | -0.375304461                          |
| 87.06037512                                          | 32453509.81                           | 60.92759634                                                | -26.80164909                          |
| 112.1077372                                          | 9437304.745                           | 78.01880491                                                | 35.81947708                           |
| 84.78943145                                          | 15458177.44                           | 56.1322142                                                 | -45.50614738                          |
| 111.1579553                                          | 13711535.86                           | 78.29697271                                                | -33.06297874                          |
| 69.45171922                                          | 31944682.45                           | 42.73230453                                                | -10.14874649                          |
| 95.05109106                                          | 22737978.02                           | 61.81156432                                                | -40.73760605                          |
| 128.3492712                                          | 39121893.69                           | 100.6082505                                                | 36.46257019                           |
| 80.75910323                                          | 31689344.13                           | 51.08697202                                                | -19.65563583                          |
| 84.44025708                                          | 38913287.2                            | 56.34483713                                                | -37.03041077                          |
| 76.74431781                                          | 56924403.57                           | 52.16996473                                                | -8.325203419                          |
| 119.1485195                                          | 42006342.64                           | 88.84895693                                                | 7.5179286                             |
| 113.8095752                                          | 2412558.138                           | 68.0693086                                                 | 42.95842361                           |
| 135.3269793                                          | 8532942.132                           | 100.9367346                                                | 28.86904144                           |
| 102.0394288                                          | 28870659.8                            | 78.73078142                                                | 2.745867133                           |
| 109.8824789                                          | 54883290.71                           | 77.59965114                                                | -25.59373474                          |
| 93.69410807                                          | 45813007.55                           | 66.32151817                                                | -4.984143019                          |
| 94.86645196                                          | 11591262.92                           | 67.04025496                                                | 29.69552994                           |
| 110.9533363                                          | 18834403.46                           | 82.75817011                                                | -9.245306969                          |
| 91.14491562                                          | 19946550.98                           | 62.03134976                                                | -12.89441824                          |
| 111.7666257                                          | 16505820.04                           | 85.46759208                                                | -3.696802115                          |
| 113.8998593                                          | 28731710.51                           | 88.98088358                                                | 2.276381969                           |
| 120.7110289                                          | 21525549.97                           | 89.28654999                                                | 10.46185303                           |
| 107.4583033                                          | 30975145.88                           | 80.56701281                                                | 6.60014987                            |
| 79.27086382                                          | 21590045.7                            | 56.6222134                                                 | -24.73581696                          |
| 112.1711129                                          | 85173013.63                           | 78.5048824                                                 | -0.641317487                          |
| 109.2168778                                          | 9731430.126                           | 83.57058517                                                | -12.40642071                          |
| 96.8789467                                           | 2434638.518                           | 53.30135438                                                | 36.50459099                           |
| 111.3806513                                          | 9749091.378                           | 77.49714596                                                | 36.10433197                           |
| 89.56345577                                          | 44397013.59                           | 61.50503672                                                | -11.54369211                          |
| 119.8532827                                          | 15446214.69                           | 97.67198352                                                | 0.312865794                           |
| 100.0663252                                          | 59998193.17                           | 70.98569298                                                | -10.7472353                           |
| 86.94981212                                          | 6624596.444                           | 63.64849192                                                | 2.604707003                           |
| 71.54561652                                          | 64451717.46                           | 42.88084182                                                | -5.403566837                          |
| 136.4618291                                          | 23433923.39                           | 102.5487378                                                | -15.28577328                          |
| 139.4814454                                          | 60123393.1                            | 106.2129365                                                | 5.274323463                           |
| 113.8648181                                          | 27579233.89                           | 74.99499089                                                | 35.14412689                           |
| 96.20647361                                          | 1246481.76                            | 65.81286698                                                | -13.27707195                          |
| 81.42782005                                          | 9009257.084                           | 59.49238099                                                | -12.50407887                          |
| 111.2143351                                          | 37081042.29                           | 84.16296727                                                | -32.01608276                          |
| 107.4394644                                          | 102014486.7                           | 74.4683454                                                 | -3.773471832                          |
| 70.03233657                                          | 26896076.4                            | 45.36146226                                                | 1.020049512                           |
| 68.5485358                                           | 25289973.76                           | 41.77818226                                                | -4.144472599                          |
| 97.49116696                                          | 3087939.17                            | 72.24273009                                                | -12.03724289                          |
| 105.9657265                                          | 30351339.1                            | 70.43032476                                                | 16.33638382                           |
| 122.2040017                                          | 8519675.509                           | 90.89149598                                                | 14.40423965                           |
| 112.3529673                                          | 58016908.97                           | 84.08832627                                                | -10.68592262                          |
| 107.6300568                                          | 7413737.643                           | 83.15033423                                                | -15.49532032                          |
| 113.1856228                                          | 38809843.06                           | 81.73404808                                                | -16.42289352                          |
| 104.2827413                                          | 49557784.07                           | 75.82606818                                                | -26.03292179                          |
| 106.9706765                                          | 17961155.77                           | 82.35790455                                                | -18.33128929                          |
| 83.60276583                                          | 61462019.18                           | 55.62031987                                                | -13.18540287                          |
| 75.14646984                                          | 67438742.63                           | 48.92232104                                                | -20.15971565                          |
| 80.59073093                                          | 116327591.1                           | 48.43954987                                                | 5.957009315                           |
| 134.0916845                                          | 28175113.66                           | 101.9006973                                                | 2.362899065                           |
| 108.305388                                           | 18829088.75                           | 81.70171314                                                | -15.35409164                          |
| 115.1967263                                          | 11295537.21                           | 89.88693747                                                | -52.87628174                          |
| 112.0802155                                          | 32584265.23                           | 84.8495428                                                 | -36.4825573                           |
| 107.2869901                                          | 48673316.92                           | 79.0523067                                                 | -32.9751873                           |
| 138.1250113                                          | 14085305.4                            | 106.2323074                                                | -36.54566383                          |
| 152.2838013                                          | 43406492.98                           | 115.6403173                                                | 12.72023392                           |
| 117.5082248                                          | 64911062.39                           | 79.74284977                                                | 11.89819956                           |
| 100.7760103                                          | 2704708.324                           | 61.77025849                                                | 40.38646698                           |
| 93.21786902                                          | 42666669.62                           | 68.93570534                                                | -15.14329433                          |
| 72.51643181                                          | 53177604.25                           | 46.2154205                                                 | -9.760742664                          |
| 110.5126091                                          | 13217783.84                           | 84.68628858                                                | -35.0194912                           |
| 128.2206089                                          | 34211724.76                           | 100.5068906                                                | 25.54094505                           |
| 86.03293326                                          | 1938529.938                           | 64.50278842                                                | 25.5066185                            |
| 123.2053705                                          | 2409867.015                           | 88.99690132                                                | 43.01110458                           |
| 97.06252376                                          | 65265360.35                           | 64.68629499                                                | -3.547105312                          |
| 136.3633616                                          | 20497520.31                           | 97.64757908                                                | -54.95772552                          |
| 94.98154348                                          | 15788116.17                           | 63.251655                                                  | -9.65562401                           |
| 89.22455772                                          | 52176714.04                           | 62.37336225                                                | -9.803514481                          |
| 82.66593312                                          | 63073204.63                           | 57.60240041                                                | -15.30398417                          |
| 179.3188732                                          | 11122755.75                           | 137.5561175                                                | -22.21004295                          |
| 97.06754875                                          | 18803759.39                           | 66.23635747                                                | 25.74496841                           |
| 116.584014                                           | 2635539.172                           | 78.55035765                                                | 42.08930588                           |
| 84.61330253                                          | 4435916.443                           | 58.3603063                                                 | 29.75474167                           |
| 107.8061408                                          | 17259357.89                           | 67.56493685                                                | -37.3457756                           |

| log.sigma.2.0.mm.3D_firstorder_TotalEnergy | log.sigma.2.0.mm.3D_firstorder_Maximum | log.sigma.2.0.mm.3D_firstorder_RootMeanSquared | log.sigma.2.0.mm.3D_firstorder_90Percentile | log.sigma.2.0.mm.3D_firstorder_Minimum |
|--------------------------------------------|----------------------------------------|------------------------------------------------|---------------------------------------------|----------------------------------------|
| 370287879.1                                | 492.8893433                            | 139.3752038                                    | 178.4472885                                 | -373.5688782                           |
| 706902842.3                                | 411.9223633                            | 112.2741391                                    | 153.7628571                                 | -394.3044739                           |
| 230142530.5                                | 546.0161133                            | 140.143092                                     | 194.2965057                                 | -318.8163452                           |
| 1737942732                                 | 535.3439331                            | 156.2951634                                    | 213.1914246                                 | -498.8410034                           |
| 166425923.1                                | 393.9523621                            | 131.0332102                                    | 156.9976532                                 | -415.1544495                           |
| 219704438.4                                | 263.2397156                            | 112.4946961                                    | 118.5569748                                 | -286.0191345                           |
| 84208647.11                                | 224.1868439                            | 96.20142663                                    | 88.56531677                                 | -426.5862732                           |
| 653022796.2                                | 391.6911621                            | 155.3632968                                    | 186.7499634                                 | -359.5439148                           |
| 1186424401                                 | 431.3444519                            | 145.3820901                                    | 169.2445038                                 | -401.0517578                           |
| 1165124466                                 | 502.4283142                            | 118.0221637                                    | 152.1333954                                 | -446.6446228                           |
| 292393239.9                                | 242.7849426                            | 114.4324054                                    | 119.1386826                                 | -314.7623291                           |
| 720069002.2                                | 501.0018311                            | 134.1470337                                    | 181.067308                                  | -453.1353455                           |
| 683144147.7                                | 469.7522888                            | 110.4510676                                    | 144.2653458                                 | -289.6276855                           |
| 393346956.6                                | 354.6858826                            | 114.1524175                                    | 153.690773                                  | -254.9894409                           |
| 360257408.4                                | 423.2086487                            | 121.0222965                                    | 161.1290436                                 | -398.8941956                           |
| 1314920678                                 | 591.5078125                            | 83.72771633                                    | 100.5472839                                 | -359.6410522                           |
| 311435307.3                                | 351.5987854                            | 128.5506657                                    | 139.2236969                                 | -318.6429138                           |
| 883397160.8                                | 381.3308105                            | 118.4491216                                    | 161.4160187                                 | -288.7756653                           |
| 330318097.2                                | 363.5354309                            | 144.9849121                                    | 198.437883                                  | -376.8910217                           |
| 631620611.5                                | 310.1383362                            | 91.38811308                                    | 123.3465652                                 | -331.3687439                           |
| 1519189252                                 | 432.5672302                            | 103.7821046                                    | 136.1906235                                 | -394.6949463                           |
| 772775333.2                                | 433.5527039                            | 128.9972702                                    | 178.9431183                                 | -318.5031128                           |
| 876244765                                  | 354.2356262                            | 109.0109153                                    | 152.4508514                                 | -303.1495667                           |
| 254807228.1                                | 368.0626526                            | 104.0720393                                    | 172.1766663                                 | -464.287384                            |
| 417370790.9                                | 544.309021                             | 113.3093898                                    | 131.9755203                                 | -330.6287842                           |
| 370211468.1                                | 402.8935852                            | 150.5605075                                    | 172.5736435                                 | -455.9385986                           |
| 862506426.1                                | 446.8258972                            | 96.00304508                                    | 121.6169052                                 | -432.6981201                           |
| 613925406.5                                | 469.2563477                            | 125.9658513                                    | 161.6657532                                 | -367.2747498                           |
| 1056291130                                 | 367.2651978                            | 148.880418                                     | 198.2407349                                 | -391.2413025                           |
| 855612291.4                                | 507.9544678                            | 111.652603                                     | 124.8103714                                 | -326.728302                            |
| 1050658754                                 | 508.6187134                            | 110.6378419                                    | 139.8969666                                 | -395.7707825                           |
| 1536958896                                 | 428.484375                             | 97.97649473                                    | 142.1814087                                 | -259.9104004                           |
| 1134171251                                 | 522.5444336                            | 173.7436757                                    | 185.5367065                                 | -431.9915161                           |
| 65139069.72                                | 339.4348755                            | 152.3078278                                    | 172.7363327                                 | -441.5001526                           |
| 230389437.6                                | 333.9630127                            | 160.3172883                                    | 202.437262                                  | -377.1213989                           |
| 779507814.6                                | 331.5793762                            | 115.5085054                                    | 146.2523453                                 | -354.659729                            |
| 1481848849                                 | 563.6079102                            | 138.0460002                                    | 193.6867386                                 | -331.6300659                           |
| 1236951204                                 | 395.8071594                            | 116.8726449                                    | 157.8267563                                 | -432.811615                            |
| 312964098.7                                | 347.7041321                            | 117.820847                                     | 141.3996887                                 | -340.3761292                           |
| 508528893.5                                | 406.7660828                            | 133.9948758                                    | 153.8357819                                 | -392.8659668                           |
| 538556876.5                                | 376.7317505                            | 116.3282417                                    | 162.5789841                                 | -409.0065918                           |
| 445657141.1                                | 387.9660339                            | 131.6049131                                    | 149.6396149                                 | -352.1186523                           |
| 775756183.8                                | 330.2596741                            | 132.2799934                                    | 147.8510117                                 | -373.6331177                           |
| 581189849.2                                | 433.2763062                            | 144.9156187                                    | 182.3570557                                 | -364.431427                            |
| 836328938.7                                | 327.7383423                            | 128.4277536                                    | 150.3023544                                 | -368.1236572                           |
| 582931233.9                                | 419.1419983                            | 98.43945204                                    | 134.4280441                                 | -248.8076782                           |
| 2299671368                                 | 523.1633301                            | 141.2994858                                    | 191.3909836                                 | -556.0782471                           |
| 262748613.4                                | 323.5221252                            | 129.1974842                                    | 151.994458                                  | -303.9407959                           |
| 65735239.98                                | 338.6977844                            | 134.7922259                                    | 138.9618256                                 | -407.6397705                           |
| 263225467.2                                | 456.8572083                            | 140.0566957                                    | 155.3529053                                 | -394.6781616                           |
| 1198719367                                 | 400.6031494                            | 113.8701784                                    | 148.1458298                                 | -359.0019226                           |
| 417047796.6                                | 252.8942871                            | 136.6653062                                    | 139.803067                                  | -325.1935425                           |
| 1619951216                                 | 480.2546997                            | 125.3085103                                    | 162.4693146                                 | -538.3151855                           |
| 178864104                                  | 347.4099731                            | 105.8731838                                    | 147.2443542                                 | -283.5158997                           |
| 1740196372                                 | 489.6340332                            | 99.4016419                                     | 140.451062                                  | -357.3665771                           |
| 632715931.4                                | 451.1877136                            | 162.2781479                                    | 202.518515                                  | -436.2893066                           |
| 1623331614                                 | 583.5360718                            | 165.577921                                     | 195.7055145                                 | -450.9663086                           |
| 744639315                                  | 387.1213989                            | 146.0467297                                    | 166.2731354                                 | -455.3841248                           |
| 336550187.6                                | 425.6521606                            | 123.7459044                                    | 147.5900146                                 | -386.1238708                           |
| 243249941.3                                | 286.0875549                            | 101.1245346                                    | 122.6604691                                 | -569.8294067                           |
| 1001188142                                 | 397.9699097                            | 132.2849654                                    | 170.0978027                                 | -365.3925781                           |
| 2754391141                                 | 547.5995483                            | 136.4645698                                    | 175.7460464                                 | -493.2356262                           |
| 726194062.8                                | 394.4510498                            | 93.29647284                                    | 128.8853363                                 | -383.3152466                           |
| 682829291.5                                | 297.5874023                            | 96.23063228                                    | 126.3351517                                 | -860.480896                            |
| 83374357.58                                | 256.1752625                            | 119.2901271                                    | 138.9515991                                 | -291.1013794                           |
| 819486155.7                                | 560.3156128                            | 139.7987218                                    | 199.4249603                                 | -349.1214294                           |
| 230031238.7                                | 327.2090759                            | 147.0494539                                    | 151.8106308                                 | -364.8696594                           |
| 1566456542                                 | 488.3146362                            | 134.7119042                                    | 170.5720215                                 | -482.4758911                           |
| 200170916.4                                | 263.6795349                            | 128.9291671                                    | 128.6438255                                 | -363.0588379                           |
| 1047865763                                 | 493.8965454                            | 138.9200427                                    | 190.4590607                                 | -395.9830017                           |
| 1338060170                                 | 387.4971924                            | 127.6789045                                    | 178.7165054                                 | -474.8619385                           |
| 484951205.8                                | 354.4762878                            | 126.1305149                                    | 142.051413                                  | -329.427063                            |
| 1659474518                                 | 415.0460815                            | 109.0541405                                    | 143.1146301                                 | -379.9538879                           |
| 1820846051                                 | 432.7550049                            | 100.2073064                                    | 132.165863                                  | -383.0524902                           |
| 3140844960                                 | 521.8344727                            | 112.5693159                                    | 145.9732208                                 | -508.5236511                           |
| 760728068.8                                | 360.8299255                            | 158.8915278                                    | 181.2178879                                 | -434.4848938                           |
| 508385396.2                                | 433.9620056                            | 129.8338886                                    | 143.4007874                                 | -339.6237183                           |
| 304979504.7                                | 319.7515259                            | 136.0781912                                    | 164.4757034                                 | -329.5210266                           |
| 879775161.2                                | 334.0122375                            | 135.9110212                                    | 154.0974854                                 | -355.8464661                           |
| 1314179557                                 | 567.4248047                            | 130.7759922                                    | 165.3879166                                 | -376.9030457                           |
| 380303245.7                                | 375.9095764                            | 167.1736657                                    | 172.6198395                                 | -431.170929                            |
| 1171975311                                 | 486.6280823                            | 179.9131719                                    | 227.481369                                  | -545.578125                            |
| 1752598685                                 | 509.796936                             | 152.4760566                                    | 214.1722473                                 | -823.961853                            |
| 73027124.74                                | 320.2820435                            | 136.5765751                                    | 177.8546143                                 | -351.624115                            |
| 1152000080                                 | 365.4870605                            | 112.1709706                                    | 159.6162872                                 | -310.60849                             |
| 1435795315                                 | 639.6209106                            | 98.54456213                                    | 122.9517746                                 | -534.0587769                           |
| 356880163.6                                | 333.0527039                            | 100.3435437                                    | 160.8812195                                 | -322.2049561                           |
| 923716568.5                                | 322.8837891                            | 148.4709975                                    | 159.6345963                                 | -458.1195679                           |
| 52340308.34                                | 218.0591736                            | 102.9225912                                    | 137.159964                                  | -309.0754395                           |
| 65066409.41                                | 136.0791473                            | 151.4962522                                    | 101.3582977                                 | -418.9855347                           |
| 1762164730                                 | 415.9634705                            | 128.1364842                                    | 162.7020569                                 | -684.5469971                           |
| 553433048.5                                | 515.3703003                            | 170.3916515                                    | 216.9843292                                 | -493.1727295                           |
| 426279136.6                                | 342.2135925                            | 124.2910076                                    | 159.4588409                                 | -450.2199402                           |
| 1408771279                                 | 486.3234863                            | 112.9475223                                    | 138.149617                                  | -406.4559326                           |
| 1702976525                                 | 436.9952393                            | 104.2278869                                    | 138.7423859                                 | -390.0055237                           |
| 300314405.3                                | 455.5267334                            | 209.6746562                                    | 240.9451294                                 | -575.6443481                           |
| 507701503.5                                | 369.309845                             | 124.3527962                                    | 158.0834579                                 | -366.0197449                           |
| 71159557.64                                | 313.0819397                            | 146.380148                                     | 173.2933868                                 | -434.7818604                           |
| 119769744                                  | 300.6835327                            | 108.1862515                                    | 143.537381                                  | -293.1362305                           |
| 466002663                                  | 527.0333252                            | 146.2431557                                    | 195.6730896                                 | -438.4146729                           |

| log.sigma.2.0.mm.3D_firstorder_Entropy | log.sigma.2.0.mm.3D_firstorder_StandardDeviation | log.sigma.2.0.mm.3D_firstorder_Range | log.sigma.2.0.mm.3D_firstorder_Variance | log.sigma.2.0.mm.3D_firstorder_10Percentile |
|----------------------------------------|--------------------------------------------------|--------------------------------------|-----------------------------------------|---------------------------------------------|
| 4.45718616                             | 139.2332747                                      | 866.4582214                          | 19385.90479                             | -173.0931702                                |
| 4.119020761                            | 112.1691686                                      | 806.2268372                          | 12581.92239                             | -148.1308899                                |
| 4.351718977                            | 139.8727604                                      | 864.8324585                          | 19564.38911                             | -166.2531631                                |
| 4.667860116                            | 155.5008834                                      | 1034.184937                          | 24180.52474                             | -187.6259003                                |
| 4.329643089                            | 130.9389366                                      | 809.1068115                          | 17145.00512                             | -165.8699738                                |
| 4.105092374                            | 110.3860939                                      | 549.2588501                          | 12185.08973                             | -161.944455                                 |
| 3.78684357                             | 96.08177283                                      | 650.7731171                          | 9231.70707                              | -136.9877716                                |
| 4.553098675                            | 155.268789                                       | 751.2350769                          | 24108.39685                             | -122.8374374                                |
| 4.560074959                            | 144.7193947                                      | 832.3962097                          | 20943.7032                              | -207.6993042                                |
| 4.205653864                            | 117.4162753                                      | 949.072937                           | 13786.58172                             | -142.7203964                                |
| 4.124563462                            | 113.4410243                                      | 557.5472717                          | 12868.866                               | -170.9519135                                |
| 4.407139544                            | 133.9866008                                      | 954.1371765                          | 17952.4092                              | -157.4487305                                |
| 4.150323885                            | 110.219265                                       | 759.3799744                          | 12148.28637                             | -133.1440948                                |
| 4.173706473                            | 114.0638363                                      | 609.6753235                          | 13010.55876                             | -142.0162216                                |
| 4.292566004                            | 120.5344357                                      | 822.1028442                          | 14528.5502                              | -142.4497986                                |
| 3.462459163                            | 83.68501312                                      | 951.1488647                          | 7003.181421                             | -90.79609833                                |
| 4.294076296                            | 128.1002727                                      | 670.2416992                          | 16409.67987                             | -190.8375244                                |
| 4.233043074                            | 118.4442946                                      | 670.1064758                          | 14029.05093                             | -145.4683365                                |
| 4.504864844                            | 144.4913543                                      | 740.4264526                          | 20877.75147                             | -177.1464905                                |
| 3.863980322                            | 91.38007566                                      | 641.5070801                          | 8350.318228                             | -114.8797607                                |
| 3.978455257                            | 102.7781367                                      | 827.2621765                          | 10563.34538                             | -130.044223                                 |
| 4.369398377                            | 128.6782551                                      | 752.0558167                          | 16558.09332                             | -149.9964798                                |
| 4.093802088                            | 108.7168574                                      | 657.3851929                          | 11819.35509                             | -134.5388887                                |
| 4.435961202                            | 139.6839932                                      | 832.3500366                          | 19511.61797                             | -184.2021484                                |
| 4.073540758                            | 110.4274617                                      | 874.9378052                          | 12194.2243                              | -145.3215485                                |
| 4.455543973                            | 139.2519264                                      | 858.8321838                          | 19391.09901                             | -175.30289                                  |
| 3.879252564                            | 95.94632998                                      | 879.5240173                          | 9205.698237                             | -112.4511681                                |
| 4.239847672                            | 124.1781494                                      | 836.5310974                          | 15420.2128                              | -162.2504791                                |
| 4.503508872                            | 148.3739274                                      | 758.5065002                          | 22014.82233                             | -187.8276672                                |
| 4.057999112                            | 109.7900032                                      | 834.6827698                          | 12053.8448                              | -159.248967                                 |
| 4.077258542                            | 109.1426833                                      | 904.3894958                          | 11912.12532                             | -138.48703                                  |
| 3.961086128                            | 97.7811117                                       | 688.3947754                          | 9561.145806                             | -107.5396019                                |
| 4.522069938                            | 143.6773009                                      | 954.5359497                          | 20643.16678                             | -179.6837097                                |
| 4.2420803                              | 151.8491595                                      | 780.9350281                          | 23058.16724                             | -201.3329483                                |
| 4.624481865                            | 160.2905008                                      | 711.0844116                          | 25693.04466                             | -223.9483475                                |
| 4.233957057                            | 119.4263869                                      | 686.2391052                          | 14262.66188                             | -165.7804565                                |
| 4.410122367                            | 137.8591742                                      | 895.2379761                          | 19005.15191                             | -167.8332428                                |
| 4.255874821                            | 116.8511699                                      | 828.6187744                          | 13654.1959                              | -138.8255463                                |
| 4.197902954                            | 117.2920932                                      | 688.0802612                          | 13757.43512                             | -161.3439911                                |
| 4.412430052                            | 133.6915347                                      | 799.6320496                          | 17873.42644                             | -183.5997711                                |
| 4.229784033                            | 116.2064384                                      | 785.7383423                          | 13503.93633                             | -148.7968816                                |
| 4.347115925                            | 131.1755714                                      | 740.0846863                          | 17207.03053                             | -182.6563873                                |
| 4.336684908                            | 131.8404871                                      | 703.8927917                          | 17381.91404                             | -189.3671432                                |
| 4.528362478                            | 144.9085148                                      | 797.7077332                          | 20998.47767                             | -190.9235931                                |
| 4.362150002                            | 128.1650321                                      | 695.8619995                          | 16426.27546                             | -181.9826874                                |
| 3.937667633                            | 98.08523648                                      | 667.9496765                          | 9620.713616                             | -124.5404381                                |
| 4.531625818                            | 141.1223266                                      | 1079.241577                          | 19915.51106                             | -166.2772522                                |
| 4.303763187                            | 128.3221766                                      | 627.4629211                          | 16466.58101                             | -187.2739105                                |
| 4.01486554                             | 134.745721                                       | 746.3375549                          | 18156.40934                             | -180.1168381                                |
| 4.379180481                            | 139.8705786                                      | 851.5353699                          | 19563.77877                             | -207.2888458                                |
| 4.209970626                            | 113.8321082                                      | 759.605072                           | 12957.74887                             | -141.9207108                                |
| 4.259929619                            | 134.7676499                                      | 578.0878296                          | 18162.31947                             | -209.0771393                                |
| 4.341602457                            | 125.2553162                                      | 1018.569885                          | 15688.89425                             | -162.7807007                                |
| 4.084863543                            | 105.7415519                                      | 630.9258728                          | 11181.27581                             | -128.3526154                                |
| 3.88727201                             | 99.38736882                                      | 847.0006104                          | 9877.902352                             | -124.8988403                                |
| 4.700583099                            | 162.8506458                                      | 887.4770203                          | 26520.33283                             | -223.875058                                 |
| 4.714722092                            | 165.4576291                                      | 1124.50238                           | 27376.22701                             | -222.4615265                                |
| 4.467956437                            | 145.965715                                       | 842.5055237                          | 21305.98996                             | -212.8715851                                |
| 4.294850075                            | 123.0899717                                      | 811.7760315                          | 15151.09683                             | -175.1053314                                |
| 3.979028909                            | 100.9367701                                      | 855.9169617                          | 10188.23156                             | -121.7177505                                |
| 4.365505016                            | 131.7609157                                      | 763.3624878                          | 17360.93891                             | -170.6528076                                |
| 4.453532399                            | 136.3701697                                      | 1040.835175                          | 18596.82317                             | -160.2694611                                |
| 3.85872819                             | 92.8721492                                       | 777.7662964                          | 8625.234745                             | -101.765065                                 |
| 3.828441538                            | 96.1064018                                       | 1158.068298                          | 9236.440467                             | -123.1425323                                |
| 4.177743177                            | 118.5440001                                      | 547.2766418                          | 14052.67995                             | -183.512915                                 |
| 4.463752885                            | 138.0643288                                      | 909.4370422                          | 19061.76552                             | -150.0998901                                |
| 4.452396022                            | 146.2664384                                      | 692.0787354                          | 21393.87099                             | -231.0161652                                |
| 4.433680216                            | 134.7051467                                      | 970.7905273                          | 18145.47655                             | -169.5329266                                |
| 4.287344319                            | 126.3618873                                      | 626.7383728                          | 15967.32655                             | -195.0356293                                |
| 4.476280661                            | 138.917678                                       | 889.8795471                          | 19298.12126                             | -163.7147675                                |
| 4.32037076                             | 127.576884                                       | 862.3591309                          | 16275.86133                             | -156.2458099                                |
| 4.287687488                            | 125.212968                                       | 683.9033508                          | 15678.28736                             | -180.2808502                                |
| 4.11416273                             | 108.9622011                                      | 794.9999695                          | 11872.76127                             | -133.0506226                                |
| 3.957342322                            | 99.52052861                                      | 815.8074951                          | 9904.335614                             | -128.0331726                                |
| 4.116181945                            | 112.1708642                                      | 1030.358124                          | 12582.30278                             | -123.6055046                                |
| 4.641480829                            | 158.2499384                                      | 795.3148193                          | 25043.04299                             | -226.5178757                                |
| 4.353675371                            | 128.7285934                                      | 773.5857239                          | 16571.05075                             | -185.0767456                                |
| 4.312834019                            | 133.5666246                                      | 649.2752525                          | 17840.04321                             | -182.8243637                                |
| 4.394400749                            | 133.4323882                                      | 689.8587036                          | 17804.20221                             | -194.5448608                                |
| 4.355458913                            | 130.2202762                                      | 944.3278503                          | 16957.32034                             | -170.8798523                                |
| 4.621351341                            | 162.5733089                                      | 807.0805054                          | 26430.08076                             | -249.1969208                                |
| 4.82698879                             | 179.9128878                                      | 1032.206207                          | 32368.64719                             | -242.116333                                 |
| 4.605524618                            | 151.5590594                                      | 1333.758789                          | 22970.1485                              | -175.6638458                                |
| 4.253344844                            | 135.1309908                                      | 671.9061584                          | 18260.38468                             | -180.6044586                                |
| 4.153871859                            | 112.1419973                                      | 676.0955505                          | 12575.82756                             | -131.2619019                                |
| 3.928972359                            | 98.54427451                                      | 1173.679688                          | 9710.974039                             | -106.4309883                                |
| 4.32480312                             | 129.5752468                                      | 655.2576599                          | 16789.74459                             | -167.1070023                                |
| 4.443410648                            | 148.1276617                                      | 781.0033659                          | 21941.80417                             | -218.4125793                                |
| 3.969236027                            | 102.2876545                                      | 527.134613                           | 10462.76426                             | -124.8013382                                |
| 3.941766637                            | 147.5913912                                      | 555.064682                           | 21783.21875                             | -258.6622925                                |
| 4.349220057                            | 128.1292621                                      | 1100.510468                          | 16417.10781                             | -155.5321503                                |
| 4.685839085                            | 168.1479633                                      | 1008.54303                           | 28273.73756                             | -218.9629135                                |
| 4.269472451                            | 124.0439948                                      | 792.4335327                          | 15386.91265                             | -165.6531982                                |
| 4.202599751                            | 112.7560319                                      | 892.7794189                          | 12713.92274                             | -143.8199219                                |
| 4.074186539                            | 104.1908069                                      | 827.0007629                          | 10855.72425                             | -126.4863625                                |
| 4.871665504                            | 208.5742468                                      | 1031.171082                          | 43503.21643                             | -286.0021912                                |
| 4.292626714                            | 123.8210774                                      | 805.3295898                          | 15331.6592                              | -155.8539276                                |
| 4.405158672                            | 145.9341941                                      | 677.8638                             | 21296.789                               | -223.2238556                                |
| 4.089483955                            | 106.7379445                                      | 593.8197632                          | 11392.98879                             | -130.447818                                 |
| 4.410804972                            | 145.310601                                       | 965.447998                           | 21115.17076                             | -178.3233368                                |

| log.sigma.2.0.mm.3D_firstorder_Kurtosis | log.sigma.2.0.mm.3D_firstorder_Mean | log.sigma.2.0.mm.3D_glrIm_ShortRunLowGrayLevelEmphasis | log.sigma.2.0.mm.3D_glrIm_GrayLevelVariance |
|-----------------------------------------|-------------------------------------|--------------------------------------------------------|---------------------------------------------|
| 2.690582131                             | -6.288294906                        | 0.009950755                                            | 31.69374068                                 |
| 3.43636179                              | -4.85385551                         | 0.005253932                                            | 21.92145532                                 |
| 3.679318266                             | -8.70040935                         | 0.013265958                                            | 32.04124408                                 |
| 2.787044335                             | 15.73700666                         | 0.003555629                                            | 39.44588382                                 |
| 3.228177422                             | 4.969612693                         | 0.00744776                                             | 28.01746159                                 |
| 2.270429919                             | -21.67872029                        | 0.015621243                                            | 19.65932773                                 |
| 4.740017837                             | -4.796604613                        | 0.006792449                                            | 15.43861363                                 |
| 2.11081275                              | -5.41822258                         | 0.010265506                                            | 38.81866362                                 |
| 2.555664131                             | -13.86538606                        | 0.006482603                                            | 34.16391519                                 |
| 3.5504102                               | -11.94359249                        | 0.004017162                                            | 23.04349528                                 |
| 2.154327299                             | -15.03028291                        | 0.012627139                                            | 20.947126                                   |
| 3.195037959                             | -6.558769286                        | 0.004218878                                            | 29.59789536                                 |
| 2.914925694                             | 7.152060198                         | 0.010309199                                            | 19.81011836                                 |
| 2.34664088                              | 4.496182928                         | 0.01677351                                             | 21.21350371                                 |
| 2.981198102                             | 10.85569184                         | 0.00637475                                             | 23.75452596                                 |
| 7.156859034                             | 2.673772711                         | 0.004495308                                            | 12.96246485                                 |
| 2.208399466                             | -10.75145511                        | 0.014877293                                            | 26.53555169                                 |
| 2.79783483                              | -1.069334004                        | 0.011260377                                            | 23.14164333                                 |
| 2.394049263                             | 11.95296065                         | 0.008394951                                            | 33.97305386                                 |
| 3.177511332                             | -1.212016721                        | 0.005886541                                            | 14.30195368                                 |
| 3.665787751                             | -14.40068924                        | 0.004894386                                            | 18.29432543                                 |
| 2.978052039                             | 9.066553676                         | 0.009552982                                            | 26.96714877                                 |
| 2.809801407                             | -8.001534769                        | 0.008720578                                            | 19.57570307                                 |
| 3.10637839                              | 10.41912732                         | 0.005940625                                            | 32.03138034                                 |
| 4.386571108                             | -25.39278457                        | 0.00912259                                             | 20.42096913                                 |
| 3.024038541                             | -19.13523617                        | 0.005730298                                            | 32.13148451                                 |
| 4.800252238                             | -3.299458691                        | 0.003825699                                            | 16.13427513                                 |
| 3.580140882                             | -21.14669925                        | 0.0081771                                              | 25.65554938                                 |
| 2.070306374                             | 12.27014801                         | 0.0073576                                              | 35.6425603                                  |
| 4.201559337                             | -20.30908531                        | 0.008315795                                            | 21.08906195                                 |
| 3.792013008                             | -18.12751307                        | 0.005191008                                            | 19.94768912                                 |
| 3.257329358                             | 6.18447359                          | 0.011110231                                            | 16.11525103                                 |
| 2.689432998                             | 4.367780382                         | 0.00503512                                             | 33.80730379                                 |
| 3.749391167                             | 11.81131484                         | 0.017715355                                            | 38.27525384                                 |
| 2.258668599                             | 2.930575073                         | 0.01257559                                             | 41.59572626                                 |
| 2.176610191                             | -5.453802524                        | 0.006741715                                            | 23.19071045                                 |
| 2.95772856                              | -7.179572016                        | 0.008936753                                            | 31.55964436                                 |
| 2.968005838                             | 2.240363473                         | 0.003898152                                            | 22.76575691                                 |
| 2.759690673                             | 11.14974791                         | 0.009672581                                            | 22.18451902                                 |
| 2.58681543                              | -9.011121634                        | 0.007676087                                            | 29.26419492                                 |
| 3.076125474                             | -5.321982305                        | 0.00517009                                             | 22.86516951                                 |
| 2.324599492                             | -10.62179904                        | 0.008417427                                            | 27.97472253                                 |
| 2.132093098                             | -10.77416453                        | 0.009133507                                            | 28.14259082                                 |
| 2.521328963                             | -1.434881995                        | 0.011517519                                            | 34.18584957                                 |
| 2.363292333                             | -8.210507927                        | 0.008896596                                            | 26.77736316                                 |
| 2.814230966                             | -8.343386769                        | 0.017018864                                            | 16.05602543                                 |
| 3.168173269                             | 7.073444953                         | 0.002416917                                            | 32.78318338                                 |
| 2.154313734                             | -15.01362433                        | 0.013075482                                            | 26.63413404                                 |
| 4.43292802                              | 3.540455736                         | 0.022426845                                            | 30.27083783                                 |
| 2.938650804                             | 7.217981249                         | 0.008414818                                            | 31.61047695                                 |
| 3.107359831                             | -2.944257848                        | 0.005956682                                            | 21.6465211                                  |
| 1.787265358                             | -22.695516                          | 0.012607601                                            | 29.40516824                                 |
| 3.046936159                             | -3.650823797                        | 0.002517792                                            | 26.17048164                                 |
| 2.521337892                             | 5.277805444                         | 0.011344223                                            | 18.06840781                                 |
| 4.024677529                             | 1.668550051                         | 0.004999282                                            | 17.15430346                                 |
| 2.346937884                             | -11.80765608                        | 0.006795474                                            | 42.99066674                                 |
| 2.440878028                             | -6.310381431                        | 0.003298889                                            | 44.14491587                                 |
| 3.291936266                             | 4.863875636                         | 0.006044968                                            | 34.8374363                                  |
| 2.978032732                             | -12.72603688                        | 0.007742353                                            | 25.65425668                                 |
| 4.687667037                             | -6.159540128                        | 0.004186172                                            | 16.63725515                                 |
| 2.402671522                             | -11.7632126                         | 0.008889201                                            | 28.2471041                                  |
| 3.528611452                             | 5.075001319                         | 0.003080681                                            | 30.96452715                                 |
| 4.001775761                             | 8.888031269                         | 0.004497988                                            | 14.71596538                                 |
| 7.068779458                             | 4.888161317                         | 0.001190392                                            | 16.59229853                                 |
| 2.263057195                             | -13.32120375                        | 0.018969716                                            | 22.29209258                                 |
| 3.393749783                             | 21.95261011                         | 0.009639539                                            | 31.20348234                                 |
| 2.351241728                             | -15.15489716                        | 0.019128036                                            | 34.72669541                                 |
| 2.600094927                             | -1.349294959                        | 0.003234191                                            | 29.69209034                                 |
| 2.159442753                             | -25.60085133                        | 0.012933174                                            | 26.07221276                                 |
| 2.739081953                             | -0.810551529                        | 0.007009125                                            | 31.51252614                                 |
| 2.60108394                              | -5.103070492                        | 0.003498805                                            | 26.59058309                                 |
| 2.298121001                             | -15.18615943                        | 0.009480911                                            | 25.44598761                                 |
| 3.565512241                             | -4.477086029                        | 0.004757922                                            | 20.17665664                                 |
| 3.557339922                             | -11.71190199                        | 0.004717699                                            | 16.85816973                                 |
| 4.757426246                             | 9.462985729                         | 0.002464518                                            | 21.56964004                                 |
| 2.260078037                             | -14.26445306                        | 0.007931889                                            | 40.58889314                                 |
| 2.442898527                             | -16.90526183                        | 0.012535125                                            | 26.9546235                                  |
| 2.073055828                             | -26.02366055                        | 0.011739783                                            | 28.78299391                                 |
| 2.228783456                             | -25.83802376                        | 0.010913885                                            | 29.0183471                                  |
| 2.871935344                             | -12.04324636                        | 0.006098907                                            | 27.84149168                                 |
| 2.185064567                             | -38.94809052                        | 0.01163783                                             | 43.03441179                                 |
| 2.314973256                             | 0.319744608                         | 0.003916531                                            | 52.45191517                                 |
| 3.438833156                             | 16.69728572                         | 0.001295216                                            | 37.75453826                                 |
| 3.407885749                             | 19.81858156                         | 0.016556057                                            | 29.90354259                                 |
| 2.488984797                             | 2.549328695                         | 0.00823419                                             | 20.5559078                                  |
| 5.949521878                             | -0.238089348                        | 0.002197033                                            | 16.68591951                                 |
| 2.25376526                              | -14.13134049                        | 0.015650037                                            | 27.31733137                                 |
| 2.105254459                             | -10.09122991                        | 0.004854499                                            | 35.36578464                                 |
| 2.545324334                             | 11.41470603                         | 0.012957873                                            | 16.80919876                                 |
| 3.003877036                             | -34.1744887                         | 0.038312994                                            | 35.01483791                                 |
| 4.331557884                             | -1.360429724                        | 0.002256613                                            | 27.81666451                                 |
| 2.901742459                             | -27.56043057                        | 0.005272264                                            | 46.18418608                                 |
| 3.080287299                             | -7.832108421                        | 0.004490969                                            | 26.27942415                                 |
| 3.40432781                              | -6.574196738                        | 0.004401316                                            | 21.41835565                                 |
| 3.248347055                             | -2.779955431                        | 0.004630269                                            | 18.24072496                                 |
| 2.320627854                             | -21.45332225                        | 0.007448682                                            | 70.54277293                                 |
| 3.491526434                             | 11.48732861                         | 0.006274012                                            | 25.21234434                                 |
| 2.873101134                             | 11.41747521                         | 0.024150705                                            | 34.83963846                                 |
| 2.895912194                             | 17.64302225                         | 0.012510487                                            | 18.48367151                                 |
| 4.209590919                             | -16.48908195                        | 0.005476955                                            | 35.62416328                                 |



| log.sigma.2.0.mm.3D_glrIm_LowGrayLevelRunEmphasis | log.sigma.2.0.mm.3D_glrIm_GrayLevelNonUniformityNormalized | log.sigma.2.0.mm.3D_glrIm_RunVariance | log.sigma.2.0.mm.3D_glrIm_GrayLevelNonUniformity |
|---------------------------------------------------|------------------------------------------------------------|---------------------------------------|--------------------------------------------------|
| 0.010233827                                       | 0.050461638                                                | 0.071744655                           | 33.6084532                                       |
| 0.005645643                                       | 0.067189115                                                | 0.208729041                           | 122.3483339                                      |
| 0.013674559                                       | 0.057232676                                                | 0.068254714                           | 23.45179833                                      |
| 0.003682399                                       | 0.044429282                                                | 0.071491496                           | 110.293493                                       |
| 0.007625583                                       | 0.059645961                                                | 0.063424122                           | 20.21550598                                      |
| 0.016240464                                       | 0.064100435                                                | 0.074210184                           | 38.60222105                                      |
| 0.006955401                                       | 0.092554042                                                | 0.086440355                           | 28.98277048                                      |
| 0.010611739                                       | 0.046919595                                                | 0.061997166                           | 44.52763974                                      |
| 0.006724625                                       | 0.047173419                                                | 0.067252394                           | 92.45949765                                      |
| 0.004244167                                       | 0.06523094                                                 | 0.103873765                           | 185.8663012                                      |
| 0.01312068                                        | 0.062947425                                                | 0.072126168                           | 48.83197262                                      |
| 0.004397457                                       | 0.055527372                                                | 0.083299711                           | 76.57581259                                      |
| 0.010762327                                       | 0.063559387                                                | 0.080642866                           | 122.8940438                                      |
| 0.01751553                                        | 0.061482655                                                | 0.085297412                           | 63.83552117                                      |
| 0.006543342                                       | 0.058697673                                                | 0.059971886                           | 50.68815916                                      |
| 0.005061321                                       | 0.123753761                                                | 0.340612695                           | 712.1897735                                      |
| 0.015421498                                       | 0.056611909                                                | 0.073991389                           | 37.06679979                                      |
| 0.011922402                                       | 0.059571279                                                | 0.108090531                           | 127.6499812                                      |
| 0.008646907                                       | 0.049500566                                                | 0.068958474                           | 27.21307587                                      |
| 0.006402877                                       | 0.078360411                                                | 0.217586266                           | 191.9465542                                      |
| 0.005246567                                       | 0.076204775                                                | 0.175030075                           | 355.1642771                                      |
| 0.009914058                                       | 0.054913682                                                | 0.067582222                           | 89.07277608                                      |
| 0.009209809                                       | 0.068108899                                                | 0.103155083                           | 71.5220949                                       |
| 0.006050712                                       | 0.055636494                                                | 0.053823298                           | 25.47703284                                      |
| 0.009612897                                       | 0.071273046                                                | 0.101078241                           | 78.98944482                                      |
| 0.005923647                                       | 0.052683182                                                | 0.087926362                           | 33.99763415                                      |
| 0.004123802                                       | 0.082292545                                                | 0.218283125                           | 249.1070571                                      |
| 0.008567847                                       | 0.064524361                                                | 0.088495998                           | 85.94453579                                      |
| 0.007591308                                       | 0.048524646                                                | 0.06513056                            | 80.96482509                                      |
| 0.008874381                                       | 0.071546196                                                | 0.222240591                           | 159.7508084                                      |
| 0.005498953                                       | 0.071089293                                                | 0.10795217                            | 207.9969992                                      |
| 0.011859692                                       | 0.074919819                                                | 0.142669961                           | 400.9023617                                      |
| 0.005248559                                       | 0.048694974                                                | 0.075675497                           | 92.70986309                                      |
| 0.017786344                                       | 0.068981669                                                | 0.044774201                           | 6.90291573                                       |
| 0.012815028                                       | 0.044896925                                                | 0.045179011                           | 14.27411774                                      |
| 0.007043614                                       | 0.057876561                                                | 0.081319917                           | 108.93661                                        |
| 0.009367043                                       | 0.053775939                                                | 0.112478335                           | 142.8231184                                      |
| 0.004100027                                       | 0.059299071                                                | 0.108256083                           | 183.124817                                       |
| 0.010022301                                       | 0.062442076                                                | 0.075792886                           | 48.6743576                                       |
| 0.007944889                                       | 0.052181014                                                | 0.078240872                           | 51.24402666                                      |
| 0.005425013                                       | 0.061213315                                                | 0.12084839                            | 82.286791                                        |
| 0.008748123                                       | 0.055117624                                                | 0.070927547                           | 49.29870627                                      |
| 0.00949299                                        | 0.055237915                                                | 0.076087119                           | 84.84298548                                      |
| 0.011889619                                       | 0.049255357                                                | 0.074245901                           | 47.35768238                                      |
| 0.009170992                                       | 0.0538535                                                  | 0.064129291                           | 95.51328774                                      |
| 0.018057185                                       | 0.073256794                                                | 0.118747177                           | 148.8632042                                      |
| 0.002515462                                       | 0.049708106                                                | 0.078423906                           | 198.4761739                                      |
| 0.0135523                                         | 0.054952427                                                | 0.057286954                           | 30.42119839                                      |
| 0.023066264                                       | 0.083349225                                                | 0.065702033                           | 10.53409401                                      |
| 0.008632022                                       | 0.058818849                                                | 0.059733755                           | 27.71392979                                      |
| 0.006288337                                       | 0.061899776                                                | 0.116091716                           | 194.2712806                                      |
| 0.013091772                                       | 0.05702399                                                 | 0.069691077                           | 44.31587728                                      |
| 0.002657156                                       | 0.055496635                                                | 0.117915471                           | 194.2299131                                      |
| 0.011816847                                       | 0.065086196                                                | 0.077054307                           | 35.90740606                                      |
| 0.005426611                                       | 0.085595336                                                | 0.218857011                           | 489.2193446                                      |
| 0.006960087                                       | 0.042340124                                                | 0.051322986                           | 35.55041981                                      |
| 0.00341704                                        | 0.04246884                                                 | 0.063523963                           | 88.10993167                                      |
| 0.006195688                                       | 0.055591251                                                | 0.063856874                           | 67.94331095                                      |
| 0.008061901                                       | 0.057907843                                                | 0.118196652                           | 43.08191619                                      |
| 0.004372553                                       | 0.072018483                                                | 0.09450779                            | 58.79595645                                      |
| 0.009204715                                       | 0.054335442                                                | 0.074881077                           | 107.876004                                       |
| 0.003239851                                       | 0.052336875                                                | 0.111939623                           | 263.9650138                                      |
| 0.004807916                                       | 0.08117775                                                 | 0.160957636                           | 224.3805771                                      |
| 0.001277147                                       | 0.083421266                                                | 0.296975376                           | 192.9070119                                      |
| 0.019779883                                       | 0.061331394                                                | 0.078404725                           | 12.45296277                                      |
| 0.010012271                                       | 0.053973925                                                | 0.072333777                           | 78.72378091                                      |
| 0.019595881                                       | 0.052515704                                                | 0.054529206                           | 19.71435918                                      |
| 0.003391927                                       | 0.051576701                                                | 0.088713929                           | 153.3043545                                      |
| 0.013231469                                       | 0.056383276                                                | 0.058969823                           | 23.8564589                                       |
| 0.00726718                                        | 0.050947207                                                | 0.077343519                           | 95.99298604                                      |
| 0.003681185                                       | 0.056485999                                                | 0.090163216                           | 159.4908463                                      |
| 0.009906499                                       | 0.056645774                                                | 0.08372202                            | 59.60533099                                      |
| 0.005087933                                       | 0.067314636                                                | 0.170192686                           | 311.8888361                                      |
| 0.005073663                                       | 0.077198413                                                | 0.174122191                           | 461.7279395                                      |
| 0.002629992                                       | 0.072809906                                                | 0.140359456                           | 601.4894586                                      |
| 0.008129                                          | 0.044221739                                                | 0.055417063                           | 46.93294138                                      |
| 0.013040722                                       | 0.054155881                                                | 0.07832267                            | 56.56897841                                      |
| 0.012193215                                       | 0.055266172                                                | 0.064968641                           | 31.77089021                                      |
| 0.011319277                                       | 0.052119949                                                | 0.074836686                           | 86.18062                                         |
| 0.006380924                                       | 0.055229294                                                | 0.088100449                           | 146.1807903                                      |
| 0.011819735                                       | 0.045233644                                                | 0.048115593                           | 21.81186274                                      |
| 0.004008378                                       | 0.039186193                                                | 0.045906682                           | 50.32202786                                      |
| 0.001336773                                       | 0.048812471                                                | 0.07543168                            | 128.0992792                                      |
| 0.016760075                                       | 0.064669948                                                | 0.057533176                           | 8.892759965                                      |
| 0.008664512                                       | 0.062996198                                                | 0.093334703                           | 197.9966955                                      |
| 0.002377828                                       | 0.079659935                                                | 0.166525137                           | 386.3753124                                      |
| 0.01612795                                        | 0.055284016                                                | 0.070061446                           | 40.48920209                                      |
| 0.005022181                                       | 0.051674261                                                | 0.062113674                           | 75.83035781                                      |
| 0.013296272                                       | 0.069591045                                                | 0.079830659                           | 11.88401974                                      |
| 0.039026232                                       | 0.081803346                                                | 0.047094857                           | 8.239250994                                      |
| 0.002342385                                       | 0.057679359                                                | 0.137925077                           | 208.2938921                                      |
| 0.005411167                                       | 0.044515522                                                | 0.053065264                           | 29.96568279                                      |
| 0.004706968                                       | 0.059197793                                                | 0.175103225                           | 54.33160016                                      |
| 0.004659369                                       | 0.062115503                                                | 0.132654233                           | 231.1050894                                      |
| 0.004943724                                       | 0.06827863                                                 | 0.132562587                           | 359.1529795                                      |
| 0.00753793                                        | 0.039417235                                                | 0.047586753                           | 9.555593674                                      |
| 0.006449115                                       | 0.060259044                                                | 0.085424736                           | 68.16119209                                      |
| 0.024867609                                       | 0.055027304                                                | 0.041410992                           | 6.515213369                                      |
| 0.012871079                                       | 0.068428098                                                | 0.071740157                           | 24.30499648                                      |
| 0.005704845                                       | 0.057816395                                                | 0.102324991                           | 43.04525089                                      |

| log.sigma.2.0.mm.3D_glrIm_LongRunEmphasis | log.sigma.2.0.mm.3D_glrIm_ShortRunHighGrayLevelEmphasis | log.sigma.2.0.mm.3D_glrIm_RunLengthNonUniformity | log.sigma.2.0.mm.3D_glrIm_ShortRunEmphasis |
|-------------------------------------------|---------------------------------------------------------|--------------------------------------------------|--------------------------------------------|
| 1.196332077                               | 257.397292                                              | 598.8328427                                      | 0.959080806                                |
| 1.515861357                               | 266.7121949                                             | 1454.926551                                      | 0.912752132                                |
| 1.192156574                               | 201.1863348                                             | 368.296425                                       | 0.958732185                                |
| 1.199034402                               | 467.9866951                                             | 2221.259924                                      | 0.957431562                                |
| 1.186465889                               | 326.9017861                                             | 303.4109793                                      | 0.957574293                                |
| 1.215475174                               | 149.8083512                                             | 531.2926635                                      | 0.952000128                                |
| 1.247774621                               | 328.6280596                                             | 272.8954505                                      | 0.946721346                                |
| 1.177446472                               | 262.4962131                                             | 856.1074223                                      | 0.960637376                                |
| 1.192915882                               | 308.389344                                              | 1752.304035                                      | 0.957241015                                |
| 1.287526182                               | 332.4911469                                             | 2440.68722                                       | 0.940554792                                |
| 1.211044462                               | 178.8670181                                             | 686.8200509                                      | 0.952919748                                |
| 1.239560891                               | 383.873315                                              | 1203.33721                                       | 0.947658653                                |
| 1.232258114                               | 175.4601713                                             | 1692.022686                                      | 0.948949442                                |
| 1.246115719                               | 151.2989374                                             | 902.4393116                                      | 0.946150768                                |
| 1.173370402                               | 299.7927168                                             | 779.2553088                                      | 0.960892851                                |
| 1.815112295                               | 229.3734871                                             | 4187.092265                                      | 0.876277037                                |
| 1.213513726                               | 189.2760035                                             | 580.1126999                                      | 0.953045886                                |
| 1.295313537                               | 171.7259845                                             | 1838.005884                                      | 0.940492693                                |
| 1.190606951                               | 310.7629785                                             | 494.6633781                                      | 0.959432448                                |
| 1.532622893                               | 207.5845349                                             | 1952.266453                                      | 0.9113506                                  |
| 1.43405726                                | 255.9700876                                             | 3834.91961                                       | 0.924495243                                |
| 1.193487906                               | 213.0929752                                             | 1450.294908                                      | 0.957099049                                |
| 1.281141781                               | 186.2244513                                             | 2171.431794                                      | 0.942846059                                |
| 1.159430276                               | 412.367608                                              | 416.4559187                                      | 0.963432096                                |
| 1.2833658                                 | 194.419288                                              | 950.483301                                       | 0.940831963                                |
| 1.245936611                               | 367.8036865                                             | 563.1899035                                      | 0.947886683                                |
| 1.534148764                               | 326.2318639                                             | 2397.824306                                      | 0.909860716                                |
| 1.248302534                               | 232.5416983                                             | 1162.446462                                      | 0.947592935                                |
| 1.187627288                               | 311.4837813                                             | 1503.006803                                      | 0.959020679                                |
| 1.525174862                               | 192.8625814                                             | 1795.448727                                      | 0.915527869                                |
| 1.290639041                               | 259.0272418                                             | 2514.689736                                      | 0.941703136                                |
| 1.37441828                                | 146.2070624                                             | 4454.904779                                      | 0.928995032                                |
| 1.217243295                               | 366.217584                                              | 1680.692251                                      | 0.952156544                                |
| 1.128685725                               | 383.1376613                                             | 92.9616683                                       | 0.971428481                                |
| 1.136958633                               | 309.3381504                                             | 292.0788595                                      | 0.967380958                                |
| 1.234618442                               | 244.0456216                                             | 1646.655102                                      | 0.948612623                                |
| 1.29104281                                | 224.0404418                                             | 2300.024082                                      | 0.944391432                                |
| 1.289207351                               | 351.1004227                                             | 2659.323338                                      | 0.942524228                                |
| 1.226918308                               | 233.4863107                                             | 683.5849014                                      | 0.948718661                                |
| 1.220252067                               | 278.655433                                              | 867.8228082                                      | 0.952656574                                |
| 1.325556466                               | 302.6631099                                             | 1137.823408                                      | 0.935683847                                |
| 1.207495042                               | 244.5270697                                             | 791.8509474                                      | 0.953367887                                |
| 1.221110835                               | 243.3622234                                             | 1353.337599                                      | 0.951142959                                |
| 1.211418974                               | 261.536968                                              | 851.622198                                       | 0.953693453                                |
| 1.186109152                               | 246.1981903                                             | 1589.722383                                      | 0.958214262                                |
| 1.325556783                               | 114.9539479                                             | 1718.938913                                      | 0.934844181                                |
| 1.221163062                               | 572.849437                                              | 3526.216472                                      | 0.95235235                                 |
| 1.166825232                               | 187.4171583                                             | 501.2184608                                      | 0.962139476                                |
| 1.195008627                               | 325.0095589                                             | 112.9913184                                      | 0.956120483                                |
| 1.17320288                                | 300.9043634                                             | 425.4526711                                      | 0.961015067                                |
| 1.30824528                                | 245.6253523                                             | 2680.711931                                      | 0.939233189                                |
| 1.203915532                               | 204.1775985                                             | 689.7505946                                      | 0.954177886                                |
| 1.312406041                               | 497.2245059                                             | 2990.461406                                      | 0.93909585                                 |
| 1.225391642                               | 172.1210845                                             | 483.5766318                                      | 0.949653327                                |
| 1.532962754                               | 240.3192537                                             | 4562.669924                                      | 0.91215258                                 |
| 1.148192624                               | 357.5939918                                             | 769.4436346                                      | 0.966554593                                |
| 1.182407091                               | 522.0211122                                             | 1867.595505                                      | 0.95952795                                 |
| 1.18493776                                | 403.1605015                                             | 1097.468142                                      | 0.958653575                                |
| 1.316818048                               | 266.2041592                                             | 632.6353617                                      | 0.937486929                                |
| 1.26233244                                | 533.6392408                                             | 709.3633085                                      | 0.945588667                                |
| 1.214633146                               | 244.9942565                                             | 1754.443103                                      | 0.952785819                                |
| 1.293693969                               | 436.2498986                                             | 4350.359861                                      | 0.942935411                                |
| 1.419546466                               | 279.3563219                                             | 2270.71545                                       | 0.92292634                                 |
| 1.700654365                               | 1128.563853                                             | 1758.00712                                       | 0.893376323                                |
| 1.224767023                               | 163.0299618                                             | 179.0441442                                      | 0.951223822                                |
| 1.208121564                               | 258.567567                                              | 1294.592664                                      | 0.954177767                                |
| 1.157304705                               | 246.7345261                                             | 342.3529449                                      | 0.964600516                                |
| 1.246899102                               | 428.9502587                                             | 2597.382063                                      | 0.948152021                                |
| 1.171583325                               | 228.4926459                                             | 382.5515274                                      | 0.961338763                                |
| 1.218061809                               | 291.3633502                                             | 1668.352343                                      | 0.953162303                                |
| 1.251352252                               | 383.2227054                                             | 2462.372911                                      | 0.94719219                                 |
| 1.235996843                               | 209.5838705                                             | 922.129325                                       | 0.949358655                                |
| 1.419830827                               | 269.6453136                                             | 3840.75317                                       | 0.927013894                                |
| 1.438489814                               | 255.5316607                                             | 4886.005692                                      | 0.921716851                                |
| 1.377609418                               | 465.8029228                                             | 6826.760542                                      | 0.926506377                                |
| 1.162083896                               | 349.216516                                              | 963.7015472                                      | 0.963064323                                |
| 1.22357552                                | 208.7768351                                             | 920.2653036                                      | 0.951225827                                |
| 1.19210762                                | 204.7670802                                             | 512.3140658                                      | 0.955992679                                |
| 1.215543387                               | 229.4511033                                             | 1462.957259                                      | 0.952612176                                |
| 1.245391904                               | 272.4410605                                             | 2313.877054                                      | 0.948366152                                |
| 1.142146538                               | 321.3338752                                             | 442.7149134                                      | 0.96720053                                 |
| 1.136889948                               | 542.800171                                              | 1179.849421                                      | 0.967788951                                |
| 1.209160088                               | 1155.662225                                             | 2338.825285                                      | 0.955694864                                |
| 1.172361947                               | 279.6549778                                             | 123.983787                                       | 0.960142513                                |
| 1.258702417                               | 197.3206672                                             | 2729.060678                                      | 0.945733091                                |
| 1.44363883                                | 484.3715487                                             | 3905.344198                                      | 0.916342014                                |
| 1.199961009                               | 189.5921253                                             | 653.610924                                       | 0.956265208                                |
| 1.182015676                               | 383.3694979                                             | 1318.206888                                      | 0.958828219                                |
| 1.237617333                               | 199.2688225                                             | 149.9855663                                      | 0.947609472                                |
| 1.136545259                               | 281.289128                                              | 92.98101509                                      | 0.968921144                                |
| 1.351951677                               | 783.9871618                                             | 3048.558364                                      | 0.934567698                                |
| 1.153520004                               | 414.0038371                                             | 614.4193946                                      | 0.965207459                                |
| 1.419467672                               | 369.3400734                                             | 766.9987332                                      | 0.930223966                                |
| 1.343889671                               | 300.0456532                                             | 3145.89876                                       | 0.93511333                                 |
| 1.353002475                               | 271.9667137                                             | 4403.957381                                      | 0.931522301                                |
| 1.138272469                               | 611.6105671                                             | 223.4586952                                      | 0.968633424                                |
| 1.242281516                               | 362.2647528                                             | 987.4137675                                      | 0.947913298                                |
| 1.121812366                               | 280.8081141                                             | 109.9752631                                      | 0.971757451                                |
| 1.211708411                               | 182.3591094                                             | 313.361041                                       | 0.952064968                                |
| 1.279562798                               | 339.6985867                                             | 642.7927168                                      | 0.943350547                                |

| log.sigma.2.0.mm.3D_glrIm_LongRunHighGrayLevelEmphasis | log.sigma.2.0.mm.3D_glrIm_RunPercentage | log.sigma.2.0.mm.3D_glrIm_LongRunLowGrayLevelEmphasis | log.sigma.2.0.mm.3D_glrIm_RunEntropy |
|--------------------------------------------------------|-----------------------------------------|-------------------------------------------------------|--------------------------------------|
| 309.3841244                                            | 0.943342776                             | 0.011598949                                           | 4.750934906                          |
| 425.6227178                                            | 0.876078664                             | 0.007876468                                           | 4.745129485                          |
| 235.3688149                                            | 0.943991492                             | 0.015571858                                           | 4.643148129                          |
| 576.590029                                             | 0.942081448                             | 0.004268693                                           | 4.994946875                          |
| 404.3007326                                            | 0.944075423                             | 0.008417641                                           | 4.607322069                          |
| 185.21991                                              | 0.936595287                             | 0.019070499                                           | 4.438914239                          |
| 440.4416315                                            | 0.929011641                             | 0.007696336                                           | 4.158165402                          |
| 317.7306485                                            | 0.947105788                             | 0.012137709                                           | 4.842241024                          |
| 379.897561                                             | 0.942797943                             | 0.007808458                                           | 4.880666111                          |
| 437.4792961                                            | 0.919675225                             | 0.005341477                                           | 4.651479584                          |
| 225.1824437                                            | 0.93795926                              | 0.015300945                                           | 4.454775767                          |
| 486.3328447                                            | 0.93055123                              | 0.005218271                                           | 4.788748268                          |
| 223.0024088                                            | 0.932275054                             | 0.012830394                                           | 4.525615402                          |
| 192.6913586                                            | 0.928718866                             | 0.02089798                                            | 4.551401488                          |
| 361.9308398                                            | 0.947901714                             | 0.007293615                                           | 4.587649013                          |
| 449.7996665                                            | 0.826621342                             | 0.008743436                                           | 4.368473501                          |
| 236.9161028                                            | 0.937954596                             | 0.017947002                                           | 4.614775343                          |
| 223.7706007                                            | 0.918821744                             | 0.015205266                                           | 4.663249427                          |
| 380.9661064                                            | 0.944620671                             | 0.009793182                                           | 4.786451662                          |
| 331.9138682                                            | 0.874028506                             | 0.009485004                                           | 4.489569477                          |
| 378.2081985                                            | 0.891948404                             | 0.007226494                                           | 4.556527342                          |
| 256.6803881                                            | 0.943023256                             | 0.011528923                                           | 4.691410842                          |
| 240.4116935                                            | 0.922091091                             | 0.01159448                                            | 4.519237047                          |
| 496.9441074                                            | 0.951863106                             | 0.006523481                                           | 4.692256031                          |
| 252.2515846                                            | 0.92039356                              | 0.011893225                                           | 4.506879503                          |
| 468.1350721                                            | 0.929727333                             | 0.006819291                                           | 4.819866837                          |
| 531.2175988                                            | 0.872941542                             | 0.005861299                                           | 4.537384684                          |
| 291.0101694                                            | 0.929357453                             | 0.010368379                                           | 4.628793443                          |
| 383.7588475                                            | 0.945391153                             | 0.008677354                                           | 4.804366087                          |
| 309.5112896                                            | 0.877655389                             | 0.012140651                                           | 4.685218852                          |
| 337.0243919                                            | 0.92019745                              | 0.007018282                                           | 4.521159352                          |
| 204.4005985                                            | 0.902166299                             | 0.015744525                                           | 4.483390522                          |
| 460.4700122                                            | 0.9364713                               | 0.006197659                                           | 4.874621608                          |
| 453.3991476                                            | 0.961538462                             | 0.018102365                                           | 4.424325818                          |
| 357.2693732                                            | 0.957599629                             | 0.013802779                                           | 4.82863063                           |
| 314.6810753                                            | 0.931797411                             | 0.008451566                                           | 4.609099064                          |
| 292.1918342                                            | 0.922008547                             | 0.011587789                                           | 4.828241781                          |
| 467.0322706                                            | 0.920668777                             | 0.005106557                                           | 4.687534317                          |
| 302.3531509                                            | 0.933578996                             | 0.011549947                                           | 4.547584739                          |
| 347.719352                                             | 0.936129647                             | 0.009184574                                           | 4.757027006                          |
| 420.6749972                                            | 0.911908987                             | 0.006691583                                           | 4.689311553                          |
| 306.4546086                                            | 0.938493825                             | 0.01020423                                            | 4.677046273                          |
| 310.64862                                              | 0.935350885                             | 0.01108307                                            | 4.690870286                          |
| 326.4482009                                            | 0.938011257                             | 0.013574404                                           | 4.861422901                          |
| 304.31787                                              | 0.944376178                             | 0.010360142                                           | 4.678239496                          |
| 151.720679                                             | 0.91175252                              | 0.023149192                                           | 4.406642139                          |
| 723.4594364                                            | 0.935915468                             | 0.002971907                                           | 4.897181114                          |
| 223.2753945                                            | 0.940597572                             | 0.015592617                                           | 4.567662851                          |
| 409.6752403                                            | 0.942594719                             | 0.025676521                                           | 4.298519859                          |
| 366.5936799                                            | 0.947995666                             | 0.009604403                                           | 4.650257699                          |
| 331.1394656                                            | 0.91653936                              | 0.007941327                                           | 4.662342841                          |
| 258.020954                                             | 0.939633522                             | 0.015254292                                           | 4.580819077                          |
| 682.0788779                                            | 0.91588992                              | 0.00337076                                            | 4.790128262                          |
| 216.2345304                                            | 0.933489522                             | 0.01393088                                            | 4.429834017                          |
| 387.4251855                                            | 0.874703711                             | 0.007980893                                           | 4.54526523                           |
| 419.9688413                                            | 0.955193839                             | 0.007671838                                           | 4.94965117                           |
| 630.4060366                                            | 0.946052124                             | 0.003951661                                           | 5.01658666                           |
| 500.9876347                                            | 0.94508894                              | 0.006888823                                           | 4.777528171                          |
| 364.2780854                                            | 0.913910414                             | 0.009622087                                           | 4.736136059                          |
| 693.6512536                                            | 0.926569458                             | 0.005220352                                           | 4.36190768                           |
| 302.7370217                                            | 0.936944132                             | 0.010671433                                           | 4.71845423                           |
| 586.4304864                                            | 0.920591457                             | 0.004048998                                           | 4.886683007                          |
| 415.6002646                                            | 0.893851133                             | 0.006480619                                           | 4.445485485                          |
| 2137.844143                                            | 0.845900346                             | 0.001847008                                           | 4.591345798                          |
| 197.2301829                                            | 0.935483871                             | 0.023716366                                           | 4.457475179                          |
| 317.5781751                                            | 0.939026202                             | 0.011644766                                           | 4.803543023                          |
| 296.3535896                                            | 0.952752831                             | 0.021530104                                           | 4.690901671                          |
| 551.6911592                                            | 0.929717764                             | 0.004143983                                           | 4.818101152                          |
| 274.2215484                                            | 0.948602967                             | 0.014544965                                           | 4.55329281                           |
| 362.5632536                                            | 0.936885591                             | 0.008460261                                           | 4.825533443                          |
| 490.663                                                | 0.928795547                             | 0.004554056                                           | 4.712398569                          |
| 266.3952495                                            | 0.932002453                             | 0.011907511                                           | 4.652003826                          |
| 397.0300792                                            | 0.896150869                             | 0.006947505                                           | 4.6543197                            |
| 386.2859574                                            | 0.890330783                             | 0.007026961                                           | 4.537459293                          |
| 681.7584731                                            | 0.899723479                             | 0.003475432                                           | 4.669504176                          |
| 419.5229625                                            | 0.950925556                             | 0.008989047                                           | 4.910750038                          |
| 263.8120896                                            | 0.935128435                             | 0.015266603                                           | 4.700034626                          |
| 242.2986608                                            | 0.942370744                             | 0.014235401                                           | 4.616162261                          |
| 285.0640071                                            | 0.937336473                             | 0.01313046                                            | 4.741109211                          |
| 347.5974078                                            | 0.930023244                             | 0.0077132                                             | 4.745749063                          |
| 373.7032663                                            | 0.956654457                             | 0.012601108                                           | 4.84962724                           |
| 633.8206092                                            | 0.957609132                             | 0.004394984                                           | 5.070805099                          |
| 1447.840064                                            | 0.93982808                              | 0.001533028                                           | 4.94998087                           |
| 349.3915585                                            | 0.94801061                              | 0.017613258                                           | 4.493536689                          |
| 253.2342409                                            | 0.9269106                               | 0.010739708                                           | 4.55631261                           |
| 742.0484802                                            | 0.885626791                             | 0.003335316                                           | 4.533545673                          |
| 227.2810386                                            | 0.9413684                               | 0.018320721                                           | 4.639124526                          |
| 472.3339489                                            | 0.945479778                             | 0.005765177                                           | 4.748063708                          |
| 263.7690064                                            | 0.932744851                             | 0.014755186                                           | 4.258979659                          |
| 338.2189655                                            | 0.958974359                             | 0.041909758                                           | 4.126424089                          |
| 1123.280168                                            | 0.908330914                             | 0.002803344                                           | 4.840700726                          |
| 478.4829019                                            | 0.953475703                             | 0.006024641                                           | 4.938294009                          |
| 550.8601184                                            | 0.897561343                             | 0.005982052                                           | 4.778530365                          |
| 421.9949633                                            | 0.909573068                             | 0.006004593                                           | 4.685911184                          |
| 378.7634691                                            | 0.90586661                              | 0.006557253                                           | 4.5795275                            |
| 713.032448                                             | 0.958041958                             | 0.007922841                                           | 5.062467561                          |
| 478.2802613                                            | 0.930161943                             | 0.007253907                                           | 4.67447036                           |
| 325.8582042                                            | 0.962476548                             | 0.027761877                                           | 4.550616867                          |
| 233.2917274                                            | 0.937081388                             | 0.01443618                                            | 4.417902242                          |
| 441.1394184                                            | 0.922409684                             | 0.006816475                                           | 4.817797851                          |

| log.sigma.2.0.mm.3D_gIrlm_HighGrayLevelRunEmphasis | log.sigma.2.0.mm.3D_gIrlm_RunLengthNonUniformityNormalized | log.sigma.2.0.mm.3D_gIrlm_GrayLevelVariance |
|----------------------------------------------------|------------------------------------------------------------|---------------------------------------------|
| 266.5957167                                        | 0.898755173                                                | 39.47503484                                 |
| 289.6940979                                        | 0.798241041                                                | 34.03530774                                 |
| 207.2722249                                        | 0.898123005                                                | 42.00923783                                 |
| 487.2445925                                        | 0.894454884                                                | 48.81375329                                 |
| 341.2940288                                        | 0.894661059                                                | 36.33624082                                 |
| 156.3549793                                        | 0.88165069                                                 | 23.23927296                                 |
| 348.2530631                                        | 0.870515756                                                | 25.36752954                                 |
| 272.5461241                                        | 0.901810312                                                | 42.41381091                                 |
| 321.362775                                         | 0.893711196                                                | 40.73646005                                 |
| 350.6403463                                        | 0.856092214                                                | 34.52175132                                 |
| 187.3003913                                        | 0.884361259                                                | 24.37872966                                 |
| 402.4420674                                        | 0.871921906                                                | 43.79123376                                 |
| 184.1357122                                        | 0.87462611                                                 | 26.07437247                                 |
| 158.7472128                                        | 0.868506082                                                | 25.23294491                                 |
| 311.3062476                                        | 0.902166189                                                | 31.45704277                                 |
| 258.6574164                                        | 0.726834215                                                | 29.10035711                                 |
| 198.1049937                                        | 0.884825184                                                | 29.36340511                                 |
| 180.622896                                         | 0.856701234                                                | 28.94391821                                 |
| 322.9315468                                        | 0.899310624                                                | 39.27937053                                 |
| 225.4828957                                        | 0.795671449                                                | 21.92999506                                 |
| 274.1221182                                        | 0.822346311                                                | 30.73634119                                 |
| 221.0583621                                        | 0.893532048                                                | 33.65224163                                 |
| 195.4916967                                        | 0.861545517                                                | 25.60387973                                 |
| 428.0350727                                        | 0.908716626                                                | 40.885136                                   |
| 204.5101362                                        | 0.856969766                                                | 31.03148497                                 |
| 385.3747935                                        | 0.872406323                                                | 43.98448294                                 |
| 355.9271284                                        | 0.791582691                                                | 29.16697588                                 |
| 242.8302687                                        | 0.872079018                                                | 35.45258431                                 |
| 324.4853203                                        | 0.899211719                                                | 37.69449187                                 |
| 208.9167971                                        | 0.803725554                                                | 34.9868755                                  |
| 272.1839284                                        | 0.858960263                                                | 29.2434239                                  |
| 155.6463983                                        | 0.831604508                                                | 23.35443914                                 |
| 383.3172381                                        | 0.882177436                                                | 42.05175694                                 |
| 395.8884529                                        | 0.92855393                                                 | 49.32813544                                 |
| 318.5393502                                        | 0.917988627                                                | 45.43971333                                 |
| 256.8912555                                        | 0.874153275                                                | 28.56714355                                 |
| 235.1513056                                        | 0.865399431                                                | 41.62249757                                 |
| 370.4370433                                        | 0.860738322                                                | 32.74918642                                 |
| 246.2034833                                        | 0.875200963                                                | 26.39020992                                 |
| 290.9089517                                        | 0.883342909                                                | 36.67398258                                 |
| 322.1305464                                        | 0.84576036                                                 | 35.71106005                                 |
| 256.0029064                                        | 0.884802882                                                | 32.34945694                                 |
| 255.4605457                                        | 0.880225042                                                | 31.4736253                                  |
| 273.2961361                                        | 0.885479737                                                | 42.63105314                                 |
| 256.7820824                                        | 0.896011821                                                | 31.89043511                                 |
| 121.1857762                                        | 0.844600774                                                | 22.49615824                                 |
| 599.6740429                                        | 0.88268516                                                 | 43.39996445                                 |
| 193.8683226                                        | 0.905119518                                                | 27.37456747                                 |
| 340.4900521                                        | 0.89276207                                                 | 43.97736733                                 |
| 312.9441649                                        | 0.902647272                                                | 38.75541858                                 |
| 259.8298086                                        | 0.853538172                                                | 30.09142983                                 |
| 214.135272                                         | 0.886862543                                                | 30.74124719                                 |
| 527.6640072                                        | 0.85358212                                                 | 35.38697191                                 |
| 180.2690922                                        | 0.876166454                                                | 22.26129608                                 |
| 261.350484                                         | 0.797554641                                                | 28.55275164                                 |
| 369.031704                                         | 0.915985861                                                | 49.33194246                                 |
| 541.8071995                                        | 0.899454476                                                | 49.62689413                                 |
| 421.0268251                                        | 0.897373013                                                | 44.77461905                                 |
| 282.5050923                                        | 0.849819775                                                | 38.00794078                                 |
| 561.5064867                                        | 0.867836433                                                | 22.3178155                                  |
| 255.666452                                         | 0.883385957                                                | 34.93250946                                 |
| 460.934621                                         | 0.861971843                                                | 42.13320053                                 |
| 300.620321                                         | 0.819811189                                                | 25.82478                                    |
| 1262.265284                                        | 0.759564525                                                | 30.96876902                                 |
| 169.2515354                                        | 0.880607376                                                | 24.71396503                                 |
| 269.2472301                                        | 0.886978665                                                | 41.20883958                                 |
| 255.6611536                                        | 0.911425601                                                | 40.4683043                                  |
| 450.4980931                                        | 0.873298256                                                | 35.46435367                                 |
| 236.8069344                                        | 0.903602894                                                | 29.90226221                                 |
| 304.1342311                                        | 0.88482199                                                 | 39.66714426                                 |
| 402.0825606                                        | 0.871253448                                                | 32.1760715                                  |
| 219.739887                                         | 0.875855518                                                | 30.17599243                                 |
| 288.5736761                                        | 0.827954933                                                | 31.38948132                                 |
| 275.3295958                                        | 0.816212195                                                | 26.52078376                                 |
| 501.1153346                                        | 0.825837165                                                | 37.93774506                                 |
| 362.3244507                                        | 0.907553699                                                | 44.87081887                                 |
| 218.623038                                         | 0.880250691                                                | 31.72315125                                 |
| 211.9809507                                        | 0.890708225                                                | 30.79546768                                 |
| 239.5482191                                        | 0.883661446                                                | 34.92702369                                 |
| 285.6279085                                        | 0.873708946                                                | 36.385536                                   |
| 331.1865577                                        | 0.917546848                                                | 49.54366667                                 |
| 560.1478008                                        | 0.918514861                                                | 58.36235183                                 |
| 1206.912526                                        | 0.890663286                                                | 50.53432098                                 |
| 292.5698566                                        | 0.900935705                                                | 38.8677686                                  |
| 207.2314394                                        | 0.867651272                                                | 25.41450352                                 |
| 525.4897677                                        | 0.804549865                                                | 31.28701816                                 |
| 196.3950907                                        | 0.891815779                                                | 32.47569247                                 |
| 399.819225                                         | 0.897716647                                                | 36.61429536                                 |
| 210.6320312                                        | 0.874854244                                                | 19.50138504                                 |
| 291.6967088                                        | 0.922302502                                                | 40.44827586                                 |
| 837.5179089                                        | 0.843611632                                                | 42.60401536                                 |
| 426.0350497                                        | 0.912503065                                                | 56.82633956                                 |
| 395.468895                                         | 0.835252153                                                | 37.734203                                   |
| 319.4541068                                        | 0.844796817                                                | 32.35946082                                 |
| 289.5046351                                        | 0.836682546                                                | 27.98829113                                 |
| 630.4620229                                        | 0.921281824                                                | 79.45470925                                 |
| 382.9865946                                        | 0.872512911                                                | 37.23989689                                 |
| 289.2206025                                        | 0.928496275                                                | 37.18962191                                 |
| 191.8206549                                        | 0.881772376                                                | 24.85865595                                 |
| 356.8610981                                        | 0.862787929                                                | 53.29196885                                 |

| log.sigma.2.0.mm.3D_glszm_SmallAreaHighGrayLevelEmphasis | log.sigma.2.0.mm.3D_glszm_GrayLevelNonUniformityNormalized | log.sigma.2.0.mm.3D_glszm_SizeZoneNonUniformityNormalized |
|----------------------------------------------------------|------------------------------------------------------------|-----------------------------------------------------------|
| 209.5185389                                              | 0.045516184                                                | 0.417164661                                               |
| 224.3924883                                              | 0.048081501                                                | 0.378630324                                               |
| 195.3099756                                              | 0.0468107                                                  | 0.495498971                                               |
| 360.4190459                                              | 0.040030505                                                | 0.429290262                                               |
| 220.1974038                                              | 0.049210921                                                | 0.376364153                                               |
| 115.5796686                                              | 0.059693878                                                | 0.410688776                                               |
| 188.3285965                                              | 0.060310088                                                | 0.368895567                                               |
| 193.7488901                                              | 0.042748855                                                | 0.413785923                                               |
| 220.2242379                                              | 0.043189798                                                | 0.391326358                                               |
| 294.0718098                                              | 0.048113365                                                | 0.447176179                                               |
| 123.1424922                                              | 0.057469344                                                | 0.353737178                                               |
| 338.0225902                                              | 0.042997421                                                | 0.467584557                                               |
| 117.0973728                                              | 0.054925255                                                | 0.33657319                                                |
| 118.772672                                               | 0.05589642                                                 | 0.374247589                                               |
| 224.8927036                                              | 0.050243757                                                | 0.434651697                                               |
| 214.7053584                                              | 0.056204955                                                | 0.386370971                                               |
| 145.9752721                                              | 0.051993334                                                | 0.412920486                                               |
| 138.410741                                               | 0.051317295                                                | 0.328550448                                               |
| 224.6270001                                              | 0.045844894                                                | 0.40109511                                                |
| 173.3670955                                              | 0.060789091                                                | 0.348288892                                               |
| 234.8221003                                              | 0.051382922                                                | 0.445338215                                               |
| 174.2422292                                              | 0.048431341                                                | 0.396276238                                               |
| 153.8341431                                              | 0.05429649                                                 | 0.394204548                                               |
| 297.1869706                                              | 0.04576                                                    | 0.451904                                                  |
| 174.5876534                                              | 0.052302774                                                | 0.425600242                                               |
| 316.3838102                                              | 0.044958753                                                | 0.433842986                                               |
| 272.6420016                                              | 0.053020933                                                | 0.381901108                                               |
| 214.341895                                               | 0.047437313                                                | 0.454129326                                               |
| 213.9745621                                              | 0.044956202                                                | 0.398462989                                               |
| 182.116491                                               | 0.047811535                                                | 0.422151358                                               |
| 238.2224964                                              | 0.052725967                                                | 0.420635488                                               |
| 122.0860462                                              | 0.05746497                                                 | 0.343782099                                               |
| 285.8048516                                              | 0.04319175                                                 | 0.418633836                                               |
| 284.7588029                                              | 0.050568055                                                | 0.579416351                                               |
| 241.0152833                                              | 0.044427648                                                | 0.451359144                                               |
| 159.7117537                                              | 0.051645103                                                | 0.324141924                                               |
| 199.167924                                               | 0.042823667                                                | 0.402039974                                               |
| 268.4940759                                              | 0.049162304                                                | 0.399090086                                               |
| 153.3381548                                              | 0.054944488                                                | 0.344536081                                               |
| 229.8691645                                              | 0.046635842                                                | 0.431959503                                               |
| 238.4183466                                              | 0.047538595                                                | 0.40496156                                                |
| 173.1110981                                              | 0.049247885                                                | 0.38208862                                                |
| 166.5213159                                              | 0.049409763                                                | 0.359545373                                               |
| 195.7406931                                              | 0.043021305                                                | 0.385097754                                               |
| 172.9873217                                              | 0.048392603                                                | 0.403951103                                               |
| 104.6297774                                              | 0.059854523                                                | 0.389296983                                               |
| 437.1802239                                              | 0.042380254                                                | 0.418360579                                               |
| 135.6984358                                              | 0.053984645                                                | 0.38535359                                                |
| 244.5265977                                              | 0.055671176                                                | 0.470863684                                               |
| 212.7132083                                              | 0.048263224                                                | 0.42910454                                                |
| 197.7495435                                              | 0.050262549                                                | 0.386667606                                               |
| 137.8942203                                              | 0.051674594                                                | 0.357543929                                               |
| 365.7245451                                              | 0.046912506                                                | 0.374633016                                               |
| 127.4311337                                              | 0.061422414                                                | 0.37039239                                                |
| 201.6969752                                              | 0.052573727                                                | 0.381004637                                               |
| 280.7956857                                              | 0.039502222                                                | 0.451939346                                               |
| 394.5398556                                              | 0.040060113                                                | 0.421619442                                               |
| 272.651034                                               | 0.042985982                                                | 0.412955157                                               |
| 216.9917441                                              | 0.04644901                                                 | 0.416288643                                               |
| 421.8242521                                              | 0.06544353                                                 | 0.416380887                                               |
| 196.223161                                               | 0.047352623                                                | 0.392771769                                               |
| 334.6190986                                              | 0.043326933                                                | 0.402869499                                               |
| 223.2597717                                              | 0.056655066                                                | 0.377145871                                               |
| 832.6291261                                              | 0.053364234                                                | 0.398150026                                               |
| 149.9709303                                              | 0.061672968                                                | 0.42084121                                                |
| 206.4101875                                              | 0.044333252                                                | 0.407399078                                               |
| 183.0252004                                              | 0.045626245                                                | 0.456880566                                               |
| 322.6277853                                              | 0.047229239                                                | 0.372112335                                               |
| 169.6010823                                              | 0.05367281                                                 | 0.398943139                                               |
| 231.6937475                                              | 0.044128622                                                | 0.419355611                                               |
| 308.2734184                                              | 0.04844594                                                 | 0.420386334                                               |
| 154.5446863                                              | 0.052082207                                                | 0.378518118                                               |
| 224.6873408                                              | 0.049764809                                                | 0.386932742                                               |
| 209.355363                                               | 0.05454122                                                 | 0.387324609                                               |
| 360.6564741                                              | 0.046930409                                                | 0.410582274                                               |
| 247.9907304                                              | 0.041125949                                                | 0.421765756                                               |
| 157.7913578                                              | 0.050176177                                                | 0.415561219                                               |
| 171.0329222                                              | 0.051451035                                                | 0.421898485                                               |
| 176.191395                                               | 0.046765634                                                | 0.405244578                                               |
| 224.1288282                                              | 0.046178765                                                | 0.408437728                                               |
| 275.7594167                                              | 0.04033677                                                 | 0.488615778                                               |
| 415.823592                                               | 0.036589032                                                | 0.471586429                                               |
| 875.9237189                                              | 0.039782899                                                | 0.441925676                                               |
| 145.7440918                                              | 0.048209366                                                | 0.380165289                                               |
| 152.1954194                                              | 0.05455752                                                 | 0.367641053                                               |
| 392.0430192                                              | 0.053779261                                                | 0.385532972                                               |
| 171.9023921                                              | 0.051271342                                                | 0.455678439                                               |
| 245.3664044                                              | 0.047242453                                                | 0.374995457                                               |
| 137.6956395                                              | 0.07132964                                                 | 0.376731302                                               |
| 174.0581883                                              | 0.064803805                                                | 0.440546968                                               |
| 559.149076                                               | 0.044394867                                                | 0.390490454                                               |
| 361.816526                                               | 0.038307596                                                | 0.463239111                                               |
| 292.4501243                                              | 0.045727084                                                | 0.420604153                                               |
| 241.3867638                                              | 0.049261706                                                | 0.403311549                                               |
| 226.3030151                                              | 0.053521623                                                | 0.391329867                                               |
| 476.1387083                                              | 0.034998423                                                | 0.481464799                                               |
| 225.0388433                                              | 0.046464824                                                | 0.361987047                                               |
| 196.3636806                                              | 0.049382716                                                | 0.427083333                                               |
| 106.6401724                                              | 0.056519357                                                | 0.325876552                                               |
| 317.0374521                                              | 0.040566883                                                | 0.455437404                                               |

| log.sigma.2.0.mm.3D_glszm_SizeZoneNonUniformity | log.sigma.2.0.mm.3D_glszm_GrayLevelNonUniformity | log.sigma.2.0.mm.3D_glszm_LargeAreaEmphasis | log.sigma.2.0.mm.3D_glszm_ZoneVariance |
|-------------------------------------------------|--------------------------------------------------|---------------------------------------------|----------------------------------------|
| 136.412844                                      | 14.88379205                                      | 12.95412844                                 | 8.292755006                            |
| 230.2072368                                     | 29.23355263                                      | 221.4786184                                 | 209.8087534                            |
| 107.0277778                                     | 10.11111111                                      | 9.981481481                                 | 5.944358711                            |
| 534.8956661                                     | 49.87800963                                      | 17.50481541                                 | 13.03257487                            |
| 59.08917197                                     | 7.726114655                                      | 11.47133758                                 | 6.24268733                             |
| 114.9928571                                     | 16.71428571                                      | 16.79642857                                 | 11.52284439                            |
| 44.63636364                                     | 7.297520661                                      | 22.66942149                                 | 14.91250598                            |
| 202.755102                                      | 20.94693878                                      | 9.857142857                                 | 5.675535194                            |
| 370.5860612                                     | 40.90073918                                      | 11.85955649                                 | 7.039978412                            |
| 494.5768535                                     | 53.21338156                                      | 98.15370705                                 | 90.30762993                            |
| 122.3930636                                     | 19.88439306                                      | 13.61560694                                 | 7.902678005                            |
| 265.5880282                                     | 24.42253521                                      | 40.99295775                                 | 34.1852683                             |
| 264.8831004                                     | 43.22617535                                      | 27.8043202                                  | 20.85938754                            |
| 162.7977011                                     | 24.31494253                                      | 25.57701149                                 | 18.97152068                            |
| 189.9427918                                     | 21.95652174                                      | 9.974828375                                 | 5.628986904                            |
| 516.1916168                                     | 75.08982036                                      | 3790.09506                                  | 3763.056617                            |
| 124.7019868                                     | 15.70198675                                      | 13.08609272                                 | 7.744177887                            |
| 257.9121019                                     | 40.28407643                                      | 35.4955414                                  | 26.67047913                            |
| 104.6858238                                     | 11.96551724                                      | 12.4137931                                  | 7.441405734                            |
| 230.9155354                                     | 40.30316742                                      | 338.4027149                                 | 320.5543203                            |
| 755.7389511                                     | 87.19681791                                      | 497.7371833                                 | 488.2607992                            |
| 313.0582278                                     | 38.26075949                                      | 11.98481013                                 | 7.244544144                            |
| 391.4451158                                     | 53.9164149                                       | 65.42497482                                 | 57.86109007                            |
| 112.976                                         | 11.44                                            | 7.46                                        | 3.758224                               |
| 192.7969095                                     | 23.69315673                                      | 59.00662252                                 | 51.94252689                            |
| 125.3806228                                     | 12.99307958                                      | 21.83391003                                 | 16.06726452                            |
| 352.8766234                                     | 48.99134199                                      | 422.8225108                                 | 408.7518928                            |
| 267.4821732                                     | 27.94057725                                      | 39.11544992                                 | 33.19626659                            |
| 331.1227437                                     | 37.35860409                                      | 10.90132371                                 | 6.390172628                            |
| 323.7900913                                     | 36.6714472                                       | 277.5932203                                 | 266.6092244                            |
| 490.0403433                                     | 61.42575107                                      | 90.60343348                                 | 83.15732764                            |
| 623.6207277                                     | 104.2414553                                      | 121.2392503                                 | 110.5527667                            |
| 375.9331849                                     | 38.78619154                                      | 17.85857461                                 | 12.73324165                            |
| 38.82089552                                     | 3.388059701                                      | 4                                           | 1.590554689                            |
| 85.30687831                                     | 8.396825397                                      | 5.619047619                                 | 2.533355729                            |
| 244.7271523                                     | 38.99205298                                      | 18.18543046                                 | 11.02714793                            |
| 447.8725314                                     | 47.70556553                                      | 33.502693                                   | 26.81902923                            |
| 495.6698873                                     | 61.05958132                                      | 55.73268921                                 | 48.44008028                            |
| 117.4868035                                     | 18.73607038                                      | 13.23460411                                 | 7.23856864                             |
| 193.5178571                                     | 20.89285714                                      | 19.55133929                                 | 14.06863341                            |
| 205.7204724                                     | 24.1496063                                       | 69.49606299                                 | 61.07692665                            |
| 155.8921569                                     | 20.09313725                                      | 14.77696078                                 | 9.321072424                            |
| 238.3785822                                     | 32.7586727                                       | 16.05429864                                 | 9.920644995                            |
| 164.0516432                                     | 18.40375587                                      | 16.06338028                                 | 10.27404726                            |
| 357.9006772                                     | 42.87584655                                      | 10.86004515                                 | 6.367176393                            |
| 290.4155496                                     | 44.65147453                                      | 105.5924933                                 | 96.67274256                            |
| 796.9769029                                     | 80.7343832                                       | 25.51076115                                 | 20.49598281                            |
| 104.8161765                                     | 14.68382353                                      | 9.606617647                                 | 5.012529736                            |
| 29.19354839                                     | 3.451612903                                      | 15.83870968                                 | 11.16753382                            |
| 105.1306122                                     | 11.8244898                                       | 8.069387755                                 | 3.954285714                            |
| 491.841195                                      | 63.93396226                                      | 55.28144654                                 | 48.03553064                            |
| 124.4252874                                     | 17.98275862                                      | 14.13505747                                 | 8.487605694                            |
| 525.6101212                                     | 65.81824661                                      | 57.28795438                                 | 49.87077584                            |
| 85.93103448                                     | 14.25                                            | 20.59913793                                 | 14.1098209                             |
| 631.3246832                                     | 87.11466506                                      | 1123.195534                                 | 1107.698459                            |
| 211.0556745                                     | 18.44753747                                      | 8.764453961                                 | 5.221675554                            |
| 456.1922366                                     | 43.28650647                                      | 10.87523105                                 | 6.767303822                            |
| 250.2508251                                     | 26.04950495                                      | 10.90924092                                 | 6.356721563                            |
| 137.7915408                                     | 15.37462236                                      | 37.02114804                                 | 30.97341207                            |
| 134.9074074                                     | 21.2037037                                       | 38.99691358                                 | 31.60321407                            |
| 337.7837209                                     | 40.72325581                                      | 24.57093023                                 | 18.9986344                             |
| 845.2202097                                     | 90.89990467                                      | 83.14680648                                 | 76.32918182                            |
| 334.1512415                                     | 50.19638826                                      | 241.006772                                  | 228.8435253                            |
| 250.0382166                                     | 33.51273885                                      | 698.6576433                                 | 679.7462245                            |
| 38.7173913                                      | 5.673913043                                      | 13.72826087                                 | 8.16481569                             |
| 282.3275613                                     | 30.72294372                                      | 17.45887446                                 | 12.43687754                            |
| 95.48803828                                     | 9.535885167                                      | 7.253588517                                 | 3.699732149                            |
| 453.9770492                                     | 57.61967213                                      | 28.60409836                                 | 21.73712107                            |
| 85.37383178                                     | 11.48598131                                      | 9.046728972                                 | 4.70320552                             |
| 363.5813149                                     | 38.25951557                                      | 19.16839677                                 | 13.7883513                             |
| 498.1578059                                     | 57.40843882                                      | 31.4278481                                  | 24.84656661                            |
| 162.7627907                                     | 22.39534884                                      | 29.14186047                                 | 22.2481828                             |
| 608.2582697                                     | 78.2302799                                       | 152.851145                                  | 142.0432797                            |
| 725.846318                                      | 102.2102455                                      | 288.5688367                                 | 275.7253719                            |
| 1214.502366                                     | 138.8201487                                      | 519.5280595                                 | 509.8966683                            |
| 237.8758865                                     | 23.19503546                                      | 7.65248227                                  | 3.737135959                            |
| 197.3915789                                     | 23.8368421                                       | 18.71368421                                 | 13.18376066                            |
| 117.7096774                                     | 14.35483871                                      | 17.21146953                                 | 12.43121234                            |
| 306.7701453                                     | 35.4015852                                       | 20.73976222                                 | 15.30969254                            |
| 459.4924444                                     | 51.95111111                                      | 32.42133333                                 | 26.02155773                            |
| 135.3465704                                     | 11.1732852                                       | 7.119133574                                 | 3.80857303                             |
| 359.8204456                                     | 27.91743119                                      | 5.80733945                                  | 2.718406511                            |
| 571.4098995                                     | 51.43928848                                      | 18.18406806                                 | 13.52140773                            |
| 25.09090909                                     | 3.181818182                                      | 9.651515152                                 | 4.824839302                            |
| 456.2425463                                     | 67.70588235                                      | 35.31103948                                 | 27.84462635                            |
| 553.6253482                                     | 77.2270195                                       | 514.8662953                                 | 500.3245009                            |
| 157.6647399                                     | 17.73988439                                      | 26.75722543                                 | 21.70122624                            |
| 271.1217151                                     | 34.15629322                                      | 10.29875519                                 | 5.690814935                            |
| 28.63157895                                     | 5.421052632                                      | 13.51315789                                 | 7.715200831                            |
| 25.55172414                                     | 3.75862069                                       | 6.431034483                                 | 3.153686088                            |
| 551.3725212                                     | 62.68555241                                      | 156.1494334                                 | 148.2243312                            |
| 173.7146667                                     | 14.36533333                                      | 6.922666667                                 | 3.378232889                            |
| 166.9798489                                     | 18.15365239                                      | 57.5163728                                  | 50.8893147                             |
| 563.0229226                                     | 68.76934097                                      | 96.06446991                                 | 87.48074523                            |
| 687.9579067                                     | 94.09101251                                      | 192.3105802                                 | 181.4033037                            |
| 71.73825503                                     | 5.214765101                                      | 5.577181208                                 | 2.694022792                            |
| 163.9801325                                     | 21.04856512                                      | 26.1192053                                  | 18.91359541                            |
| 30.75                                           | 3.555555556                                      | 4.125                                       | 1.206597222                            |
| 48.22972973                                     | 8.364864865                                      | 15.56081081                                 | 9.003058802                            |
| 149.8389058                                     | 13.34650456                                      | 30.29483283                                 | 24.27817555                            |

| log.sigma.2.0.mm.3D_glszm_ZonePercentage | log.sigma.2.0.mm.3D_glszm_LargeAreaLowGrayLevelEmphasis | log.sigma.2.0.mm.3D_glszm_LargeAreaHighGrayLevelEmphasis | log.sigma.2.0.mm.3D_glszm_HighGrayLevelZoneEmphasis |
|------------------------------------------|---------------------------------------------------------|----------------------------------------------------------|-----------------------------------------------------|
| 0.463172805                              | 0.10289781                                              | 2471.538226                                              | 302.9663609                                         |
| 0.292729899                              | 0.875756745                                             | 58004.34211                                              | 334.8980263                                         |
| 0.497695853                              | 0.110765309                                             | 1395.615741                                              | 252.3935185                                         |
| 0.472865275                              | 0.04955508                                              | 7454.043339                                              | 515.5609952                                         |
| 0.437325905                              | 0.051961847                                             | 3915.56051                                               | 344.4840764                                         |
| 0.435458787                              | 0.233739422                                             | 1883.639286                                              | 173.3892857                                         |
| 0.359050445                              | 0.072961768                                             | 8584.380165                                              | 316.6198347                                         |
| 0.489021956                              | 0.087976292                                             | 2231.083673                                              | 286.0285714                                         |
| 0.455507456                              | 0.066231303                                             | 3414.92925                                               | 334.3864836                                         |
| 0.357004519                              | 0.374020579                                             | 26968.39241                                              | 409.3607595                                         |
| 0.418379686                              | 0.138740483                                             | 2345.289017                                              | 195.7919075                                         |
| 0.383265857                              | 0.138033383                                             | 13624.76056                                              | 460.3679577                                         |
| 0.379459981                              | 0.260009422                                             | 3925.94028                                               | 196.1994917                                         |
| 0.389087657                              | 0.424549829                                             | 2566.949425                                              | 180.708046                                          |
| 0.479692645                              | 0.046613368                                             | 2893.089245                                              | 324.2036613                                         |
| 0.192313229                              | 16.4395558                                              | 878620.7635                                              | 314.0681138                                         |
| 0.432664756                              | 0.152885768                                             | 2439.294702                                              | 209.5629139                                         |
| 0.336620926                              | 0.387238189                                             | 4686.040764                                              | 218.2955414                                         |
| 0.448453608                              | 0.082551388                                             | 3259.509579                                              | 341.5862069                                         |
| 0.236701178                              | 1.844395966                                             | 66114.14781                                              | 276.0030166                                         |
| 0.324846861                              | 2.200250228                                             | 114600.1544                                              | 326.8520919                                         |
| 0.459302326                              | 0.100602843                                             | 2117.392405                                              | 253.5924051                                         |
| 0.363603076                              | 0.522079043                                             | 9099.617321                                              | 231.7995972                                         |
| 0.51975052                               | 0.026945549                                             | 3168.804                                                 | 428.66                                              |
| 0.376245847                              | 0.402965242                                             | 9524.399558                                              | 244.0110375                                         |
| 0.416426513                              | 0.090418951                                             | 6597.33564                                               | 439.017301                                          |
| 0.266589729                              | 1.329332449                                             | 136950.9556                                              | 406.6363636                                         |
| 0.41102582                               | 0.24622448                                              | 7041.142615                                              | 293.0305603                                         |
| 0.47082153                               | 0.060207662                                             | 3524.649819                                              | 327.8002407                                         |
| 0.301730921                              | 1.478716956                                             | 54179.89179                                              | 252.6166884                                         |
| 0.366467443                              | 0.440823787                                             | 19416.35451                                              | 330.4223176                                         |
| 0.305902192                              | 1.175903266                                             | 13925.05954                                              | 187.8555678                                         |
| 0.441711756                              | 0.070124554                                             | 6071.325167                                              | 412.1213808                                         |
| 0.644230769                              | 0.032527541                                             | 1718.402985                                              | 373.8656716                                         |
| 0.569277108                              | 0.050046553                                             | 1492.84127                                               | 336.7830688                                         |
| 0.373762376                              | 0.113286771                                             | 4307.484768                                              | 267.9761589                                         |
| 0.386805556                              | 0.237463596                                             | 6152.239677                                              | 280.927289                                          |
| 0.370304114                              | 0.190680171                                             | 17568.94928                                              | 404.9098229                                         |
| 0.408383234                              | 0.086292709                                             | 3420.73607                                               | 247.4486804                                         |
| 0.427073403                              | 0.123884563                                             | 4798.779018                                              | 322.8727679                                         |
| 0.344640434                              | 0.250620043                                             | 20768.05118                                              | 350.4940945                                         |
| 0.428121721                              | 0.105130105                                             | 3184.294118                                              | 267.9117647                                         |
| 0.403775883                              | 0.106849559                                             | 4192.874811                                              | 262.8989442                                         |
| 0.415609756                              | 0.134828418                                             | 3709.666667                                              | 292.4342723                                         |
| 0.471778488                              | 0.072914892                                             | 2616.097065                                              | 261.3137698                                         |
| 0.334829443                              | 1.529861422                                             | 8288.4437                                                | 152.3217158                                         |
| 0.446554149                              | 0.05113333                                              | 13912.89764                                              | 631.8635171                                         |
| 0.466552316                              | 0.117472735                                             | 1569.136029                                              | 207.25                                              |
| 0.462686567                              | 0.12308152                                              | 5718.854839                                              | 335.7258065                                         |
| 0.492957746                              | 0.047272018                                             | 2566.24898                                               | 311.8816327                                         |
| 0.371495327                              | 0.272010073                                             | 12383.82547                                              | 293.745283                                          |
| 0.420798065                              | 0.141262264                                             | 3035.307471                                              | 217.8333333                                         |
| 0.367181366                              | 0.12560527                                              | 27773.07128                                              | 562.6179615                                         |
| 0.392554992                              | 0.217568994                                             | 2775.581897                                              | 201.2672414                                         |
| 0.254024222                              | 4.935826036                                             | 258770.1141                                              | 302.8479179                                         |
| 0.531285552                              | 0.045401075                                             | 2704.053533                                              | 390.117773                                          |
| 0.493388053                              | 0.036020536                                             | 4664.914048                                              | 572.4380776                                         |
| 0.468677494                              | 0.040550932                                             | 4749.737624                                              | 411.6930693                                         |
| 0.406633907                              | 0.168400584                                             | 9348.861027                                              | 307.6223565                                         |
| 0.367763905                              | 0.099118389                                             | 18289.66358                                              | 613.9783951                                         |
| 0.405851817                              | 0.187096211                                             | 4319.402326                                              | 290.7093023                                         |
| 0.382986491                              | 0.214442936                                             | 33839.94948                                              | 494.4556721                                         |
| 0.286731392                              | 0.927310428                                             | 64218.15124                                              | 339.6264108                                         |
| 0.229952398                              | 0.561200623                                             | 875487.8455                                              | 1281.176752                                         |
| 0.423963134                              | 0.229559933                                             | 1763.543478                                              | 203.75                                              |
| 0.446233097                              | 0.111406769                                             | 3958.408369                                              | 300.4978355                                         |
| 0.530456853                              | 0.084601232                                             | 1875.07177                                               | 258.9138756                                         |
| 0.381607757                              | 0.086310763                                             | 11144.64508                                              | 495.1098361                                         |
| 0.479820628                              | 0.083606265                                             | 1837.817757                                              | 252.9439252                                         |
| 0.431128792                              | 0.106036974                                             | 4625.303345                                              | 334.4209919                                         |
| 0.389802632                              | 0.113341713                                             | 10068.05992                                              | 449.6109705                                         |
| 0.380868025                              | 0.270673218                                             | 4502.732558                                              | 242.3186047                                         |
| 0.304179567                              | 0.644122367                                             | 38549.23601                                              | 336.8829517                                         |
| 0.27903514                               | 1.20351518                                              | 71407.64888                                              | 316.6467449                                         |
| 0.322222222                              | 1.067971137                                             | 254960.2708                                              | 530.9939148                                         |
| 0.505376344                              | 0.045233534                                             | 2605.005319                                              | 367.4680851                                         |
| 0.425246195                              | 0.180901614                                             | 3165.968421                                              | 232.6463158                                         |
| 0.457377049                              | 0.196350448                                             | 2176.62724                                               | 248.437276                                          |
| 0.429138322                              | 0.16853282                                              | 3631.433289                                              | 262.4306473                                         |
| 0.395291637                              | 0.173848511                                             | 7166.083556                                              | 322.8524444                                         |
| 0.549603175                              | 0.052787706                                             | 1972.068592                                              | 363.6137184                                         |
| 0.568978374                              | 0.018363109                                             | 2966.454784                                              | 576.6854522                                         |
| 0.463108883                              | 0.017390058                                             | 20882.19644                                              | 1248.561485                                         |
| 0.455172414                              | 0.065116825                                             | 3117.287879                                              | 253.0900901                                         |
| 0.365968741                              | 0.285641789                                             | 5355.382756                                              | 236.4246575                                         |
| 0.262235208                              | 1.09734393                                              | 244676.2702                                              | 589.2137883                                         |
| 0.444730077                              | 0.327818121                                             | 2900.109827                                              | 235.8265896                                         |
| 0.465850515                              | 0.04763752                                              | 3684.897649                                              | 398.9294606                                         |
| 0.415300546                              | 0.096429679                                             | 3028.552632                                              | 211.1052632                                         |
| 0.552380952                              | 0.11928345                                              | 2235.275862                                              | 265.4482759                                         |
| 0.355220126                              | 0.198267811                                             | 126172.4207                                              | 861.325779                                          |
| 0.531161473                              | 0.029834777                                             | 2414.074667                                              | 479.9786667                                         |
| 0.388454012                              | 0.167777113                                             | 21039.84383                                              | 419.7052897                                         |
| 0.341320293                              | 0.348490372                                             | 28323.15473                                              | 353.1439828                                         |
| 0.302790217                              | 0.825917158                                             | 47035.41638                                              | 339.6774744                                         |
| 0.588932806                              | 0.022393412                                             | 3200.926174                                              | 648.3892617                                         |
| 0.372532895                              | 0.081495926                                             | 10786.11258                                              | 368.1103753                                         |
| 0.585365854                              | 0.08588588                                              | 1274.111111                                              | 283.0694444                                         |
| 0.390501319                              | 0.116776586                                             | 3012.135135                                              | 188.2837838                                         |
| 0.407682776                              | 0.113730252                                             | 9247.644377                                              | 423.7082067                                         |

| log.sigma.2.0.mm.3D_glszm_SmallAreaEmphasis | log.sigma.2.0.mm.3D_glszm_LowGrayLevelZoneEmphasis | log.sigma.2.0.mm.3D_glszm_ZoneEntropy | log.sigma.2.0.mm.3D_glszm_SmallAreaLowGrayLevelEmphasis |
|---------------------------------------------|----------------------------------------------------|---------------------------------------|---------------------------------------------------------|
| 0.668760399                                 | 0.013846512                                        | 6.099021868                           | 0.011790578                                             |
| 0.638925999                                 | 0.007191351                                        | 6.302441351                           | 0.005272908                                             |
| 0.730250827                                 | 0.017065622                                        | 5.738687819                           | 0.014799938                                             |
| 0.681085102                                 | 0.004330977                                        | 6.498197448                           | 0.003314023                                             |
| 0.636592983                                 | 0.011553942                                        | 6.00764551                            | 0.0098482                                               |
| 0.664851812                                 | 0.019977485                                        | 5.740330026                           | 0.015601797                                             |
| 0.629715561                                 | 0.013093601                                        | 5.596307197                           | 0.011744879                                             |
| 0.666510286                                 | 0.012218542                                        | 6.164536227                           | 0.00871359                                              |
| 0.648602288                                 | 0.007911933                                        | 6.463025763                           | 0.005751724                                             |
| 0.695526734                                 | 0.004885496                                        | 6.252203792                           | 0.003723358                                             |
| 0.612380159                                 | 0.015872422                                        | 6.001939962                           | 0.010505832                                             |
| 0.710588                                    | 0.005794473                                        | 6.234636309                           | 0.004817846                                             |
| 0.597906932                                 | 0.013577285                                        | 6.353660727                           | 0.009874096                                             |
| 0.634178647                                 | 0.022928763                                        | 6.096690387                           | 0.017969045                                             |
| 0.68525796                                  | 0.008676764                                        | 6.058471882                           | 0.007255613                                             |
| 0.645300448                                 | 0.006012893                                        | 6.365085417                           | 0.004162453                                             |
| 0.667895001                                 | 0.019581205                                        | 5.980954921                           | 0.015175968                                             |
| 0.592469107                                 | 0.013376149                                        | 6.504029446                           | 0.008961943                                             |
| 0.657275742                                 | 0.011260099                                        | 6.053803984                           | 0.008644746                                             |
| 0.609014062                                 | 0.007376924                                        | 6.177113043                           | 0.005172669                                             |
| 0.693870172                                 | 0.005947662                                        | 6.119067325                           | 0.004433369                                             |
| 0.650377788                                 | 0.011436535                                        | 6.226018176                           | 0.008565944                                             |
| 0.650936235                                 | 0.010345693                                        | 6.154277758                           | 0.007331326                                             |
| 0.697764228                                 | 0.008485302                                        | 5.93459626                            | 0.007429856                                             |
| 0.676978804                                 | 0.010630828                                        | 6.009632784                           | 0.006352567                                             |
| 0.684794915                                 | 0.0084905                                          | 6.064703526                           | 0.007203663                                             |
| 0.641436645                                 | 0.005712823                                        | 6.301080948                           | 0.004366549                                             |
| 0.700892281                                 | 0.009461363                                        | 6.098813728                           | 0.006246738                                             |
| 0.654681331                                 | 0.009367536                                        | 6.330254754                           | 0.007174993                                             |
| 0.675711078                                 | 0.011418117                                        | 6.233917191                           | 0.008463531                                             |
| 0.673956572                                 | 0.005820783                                        | 6.200666747                           | 0.004108558                                             |
| 0.60716098                                  | 0.013626022                                        | 6.434991718                           | 0.008946251                                             |
| 0.672770145                                 | 0.005706987                                        | 6.416176559                           | 0.003561602                                             |
| 0.78778296                                  | 0.025253223                                        | 5.166616616                           | 0.024635672                                             |
| 0.697064163                                 | 0.016406491                                        | 5.780910467                           | 0.014137346                                             |
| 0.587012082                                 | 0.008705036                                        | 6.452095943                           | 0.006241879                                             |
| 0.658753835                                 | 0.010707142                                        | 6.502304966                           | 0.007762008                                             |
| 0.655432216                                 | 0.00494346                                         | 6.349502284                           | 0.003714764                                             |
| 0.60753292                                  | 0.013807144                                        | 6.17841877                            | 0.010797077                                             |
| 0.683343123                                 | 0.01049098                                         | 6.151995984                           | 0.008632739                                             |
| 0.660927455                                 | 0.007563766                                        | 6.197470177                           | 0.005979685                                             |
| 0.641348214                                 | 0.010776492                                        | 6.202264753                           | 0.008009609                                             |
| 0.621965626                                 | 0.012181456                                        | 6.395251676                           | 0.008915058                                             |
| 0.642490613                                 | 0.016621641                                        | 6.320926521                           | 0.013070864                                             |
| 0.65945484                                  | 0.01144622                                         | 6.22312793                            | 0.008758941                                             |
| 0.64799253                                  | 0.020861542                                        | 6.026178355                           | 0.014010734                                             |
| 0.67204199                                  | 0.002972643                                        | 6.531795165                           | 0.002261058                                             |
| 0.643850327                                 | 0.015412901                                        | 5.852690758                           | 0.011407136                                             |
| 0.708875349                                 | 0.027607862                                        | 5.097431545                           | 0.013772017                                             |
| 0.681215                                    | 0.011587479                                        | 5.980066779                           | 0.009701761                                             |
| 0.645259849                                 | 0.007153901                                        | 6.393156268                           | 0.005131708                                             |
| 0.616697981                                 | 0.01550224                                         | 6.058309965                           | 0.010536782                                             |
| 0.634278444                                 | 0.003128511                                        | 6.500439453                           | 0.002264504                                             |
| 0.629071346                                 | 0.015046192                                        | 5.783399034                           | 0.011742262                                             |
| 0.641383352                                 | 0.006113432                                        | 6.450956758                           | 0.004140028                                             |
| 0.698185071                                 | 0.008445842                                        | 6.204847514                           | 0.006763735                                             |
| 0.674123005                                 | 0.003936563                                        | 6.489648884                           | 0.003013916                                             |
| 0.667907612                                 | 0.008448337                                        | 6.369278436                           | 0.006890747                                             |
| 0.670548678                                 | 0.010945671                                        | 6.098892555                           | 0.008331229                                             |
| 0.670991971                                 | 0.005039083                                        | 5.824270192                           | 0.002105795                                             |
| 0.651051756                                 | 0.012504941                                        | 6.339383283                           | 0.01027206                                              |
| 0.659644142                                 | 0.003760656                                        | 6.592633392                           | 0.002741407                                             |
| 0.63803236                                  | 0.006397452                                        | 6.311846768                           | 0.004975387                                             |
| 0.656032329                                 | 0.002483096                                        | 6.228391806                           | 0.002197335                                             |
| 0.671847203                                 | 0.025614616                                        | 5.286254413                           | 0.021153373                                             |
| 0.662139405                                 | 0.011605431                                        | 6.333118715                           | 0.007700262                                             |
| 0.701428429                                 | 0.023406435                                        | 5.85511054                            | 0.016310518                                             |
| 0.633135973                                 | 0.003825684                                        | 6.51329893                            | 0.002720558                                             |
| 0.65171241                                  | 0.01885527                                         | 5.808898019                           | 0.016413381                                             |
| 0.673397107                                 | 0.009116609                                        | 6.381895287                           | 0.006963727                                             |
| 0.674034195                                 | 0.004017426                                        | 6.292294468                           | 0.002983979                                             |
| 0.635026362                                 | 0.012069604                                        | 6.137897532                           | 0.009210623                                             |
| 0.64641631                                  | 0.005888442                                        | 6.461079508                           | 0.004269846                                             |
| 0.645929906                                 | 0.005872569                                        | 6.352143928                           | 0.004177841                                             |
| 0.665850097                                 | 0.003213761                                        | 6.523629946                           | 0.002383753                                             |
| 0.674735984                                 | 0.010491                                           | 6.299046523                           | 0.008586993                                             |
| 0.669860434                                 | 0.015795719                                        | 6.097922852                           | 0.010730656                                             |
| 0.674105045                                 | 0.014546248                                        | 5.838098174                           | 0.011826895                                             |
| 0.660920428                                 | 0.01415912                                         | 6.275110439                           | 0.0103154                                               |
| 0.663924995                                 | 0.007386031                                        | 6.352777108                           | 0.005328326                                             |
| 0.726505766                                 | 0.016270011                                        | 5.917553997                           | 0.014790843                                             |
| 0.71387544                                  | 0.004787885                                        | 6.347678384                           | 0.003926201                                             |
| 0.691465827                                 | 0.001744399                                        | 6.513935362                           | 0.001454162                                             |
| 0.638260459                                 | 0.028969491                                        | 5.309101316                           | 0.025822145                                             |
| 0.628910021                                 | 0.009768461                                        | 6.326985156                           | 0.006897876                                             |
| 0.644588726                                 | 0.002862469                                        | 6.409270129                           | 0.002107251                                             |
| 0.70166379                                  | 0.022050268                                        | 5.895460297                           | 0.019120997                                             |
| 0.631679124                                 | 0.005922516                                        | 6.273764739                           | 0.004374973                                             |
| 0.631618001                                 | 0.021230227                                        | 5.064396765                           | 0.01852539                                              |
| 0.686466963                                 | 0.048552579                                        | 4.926272374                           | 0.033919771                                             |
| 0.64870936                                  | 0.003903067                                        | 6.573587675                           | 0.003427572                                             |
| 0.70749389                                  | 0.006611704                                        | 6.225252877                           | 0.005500678                                             |
| 0.670314529                                 | 0.006490623                                        | 6.116304893                           | 0.005240143                                             |
| 0.660381164                                 | 0.005510973                                        | 6.413467394                           | 0.00403109                                              |
| 0.648588963                                 | 0.005618368                                        | 6.350569398                           | 0.004095912                                             |
| 0.719656765                                 | 0.010354608                                        | 5.809295199                           | 0.009311815                                             |
| 0.623741065                                 | 0.010700217                                        | 6.334729433                           | 0.009046675                                             |
| 0.676481481                                 | 0.022550658                                        | 5.372923918                           | 0.008459663                                             |
| 0.584483803                                 | 0.0196699                                          | 5.823138988                           | 0.015591674                                             |
| 0.701481885                                 | 0.007552128                                        | 6.112693529                           | 0.00622827                                              |



| log.sigma.2.0.mm.3D_ngtdm_Coarseness | log.sigma.2.0.mm.3D_ngtdm_Complexity | log.sigma.2.0.mm.3D_ngtdm_Strength | log.sigma.2.0.mm.3D_ngtdm_Busyness | log.sigma.2.0.mm.3D_ngtdm_Contrast |
|--------------------------------------|--------------------------------------|------------------------------------|------------------------------------|------------------------------------|
| 0.009143109                          | 1.867733677                          | 2.595718877                        | 0.290368822                        | 0.000379009                        |
| 0.004334549                          | 0.484341913                          | 1.237353444                        | 0.401928955                        | 5.38E-05                           |
| 0.013986168                          | 3.166931387                          | 4.525078754                        | 0.204803907                        | 0.000624088                        |
| 0.002750859                          | 0.936395795                          | 1.245373927                        | 0.434105985                        | 8.05E-05                           |
| 0.019658825                          | 2.884874463                          | 6.066541378                        | 0.091359668                        | 0.000516226                        |
| 0.00943303                           | 0.925305926                          | 1.524653623                        | 0.449908502                        | 0.000355888                        |
| 0.016491476                          | 1.872104576                          | 3.99564722                         | 0.111785294                        | 0.000424686                        |
| 0.005857692                          | 1.396992691                          | 1.70054635                         | 0.425157777                        | 0.000361102                        |
| 0.0034913                            | 0.834005131                          | 1.292956691                        | 0.486926703                        | 9.73E-05                           |
| 0.002312423                          | 0.497906774                          | 1.010400626                        | 0.586549123                        | 3.58E-05                           |
| 0.006809066                          | 0.793425515                          | 1.138193272                        | 0.517255447                        | 0.000316856                        |
| 0.004787043                          | 1.308492801                          | 2.10287584                         | 0.268986011                        | 0.000101067                        |
| 0.003259236                          | 0.484385366                          | 0.99735597                         | 0.772440021                        | 6.40E-05                           |
| 0.005963717                          | 0.690537476                          | 1.308915817                        | 0.572212082                        | 0.000164966                        |
| 0.007410956                          | 1.397704217                          | 2.207092657                        | 0.238195674                        | 0.000181177                        |
| 0.00126057                           | 0.155823039                          | 0.906171382                        | 0.905373444                        | 4.22E-06                           |
| 0.00887037                           | 1.326319106                          | 2.153269387                        | 0.323860116                        | 0.000344061                        |
| 0.003255528                          | 0.365966337                          | 0.807436031                        | 0.987150807                        | 7.02E-05                           |
| 0.012162079                          | 2.008762632                          | 3.335632587                        | 0.175349789                        | 0.000459488                        |
| 0.003139391                          | 0.208338646                          | 0.623729124                        | 0.75146745                         | 3.10E-05                           |
| 0.001458142                          | 0.217550802                          | 0.494944234                        | 1.097885305                        | 1.73E-05                           |
| 0.004088455                          | 0.17886395                           | 1.229261278                        | 0.601081326                        | 0.000107708                        |
| 0.002664389                          | 0.312220357                          | 0.653861042                        | 0.995173071                        | 4.97E-05                           |
| 0.012980915                          | 3.139077094                          | 4.212857336                        | 0.113709141                        | 0.000506772                        |
| 0.005603851                          | 1.058759633                          | 2.231027836                        | 0.376769837                        | 0.000103574                        |
| 0.010221248                          | 2.511657749                          | 3.796650449                        | 0.148533813                        | 0.000271638                        |
| 0.002334482                          | 0.295958193                          | 0.884781029                        | 0.56330074                         | 1.99E-05                           |
| 0.004862593                          | 0.992034865                          | 1.786553635                        | 0.395411673                        | 0.000105049                        |
| 0.003497373                          | 0.821482964                          | 1.058376373                        | 0.562473247                        | 0.000167112                        |
| 0.003369134                          | 0.438418767                          | 1.202287478                        | 0.565268467                        | 3.92E-05                           |
| 0.002203151                          | 0.459594952                          | 0.993730144                        | 0.702643522                        | 3.08E-05                           |
| 0.001395582                          | 0.122147681                          | 0.390738504                        | 1.954554868                        | 1.49E-05                           |
| 0.003342945                          | 1.09647383                           | 1.596895888                        | 0.392025755                        | 8.60E-05                           |
| 0.040766014                          | 13.01274505                          | 15.77598167                        | 0.041005958                        | 0.003907321                        |
| 0.017397434                          | 4.510905516                          | 4.629953884                        | 0.130852546                        | 0.001309056                        |
| 0.003398249                          | 0.500336869                          | 0.915376026                        | 0.644965861                        | 8.16E-05                           |
| 0.002408941                          | 0.602171339                          | 1.000730623                        | 0.884024709                        | 6.61E-05                           |
| 0.002154276                          | 0.385532214                          | 0.685912836                        | 0.725252299                        | 4.05E-05                           |
| 0.007350217                          | 1.006215447                          | 1.601883564                        | 0.336497061                        | 0.00025463                         |
| 0.006179927                          | 1.29442532                           | 1.896994095                        | 0.335039541                        | 0.000208796                        |
| 0.00519168                           | 0.791224946                          | 1.489929374                        | 0.335531224                        | 9.50E-05                           |
| 0.006736286                          | 1.145172449                          | 1.879714994                        | 0.345763539                        | 0.000233423                        |
| 0.003636412                          | 0.700520667                          | 1.003835577                        | 0.161642789                        | 0.000144382                        |
| 0.006668591                          | 1.499860386                          | 2.227374043                        | 0.300065668                        | 0.000228281                        |
| 0.003358277                          | 0.611195536                          | 0.846113076                        | 0.684470664                        | 0.00012194                         |
| 0.003049223                          | 0.281313928                          | 0.621080874                        | 1.420783962                        | 6.42E-05                           |
| 0.001690577                          | 0.652700093                          | 0.977486926                        | 0.512603512                        | 3.25E-05                           |
| 0.009898948                          | 1.458188806                          | 1.948692175                        | 0.386018849                        | 0.000540381                        |
| 0.03386056                           | 7.84055537                           | 12.52915941                        | 0.049055515                        | 0.002114869                        |
| 0.012447958                          | 2.68934543                           | 4.091332344                        | 0.142756824                        | 0.000479752                        |
| 0.002231951                          | 0.351244337                          | 0.697722929                        | 0.828054472                        | 3.52E-05                           |
| 0.006099201                          | 1.124886955                          | 1.320092099                        | 0.498644963                        | 0.000442063                        |
| 0.001984518                          | 0.510561216                          | 0.97698187                         | 0.511586742                        | 2.92E-05                           |
| 0.01122424                           | 0.980938577                          | 1.796287551                        | 0.346891038                        | 0.000334809                        |
| 0.001419038                          | 0.15696529                           | 0.565832384                        | 1.054464295                        | 9.89E-06                           |
| 0.007232119                          | 2.549299767                          | 2.780158254                        | 0.231201311                        | 0.000343065                        |
| 0.002904414                          | 1.50944609                           | 1.842921407                        | 0.328435051                        | 9.48E-05                           |
| 0.005043681                          | 1.380126462                          | 2.019243532                        | 0.2429947                          | 0.000165287                        |
| 0.009536563                          | 1.439976502                          | 2.635996355                        | 0.195284422                        | 0.000199436                        |
| 0.007872822                          | 0.929746348                          | 2.318700282                        | 0.187302013                        | 0.000132103                        |
| 0.003139948                          | 0.601600744                          | 0.956190879                        | 0.733442163                        | 9.42E-05                           |
| 0.001390729                          | 0.410930943                          | 0.754294743                        | 0.760542768                        | 2.31E-05                           |
| 0.002727059                          | 0.31062046                           | 0.929111509                        | 0.522836329                        | 2.00E-05                           |
| 0.003206699                          | 0.380175848                          | 1.568184018                        | 0.230299014                        | 2.78E-05                           |
| 0.02952472                           | 2.693433673                          | 4.736262815                        | 0.139137008                        | 0.001198295                        |
| 0.005200022                          | 1.147358926                          | 2.097137204                        | 0.320674576                        | 0.000104901                        |
| 0.013236551                          | 3.449774514                          | 3.567990307                        | 0.172269264                        | 0.000922653                        |
| 0.002205897                          | 0.630924891                          | 1.107989226                        | 0.530353807                        | 4.24E-05                           |
| 0.013012631                          | 2.00819771                           | 2.831999132                        | 0.218885417                        | 0.000611478                        |
| 0.003613547                          | 0.802198707                          | 1.246266388                        | 0.51402556                         | 9.67E-05                           |
| 0.002335795                          | 0.410179389                          | 0.712690291                        | 0.761297819                        | 5.84E-05                           |
| 0.005685737                          | 0.881842301                          | 1.473600408                        | 0.469618851                        | 0.000186327                        |
| 0.001587315                          | 0.229195318                          | 0.536358394                        | 0.997655707                        | 1.83E-05                           |
| 0.001208625                          | 0.166145478                          | 0.45156526                         | 1.236912269                        | 1.07E-05                           |
| 0.000893082                          | 0.211924931                          | 0.538747511                        | 0.914858447                        | 7.26E-06                           |
| 0.005535955                          | 1.59298808                           | 1.811246096                        | 0.32345892                         | 0.000294518                        |
| 0.005721568                          | 1.124271094                          | 1.707532267                        | 0.417358718                        | 0.0001873                          |
| 0.009045127                          | 1.753436288                          | 2.116407225                        | 0.378738119                        | 0.000498793                        |
| 0.003666628                          | 0.646646056                          | 0.930350784                        | 0.725845069                        | 0.000139276                        |
| 0.002309426                          | 0.67803169                           | 1.069311161                        | 0.682841727                        | 5.23E-05                           |
| 0.01114573                           | 3.46734907                           | 3.698089662                        | 0.188571797                        | 0.000761646                        |
| 0.004523482                          | 2.320160079                          | 2.277523632                        | 0.250394914                        | 0.000245279                        |
| 0.002847601                          | 1.127343065                          | 1.792326359                        | 0.200348702                        | 5.33E-05                           |
| 0.044482591                          | 6.208686763                          | 11.29356675                        | 0.046861734                        | 0.001834124                        |
| 0.002043355                          | 0.265994742                          | 0.501569748                        | 1.325466147                        | 4.47E-05                           |
| 0.001422254                          | 0.333218339                          | 1.13025448                         | 0.53391185                         | 8.14E-06                           |
| 0.008280147                          | 1.17015924                           | 1.870902558                        | 0.407535177                        | 0.000325044                        |
| 0.00359836                           | 0.886805509                          | 1.182195045                        | 0.477066885                        | 0.000196417                        |
| 0.031616456                          | 2.473579264                          | 4.24398744                         | 0.129337796                        | 0.001357663                        |
| 0.027735579                          | 9.214825968                          | 8.181368274                        | 0.090794107                        | 0.007031853                        |
| 0.002012753                          | 0.630538437                          | 1.374343431                        | 0.325973111                        | 2.42E-05                           |
| 0.008709354                          | 3.759167292                          | 4.131673056                        | 0.175009424                        | 0.000423976                        |
| 0.007655095                          | 1.105568633                          | 1.851498209                        | 0.216456193                        | 0.000181172                        |
| 0.001836638                          | 0.369246471                          | 0.751736093                        | 0.762376322                        | 2.44E-05                           |
| 0.001291264                          | 0.208640354                          | 0.475660578                        | 1.194687523                        | 1.49E-05                           |
| 0.021153474                          | 12.07680568                          | 10.81522944                        | 0.059540266                        | 0.002167042                        |
| 0.005990123                          | 1.090776009                          | 2.1216564                          | 0.225974279                        | 0.000115936                        |
| 0.043586638                          | 8.624483645                          | 11.04171309                        | 0.053994447                        | 0.003105658                        |
| 0.019434922                          | 1.562291437                          | 3.727801513                        | 0.149021694                        | 0.000394484                        |
| 0.009099122                          | 2.427803917                          | 4.13117952                         | 0.156078203                        | 0.000225466                        |

| log.sigma.1.5.mm.3D_gldm_GrayLevelVariance | log.sigma.1.5.mm.3D_gldm_HighGrayLevelEmphasis | log.sigma.1.5.mm.3D_gldm_GrayLevelNonUniformityNormalized | log.sigma.1.5.mm.3D_gldm_DependenceEntropy |
|--------------------------------------------|------------------------------------------------|-----------------------------------------------------------|--------------------------------------------|
| 32.12966359                                | 303.1657224                                    | 0.051830125                                               | 6.422947213                                |
| 18.46360939                                | 395.9677419                                    | 0.088234878                                               | 6.702778347                                |
| 33.15591752                                | 214.2258065                                    | 0.058389433                                               | 6.201996792                                |
| 40.85255684                                | 614.4686907                                    | 0.04631234                                                | 6.73109449                                 |
| 20.75730325                                | 237.1504178                                    | 0.070413793                                               | 6.049426502                                |
| 19.54741697                                | 277.7418351                                    | 0.063584626                                               | 6.239539136                                |
| 15.68577693                                | 390.6884273                                    | 0.093625901                                               | 5.800549843                                |
| 34.67954809                                | 374.7175649                                    | 0.049019725                                               | 6.426059083                                |
| 28.97905924                                | 397.1611352                                    | 0.052924166                                               | 6.522590363                                |
| 23.18467245                                | 433.1752744                                    | 0.069045358                                               | 6.504005426                                |
| 18.71002984                                | 220.0616687                                    | 0.065581369                                               | 6.17577523                                 |
| 32.81198767                                | 781.9163293                                    | 0.057470574                                               | 6.586721874                                |
| 17.52850068                                | 206.6639344                                    | 0.068890771                                               | 6.322557061                                |
| 17.20409881                                | 177.7996422                                    | 0.068823384                                               | 6.324682956                                |
| 22.94972895                                | 376.1503842                                    | 0.061438378                                               | 6.250282348                                |
| 10.5029258                                 | 284.959119                                     | 0.171672402                                               | 6.339899042                                |
| 21.02171575                                | 172.5444126                                    | 0.060869779                                               | 6.252927653                                |
| 17.94819559                                | 260.7572899                                    | 0.069577862                                               | 6.508818133                                |
| 26.61783635                                | 311.5429553                                    | 0.057450904                                               | 6.287271533                                |
| 11.59636005                                | 223.0542663                                    | 0.103162651                                               | 6.558769318                                |
| 17.67915355                                | 385.8870597                                    | 0.089132441                                               | 6.497518257                                |
| 23.75951731                                | 416.8593023                                    | 0.060361682                                               | 6.386152483                                |
| 15.92867039                                | 251.7777371                                    | 0.080934806                                               | 6.434239949                                |
| 31.62582285                                | 386.1767152                                    | 0.055744054                                               | 6.228999288                                |
| 18.80742693                                | 184.0921927                                    | 0.07594287                                                | 6.363918486                                |
| 28.08711973                                | 392.4899135                                    | 0.058355272                                               | 6.454297053                                |
| 15.15648444                                | 518.7484132                                    | 0.095696585                                               | 6.588474293                                |
| 23.53177933                                | 385.9385904                                    | 0.072245335                                               | 6.43756426                                 |
| 31.22102907                                | 352.7586402                                    | 0.050224623                                               | 6.52052124                                 |
| 17.64560467                                | 274.5149489                                    | 0.096235641                                               | 6.628016001                                |
| 18.83027666                                | 246.5278389                                    | 0.079122279                                               | 6.354599657                                |
| 11.78481182                                | 172.6895447                                    | 0.093591906                                               | 6.417565187                                |
| 32.78102407                                | 419.7845548                                    | 0.050494195                                               | 6.689112158                                |
| 33.99029216                                | 322.6634615                                    | 0.074149408                                               | 5.287622862                                |
| 38.76128611                                | 353.7168675                                    | 0.047539556                                               | 6.147729227                                |
| 19.78201034                                | 288.2064356                                    | 0.062776198                                               | 6.379948471                                |
| 29.57453692                                | 331.9600694                                    | 0.063430507                                               | 6.697099005                                |
| 23.82233524                                | 730.5989863                                    | 0.062496955                                               | 6.569283607                                |
| 17.90954713                                | 209.0443114                                    | 0.068682276                                               | 6.240655754                                |
| 28.74172415                                | 443.3241182                                    | 0.054184793                                               | 6.485882056                                |
| 22.80460639                                | 362.2489824                                    | 0.069769262                                               | 6.638010428                                |
| 23.76336504                                | 289.1490031                                    | 0.058263021                                               | 6.37478402                                 |
| 25.35863694                                | 359.6114495                                    | 0.055556709                                               | 6.420929573                                |
| 29.64973611                                | 304.2712195                                    | 0.053696609                                               | 6.458420156                                |
| 26.43060361                                | 479.0686901                                    | 0.05576197                                                | 6.463316359                                |
| 16.68683924                                | 196.220377                                     | 0.077636028                                               | 6.334963397                                |
| 34.74018092                                | 919.6980778                                    | 0.051147122                                               | 6.699979417                                |
| 25.5435451                                 | 321.6432247                                    | 0.056586121                                               | 6.334301063                                |
| 22.21792159                                | 237.6940299                                    | 0.095121408                                               | 5.422104538                                |
| 27.36445231                                | 497.3903421                                    | 0.059750859                                               | 6.208916952                                |
| 20.40242111                                | 361.734521                                     | 0.068678555                                               | 6.58624612                                 |
| 25.63996848                                | 252.0205562                                    | 0.056416675                                               | 6.28139559                                 |
| 22.89332283                                | 671.5226381                                    | 0.065048379                                               | 6.684181529                                |
| 17.63103633                                | 179.1489002                                    | 0.06810276                                                | 6.167695409                                |
| 14.55344617                                | 289.539629                                     | 0.116836146                                               | 6.430471982                                |
| 42.82274174                                | 452.2059158                                    | 0.042836194                                               | 6.515727591                                |
| 39.24589556                                | 591.5280438                                    | 0.044679949                                               | 6.636575528                                |
| 32.18714848                                | 548.5978345                                    | 0.057883816                                               | 6.309205028                                |
| 23.9699968                                 | 289.3316953                                    | 0.069206575                                               | 6.406719803                                |
| 16.34401368                                | 662                                            | 0.076346274                                               | 6.150261025                                |
| 25.40543112                                | 478.3780085                                    | 0.057024904                                               | 6.451190629                                |
| 27.14142427                                | 684.664111                                     | 0.061535398                                               | 6.723618659                                |
| 13.8091038                                 | 487.9773463                                    | 0.0962359                                                 | 6.448387286                                |
| 13.88943952                                | 2358.562431                                    | 0.11547832                                                | 6.559997309                                |
| 19.91815498                                | 149.0599078                                    | 0.067255622                                               | 5.957860929                                |
| 29.00427024                                | 392.7990985                                    | 0.058082958                                               | 6.538417794                                |
| 33.98529336                                | 329.1446701                                    | 0.051882295                                               | 6.090101181                                |
| 24.83864692                                | 530.8423522                                    | 0.057885731                                               | 6.580436206                                |
| 24.92560176                                | 349.6524664                                    | 0.05728046                                                | 6.094648448                                |
| 30.27277522                                | 451.8796619                                    | 0.055535183                                               | 6.580637075                                |
| 22.37782624                                | 480.4082237                                    | 0.063728575                                               | 6.488593902                                |
| 21.13856215                                | 316.619132                                     | 0.061148982                                               | 6.41512169                                 |
| 17.39363201                                | 395.7894737                                    | 0.084699829                                               | 6.597433337                                |
| 14.64617832                                | 311.5412448                                    | 0.093864279                                               | 6.475859451                                |
| 21.21740569                                | 584.1214597                                    | 0.077888466                                               | 6.648499437                                |
| 39.68121234                                | 489.2275986                                    | 0.04539221                                                | 6.485925233                                |
| 23.93347381                                | 285.2318711                                    | 0.057705887                                               | 6.361246191                                |
| 26.89904864                                | 193.0131148                                    | 0.056404192                                               | 6.201347465                                |
| 24.70867463                                | 311.7460317                                    | 0.056690628                                               | 6.470245852                                |
| 26.26627946                                | 324.4898103                                    | 0.059606781                                               | 6.578893886                                |
| 37.88047603                                | 466.3869048                                    | 0.047264739                                               | 6.297292912                                |
| 51.11378811                                | 658.1610738                                    | 0.039400405                                               | 6.47913155                                 |
| 40.40122092                                | 2247.819126                                    | 0.052358714                                               | 6.650449651                                |
| 24.11681332                                | 287.2275862                                    | 0.076337693                                               | 5.545089567                                |
| 18.58583196                                | 261.9127101                                    | 0.069545115                                               | 6.429376296                                |
| 14.90009193                                | 665.364317                                     | 0.089827328                                               | 6.582388278                                |
| 23.58882938                                | 356.4871465                                    | 0.059367173                                               | 6.222528779                                |
| 29.84967144                                | 443.5998711                                    | 0.052719637                                               | 6.360140278                                |
| 18.04323808                                | 341.2568306                                    | 0.071217415                                               | 5.670605905                                |
| 38.25487528                                | 423.1619048                                    | 0.070839002                                               | 5.258113584                                |
| 24.91262428                                | 1285.457358                                    | 0.067339045                                               | 6.715946078                                |
| 45.09757722                                | 619.1954674                                    | 0.045871486                                               | 6.54468921                                 |
| 26.02557435                                | 439.8414873                                    | 0.068845478                                               | 6.66510649                                 |
| 20.78705986                                | 396.3506112                                    | 0.068167574                                               | 6.663681308                                |
| 17.33624795                                | 436.9862212                                    | 0.078439115                                               | 6.495647914                                |
| 63.09484604                                | 638.9051383                                    | 0.040291209                                               | 6.15208519                                 |
| 24.83958405                                | 590.3092105                                    | 0.064933291                                               | 6.46833578                                 |
| 29.78623835                                | 287.3495935                                    | 0.063784784                                               | 5.385286409                                |
| 17.75403958                                | 245.055409                                     | 0.072743854                                               | 5.977334888                                |
| 30.83467921                                | 361.3804213                                    | 0.065239256                                               | 6.617025276                                |

| log.sigma.1.5.mm.3D_gldm_DependenceNonUniformity | log.sigma.1.5.mm.3D_gldm_GrayLevelNonUniformity | log.sigma.1.5.mm.3D_gldm_SmallDependenceEmphasis |
|--------------------------------------------------|-------------------------------------------------|--------------------------------------------------|
| 172.6147309                                      | 36.59206799                                     | 0.450037584                                      |
| 281.4207992                                      | 183.2638421                                     | 0.27518316                                       |
| 108.4009217                                      | 25.34101382                                     | 0.448648578                                      |
| 694.1347249                                      | 122.0330171                                     | 0.456410008                                      |
| 80.97214485                                      | 25.27855153                                     | 0.372634732                                      |
| 137.5847589                                      | 40.88491446                                     | 0.372149303                                      |
| 68.88130564                                      | 31.55192878                                     | 0.355579358                                      |
| 263.8622754                                      | 49.11776447                                     | 0.438151346                                      |
| 495.5675806                                      | 110.029341                                      | 0.391592493                                      |
| 603.7023886                                      | 213.9025178                                     | 0.369149973                                      |
| 185.1233374                                      | 54.23579202                                     | 0.364562772                                      |
| 322.4952767                                      | 85.17139001                                     | 0.401908686                                      |
| 437.6692382                                      | 142.87946                                       | 0.357110248                                      |
| 222.4168157                                      | 76.94454383                                     | 0.34757154                                       |
| 229.3995609                                      | 55.97036224                                     | 0.423258287                                      |
| 646.8946308                                      | 1192.608176                                     | 0.202142316                                      |
| 154.6189112                                      | 42.48710602                                     | 0.357409813                                      |
| 429.8164666                                      | 162.2555746                                     | 0.295773178                                      |
| 142.4054983                                      | 33.43642612                                     | 0.405352422                                      |
| 355.931096                                       | 288.9585862                                     | 0.235425359                                      |
| 810.0700613                                      | 465.6278714                                     | 0.321134304                                      |
| 400.2593023                                      | 103.822093                                      | 0.384358291                                      |
| 464.9589894                                      | 221.032955                                      | 0.323298041                                      |
| 125.7941788                                      | 26.81288981                                     | 0.489842272                                      |
| 224.6312292                                      | 91.43521595                                     | 0.359574326                                      |
| 138.5360231                                      | 40.49855908                                     | 0.38030975                                       |
| 488.3150606                                      | 331.6843624                                     | 0.289131473                                      |
| 275.213538                                       | 103.5275645                                     | 0.388423853                                      |
| 454.8470255                                      | 88.64645892                                     | 0.430145127                                      |
| 337.2415421                                      | 244.6309992                                     | 0.286971118                                      |
| 587.6121422                                      | 251.5297263                                     | 0.359607268                                      |
| 933.6785835                                      | 555                                             | 0.265346544                                      |
| 468.3556321                                      | 102.6546975                                     | 0.404963065                                      |
| 30.76923077                                      | 7.711538462                                     | 0.492705662                                      |
| 96.45180723                                      | 15.78313253                                     | 0.506844043                                      |
| 442.2079208                                      | 126.8079208                                     | 0.343014176                                      |
| 568.9444444                                      | 182.6798611                                     | 0.378730557                                      |
| 696.4329159                                      | 209.6147883                                     | 0.382738534                                      |
| 181.754491                                       | 57.3497006                                      | 0.364112746                                      |
| 241.171592                                       | 56.83984747                                     | 0.403450256                                      |
| 261.394844                                       | 102.8398915                                     | 0.353209507                                      |
| 211.8037775                                      | 55.52465897                                     | 0.359051229                                      |
| 384.9208283                                      | 91.22411693                                     | 0.377927225                                      |
| 243.3629268                                      | 55.03902439                                     | 0.394010282                                      |
| 456.4206603                                      | 104.7209798                                     | 0.403926769                                      |
| 414.1238779                                      | 172.97307                                       | 0.34273464                                       |
| 1027.992968                                      | 218.193624                                      | 0.429017269                                      |
| 137.974271                                       | 32.9897084                                      | 0.433092394                                      |
| 33.28358209                                      | 12.74626866                                     | 0.424012167                                      |
| 126.3360161                                      | 29.69617706                                     | 0.393569421                                      |
| 658.4129673                                      | 235.1553738                                     | 0.348134055                                      |
| 205.0943168                                      | 46.65659008                                     | 0.400766297                                      |
| 742.9199163                                      | 248.5498561                                     | 0.35307477                                       |
| 131.9813875                                      | 40.24873096                                     | 0.380299091                                      |
| 869.6730032                                      | 762.122183                                      | 0.27031187                                       |
| 252.4175199                                      | 37.65301479                                     | 0.496202885                                      |
| 574.4062927                                      | 97.98312813                                     | 0.441197999                                      |
| 342.7648879                                      | 74.84377417                                     | 0.45399746                                       |
| 159.6879607                                      | 56.33415233                                     | 0.380257623                                      |
| 174.185017                                       | 67.26106697                                     | 0.34686332                                       |
| 485.7333648                                      | 120.8357716                                     | 0.385236043                                      |
| 1086.289157                                      | 337.0909091                                     | 0.364132503                                      |
| 479.8614887                                      | 297.368932                                      | 0.296098318                                      |
| 314.755401                                       | 315.3712926                                     | 0.227293169                                      |
| 52.25345622                                      | 14.59447005                                     | 0.430093087                                      |
| 342.689633                                       | 90.20283323                                     | 0.385614133                                      |
| 116.035533                                       | 20.44162437                                     | 0.501033559                                      |
| 690.1385674                                      | 185.0606819                                     | 0.364095545                                      |
| 113.2780269                                      | 25.5470852                                      | 0.438289736                                      |
| 466.2391845                                      | 111.6812531                                     | 0.414607295                                      |
| 634.0197368                                      | 193.7348684                                     | 0.379342067                                      |
| 244.2807795                                      | 69.03720106                                     | 0.359954354                                      |
| 787.1160991                                      | 437.7287152                                     | 0.29393106                                       |
| 1027.978856                                      | 630.3924955                                     | 0.282698363                                      |
| 1558.275817                                      | 715.016122                                      | 0.334513268                                      |
| 316.4892473                                      | 50.65770609                                     | 0.486226471                                      |
| 260.4270367                                      | 64.45747538                                     | 0.400540311                                      |
| 147.4131148                                      | 34.40655738                                     | 0.428060014                                      |
| 397.5260771                                      | 100.0022676                                     | 0.373820969                                      |
| 600.7470134                                      | 169.6408995                                     | 0.376001044                                      |
| 141.6111111                                      | 23.82142857                                     | 0.465269218                                      |
| 435.5428784                                      | 52.83594333                                     | 0.536497639                                      |
| 700.6618911                                      | 146.1855301                                     | 0.441278468                                      |
| 34.33793103                                      | 11.06896552                                     | 0.429708812                                      |
| 688.7133589                                      | 235.8274845                                     | 0.346350648                                      |
| 812.9897736                                      | 491.8944485                                     | 0.28165536                                       |
| 189.8560411                                      | 46.18766067                                     | 0.395244597                                      |
| 406.2654639                                      | 81.82087629                                     | 0.414513358                                      |
| 43.78688525                                      | 13.03278689                                     | 0.406597842                                      |
| 33.55238095                                      | 7.438095238                                     | 0.564137566                                      |
| 732.7162264                                      | 267.6727044                                     | 0.345090582                                      |
| 183.407932                                       | 32.38526912                                     | 0.454999313                                      |
| 190.1722114                                      | 70.36007828                                     | 0.399308637                                      |
| 746.7833741                                      | 278.805379                                      | 0.338072583                                      |
| 1003.849811                                      | 455.4174991                                     | 0.313699469                                      |
| 80.2173913                                       | 10.19367589                                     | 0.545916776                                      |
| 252.6726974                                      | 78.95888158                                     | 0.36602571                                       |
| 38.44715447                                      | 7.845528455                                     | 0.548992773                                      |
| 81.22163588                                      | 27.56992084                                     | 0.335687093                                      |
| 146.2565056                                      | 52.64807931                                     | 0.366349952                                      |

| log.sigma.1.5.mm.3D_gldm_DependenceNonUniformityNormalized | log.sigma.1.5.mm.3D_gldm_DependenceVariance | log.sigma.1.5.mm.3D_gldm_LargeDependenceEmphasis |
|------------------------------------------------------------|---------------------------------------------|--------------------------------------------------|
| 0.244496786                                                | 2.790199745                                 | 8.739376771                                      |
| 0.135493885                                                | 9.981686764                                 | 26.51372171                                      |
| 0.249771709                                                | 2.41799571                                  | 8.138248848                                      |
| 0.263428738                                                | 2.562842771                                 | 7.9943074                                        |
| 0.22554915                                                 | 1.963501214                                 | 8.459610028                                      |
| 0.213973187                                                | 2.331015434                                 | 9.279937792                                      |
| 0.204395566                                                | 2.48087066                                  | 10.0148368                                       |
| 0.263335604                                                | 1.553515723                                 | 6.622754491                                      |
| 0.238368245                                                | 2.051766665                                 | 8.142857143                                      |
| 0.194868428                                                | 3.878834759                                 | 12.19883796                                      |
| 0.223849259                                                | 1.797154383                                 | 8.325272068                                      |
| 0.217608149                                                | 2.973319055                                 | 9.955465587                                      |
| 0.211026634                                                | 2.26951121                                  | 9.425265188                                      |
| 0.198941696                                                | 3.070100262                                 | 11.11985689                                      |
| 0.251810715                                                | 1.662100369                                 | 7.072447859                                      |
| 0.093118559                                                | 13.17617535                                 | 41.8426659                                       |
| 0.221517065                                                | 1.889417985                                 | 8.598853868                                      |
| 0.184312378                                                | 3.241550183                                 | 12.65265866                                      |
| 0.244682987                                                | 2.146302004                                 | 8.082474227                                      |
| 0.127072865                                                | 9.137884274                                 | 27.10567654                                      |
| 0.15506701                                                 | 7.890468277                                 | 20.9161562                                       |
| 0.232708897                                                | 1.91384397                                  | 8.111627907                                      |
| 0.170252285                                                | 4.349009119                                 | 14.55108019                                      |
| 0.261526359                                                | 2.084888983                                 | 7.324324324                                      |
| 0.186570788                                                | 4.847377512                                 | 14.07807309                                      |
| 0.19961963                                                 | 3.940519396                                 | 12.129683                                        |
| 0.140887207                                                | 9.289409045                                 | 24.70398153                                      |
| 0.192054109                                                | 3.952513016                                 | 12.45708304                                      |
| 0.257703697                                                | 1.658938279                                 | 6.932011331                                      |
| 0.132667798                                                | 10.20280592                                 | 27.14791503                                      |
| 0.184841819                                                | 3.663972074                                 | 12.44636678                                      |
| 0.157450014                                                | 5.376410113                                 | 17.76728499                                      |
| 0.230376602                                                | 2.766118997                                 | 9.200688637                                      |
| 0.295857988                                                | 1.152366864                                 | 5.307692308                                      |
| 0.290517492                                                | 1.420598055                                 | 5.765060241                                      |
| 0.218914812                                                | 2.040519557                                 | 9.06039604                                       |
| 0.197550154                                                | 5.596201775                                 | 14.70486111                                      |
| 0.207642491                                                | 3.959136716                                 | 11.78711986                                      |
| 0.217670049                                                | 2.226239736                                 | 9.136526946                                      |
| 0.229906189                                                | 2.37346749                                  | 8.731172545                                      |
| 0.177337072                                                | 6.866242367                                 | 17.62143826                                      |
| 0.222249504                                                | 2.073954343                                 | 8.840503673                                      |
| 0.234421942                                                | 1.684016254                                 | 7.791717418                                      |
| 0.237427246                                                | 1.653063653                                 | 7.530731707                                      |
| 0.243035495                                                | 1.828976513                                 | 7.616613419                                      |
| 0.185872477                                                | 3.572883394                                 | 12.41202873                                      |
| 0.240973504                                                | 2.842522863                                 | 8.977027661                                      |
| 0.236662557                                                | 2.138339281                                 | 8.02915952                                       |
| 0.248384941                                                | 1.628425039                                 | 7.119402985                                      |
| 0.254197215                                                | 1.617981531                                 | 7.245472837                                      |
| 0.192293507                                                | 4.809251559                                 | 13.9182243                                       |
| 0.247997965                                                | 1.808588318                                 | 7.546553809                                      |
| 0.194430755                                                | 5.628591591                                 | 15.03506935                                      |
| 0.223318761                                                | 1.970642549                                 | 8.438240271                                      |
| 0.133324085                                                | 7.458531398                                 | 23.05273647                                      |
| 0.287164414                                                | 1.528839396                                 | 5.992036405                                      |
| 0.261927174                                                | 1.657631368                                 | 6.779297766                                      |
| 0.265092721                                                | 1.463659697                                 | 6.35962877                                       |
| 0.196176856                                                | 4.780306552                                 | 13.42997543                                      |
| 0.197712846                                                | 2.600272366                                 | 10.4415437                                       |
| 0.229227638                                                | 1.860168934                                 | 8.08541765                                       |
| 0.198300321                                                | 4.668618515                                 | 13.37531946                                      |
| 0.15529498                                                 | 6.05613159                                  | 18.40776699                                      |
| 0.115252802                                                | 13.1357742                                  | 35.52727938                                      |
| 0.240799337                                                | 2.103676018                                 | 7.912442396                                      |
| 0.220662996                                                | 2.406184735                                 | 9.130070831                                      |
| 0.294506429                                                | 1.346543328                                 | 5.593908629                                      |
| 0.215870681                                                | 2.683853695                                 | 9.844541758                                      |
| 0.253986607                                                | 1.556958716                                 | 6.766816143                                      |
| 0.231844448                                                | 2.370286151                                 | 8.584286425                                      |
| 0.208559124                                                | 2.477991257                                 | 9.601973684                                      |
| 0.216369158                                                | 2.02811929                                  | 8.897254207                                      |
| 0.152305747                                                | 6.731207137                                 | 19.6873065                                       |
| 0.153064154                                                | 5.832366397                                 | 18.47528291                                      |
| 0.169746821                                                | 4.988564465                                 | 15.4204793                                       |
| 0.283592516                                                | 1.314300947                                 | 5.725806452                                      |
| 0.233148645                                                | 1.895305641                                 | 7.925693823                                      |
| 0.241660844                                                | 1.91841978                                  | 7.6                                              |
| 0.225354919                                                | 2.379763319                                 | 9.068027211                                      |
| 0.211084685                                                | 3.806609022                                 | 11.42234715                                      |
| 0.280974427                                                | 1.456207483                                 | 6.099206349                                      |
| 0.324789619                                                | 0.943021697                                 | 4.539149888                                      |
| 0.250953399                                                | 2.22593975                                  | 7.817335244                                      |
| 0.236813317                                                | 1.816123662                                 | 7.675862069                                      |
| 0.203100371                                                | 2.859481892                                 | 10.6437629                                       |
| 0.148464166                                                | 6.776554416                                 | 20.23886048                                      |
| 0.244030901                                                | 1.709062192                                 | 7.498714653                                      |
| 0.261768984                                                | 1.462706916                                 | 6.682989691                                      |
| 0.239272597                                                | 1.928394398                                 | 7.841530055                                      |
| 0.319546485                                                | 1.495147392                                 | 5.533333333                                      |
| 0.184331126                                                | 5.614426391                                 | 15.46691824                                      |
| 0.259784606                                                | 1.85052444                                  | 7.050991501                                      |
| 0.186078485                                                | 8.272731799                                 | 19.30136986                                      |
| 0.182587622                                                | 4.958609525                                 | 14.64303178                                      |
| 0.172898693                                                | 4.447614563                                 | 14.65105064                                      |
| 0.317064788                                                | 1.194988205                                 | 4.992094862                                      |
| 0.207790047                                                | 2.990951242                                 | 10.54440789                                      |
| 0.312578492                                                | 1.292616829                                 | 5.260162602                                      |
| 0.214305108                                                | 1.898232399                                 | 9.042216359                                      |
| 0.181234827                                                | 4.896228631                                 | 14.53159851                                      |

| log.sigma.1.5.mm.3D_gldm_LargeDependenceLowGrayLevelEmphasis | log.sigma.1.5.mm.3D_gldm_SmallDependenceHighGrayLevelEmphasis | log.sigma.1.5.mm.3D_gldm_LargeDependenceHighGrayLevelEmphasis |
|--------------------------------------------------------------|---------------------------------------------------------------|---------------------------------------------------------------|
| 0.048491365                                                  | 157.5417747                                                   | 2205.607649                                                   |
| 0.075147978                                                  | 120.5043337                                                   | 9833.492056                                                   |
| 0.074377875                                                  | 119.4533747                                                   | 1293.152074                                                   |
| 0.017107499                                                  | 294.3065784                                                   | 4488.473245                                                   |
| 0.052967384                                                  | 94.21366866                                                   | 1983.86351                                                    |
| 0.046719666                                                  | 110.180476                                                    | 2362.609642                                                   |
| 0.030640182                                                  | 135.0477907                                                   | 4044.219585                                                   |
| 0.028853195                                                  | 175.7013901                                                   | 2237.284431                                                   |
| 0.027282709                                                  | 162.9268803                                                   | 3061.328523                                                   |
| 0.033866614                                                  | 175.4790872                                                   | 4818.124274                                                   |
| 0.05898663                                                   | 88.16369163                                                   | 1672.453446                                                   |
| 0.015110971                                                  | 332.3005687                                                   | 7328.152497                                                   |
| 0.066228157                                                  | 80.31879824                                                   | 1752.635969                                                   |
| 0.103376444                                                  | 68.14937923                                                   | 1694.270125                                                   |
| 0.026370975                                                  | 165.8946633                                                   | 2573.384193                                                   |
| 0.161903738                                                  | 68.20146758                                                   | 11085.2165                                                    |
| 0.093607018                                                  | 67.61891696                                                   | 1390.04298                                                    |
| 0.064323028                                                  | 85.79109121                                                   | 2953.601201                                                   |
| 0.041074467                                                  | 123.9299304                                                   | 2293.085911                                                   |
| 0.142035116                                                  | 58.40012606                                                   | 5554.313816                                                   |
| 0.061166727                                                  | 141.5650201                                                   | 7472.988132                                                   |
| 0.025211541                                                  | 175.6359368                                                   | 3080.45814                                                    |
| 0.073060304                                                  | 92.88903661                                                   | 3260.198828                                                   |
| 0.028696578                                                  | 191.4985494                                                   | 2805.656965                                                   |
| 0.108270227                                                  | 79.59243942                                                   | 2207.127076                                                   |
| 0.040151379                                                  | 163.4655461                                                   | 4341.170029                                                   |
| 0.051579287                                                  | 162.8944641                                                   | 12205.75476                                                   |
| 0.045152346                                                  | 170.6698572                                                   | 4263.337055                                                   |
| 0.031169065                                                  | 158.3085063                                                   | 2310.377904                                                   |
| 0.110711285                                                  | 88.74986708                                                   | 7074.156963                                                   |
| 0.066988434                                                  | 106.0636075                                                   | 2643.659012                                                   |
| 0.131241718                                                  | 51.9789284                                                    | 2710.273356                                                   |
| 0.029930339                                                  | 184.4125374                                                   | 3548.780128                                                   |
| 0.040123131                                                  | 151.1481704                                                   | 1871.913462                                                   |
| 0.032971935                                                  | 192.0485576                                                   | 1863.084337                                                   |
| 0.040922068                                                  | 101.5468425                                                   | 2519.372772                                                   |
| 0.059509747                                                  | 144.5331476                                                   | 4339.224653                                                   |
| 0.018568576                                                  | 296.1373349                                                   | 8005.55486                                                    |
| 0.066491276                                                  | 74.65142587                                                   | 1891.372455                                                   |
| 0.025467608                                                  | 187.7225983                                                   | 3628.530982                                                   |
| 0.056763438                                                  | 137.7158784                                                   | 5970.459294                                                   |
| 0.045688294                                                  | 113.1475254                                                   | 2270.739769                                                   |
| 0.028732584                                                  | 135.3672819                                                   | 2808.689403                                                   |
| 0.041049518                                                  | 125.091311                                                    | 2175.960976                                                   |
| 0.01937065                                                   | 197.5535477                                                   | 3643.386049                                                   |
| 0.08531778                                                   | 78.26417838                                                   | 2125.742819                                                   |
| 0.011255462                                                  | 408.1878812                                                   | 7857.93624                                                    |
| 0.036545507                                                  | 152.0173576                                                   | 2376.744425                                                   |
| 0.183369421                                                  | 108.8762576                                                   | 1639.30597                                                    |
| 0.019616801                                                  | 197.7433949                                                   | 3592.641851                                                   |
| 0.046250885                                                  | 137.6707169                                                   | 4620.007886                                                   |
| 0.049757941                                                  | 107.3683429                                                   | 1814.110036                                                   |
| 0.024759162                                                  | 248.4018383                                                   | 9680.780424                                                   |
| 0.081352874                                                  | 75.69190458                                                   | 1303.094755                                                   |
| 0.091234812                                                  | 87.80918485                                                   | 6163.586233                                                   |
| 0.021188593                                                  | 234.8398338                                                   | 2526.194539                                                   |
| 0.016443378                                                  | 280.2027502                                                   | 3600.94984                                                    |
| 0.015390405                                                  | 247.5348672                                                   | 3537.524362                                                   |
| 0.062020641                                                  | 119.6392269                                                   | 3576.002457                                                   |
| 0.019389239                                                  | 243.6994152                                                   | 6366.215664                                                   |
| 0.021500678                                                  | 198.0733224                                                   | 3572.553563                                                   |
| 0.022046788                                                  | 261.6812173                                                   | 8661.741877                                                   |
| 0.04232165                                                   | 156.3014693                                                   | 8365.280906                                                   |
| 0.015636535                                                  | 539.504814                                                    | 82996.64152                                                   |
| 0.114941799                                                  | 70.53109037                                                   | 1052.175115                                                   |
| 0.030654794                                                  | 162.1851366                                                   | 3314.09208                                                    |
| 0.03203142                                                   | 162.276795                                                    | 1748.200508                                                   |
| 0.022021369                                                  | 204.0970976                                                   | 4986.473256                                                   |
| 0.027273402                                                  | 160.4354628                                                   | 2261.307175                                                   |
| 0.025358508                                                  | 204.9927023                                                   | 3562.024863                                                   |
| 0.024289575                                                  | 195.7700184                                                   | 4257.094408                                                   |
| 0.038565829                                                  | 120.7523056                                                   | 2639.747564                                                   |
| 0.056548677                                                  | 131.4833991                                                   | 7246.309598                                                   |
| 0.067431266                                                  | 98.36293225                                                   | 5406.183889                                                   |
| 0.028942609                                                  | 206.2171639                                                   | 8629.667429                                                   |
| 0.017669211                                                  | 240.4016483                                                   | 2799.976703                                                   |
| 0.040953905                                                  | 123.0026566                                                   | 2078.63205                                                    |
| 0.077594596                                                  | 92.06802004                                                   | 1227.072131                                                   |
| 0.043322361                                                  | 126.1679881                                                   | 2506.914966                                                   |
| 0.046095775                                                  | 136.444206                                                    | 3339.354884                                                   |
| 0.020255561                                                  | 232.502744                                                    | 2616.763889                                                   |
| 0.010281457                                                  | 348.6247162                                                   | 3030.614467                                                   |
| 0.004037105                                                  | 1018.388207                                                   | 17147.16655                                                   |
| 0.051239278                                                  | 135.4357989                                                   | 1981.37931                                                    |
| 0.054139102                                                  | 100.1296225                                                   | 2505.07166                                                    |
| 0.032690908                                                  | 199.940558                                                    | 12914.50968                                                   |
| 0.02958972                                                   | 152.5907129                                                   | 2411.520566                                                   |
| 0.020773175                                                  | 184.6598364                                                   | 2871.210696                                                   |
| 0.035012592                                                  | 145.3812614                                                   | 2506.721311                                                   |
| 0.03605314                                                   | 223.7435873                                                   | 2590.133333                                                   |
| 0.01289051                                                   | 447.7422756                                                   | 19449.72855                                                   |
| 0.016189165                                                  | 308.5413823                                                   | 3951.994334                                                   |
| 0.051824597                                                  | 191.1993304                                                   | 7823.90998                                                    |
| 0.043777695                                                  | 145.0871428                                                   | 5443.022494                                                   |
| 0.039167522                                                  | 151.9615616                                                   | 5850.377885                                                   |
| 0.016053888                                                  | 367.9284102                                                   | 2864.083004                                                   |
| 0.021874325                                                  | 210.4948156                                                   | 6218.794408                                                   |
| 0.052413036                                                  | 164.4726874                                                   | 1367.772358                                                   |
| 0.04891216                                                   | 81.40007168                                                   | 2187.335092                                                   |
| 0.051714818                                                  | 156.8742125                                                   | 4662.609665                                                   |

| log.sigma.1.5.mm.3D_gldm_SmallDependenceLowGrayLevelEmphasis | log.sigma.1.5.mm.3D_gldm_LowGrayLevelEmphasis | log.sigma.1.5.mm.3D_gldm_DistanceZoneVariabilityNormalized |
|--------------------------------------------------------------|-----------------------------------------------|------------------------------------------------------------|
| 0.005971619                                                  | 0.009031453                                   | 0.889563372                                                |
| 0.001445655                                                  | 0.003640078                                   | 0.90685045                                                 |
| 0.008249104                                                  | 0.013564891                                   | 0.955969483                                                |
| 0.00164799                                                   | 0.002816325                                   | 0.870429988                                                |
| 0.007360592                                                  | 0.011245502                                   | 0.836620644                                                |
| 0.003703417                                                  | 0.00668693                                    | 0.884789323                                                |
| 0.004415935                                                  | 0.006278599                                   | 0.678277522                                                |
| 0.003482389                                                  | 0.005804537                                   | 0.85107563                                                 |
| 0.00235489                                                   | 0.004430351                                   | 0.919577983                                                |
| 0.001746447                                                  | 0.003512089                                   | 0.935850498                                                |
| 0.004554761                                                  | 0.009009445                                   | 0.893389511                                                |
| 0.001387354                                                  | 0.002259807                                   | 0.8972994                                                  |
| 0.004705071                                                  | 0.009141233                                   | 0.907977149                                                |
| 0.004810967                                                  | 0.011744412                                   | 0.898168071                                                |
| 0.005266695                                                  | 0.00716673                                    | 0.85654321                                                 |
| 0.001123557                                                  | 0.004357555                                   | 0.892006197                                                |
| 0.0073517                                                    | 0.0146936                                     | 0.779333481                                                |
| 0.00223197                                                   | 0.005834042                                   | 0.957253124                                                |
| 0.004385672                                                  | 0.007253746                                   | 0.803086735                                                |
| 0.002400591                                                  | 0.006626354                                   | 0.926835945                                                |
| 0.001300214                                                  | 0.003395458                                   | 0.890793129                                                |
| 0.001795329                                                  | 0.003667776                                   | 0.86827752                                                 |
| 0.002221026                                                  | 0.005729075                                   | 0.943791061                                                |
| 0.007148754                                                  | 0.008837707                                   | 0.714625446                                                |
| 0.004927315                                                  | 0.010392116                                   | 0.911658726                                                |
| 0.003597885                                                  | 0.005683275                                   | 0.916824197                                                |
| 0.001036914                                                  | 0.002556606                                   | 0.880115415                                                |
| 0.001739747                                                  | 0.004790051                                   | 0.937074493                                                |
| 0.003955709                                                  | 0.006601948                                   | 0.933697077                                                |
| 0.002164562                                                  | 0.005413988                                   | 0.925413651                                                |
| 0.002598695                                                  | 0.006227402                                   | 0.945610258                                                |
| 0.003073377                                                  | 0.008652386                                   | 0.931272522                                                |
| 0.002597603                                                  | 0.0045722                                     | 0.917904536                                                |
| 0.01583379                                                   | 0.019234381                                   | 0.748454716                                                |
| 0.006744487                                                  | 0.009740617                                   | 0.846495436                                                |
| 0.002566766                                                  | 0.005566771                                   | 0.887500913                                                |
| 0.002394435                                                  | 0.005585063                                   | 0.96061481                                                 |
| 0.000929911                                                  | 0.001888535                                   | 0.914024793                                                |
| 0.006732157                                                  | 0.011207869                                   | 0.810243126                                                |
| 0.002411561                                                  | 0.004106143                                   | 0.940295738                                                |
| 0.00257922                                                   | 0.004786512                                   | 0.83316563                                                 |
| 0.00338404                                                   | 0.006609155                                   | 0.879012896                                                |
| 0.002503667                                                  | 0.004802342                                   | 0.897605109                                                |
| 0.005157243                                                  | 0.008353796                                   | 0.869176809                                                |
| 0.001795996                                                  | 0.003338408                                   | 0.880613486                                                |
| 0.003589251                                                  | 0.008356685                                   | 0.956293426                                                |
| 0.000887961                                                  | 0.001592616                                   | 0.836052268                                                |
| 0.003956633                                                  | 0.006467115                                   | 0.966896802                                                |
| 0.009642271                                                  | 0.031771926                                   | 0.74604589                                                 |
| 0.003149269                                                  | 0.004662579                                   | 0.826053465                                                |
| 0.001709924                                                  | 0.003964868                                   | 0.947630017                                                |
| 0.005008885                                                  | 0.009221035                                   | 0.934911004                                                |
| 0.000915166                                                  | 0.002007028                                   | 0.917791749                                                |
| 0.00957733                                                   | 0.015194996                                   | 0.89956382                                                 |
| 0.001554078                                                  | 0.004624229                                   | 0.958075512                                                |
| 0.003396927                                                  | 0.005080513                                   | 0.809801455                                                |
| 0.001600627                                                  | 0.002875988                                   | 0.7547416                                                  |
| 0.002268031                                                  | 0.003582241                                   | 0.688988628                                                |
| 0.007205238                                                  | 0.010161844                                   | 0.863184401                                                |
| 0.001996715                                                  | 0.003082059                                   | 0.988372491                                                |
| 0.001588206                                                  | 0.003178988                                   | 0.917243052                                                |
| 0.000867381                                                  | 0.001936149                                   | 0.920876946                                                |
| 0.001083896                                                  | 0.002703433                                   | 0.950176401                                                |
| 0.000470887                                                  | 0.00080392                                    | 0.963133583                                                |
| 0.016059846                                                  | 0.024728881                                   | 0.91011036                                                 |
| 0.002384751                                                  | 0.004538232                                   | 0.881872891                                                |
| 0.007657407                                                  | 0.009889714                                   | 0.755102041                                                |
| 0.001265829                                                  | 0.002705222                                   | 0.957745659                                                |
| 0.004475497                                                  | 0.006563947                                   | 0.868431357                                                |
| 0.001935209                                                  | 0.003734566                                   | 0.897786645                                                |
| 0.001337483                                                  | 0.002886578                                   | 0.886464176                                                |
| 0.002690507                                                  | 0.005426602                                   | 0.925269045                                                |
| 0.001178974                                                  | 0.003301422                                   | 0.934294205                                                |
| 0.001485194                                                  | 0.004249064                                   | 0.952924247                                                |
| 0.000922262                                                  | 0.00220014                                    | 0.929539579                                                |
| 0.003019766                                                  | 0.004594277                                   | 0.823045185                                                |
| 0.003533225                                                  | 0.00654284                                    | 0.846952587                                                |
| 0.009641129                                                  | 0.015021608                                   | 0.897735573                                                |
| 0.003265681                                                  | 0.006173613                                   | 0.845055474                                                |
| 0.002548534                                                  | 0.005193169                                   | 0.867346399                                                |
| 0.003847071                                                  | 0.005433805                                   | 0.858935537                                                |
| 0.002527626                                                  | 0.003448829                                   | 0.808538249                                                |
| 0.00057314                                                   | 0.000839001                                   | 0.880592969                                                |
| 0.010165854                                                  | 0.01311811                                    | 0.760802469                                                |
| 0.002751802                                                  | 0.006127687                                   | 0.960513477                                                |
| 0.000666237                                                  | 0.001834035                                   | 0.764225322                                                |
| 0.002944932                                                  | 0.005189713                                   | 0.930011548                                                |
| 0.002335396                                                  | 0.004083246                                   | 0.816280303                                                |
| 0.006897472                                                  | 0.009142352                                   | 0.936909263                                                |
| 0.024073777                                                  | 0.025271545                                   | 0.836934729                                                |
| 0.000611764                                                  | 0.001148444                                   | 0.901843236                                                |
| 0.002547058                                                  | 0.003711854                                   | 0.962878013                                                |
| 0.002659961                                                  | 0.004361896                                   | 0.855727788                                                |
| 0.001791633                                                  | 0.003918179                                   | 0.913328831                                                |
| 0.001181414                                                  | 0.003022366                                   | 0.943208558                                                |
| 0.00578787                                                   | 0.006853499                                   | 0.733616408                                                |
| 0.003129352                                                  | 0.004373256                                   | 0.953424582                                                |
| 0.012151452                                                  | 0.015525865                                   | 0.854570637                                                |
| 0.006257562                                                  | 0.009571572                                   | 0.785089546                                                |
| 0.002769578                                                  | 0.005268024                                   | 0.912209718                                                |

| log.sigma.1.5.mm.3D_gldzm_LowIntensityEmphasis | log.sigma.1.5.mm.3D_gldzm_LargeDistanceEmphasis | log.sigma.1.5.mm.3D_gldzm_HighIntensitySmallDistanceEmphasis |
|------------------------------------------------|-------------------------------------------------|--------------------------------------------------------------|
| 0.012414711                                    | 1.175977654                                     | 339.7115922                                                  |
| 0.005093741                                    | 1.146919431                                     | 430.2322275                                                  |
| 0.017297958                                    | 1.067567568                                     | 263.1362613                                                  |
| 0.00342816                                     | 1.208901651                                     | 611.5355348                                                  |
| 0.018156022                                    | 1.269230769                                     | 240.1185897                                                  |
| 0.009227792                                    | 1.184115523                                     | 290.2355596                                                  |
| 0.011177803                                    | 1.604316547                                     | 342.4856115                                                  |
| 0.00743411                                     | 1.243083004                                     | 391.4629447                                                  |
| 0.005704851                                    | 1.125918153                                     | 401.5603358                                                  |
| 0.004553527                                    | 1.099526066                                     | 469.5831359                                                  |
| 0.011853439                                    | 1.169491525                                     | 232.8036723                                                  |
| 0.003249222                                    | 1.162895928                                     | 803.9487179                                                  |
| 0.012484807                                    | 1.14504717                                      | 219.3469929                                                  |
| 0.01420133                                     | 1.161434978                                     | 195.9742152                                                  |
| 0.011169061                                    | 1.233333333                                     | 368.7338889                                                  |
| 0.005589668                                    | 1.171832884                                     | 326.0815364                                                  |
| 0.019832972                                    | 1.37883959                                      | 178.309727                                                   |
| 0.007310066                                    | 1.065552699                                     | 292.5838689                                                  |
| 0.01004404                                     | 1.332142857                                     | 296.5098214                                                  |
| 0.009951589                                    | 1.114084507                                     | 248.6514085                                                  |
| 0.003981307                                    | 1.173889491                                     | 424.9849675                                                  |
| 0.004401472                                    | 1.212658228                                     | 436.8360759                                                  |
| 0.006698896                                    | 1.086826347                                     | 285.2664671                                                  |
| 0.013541651                                    | 1.517241379                                     | 349.4750958                                                  |
| 0.013497905                                    | 1.138947368                                     | 215.0857895                                                  |
| 0.008771645                                    | 1.130434783                                     | 431.8971572                                                  |
| 0.003474878                                    | 1.192131747                                     | 537.0240165                                                  |
| 0.005187719                                    | 1.097560976                                     | 428.4186992                                                  |
| 0.00862266                                     | 1.102990033                                     | 357.790144                                                   |
| 0.007405759                                    | 1.116395494                                     | 305.8651439                                                  |
| 0.007206859                                    | 1.083932854                                     | 288.97502                                                    |
| 0.011225192                                    | 1.106900452                                     | 194.6814197                                                  |
| 0.006042541                                    | 1.128661088                                     | 439.7241109                                                  |
| 0.028269092                                    | 1.442622951                                     | 298.6516393                                                  |
| 0.012733669                                    | 1.251308901                                     | 361.2945026                                                  |
| 0.007091584                                    | 1.179487179                                     | 287.6959707                                                  |
| 0.006541555                                    | 1.060289389                                     | 373.4085611                                                  |
| 0.002324457                                    | 1.135041551                                     | 752.6757271                                                  |
| 0.016818828                                    | 1.318435754                                     | 197.9706704                                                  |
| 0.005568604                                    | 1.092402464                                     | 460.7931211                                                  |
| 0.006998955                                    | 1.275563258                                     | 366.5381282                                                  |
| 0.008820014                                    | 1.194029851                                     | 306.5211443                                                  |
| 0.006209431                                    | 1.162381597                                     | 353.3660352                                                  |
| 0.012123072                                    | 1.21108742                                      | 314.1561834                                                  |
| 0.004206839                                    | 1.191275168                                     | 461.7290268                                                  |
| 0.010268982                                    | 1.067058824                                     | 227.7597059                                                  |
| 0.00196337                                     | 1.27027027                                      | 892.6543385                                                  |
| 0.008373405                                    | 1.050505051                                     | 349.5496633                                                  |
| 0.026437078                                    | 1.447761194                                     | 245.4067164                                                  |
| 0.007049159                                    | 1.288702929                                     | 478.5868201                                                  |
| 0.004751629                                    | 1.080727273                                     | 388.8196364                                                  |
| 0.011950359                                    | 1.101036269                                     | 264.2927461                                                  |
| 0.002473777                                    | 1.128846154                                     | 687.2285256                                                  |
| 0.022963214                                    | 1.159090909                                     | 195.5681818                                                  |
| 0.005748935                                    | 1.064263323                                     | 323.1968391                                                  |
| 0.006415913                                    | 1.319277108                                     | 445.8669679                                                  |
| 0.003423664                                    | 1.429328622                                     | 581.2791519                                                  |
| 0.004712524                                    | 1.577777778                                     | 485.8325926                                                  |
| 0.017419213                                    | 1.221590909                                     | 308.3167614                                                  |
| 0.005296783                                    | 1.01754386                                      | 708.3304094                                                  |
| 0.003903686                                    | 1.129746835                                     | 505.3662975                                                  |
| 0.00230474                                     | 1.123792801                                     | 696.1479368                                                  |
| 0.003527283                                    | 1.076696165                                     | 523.0243363                                                  |
| 0.001904077                                    | 1.056358382                                     | 2350.515896                                                  |
| 0.03512417                                     | 1.141509434                                     | 164.2853774                                                  |
| 0.005876119                                    | 1.189111748                                     | 403.967765                                                   |
| 0.013743564                                    | 1.428571429                                     | 306.9837662                                                  |
| 0.00332864                                     | 1.064780343                                     | 555.6332837                                                  |
| 0.009367818                                    | 1.212389381                                     | 356.2245575                                                  |
| 0.004522824                                    | 1.162076271                                     | 474.9237288                                                  |
| 0.003412141                                    | 1.181254841                                     | 501.9455848                                                  |
| 0.007125939                                    | 1.11663067                                      | 331.8790497                                                  |
| 0.00393355                                     | 1.10202864                                      | 441.2775955                                                  |
| 0.005189844                                    | 1.0723589                                       | 346.095152                                                   |
| 0.002701041                                    | 1.109702153                                     | 598.3714981                                                  |
| 0.005843482                                    | 1.294303797                                     | 467.4707278                                                  |
| 0.008346116                                    | 1.250485437                                     | 291.9616505                                                  |
| 0.020771552                                    | 1.162162162                                     | 216.4146959                                                  |
| 0.008229018                                    | 1.25390625                                      | 325.3037109                                                  |
| 0.006494755                                    | 1.214285714                                     | 343.0635146                                                  |
| 0.007473118                                    | 1.229090909                                     | 486.6572727                                                  |
| 0.004348954                                    | 1.321686747                                     | 609.9129518                                                  |
| 0.001188037                                    | 1.191310441                                     | 2184.179047                                                  |
| 0.021375889                                    | 1.416666667                                     | 294.7604167                                                  |
| 0.007664663                                    | 1.060447761                                     | 285.1078358                                                  |
| 0.002315286                                    | 1.409580838                                     | 626.7327844                                                  |
| 0.00689695                                     | 1.108938547                                     | 380.8310056                                                  |
| 0.00520868                                     | 1.306994819                                     | 431.4501295                                                  |
| 0.014399441                                    | 1.097826087                                     | 353.3451087                                                  |
| 0.038079384                                    | 1.268656716                                     | 389.7164179                                                  |
| 0.001657345                                    | 1.155271565                                     | 1259.279233                                                  |
| 0.005156904                                    | 1.056756757                                     | 664.5358108                                                  |
| 0.006295758                                    | 1.234782609                                     | 443.586413                                                   |
| 0.005152865                                    | 1.136189258                                     | 417.1015026                                                  |
| 0.003646217                                    | 1.08775409                                      | 482.2029003                                                  |
| 0.009578992                                    | 1.474683544                                     | 623.8560127                                                  |
| 0.007854032                                    | 1.071570577                                     | 567.2415507                                                  |
| 0.0203341                                      | 1.236842105                                     | 299.1052632                                                  |
| 0.016869663                                    | 1.367346939                                     | 234.4353741                                                  |
| 0.007407057                                    | 1.13803681                                      | 415.2384969                                                  |

| log.sigma.1.5.mm.3D_gldzm_LowIntensityLargeDistanceEmphasis | log.sigma.1.5.mm.3D_gldzm_HighIntensityEmphasis | log.sigma.1.5.mm.3D_gldzm_DistanceZoneVariability | log.sigma.1.5.mm.3D_gldzm_ZonePercentage |
|-------------------------------------------------------------|-------------------------------------------------|---------------------------------------------------|------------------------------------------|
| 0.01471787                                                  | 341.3687151                                     | 318.4636872                                       | 0.507082153                              |
| 0.006349195                                                 | 440.1990521                                     | 574.0363349                                       | 0.30476649                               |
| 0.035785195                                                 | 263.4504505                                     | 212.2252252                                       | 0.511520737                              |
| 0.004301181                                                 | 644.22972                                       | 1212.508973                                       | 0.528652751                              |
| 0.045201564                                                 | 245.6474359                                     | 130.5128205                                       | 0.43454039                               |
| 0.011728599                                                 | 297.0938628                                     | 245.0866426                                       | 0.430793157                              |
| 0.037847971                                                 | 380.3309353                                     | 94.28057554                                       | 0.412462908                              |
| 0.011823281                                                 | 404.4841897                                     | 430.6442688                                       | 0.50499002                               |
| 0.006347783                                                 | 413.4847849                                     | 876.3578174                                       | 0.458393458                              |
| 0.004987576                                                 | 478.0221169                                     | 1184.78673                                        | 0.408650742                              |
| 0.01426858                                                  | 239.3333333                                     | 316.259887                                        | 0.428053204                              |
| 0.003584699                                                 | 828.8989442                                     | 594.9095023                                       | 0.447368421                              |
| 0.021650932                                                 | 226.2429245                                     | 769.9646226                                       | 0.408871745                              |
| 0.018389534                                                 | 200.706278                                      | 400.5829596                                       | 0.398926655                              |
| 0.026100215                                                 | 389.5955556                                     | 385.4444444                                       | 0.493962678                              |
| 0.006429626                                                 | 340.430593                                      | 1323.737197                                       | 0.213617389                              |
| 0.037444763                                                 | 186.5494881                                     | 228.3447099                                       | 0.419770774                              |
| 0.008435366                                                 | 293.9421594                                     | 744.7429306                                       | 0.333619211                              |
| 0.015703365                                                 | 309.7178571                                     | 224.8642857                                       | 0.481099656                              |
| 0.011015841                                                 | 255.4647887                                     | 658.0535211                                       | 0.2534809                                |
| 0.00473682                                                  | 441.3472373                                     | 1644.404117                                       | 0.353369066                              |
| 0.00557267                                                  | 452.7949367                                     | 685.9392405                                       | 0.459302326                              |
| 0.007520985                                                 | 289.4011976                                     | 945.6786427                                       | 0.366898572                              |
| 0.021178003                                                 | 389.7509579                                     | 186.5172414                                       | 0.542619543                              |
| 0.015018001                                                 | 221.8168421                                     | 433.0378947                                       | 0.394518272                              |
| 0.009921649                                                 | 436.3444816                                     | 274.1304348                                       | 0.430835735                              |
| 0.003913889                                                 | 565.9130833                                     | 961.9661482                                       | 0.315349106                              |
| 0.005654506                                                 | 438.7479675                                     | 576.300813                                        | 0.429169574                              |
| 0.013560826                                                 | 366.1278533                                     | 843.1284607                                       | 0.511614731                              |
| 0.008784551                                                 | 311.0100125                                     | 739.4055069                                       | 0.314319434                              |
| 0.007959739                                                 | 293.9552358                                     | 1182.958433                                       | 0.393519975                              |
| 0.015288716                                                 | 199.2794118                                     | 1646.489819                                       | 0.298145025                              |
| 0.006868881                                                 | 452.292887                                      | 877.5167364                                       | 0.470241023                              |
| 0.098776493                                                 | 307.8852459                                     | 45.6557377                                        | 0.586538462                              |
| 0.016034581                                                 | 376.2984293                                     | 161.6806283                                       | 0.575301205                              |
| 0.009033431                                                 | 297.8608059                                     | 726.8632479                                       | 0.405445545                              |
| 0.007094263                                                 | 377.6511254                                     | 1195.004823                                       | 0.431944444                              |
| 0.002560872                                                 | 778.5387812                                     | 1319.851801                                       | 0.43053071                               |
| 0.046855127                                                 | 207.9972067                                     | 290.0670391                                       | 0.428742515                              |
| 0.006157413                                                 | 467.7556468                                     | 457.9240246                                       | 0.464251668                              |
| 0.013805443                                                 | 390.8214905                                     | 480.7365685                                       | 0.391451832                              |
| 0.012294256                                                 | 314.0248756                                     | 353.3631841                                       | 0.421825813                              |
| 0.008274709                                                 | 360.8903924                                     | 663.3301759                                       | 0.450060901                              |
| 0.01785106                                                  | 320.4264392                                     | 407.6439232                                       | 0.457560976                              |
| 0.004958251                                                 | 486.0536913                                     | 787.2684564                                       | 0.476038339                              |
| 0.011219151                                                 | 229.9435294                                     | 812.8494118                                       | 0.381580879                              |
| 0.00240825                                                  | 950.4167852                                     | 1763.234234                                       | 0.494374121                              |
| 0.008817076                                                 | 351.4208754                                     | 287.1683502                                       | 0.509433962                              |
| 0.094714086                                                 | 251.3731343                                     | 49.98507463                                       | 0.5                                      |
| 0.008679982                                                 | 499.539749                                      | 197.4267782                                       | 0.480885312                              |
| 0.005371147                                                 | 394.0254545                                     | 1302.991273                                       | 0.401577103                              |
| 0.021550121                                                 | 267.0906736                                     | 360.8756477                                       | 0.466747279                              |
| 0.002795178                                                 | 704.3544872                                     | 1431.755128                                       | 0.408270086                              |
| 0.041647912                                                 | 198.3636364                                     | 237.4848485                                       | 0.446700508                              |
| 0.006387852                                                 | 326.7575758                                     | 1833.756531                                       | 0.293423272                              |
| 0.009077708                                                 | 474.87751                                       | 403.2811245                                       | 0.566552901                              |
| 0.0053497                                                   | 631.5106007                                     | 854.3674912                                       | 0.51618787                               |
| 0.012951592                                                 | 543.277037                                      | 465.0740741                                       | 0.522041763                              |
| 0.040246184                                                 | 314.3465909                                     | 303.8409091                                       | 0.432432432                              |
| 0.005333941                                                 | 710.4707602                                     | 338.0233918                                       | 0.388195233                              |
| 0.004504117                                                 | 515.7816456                                     | 869.5464135                                       | 0.44738084                               |
| 0.002553684                                                 | 719.6290606                                     | 2097.757682                                       | 0.415845199                              |
| 0.003767169                                                 | 531.7315634                                     | 966.3294002                                       | 0.329126214                              |
| 0.001935692                                                 | 2376.015896                                     | 666.4884393                                       | 0.253387038                              |
| 0.071196846                                                 | 165.1698113                                     | 96.47169811                                       | 0.488479263                              |
| 0.007525966                                                 | 422.0515759                                     | 615.5472779                                       | 0.449452672                              |
| 0.036722336                                                 | 326.4025974                                     | 174.4285714                                       | 0.586294416                              |
| 0.003624348                                                 | 560.9664929                                     | 1286.25242                                        | 0.420081326                              |
| 0.011343207                                                 | 364.118469                                      | 196.2654867                                       | 0.506726457                              |
| 0.0054721                                                   | 490.5497881                                     | 847.5105932                                       | 0.4694182                                |
| 0.004146841                                                 | 518.8830364                                     | 1144.425252                                       | 0.424671053                              |
| 0.008370606                                                 | 337.6198704                                     | 428.399568                                        | 0.410097431                              |
| 0.00446216                                                  | 449.7983294                                     | 1565.877088                                       | 0.324303406                              |
| 0.005771338                                                 | 350.4544139                                     | 1975.411963                                       | 0.308665873                              |
| 0.003002355                                                 | 617.0524919                                     | 3152.068711                                       | 0.369389978                              |
| 0.013626413                                                 | 492.8686709                                     | 520.164557                                        | 0.566308244                              |
| 0.017388193                                                 | 305.3495146                                     | 436.1805825                                       | 0.461056401                              |
| 0.030611245                                                 | 218.9763514                                     | 265.7297297                                       | 0.485245902                              |
| 0.011536727                                                 | 339.3476563                                     | 649.0026042                                       | 0.43537415                               |
| 0.008423585                                                 | 359.9902597                                     | 1068.571429                                       | 0.432888264                              |
| 0.009292037                                                 | 498.0545455                                     | 236.2072727                                       | 0.545634921                              |
| 0.005649266                                                 | 656.1409639                                     | 671.086747                                        | 0.618941089                              |
| 0.001290865                                                 | 2295.934828                                     | 1256.606167                                       | 0.511103152                              |
| 0.073820827                                                 | 303.125                                         | 54.77777778                                       | 0.496551724                              |
| 0.008072578                                                 | 289.3828358                                     | 1287.08806                                        | 0.395163669                              |
| 0.003005932                                                 | 711.1706587                                     | 1276.256287                                       | 0.304967129                              |
| 0.00785789                                                  | 387.547486                                      | 332.9441341                                       | 0.460154242                              |
| 0.007531592                                                 | 448.9430052                                     | 630.1683938                                       | 0.49742268                               |
| 0.015370708                                                 | 357.4782609                                     | 86.19565217                                       | 0.50273224                               |
| 0.041376                                                    | 400.7761194                                     | 56.07462687                                       | 0.638095238                              |
| 0.001825537                                                 | 1301.083706                                     | 1411.384665                                       | 0.393710692                              |
| 0.005372543                                                 | 669.5243243                                     | 356.2648649                                       | 0.52407932                               |
| 0.007175043                                                 | 473.5847826                                     | 393.6347826                                       | 0.450097847                              |
| 0.005829367                                                 | 429.6227621                                     | 1428.446292                                       | 0.382396088                              |
| 0.003973368                                                 | 490.7764006                                     | 1902.451661                                       | 0.347399242                              |
| 0.011402296                                                 | 668.3860759                                     | 115.9113924                                       | 0.624505929                              |
| 0.007995398                                                 | 579.4652087                                     | 479.5725646                                       | 0.413651316                              |
| 0.069662164                                                 | 300.7236842                                     | 64.94736842                                       | 0.617886179                              |
| 0.022513922                                                 | 245.3333333                                     | 115.4081633                                       | 0.387862797                              |
| 0.008248868                                                 | 422.9110429                                     | 297.3803681                                       | 0.403965304                              |



| log.sigma.1.5.mm.3D_gldzm_IntensityVariabilityNormalized | log.sigma.1.5.mm.3D_gldzm_LowIntensitySmallDistanceEmphasis | log.sigma.1.5.mm.3D_gldzm_IntensityVariability |
|----------------------------------------------------------|-------------------------------------------------------------|------------------------------------------------|
| 0.044474267                                              | 0.011838921                                                 | 15.9217871                                     |
| 0.047306015                                              | 0.004779877                                                 | 29.94470774                                    |
| 0.044233423                                              | 0.012676149                                                 | 9.81981982                                     |
| 0.038514282                                              | 0.003209904                                                 | 53.65039483                                    |
| 0.054076266                                              | 0.011394637                                                 | 8.435897436                                    |
| 0.055428847                                              | 0.00860259                                                  | 15.35379061                                    |
| 0.066093887                                              | 0.004510261                                                 | 9.18705036                                     |
| 0.042494024                                              | 0.006336817                                                 | 21.50197628                                    |
| 0.043409612                                              | 0.005544119                                                 | 41.36935992                                    |
| 0.04648493                                               | 0.004445015                                                 | 58.84992101                                    |
| 0.057055763                                              | 0.011249654                                                 | 20.19774011                                    |
| 0.039732101                                              | 0.003165353                                                 | 26.34238311                                    |
| 0.05489053                                               | 0.010193276                                                 | 46.54716981                                    |
| 0.058004384                                              | 0.013154279                                                 | 25.86995516                                    |
| 0.05091358                                               | 0.007436272                                                 | 22.91111111                                    |
| 0.055335983                                              | 0.005379678                                                 | 82.11859838                                    |
| 0.051986628                                              | 0.015430024                                                 | 15.23208191                                    |
| 0.051430403                                              | 0.007028741                                                 | 40.01285347                                    |
| 0.051760204                                              | 0.008629208                                                 | 14.49285714                                    |
| 0.059638961                                              | 0.009685527                                                 | 42.34366197                                    |
| 0.048091449                                              | 0.003792429                                                 | 88.77681473                                    |
| 0.049139561                                              | 0.004108673                                                 | 38.82025316                                    |
| 0.055039621                                              | 0.006493373                                                 | 55.1497006                                     |
| 0.042644706                                              | 0.011632562                                                 | 11.1302682                                     |
| 0.052622715                                              | 0.013117881                                                 | 24.99578947                                    |
| 0.044820528                                              | 0.008484144                                                 | 13.40133779                                    |
| 0.050730382                                              | 0.003365126                                                 | 55.44830741                                    |
| 0.045864234                                              | 0.005071022                                                 | 28.20650407                                    |
| 0.044202357                                              | 0.007388119                                                 | 39.91472868                                    |
| 0.046655629                                              | 0.007061061                                                 | 37.27784731                                    |
| 0.050744377                                              | 0.007018639                                                 | 63.48121503                                    |
| 0.060512684                                              | 0.010209312                                                 | 106.9864253                                    |
| 0.04109697                                               | 0.005835956                                                 | 39.28870293                                    |
| 0.057242677                                              | 0.010642242                                                 | 3.491803279                                    |
| 0.043831035                                              | 0.011908441                                                 | 8.371727749                                    |
| 0.052655119                                              | 0.006606122                                                 | 43.12454212                                    |
| 0.041034264                                              | 0.006403378                                                 | 51.04662379                                    |
| 0.046003714                                              | 0.002265353                                                 | 66.42936288                                    |
| 0.058893293                                              | 0.009309753                                                 | 21.08379888                                    |
| 0.044369205                                              | 0.005421401                                                 | 21.60780287                                    |
| 0.044949524                                              | 0.005297333                                                 | 25.93587522                                    |
| 0.049800748                                              | 0.007951453                                                 | 20.0199005                                     |
| 0.04878223                                               | 0.005693111                                                 | 36.05006766                                    |
| 0.045567169                                              | 0.010691074                                                 | 21.37100213                                    |
| 0.047450315                                              | 0.004018986                                                 | 42.42058166                                    |
| 0.053940484                                              | 0.01003144                                                  | 45.84941176                                    |
| 0.039725208                                              | 0.00185215                                                  | 83.78046468                                    |
| 0.049189992                                              | 0.008262487                                                 | 14.60942761                                    |
| 0.070617064                                              | 0.009367826                                                 | 4.731343284                                    |
| 0.04711052                                               | 0.006641453                                                 | 11.25941423                                    |
| 0.048458579                                              | 0.00459675                                                  | 66.63054545                                    |
| 0.051571854                                              | 0.009550418                                                 | 19.90673575                                    |
| 0.046493261                                              | 0.002393427                                                 | 72.52948718                                    |
| 0.057219927                                              | 0.018292039                                                 | 15.10606061                                    |
| 0.051962168                                              | 0.005589206                                                 | 99.45559039                                    |
| 0.038636474                                              | 0.005750464                                                 | 19.24096386                                    |
| 0.039960232                                              | 0.002942154                                                 | 45.23498233                                    |
| 0.044714403                                              | 0.002652757                                                 | 30.18222222                                    |
| 0.045196281                                              | 0.01171247                                                  | 15.90909091                                    |
| 0.060582743                                              | 0.005287493                                                 | 20.71929825                                    |
| 0.046346739                                              | 0.003753578                                                 | 43.93670886                                    |
| 0.042882217                                              | 0.002242504                                                 | 97.6856892                                     |
| 0.057170675                                              | 0.003467312                                                 | 58.1425762                                     |
| 0.055673427                                              | 0.001896173                                                 | 38.52601156                                    |
| 0.05749377                                               | 0.026106001                                                 | 6.094339623                                    |
| 0.042364184                                              | 0.005463658                                                 | 29.57020057                                    |
| 0.045857461                                              | 0.007998896                                                 | 10.59307359                                    |
| 0.046771295                                              | 0.003254712                                                 | 62.81384959                                    |
| 0.049768972                                              | 0.00887397                                                  | 11.24778761                                    |
| 0.042292086                                              | 0.004285505                                                 | 39.92372881                                    |
| 0.04770139                                               | 0.003228466                                                 | 61.58249419                                    |
| 0.05432222                                               | 0.006814772                                                 | 25.1511879                                     |
| 0.049225768                                              | 0.003801397                                                 | 82.50238663                                    |
| 0.053776893                                              | 0.005044471                                                 | 111.4794983                                    |
| 0.045173178                                              | 0.002625713                                                 | 153.1822471                                    |
| 0.040573426                                              | 0.003897749                                                 | 25.64240506                                    |
| 0.048641719                                              | 0.006085597                                                 | 25.05048544                                    |
| 0.048644083                                              | 0.018311629                                                 | 14.39864865                                    |
| 0.048065186                                              | 0.00740209                                                  | 36.9140625                                     |
| 0.044098657                                              | 0.006012548                                                 | 54.32954545                                    |
| 0.041560331                                              | 0.007018388                                                 | 11.42909091                                    |
| 0.035950065                                              | 0.004023877                                                 | 29.83855422                                    |
| 0.038181944                                              | 0.00116233                                                  | 54.4856342                                     |
| 0.05632716                                               | 0.008264654                                                 | 4.055555556                                    |
| 0.052307864                                              | 0.007562684                                                 | 70.09253731                                    |
| 0.053660583                                              | 0.002142625                                                 | 89.61317365                                    |
| 0.050731875                                              | 0.006656715                                                 | 18.16201117                                    |
| 0.046887165                                              | 0.004627952                                                 | 36.19689119                                    |
| 0.066398866                                              | 0.014156624                                                 | 6.108695652                                    |
| 0.051013589                                              | 0.037255229                                                 | 3.417910448                                    |
| 0.044672498                                              | 0.001615297                                                 | 69.91246006                                    |
| 0.036230825                                              | 0.005102994                                                 | 13.40540541                                    |
| 0.042873346                                              | 0.006075937                                                 | 19.72173913                                    |
| 0.048851721                                              | 0.00498374                                                  | 76.40409207                                    |
| 0.052022115                                              | 0.003564429                                                 | 104.9286068                                    |
| 0.035731453                                              | 0.009123166                                                 | 5.64556962                                     |
| 0.047480524                                              | 0.00781869                                                  | 23.88270378                                    |
| 0.052977839                                              | 0.008002084                                                 | 4.026315789                                    |
| 0.05502337                                               | 0.015458598                                                 | 8.088435374                                    |
| 0.040987617                                              | 0.007196605                                                 | 13.36196319                                    |

| log.sigma.1.5.mm.3D_gldzm_HighIntensityLargeDistanceEmphasis | log.sigma.1.5.mm.3D_gldzm_SmallDistanceEmphasis | log.sigma.1.5.mm.3D_gldzm_SumVariance | log.sigma.1.5.mm.3D_gldzm_Homogeneity1 |
|--------------------------------------------------------------|-------------------------------------------------|---------------------------------------|----------------------------------------|
| 377.9972067                                                  | 0.956005587                                     | 810.1146395                           | 0.257422574                            |
| 480.0663507                                                  | 0.963270142                                     | 1175.394137                           | 0.37253826                             |
| 264.7072072                                                  | 0.983108108                                     | 534.3358555                           | 0.272473123                            |
| 775.0064609                                                  | 0.947774587                                     | 1905.576283                           | 0.244980987                            |
| 267.7628205                                                  | 0.932692308                                     | 624.0692227                           | 0.299732546                            |
| 324.5270758                                                  | 0.953971119                                     | 779.873921                            | 0.293054602                            |
| 531.7122302                                                  | 0.848920863                                     | 1185.653304                           | 0.307106714                            |
| 456.56917                                                    | 0.939229249                                     | 1029.214307                           | 0.243194346                            |
| 461.1825813                                                  | 0.968520462                                     | 1143.777622                           | 0.271371354                            |
| 511.7780411                                                  | 0.975118483                                     | 1290.026452                           | 0.308663777                            |
| 265.4519774                                                  | 0.957627119                                     | 573.0164667                           | 0.294548397                            |
| 928.6998492                                                  | 0.959276018                                     | 2504.760284                           | 0.277508429                            |
| 253.8266509                                                  | 0.963738208                                     | 552.1623097                           | 0.307846702                            |
| 219.6345291                                                  | 0.959641256                                     | 452.5219004                           | 0.322142947                            |
| 473.0422222                                                  | 0.941666667                                     | 1107.880445                           | 0.263560203                            |
| 397.8268194                                                  | 0.957041779                                     | 866.1343971                           | 0.471891862                            |
| 219.5085324                                                  | 0.905290102                                     | 413.7955984                           | 0.295660957                            |
| 299.3753213                                                  | 0.983611825                                     | 724.6612643                           | 0.332610385                            |
| 362.55                                                       | 0.916964286                                     | 854.8705484                           | 0.271179301                            |
| 282.7183099                                                  | 0.971478873                                     | 619.7424218                           | 0.414977674                            |
| 506.7963164                                                  | 0.956527627                                     | 1150.860429                           | 0.349484831                            |
| 516.6303797                                                  | 0.946835443                                     | 1206.829496                           | 0.278276874                            |
| 305.9401198                                                  | 0.978293413                                     | 702.6565003                           | 0.346847556                            |
| 550.8544061                                                  | 0.870689655                                     | 1093.423024                           | 0.248762506                            |
| 248.7410526                                                  | 0.965263158                                     | 483.9709804                           | 0.335900994                            |
| 454.1337793                                                  | 0.967391304                                     | 1111.779706                           | 0.299971282                            |
| 681.4693504                                                  | 0.951967063                                     | 1655.596775                           | 0.37901709                             |
| 480.0650407                                                  | 0.975609756                                     | 1120.182128                           | 0.316655316                            |
| 399.4761905                                                  | 0.974252492                                     | 999.2480614                           | 0.262150641                            |
| 331.5894869                                                  | 0.970901126                                     | 783.8911493                           | 0.382750721                            |
| 313.8760991                                                  | 0.979016787                                     | 678.8732541                           | 0.321949985                            |
| 217.6713801                                                  | 0.973274887                                     | 455.6832326                           | 0.383900978                            |
| 502.5679916                                                  | 0.967834728                                     | 1214.945495                           | 0.265544859                            |
| 344.8196721                                                  | 0.889344262                                     | 837.149318                            | 0.243140015                            |
| 436.3141361                                                  | 0.937172775                                     | 945.1503882                           | 0.23415607                             |
| 338.5201465                                                  | 0.955128205                                     | 827.9254035                           | 0.298255134                            |
| 394.6213826                                                  | 0.984927653                                     | 925.3781282                           | 0.297973573                            |
| 881.9909972                                                  | 0.966239612                                     | 2394.080175                           | 0.290816826                            |
| 248.103352                                                   | 0.920391061                                     | 547.8176632                           | 0.299244607                            |
| 495.6057495                                                  | 0.976899384                                     | 1276.848577                           | 0.271569456                            |
| 487.9549393                                                  | 0.931109185                                     | 1064.50603                            | 0.324223817                            |
| 344.039801                                                   | 0.951492537                                     | 802.9488375                           | 0.286013308                            |
| 390.9878214                                                  | 0.959404601                                     | 1028.443116                           | 0.267794794                            |
| 345.5074627                                                  | 0.947228145                                     | 822.5686682                           | 0.268031816                            |
| 583.352349                                                   | 0.952181208                                     | 1439.817604                           | 0.263547284                            |
| 238.6788235                                                  | 0.983235294                                     | 512.5082607                           | 0.339755656                            |
| 1181.466572                                                  | 0.932432432                                     | 2996.761648                           | 0.261955028                            |
| 358.9057239                                                  | 0.987373737                                     | 895.0910988                           | 0.26681805                             |
| 275.238806                                                   | 0.888059701                                     | 596.0176791                           | 0.287648583                            |
| 583.3514644                                                  | 0.927824268                                     | 1459.682264                           | 0.25816468                             |
| 414.8487273                                                  | 0.979818182                                     | 1049.115938                           | 0.311167954                            |
| 278.2823834                                                  | 0.974740933                                     | 662.7173684                           | 0.270337142                            |
| 772.8583333                                                  | 0.967788462                                     | 2144.675998                           | 0.310278197                            |
| 209.5454545                                                  | 0.960227273                                     | 444.0523781                           | 0.302618517                            |
| 341.0005225                                                  | 0.983934169                                     | 844.1341933                           | 0.393005354                            |
| 590.9196787                                                  | 0.920180723                                     | 1281.57118                            | 0.224774698                            |
| 832.4363958                                                  | 0.892667845                                     | 1775.960199                           | 0.242095257                            |
| 773.0548148                                                  | 0.855555556                                     | 1626.269888                           | 0.250658958                            |
| 338.4659091                                                  | 0.944602273                                     | 792.4526211                           | 0.309119418                            |
| 719.0321637                                                  | 0.995614035                                     | 2147.592352                           | 0.227103249                            |
| 557.443038                                                   | 0.967563291                                     | 1397.330712                           | 0.278346716                            |
| 813.5535558                                                  | 0.9690518                                       | 2203.426619                           | 0.301430441                            |
| 566.560472                                                   | 0.980825959                                     | 1516.648504                           | 0.369866938                            |
| 2478.015896                                                  | 0.985910405                                     | 8524.485486                           | 0.423179456                            |
| 168.7075472                                                  | 0.964622642                                     | 327.7929973                           | 0.298226498                            |
| 494.3868195                                                  | 0.952722063                                     | 1133.79493                            | 0.278330946                            |
| 404.0779221                                                  | 0.892857143                                     | 892.9840073                           | 0.231519595                            |
| 582.2993299                                                  | 0.983804914                                     | 1615.417972                           | 0.295286971                            |
| 395.699115                                                   | 0.946902655                                     | 996.3230193                           | 0.261138803                            |
| 553.0540254                                                  | 0.959480932                                     | 1334.076049                           | 0.273142463                            |
| 586.6328428                                                  | 0.95468629                                      | 1433.613918                           | 0.298790319                            |
| 360.5831533                                                  | 0.970842333                                     | 886.194325                            | 0.290106049                            |
| 483.8812649                                                  | 0.97449284                                      | 1170.406881                           | 0.354825185                            |
| 367.8914616                                                  | 0.981910275                                     | 902.2545503                           | 0.363587307                            |
| 691.7764671                                                  | 0.972574462                                     | 1899.059444                           | 0.333967186                            |
| 594.460443                                                   | 0.926424051                                     | 1407.608329                           | 0.227566388                            |
| 358.9009709                                                  | 0.937378641                                     | 788.9122337                           | 0.272883966                            |
| 229.222973                                                   | 0.959459459                                     | 462.8793563                           | 0.275128746                            |
| 395.5234375                                                  | 0.936523438                                     | 871.4405445                           | 0.27974143                             |
| 427.6972403                                                  | 0.946428571                                     | 905.7216197                           | 0.288302318                            |
| 543.6436364                                                  | 0.942727273                                     | 1287.883854                           | 0.241467053                            |
| 841.053012                                                   | 0.919578313                                     | 1970.33817                            | 0.210737594                            |
| 2742.957954                                                  | 0.95217239                                      | 7925.526451                           | 0.251610461                            |
| 336.5833333                                                  | 0.895833333                                     | 763.5536867                           | 0.293667462                            |
| 306.4828358                                                  | 0.98488806                                      | 740.8102636                           | 0.310452487                            |
| 1048.922156                                                  | 0.89760479                                      | 2206.980533                           | 0.360302079                            |
| 414.4134078                                                  | 0.972765363                                     | 1008.013884                           | 0.278876652                            |
| 518.9145078                                                  | 0.923251295                                     | 1265.806201                           | 0.250459508                            |
| 374.0108696                                                  | 0.975543478                                     | 1000.965771                           | 0.298148922                            |
| 445.0149254                                                  | 0.932835821                                     | 1193.8912                             | 0.238668141                            |
| 1468.301597                                                  | 0.961182109                                     | 4390.713464                           | 0.314780175                            |
| 689.4783784                                                  | 0.985810811                                     | 1824.992884                           | 0.244727488                            |
| 593.5782609                                                  | 0.941304348                                     | 1304.577675                           | 0.31984705                             |
| 479.7078005                                                  | 0.965952685                                     | 1167.13637                            | 0.320318887                            |
| 525.0704016                                                  | 0.978061477                                     | 1330.323035                           | 0.339481921                            |
| 846.5063291                                                  | 0.881329114                                     | 1888.964295                           | 0.208596871                            |
| 628.359841                                                   | 0.982107356                                     | 1890.330775                           | 0.299657343                            |
| 307.1973684                                                  | 0.940789474                                     | 731.409132                            | 0.246185687                            |
| 288.9251701                                                  | 0.908163265                                     | 665.0295518                           | 0.31138274                             |
| 453.601227                                                   | 0.965490798                                     | 1014.20402                            | 0.317461811                            |

| log.sigma.1.5.mm.3D_glcml_Homogeneity2 | log.sigma.1.5.mm.3D_glcml_ClusterShade | log.sigma.1.5.mm.3D_glcml_MaximumProbability | log.sigma.1.5.mm.3D_glcml_Idmn | log.sigma.1.5.mm.3D_glcml_SumVariance2 |
|----------------------------------------|----------------------------------------|----------------------------------------------|--------------------------------|----------------------------------------|
| 0.171205111                            | 175.665541                             | 0.016809108                                  | 0.959199173                    | 65.52915015                            |
| 0.299168825                            | 98.47400915                            | 0.064261586                                  | 0.973836938                    | 41.50485267                            |
| 0.187827273                            | 439.645076                             | 0.019487154                                  | 0.953270673                    | 68.19068149                            |
| 0.160527685                            | 129.7024892                            | 0.01167774                                   | 0.966277058                    | 91.52081255                            |
| 0.208762596                            | 12.82316588                            | 0.019931318                                  | 0.967442766                    | 51.79131228                            |
| 0.202700577                            | 26.97063636                            | 0.014757998                                  | 0.961833278                    | 44.06860873                            |
| 0.218922819                            | -186.4526613                           | 0.031867822                                  | 0.959287239                    | 37.10417758                            |
| 0.156175924                            | 51.74853373                            | 0.009113042                                  | 0.951421039                    | 76.07298559                            |
| 0.182483263                            | 51.67715136                            | 0.009798237                                  | 0.962860091                    | 63.37618496                            |
| 0.222631112                            | 190.0406984                            | 0.025365129                                  | 0.977511888                    | 50.86381542                            |
| 0.202873004                            | -3.813470295                           | 0.014128361                                  | 0.953231739                    | 41.37447239                            |
| 0.191254267                            | 187.6468019                            | 0.016858255                                  | 0.977945382                    | 66.06079031                            |
| 0.217266153                            | 70.8436372                             | 0.013340855                                  | 0.974245148                    | 39.73444739                            |
| 0.233221628                            | 56.56709369                            | 0.0187218                                    | 0.9587844                      | 40.27904116                            |
| 0.170922406                            | -16.63890424                           | 0.013387953                                  | 0.965489438                    | 48.81646055                            |
| 0.414064703                            | 111.8117742                            | 0.125617323                                  | 0.987388703                    | 25.7456058                             |
| 0.204526532                            | 9.621031418                            | 0.012385086                                  | 0.953377293                    | 49.35183409                            |
| 0.246693208                            | 114.7516354                            | 0.021361862                                  | 0.970319388                    | 43.53699612                            |
| 0.179695474                            | -29.94729704                           | 0.015787581                                  | 0.956241128                    | 62.77472455                            |
| 0.343190116                            | 54.07267164                            | 0.06508364                                   | 0.975076234                    | 28.00757505                            |
| 0.269193756                            | 118.3112911                            | 0.0547603                                    | 0.977967721                    | 34.58110566                            |
| 0.186248532                            | 226.3874303                            | 0.012713897                                  | 0.975311401                    | 52.90004187                            |
| 0.264006993                            | 102.7793382                            | 0.032284129                                  | 0.97027163                     | 36.91394055                            |
| 0.160704806                            | -120.6989213                           | 0.01481581                                   | 0.953997994                    | 67.10038873                            |
| 0.252624645                            | 129.2215561                            | 0.029413243                                  | 0.977338088                    | 37.25892363                            |
| 0.216312986                            | 105.9047341                            | 0.023375041                                  | 0.962340505                    | 53.37983302                            |
| 0.303927006                            | 91.91758932                            | 0.057194716                                  | 0.983086787                    | 34.52872333                            |
| 0.232159146                            | 271.3930331                            | 0.024832233                                  | 0.974454554                    | 47.12404358                            |
| 0.174483741                            | -70.88966557                           | 0.009206067                                  | 0.95227601                     | 69.06015535                            |
| 0.31074109                             | 105.4933866                            | 0.065782245                                  | 0.977019715                    | 37.52077651                            |
| 0.23639792                             | 161.4284847                            | 0.027435071                                  | 0.976856017                    | 38.87751113                            |
| 0.303059652                            | 81.39095133                            | 0.041966216                                  | 0.978484887                    | 29.40010715                            |
| 0.178960282                            | 151.6940625                            | 0.011394455                                  | 0.96729624                     | 73.94482672                            |
| 0.155723641                            | -360.0826903                           | 0.034207999                                  | 0.942356644                    | 81.64784636                            |
| 0.146673518                            | -84.21068784                           | 0.013176081                                  | 0.935293127                    | 78.86311109                            |
| 0.208424602                            | -13.57446162                           | 0.01199588                                   | 0.962652664                    | 46.92540641                            |
| 0.216774179                            | 281.1417383                            | 0.035890091                                  | 0.96658348                     | 62.48084752                            |
| 0.204946848                            | 7.606195024                            | 0.020906116                                  | 0.975460363                    | 49.85205214                            |
| 0.208550921                            | -80.1851794                            | 0.016562047                                  | 0.955075121                    | 42.90190738                            |
| 0.18425631                             | 146.960658                             | 0.012807486                                  | 0.967755316                    | 61.67925082                            |
| 0.244580031                            | 62.19744051                            | 0.03764423                                   | 0.966167239                    | 45.53901949                            |
| 0.196053289                            | 9.037268811                            | 0.013874427                                  | 0.959106868                    | 55.48066488                            |
| 0.177990831                            | -29.31641223                           | 0.009014934                                  | 0.959740961                    | 56.33481602                            |
| 0.179093721                            | 41.44662476                            | 0.013006102                                  | 0.956578302                    | 65.4002081                             |
| 0.172715797                            | 3.589211371                            | 0.010145364                                  | 0.968982138                    | 59.13732805                            |
| 0.255732769                            | 124.2427113                            | 0.03083169                                   | 0.972781221                    | 35.84824844                            |
| 0.175727343                            | 121.7169387                            | 0.012772361                                  | 0.975111865                    | 74.13518633                            |
| 0.176357294                            | 55.11871686                            | 0.013293877                                  | 0.958717255                    | 52.64087123                            |
| 0.198861016                            | -364.8739293                           | 0.035194267                                  | 0.952835764                    | 62.50179232                            |
| 0.168328613                            | -24.06958751                           | 0.014766308                                  | 0.965250428                    | 65.8072062                             |
| 0.226103206                            | 86.77047824                            | 0.02790198                                   | 0.97194342                     | 42.836741                              |
| 0.180519966                            | -30.86501499                           | 0.012753292                                  | 0.950204696                    | 59.12942843                            |
| 0.227352331                            | 78.48873325                            | 0.027273511                                  | 0.981115664                    | 50.21437861                            |
| 0.211176005                            | 43.47189596                            | 0.017076639                                  | 0.962283466                    | 40.11659324                            |
| 0.32239013                             | 78.0822342                             | 0.074547831                                  | 0.978234206                    | 36.57506865                            |
| 0.138248336                            | 144.7342526                            | 0.00892148                                   | 0.948788101                    | 93.55000355                            |
| 0.155359707                            | 2.141026329                            | 0.007579247                                  | 0.965154153                    | 90.62707974                            |
| 0.162525188                            | -288.8961236                           | 0.011111375                                  | 0.957437945                    | 77.97278143                            |
| 0.226300422                            | -20.37731706                           | 0.032033278                                  | 0.968997267                    | 48.75891661                            |
| 0.238301053                            | 13.77701751                            | 0.02454491                                   | 0.982219995                    | 35.53303964                            |
| 0.188559153                            | 166.4560694                            | 0.01635452                                   | 0.970846318                    | 56.98630363                            |
| 0.218638424                            | 200.6060949                            | 0.028715456                                  | 0.977976411                    | 61.44138679                            |
| 0.291082479                            | 57.01557541                            | 0.047433789                                  | 0.980853093                    | 32.22218577                            |
| 0.356130806                            | -178.9275277                           | 0.082575486                                  | 0.992555048                    | 33.03641651                            |
| 0.205997634                            | 53.95594983                            | 0.022034367                                  | 0.939969508                    | 46.59953927                            |
| 0.194605181                            | 127.1023076                            | 0.016186605                                  | 0.96217106                     | 66.94735713                            |
| 0.142138196                            | -164.1001417                           | 0.013492947                                  | 0.936142286                    | 71.90984112                            |
| 0.208747773                            | 86.36662793                            | 0.013399618                                  | 0.97724318                     | 60.83735801                            |
| 0.168580188                            | -22.49933786                           | 0.013998326                                  | 0.952661358                    | 52.99282838                            |
| 0.187821062                            | 174.0169294                            | 0.013072317                                  | 0.971276539                    | 71.78926547                            |
| 0.210994335                            | 159.3935131                            | 0.014558261                                  | 0.971633739                    | 50.66037673                            |
| 0.199308683                            | 45.17111712                            | 0.012435659                                  | 0.966318882                    | 47.18971303                            |
| 0.275126118                            | 141.6508402                            | 0.045926531                                  | 0.97775604                     | 37.99193802                            |
| 0.28457736                             | 100.8913907                            | 0.043722782                                  | 0.984960556                    | 31.96619616                            |
| 0.254089977                            | 69.97492565                            | 0.028079338                                  | 0.980921898                    | 48.08501172                            |
| 0.139144531                            | -34.62691597                           | 0.007228926                                  | 0.95805462                     | 89.16457593                            |
| 0.181802286                            | 8.038081104                            | 0.011458788                                  | 0.96094534                     | 52.76166693                            |
| 0.185940656                            | 161.5508346                            | 0.014478238                                  | 0.946060064                    | 57.82636392                            |
| 0.191263464                            | 39.04174655                            | 0.011192332                                  | 0.958395739                    | 53.40117323                            |
| 0.202502854                            | 182.5695475                            | 0.021131895                                  | 0.973799782                    | 55.06286662                            |
| 0.151456979                            | 136.7627865                            | 0.013354699                                  | 0.958043819                    | 75.12740455                            |
| 0.125164423                            | -121.207382                            | 0.0068519                                    | 0.958240958                    | 109.8159519                            |
| 0.169335775                            | -44.37965215                           | 0.015820504                                  | 0.981931527                    | 97.42571096                            |
| 0.206422591                            | -156.3184815                           | 0.031294343                                  | 0.951401659                    | 64.85531053                            |
| 0.222912389                            | 56.34544097                            | 0.019052996                                  | 0.969473942                    | 41.85649658                            |
| 0.280146162                            | 128.758246                             | 0.043525461                                  | 0.988520773                    | 32.07524148                            |
| 0.187988145                            | 82.46841567                            | 0.013356002                                  | 0.960456133                    | 49.34277898                            |
| 0.160123042                            | -66.75393084                           | 0.008812563                                  | 0.952950079                    | 67.10060575                            |
| 0.208539867                            | -52.22282604                           | 0.029373568                                  | 0.957015276                    | 37.94989592                            |
| 0.153514215                            | -450.7211309                           | 0.038005405                                  | 0.922832312                    | 78.76645883                            |
| 0.233843825                            | -138.5362697                           | 0.028080525                                  | 0.982450006                    | 56.68595971                            |
| 0.159311139                            | 373.1099101                            | 0.011351485                                  | 0.963911282                    | 89.7022451                             |
| 0.242265254                            | 91.07949207                            | 0.046867766                                  | 0.967327884                    | 55.29444223                            |
| 0.236561539                            | 124.5996609                            | 0.022817898                                  | 0.977742441                    | 42.00412562                            |
| 0.255895675                            | 99.39602974                            | 0.032189341                                  | 0.984264009                    | 39.37513145                            |
| 0.124055948                            | 213.0555298                            | 0.013603905                                  | 0.948863654                    | 132.850819                             |
| 0.212157287                            | -256.6917505                           | 0.015515637                                  | 0.97553568                     | 57.96316309                            |
| 0.155880832                            | -159.7742715                           | 0.024919553                                  | 0.9300766                      | 78.78013474                            |
| 0.219911671                            | 8.157932549                            | 0.018004612                                  | 0.969358306                    | 42.45228718                            |
| 0.235473153                            | 426.8406467                            | 0.024328488                                  | 0.969893921                    | 59.19562205                            |

| log.sigma.1.5.mm.3D_glc_m_Contrast | log.sigma.1.5.mm.3D_glc_m_DifferenceEntropy | log.sigma.1.5.mm.3D_glc_m_InverseVariance | log.sigma.1.5.mm.3D_glc_m_Entropy | log.sigma.1.5.mm.3D_glc_m_Dissimilarity |
|------------------------------------|---------------------------------------------|-------------------------------------------|-----------------------------------|-----------------------------------------|
| 66.93650826                        | 4.072905801                                 | 0.170085881                               | 8.34959375                        | 6.311179441                             |
| 38.17321281                        | 3.618879273                                 | 0.269436489                               | 7.730913426                       | 4.247640631                             |
| 68.02951252                        | 4.026551995                                 | 0.194035815                               | 7.850875232                       | 6.111489905                             |
| 87.31854448                        | 4.274112836                                 | 0.165533354                               | 9.169565988                       | 7.05995223                              |
| 34.88077295                        | 3.603051652                                 | 0.214516966                               | 7.565563651                       | 4.565186773                             |
| 38.71597626                        | 3.71862995                                  | 0.202367856                               | 7.941402761                       | 4.828643659                             |
| 40.14657319                        | 3.659445268                                 | 0.22062112                                | 7.213700233                       | 4.71255255                              |
| 72.65254069                        | 4.135427012                                 | 0.160913585                               | 8.665285765                       | 6.654891067                             |
| 54.52848059                        | 3.958721604                                 | 0.186618126                               | 8.639094224                       | 5.642552584                             |
| 45.74159263                        | 3.812813686                                 | 0.221639453                               | 8.24289882                        | 4.924513513                             |
| 36.60785595                        | 3.677570278                                 | 0.202852792                               | 7.934380474                       | 4.705399711                             |
| 65.43883893                        | 4.02925663                                  | 0.194938853                               | 8.449051461                       | 5.90611675                              |
| 32.51108937                        | 3.603614184                                 | 0.224893798                               | 8.009735207                       | 4.381248692                             |
| 29.51336082                        | 3.520972709                                 | 0.235297827                               | 7.848992436                       | 4.155682745                             |
| 50.46039868                        | 3.885501224                                 | 0.177515026                               | 8.214975748                       | 5.501568049                             |
| 23.51159248                        | 3.149652521                                 | 0.340399543                               | 6.648986369                       | 2.943729669                             |
| 36.50943918                        | 3.659526724                                 | 0.207306389                               | 7.981048982                       | 4.689782018                             |
| 32.18668948                        | 3.568717408                                 | 0.248370553                               | 7.990546719                       | 4.170261249                             |
| 48.60929727                        | 3.840308108                                 | 0.182044474                               | 8.136154329                       | 5.396570081                             |
| 22.19212277                        | 3.270290397                                 | 0.303903365                               | 7.259598472                       | 3.223105142                             |
| 34.93985978                        | 3.632001015                                 | 0.254295799                               | 7.753042265                       | 4.231172516                             |
| 45.47023474                        | 3.81819551                                  | 0.190328728                               | 8.290975554                       | 5.168256247                             |
| 30.02771491                        | 3.523209414                                 | 0.257978212                               | 7.744445071                       | 4.015441894                             |
| 68.93446298                        | 4.077107913                                 | 0.163830136                               | 8.164821256                       | 6.425060703                             |
| 36.35231023                        | 3.624140811                                 | 0.250686197                               | 7.655847578                       | 4.326062601                             |
| 53.75165347                        | 3.886043777                                 | 0.171571542                               | 7.971439385                       | 5.340898853                             |
| 30.92911869                        | 3.504300181                                 | 0.284582446                               | 7.613822929                       | 3.83835072                              |
| 45.80521859                        | 3.782644799                                 | 0.232217663                               | 7.904780717                       | 4.848104391                             |
| 64.99012086                        | 4.027835954                                 | 0.17927318                                | 8.664248857                       | 6.109796866                             |
| 35.39515803                        | 3.551412629                                 | 0.288456536                               | 7.569314504                       | 4.013669284                             |
| 38.97886946                        | 3.703734509                                 | 0.234710516                               | 7.930919376                       | 4.544705146                             |
| 19.83674415                        | 3.26100349                                  | 0.289823436                               | 7.444448749                       | 3.245639181                             |
| 67.83915105                        | 4.093838931                                 | 0.179591707                               | 8.802115873                       | 6.186813624                             |
| 74.90164819                        | 3.902447174                                 | 0.158574033                               | 6.496713642                       | 6.709737333                             |
| 80.92039761                        | 4.137333376                                 | 0.151106373                               | 8.029415439                       | 6.990323644                             |
| 38.16541727                        | 3.711900595                                 | 0.216181439                               | 8.220464275                       | 4.718745812                             |
| 60.5756521                         | 4.006737704                                 | 0.205098908                               | 8.476746812                       | 5.699404234                             |
| 49.47031682                        | 3.901996749                                 | 0.20391715                                | 8.422977034                       | 5.308234143                             |
| 34.75535977                        | 3.613249077                                 | 0.211877467                               | 7.88785833                        | 4.59672033                              |
| 57.46522404                        | 3.979198369                                 | 0.187096865                               | 8.392652983                       | 5.778132139                             |
| 47.67626036                        | 3.807385454                                 | 0.243237518                               | 8.033090403                       | 4.938437983                             |
| 45.21036416                        | 3.819908328                                 | 0.197189986                               | 8.226885871                       | 5.132357921                             |
| 52.84982337                        | 3.92336285                                  | 0.179922987                               | 8.469073825                       | 5.633499552                             |
| 58.53631177                        | 3.977221908                                 | 0.184457721                               | 8.456744561                       | 5.792403545                             |
| 55.13889247                        | 3.967558611                                 | 0.173473381                               | 8.562246261                       | 5.726335485                             |
| 31.10979396                        | 3.551809743                                 | 0.255629495                               | 7.732019158                       | 4.090959927                             |
| 71.23418769                        | 4.136632507                                 | 0.181751014                               | 8.979328716                       | 6.2954952                               |
| 51.04303028                        | 3.891972859                                 | 0.177939693                               | 8.114292187                       | 5.576640758                             |
| 46.74286831                        | 3.666251059                                 | 0.204316507                               | 6.599139624                       | 5.172922184                             |
| 59.07754801                        | 3.969377923                                 | 0.168348019                               | 8.101912462                       | 5.962816621                             |
| 42.77315309                        | 3.78441812                                  | 0.222572214                               | 8.218959397                       | 4.842734561                             |
| 52.44477082                        | 3.899514039                                 | 0.181767008                               | 8.241752597                       | 5.592666567                             |
| 46.69759183                        | 3.835661193                                 | 0.223237095                               | 8.354434049                       | 5.039174679                             |
| 33.4705449                         | 3.607212777                                 | 0.217949297                               | 7.781607748                       | 4.469134358                             |
| 33.24142322                        | 3.497629936                                 | 0.290928546                               | 7.562592285                       | 3.880265865                             |
| 91.26514954                        | 4.294052256                                 | 0.14099918                                | 8.861323741                       | 7.439820042                             |
| 79.06176153                        | 4.183437313                                 | 0.163207648                               | 9.02575398                        | 6.818369313                             |
| 71.44906822                        | 4.103728602                                 | 0.174786579                               | 8.651094758                       | 6.403173962                             |
| 48.3040679                         | 3.822172054                                 | 0.231573903                               | 7.960761024                       | 5.049853849                             |
| 29.52446035                        | 3.488111985                                 | 0.247662156                               | 7.548529702                       | 4.033621475                             |
| 49.09247836                        | 3.883044424                                 | 0.195468575                               | 8.461677151                       | 5.339110041                             |
| 55.53005529                        | 3.952095967                                 | 0.211017913                               | 8.622503855                       | 5.428248289                             |
| 28.71406082                        | 3.471244707                                 | 0.27530625                                | 7.594164769                       | 3.786167611                             |
| 29.14122996                        | 3.322051336                                 | 0.31315679                                | 7.133457468                       | 3.419056125                             |
| 35.29000787                        | 3.579471551                                 | 0.212574562                               | 7.211257747                       | 4.579595881                             |
| 66.0280825                         | 4.052803892                                 | 0.197167809                               | 8.60133736                        | 6.0171272                               |
| 73.68357795                        | 4.106140799                                 | 0.146945704                               | 8.130949414                       | 6.78870241                              |
| 47.8803784                         | 3.860234787                                 | 0.210420655                               | 8.534967425                       | 5.170549638                             |
| 49.2821041                         | 3.860851199                                 | 0.175358574                               | 7.975398491                       | 5.520942475                             |
| 64.63690043                        | 4.049925272                                 | 0.191630338                               | 8.683729861                       | 5.998549183                             |
| 43.1341269                         | 3.772330432                                 | 0.21982693                                | 8.286689104                       | 4.913126532                             |
| 41.13610561                        | 3.75672004                                  | 0.203907607                               | 8.141404464                       | 4.915022696                             |
| 35.56150614                        | 3.622463973                                 | 0.254679288                               | 7.859759964                       | 4.207951177                             |
| 29.87697189                        | 3.501503332                                 | 0.280666855                               | 7.635826963                       | 3.859559487                             |
| 46.07443136                        | 3.776583904                                 | 0.251535769                               | 8.258322888                       | 4.743001848                             |
| 83.44051996                        | 4.235461473                                 | 0.142802087                               | 8.898869903                       | 7.122008287                             |
| 48.36927936                        | 3.860122536                                 | 0.18672025                                | 8.297631299                       | 5.373085977                             |
| 50.35187494                        | 3.878052875                                 | 0.190599321                               | 8.069469895                       | 5.457562417                             |
| 48.7005318                         | 3.870933004                                 | 0.195305606                               | 8.379378859                       | 5.364796218                             |
| 53.23682579                        | 3.932266424                                 | 0.202130895                               | 8.437832985                       | 5.460734653                             |
| 69.49417731                        | 4.074292348                                 | 0.157583769                               | 8.2494737                         | 6.466173803                             |
| 105.2008894                        | 4.402520382                                 | 0.133831705                               | 9.176967415                       | 8.010340311                             |
| 95.11627521                        | 4.313632242                                 | 0.172413903                               | 9.148138114                       | 7.193562007                             |
| 44.98069592                        | 3.638637674                                 | 0.21206862                                | 6.797482701                       | 5.075152601                             |
| 37.00700615                        | 3.691298136                                 | 0.224699418                               | 8.11638887                        | 4.593810989                             |
| 30.6523587                         | 3.50228194                                  | 0.281246993                               | 7.614960522                       | 3.863212944                             |
| 43.19071785                        | 3.778407191                                 | 0.199648715                               | 8.049542019                       | 5.103051879                             |
| 58.82324949                        | 4.003449066                                 | 0.165010217                               | 8.626988098                       | 6.042993972                             |
| 35.87286381                        | 3.430961293                                 | 0.22075837                                | 6.896316012                       | 4.636855333                             |
| 89.24166903                        | 3.956329209                                 | 0.158522885                               | 6.490208972                       | 7.20988663                              |
| 53.54238106                        | 3.891957714                                 | 0.226550127                               | 8.404617422                       | 5.217046142                             |
| 86.98170616                        | 4.237299373                                 | 0.160709573                               | 8.513585101                       | 7.022940022                             |
| 56.92563532                        | 3.916546584                                 | 0.228812533                               | 8.067349687                       | 5.369942749                             |
| 43.24433651                        | 3.770364404                                 | 0.233007109                               | 8.225356025                       | 4.753905259                             |
| 34.24095799                        | 3.61312573                                  | 0.252979626                               | 7.981859464                       | 4.211554249                             |
| 121.776546                         | 4.354489785                                 | 0.125718416                               | 7.931065562                       | 8.517774489                             |
| 48.41848296                        | 3.826661504                                 | 0.211765648                               | 8.176078064                       | 5.070530487                             |
| 62.55540809                        | 3.859856919                                 | 0.158416468                               | 6.86466152                        | 6.230690491                             |
| 30.56557371                        | 3.52534057                                  | 0.22174914                                | 7.491786657                       | 4.26866117                              |
| 55.56284326                        | 3.858953809                                 | 0.230710115                               | 7.844757815                       | 5.194228527                             |

| log.sigma.1.5.mm.3D_glc_m_DifferenceVariance | log.sigma.1.5.mm.3D_glc_m_Idn | log.sigma.1.5.mm.3D_glc_m_Idm | log.sigma.1.5.mm.3D_glc_m_Correlation | log.sigma.1.5.mm.3D_glc_m_Autocorrelation |
|----------------------------------------------|-------------------------------|-------------------------------|---------------------------------------|-------------------------------------------|
| 26.77607722                                  | 0.868514112                   | 0.171205111                   | -0.004688833                          | 259.7708323                               |
| 19.8561612                                   | 0.90428365                    | 0.299168825                   | 0.046876009                           | 367.1925981                               |
| 30.37768584                                  | 0.865115273                   | 0.187827273                   | 0.005632127                           | 175.0880523                               |
| 37.18600194                                  | 0.881607422                   | 0.160527685                   | 0.030591601                           | 573.6103384                               |
| 13.72293896                                  | 0.880512849                   | 0.208762596                   | 0.195606186                           | 209.4440832                               |
| 15.26828381                                  | 0.87146819                    | 0.202700577                   | 0.066126798                           | 254.5544917                               |
| 17.46375659                                  | 0.872213738                   | 0.218922819                   | -0.026546988                          | 366.4445764                               |
| 28.03504373                                  | 0.856237629                   | 0.156175924                   | 0.029877637                           | 324.4811707                               |
| 22.4835869                                   | 0.874826676                   | 0.182483263                   | 0.080607163                           | 360.8191004                               |
| 21.35908209                                  | 0.904768086                   | 0.222631112                   | 0.055767446                           | 401.3680875                               |
| 14.21407649                                  | 0.858695312                   | 0.202873004                   | 0.060813932                           | 193.3841612                               |
| 30.1647851                                   | 0.905349579                   | 0.191254267                   | 0.007853453                           | 738.6947868                               |
| 13.07028649                                  | 0.893217602                   | 0.217266153                   | 0.102240144                           | 188.063836                                |
| 11.93039929                                  | 0.868752338                   | 0.233221628                   | 0.153346141                           | 158.3700628                               |
| 20.03220961                                  | 0.876643792                   | 0.170922406                   | -0.090924752                          | 348.1940548                               |
| 14.71733373                                  | 0.939087821                   | 0.414064703                   | 0.051632297                           | 273.5607351                               |
| 14.09501797                                  | 0.859172752                   | 0.204526532                   | 0.148736883                           | 145.4922249                               |
| 14.49695748                                  | 0.890818117                   | 0.246693208                   | 0.151365315                           | 240.1265057                               |
| 19.00419069                                  | 0.863115166                   | 0.179695474                   | 0.131882013                           | 277.0997477                               |
| 11.58493313                                  | 0.90620619                    | 0.343190116                   | 0.115010292                           | 207.2807851                               |
| 16.96858281                                  | 0.907531002                   | 0.269193756                   | -0.001403398                          | 359.2625032                               |
| 18.35185568                                  | 0.895164575                   | 0.186248532                   | 0.080296513                           | 378.1238571                               |
| 13.59608145                                  | 0.891483724                   | 0.264006993                   | 0.103521392                           | 232.4421257                               |
| 27.28374414                                  | 0.860525626                   | 0.160704806                   | -0.005284219                          | 341.7478145                               |
| 17.46414071                                  | 0.905613014                   | 0.252624645                   | 0.014241951                           | 165.1735117                               |
| 24.90995488                                  | 0.879485915                   | 0.216312986                   | 0.001298587                           | 348.2086302                               |
| 16.13135087                                  | 0.920951273                   | 0.303927006                   | 0.056232571                           | 501.4427215                               |
| 22.10111309                                  | 0.900638363                   | 0.232159146                   | 0.018594791                           | 350.5908608                               |
| 26.43068439                                  | 0.86082381                    | 0.174483741                   | 0.040803977                           | 316.8663663                               |
| 19.15252233                                  | 0.911154845                   | 0.31074109                    | 0.033677384                           | 254.0720715                               |
| 18.17721297                                  | 0.903340346                   | 0.23639792                    | 0.00330834                            | 223.4320535                               |
| 9.142471226                                  | 0.90657502                    | 0.303059652                   | 0.193597145                           | 159.561683                                |
| 29.26570935                                  | 0.883938906                   | 0.178960282                   | 0.049490525                           | 379.5538211                               |
| 29.27515368                                  | 0.845525835                   | 0.155723641                   | 0.052684331                           | 259.0830543                               |
| 31.12991047                                  | 0.836552685                   | 0.146673518                   | -0.003928686                          | 296.1531239                               |
| 15.747244                                    | 0.874460604                   | 0.208424602                   | 0.105212349                           | 270.056058                                |
| 27.75626983                                  | 0.885915302                   | 0.216774179                   | 0.021545732                           | 294.8468825                               |
| 21.21674509                                  | 0.897586513                   | 0.204946848                   | 0.009684633                           | 709.1841312                               |
| 12.89711821                                  | 0.861250872                   | 0.208550921                   | 0.107872929                           | 186.2731949                               |
| 23.88370627                                  | 0.883004201                   | 0.18425631                    | 0.040417446                           | 397.2181999                               |
| 23.08052729                                  | 0.887682159                   | 0.244580031                   | -0.016227952                          | 335.0285559                               |
| 18.67434328                                  | 0.869197165                   | 0.196053289                   | 0.104878257                           | 262.0626813                               |
| 20.56587901                                  | 0.868483619                   | 0.177990831                   | 0.03794796                            | 326.295287                                |
| 24.48334627                                  | 0.866545666                   | 0.179093721                   | 0.059932209                           | 265.9157969                               |
| 22.09426686                                  | 0.883327422                   | 0.172715797                   | 0.04039166                            | 444.2163173                               |
| 14.24191701                                  | 0.895420272                   | 0.255732769                   | 0.068136396                           | 175.0303422                               |
| 31.4067163                                   | 0.897881987                   | 0.175727343                   | 0.026250077                           | 876.2781648                               |
| 19.76832024                                  | 0.866045807                   | 0.176357294                   | 0.019982681                           | 286.7569613                               |
| 19.49739784                                  | 0.86169016                    | 0.198861016                   | 0.151240073                           | 194.3411705                               |
| 23.1436558                                   | 0.876693368                   | 0.168328613                   | 0.060771442                           | 448.5068559                               |
| 19.11476534                                  | 0.893078613                   | 0.226103206                   | 0.007882168                           | 331.8664532                               |
| 20.60643108                                  | 0.855781421                   | 0.180519966                   | 0.061088702                           | 218.5299798                               |
| 21.0139022                                   | 0.911295796                   | 0.227352331                   | 0.040522468                           | 640.679362                                |
| 13.40513111                                  | 0.872460566                   | 0.211176005                   | 0.091335585                           | 154.5896121                               |
| 17.74533166                                  | 0.913721652                   | 0.32239013                    | 0.059601653                           | 271.5915887                               |
| 35.57721628                                  | 0.852646156                   | 0.138248336                   | 0.01974122                            | 394.805744                                |
| 31.16581056                                  | 0.878103556                   | 0.155359707                   | 0.075495812                           | 538.4094348                               |
| 29.5139645                                   | 0.867673665                   | 0.162525188                   | 0.052986411                           | 495.5294547                               |
| 22.6515681                                   | 0.889971806                   | 0.226300422                   | 0.009959297                           | 256.4393485                               |
| 13.15011955                                  | 0.912027987                   | 0.238301053                   | 0.090756419                           | 638.5489523                               |
| 20.4020591                                   | 0.887996001                   | 0.188559153                   | 0.078120783                           | 432.6964579                               |
| 25.75023543                                  | 0.905812032                   | 0.218638424                   | 0.057655563                           | 658.0438856                               |
| 14.15161157                                  | 0.914148497                   | 0.291082479                   | 0.062923416                           | 463.4242052                               |
| 17.24382529                                  | 0.949613258                   | 0.356130806                   | 0.065654217                           | 2328.707348                               |
| 14.19852855                                  | 0.842894628                   | 0.205997634                   | 0.136776985                           | 117.1177432                               |
| 29.4118531                                   | 0.877832245                   | 0.194605181                   | 0.015649358                           | 355.0917                                  |
| 27.09237808                                  | 0.835100249                   | 0.142138196                   | -0.004135809                          | 282.6700545                               |
| 20.9308129                                   | 0.902012019                   | 0.208747773                   | 0.120351182                           | 496.0731543                               |
| 18.66536604                                  | 0.856149849                   | 0.168580188                   | 0.041026719                           | 316.2823454                               |
| 28.22825773                                  | 0.891208185                   | 0.187821062                   | 0.059511045                           | 413.8407219                               |
| 18.54245157                                  | 0.891426137                   | 0.210994335                   | 0.08373835                            | 442.8333757                               |
| 16.79383104                                  | 0.879753871                   | 0.199308683                   | 0.073931236                           | 286.0388495                               |
| 17.62563858                                  | 0.90831596                    | 0.275126118                   | 0.038184783                           | 366.1129513                               |
| 14.86170087                                  | 0.92326213                    | 0.28457736                    | 0.039131871                           | 288.7454732                               |
| 23.45168169                                  | 0.915460779                   | 0.254089977                   | 0.025901533                           | 571.1569069                               |
| 32.07059781                                  | 0.865665631                   | 0.139144531                   | 0.038716732                           | 432.3624669                               |
| 19.20027892                                  | 0.870387009                   | 0.181802286                   | 0.049191453                           | 256.8108284                               |
| 20.25963385                                  | 0.850878004                   | 0.185940656                   | 0.067583116                           | 157.8172417                               |
| 19.49142902                                  | 0.867646975                   | 0.191263464                   | 0.051208691                           | 281.2806656                               |
| 23.17968577                                  | 0.895408213                   | 0.202502854                   | 0.02339435                            | 290.204342                                |
| 27.23021607                                  | 0.865492538                   | 0.151456979                   | 0.039841244                           | 398.4015146                               |
| 40.58915344                                  | 0.865037539                   | 0.125164423                   | 0.02987072                            | 589.4144672                               |
| 42.79153295                                  | 0.912843436                   | 0.169335775                   | 0.022601111                           | 2198.566439                               |
| 18.76293698                                  | 0.860003851                   | 0.206422591                   | 0.186284056                           | 246.287619                                |
| 15.64843621                                  | 0.88681813                    | 0.222912389                   | 0.064614794                           | 243.6129325                               |
| 15.62624749                                  | 0.932757484                   | 0.280146162                   | 0.029147778                           | 652.385604                                |
| 17.02014837                                  | 0.869009766                   | 0.187988145                   | 0.070545319                           | 321.0408776                               |
| 21.90671114                                  | 0.856730215                   | 0.160123042                   | 0.072242571                           | 395.0104789                               |
| 12.5915615                                   | 0.864718033                   | 0.208539867                   | 0.033610454                           | 314.3201319                               |
| 36.14211588                                  | 0.825840896                   | 0.153514215                   | -0.05134068                           | 357.4432135                               |
| 26.04664054                                  | 0.916730277                   | 0.233843825                   | 0.031046132                           | 1250.281784                               |
| 37.26057957                                  | 0.878034982                   | 0.159311139                   | 0.017770041                           | 548.6195829                               |
| 27.84618441                                  | 0.890110359                   | 0.242265254                   | -0.009246197                          | 402.8238313                               |
| 20.42179466                                  | 0.90591062                    | 0.236561539                   | 0.023869873                           | 366.0453851                               |
| 16.40549814                                  | 0.920038144                   | 0.255895675                   | 0.071310034                           | 412.9538165                               |
| 47.88555186                                  | 0.854053394                   | 0.124055948                   | 0.051772369                           | 560.0151067                               |
| 22.5517292                                   | 0.900314712                   | 0.212157287                   | 0.092033101                           | 570.6776711                               |
| 23.25821003                                  | 0.828657138                   | 0.155880832                   | 0.119545771                           | 233.5969934                               |
| 12.21694601                                  | 0.8838815                     | 0.219911671                   | 0.163228292                           | 221.4304342                               |
| 28.33093688                                  | 0.895808836                   | 0.235473153                   | 0.03798451                            | 319.0991365                               |

| log.sigma.1.5.mm.3D_glcM_SumEntropy | log.sigma.1.5.mm.3D_glcM_AverageIntensity | log.sigma.1.5.mm.3D_glcM_Energy | log.sigma.1.5.mm.3D_glcM_SumSquares | log.sigma.1.5.mm.3D_glcM_ClusterProminence |
|-------------------------------------|-------------------------------------------|---------------------------------|-------------------------------------|--------------------------------------------|
| 4.969455352                         | 16.58452165                               | 0.004042153                     | 33.76012499                         | 1351.738757                                |
| 4.607787526                         | 19.432645                                 | 0.01190314                      | 19.82518093                         | 7126.821265                                |
| 4.870010133                         | 13.61999619                               | 0.005818566                     | 36.66391764                         | 18905.14732                                |
| 5.264671143                         | 24.47303507                               | 0.00247385                      | 45.11931536                         | 28188.22554                                |
| 4.728112486                         | 14.39462501                               | 0.006582317                     | 22.3229649                          | 8936.716232                                |
| 4.699688846                         | 16.0813269                                | 0.005042488                     | 21.62395133                         | 5012.039015                                |
| 4.435144323                         | 19.37397366                               | 0.009216562                     | 19.27806926                         | 5645.246302                                |
| 5.105842884                         | 18.46748639                               | 0.003101219                     | 37.10523462                         | 15159.33013                                |
| 5.004274084                         | 19.29696514                               | 0.003320428                     | 29.12769294                         | 12606.93967                                |
| 4.802574442                         | 20.28375048                               | 0.005726722                     | 24.17583002                         | 10496.5691                                 |
| 4.668734982                         | 13.86972085                               | 0.00509699                      | 19.56382031                         | 4532.972061                                |
| 4.968691739                         | 27.64584395                               | 0.00444614                      | 32.97632913                         | 17593.81006                                |
| 4.658291026                         | 13.76088                                  | 0.005137991                     | 18.64818212                         | 5614.601924                                |
| 4.650266125                         | 12.47685294                               | 0.005815008                     | 17.44810049                         | 4597.69303                                 |
| 4.798672727                         | 19.04686835                               | 0.004356981                     | 24.42955711                         | 8022.407697                                |
| 4.056171055                         | 16.69117604                               | 0.038023909                     | 12.65168624                         | 5028.513775                                |
| 4.76480277                          | 11.93096229                               | 0.004831467                     | 21.52367998                         | 6178.834378                                |
| 4.709702039                         | 15.57148493                               | 0.005828181                     | 19.88068437                         | 6047.376646                                |
| 4.934300278                         | 16.80442414                               | 0.004534019                     | 28.8443071                          | 10653.92986                                |
| 4.36785319                          | 14.37846364                               | 0.014605531                     | 12.80980934                         | 3011.053335                                |
| 4.502397368                         | 19.22407378                               | 0.010662292                     | 17.21130344                         | 5214.379165                                |
| 4.825347155                         | 19.68778463                               | 0.004313603                     | 24.24516111                         | 10458.6172                                 |
| 4.57675052                          | 15.32501426                               | 0.007949578                     | 17.53576546                         | 4449.657487                                |
| 4.961153336                         | 18.96664711                               | 0.004398875                     | 33.21238244                         | 14730.25777                                |
| 4.550898216                         | 13.04811011                               | 0.008027697                     | 19.61949024                         | 5870.796354                                |
| 4.792368832                         | 19.05732095                               | 0.005954929                     | 27.09193551                         | 11111.67293                                |
| 4.483148953                         | 22.49818762                               | 0.012355511                     | 16.4509109                          | 5675.600777                                |
| 4.673043965                         | 19.06720409                               | 0.007307297                     | 23.569373                           | 10341.44036                                |
| 5.04517043                          | 18.19169063                               | 0.003216399                     | 33.5204825                          | 13476.05214                                |
| 4.526262049                         | 16.18546098                               | 0.014311016                     | 19.03925074                         | 6670.125101                                |
| 4.598862448                         | 15.23112329                               | 0.007235895                     | 20.42869118                         | 6901.056708                                |
| 4.426800275                         | 12.55374076                               | 0.010062159                     | 12.50970205                         | 3248.823054                                |
| 5.107029897                         | 19.89470471                               | 0.003049025                     | 35.04367975                         | 16936.80226                                |
| 4.601896854                         | 16.37580119                               | 0.012929984                     | 38.97918927                         | 23374.81442                                |
| 5.014381573                         | 17.66143149                               | 0.004497739                     | 40.46707645                         | 16926.70269                                |
| 4.786644989                         | 16.57356534                               | 0.004301053                     | 22.08622457                         | 5773.277492                                |
| 4.939269354                         | 17.60667166                               | 0.005626309                     | 31.23470248                         | 14497.30679                                |
| 4.840244882                         | 27.0092741                                | 0.004469287                     | 25.40180932                         | 8354.038433                                |
| 4.675721558                         | 13.57352118                               | 0.005386515                     | 19.42415762                         | 5199.112227                                |
| 4.94834493                          | 20.30967752                               | 0.003881114                     | 29.16858687                         | 12003.33181                                |
| 4.715326725                         | 18.69659354                               | 0.007564484                     | 23.63727901                         | 7942.020003                                |
| 4.8776335                           | 16.34793685                               | 0.004254526                     | 26.04981838                         | 8313.9807                                  |
| 4.900004623                         | 18.42260795                               | 0.003525872                     | 27.27383985                         | 8610.288556                                |
| 4.991227103                         | 16.58913119                               | 0.003715063                     | 31.53216526                         | 13370.38454                                |
| 4.947910057                         | 21.3866876                                | 0.00340195                      | 27.95367789                         | 10258.30825                                |
| 4.537140717                         | 13.26792839                               | 0.007930106                     | 17.45132312                         | 4622.172925                                |
| 5.118083548                         | 30.05471                                  | 0.002975265                     | 36.10014382                         | 19413.50413                                |
| 4.81897809                          | 17.29391984                               | 0.004418899                     | 26.81912787                         | 7758.386598                                |
| 4.500022497                         | 13.81764939                               | 0.012524453                     | 27.61670077                         | 14022.89594                                |
| 4.941400297                         | 21.51112368                               | 0.004588771                     | 29.83247873                         | 12292.41709                                |
| 4.711597198                         | 18.5811396                                | 0.005644766                     | 21.38020018                         | 6724.924491                                |
| 4.883686158                         | 14.90565738                               | 0.004076391                     | 28.72989199                         | 8465.973273                                |
| 4.823203891                         | 25.6534819                                | 0.005282925                     | 24.61147208                         | 9429.240109                                |
| 4.634545096                         | 12.36962161                               | 0.00577299                      | 18.45607331                         | 4848.280238                                |
| 4.49194208                          | 16.72976736                               | 0.016062139                     | 17.89178711                         | 5939.687388                                |
| 5.242819622                         | 20.42169277                               | 0.002658511                     | 45.51946729                         | 24897.88304                                |
| 5.228664297                         | 23.633655                                 | 0.002463152                     | 42.94934749                         | 22931.2613                                 |
| 5.098697835                         | 22.61384108                               | 0.003493861                     | 35.35443004                         | 20256.87208                                |
| 4.749604541                         | 16.34916494                               | 0.006975566                     | 24.50957852                         | 9176.310634                                |
| 4.522272928                         | 25.34807488                               | 0.00749967                      | 16.43566101                         | 5210.72679                                 |
| 4.896897248                         | 21.05909507                               | 0.003875623                     | 25.86442168                         | 9821.199013                                |
| 4.96558198                          | 26.01834682                               | 0.004581461                     | 29.69673741                         | 15488.31605                                |
| 4.485455621                         | 21.67024452                               | 0.010410552                     | 14.61126646                         | 4148.790613                                |
| 4.344157912                         | 48.46109958                               | 0.020128341                     | 14.98851877                         | 11365.20466                                |
| 4.612117191                         | 10.68991666                               | 0.008180103                     | 20.47238678                         | 5969.792567                                |
| 5.01264569                          | 19.32061407                               | 0.003973815                     | 33.00736678                         | 16005.7925                                 |
| 4.997081392                         | 17.22837868                               | 0.004311136                     | 37.07895943                         | 13394.30215                                |
| 4.971491418                         | 22.43702347                               | 0.003771328                     | 27.2149018                          | 11155.94345                                |
| 4.802581791                         | 18.09722985                               | 0.004827445                     | 26.49889045                         | 7217.870616                                |
| 5.069433852                         | 20.70042354                               | 0.003489184                     | 34.14847683                         | 16017.39808                                |
| 4.809368593                         | 21.29003918                               | 0.004819343                     | 22.81647848                         | 8267.824151                                |
| 4.769966833                         | 17.19613142                               | 0.004502368                     | 22.46885441                         | 6668.586991                                |
| 4.584921992                         | 19.39032339                               | 0.00900913                      | 18.26854177                         | 6326.97658                                 |
| 4.453687534                         | 17.2528205                                | 0.01044843                      | 15.38758917                         | 4524.395281                                |
| 4.753789474                         | 24.20705126                               | 0.007220497                     | 24.13792474                         | 11090.91094                                |
| 5.206869361                         | 21.24957257                               | 0.002548807                     | 41.79506598                         | 21363.82439                                |
| 4.849574137                         | 16.31844336                               | 0.00401956                      | 26.25671477                         | 7986.32964                                 |
| 4.849340003                         | 12.52642657                               | 0.004747507                     | 27.48000262                         | 9107.591526                                |
| 4.871040776                         | 17.08004695                               | 0.003967992                     | 26.38420854                         | 7867.563907                                |
| 4.877785987                         | 17.4334479                                | 0.004561662                     | 27.02946832                         | 11077.79918                                |
| 5.023909537                         | 20.33789115                               | 0.004124207                     | 35.80465691                         | 17679.24883                                |
| 5.37425265                          | 24.88031385                               | 0.002117548                     | 52.88661296                         | 32683.57145                                |
| 5.288861449                         | 47.52683214                               | 0.002884133                     | 47.70636878                         | 35046.02354                                |
| 4.635896424                         | 15.64399093                               | 0.010762272                     | 28.28265278                         | 13317.27669                                |
| 4.700626249                         | 15.81963087                               | 0.005283611                     | 20.57505766                         | 5126.985041                                |
| 4.433942258                         | 25.83175414                               | 0.010263822                     | 16.10728953                         | 6361.152607                                |
| 4.786599997                         | 18.19419209                               | 0.004793795                     | 23.8776441                          | 6793.556315                                |
| 5.022736313                         | 20.2500115                                | 0.003128934                     | 30.89924414                         | 11474.60376                                |
| 4.393945522                         | 17.87165517                               | 0.010162782                     | 19.05853357                         | 4306.446784                                |
| 4.556722189                         | 19.44553286                               | 0.012985661                     | 41.10151466                         | 18690.2866                                 |
| 4.863137583                         | 35.71378179                               | 0.005733186                     | 27.06423356                         | 16186.57357                                |
| 5.159359603                         | 23.90340434                               | 0.003455002                     | 45.8916917                          | 29023.68576                                |
| 4.815889                            | 20.44520243                               | 0.008163228                     | 27.38968303                         | 11725.87338                                |
| 4.743242254                         | 19.42010761                               | 0.005470712                     | 21.70690476                         | 8404.753766                                |
| 4.649556721                         | 20.47207175                               | 0.007079232                     | 18.56686901                         | 5832.841676                                |
| 5.305526939                         | 24.28187417                               | 0.004678757                     | 63.96515357                         | 50365.80704                                |
| 4.871604534                         | 24.08417881                               | 0.00483985                      | 25.65688362                         | 16095.68801                                |
| 4.753683221                         | 15.22771527                               | 0.009556146                     | 36.00391775                         | 16131.53059                                |
| 4.609065705                         | 14.82526282                               | 0.006917843                     | 18.59635513                         | 6289.140613                                |
| 4.772606503                         | 18.26100717                               | 0.007109754                     | 30.0606028                          | 19350.29406                                |

| log.sigma.1.5.mm.3D_glcm_SumAverage | log.sigma.1.5.mm.3D_glcm_lmc2 | log.sigma.1.5.mm.3D_glcm_lmc1 | log.sigma.1.5.mm.3D_glcm_DifferenceAverage | log.sigma.1.5.mm.3D_glcm_Id |
|-------------------------------------|-------------------------------|-------------------------------|--------------------------------------------|-----------------------------|
| 32.25612817                         | 0.843778853                   | -0.138379869                  | 6.311179441                                | 6.257422574                 |
| 38.28094423                         | 0.746849713                   | -0.100628395                  | 4.247640631                                | 0.372553826                 |
| 26.45909011                         | 0.911330513                   | -0.201410648                  | 6.111489905                                | 0.272473123                 |
| 47.85624688                         | 0.709566948                   | -0.073585591                  | 7.05995223                                 | 0.244980987                 |
| 28.64904072                         | 0.886723864                   | -0.184800381                  | 4.565186773                                | 0.299732546                 |
| 31.82497381                         | 0.750707346                   | -0.098863899                  | 4.828643659                                | 0.293054602                 |
| 38.3244401                          | 0.865248202                   | -0.174940622                  | 4.71255255                                 | 0.307106714                 |
| 35.97819725                         | 0.776104642                   | -0.100989998                  | 6.654891067                                | 0.243194346                 |
| 37.87357293                         | 0.652584494                   | -0.062441471                  | 5.642552584                                | 0.271371354                 |
| 40.00425321                         | 0.634384962                   | -0.060784147                  | 4.924313513                                | 0.308663777                 |
| 27.72547061                         | 0.694945744                   | -0.080024507                  | 4.705399711                                | 0.294548397                 |
| 54.3515434                          | 0.784512715                   | -0.107430858                  | 5.90611675                                 | 0.277508429                 |
| 27.29499117                         | 0.575184084                   | -0.049204252                  | 4.381248692                                | 0.307846702                 |
| 24.95370589                         | 0.65420407                    | -0.073080365                  | 4.155682745                                | 0.322142947                 |
| 37.34177599                         | 0.741390519                   | -0.092803389                  | 5.501568049                                | 0.263560203                 |
| 33.0455267                          | 0.693885846                   | -0.095479267                  | 2.943729669                                | 0.471891862                 |
| 23.85337381                         | 0.749488291                   | -0.099154953                  | 4.689782018                                | 0.295660957                 |
| 30.80788784                         | 0.636229724                   | -0.064039737                  | 4.170261249                                | 0.332610385                 |
| 33.0773701                          | 0.843995444                   | -0.142628586                  | 5.396570081                                | 0.271179301                 |
| 28.69317292                         | 0.657707644                   | -0.079780499                  | 3.223105142                                | 0.414977674                 |
| 37.91313706                         | 0.552160797                   | -0.046279153                  | 4.231172516                                | 0.349484831                 |
| 38.79463109                         | 0.664006827                   | -0.068942793                  | 5.168259647                                | 0.278276874                 |
| 30.37866633                         | 0.584914776                   | -0.056510845                  | 4.015441894                                | 0.346847556                 |
| 36.99709331                         | 0.899946109                   | -0.184131245                  | 6.425060703                                | 0.248762506                 |
| 25.68626603                         | 0.717707578                   | -0.090321525                  | 4.326062601                                | 0.33590094                  |
| 37.32500986                         | 0.864368458                   | -0.158544554                  | 5.340898853                                | 0.299971282                 |
| 44.74558601                         | 0.634731895                   | -0.065899707                  | 3.83835072                                 | 0.37901709                  |
| 37.42990759                         | 0.728347523                   | -0.091560016                  | 4.848104391                                | 0.316655316                 |
| 35.54315493                         | 0.735366821                   | -0.089459918                  | 6.109796866                                | 0.262150641                 |
| 31.8458502                          | 0.711419136                   | -0.088477031                  | 4.013669284                                | 0.382750721                 |
| 29.89691059                         | 0.580957667                   | -0.050471726                  | 4.544705146                                | 0.321949985                 |
| 25.07334887                         | 0.51017522                    | -0.042717989                  | 3.245639181                                | 0.383900978                 |
| 38.88664783                         | 0.727549405                   | -0.0825998                    | 6.186813624                                | 0.265544859                 |
| 32.07658271                         | 0.986450148                   | -0.440736874                  | 6.709737333                                | 0.243140015                 |
| 34.44527667                         | 0.949922374                   | -0.25443952                   | 6.990323644                                | 0.23415607                  |
| 32.7328982                          | 0.590077616                   | -0.050839317                  | 4.718745812                                | 0.298255134                 |
| 34.31391012                         | 0.693545766                   | -0.074954946                  | 5.699404234                                | 0.297973573                 |
| 53.25736282                         | 0.580352901                   | -0.047559862                  | 5.308234143                                | 0.290816826                 |
| 27.14572979                         | 0.700727383                   | -0.08447503                   | 4.59672033                                 | 0.299244607                 |
| 39.8073988                          | 0.779901044                   | -0.105930824                  | 5.778132139                                | 0.271569456                 |
| 36.63643146                         | 0.74927998                    | -0.097766715                  | 4.938437983                                | 0.324223817                 |
| 32.21731473                         | 0.745249472                   | -0.093684016                  | 5.132357921                                | 0.286013308                 |
| 36.07854105                         | 0.665799003                   | -0.067303336                  | 5.633499552                                | 0.267794794                 |
| 32.50716717                         | 0.79369942                    | -0.111267881                  | 5.792403545                                | 0.268031816                 |
| 42.10534573                         | 0.670121034                   | -0.067378527                  | 5.72635485                                 | 0.263547284                 |
| 26.3694577                          | 0.62355773                    | -0.061967795                  | 4.090959927                                | 0.339755656                 |
| 59.17929862                         | 0.610987128                   | -0.05094196                   | 6.2954952                                  | 0.261955028                 |
| 33.84326877                         | 0.814107708                   | -0.125213358                  | 5.576640758                                | 0.26681805                  |
| 27.58881962                         | 0.959445321                   | -0.32261142                   | 5.172922184                                | 0.287648583                 |
| 42.27503308                         | 0.827535044                   | -0.161967921                  | 5.962816621                                | 0.25816468                  |
| 36.43346229                         | 0.586365881                   | -0.05066169                   | 4.842734561                                | 0.311167954                 |
| 29.451129                           | 0.772328279                   | -0.105122494                  | 5.592665657                                | 0.270337142                 |
| 50.58843332                         | 0.619891553                   | -0.057122769                  | 5.039174679                                | 0.310278197                 |
| 24.73238254                         | 0.756825429                   | -0.103866017                  | 4.469134358                                | 0.302618517                 |
| 32.90931405                         | 0.669848949                   | -0.076307242                  | 3.880265865                                | 0.393005354                 |
| 39.71010527                         | 0.856980588                   | -0.139546742                  | 7.439820042                                | 0.224774698                 |
| 46.28052639                         | 0.725193686                   | -0.080847289                  | 6.818369313                                | 0.242095257                 |
| 44.44622776                         | 0.772976739                   | -0.099735009                  | 6.403173962                                | 0.250658958                 |
| 32.01985883                         | 0.811588202                   | -0.126073363                  | 5.049853849                                | 0.309119418                 |
| 50.47909612                         | 0.719927783                   | -0.092600548                  | 4.033621475                                | 0.327103249                 |
| 41.50752506                         | 0.644657923                   | -0.061745769                  | 5.339110041                                | 0.278346716                 |
| 51.24700072                         | 0.623332513                   | -0.056247314                  | 5.428248289                                | 0.301430441                 |
| 43.01360593                         | 0.628875078                   | -0.065256852                  | 3.786167611                                | 0.369866938                 |
| 96.49311361                         | 0.728079165                   | -0.101749261                  | 3.419056125                                | 0.423179456                 |
| 21.37983333                         | 0.920043433                   | -0.231637743                  | 4.579595881                                | 0.298226498                 |
| 37.67507174                         | 0.769041434                   | -0.098982916                  | 6.0171272                                  | 0.278330946                 |
| 33.64944356                         | 0.907894207                   | -0.193708369                  | 6.78870241                                 | 0.231519595                 |
| 44.39958963                         | 0.634093024                   | -0.05919905                   | 5.170549638                                | 0.295286971                 |
| 35.51593684                         | 0.855270052                   | -0.152466422                  | 5.520942475                                | 0.261138803                 |
| 40.59795601                         | 0.72838173                    | -0.083797274                  | 5.998549183                                | 0.273142463                 |
| 41.99724124                         | 0.610668217                   | -0.055603234                  | 4.913126532                                | 0.298790319                 |
| 33.73535763                         | 0.698823858                   | -0.079404622                  | 4.915022696                                | 0.290106049                 |
| 38.23615723                         | 0.609724251                   | -0.058616768                  | 4.207951177                                | 0.354825185                 |
| 33.95421305                         | 0.563969451                   | -0.049536976                  | 3.859559487                                | 0.363587307                 |
| 47.77669061                         | 0.574493796                   | -0.047480236                  | 4.743001848                                | 0.333967186                 |
| 41.51665193                         | 0.807323337                   | -0.111778533                  | 7.122008287                                | 0.227566388                 |
| 31.9813828                          | 0.721516026                   | -0.084714108                  | 5.373085977                                | 0.272883966                 |
| 24.97456474                         | 0.8118489                     | -0.125211296                  | 5.457562417                                | 0.275128746                 |
| 33.47228406                         | 0.648938086                   | -0.064052794                  | 5.364796218                                | 0.27974143                  |
| 34.04379498                         | 0.644619332                   | -0.06228103                   | 5.460734653                                | 0.288302318                 |
| 39.84765288                         | 0.904951524                   | -0.188094909                  | 6.466173803                                | 0.241467053                 |
| 48.5074207                          | 0.817819401                   | -0.113385208                  | 8.010340311                                | 0.210737594                 |
| 93.7653062                          | 0.753112343                   | -0.0879255                    | 7.193562007                                | 0.251610461                 |
| 31.06384406                         | 0.975161899                   | -0.364206666                  | 5.075152601                                | 0.293667462                 |
| 31.13831137                         | 0.546438997                   | -0.043456227                  | 4.593810989                                | 0.310452487                 |
| 51.06974563                         | 0.555954002                   | -0.047553807                  | 3.863212944                                | 0.360302079                 |
| 35.74862518                         | 0.756728562                   | -0.100121749                  | 5.103051879                                | 0.278876652                 |
| 39.64418928                         | 0.66173765                    | -0.064741923                  | 6.042993972                                | 0.250459508                 |
| 35.42394631                         | 0.942966311                   | -0.278205069                  | 4.636855333                                | 0.298148922                 |
| 37.94391921                         | 0.991903724                   | -0.486868039                  | 7.20988663                                 | 0.238668141                 |
| 70.69639162                         | 0.66850756                    | -0.068390969                  | 5.217046142                                | 0.314780175                 |
| 46.81581487                         | 0.899478822                   | -0.176525581                  | 7.022940022                                | 0.244727488                 |
| 40.16094863                         | 0.842439102                   | -0.142260355                  | 5.369942749                                | 0.31984705                  |
| 38.24145788                         | 0.616757281                   | -0.056995088                  | 4.753905259                                | 0.320318887                 |
| 40.57928116                         | 0.530662503                   | -0.041343256                  | 4.211554249                                | 0.339481921                 |
| 47.21003571                         | 0.982244759                   | -0.350605777                  | 8.517774189                                | 0.208596871                 |
| 47.67722111                         | 0.763554094                   | -0.101760247                  | 5.070530487                                | 0.299657343                 |
| 30.29232628                         | 0.986082065                   | -0.416908134                  | 6.230690491                                | 0.246185687                 |
| 29.56013116                         | 0.851195712                   | -0.158614095                  | 4.26866117                                 | 0.31138274                  |
| 35.67542928                         | 0.862997851                   | -0.159831818                  | 5.194228527                                | 0.317461811                 |

| log.sigma.1.5.mm.3D_glcm_ClusterTendency | log.sigma.1.5.mm.3D_firstorder_InterquartileRange | log.sigma.1.5.mm.3D_firstorder_Skewness | log.sigma.1.5.mm.3D_firstorder_Uniformity |
|------------------------------------------|---------------------------------------------------|-----------------------------------------|-------------------------------------------|
| 65.52915015                              | 197.8685207                                       | 0.267015818                             | 0.051830125                               |
| 41.50485267                              | 98.79780197                                       | 0.349766853                             | 0.088234878                               |
| 68.19068149                              | 169.6250134                                       | 0.921568223                             | 0.058389433                               |
| 91.52081255                              | 205.3676376                                       | 0.20791668                              | 0.04631234                                |
| 51.79131228                              | 144.5504074                                       | -0.138775685                            | 0.070413793                               |
| 44.06860873                              | 158.809948                                        | 0.006445079                             | 0.063584626                               |
| 37.10417758                              | 102.2261086                                       | -1.155296895                            | 0.093625901                               |
| 76.07298559                              | 224.8846779                                       | -0.055566548                            | 0.049019725                               |
| 63.37618496                              | 185.9077873                                       | 0.042518667                             | 0.052924166                               |
| 50.86381542                              | 140.5749378                                       | 0.428138585                             | 0.069045358                               |
| 41.37447239                              | 164.3378754                                       | -0.124406685                            | 0.065581369                               |
| 66.06079031                              | 164.3770542                                       | 0.199620305                             | 0.057470574                               |
| 39.73444739                              | 145.3311787                                       | 0.255804045                             | 0.068890771                               |
| 40.27904116                              | 149.926363                                        | 0.120773637                             | 0.068823384                               |
| 48.81646055                              | 155.8574982                                       | -0.170543531                            | 0.061438378                               |
| 25.7456058                               | 39.95360661                                       | 1.014829346                             | 0.171672402                               |
| 49.35183409                              | 176.2165508                                       | -0.005788747                            | 0.060869779                               |
| 43.53699612                              | 138.8483467                                       | 0.388509952                             | 0.069577862                               |
| 62.77472455                              | 183.5449028                                       | -0.175088285                            | 0.057450904                               |
| 28.00757505                              | 87.89531708                                       | 0.258948497                             | 0.103162651                               |
| 34.58110566                              | 101.8539762                                       | 0.540174828                             | 0.089132441                               |
| 52.90004187                              | 158.7002735                                       | 0.426381591                             | 0.060361682                               |
| 36.91394055                              | 127.6901245                                       | 0.383982185                             | 0.080934806                               |
| 67.10038873                              | 178.065712                                        | -0.24020677                             | 0.055744054                               |
| 37.25892363                              | 122.6055927                                       | 0.755830107                             | 0.07594287                                |
| 53.37983302                              | 171.9471664                                       | 0.080694985                             | 0.058355272                               |
| 34.52872333                              | 88.72593498                                       | 0.376742026                             | 0.095696585                               |
| 47.12404358                              | 130.5709915                                       | 0.692787988                             | 0.072245335                               |
| 69.06015535                              | 201.4868164                                       | -0.132862289                            | 0.050224623                               |
| 37.52077651                              | 90.18672323                                       | 0.603167517                             | 0.096235641                               |
| 38.87751113                              | 118.4094429                                       | 0.762494563                             | 0.079122279                               |
| 29.40010715                              | 100.6470089                                       | 0.515169576                             | 0.093591906                               |
| 73.94482672                              | 191.9366302                                       | 0.116293164                             | 0.050494195                               |
| 81.64784636                              | 153.3322792                                       | -0.630687515                            | 0.074149408                               |
| 78.86311109                              | 230.8792                                          | -0.26091821                             | 0.047539556                               |
| 46.92540641                              | 159.5452938                                       | -0.07988444                             | 0.062776198                               |
| 62.48084752                              | 163.7826271                                       | 0.502894843                             | 0.063430507                               |
| 49.85205214                              | 155.9933014                                       | 0.052716786                             | 0.062496955                               |
| 42.90190738                              | 147.6790123                                       | -0.360050777                            | 0.068682276                               |
| 61.67925082                              | 190.8965073                                       | 0.119870981                             | 0.054184793                               |
| 45.53901949                              | 135.5301905                                       | 0.179102356                             | 0.069769262                               |
| 55.48066488                              | 177.6065979                                       | -0.021184034                            | 0.058263021                               |
| 56.33481602                              | 186.1687164                                       | -0.175352391                            | 0.055556709                               |
| 65.4002081                               | 186.0353546                                       | 0.019539604                             | 0.053696609                               |
| 59.13732805                              | 181.4006519                                       | -0.110637856                            | 0.05576197                                |
| 35.84824844                              | 123.872139                                        | 0.538108423                             | 0.077636028                               |
| 74.13518633                              | 185.1694279                                       | 0.017352613                             | 0.051147122                               |
| 52.64087123                              | 190.3794632                                       | 0.066096299                             | 0.056586121                               |
| 62.50179232                              | 106.6163769                                       | -0.883184791                            | 0.095121408                               |
| 65.8072062                               | 175.5578384                                       | -0.307116415                            | 0.059750859                               |
| 42.836741                                | 135.0849342                                       | 0.28727289                              | 0.068678555                               |
| 59.12942843                              | 192.9328384                                       | -0.189533233                            | 0.056416675                               |
| 50.21437861                              | 146.0613251                                       | 0.18135429                              | 0.065048379                               |
| 40.11659324                              | 146.378582                                        | 0.066881888                             | 0.06810276                                |
| 36.57506865                              | 67.61594009                                       | 0.455798602                             | 0.116836146                               |
| 93.55000355                              | 232.2883759                                       | -0.001691561                            | 0.042836194                               |
| 90.62707974                              | 233.7238998                                       | 0.04637084                              | 0.044679949                               |
| 77.97278143                              | 154.4190712                                       | -0.59629685                             | 0.057883816                               |
| 48.75891661                              | 139.1707764                                       | -0.030880775                            | 0.069206575                               |
| 35.53303964                              | 130.8631363                                       | -0.319124898                            | 0.076346274                               |
| 56.98630363                              | 176.6565323                                       | 0.119181671                             | 0.057024904                               |
| 61.44138679                              | 158.8146629                                       | 0.381018473                             | 0.061535398                               |
| 32.22218577                              | 94.83612919                                       | 0.135562335                             | 0.0962359                                 |
| 33.03641651                              | 69.75389481                                       | -1.477860642                            | 0.11547832                                |
| 46.59953927                              | 159.9332733                                       | -0.013772387                            | 0.067255622                               |
| 66.94735713                              | 157.8591995                                       | 0.219033459                             | 0.058082958                               |
| 71.90841112                              | 223.2036209                                       | -0.390050432                            | 0.051882295                               |
| 60.83735801                              | 169.381958                                        | 0.067980052                             | 0.057885731                               |
| 52.99282838                              | 184.956789                                        | -0.249714333                            | 0.05728046                                |
| 71.78926547                              | 176.5237503                                       | 0.219956334                             | 0.055535183                               |
| 50.66037673                              | 153.3157978                                       | 0.342645698                             | 0.063728575                               |
| 47.18971303                              | 163.8576508                                       | -0.007891783                            | 0.061148982                               |
| 37.99193802                              | 111.4774733                                       | 0.495950698                             | 0.084699829                               |
| 31.96619616                              | 92.41208172                                       | 0.454665527                             | 0.093864279                               |
| 48.08501172                              | 108.0842237                                       | 0.255578014                             | 0.077888466                               |
| 89.16457593                              | 224.4244289                                       | -0.228867488                            | 0.04539221                                |
| 52.76166693                              | 177.7607574                                       | 0.082673752                             | 0.057705887                               |
| 57.82636392                              | 206.2915001                                       | 0.169803158                             | 0.056404192                               |
| 53.40117323                              | 188.3467121                                       | 0.035437978                             | 0.056690628                               |
| 55.06286662                              | 173.5968342                                       | 0.362151312                             | 0.059606781                               |
| 75.12740455                              | 226.2088871                                       | -0.009876527                            | 0.047264739                               |
| 109.8159519                              | 265.1077576                                       | -0.189875498                            | 0.039400405                               |
| 97.42571096                              | 176.1456699                                       | -0.119615861                            | 0.052358714                               |
| 64.85531053                              | 121.8991737                                       | -0.410046265                            | 0.076337693                               |
| 41.85649658                              | 145.7661552                                       | 0.253696884                             | 0.069545115                               |
| 32.07524148                              | 100.1729317                                       | 0.664620701                             | 0.089827328                               |
| 49.34277898                              | 184.5114446                                       | 0.113135467                             | 0.059367173                               |
| 67.10060575                              | 204.0055885                                       | -0.343271363                            | 0.052719637                               |
| 37.94989592                              | 136.5474987                                       | -0.423560805                            | 0.071217415                               |
| 78.76645883                              | 183.3174744                                       | -1.12257421                             | 0.070839002                               |
| 56.68595971                              | 134.2933693                                       | -0.52774853                             | 0.067339045                               |
| 89.7022451                               | 212.4548378                                       | 0.393299686                             | 0.045871486                               |
| 55.29444223                              | 145.6569786                                       | 0.065874038                             | 0.068845478                               |
| 45.00412562                              | 135.6751471                                       | 0.300789515                             | 0.068167574                               |
| 39.37513145                              | 117.4192772                                       | 0.358532478                             | 0.078439115                               |
| 132.850819                               | 285.182869                                        | -0.019494599                            | 0.040291209                               |
| 57.96316309                              | 146.483551                                        | -0.772091662                            | 0.064933291                               |
| 78.78013474                              | 179.5576363                                       | -0.474701933                            | 0.063784784                               |
| 42.45228718                              | 130.2196674                                       | -0.185958467                            | 0.072743854                               |
| 59.19562205                              | 131.8449421                                       | 0.885182423                             | 0.065239256                               |



| log.sigma.1.5.mm.3D_firstorder_MeanAbsoluteDeviation | log.sigma.1.5.mm.3D_firstorder_Energy | log.sigma.1.5.mm.3D_firstorder_RobustMeanAbsoluteDeviation | log.sigma.1.5.mm.3D_firstorder_Median |
|------------------------------------------------------|---------------------------------------|------------------------------------------------------------|---------------------------------------|
| 112.8543878                                          | 14034600.89                           | 79.66529043                                                | -13.44828796                          |
| 76.71308127                                          | 23954033.28                           | 45.26173902                                                | -7.732925415                          |
| 109.0823887                                          | 8893736.827                           | 70.50970709                                                | -28.35186958                          |
| 124.5891356                                          | 67434728.98                           | 84.51720627                                                | 0.262867391                           |
| 88.32302272                                          | 4604633.084                           | 60.18167804                                                | 19.16345787                           |
| 90.42514306                                          | 7838263.244                           | 65.99704125                                                | -8.97549057                           |
| 72.30516934                                          | 3320460.249                           | 42.92160019                                                | 14.21153641                           |
| 123.5345971                                          | 21666109.91                           | 91.94369682                                                | 7.230230331                           |
| 108.3062224                                          | 37650398.78                           | 76.67911014                                                | -7.739180088                          |
| 89.98955818                                          | 44819970.72                           | 57.46493389                                                | -19.25100231                          |
| 89.40231354                                          | 9599962.126                           | 66.36994008                                                | -1.128772259                          |
| 107.2554862                                          | 30331348.87                           | 69.49194692                                                | -17.58112907                          |
| 83.85298158                                          | 22743566.86                           | 59.18308281                                                | 2.807612419                           |
| 85.10349152                                          | 12022949.48                           | 61.61891919                                                | 0.130934263                           |
| 93.34828754                                          | 13008527.22                           | 64.08180612                                                | 7.300168514                           |
| 49.36072774                                          | 45170928.02                           | 22.31360976                                                | -3.712430239                          |
| 94.94325377                                          | 9167356.68                            | 70.39416457                                                | -0.620630801                          |
| 82.9259513                                           | 26088452.53                           | 56.70947608                                                | -7.922209024                          |
| 105.1629056                                          | 9839723.134                           | 74.62131076                                                | 26.87979221                           |
| 61.58599048                                          | 20128332.36                           | 37.83784017                                                | -3.440692186                          |
| 75.99014899                                          | 57699262.86                           | 46.1663122                                                 | -16.56090069                          |
| 95.64069286                                          | 25520006.12                           | 66.01305162                                                | 0.459815025                           |
| 77.53662013                                          | 27074644.23                           | 52.38718738                                                | -17.08479309                          |
| 108.9198552                                          | 9443232.331                           | 73.65676457                                                | 21.84441185                           |
| 81.51149589                                          | 14433685.52                           | 52.97387018                                                | -28.53053474                          |
| 102.1352126                                          | 12146649.62                           | 69.19044211                                                | -16.28013039                          |
| 68.38641347                                          | 32509120                              | 40.20502934                                                | -7.82446456                           |
| 89.39362821                                          | 21248219.62                           | 55.33043996                                                | -26.618927                            |
| 114.2950822                                          | 34450498                              | 83.06651714                                                | 17.41170692                           |
| 72.97910205                                          | 28234964.42                           | 42.32177189                                                | -11.95871258                          |
| 80.28292026                                          | 37555008.55                           | 50.79930224                                                | -23.06641388                          |
| 64.99826673                                          | 43470678.15                           | 42.35770356                                                | -5.768797874                          |
| 113.1418427                                          | 41827826.65                           | 78.52765837                                                | 2.020337582                           |
| 110.5706806                                          | 2236338.247                           | 68.77836366                                                | 49.45978165                           |
| 128.9398382                                          | 8097815.089                           | 93.22594541                                                | 22.77039528                           |
| 90.67825715                                          | 24864141.17                           | 65.51935978                                                | -0.962546349                          |
| 102.450902                                           | 52969582.57                           | 66.9383768                                                 | -13.38809109                          |
| 94.78210358                                          | 49763318.25                           | 64.52361639                                                | -8.932673454                          |
| 86.19469635                                          | 9426347.735                           | 61.83732898                                                | 23.46245956                           |
| 106.9752257                                          | 18772517.01                           | 75.97463703                                                | -7.553629875                          |
| 88.86940834                                          | 20976112.34                           | 56.26359145                                                | -7.534105301                          |
| 101.0272325                                          | 14149182.44                           | 74.356579                                                  | -3.664666653                          |
| 103.8538148                                          | 25921964.21                           | 76.48245201                                                | 4.389392614                           |
| 108.854115                                           | 18929373.56                           | 76.24782275                                                | 8.817716599                           |
| 103.8309552                                          | 30944982.99                           | 74.45891939                                                | 4.426675797                           |
| 78.01728598                                          | 23196916.39                           | 51.81723742                                                | -12.13532019                          |
| 113.0812299                                          | 92307578.11                           | 75.74187649                                                | -0.91868031                           |
| 104.1190292                                          | 9316264.076                           | 76.52339345                                                | -9.465143204                          |
| 85.92434818                                          | 1836149.246                           | 49.49018214                                                | 28.62036037                           |
| 103.9842389                                          | 8507923.869                           | 72.40244137                                                | 26.63554001                           |
| 85.79649658                                          | 43355496.92                           | 56.18261362                                                | -8.283165932                          |
| 106.6180402                                          | 13314024.88                           | 80.96266007                                                | 2.928744793                           |
| 91.14143282                                          | 54553773.12                           | 60.51188393                                                | -7.021806717                          |
| 83.92884248                                          | 6507763.343                           | 59.28241901                                                | 3.811033487                           |
| 64.48276274                                          | 58863441.16                           | 34.75154937                                                | -4.281490326                          |
| 132.2757612                                          | 23440919.57                           | 94.83262858                                                | -6.118835926                          |
| 128.6985081                                          | 53775419.87                           | 94.34264831                                                | 1.323242188                           |
| 108.2960804                                          | 26041977.35                           | 69.95807994                                                | 25.90699005                           |
| 90.89518531                                          | 12316259.43                           | 57.45163857                                                | -5.261254311                          |
| 78.77292384                                          | 8959569.141                           | 55.01603256                                                | -12.2185955                           |
| 101.1100687                                          | 33636799.36                           | 71.69233895                                                | -16.48397636                          |
| 98.35619293                                          | 92996912.08                           | 64.05297946                                                | -3.980248451                          |
| 67.11614617                                          | 26630958.72                           | 41.04143581                                                | -2.904860973                          |
| 61.63113646                                          | 23613323.13                           | 34.74376561                                                | -1.663783908                          |
| 90.32273023                                          | 2686784.364                           | 64.23972696                                                | -7.397643566                          |
| 101.8288635                                          | 28341673.65                           | 65.62498374                                                | 7.970613956                           |
| 121.3461265                                          | 8384482.91                            | 89.50272141                                                | 16.20114803                           |
| 98.51377039                                          | 49352333.88                           | 69.06944614                                                | -6.565014362                          |
| 102.5080494                                          | 6976484.865                           | 75.08856814                                                | -11.82358122                          |
| 106.1556152                                          | 37778117.95                           | 71.66517643                                                | -10.996665                            |
| 92.74169558                                          | 42460046.42                           | 63.25488569                                                | -15.49412489                          |
| 93.41292679                                          | 14954939.65                           | 67.51249504                                                | -5.782476425                          |
| 75.63375397                                          | 55803897.1                            | 46.5667566                                                 | -8.17250967                           |
| 68.88655976                                          | 61469203.04                           | 41.94814227                                                | -12.24023008                          |
| 81.42590248                                          | 121449053                             | 47.88762008                                                | 1.476020753                           |
| 128.3629196                                          | 27852830.78                           | 92.28275756                                                | 3.115666747                           |
| 99.71022409                                          | 16773516.43                           | 72.22339705                                                | -9.706572533                          |
| 108.6117112                                          | 10378873.08                           | 82.09960013                                                | -29.7094059                           |
| 101.6220637                                          | 27529988.63                           | 74.23997495                                                | -20.52452183                          |
| 99.89813126                                          | 46548634.76                           | 68.94718779                                                | -16.11054325                          |
| 124.6559193                                          | 12064255.07                           | 90.1961201                                                 | -20.92284775                          |
| 147.1016758                                          | 42848583.66                           | 107.8729166                                                | 10.36084843                           |
| 117.9234505                                          | 70819035.44                           | 75.55310404                                                | 6.172631502                           |
| 91.08385002                                          | 2237754.912                           | 54.93477748                                                | 30.80579376                           |
| 85.40839168                                          | 39155331.14                           | 59.22220747                                                | -11.19570637                          |
| 68.83691749                                          | 50793033.18                           | 42.41354859                                                | -7.211806059                          |
| 99.27725984                                          | 11412353.82                           | 72.85373783                                                | -15.5481782                           |
| 113.8803744                                          | 28789815.03                           | 85.02013854                                                | 17.39769936                           |
| 83.19834568                                          | 2076561.928                           | 56.98178743                                                | 21.78529167                           |
| 120.1978769                                          | 2525667.157                           | 76.72095445                                                | 28.13780022                           |
| 90.5885397                                           | 61581241.71                           | 57.24522599                                                | -0.316879749                          |
| 130.6378368                                          | 19995257.74                           | 89.11715918                                                | -23.38002777                          |
| 94.39819365                                          | 16607486.02                           | 60.0131718                                                 | -6.662675619                          |
| 85.65893465                                          | 52744976.9                            | 56.19241435                                                | -7.520417929                          |
| 77.88715732                                          | 62318062.2                            | 50.32387016                                                | -11.71461296                          |
| 163.2265351                                          | 10065233.42                           | 118.6672105                                                | -22.80246735                          |
| 93.19407925                                          | 18856076.78                           | 61.06162433                                                | 18.88799572                           |
| 109.5690301                                          | 2292594.94                            | 75.3027401                                                 | 44.954422                             |
| 81.28610081                                          | 4236553.717                           | 55.00400419                                                | 24.15991402                           |
| 100.3773015                                          | 15602240.6                            | 60.28704382                                                | -23.75662994                          |

| log.sigma.1.5.mm.3D_firstorder_TotalEnergy | log.sigma.1.5.mm.3D_firstorder_Maximum | log.sigma.1.5.mm.3D_firstorder_RootMeanSquared | log.sigma.1.5.mm.3D_firstorder_90Percentile | log.sigma.1.5.mm.3D_firstorder_Minimum |
|--------------------------------------------|----------------------------------------|------------------------------------------------|---------------------------------------------|----------------------------------------|
| 378934224                                  | 548.6444092                            | 140.9930427                                    | 188.2714691                                 | -397.5913391                           |
| 646758898.7                                | 424.2545166                            | 107.3917887                                    | 140.6968231                                 | -456.6477966                           |
| 240130894.3                                | 540.6573486                            | 143.1519513                                    | 190.6081772                                 | -309.7500916                           |
| 1820737683                                 | 615.1563721                            | 159.9747715                                    | 215.5277435                                 | -574.9212646                           |
| 124325093.3                                | 409.6469727                            | 113.2531501                                    | 119.7939423                                 | -343.6558838                           |
| 211633107.6                                | 336.1830139                            | 110.4089897                                    | 129.2437439                                 | -385.368103                            |
| 89652426.71                                | 244.8308563                            | 99.26226761                                    | 97.7168457                                  | -472.3294983                           |
| 584984967.6                                | 445.2237244                            | 147.0471495                                    | 179.6578094                                 | -430.0306396                           |
| 1016560767                                 | 419.4113159                            | 134.5728796                                    | 161.5891083                                 | -452.4830933                           |
| 1210139209                                 | 556.6009521                            | 120.2804592                                    | 153.7997925                                 | -496.303833                            |
| 259198977.4                                | 277.385437                             | 107.7412488                                    | 125.0109116                                 | -326.6747742                           |
| 818946419.6                                | 601.9699707                            | 143.061166                                     | 187.7751373                                 | -652.1460571                           |
| 614076305.2                                | 519.1832275                            | 104.7188615                                    | 132.1713287                                 | -323.2597046                           |
| 324619636.1                                | 321.662384                             | 103.7013976                                    | 141.4243317                                 | -294.78302                             |
| 351230234.9                                | 440.7718201                            | 119.4964151                                    | 159.7644958                                 | -447.0220032                           |
| 1219615057                                 | 601.3790283                            | 80.63634923                                    | 92.7744751                                  | -397.6672058                           |
| 247518630.4                                | 346.7459412                            | 114.602569                                     | 133.8763184                                 | -378.0727539                           |
| 704388218.4                                | 384.76828                              | 105.7693625                                    | 144.1819443                                 | -250.9222107                           |
| 265672524.6                                | 362.2128296                            | 130.0259235                                    | 172.6225662                                 | -378.0758057                           |
| 543464973.8                                | 339.2271423                            | 84.77100717                                    | 114.8614426                                 | -347.8688965                           |
| 1557880097                                 | 470.6703186                            | 105.0953615                                    | 140.5778473                                 | -463.7990112                           |
| 689040165.4                                | 540.8240967                            | 121.8080985                                    | 167.9351761                                 | -469.3050537                           |
| 731015394.3                                | 351.422699                             | 99.56817094                                    | 142.9964905                                 | -364.8086548                           |
| 254967272.9                                | 440.4619751                            | 140.1160221                                    | 166.9713593                                 | -448.5886536                           |
| 389709509                                  | 606.628479                             | 109.490232                                     | 137.2392044                                 | -301.5415649                           |
| 327959539.7                                | 383.0473022                            | 132.2965494                                    | 163.703009                                  | -474.9568481                           |
| 877746239.9                                | 456.7665405                            | 96.84748063                                    | 122.6788177                                 | -534.3618774                           |
| 573701929.9                                | 521.003479                             | 121.7694034                                    | 150.7024017                                 | -469.2723389                           |
| 930163446                                  | 405.1917725                            | 139.7093259                                    | 187.1666656                                 | -420.6776428                           |
| 762344039.4                                | 506.843811                             | 105.391564                                     | 121.186792                                  | -391.6451111                           |
| 1013985231                                 | 592.1546631                            | 108.6897697                                    | 136.2743256                                 | -354.4502869                           |
| 1173708310                                 | 424.2622375                            | 85.61913994                                    | 121.6942589                                 | -291.9622803                           |
| 1129351320                                 | 577.0905762                            | 143.4379139                                    | 186.8933716                                 | -468.2554016                           |
| 60381132.68                                | 418.0873108                            | 146.6398731                                    | 154.5312241                                 | -393.7287598                           |
| 218641007.4                                | 366.6212769                            | 156.1762124                                    | 196.0467514                                 | -414.3544922                           |
| 671331811.6                                | 349.3604126                            | 110.9458462                                    | 138.8754181                                 | -391.5556335                           |
| 1430178730                                 | 551.6245117                            | 135.6179051                                    | 186.7689896                                 | -420.1958313                           |
| 1343609593                                 | 405.6445923                            | 121.8072495                                    | 165.7497772                                 | -645.2178955                           |
| 254511388.8                                | 302.7845459                            | 106.2498904                                    | 134.7276123                                 | -315.1099854                           |
| 506857959.3                                | 492.1988525                            | 133.7745532                                    | 160.7512573                                 | -476.5101318                           |
| 566355033.1                                | 402.4176941                            | 119.2926698                                    | 160.8575836                                 | -446.0144958                           |
| 382027925.9                                | 359.4451294                            | 121.8482294                                    | 143.0236053                                 | -380.6743164                           |
| 699893033.5                                | 386.5418701                            | 125.6456267                                    | 149.9751404                                 | -426.7398071                           |
| 511093086.1                                | 425.0353088                            | 135.8958481                                    | 174.1928833                                 | -399.6000366                           |
| 835514540.7                                | 457.2218933                            | 128.3652084                                    | 146.6443527                                 | -513.1040039                           |
| 626316742.5                                | 465.0146179                            | 102.0369657                                    | 136.4981873                                 | -305.8586731                           |
| 2492304609                                 | 549.8262329                            | 147.0985029                                    | 191.5226974                                 | -709.3766479                           |
| 251539130.3                                | 382.7341309                            | 126.4115096                                    | 150.9781708                                 | -408.1653748                           |
| 49576029.63                                | 352.5107117                            | 117.0581322                                    | 110.2080498                                 | -349.6468506                           |
| 229713944.5                                | 449.8097534                            | 130.8379115                                    | 149.0238373                                 | -501.4210815                           |
| 1170598417                                 | 462.9481201                            | 112.5266024                                    | 146.7369781                                 | -426.5800476                           |
| 359478671.7                                | 357.2359619                            | 126.8825585                                    | 142.0643829                                 | -353.0359497                           |
| 1472951874                                 | 551.348938                             | 119.487886                                     | 154.4788361                                 | -621.7017212                           |
| 175709610.3                                | 375.1418762                            | 104.9354273                                    | 149.4984131                                 | -294.7407837                           |
| 1589312911                                 | 523.7248535                            | 94.99464726                                    | 127.06866                                   | -376.0647278                           |
| 632904828.5                                | 454.4717712                            | 166.33025193                                   | 196.53591                                   | -475.7036438                           |
| 1451936337                                 | 544.6760864                            | 156.5930883                                    | 196.7753845                                 | -569.5432739                           |
| 703133388.4                                | 382.3879089                            | 141.9180764                                    | 168.0007507                                 | -529.8852539                           |
| 332539004.6                                | 515.1732788                            | 123.0062593                                    | 145.6363525                                 | -394.8799744                           |
| 241908366.8                                | 327.9934692                            | 100.8452875                                    | 124.5305328                                 | -609.2998657                           |
| 908193582.6                                | 433.0587463                            | 125.9916762                                    | 165.0784546                                 | -518.7775269                           |
| 2510916626                                 | 552.7911748                            | 130.2936499                                    | 169.2411804                                 | -605.0505371                           |
| 719035885.3                                | 377.6118164                            | 92.83551713                                    | 128.4571854                                 | -505.4577332                           |
| 637559724.5                                | 299.2799072                            | 92.98602976                                    | 113.0093613                                 | -1189.220947                           |
| 72543177.83                                | 261.4502563                            | 111.2721653                                    | 141.6821045                                 | -262.1440125                           |
| 765225188.6                                | 506.6498718                            | 135.0911873                                    | 195.1885132                                 | -439.8507996                           |
| 226381038.6                                | 346.7383118                            | 145.8780774                                    | 166.635202                                  | -411.0783886                           |
| 1332513015                                 | 545.5215454                            | 124.2460325                                    | 161.8040985                                 | -537.0612793                           |
| 188365091.3                                | 282.3848877                            | 125.0693517                                    | 140.9821243                                 | -448.9916687                           |
| 1020009185                                 | 622.2571411                            | 137.0610719                                    | 188.8464203                                 | -494.150238                            |
| 1146421253                                 | 387.3053284                            | 118.1825729                                    | 163.6599823                                 | -505.2660522                           |
| 403783370.6                                | 393.8359985                            | 115.0920595                                    | 134.9034271                                 | -402.8722839                           |
| 1506705222                                 | 463.9074402                            | 103.9132701                                    | 137.3378479                                 | -453.5136108                           |
| 1659668482                                 | 646.3430786                            | 95.66948751                                    | 125.6600342                                 | -421.2084045                           |
| 3279124431                                 | 583.6596069                            | 115.0206257                                    | 142.3678436                                 | -556.4119873                           |
| 752026431.2                                | 520.4624634                            | 157.9801686                                    | 183.1417236                                 | -513.8118286                           |
| 452884943.7                                | 424.5255432                            | 122.5421435                                    | 142.5107513                                 | -395.0916138                           |
| 280229573.3                                | 355.6532593                            | 130.4398177                                    | 160.197966                                  | -302.1672363                           |
| 743309692.9                                | 355.3122559                            | 124.9262563                                    | 150.1469818                                 | -413.0910034                           |
| 1256813139                                 | 631.1842041                            | 127.8898347                                    | 164.6616898                                 | -402.4212646                           |
| 325734886.9                                | 415.4595642                            | 154.7159139                                    | 169.6893555                                 | -507.8383789                           |
| 1156911759                                 | 572.4083862                            | 178.7532088                                    | 223.8690338                                 | -593.4066162                           |
| 1912113957                                 | 596.0682373                            | 159.2638818                                    | 210.5673828                                 | -1141.107056                           |
| 60419382.62                                | 304.7235413                            | 124.2287909                                    | 159.4642517                                 | -363.3070679                           |
| 1057193941                                 | 426.1616516                            | 107.4562191                                    | 150.729126                                  | -362.6901245                           |
| 1371411896                                 | 614.6654053                            | 96.30977191                                    | 116.3215294                                 | -610.2844849                           |
| 308133553.2                                | 321.4172058                            | 121.1149671                                    | 152.732515                                  | -429.8435974                           |
| 777325005.7                                | 315.6578064                            | 136.1988933                                    | 159.847934                                  | -492.254364                            |
| 56067172.05                                | 226.5784454                            | 106.5238609                                    | 156.2852539                                 | -406.5795593                           |
| 68193013.24                                | 249.2284241                            | 155.0934329                                    | 126.3094772                                 | -487.014801                            |
| 1662693526                                 | 426.4389954                            | 124.4674105                                    | 155.0526215                                 | -855.0222168                           |
| 539871959                                  | 541.9429321                            | 168.2911014                                    | 226.397049                                  | -597.4005127                           |
| 448402122.5                                | 455.4045105                            | 127.4754342                                    | 166.758168                                  | -493.2531738                           |
| 1424114376                                 | 564.592041                             | 113.5609192                                    | 139.5012772                                 | -468.4729004                           |
| 1682587679                                 | 616.1664429                            | 103.6020752                                    | 137.7362289                                 | -480.6637268                           |
| 271761302.3                                | 514.1221313                            | 199.4580941                                    | 245.8958771                                 | -596.6520386                           |
| 509114072.9                                | 450.5599365                            | 124.5256684                                    | 140.0918198                                 | -564.5618286                           |
| 61900063.39                                | 286.6264954                            | 175.316217                                     | 175.316217                                  | -356.9538269                           |
| 114386950.4                                | 380.5547485                            | 105.7272056                                    | 126.8153702                                 | -339.624939                            |
| 421260496.1                                | 538.5031128                            | 139.0454295                                    | 182.1233337                                 | -432.6759644                           |

| log.sigma.1.5.mm.3D_firstorder_Entropy | log.sigma.1.5.mm.3D_firstorder_StandardDeviation | log.sigma.1.5.mm.3D_firstorder_Range | log.sigma.1.5.mm.3D_firstorder_Variance | log.sigma.1.5.mm.3D_firstorder_10Percentile |
|----------------------------------------|--------------------------------------------------|--------------------------------------|-----------------------------------------|---------------------------------------------|
| 4.487504696                            | 140.9873621                                      | 946.2357483                          | 19877.43627                             | -177.0909042                                |
| 4.008920885                            | 107.3832632                                      | 880.9023132                          | 11531.16523                             | -134.7231262                                |
| 4.410356039                            | 143.1462009                                      | 850.4074402                          | 20490.83483                             | -159.9857056                                |
| 4.701832833                            | 159.5747031                                      | 1190.077637                          | 25464.08588                             | -187.1686005                                |
| 4.132561687                            | 113.1407399                                      | 753.3028564                          | 12800.82703                             | -145.8507666                                |
| 4.148527466                            | 109.8486981                                      | 721.5511169                          | 12066.73648                             | -154.0986053                                |
| 3.810226498                            | 99.2138461                                       | 717.1603546                          | 9843.386962                             | -131.0400787                                |
| 4.537456244                            | 147.0411934                                      | 875.254364                           | 21621.11254                             | -186.1515151                                |
| 4.454329393                            | 134.3459434                                      | 871.8944092                          | 18048.8325                              | -181.429953                                 |
| 4.231278455                            | 120.1272257                                      | 1052.904785                          | 14430.55035                             | -140.5505768                                |
| 4.108104422                            | 107.4378229                                      | 604.0602112                          | 11542.88579                             | -147.8243042                                |
| 4.476930055                            | 143.0169387                                      | 1254.116028                          | 20453.84475                             | -160.7096436                                |
| 4.084648309                            | 104.5446331                                      | 842.4429321                          | 10929.58031                             | -120.6896439                                |
| 4.068999409                            | 103.6181349                                      | 616.4454041                          | 10736.71787                             | -120.5611038                                |
| 4.259674804                            | 119.2895213                                      | 887.7938232                          | 14229.9899                              | -140.2736969                                |
| 3.307636619                            | 80.61974036                                      | 999.0462341                          | 6499.542536                             | -80.18015289                                |
| 4.196723644                            | 114.5294155                                      | 624.8186951                          | 13116.98702                             | -159.9807404                                |
| 4.099357017                            | 105.7524185                                      | 735.6904907                          | 11183.57401                             | -125.976609                                 |
| 4.357341177                            | 129.6574194                                      | 740.2886353                          | 16811.04641                             | -165.5637009                                |
| 3.713490293                            | 84.76577871                                      | 687.0960388                          | 7185.23724                              | -101.2484131                                |
| 3.974702632                            | 104.809639                                       | 934.4693298                          | 10985.06043                             | -126.6596901                                |
| 4.290458496                            | 121.5369263                                      | 1010.12915                           | 14771.22446                             | -135.7217102                                |
| 3.958995717                            | 99.50718544                                      | 716.2313538                          | 9901.679954                             | -120.8844299                                |
| 4.458111892                            | 139.881562                                       | 889.0506287                          | 19566.8514                              | -181.0908661                                |
| 4.053336805                            | 108.3422664                                      | 908.1700439                          | 11738.04669                             | -137.1575714                                |
| 4.388431829                            | 131.8940615                                      | 858.0041504                          | 17396.04347                             | -162.6726974                                |
| 3.872394974                            | 96.82992379                                      | 991.128418                           | 9376.034141                             | -113.3195801                                |
| 4.187479344                            | 121.1739496                                      | 990.2758179                          | 14683.12605                             | -143.1981628                                |
| 4.499977207                            | 139.2886079                                      | 825.8694153                          | 19401.3163                              | -164.452829                                 |
| 3.929069895                            | 104.751586                                       | 898.4889221                          | 10972.89478                             | -139.5880234                                |
| 4.046256814                            | 108.1955087                                      | 946.60495                            | 11706.26809                             | -132.0318665                                |
| 3.763129335                            | 85.48756748                                      | 716.2245178                          | 7308.124193                             | -94.24452972                                |
| 4.5464224                              | 143.3770707                                      | 1045.345978                          | 20556.9844                              | -175.0114319                                |
| 4.117514165                            | 146.1597804                                      | 811.8160706                          | 21362.68142                             | -183.6665543                                |
| 4.590696511                            | 156.0100392                                      | 780.975769                           | 24339.13232                             | -203.3966492                                |
| 4.178139256                            | 110.9144506                                      | 740.9160461                          | 12302.01534                             | -152.5815155                                |
| 4.376908808                            | 135.5915918                                      | 971.820343                           | 18385.07977                             | -164.8472443                                |
| 4.287723703                            | 121.7882336                                      | 1050.862488                          | 14832.37385                             | -138.7116196                                |
| 4.074157083                            | 105.89936                                        | 617.8945313                          | 11214.67444                             | -141.5524719                                |
| 4.426310152                            | 133.7313065                                      | 968.7089844                          | 17884.06234                             | -171.650531                                 |
| 4.224769298                            | 119.2779566                                      | 848.4321899                          | 14227.23094                             | -146.3031525                                |
| 4.29176275                             | 121.7337023                                      | 740.1194458                          | 14819.09428                             | -164.4796417                                |
| 4.343663732                            | 125.5359438                                      | 813.2816772                          | 15759.27318                             | -176.7361343                                |
| 4.454787778                            | 135.8895257                                      | 824.6353455                          | 18465.96321                             | -169.9130981                                |
| 4.382175791                            | 128.2310113                                      | 970.3258972                          | 16443.19225                             | -175.6247574                                |
| 4.004766824                            | 102.0065173                                      | 770.873291                           | 10405.32957                             | -123.4181992                                |
| 4.577509802                            | 146.9756571                                      | 1259.202881                          | 21601.84379                             | -171.7526627                                |
| 4.329393257                            | 126.2143207                                      | 790.8995056                          | 15930.05475                             | -165.1608459                                |
| 3.802285576                            | 116.9930004                                      | 702.1575623                          | 13687.36214                             | -128.1611877                                |
| 4.327713828                            | 130.7315578                                      | 951.230835                           | 17090.74021                             | -184.2717468                                |
| 4.18466088                             | 112.5241839                                      | 889.5281677                          | 12661.69195                             | -138.9259262                                |
| 4.302997587                            | 126.3656595                                      | 710.2719116                          | 15968.2799                              | -190.1137817                                |
| 4.25854721                             | 119.4841478                                      | 1173.050659                          | 14276.46157                             | -152.0708771                                |
| 4.079671548                            | 104.804256                                       | 669.8826599                          | 10983.93208                             | -115.8097687                                |
| 3.736667795                            | 94.96945339                                      | 899.7895813                          | 9019.197076                             | -110.7637573                                |
| 4.727790211                            | 163.1756291                                      | 930.175415                           | 26626.28594                             | -223.6161987                                |
| 4.667539544                            | 156.5928102                                      | 1114.21936                           | 24521.3082                              | -198.4989166                                |
| 4.447972042                            | 141.8013282                                      | 912.2731628                          | 20107.61667                             | -197.0890137                                |
| 4.241831208                            | 122.8809747                                      | 910.0532532                          | 15099.73395                             | -160.1106812                                |
| 3.974284493                            | 100.8231607                                      | 937.293335                           | 10165.30973                             | -110.5557709                                |
| 4.351592871                            | 125.8783579                                      | 951.8362732                          | 15845.36098                             | -159.585434                                 |
| 4.368558697                            | 130.2444885                                      | 1157.842285                          | 16963.62678                             | -155.3873199                                |
| 3.821869972                            | 92.58446291                                      | 883.0695496                          | 8571.882772                             | -97.81746063                                |
| 3.680143014                            | 92.96961283                                      | 1488.500854                          | 8643.348909                             | -110.2142563                                |
| 4.086542245                            | 111.2161315                                      | 523.5942688                          | 12369.0279                              | -152.8880249                                |
| 4.426515165                            | 134.3189279                                      | 946.5006714                          | 18041.5744                              | -148.042514                                 |
| 4.469372176                            | 145.6585814                                      | 757.8166504                          | 21216.42233                             | -172.4324615                                |
| 4.341916649                            | 124.2459891                                      | 1082.582825                          | 15437.0658                              | -151.8876892                                |
| 4.310327587                            | 124.4764464                                      | 731.3765564                          | 15494.38571                             | -178.8554611                                |
| 4.454684257                            | 137.0589182                                      | 1116.407379                          | 18785.14706                             | -161.783783                                 |
| 4.240710765                            | 118.1576764                                      | 892.5713806                          | 13961.23648                             | -142.7065414                                |
| 4.221570909                            | 114.8279337                                      | 796.7082825                          | 13185.45437                             | -155.7305115                                |
| 3.998027906                            | 103.9051385                                      | 917.421051                           | 10796.27782                             | -121.6358414                                |
| 3.864584136                            | 95.42609448                                      | 1067.551483                          | 9106.139507                             | -119.8072739                                |
| 4.139504808                            | 114.8783967                                      | 1140.071594                          | 13197.04603                             | -126.8962753                                |
| 4.662579835                            | 157.8219668                                      | 1034.274292                          | 24907.77321                             | -221.4959488                                |
| 4.308119537                            | 122.2659385                                      | 819.617157                           | 14948.95971                             | -161.2746826                                |
| 4.318560892                            | 129.6293784                                      | 657.8204956                          | 16803.77574                             | -175.6903687                                |
| 4.3251525                              | 124.1418319                                      | 768.4032593                          | 15411.19443                             | -172.3533813                                |
| 4.349287096                            | 127.756708                                       | 1033.605469                          | 16321.77644                             | -162.254097                                 |
| 4.608549581                            | 153.4187761                                      | 923.2979431                          | 23537.32087                             | -207.8925476                                |
| 4.847080379                            | 178.7118426                                      | 1165.815002                          | 31937.9227                              | -233.6793365                                |
| 4.635623418                            | 158.7990505                                      | 1737.175293                          | 25217.13845                             | -182.2828781                                |
| 4.077112211                            | 122.9599421                                      | 668.0306091                          | 15119.14736                             | -169.6439148                                |
| 4.112218636                            | 107.4299726                                      | 788.8517761                          | 11541.19901                             | -123.4240341                                |
| 3.87784967                             | 96.30974699                                      | 1224.94989                           | 9275.567366                             | -105.0434151                                |
| 4.269838305                            | 120.9655331                                      | 751.2608032                          | 14632.6602                              | -148.6048981                                |
| 4.422124248                            | 136.1386929                                      | 807.9121704                          | 18533.74371                             | -194.7096298                                |
| 3.994573626                            | 105.8912631                                      | 633.1580048                          | 11212.9596                              | -132.3262909                                |
| 4.225112643                            | 153.6226948                                      | 736.2432251                          | 23599.93236                             | -246.7217346                                |
| 4.27159547                             | 124.4672406                                      | 1281.461212                          | 15492.09397                             | -151.0339264                                |
| 4.708177423                            | 167.7559994                                      | 1139.343445                          | 28142.07533                             | -209.2298279                                |
| 4.289269638                            | 127.4223689                                      | 948.6576843                          | 16236.46009                             | -164.123793                                 |
| 4.191816793                            | 113.5229248                                      | 1033.064941                          | 12887.45445                             | -141.179068                                 |
| 4.034590013                            | 103.601637                                       | 1096.83017                           | 10733.29919                             | -116.140789                                 |
| 4.842830727                            | 199.0941066                                      | 1110.77417                           | 39638.46329                             | -240.5372284                                |
| 4.259087456                            | 124.3282745                                      | 1015.121765                          | 15457.51983                             | -143.0906525                                |
| 4.262294843                            | 135.9166423                                      | 643.5803223                          | 18473.33365                             | -165.9848083                                |
| 4.042297651                            | 104.772292                                       | 720.1796875                          | 10977.23318                             | -120.6728516                                |
| 4.349800599                            | 138.8302585                                      | 971.1790771                          | 19273.84068                             | -158.5162048                                |

| log.sigma.1.5.mm.3D_firstorder_Kurtosis | log.sigma.1.5.mm.3D_firstorder_Mean | log.sigma.1.5.mm.3D_glrIm_ShortRunLowGrayLevelEmphasis | log.sigma.1.5.mm.3D_glrIm_GrayLevelVariance |
|-----------------------------------------|-------------------------------------|--------------------------------------------------------|---------------------------------------------|
| 2.974423346                             | -1.265630379                        | 0.009032359                                            | 33.0656584                                  |
| 4.123061599                             | -1.353166304                        | 0.003503496                                            | 20.13457387                                 |
| 4.222416774                             | -1.283096515                        | 0.013469987                                            | 34.16431699                                 |
| 3.424049905                             | 11.30670724                         | 0.002777446                                            | 41.92170551                                 |
| 3.673156896                             | 5.04469728                          | 0.011325675                                            | 21.34389239                                 |
| 2.724718282                             | -11.10893934                        | 0.00659274                                             | 20.00942884                                 |
| 5.45446507                              | -3.100130399                        | 0.006391548                                            | 16.29949703                                 |
| 2.487127587                             | -1.323495401                        | 0.005742289                                            | 35.19669852                                 |
| 2.915736554                             | -7.812004787                        | 0.004359476                                            | 29.72274784                                 |
| 4.209620634                             | -6.069474801                        | 0.003425815                                            | 24.3146037                                  |
| 2.471694458                             | -8.080278819                        | 0.008843358                                            | 19.0325173                                  |
| 4.221092083                             | -3.557031087                        | 0.002247524                                            | 34.22221262                                 |
| 3.466971099                             | 6.038181747                         | 0.008971364                                            | 18.01650346                                 |
| 2.712320194                             | 4.154754752                         | 0.011408328                                            | 17.69323098                                 |
| 3.570659978                             | 7.028749482                         | 0.007258069                                            | 23.51198563                                 |
| 8.709640056                             | 1.636545871                         | 0.00398274                                             | 12.14480874                                 |
| 2.475089015                             | -4.094118262                        | 0.014459343                                            | 21.45358838                                 |
| 3.275878453                             | 1.893151165                         | 0.005601979                                            | 18.61750252                                 |
| 2.739492523                             | 9.782350034                         | 0.00720463                                             | 27.03937274                                 |
| 3.963960114                             | 0.941497527                         | 0.006341319                                            | 12.59491876                                 |
| 4.062430557                             | -7.744325218                        | 0.003229549                                            | 19.08498826                                 |
| 3.452798647                             | 8.123324787                         | 0.003576834                                            | 24.36179302                                 |
| 3.088816231                             | -3.484352063                        | 0.005472965                                            | 16.67442765                                 |
| 3.267949973                             | 8.102360704                         | 0.009014808                                            | 32.52571978                                 |
| 4.748545932                             | -15.81341845                        | 0.010132479                                            | 19.76738561                                 |
| 3.419399108                             | -10.31181374                        | 0.005706718                                            | 29.39013797                                 |
| 5.103278805                             | -1.844007543                        | 0.002447761                                            | 16.52843826                                 |
| 4.366713821                             | -12.02753276                        | 0.00464051                                             | 24.70612917                                 |
| 2.675786771                             | 10.83417957                         | 0.006561974                                            | 31.7889225                                  |
| 4.845102916                             | -11.59685207                        | 0.005220515                                            | 19.40674366                                 |
| 4.682647213                             | -10.35364433                        | 0.005988979                                            | 19.76326317                                 |
| 3.915774482                             | 4.744779383                         | 0.008257937                                            | 12.45174242                                 |
| 3.347891108                             | 4.17740907                          | 0.004520659                                            | 33.75913913                                 |
| 3.697979881                             | 11.85626239                         | 0.019624975                                            | 34.62457243                                 |
| 2.539990875                             | 7.202567716                         | 0.009766795                                            | 39.43401731                                 |
| 2.636426407                             | -2.639210911                        | 0.005427332                                            | 20.25328976                                 |
| 3.406843038                             | -2.671404968                        | 0.005445217                                            | 31.13016775                                 |
| 3.46337106                              | 2.15225143                          | 0.001834958                                            | 24.80829215                                 |
| 2.746137217                             | 8.623500607                         | 0.011167894                                            | 18.24486846                                 |
| 3.207999768                             | -3.401285843                        | 0.004065317                                            | 29.60302815                                 |
| 3.639923289                             | -1.873534397                        | 0.004735975                                            | 24.29503342                                 |
| 2.621755686                             | 5.28173642                          | 0.006481817                                            | 24.31160719                                 |
| 2.608627082                             | -5.248841034                        | 0.004723191                                            | 25.7359348                                  |
| 2.998744506                             | 1.31084406                          | 0.008332332                                            | 30.17139393                                 |
| 3.01820984                              | -5.868089691                        | 0.003284803                                            | 27.00040111                                 |
| 3.16106785                              | -2.492548223                        | 0.0080851                                              | 17.4679897                                  |
| 3.849486089                             | 6.010470718                         | 0.001563606                                            | 35.92669641                                 |
| 2.71179697                              | -7.057975504                        | 0.006409748                                            | 26.08056523                                 |
| 4.393626446                             | 3.904378075                         | 0.03071616                                             | 22.53740779                                 |
| 3.284197882                             | 5.274361082                         | 0.004686978                                            | 27.92842425                                 |
| 3.549790433                             | -0.737766761                        | 0.00382688                                             | 21.37917856                                 |
| 2.296216494                             | -11.44131765                        | 0.009110562                                            | 26.02094971                                 |
| 3.666355562                             | -0.945165861                        | 0.001943572                                            | 24.03285349                                 |
| 2.923682283                             | 5.245170464                         | 0.015197891                                            | 18.05258756                                 |
| 4.975159798                             | 2.187677018                         | 0.004378509                                            | 15.83150073                                 |
| 2.683633662                             | -6.436372158                        | 0.005055841                                            | 43.55254779                                 |
| 2.763269572                             | -0.295108709                        | 0.002820205                                            | 39.85701551                                 |
| 3.535964944                             | 5.755322497                         | 0.003564706                                            | 32.83028857                                 |
| 3.945089906                             | -5.550305461                        | 0.010386                                               | 25.29496462                                 |
| 5.583583157                             | -2.112411357                        | 0.003097844                                            | 16.93322375                                 |
| 2.963079007                             | -5.342424075                        | 0.003104262                                            | 26.04074596                                 |
| 3.922719151                             | 3.578886209                         | 0.001871285                                            | 28.44393166                                 |
| 4.964145986                             | 6.822790454                         | 0.002587305                                            | 14.72866125                                 |
| 19.03303413                             | -1.74723278                         | 0.00082339                                             | 15.57572783                                 |
| 2.527841709                             | -3.530845197                        | 0.024766033                                            | 20.37634933                                 |
| 3.537788398                             | 14.42409363                         | 0.004465622                                            | 29.99968104                                 |
| 2.473700244                             | -7.999446451                        | 0.009968913                                            | 34.43667708                                 |
| 3.284858965                             | -0.10390898                         | 0.002632267                                            | 25.57981783                                 |
| 2.729943351                             | -12.16375929                        | 0.006582573                                            | 25.47343341                                 |
| 3.490536298                             | 0.768347948                         | 0.003658036                                            | 31.19146728                                 |
| 3.10365223                              | -2.425706409                        | 0.002794405                                            | 23.08514923                                 |
| 2.897769586                             | -7.792803595                        | 0.005308259                                            | 21.54186948                                 |
| 4.231120377                             | -1.299956708                        | 0.003137708                                            | 18.63583777                                 |
| 4.554252894                             | -6.819921743                        | 0.004042737                                            | 15.62717678                                 |
| 5.032590797                             | 5.718243086                         | 0.002112218                                            | 22.578766                                   |
| 2.836287603                             | -7.068272135                        | 0.004577496                                            | 40.27158636                                 |
| 2.877514552                             | -8.222968904                        | 0.006425379                                            | 24.43535325                                 |
| 2.299071578                             | -14.51793029                        | 0.014951945                                            | 27.39520595                                 |
| 2.619704027                             | -13.97766392                        | 0.006067384                                            | 25.27578464                                 |
| 3.492571385                             | -5.833814196                        | 0.005073396                                            | 27.30686412                                 |
| 2.847601643                             | -19.9923275                         | 0.005453133                                            | 38.6545802                                  |
| 2.689908263                             | 3.845381729                         | 0.003451616                                            | 51.64688733                                 |
| 4.815943826                             | 12.15917739                         | 0.000841008                                            | 41.66503983                                 |
| 3.552418627                             | 17.71002935                         | 0.013342401                                            | 24.65731362                                 |
| 3.061613612                             | 2.374873041                         | 0.005953165                                            | 19.18719312                                 |
| 6.805394089                             | 0.069274488                         | 0.001738565                                            | 16.01193657                                 |
| 2.749750238                             | -6.014569494                        | 0.005121052                                            | 24.02324667                                 |
| 2.470102675                             | -4.049054127                        | 0.004032476                                            | 30.27706982                                 |
| 3.458621803                             | 11.59195138                         | 0.009292483                                            | 18.33161726                                 |
| 3.879986413                             | -21.30822763                        | 0.02612505                                             | 39.22151467                                 |
| 5.884959619                             | 0.205677899                         | 0.001130298                                            | 26.34371646                                 |
| 3.369975979                             | -13.40967905                        | 0.003717165                                            | 46.31690592                                 |
| 3.705838403                             | -3.677801839                        | 0.004354944                                            | 27.85923463                                 |
| 4.294567433                             | -2.937331628                        | 0.003817723                                            | 21.86204689                                 |
| 4.335506396                             | -0.301309997                        | 0.002891199                                            | 18.25779037                                 |
| 2.701752795                             | -12.04441845                        | 0.006962478                                            | 64.11132949                                 |
| 5.22595941                              | 7.008726986                         | 0.004459047                                            | 25.83475878                                 |
| 2.837462755                             | 12.87049355                         | 0.015580633                                            | 29.90263076                                 |
| 3.690829941                             | 14.17775792                         | 0.009651224                                            | 18.33997286                                 |
| 4.584569044                             | -7.73245068                         | 0.005197713                                            | 32.69042585                                 |

| log.sigma.1.5.mm.3D_glrIm_LowGrayLevelRunEmphasis | log.sigma.1.5.mm.3D_glrIm_GrayLevelNonUniformityNormalized | log.sigma.1.5.mm.3D_glrIm_RunVariance | log.sigma.1.5.mm.3D_glrIm_GrayLevelNonUniformity |
|---------------------------------------------------|------------------------------------------------------------|---------------------------------------|--------------------------------------------------|
| 0.009248793                                       | 0.05052686                                                 | 0.069714551                           | 33.69924215                                      |
| 0.003743067                                       | 0.077598411                                                | 0.195293912                           | 142.2374406                                      |
| 0.013823657                                       | 0.056597164                                                | 0.06545991                            | 23.25273083                                      |
| 0.002855557                                       | 0.045291152                                                | 0.063384626                           | 113.2399428                                      |
| 0.011590772                                       | 0.06922539                                                 | 0.068020557                           | 23.37289831                                      |
| 0.006817643                                       | 0.062692543                                                | 0.073360295                           | 37.77531373                                      |
| 0.006532953                                       | 0.090117208                                                | 0.082002771                           | 28.34567986                                      |
| 0.005890556                                       | 0.048491821                                                | 0.05625801                            | 46.25129122                                      |
| 0.004499402                                       | 0.052093426                                                | 0.064734468                           | 102.1878931                                      |
| 0.003571607                                       | 0.065582933                                                | 0.094414613                           | 188.4713229                                      |
| 0.009146804                                       | 0.064855854                                                | 0.072075334                           | 50.42975877                                      |
| 0.002314824                                       | 0.055304582                                                | 0.078372915                           | 76.79127722                                      |
| 0.009303158                                       | 0.067666682                                                | 0.073983541                           | 131.2986088                                      |
| 0.01191041                                        | 0.067223564                                                | 0.090702869                           | 69.84293552                                      |
| 0.007380078                                       | 0.06058539                                                 | 0.058535859                           | 52.37848009                                      |
| 0.004449388                                       | 0.143894746                                                | 0.318772898                           | 833.5503081                                      |
| 0.014952542                                       | 0.06019717                                                 | 0.071755903                           | 39.44936866                                      |
| 0.005899836                                       | 0.067616198                                                | 0.102822997                           | 145.1522234                                      |
| 0.007401395                                       | 0.056691579                                                | 0.065497741                           | 31.17287404                                      |
| 0.006813167                                       | 0.093283843                                                | 0.207758845                           | 228.8673996                                      |
| 0.003441907                                       | 0.079928038                                                | 0.15386371                            | 375.7435015                                      |
| 0.003706533                                       | 0.059382489                                                | 0.068998176                           | 96.28987892                                      |
| 0.005789856                                       | 0.076852693                                                | 0.113121834                           | 192.2076313                                      |
| 0.009133333                                       | 0.05432675                                                 | 0.058613925                           | 24.83781073                                      |
| 0.010600904                                       | 0.072198299                                                | 0.099753526                           | 80.11832682                                      |
| 0.005874364                                       | 0.055914901                                                | 0.093522667                           | 36.02911643                                      |
| 0.002615592                                       | 0.086104001                                                | 0.176403718                           | 264.9283046                                      |
| 0.004858113                                       | 0.068525429                                                | 0.097437828                           | 90.9944159                                       |
| 0.006722772                                       | 0.049711293                                                | 0.059964172                           | 83.36577544                                      |
| 0.005579254                                       | 0.083850686                                                | 0.199063226                           | 187.7257865                                      |
| 0.006291002                                       | 0.075091246                                                | 0.098541526                           | 220.7195232                                      |
| 0.008784245                                       | 0.088707326                                                | 0.137431556                           | 475.1728276                                      |
| 0.004659303                                       | 0.049561074                                                | 0.074430474                           | 94.80644496                                      |
| 0.019803077                                       | 0.072340957                                                | 0.04137575                            | 7.224948379                                      |
| 0.009935276                                       | 0.047035232                                                | 0.045531129                           | 14.96518445                                      |
| 0.00564205                                        | 0.061926398                                                | 0.073203028                           | 117.1593304                                      |
| 0.005688687                                       | 0.058591408                                                | 0.111456389                           | 155.6781236                                      |
| 0.001913291                                       | 0.06007865                                                 | 0.089742467                           | 187.5849102                                      |
| 0.011499241                                       | 0.067639526                                                | 0.070278112                           | 52.94326792                                      |
| 0.004187227                                       | 0.053144993                                                | 0.070834061                           | 52.48723281                                      |
| 0.004937169                                       | 0.064479031                                                | 0.127002751                           | 86.72547842                                      |
| 0.00671558                                        | 0.057483132                                                | 0.071322174                           | 51.40927716                                      |
| 0.004875929                                       | 0.055088303                                                | 0.065890665                           | 85.33671793                                      |
| 0.008543263                                       | 0.053003227                                                | 0.062886069                           | 51.35333711                                      |
| 0.003386886                                       | 0.0550202                                                  | 0.06195815                            | 97.74472013                                      |
| 0.008472909                                       | 0.074136376                                                | 0.100034634                           | 152.670036                                       |
| 0.001615014                                       | 0.049764204                                                | 0.068018143                           | 200.2435684                                      |
| 0.006590894                                       | 0.055847225                                                | 0.061654243                           | 30.77232949                                      |
| 0.031916683                                       | 0.092688859                                                | 0.063949358                           | 11.78447887                                      |
| 0.004787473                                       | 0.058725159                                                | 0.056197575                           | 27.64885536                                      |
| 0.00401657                                        | 0.065494558                                                | 0.106527636                           | 206.8657008                                      |
| 0.009374076                                       | 0.055831679                                                | 0.060934749                           | 43.69641185                                      |
| 0.002037742                                       | 0.061607029                                                | 0.11154783                            | 216.7034445                                      |
| 0.015592619                                       | 0.067206648                                                | 0.071330249                           | 37.36470404                                      |
| 0.004703204                                       | 0.103726625                                                | 0.179475677                           | 600.4363026                                      |
| 0.005160818                                       | 0.042474581                                                | 0.049111066                           | 35.73878265                                      |
| 0.002904466                                       | 0.044275723                                                | 0.056488777                           | 92.38132821                                      |
| 0.003646038                                       | 0.056674956                                                | 0.052656062                           | 69.86565262                                      |
| 0.010629925                                       | 0.064778484                                                | 0.095517485                           | 48.803015                                        |
| 0.003185516                                       | 0.074276679                                                | 0.085431436                           | 60.91745329                                      |
| 0.003214997                                       | 0.055987696                                                | 0.068245646                           | 111.8166462                                      |
| 0.001959544                                       | 0.058278639                                                | 0.105915463                           | 295.3568742                                      |
| 0.002748346                                       | 0.089589765                                                | 0.140481742                           | 250.2713189                                      |
| 0.000866992                                       | 0.098517613                                                | 0.249560061                           | 230.5751056                                      |
| 0.025346983                                       | 0.06610814                                                 | 0.062388089                           | 13.56941326                                      |
| 0.004618571                                       | 0.056297262                                                | 0.072659315                           | 82.09117311                                      |
| 0.010112153                                       | 0.051457516                                                | 0.044821575                           | 19.44695087                                      |
| 0.002738715                                       | 0.0567301                                                  | 0.079013653                           | 169.6785156                                      |
| 0.006716645                                       | 0.056578084                                                | 0.056446977                           | 23.98944742                                      |
| 0.003782873                                       | 0.054183388                                                | 0.071239577                           | 102.7146347                                      |
| 0.002913586                                       | 0.062093662                                                | 0.078113302                           | 176.6533003                                      |
| 0.005507028                                       | 0.060560242                                                | 0.071681259                           | 64.10771079                                      |
| 0.003344469                                       | 0.077886854                                                | 0.158647355                           | 362.5318005                                      |
| 0.004307746                                       | 0.087025811                                                | 0.143290788                           | 527.1150477                                      |
| 0.002230432                                       | 0.073216246                                                | 0.115191497                           | 614.5495844                                      |
| 0.004670179                                       | 0.044942268                                                | 0.047137653                           | 48.03459393                                      |
| 0.006635813                                       | 0.05707899                                                 | 0.064571917                           | 60.18937626                                      |
| 0.015332724                                       | 0.055361503                                                | 0.060784538                           | 31.97504854                                      |
| 0.006276261                                       | 0.055811808                                                | 0.074609829                           | 92.44551586                                      |
| 0.005274265                                       | 0.05732196                                                 | 0.08905099                            | 152.1140411                                      |
| 0.00550069                                        | 0.046749618                                                | 0.050406028                           | 22.51636934                                      |
| 0.00350237                                        | 0.039151533                                                | 0.037287179                           | 50.69313333                                      |
| 0.000859432                                       | 0.050554456                                                | 0.061608183                           | 133.7548396                                      |
| 0.013569289                                       | 0.074385019                                                | 0.060006785                           | 10.198557                                        |
| 0.006207412                                       | 0.067543831                                                | 0.088549899                           | 213.2819543                                      |
| 0.001859306                                       | 0.084058244                                                | 0.14623301                            | 413.1022717                                      |
| 0.005273298                                       | 0.058488769                                                | 0.062322118                           | 43.04543263                                      |
| 0.004142299                                       | 0.052240504                                                | 0.055251741                           | 77.07374674                                      |
| 0.009459945                                       | 0.070354308                                                | 0.060134188                           | 12.166575                                        |
| 0.026200823                                       | 0.068183205                                                | 0.040241857                           | 6.884409639                                      |
| 0.001178443                                       | 0.063468098                                                | 0.115455329                           | 231.560036                                       |
| 0.003795837                                       | 0.044841764                                                | 0.054181096                           | 30.1000151                                       |
| 0.004528067                                       | 0.06189194                                                 | 0.129398472                           | 57.6261166                                       |
| 0.003996912                                       | 0.065251583                                                | 0.110605432                           | 245.2179867                                      |
| 0.003055037                                       | 0.074435633                                                | 0.114810812                           | 395.7324152                                      |
| 0.007025921                                       | 0.039637663                                                | 0.040222636                           | 9.663428917                                      |
| 0.004553952                                       | 0.063406357                                                | 0.079409854                           | 71.91985493                                      |
| 0.015814053                                       | 0.062393224                                                | 0.039363375                           | 7.384064491                                      |
| 0.009894122                                       | 0.07157241                                                 | 0.071831591                           | 25.38242545                                      |
| 0.005415377                                       | 0.06150624                                                 | 0.102601817                           | 45.62553394                                      |

| log.sigma.1.5.mm.3D_glrIm_LongRunEmphasis | log.sigma.1.5.mm.3D_glrIm_ShortRunHighGrayLevelEmphasis | log.sigma.1.5.mm.3D_glrIm_RunLengthNonUniformity | log.sigma.1.5.mm.3D_glrIm_ShortRunEmphasis |
|-------------------------------------------|---------------------------------------------------------|--------------------------------------------------|--------------------------------------------|
| 1.190852129                               | 296.1000618                                             | 600.6938865                                      | 0.959899861                                |
| 1.48286626                                | 368.094763                                              | 1480.486542                                      | 0.917291612                                |
| 1.182840098                               | 211.2351489                                             | 371.0161738                                      | 0.960849215                                |
| 1.174569468                               | 595.7317523                                             | 2268.254576                                      | 0.962793966                                |
| 1.199904753                               | 227.1389613                                             | 300.1467606                                      | 0.954895403                                |
| 1.212913873                               | 266.4528281                                             | 531.9785235                                      | 0.952417941                                |
| 1.233623008                               | 369.8268929                                             | 276.2522444                                      | 0.949781749                                |
| 1.160336258                               | 364.1653441                                             | 867.8169784                                      | 0.964070704                                |
| 1.188239235                               | 382.1736575                                             | 1753.637245                                      | 0.95742817                                 |
| 1.257563492                               | 415.0440585                                             | 2503.850037                                      | 0.94715986                                 |
| 1.2044204                                 | 212.1400567                                             | 692.430353                                       | 0.955510812                                |
| 1.218533468                               | 750.5579834                                             | 1229.588724                                      | 0.953493792                                |
| 1.217154724                               | 198.5815047                                             | 1706.363409                                      | 0.951008498                                |
| 1.250038265                               | 171.2027748                                             | 908.3936519                                      | 0.948171858                                |
| 1.169282862                               | 362.8375316                                             | 782.0038967                                      | 0.961816205                                |
| 1.768622131                               | 256.9369855                                             | 4260.795278                                      | 0.880987791                                |
| 1.207632138                               | 165.8509353                                             | 581.2968289                                      | 0.953985085                                |
| 1.285007455                               | 248.8036624                                             | 1842.939269                                      | 0.941177408                                |
| 1.186653236                               | 300.1164971                                             | 493.2466748                                      | 0.958549521                                |
| 1.517394072                               | 207.0032425                                             | 1955.949872                                      | 0.911844424                                |
| 1.390462131                               | 364.2131191                                             | 3911.963506                                      | 0.929203829                                |
| 1.195519896                               | 402.7335993                                             | 1450.526659                                      | 0.95725025                                 |
| 1.308240793                               | 240.0922679                                             | 2127.981719                                      | 0.937728454                                |
| 1.166806473                               | 372.2396629                                             | 415.2363144                                      | 0.963054317                                |
| 1.278011708                               | 177.4240939                                             | 953.2735619                                      | 0.94186164                                 |
| 1.254501736                               | 376.5180053                                             | 562.7528303                                      | 0.94805635                                 |
| 1.447361204                               | 482.0979567                                             | 2499.615891                                      | 0.920011291                                |
| 1.265024253                               | 371.0411071                                             | 1154.455467                                      | 0.946162071                                |
| 1.170006179                               | 341.2587356                                             | 1524.125875                                      | 0.962861279                                |
| 1.493138652                               | 254.8096176                                             | 1800.337193                                      | 0.915740049                                |
| 1.269869531                               | 237.6387915                                             | 2546.710216                                      | 0.944842121                                |
| 1.36601572                                | 163.4192722                                             | 4459.739507                                      | 0.929282878                                |
| 1.204758315                               | 405.0293829                                             | 1708.460075                                      | 0.956729386                                |
| 1.127515996                               | 310.4777238                                             | 92.0993234                                       | 0.968984335                                |
| 1.135469947                               | 344.9049955                                             | 292.9023761                                      | 0.968326127                                |
| 1.214171658                               | 275.3321942                                             | 1667.97493                                       | 0.951902342                                |
| 1.288135775                               | 318.9108729                                             | 2304.83812                                       | 0.945168343                                |
| 1.244313418                               | 699.5699144                                             | 2737.112896                                      | 0.949628012                                |
| 1.210191267                               | 198.9766206                                             | 690.430519                                       | 0.951810285                                |
| 1.199573817                               | 426.8223763                                             | 881.5471537                                      | 0.956629634                                |
| 1.329897809                               | 343.1490486                                             | 1145.871355                                      | 0.938068097                                |
| 1.207464996                               | 278.8049787                                             | 791.6801628                                      | 0.95352816                                 |
| 1.190529719                               | 344.2303289                                             | 1386.111455                                      | 0.957443499                                |
| 1.18303611                                | 293.1575805                                             | 869.6497101                                      | 0.958704244                                |
| 1.179928813                               | 459.90059                                               | 1595.635903                                      | 0.959187399                                |
| 1.272996647                               | 188.6301803                                             | 1783.56696                                       | 0.944518466                                |
| 1.192416191                               | 884.9645253                                             | 3602.734599                                      | 0.957897571                                |
| 1.181842589                               | 310.9462394                                             | 494.1699                                         | 0.95842178                                 |
| 1.178992032                               | 229.8218746                                             | 115.1644742                                      | 0.961647038                                |
| 1.171786879                               | 477.27764                                               | 422.8120119                                      | 0.958989453                                |
| 1.283018271                               | 345.2031986                                             | 2728.921008                                      | 0.943811578                                |
| 1.178314504                               | 242.8842144                                             | 703.914665                                       | 0.959475658                                |
| 1.292815316                               | 637.160579                                              | 3034.851321                                      | 0.943184896                                |
| 1.202272931                               | 173.5501355                                             | 495.4787601                                      | 0.955956582                                |
| 1.455535949                               | 270.2965652                                             | 4702.342532                                      | 0.919391404                                |
| 1.141029464                               | 440.3112867                                             | 774.3403312                                      | 0.96826579                                 |
| 1.162316427                               | 574.8305449                                             | 1897.574246                                      | 0.963614871                                |
| 1.153425065                               | 528.8823795                                             | 1123.940072                                      | 0.964827173                                |
| 1.264388181                               | 276.3277673                                             | 652.3894321                                      | 0.944877936                                |
| 1.241543237                               | 633.3065742                                             | 716.9939463                                      | 0.948377522                                |
| 1.194358825                               | 461.4067459                                             | 1784.771799                                      | 0.957167729                                |
| 1.275984976                               | 652.4003895                                             | 4410.72108                                       | 0.946525749                                |
| 1.370402637                               | 458.9764373                                             | 2331.329106                                      | 0.929730878                                |
| 1.616250117                               | 2123.118784                                             | 1800.841689                                      | 0.898489973                                |
| 1.182040331                               | 144.5102338                                             | 184.6124484                                      | 0.959173727                                |
| 1.208842995                               | 377.8030787                                             | 1293.657038                                      | 0.954059796                                |
| 1.132136922                               | 319.7127464                                             | 348.5646291                                      | 0.969248997                                |
| 1.222108697                               | 508.2574199                                             | 2639.073982                                      | 0.952198514                                |
| 1.163378449                               | 338.1783097                                             | 385.0403219                                      | 0.96319802                                 |
| 1.19757383                                | 436.8067224                                             | 1698.771836                                      | 0.957970404                                |
| 1.221309839                               | 461.4084399                                             | 2511.834265                                      | 0.952201465                                |
| 1.209783738                               | 303.5873851                                             | 935.4571689                                      | 0.952805887                                |
| 1.396380963                               | 373.0734593                                             | 3881.550683                                      | 0.929629875                                |
| 1.374498177                               | 292.877156                                              | 5035.450476                                      | 0.928992345                                |
| 1.312351436                               | 551.0231293                                             | 7123.993973                                      | 0.937174417                                |
| 1.137977208                               | 473.8622759                                             | 983.0970831                                      | 0.968163806                                |
| 1.187154613                               | 275.301352                                              | 943.8716721                                      | 0.957829797                                |
| 1.177018528                               | 188.108586                                              | 520.2089488                                      | 0.960064102                                |
| 1.209891248                               | 300.9124991                                             | 1472.358042                                      | 0.954817233                                |
| 1.240382718                               | 312.4675965                                             | 2337.213083                                      | 0.951203118                                |
| 1.146470089                               | 454.084188                                              | 441.5613949                                      | 0.966707884                                |
| 1.110161021                               | 640.3144295                                             | 1208.919022                                      | 0.974018874                                |
| 1.176050184                               | 2165.078336                                             | 2388.127263                                      | 0.96092828                                 |
| 1.181245835                               | 277.8266846                                             | 122.988767                                       | 0.957841115                                |
| 1.243000535                               | 251.5174565                                             | 2768.859088                                      | 0.949524791                                |
| 1.389336382                               | 620.3467613                                             | 4046.143753                                      | 0.925240536                                |
| 1.180659374                               | 345.0695907                                             | 661.3527834                                      | 0.95925829                                 |
| 1.162372944                               | 427.722194                                              | 1337.043238                                      | 0.962599235                                |
| 1.185170667                               | 328.8633419                                             | 155.1840369                                      | 0.956805975                                |
| 1.124000855                               | 407.0253887                                             | 93.32313677                                      | 0.969854487                                |
| 1.303903294                               | 1212.417854                                             | 3128.437161                                      | 0.940862033                                |
| 1.161285546                               | 601.55836                                               | 608.292836                                       | 0.962458578                                |
| 1.336313022                               | 417.0073223                                             | 787.8712253                                      | 0.935852061                                |
| 1.296353949                               | 376.5752306                                             | 3225.684                                         | 0.941244861                                |
| 1.308433672                               | 415.5100945                                             | 4531.518231                                      | 0.938704948                                |
| 1.117859649                               | 625.7799431                                             | 226.9012689                                      | 0.972649965                                |
| 1.229177984                               | 559.6264916                                             | 992.7366262                                      | 0.949270796                                |
| 1.121277853                               | 280.7171841                                             | 109.509544                                       | 0.97041105                                 |
| 1.215282902                               | 233.011304                                              | 311.6588482                                      | 0.950552799                                |
| 1.287399348                               | 346.1208503                                             | 634.4117233                                      | 0.94009399                                 |

| log.sigma.1.5.mm.3D_glrIm_LongRunHighGrayLevelEmphasis | log.sigma.1.5.mm.3D_glrIm_RunPercentage | log.sigma.1.5.mm.3D_glrIm_LongRunLowGrayLevelEmphasis | log.sigma.1.5.mm.3D_glrIm_RunEntropy |
|--------------------------------------------------------|-----------------------------------------|-------------------------------------------------------|--------------------------------------|
| 354.0940315                                            | 0.944650251                             | 0.010257359                                           | 4.778423468                          |
| 578.7023622                                            | 0.882078442                             | 0.00512238                                            | 4.631898052                          |
| 245.8909204                                            | 0.946472882                             | 0.015468352                                           | 4.693349416                          |
| 715.747203                                             | 0.948824989                             | 0.003219483                                           | 5.001127441                          |
| 283.9281185                                            | 0.940432826                             | 0.012747926                                           | 4.441832135                          |
| 333.9990748                                            | 0.937073813                             | 0.007832646                                           | 4.483131054                          |
| 484.1907903                                            | 0.932892034                             | 0.007176279                                           | 4.159605108                          |
| 430.8770299                                            | 0.9518655                               | 0.006546282                                           | 4.808752902                          |
| 469.4285587                                            | 0.943537944                             | 0.005115345                                           | 4.77898426                           |
| 537.8677956                                            | 0.927521478                             | 0.004279046                                           | 4.648577849                          |
| 262.2582025                                            | 0.94019161                              | 0.010559576                                           | 4.432800469                          |
| 945.9619042                                            | 0.936831724                             | 0.002630802                                           | 4.837659676                          |
| 248.6377399                                            | 0.935575996                             | 0.010784797                                           | 4.452064548                          |
| 218.2747317                                            | 0.929338104                             | 0.014282368                                           | 4.447792955                          |
| 438.1012079                                            | 0.948999409                             | 0.00792409                                            | 4.549966069                          |
| 492.8492042                                            | 0.832534243                             | 0.007442004                                           | 4.204388287                          |
| 206.5568292                                            | 0.938836235                             | 0.017187222                                           | 4.522714071                          |
| 329.9833938                                            | 0.920471038                             | 0.007348501                                           | 4.532066246                          |
| 367.5953071                                            | 0.944752842                             | 0.008283251                                           | 4.639604008                          |
| 332.1522387                                            | 0.875429105                             | 0.00955511                                            | 4.358950166                          |
| 527.8886202                                            | 0.899649546                             | 0.004599069                                           | 4.532567134                          |
| 493.3767525                                            | 0.942710197                             | 0.004299527                                           | 4.617886271                          |
| 323.4829993                                            | 0.915612765                             | 0.007349336                                           | 4.425712598                          |
| 449.838936                                             | 0.950423797                             | 0.009672004                                           | 4.731788657                          |
| 230.0174115                                            | 0.921607462                             | 0.012784114                                           | 4.480725402                          |
| 485.6948254                                            | 0.928397251                             | 0.006689618                                           | 4.766834664                          |
| 742.8410965                                            | 0.887456168                             | 0.003549832                                           | 4.481977726                          |
| 479.9562302                                            | 0.926297708                             | 0.00588164                                            | 4.598286925                          |
| 410.7885075                                            | 0.950141643                             | 0.007461762                                           | 4.784202814                          |
| 404.3459187                                            | 0.880136779                             | 0.007633798                                           | 4.572472391                          |
| 306.4491137                                            | 0.924480364                             | 0.007757261                                           | 4.477847925                          |
| 231.1323471                                            | 0.903074329                             | 0.011500814                                           | 4.292938687                          |
| 500.7575197                                            | 0.940898256                             | 0.005309599                                           | 4.883176414                          |
| 366.5456023                                            | 0.960059172                             | 0.020523315                                           | 4.286141125                          |
| 398.3888828                                            | 0.958294717                             | 0.010651382                                           | 4.79501536                           |
| 348.4997932                                            | 0.936557502                             | 0.006596877                                           | 4.535579792                          |
| 419.563426                                             | 0.922382479                             | 0.006925354                                           | 4.811990396                          |
| 900.4915868                                            | 0.930851796                             | 0.002293377                                           | 4.681450674                          |
| 252.9953457                                            | 0.937356057                             | 0.012946433                                           | 4.414071516                          |
| 528.0706628                                            | 0.941482731                             | 0.004745801                                           | 4.752690055                          |
| 476.4331736                                            | 0.912326479                             | 0.005995568                                           | 4.696402626                          |
| 345.4739546                                            | 0.938413108                             | 0.007744558                                           | 4.627475233                          |
| 428.2755628                                            | 0.943408601                             | 0.005557496                                           | 4.662796624                          |
| 358.0366762                                            | 0.94521576                              | 0.009475248                                           | 4.75863037                           |
| 564.7555325                                            | 0.945932662                             | 0.003834041                                           | 4.695901638                          |
| 245.0021494                                            | 0.924112692                             | 0.010361323                                           | 4.43057486                           |
| 1090.957201                                            | 0.94320026                              | 0.00185006                                            | 4.915555904                          |
| 376.7576046                                            | 0.945111492                             | 0.007378897                                           | 4.626417512                          |
| 279.3270053                                            | 0.948335247                             | 0.036814318                                           | 4.041152489                          |
| 582.8770135                                            | 0.947221792                             | 0.005203216                                           | 4.61412345                           |
| 458.4609062                                            | 0.922380482                             | 0.004960148                                           | 4.618780198                          |
| 295.2653477                                            | 0.946330574                             | 0.010544031                                           | 4.594373656                          |
| 862.4227508                                            | 0.92050007                              | 0.00252039                                            | 4.70010786                           |
| 212.213299                                             | 0.940648184                             | 0.017389877                                           | 4.396776131                          |
| 414.5048852                                            | 0.886578851                             | 0.006525233                                           | 4.365488467                          |
| 512.7597692                                            | 0.957206616                             | 0.005623066                                           | 4.968140218                          |
| 681.013787                                             | 0.95141885                              | 0.003282298                                           | 4.948756675                          |
| 634.0155053                                            | 0.95335832                              | 0.00399225                                            | 4.721178952                          |
| 361.6054274                                            | 0.925344925                             | 0.011779209                                           | 4.65190028                           |
| 814.164583                                             | 0.930760499                             | 0.003597337                                           | 4.350486184                          |
| 566.3680002                                            | 0.942498276                             | 0.003719053                                           | 4.683489258                          |
| 866.5289926                                            | 0.924972618                             | 0.002414114                                           | 4.794390778                          |
| 660.4513095                                            | 0.903286034                             | 0.003595167                                           | 4.353022081                          |
| 3803.189453                                            | 0.856462834                             | 0.00113194                                            | 4.425476816                          |
| 174.0281183                                            | 0.945763914                             | 0.027879988                                           | 4.348543393                          |
| 470.6502145                                            | 0.938729011                             | 0.005308664                                           | 4.775794714                          |
| 371.822287                                             | 0.959195627                             | 0.010732164                                           | 4.682263905                          |
| 644.965168                                             | 0.935540531                             | 0.003230575                                           | 4.708573552                          |
| 405.126521                                             | 0.950672646                             | 0.007307955                                           | 4.571547536                          |
| 535.8112895                                            | 0.942585013                             | 0.004361144                                           | 4.784641189                          |
| 581.1382104                                            | 0.935804656                             | 0.003465919                                           | 4.611128851                          |
| 380.3535663                                            | 0.937657559                             | 0.006393678                                           | 4.564568201                          |
| 544.6045031                                            | 0.900020838                             | 0.004493777                                           | 4.542730642                          |
| 422.9756885                                            | 0.901704311                             | 0.005691191                                           | 4.410612899                          |
| 761.261881                                             | 0.914236635                             | 0.002816118                                           | 4.631821462                          |
| 556.7142792                                            | 0.957678522                             | 0.005064643                                           | 4.905928051                          |
| 335.8256365                                            | 0.94401212                              | 0.007566861                                           | 4.620140038                          |
| 223.7957759                                            | 0.946784363                             | 0.017011963                                           | 4.605097061                          |
| 372.6833522                                            | 0.938993546                             | 0.007240443                                           | 4.665604335                          |
| 397.0582928                                            | 0.932320666                             | 0.006248517                                           | 4.734441891                          |
| 530.7852895                                            | 0.955586081                             | 0.005986173                                           | 4.845715068                          |
| 731.4247021                                            | 0.965525153                             | 0.00371716                                            | 5.053351336                          |
| 2636.653448                                            | 0.947514878                             | 0.000942403                                           | 4.95213395                           |
| 335.7986177                                            | 0.94535809                              | 0.014553331                                           | 4.323529637                          |
| 321.0724605                                            | 0.931152599                             | 0.007440526                                           | 4.50363094                           |
| 917.0788581                                            | 0.897342249                             | 0.002487108                                           | 4.438656217                          |
| 416.8204033                                            | 0.945916551                             | 0.005947824                                           | 4.569514612                          |
| 514.2499204                                            | 0.950584853                             | 0.004623534                                           | 4.707511724                          |
| 401.8730961                                            | 0.944934847                             | 0.010164841                                           | 4.240907935                          |
| 479.623577                                             | 0.961172161                             | 0.026510981                                           | 4.39825924                           |
| 1670.505554                                            | 0.917735849                             | 0.001426433                                           | 4.732331733                          |
| 711.9885997                                            | 0.950751798                             | 0.004134609                                           | 4.979765781                          |
| 579.7249712                                            | 0.910733103                             | 0.005419969                                           | 4.765942866                          |
| 508.515177                                             | 0.918769983                             | 0.004890515                                           | 4.644249244                          |
| 563.8879221                                            | 0.915604547                             | 0.003876963                                           | 4.509961188                          |
| 708.729528                                             | 0.963514746                             | 0.007299009                                           | 5.020098459                          |
| 725.9900456                                            | 0.932755567                             | 0.004982697                                           | 4.635430725                          |
| 319.5961989                                            | 0.961851157                             | 0.016864616                                           | 4.430915767                          |
| 297.5694908                                            | 0.935660645                             | 0.010949354                                           | 4.376275707                          |
| 456.7257141                                            | 0.919073492                             | 0.006442682                                           | 4.786637112                          |

| log.sigma.1.5.mm.3D_glrIm_HighGrayLevelRunEmphasis | log.sigma.1.5.mm.3D_glrIm_RunLengthNonUniformityNormalized | log.sigma.1.5.mm.3D_glszm_GrayLevelVariance |
|----------------------------------------------------|------------------------------------------------------------|---------------------------------------------|
| 306.2021959                                        | 0.900441282                                                | 43.36319091                                 |
| 399.0415154                                        | 0.807312521                                                | 36.01756474                                 |
| 217.4776036                                        | 0.902755996                                                | 44.09033358                                 |
| 616.9693273                                        | 0.907062323                                                | 54.15482293                                 |
| 237.5220881                                        | 0.888460281                                                | 32.22530408                                 |
| 278.9176354                                        | 0.882518596                                                | 27.87329432                                 |
| 389.8893093                                        | 0.87753425                                                 | 26.1331194                                  |
| 376.4432054                                        | 0.909690894                                                | 43.409087                                   |
| 398.2930699                                        | 0.893854265                                                | 40.74767152                                 |
| 436.0628598                                        | 0.871033958                                                | 39.60599867                                 |
| 221.1947559                                        | 0.890031053                                                | 24.55354464                                 |
| 784.9091883                                        | 0.885295741                                                | 54.66622078                                 |
| 207.8977989                                        | 0.879066456                                                | 26.19392466                                 |
| 179.4094905                                        | 0.873637316                                                | 24.45981721                                 |
| 376.8138261                                        | 0.904352277                                                | 32.63751111                                 |
| 288.7399331                                        | 0.735218996                                                | 30.22924991                                 |
| 173.303701                                         | 0.886447178                                                | 29.40229939                                 |
| 262.8375747                                        | 0.857769327                                                | 28.85521012                                 |
| 312.4423638                                        | 0.896703392                                                | 32.37641582                                 |
| 225.3472334                                        | 0.796291382                                                | 23.99642134                                 |
| 389.3552374                                        | 0.832003935                                                | 34.09909541                                 |
| 419.0583067                                        | 0.894020219                                                | 33.11562891                                 |
| 254.2083375                                        | 0.850143588                                                | 25.54948387                                 |
| 386.3871328                                        | 0.907748743                                                | 45.15788083                                 |
| 186.4731456                                        | 0.858777815                                                | 31.60919224                                 |
| 395.2032635                                        | 0.873130811                                                | 45.25748034                                 |
| 521.7725778                                        | 0.812285866                                                | 31.85070929                                 |
| 389.4775373                                        | 0.868971846                                                | 38.09729658                                 |
| 353.6736385                                        | 0.907794114                                                | 39.69089623                                 |
| 276.6463534                                        | 0.803906934                                                | 37.20899873                                 |
| 249.3638878                                        | 0.866002495                                                | 31.98639106                                 |
| 174.5209924                                        | 0.831933475                                                | 21.52174403                                 |
| 421.8586141                                        | 0.892828372                                                | 47.2562105                                  |
| 321.3867152                                        | 0.921722142                                                | 42.88954582                                 |
| 355.1498969                                        | 0.920115528                                                | 47.94885009                                 |
| 288.8049955                                        | 0.881258546                                                | 28.0029638                                  |
| 335.1458237                                        | 0.867156079                                                | 46.37601193                                 |
| 734.1334811                                        | 0.876487735                                                | 36.99497587                                 |
| 209.0475155                                        | 0.881292621                                                | 23.32580912                                 |
| 444.9608846                                        | 0.892357968                                                | 41.97318368                                 |
| 364.3279964                                        | 0.851561388                                                | 40.47652202                                 |
| 290.9359704                                        | 0.884968322                                                | 32.75359521                                 |
| 359.5608478                                        | 0.894312742                                                | 32.39316195                                 |
| 305.133799                                         | 0.897184321                                                | 39.70320193                                 |
| 479.2938422                                        | 0.89801153                                                 | 35.60767033                                 |
| 198.2232806                                        | 0.865435264                                                | 28.16986021                                 |
| 922.1118001                                        | 0.895228652                                                | 50.95724458                                 |
| 323.2133877                                        | 0.89649617                                                 | 32.97264451                                 |
| 238.3484137                                        | 0.905015836                                                | 26.82067276                                 |
| 497.5106953                                        | 0.89758549                                                 | 37.37970274                                 |
| 364.040565                                         | 0.863621996                                                | 32.63844179                                 |
| 252.6949186                                        | 0.899043147                                                | 31.6351647                                  |
| 673.851712                                         | 0.862444623                                                | 35.96627178                                 |
| 180.525194                                         | 0.890920267                                                | 24.60330579                                 |
| 292.1171548                                        | 0.811825216                                                | 30.82410965                                 |
| 453.6601687                                        | 0.920051852                                                | 53.80381365                                 |
| 594.3971484                                        | 0.908937625                                                | 49.13261809                                 |
| 548.2704662                                        | 0.911496562                                                | 42.44579204                                 |
| 291.1129363                                        | 0.865710691                                                | 41.53380036                                 |
| 665.2994008                                        | 0.873682348                                                | 26.99994015                                 |
| 480.5027472                                        | 0.893481557                                                | 36.45805849                                 |
| 687.3796904                                        | 0.86999388                                                 | 43.2866116                                  |
| 491.2399028                                        | 0.833676233                                                | 25.90183015                                 |
| 2361.254628                                        | 0.769019878                                                | 32.86834467                                 |
| 149.990798                                         | 0.898766057                                                | 26.10786757                                 |
| 394.6265473                                        | 0.886713849                                                | 43.64318027                                 |
| 329.54215                                          | 0.922102896                                                | 41.80131557                                 |
| 532.5056924                                        | 0.882116713                                                | 36.37573275                                 |
| 350.4564984                                        | 0.907867185                                                | 34.19886052                                 |
| 454.215302                                         | 0.895832112                                                | 44.14988397                                 |
| 482.8034927                                        | 0.882376072                                                | 33.72355118                                 |
| 317.7757789                                        | 0.883328091                                                | 28.83223787                                 |
| 398.9483388                                        | 0.833438288                                                | 33.25848138                                 |
| 313.6574557                                        | 0.831079786                                                | 28.36187315                                 |
| 586.3126981                                        | 0.84854705                                                 | 40.9250888                                  |
| 489.3253117                                        | 0.919568782                                                | 48.7397227                                  |
| 286.4730601                                        | 0.89490415                                                 | 32.87519653                                 |
| 194.6384917                                        | 0.90040417                                                 | 34.62234067                                 |
| 313.6869019                                        | 0.888413913                                                | 34.05393982                                 |
| 326.7909848                                        | 0.880471215                                                | 40.47463474                                 |
| 468.2514978                                        | 0.91635064                                                 | 50.61667438                                 |
| 657.7496181                                        | 0.93359108                                                 | 60.25168965                                 |
| 2250.852402                                        | 0.902440821                                                | 58.25368298                                 |
| 288.8259867                                        | 0.895993807                                                | 34.984375                                   |
| 263.6635501                                        | 0.876417037                                                | 27.78842225                                 |
| 668.2826575                                        | 0.823006238                                                | 31.70995339                                 |
| 358.3164618                                        | 0.898339374                                                | 30.78081208                                 |
| 444.0945678                                        | 0.906062278                                                | 36.93714596                                 |
| 342.5839249                                        | 0.894847219                                                | 21.63279773                                 |
| 421.2140862                                        | 0.923947054                                                | 49.35353085                                 |
| 1287.387555                                        | 0.857156661                                                | 43.62225765                                 |
| 622.4851796                                        | 0.90583272                                                 | 62.76759679                                 |
| 443.1152164                                        | 0.846055847                                                | 43.02228261                                 |
| 398.5039434                                        | 0.857967024                                                | 34.97557741                                 |
| 440.2250761                                        | 0.852130841                                                | 30.90038982                                 |
| 641.4557735                                        | 0.930541711                                                | 76.78821503                                 |
| 589.9402253                                        | 0.875078842                                                | 41.09605587                                 |
| 288.4783768                                        | 0.925049443                                                | 32.3675554                                  |
| 245.117749                                         | 0.878260023                                                | 30.22222222                                 |
| 365.180904                                         | 0.855006064                                                | 54.05898792                                 |



| log.sigma.1.5.mm.3D_glszm_SmallAreaHighGrayLevelEmphasis | log.sigma.1.5.mm.3D_glszm_GrayLevelNonUniformityNormalized | log.sigma.1.5.mm.3D_glszm_SizeZoneNonUniformityNormalized |
|----------------------------------------------------------|------------------------------------------------------------|-----------------------------------------------------------|
| 270.683004                                               | 0.044474267                                                | 0.508504728                                               |
| 309.038123                                               | 0.047306015                                                | 0.427765674                                               |
| 207.1742147                                              | 0.044233423                                                | 0.495049103                                               |
| 469.4727617                                              | 0.038514282                                                | 0.477055053                                               |
| 171.5299238                                              | 0.054076266                                                | 0.402449047                                               |
| 205.2521587                                              | 0.055428847                                                | 0.421991685                                               |
| 251.5071102                                              | 0.066093887                                                | 0.4133844                                                 |
| 289.2553847                                              | 0.042494024                                                | 0.456810761                                               |
| 283.543713                                               | 0.043409612                                                | 0.416154211                                               |
| 352.2212542                                              | 0.04648493                                                 | 0.478742865                                               |
| 163.3338255                                              | 0.057055763                                                | 0.392623448                                               |
| 612.8359665                                              | 0.039732101                                                | 0.490992313                                               |
| 155.1073397                                              | 0.05489053                                                 | 0.414290562                                               |
| 135.375882                                               | 0.058004384                                                | 0.415823765                                               |
| 275.6563576                                              | 0.05091358                                                 | 0.442024691                                               |
| 247.9728479                                              | 0.055335983                                                | 0.442956677                                               |
| 126.9145983                                              | 0.051986628                                                | 0.386970145                                               |
| 191.5169122                                              | 0.051430403                                                | 0.375463419                                               |
| 199.7425243                                              | 0.051760204                                                | 0.415714286                                               |
| 167.6536932                                              | 0.059638961                                                | 0.394945447                                               |
| 329.2484249                                              | 0.048091449                                                | 0.473270073                                               |
| 310.8447311                                              | 0.049139561                                                | 0.401406826                                               |
| 205.2754518                                              | 0.055039621                                                | 0.434311019                                               |
| 306.7323905                                              | 0.042644706                                                | 0.567769117                                               |
| 169.6336652                                              | 0.052622715                                                | 0.485597784                                               |
| 315.4515939                                              | 0.044820528                                                | 0.471907473                                               |
| 404.8906241                                              | 0.050730382                                                | 0.447715605                                               |
| 339.4660935                                              | 0.045864234                                                | 0.513649283                                               |
| 255.2645126                                              | 0.044202357                                                | 0.433754104                                               |
| 228.5291571                                              | 0.046655629                                                | 0.466169383                                               |
| 226.7765332                                              | 0.050744377                                                | 0.488995854                                               |
| 128.9521231                                              | 0.060512684                                                | 0.365874086                                               |
| 324.467437                                               | 0.04109697                                                 | 0.444650391                                               |
| 216.3343454                                              | 0.057242677                                                | 0.473797366                                               |
| 293.3038254                                              | 0.043831035                                                | 0.531975549                                               |
| 187.8864592                                              | 0.052655119                                                | 0.365550472                                               |
| 282.0556826                                              | 0.041034264                                                | 0.460804789                                               |
| 558.3285945                                              | 0.046003714                                                | 0.465488102                                               |
| 132.1126458                                              | 0.058893293                                                | 0.391701258                                               |
| 328.499102                                               | 0.044369205                                                | 0.447575358                                               |
| 287.4748685                                              | 0.044949524                                                | 0.479732916                                               |
| 210.0983298                                              | 0.049800748                                                | 0.390708151                                               |
| 232.9648341                                              | 0.04878223                                                 | 0.393357882                                               |
| 217.3402573                                              | 0.045567169                                                | 0.420179032                                               |
| 332.4528059                                              | 0.047450315                                                | 0.4191628                                                 |
| 167.4506517                                              | 0.053940484                                                | 0.447008997                                               |
| 683.7587522                                              | 0.039725208                                                | 0.468019041                                               |
| 257.802933                                               | 0.049189992                                                | 0.466857123                                               |
| 183.4405058                                              | 0.070617064                                                | 0.447092894                                               |
| 323.457167                                               | 0.04711052                                                 | 0.38800091                                                |
| 275.1723691                                              | 0.048458579                                                | 0.42019914                                                |
| 184.7198034                                              | 0.051571854                                                | 0.418185723                                               |
| 481.9954276                                              | 0.046493261                                                | 0.421203156                                               |
| 137.6973932                                              | 0.057219927                                                | 0.414543159                                               |
| 233.6190158                                              | 0.051962168                                                | 0.442005178                                               |
| 358.279259                                               | 0.038636474                                                | 0.517273915                                               |
| 453.1458468                                              | 0.039960232                                                | 0.451393138                                               |
| 389.9053369                                              | 0.044714403                                                | 0.475129767                                               |
| 230.2658229                                              | 0.045196281                                                | 0.470299587                                               |
| 490.9028287                                              | 0.060582743                                                | 0.434561062                                               |
| 356.5613556                                              | 0.046346739                                                | 0.424168581                                               |
| 501.6551694                                              | 0.042882217                                                | 0.437013661                                               |
| 366.4413497                                              | 0.057170675                                                | 0.424141608                                               |
| 1513.236666                                              | 0.055673427                                                | 0.3765495                                                 |
| 121.946931                                               | 0.05749377                                                 | 0.477750089                                               |
| 294.0706049                                              | 0.042364184                                                | 0.432730437                                               |
| 233.0953001                                              | 0.045857461                                                | 0.492550739                                               |
| 382.6054057                                              | 0.046771295                                                | 0.413171853                                               |
| 263.0998389                                              | 0.049768972                                                | 0.459981204                                               |
| 365.0470329                                              | 0.042292086                                                | 0.474493231                                               |
| 375.4531344                                              | 0.04770139                                                 | 0.467882576                                               |
| 231.144926                                               | 0.05432222                                                 | 0.42042926                                                |
| 319.7445174                                              | 0.049225768                                                | 0.431459009                                               |
| 245.0860307                                              | 0.053776893                                                | 0.420978938                                               |
| 446.8179672                                              | 0.045173178                                                | 0.4689038                                                 |
| 359.5236372                                              | 0.040573426                                                | 0.485789537                                               |
| 216.7646128                                              | 0.048641719                                                | 0.436425676                                               |
| 160.4514601                                              | 0.048644083                                                | 0.481122169                                               |
| 230.7635631                                              | 0.048065186                                                | 0.412685818                                               |
| 259.2252985                                              | 0.044098657                                                | 0.435921424                                               |
| 360.3228859                                              | 0.041560331                                                | 0.458221488                                               |
| 485.8279135                                              | 0.035950065                                                | 0.519448396                                               |
| 1659.778716                                              | 0.038181944                                                | 0.469391243                                               |
| 233.1314517                                              | 0.05632716                                                 | 0.488040123                                               |
| 199.5757758                                              | 0.052307864                                                | 0.409824014                                               |
| 498.0439802                                              | 0.053660583                                                | 0.432285847                                               |
| 266.4398143                                              | 0.050731875                                                | 0.416825318                                               |
| 293.3657907                                              | 0.046887165                                                | 0.403245725                                               |
| 238.7727121                                              | 0.066398866                                                | 0.40831758                                                |
| 310.5597056                                              | 0.051013589                                                | 0.594118957                                               |
| 888.9685468                                              | 0.044672498                                                | 0.433918893                                               |
| 503.1783916                                              | 0.036230825                                                | 0.480759679                                               |
| 367.4275691                                              | 0.042873346                                                | 0.523941399                                               |
| 301.4515738                                              | 0.048851721                                                | 0.431125352                                               |
| 342.4160659                                              | 0.052022115                                                | 0.42929374                                                |
| 523.0617187                                              | 0.035731453                                                | 0.549431181                                               |
| 390.8122048                                              | 0.047480524                                                | 0.436929121                                               |
| 237.1113749                                              | 0.052977839                                                | 0.578947368                                               |
| 154.5365134                                              | 0.05502337                                                 | 0.383867833                                               |
| 332.44667                                                | 0.040987617                                                | 0.502408822                                               |

| log.sigma.1.5.mm.3D_glszm_SizeZoneNonUniformity | log.sigma.1.5.mm.3D_glszm_GrayLevelNonUniformity | log.sigma.1.5.mm.3D_glszm_LargeAreaEmphasis | log.sigma.1.5.mm.3D_glszm_ZoneVariance |
|-------------------------------------------------|--------------------------------------------------|---------------------------------------------|----------------------------------------|
| 182.0446927                                     | 15.92178771                                      | 16.87709497                                 | 12.98804657                            |
| 270.7756714                                     | 29.94470774                                      | 321.7045814                                 | 310.9383038                            |
| 109.9009009                                     | 9.81981982                                       | 12.33333333                                 | 8.511484457                            |
| 664.5376884                                     | 53.65039483                                      | 17.17516152                                 | 13.5970077                             |
| 62.78205128                                     | 8.435897436                                      | 14.00641026                                 | 8.710511177                            |
| 116.8916968                                     | 15.35379061                                      | 15.75812274                                 | 10.36969073                            |
| 57.46043165                                     | 9.18705036                                       | 17.96402878                                 | 12.08602039                            |
| 231.1462451                                     | 21.50197628                                      | 9.95256917                                  | 6.031229983                            |
| 396.5949633                                     | 41.36935992                                      | 15.97376705                                 | 11.21468517                            |
| 606.0884676                                     | 58.84992101                                      | 88.82622433                                 | 82.83803648                            |
| 138.9887006                                     | 20.19774011                                      | 15.67514124                                 | 10.21750614                            |
| 325.5279035                                     | 26.34238311                                      | 38.07541478                                 | 33.07887499                            |
| 351.3183962                                     | 46.54716981                                      | 22.56132075                                 | 16.57960462                            |
| 185.4573991                                     | 25.86995516                                      | 40.73991031                                 | 34.45623278                            |
| 198.9111111                                     | 22.91111111                                      | 9.491111111                                 | 5.392735802                            |
| 657.3477089                                     | 82.11859838                                      | 4265.37938                                  | 4243.465121                            |
| 113.3822526                                     | 15.23208191                                      | 14.54607509                                 | 8.870947827                            |
| 292.1105398                                     | 40.01285347                                      | 62.07969152                                 | 53.09510907                            |
| 116.4                                           | 14.49285714                                      | 10.97142857                                 | 6.650969388                            |
| 280.4112676                                     | 42.34366197                                      | 580.2183099                                 | 564.6547292                            |
| 873.6565547                                     | 88.77681473                                      | 538.2957746                                 | 530.2874265                            |
| 317.1113924                                     | 38.82025316                                      | 12.35443038                                 | 7.614164397                            |
| 435.1796407                                     | 55.1497006                                       | 169.9151697                                 | 162.4865528                            |
| 148.1877395                                     | 11.1302682                                       | 11.77394636                                 | 8.377622172                            |
| 230.6589474                                     | 24.99578947                                      | 53.23368421                                 | 46.80879335                            |
| 141.1003344                                     | 13.40133779                                      | 27.26421405                                 | 21.87684702                            |
| 489.3531565                                     | 55.44830741                                      | 403.5901189                                 | 393.5343151                            |
| 315.8943089                                     | 28.20650407                                      | 45.61788618                                 | 40.18860731                            |
| 391.6799557                                     | 39.91472868                                      | 8.450719823                                 | 4.630275113                            |
| 372.4693367                                     | 37.27784731                                      | 442.3429287                                 | 432.2211337                            |
| 611.7338129                                     | 63.48121503                                      | 112.9808153                                 | 106.5232853                            |
| 646.8653846                                     | 106.9864253                                      | 135.9536199                                 | 124.7038183                            |
| 425.0857741                                     | 39.28870293                                      | 22.39853556                                 | 17.87623969                            |
| 28.90163934                                     | 3.491803279                                      | 4.721311475                                 | 1.814565977                            |
| 101.6073298                                     | 8.371727749                                      | 6.345549738                                 | 3.324141334                            |
| 299.3858364                                     | 43.12454212                                      | 15.64835165                                 | 9.565111865                            |
| 573.2411576                                     | 51.04662379                                      | 60.46141479                                 | 55.10166872                            |
| 672.1648199                                     | 66.42936288                                      | 62.20498615                                 | 56.80998266                            |
| 140.2290503                                     | 21.08379888                                      | 15.85195531                                 | 10.41185512                            |
| 217.9691992                                     | 21.60780287                                      | 21.10677618                                 | 16.46704249                            |
| 276.8058925                                     | 25.93587522                                      | 112.9774697                                 | 106.4515257                            |
| 157.0646766                                     | 20.0199005                                       | 17.55472637                                 | 11.93476028                            |
| 290.691475                                      | 36.05006766                                      | 10.93640054                                 | 5.99946532                             |
| 197.0639659                                     | 21.37100213                                      | 12.56929638                                 | 7.792881465                            |
| 374.7315436                                     | 42.42058166                                      | 12.86129754                                 | 8.448478297                            |
| 379.9576471                                     | 45.84941176                                      | 134.7294118                                 | 127.8588457                            |
| 987.0521574                                     | 83.78046468                                      | 31.29634898                                 | 27.20479257                            |
| 138.6565657                                     | 14.60942761                                      | 9.087542088                                 | 5.234318494                            |
| 29.95522388                                     | 4.731343284                                      | 8.925373134                                 | 4.925373134                            |
| 92.73221757                                     | 11.25941423                                      | 9.527196653                                 | 5.202885104                            |
| 577.7738182                                     | 66.63054545                                      | 80.976                                      | 74.77499451                            |
| 161.4196891                                     | 19.90673575                                      | 11.52072539                                 | 6.930474644                            |
| 657.0769231                                     | 72.52948718                                      | 72.64294872                                 | 66.64358933                            |
| 109.4393939                                     | 15.10606061                                      | 11.67045455                                 | 6.658961777                            |
| 845.9979101                                     | 99.45559039                                      | 1341.463427                                 | 1329.84865                             |
| 257.6024096                                     | 19.24096386                                      | 7.572289157                                 | 4.456851502                            |
| 510.9770318                                     | 45.23498233                                      | 8.785335689                                 | 5.032285176                            |
| 320.7125926                                     | 30.18222222                                      | 8.567407407                                 | 4.898054321                            |
| 165.5454545                                     | 15.90909091                                      | 44                                          | 38.65234375                            |
| 148.619883                                      | 20.71929825                                      | 44.15497076                                 | 37.51907425                            |
| 402.1118143                                     | 43.93670886                                      | 21.5221519                                  | 16.5258895                             |
| 995.5171203                                     | 97.6856892                                       | 138.0807726                                 | 132.2979933                            |
| 431.3520157                                     | 58.1425762                                       | 211.2330383                                 | 202.0014793                            |
| 260.5722543                                     | 38.52601156                                      | 822.1719653                                 | 806.5968521                            |
| 50.64150943                                     | 6.094339623                                      | 10.51886792                                 | 6.327963688                            |
| 302.0458453                                     | 29.57020057                                      | 22.79369663                                 | 17.32906339                            |
| 113.7792208                                     | 10.59307359                                      | 5.272727273                                 | 2.363561403                            |
| 554.889799                                      | 62.81384959                                      | 33.24274013                                 | 27.57600065                            |
| 103.9557522                                     | 11.24778761                                      | 8.539823009                                 | 4.645312867                            |
| 447.9216102                                     | 39.92372881                                      | 20.7404661                                  | 16.20230245                            |
| 604.0364059                                     | 61.58249419                                      | 35.79550736                                 | 30.25059504                            |
| 194.6587473                                     | 25.1511879                                       | 26.92224622                                 | 20.97623257                            |
| 723.1252983                                     | 82.50238663                                      | 425.1551313                                 | 415.6469603                            |
| 872.6893391                                     | 111.4794983                                      | 586.0434153                                 | 575.5474407                            |
| 1590.052787                                     | 153.1822471                                      | 482.2365084                                 | 474.9077605                            |
| 307.0189873                                     | 25.64240506                                      | 5.683544304                                 | 2.565414196                            |
| 224.7592233                                     | 25.05048544                                      | 11.85436893                                 | 7.150102743                            |
| 142.4121622                                     | 14.39864865                                      | 15.85135135                                 | 11.60441015                            |
| 316.9427083                                     | 36.9140625                                       | 20.296875                                   | 15.02124023                            |
| 537.0551948                                     | 54.32954545                                      | 27.68993506                                 | 22.35353506                            |
| 126.0109091                                     | 11.42909091                                      | 6.894545455                                 | 5.35656198                             |
| 431.1421687                                     | 29.83855422                                      | 4.398795181                                 | 1.78842938                             |
| 669.8213034                                     | 54.4856342                                       | 21.25297828                                 | 17.42488174                            |
| 35.13888889                                     | 4.055555556                                      | 9.041666667                                 | 4.98591821                             |
| 549.1641791                                     | 70.09253731                                      | 39.81567164                                 | 33.41175039                            |
| 721.9173653                                     | 89.61317365                                      | 519.8646707                                 | 509.1125548                            |
| 149.2234637                                     | 18.16201117                                      | 12.43575419                                 | 7.713023938                            |
| 311.3056995                                     | 36.19689119                                      | 8.621761658                                 | 4.580203495                            |
| 37.56521739                                     | 6.108695652                                      | 7.402173913                                 | 3.445534026                            |
| 39.80597015                                     | 3.417910448                                      | 3.925373134                                 | 1.46936957                             |
| 679.0830671                                     | 69.91246006                                      | 149.5980831                                 | 143.1468077                            |
| 177.8810811                                     | 13.40540541                                      | 10.02162162                                 | 6.380745069                            |
| 241.0130435                                     | 19.72173913                                      | 54.32608696                                 | 49.38996219                            |
| 674.2800512                                     | 76.40409207                                      | 133.0102302                                 | 126.171537                             |
| 865.8854735                                     | 104.9286068                                      | 277.1462568                                 | 268.8603076                            |
| 86.81012658                                     | 5.64556962                                       | 4.803797468                                 | 2.239745233                            |
| 219.7753479                                     | 23.88270378                                      | 20.79125249                                 | 14.94697027                            |
| 44                                              | 4.026315789                                      | 4.381578947                                 | 1.762292244                            |
| 56.42857143                                     | 8.088435374                                      | 19.72108844                                 | 13.07381184                            |
| 163.7852761                                     | 13.36196319                                      | 47.75766871                                 | 41.62976589                            |

| log.sigma.1.5.mm.3D_glszm_ZonePercentage | log.sigma.1.5.mm.3D_glszm_LargeAreaLowGrayLevelEmphasis | log.sigma.1.5.mm.3D_glszm_LargeAreaHighGrayLevelEmphasis | log.sigma.1.5.mm.3D_glszm_HighGrayLevelZoneEmphasis |
|------------------------------------------|---------------------------------------------------------|----------------------------------------------------------|-----------------------------------------------------|
| 0.507082153                              | 0.089714712                                             | 4104.53352                                               | 347.3687151                                         |
| 0.30476649                               | 0.889847901                                             | 117802.0079                                              | 440.1990521                                         |
| 0.511520737                              | 0.115900716                                             | 1839.936937                                              | 263.4504505                                         |
| 0.528652751                              | 0.035309952                                             | 9335.592965                                              | 644.22972                                           |
| 0.43454039                               | 0.083714813                                             | 3420.108974                                              | 245.6474359                                         |
| 0.430793157                              | 0.082576527                                             | 3799.234657                                              | 297.0938628                                         |
| 0.412462908                              | 0.055230139                                             | 7269.05036                                               | 380.3309353                                         |
| 0.50499002                               | 0.044471333                                             | 3126.227273                                              | 404.4841897                                         |
| 0.458393458                              | 0.05187058                                              | 5952.585519                                              | 413.4847849                                         |
| 0.408650742                              | 0.238758118                                             | 33946.06872                                              | 478.0221169                                         |
| 0.428053204                              | 0.11109318                                              | 2980.641243                                              | 239.3333333                                         |
| 0.447368421                              | 0.055623593                                             | 27532.10558                                              | 828.8989442                                         |
| 0.408871745                              | 0.164932465                                             | 3773.704009                                              | 226.2429245                                         |
| 0.398926655                              | 0.376527223                                             | 5253.345291                                              | 200.706278                                          |
| 0.493962678                              | 0.037953637                                             | 3392.748889                                              | 389.5955556                                         |
| 0.213617389                              | 16.18008788                                             | 1128779.114                                              | 340.430593                                          |
| 0.419770774                              | 0.155423917                                             | 2285.249147                                              | 186.5494881                                         |
| 0.333619211                              | 0.299223475                                             | 14033.8946                                               | 293.9421594                                         |
| 0.481099656                              | 0.053296366                                             | 3239.45                                                  | 309.7178571                                         |
| 0.2534809                                | 2.935553413                                             | 116379.3451                                              | 255.4647887                                         |
| 0.353369066                              | 1.517667388                                             | 191895.8364                                              | 441.3472373                                         |
| 0.459302326                              | 0.038438864                                             | 4629.432911                                              | 452.7949367                                         |
| 0.366898572                              | 0.786156675                                             | 37439.97904                                              | 289.4011976                                         |
| 0.542619543                              | 0.044496998                                             | 4549.045977                                              | 389.7509579                                         |
| 0.394518272                              | 0.391354855                                             | 7948.334737                                              | 221.8168421                                         |
| 0.430835735                              | 0.092343872                                             | 9187.826087                                              | 436.3444816                                         |
| 0.315349106                              | 0.821242687                                             | 199615.7877                                              | 565.9130833                                         |
| 0.429169574                              | 0.145400851                                             | 15568.8748                                               | 438.7479675                                         |
| 0.511614731                              | 0.039218882                                             | 2770.723145                                              | 366.1273533                                         |
| 0.314319434                              | 1.70579154                                              | 116081.2278                                              | 311.0100125                                         |
| 0.393519975                              | 0.562403422                                             | 23499.77618                                              | 293.9552358                                         |
| 0.298145025                              | 1.008485436                                             | 19220.98925                                              | 199.2794118                                         |
| 0.470241023                              | 0.068825015                                             | 8344.106695                                              | 452.292887                                          |
| 0.586538462                              | 0.046407488                                             | 1620.147541                                              | 307.8852459                                         |
| 0.575301205                              | 0.037683093                                             | 2050.198953                                              | 376.2984293                                         |
| 0.405445545                              | 0.07000236                                              | 4297.739927                                              | 297.8608059                                         |
| 0.431944444                              | 0.223344549                                             | 17430.62942                                              | 377.6511254                                         |
| 0.43053071                               | 0.094417862                                             | 42003.95222                                              | 778.5387812                                         |
| 0.428742515                              | 0.109248508                                             | 3309.413408                                              | 207.9972067                                         |
| 0.464251668                              | 0.059789973                                             | 8414.071869                                              | 467.7556468                                         |
| 0.391451832                              | 0.352341303                                             | 37357.23917                                              | 390.8214905                                         |
| 0.421825813                              | 0.090571199                                             | 4279.798507                                              | 314.0248756                                         |
| 0.450060901                              | 0.042594216                                             | 3737.277402                                              | 360.8903924                                         |
| 0.457560976                              | 0.071613575                                             | 3261.573561                                              | 320.4264392                                         |
| 0.476038339                              | 0.031575919                                             | 6203.797539                                              | 486.0536913                                         |
| 0.381508079                              | 0.850705192                                             | 22025.53059                                              | 229.9435294                                         |
| 0.494374121                              | 0.03824202                                              | 26699.4642                                               | 950.4167852                                         |
| 0.509433962                              | 0.044864041                                             | 2581.804714                                              | 351.4208754                                         |
| 0.5                                      | 0.192954986                                             | 2142.104478                                              | 251.3731343                                         |
| 0.480885312                              | 0.025870884                                             | 4865.543933                                              | 499.539749                                          |
| 0.401577103                              | 0.25749017                                              | 26293.49455                                              | 394.0254545                                         |
| 0.466747279                              | 0.079949085                                             | 2517.619171                                              | 267.0906736                                         |
| 0.408270086                              | 0.117221509                                             | 46025.85385                                              | 704.3544872                                         |
| 0.446700508                              | 0.113915602                                             | 1822.147727                                              | 198.3636364                                         |
| 0.293423272                              | 5.15509861                                              | 350571.848                                               | 326.7575758                                         |
| 0.566552901                              | 0.027475969                                             | 3088.190763                                              | 474.87751                                           |
| 0.51618787                               | 0.022319502                                             | 4496.847173                                              | 631.5106007                                         |
| 0.522041763                              | 0.020508439                                             | 4791.127407                                              | 543.277037                                          |
| 0.432432432                              | 0.187844342                                             | 11604.6875                                               | 314.3465909                                         |
| 0.388195233                              | 0.082882274                                             | 25170.16959                                              | 710.4707602                                         |
| 0.44738084                               | 0.057568338                                             | 8854.661392                                              | 515.7816456                                         |
| 0.415845199                              | 0.220917447                                             | 87297.33187                                              | 719.6290606                                         |
| 0.329126214                              | 0.482220294                                             | 93519.85447                                              | 531.7315634                                         |
| 0.253387038                              | 0.352616119                                             | 1926564.777                                              | 2376.015896                                         |
| 0.488479263                              | 0.157037031                                             | 1290.037736                                              | 165.1698113                                         |
| 0.449452672                              | 0.071995675                                             | 7799.967049                                              | 422.0515759                                         |
| 0.586294416                              | 0.033827438                                             | 1645.458874                                              | 326.4025974                                         |
| 0.420081326                              | 0.072124447                                             | 16353.61653                                              | 560.9664929                                         |
| 0.506726457                              | 0.036750148                                             | 2782.69469                                               | 364.119469                                          |
| 0.4694182                                | 0.058347926                                             | 8344.961864                                              | 490.5497881                                         |
| 0.424671053                              | 0.088392486                                             | 15321.27266                                              | 518.8830364                                         |
| 0.410097431                              | 0.123862432                                             | 6883.933045                                              | 337.6198704                                         |
| 0.324303406                              | 1.175760756                                             | 154851.6993                                              | 449.7983294                                         |
| 0.308665873                              | 2.03797165                                              | 169625.3222                                              | 350.4544139                                         |
| 0.369389978                              | 0.871276255                                             | 268332.4255                                              | 617.0524919                                         |
| 0.566308244                              | 0.018977946                                             | 2689.974684                                              | 492.8686709                                         |
| 0.461056401                              | 0.062506101                                             | 3003.6                                                   | 305.3495146                                         |
| 0.485245902                              | 0.16627778                                              | 2150.702703                                              | 218.9763514                                         |
| 0.43537415                               | 0.099646161                                             | 5074.398438                                              | 339.3476563                                         |
| 0.432888264                              | 0.106748361                                             | 8009.332792                                              | 359.9902597                                         |
| 0.545634921                              | 0.025227821                                             | 2809.058182                                              | 498.0545455                                         |
| 0.618941089                              | 0.011247178                                             | 2781.939759                                              | 656.1409639                                         |
| 0.511103152                              | 0.010656248                                             | 46012.92852                                              | 2295.934828                                         |
| 0.496551724                              | 0.056387415                                             | 2624.666667                                              | 303.125                                             |
| 0.395163669                              | 0.197548976                                             | 8847.092537                                              | 289.3828358                                         |
| 0.304967129                              | 0.835898419                                             | 324943.2892                                              | 711.1706587                                         |
| 0.460154242                              | 0.050295793                                             | 3811.326816                                              | 387.547486                                          |
| 0.49742268                               | 0.028415934                                             | 3494.304404                                              | 448.9430052                                         |
| 0.50273224                               | 0.038600522                                             | 2393.804348                                              | 357.4782609                                         |
| 0.638095238                              | 0.045346731                                             | 1794.507463                                              | 400.7761194                                         |
| 0.393710692                              | 0.120506893                                             | 187845.3591                                              | 1301.083706                                         |
| 0.52407932                               | 0.022801506                                             | 5710.508108                                              | 669.5243243                                         |
| 0.450097847                              | 0.139433799                                             | 22248.47391                                              | 473.5847826                                         |
| 0.382396088                              | 0.37289998                                              | 48649.34655                                              | 429.6227621                                         |
| 0.347399242                              | 0.713691488                                             | 108803.9782                                              | 490.7764006                                         |
| 0.624505929                              | 0.018430618                                             | 2708.867089                                              | 668.3860759                                         |
| 0.413651316                              | 0.043181026                                             | 12353.14513                                              | 579.4652087                                         |
| 0.617886179                              | 0.048049452                                             | 1156.315789                                              | 300.7236842                                         |
| 0.387862797                              | 0.106576549                                             | 4702.408163                                              | 245.3333333                                         |
| 0.403965304                              | 0.156486008                                             | 15747.73006                                              | 422.9110429                                         |

| log.sigma.1.5.mm.3D_glszm_SmallAreaEmphasis | log.sigma.1.5.mm.3D_glszm_LowGrayLevelZoneEmphasis | log.sigma.1.5.mm.3D_glszm_ZoneEntropy | log.sigma.1.5.mm.3D_glszm_SmallAreaLowGrayLevelEmphasis |
|---------------------------------------------|----------------------------------------------------|---------------------------------------|---------------------------------------------------------|
| 0.740940112                                 | 0.012414711                                        | 5.944465448                           | 0.010927753                                             |
| 0.680115105                                 | 0.005093741                                        | 6.204439247                           | 0.004023652                                             |
| 0.730903955                                 | 0.017297958                                        | 5.740481625                           | 0.014593249                                             |
| 0.71799146                                  | 0.00342816                                         | 6.391684823                           | 0.002799802                                             |
| 0.658618216                                 | 0.018156022                                        | 5.799749178                           | 0.015695208                                             |
| 0.674520063                                 | 0.009227792                                        | 5.822417402                           | 0.007676549                                             |
| 0.668333648                                 | 0.011177803                                        | 5.570756788                           | 0.010133225                                             |
| 0.702579167                                 | 0.00743411                                         | 6.152252506                           | 0.006200306                                             |
| 0.669383948                                 | 0.005704851                                        | 6.329370388                           | 0.004488174                                             |
| 0.71941635                                  | 0.004553527                                        | 6.197598506                           | 0.003751776                                             |
| 0.651121337                                 | 0.011853439                                        | 5.927934477                           | 0.00923898                                              |
| 0.728227241                                 | 0.003249222                                        | 6.263481708                           | 0.002851247                                             |
| 0.668806175                                 | 0.012484807                                        | 6.126579987                           | 0.010084701                                             |
| 0.669957187                                 | 0.01420133                                         | 5.906137042                           | 0.00974718                                              |
| 0.69080925                                  | 0.011169061                                        | 6.001622556                           | 0.010103573                                             |
| 0.692206397                                 | 0.005589668                                        | 6.161597815                           | 0.004151056                                             |
| 0.646132515                                 | 0.019832972                                        | 5.956686963                           | 0.015132005                                             |
| 0.636691798                                 | 0.007310066                                        | 6.381918061                           | 0.005428329                                             |
| 0.669002486                                 | 0.01004404                                         | 5.886428991                           | 0.008292353                                             |
| 0.65321819                                  | 0.009951589                                        | 6.119367978                           | 0.007906676                                             |
| 0.715355217                                 | 0.003981307                                        | 6.113490582                           | 0.003067534                                             |
| 0.656871142                                 | 0.004401472                                        | 6.239604892                           | 0.003356378                                             |
| 0.685193964                                 | 0.006698896                                        | 6.029739711                           | 0.00502555                                              |
| 0.780170104                                 | 0.013541651                                        | 5.73934648                            | 0.012754986                                             |
| 0.723567211                                 | 0.013497905                                        | 5.82042272                            | 0.010799014                                             |
| 0.714049475                                 | 0.008771645                                        | 5.950606982                           | 0.007766348                                             |
| 0.696006008                                 | 0.003474878                                        | 6.188857986                           | 0.002804684                                             |
| 0.743925445                                 | 0.005187719                                        | 5.946176836                           | 0.003106545                                             |
| 0.683453509                                 | 0.00862266                                         | 6.2410491                             | 0.00697068                                              |
| 0.70982121                                  | 0.007405759                                        | 6.158116763                           | 0.005879873                                             |
| 0.726794271                                 | 0.007206859                                        | 6.031988226                           | 0.005519765                                             |
| 0.627921955                                 | 0.011225192                                        | 6.303984039                           | 0.008272655                                             |
| 0.693083538                                 | 0.006042541                                        | 6.361049635                           | 0.004956407                                             |
| 0.71377163                                  | 0.028269092                                        | 5.102387747                           | 0.025572081                                             |
| 0.756652208                                 | 0.012733669                                        | 5.725941978                           | 0.010902687                                             |
| 0.627289395                                 | 0.007091584                                        | 6.329671539                           | 0.005309275                                             |
| 0.705933351                                 | 0.006541555                                        | 6.301400755                           | 0.004567019                                             |
| 0.709481725                                 | 0.002324457                                        | 6.199969959                           | 0.001882935                                             |
| 0.649368736                                 | 0.016818828                                        | 5.903153664                           | 0.014235185                                             |
| 0.695142418                                 | 0.005568604                                        | 6.125986295                           | 0.004696933                                             |
| 0.720089669                                 | 0.006998955                                        | 6.04705601                            | 0.005939034                                             |
| 0.648804697                                 | 0.008820014                                        | 6.148962132                           | 0.007005173                                             |
| 0.651036116                                 | 0.006209431                                        | 6.268426958                           | 0.004850442                                             |
| 0.673653013                                 | 0.012123072                                        | 6.228657071                           | 0.010272215                                             |
| 0.672796835                                 | 0.004206839                                        | 6.292778102                           | 0.003307505                                             |
| 0.695266494                                 | 0.010268982                                        | 5.984261306                           | 0.007877403                                             |
| 0.711451265                                 | 0.00196337                                         | 6.42850583                            | 0.001602092                                             |
| 0.710408572                                 | 0.008373405                                        | 5.822261336                           | 0.007120393                                             |
| 0.693830846                                 | 0.026437078                                        | 5.102964937                           | 0.010835536                                             |
| 0.640087643                                 | 0.007049159                                        | 6.031231954                           | 0.006099194                                             |
| 0.673898664                                 | 0.004751629                                        | 6.290264438                           | 0.003572788                                             |
| 0.671973475                                 | 0.011950359                                        | 6.010597171                           | 0.009394324                                             |
| 0.673612933                                 | 0.002473777                                        | 6.320361672                           | 0.001914164                                             |
| 0.668596382                                 | 0.022963214                                        | 5.803588507                           | 0.019768299                                             |
| 0.691409611                                 | 0.005748935                                        | 6.223873984                           | 0.004270723                                             |
| 0.74673552                                  | 0.006415913                                        | 6.076018711                           | 0.0055616                                               |
| 0.69823399                                  | 0.003423664                                        | 6.398977541                           | 0.002750981                                             |
| 0.71679124                                  | 0.004712524                                        | 6.135988198                           | 0.003961718                                             |
| 0.713148913                                 | 0.017419213                                        | 6.018205419                           | 0.015821472                                             |
| 0.685533773                                 | 0.005296783                                        | 5.784043093                           | 0.004804261                                             |
| 0.676346507                                 | 0.003903686                                        | 6.249932508                           | 0.003076786                                             |
| 0.687389642                                 | 0.00230474                                         | 6.462961887                           | 0.001765939                                             |
| 0.677344608                                 | 0.003527283                                        | 6.134047322                           | 0.002780905                                             |
| 0.637035716                                 | 0.001904077                                        | 6.224879714                           | 0.001745896                                             |
| 0.718343607                                 | 0.03512417                                         | 5.345660965                           | 0.030299999                                             |
| 0.682263811                                 | 0.005876119                                        | 6.285961377                           | 0.004657658                                             |
| 0.729718081                                 | 0.013743564                                        | 5.773184353                           | 0.012544824                                             |
| 0.667269092                                 | 0.00332864                                         | 6.371372492                           | 0.00255569                                              |
| 0.704991917                                 | 0.009367818                                        | 5.805186782                           | 0.008224445                                             |
| 0.716264844                                 | 0.004522824                                        | 6.250727072                           | 0.003588666                                             |
| 0.71125622                                  | 0.003412141                                        | 6.169292214                           | 0.002696595                                             |
| 0.673691448                                 | 0.007125939                                        | 6.055231713                           | 0.005683399                                             |
| 0.68325496                                  | 0.00393355                                         | 6.322139979                           | 0.002949986                                             |
| 0.674726876                                 | 0.005189844                                        | 6.247643635                           | 0.00385203                                              |
| 0.712044126                                 | 0.002701041                                        | 6.369317021                           | 0.002117434                                             |
| 0.724713447                                 | 0.005843482                                        | 6.201763683                           | 0.004919285                                             |
| 0.687106817                                 | 0.008346116                                        | 6.093609438                           | 0.006752713                                             |
| 0.721089458                                 | 0.020771552                                        | 5.743949627                           | 0.018340424                                             |
| 0.66623838                                  | 0.008229018                                        | 6.210996798                           | 0.00660934                                              |
| 0.686292368                                 | 0.006494755                                        | 6.338149235                           | 0.00509662                                              |
| 0.703742867                                 | 0.007473118                                        | 6.035967141                           | 0.006604564                                             |
| 0.749053433                                 | 0.004348954                                        | 6.255660072                           | 0.003845465                                             |
| 0.712286562                                 | 0.001188037                                        | 6.45186902                            | 0.001048951                                             |
| 0.722665697                                 | 0.021375889                                        | 5.227226349                           | 0.019773714                                             |
| 0.665399256                                 | 0.007664663                                        | 6.227650615                           | 0.005855726                                             |
| 0.683901071                                 | 0.002315286                                        | 6.271350816                           | 0.00179334                                              |
| 0.670043008                                 | 0.00689695                                         | 5.99645355                            | 0.005698338                                             |
| 0.659185123                                 | 0.00520868                                         | 6.22950408                            | 0.004172939                                             |
| 0.66102506                                  | 0.014399441                                        | 5.172685055                           | 0.013174823                                             |
| 0.79371476                                  | 0.038079384                                        | 5.060356683                           | 0.037450513                                             |
| 0.684739921                                 | 0.001657345                                        | 6.392241959                           | 0.001396359                                             |
| 0.720720345                                 | 0.005156904                                        | 6.233215559                           | 0.004541098                                             |
| 0.751598366                                 | 0.006295758                                        | 5.988503936                           | 0.005509019                                             |
| 0.682617618                                 | 0.005152865                                        | 6.320459118                           | 0.004010549                                             |
| 0.681124755                                 | 0.003646217                                        | 6.251480026                           | 0.002803844                                             |
| 0.769234012                                 | 0.009578992                                        | 5.851001913                           | 0.00902508                                              |
| 0.687088258                                 | 0.007854032                                        | 6.218049957                           | 0.007163529                                             |
| 0.78508578                                  | 0.0203341                                          | 4.973008395                           | 0.018962083                                             |
| 0.641018336                                 | 0.016869663                                        | 5.69126389                            | 0.014997016                                             |
| 0.736185765                                 | 0.007407057                                        | 6.004402238                           | 0.006121847                                             |

| log.sigma.1.5.mm.3D_ngtdm_Coarseness | log.sigma.1.5.mm.3D_ngtdm_Complexity | log.sigma.1.5.mm.3D_ngtdm_Strength | log.sigma.1.5.mm.3D_ngtdm_Busyness | log.sigma.1.5.mm.3D_ngtdm_Contrast |
|--------------------------------------|--------------------------------------|------------------------------------|------------------------------------|------------------------------------|
| 0.008719803                          | 2.607110896                          | 2.824959214                        | 0.219075728                        | 0.0003703                          |
| 0.003856412                          | 0.551584086                          | 1.210681326                        | 0.338803797                        | 4.96E-05                           |
| 0.014139549                          | 4.291369236                          | 5.236045949                        | 0.168759889                        | 0.000616003                        |
| 0.00263737                           | 1.664172302                          | 1.826547247                        | 0.278268552                        | 6.39E-05                           |
| 0.016491875                          | 2.895266722                          | 4.977359234                        | 0.121768409                        | 0.000438144                        |
| 0.009395383                          | 1.430294188                          | 1.976230435                        | 0.2637826                          | 0.000313858                        |
| 0.016934536                          | 2.275977944                          | 4.117524265                        | 0.098266576                        | 0.000456212                        |
| 0.005706                             | 1.88556781                           | 1.94556901                         | 0.296777818                        | 0.000289504                        |
| 0.00323213                           | 0.830708851                          | 1.121330365                        | 0.455619464                        | 9.37E-05                           |
| 0.002236744                          | 0.829683169                          | 1.393969745                        | 0.399209243                        | 2.95E-05                           |
| 0.006781425                          | 1.100941187                          | 1.405398998                        | 0.388217527                        | 0.000234943                        |
| 0.004674683                          | 2.245590542                          | 2.97599312                         | 0.143750021                        | 9.63E-05                           |
| 0.00307394                           | 0.623449193                          | 1.11798204                         | 0.653193239                        | 5.49E-05                           |
| 0.005787924                          | 0.635410296                          | 1.050559351                        | 0.556486136                        | 0.000151349                        |
| 0.006934445                          | 1.563169839                          | 2.103651826                        | 0.227861614                        | 0.000195857                        |
| 0.001068174                          | 0.19584988                           | 0.988911824                        | 0.888976165                        | 3.62E-06                           |
| 0.008814821                          | 1.249436919                          | 1.782095111                        | 0.360265047                        | 0.000304832                        |
| 0.003152742                          | 0.442677863                          | 0.880048529                        | 0.610491275                        | 4.94E-05                           |
| 0.011102532                          | 1.958201647                          | 2.780319989                        | 0.185682766                        | 0.000401314                        |
| 0.002799627                          | 0.255778767                          | 0.695984103                        | 0.679436328                        | 2.42E-05                           |
| 0.001367312                          | 0.315036506                          | 0.603458813                        | 0.802379866                        | 1.60E-05                           |
| 0.003826201                          | 0.922897618                          | 1.410474336                        | 0.373887176                        | 9.09E-05                           |
| 0.002480401                          | 0.304673312                          | 0.565726447                        | 0.884803379                        | 4.65E-05                           |
| 0.013268058                          | 3.608125343                          | 4.136800595                        | 0.113144738                        | 0.000524487                        |
| 0.00540714                           | 1.135061137                          | 2.104114027                        | 0.400189322                        | 0.000105957                        |
| 0.009802123                          | 2.643235462                          | 3.466660165                        | 0.137931889                        | 0.000259798                        |
| 0.002210101                          | 0.436636122                          | 1.062553453                        | 0.404787993                        | 1.84E-05                           |
| 0.004838082                          | 1.146139355                          | 1.900947951                        | 0.276926508                        | 9.91E-05                           |
| 0.003683623                          | 1.027765956                          | 1.219294878                        | 0.432335404                        | 0.000127191                        |
| 0.002989545                          | 0.559691439                          | 1.340129919                        | 0.450739504                        | 3.18E-05                           |
| 0.00214336                           | 0.596200298                          | 1.142977488                        | 0.643950485                        | 2.77E-05                           |
| 0.001280419                          | 0.133458895                          | 0.393080851                        | 1.660784343                        | 1.06E-05                           |
| 0.003329913                          | 1.476603532                          | 1.83843406                         | 0.310336578                        | 7.75E-05                           |
| 0.038459993                          | 11.01010481                          | 11.93537373                        | 0.059485869                        | 0.005162875                        |
| 0.01648654                           | 5.19580971                           | 4.572114257                        | 0.119304467                        | 0.001234391                        |
| 0.003290583                          | 0.537409953                          | 0.823026854                        | 0.597010988                        | 7.65E-05                           |
| 0.002352805                          | 0.74039127                           | 1.009199974                        | 0.597536783                        | 5.91E-05                           |
| 0.001998804                          | 0.58803765                           | 0.862964768                        | 0.445465963                        | 4.03E-05                           |
| 0.007009842                          | 0.93741389                           | 1.349839476                        | 0.384883059                        | 0.000226847                        |
| 0.006024249                          | 2.014556666                          | 2.544373141                        | 0.206516794                        | 0.000170974                        |
| 0.005022742                          | 1.126917164                          | 1.751499147                        | 0.257884396                        | 8.81E-05                           |
| 0.006675146                          | 1.301284117                          | 1.808266113                        | 0.295845272                        | 0.000199003                        |
| 0.003762493                          | 0.939339061                          | 1.193245654                        | 0.42161254                         | 0.000115153                        |
| 0.006351863                          | 1.702570391                          | 2.15546614                         | 0.262108937                        | 0.000201171                        |
| 0.00329279                           | 1.174944465                          | 1.475605803                        | 0.328206226                        | 8.15E-05                           |
| 0.003049497                          | 0.506618309                          | 0.961917767                        | 0.701463657                        | 4.99E-05                           |
| 0.001609975                          | 1.051932533                          | 1.329445139                        | 0.335372565                        | 2.99E-05                           |
| 0.009792565                          | 2.389310907                          | 2.736000748                        | 0.203035781                        | 0.000392469                        |
| 0.033509862                          | 5.626624654                          | 8.392210703                        | 0.072149661                        | 0.002118785                        |
| 0.011842924                          | 2.855587094                          | 3.545413525                        | 0.123582763                        | 0.000491911                        |
| 0.002123333                          | 0.474978274                          | 0.795896217                        | 0.599239748                        | 3.21E-05                           |
| 0.006599872                          | 1.499212691                          | 1.636597713                        | 0.355248722                        | 0.000322016                        |
| 0.00187372                           | 0.590925413                          | 1.008206152                        | 0.42774107                         | 2.71E-05                           |
| 0.010531623                          | 1.326807667                          | 1.97470883                         | 0.304750214                        | 0.000315136                        |
| 0.001173654                          | 0.19071464                           | 0.571260346                        | 1.044123155                        | 8.82E-06                           |
| 0.007126354                          | 2.930586862                          | 2.68986561                         | 0.199030844                        | 0.00036489                         |
| 0.002873924                          | 1.5958877                            | 1.688736997                        | 0.31257912                         | 9.04E-05                           |
| 0.004942143                          | 1.501921209                          | 1.898652695                        | 0.220841494                        | 0.000170315                        |
| 0.008770505                          | 1.716536173                          | 2.744823749                        | 0.188499405                        | 0.000204639                        |
| 0.007147835                          | 1.285170311                          | 2.679323081                        | 0.162552032                        | 0.000131704                        |
| 0.003186208                          | 0.868192309                          | 1.215215151                        | 0.384580649                        | 7.26E-05                           |
| 0.001337242                          | 0.540830487                          | 0.892215517                        | 0.516192917                        | 1.85E-05                           |
| 0.002433633                          | 0.430623156                          | 1.108486315                        | 0.386987224                        | 1.86E-05                           |
| 0.002790257                          | 0.528253231                          | 2.435431557                        | 0.159322938                        | 2.24E-05                           |
| 0.027908022                          | 2.343857802                          | 3.485035281                        | 0.186678722                        | 0.001406197                        |
| 0.004924974                          | 1.295708994                          | 1.877635765                        | 0.253697384                        | 0.000104512                        |
| 0.012389449                          | 4.183438213                          | 3.603570213                        | 0.153684186                        | 0.000943661                        |
| 0.002153784                          | 0.671320752                          | 1.063011272                        | 0.458080873                        | 3.81E-05                           |
| 0.013204876                          | 2.379158759                          | 2.894455682                        | 0.165750945                        | 0.000606646                        |
| 0.003537307                          | 1.21702511                           | 1.657960789                        | 0.308191154                        | 7.92E-05                           |
| 0.002282129                          | 0.460052114                          | 0.726177995                        | 0.59519022                         | 4.91E-05                           |
| 0.005696434                          | 1.074203464                          | 1.617412987                        | 0.319681415                        | 0.000141582                        |
| 0.001425453                          | 0.281669038                          | 0.589971843                        | 0.794282517                        | 1.59E-05                           |
| 0.001116898                          | 0.235588145                          | 0.616990898                        | 1.003530276                        | 8.39E-06                           |
| 0.000846473                          | 0.294807543                          | 0.607630726                        | 0.779241015                        | 7.27E-06                           |
| 0.005413469                          | 2.758141606                          | 2.620519499                        | 0.197243397                        | 0.000218728                        |
| 0.005496932                          | 1.250900699                          | 1.62546366                         | 0.345752449                        | 0.000167782                        |
| 0.008682926                          | 1.898911394                          | 1.964659859                        | 0.375338282                        | 0.000514518                        |
| 0.003565299                          | 0.787207701                          | 1.02545479                         | 0.530731523                        | 0.00010914                         |
| 0.002299046                          | 0.933113615                          | 1.339272502                        | 0.51812525                         | 4.44E-05                           |
| 0.011603114                          | 4.544209017                          | 4.596588788                        | 0.116034577                        | 0.000548433                        |
| 0.004395549                          | 3.316554142                          | 2.768629277                        | 0.190906374                        | 0.000209399                        |
| 0.002708142                          | 1.786414651                          | 2.443945096                        | 0.120912449                        | 5.01E-05                           |
| 0.04216592                           | 5.345880081                          | 9.065059461                        | 0.054764875                        | 0.001763012                        |
| 0.001971736                          | 0.395927912                          | 0.655538576                        | 0.871267151                        | 3.42E-05                           |
| 0.001352589                          | 0.368834699                          | 1.045646474                        | 0.484801392                        | 8.56E-06                           |
| 0.007787382                          | 1.526350916                          | 2.063046055                        | 0.255284831                        | 0.000262793                        |
| 0.003788166                          | 1.002927717                          | 1.211746617                        | 0.409859245                        | 0.00016354                         |
| 0.032322188                          | 2.834306476                          | 4.246517192                        | 0.106801203                        | 0.001681499                        |
| 0.03753191                           | 13.34981562                          | 11.59663975                        | 0.046661208                        | 0.005445612                        |
| 0.001832136                          | 0.878834299                          | 1.752271602                        | 0.241223296                        | 2.09E-05                           |
| 0.008823832                          | 4.437179844                          | 4.334860668                        | 0.121316396                        | 0.000407931                        |
| 0.00721537                           | 1.903694278                          | 2.700550913                        | 0.15961325                         | 0.000149443                        |
| 0.001774573                          | 0.547161313                          | 0.982891693                        | 0.553226201                        | 2.11E-05                           |
| 0.001229639                          | 0.374125069                          | 0.812506968                        | 0.695341918                        | 1.05E-05                           |
| 0.019890009                          | 13.32758463                          | 9.68960852                         | 0.063604224                        | 0.002131954                        |
| 0.005593441                          | 1.813488338                          | 3.213124676                        | 0.146339254                        | 9.31E-05                           |
| 0.038873289                          | 7.988570941                          | 8.790118166                        | 0.068292463                        | 0.003281531                        |
| 0.016515944                          | 2.06922521                           | 3.87552691                         | 0.139413866                        | 0.000414424                        |
| 0.00912736                           | 2.356020361                          | 3.73981476                         | 0.153772478                        | 0.000225378                        |

| log.sigma.1.0.mm.3D_gldm_GrayLevelVariance | log.sigma.1.0.mm.3D_gldm_HighGrayLevelEmphasis | log.sigma.1.0.mm.3D_gldm_GrayLevelNonUniformityNormalized | log.sigma.1.0.mm.3D_gldm_DependenceEntropy |
|--------------------------------------------|------------------------------------------------|-----------------------------------------------------------|--------------------------------------------|
| 12.91855524                                | 123.1685552                                    | 0.085479379                                               | 6.104313138                                |
| 7.150239608                                | 163.1535869                                    | 0.150521949                                               | 6.267764905                                |
| 13.11631167                                | 85.48387097                                    | 0.093886046                                               | 5.899375008                                |
| 16.72551934                                | 330.7077799                                    | 0.075957642                                               | 6.41209765                                 |
| 7.022152218                                | 81.25069638                                    | 0.118209821                                               | 5.723320707                                |
| 7.646829476                                | 135.6920684                                    | 0.104837598                                               | 5.864736013                                |
| 6.229499247                                | 161.1839763                                    | 0.143181678                                               | 5.507902127                                |
| 13.00249401                                | 223.2235529                                    | 0.078184947                                               | 6.164435865                                |
| 10.6328208                                 | 189.2453102                                    | 0.088819434                                               | 6.262399675                                |
| 9.416955003                                | 246.7937379                                    | 0.110982699                                               | 6.170016186                                |
| 6.73167244                                 | 113.7678356                                    | 0.107960037                                               | 5.842387797                                |
| 13.89501367                                | 391.6491228                                    | 0.094034396                                               | 6.23289852                                 |
| 6.440753825                                | 119.246866                                     | 0.115964846                                               | 5.906044026                                |
| 5.825022961                                | 79.61896243                                    | 0.117965572                                               | 6.040128863                                |
| 8.735544708                                | 168.8649835                                    | 0.100914424                                               | 5.94870322                                 |
| 3.960126031                                | 114.6988628                                    | 0.240307886                                               | 5.875701847                                |
| 7.278068325                                | 62.6504298                                     | 0.104018029                                               | 5.910773792                                |
| 6.163153816                                | 117.6865352                                    | 0.122403564                                               | 6.179682755                                |
| 9.171092099                                | 103.314433                                     | 0.094407246                                               | 5.926925024                                |
| 4.03307535                                 | 94.96608354                                    | 0.173649284                                               | 6.062402681                                |
| 7.016858667                                | 160.0769525                                    | 0.135141891                                               | 6.142874702                                |
| 8.241532923                                | 194.9610465                                    | 0.103695241                                               | 6.053678985                                |
| 5.397168359                                | 114.4393995                                    | 0.138445296                                               | 6.072935993                                |
| 11.81034833                                | 171.5883576                                    | 0.088999442                                               | 6.032172273                                |
| 6.848800648                                | 74.11877076                                    | 0.124566782                                               | 6.071430502                                |
| 9.899012948                                | 162.425072                                     | 0.097779236                                               | 6.158944653                                |
| 6.221902471                                | 276.9506636                                    | 0.150379967                                               | 6.243142216                                |
| 8.585766956                                | 185.0509421                                    | 0.11941968                                                | 6.112141508                                |
| 10.55589051                                | 147.6249292                                    | 0.087719828                                               | 6.131982292                                |
| 6.661940609                                | 157.5979544                                    | 0.155096967                                               | 6.234839331                                |
| 7.176039757                                | 113.767537                                     | 0.13174051                                                | 6.013997178                                |
| 3.987991435                                | 77.92478921                                    | 0.164393756                                               | 5.979644225                                |
| 12.92511194                                | 197.5400885                                    | 0.085112854                                               | 6.272250731                                |
| 13.85465976                                | 131.0769231                                    | 0.095968935                                               | 5.213714993                                |
| 14.44943932                                | 150.6777108                                    | 0.076208448                                               | 5.836618862                                |
| 7.381220224                                | 138.7559406                                    | 0.105007352                                               | 6.02185308                                 |
| 11.35134537                                | 166.6565972                                    | 0.108431231                                               | 6.27132316                                 |
| 9.828010254                                | 431.1716506                                    | 0.100260496                                               | 6.204388644                                |
| 6.236402883                                | 81.47904192                                    | 0.114065044                                               | 5.758454741                                |
| 11.32680541                                | 220.1830315                                    | 0.087667132                                               | 6.167130366                                |
| 9.397585742                                | 165.2069199                                    | 0.114716598                                               | 6.334448166                                |
| 8.95176771                                 | 139.5057712                                    | 0.095785221                                               | 6.073847848                                |
| 9.31930884                                 | 163.8081608                                    | 0.093521759                                               | 6.105599633                                |
| 10.87791172                                | 144.2409756                                    | 0.089008923                                               | 6.144655233                                |
| 10.40206936                                | 246.8541001                                    | 0.091269801                                               | 6.159518913                                |
| 7.07932867                                 | 97.15888689                                    | 0.123268729                                               | 6.077702554                                |
| 14.18385564                                | 439.3980309                                    | 0.082932262                                               | 6.394958995                                |
| 9.996851913                                | 163.4082333                                    | 0.091638741                                               | 6.002964599                                |
| 7.681944754                                | 98.5                                           | 0.130875473                                               | 5.237194276                                |
| 9.780906769                                | 194.1830986                                    | 0.096875013                                               | 5.823191224                                |
| 7.914126984                                | 190.0852804                                    | 0.113401518                                               | 6.215001558                                |
| 9.259490386                                | 136.8101572                                    | 0.092791796                                               | 6.021268591                                |
| 8.629941519                                | 388.5686993                                    | 0.11421235                                                | 6.295315225                                |
| 7.141046893                                | 81.5499154                                     | 0.110710288                                               | 5.878677854                                |
| 5.561943071                                | 139.156983                                     | 0.188067017                                               | 5.985308055                                |
| 16.97788753                                | 170.298066                                     | 0.071089937                                               | 6.250760428                                |
| 14.24440656                                | 225.4277246                                    | 0.074736201                                               | 6.296762564                                |
| 12.00181715                                | 226.4555298                                    | 0.093864338                                               | 6.081382859                                |
| 9.623650007                                | 163.7616708                                    | 0.11329679                                                | 6.166847203                                |
| 6.243836008                                | 245.246311                                     | 0.123779731                                               | 5.843284776                                |
| 9.762903825                                | 247.6705993                                    | 0.095506375                                               | 6.12243741                                 |
| 9.996235631                                | 284.2499087                                    | 0.105840002                                               | 6.323211249                                |
| 5.372153727                                | 219.5634304                                    | 0.16036447                                                | 6.004496466                                |
| 5.313680848                                | 1194.187111                                    | 0.182696574                                               | 6.117679834                                |
| 11.572667502                               | 63.7281106                                     | 0.105990783                                               | 5.697032614                                |
| 11.09653128                                | 200.9079202                                    | 0.097040437                                               | 6.214396008                                |
| 13.11446443                                | 165.9568528                                    | 0.080136051                                               | 5.845921576                                |
| 9.025010643                                | 281.5899281                                    | 0.101521416                                               | 6.203311889                                |
| 9.765333105                                | 161.0112108                                    | 0.091717107                                               | 5.919818521                                |
| 11.65151636                                | 195.0377921                                    | 0.096536924                                               | 6.198974354                                |
| 7.95469356                                 | 163.1210526                                    | 0.109735111                                               | 6.156541666                                |
| 7.647543112                                | 161.108946                                     | 0.104467846                                               | 5.941231775                                |
| 6.318407356                                | 162.0222523                                    | 0.141777304                                               | 6.144968179                                |
| 5.42565471                                 | 135.068642                                     | 0.154237558                                               | 6.143177579                                |
| 8.670553633                                | 251.8470588                                    | 0.124845454                                               | 6.302289465                                |
| 15.87325044                                | 252.6084229                                    | 0.073293637                                               | 6.094717144                                |
| 8.929071267                                | 138.1593554                                    | 0.096051981                                               | 6.075754454                                |
| 10.14963988                                | 96.15245902                                    | 0.087890352                                               | 5.950684058                                |
| 9.00270592                                 | 185.0011338                                    | 0.095729789                                               | 6.212204742                                |
| 9.821235337                                | 139.4177793                                    | 0.101438124                                               | 6.222791829                                |
| 13.87394495                                | 215.1309524                                    | 0.080892542                                               | 6.09760895                                 |
| 19.64708296                                | 295.3407905                                    | 0.064544418                                               | 6.191703526                                |
| 16.46740675                                | 1089.053367                                    | 0.086476096                                               | 6.342303526                                |
| 8.698216409                                | 126.6827586                                    | 0.11705113                                                | 5.193438223                                |
| 7.05868858                                 | 140.6652905                                    | 0.116215917                                               | 5.987496876                                |
| 5.797836605                                | 278.1442659                                    | 0.146365894                                               | 6.219808156                                |
| 8.76076189                                 | 163.0886889                                    | 0.096460504                                               | 5.861114774                                |
| 10.86746566                                | 219.3646907                                    | 0.086282914                                               | 6.017989701                                |
| 7.362059184                                | 170.726776                                     | 0.118934576                                               | 5.462551977                                |
| 14.62276644                                | 186.8571429                                    | 0.117823129                                               | 5.051935104                                |
| 9.462893778                                | 610.3849057                                    | 0.114900708                                               | 6.346975315                                |
| 17.21455312                                | 316.1713881                                    | 0.076595591                                               | 6.221074397                                |
| 10.28326044                                | 218.721135                                     | 0.107760387                                               | 6.303512767                                |
| 8.282538005                                | 189.2738386                                    | 0.115618032                                               | 6.264332833                                |
| 6.754020987                                | 247.5275577                                    | 0.131444018                                               | 6.095194824                                |
| 23.20839257                                | 226.8063241                                    | 0.062100642                                               | 5.960280522                                |
| 10.05069942                                | 320.3725329                                    | 0.106510236                                               | 6.149395754                                |
| 11.14693635                                | 149.9268293                                    | 0.09220702                                                | 5.38192505                                 |
| 7.147945225                                | 103.4881266                                    | 0.117856322                                               | 5.723999995                                |
| 11.53197932                                | 119.7744734                                    | 0.108380973                                               | 6.237313285                                |

| log.sigma.1.0.mm.3D_gldm_DependenceNonUniformity | log.sigma.1.0.mm.3D_gldm_GrayLevelNonUniformity | log.sigma.1.0.mm.3D_gldm_SmallDependenceEmphasis |
|--------------------------------------------------|-------------------------------------------------|--------------------------------------------------|
| 128.9716714                                      | 60.34844193                                     | 0.318637268                                      |
| 211.3225806                                      | 312.6340876                                     | 0.198369511                                      |
| 80.92165899                                      | 40.74654378                                     | 0.382938207                                      |
| 512.1666034                                      | 200.1483871                                     | 0.347688703                                      |
| 56.86072423                                      | 42.43732591                                     | 0.24254948                                       |
| 106.4494557                                      | 67.41057543                                     | 0.288215018                                      |
| 51.65875371                                      | 48.25222552                                     | 0.24039091                                       |
| 193.4471058                                      | 78.34131737                                     | 0.331185384                                      |
| 348.8566619                                      | 184.6556037                                     | 0.274432413                                      |
| 445.2207876                                      | 343.8244028                                     | 0.265605074                                      |
| 141.4401451                                      | 89.28295042                                     | 0.265288587                                      |
| 239.5775978                                      | 139.3589744                                     | 0.299382063                                      |
| 330.3375121                                      | 240.5110897                                     | 0.231685545                                      |
| 150.5742397                                      | 131.8855098                                     | 0.21795132                                       |
| 163.428101                                       | 91.93304061                                     | 0.294382567                                      |
| 551.1350223                                      | 1669.418886                                     | 0.131687692                                      |
| 112.7277937                                      | 72.60458453                                     | 0.242701486                                      |
| 291.4571184                                      | 285.4451115                                     | 0.186152128                                      |
| 105.2268041                                      | 54.94501718                                     | 0.250333947                                      |
| 263.7583006                                      | 486.3916458                                     | 0.153684679                                      |
| 610.0995406                                      | 705.9812404                                     | 0.230383793                                      |
| 280.9                                            | 178.355814                                      | 0.266754313                                      |
| 321.3507873                                      | 378.0941047                                     | 0.209425978                                      |
| 90.71309771                                      | 42.80873181                                     | 0.327976144                                      |
| 155.6910299                                      | 149.9784053                                     | 0.25343733                                       |
| 101.2132565                                      | 67.85878963                                     | 0.277832398                                      |
| 354.253895                                       | 521.2169648                                     | 0.197308605                                      |
| 195.9406839                                      | 171.128402                                      | 0.271336019                                      |
| 329.3308782                                      | 154.8254958                                     | 0.283462496                                      |
| 244.9716758                                      | 394.256491                                      | 0.211534631                                      |
| 416.9276502                                      | 418.8030827                                     | 0.246517417                                      |
| 659.0182125                                      | 974.8549747                                     | 0.16609288                                       |
| 365.8086572                                      | 173.0344319                                     | 0.305227407                                      |
| 25.98076923                                      | 9.980769231                                     | 0.375316425                                      |
| 76.74698795                                      | 25.30120482                                     | 0.39354261                                       |
| 326.0970297                                      | 212.1148515                                     | 0.233323011                                      |
| 414.6125                                         | 312.2819444                                     | 0.281123793                                      |
| 525.4341085                                      | 336.273703                                      | 0.267380402                                      |
| 149.1317365                                      | 95.24431138                                     | 0.224082947                                      |
| 180.8417541                                      | 91.96282173                                     | 0.325854671                                      |
| 189.192673                                       | 169.0922659                                     | 0.253604792                                      |
| 158.9601259                                      | 91.28331584                                     | 0.267149657                                      |
| 290.9330085                                      | 153.5627284                                     | 0.270387501                                      |
| 178.777561                                       | 91.23414634                                     | 0.283348872                                      |
| 338.9840256                                      | 171.4046858                                     | 0.286632486                                      |
| 298.9021544                                      | 274.6427289                                     | 0.257974679                                      |
| 756.5930614                                      | 353.7890295                                     | 0.309746829                                      |
| 101.9090909                                      | 53.42538593                                     | 0.287050965                                      |
| 24.67164179                                      | 17.53731343                                     | 0.363273873                                      |
| 93.08853119                                      | 48.14688129                                     | 0.288047996                                      |
| 489.5408879                                      | 388.2867991                                     | 0.242076691                                      |
| 148.2648126                                      | 76.73881499                                     | 0.286279067                                      |
| 534.625229                                       | 436.4053913                                     | 0.239196484                                      |
| 96.24534687                                      | 65.42978003                                     | 0.263069254                                      |
| 656.9745516                                      | 1226.761153                                     | 0.183558726                                      |
| 182.2036405                                      | 62.48805461                                     | 0.37222263                                       |
| 425.3903329                                      | 163.8964888                                     | 0.312208477                                      |
| 229.2072699                                      | 121.3665893                                     | 0.293986419                                      |
| 112.031941                                       | 92.22358722                                     | 0.290704795                                      |
| 121.9148695                                      | 109.0499432                                     | 0.241264752                                      |
| 357.3397829                                      | 202.3780085                                     | 0.267407485                                      |
| 768.8419131                                      | 579.7915298                                     | 0.256975176                                      |
| 348.0330097                                      | 495.5262136                                     | 0.203679019                                      |
| 232.7846943                                      | 498.9443427                                     | 0.149772947                                      |
| 37.15668203                                      | 23                                              | 0.281138508                                      |
| 246.8531874                                      | 150.7037991                                     | 0.282652703                                      |
| 87.91878173                                      | 31.57360406                                     | 0.379542158                                      |
| 491.7475759                                      | 324.5639662                                     | 0.248694787                                      |
| 83.69955157                                      | 40.9058296                                      | 0.299841092                                      |
| 337.6494281                                      | 194.1357534                                     | 0.287192851                                      |
| 445.8973684                                      | 333.5947368                                     | 0.249189293                                      |
| 196.5146147                                      | 117.9441984                                     | 0.233097963                                      |
| 592.1164861                                      | 732.7051084                                     | 0.202716728                                      |
| 726.5908279                                      | 1035.85944                                      | 0.185785285                                      |
| 1146.725054                                      | 1146.081264                                     | 0.24084211                                       |
| 244.1487455                                      | 81.79569892                                     | 0.360028882                                      |
| 188.7385855                                      | 107.2900627                                     | 0.277487257                                      |
| 112.4262295                                      | 53.61311475                                     | 0.292438917                                      |
| 276.0181406                                      | 168.8673469                                     | 0.260687327                                      |
| 434.1672523                                      | 288.6929023                                     | 0.262076951                                      |
| 96.84126984                                      | 40.76984127                                     | 0.368997353                                      |
| 325.945563                                       | 86.55406413                                     | 0.414814971                                      |
| 505.2901146                                      | 241.4412607                                     | 0.324293146                                      |
| 29.12413793                                      | 16.97241379                                     | 0.277061185                                      |
| 506.4762607                                      | 394.0881746                                     | 0.251291867                                      |
| 573.463477                                       | 801.4996348                                     | 0.182463713                                      |
| 140.9640103                                      | 75.04627249                                     | 0.271003877                                      |
| 312.7860825                                      | 133.9110825                                     | 0.287389603                                      |
| 32.14754098                                      | 21.76502732                                     | 0.275299374                                      |
| 24.2                                             | 12.37142857                                     | 0.428059443                                      |
| 537.9831447                                      | 456.7303145                                     | 0.251769913                                      |
| 133.8470255                                      | 54.07648725                                     | 0.359515245                                      |
| 141.0900196                                      | 110.1311155                                     | 0.306010179                                      |
| 528.9515892                                      | 472.8777506                                     | 0.233800916                                      |
| 721.3988977                                      | 763.1639683                                     | 0.222616313                                      |
| 65.07114625                                      | 15.71146245                                     | 0.443223939                                      |
| 179.4358553                                      | 129.5164474                                     | 0.263250851                                      |
| 26.88617886                                      | 11.34146341                                     | 0.354649955                                      |
| 60.13456464                                      | 44.66754617                                     | 0.253379273                                      |
| 104.9306072                                      | 87.46344486                                     | 0.293936885                                      |

| log.sigma.1.0.mm.3D_gldm_DependenceNonUniformityNormalized | log.sigma.1.0.mm.3D_gldm_DependenceVariance | log.sigma.1.0.mm.3D_gldm_LargeDependenceEmphasis |
|------------------------------------------------------------|---------------------------------------------|--------------------------------------------------|
| 0.182679421                                                | 4.300628366                                 | 13.94050992                                      |
| 0.101744141                                                | 13.65865224                                 | 40.3721714                                       |
| 0.186455435                                                | 5.37773153                                  | 14.96774194                                      |
| 0.194370627                                                | 4.734494417                                 | 13.64364326                                      |
| 0.158386418                                                | 3.871074868                                 | 16.05292479                                      |
| 0.165551253                                                | 3.315997862                                 | 13.87091757                                      |
| 0.15329007                                                 | 3.959407937                                 | 16.74480712                                      |
| 0.193060984                                                | 2.586368182                                 | 10.79041916                                      |
| 0.167800222                                                | 3.769116067                                 | 14.57768158                                      |
| 0.143712327                                                | 6.096567852                                 | 19.90961911                                      |
| 0.171027987                                                | 3.010493779                                 | 13.55139057                                      |
| 0.161658298                                                | 5.28927426                                  | 16.82726046                                      |
| 0.15927556                                                 | 3.713408142                                 | 16.10896818                                      |
| 0.134681789                                                | 5.569506626                                 | 21.29874776                                      |
| 0.179394183                                                | 3.167352073                                 | 12.82436883                                      |
| 0.079334248                                                | 13.17236485                                 | 52.87850871                                      |
| 0.161501137                                                | 3.275202995                                 | 15.11747851                                      |
| 0.124981612                                                | 6.440280503                                 | 25.03516295                                      |
| 0.180802069                                                | 2.66953626                                  | 12.88316151                                      |
| 0.094165762                                                | 11.04864522                                 | 40.35380221                                      |
| 0.116787814                                                | 9.845313859                                 | 29.84456355                                      |
| 0.163313953                                                | 3.5180841                                   | 14.61627907                                      |
| 0.117667809                                                | 8.956606954                                 | 28.94873673                                      |
| 0.188592719                                                | 3.162149195                                 | 11.88981289                                      |
| 0.129311487                                                | 8.359488306                                 | 25.13953488                                      |
| 0.145840427                                                | 7.031916219                                 | 20.95965418                                      |
| 0.102208279                                                | 12.52485791                                 | 37.9711483                                       |
| 0.136734601                                                | 7.465920684                                 | 22.62316818                                      |
| 0.186589733                                                | 2.946824066                                 | 12.32464589                                      |
| 0.09636966                                                 | 14.47007535                                 | 42.39103068                                      |
| 0.131150566                                                | 7.115716036                                 | 23.16860648                                      |
| 0.111132919                                                | 8.418013531                                 | 31.34806071                                      |
| 0.179935395                                                | 4.097254136                                 | 13.89326119                                      |
| 0.249815089                                                | 1.532544379                                 | 7.403846154                                      |
| 0.231165626                                                | 2.189432429                                 | 8.530120482                                      |
| 0.161434173                                                | 3.47139006                                  | 15.58316832                                      |
| 0.143962674                                                | 8.124442515                                 | 22.95763889                                      |
| 0.156658947                                                | 5.042997459                                 | 17.35778175                                      |
| 0.178600882                                                | 2.612751981                                 | 13.88143713                                      |
| 0.172394427                                                | 4.063853086                                 | 14.01429933                                      |
| 0.128353238                                                | 10.51311102                                 | 28.87381275                                      |
| 0.166799712                                                | 3.289844078                                 | 14.09758657                                      |
| 0.1771821                                                  | 2.920586433                                 | 12.93422655                                      |
| 0.174417133                                                | 2.841590482                                 | 12.72878049                                      |
| 0.180502676                                                | 3.100021435                                 | 12.76357827                                      |
| 0.134157161                                                | 6.779033131                                 | 22.06193896                                      |
| 0.17735421                                                 | 4.723263502                                 | 14.90154712                                      |
| 0.174801185                                                | 3.603305785                                 | 13.72727273                                      |
| 0.18411673                                                 | 3.371129427                                 | 12.10447761                                      |
| 0.187300868                                                | 2.426300256                                 | 11.52313883                                      |
| 0.14297339                                                 | 6.328161507                                 | 20.86331776                                      |
| 0.179280305                                                | 2.949779875                                 | 12.56952842                                      |
| 0.139917621                                                | 8.050452735                                 | 23.98979325                                      |
| 0.162851687                                                | 3.629536104                                 | 14.95600677                                      |
| 0.100716626                                                | 9.860800245                                 | 34.86080025                                      |
| 0.207285143                                                | 3.493951266                                 | 11.21843003                                      |
| 0.19397644                                                 | 2.617193662                                 | 11.04651163                                      |
| 0.177267803                                                | 2.924386114                                 | 12.48027842                                      |
| 0.137631377                                                | 9.77144444                                  | 25.71253071                                      |
| 0.138382372                                                | 4.999581272                                 | 19.415437                                        |
| 0.168636047                                                | 3.583881736                                 | 14.4374705                                       |
| 0.140350842                                                | 6.275923169                                 | 20.70427163                                      |
| 0.112632042                                                | 8.729005771                                 | 29.66925566                                      |
| 0.085237896                                                | 14.35322613                                 | 49.27608934                                      |
| 0.171228949                                                | 4.980483765                                 | 16.14285714                                      |
| 0.158952471                                                | 4.571580917                                 | 16.15260786                                      |
| 0.223144116                                                | 2.039037337                                 | 8.558375635                                      |
| 0.153815319                                                | 4.099040105                                 | 16.55020332                                      |
| 0.187667156                                                | 2.834080717                                 | 11.83408072                                      |
| 0.167901257                                                | 4.165439165                                 | 14.93336648                                      |
| 0.146676766                                                | 5.184347299                                 | 18.65131579                                      |
| 0.174060775                                                | 2.930690288                                 | 14.07528787                                      |
| 0.114573623                                                | 8.529572315                                 | 29.00309598                                      |
| 0.108188033                                                | 9.800081659                                 | 32.80464562                                      |
| 0.124915583                                                | 8.428678381                                 | 26.14379085                                      |
| 0.218771277                                                | 1.842785293                                 | 8.586021505                                      |
| 0.16896919                                                 | 3.481478157                                 | 14.03670546                                      |
| 0.184305294                                                | 3.271969901                                 | 12.7704918                                       |
| 0.156472869                                                | 4.611615016                                 | 16.80612245                                      |
| 0.152553497                                                | 5.950458016                                 | 19.02810963                                      |
| 0.192145377                                                | 3.1244898                                   | 11.28571429                                      |
| 0.243061568                                                | 1.73365008                                  | 7.381804623                                      |
| 0.180977835                                                | 3.728969795                                 | 13.06733524                                      |
| 0.200856124                                                | 2.036623068                                 | 10.62758621                                      |
| 0.149358968                                                | 4.698645546                                 | 17.68711295                                      |
| 0.10472306                                                 | 10.08811383                                 | 34.20489408                                      |
| 0.181187674                                                | 2.674962497                                 | 12.39845758                                      |
| 0.201537424                                                | 2.525487565                                 | 11.14304124                                      |
| 0.175669623                                                | 5.169816955                                 | 16.75956284                                      |
| 0.23047619                                                 | 2.249795918                                 | 8.428571429                                      |
| 0.135341672                                                | 8.807549955                                 | 25.2309434                                       |
| 0.189585022                                                | 3.567992681                                 | 12.18130312                                      |
| 0.138052857                                                | 10.187618                                   | 26.56555773                                      |
| 0.129328017                                                | 7.038184851                                 | 23.57066015                                      |
| 0.124250585                                                | 7.432848222                                 | 25.16672408                                      |
| 0.257198207                                                | 2.763111437                                 | 8.557312253                                      |
| 0.147562381                                                | 5.808774996                                 | 19.37006579                                      |
| 0.21858682                                                 | 1.827615837                                 | 8.723577236                                      |
| 0.158666397                                                | 3.40968108                                  | 15.4116095                                       |
| 0.130025536                                                | 9.267886784                                 | 26.16232962                                      |



| log.sigma.1.0.mm.3D_gldm_LargeDependenceLowGrayLevelEmphasis | log.sigma.1.0.mm.3D_gldm_SmallDependenceHighGrayLevelEmphasis | log.sigma.1.0.mm.3D_gldm_LargeDependenceHighGrayLevelEmphasis |
|--------------------------------------------------------------|---------------------------------------------------------------|---------------------------------------------------------------|
| 0.164536824                                                  | 44.80960304                                                   | 1507.508499                                                   |
| 0.276651072                                                  | 36.86799222                                                   | 6125.749639                                                   |
| 0.305803507                                                  | 45.25597264                                                   | 944.3640553                                                   |
| 0.048760254                                                  | 123.226037                                                    | 4159.396964                                                   |
| 0.264565591                                                  | 21.1908715                                                    | 1273.272981                                                   |
| 0.126875363                                                  | 43.33783681                                                   | 1747.306376                                                   |
| 0.108259904                                                  | 35.53050348                                                   | 2848.192878                                                   |
| 0.059682294                                                  | 75.68529758                                                   | 2311.818363                                                   |
| 0.091697905                                                  | 55.63486869                                                   | 2641.127946                                                   |
| 0.091387586                                                  | 72.67897291                                                   | 4573.016462                                                   |
| 0.153667232                                                  | 33.38635648                                                   | 1419.376058                                                   |
| 0.047764268                                                  | 122.9907069                                                   | 6269.238866                                                   |
| 0.164451649                                                  | 30.74211421                                                   | 1771.419479                                                   |
| 0.353721995                                                  | 18.79267138                                                   | 1499.527728                                                   |
| 0.093408334                                                  | 52.71255345                                                   | 2023.418222                                                   |
| 0.510793965                                                  | 18.89981852                                                   | 5621.18051                                                    |
| 0.404290596                                                  | 17.5327636                                                    | 847.3123209                                                   |
| 0.256139919                                                  | 24.87150112                                                   | 2680.419811                                                   |
| 0.182771695                                                  | 27.43163618                                                   | 1217.345361                                                   |
| 0.488444967                                                  | 16.52361161                                                   | 3515.77865                                                    |
| 0.210135299                                                  | 42.19664019                                                   | 4416.417305                                                   |
| 0.090193578                                                  | 58.22412356                                                   | 2599.062209                                                   |
| 0.301055479                                                  | 27.78284846                                                   | 2964.858294                                                   |
| 0.084224328                                                  | 57.34972658                                                   | 2015.126819                                                   |
| 0.453755105                                                  | 22.76909724                                                   | 1588.226744                                                   |
| 0.155117458                                                  | 52.27351445                                                   | 3102.572046                                                   |
| 0.145391807                                                  | 58.88685349                                                   | 10121.93566                                                   |
| 0.141945079                                                  | 57.90544542                                                   | 3804.904396                                                   |
| 0.11074007                                                   | 43.73314549                                                   | 1687.278187                                                   |
| 0.289492471                                                  | 39.13730804                                                   | 6404.697876                                                   |
| 0.249399139                                                  | 34.80513824                                                   | 2312.27776                                                    |
| 0.485407931                                                  | 15.32997724                                                   | 2180.375042                                                   |
| 0.087038592                                                  | 65.70135469                                                   | 2543.551894                                                   |
| 0.11774335                                                   | 53.99992679                                                   | 939.7692308                                                   |
| 0.087007877                                                  | 61.39982899                                                   | 1163.894578                                                   |
| 0.133186129                                                  | 33.97284718                                                   | 2075.557921                                                   |
| 0.167010473                                                  | 54.65313705                                                   | 3445.967014                                                   |
| 0.043890355                                                  | 121.0695823                                                   | 7138.863745                                                   |
| 0.223366371                                                  | 18.33370983                                                   | 1123.720958                                                   |
| 0.074787965                                                  | 74.57205686                                                   | 2897.471878                                                   |
| 0.199748602                                                  | 46.55101186                                                   | 4436.761872                                                   |
| 0.130582094                                                  | 39.7143896                                                    | 1821.736621                                                   |
| 0.095486074                                                  | 45.28134898                                                   | 2060.897077                                                   |
| 0.119598858                                                  | 44.84358268                                                   | 1695.06439                                                    |
| 0.056925022                                                  | 70.88908629                                                   | 3178.71885                                                    |
| 0.284565875                                                  | 29.85289596                                                   | 1897.836625                                                   |
| 0.037307827                                                  | 141.8270964                                                   | 6288.132208                                                   |
| 0.105592486                                                  | 50.59500385                                                   | 2065.181818                                                   |
| 0.147041944                                                  | 34.63078223                                                   | 1249.932836                                                   |
| 0.070878804                                                  | 58.56937612                                                   | 2260.947686                                                   |
| 0.123457275                                                  | 50.19879141                                                   | 3752.104556                                                   |
| 0.116695428                                                  | 40.79085801                                                   | 1647.049577                                                   |
| 0.065528289                                                  | 96.86853813                                                   | 9044.572363                                                   |
| 0.251905736                                                  | 24.24984494                                                   | 1121.062606                                                   |
| 0.280929066                                                  | 28.95710482                                                   | 4498.234708                                                   |
| 0.093705001                                                  | 66.80187354                                                   | 1799.817975                                                   |
| 0.065029648                                                  | 76.44471328                                                   | 2251.094847                                                   |
| 0.063407434                                                  | 66.34423665                                                   | 2835.566125                                                   |
| 0.179025369                                                  | 50.0466708                                                    | 3945.980344                                                   |
| 0.088874939                                                  | 63.16059051                                                   | 4470.792281                                                   |
| 0.06598874                                                   | 70.45720839                                                   | 3419.549788                                                   |
| 0.081095499                                                  | 79.57128415                                                   | 5551.114458                                                   |
| 0.148541368                                                  | 48.40385463                                                   | 6092.503883                                                   |
| 0.04211393                                                   | 177.8880745                                                   | 58359.06518                                                   |
| 0.407555504                                                  | 20.04429148                                                   | 915.5069124                                                   |
| 0.095429362                                                  | 62.2633808                                                    | 2999.627817                                                   |
| 0.073341296                                                  | 62.94662549                                                   | 1388.667513                                                   |
| 0.064986532                                                  | 73.04927663                                                   | 4490.736628                                                   |
| 0.091078946                                                  | 49.06892121                                                   | 1848.639013                                                   |
| 0.093407042                                                  | 62.70370275                                                   | 2663.027847                                                   |
| 0.138013535                                                  | 46.19748686                                                   | 2747.059868                                                   |
| 0.103203977                                                  | 40.14484912                                                   | 2174.519043                                                   |
| 0.202324872                                                  | 38.27221256                                                   | 4350.223491                                                   |
| 0.269625458                                                  | 27.68104171                                                   | 4170.237493                                                   |
| 0.112402264                                                  | 64.19951403                                                   | 6314.425926                                                   |
| 0.041430293                                                  | 92.54620739                                                   | 2175.769713                                                   |
| 0.12908664                                                   | 41.89921981                                                   | 1817.636526                                                   |
| 0.216230454                                                  | 32.06360221                                                   | 1033.204918                                                   |
| 0.110890839                                                  | 52.4915243                                                    | 2845.157596                                                   |
| 0.166807948                                                  | 41.91503598                                                   | 2415.764933                                                   |
| 0.06842477                                                   | 88.10728459                                                   | 2221.869048                                                   |
| 0.032582704                                                  | 124.933819                                                    | 2118.059657                                                   |
| 0.012854286                                                  | 363.0035672                                                   | 13956.67085                                                   |
| 0.119817182                                                  | 40.24120267                                                   | 1209.082759                                                   |
| 0.14917331                                                   | 38.74353383                                                   | 2284.751991                                                   |
| 0.130764254                                                  | 54.5357701                                                    | 9142.251644                                                   |
| 0.095090197                                                  | 48.31719456                                                   | 1851.579692                                                   |
| 0.061639076                                                  | 64.52891753                                                   | 2333.5                                                        |
| 0.117644519                                                  | 47.70310221                                                   | 2762.038251                                                   |
| 0.085783946                                                  | 78.51044709                                                   | 1510.304762                                                   |
| 0.043103599                                                  | 154.0993652                                                   | 15099.91547                                                   |
| 0.04657912                                                   | 122.6833738                                                   | 3558.791785                                                   |
| 0.136229122                                                  | 73.13015292                                                   | 5429.423679                                                   |
| 0.140492501                                                  | 48.2255992                                                    | 4245.282641                                                   |
| 0.112683112                                                  | 61.54608671                                                   | 5795.654323                                                   |
| 0.057404716                                                  | 108.4106732                                                   | 1744.158103                                                   |
| 0.067360446                                                  | 83.32270521                                                   | 6170.04523                                                    |
| 0.091059677                                                  | 54.26437218                                                   | 1276.138211                                                   |
| 0.182461186                                                  | 26.89764579                                                   | 1555.07124                                                    |
| 0.270549412                                                  | 43.74558707                                                   | 2815.77943                                                    |

| log.sigma.1.0.mm.3D_gldm_SmallDependenceLowGrayLevelEmphasis | log.sigma.1.0.mm.3D_gldm_LowGrayLevelEmphasis | log.sigma.1.0.mm.3D_gldm_DistanceZoneVariabilityNormalized |
|--------------------------------------------------------------|-----------------------------------------------|------------------------------------------------------------|
| 0.011347824                                                  | 0.020175897                                   | 0.931384649                                                |
| 0.002380428                                                  | 0.00817729                                    | 0.911888164                                                |
| 0.017231814                                                  | 0.032847648                                   | 0.927187728                                                |
| 0.001934506                                                  | 0.004308682                                   | 0.866407433                                                |
| 0.012472425                                                  | 0.026983151                                   | 0.844273427                                                |
| 0.004821621                                                  | 0.011342502                                   | 0.886134068                                                |
| 0.005673966                                                  | 0.1085063                                     | 0.648760331                                                |
| 0.003395492                                                  | 0.007081541                                   | 0.850986121                                                |
| 0.003026237                                                  | 0.007784657                                   | 0.931762492                                                |
| 0.001782662                                                  | 0.005262219                                   | 0.946469152                                                |
| 0.005044586                                                  | 0.013248449                                   | 0.903476013                                                |
| 0.001769637                                                  | 0.003770307                                   | 0.913732402                                                |
| 0.003665792                                                  | 0.011566403                                   | 0.917136834                                                |
| 0.006660981                                                  | 0.019497176                                   | 0.909297052                                                |
| 0.005389033                                                  | 0.010357397                                   | 0.853497923                                                |
| 0.001914666                                                  | 0.010594329                                   | 0.90714813                                                 |
| 0.018561578                                                  | 0.039067078                                   | 0.794878056                                                |
| 0.002879067                                                  | 0.011358828                                   | 0.9552807                                                  |
| 0.008107266                                                  | 0.018923951                                   | 0.832887952                                                |
| 0.00325467                                                   | 0.013746304                                   | 0.946706699                                                |
| 0.002306885                                                  | 0.007925522                                   | 0.898315701                                                |
| 0.002265397                                                  | 0.006741513                                   | 0.889273356                                                |
| 0.002817492                                                  | 0.01118543                                    | 0.958016099                                                |
| 0.00611141                                                   | 0.011079524                                   | 0.730899545                                                |
| 0.009572555                                                  | 0.02422577                                    | 0.922283363                                                |
| 0.004875902                                                  | 0.01056614                                    | 0.943176681                                                |
| 0.001235126                                                  | 0.004363049                                   | 0.877371027                                                |
| 0.002780051                                                  | 0.007463668                                   | 0.940286606                                                |
| 0.004588412                                                  | 0.011191353                                   | 0.926772907                                                |
| 0.002298294                                                  | 0.008109193                                   | 0.942326031                                                |
| 0.003716355                                                  | 0.012204537                                   | 0.958012334                                                |
| 0.003544602                                                  | 0.016656996                                   | 0.923508652                                                |
| 0.004178526                                                  | 0.008671351                                   | 0.948238056                                                |
| 0.015948438                                                  | 0.027014651                                   | 0.809868719                                                |
| 0.010670741                                                  | 0.01661676                                    | 0.8872                                                     |
| 0.003273818                                                  | 0.01001522                                    | 0.896927425                                                |
| 0.003133962                                                  | 0.009225423                                   | 0.967293671                                                |
| 0.001013796                                                  | 0.002856004                                   | 0.912966254                                                |
| 0.010140233                                                  | 0.02304225                                    | 0.79375918                                                 |
| 0.00317447                                                   | 0.006771191                                   | 0.926807656                                                |
| 0.003445876                                                  | 0.009084519                                   | 0.864670467                                                |
| 0.004408446                                                  | 0.011170645                                   | 0.917678344                                                |
| 0.003387641                                                  | 0.008945724                                   | 0.901838492                                                |
| 0.006135961                                                  | 0.012853272                                   | 0.844162048                                                |
| 0.002265731                                                  | 0.00556223                                    | 0.872277715                                                |
| 0.005538101                                                  | 0.015788939                                   | 0.971113752                                                |
| 0.001253528                                                  | 0.002995792                                   | 0.843361874                                                |
| 0.004810812                                                  | 0.010214904                                   | 0.955677876                                                |
| 0.025137724                                                  | 0.032727698                                   | 0.654320988                                                |
| 0.004080456                                                  | 0.008651232                                   | 0.838487422                                                |
| 0.002088493                                                  | 0.006734455                                   | 0.946883481                                                |
| 0.00507936                                                   | 0.011925723                                   | 0.956385346                                                |
| 0.000984739                                                  | 0.003095256                                   | 0.935805983                                                |
| 0.010138714                                                  | 0.023615621                                   | 0.866614077                                                |
| 0.002053295                                                  | 0.0089184                                     | 0.972913475                                                |
| 0.012641809                                                  | 0.017963152                                   | 0.811858385                                                |
| 0.002784905                                                  | 0.006729883                                   | 0.781980045                                                |
| 0.003351779                                                  | 0.007137625                                   | 0.711716765                                                |
| 0.006008191                                                  | 0.011051745                                   | 0.88408044                                                 |
| 0.002558674                                                  | 0.005922498                                   | 0.982144306                                                |
| 0.001956291                                                  | 0.005349374                                   | 0.909438323                                                |
| 0.001378115                                                  | 0.004346791                                   | 0.91734396                                                 |
| 0.001508848                                                  | 0.005474408                                   | 0.951471645                                                |
| 0.000504993                                                  | 0.001223944                                   | 0.952522185                                                |
| 0.018589907                                                  | 0.04091876                                    | 0.944489796                                                |
| 0.003051798                                                  | 0.007396959                                   | 0.888850635                                                |
| 0.007411582                                                  | 0.012526728                                   | 0.7888                                                     |
| 0.00145535                                                   | 0.004436051                                   | 0.949226208                                                |
| 0.005672816                                                  | 0.011140249                                   | 0.874780415                                                |
| 0.003501665                                                  | 0.008077294                                   | 0.911041023                                                |
| 0.002828733                                                  | 0.008411913                                   | 0.901328063                                                |
| 0.003061481                                                  | 0.008738931                                   | 0.9232                                                     |
| 0.002155015                                                  | 0.007882609                                   | 0.937229491                                                |
| 0.002334686                                                  | 0.009265234                                   | 0.957075894                                                |
| 0.001697946                                                  | 0.00508971                                    | 0.934232684                                                |
| 0.003835684                                                  | 0.006968801                                   | 0.824358633                                                |
| 0.005113223                                                  | 0.011860704                                   | 0.834710744                                                |
| 0.010650178                                                  | 0.022728891                                   | 0.889273356                                                |
| 0.00319186                                                   | 0.007991711                                   | 0.843842951                                                |
| 0.004108689                                                  | 0.010988666                                   | 0.883478898                                                |
| 0.004695093                                                  | 0.008583534                                   | 0.872742415                                                |
| 0.00408614                                                   | 0.006553177                                   | 0.82428426                                                 |
| 0.000684621                                                  | 0.001337359                                   | 0.880888554                                                |
| 0.012060228                                                  | 0.019478829                                   | 0.816743024                                                |
| 0.003299813                                                  | 0.009687443                                   | 0.957056154                                                |
| 0.0009794                                                    | 0.004124102                                   | 0.773808985                                                |
| 0.004051185                                                  | 0.009488408                                   | 0.964456092                                                |
| 0.002652293                                                  | 0.006562251                                   | 0.856953705                                                |
| 0.0074691                                                    | 0.012419273                                   | 0.905                                                      |
| 0.032562704                                                  | 0.036141425                                   | 0.893200427                                                |
| 0.000776368                                                  | 0.002050252                                   | 0.902272318                                                |
| 0.003202856                                                  | 0.005599457                                   | 0.939655895                                                |
| 0.003132546                                                  | 0.006795298                                   | 0.845550878                                                |
| 0.002358068                                                  | 0.007377315                                   | 0.924168975                                                |
| 0.001289149                                                  | 0.004771803                                   | 0.950215657                                                |
| 0.008407014                                                  | 0.012142742                                   | 0.806502013                                                |
| 0.00234294                                                   | 0.005310301                                   | 0.954310728                                                |
| 0.011723069                                                  | 0.017911688                                   | 0.857988166                                                |
| 0.012694565                                                  | 0.021591598                                   | 0.7738                                                     |
| 0.006829855                                                  | 0.015175059                                   | 0.93085824                                                 |

| log.sigma.1.0.mm.3D_gldzm_LowIntensityEmphasis | log.sigma.1.0.mm.3D_gldzm_LargeDistanceEmphasis | log.sigma.1.0.mm.3D_gldzm_HighIntensitySmallDistanceEmphasis |
|------------------------------------------------|-------------------------------------------------|--------------------------------------------------------------|
| 0.033606385                                    | 1.106719368                                     | 140.3498024                                                  |
| 0.011876681                                    | 1.138568129                                     | 185.8152425                                                  |
| 0.044247359                                    | 1.113513514                                     | 114.077027                                                   |
| 0.005371176                                    | 1.215930902                                     | 335.5403071                                                  |
| 0.052359967                                    | 1.255319149                                     | 84.93617021                                                  |
| 0.016281371                                    | 1.181818182                                     | 149.4356061                                                  |
| 0.022620825                                    | 1.681818182                                     | 133.1676136                                                  |
| 0.009838845                                    | 1.243243243                                     | 224.4135135                                                  |
| 0.010840373                                    | 1.106109325                                     | 198.8561093                                                  |
| 0.006670265                                    | 1.082568807                                     | 272.9747706                                                  |
| 0.018323821                                    | 1.152542373                                     | 125.8072034                                                  |
| 0.005676092                                    | 1.135523614                                     | 402.698152                                                   |
| 0.015734604                                    | 1.12992126                                      | 131.5684055                                                  |
| 0.030346211                                    | 1.142857143                                     | 87.49900794                                                  |
| 0.017650391                                    | 1.238754325                                     | 168.400519                                                   |
| 0.015251446                                    | 1.146424518                                     | 142.7988082                                                  |
| 0.075593455                                    | 1.348066298                                     | 70.68370166                                                  |
| 0.015621755                                    | 1.068649886                                     | 139.1618993                                                  |
| 0.031490044                                    | 1.27607362                                      | 109.9171779                                                  |
| 0.021319193                                    | 1.082191781                                     | 109.341895                                                   |
| 0.009946276                                    | 1.161186848                                     | 180.9851644                                                  |
| 0.008408944                                    | 1.176470588                                     | 213.3615619                                                  |
| 0.013321048                                    | 1.064356436                                     | 135.1212871                                                  |
| 0.017504438                                    | 1.480662983                                     | 157.8522099                                                  |
| 0.037793645                                    | 1.121495327                                     | 89.70327103                                                  |
| 0.017122386                                    | 1.087804878                                     | 189.7646341                                                  |
| 0.006205856                                    | 1.196861626                                     | 290.0356633                                                  |
| 0.009993525                                    | 1.092417062                                     | 210.6042654                                                  |
| 0.015429602                                    | 1.114186851                                     | 154.2045848                                                  |
| 0.010824867                                    | 1.089160839                                     | 182.3662587                                                  |
| 0.014965294                                    | 1.064362336                                     | 140.7240763                                                  |
| 0.022042967                                    | 1.119496855                                     | 94.04979036                                                  |
| 0.01323306                                     | 1.079763663                                     | 212.8408419                                                  |
| 0.040454954                                    | 1.319148936                                     | 134.9574468                                                  |
| 0.025309511                                    | 1.18                                            | 152.2666667                                                  |
| 0.014173585                                    | 1.163522013                                     | 143.3485325                                                  |
| 0.011459796                                    | 1.049889135                                     | 193.4506652                                                  |
| 0.003694649                                    | 1.136787565                                     | 443.1831606                                                  |
| 0.044114569                                    | 1.350253807                                     | 80.03680203                                                  |
| 0.00940744                                     | 1.114130435                                     | 230.2119565                                                  |
| 0.013392218                                    | 1.218978102                                     | 175.6922141                                                  |
| 0.016073552                                    | 1.129032258                                     | 150.5008961                                                  |
| 0.01238506                                     | 1.155279503                                     | 165.1718427                                                  |
| 0.020856479                                    | 1.255520505                                     | 155.1269716                                                  |
| 0.007680697                                    | 1.205685619                                     | 233.7077759                                                  |
| 0.02114005                                     | 1.043973941                                     | 117.6547231                                                  |
| 0.003912296                                    | 1.256968049                                     | 432.7826309                                                  |
| 0.015925767                                    | 1.066298343                                     | 181.4875691                                                  |
| 0.064344                                       | 1.666666667                                     | 90.63888889                                                  |
| 0.013718617                                    | 1.265822785                                     | 189.8243671                                                  |
| 0.008625499                                    | 1.081911263                                     | 205.4584755                                                  |
| 0.016993265                                    | 1.066914498                                     | 143.0213755                                                  |
| 0.004019426                                    | 1.099597586                                     | 399.9657948                                                  |
| 0.038054996                                    | 1.215568862                                     | 90.94011976                                                  |
| 0.011529435                                    | 1.041195477                                     | 159.0040388                                                  |
| 0.031248154                                    | 1.315363881                                     | 169.3665768                                                  |
| 0.008565381                                    | 1.373540856                                     | 230.4422827                                                  |
| 0.011137364                                    | 1.523923445                                     | 204.0849282                                                  |
| 0.019591009                                    | 1.185328185                                     | 172.6640927                                                  |
| 0.010291823                                    | 1.027027027                                     | 266.3085586                                                  |
| 0.007163545                                    | 1.142622951                                     | 262.3016393                                                  |
| 0.005291314                                    | 1.129581152                                     | 300.2501636                                                  |
| 0.007352144                                    | 1.074650078                                     | 240.3685848                                                  |
| 0.003357386                                    | 1.072992701                                     | 1180.539538                                                  |
| 0.063666448                                    | 1.085714286                                     | 74.51785714                                                  |
| 0.010336767                                    | 1.177189409                                     | 214.7316701                                                  |
| 0.018070074                                    | 1.36                                            | 159.1514286                                                  |
| 0.005801087                                    | 1.078199052                                     | 292.2959123                                                  |
| 0.017987992                                    | 1.201342282                                     | 163.2583893                                                  |
| 0.01173315                                     | 1.139968896                                     | 214.5307154                                                  |
| 0.011167272                                    | 1.156133829                                     | 184.3550186                                                  |
| 0.012792775                                    | 1.12                                            | 176.0209091                                                  |
| 0.010571589                                    | 1.097312326                                     | 190.8294717                                                  |
| 0.012604272                                    | 1.065830721                                     | 151.9198668                                                  |
| 0.007016525                                    | 1.10212766                                      | 261.4558511                                                  |
| 0.010307468                                    | 1.291855204                                     | 243.5820136                                                  |
| 0.018086833                                    | 1.272727273                                     | 145.5386364                                                  |
| 0.034418231                                    | 1.176470588                                     | 109.7585784                                                  |
| 0.011946814                                    | 1.256097561                                     | 194.1996951                                                  |
| 0.015359954                                    | 1.1863581                                       | 154.5130938                                                  |
| 0.0122416                                      | 1.204878049                                     | 232.4621951                                                  |
| 0.009156853                                    | 1.291993721                                     | 283.8316327                                                  |
| 0.001985408                                    | 1.190802348                                     | 1065.553327                                                  |
| 0.037899375                                    | 1.306122449                                     | 140.1122449                                                  |
| 0.012954737                                    | 1.06586169                                      | 154.5403403                                                  |
| 0.005442025                                    | 1.394523327                                     | 266.0821783                                                  |
| 0.014606928                                    | 1.054298643                                     | 180.2047511                                                  |
| 0.008868806                                    | 1.232604374                                     | 221.4428429                                                  |
| 0.023858054                                    | 1.15                                            | 169.45                                                       |
| 0.065571475                                    | 1.169811321                                     | 180.3254717                                                  |
| 0.002979951                                    | 1.154553818                                     | 596.1711132                                                  |
| 0.0083036                                      | 1.093425606                                     | 337.4982699                                                  |
| 0.01001655                                     | 1.253012048                                     | 223.1114458                                                  |
| 0.010475669                                    | 1.118421053                                     | 205.5450405                                                  |
| 0.005731917                                    | 1.07663411                                      | 279.0155898                                                  |
| 0.017432494                                    | 1.325581395                                     | 235.0096899                                                  |
| 0.009075745                                    | 1.070175439                                     | 310.6717836                                                  |
| 0.02962621                                     | 1.230769231                                     | 147.3365385                                                  |
| 0.049170183                                    | 1.39                                            | 101.605                                                      |
| 0.02307652                                     | 1.107569721                                     | 148.6085657                                                  |

| log.sigma.1.0.mm.3D_gldzm_LowIntensityLargeDistanceEmphasis | log.sigma.1.0.mm.3D_gldzm_HighIntensityEmphasis | log.sigma.1.0.mm.3D_gldzm_DistanceZoneVariability | log.sigma.1.0.mm.3D_gldzm_ZonePercentage |
|-------------------------------------------------------------|-------------------------------------------------|---------------------------------------------------|------------------------------------------|
| 0.040452409                                                 | 143.3833992                                     | 235.6403162                                       | 0.358356941                              |
| 0.015329686                                                 | 189.7228637                                     | 394.8475751                                       | 0.20847376                               |
| 0.068170782                                                 | 114.8432432                                     | 171.5297297                                       | 0.426267281                              |
| 0.006784619                                                 | 354.1564299                                     | 902.7965451                                       | 0.39544592                               |
| 0.081952165                                                 | 85.79787234                                     | 79.36170213                                       | 0.26183844                               |
| 0.020501635                                                 | 152.9090909                                     | 175.4545455                                       | 0.307931571                              |
| 0.073616997                                                 | 146.3181818                                     | 57.09090909                                       | 0.261127596                              |
| 0.013503009                                                 | 232.0351351                                     | 314.8648649                                       | 0.369261477                              |
| 0.011825688                                                 | 204.1061093                                     | 579.5562701                                       | 0.299182299                              |
| 0.007247034                                                 | 277.440367                                      | 825.3211009                                       | 0.281471917                              |
| 0.021590051                                                 | 129.1567797                                     | 213.220339                                        | 0.285368803                              |
| 0.006190664                                                 | 414.2731006                                     | 444.9876797                                       | 0.328609987                              |
| 0.02078112                                                  | 135.3996063                                     | 465.9055118                                       | 0.244937319                              |
| 0.041656636                                                 | 89.91269841                                     | 229.1428571                                       | 0.225402504                              |
| 0.034687635                                                 | 179.3391003                                     | 246.6608997                                       | 0.317233809                              |
| 0.017217295                                                 | 148.3348468                                     | 799.1975028                                       | 0.126817331                              |
| 0.14151502                                                  | 72.83425414                                     | 143.8729282                                       | 0.259312321                              |
| 0.018085406                                                 | 139.6956522                                     | 417.4576659                                       | 0.187392796                              |
| 0.052747988                                                 | 112.208589                                      | 135.7607362                                       | 0.280068729                              |
| 0.023019355                                                 | 111.5045662                                     | 414.6575342                                       | 0.156372724                              |
| 0.011627922                                                 | 187.9318364                                     | 1120.199679                                       | 0.238705972                              |
| 0.010272725                                                 | 220.5679513                                     | 438.4117647                                       | 0.286627907                              |
| 0.014550815                                                 | 136.529703                                      | 580.5577558                                       | 0.221896741                              |
| 0.026537766                                                 | 173.6685083                                     | 132.2928177                                       | 0.376299376                              |
| 0.041007359                                                 | 92.75700935                                     | 296.0529595                                       | 0.266611296                              |
| 0.018942034                                                 | 190.9170732                                     | 193.3512195                                       | 0.295389049                              |
| 0.007096122                                                 | 304.7617689                                     | 615.0370899                                       | 0.202250433                              |
| 0.010788879                                                 | 215.8649289                                     | 396.8009479                                       | 0.29448709                               |
| 0.023950123                                                 | 157.532872                                      | 535.6747405                                       | 0.327478754                              |
| 0.012280411                                                 | 185.5                                           | 539.0104895                                       | 0.22501967                               |
| 0.015957549                                                 | 143.2252682                                     | 803.772348                                        | 0.263919472                              |
| 0.029671973                                                 | 96.5639413                                      | 881.0272537                                       | 0.160876897                              |
| 0.0142369                                                   | 217.6366322                                     | 641.957164                                        | 0.333005411                              |
| 0.116491203                                                 | 137.3829787                                     | 38.06382979                                       | 0.451923077                              |
| 0.035989426                                                 | 156.7666667                                     | 133.08                                            | 0.451807229                              |
| 0.017553703                                                 | 149.21174                                       | 427.8343816                                       | 0.236138614                              |
| 0.012338755                                                 | 195.2749446                                     | 872.4988914                                       | 0.313194444                              |
| 0.004050929                                                 | 459.8455959                                     | 881.0124352                                       | 0.28771616                               |
| 0.115655455                                                 | 84.0304585                                      | 156.3705584                                       | 0.235928144                              |
| 0.010781113                                                 | 234.2554348                                     | 341.0652174                                       | 0.350810296                              |
| 0.017594882                                                 | 185.323601                                      | 355.379562                                        | 0.278833107                              |
| 0.021505062                                                 | 151.4229391                                     | 256.0322581                                       | 0.292759706                              |
| 0.015772514                                                 | 169.3519669                                     | 435.5879917                                       | 0.294153471                              |
| 0.029615664                                                 | 159.9747634                                     | 267.5993691                                       | 0.309268293                              |
| 0.009184795                                                 | 247.9816054                                     | 521.6220736                                       | 0.318423855                              |
| 0.022581038                                                 | 118.2752443                                     | 596.2638436                                       | 0.275583483                              |
| 0.0047688                                                   | 459.874915                                      | 1240.585316                                       | 0.344819503                              |
| 0.017135766                                                 | 182.9337017                                     | 173.1767956                                       | 0.310463122                              |
| 0.228290287                                                 | 93.88888889                                     | 35.33333333                                       | 0.402985075                              |
| 0.016868992                                                 | 200.2531646                                     | 132.4810127                                       | 0.317907445                              |
| 0.009559537                                                 | 208.7042093                                     | 832.3105802                                       | 0.25671729                               |
| 0.029725607                                                 | 144.267658                                      | 257.267658                                        | 0.325272068                              |
| 0.004440954                                                 | 407.6619718                                     | 930.1911469                                       | 0.260141324                              |
| 0.053658148                                                 | 93.83233533                                     | 144.7245509                                       | 0.282571912                              |
| 0.012635231                                                 | 159.8521809                                     | 1204.466882                                       | 0.189789974                              |
| 0.048855712                                                 | 179.3530997                                     | 301.1994609                                       | 0.422070535                              |
| 0.013821564                                                 | 247.5590143                                     | 602.9066148                                       | 0.351573187                              |
| 0.028643895                                                 | 225.3755981                                     | 297.4976077                                       | 0.323279196                              |
| 0.025654829                                                 | 175.5482625                                     | 228.976834                                        | 0.318181818                              |
| 0.010515187                                                 | 267.1261261                                     | 218.036036                                        | 0.251986379                              |
| 0.008364139                                                 | 268.1590164                                     | 554.757377                                        | 0.287871638                              |
| 0.005880396                                                 | 311.7028796                                     | 1401.701571                                       | 0.278933917                              |
| 0.007856876                                                 | 244.6749611                                     | 611.7962675                                       | 0.208090615                              |
| 0.003440656                                                 | 1196.6691                                       | 391.486618                                        | 0.150494324                              |
| 0.109202162                                                 | 74.7                                            | 66.11428571                                       | 0.322580645                              |
| 0.013222006                                                 | 222.9633401                                     | 436.4256619                                       | 0.316162267                              |
| 0.048262072                                                 | 166.9085714                                     | 138.04                                            | 0.444162437                              |
| 0.006399156                                                 | 295.8957346                                     | 801.1469194                                       | 0.263997498                              |
| 0.022188618                                                 | 165.9261745                                     | 130.3422819                                       | 0.334080717                              |
| 0.01425681                                                  | 219.6360809                                     | 585.7993779                                       | 0.319741422                              |
| 0.013605272                                                 | 189.7100372                                     | 727.3717472                                       | 0.265460526                              |
| 0.015295957                                                 | 178.4945455                                     | 253.88                                            | 0.243578388                              |
| 0.012003562                                                 | 194.0296571                                     | 1011.270621                                       | 0.20878483                               |
| 0.014148006                                                 | 153.3487461                                     | 1221.22884                                        | 0.189994044                              |
| 0.007626224                                                 | 269.7489362                                     | 2195.446809                                       | 0.255991285                              |
| 0.021859896                                                 | 256.6561086                                     | 364.3665158                                       | 0.396057348                              |
| 0.042046854                                                 | 152.5727273                                     | 275.4545455                                       | 0.295434199                              |
| 0.059637736                                                 | 112.0784314                                     | 181.4117647                                       | 0.33442623                               |
| 0.015848056                                                 | 203.2560976                                     | 415.1707317                                       | 0.278911565                              |
| 0.020453198                                                 | 160.5030451                                     | 725.3361754                                       | 0.288475053                              |
| 0.014762877                                                 | 238.7804878                                     | 178.9121951                                       | 0.406746032                              |
| 0.011832319                                                 | 303.2574568                                     | 525.0690738                                       | 0.475018643                              |
| 0.002209963                                                 | 1117.089041                                     | 900.2681018                                       | 0.366045845                              |
| 0.122406178                                                 | 141.3673469                                     | 40.02040816                                       | 0.337931034                              |
| 0.013718593                                                 | 157.053787                                      | 871.8781559                                       | 0.268652315                              |
| 0.007057556                                                 | 302.6713996                                     | 762.9756592                                       | 0.180058437                              |
| 0.016279405                                                 | 182.8687783                                     | 213.1447964                                       | 0.284061697                              |
| 0.01250305                                                  | 227.1908549                                     | 431.0477137                                       | 0.324097938                              |
| 0.025942256                                                 | 174.35                                          | 54.3                                              | 0.327868852                              |
| 0.071016472                                                 | 183.4528302                                     | 47.33962264                                       | 0.504761905                              |
| 0.003330429                                                 | 616.3597056                                     | 980.7700092                                       | 0.273459119                              |
| 0.008876375                                                 | 341.9515571                                     | 271.5605536                                       | 0.409348442                              |
| 0.011928819                                                 | 238.6716867                                     | 280.7228916                                       | 0.324853229                              |
| 0.011875919                                                 | 210.9423077                                     | 913.0789474                                       | 0.241564792                              |
| 0.006199536                                                 | 283.4800902                                     | 1264.73704                                        | 0.229245608                              |
| 0.02314065                                                  | 243.5503876                                     | 104.0387597                                       | 0.509881423                              |
| 0.009319228                                                 | 317.0994152                                     | 326.374269                                        | 0.28125                                  |
| 0.094834543                                                 | 148.4615385                                     | 44.61538462                                       | 0.422764228                              |
| 0.062135256                                                 | 108.13                                          | 77.38                                             | 0.263852243                              |
| 0.026132324                                                 | 150.2191235                                     | 233.6454183                                       | 0.311028501                              |

| log.sigma.1.0.mm.3D_gldzm_IntensityVariabilityNormalized | log.sigma.1.0.mm.3D_gldzm_LowIntensitySmallDistanceEmphasis | log.sigma.1.0.mm.3D_gldzm_IntensityVariability |
|----------------------------------------------------------|-------------------------------------------------------------|------------------------------------------------|
| 0.06069459                                               | 0.031894879                                                 | 15.35573123                                    |
| 0.067315949                                              | 0.011013429                                                 | 29.147806                                      |
| 0.06477721                                               | 0.038266503                                                 | 11.98378378                                    |
| 0.053201248                                              | 0.005017816                                                 | 55.43570058                                    |
| 0.081484835                                              | 0.044961917                                                 | 7.659574468                                    |
| 0.078512397                                              | 0.015226304                                                 | 15.54545455                                    |
| 0.090909091                                              | 0.009871783                                                 | 8                                              |
| 0.061636231                                              | 0.008922804                                                 | 22.80540541                                    |
| 0.062613083                                              | 0.010594044                                                 | 38.94533762                                    |
| 0.067794693                                              | 0.006526072                                                 | 59.11697248                                    |
| 0.084314852                                              | 0.017507264                                                 | 19.89830508                                    |
| 0.059480792                                              | 0.005547449                                                 | 28.96714579                                    |
| 0.078949408                                              | 0.014472975                                                 | 40.10629921                                    |
| 0.087899975                                              | 0.027518604                                                 | 22.15079365                                    |
| 0.069359802                                              | 0.01339108                                                  | 20.0449827                                     |
| 0.076799788                                              | 0.014759984                                                 | 67.66061294                                    |
| 0.078782699                                              | 0.059113064                                                 | 14.25966851                                    |
| 0.075881426                                              | 0.015005842                                                 | 33.16018307                                    |
| 0.072151756                                              | 0.026175558                                                 | 11.7607362                                     |
| 0.088446863                                              | 0.020894153                                                 | 38.73972603                                    |
| 0.072819514                                              | 0.009525865                                                 | 90.80593424                                    |
| 0.075379862                                              | 0.007942999                                                 | 37.16227181                                    |
| 0.087638467                                              | 0.013013606                                                 | 53.10891089                                    |
| 0.066084674                                              | 0.015246105                                                 | 11.96132597                                    |
| 0.078871517                                              | 0.036990217                                                 | 25.31775701                                    |
| 0.069839381                                              | 0.016667475                                                 | 14.31707317                                    |
| 0.07257006                                               | 0.00598329                                                  | 50.87161198                                    |
| 0.069124683                                              | 0.009794687                                                 | 29.17061611                                    |
| 0.067066965                                              | 0.013299472                                                 | 38.76470588                                    |
| 0.067142648                                              | 0.01046098                                                  | 38.40559441                                    |
| 0.073245435                                              | 0.01471723                                                  | 61.45292014                                    |
| 0.091522399                                              | 0.020135716                                                 | 87.31236897                                    |
| 0.058427461                                              | 0.0129821                                                   | 39.55539143                                    |
| 0.065640561                                              | 0.021445891                                                 | 3.085106383                                    |
| 0.0624                                                   | 0.022639532                                                 | 9.36                                           |
| 0.074526764                                              | 0.013328555                                                 | 35.54926625                                    |
| 0.059697347                                              | 0.011240056                                                 | 53.84700665                                    |
| 0.065216247                                              | 0.003605579                                                 | 62.93367876                                    |
| 0.080986369                                              | 0.026229347                                                 | 15.95431472                                    |
| 0.063327032                                              | 0.009064022                                                 | 23.30434783                                    |
| 0.062544029                                              | 0.012341552                                                 | 25.70559611                                    |
| 0.075936846                                              | 0.014715675                                                 | 21.18637993                                    |
| 0.069677524                                              | 0.011538196                                                 | 33.65424431                                    |
| 0.064673745                                              | 0.018666683                                                 | 20.50157729                                    |
| 0.065150278                                              | 0.007304673                                                 | 38.95986622                                    |
| 0.074610871                                              | 0.020779804                                                 | 45.81107492                                    |
| 0.055075673                                              | 0.00369817                                                  | 81.01631543                                    |
| 0.069137084                                              | 0.015623268                                                 | 12.51381215                                    |
| 0.0781893                                                | 0.023357429                                                 | 4.222222222                                    |
| 0.07867329                                               | 0.012931023                                                 | 12.43037975                                    |
| 0.067277041                                              | 0.00839199                                                  | 59.13651877                                    |
| 0.073921035                                              | 0.013810179                                                 | 19.88475836                                    |
| 0.067485395                                              | 0.003914045                                                 | 67.0804829                                     |
| 0.075190935                                              | 0.034154209                                                 | 12.55688623                                    |
| 0.074959351                                              | 0.011252985                                                 | 92.7996769                                     |
| 0.052491627                                              | 0.026846265                                                 | 19.47439353                                    |
| 0.058466694                                              | 0.007251335                                                 | 45.07782101                                    |
| 0.0596827                                                | 0.006760731                                                 | 24.94736842                                    |
| 0.062357448                                              | 0.018075054                                                 | 16.15057915                                    |
| 0.081852122                                              | 0.010235982                                                 | 18.17117117                                    |
| 0.066358506                                              | 0.006863397                                                 | 40.47868852                                    |
| 0.061692216                                              | 0.005144044                                                 | 94.26570681                                    |
| 0.081840807                                              | 0.007225961                                                 | 52.62363919                                    |
| 0.083476892                                              | 0.003336569                                                 | 34.30900243                                    |
| 0.088979592                                              | 0.05228252                                                  | 6.228571429                                    |
| 0.05973511                                               | 0.009615457                                                 | 29.3299389                                     |
| 0.072653061                                              | 0.010522074                                                 | 12.71428571                                    |
| 0.066089598                                              | 0.00565157                                                  | 55.77962085                                    |
| 0.071213008                                              | 0.016937835                                                 | 10.61073826                                    |
| 0.059709904                                              | 0.011102235                                                 | 38.39346812                                    |
| 0.069799723                                              | 0.010557773                                                 | 56.3283767                                     |
| 0.074618182                                              | 0.01216698                                                  | 20.52                                          |
| 0.074590227                                              | 0.010213596                                                 | 80.48285449                                    |
| 0.076902006                                              | 0.012218338                                                 | 98.12695925                                    |
| 0.062593753                                              | 0.0068641                                                   | 147.0953191                                    |
| 0.05597756                                               | 0.007419361                                                 | 24.74208145                                    |
| 0.069311295                                              | 0.012096828                                                 | 22.87272727                                    |
| 0.071703191                                              | 0.028113355                                                 | 14.62745098                                    |
| 0.069799722                                              | 0.010971503                                                 | 34.34146341                                    |
| 0.063056995                                              | 0.014086643                                                 | 51.76979294                                    |
| 0.061415824                                              | 0.011611281                                                 | 12.5902439                                     |
| 0.052712257                                              | 0.008487987                                                 | 33.57770801                                    |
| 0.053009907                                              | 0.00192927                                                  | 54.17612524                                    |
| 0.076218242                                              | 0.016772674                                                 | 3.734693878                                    |
| 0.075413202                                              | 0.012763773                                                 | 68.701427                                      |
| 0.074499381                                              | 0.00504047                                                  | 73.45638945                                    |
| 0.073360496                                              | 0.014188809                                                 | 16.21266968                                    |
| 0.068009438                                              | 0.007960245                                                 | 34.20874751                                    |
| 0.094444444                                              | 0.023337004                                                 | 5.666666667                                    |
| 0.077251691                                              | 0.064210226                                                 | 4.094339623                                    |
| 0.064190073                                              | 0.002892332                                                 | 69.77460902                                    |
| 0.052813065                                              | 0.008160407                                                 | 15.26297578                                    |
| 0.060005081                                              | 0.009538483                                                 | 19.92168675                                    |
| 0.065475995                                              | 0.010125607                                                 | 64.6902834                                     |
| 0.074806908                                              | 0.005615012                                                 | 99.56799399                                    |
| 0.050898384                                              | 0.016005455                                                 | 6.565891473                                    |
| 0.06730276                                               | 0.009014874                                                 | 23.01754386                                    |
| 0.082100592                                              | 0.013324127                                                 | 4.269230769                                    |
| 0.0792                                                   | 0.045928915                                                 | 7.92                                           |
| 0.060618085                                              | 0.022312569                                                 | 15.21513944                                    |

| log.sigma.1.0.mm.3D_gldzm_HighIntensityLargeDistanceEmphasis | log.sigma.1.0.mm.3D_gldzm_SmallDistanceEmphasis | log.sigma.1.0.mm.3D_gldzm_SumVariance | log.sigma.1.0.mm.3D_gldzm_Homogeneity1 |
|--------------------------------------------------------------|-------------------------------------------------|---------------------------------------|----------------------------------------|
| 150.5177866                                                  | 0.973320158                                     | 290.168337                            | 0.341877762                            |
| 205.3533487                                                  | 0.965357968                                     | 449.4088268                           | 0.467028423                            |
| 117.9081081                                                  | 0.971621622                                     | 178.4208927                           | 0.35718023                             |
| 428.6209213                                                  | 0.946017274                                     | 990.7992955                           | 0.311437788                            |
| 89.24468085                                                  | 0.936170213                                     | 180.010136                            | 0.394634748                            |
| 166.8030303                                                  | 0.954545455                                     | 351.957907                            | 0.375841755                            |
| 198.9204545                                                  | 0.829545455                                     | 446.7756453                           | 0.396417696                            |
| 262.5216216                                                  | 0.939189189                                     | 611.122828                            | 0.328491004                            |
| 225.1061093                                                  | 0.973472669                                     | 517.5445143                           | 0.365039802                            |
| 295.3027523                                                  | 0.979357798                                     | 727.250769                            | 0.392513576                            |
| 142.5550847                                                  | 0.961864407                                     | 285.2725633                           | 0.380147857                            |
| 460.5728953                                                  | 0.966119097                                     | 1211.633271                           | 0.347799237                            |
| 150.7244094                                                  | 0.967519685                                     | 307.7243204                           | 0.398723606                            |
| 99.56746032                                                  | 0.964285714                                     | 185.7698196                           | 0.420738673                            |
| 223.0934256                                                  | 0.940311419                                     | 464.1144895                           | 0.359937447                            |
| 170.4790011                                                  | 0.963393871                                     | 319.5176002                           | 0.55241215                             |
| 81.43646409                                                  | 0.912983425                                     | 126.5165859                           | 0.384011975                            |
| 141.8306636                                                  | 0.982837529                                     | 298.6858054                           | 0.437028641                            |
| 121.3742331                                                  | 0.930981595                                     | 236.8784212                           | 0.364003753                            |
| 120.1552511                                                  | 0.979452055                                     | 242.2663172                           | 0.504386088                            |
| 215.7185245                                                  | 0.959703288                                     | 443.256432                            | 0.436889004                            |
| 249.3935091                                                  | 0.955882353                                     | 543.8139392                           | 0.37799288                             |
| 142.1633663                                                  | 0.983910891                                     | 295.1442642                           | 0.453496594                            |
| 236.9337017                                                  | 0.879834254                                     | 455.0726192                           | 0.341800794                            |
| 104.9719626                                                  | 0.969626168                                     | 167.7919766                           | 0.434452133                            |
| 195.5268293                                                  | 0.97804878                                      | 425.7356973                           | 0.396103043                            |
| 363.6661912                                                  | 0.950784593                                     | 859.3007024                           | 0.461160211                            |
| 236.9075829                                                  | 0.976895735                                     | 516.5080365                           | 0.42000818                             |
| 170.8460208                                                  | 0.971453287                                     | 381.918387                            | 0.359674139                            |
| 198.034965                                                   | 0.97770979                                      | 437.3666105                           | 0.477554925                            |
| 153.2300358                                                  | 0.983909416                                     | 286.7602325                           | 0.424381469                            |
| 106.6205451                                                  | 0.970125786                                     | 189.1708868                           | 0.48437251                             |
| 236.8197932                                                  | 0.980059084                                     | 543.3217771                           | 0.344915312                            |
| 147.0851064                                                  | 0.920212766                                     | 301.5988786                           | 0.312497868                            |
| 174.7666667                                                  | 0.955                                           | 365.013348                            | 0.315186332                            |
| 172.6645702                                                  | 0.959119497                                     | 366.2373301                           | 0.386350407                            |
| 202.5720621                                                  | 0.987527716                                     | 441.0686655                           | 0.388357617                            |
| 526.4953368                                                  | 0.965803109                                     | 1376.971758                           | 0.36239783                             |
| 100.0050761                                                  | 0.912436548                                     | 188.313916                            | 0.38516793                             |
| 250.4293478                                                  | 0.971467391                                     | 615.7850352                           | 0.353788524                            |
| 223.8491484                                                  | 0.945255474                                     | 448.3860385                           | 0.413371254                            |
| 155.1111111                                                  | 0.967741935                                     | 355.6119947                           | 0.372764756                            |
| 186.0724638                                                  | 0.961180124                                     | 436.1586582                           | 0.358581467                            |
| 179.3659306                                                  | 0.936119874                                     | 362.1012686                           | 0.355264087                            |
| 305.0769231                                                  | 0.948578595                                     | 723.495111                            | 0.350312202                            |
| 120.757329                                                   | 0.989006515                                     | 232.1173591                           | 0.423148506                            |
| 568.2440517                                                  | 0.935757988                                     | 1361.468662                           | 0.334171722                            |
| 188.718232                                                   | 0.983425414                                     | 428.7171635                           | 0.358805867                            |
| 106.8888889                                                  | 0.833333333                                     | 224.3572728                           | 0.368860857                            |
| 241.9683544                                                  | 0.933544304                                     | 535.2187152                           | 0.346663739                            |
| 221.6871445                                                  | 0.979522184                                     | 532.687017                            | 0.401817095                            |
| 149.2527881                                                  | 0.983271375                                     | 343.2929555                           | 0.354525695                            |
| 438.4466801                                                  | 0.975100604                                     | 1217.31315                            | 0.387471953                            |
| 105.4011976                                                  | 0.946107784                                     | 182.8345069                           | 0.384291722                            |
| 163.2447496                                                  | 0.989701131                                     | 380.0465465                           | 0.486687602                            |
| 219.2991914                                                  | 0.92115903                                      | 432.6087723                           | 0.310222604                            |
| 316.0259403                                                  | 0.906614786                                     | 616.0280749                           | 0.325053826                            |
| 310.5382775                                                  | 0.869019139                                     | 633.592747                            | 0.341434624                            |
| 187.0849421                                                  | 0.953667954                                     | 434.8688721                           | 0.404172221                            |
| 270.3963964                                                  | 0.993243243                                     | 736.0018852                           | 0.418827009                            |
| 291.5885246                                                  | 0.964344262                                     | 712.04033                             | 0.365685618                            |
| 357.5137435                                                  | 0.967604712                                     | 861.8799872                           | 0.384778804                            |
| 261.9004666                                                  | 0.981337481                                     | 655.6818756                           | 0.463924733                            |
| 1261.187348                                                  | 0.981751825                                     | 4255.077386                           | 0.514150771                            |
| 75.42857143                                                  | 0.978571429                                     | 123.7032723                           | 0.386539419                            |
| 255.8900204                                                  | 0.955702648                                     | 558.4356963                           | 0.373296237                            |
| 197.9371429                                                  | 0.91                                            | 421.8761352                           | 0.307708002                            |
| 310.2950237                                                  | 0.980450237                                     | 838.8802299                           | 0.380194782                            |
| 176.5973154                                                  | 0.94966443                                      | 420.038021                            | 0.349378935                            |
| 240.0575428                                                  | 0.965007776                                     | 535.5676536                           | 0.35995758                             |
| 211.1301115                                                  | 0.960966543                                     | 441.9667745                           | 0.398163005                            |
| 188.3890909                                                  | 0.97                                            | 428.7507136                           | 0.382996942                            |
| 206.8303985                                                  | 0.975671918                                     | 447.9158094                           | 0.449707103                            |
| 159.0642633                                                  | 0.98354232                                      | 366.6857838                           | 0.467570472                            |
| 302.9212766                                                  | 0.974468085                                     | 764.8463519                           | 0.41779899                             |
| 308.9524887                                                  | 0.927036199                                     | 720.8940621                           | 0.298076249                            |
| 180.7090909                                                  | 0.931818182                                     | 352.0125837                           | 0.36581295                             |
| 121.3578431                                                  | 0.955882353                                     | 214.2536675                           | 0.35403432                             |
| 239.4817073                                                  | 0.93597561                                      | 504.7481169                           | 0.377308263                            |
| 184.4628502                                                  | 0.953410475                                     | 359.4177939                           | 0.382103533                            |
| 264.0536585                                                  | 0.948780488                                     | 572.5524329                           | 0.335089649                            |
| 380.9607535                                                  | 0.92700157                                      | 849.2989695                           | 0.280218034                            |
| 1323.231898                                                  | 0.952299413                                     | 3729.303855                           | 0.325260941                            |
| 146.3877551                                                  | 0.923469388                                     | 308.0739437                           | 0.374475344                            |
| 167.1075741                                                  | 0.983534577                                     | 374.1102652                           | 0.401541146                            |
| 451.2099391                                                  | 0.902496056                                     | 875.2861337                           | 0.451559465                            |
| 193.5248869                                                  | 0.986425339                                     | 427.7556916                           | 0.370482518                            |
| 250.1829026                                                  | 0.941848907                                     | 605.6695582                           | 0.340027704                            |
| 193.95                                                       | 0.9625                                          | 470.5521339                           | 0.394995956                            |
| 195.9622642                                                  | 0.95754717                                      | 494.1520493                           | 0.321582317                            |
| 697.1140754                                                  | 0.961361546                                     | 2013.616883                           | 0.404242145                            |
| 359.7647059                                                  | 0.976643599                                     | 914.7551427                           | 0.321362525                            |
| 300.9126506                                                  | 0.936746988                                     | 628.7865018                           | 0.402739055                            |
| 232.5313765                                                  | 0.970394737                                     | 534.0213212                           | 0.410704167                            |
| 301.3380917                                                  | 0.980841473                                     | 744.702093                            | 0.426741382                            |
| 277.7131783                                                  | 0.918604651                                     | 607.0096312                           | 0.284259987                            |
| 342.8099415                                                  | 0.98245614                                      | 1006.411106                           | 0.381200037                            |
| 152.9615385                                                  | 0.942307692                                     | 365.7833931                           | 0.325825014                            |
| 134.23                                                       | 0.9025                                          | 251.8224088                           | 0.395829938                            |
| 156.6613546                                                  | 0.97310757                                      | 287.4725681                           | 0.416234557                            |

| log.sigma.1.0.mm.3D_glcmm_Homogeneity2 | log.sigma.1.0.mm.3D_glcmm_ClusterShade | log.sigma.1.0.mm.3D_glcmm_MaximumProbability | log.sigma.1.0.mm.3D_glcmm_Ldmn | log.sigma.1.0.mm.3D_glcmm_SumVariance2 |
|----------------------------------------|----------------------------------------|----------------------------------------------|--------------------------------|----------------------------------------|
| 0.255678003                            | 44.48255112                            | 0.038140959                                  | 0.960532299                    | 26.88040418                            |
| 0.403977891                            | 20.71064507                            | 0.105869024                                  | 0.976369339                    | 15.99653613                            |
| 0.272781847                            | 112.4600706                            | 0.04773512                                   | 0.956699291                    | 25.39053805                            |
| 0.224221653                            | 38.64239732                            | 0.028238765                                  | 0.970758673                    | 34.88344422                            |
| 0.310550437                            | 2.999807984                            | 0.03607485                                   | 0.968559421                    | 15.77590834                            |
| 0.290077386                            | 5.997557964                            | 0.027594483                                  | 0.969118427                    | 16.02424893                            |
| 0.315576386                            | -40.22299799                           | 0.062877106                                  | 0.963054322                    | 14.87925717                            |
| 0.239623916                            | 7.54920357                             | 0.016898229                                  | 0.965216294                    | 29.09175731                            |
| 0.279453682                            | 5.193623679                            | 0.021159931                                  | 0.971688255                    | 23.20528915                            |
| 0.313089754                            | 37.90889521                            | 0.054352438                                  | 0.980843123                    | 19.89818286                            |
| 0.293662541                            | 1.435806729                            | 0.026171558                                  | 0.962924608                    | 14.14326454                            |
| 0.263271866                            | 20.0004533                             | 0.045488912                                  | 0.977302236                    | 25.63652832                            |
| 0.31577121                             | 14.81433831                            | 0.032274941                                  | 0.980491965                    | 13.64592821                            |
| 0.342194285                            | 11.52748472                            | 0.038936857                                  | 0.963450556                    | 12.91063751                            |
| 0.271176587                            | -7.596907877                           | 0.02505619                                   | 0.969361945                    | 18.91965008                            |
| 0.506297038                            | 22.38900733                            | 0.167953636                                  | 0.988871435                    | 9.304353388                            |
| 0.29820097                             | 5.012065097                            | 0.026108477                                  | 0.949021308                    | 16.16492433                            |
| 0.363656676                            | 20.79804932                            | 0.049400271                                  | 0.976957498                    | 14.0665746                             |
| 0.275256553                            | 1.687786938                            | 0.024265141                                  | 0.959054191                    | 20.86883637                            |
| 0.444994169                            | 9.0520296                              | 0.111528517                                  | 0.978086322                    | 9.198327662                            |
| 0.365750957                            | 25.07692888                            | 0.087779043                                  | 0.981582455                    | 13.95353672                            |
| 0.292381474                            | 35.93431162                            | 0.026747482                                  | 0.981444415                    | 17.85241795                            |
| 0.38257361                             | 17.40211477                            | 0.089442808                                  | 0.974967886                    | 11.53041324                            |
| 0.254047568                            | -23.61561243                           | 0.030793228                                  | 0.963282173                    | 25.10031577                            |
| 0.361265699                            | 24.51338938                            | 0.067577418                                  | 0.978797096                    | 12.76861115                            |
| 0.317562791                            | 18.71418182                            | 0.050028566                                  | 0.967765796                    | 19.17720258                            |
| 0.39543806                             | 15.01126881                            | 0.093267614                                  | 0.984111748                    | 13.18265556                            |
| 0.34713847                             | 47.55988577                            | 0.069577186                                  | 0.978585482                    | 17.01439587                            |
| 0.274631358                            | -7.224971961                           | 0.023821326                                  | 0.958491787                    | 23.84475719                            |
| 0.416535284                            | 26.09762064                            | 0.107518715                                  | 0.982869699                    | 13.9116651                             |
| 0.349898881                            | 37.39057288                            | 0.074612419                                  | 0.979705062                    | 14.51670342                            |
| 0.419429439                            | 13.6953437                             | 0.09462609                                   | 0.983466312                    | 9.259418168                            |
| 0.259186834                            | 25.16529948                            | 0.028735346                                  | 0.97344591                     | 28.49455259                            |
| 0.22128771                             | -41.36391869                           | 0.037136093                                  | 0.952176122                    | 31.84956128                            |
| 0.224925961                            | -4.366858867                           | 0.019429064                                  | 0.945254216                    | 29.71563756                            |
| 0.302048365                            | 1.055471592                            | 0.027872372                                  | 0.975180825                    | 16.53195945                            |
| 0.310445668                            | 61.32011224                            | 0.073217613                                  | 0.972360212                    | 24.63056407                            |
| 0.278739793                            | 8.032164773                            | 0.043747346                                  | 0.980914409                    | 18.88452349                            |
| 0.299758736                            | -11.24021172                           | 0.030012132                                  | 0.956923474                    | 14.02543971                            |
| 0.266779844                            | 27.68183042                            | 0.029572084                                  | 0.974406799                    | 24.00883869                            |
| 0.340036132                            | 15.33179728                            | 0.065851821                                  | 0.969224936                    | 19.22304682                            |
| 0.287928082                            | 9.51341206                             | 0.025055446                                  | 0.962466151                    | 19.93916827                            |
| 0.271105334                            | -5.259440542                           | 0.022144524                                  | 0.967967893                    | 20.99521328                            |
| 0.268323601                            | 13.82722163                            | 0.02194569                                   | 0.967482987                    | 23.83521149                            |
| 0.261983728                            | -4.076492407                           | 0.020629014                                  | 0.976495146                    | 22.71299102                            |
| 0.347572709                            | 27.98245453                            | 0.067161209                                  | 0.977529854                    | 14.02507241                            |
| 0.247562168                            | 23.15251215                            | 0.026558981                                  | 0.978748338                    | 28.18280942                            |
| 0.270635025                            | 16.54994726                            | 0.024844928                                  | 0.967693334                    | 20.35097399                            |
| 0.282372038                            | -64.96807507                           | 0.053951209                                  | 0.95029218                     | 20.04283567                            |
| 0.257416755                            | -19.78940547                           | 0.026253338                                  | 0.967941045                    | 22.09049456                            |
| 0.323051733                            | 16.18417273                            | 0.051155645                                  | 0.978253636                    | 17.08048271                            |
| 0.265707996                            | -1.297279321                           | 0.022174752                                  | 0.967638535                    | 20.3550421                             |
| 0.307131577                            | 14.38334658                            | 0.056689735                                  | 0.984756793                    | 17.99015055                            |
| 0.299766018                            | 9.769964017                            | 0.035145493                                  | 0.96135135                     | 15.28291054                            |
| 0.42681701                             | 17.15200631                            | 0.123575738                                  | 0.980980186                    | 13.81902237                            |
| 0.220885107                            | 4.266124784                            | 0.022907788                                  | 0.952838778                    | 36.10994002                            |
| 0.236374254                            | 19.12710357                            | 0.014883568                                  | 0.96944714                     | 31.68037547                            |
| 0.253946197                            | -66.11649892                           | 0.025427059                                  | 0.964384253                    | 27.47979392                            |
| 0.327589337                            | 0.896918447                            | 0.062713995                                  | 0.978593801                    | 19.54322905                            |
| 0.33969031                             | 2.638631828                            | 0.049423019                                  | 0.980678769                    | 12.35105788                            |
| 0.279579059                            | 24.98259248                            | 0.031958905                                  | 0.976157801                    | 21.13568922                            |
| 0.305427681                            | 37.56462652                            | 0.054361559                                  | 0.980682132                    | 22.75463836                            |
| 0.396961298                            | 11.24376506                            | 0.098188754                                  | 0.982793375                    | 11.63108874                            |
| 0.459387562                            | -65.53046889                           | 0.119491981                                  | 0.99444232                     | 12.12610551                            |
| 0.302430625                            | 9.70453745                             | 0.047291147                                  | 0.939712714                    | 16.81597386                            |
| 0.29441573                             | 18.92277983                            | 0.036770911                                  | 0.970749242                    | 25.86010483                            |
| 0.21496305                             | -21.74805677                           | 0.020412974                                  | 0.945814819                    | 28.06644985                            |
| 0.297798334                            | 13.67657504                            | 0.03570855                                   | 0.981157447                    | 21.07886049                            |
| 0.259219673                            | -2.557563387                           | 0.024076139                                  | 0.962136001                    | 20.10377639                            |
| 0.276594407                            | 36.86665443                            | 0.041639284                                  | 0.97529751                     | 26.26692672                            |
| 0.31829588                             | 21.72961867                            | 0.042471347                                  | 0.974036536                    | 17.33835774                            |
| 0.298667459                            | 11.70118959                            | 0.027172546                                  | 0.974890439                    | 16.98285928                            |
| 0.380394609                            | 23.27825781                            | 0.085394875                                  | 0.982806993                    | 13.81037421                            |
| 0.401966756                            | 18.43009095                            | 0.094984387                                  | 0.988635398                    | 11.98140614                            |
| 0.345726476                            | 16.6006715                             | 0.059389726                                  | 0.981160784                    | 19.12274449                            |
| 0.205472586                            | -32.08953385                           | 0.014554311                                  | 0.971655234                    | 33.75027991                            |
| 0.279110749                            | 9.842006254                            | 0.024044627                                  | 0.967520761                    | 19.2802779                             |
| 0.266102091                            | 22.36347314                            | 0.026775589                                  | 0.953363309                    | 20.7217229                             |
| 0.293528571                            | 12.46899855                            | 0.028522748                                  | 0.970765664                    | 19.14744152                            |
| 0.300436975                            | 36.00728647                            | 0.052896699                                  | 0.975940264                    | 20.84041442                            |
| 0.245693639                            | 11.80969388                            | 0.025709367                                  | 0.96503422                     | 27.04070214                            |
| 0.189137965                            | -31.95886005                           | 0.012400105                                  | 0.963606622                    | 40.79535296                            |
| 0.242180707                            | -15.91309547                           | 0.031217872                                  | 0.98402915                     | 41.01782565                            |
| 0.291302826                            | -31.13049935                           | 0.052898546                                  | 0.955669746                    | 21.53280802                            |
| 0.321126615                            | 14.50990957                            | 0.052003729                                  | 0.978035858                    | 15.21729103                            |
| 0.382774906                            | 24.92074861                            | 0.075507451                                  | 0.989221348                    | 12.80214449                            |
| 0.284302298                            | 17.74377437                            | 0.025947578                                  | 0.970454069                    | 18.02816017                            |
| 0.249819671                            | -12.31982112                           | 0.019408216                                  | 0.967033845                    | 24.56713867                            |
| 0.312967365                            | -8.711709749                           | 0.062254181                                  | 0.965755483                    | 14.29385951                            |
| 0.234866161                            | -113.7964615                           | 0.048621599                                  | 0.93955439                     | 31.93531553                            |
| 0.329379238                            | -38.55892453                           | 0.058080538                                  | 0.985492878                    | 21.51773358                            |
| 0.23394446                             | 57.79658482                            | 0.025401749                                  | 0.970193777                    | 32.77558513                            |
| 0.328898152                            | 21.13377441                            | 0.071801995                                  | 0.973952072                    | 21.40286486                            |
| 0.334318795                            | 23.97341053                            | 0.05377393                                   | 0.981796368                    | 17.37841002                            |
| 0.353027317                            | 22.26129021                            | 0.071025007                                  | 0.987562144                    | 14.42335493                            |
| 0.193642438                            | 88.45313883                            | 0.021254284                                  | 0.948119715                    | 48.78391786                            |
| 0.298625194                            | -77.21786194                           | 0.035847225                                  | 0.981542885                    | 21.21461937                            |
| 0.234273192                            | -37.76871391                           | 0.031165818                                  | 0.936998164                    | 27.84519533                            |
| 0.312637435                            | 3.632797815                            | 0.03746798                                   | 0.970970487                    | 15.81490908                            |
| 0.342839237                            | 80.2255454                             | 0.058573803                                  | 0.972964006                    | 21.68834703                            |

| log.sigma.1.0.mm.3D_glc_m_Contrast | log.sigma.1.0.mm.3D_glc_m_DifferenceEntropy | log.sigma.1.0.mm.3D_glc_m_InverseVariance | log.sigma.1.0.mm.3D_glc_m_Entropy | log.sigma.1.0.mm.3D_glc_m_Dissimilarity |
|------------------------------------|---------------------------------------------|-------------------------------------------|-----------------------------------|-----------------------------------------|
| 25.91437373                        | 3.448567526                                 | 0.246492951                               | 7.363927373                       | 3.873247791                             |
| 14.06834727                        | 2.974904391                                 | 0.344633897                               | 6.398559486                       | 2.53603082                              |
| 24.93728096                        | 3.384837281                                 | 0.266467503                               | 6.941134427                       | 3.669138283                             |
| 37.52354298                        | 3.709898078                                 | 0.220661096                               | 8.021534814                       | 4.623034135                             |
| 12.6035514                         | 2.957787783                                 | 0.307344807                               | 6.409555264                       | 2.738029896                             |
| 15.10265803                        | 3.087470882                                 | 0.29923399                                | 6.801691346                       | 2.989341925                             |
| 15.43353488                        | 3.063633782                                 | 0.308740596                               | 6.302474782                       | 2.906991315                             |
| 26.41982064                        | 3.463831153                                 | 0.246072498                               | 7.592629989                       | 3.94550406                              |
| 19.64070727                        | 3.275565845                                 | 0.277183871                               | 7.353926779                       | 3.337703186                             |
| 18.86575764                        | 3.217253595                                 | 0.303602549                               | 7.02792541                        | 3.118575838                             |
| 13.54153373                        | 3.016550744                                 | 0.303718755                               | 6.699815357                       | 2.858069703                             |
| 28.99932491                        | 3.493552641                                 | 0.257984659                               | 7.364973999                       | 3.915686439                             |
| 12.04959435                        | 2.944372635                                 | 0.323504072                               | 6.643898876                       | 2.654541256                             |
| 10.57470341                        | 2.851019423                                 | 0.333842444                               | 6.470303935                       | 2.473830255                             |
| 18.15947904                        | 3.210193329                                 | 0.275983974                               | 7.033468884                       | 3.251929515                             |
| 8.266195516                        | 2.545027805                                 | 0.400915285                               | 5.4024096                         | 1.771538756                             |
| 13.50015125                        | 3.014451128                                 | 0.300699448                               | 6.747902969                       | 2.848416354                             |
| 11.18750137                        | 2.888783294                                 | 0.344831452                               | 6.548033494                       | 2.441317879                             |
| 16.88503893                        | 3.152970673                                 | 0.274254563                               | 7.005199763                       | 3.177307475                             |
| 7.927602667                        | 2.63974885                                  | 0.378771682                               | 5.863725965                       | 1.942459355                             |
| 13.50718881                        | 3.012462915                                 | 0.334900133                               | 6.536287597                       | 2.618514964                             |
| 15.70360568                        | 3.102584274                                 | 0.298985132                               | 6.935806119                       | 2.993674592                             |
| 9.980335629                        | 2.818601433                                 | 0.347239622                               | 6.267473543                       | 2.30075026                              |
| 23.96383852                        | 3.377633426                                 | 0.257760993                               | 7.224561792                       | 3.725410916                             |
| 12.36303896                        | 2.93985663                                  | 0.340744038                               | 6.370985478                       | 2.526771182                             |
| 17.83875453                        | 3.173992808                                 | 0.304785807                               | 6.861194252                       | 3.069203556                             |
| 12.60911477                        | 2.932943101                                 | 0.350937679                               | 6.348671817                       | 2.443241204                             |
| 15.99780803                        | 3.091115633                                 | 0.333327663                               | 6.659207542                       | 2.826904753                             |
| 21.26004456                        | 3.292506567                                 | 0.275171836                               | 7.35993989                        | 3.467510123                             |
| 12.76077465                        | 2.905836328                                 | 0.361127674                               | 6.232895361                       | 2.383481776                             |
| 13.98955235                        | 3.023997483                                 | 0.332507283                               | 6.567675152                       | 2.673283478                             |
| 7.102404764                        | 2.604420221                                 | 0.384368758                               | 5.929881619                       | 1.934983009                             |
| 26.44125352                        | 3.462427616                                 | 0.259580502                               | 7.622263935                       | 3.826811008                             |
| 29.47154607                        | 3.374628896                                 | 0.227937221                               | 6.307226505                       | 4.210206777                             |
| 28.79560697                        | 3.477068607                                 | 0.239216675                               | 7.273842056                       | 4.145467993                             |
| 14.32028543                        | 3.06814835                                  | 0.303169861                               | 6.917785229                       | 2.888175682                             |
| 22.55188917                        | 3.354424442                                 | 0.277148228                               | 7.224184763                       | 3.424807365                             |
| 20.94772255                        | 3.3201726                                   | 0.280477308                               | 7.201305719                       | 3.444822504                             |
| 12.58875983                        | 2.957449417                                 | 0.312569236                               | 6.628167655                       | 2.771301797                             |
| 22.03516405                        | 3.343539079                                 | 0.263886625                               | 7.322597145                       | 3.539562382                             |
| 18.55900612                        | 3.205457993                                 | 0.308554971                               | 6.90671262                        | 3.057344752                             |
| 17.20846063                        | 3.176910228                                 | 0.293690002                               | 7.080499636                       | 3.138153735                             |
| 18.90133077                        | 3.238441415                                 | 0.274899198                               | 7.229962647                       | 3.32961133                              |
| 21.08449078                        | 3.306958137                                 | 0.270983899                               | 7.322931449                       | 3.468147633                             |
| 21.63644366                        | 3.331069563                                 | 0.264364304                               | 7.363597981                       | 3.517019499                             |
| 13.03851969                        | 2.994754923                                 | 0.327506116                               | 6.555577949                       | 2.64004068                              |
| 30.03942229                        | 3.554489585                                 | 0.246388645                               | 7.751827115                       | 4.06770266                              |
| 19.0814759                         | 3.243948293                                 | 0.265027749                               | 7.043362555                       | 3.350493829                             |
| 16.99392024                        | 3.079295056                                 | 0.286236209                               | 6.152333794                       | 3.152579198                             |
| 20.50689265                        | 3.281008246                                 | 0.260298974                               | 7.053772893                       | 3.502724047                             |
| 16.08078876                        | 3.136151832                                 | 0.307167537                               | 6.946116176                       | 2.937395886                             |
| 19.03989305                        | 3.242699274                                 | 0.265235207                               | 7.101472232                       | 3.371173816                             |
| 18.69874081                        | 3.242651772                                 | 0.286136493                               | 7.031774143                       | 3.197404771                             |
| 14.23526464                        | 3.048537159                                 | 0.303468188                               | 6.706899932                       | 2.896909476                             |
| 12.0948248                         | 2.874796642                                 | 0.354580955                               | 6.186469418                       | 2.328994553                             |
| 34.55274269                        | 3.646945141                                 | 0.217410295                               | 7.846264654                       | 4.492572495                             |
| 28.57582595                        | 3.505595828                                 | 0.242772917                               | 7.775142102                       | 4.070058888                             |
| 25.37659112                        | 3.430803513                                 | 0.2453939012                              | 7.455798163                       | 3.79428731                              |
| 18.61298494                        | 3.193736261                                 | 0.305411274                               | 6.822369452                       | 3.065822703                             |
| 11.12511542                        | 2.876800747                                 | 0.335182054                               | 6.349558962                       | 2.491427079                             |
| 19.01505007                        | 3.251844327                                 | 0.278338931                               | 7.237962839                       | 3.289969555                             |
| 21.46701184                        | 3.325240983                                 | 0.283021348                               | 7.30689363                        | 3.358464877                             |
| 10.76107577                        | 2.851363047                                 | 0.353989397                               | 6.238251944                       | 2.309490324                             |
| 11.3041545                         | 2.704533422                                 | 0.380304232                               | 5.791001942                       | 2.058672692                             |
| 14.32195413                        | 3.019728388                                 | 0.29813418                                | 6.442069075                       | 2.90811164                              |
| 24.01825662                        | 3.374731181                                 | 0.288876472                               | 7.387092873                       | 3.549340702                             |
| 27.95118189                        | 3.47513609                                  | 0.222450003                               | 7.327893596                       | 4.1808547                               |
| 18.23009417                        | 3.225521237                                 | 0.290257308                               | 7.212353212                       | 3.181112687                             |
| 18.85365315                        | 3.235611896                                 | 0.262608301                               | 7.028317534                       | 3.38434558                              |
| 24.55032362                        | 3.408598919                                 | 0.267256014                               | 7.451179171                       | 3.650397892                             |
| 15.15570142                        | 3.094045294                                 | 0.312139811                               | 6.916198115                       | 2.892858757                             |
| 14.55539131                        | 3.064124992                                 | 0.308627014                               | 6.880025897                       | 2.906000713                             |
| 12.65045483                        | 2.954398437                                 | 0.341040146                               | 6.498764898                       | 2.494951211                             |
| 10.86571109                        | 2.848414368                                 | 0.360931824                               | 6.273510853                       | 2.289788487                             |
| 18.56595921                        | 3.18658941                                  | 0.322987683                               | 6.968363493                       | 2.997438144                             |
| 34.07036034                        | 3.626787274                                 | 0.214162026                               | 7.844014172                       | 4.508020984                             |
| 17.6447731                         | 3.195924809                                 | 0.282265346                               | 7.078330968                       | 3.208048316                             |
| 19.61804447                        | 3.259940227                                 | 0.269416802                               | 7.08518194                        | 3.40619946                              |
| 17.17360799                        | 3.183330644                                 | 0.290348814                               | 7.081235173                       | 3.132570824                             |
| 19.31244137                        | 3.261367949                                 | 0.284635309                               | 7.175413623                       | 3.241079073                             |
| 24.76525848                        | 3.393495309                                 | 0.252053459                               | 7.270739514                       | 3.788836571                             |
| 41.93623348                        | 3.776296906                                 | 0.201016545                               | 8.122955574                       | 5.035931031                             |
| 41.02320432                        | 3.746070804                                 | 0.230771358                               | 8.058441022                       | 4.666160451                             |
| 16.85239692                        | 3.061383777                                 | 0.309555582                               | 6.229842051                       | 3.096193499                             |
| 13.73914838                        | 3.036960487                                 | 0.316798362                               | 6.785925108                       | 2.778314336                             |
| 12.52005855                        | 2.926522814                                 | 0.352120067                               | 6.39025334                        | 2.444860811                             |
| 15.85062239                        | 3.114203465                                 | 0.297424752                               | 6.897121155                       | 3.059212042                             |
| 21.10438573                        | 3.320091047                                 | 0.257323814                               | 7.416421894                       | 3.571476045                             |
| 13.90997913                        | 2.879782047                                 | 0.305631027                               | 5.991388115                       | 2.839522676                             |
| 33.03852878                        | 3.408578642                                 | 0.240223304                               | 6.055719467                       | 4.319083102                             |
| 20.31203992                        | 3.251174032                                 | 0.30600803                                | 7.088078518                       | 3.162671778                             |
| 34.25161617                        | 3.610092718                                 | 0.232612151                               | 7.553246024                       | 4.364088159                             |
| 21.3586196                         | 3.279586218                                 | 0.30424277                                | 6.967352883                       | 3.255097398                             |
| 16.71295797                        | 3.141046814                                 | 0.313401288                               | 6.917609504                       | 2.915820565                             |
| 13.52214425                        | 3.005227929                                 | 0.33811554                                | 6.625750667                       | 2.634215704                             |
| 45.10385528                        | 3.752678394                                 | 0.196821508                               | 7.440338813                       | 5.131986279                             |
| 19.61071825                        | 3.223745394                                 | 0.29029786                                | 6.98408664                        | 3.201171973                             |
| 24.65242757                        | 3.296776827                                 | 0.228847744                               | 6.481868791                       | 3.899157365                             |
| 12.89628525                        | 2.967919346                                 | 0.31620237                                | 6.450790048                       | 2.732070105                             |
| 19.42179704                        | 3.184694437                                 | 0.315794592                               | 6.718447201                       | 3.033237561                             |



| log.sigma.1.0.mm.3D_glcm_DifferenceVariance | log.sigma.1.0.mm.3D_glcm_ldn | log.sigma.1.0.mm.3D_glcm_ldm | log.sigma.1.0.mm.3D_glcm_Correlation | log.sigma.1.0.mm.3D_glcm_Autocorrelation |
|---------------------------------------------|------------------------------|------------------------------|--------------------------------------|------------------------------------------|
| 10.84643174                                 | 0.872126748                  | 0.255678003                  | 0.017769193                          | 106.0586551                              |
| 7.587860492                                 | 0.909922553                  | 0.403977891                  | 0.062377971                          | 153.3127983                              |
| 11.44916516                                 | 0.870170274                  | 0.272781847                  | 0.008105864                          | 68.78374907                              |
| 16.108609                                   | 0.888999816                  | 0.224221653                  | -0.031660493                         | 314.3193452                              |
| 5.049836898                                 | 0.882749883                  | 0.310550437                  | 0.110760908                          | 70.95746094                              |
| 6.145275453                                 | 0.884009913                  | 0.290077386                  | 0.029309932                          | 124.9138672                              |
| 6.891866983                                 | 0.878513234                  | 0.315576386                  | -0.013814354                         | 151.4683155                              |
| 10.81078936                                 | 0.877872742                  | 0.239623916                  | 0.04819853                           | 204.5530129                              |
| 8.478075915                                 | 0.890696393                  | 0.279453682                  | 0.083365387                          | 176.8105913                              |
| 9.117782199                                 | 0.912556067                  | 0.313089754                  | 0.026406648                          | 236.2061066                              |
| 5.347718132                                 | 0.872777865                  | 0.293662541                  | 0.021502573                          | 104.0928795                              |
| 13.53541499                                 | 0.904321456                  | 0.263271866                  | -0.05761681                          | 374.1417073                              |
| 4.96295824                                  | 0.906260326                  | 0.31577121                   | 0.062789495                          | 111.1443624                              |
| 4.362572137                                 | 0.876464059                  | 0.342194285                  | 0.098470303                          | 72.7752596                               |
| 7.572646911                                 | 0.884826548                  | 0.2711176587                 | 0.020478276                          | 159.3000211                              |
| 5.102187682                                 | 0.941520628                  | 0.506297038                  | 0.059481068                          | 110.4223615                              |
| 5.30673801                                  | 0.85341919                   | 0.29820097                   | 0.0889226                            | 53.30049546                              |
| 5.168143846                                 | 0.903525531                  | 0.363656676                  | 0.112469758                          | 108.6343358                              |
| 6.689093533                                 | 0.867571337                  | 0.275256553                  | 0.105145251                          | 90.09871748                              |
| 4.088806137                                 | 0.910887591                  | 0.444994169                  | 0.073566179                          | 89.05018838                              |
| 6.644906236                                 | 0.915155413                  | 0.365750957                  | 0.016148204                          | 151.2381084                              |
| 6.654339392                                 | 0.909165153                  | 0.292381474                  | 0.063533284                          | 182.8312227                              |
| 4.616510568                                 | 0.900325479                  | 0.38257361                   | 0.070741829                          | 106.3811268                              |
| 10.02006089                                 | 0.875987073                  | 0.254047568                  | 0.023325812                          | 156.879883                               |
| 5.949847232                                 | 0.90837788                   | 0.361265699                  | 0.015333664                          | 66.12945074                              |
| 8.367435914                                 | 0.887994033                  | 0.317562791                  | 0.033803927                          | 147.3619806                              |
| 6.63026592                                  | 0.923246922                  | 0.39543806                   | 0.022641541                          | 270.4005052                              |
| 7.979708057                                 | 0.909643171                  | 0.34713847                   | 0.029433286                          | 173.4004347                              |
| 8.929064149                                 | 0.870190576                  | 0.274631358                  | 0.059940074                          | 135.4325419                              |
| 7.067723453                                 | 0.923065586                  | 0.416535284                  | 0.042502534                          | 148.7714665                              |
| 6.823879869                                 | 0.910550376                  | 0.349898881                  | 0.018663007                          | 104.0209566                              |
| 3.320482836                                 | 0.917573954                  | 0.419429439                  | 0.131298399                          | 72.90761748                              |
| 11.74061715                                 | 0.895145199                  | 0.259186834                  | 0.037545237                          | 184.4092836                              |
| 11.66498061                                 | 0.857540992                  | 0.22128771                   | 0.040023434                          | 106.1500004                              |
| 11.4603016                                  | 0.849095029                  | 0.224925961                  | 0.017226807                          | 128.9563717                              |
| 5.963997927                                 | 0.895725217                  | 0.302048365                  | 0.071353582                          | 129.9943612                              |
| 10.77436755                                 | 0.896745339                  | 0.310445668                  | 0.043242373                          | 152.8411814                              |
| 9.076371345                                 | 0.908837711                  | 0.278739793                  | -0.04632512                          | 419.3943032                              |
| 4.802776609                                 | 0.863356608                  | 0.299758736                  | 0.055588055                          | 73.52689969                              |
| 9.480560643                                 | 0.89551134                   | 0.266779844                  | 0.042645478                          | 205.2670558                              |
| 9.174785446                                 | 0.893287566                  | 0.340036132                  | 0.017005703                          | 154.1180658                              |
| 7.338890482                                 | 0.875073519                  | 0.287928082                  | 0.073044799                          | 127.1005082                              |
| 7.701331653                                 | 0.882555351                  | 0.271105334                  | 0.052548632                          | 151.6642129                              |
| 8.96975991                                  | 0.883222587                  | 0.268323601                  | 0.060374553                          | 129.2766084                              |
| 9.217470524                                 | 0.898932362                  | 0.261983728                  | 0.024877884                          | 236.4987935                              |
| 6.043225332                                 | 0.904513651                  | 0.347572709                  | 0.033919482                          | 87.1579365                               |
| 13.46673292                                 | 0.905304985                  | 0.247562168                  | -0.028366146                         | 418.4627859                              |
| 7.829053683                                 | 0.881895138                  | 0.270635025                  | 0.03148715                           | 148.7767352                              |
| 6.987996417                                 | 0.856818233                  | 0.282372038                  | 0.085437418                          | 83.70754186                              |
| 8.186905338                                 | 0.881405158                  | 0.257416755                  | 0.038371944                          | 180.684987                               |
| 7.418004407                                 | 0.905715974                  | 0.323051733                  | 0.030306558                          | 179.3479441                              |
| 7.57730937                                  | 0.881033483                  | 0.265707996                  | 0.033498823                          | 122.8624738                              |
| 8.419937926                                 | 0.919212364                  | 0.307131577                  | -0.015280964                         | 374.4335373                              |
| 5.825948282                                 | 0.871923364                  | 0.299766018                  | 0.035755572                          | 71.71688715                              |
| 6.595780713                                 | 0.919266735                  | 0.42681701                   | 0.067435223                          | 131.5848066                              |
| 14.31678031                                 | 0.860369006                  | 0.220885107                  | 0.022128949                          | 150.4243155                              |
| 11.69081785                                 | 0.885722083                  | 0.236374254                  | 0.051282327                          | 206.2963029                              |
| 10.78345099                                 | 0.878576003                  | 0.253946197                  | 0.041594894                          | 210.5083657                              |
| 9.189986057                                 | 0.908916702                  | 0.327589337                  | 0.024577704                          | 149.9503674                              |
| 4.904113623                                 | 0.908413891                  | 0.33969031                   | 0.050648783                          | 235.8919115                              |
| 8.157353634                                 | 0.898629647                  | 0.279579059                  | 0.052968264                          | 233.0359045                              |
| 10.13205101                                 | 0.911690707                  | 0.305427681                  | 0.032063665                          | 276.3139427                              |
| 5.383162383                                 | 0.918626609                  | 0.396961298                  | 0.040332286                          | 212.2382876                              |
| 7.037044571                                 | 0.957094546                  | 0.459387562                  | 0.033859021                          | 1180.840264                              |
| 5.844515985                                 | 0.843532024                  | 0.302430625                  | 0.07912042                           | 51.76206894                              |
| 11.3571972                                  | 0.893484388                  | 0.29441573                   | 0.036855428                          | 188.2703238                              |
| 10.37373541                                 | 0.846795864                  | 0.21496305                   | 0.003055023                          | 146.475921                               |
| 8.080034624                                 | 0.910235432                  | 0.297798334                  | 0.072353997                          | 269.9035505                              |
| 7.38653415                                  | 0.87107658                   | 0.259219673                  | 0.031761923                          | 146.0187108                              |
| 11.13608866                                 | 0.899487944                  | 0.276594407                  | 0.034927563                          | 181.6110018                              |
| 6.716710955                                 | 0.896439522                  | 0.318299588                  | 0.065534348                          | 152.6908206                              |
| 6.085644814                                 | 0.895207072                  | 0.298667459                  | 0.076516334                          | 148.7679735                              |
| 6.391310538                                 | 0.918882005                  | 0.380394609                  | 0.043583705                          | 152.7911351                              |
| 5.607884219                                 | 0.93360086                   | 0.401966756                  | 0.047881471                          | 127.7866287                              |
| 9.561010835                                 | 0.91627047                   | 0.345726476                  | 0.015059822                          | 246.4876414                              |
| 13.60119854                                 | 0.887668532                  | 0.205472586                  | -0.002072693                         | 236.2704332                              |
| 7.302811627                                 | 0.881917766                  | 0.279110749                  | 0.044416702                          | 125.6862399                              |
| 7.952357142                                 | 0.860330244                  | 0.266102091                  | 0.026753311                          | 82.00274025                              |
| 7.299455128                                 | 0.888783299                  | 0.293528571                  | 0.053749109                          | 171.8274969                              |
| 8.775071618                                 | 0.900597681                  | 0.300436975                  | 0.038036053                          | 128.0134209                              |
| 10.3413191                                  | 0.87825439                   | 0.245693639                  | 0.041266084                          | 192.4324769                              |
| 16.50540147                                 | 0.873614317                  | 0.189137965                  | -0.009795015                         | 273.88288                                |
| 19.11362237                                 | 0.918615396                  | 0.242180707                  | 0.004341735                          | 1069.400627                              |
| 7.206096196                                 | 0.86571343                   | 0.291302826                  | 0.122271525                          | 110.7267755                              |
| 5.97958309                                  | 0.903129637                  | 0.321126615                  | 0.050152279                          | 131.727617                               |
| 6.526256112                                 | 0.935342387                  | 0.382774906                  | 0.013263837                          | 275.0752968                              |
| 6.481855418                                 | 0.886221134                  | 0.284302298                  | 0.063628092                          | 148.5117186                              |
| 8.289111638                                 | 0.879296664                  | 0.249819671                  | 0.075555403                          | 202.9280053                              |
| 5.352467512                                 | 0.879744986                  | 0.312967365                  | 0.018587524                          | 157.987692                               |
| 14.14895219                                 | 0.845974249                  | 0.234866161                  | -0.015064114                         | 162.8730829                              |
| 10.27386995                                 | 0.924751553                  | 0.329379238                  | 0.026769451                          | 595.78537                                |
| 15.15303859                                 | 0.889084895                  | 0.233944446                  | -0.019692106                         | 291.4913321                              |
| 10.72757186                                 | 0.901695601                  | 0.328898152                  | 0.000907745                          | 207.1697792                              |
| 8.174017704                                 | 0.915165084                  | 0.334318795                  | 0.019394481                          | 179.5115996                              |
| 6.569441068                                 | 0.928539389                  | 0.353027317                  | 0.032619974                          | 239.5328229                              |
| 18.44349604                                 | 0.854041818                  | 0.193642438                  | 0.040571035                          | 200.8480408                              |
| 9.32794651                                  | 0.912753177                  | 0.298625194                  | 0.03945351                           | 315.9527049                              |
| 9.364765579                                 | 0.836910512                  | 0.234273192                  | 0.062824486                          | 127.7430955                              |
| 5.40842092                                  | 0.888228459                  | 0.312637435                  | 0.100809645                          | 93.7712488                               |
| 10.18165977                                 | 0.901793282                  | 0.342839237                  | 0.053581199                          | 104.4261124                              |

| log.sigma.1.0.mm.3D_glc_m_SumEntropy | log.sigma.1.0.mm.3D_glc_m_AverageIntensity | log.sigma.1.0.mm.3D_glc_m_Energy | log.sigma.1.0.mm.3D_glc_m_SumSquares | log.sigma.1.0.mm.3D_glc_m_ClusterProminence |
|--------------------------------------|--------------------------------------------|----------------------------------|--------------------------------------|---------------------------------------------|
| 4.347468119                          | 10.28662773                                | 0.00909313                       | 13.19869448                          | 2277.785116                                 |
| 3.906489693                          | 12.36243835                                | 0.031361322                      | 7.51622085                           | 1153.833068                                 |
| 4.202857654                          | 8.286402071                                | 0.012777441                      | 12.58195475                          | 2928.270492                                 |
| 4.57749305                           | 18.04298971                                | 0.006052603                      | 18.53544412                          | 4495.296205                                 |
| 3.937270669                          | 8.376080628                                | 0.015469622                      | 7.094864936                          | 869.5644571                                 |
| 4.003942742                          | 11.16608883                                | 0.011849886                      | 7.78172674                           | 755.8847072                                 |
| 3.844019675                          | 12.31272661                                | 0.019149522                      | 7.578198012                          | 886.1314316                                 |
| 4.432246514                          | 14.28481382                                | 0.006689525                      | 13.93540105                          | 2382.520884                                 |
| 4.293161619                          | 13.26341305                                | 0.008565685                      | 10.7114991                           | 1773.228699                                 |
| 4.125088137                          | 15.4212266                                 | 0.014376079                      | 10.09914356                          | 1811.445389                                 |
| 3.9242462                            | 10.19502377                                | 0.012378789                      | 6.921199568                          | 575.8231727                                 |
| 4.290674311                          | 19.6214625                                 | 0.010808608                      | 13.63970763                          | 3051.069532                                 |
| 3.898457638                          | 10.52351158                                | 0.014104678                      | 6.42388064                           | 739.4386997                                 |
| 3.845634551                          | 8.496450178                                | 0.015660638                      | 5.871335231                          | 516.8624403                                 |
| 4.128138754                          | 12.61385324                                | 0.010512367                      | 9.26978228                           | 1237.126757                                 |
| 3.378975301                          | 10.49644891                                | 0.067868847                      | 4.401577211                          | 678.2336958                                 |
| 4.004371349                          | 7.254320923                                | 0.011777555                      | 7.416268895                          | 709.1967167                                 |
| 3.905668115                          | 10.38809888                                | 0.017201378                      | 6.313518992                          | 713.3004463                                 |
| 4.181201881                          | 9.439032177                                | 0.010006687                      | 9.438468825                          | 1220.886761                                 |
| 3.573364993                          | 9.419761492                                | 0.035236472                      | 4.281482582                          | 351.8754438                                 |
| 3.867088115                          | 12.29505168                                | 0.023322463                      | 6.886131013                          | 835.6100261                                 |
| 4.069316917                          | 13.50772385                                | 0.011674301                      | 8.4589093                            | 1274.685015                                 |
| 3.749794751                          | 10.29526309                                | 0.023324868                      | 5.377687217                          | 475.9593156                                 |
| 4.291908577                          | 12.51371827                                | 0.009248121                      | 12.26603857                          | 2051.468823                                 |
| 3.80096787                           | 8.125750237                                | 0.020800452                      | 6.282912528                          | 717.5644709                                 |
| 4.087669719                          | 12.12533605                                | 0.013891147                      | 9.253989278                          | 1395.052212                                 |
| 3.790910831                          | 16.45874673                                | 0.028681246                      | 6.57334355                           | 915.7667011                                 |
| 3.967730374                          | 13.16181644                                | 0.01949536                       | 8.289145481                          | 1345.547578                                 |
| 4.297089236                          | 11.60948691                                | 0.008451543                      | 11.27620044                          | 1693.360375                                 |
| 3.792818425                          | 12.18816255                                | 0.034876931                      | 6.703178412                          | 1029.615661                                 |
| 3.885397833                          | 10.19258141                                | 0.020738566                      | 7.126563944                          | 1011.307978                                 |
| 3.600902272                          | 8.506926699                                | 0.029038331                      | 4.090455733                          | 353.1759797                                 |
| 4.431838753                          | 13.60438448                                | 0.007825884                      | 14.10379171                          | 2760.653217                                 |
| 4.125650018                          | 10.27174444                                | 0.014846307                      | 15.33027684                          | 3567.168808                                 |
| 4.380166567                          | 11.34524167                                | 0.007949464                      | 14.62781113                          | 2486.791777                                 |
| 4.053993379                          | 11.37718159                                | 0.011224652                      | 7.713061221                          | 796.9538492                                 |
| 4.276902524                          | 12.3483514                                 | 0.015148731                      | 11.87520019                          | 2298.688231                                 |
| 4.131233377                          | 20.73094056                                | 0.011395469                      | 9.864934692                          | 1336.927125                                 |
| 3.905573074                          | 8.553631619                                | 0.01322842                       | 6.653549886                          | 580.5626836                                 |
| 4.293360113                          | 14.32879258                                | 0.008775257                      | 11.71797389                          | 1946.565546                                 |
| 4.099253136                          | 12.40764072                                | 0.018130991                      | 9.445513236                          | 1438.762511                                 |
| 4.165696789                          | 11.24349864                                | 0.010018245                      | 9.286907227                          | 1238.216511                                 |
| 4.212179074                          | 12.29382166                                | 0.008840435                      | 9.974136013                          | 1276.773305                                 |
| 4.287255579                          | 11.33946631                                | 0.008541641                      | 11.22992557                          | 1858.268474                                 |
| 4.267302788                          | 15.41127799                                | 0.008517116                      | 11.39468663                          | 1748.250692                                 |
| 3.877213919                          | 9.322514035                                | 0.019291305                      | 6.765898025                          | 786.5081282                                 |
| 4.42120454                           | 20.68858287                                | 0.007559961                      | 14.00176177                          | 3132.163718                                 |
| 4.160689538                          | 12.18416942                                | 0.009912192                      | 9.858112473                          | 1292.373632                                 |
| 3.922624965                          | 9.105899348                                | 0.018563384                      | 9.259188976                          | 1455.929055                                 |
| 4.201987914                          | 13.42691889                                | 0.009900342                      | 10.6493468                           | 1423.599407                                 |
| 4.05856559                           | 13.3853746                                 | 0.014077111                      | 8.315815411                          | 1089.811231                                 |
| 4.168321633                          | 11.06931697                                | 0.009183194                      | 9.848733787                          | 1161.788759                                 |
| 4.078469644                          | 19.55574239                                | 0.014153125                      | 9.095370424                          | 1321.852258                                 |
| 3.962076112                          | 8.453024434                                | 0.013357935                      | 7.379543795                          | 752.9172087                                 |
| 3.767537143                          | 11.4521929                                 | 0.039875667                      | 6.478461795                          | 896.2197564                                 |
| 4.585454238                          | 12.24872217                                | 0.005980234                      | 17.66567068                          | 3976.384586                                 |
| 4.497999115                          | 14.37562697                                | 0.006139646                      | 15.38231108                          | 3089.195608                                 |
| 4.362115495                          | 14.49055147                                | 0.008718328                      | 13.21408261                          | 2715.848415                                 |
| 4.092390184                          | 12.24121616                                | 0.017534416                      | 9.601722532                          | 1717.251913                                 |
| 3.79677935                           | 15.34871957                                | 0.018368353                      | 5.869043325                          | 622.4065738                                 |
| 4.211234245                          | 15.26390028                                | 0.009823188                      | 10.16938703                          | 1494.514648                                 |
| 4.258436267                          | 16.75557881                                | 0.011945676                      | 11.59128602                          | 2038.527605                                 |
| 3.743709692                          | 14.56090522                                | 0.027951082                      | 5.598041128                          | 573.8880812                                 |
| 3.582854093                          | 34.3971807                                 | 0.044625703                      | 5.481029241                          | 2463.821104                                 |
| 3.963456632                          | 7.150807138                                | 0.015087093                      | 7.784481997                          | 830.8248195                                 |
| 4.331116439                          | 13.71781053                                | 0.01063927                       | 12.59943804                          | 2434.120994                                 |
| 4.358389461                          | 12.10109376                                | 0.007065543                      | 14.00440794                          | 2066.909846                                 |
| 4.216887244                          | 16.47255757                                | 0.010412032                      | 10.13628823                          | 1503.816378                                 |
| 4.143560596                          | 12.07078827                                | 0.009628209                      | 9.739357385                          | 1139.384531                                 |
| 4.353159296                          | 13.49969424                                | 0.009746235                      | 13.00726706                          | 2497.847854                                 |
| 4.062786968                          | 12.33459526                                | 0.01342887                       | 8.12351479                           | 1015.221678                                 |
| 4.052157525                          | 12.17206368                                | 0.011471674                      | 7.884562648                          | 945.2801817                                 |
| 3.863086025                          | 12.34995995                                | 0.023028334                      | 6.625321168                          | 875.6890588                                 |
| 3.75039093                           | 11.29509412                                | 0.028024762                      | 5.749540087                          | 672.6195952                                 |
| 4.083082294                          | 15.77080315                                | 0.018635428                      | 9.839831124                          | 1752.383629                                 |
| 4.53384378                           | 15.57069037                                | 0.005593045                      | 17.56771307                          | 3588.378602                                 |
| 4.144374633                          | 11.19259379                                | 0.009820403                      | 9.23126275                           | 1189.965572                                 |
| 4.168858289                          | 9.040049736                                | 0.009792456                      | 10.08494184                          | 1254.355983                                 |
| 4.142508091                          | 13.08938185                                | 0.010527821                      | 9.080262379                          | 1125.271615                                 |
| 4.194293854                          | 11.30233711                                | 0.011872459                      | 10.10490214                          | 1695.534083                                 |
| 4.346449805                          | 13.8511725                                 | 0.008921845                      | 12.95149015                          | 2444.305207                                 |
| 4.681842876                          | 16.81412859                                | 0.004560446                      | 21.2651619                           | 4741.401483                                 |
| 4.672228816                          | 32.95888295                                | 0.006844434                      | 20.48799957                          | 6505.164016                                 |
| 4.006615281                          | 10.46587421                                | 0.018010222                      | 9.596301236                          | 1568.637761                                 |
| 3.977815675                          | 11.46111423                                | 0.014431202                      | 7.239109854                          | 774.5462211                                 |
| 3.798508314                          | 16.68997821                                | 0.023660409                      | 6.734175392                          | 949.5996311                                 |
| 4.086519232                          | 12.16406222                                | 0.011224262                      | 8.46969564                           | 1006.032327                                 |
| 4.323542589                          | 14.21459995                                | 0.007588749                      | 11.4178811                           | 1655.013812                                 |
| 3.769739756                          | 12.56426422                                | 0.021700572                      | 7.050959661                          | 663.837066                                  |
| 4.047110088                          | 12.77132307                                | 0.018384046                      | 16.24346108                          | 3222.407312                                 |
| 4.172177626                          | 24.44401781                                | 0.015779441                      | 10.0826629                           | 2421.233935                                 |
| 4.469658382                          | 17.32542355                                | 0.007837136                      | 17.75267123                          | 4139.048602                                 |
| 4.140849982                          | 14.41476352                                | 0.017635709                      | 10.89123331                          | 1922.815006                                 |
| 4.054164025                          | 13.40967236                                | 0.015312701                      | 8.684625415                          | 1392.453832                                 |
| 3.914876203                          | 15.53011756                                | 0.019428385                      | 7.305957944                          | 866.2330914                                 |
| 4.652070889                          | 14.22205385                                | 0.007021205                      | 24.19795007                          | 7347.265081                                 |
| 4.139777434                          | 17.91033963                                | 0.012516076                      | 10.43294412                          | 2951.853451                                 |
| 4.150408473                          | 11.26538786                                | 0.012930929                      | 13.12440573                          | 2153.012593                                 |
| 3.929200054                          | 9.645697018                                | 0.015273205                      | 7.177798584                          | 1017.734885                                 |
| 4.079411993                          | 10.19103153                                | 0.01880302                       | 10.27753602                          | 2650.637536                                 |

| log.sigma.1.0.mm.3D_glmc_SumAverage | log.sigma.1.0.mm.3D_glmc_lmc2 | log.sigma.1.0.mm.3D_glmc_lmc1 | log.sigma.1.0.mm.3D_glmc_DifferenceAverage | log.sigma.1.0.mm.3D_glmc_Id |
|-------------------------------------|-------------------------------|-------------------------------|--------------------------------------------|-----------------------------|
| 20.57325546                         | 0.68204355                    | -0.081885094                  | 3.873247791                                | 0.341877762                 |
| 24.7248767                          | 0.606652462                   | -0.07063299                   | 2.53603082                                 | 0.467028423                 |
| 16.57280414                         | 0.761757727                   | -0.118503445                  | 3.669138283                                | 0.35718023                  |
| 35.49524401                         | 0.549592853                   | -0.043737672                  | 4.623034135                                | 0.311437788                 |
| 16.75216126                         | 0.691935011                   | -0.097754839                  | 2.738029896                                | 0.394634748                 |
| 22.33217766                         | 0.59198425                    | -0.061741358                  | 2.989341925                                | 0.375841755                 |
| 24.62545322                         | 0.706669438                   | -0.104942193                  | 2.906991315                                | 0.396417696                 |
| 28.5572564                          | 0.624705412                   | -0.063237241                  | 3.94550406                                 | 0.328491004                 |
| 26.5268261                          | 0.495761076                   | -0.037833438                  | 3.337702186                                | 0.365039802                 |
| 30.72114018                         | 0.500316306                   | -0.040270546                  | 3.118575838                                | 0.392513576                 |
| 20.39004755                         | 0.515797423                   | -0.045290056                  | 2.858069703                                | 0.380147857                 |
| 38.72875225                         | 0.651859822                   | -0.072855491                  | 3.915686439                                | 0.347799237                 |
| 21.04702317                         | 0.411502421                   | -0.027972111                  | 2.654541256                                | 0.398723606                 |
| 16.99290036                         | 0.486417711                   | -0.045916712                  | 2.473830255                                | 0.420738673                 |
| 25.22770648                         | 0.572962388                   | -0.055142197                  | 3.251929515                                | 0.359937447                 |
| 20.991685                           | 0.569351417                   | -0.071468639                  | 1.771538756                                | 0.55241215                  |
| 14.50864185                         | 0.542522952                   | -0.050989824                  | 2.848416354                                | 0.384011975                 |
| 20.77619777                         | 0.502756748                   | -0.045030345                  | 2.441317879                                | 0.437028641                 |
| 18.87806435                         | 0.63969787                    | -0.073782477                  | 3.177307475                                | 0.364003753                 |
| 18.83952298                         | 0.508487361                   | -0.055144965                  | 1.942459355                                | 0.504386088                 |
| 24.58668972                         | 0.440425184                   | -0.033062031                  | 2.618514964                                | 0.436889004                 |
| 27.00308474                         | 0.493731824                   | -0.041260683                  | 2.993674592                                | 0.37799288                  |
| 20.59052619                         | 0.449604733                   | -0.039959591                  | 2.30075026                                 | 0.453496594                 |
| 25.02743654                         | 0.743542179                   | -0.106058758                  | 3.725410916                                | 0.341800794                 |
| 16.25150047                         | 0.549887323                   | -0.055437428                  | 2.526771782                                | 0.434452133                 |
| 24.2506721                          | 0.707253938                   | -0.097128037                  | 3.069203556                                | 0.396103043                 |
| 32.87898363                         | 0.516737443                   | -0.0479688                    | 2.443241204                                | 0.461160211                 |
| 26.31688096                         | 0.573080601                   | -0.058702329                  | 2.826904753                                | 0.420000818                 |
| 23.21897381                         | 0.559373893                   | -0.055144491                  | 3.467510123                                | 0.359674139                 |
| 24.37075074                         | 0.58249243                    | -0.064755323                  | 2.383481776                                | 0.477554925                 |
| 20.38516281                         | 0.458605092                   | -0.035911083                  | 2.673283478                                | 0.424381469                 |
| 17.0138534                          | 0.387852599                   | -0.029946343                  | 1.934983009                                | 0.48437251                  |
| 27.12155264                         | 0.557545574                   | -0.047966304                  | 3.82681108                                 | 0.344915312                 |
| 20.54348888                         | 0.962287747                   | -0.344101981                  | 4.210206777                                | 0.312497868                 |
| 22.69048333                         | 0.82073499                    | -0.143992517                  | 4.145467993                                | 0.315186332                 |
| 22.75436318                         | 0.425380735                   | -0.028723009                  | 2.888175682                                | 0.386350407                 |
| 24.6836246                          | 0.557181447                   | -0.051314235                  | 3.424807365                                | 0.388357617                 |
| 40.98337878                         | 0.440032618                   | -0.029594573                  | 3.444822504                                | 0.36239783                  |
| 17.10726324                         | 0.508493032                   | -0.045319491                  | 2.771301797                                | 0.38516793                  |
| 28.61968232                         | 0.613298234                   | -0.062559168                  | 3.539562382                                | 0.353788524                 |
| 24.81528143                         | 0.596350532                   | -0.062185775                  | 3.057344752                                | 0.413371254                 |
| 22.48699729                         | 0.571636442                   | -0.054550562                  | 3.138153735                                | 0.372764756                 |
| 24.58764331                         | 0.509309596                   | -0.041183949                  | 3.32961133                                 | 0.358581467                 |
| 22.67893262                         | 0.604307843                   | -0.060446238                  | 3.468147633                                | 0.355264087                 |
| 30.73948692                         | 0.521303773                   | -0.042271075                  | 3.517019499                                | 0.350312202                 |
| 18.64502807                         | 0.487852942                   | -0.040990493                  | 2.64004068                                 | 0.423148506                 |
| 40.93532818                         | 0.484321033                   | -0.033798033                  | 4.06770266                                 | 0.334171722                 |
| 24.36833884                         | 0.641477159                   | -0.072991078                  | 3.350493829                                | 0.358805867                 |
| 18.2117987                          | 0.883390396                   | -0.221441561                  | 3.152579198                                | 0.368860857                 |
| 26.85383778                         | 0.680679678                   | -0.084836249                  | 3.502724047                                | 0.346663739                 |
| 26.76546473                         | 0.456622619                   | -0.033757824                  | 2.937395886                                | 0.401817095                 |
| 22.13863395                         | 0.603440066                   | -0.062533154                  | 3.371173816                                | 0.354525695                 |
| 38.70967021                         | 0.48733241                    | -0.038390275                  | 3.197404771                                | 0.387471953                 |
| 16.90604887                         | 0.601180119                   | -0.065203221                  | 2.896909476                                | 0.384291722                 |
| 22.9043858                          | 0.556994505                   | -0.060046663                  | 2.328994553                                | 0.486687602                 |
| 24.49744434                         | 0.693675643                   | -0.080558214                  | 4.492572495                                | 0.310222604                 |
| 28.67106561                         | 0.566214878                   | -0.049804621                  | 4.070058888                                | 0.325053826                 |
| 28.98110294                         | 0.599149823                   | -0.058265532                  | 3.79428731                                 | 0.341434624                 |
| 24.47167926                         | 0.670662854                   | -0.084516392                  | 3.065822703                                | 0.404172221                 |
| 30.69743913                         | 0.521276405                   | -0.049132966                  | 2.491427079                                | 0.418827009                 |
| 30.49620115                         | 0.491717111                   | -0.037677018                  | 3.289969555                                | 0.365685618                 |
| 33.22596729                         | 0.495083879                   | -0.038102468                  | 3.358464877                                | 0.384778804                 |
| 29.12181043                         | 0.47608117                    | -0.041534421                  | 2.309490324                                | 0.463924733                 |
| 68.72070611                         | 0.595144395                   | -0.073824736                  | 2.058672692                                | 0.514150771                 |
| 14.30161428                         | 0.785405882                   | -0.139370532                  | 2.90811164                                 | 0.386539419                 |
| 27.40858881                         | 0.631439272                   | -0.067013414                  | 3.549340702                                | 0.373296237                 |
| 24.20218753                         | 0.76609584                    | -0.114070756                  | 4.1808547                                  | 0.307708002                 |
| 32.81404518                         | 0.477739314                   | -0.035447085                  | 3.181112687                                | 0.380194782                 |
| 24.14157654                         | 0.666217609                   | -0.080375589                  | 3.384345558                                | 0.349378935                 |
| 26.92068625                         | 0.574247402                   | -0.052652511                  | 3.650397892                                | 0.35995758                  |
| 24.66919051                         | 0.448292492                   | -0.032936275                  | 2.892858757                                | 0.398163005                 |
| 24.34412735                         | 0.531923093                   | -0.04738984                   | 2.906000713                                | 0.382996942                 |
| 24.69819905                         | 0.479382134                   | -0.040705603                  | 2.494951211                                | 0.449707103                 |
| 22.58383822                         | 0.470517022                   | -0.039839182                  | 2.289788487                                | 0.467570472                 |
| 31.39095883                         | 0.470613704                   | -0.035451746                  | 2.997438144                                | 0.41779899                  |
| 30.74701545                         | 0.645924741                   | -0.066356932                  | 4.508020984                                | 0.298076249                 |
| 22.38518758                         | 0.542147606                   | -0.048178044                  | 3.208048316                                | 0.36581295                  |
| 18.08009947                         | 0.642891952                   | -0.073159016                  | 3.40619946                                 | 0.35403432                  |
| 26.17876369                         | 0.496749132                   | -0.04038287                   | 3.132570824                                | 0.377308263                 |
| 22.5947381                          | 0.503202111                   | -0.040555051                  | 3.241079073                                | 0.382103533                 |
| 27.702345                           | 0.749679417                   | -0.107940353                  | 3.788836571                                | 0.335089649                 |
| 33.11571842                         | 0.645976964                   | -0.064158038                  | 5.035931031                                | 0.280218034                 |
| 65.40337491                         | 0.628875371                   | -0.060900882                  | 4.666160451                                | 0.325260941                 |
| 20.93174841                         | 0.904841992                   | -0.24478074                   | 3.096193499                                | 0.374475344                 |
| 22.92222847                         | 0.420904363                   | -0.029231721                  | 2.778314336                                | 0.401541146                 |
| 33.16653156                         | 0.460546893                   | -0.036694712                  | 2.444860811                                | 0.451559465                 |
| 24.32812445                         | 0.590800303                   | -0.060662324                  | 3.059212042                                | 0.370482518                 |
| 28.42919991                         | 0.499427993                   | -0.038252674                  | 3.571476045                                | 0.340027704                 |
| 25.12852843                         | 0.838712205                   | -0.187176491                  | 2.839522676                                | 0.394995956                 |
| 25.54264613                         | 0.947823899                   | -0.32394428                   | 4.319083102                                | 0.321582317                 |
| 48.80506291                         | 0.537642267                   | -0.047250887                  | 3.162671178                                | 0.404242145                 |
| 34.16767106                         | 0.761436008                   | -0.107917173                  | 4.364088159                                | 0.321362525                 |
| 28.78593666                         | 0.714078776                   | -0.097571038                  | 3.255097398                                | 0.402739055                 |
| 26.78391006                         | 0.485696853                   | -0.038613006                  | 2.915820565                                | 0.410704167                 |
| 30.93850112                         | 0.408754319                   | -0.02753499                   | 2.634215704                                | 0.426741382                 |
| 28.27782189                         | 0.926473056                   | -0.232941925                  | 5.131986279                                | 0.284259987                 |
| 35.52737795                         | 0.614061428                   | -0.065530612                  | 3.201171973                                | 0.381200037                 |
| 22.53077573                         | 0.924514551                   | -0.263400248                  | 3.899157365                                | 0.325825014                 |
| 19.29139404                         | 0.693589708                   | -0.09719204                   | 2.732070105                                | 0.395829938                 |
| 20.38206305                         | 0.716758955                   | -0.103113222                  | 3.033237561                                | 0.416234557                 |

| log.sigma.1.0.mm.3D_glcm_ClusterTendency | log.sigma.1.0.mm.3D_firstorder_InterquartileRange | log.sigma.1.0.mm.3D_firstorder_Skewness | log.sigma.1.0.mm.3D_firstorder_Uniformity |
|------------------------------------------|---------------------------------------------------|-----------------------------------------|-------------------------------------------|
| 26.88040418                              | 121.069849                                        | 0.236246115                             | 0.085479379                               |
| 15.99653613                              | 51.51155281                                       | 0.308101321                             | 0.150521949                               |
| 25.39053805                              | 99.20015335                                       | 0.898201243                             | 0.093886046                               |
| 34.88344422                              | 118.257618                                        | 0.235568794                             | 0.075957642                               |
| 15.77590834                              | 87.11909866                                       | -0.031750379                            | 0.118209821                               |
| 16.02424893                              | 91.67256546                                       | -0.03941447                             | 0.104837598                               |
| 14.87925717                              | 59.65102577                                       | -0.973380988                            | 0.143181678                               |
| 29.09175731                              | 127.7588282                                       | -0.08258856                             | 0.078184947                               |
| 23.20528915                              | 106.6480694                                       | 0.037091869                             | 0.088819434                               |
| 19.89818286                              | 80.31727695                                       | 0.34882191                              | 0.110982699                               |
| 14.14326454                              | 91.70326996                                       | -0.069731754                            | 0.107960037                               |
| 25.63652832                              | 95.90919399                                       | 0.00209243                              | 0.094034396                               |
| 13.64592821                              | 82.08664417                                       | 0.264629028                             | 0.115964846                               |
| 12.91063751                              | 80.90867901                                       | 0.122114958                             | 0.117965572                               |
| 18.91965008                              | 95.76539993                                       | -0.179495756                            | 0.100914424                               |
| 9.304353388                              | 23.95371914                                       | 1.006693436                             | 0.240307886                               |
| 16.16492433                              | 95.70459938                                       | 0.060350331                             | 0.104018029                               |
| 14.0665746                               | 73.31873322                                       | 0.320496959                             | 0.122403564                               |
| 20.86883637                              | 100.6444912                                       | -0.137083787                            | 0.094407246                               |
| 9.198327662                              | 44.57583046                                       | 0.220625195                             | 0.173649284                               |
| 13.95353672                              | 61.92035341                                       | 0.499150478                             | 0.135141891                               |
| 17.85241795                              | 89.89701366                                       | 0.391334647                             | 0.103695241                               |
| 11.53041324                              | 70.03728485                                       | 0.355582712                             | 0.138445296                               |
| 25.10031577                              | 106.2642365                                       | -0.176900285                            | 0.088999442                               |
| 12.76861115                              | 70.8786068                                        | 0.678238627                             | 0.124566782                               |
| 19.17720258                              | 89.9753027                                        | -0.018250536                            | 0.097779236                               |
| 13.18286556                              | 52.96883345                                       | 0.190659693                             | 0.150379967                               |
| 17.01439587                              | 69.99102592                                       | 0.603218493                             | 0.11941968                                |
| 23.84475719                              | 109.5201035                                       | -0.085762777                            | 0.087719828                               |
| 13.9116651                               | 50.36243749                                       | 0.545527269                             | 0.155096967                               |
| 14.51670342                              | 63.89605999                                       | 0.757179272                             | 0.13174051                                |
| 9.259418168                              | 53.86926556                                       | 0.53772422                              | 0.164393756                               |
| 28.49455259                              | 109.4179459                                       | 0.098109728                             | 0.085112854                               |
| 31.84956128                              | 93.57752514                                       | -0.259359278                            | 0.095968935                               |
| 29.71563756                              | 132.6395731                                       | -0.236776365                            | 0.076208448                               |
| 16.53195945                              | 88.25011253                                       | -0.077018953                            | 0.105007352                               |
| 24.63056407                              | 91.03408527                                       | 0.473529667                             | 0.108431231                               |
| 18.88452349                              | 93.81795502                                       | 0.017820707                             | 0.100260496                               |
| 14.02543971                              | 82.33216286                                       | -0.242964025                            | 0.114065044                               |
| 24.00883869                              | 110.5730858                                       | 0.090596994                             | 0.087667132                               |
| 19.22304682                              | 76.66738796                                       | 0.163247548                             | 0.114716598                               |
| 19.93916827                              | 98.23617935                                       | 0.010807294                             | 0.095785221                               |
| 20.99521328                              | 101.5751181                                       | -0.174636311                            | 0.093521759                               |
| 23.83521149                              | 102.5531883                                       | 0.042890816                             | 0.089008923                               |
| 22.71299102                              | 104.3384066                                       | -0.080488799                            | 0.091269801                               |
| 14.02507241                              | 73.21897507                                       | 0.518145381                             | 0.123268729                               |
| 28.18280942                              | 110.8664455                                       | -0.05553091                             | 0.082932262                               |
| 20.35097399                              | 107.6575375                                       | 0.046041867                             | 0.091638741                               |
| 20.04283567                              | 75.25961781                                       | -0.864938481                            | 0.130875473                               |
| 22.09049456                              | 100.5933037                                       | -0.360070282                            | 0.096875013                               |
| 17.08048271                              | 78.91108131                                       | 0.239771889                             | 0.113401518                               |
| 20.3550421                               | 104.9014835                                       | -0.146702647                            | 0.092791796                               |
| 17.99015055                              | 78.9883728                                        | 0.105632184                             | 0.11421235                                |
| 15.28291054                              | 82.80972672                                       | 0.105188584                             | 0.110710288                               |
| 13.81902237                              | 36.58287525                                       | 0.412755887                             | 0.188067017                               |
| 36.10994002                              | 136.1093483                                       | -0.085147047                            | 0.071089937                               |
| 31.68037547                              | 131.4935913                                       | 0.06395464                              | 0.074736201                               |
| 27.47973932                              | 93.85624695                                       | -0.506132569                            | 0.093864338                               |
| 19.54322905                              | 77.16687202                                       | 0.013477278                             | 0.11329679                                |
| 12.35105788                              | 77.82530975                                       | -0.227206116                            | 0.123779731                               |
| 21.13568922                              | 98.86021423                                       | 0.059902128                             | 0.095506375                               |
| 22.75463836                              | 87.83608818                                       | 0.349508593                             | 0.105840002                               |
| 11.63108874                              | 52.31823397                                       | 0.109507763                             | 0.16036447                                |
| 12.12610551                              | 37.62743473                                       | -2.173209618                            | 0.182696574                               |
| 16.81597386                              | 90.12425995                                       | 0.007969377                             | 0.105990783                               |
| 25.86010483                              | 89.16825104                                       | 0.183243405                             | 0.097040437                               |
| 28.06644985                              | 130.419405                                        | -0.350387617                            | 0.080136051                               |
| 21.07886049                              | 92.39042282                                       | 0.024943191                             | 0.101521416                               |
| 20.10377639                              | 108.9111023                                       | -0.306181311                            | 0.091717107                               |
| 26.26692672                              | 96.37868881                                       | 0.235830418                             | 0.096536924                               |
| 17.33835774                              | 82.70676899                                       | 0.282825067                             | 0.109735111                               |
| 16.98285928                              | 91.23344803                                       | -0.058283603                            | 0.104467846                               |
| 13.81037421                              | 60.29098272                                       | 0.438376045                             | 0.141777304                               |
| 11.98140614                              | 51.86003494                                       | 0.420906651                             | 0.154237558                               |
| 19.12274449                              | 66.37227106                                       | 0.126447159                             | 0.124845454                               |
| 33.75027991                              | 131.901993                                        | -0.18521491                             | 0.073293637                               |
| 19.2802779                               | 99.22463226                                       | 0.109533341                             | 0.096051981                               |
| 20.7217229                               | 118.4742804                                       | 0.082134725                             | 0.087890352                               |
| 19.14744152                              | 103.3343353                                       | -0.014729685                            | 0.095729789                               |
| 20.84041442                              | 94.32499313                                       | 0.342820283                             | 0.101438124                               |
| 27.04070214                              | 122.004735                                        | -0.005857091                            | 0.080892542                               |
| 40.79535296                              | 157.3333359                                       | -0.190966313                            | 0.064544418                               |
| 41.01782565                              | 101.7827711                                       | -0.153373318                            | 0.086476096                               |
| 21.53280802                              | 78.2519455                                        | -0.457955009                            | 0.11705113                                |
| 15.21729103                              | 81.32749748                                       | 0.208463393                             | 0.116215917                               |
| 12.8021449                               | 58.12575626                                       | 0.508937879                             | 0.146365894                               |
| 18.02816017                              | 102.3969498                                       | 0.076747697                             | 0.096460504                               |
| 24.56713867                              | 111.3451347                                       | -0.294580802                            | 0.086282914                               |
| 14.29385951                              | 74.56673622                                       | -0.458663329                            | 0.118934576                               |
| 31.93531553                              | 85.06760025                                       | -1.183620403                            | 0.117823129                               |
| 21.51773358                              | 75.38916397                                       | -0.594560917                            | 0.114900708                               |
| 32.7758513                               | 126.5245619                                       | 0.292091098                             | 0.076595591                               |
| 21.40286486                              | 84.65668201                                       | 0.126210641                             | 0.107760387                               |
| 17.37841002                              | 75.72820568                                       | 0.271076573                             | 0.115618032                               |
| 14.42335493                              | 65.94449568                                       | 0.343392099                             | 0.131444018                               |
| 48.78391786                              | 165.0420609                                       | 0.124407806                             | 0.062100642                               |
| 21.21461937                              | 86.39519978                                       | -0.926168702                            | 0.106510236                               |
| 27.84519533                              | 99.28464699                                       | -0.409467824                            | 0.09220702                                |
| 15.81490908                              | 79.64340973                                       | -0.097312054                            | 0.117856322                               |
| 21.68834703                              | 74.13803864                                       | 0.832115804                             | 0.108380973                               |

| log.sigma.1.0.mm.3D_firstorder_MeanAbsoluteDeviation | log.sigma.1.0.mm.3D_firstorder_Energy | log.sigma.1.0.mm.3D_firstorder_RobustMeanAbsoluteDeviation | log.sigma.1.0.mm.3D_firstorder_Median |
|------------------------------------------------------|---------------------------------------|------------------------------------------------------------|---------------------------------------|
| 68.7847252                                           | 5569046.681                           | 46.74277807                                                | -3.515545964                          |
| 45.52821453                                          | 9210302.866                           | 25.15116946                                                | -2.59798193                           |
| 67.01476029                                          | 3533801.9                             | 41.9124698                                                 | -13.42527199                          |
| 77.20806362                                          | 27421695.67                           | 50.0367126                                                 | -0.903671086                          |
| 51.14772274                                          | 1552448.084                           | 35.16598885                                                | 7.865713596                           |
| 55.51774637                                          | 3091643.881                           | 38.99722724                                                | 0.171034127                           |
| 45.25787449                                          | 1318108.607                           | 27.13293125                                                | 7.170198441                           |
| 72.7238145                                           | 8083604.532                           | 51.95357933                                                | 2.216866255                           |
| 63.90487089                                          | 13730876.02                           | 43.8881072                                                 | -3.333771944                          |
| 55.46593027                                          | 18168701.54                           | 33.96032515                                                | -7.105432749                          |
| 52.36117623                                          | 3465468.081                           | 37.42237402                                                | -2.851959705                          |
| 67.08510268                                          | 12786015.29                           | 41.36249328                                                | -6.567647696                          |
| 49.46161684                                          | 8304079.847                           | 33.81655243                                                | -0.089673281                          |
| 48.18261513                                          | 4034244.436                           | 33.80775323                                                | -1.2708354                            |
| 57.61651806                                          | 4968557.782                           | 39.45162321                                                | 3.192606211                           |
| 29.41194206                                          | 16746249.53                           | 12.79709967                                                | -1.973119497                          |
| 54.38470077                                          | 3160808.005                           | 38.88602105                                                | -0.124927361                          |
| 47.01636841                                          | 8874184.143                           | 30.82829008                                                | -1.822628796                          |
| 60.09988614                                          | 3278263.004                           | 41.96355296                                                | 11.46801138                           |
| 34.86486163                                          | 6884736.544                           | 20.3151048                                                 | -1.582080245                          |
| 46.97504068                                          | 22652622.56                           | 28.01473206                                                | -7.032027006                          |
| 55.31867683                                          | 8796411.837                           | 37.3807179                                                 | -0.886147976                          |
| 43.79062005                                          | 9506041.75                            | 28.71727242                                                | -6.647801876                          |
| 66.38358918                                          | 3549973.191                           | 44.37240349                                                | 11.49244499                           |
| 48.54765312                                          | 5221895.126                           | 30.87343763                                                | -12.26765823                          |
| 59.35489915                                          | 4283512.503                           | 38.86967301                                                | -6.363702536                          |
| 42.82137527                                          | 13292426.42                           | 24.36878805                                                | -3.85844259                           |
| 52.77176808                                          | 7684735.382                           | 31.73126955                                                | -12.00756359                          |
| 64.1280072                                           | 11608366.53                           | 44.37245345                                                | 4.621932507                           |
| 43.3749735                                           | 10524107.86                           | 23.8972571                                                 | -4.743706703                          |
| 48.08494793                                          | 14178600.78                           | 29.21001644                                                | -10.35641098                          |
| 36.4800904                                           | 14477208.89                           | 22.90294519                                                | -2.684626341                          |
| 68.06631518                                          | 16365749.04                           | 44.90854098                                                | 0.739631712                           |
| 68.92363354                                          | 888900.8555                           | 42.17445452                                                | 18.60025215                           |
| 76.40172857                                          | 2997190.564                           | 53.67652566                                                | 15.23779583                           |
| 53.33189656                                          | 9188194.513                           | 36.81853793                                                | -1.842839539                          |
| 60.80522437                                          | 20273555.8                            | 37.36623384                                                | -5.222795486                          |
| 59.22466508                                          | 20480393.66                           | 38.70140374                                                | -4.737778902                          |
| 49.82491637                                          | 3237651.532                           | 35.23278338                                                | 9.558925629                           |
| 64.8279685                                           | 7355917.331                           | 44.03976579                                                | -2.024813175                          |
| 55.04620087                                          | 8592712.079                           | 33.14197755                                                | -2.65998619                           |
| 59.20555759                                          | 5259310.212                           | 41.34252068                                                | -1.478240252                          |
| 60.57857025                                          | 9517582.19                            | 42.26072585                                                | 1.62615478                            |
| 63.99630905                                          | 6965268.533                           | 43.11239614                                                | 2.521220922                           |
| 63.1604283                                           | 12178546.41                           | 43.49281881                                                | 1.539634109                           |
| 48.98306551                                          | 9690727.898                           | 31.1027089                                                 | -4.725713015                          |
| 70.48857213                                          | 37512795.52                           | 45.87313852                                                | -0.497693107                          |
| 63.05733078                                          | 3621070.545                           | 44.38413352                                                | -4.152022839                          |
| 51.24206441                                          | 647757.9007                           | 30.04498254                                                | 17.3940897                            |
| 61.81763704                                          | 3075780.884                           | 42.60966292                                                | 12.46114922                           |
| 52.04775078                                          | 16726708.42                           | 33.08457221                                                | -2.17212081                           |
| 60.98156165                                          | 4733345.69                            | 43.73516279                                                | 1.117473841                           |
| 53.58896791                                          | 20310958.24                           | 33.77257955                                                | -2.026995897                          |
| 51.61625684                                          | 2598327.093                           | 34.91407925                                                | 4.134244919                           |
| 38.40252538                                          | 22322613.15                           | 19.39492894                                                | -1.758311987                          |
| 80.56798402                                          | 9267527.425                           | 54.99880785                                                | -0.547315359                          |
| 75.4208609                                           | 19368113.47                           | 53.55772918                                                | 0.733781159                           |
| 65.21032163                                          | 9648727.87                            | 41.68799246                                                | 13.02968121                           |
| 55.84916684                                          | 4931673.124                           | 33.60534941                                                | -1.119470477                          |
| 47.72173284                                          | 3385367.286                           | 32.44440048                                                | -7.232517719                          |
| 59.91813443                                          | 12804412.42                           | 40.21212441                                                | -5.224727631                          |
| 57.56356081                                          | 33942420.97                           | 35.80982563                                                | -2.399381995                          |
| 40.69207558                                          | 10282628.54                           | 23.90764969                                                | -2.430134296                          |
| 35.85354645                                          | 8834284.417                           | 19.20649456                                                | -0.760728419                          |
| 54.17153556                                          | 996183.0012                           | 37.39510222                                                | -0.008989785                          |
| 61.31924002                                          | 10700200.03                           | 38.45807443                                                | 3.00950098                            |
| 73.81450928                                          | 3213748.093                           | 53.53583918                                                | 6.041554689                           |
| 56.92077491                                          | 17874364.58                           | 37.73821479                                                | -1.935112476                          |
| 62.60960074                                          | 2721105.537                           | 44.11493172                                                | -0.664885953                          |
| 63.07639786                                          | 14517925.85                           | 40.22175888                                                | -4.297996521                          |
| 53.61533191                                          | 15026059.86                           | 35.09870285                                                | -6.566716433                          |
| 53.92148473                                          | 5323810.316                           | 37.18506265                                                | -2.148670197                          |
| 43.89138636                                          | 20092587.46                           | 25.89459473                                                | -3.42459483                           |
| 40.84305812                                          | 22655969.53                           | 23.99949802                                                | -5.188551426                          |
| 51.37718023                                          | 49239169.43                           | 29.74410842                                                | -0.283059776                          |
| 78.20391085                                          | 10946601.37                           | 54.29714391                                                | 4.574894667                           |
| 59.0351902                                           | 6139146.198                           | 41.38464586                                                | -3.254758835                          |
| 64.64772851                                          | 3856572.689                           | 46.91382583                                                | -7.866613388                          |
| 59.01750882                                          | 9830750.083                           | 41.27138181                                                | -7.77640605                           |
| 58.5746307                                           | 17319984.59                           | 38.16540509                                                | -5.387197733                          |
| 72.46804452                                          | 4383323.456                           | 49.32225682                                                | -8.778933525                          |
| 88.91663347                                          | 16363029.52                           | 63.19410009                                                | 6.372058868                           |
| 72.83067917                                          | 28757494.06                           | 44.51458885                                                | 2.861073375                           |
| 53.02821777                                          | 776218.2015                           | 32.08099497                                                | 13.11985588                           |
| 50.63213439                                          | 14818669.83                           | 33.46733576                                                | -4.689043522                          |
| 41.87537367                                          | 19536948.47                           | 25.08930783                                                | -3.199166656                          |
| 58.71160479                                          | 4201439.258                           | 41.516907                                                  | -6.696150303                          |
| 66.10553559                                          | 10390037.17                           | 47.02379952                                                | 5.206068993                           |
| 50.83653205                                          | 851288.4135                           | 32.55910042                                                | 5.516653061                           |
| 71.15473238                                          | 968715.5474                           | 41.65506834                                                | 12.4649992                            |
| 54.39492346                                          | 23259301.79                           | 33.2031347                                                 | 0.624271333                           |
| 78.06153639                                          | 7599094.91                            | 50.88581784                                                | -8.290821552                          |
| 57.87144519                                          | 6469070.958                           | 35.78421962                                                | -3.110012174                          |
| 51.81813144                                          | 20882193.54                           | 32.19906362                                                | -3.191678166                          |
| 46.78286699                                          | 24146401.73                           | 28.67202846                                                | -5.0368433                            |
| 95.9201582                                           | 3688939.995                           | 66.4255025                                                 | -10.44027138                          |
| 57.23770386                                          | 7569262.674                           | 36.27857438                                                | 9.455837727                           |
| 65.75393276                                          | 832197.9038                           | 45.1238                                                    | 21.03912735                           |
| 49.94088631                                          | 1687633.705                           | 32.88412354                                                | 10.87495422                           |
| 59.70123353                                          | 5761046.107                           | 34.83100342                                                | -8.140844345                          |

| log.sigma.1.0.mm.3D_firstorder_TotalEnergy | log.sigma.1.0.mm.3D_firstorder_Maximum | log.sigma.1.0.mm.3D_firstorder_RootMeanSquared | log.sigma.1.0.mm.3D_firstorder_90Percentile | log.sigma.1.0.mm.3D_firstorder_Minimum |
|--------------------------------------------|----------------------------------------|------------------------------------------------|---------------------------------------------|----------------------------------------|
| 150364260.4                                | 326.4738159                            | 88.81535962                                    | 120.6937637                                 | -236.6236267                           |
| 248678177.4                                | 259.5122375                            | 66.59148617                                    | 86.83833466                                 | -287.6069641                           |
| 95412651.3                                 | 338.8181763                            | 90.23525193                                    | 116.2835968                                 | -189.839386                            |
| 740385783.1                                | 421.9231262                            | 102.1013311                                    | 136.5555603                                 | -401.5019531                           |
| 41916098.27                                | 257.7886353                            | 65.75992641                                    | 71.85844574                                 | -193.7762909                           |
| 83474384.77                                | 227.1506805                            | 69.34086339                                    | 80.92660522                                 | -263.7724609                           |
| 35588932.38                                | 173.5493164                            | 62.54039897                                    | 71.23403778                                 | -295.3369141                           |
| 218257322.4                                | 283.7646179                            | 89.8190937                                     | 113.1858879                                 | -330.4884033                           |
| 370733652.6                                | 288.2227173                            | 81.26843157                                    | 95.83958435                                 | -306.8320313                           |
| 490554941.7                                | 368.3067322                            | 76.58103626                                    | 95.86722183                                 | -351.170166                            |
| 93567638.18                                | 189.7084808                            | 64.733367                                      | 81.5347641                                  | -226.9589539                           |
| 345222412.9                                | 374.8396301                            | 92.88455568                                    | 119.9622475                                 | -473.4546204                           |
| 224210155.9                                | 333.2625732                            | 63.27634455                                    | 80.3700737                                  | -227.7536316                           |
| 108924599.8                                | 188.7028351                            | 60.07035556                                    | 82.42950134                                 | -182.9682922                           |
| 134151060.1                                | 259.9291382                            | 73.85093258                                    | 92.40156555                                 | -295.3594971                           |
| 452148737.4                                | 377.4447327                            | 49.09758489                                    | 54.19236069                                 | -242.6296997                           |
| 85341816.15                                | 198.3512115                            | 67.29322575                                    | 81.72988205                                 | -164.2218323                           |
| 239602971.9                                | 255.1088257                            | 61.68789418                                    | 83.07784805                                 | -243.4195099                           |
| 88513101.12                                | 225.6975098                            | 75.05167755                                    | 102.6247704                                 | -216.8082275                           |
| 185887886.7                                | 211.0540619                            | 49.57778372                                    | 65.63038635                                 | -207.12146                             |
| 611620809.1                                | 342.3471985                            | 65.8502852                                     | 87.26931076                                 | -288.8267822                           |
| 237503119.6                                | 360.4595032                            | 71.51358562                                    | 94.72451019                                 | -322.6191406                           |
| 244513127.2                                | 213.5836639                            | 57.58486565                                    | 79.64279175                                 | -231.0940094                           |
| 95849276.15                                | 282.9072571                            | 85.90926402                                    | 107.8473587                                 | -289.1957397                           |
| 140991168.4                                | 367.6116638                            | 65.85683106                                    | 82.30544662                                 | -196.0982819                           |
| 115654837.6                                | 225.4608002                            | 78.56340253                                    | 97.28634109                                 | -284.5653992                           |
| 358895513.3                                | 261.0152283                            | 61.92811391                                    | 77.09740829                                 | -383.2192993                           |
| 207487855.3                                | 323.8140259                            | 73.23039278                                    | 92.48640137                                 | -305.2008057                           |
| 313425896.2                                | 249.5481567                            | 81.0985709                                     | 110.1845474                                 | -261.9757385                           |
| 284150912.3                                | 333.0279236                            | 64.34352834                                    | 71.70883713                                 | -277.7818604                           |
| 382822221                                  | 374.0120239                            | 66.78384558                                    | 84.3072113                                  | -239.9323578                           |
| 390884639.9                                | 289.9638062                            | 49.410025                                      | 66.84995346                                 | -187.588501                            |
| 441875224                                  | 412.6047974                            | 89.7220637                                     | 116.1272507                                 | -317.8501892                           |
| 24000323.1                                 | 303.9506531                            | 92.450655                                      | 97.97199402                                 | -248.8558502                           |
| 80924145.24                                | 245.3605347                            | 95.01411697                                    | 113.6593216                                 | -270.1303711                           |
| 248081251.8                                | 289.1698608                            | 67.44339215                                    | 85.55717239                                 | -273.1610107                           |
| 547386006.5                                | 374.0306091                            | 83.90130569                                    | 114.3738441                                 | -296.7173462                           |
| 552970628.8                                | 295.2103882                            | 78.14255748                                    | 107.5314423                                 | -489.9978333                           |
| 87416591.37                                | 192.9204102                            | 62.26898895                                    | 80.45292664                                 | -192.5306549                           |
| 198609767.9                                | 325.1104736                            | 83.73956023                                    | 102.3526672                                 | -336.7580566                           |
| 232003226.1                                | 255.5259552                            | 76.35129159                                    | 101.9132454                                 | -291.4646606                           |
| 142001375.1                                | 224.2409821                            | 74.28787637                                    | 90.93886108                                 | -250.3433685                           |
| 256974719.1                                | 255.5943756                            | 76.13366583                                    | 91.92648697                                 | -298.5834961                           |
| 188062250.4                                | 321.9518127                            | 82.43411875                                    | 102.7765411                                 | -271.8645935                           |
| 328820753.2                                | 339.7957764                            | 80.52856012                                    | 91.66882706                                 | -353.7709656                           |
| 261649653.3                                | 338.9518127                            | 65.95088176                                    | 87.01549911                                 | -213.3900757                           |
| 1012845479                                 | 389.7598572                            | 79.77331936                                    | 120.4232521                                 | -496.1364136                           |
| 97768904.71                                | 257.6603088                            | 78.81052407                                    | 99.09143677                                 | -293.4429016                           |
| 17489463.32                                | 189.8556671                            | 69.52707519                                    | 70.80809784                                 | -205.6280212                           |
| 83046083.86                                | 260.5482788                            | 78.66825237                                    | 91.29398499                                 | -322.6687012                           |
| 451621127.3                                | 304.8114014                            | 69.89375368                                    | 88.10516357                                 | -307.7781372                           |
| 127800333.6                                | 286.156311                             | 75.65390625                                    | 92.44640198                                 | -252.3696899                           |
| 548395872.5                                | 362.1268311                            | 72.9082523                                     | 94.68926239                                 | -452.410614                            |
| 70154831.5                                 | 225.4571533                            | 66.30605208                                    | 81.69522858                                 | -190.7958527                           |
| 602710555                                  | 313.1870117                            | 58.49905186                                    | 74.50881348                                 | -253.0995331                           |
| 250223240.5                                | 312.6438904                            | 102.6803883                                    | 119.0152573                                 | -285.99823                             |
| 522939063.6                                | 356.1984253                            | 93.97759885                                    | 119.983638                                  | -349.598999                            |
| 260515652.5                                | 250.4084473                            | 86.38448859                                    | 100.7429626                                 | -341.0227051                           |
| 133155174.3                                | 393.4310608                            | 77.83679394                                    | 92.52784042                                 | -293.821106                            |
| 91404916.73                                | 180.5582123                            | 61.98904453                                    | 74.24197388                                 | -359.7368469                           |
| 345719135.4                                | 278.2150879                            | 77.73459652                                    | 100.0590759                                 | -370.9819336                           |
| 916445366.2                                | 381.6216736                            | 78.71552454                                    | 101.08479                                   | -391.5099487                           |
| 277630970.7                                | 230.8786621                            | 57.68631989                                    | 80.31548386                                 | -342.4170532                           |
| 238525679.3                                | 222.0974426                            | 56.87544904                                    | 67.34324646                                 | -835.5252686                           |
| 26896941.03                                | 169.4927063                            | 67.75474208                                    | 80.87118378                                 | -165.9848938                           |
| 288905400.7                                | 332.3505554                            | 83.00614034                                    | 113.4771469                                 | -302.2910767                           |
| 86771198.52                                | 204.8514404                            | 90.3145672                                     | 107.1534622                                 | -279.6328125                           |
| 482607843.5                                | 339.5298157                            | 74.77285921                                    | 97.40058746                                 | -386.8225098                           |
| 73469849.5                                 | 201.9100189                            | 78.10975286                                    | 89.88027573                                 | -293.684906                            |
| 391983997.9                                | 401.9299316                            | 84.96621099                                    | 110.934288                                  | -316.1313171                           |
| 405703616.2                                | 263.9413452                            | 70.30492763                                    | 96.48260345                                 | -292.192627                            |
| 143742878.5                                | 265.0117188                            | 68.66956808                                    | 80.96649475                                 | -276.5820923                           |
| 542499861.4                                | 348.805481                             | 62.35290346                                    | 80.69449539                                 | -296.0680847                           |
| 611711177.3                                | 460.5213013                            | 58.08125371                                    | 72.39007187                                 | -250.2889404                           |
| 1329457575                                 | 364.7881165                            | 73.23758561                                    | 91.37892914                                 | -368.916687                            |
| 295558236.9                                | 430.7009583                            | 99.03929819                                    | 113.3289185                                 | -354.9748535                           |
| 165756947.4                                | 257.6763611                            | 74.1357015                                     | 87.12454834                                 | -255.8598938                           |
| 104127462.6                                | 238.6211395                            | 79.51257957                                    | 98.83145523                                 | -215.7497406                           |
| 265430252.3                                | 237.1099091                            | 74.65244521                                    | 88.83230896                                 | -304.702301                            |
| 467639583.8                                | 381.0135498                            | 78.01108222                                    | 98.39716339                                 | -260.2354736                           |
| 118349733.3                                | 266.0545044                            | 93.25808464                                    | 104.9161621                                 | -347.4962158                           |
| 441801797.1                                | 381.166626                             | 110.4631613                                    | 138.7572021                                 | -385.2685547                           |
| 776452339.7                                | 411.505188                             | 101.4887287                                    | 130.2460648                                 | -798.3779907                           |
| 20957891.44                                | 175.8780823                            | 73.16576369                                    | 91.43540039                                 | -235.3846588                           |
| 400104085.3                                | 300.2729187                            | 66.10597513                                    | 90.17012024                                 | -258.2454529                           |
| 527497608.7                                | 419.2432556                            | 59.73056816                                    | 71.67055893                                 | -398.9732971                           |
| 113438860                                  | 228.3544617                            | 73.48678473                                    | 94.48077698                                 | -293.1192017                           |
| 280531003.5                                | 228.1306763                            | 81.82060607                                    | 97.09305038                                 | -340.8970337                           |
| 22984787.16                                | 153.7989807                            | 68.20446653                                    | 101.567453                                  | -294.8937683                           |
| 26155319.78                                | 191.2843933                            | 96.0513527                                     | 86.13004608                                 | -319.1911926                           |
| 628001148.4                                | 299.3508301                            | 76.49442252                                    | 94.13664398                                 | -575.2572021                           |
| 205175562.6                                | 366.1729431                            | 103.7477254                                    | 132.1421814                                 | -411.5518799                           |
| 174664915.9                                | 314.1782227                            | 79.56013466                                    | 101.2237915                                 | -327.081665                            |
| 563819225.5                                | 388.1687317                            | 71.45397674                                    | 87.51284637                                 | -319.4147949                           |
| 651952846.7                                | 421.0682068                            | 64.48930479                                    | 84.42108536                                 | -354.4888306                           |
| 99601379.86                                | 322.7593384                            | 120.7509441                                    | 150.9944153                                 | -337.0453491                           |
| 204370092.2                                | 330.5661316                            | 78.89691118                                    | 88.70155334                                 | -415.4638977                           |
| 22469343.4                                 | 172.217926                             | 82.25470574                                    | 109.922261                                  | -252.6218872                           |
| 45566110.03                                | 263.0257874                            | 66.72974883                                    | 78.78020172                                 | -217.8908997                           |
| 155548244.9                                | 355.5436096                            | 84.49167273                                    | 106.9049988                                 | -245.7881622                           |

| log.sigma.1.0.mm.3D_firstorder_Entropy | log.sigma.1.0.mm.3D_firstorder_StandardDeviation | log.sigma.1.0.mm.3D_firstorder_Range | log.sigma.1.0.mm.3D_firstorder_Variance | log.sigma.1.0.mm.3D_firstorder_10Percentile |
|----------------------------------------|--------------------------------------------------|--------------------------------------|-----------------------------------------|---------------------------------------------|
| 3.832806931                            | 88.81514372                                      | 563.0974426                          | 7888.129754                             | -106.8805008                                |
| 3.277881896                            | 66.59135063                                      | 547.1192017                          | 4434.407978                             | -78.35632324                                |
| 3.755384336                            | 90.23524222                                      | 528.6575623                          | 8142.398938                             | -104.1279427                                |
| 4.041073134                            | 101.8584391                                      | 823.4250793                          | 10375.14161                             | -117.1728165                                |
| 3.359885852                            | 65.70273079                                      | 451.5649261                          | 4316.848833                             | -82.14906921                                |
| 3.493587084                            | 69.18524072                                      | 490.9231415                          | 4786.597533                             | -94.48829651                                |
| 3.186195907                            | 62.52631023                                      | 468.8862305                          | 3909.539471                             | -73.23211517                                |
| 3.879658922                            | 89.81848911                                      | 614.2530212                          | 8067.360987                             | -118.1456451                                |
| 3.742473229                            | 81.19867445                                      | 595.0547485                          | 6593.224732                             | -106.0687103                                |
| 3.574028543                            | 76.54534142                                      | 719.4768982                          | 5859.189293                             | -87.71339874                                |
| 3.410808791                            | 64.62506495                                      | 416.6674347                          | 4176.399019                             | -85.63696899                                |
| 3.82916261                             | 92.8671249                                       | 848.2942505                          | 8624.302887                             | -103.9575958                                |
| 3.364935141                            | 63.20247695                                      | 561.0162048                          | 3994.553092                             | -72.80164795                                |
| 3.309727144                            | 60.02875734                                      | 371.6711273                          | 3603.451708                             | -70.76535034                                |
| 3.574400068                            | 73.77421289                                      | 555.2886353                          | 5442.634488                             | -85.54203033                                |
| 2.685242412                            | 49.09063325                                      | 620.0744324                          | 2409.890273                             | -46.37813568                                |
| 3.452382985                            | 67.27819003                                      | 362.5730438                          | 4526.354853                             | -90.23644791                                |
| 3.330974288                            | 61.66823819                                      | 498.5283356                          | 3802.971602                             | -73.3247757                                 |
| 3.620348691                            | 74.88990555                                      | 442.5057373                          | 5608.497954                             | -94.35860214                                |
| 2.956734557                            | 49.56890674                                      | 418.1755219                          | 2457.076515                             | -57.69937071                                |
| 3.336034805                            | 65.76958888                                      | 631.1739807                          | 4325.638821                             | -78.51089401                                |
| 3.536488304                            | 71.38948306                                      | 683.0786438                          | 5096.458291                             | -78.98914261                                |
| 3.199734353                            | 57.572029                                        | 444.6776733                          | 3314.538523                             | -69.28206635                                |
| 3.785842588                            | 85.82056132                                      | 572.1029968                          | 7365.168746                             | -109.3288193                                |
| 3.349931409                            | 65.44474907                                      | 563.7099457                          | 4283.015181                             | -82.72473984                                |
| 3.658422345                            | 78.45015251                                      | 510.0261993                          | 6154.426429                             | -101.5129768                                |
| 3.220777089                            | 61.92250403                                      | 644.2345276                          | 3834.396506                             | -71.13327408                                |
| 3.481308591                            | 73.04269493                                      | 629.0148315                          | 5335.235283                             | -87.40528564                                |
| 3.738612705                            | 80.90199953                                      | 511.5238953                          | 6545.133528                             | -94.9523376                                 |
| 3.227138762                            | 64.145915                                        | 610.8097839                          | 4114.698411                             | -79.98978729                                |
| 3.34940423                             | 66.63180483                                      | 613.9443817                          | 4439.797415                             | -81.21821136                                |
| 2.976918054                            | 49.34605208                                      | 477.5523071                          | 2435.032856                             | -54.43654289                                |
| 3.859361485                            | 89.6936647                                       | 730.4549866                          | 8044.953487                             | -109.7862427                                |
| 3.73554495                             | 92.24370284                                      | 552.8065033                          | 8508.900713                             | -125.2269264                                |
| 3.917039614                            | 94.91174646                                      | 515.4909058                          | 9008.239617                             | -114.1382027                                |
| 3.477670203                            | 67.43478995                                      | 562.3308716                          | 4547.450895                             | -89.59985046                                |
| 3.670010729                            | 83.89748375                                      | 670.7479553                          | 7038.78778                              | -99.3721155                                 |
| 3.643114904                            | 78.13389109                                      | 785.2082214                          | 6104.904936                             | -90.04369431                                |
| 3.352320338                            | 62.12025682                                      | 385.4510651                          | 3858.926307                             | -76.71163025                                |
| 3.73371158                             | 83.73381996                                      | 661.8685303                          | 7011.352605                             | -105.670437                                 |
| 3.563541654                            | 76.3489223                                       | 546.9906158                          | 5829.157936                             | -93.79880905                                |
| 3.614262859                            | 74.26259695                                      | 474.5843506                          | 5514.933305                             | -96.26398163                                |
| 3.641806726                            | 76.10507429                                      | 554.1778717                          | 5791.982333                             | -104.3642067                                |
| 3.751559007                            | 82.42509987                                      | 593.8164063                          | 6793.897088                             | -102.9849655                                |
| 3.714796011                            | 80.47330042                                      | 693.5667419                          | 6475.95208                              | -108.0118553                                |
| 3.38507079                             | 65.95085061                                      | 552.3418884                          | 4349.514696                             | -78.09243774                                |
| 3.919942967                            | 93.72233404                                      | 885.8962708                          | 8783.875897                             | -108.3297195                                |
| 3.667843436                            | 78.7496437                                       | 551.1032104                          | 6201.506382                             | -98.02556763                                |
| 3.329351422                            | 69.50200801                                      | 395.4836884                          | 4830.529118                             | -92.55568085                                |
| 3.620594486                            | 78.63612542                                      | 583.21698                            | 6183.640222                             | -110.4848206                                |
| 3.491764949                            | 69.89372724                                      | 612.5895386                          | 4885.133108                             | -87.1159462                                 |
| 3.622235989                            | 75.49983626                                      | 538.526001                           | 5700.225276                             | -107.2367233                                |
| 3.524827014                            | 72.90821074                                      | 814.5374451                          | 5315.607194                             | -91.75138909                                |
| 3.443302636                            | 66.23917961                                      | 416.253006                           | 4387.628915                             | -83.04242706                                |
| 3.026228252                            | 58.48196955                                      | 566.2865448                          | 3420.140762                             | -64.55400391                                |
| 4.058086348                            | 102.6424945                                      | 598.6421204                          | 10535.48168                             | -139.6866974                                |
| 3.959500565                            | 93.97407198                                      | 705.7974243                          | 8831.126204                             | -119.0723007                                |
| 3.760386939                            | 86.32726978                                      | 591.4311523                          | 7452.397507                             | -119.3375839                                |
| 3.57064993                             | 77.81376115                                      | 687.2521667                          | 6054.981424                             | -95.04199295                                |
| 3.295409562                            | 61.9845682                                       | 540.2950592                          | 3842.086695                             | -71.36431885                                |
| 3.67011373                             | 77.70836502                                      | 649.1970215                          | 6038.589994                             | -98.4754779                                 |
| 3.632076964                            | 78.69729907                                      | 773.1316223                          | 6193.264881                             | -93.97139969                                |
| 3.116927194                            | 57.58108427                                      | 573.2957153                          | 3315.581266                             | -60.1701651                                 |
| 2.968848286                            | 56.87268488                                      | 1057.622711                          | 3234.502285                             | -64.00563812                                |
| 3.452593282                            | 67.75465611                                      | 335.4776001                          | 4590.693425                             | -89.25941315                                |
| 3.725693403                            | 82.73637244                                      | 634.6416321                          | 6845.307324                             | -92.04859467                                |
| 3.840720945                            | 90.24785753                                      | 484.4842529                          | 8144.675789                             | -126.9765648                                |
| 3.603188355                            | 74.77262124                                      | 726.3523254                          | 5590.945021                             | -92.08353424                                |
| 3.655834756                            | 77.97251959                                      | 495.5949249                          | 6079.713812                             | -109.7754974                                |
| 3.748898918                            | 84.96363988                                      | 718.0612488                          | 7218.820102                             | -100.800827                                 |
| 3.498561057                            | 70.29787075                                      | 556.1339722                          | 4941.790632                             | -83.62852478                                |
| 3.498500972                            | 68.59703015                                      | 541.593811                           | 4705.552545                             | -91.4966507                                 |
| 3.26643888                             | 62.35249497                                      | 644.8735657                          | 3887.83363                              | -71.31642761                                |
| 3.153494622                            | 58.00364686                                      | 710.8102417                          | 3364.423049                             | -71.15678787                                |
| 3.482354052                            | 73.19724094                                      | 733.7048035                          | 5357.836082                             | -81.89497299                                |
| 4.00806549                             | 98.99709099                                      | 785.6758118                          | 9800.424025                             | -130.5530701                                |
| 3.607699293                            | 74.06065582                                      | 513.5362549                          | 5484.98074                              | -98.20083771                                |
| 3.689638688                            | 79.27854955                                      | 454.3708801                          | 6285.088419                             | -107.247036                                 |
| 3.615309083                            | 74.41133192                                      | 541.8122101                          | 5537.046319                             | -97.24811783                                |
| 3.643889737                            | 77.97766621                                      | 641.2490234                          | 6080.516428                             | -99.72520447                                |
| 3.895702639                            | 92.90313153                                      | 613.5507202                          | 8630.991848                             | -118.4428467                                |
| 4.16705649                             | 110.4342769                                      | 766.4351807                          | 12195.72951                             | -141.0613403                                |
| 3.959462231                            | 101.3097604                                      | 1209.883179                          | 10263.66755                             | -116.3662811                                |
| 3.471557115                            | 72.58570654                                      | 411.2627411                          | 5268.684794                             | -83.67915955                                |
| 3.418134849                            | 66.09242926                                      | 558.5183716                          | 4368.209206                             | -76.55786133                                |
| 3.192421604                            | 59.73044938                                      | 818.2165527                          | 3567.726584                             | -64.90154266                                |
| 3.591095107                            | 73.4601017                                       | 521.4736633                          | 5396.386542                             | -89.70581818                                |
| 3.742429347                            | 81.80282205                                      | 569.02771                            | 6691.701695                             | -114.5950005                                |
| 3.336057466                            | 67.89501743                                      | 448.692749                           | 4609.733392                             | -82.38104706                                |
| 3.501469964                            | 95.55308904                                      | 510.4755859                          | 9130.392825                             | -122.0407898                                |
| 3.551474743                            | 76.49326208                                      | 874.6080322                          | 5851.219144                             | -90.42140503                                |
| 4.032037051                            | 103.6186114                                      | 777.724823                           | 10736.81663                             | -124.3575935                                |
| 3.638150054                            | 79.54493159                                      | 641.2598877                          | 6327.396141                             | -101.1320778                                |
| 3.500779608                            | 71.44655991                                      | 707.5835266                          | 5104.610923                             | -86.11803055                                |
| 3.33681357                             | 64.48823009                                      | 775.5570374                          | 4158.73182                              | -77.06774902                                |
| 4.235437211                            | 120.6315019                                      | 659.8046875                          | 14551.95926                             | -146.8494141                                |
| 3.583448374                            | 78.83895906                                      | 746.0300293                          | 6215.581465                             | -89.10480118                                |
| 3.65089031                             | 81.92854306                                      | 424.8398132                          | 6712.286168                             | -94.76726074                                |
| 3.376442588                            | 66.32380241                                      | 480.916687                           | 4398.846766                             | -73.20426941                                |
| 3.646411415                            | 84.45166803                                      | 601.3317719                          | 7132.084234                             | -100.0917816                                |

| log.sigma.1.0.mm.3D_firstorder_Kurtosis | log.sigma.1.0.mm.3D_firstorder_Mean | log.sigma.1.0.mm.3D_glrIm_ShortRunLowGrayLevelEmphasis | log.sigma.1.0.mm.3D_glrIm_GrayLevelVariance |
|-----------------------------------------|-------------------------------------|--------------------------------------------------------|---------------------------------------------|
| 3.069435186                             | 0.195832653                         | 0.020206067                                            | 13.5270555                                  |
| 4.736607294                             | -0.134360297                        | 0.007620716                                            | 8.106309927                                 |
| 4.368947031                             | -0.04187834                         | 0.032547691                                            | 13.91897892                                 |
| 3.802342689                             | 5.619075959                         | 0.004172148                                            | 17.52880845                                 |
| 3.908531817                             | 2.742095626                         | 0.026845455                                            | 7.372841402                                 |
| 3.112019301                             | -4.643037996                        | 0.010970373                                            | 8.005617643                                 |
| 5.330733172                             | -1.327415894                        | 0.010861762                                            | 6.613958275                                 |
| 2.94031132                              | -0.329554606                        | 0.006918818                                            | 13.42334804                                 |
| 3.326635977                             | -3.36648752                         | 0.007509538                                            | 11.13413432                                 |
| 4.8646267                               | -2.337909517                        | 0.004985316                                            | 10.13435756                                 |
| 2.854778124                             | -3.742964634                        | 0.012728753                                            | 6.980844652                                 |
| 4.902205764                             | -1.799387862                        | 0.003678486                                            | 14.83880682                                 |
| 3.98602792                              | 3.056581004                         | 0.010978519                                            | 6.783545109                                 |
| 2.920993826                             | 2.235152903                         | 0.018492103                                            | 6.161642902                                 |
| 3.790848745                             | 3.36537596                          | 0.010222254                                            | 9.125047787                                 |
| 9.408994015                             | 0.826177134                         | 0.009368651                                            | 4.708408449                                 |
| 2.694001741                             | -1.422455006                        | 0.038539558                                            | 7.56775065                                  |
| 3.647985865                             | 1.557140268                         | 0.010553916                                            | 6.636625244                                 |
| 2.836879304                             | 4.925073532                         | 0.018478097                                            | 9.493489289                                 |
| 4.452547047                             | 0.938148656                         | 0.012566987                                            | 4.525438268                                 |
| 4.372958956                             | -3.259024311                        | 0.007360228                                            | 7.763201287                                 |
| 3.942252124                             | 4.21125128                          | 0.006389171                                            | 8.621444735                                 |
| 3.396297613                             | -1.21582455                         | 0.010272676                                            | 5.859998487                                 |
| 3.392853746                             | 3.902934504                         | 0.011011687                                            | 12.31431314                                 |
| 4.813633219                             | -7.355747194                        | 0.023376487                                            | 7.422081369                                 |
| 3.650504305                             | -4.21684575                         | 0.010354171                                            | 10.64604816                                 |
| 5.5400107                               | -0.833538524                        | 0.00402882                                             | 7.025892787                                 |
| 4.612980057                             | -5.239765678                        | 0.007095486                                            | 9.306410817                                 |
| 3.025149521                             | 5.643108559                         | 0.010859887                                            | 10.94370009                                 |
| 5.424901906                             | -5.038970902                        | 0.007510355                                            | 7.668517449                                 |
| 5.130326929                             | -4.503844605                        | 0.011451811                                            | 7.804398402                                 |
| 4.636465528                             | 2.513506502                         | 0.015187448                                            | 4.365683872                                 |
| 3.846762224                             | 2.25726112                          | 0.008516427                                            | 13.58896734                                 |
| 3.892670224                             | 6.182466935                         | 0.02703254                                             | 14.22299385                                 |
| 2.83963746                              | 4.409399745                         | 0.01665654                                             | 14.9021288                                  |
| 3.125664644                             | -1.077148866                        | 0.009556227                                            | 7.724046627                                 |
| 3.88442404                              | -0.800821934                        | 0.008836959                                            | 12.29883113                                 |
| 3.877829395                             | 1.163766988                         | 0.002717305                                            | 10.42566503                                 |
| 2.973814306                             | 4.30124142                          | 0.022641438                                            | 6.463350965                                 |
| 3.629516277                             | -0.980480628                        | 0.006585641                                            | 11.92120754                                 |
| 3.953369873                             | -0.601491224                        | 0.008732056                                            | 10.34582763                                 |
| 3.071925298                             | -1.937851905                        | 0.010759083                                            | 9.31300375                                  |
| 3.005062414                             | -2.086322044                        | 0.00863107                                             | 9.663201772                                 |
| 3.444582959                             | 1.219362994                         | 0.012599364                                            | 11.3183304                                  |
| 3.640625525                             | -2.982769724                        | 0.005386964                                            | 10.83346656                                 |
| 4.110713745                             | -0.06410625                         | 0.015040952                                            | 7.636445542                                 |
| 4.347844454                             | 3.091848282                         | 0.002887938                                            | 14.97408754                                 |
| 3.259725237                             | -3.097147503                        | 0.009982812                                            | 10.46198228                                 |
| 4.185692922                             | 1.866833354                         | 0.03390263                                             | 8.148710258                                 |
| 3.473765075                             | 2.24804566                          | 0.00850533                                             | 10.07826683                                 |
| 3.957469217                             | -0.060797247                        | 0.006353932                                            | 8.476693818                                 |
| 2.881508479                             | -4.825790644                        | 0.011593882                                            | 9.600176793                                 |
| 4.26427042                              | -0.077843942                        | 0.002916303                                            | 9.313287294                                 |
| 3.255563801                             | 2.977184447                         | 0.02309085                                             | 7.502019591                                 |
| 5.376726862                             | 1.41361487                          | 0.008174616                                            | 6.259395619                                 |
| 3.017917155                             | -2.789348525                        | 0.018315859                                            | 17.69448068                                 |
| 3.014343964                             | 0.814175677                         | 0.006491638                                            | 14.68766561                                 |
| 3.711981522                             | 3.143622228                         | 0.007010233                                            | 12.56498362                                 |
| 4.853095569                             | -1.893427185                        | 0.011023104                                            | 10.55790745                                 |
| 5.12091123                              | -0.744947147                        | 0.005735554                                            | 6.683554359                                 |
| 3.541793008                             | -2.019282517                        | 0.005128954                                            | 10.25968194                                 |
| 4.447977824                             | 1.693789174                         | 0.004091579                                            | 10.73276195                                 |
| 5.332917546                             | 3.48284894                          | 0.005055365                                            | 5.92514737                                  |
| 30.2944552                              | -0.56073025                         | 0.001197802                                            | 6.196066925                                 |
| 2.78773078                              | 0.107935136                         | 0.040494364                                            | 7.846443928                                 |
| 3.93555705                              | 6.686703965                         | 0.007147384                                            | 11.79034413                                 |
| 2.64448451                              | -3.470628165                        | 0.012438817                                            | 13.36719856                                 |
| 3.853727141                             | 0.18828841                          | 0.004210194                                            | 9.522718802                                 |
| 3.060885858                             | -4.628139972                        | 0.011007089                                            | 10.12740036                                 |
| 4.057168963                             | 0.660990939                         | 0.007851748                                            | 12.32917406                                 |
| 3.495810718                             | -0.996100749                        | 0.007965416                                            | 8.449977428                                 |
| 3.425140177                             | -3.155476943                        | 0.008384046                                            | 7.9744098                                   |
| 4.87787338                              | -0.225699751                        | 0.007335597                                            | 6.961746662                                 |
| 5.414144664                             | -3.001496772                        | 0.00855439                                             | 6.054431557                                 |
| 5.147736258                             | 2.430609947                         | 0.004809047                                            | 9.520942385                                 |
| 3.487649762                             | -2.891117704                        | 0.006904096                                            | 16.36042298                                 |
| 3.260799904                             | -3.334890847                        | 0.011537766                                            | 9.303995179                                 |
| 2.595184805                             | -6.096055339                        | 0.022242578                                            | 10.52990179                                 |
| 3.173582993                             | -5.995102744                        | 0.007682958                                            | 9.450246849                                 |
| 3.947050734                             | -2.283094562                        | 0.010570389                                            | 10.48985567                                 |
| 3.481276689                             | -8.128868452                        | 0.008472521                                            | 14.43141388                                 |
| 3.031762011                             | 2.525964711                         | 0.006524643                                            | 20.1399382                                  |
| 5.643082258                             | 6.024492552                         | 0.001314845                                            | 17.33538574                                 |
| 3.986035842                             | 9.194791017                         | 0.019650944                                            | 9.066334145                                 |
| 3.555216739                             | 1.338186264                         | 0.009209699                                            | 7.495475815                                 |
| 7.128067505                             | 0.119118159                         | 0.00375836                                             | 6.489294134                                 |
| 3.177805567                             | -1.980148274                        | 0.009210251                                            | 9.117939986                                 |
| 2.870817768                             | -1.705837817                        | 0.006347006                                            | 11.20539426                                 |
| 4.37370978                              | 6.489673528                         | 0.012523513                                            | 7.684778374                                 |
| 4.621235877                             | -9.770851097                        | 0.037671463                                            | 15.13952244                                 |
| 6.498709152                             | 0.421347261                         | 0.001955709                                            | 10.30347841                                 |
| 3.981613566                             | -5.174350106                        | 0.005551631                                            | 18.12324572                                 |
| 4.096836576                             | -1.555276841                        | 0.006586854                                            | 11.29659361                                 |
| 4.940738646                             | -1.029499537                        | 0.007023174                                            | 8.988579774                                 |
| 5.085503147                             | 0.372306778                         | 0.004411691                                            | 7.368447305                                 |
| 2.923983695                             | -5.36947281                         | 0.012212183                                            | 23.92990178                                 |
| 6.689910339                             | 3.023429869                         | 0.005245419                                            | 10.76208549                                 |
| 3.043112402                             | 7.317817164                         | 0.01800217                                             | 11.38166417                                 |
| 4.500550664                             | 7.349327425                         | 0.021832106                                            | 7.576822016                                 |
| 4.962322261                             | -2.5997166                          | 0.014816731                                            | 12.69409723                                 |



| log.sigma.1.0.mm.3D_glrIm_LowGrayLevelRunEmphasis | log.sigma.1.0.mm.3D_glrIm_GrayLevelNonUniformityNormalized | log.sigma.1.0.mm.3D_glrIm_RunVariance | log.sigma.1.0.mm.3D_glrIm_GrayLevelNonUniformity |
|---------------------------------------------------|------------------------------------------------------------|---------------------------------------|--------------------------------------------------|
| 0.020914381                                       | 0.081391728                                                | 0.105460969                           | 52.81288533                                      |
| 0.008412192                                       | 0.129387319                                                | 0.293286423                           | 225.7412295                                      |
| 0.03384684                                        | 0.087790293                                                | 0.105920187                           | 35.0358833                                       |
| 0.004370446                                       | 0.072626442                                                | 0.102831444                           | 176.7738965                                      |
| 0.028069665                                       | 0.114468953                                                | 0.121074967                           | 37.16168627                                      |
| 0.01156093                                        | 0.102050489                                                | 0.10773734                            | 59.94871343                                      |
| 0.011346992                                       | 0.135139789                                                | 0.130366519                           | 41.07136931                                      |
| 0.007209695                                       | 0.076797937                                                | 0.088186412                           | 71.43533421                                      |
| 0.007925893                                       | 0.086323152                                                | 0.112372199                           | 163.6826675                                      |
| 0.005337865                                       | 0.103198087                                                | 0.14773291                            | 286.3376704                                      |
| 0.013446886                                       | 0.105866352                                                | 0.112338164                           | 79.99344405                                      |
| 0.003868765                                       | 0.087136174                                                | 0.124072176                           | 117.2443087                                      |
| 0.011718904                                       | 0.112224782                                                | 0.124520093                           | 210.1959826                                      |
| 0.019897298                                       | 0.113499587                                                | 0.156867967                           | 112.4131784                                      |
| 0.010653697                                       | 0.098440662                                                | 0.096984806                           | 82.41314928                                      |
| 0.010825177                                       | 0.207204405                                                | 0.393174417                           | 1147.129281                                      |
| 0.040420565                                       | 0.101875422                                                | 0.117732536                           | 64.43684528                                      |
| 0.011518176                                       | 0.115872308                                                | 0.191298872                           | 235.8422419                                      |
| 0.019382198                                       | 0.092633594                                                | 0.103185455                           | 49.36000639                                      |
| 0.014069208                                       | 0.155364079                                                | 0.308383216                           | 361.5827168                                      |
| 0.008048661                                       | 0.120139529                                                | 0.210870247                           | 543.9125972                                      |
| 0.006802995                                       | 0.100715818                                                | 0.115744361                           | 157.7166093                                      |
| 0.011295206                                       | 0.126003529                                                | 0.212122885                           | 298.2850111                                      |
| 0.011414558                                       | 0.08604576                                                 | 0.088200373                           | 38.27995877                                      |
| 0.025002047                                       | 0.11541616                                                 | 0.178501123                           | 122.4370661                                      |
| 0.01093061                                        | 0.091672535                                                | 0.152439291                           | 56.94557247                                      |
| 0.004459161                                       | 0.132101408                                                | 0.264309566                           | 386.7129857                                      |
| 0.007609545                                       | 0.109430288                                                | 0.16050285                            | 139.4068423                                      |
| 0.011386141                                       | 0.085682874                                                | 0.102005662                           | 139.2293838                                      |
| 0.008334661                                       | 0.132433462                                                | 0.29676978                            | 281.3158152                                      |
| 0.012373623                                       | 0.120393436                                                | 0.17339486                            | 338.577438                                       |
| 0.016853679                                       | 0.151410488                                                | 0.234722796                           | 767.3989521                                      |
| 0.008890372                                       | 0.081674634                                                | 0.109987036                           | 152.455893                                       |
| 0.027692856                                       | 0.093506413                                                | 0.06090981                            | 9.196075819                                      |
| 0.017066826                                       | 0.0750222                                                  | 0.070576783                           | 23.45437763                                      |
| 0.010169393                                       | 0.102068625                                                | 0.123348833                           | 186.5177918                                      |
| 0.009427886                                       | 0.096837884                                                | 0.176370947                           | 248.37186                                        |
| 0.002892586                                       | 0.094632442                                                | 0.139564273                           | 286.7945389                                      |
| 0.023750707                                       | 0.11171155                                                 | 0.112003264                           | 84.82358424                                      |
| 0.006907633                                       | 0.084507426                                                | 0.107787982                           | 81.30892384                                      |
| 0.009378625                                       | 0.102503347                                                | 0.197517583                           | 132.0302515                                      |
| 0.011367845                                       | 0.093495292                                                | 0.1077447                             | 81.26597731                                      |
| 0.009090971                                       | 0.091624368                                                | 0.104683174                           | 137.9291872                                      |
| 0.01318316                                        | 0.087083843                                                | 0.096861328                           | 81.89984057                                      |
| 0.005659341                                       | 0.08905258                                                 | 0.101191187                           | 153.687182                                       |
| 0.016124707                                       | 0.114247407                                                | 0.162714377                           | 226.1235993                                      |
| 0.003042425                                       | 0.079221927                                                | 0.112041037                           | 309.5054739                                      |
| 0.01046101                                        | 0.089297046                                                | 0.100221851                           | 47.69436887                                      |
| 0.034517225                                       | 0.12359589                                                 | 0.090869266                           | 15.31853871                                      |
| 0.00886672                                        | 0.095023687                                                | 0.091093057                           | 43.57017336                                      |
| 0.006827987                                       | 0.10653777                                                 | 0.155970429                           | 325.3575063                                      |
| 0.012163416                                       | 0.091008429                                                | 0.095580493                           | 69.18561346                                      |
| 0.003142341                                       | 0.104835337                                                | 0.17705368                            | 354.5032669                                      |
| 0.024274272                                       | 0.106864378                                                | 0.114229305                           | 57.4204492                                       |
| 0.009067277                                       | 0.165399546                                                | 0.274194395                           | 913.9804819                                      |
| 0.018714175                                       | 0.068918501                                                | 0.085433089                           | 56.43836193                                      |
| 0.006808101                                       | 0.073506364                                                | 0.090081388                           | 149.409594                                       |
| 0.007320208                                       | 0.090412324                                                | 0.09695775                            | 107.5047054                                      |
| 0.01159281                                        | 0.102605607                                                | 0.174166378                           | 73.92311637                                      |
| 0.006098431                                       | 0.117818976                                                | 0.14185259                            | 92.6565807                                       |
| 0.005426462                                       | 0.091977465                                                | 0.11582692                            | 177.7098422                                      |
| 0.004397241                                       | 0.098288684                                                | 0.160376513                           | 480.563537                                       |
| 0.00552354                                        | 0.144581049                                                | 0.22625501                            | 385.7229309                                      |
| 0.001312395                                       | 0.157351419                                                | 0.358073887                           | 348.7031769                                      |
| 0.042327816                                       | 0.102204707                                                | 0.111907929                           | 20.18363804                                      |
| 0.007550118                                       | 0.091988763                                                | 0.124976993                           | 129.7024878                                      |
| 0.012810263                                       | 0.079204847                                                | 0.066598928                           | 29.34392112                                      |
| 0.00449218                                        | 0.097573619                                                | 0.130525428                           | 281.6196268                                      |
| 0.01144289                                        | 0.089860029                                                | 0.092454273                           | 36.99465892                                      |
| 0.008255868                                       | 0.091260321                                                | 0.114749923                           | 167.4509084                                      |
| 0.00852999                                        | 0.104262861                                                | 0.139196007                           | 284.4553689                                      |
| 0.008882533                                       | 0.102178679                                                | 0.11211624                            | 104.9965439                                      |
| 0.00801671                                        | 0.128444278                                                | 0.235452353                           | 574.2181773                                      |
| 0.009431532                                       | 0.138650692                                                | 0.24580387                            | 795.3768532                                      |
| 0.005197626                                       | 0.113288835                                                | 0.189124746                           | 911.7712329                                      |
| 0.007120554                                       | 0.072094787                                                | 0.072221134                           | 75.52359295                                      |
| 0.012124732                                       | 0.093759799                                                | 0.112641441                           | 95.68176682                                      |
| 0.023258701                                       | 0.085827364                                                | 0.099089566                           | 48.17080538                                      |
| 0.00815014                                        | 0.092793917                                                | 0.125283324                           | 148.0166887                                      |
| 0.011222893                                       | 0.094900061                                                | 0.145541609                           | 242.9335551                                      |
| 0.008788548                                       | 0.078683426                                                | 0.090460412                           | 36.82814949                                      |
| 0.006688319                                       | 0.063660781                                                | 0.062011937                           | 80.85106453                                      |
| 0.00137012                                        | 0.081945339                                                | 0.105327348                           | 210.7398551                                      |
| 0.020222571                                       | 0.112979319                                                | 0.089818816                           | 15.17232966                                      |
| 0.009830512                                       | 0.109963409                                                | 0.137791266                           | 335.5936401                                      |
| 0.004178064                                       | 0.133297146                                                | 0.245815473                           | 620.236134                                       |
| 0.009666667                                       | 0.094198251                                                | 0.099387587                           | 67.31967629                                      |
| 0.006652873                                       | 0.084785774                                                | 0.089295608                           | 121.7975654                                      |
| 0.013009013                                       | 0.113721895                                                | 0.117802623                           | 18.89342108                                      |
| 0.037960986                                       | 0.114139881                                                | 0.061540811                           | 11.30500363                                      |
| 0.002097532                                       | 0.105164318                                                | 0.186163189                           | 369.0101901                                      |
| 0.005752177                                       | 0.073260051                                                | 0.098998754                           | 47.87671496                                      |
| 0.007017127                                       | 0.096379823                                                | 0.183373393                           | 86.97590852                                      |
| 0.007550882                                       | 0.107353615                                                | 0.17583559                            | 387.3624031                                      |
| 0.004813625                                       | 0.120499812                                                | 0.187585562                           | 613.313258                                       |
| 0.012476298                                       | 0.060627009                                                | 0.060335105                           | 14.50975099                                      |
| 0.00551354                                        | 0.101069151                                                | 0.142502988                           | 110.2310656                                      |
| 0.018472266                                       | 0.090270216                                                | 0.067556399                           | 10.40998512                                      |
| 0.02266546                                        | 0.113905846                                                | 0.113064477                           | 39.08481615                                      |
| 0.015773025                                       | 0.097920232                                                | 0.173883927                           | 69.58703977                                      |

| log.sigma.1.0.mm.3D_glrIm_LongRunEmphasis | log.sigma.1.0.mm.3D_glrIm_ShortRunHighGrayLevelEmphasis | log.sigma.1.0.mm.3D_glrIm_RunLengthNonUniformity | log.sigma.1.0.mm.3D_glrIm_ShortRunEmphasis |
|-------------------------------------------|---------------------------------------------------------|--------------------------------------------------|--------------------------------------------|
| 1.289710372                               | 117.7281695                                             | 555.2457346                                      | 0.94043204                                 |
| 1.174479837                               | 147.7791799                                             | 1303.206508                                      | 0.886943782                                |
| 1.290097745                               | 83.83074612                                             | 342.0177837                                      | 0.940752026                                |
| 1.275611203                               | 315.2897275                                             | 2105.91048                                       | 0.944516423                                |
| 1.346330455                               | 75.57958512                                             | 268.2031296                                      | 0.926626058                                |
| 1.30712432                                | 128.2231761                                             | 495.3541365                                      | 0.934668492                                |
| 1.366465702                               | 147.6703237                                             | 250.2024398                                      | 0.9249406                                  |
| 1.249461022                               | 212.2477321                                             | 809.1702599                                      | 0.946614521                                |
| 1.315187744                               | 178.0842147                                             | 1597.198854                                      | 0.934393869                                |
| 1.3957635                                 | 230.81161                                               | 2273.293058                                      | 0.92343706                                 |
| 1.312135509                               | 107.6436487                                             | 639.3467569                                      | 0.935794726                                |
| 1.338835683                               | 367.8779361                                             | 1128.546973                                      | 0.932353437                                |
| 1.351833768                               | 111.858586                                              | 1547.689882                                      | 0.926947076                                |
| 1.434459028                               | 74.17081019                                             | 794.1529484                                      | 0.914427486                                |
| 1.281575558                               | 159.763198                                              | 712.3804491                                      | 0.938486296                                |
| 1.97927155                                | 100.349712                                              | 3759.939534                                      | 0.849950232                                |
| 1.338441073                               | 59.102704                                               | 525.3877239                                      | 0.928443756                                |
| 1.507780411                               | 108.6573601                                             | 1596.500909                                      | 0.906127785                                |
| 1.297449036                               | 97.76358397                                             | 451.0740381                                      | 0.936107117                                |
| 1.767575263                               | 85.36855214                                             | 1698.905933                                      | 0.877310974                                |
| 1.543941346                               | 147.4686955                                             | 3527.265146                                      | 0.903842035                                |
| 1.325142963                               | 184.3734128                                             | 1314.893371                                      | 0.932637071                                |
| 1.548730898                               | 105.7868422                                             | 1842.761444                                      | 0.902631856                                |
| 1.258405517                               | 162.1460225                                             | 382.8142223                                      | 0.942600754                                |
| 1.469125649                               | 69.87476908                                             | 847.4682038                                      | 0.913478131                                |
| 1.402440146                               | 152.7466784                                             | 509.5288873                                      | 0.923718759                                |
| 1.667816352                               | 248.7254958                                             | 2191.104932                                      | 0.888269231                                |
| 1.429350853                               | 173.2018007                                             | 1031.120298                                      | 0.918509101                                |
| 1.28615456                                | 140.0493132                                             | 1397.343873                                      | 0.940973413                                |
| 1.733346972                               | 141.3724136                                             | 1567.932608                                      | 0.88261639                                 |
| 1.454064004                               | 107.0112064                                             | 2262.354453                                      | 0.916053398                                |
| 1.610573689                               | 71.34125284                                             | 3843.550348                                      | 0.89262217                                 |
| 1.297141271                               | 187.58576                                               | 1597.014279                                      | 0.940206179                                |
| 1.182061522                               | 126.2225572                                             | 88.18090128                                      | 0.958085143                                |
| 1.199392359                               | 145.2722067                                             | 279.3193953                                      | 0.956817993                                |
| 1.346136622                               | 129.587183                                              | 1516.104681                                      | 0.928502407                                |
| 1.439539216                               | 156.939721                                              | 2102.520967                                      | 0.92314346                                 |
| 1.365153828                               | 404.5628586                                             | 2526.497385                                      | 0.930252449                                |
| 1.323610861                               | 75.99148478                                             | 635.1562551                                      | 0.931193315                                |
| 1.297545844                               | 208.3048849                                             | 820.2623919                                      | 0.938873039                                |
| 1.509780463                               | 152.6894449                                             | 1019.167672                                      | 0.909463629                                |
| 1.310840698                               | 131.5095135                                             | 730.2823317                                      | 0.933394097                                |
| 1.296582714                               | 154.0495739                                             | 1280.717355                                      | 0.937651271                                |
| 1.286241224                               | 136.5785987                                             | 797.4427923                                      | 0.936702755                                |
| 1.286302426                               | 231.7322232                                             | 1472.543116                                      | 0.939288016                                |
| 1.433650028                               | 91.21415578                                             | 1599.298444                                      | 0.917633196                                |
| 1.304883785                               | 414.4009979                                             | 3321.922591                                      | 0.938030762                                |
| 1.293034582                               | 154.6436826                                             | 452.0901683                                      | 0.936094286                                |
| 1.260864485                               | 92.44807253                                             | 107.0278174                                      | 0.943795801                                |
| 1.267259927                               | 182.6980218                                             | 392.7164453                                      | 0.940802048                                |
| 1.414377203                               | 176.7644946                                             | 2485.415893                                      | 0.920810468                                |
| 1.280933367                               | 129.0426925                                             | 647.4949694                                      | 0.938286888                                |
| 1.455428806                               | 358.354018                                              | 2729.707585                                      | 0.917408441                                |
| 1.3257642                                 | 76.93203618                                             | 449.3388914                                      | 0.931446516                                |
| 1.676812481                               | 126.1989213                                             | 4166.426066                                      | 0.890171648                                |
| 1.238846467                               | 162.635239                                              | 717.4509386                                      | 0.949282491                                |
| 1.256328064                               | 215.3576662                                             | 1762.411695                                      | 0.945061666                                |
| 1.280453719                               | 212.5784855                                             | 1013.764706                                      | 0.939041257                                |
| 1.452498295                               | 152.0671705                                             | 582.3110868                                      | 0.917772104                                |
| 1.399725277                               | 227.6718815                                             | 636.7715774                                      | 0.918799676                                |
| 1.319560677                               | 232.9398197                                             | 1628.840421                                      | 0.934603138                                |
| 1.417665768                               | 264.8013486                                             | 3994.464662                                      | 0.922164486                                |
| 1.577005227                               | 200.6729714                                             | 2064.408888                                      | 0.900345734                                |
| 1.882337291                               | 1034.225157                                             | 1562.097495                                      | 0.864419521                                |
| 1.321121754                               | 60.34514391                                             | 165.5467364                                      | 0.932228319                                |
| 1.340858147                               | 189.4399305                                             | 1180.766454                                      | 0.931806576                                |
| 1.198750051                               | 158.6532614                                             | 328.6903224                                      | 0.954293338                                |
| 1.358489316                               | 262.8322077                                             | 2393.734243                                      | 0.928183474                                |
| 1.266435631                               | 152.1911553                                             | 353.910508                                       | 0.942233892                                |
| 1.317468629                               | 184.7605056                                             | 1549.588585                                      | 0.935182784                                |
| 1.383738186                               | 153.2202177                                             | 2237.298221                                      | 0.923494189                                |
| 1.320711907                               | 151.1060509                                             | 859.8697047                                      | 0.931837857                                |
| 1.578155264                               | 149.102093                                              | 3484.480459                                      | 0.90339453                                 |
| 1.619042915                               | 122.6457807                                             | 4365.406132                                      | 0.894593729                                |
| 1.491417698                               | 231.2686666                                             | 6374.262856                                      | 0.910388625                                |
| 1.208288411                               | 241.0184827                                             | 928.3811211                                      | 0.953836796                                |
| 1.312266923                               | 130.4466963                                             | 863.3552827                                      | 0.935784683                                |
| 1.282712229                               | 92.19273457                                             | 479.7340239                                      | 0.939654748                                |
| 1.351468811                               | 173.9341249                                             | 1324.360397                                      | 0.928181373                                |
| 1.382951177                               | 131.2870617                                             | 2118.737219                                      | 0.92721683                                 |
| 1.252562474                               | 206.0718269                                             | 408.3989762                                      | 0.947156021                                |
| 1.177446531                               | 284.4534922                                             | 1144.990114                                      | 0.960491177                                |
| 1.285689704                               | 1028.746115                                             | 2212.963506                                      | 0.942257512                                |
| 1.258460692                               | 121.1546467                                             | 116.2391109                                      | 0.944361736                                |
| 1.374395788                               | 131.9323682                                             | 2518.677743                                      | 0.92607004                                 |
| 1.632510724                               | 250.0581917                                             | 3497.918132                                      | 0.89014191                                 |
| 1.285657796                               | 154.6978304                                             | 608.5477201                                      | 0.938484843                                |
| 1.257383889                               | 207.941446                                              | 1240.132113                                      | 0.943840335                                |
| 1.344079198                               | 159.4574479                                             | 139.4028707                                      | 0.92903385                                 |
| 1.189048822                               | 178.951866                                              | 88.25449499                                      | 0.955392065                                |
| 1.471336002                               | 560.8681096                                             | 2824.317057                                      | 0.916312042                                |
| 1.267359767                               | 302.2793058                                             | 568.1189751                                      | 0.946120042                                |
| 1.467788014                               | 203.1866129                                             | 726.6667243                                      | 0.916426057                                |
| 1.462824453                               | 174.8375349                                             | 2885.814644                                      | 0.913927636                                |
| 1.490375336                               | 228.7078329                                             | 4029.668087                                      | 0.910154093                                |
| 1.179193081                               | 219.7563911                                             | 214.9462689                                      | 0.958790891                                |
| 1.386718554                               | 295.8413155                                             | 894.7117279                                      | 0.924028329                                |
| 1.20689826                                | 143.0269251                                             | 101.5606231                                      | 0.95126759                                 |
| 1.33502316                                | 96.2000625                                              | 283.2085057                                      | 0.926450598                                |
| 1.465449925                               | 112.400784                                              | 566.5136197                                      | 0.912675449                                |

| log.sigma.1.0.mm.3D_glrIm_LongRunHighGrayLevelEmphasis | log.sigma.1.0.mm.3D_glrIm_RunPercentage | log.sigma.1.0.mm.3D_glrIm_LongRunLowGrayLevelEmphasis | log.sigma.1.0.mm.3D_glrIm_RunEntropy |
|--------------------------------------------------------|-----------------------------------------|-------------------------------------------------------|--------------------------------------|
| 155.9037469                                            | 0.919045544                             | 0.024314524                                           | 4.265188987                          |
| 274.0590451                                            | 0.839672605                             | 0.013352991                                           | 4.09589257                           |
| 105.5727922                                            | 0.919354839                             | 0.039979721                                           | 4.180101361                          |
| 417.3951781                                            | 0.923660779                             | 0.005349406                                           | 4.470022889                          |
| 108.6884137                                            | 0.904221127                             | 0.033927817                                           | 3.840033281                          |
| 175.3039621                                            | 0.9135064                               | 0.014339662                                           | 3.949025967                          |
| 222.5669645                                            | 0.900935859                             | 0.013665337                                           | 3.693963809                          |
| 277.5490457                                            | 0.928297252                             | 0.008559075                                           | 4.271458395                          |
| 247.203706                                             | 0.912013912                             | 0.009913198                                           | 4.220840339                          |
| 339.9319242                                            | 0.895515717                             | 0.007165761                                           | 4.141537318                          |
| 147.505113                                             | 0.913589434                             | 0.016923029                                           | 3.86260765                           |
| 520.3285558                                            | 0.907816879                             | 0.004816951                                           | 4.334836621                          |
| 159.1076655                                            | 0.903048735                             | 0.015294225                                           | 3.886118292                          |
| 111.9279339                                            | 0.885922664                             | 0.027033409                                           | 3.88696923                           |
| 214.7028908                                            | 0.918939458                             | 0.01262315                                            | 4.013047588                          |
| 221.1917009                                            | 0.796104572                             | 0.02032558                                            | 3.719020752                          |
| 82.53502407                                            | 0.906105356                             | 0.049191172                                           | 3.934071081                          |
| 173.8925944                                            | 0.872608524                             | 0.016735377                                           | 3.981388639                          |
| 132.7156827                                            | 0.91554322                              | 0.023496421                                           | 4.055077688                          |
| 164.0718573                                            | 0.830252932                             | 0.023383566                                           | 3.799270985                          |
| 242.5028702                                            | 0.866459536                             | 0.011913182                                           | 4.038975885                          |
| 254.9418002                                            | 0.910330948                             | 0.008787641                                           | 4.019512787                          |
| 172.8945621                                            | 0.866490156                             | 0.017031048                                           | 3.881492997                          |
| 215.6429482                                            | 0.924836079                             | 0.013206447                                           | 4.18276593                           |
| 105.5691656                                            | 0.880909788                             | 0.033581356                                           | 3.96031183                           |
| 223.9816967                                            | 0.89492352                              | 0.013909656                                           | 4.19284054                           |
| 457.1307823                                            | 0.844444938                             | 0.007020554                                           | 4.020920792                          |
| 259.456275                                             | 0.888721885                             | 0.010316477                                           | 4.070946298                          |
| 188.1695258                                            | 0.920679887                             | 0.013964086                                           | 4.16538831                           |
| 269.3107033                                            | 0.83522968                              | 0.013417749                                           | 4.070863583                          |
| 161.0569921                                            | 0.884361313                             | 0.017305676                                           | 3.968629977                          |
| 122.2395398                                            | 0.854287197                             | 0.026328682                                           | 3.719499392                          |
| 253.3872752                                            | 0.918082409                             | 0.010731706                                           | 4.311713789                          |
| 154.1264867                                            | 0.945266272                             | 0.030456603                                           | 3.982994724                          |
| 179.2486843                                            | 0.941612604                             | 0.018923257                                           | 4.219946823                          |
| 185.6230838                                            | 0.904607768                             | 0.013127173                                           | 3.985412837                          |
| 234.6856394                                            | 0.890331197                             | 0.012726064                                           | 4.261708276                          |
| 584.4525193                                            | 0.903490666                             | 0.003810672                                           | 4.167177364                          |
| 107.8148618                                            | 0.90935053                              | 0.028885863                                           | 3.825267753                          |
| 283.1983417                                            | 0.9171372                               | 0.00847454                                            | 4.21952082                           |
| 245.5981047                                            | 0.873656195                             | 0.012946429                                           | 4.220549383                          |
| 181.0215345                                            | 0.912018726                             | 0.014203974                                           | 4.078752217                          |
| 211.6270818                                            | 0.916752553                             | 0.011269619                                           | 4.092537036                          |
| 183.6142022                                            | 0.917523452                             | 0.015812266                                           | 4.195001108                          |
| 317.768316                                             | 0.918898992                             | 0.006932718                                           | 4.161781262                          |
| 135.9235515                                            | 0.888102472                             | 0.0218153                                             | 3.977334878                          |
| 569.9625958                                            | 0.915756068                             | 0.003800305                                           | 4.392616118                          |
| 208.8684351                                            | 0.916083916                             | 0.012680597                                           | 4.104505957                          |
| 125.0661587                                            | 0.924799082                             | 0.03730223                                            | 3.719970027                          |
| 246.0032873                                            | 0.922457824                             | 0.010494761                                           | 4.023603804                          |
| 266.0748769                                            | 0.891826923                             | 0.009293354                                           | 4.071561545                          |
| 174.2057444                                            | 0.91917031                              | 0.014760571                                           | 4.048720177                          |
| 562.1417603                                            | 0.884907294                             | 0.004386771                                           | 4.136946838                          |
| 106.7065894                                            | 0.909019914                             | 0.029782463                                           | 3.919985899                          |
| 228.7688399                                            | 0.846153846                             | 0.014548131                                           | 3.836280996                          |
| 209.5389317                                            | 0.93156559                              | 0.02055931                                            | 4.430902874                          |
| 280.0710173                                            | 0.926795047                             | 0.00827879                                            | 4.360844514                          |
| 290.0421542                                            | 0.919566899                             | 0.008732073                                           | 4.205023573                          |
| 234.8489922                                            | 0.884898885                             | 0.01470803                                            | 4.166868698                          |
| 339.7628395                                            | 0.892429931                             | 0.007887661                                           | 3.849846233                          |
| 324.3239586                                            | 0.911750826                             | 0.006883671                                           | 4.152037657                          |
| 398.240259                                             | 0.892366669                             | 0.006040013                                           | 4.214255857                          |
| 340.8054469                                            | 0.862459547                             | 0.008434231                                           | 3.833707976                          |
| 2242.846522                                            | 0.811170887                             | 0.002059266                                           | 3.904759265                          |
| 82.67196663                                            | 0.909961007                             | 0.050843489                                           | 3.87822292                           |
| 265.8688735                                            | 0.907573431                             | 0.0095592                                             | 4.226955795                          |
| 198.6330869                                            | 0.940257712                             | 0.014411568                                           | 4.152197853                          |
| 380.4448896                                            | 0.902745362                             | 0.005893316                                           | 4.128448744                          |
| 203.2356271                                            | 0.923076923                             | 0.013438761                                           | 4.056683867                          |
| 253.4565382                                            | 0.912251846                             | 0.010230002                                           | 4.234679275                          |
| 221.7202631                                            | 0.897317814                             | 0.011366721                                           | 4.048673091                          |
| 211.4653739                                            | 0.910063364                             | 0.011214904                                           | 3.976760101                          |
| 250.6825696                                            | 0.864432008                             | 0.012077642                                           | 3.972163821                          |
| 215.3736855                                            | 0.85398818                              | 0.014552734                                           | 3.910349275                          |
| 372.1912319                                            | 0.876579521                             | 0.007318293                                           | 4.147724484                          |
| 305.3847357                                            | 0.938585608                             | 0.008085732                                           | 4.351703312                          |
| 179.6805967                                            | 0.91350458                              | 0.014947257                                           | 4.066865988                          |
| 120.8390354                                            | 0.919924338                             | 0.027939132                                           | 4.106846748                          |
| 246.7388613                                            | 0.904151404                             | 0.010439248                                           | 4.120302907                          |
| 189.588313                                             | 0.899372939                             | 0.014612854                                           | 4.186762115                          |
| 266.2926305                                            | 0.928571429                             | 0.010281384                                           | 4.268971962                          |
| 346.6266845                                            | 0.947054437                             | 0.007423103                                           | 4.47554998                           |
| 1395.911835                                            | 0.920927926                             | 0.001643783                                           | 4.410018872                          |
| 157.2482322                                            | 0.925729443                             | 0.022876407                                           | 3.823102894                          |
| 190.609663                                             | 0.899848014                             | 0.012979557                                           | 3.958798294                          |
| 449.5566871                                            | 0.84958139                              | 0.00659406                                            | 3.964355538                          |
| 206.9600872                                            | 0.918528772                             | 0.011819033                                           | 4.026745245                          |
| 274.4864735                                            | 0.925555115                             | 0.008051799                                           | 4.151570823                          |
| 228.1129228                                            | 0.90752417                              | 0.015355731                                           | 3.753938211                          |
| 221.5559864                                            | 0.942857143                             | 0.039197344                                           | 3.7746548                            |
| 894.6523332                                            | 0.88259313                              | 0.002897705                                           | 4.17669511                           |
| 396.3252919                                            | 0.925582916                             | 0.006739696                                           | 4.434859061                          |
| 316.4994041                                            | 0.882808972                             | 0.009409502                                           | 4.246777452                          |
| 273.9558992                                            | 0.882076359                             | 0.010349225                                           | 4.127331933                          |
| 363.2040301                                            | 0.876493813                             | 0.007008878                                           | 3.992278632                          |
| 264.6124273                                            | 0.945880207                             | 0.013606066                                           | 4.509109394                          |
| 444.1730412                                            | 0.896824393                             | 0.00688875                                            | 4.128772185                          |
| 180.4507711                                            | 0.937460913                             | 0.020438697                                           | 3.932625015                          |
| 137.4338606                                            | 0.905216156                             | 0.026496277                                           | 3.862244702                          |
| 171.0191962                                            | 0.880373654                             | 0.020736836                                           | 4.261643248                          |

| log.sigma.1.0.mm.3D_glrIm_HighGrayLevelRunEmphasis | log.sigma.1.0.mm.3D_glrIm_RunLengthNonUniformityNormalized | log.sigma.1.0.mm.3D_glszm_GrayLevelVariance |
|----------------------------------------------------|------------------------------------------------------------|---------------------------------------------|
| 124.3387122                                        | 0.855600232                                                | 21.38339921                                 |
| 165.1200487                                        | 0.746489586                                                | 18.13101569                                 |
| 87.52713358                                        | 0.856718128                                                | 21.85110299                                 |
| 332.5071873                                        | 0.864987903                                                | 27.69881208                                 |
| 81.45376338                                        | 0.825394333                                                | 14.26946582                                 |
| 136.5446015                                        | 0.842842383                                                | 14.66850321                                 |
| 160.2907756                                        | 0.822627369                                                | 13.02066116                                 |
| 223.7970899                                        | 0.86954824                                                 | 20.84354273                                 |
| 189.990587                                         | 0.84215026                                                 | 19.89748999                                 |
| 248.5933008                                        | 0.819022352                                                | 20.99981062                                 |
| 114.4927388                                        | 0.845605892                                                | 12.13205616                                 |
| 393.3098666                                        | 0.838305256                                                | 28.19498332                                 |
| 120.0693762                                        | 0.825962048                                                | 14.09626682                                 |
| 80.47650419                                        | 0.800638654                                                | 12.30498866                                 |
| 169.6285437                                        | 0.850794152                                                | 16.93097544                                 |
| 116.5735198                                        | 0.678364075                                                | 16.20230081                                 |
| 63.21569694                                        | 0.829670044                                                | 14.11293917                                 |
| 118.9728699                                        | 0.783562928                                                | 15.24809786                                 |
| 103.9343983                                        | 0.846027826                                                | 16.57698822                                 |
| 96.28232772                                        | 0.728600252                                                | 11.18467609                                 |
| 161.8252849                                        | 0.778943642                                                | 17.25971747                                 |
| 196.4719588                                        | 0.838821818                                                | 15.37540167                                 |
| 116.0200251                                        | 0.777296848                                                | 11.31877321                                 |
| 171.8008041                                        | 0.860100578                                                | 19.68920363                                 |
| 75.45088878                                        | 0.798491452                                                | 14.64665521                                 |
| 164.0537232                                        | 0.81992402                                                 | 20.00928019                                 |
| 278.6751877                                        | 0.748328644                                                | 17.3601234                                  |
| 187.0507623                                        | 0.808907621                                                | 18.33589205                                 |
| 148.3203809                                        | 0.858244545                                                | 17.40953772                                 |
| 159.027572                                         | 0.737863244                                                | 18.67477627                                 |
| 115.4914536                                        | 0.804011121                                                | 16.30718504                                 |
| 79.06662303                                        | 0.757185309                                                | 11.0886832                                  |
| 198.6808658                                        | 0.855347605                                                | 24.60316498                                 |
| 131.4532627                                        | 0.896071823                                                | 21.01856043                                 |
| 151.3328208                                        | 0.893087325                                                | 22.36128889                                 |
| 139.2177671                                        | 0.829390616                                                | 15.29298683                                 |
| 168.6007995                                        | 0.819412268                                                | 22.27371055                                 |
| 433.5686275                                        | 0.833576115                                                | 19.71563263                                 |
| 81.53621789                                        | 0.835609079                                                | 12.16825994                                 |
| 221.162012                                         | 0.852271755                                                | 20.84144612                                 |
| 166.7149471                                        | 0.79076349                                                 | 20.6603797                                  |
| 140.2910963                                        | 0.839875046                                                | 16.14686348                                 |
| 164.0941617                                        | 0.849943406                                                | 16.52503976                                 |
| 145.1091198                                        | 0.847254672                                                | 20.3324543                                  |
| 246.7670705                                        | 0.852961099                                                | 18.89971309                                 |
| 98.44353977                                        | 0.807222587                                                | 14.75953326                                 |
| 440.7700984                                        | 0.850193389                                                | 26.80495101                                 |
| 164.4357467                                        | 0.84594428                                                 | 18.7823937                                  |
| 98.16881909                                        | 0.863332624                                                | 14.87654321                                 |
| 194.1936816                                        | 0.856165681                                                | 16.11857074                                 |
| 191.1581476                                        | 0.813528936                                                | 17.29588256                                 |
| 137.2306068                                        | 0.851023567                                                | 15.37341938                                 |
| 389.7710932                                        | 0.806849785                                                | 18.37398637                                 |
| 82.1415275                                         | 0.835875843                                                | 14.01362544                                 |
| 140.6678158                                        | 0.753173096                                                | 15.75523409                                 |
| 170.8965403                                        | 0.875697702                                                | 27.48567651                                 |
| 226.8066668                                        | 0.866278163                                                | 22.67573064                                 |
| 226.4148542                                        | 0.852243759                                                | 22.82413979                                 |
| 164.8854486                                        | 0.80795414                                                 | 21.65417928                                 |
| 246.6727003                                        | 0.809128891                                                | 14.57389822                                 |
| 248.5973601                                        | 0.842773601                                                | 19.70907014                                 |
| 285.9520097                                        | 0.816628778                                                | 21.18781009                                 |
| 221.4775149                                        | 0.772846956                                                | 13.99413712                                 |
| 1195.575695                                        | 0.704145544                                                | 18.89354195                                 |
| 64.32003718                                        | 0.837815086                                                | 11.38387755                                 |
| 202.2932727                                        | 0.837071472                                                | 22.08612043                                 |
| 166.1159988                                        | 0.886767451                                                | 17.78958367                                 |
| 282.473958                                         | 0.829059416                                                | 18.61799488                                 |
| 161.3015069                                        | 0.859469661                                                | 16.56168641                                 |
| 196.4829496                                        | 0.844262225                                                | 23.20038022                                 |
| 164.7126412                                        | 0.819274678                                                | 16.33261011                                 |
| 161.6910794                                        | 0.836450696                                                | 15.76973223                                 |
| 163.7585531                                        | 0.778732587                                                | 16.21892546                                 |
| 136.2289742                                        | 0.760584967                                                | 14.95454238                                 |
| 253.1030992                                        | 0.791869441                                                | 21.10300842                                 |
| 252.6230694                                        | 0.885881983                                                | 26.33084908                                 |
| 138.8550196                                        | 0.845578017                                                | 16.53231405                                 |
| 97.25291401                                        | 0.854099618                                                | 16.7289504                                  |
| 186.3561509                                        | 0.829326223                                                | 17.25528786                                 |
| 140.6667001                                        | 0.827345218                                                | 20.42241347                                 |
| 216.5172159                                        | 0.871600703                                                | 22.61877454                                 |
| 295.8152465                                        | 0.901318473                                                | 28.17674588                                 |
| 1090.667414                                        | 0.860150736                                                | 30.21911394                                 |
| 127.6083836                                        | 0.865129548                                                | 16.74885464                                 |
| 141.7092235                                        | 0.824778949                                                | 14.8920102                                  |
| 279.7290196                                        | 0.75156888                                                 | 18.3420298                                  |
| 164.1284708                                        | 0.851148532                                                | 16.79715813                                 |
| 219.9112562                                        | 0.862983515                                                | 18.00610255                                 |
| 171.2607729                                        | 0.8347217                                                  | 11.7875                                     |
| 187.120323                                         | 0.890143844                                                | 23.16767533                                 |
| 611.4336462                                        | 0.804585093                                                | 21.61908445                                 |
| 318.0671578                                        | 0.868951509                                                | 30.77707403                                 |
| 220.4360607                                        | 0.804991473                                                | 22.17414538                                 |
| 190.4198148                                        | 0.799341767                                                | 20.20607923                                 |
| 249.6735301                                        | 0.791495082                                                | 16.74321573                                 |
| 228.1459965                                        | 0.897593022                                                | 32.06213569                                 |
| 320.2891443                                        | 0.820140596                                                | 21.70182278                                 |
| 150.1631224                                        | 0.880018746                                                | 15.32544379                                 |
| 103.7113814                                        | 0.824828896                                                | 16.5451                                     |
| 121.652291                                         | 0.796943316                                                | 25.50984905                                 |

| log.sigma.1.0.mm.3D_glszm_SmallAreaHighGrayLevelEmphasis | log.sigma.1.0.mm.3D_glszm_GrayLevelNonUniformityNormalized | log.sigma.1.0.mm.3D_glszm_SizeZoneNonUniformityNormalized |
|----------------------------------------------------------|------------------------------------------------------------|-----------------------------------------------------------|
| 98.66300502                                              | 0.06069459                                                 | 0.410426659                                               |
| 126.484338                                               | 0.067315949                                                | 0.391324291                                               |
| 95.41113021                                              | 0.06477721                                                 | 0.508137327                                               |
| 245.7760489                                              | 0.053201248                                                | 0.42446609                                                |
| 57.48099217                                              | 0.081484835                                                | 0.378225441                                               |
| 108.29406                                                | 0.078512397                                                | 0.443475156                                               |
| 89.64601472                                              | 0.090909091                                                | 0.369318182                                               |
| 155.5019286                                              | 0.061636231                                                | 0.425697589                                               |
| 135.0723235                                              | 0.062613083                                                | 0.387568367                                               |
| 195.2178136                                              | 0.067794693                                                | 0.433480978                                               |
| 84.53565542                                              | 0.084314852                                                | 0.377693192                                               |
| 283.7842818                                              | 0.059480792                                                | 0.429470125                                               |
| 86.49906627                                              | 0.078949408                                                | 0.356764214                                               |
| 56.24960903                                              | 0.087899975                                                | 0.381519274                                               |
| 121.172767                                               | 0.069359802                                                | 0.404197747                                               |
| 106.5357939                                              | 0.076799788                                                | 0.418819034                                               |
| 48.30726891                                              | 0.078782699                                                | 0.364854553                                               |
| 87.57550099                                              | 0.075881426                                                | 0.35889071                                                |
| 63.98678166                                              | 0.072151756                                                | 0.311904852                                               |
| 69.41433912                                              | 0.088446863                                                | 0.36277392                                                |
| 132.3538124                                              | 0.072819514                                                | 0.439870766                                               |
| 148.2238191                                              | 0.075379862                                                | 0.393291065                                               |
| 89.41666236                                              | 0.087638467                                                | 0.380627172                                               |
| 115.9188921                                              | 0.066084674                                                | 0.409114496                                               |
| 66.50394965                                              | 0.078871517                                                | 0.455556526                                               |
| 136.4311739                                              | 0.069839381                                                | 0.432575848                                               |
| 205.3817388                                              | 0.07257006                                                 | 0.410571                                                  |
| 154.3768462                                              | 0.069124683                                                | 0.438040475                                               |
| 94.47205338                                              | 0.067066965                                                | 0.343141246                                               |
| 136.0296523                                              | 0.067142648                                                | 0.4407795                                                 |
| 102.6165986                                              | 0.073245435                                                | 0.413800696                                               |
| 63.29237757                                              | 0.091522399                                                | 0.374147911                                               |
| 148.7703257                                              | 0.058427461                                                | 0.410065695                                               |
| 93.50038766                                              | 0.065640561                                                | 0.368039837                                               |
| 107.8606568                                              | 0.0624                                                     | 0.437511111                                               |
| 95.22008379                                              | 0.074526764                                                | 0.376035582                                               |
| 137.2749529                                              | 0.059697347                                                | 0.4104675                                                 |
| 303.1059169                                              | 0.065216247                                                | 0.40188891                                                |
| 47.78254849                                              | 0.080986369                                                | 0.317787111                                               |
| 165.8175287                                              | 0.063327032                                                | 0.476710184                                               |
| 127.5553745                                              | 0.062544029                                                | 0.416105754                                               |
| 96.92660648                                              | 0.075936846                                                | 0.379118973                                               |
| 106.0660637                                              | 0.069677524                                                | 0.363390473                                               |
| 107.3456058                                              | 0.064673745                                                | 0.393943616                                               |
| 157.8359009                                              | 0.065150278                                                | 0.377719489                                               |
| 84.24997954                                              | 0.074610871                                                | 0.430572208                                               |
| 308.4736546                                              | 0.055075673                                                | 0.406857528                                               |
| 119.0931646                                              | 0.069137084                                                | 0.396172278                                               |
| 69.22451036                                              | 0.0781893                                                  | 0.502743484                                               |
| 136.180797                                               | 0.07867329                                                 | 0.390161833                                               |
| 140.0885376                                              | 0.067277041                                                | 0.389835642                                               |
| 90.3440859                                               | 0.073921035                                                | 0.362805931                                               |
| 261.8506345                                              | 0.067485395                                                | 0.370585687                                               |
| 64.01329111                                              | 0.075190935                                                | 0.402703575                                               |
| 108.5654029                                              | 0.074959351                                                | 0.398636604                                               |
| 127.7429378                                              | 0.052491627                                                | 0.448463757                                               |
| 162.8838786                                              | 0.058466694                                                | 0.384672322                                               |
| 148.0871648                                              | 0.0596827                                                  | 0.39993361                                                |
| 123.3291354                                              | 0.062357448                                                | 0.468284611                                               |
| 180.4800023                                              | 0.081852122                                                | 0.418513108                                               |
| 175.0412339                                              | 0.066358506                                                | 0.386750873                                               |
| 213.4449876                                              | 0.061692216                                                | 0.410025938                                               |
| 161.179928                                               | 0.081840807                                                | 0.406645076                                               |
| 748.8604083                                              | 0.083476892                                                | 0.373944033                                               |
| 46.78596619                                              | 0.088979592                                                | 0.369795918                                               |
| 149.3316045                                              | 0.05973511                                                 | 0.395837913                                               |
| 111.2553683                                              | 0.072653061                                                | 0.42484898                                                |
| 193.9136766                                              | 0.066089598                                                | 0.387395836                                               |
| 105.1250572                                              | 0.071213008                                                | 0.380568443                                               |
| 147.6068499                                              | 0.059709904                                                | 0.384935022                                               |
| 127.1219268                                              | 0.069799723                                                | 0.394904253                                               |
| 107.6713099                                              | 0.074618182                                                | 0.332919008                                               |
| 133.036539                                               | 0.074590227                                                | 0.40504758                                                |
| 98.90303279                                              | 0.076902006                                                | 0.379318943                                               |
| 183.2003306                                              | 0.062593753                                                | 0.41951435                                                |
| 179.6825704                                              | 0.05597756                                                 | 0.441575725                                               |
| 104.7010555                                              | 0.069311295                                                | 0.4071809                                                 |
| 71.60456742                                              | 0.071703191                                                | 0.361687812                                               |
| 135.0219096                                              | 0.069799722                                                | 0.394862516                                               |
| 108.9884522                                              | 0.063056995                                                | 0.382565749                                               |
| 179.3245136                                              | 0.061415824                                                | 0.487971446                                               |
| 211.8898786                                              | 0.052712257                                                | 0.453097698                                               |
| 760.1847588                                              | 0.053009907                                                | 0.415826379                                               |
| 84.96199434                                              | 0.076218242                                                | 0.286963765                                               |
| 104.5732679                                              | 0.075413202                                                | 0.398455998                                               |
| 205.3332047                                              | 0.074499381                                                | 0.41020535                                                |
| 119.2995214                                              | 0.073360496                                                | 0.387318032                                               |
| 136.7167185                                              | 0.068009438                                                | 0.340395006                                               |
| 100.8665138                                              | 0.094444444                                                | 0.333888889                                               |
| 128.7765003                                              | 0.077251691                                                | 0.470986116                                               |
| 403.1966084                                              | 0.064190073                                                | 0.403804602                                               |
| 243.5236844                                              | 0.052813065                                                | 0.455322613                                               |
| 181.0933946                                              | 0.060005081                                                | 0.503175352                                               |
| 145.3137618                                              | 0.065475995                                                | 0.426519038                                               |
| 193.9928579                                              | 0.074806908                                                | 0.417882873                                               |
| 176.877205                                               | 0.050898384                                                | 0.465777297                                               |
| 214.3731416                                              | 0.06730276                                                 | 0.428730208                                               |
| 98.60805425                                              | 0.082100592                                                | 0.389792899                                               |
| 72.16336266                                              | 0.0792                                                     | 0.4208                                                    |
| 118.7416562                                              | 0.060618085                                                | 0.523150426                                               |

| log.sigma.1.0.mm.3D_glszm_SizeZoneNonUniformity | log.sigma.1.0.mm.3D_glszm_GrayLevelNonUniformity | log.sigma.1.0.mm.3D_glszm_LargeAreaEmphasis | log.sigma.1.0.mm.3D_glszm_ZoneVariance |
|-------------------------------------------------|--------------------------------------------------|---------------------------------------------|----------------------------------------|
| 103.8379447                                     | 15.35573123                                      | 62.3715415                                  | 54.58457404                            |
| 169.443418                                      | 29.147806                                        | 1106.796767                                 | 1083.787796                            |
| 94.00540541                                     | 11.98378378                                      | 38.8                                        | 33.29653762                            |
| 442.293666                                      | 55.43570058                                      | 65.31190019                                 | 58.91711735                            |
| 35.55319149                                     | 7.659574468                                      | 88.13829787                                 | 73.55239928                            |
| 87.80808081                                     | 15.54545455                                      | 79.91414141                                 | 69.36804918                            |
| 32.5                                            | 8                                                | 106.0113636                                 | 91.34594525                            |
| 157.5081081                                     | 22.80540541                                      | 38.37837838                                 | 31.04452885                            |
| 241.0675241                                     | 38.94533762                                      | 107.1720257                                 | 96.00009564                            |
| 377.9954128                                     | 59.11697248                                      | 656.5963303                                 | 643.9742814                            |
| 89.13559322                                     | 19.89830508                                      | 75.86016949                                 | 63.58049052                            |
| 209.1519507                                     | 28.96714579                                      | 196.8829569                                 | 187.6223705                            |
| 181.2362205                                     | 40.10629921                                      | 293.0787402                                 | 276.4104873                            |
| 96.14285714                                     | 22.15079365                                      | 275.7857143                                 | 256.1031116                            |
| 116.8131488                                     | 20.0449827                                       | 63.23529412                                 | 53.29861951                            |
| 368.9795687                                     | 67.66061294                                      | 11437.09989                                 | 11374.92102                            |
| 66.03867403                                     | 14.25966851                                      | 88.27624309                                 | 73.40478007                            |
| 156.8352403                                     | 33.16018307                                      | 790.9748284                                 | 762.4978295                            |
| 50.8404908                                      | 11.7607362                                       | 58.23312883                                 | 45.4842862                             |
| 158.8949772                                     | 38.73972603                                      | 2195.10274                                  | 2154.207007                            |
| 548.5188452                                     | 90.80593424                                      | 1754.073777                                 | 1736.523926                            |
| 193.8924949                                     | 37.16227181                                      | 129.4929006                                 | 117.3208695                            |
| 230.660066                                      | 53.10891089                                      | 839.3019802                                 | 818.9925307                            |
| 74.04972376                                     | 11.96132597                                      | 38.21546961                                 | 31.1533836                             |
| 146.2336449                                     | 25.31775701                                      | 311.1401869                                 | 297.0718452                            |
| 88.67804878                                     | 14.31707317                                      | 95.46341463                                 | 84.00271267                            |
| 287.810271                                      | 50.87161198                                      | 1808.524964                                 | 1784.078217                            |
| 184.8530806                                     | 29.17061611                                      | 240.1398104                                 | 228.608797                             |
| 198.3356401                                     | 38.76470588                                      | 57.06055363                                 | 47.7358778                             |
| 252.1258741                                     | 38.40559441                                      | 1231.195804                                 | 1211.446171                            |
| 347.1787843                                     | 61.45292014                                      | 742.6305125                                 | 728.2737296                            |
| 356.9371069                                     | 87.31236897                                      | 2966.719078                                 | 2928.081256                            |
| 277.6144756                                     | 39.55539143                                      | 134.0103397                                 | 124.9926057                            |
| 17.29787234                                     | 3.085106383                                      | 8.382978723                                 | 3.486645541                            |
| 65.62666667                                     | 9.36                                             | 12.97333333                                 | 8.074488889                            |
| 179.3689727                                     | 35.54926625                                      | 277.9706499                                 | 260.0371118                            |
| 370.2416851                                     | 53.84700665                                      | 455.6274945                                 | 445.4328543                            |
| 387.8227979                                     | 62.93367876                                      | 461.1129534                                 | 449.0328267                            |
| 62.60406091                                     | 15.95431472                                      | 84.06598985                                 | 66.10044062                            |
| 175.4293478                                     | 23.30434783                                      | 71.42663043                                 | 63.30103231                            |
| 171.0194647                                     | 25.70559611                                      | 323.9270073                                 | 311.0649238                            |
| 105.7741935                                     | 21.18637993                                      | 103.2437276                                 | 91.57623874                            |
| 175.5175983                                     | 33.65424431                                      | 82.67908903                                 | 71.12190459                            |
| 124.8801262                                     | 20.50157729                                      | 64.55205047                                 | 54.09692603                            |
| 225.8762542                                     | 38.95986622                                      | 66.23076923                                 | 56.36822854                            |
| 264.3713355                                     | 45.81107492                                      | 457.0716612                                 | 443.9044552                            |
| 598.4874235                                     | 81.01631543                                      | 126.2637661                                 | 117.8533719                            |
| 71.70718232                                     | 12.51381215                                      | 58.09392265                                 | 47.71911724                            |
| 27.14814815                                     | 4.222222222                                      | 27.25925926                                 | 21.10150892                            |
| 61.64556962                                     | 12.43037975                                      | 46.86708861                                 | 36.97248037                            |
| 342.665529                                      | 59.13651877                                      | 558.960182                                  | 543.7865425                            |
| 97.59479554                                     | 19.88475836                                      | 49.02230483                                 | 39.57068034                            |
| 368.362173                                      | 67.0804829                                       | 744.5583501                                 | 729.7815191                            |
| 67.25149701                                     | 12.55688623                                      | 113.251497                                  | 100.727527                             |
| 493.5121163                                     | 92.7996769                                       | 5143.732633                                 | 5115.97046                             |
| 166.3800539                                     | 19.47439353                                      | 29.90566038                                 | 24.29220944                            |
| 296.5823606                                     | 45.07782101                                      | 39.45654994                                 | 31.36617764                            |
| 167.1722488                                     | 24.94736842                                      | 85.78229665                                 | 76.21378288                            |
| 121.2857143                                     | 16.15057915                                      | 137.7760618                                 | 127.8985108                            |
| 92.90990991                                     | 18.17117117                                      | 225.2117117                                 | 209.4629697                            |
| 235.9180328                                     | 40.47868852                                      | 235.1786885                                 | 223.1116071                            |
| 626.5196335                                     | 94.26570681                                      | 655.5183246                                 | 642.6655365                            |
| 261.4727838                                     | 52.62363919                                      | 1517.682737                                 | 1494.588958                            |
| 153.6909976                                     | 34.30900243                                      | 2638.625304                                 | 2594.472351                            |
| 25.88571429                                     | 6.228571429                                      | 38.9                                        | 29.29                                  |
| 194.3564155                                     | 29.3299389                                       | 132.7107943                                 | 122.7066505                            |
| 74.34857143                                     | 12.71428571                                      | 18.4                                        | 13.33106939                            |
| 326.9620853                                     | 55.77962085                                      | 351.8708531                                 | 337.5225554                            |
| 56.70469799                                     | 10.61073826                                      | 32.73825503                                 | 23.77847845                            |
| 247.5132193                                     | 38.39346812                                      | 204.8009331                                 | 195.0195066                            |
| 318.6877323                                     | 56.3283767                                       | 406.3667906                                 | 392.1762122                            |
| 91.55272727                                     | 20.52                                            | 156.0254545                                 | 139.1706975                            |
| 437.0463392                                     | 80.48285449                                      | 1963.277108                                 | 1940.336649                            |
| 484.0109718                                     | 98.12695925                                      | 3326.932602                                 | 3299.230034                            |
| 985.8587234                                     | 147.0953191                                      | 2105.634043                                 | 2090.374215                            |
| 195.1764706                                     | 24.74208145                                      | 28.46606335                                 | 22.0910096                             |
| 134.369697                                      | 22.87272727                                      | 104.930303                                  | 93.47310376                            |
| 73.78431373                                     | 14.62745098                                      | 51.29411765                                 | 42.35284506                            |
| 194.2723577                                     | 34.34146341                                      | 150.5487805                                 | 137.6939322                            |
| 314.0864799                                     | 51.76979294                                      | 343.4177832                                 | 331.4011314                            |
| 100.0341463                                     | 12.5902439                                       | 32.91707317                                 | 26.87267103                            |
| 288.6232339                                     | 33.57770801                                      | 14.62637363                                 | 10.19458855                            |
| 424.9745597                                     | 54.17612524                                      | 129.5714286                                 | 122.1081606                            |
| 14.06122449                                     | 3.734693878                                      | 19.53061224                                 | 10.77384423                            |
| 362.9934138                                     | 68.701427                                        | 560.8594951                                 | 547.0041028                            |
| 404.4624746                                     | 73.45638945                                      | 3075.249493                                 | 3044.405326                            |
| 85.59728507                                     | 16.21266968                                      | 101.6832579                                 | 89.29030937                            |
| 171.2186879                                     | 34.20874751                                      | 54.92246521                                 | 45.4022347                             |
| 20.03333333                                     | 5.666666667                                      | 31.01666667                                 | 21.71416667                            |
| 24.96226415                                     | 4.094339623                                      | 9.41509434                                  | 5.490210039                            |
| 438.9356026                                     | 69.77460902                                      | 621.2134315                                 | 607.8408523                            |
| 131.5882353                                     | 15.26297578                                      | 37.75778547                                 | 31.78999294                            |
| 167.0542169                                     | 19.92168675                                      | 169.4698795                                 | 159.993867                             |
| 421.4008097                                     | 64.6902834                                       | 978.7692308                                 | 961.6323124                            |
| 556.2021037                                     | 99.56799399                                      | 1843.134485                                 | 1824.106275                            |
| 60.08527132                                     | 6.565891473                                      | 8.612403101                                 | 4.765939547                            |
| 146.625731                                      | 23.01754386                                      | 158.6432749                                 | 146.0012995                            |
| 20.26923077                                     | 4.269230769                                      | 14.86538462                                 | 9.270340237                            |
| 42.08                                           | 7.92                                             | 87.87                                       | 73.5059                                |
| 131.310757                                      | 15.21513944                                      | 164.2031873                                 | 153.8660656                            |

| log.sigma.1.0.mm.3D_glszm_ZonePercentage | log.sigma.1.0.mm.3D_glszm_LargeAreaLowGrayLevelEmphasis | log.sigma.1.0.mm.3D_glszm_LargeAreaHighGrayLevelEmphasis | log.sigma.1.0.mm.3D_glszm_HighGrayLevelZoneEmphasis |
|------------------------------------------|---------------------------------------------------------|----------------------------------------------------------|-----------------------------------------------------|
| 0.358356941                              | 0.681538383                                             | 6477.071146                                              | 142.3833992                                         |
| 0.20847376                               | 7.319401461                                             | 169207.0208                                              | 189.7228637                                         |
| 0.426267281                              | 0.733852666                                             | 2412.356757                                              | 114.8432432                                         |
| 0.39544592                               | 0.227124675                                             | 19421.76488                                              | 354.1564299                                         |
| 0.26183844                               | 1.243161968                                             | 7642.691489                                              | 85.79787234                                         |
| 0.307931571                              | 0.751246504                                             | 9286.757576                                              | 152.9090909                                         |
| 0.261127596                              | 0.656108829                                             | 17940.125                                                | 146.3181818                                         |
| 0.369261477                              | 0.216218484                                             | 7605.475672                                              | 232.0351351                                         |
| 0.299182299                              | 0.694442779                                             | 17905.45177                                              | 204.1061093                                         |
| 0.281471917                              | 3.004606788                                             | 144874.7856                                              | 277.440367                                          |
| 0.285368803                              | 0.930515682                                             | 6838.050847                                              | 129.1567797                                         |
| 0.328609987                              | 0.547756076                                             | 71693.74949                                              | 414.2731006                                         |
| 0.244937319                              | 3.011773171                                             | 29453.36614                                              | 135.3996063                                         |
| 0.225402504                              | 4.720060769                                             | 17389.34921                                              | 89.91269841                                         |
| 0.317233809                              | 0.458016272                                             | 9570.048443                                              | 179.3391003                                         |
| 0.126817331                              | 108.1767822                                             | 1220196.401                                              | 148.3348468                                         |
| 0.259312321                              | 2.051580327                                             | 4818.895028                                              | 72.83425414                                         |
| 0.187392796                              | 7.962697866                                             | 80847.12357                                              | 139.6956522                                         |
| 0.280068729                              | 0.814737982                                             | 5033.822086                                              | 112.208589                                          |
| 0.156372724                              | 26.03132779                                             | 188204.5388                                              | 111.5045662                                         |
| 0.238705972                              | 12.07057468                                             | 256977.8011                                              | 187.9318364                                         |
| 0.286627907                              | 0.80006861                                              | 21794.97972                                              | 220.5679513                                         |
| 0.221896741                              | 8.683439604                                             | 82267.72937                                              | 136.529703                                          |
| 0.376299376                              | 0.247948071                                             | 6652.519337                                              | 173.6685083                                         |
| 0.266611296                              | 5.475500082                                             | 18725.80374                                              | 92.75700935                                         |
| 0.295389049                              | 0.705112047                                             | 13681.69268                                              | 190.9170732                                         |
| 0.202250433                              | 6.933309877                                             | 474588.0528                                              | 304.7617689                                         |
| 0.29448709                               | 1.492883972                                             | 39338.65403                                              | 215.8649289                                         |
| 0.327478754                              | 0.495763944                                             | 7375.730104                                              | 157.532872                                          |
| 0.22501967                               | 8.242352881                                             | 185511.6224                                              | 185.5                                               |
| 0.263919472                              | 7.741778978                                             | 72232.51132                                              | 143.2252682                                         |
| 0.160876897                              | 46.84209262                                             | 190807.2642                                              | 96.5639413                                          |
| 0.333005411                              | 0.791713557                                             | 23530.10783                                              | 217.6366322                                         |
| 0.451923077                              | 0.133765249                                             | 1111.106383                                              | 137.3829787                                         |
| 0.451807229                              | 0.126336297                                             | 1882.113333                                              | 156.7666667                                         |
| 0.236138614                              | 2.429375992                                             | 33027.82218                                              | 149.21174                                           |
| 0.313194444                              | 3.160420642                                             | 66356.12306                                              | 195.2749446                                         |
| 0.28771616                               | 1.15343909                                              | 185520.486                                               | 459.8455959                                         |
| 0.235928144                              | 1.227078185                                             | 6915.781726                                              | 84.03045685                                         |
| 0.350810296                              | 0.379823329                                             | 14108.30435                                              | 234.2554348                                         |
| 0.278833107                              | 2.169645281                                             | 49368.94647                                              | 185.323601                                          |
| 0.292759706                              | 0.908377294                                             | 12704.79211                                              | 151.4229391                                         |
| 0.294153471                              | 0.554415609                                             | 13249.67909                                              | 169.3519669                                         |
| 0.309268293                              | 0.586469472                                             | 7959.454259                                              | 159.9747634                                         |
| 0.318423855                              | 0.294103457                                             | 15937.39465                                              | 247.9816054                                         |
| 0.275583483                              | 5.536258886                                             | 38565.81433                                              | 118.2752443                                         |
| 0.344819503                              | 0.311615798                                             | 52084.07614                                              | 459.874915                                          |
| 0.310463122                              | 0.445713332                                             | 8526.370166                                              | 182.9377017                                         |
| 0.402985075                              | 0.320388917                                             | 2905.092593                                              | 93.88888889                                         |
| 0.317907445                              | 0.264050375                                             | 9484.905063                                              | 200.2531646                                         |
| 0.25671729                               | 3.228428667                                             | 97964.54835                                              | 208.7042093                                         |
| 0.325272068                              | 0.434932836                                             | 6186.126394                                              | 144.267658                                          |
| 0.260141324                              | 2.024808611                                             | 275174.8159                                              | 407.6619718                                         |
| 0.282571912                              | 1.767992263                                             | 8022.107784                                              | 93.83233533                                         |
| 0.189789974                              | 40.20686644                                             | 663221.9006                                              | 159.8521809                                         |
| 0.422070535                              | 0.241086332                                             | 4592.932615                                              | 179.3530997                                         |
| 0.351573187                              | 0.256107332                                             | 7026.237354                                              | 247.5590143                                         |
| 0.323279196                              | 0.396647436                                             | 19534.20813                                              | 225.3755981                                         |
| 0.318181818                              | 0.935142298                                             | 21008.50193                                              | 175.5482625                                         |
| 0.251986379                              | 1.057738536                                             | 48860.03604                                              | 267.1261261                                         |
| 0.287871638                              | 1.082583641                                             | 52009.87213                                              | 268.1590164                                         |
| 0.278933917                              | 2.522815973                                             | 171422.7533                                              | 311.7028796                                         |
| 0.208090615                              | 7.630669655                                             | 303379.2364                                              | 244.6749611                                         |
| 0.150494324                              | 2.232879966                                             | 3125005.555                                              | 1196.6691                                           |
| 0.322580645                              | 0.977139821                                             | 2183.928571                                              | 74.7                                                |
| 0.316162267                              | 0.763805955                                             | 23764.2444                                               | 222.9633401                                         |
| 0.444162437                              | 0.142509039                                             | 3089.937143                                              | 166.9085714                                         |
| 0.263997498                              | 1.377826257                                             | 91031.38033                                              | 295.8957346                                         |
| 0.334080717                              | 0.25222407                                              | 4955.107383                                              | 165.9261745                                         |
| 0.319741422                              | 1.223319434                                             | 34932.26905                                              | 219.6360809                                         |
| 0.265460526                              | 2.960886128                                             | 57009.24164                                              | 189.7100372                                         |
| 0.243578388                              | 1.182040913                                             | 21716.45091                                              | 178.4945455                                         |
| 0.208784883                              | 13.52598821                                             | 287264.4699                                              | 194.0296571                                         |
| 0.189994044                              | 26.85757045                                             | 415336.4992                                              | 153.3487461                                         |
| 0.255991285                              | 8.983928746                                             | 496667.2894                                              | 269.7489362                                         |
| 0.396057348                              | 0.134908678                                             | 6786.830317                                              | 256.6561086                                         |
| 0.295434199                              | 0.952020876                                             | 12600.25455                                              | 152.5727273                                         |
| 0.33442623                               | 0.851261086                                             | 3734.122549                                              | 112.0784314                                         |
| 0.278911565                              | 0.991135477                                             | 24233.16667                                              | 203.2560976                                         |
| 0.288475053                              | 2.876193916                                             | 41767.80146                                              | 160.5030451                                         |
| 0.406746032                              | 0.197212897                                             | 6161.365854                                              | 238.7804878                                         |
| 0.475018643                              | 0.068234205                                             | 3846.094192                                              | 303.2574568                                         |
| 0.366045845                              | 0.125666764                                             | 135274.3043                                              | 1117.089041                                         |
| 0.337931034                              | 0.212819178                                             | 2338.918367                                              | 141.3673469                                         |
| 0.268652315                              | 4.752324531                                             | 67013.42261                                              | 157.053787                                          |
| 0.180058437                              | 11.70820133                                             | 813642.1034                                              | 302.6713996                                         |
| 0.284061697                              | 0.786692159                                             | 14106.69231                                              | 182.8687783                                         |
| 0.324097938                              | 0.302903181                                             | 10892.18688                                              | 227.1908549                                         |
| 0.327868852                              | 0.221879048                                             | 5109.783333                                              | 174.35                                              |
| 0.504761905                              | 0.114152123                                             | 1795.207547                                              | 183.4528302                                         |
| 0.273459119                              | 1.04270412                                              | 371722.5097                                              | 616.3597056                                         |
| 0.409348442                              | 0.137938288                                             | 11068.6263                                               | 341.9515571                                         |
| 0.324853229                              | 0.843550435                                             | 34766.33434                                              | 238.6716867                                         |
| 0.241564792                              | 5.674278191                                             | 170865.1883                                              | 210.9423077                                         |
| 0.229245608                              | 8.386984124                                             | 407431.6251                                              | 283.4800902                                         |
| 0.509881423                              | 0.064976904                                             | 1755.937984                                              | 243.5503876                                         |
| 0.28125                                  | 0.496648437                                             | 52669.20175                                              | 317.0994152                                         |
| 0.422764228                              | 0.136101033                                             | 2387.75                                                  | 148.4615385                                         |
| 0.263852243                              | 0.958818885                                             | 9055.52                                                  | 108.13                                              |
| 0.311028501                              | 1.601984563                                             | 17632.7012                                               | 150.2191235                                         |

| log.sigma.1.0.mm.3D_glszm_SmallAreaEmphasis | log.sigma.1.0.mm.3D_glszm_LowGrayLevelZoneEmphasis | log.sigma.1.0.mm.3D_glszm_ZoneEntropy | log.sigma.1.0.mm.3D_glszm_SmallAreaLowGrayLevelEmphasis |
|---------------------------------------------|----------------------------------------------------|---------------------------------------|---------------------------------------------------------|
| 0.664401952                                 | 0.033606385                                        | 5.708670443                           | 0.028456787                                             |
| 0.650103333                                 | 0.011876681                                        | 5.840655301                           | 0.009127743                                             |
| 0.739845663                                 | 0.044247359                                        | 5.254067866                           | 0.035699759                                             |
| 0.677252118                                 | 0.005371176                                        | 6.174677185                           | 0.004146822                                             |
| 0.626711906                                 | 0.052359967                                        | 5.050993529                           | 0.041094033                                             |
| 0.691987348                                 | 0.016281371                                        | 5.30162796                            | 0.013396419                                             |
| 0.628579446                                 | 0.022620825                                        | 5.186078068                           | 0.019558255                                             |
| 0.677511102                                 | 0.009838845                                        | 5.763264838                           | 0.007979848                                             |
| 0.647071014                                 | 0.010840373                                        | 6.004455773                           | 0.008288274                                             |
| 0.684701862                                 | 0.006670265                                        | 5.816870823                           | 0.005052866                                             |
| 0.638911567                                 | 0.018323821                                        | 5.51496311                            | 0.014372838                                             |
| 0.681051797                                 | 0.005676092                                        | 5.940379919                           | 0.004718773                                             |
| 0.618028944                                 | 0.015734604                                        | 5.78951887                            | 0.011523786                                             |
| 0.640819251                                 | 0.030346211                                        | 5.389975399                           | 0.024176673                                             |
| 0.660879273                                 | 0.017650391                                        | 5.701864066                           | 0.015099712                                             |
| 0.672843097                                 | 0.015251446                                        | 5.727320639                           | 0.011098226                                             |
| 0.627336042                                 | 0.075593455                                        | 5.481352735                           | 0.062900192                                             |
| 0.621929441                                 | 0.015621755                                        | 5.80481871                            | 0.011400194                                             |
| 0.577688078                                 | 0.031490044                                        | 5.677574933                           | 0.024409847                                             |
| 0.624352737                                 | 0.021319193                                        | 5.588101864                           | 0.016300163                                             |
| 0.689680889                                 | 0.009946276                                        | 5.720343199                           | 0.007622672                                             |
| 0.650887718                                 | 0.008408944                                        | 5.746972014                           | 0.006224094                                             |
| 0.640496221                                 | 0.013321048                                        | 5.584555765                           | 0.009504935                                             |
| 0.661554461                                 | 0.017504438                                        | 5.52071222                            | 0.014623336                                             |
| 0.701342697                                 | 0.037793645                                        | 5.313907372                           | 0.030745152                                             |
| 0.682672406                                 | 0.017122386                                        | 5.527200917                           | 0.014372411                                             |
| 0.666185056                                 | 0.006205856                                        | 5.848574746                           | 0.004872808                                             |
| 0.687785204                                 | 0.009993525                                        | 5.591460737                           | 0.007907753                                             |
| 0.604248482                                 | 0.015429602                                        | 5.993040021                           | 0.011542946                                             |
| 0.690461168                                 | 0.010824867                                        | 5.67724823                            | 0.008224381                                             |
| 0.66889383                                  | 0.014965294                                        | 5.74955441                            | 0.01098168                                              |
| 0.635658891                                 | 0.022042967                                        | 5.705898286                           | 0.015613455                                             |
| 0.665635061                                 | 0.01323306                                         | 6.046984093                           | 0.010866292                                             |
| 0.625218167                                 | 0.040454954                                        | 5.096934064                           | 0.031756218                                             |
| 0.685550577                                 | 0.025309511                                        | 5.44867556                            | 0.021757067                                             |
| 0.637638061                                 | 0.014173585                                        | 5.770687393                           | 0.010676614                                             |
| 0.666372348                                 | 0.011459796                                        | 6.032589967                           | 0.007822824                                             |
| 0.658808895                                 | 0.003694649                                        | 5.910504602                           | 0.002844715                                             |
| 0.584429704                                 | 0.044114569                                        | 5.688715794                           | 0.03657335                                              |
| 0.716792138                                 | 0.00940744                                         | 5.621126365                           | 0.007886601                                             |
| 0.670541432                                 | 0.013392218                                        | 5.803377361                           | 0.01042265                                              |
| 0.638590913                                 | 0.016073552                                        | 5.659438758                           | 0.012495595                                             |
| 0.62623491                                  | 0.01238506                                         | 5.945291745                           | 0.009193944                                             |
| 0.652641776                                 | 0.020856479                                        | 5.882856136                           | 0.01732308                                              |
| 0.638083789                                 | 0.007680697                                        | 6.017620041                           | 0.005873275                                             |
| 0.682311494                                 | 0.02114005                                         | 5.640362508                           | 0.016321886                                             |
| 0.66302173                                  | 0.003912296                                        | 6.238777071                           | 0.003035307                                             |
| 0.65350457                                  | 0.015925767                                        | 5.572649469                           | 0.013383987                                             |
| 0.732243029                                 | 0.064344                                           | 4.759064585                           | 0.060161814                                             |
| 0.64726159                                  | 0.013718617                                        | 5.331168796                           | 0.011079911                                             |
| 0.648936113                                 | 0.008625499                                        | 5.934394607                           | 0.006279041                                             |
| 0.62456217                                  | 0.016993265                                        | 5.717718442                           | 0.013072642                                             |
| 0.632024407                                 | 0.004019426                                        | 6.046119979                           | 0.002968552                                             |
| 0.657236042                                 | 0.038054996                                        | 5.335039877                           | 0.030462625                                             |
| 0.655945387                                 | 0.011529435                                        | 5.835550739                           | 0.00801634                                              |
| 0.695517708                                 | 0.031248154                                        | 5.844817719                           | 0.028240441                                             |
| 0.643907372                                 | 0.008565381                                        | 6.147169256                           | 0.006519104                                             |
| 0.65741617                                  | 0.011137364                                        | 5.94327525                            | 0.008930024                                             |
| 0.711004506                                 | 0.019591009                                        | 5.521065153                           | 0.017403288                                             |
| 0.672446467                                 | 0.010291823                                        | 5.421594748                           | 0.008889967                                             |
| 0.64568844                                  | 0.007163545                                        | 5.906394749                           | 0.005468702                                             |
| 0.666091069                                 | 0.005291314                                        | 6.123645454                           | 0.003899938                                             |
| 0.663098145                                 | 0.007352144                                        | 5.632309216                           | 0.005687277                                             |
| 0.635643127                                 | 0.003357386                                        | 5.710055007                           | 0.00305094                                              |
| 0.624473591                                 | 0.063666448                                        | 4.862553953                           | 0.048876346                                             |
| 0.653292166                                 | 0.010336767                                        | 5.958948074                           | 0.00812342                                              |
| 0.67487897                                  | 0.018070074                                        | 5.379025542                           | 0.015208256                                             |
| 0.647226724                                 | 0.005801087                                        | 6.019426871                           | 0.004322168                                             |
| 0.636723131                                 | 0.017987992                                        | 5.446021496                           | 0.014858277                                             |
| 0.644721241                                 | 0.01173315                                         | 6.087610358                           | 0.009273906                                             |
| 0.652818395                                 | 0.011167272                                        | 5.833047495                           | 0.008527222                                             |
| 0.597489137                                 | 0.012792775                                        | 5.863071716                           | 0.009833264                                             |
| 0.66159722                                  | 0.010571589                                        | 5.837816039                           | 0.008050197                                             |
| 0.638231623                                 | 0.012604272                                        | 5.865362704                           | 0.009287939                                             |
| 0.673384075                                 | 0.007016525                                        | 6.065128811                           | 0.005386177                                             |
| 0.690632994                                 | 0.010307468                                        | 5.917326021                           | 0.008575868                                             |
| 0.662619259                                 | 0.018086833                                        | 5.656234324                           | 0.014623936                                             |
| 0.622079769                                 | 0.034418231                                        | 5.557999978                           | 0.027455089                                             |
| 0.651917613                                 | 0.011946814                                        | 5.815571885                           | 0.009633675                                             |
| 0.642316464                                 | 0.015359954                                        | 6.066117758                           | 0.011658407                                             |
| 0.725037731                                 | 0.0122416                                          | 5.479508106                           | 0.01039727                                              |
| 0.69969953                                  | 0.009156853                                        | 5.949698887                           | 0.007863586                                             |
| 0.670503978                                 | 0.001985408                                        | 6.213439849                           | 0.00165973                                              |
| 0.545927306                                 | 0.037899375                                        | 5.068691732                           | 0.032894172                                             |
| 0.655892936                                 | 0.012954737                                        | 5.784759791                           | 0.009858688                                             |
| 0.665759569                                 | 0.005442025                                        | 5.836479078                           | 0.004088914                                             |
| 0.646272662                                 | 0.014606928                                        | 5.634542388                           | 0.011986894                                             |
| 0.60464706                                  | 0.008688806                                        | 5.996057894                           | 0.006632649                                             |
| 0.586978251                                 | 0.023858054                                        | 4.764735179                           | 0.021107739                                             |
| 0.712012906                                 | 0.065571475                                        | 4.722557954                           | 0.063711095                                             |
| 0.660896161                                 | 0.002979951                                        | 6.059360949                           | 0.002394534                                             |
| 0.699671571                                 | 0.0083036                                          | 5.804328365                           | 0.007161452                                             |
| 0.736015152                                 | 0.01001655                                         | 5.574601055                           | 0.008512094                                             |
| 0.679333295                                 | 0.010475669                                        | 5.919651088                           | 0.007697606                                             |
| 0.672310931                                 | 0.005731917                                        | 5.825050418                           | 0.004286648                                             |
| 0.709119294                                 | 0.017432494                                        | 5.509197221                           | 0.015395861                                             |
| 0.679147499                                 | 0.009075745                                        | 5.777024993                           | 0.00710995                                              |
| 0.646707439                                 | 0.02962621                                         | 4.796217603                           | 0.025940024                                             |
| 0.672067143                                 | 0.049170183                                        | 5.148019751                           | 0.044471913                                             |
| 0.749650195                                 | 0.02307652                                         | 5.459408188                           | 0.019472486                                             |



| log.sigma.1.0.mm.3D_ngtdm_Coarseness | log.sigma.1.0.mm.3D_ngtdm_Complexity | log.sigma.1.0.mm.3D_ngtdm_Strength | log.sigma.1.0.mm.3D_ngtdm_Busyness | log.sigma.1.0.mm.3D_ngtdm_Contrast |
|--------------------------------------|--------------------------------------|------------------------------------|------------------------------------|------------------------------------|
| 0.009015266                          | 0.750100065                          | 1.257228276                        | 0.470006909                        | 0.00022163                         |
| 0.003625087                          | 0.170462879                          | 0.570592867                        | 0.760193497                        | 2.68E-05                           |
| 0.014831597                          | 1.088045964                          | 2.06015948                         | 0.393410221                        | 0.000394649                        |
| 0.002659575                          | 0.490690762                          | 0.827698725                        | 0.539204807                        | 3.91E-05                           |
| 0.015840262                          | 0.638170702                          | 1.685287195                        | 0.372538739                        | 0.000277276                        |
| 0.009723021                          | 0.549602972                          | 1.216768241                        | 0.388160678                        | 0.000134122                        |
| 0.018916195                          | 0.684993819                          | 1.988309433                        | 0.198522646                        | 0.000253614                        |
| 0.006183599                          | 0.655514409                          | 1.100528117                        | 0.429485823                        | 0.00013081                         |
| 0.003267137                          | 0.294788816                          | 0.635974982                        | 0.762540345                        | 4.05E-05                           |
| 0.002326392                          | 0.239633625                          | 0.636690214                        | 0.731790663                        | 1.77E-05                           |
| 0.007356318                          | 0.33170109                           | 0.72794937                         | 0.659883347                        | 0.000109326                        |
| 0.004882777                          | 0.683576624                          | 1.407873341                        | 0.270915928                        | 5.83E-05                           |
| 0.003148075                          | 0.206807943                          | 0.628388564                        | 1.058725624                        | 2.54E-05                           |
| 0.005889115                          | 0.161514319                          | 0.433551651                        | 1.178380317                        | 7.76E-05                           |
| 0.006855735                          | 0.45830527                           | 1.005026798                        | 0.472955073                        | 0.000104038                        |
| 0.000957786                          | 0.051512534                          | 0.36376578                         | 2.506589278                        | 2.38E-06                           |
| 0.009082799                          | 0.23980817                           | 0.558979586                        | 1.061268255                        | 0.000200487                        |
| 0.003132822                          | 0.137338396                          | 0.45249473                         | 1.132676438                        | 2.16E-05                           |
| 0.01121851                           | 0.536215954                          | 1.164186377                        | 0.455154808                        | 0.000202901                        |
| 0.002669056                          | 0.066640693                          | 0.289676482                        | 1.619268281                        | 1.29E-05                           |
| 0.001406697                          | 0.108881122                          | 0.334245294                        | 1.574491656                        | 7.94E-06                           |
| 0.003825199                          | 0.261106747                          | 0.67335558                         | 0.734153332                        | 4.39E-05                           |
| 0.002567146                          | 0.083855409                          | 0.261369996                        | 1.712139188                        | 2.17E-05                           |
| 0.0136257                            | 1.147662829                          | 2.061616021                        | 0.220025791                        | 0.000257353                        |
| 0.005568155                          | 0.285088295                          | 0.838141738                        | 0.901956387                        | 5.86E-05                           |
| 0.010073574                          | 0.644614413                          | 1.376682043                        | 0.315910469                        | 0.000144663                        |
| 0.002149808                          | 0.157599401                          | 0.592798483                        | 0.744736684                        | 9.72E-06                           |
| 0.00501679                           | 0.361544279                          | 0.961911841                        | 0.487754603                        | 4.56E-05                           |
| 0.003820688                          | 0.235987019                          | 0.468440735                        | 0.998440917                        | 6.90E-05                           |
| 0.002969052                          | 0.156355181                          | 0.585947977                        | 0.867857344                        | 1.81E-05                           |
| 0.002259347                          | 0.169596951                          | 0.537511372                        | 1.25580916                         | 1.46E-05                           |
| 0.00124019                           | 0.04083667                           | 0.206664565                        | 3.352679165                        | 4.72E-06                           |
| 0.003340784                          | 0.431468769                          | 0.845433462                        | 0.635167285                        | 4.50E-05                           |
| 0.005006262                          | 4.262913714                          | 6.866007827                        | 0.083586378                        | 0.002014122                        |
| 0.017214985                          | 1.49786059                           | 2.140849455                        | 0.241056994                        | 0.000631528                        |
| 0.003258609                          | 0.172894482                          | 0.424989237                        | 1.145948607                        | 3.92E-05                           |
| 0.002413889                          | 0.235972801                          | 0.517542422                        | 1.03781896                         | 2.95E-05                           |
| 0.002039213                          | 0.212354409                          | 0.490760725                        | 0.720557712                        | 2.13E-05                           |
| 0.007281034                          | 0.233043513                          | 0.543192441                        | 0.906788233                        | 0.00012083                         |
| 0.006315402                          | 0.642344124                          | 1.284725343                        | 0.3712769                          | 9.16E-05                           |
| 0.005083201                          | 0.317139581                          | 0.75122484                         | 0.556941133                        | 5.61E-05                           |
| 0.007035733                          | 0.324507436                          | 0.726487907                        | 0.627612867                        | 0.000121136                        |
| 0.003998594                          | 0.282427957                          | 0.586866886                        | 0.78040482                         | 5.67E-05                           |
| 0.006540374                          | 0.560754628                          | 1.137982766                        | 0.467212256                        | 9.45E-05                           |
| 0.003439792                          | 0.411120891                          | 0.869429553                        | 0.543309671                        | 3.87E-05                           |
| 0.003187527                          | 0.162893106                          | 0.47396723                         | 1.274691271                        | 2.91E-05                           |
| 0.00162378                           | 0.358498869                          | 0.721732004                        | 0.626821272                        | 1.57E-05                           |
| 0.01028948                           | 0.698236642                          | 1.33286748                         | 0.379498018                        | 0.00022311                         |
| 0.043117954                          | 1.476003827                          | 3.631719632                        | 0.127607546                        | 0.000869544                        |
| 0.011601159                          | 0.80949214                           | 1.564940479                        | 0.281553042                        | 0.000252246                        |
| 0.002082727                          | 0.163436147                          | 0.438103375                        | 1.073380526                        | 1.59E-05                           |
| 0.007226412                          | 0.490207145                          | 0.928250847                        | 0.55571293                         | 0.000141864                        |
| 0.001836331                          | 0.183887023                          | 0.51302222                         | 0.7620586                          | 1.37E-05                           |
| 0.011070003                          | 0.445584759                          | 1.029146147                        | 0.524332358                        | 0.000162768                        |
| 0.001058107                          | 0.054663322                          | 0.237881962                        | 2.461088306                        | 5.25E-06                           |
| 0.007223016                          | 0.865073376                          | 1.223418778                        | 0.426847847                        | 0.000207628                        |
| 0.002908662                          | 0.460719662                          | 0.781899605                        | 0.686812037                        | 4.57E-05                           |
| 0.005114836                          | 0.50408127                           | 1.003566299                        | 0.426000874                        | 7.95E-05                           |
| 0.009035587                          | 0.601451066                          | 1.566621169                        | 0.309700744                        | 0.000103927                        |
| 0.007318263                          | 0.322075761                          | 1.056105737                        | 0.419455616                        | 8.55E-05                           |
| 0.003278814                          | 0.288475335                          | 0.654963213                        | 0.640548865                        | 3.55E-05                           |
| 0.001325349                          | 0.160831232                          | 0.425789358                        | 1.104555762                        | 9.38E-06                           |
| 0.002316469                          | 0.123785451                          | 0.491259858                        | 0.89624664                         | 1.11E-05                           |
| 0.002595976                          | 0.191881105                          | 1.604436213                        | 0.309470288                        | 1.04E-05                           |
| 0.028606326                          | 0.650848962                          | 1.474462231                        | 0.383156615                        | 0.000791139                        |
| 0.004842957                          | 0.423759551                          | 0.958351158                        | 0.462180431                        | 5.25E-05                           |
| 0.013305822                          | 1.338629193                          | 1.821885026                        | 0.275688021                        | 0.000478989                        |
| 0.002154334                          | 0.185740598                          | 0.480059087                        | 0.883934953                        | 2.04E-05                           |
| 0.013195864                          | 0.903046836                          | 1.654749964                        | 0.282449473                        | 0.000285511                        |
| 0.003601122                          | 0.348328142                          | 0.773022246                        | 0.643415606                        | 4.42E-05                           |
| 0.002269698                          | 0.151910534                          | 0.383874943                        | 1.230871733                        | 2.13E-05                           |
| 0.005702737                          | 0.343782977                          | 0.833676605                        | 0.562116283                        | 6.69E-05                           |
| 0.001404059                          | 0.093313844                          | 0.326287792                        | 1.612542936                        | 7.21E-06                           |
| 0.001101669                          | 0.071508851                          | 0.318693342                        | 2.180748336                        | 4.40E-06                           |
| 0.000827656                          | 0.087128426                          | 0.264382841                        | 1.783012687                        | 4.49E-06                           |
| 0.005596358                          | 1.059001415                          | 1.652482717                        | 0.314498645                        | 0.000101026                        |
| 0.005600388                          | 0.409764987                          | 0.842139514                        | 0.612773655                        | 7.96E-05                           |
| 0.00976026                           | 0.587234863                          | 0.9950484                          | 0.595925978                        | 0.00024779                         |
| 0.003725422                          | 0.25816645                           | 0.564072354                        | 0.794917007                        | 4.97E-05                           |
| 0.00241625                           | 0.263704182                          | 0.627756315                        | 1.034661054                        | 2.30E-05                           |
| 0.012710911                          | 1.245028292                          | 2.156340822                        | 0.212747217                        | 0.000278926                        |
| 0.004473601                          | 0.882909022                          | 1.172215864                        | 0.42359837                         | 0.000125064                        |
| 0.002696881                          | 0.530945956                          | 1.161211392                        | 0.252168953                        | 3.04E-05                           |
| 0.047219584                          | 1.743315266                          | 4.598772999                        | 0.094852652                        | 0.000793137                        |
| 0.002017296                          | 0.133482905                          | 0.359276399                        | 1.436927132                        | 1.62E-05                           |
| 0.001328789                          | 0.118205642                          | 0.527071452                        | 1.030345041                        | 4.35E-06                           |
| 0.007949907                          | 0.590876804                          | 1.251423144                        | 0.400220744                        | 0.000109848                        |
| 0.004035027                          | 0.322719266                          | 0.616384789                        | 0.702955325                        | 7.57E-05                           |
| 0.033702853                          | 1.073226161                          | 2.510142001                        | 0.153627415                        | 0.000797119                        |
| 0.041321995                          | 3.538026788                          | 5.243086653                        | 0.09610513                         | 0.003026463                        |
| 0.001785309                          | 0.279227905                          | 0.9153224                          | 0.487890686                        | 1.06E-05                           |
| 0.009614777                          | 1.483417047                          | 2.48930489                         | 0.18115857                         | 0.00018517                         |
| 0.007152239                          | 0.648857692                          | 1.44170722                         | 0.289039232                        | 7.38E-05                           |
| 0.001773825                          | 0.174765674                          | 0.502888867                        | 1.068872993                        | 1.12E-05                           |
| 0.001241726                          | 0.122628145                          | 0.442825433                        | 1.212033232                        | 5.30E-06                           |
| 0.02302026                           | 3.675591605                          | 4.428255768                        | 1.30868289                         | 0.001054521                        |
| 0.00572513                           | 0.589169705                          | 1.716472013                        | 0.266924189                        | 5.15E-05                           |
| 0.042389146                          | 2.127007119                          | 3.611103637                        | 0.142701201                        | 0.001984948                        |
| 0.016655862                          | 0.744019168                          | 2.066413163                        | 0.263976232                        | 0.000209326                        |
| 0.009218406                          | 0.733991392                          | 1.864628921                        | 0.342480994                        | 0.000111222                        |

| log.sigma.0.5.mm.3D_gldm_GrayLevelVariance | log.sigma.0.5.mm.3D_gldm_HighGrayLevelEmphasis | log.sigma.0.5.mm.3D_gldm_GrayLevelNonUniformityNormalized | log.sigma.0.5.mm.3D_gldm_DependenceEntropy |
|--------------------------------------------|------------------------------------------------|-----------------------------------------------------------|--------------------------------------------|
| 0.89305949                                 | 13.14305949                                    | 0.302430001                                               | 5.285923144                                |
| 0.57410727                                 | 12.68464131                                    | 0.384433077                                               | 5.284443385                                |
| 0.945592389                                | 7.115207373                                    | 0.327029667                                               | 5.206377537                                |
| 1.130641165                                | 31.8857685                                     | 0.280105427                                               | 5.521042325                                |
| 0.485967676                                | 7.038997214                                    | 0.41515041                                                | 5.083446432                                |
| 0.563774492                                | 12.67807154                                    | 0.37586498                                                | 5.153434                                   |
| 0.517042503                                | 12.73590504                                    | 0.419084433                                               | 4.776084114                                |
| 0.878574189                                | 21.24550898                                    | 0.300429082                                               | 5.435911795                                |
| 0.74592879                                 | 20.65752766                                    | 0.332447219                                               | 5.382018978                                |
| 0.697896267                                | 20.54034861                                    | 0.363820595                                               | 5.317315798                                |
| 0.489890032                                | 12.43288996                                    | 0.397586592                                               | 5.033550276                                |
| 0.974952694                                | 30.86234818                                    | 0.318331904                                               | 5.430060507                                |
| 0.499457628                                | 12.87126326                                    | 0.40007802                                                | 5.165167849                                |
| 0.443173345                                | 6.720035778                                    | 0.413169121                                               | 5.248955748                                |
| 0.609631519                                | 13.00219539                                    | 0.366872269                                               | 5.093533112                                |
| 0.412950434                                | 12.42680294                                    | 0.444399533                                               | 5.078622096                                |
| 0.527737171                                | 6.706303725                                    | 0.380477172                                               | 5.350492377                                |
| 0.481529816                                | 12.77058319                                    | 0.405411399                                               | 5.134095494                                |
| 0.644362372                                | 13.3556701                                     | 0.348082805                                               | 5.314335725                                |
| 0.373819928                                | 12.48054266                                    | 0.448379289                                               | 5.100834588                                |
| 0.53554894                                 | 12.33116386                                    | 0.402382235                                               | 5.155267468                                |
| 0.603178745                                | 21.2                                           | 0.372457409                                               | 5.200280301                                |
| 0.42021243                                 | 12.22702307                                    | 0.441309693                                               | 5.235016005                                |
| 0.794567797                                | 13.50727651                                    | 0.326446549                                               | 5.448503813                                |
| 0.526905746                                | 6.316445183                                    | 0.416043973                                               | 5.208025936                                |
| 0.73691543                                 | 12.60662824                                    | 0.339688063                                               | 5.170110065                                |
| 0.51087258                                 | 20.46335834                                    | 0.407935766                                               | 5.181372633                                |
| 0.651743447                                | 20.14584787                                    | 0.388117492                                               | 5.254853492                                |
| 0.721981237                                | 13.34560907                                    | 0.330537602                                               | 5.48982211                                 |
| 0.544833887                                | 12.2368214                                     | 0.402067918                                               | 5.195851888                                |
| 0.55412619                                 | 12.23938345                                    | 0.411452813                                               | 5.190076893                                |
| 0.363712253                                | 6.529679595                                    | 0.453508299                                               | 5.159271754                                |
| 0.902881598                                | 21.31923266                                    | 0.305721701                                               | 5.443132533                                |
| 0.974852071                                | 13.76923077                                    | 0.337093195                                               | 4.56612707                                 |
| 0.99545471                                 | 13.52108434                                    | 0.285146611                                               | 5.29532188                                 |
| 0.562535781                                | 12.68465347                                    | 0.372411528                                               | 5.224211326                                |
| 0.816384549                                | 12.84861111                                    | 0.335465856                                               | 5.357281745                                |
| 0.703695496                                | 30.84883721                                    | 0.347073369                                               | 5.294746247                                |
| 0.450752626                                | 6.97005988                                     | 0.413870702                                               | 5.093997363                                |
| 0.796685935                                | 20.84556721                                    | 0.322854123                                               | 5.26384972                                 |
| 0.711163561                                | 12.87109905                                    | 0.343268854                                               | 5.452083177                                |
| 0.627454694                                | 12.75655824                                    | 0.358755529                                               | 5.323744036                                |
| 0.663838327                                | 20.76065773                                    | 0.346941803                                               | 5.332957257                                |
| 0.7767605                                  | 13.08487805                                    | 0.328150387                                               | 5.413847871                                |
| 0.742090752                                | 20.71033014                                    | 0.338587263                                               | 5.309701953                                |
| 0.545954016                                | 12.67998205                                    | 0.392554448                                               | 5.11649831                                 |
| 0.978065808                                | 43.51500234                                    | 0.30203548                                                | 5.471312966                                |
| 0.712997479                                | 12.88507719                                    | 0.342738365                                               | 5.199778726                                |
| 0.592382515                                | 13.05223881                                    | 0.420249499                                               | 4.544321636                                |
| 0.696452356                                | 21.08249497                                    | 0.359667057                                               | 5.196486016                                |
| 0.601499039                                | 20.74649533                                    | 0.370277631                                               | 5.217225931                                |
| 0.673353521                                | 12.59129383                                    | 0.338808561                                               | 5.166772129                                |
| 0.657585551                                | 30.76812353                                    | 0.355174688                                               | 5.313985754                                |
| 0.531600631                                | 7.042301184                                    | 0.385440376                                               | 4.985236623                                |
| 0.496029886                                | 12.65338035                                    | 0.403429824                                               | 5.078172726                                |
| 1.134187805                                | 13.17406143                                    | 0.267926501                                               | 5.50357309                                 |
| 0.976677232                                | 21.34792522                                    | 0.284010456                                               | 5.600886226                                |
| 0.845412474                                | 21.46249033                                    | 0.332908654                                               | 5.282386257                                |
| 0.716226781                                | 12.79484029                                    | 0.346539973                                               | 5.239665658                                |
| 0.473623385                                | 20.42338252                                    | 0.418094957                                               | 5.052891225                                |
| 0.707692219                                | 20.6720151                                     | 0.340809828                                               | 5.24144522                                 |
| 0.730421703                                | 20.91967871                                    | 0.345985889                                               | 5.496926813                                |
| 0.461001561                                | 20.69935275                                    | 0.421578743                                               | 5.08111803                                 |
| 0.462110911                                | 90.40278286                                    | 0.430941999                                               | 5.156274461                                |
| 0.590583788                                | 6.737327189                                    | 0.359213404                                               | 4.961286788                                |
| 0.800221742                                | 21.76046362                                    | 0.324771572                                               | 5.329931984                                |
| 0.909119019                                | 12.96446701                                    | 0.295730372                                               | 5.134843376                                |
| 0.657867102                                | 20.87269315                                    | 0.35389635                                                | 5.302039554                                |
| 0.683162742                                | 12.6367713                                     | 0.339299001                                               | 5.096937439                                |
| 0.844728929                                | 21.09696668                                    | 0.322400096                                               | 5.330506285                                |
| 0.591619525                                | 12.68782895                                    | 0.375555532                                               | 5.360400819                                |
| 0.564334585                                | 12.59521701                                    | 0.377595731                                               | 5.213636549                                |
| 0.512331782                                | 12.51973684                                    | 0.410679272                                               | 5.190409692                                |
| 0.455238213                                | 12.32980941                                    | 0.426413406                                               | 5.149831862                                |
| 0.670813742                                | 21.08191721                                    | 0.363663287                                               | 5.289527748                                |
| 1.054897162                                | 20.9516129                                     | 0.282354415                                               | 5.319896516                                |
| 0.643214775                                | 12.70904208                                    | 0.354892125                                               | 5.333577411                                |
| 0.710370868                                | 12.46065574                                    | 0.329174953                                               | 5.287582463                                |
| 0.63108832                                 | 20.28854875                                    | 0.360358467                                               | 5.248759248                                |
| 0.71404232                                 | 12.566409                                      | 0.347583792                                               | 5.379072799                                |
| 0.928177753                                | 20.36507937                                    | 0.301634543                                               | 5.435789047                                |
| 1.303384732                                | 21.8463833                                     | 0.247074289                                               | 5.482970693                                |
| 1.148495805                                | 92.50429799                                    | 0.282507687                                               | 5.460240291                                |
| 0.590535077                                | 13.8                                           | 0.393198573                                               | 4.793688955                                |
| 0.542870563                                | 12.68062518                                    | 0.385736056                                               | 5.258057941                                |
| 0.471418511                                | 30.53889701                                    | 0.42475353                                                | 5.19712714                                 |
| 0.591479372                                | 12.69794344                                    | 0.368689739                                               | 5.173073099                                |
| 0.75575666                                 | 20.75708763                                    | 0.325619088                                               | 5.272550425                                |
| 0.645226791                                | 13.57377049                                    | 0.349099704                                               | 5.072584999                                |
| 1.123446712                                | 20.9047619                                     | 0.361088435                                               | 4.5633354                                  |
| 0.705845497                                | 42.98037736                                    | 0.355193861                                               | 5.283535379                                |
| 1.164444476                                | 30.77903683                                    | 0.278426919                                               | 5.348209957                                |
| 0.761479352                                | 20.69569472                                    | 0.333770551                                               | 5.352877037                                |
| 0.627432643                                | 20.66454768                                    | 0.371360047                                               | 5.333813671                                |
| 0.532294                                   | 20.57819497                                    | 0.402396454                                               | 5.090093748                                |
| 1.574309863                                | 21.27667984                                    | 0.225577653                                               | 5.466748802                                |
| 0.710801566                                | 31.36924342                                    | 0.371778155                                               | 5.216038592                                |
| 0.727477031                                | 13.69918699                                    | 0.330689404                                               | 4.883112731                                |
| 0.513864426                                | 13.27704485                                    | 0.420597183                                               | 4.955039707                                |
| 0.846904947                                | 12.96282528                                    | 0.333634293                                               | 5.43803936                                 |

| log.sigma.0.5.mm.3D_gldm_DependenceNonUniformity | log.sigma.0.5.mm.3D_gldm_GrayLevelNonUniformity | log.sigma.0.5.mm.3D_gldm_SmallDependenceEmphasis |
|--------------------------------------------------|-------------------------------------------------|--------------------------------------------------|
| 49.14730878                                      | 213.515807                                      | 0.075914433                                      |
| 128.8334136                                      | 798.4675012                                     | 0.046017824                                      |
| 29.13824885                                      | 141.9308756                                     | 0.105339503                                      |
| 194.1149905                                      | 738.0777989                                     | 0.077822511                                      |
| 23.18941504                                      | 149.0389972                                     | 0.048883343                                      |
| 39.17418351                                      | 241.681182                                      | 0.06591878                                       |
| 25.89614243                                      | 141.231454                                      | 0.049994741                                      |
| 68.40319361                                      | 301.0299401                                     | 0.057308414                                      |
| 136.0976431                                      | 691.1577682                                     | 0.056910802                                      |
| 182.9632021                                      | 1127.116204                                     | 0.060010332                                      |
| 54.61305925                                      | 328.8041112                                     | 0.056008766                                      |
| 96.21322537                                      | 471.7678812                                     | 0.069625466                                      |
| 137.924783                                       | 829.7618129                                     | 0.048378004                                      |
| 63.93023256                                      | 461.9230769                                     | 0.039638454                                      |
| 66.27332602                                      | 334.2206367                                     | 0.064898676                                      |
| 479.9074421                                      | 3087.243558                                     | 0.032055278                                      |
| 40.14899713                                      | 265.5730659                                     | 0.047874471                                      |
| 143.2898799                                      | 945.4193825                                     | 0.037948451                                      |
| 35.62542955                                      | 202.5841924                                     | 0.045496068                                      |
| 171.7118886                                      | 1255.910389                                     | 0.030811752                                      |
| 290.6068147                                      | 2102.044793                                     | 0.057590194                                      |
| 113.7988372                                      | 640.6267442                                     | 0.052457989                                      |
| 140.0750641                                      | 1205.21677                                      | 0.047102086                                      |
| 31.58627859                                      | 157.02079                                       | 0.075152276                                      |
| 65.93023256                                      | 500.9169435                                     | 0.062389291                                      |
| 41.38616715                                      | 235.7435159                                     | 0.070046845                                      |
| 215.5845355                                      | 1413.905366                                     | 0.042805466                                      |
| 79.76482903                                      | 556.1723657                                     | 0.066252493                                      |
| 115.2164306                                      | 583.3988669                                     | 0.064965154                                      |
| 147.8182533                                      | 1022.056648                                     | 0.048921314                                      |
| 170.9471532                                      | 1308.008493                                     | 0.06683401                                       |
| 369.7001686                                      | 2689.304216                                     | 0.036728709                                      |
| 138.9557304                                      | 621.5322184                                     | 0.065910007                                      |
| 10.21153846                                      | 35.05769231                                     | 0.08475413                                       |
| 25.25301205                                      | 94.6686747                                      | 0.099061247                                      |
| 136.8811881                                      | 752.2712871                                     | 0.048431046                                      |
| 182.9868056                                      | 966.1416667                                     | 0.067465911                                      |
| 213.0316041                                      | 1164.084079                                     | 0.056073317                                      |
| 56.04670659                                      | 345.5820359                                     | 0.046754201                                      |
| 68.07530982                                      | 338.6739752                                     | 0.076117465                                      |
| 91.70420624                                      | 505.9782904                                     | 0.056851169                                      |
| 56.11857293                                      | 341.8940189                                     | 0.06196868                                       |
| 112.8258222                                      | 569.6784409                                     | 0.052271565                                      |
| 67.33756098                                      | 336.3541463                                     | 0.059388046                                      |
| 131.7784878                                      | 635.8668797                                     | 0.062488922                                      |
| 133.4165171                                      | 874.6113106                                     | 0.065881976                                      |
| 294.03188                                        | 1288.483357                                     | 0.075329011                                      |
| 35.46998285                                      | 199.8164666                                     | 0.070977253                                      |
| 11.98507463                                      | 56.31343284                                     | 0.054796359                                      |
| 34.60160966                                      | 178.7545272                                     | 0.06992657                                       |
| 233.5706776                                      | 1267.830607                                     | 0.053866301                                      |
| 57.1668682                                       | 280.1946796                                     | 0.062640246                                      |
| 248.8958388                                      | 1357.122481                                     | 0.053052696                                      |
| 42.36379019                                      | 227.7952623                                     | 0.050601064                                      |
| 500.2098728                                      | 2631.572743                                     | 0.04242949                                       |
| 66.80432309                                      | 235.5073948                                     | 0.082888914                                      |
| 149.4304606                                      | 622.8349293                                     | 0.063849704                                      |
| 90.87780356                                      | 430.4508894                                     | 0.06905462                                       |
| 53.35380835                                      | 282.0835381                                     | 0.057359382                                      |
| 49.21566402                                      | 368.3416572                                     | 0.060579938                                      |
| 132.4148183                                      | 722.1760264                                     | 0.057771824                                      |
| 351.1569916                                      | 1895.310697                                     | 0.061603521                                      |
| 212.2647249                                      | 1302.678317                                     | 0.052772473                                      |
| 178.9831564                                      | 1176.9026                                       | 0.035164273                                      |
| 16.92626728                                      | 77.94930876                                     | 0.046325423                                      |
| 119.1867354                                      | 504.3702511                                     | 0.057590777                                      |
| 33.21319797                                      | 116.5177665                                     | 0.08381346                                       |
| 208.3956835                                      | 1131.406631                                     | 0.055764243                                      |
| 29.4529148                                       | 151.3273543                                     | 0.062566625                                      |
| 139.4604674                                      | 648.3465937                                     | 0.067517747                                      |
| 178.6914474                                      | 1141.688816                                     | 0.055447344                                      |
| 71.2976085                                       | 426.3055802                                     | 0.054239774                                      |
| 309.0178019                                      | 2122.39048                                      | 0.048477482                                      |
| 398.2980941                                      | 2863.792436                                     | 0.045020413                                      |
| 653.9152505                                      | 3338.428976                                     | 0.051113475                                      |
| 90.33512545                                      | 315.1075269                                     | 0.072087762                                      |
| 69.8343778                                       | 396.4145031                                     | 0.06140411                                       |
| 38.29836066                                      | 200.7967213                                     | 0.066305262                                      |
| 100.3276644                                      | 635.6723356                                     | 0.064327572                                      |
| 168.7385805                                      | 989.2234715                                     | 0.06767719                                       |
| 31.86904762                                      | 152.0238095                                     | 0.094978807                                      |
| 117.4280388                                      | 331.3266219                                     | 0.098128518                                      |
| 243.2313754                                      | 788.7614613                                     | 0.082536244                                      |
| 11.4                                             | 57.0137931                                      | 0.04955144                                       |
| 211.4458862                                      | 1308.030964                                     | 0.056018925                                      |
| 355.9273192                                      | 2325.950329                                     | 0.043268734                                      |
| 45.15167095                                      | 286.840617                                      | 0.065648409                                      |
| 108.8608247                                      | 505.3608247                                     | 0.053258783                                      |
| 13.84153005                                      | 63.8852459                                      | 0.064782396                                      |
| 11.43809524                                      | 37.91428571                                     | 0.121995807                                      |
| 279.4724528                                      | 1411.895597                                     | 0.054885647                                      |
| 50.89518414                                      | 196.5694051                                     | 0.100868063                                      |
| 65.52446184                                      | 341.1135029                                     | 0.072646321                                      |
| 253.7144254                                      | 1518.862592                                     | 0.059480638                                      |
| 347.8629004                                      | 2336.313813                                     | 0.051855302                                      |
| 22.4229249                                       | 57.07114625                                     | 0.120298636                                      |
| 79.32730263                                      | 452.0822368                                     | 0.057493361                                      |
| 11.73170732                                      | 40.67479675                                     | 0.063325868                                      |
| 27.45382586                                      | 159.4063325                                     | 0.047517422                                      |
| 49.72366791                                      | 269.2428748                                     | 0.070545323                                      |

| log.sigma.0.5.mm.3D_gldm_DependenceNonUniformityNormalized | log.sigma.0.5.mm.3D_gldm_DependenceVariance | log.sigma.0.5.mm.3D_gldm_LargeDependenceEmphasis |
|------------------------------------------------------------|---------------------------------------------|--------------------------------------------------|
| 0.069613752                                                | 18.10973525                                 | 76.5694051                                       |
| 0.062028605                                                | 19.22788159                                 | 111.8117477                                      |
| 0.067138822                                                | 28.31914035                                 | 89.33179724                                      |
| 0.073667928                                                | 14.61474805                                 | 68.53548387                                      |
| 0.064594471                                                | 18.80205771                                 | 107.7075209                                      |
| 0.06092408                                                 | 20.42895738                                 | 104.3094868                                      |
| 0.076843153                                                | 13.32368868                                 | 85.1958457                                       |
| 0.06826666                                                 | 17.68393353                                 | 82.51696607                                      |
| 0.065463032                                                | 17.81335145                                 | 95.23472823                                      |
| 0.05905849                                                 | 21.72667262                                 | 104.8553906                                      |
| 0.066037557                                                | 17.92100057                                 | 107.2200726                                      |
| 0.064921205                                                | 20.25160587                                 | 87.48717949                                      |
| 0.066501824                                                | 18.02236721                                 | 114.2401157                                      |
| 0.057182677                                                | 23.30214637                                 | 140.1663685                                      |
| 0.072747888                                                | 14.45539515                                 | 83.81448957                                      |
| 0.06908125                                                 | 15.66324398                                 | 108.8759177                                      |
| 0.057520053                                                | 23.74284283                                 | 120.7851003                                      |
| 0.06144506                                                 | 19.86621441                                 | 127.787307                                       |
| 0.061212078                                                | 20.45781226                                 | 104.0137457                                      |
| 0.06130378                                                 | 19.69603935                                 | 134.9842913                                      |
| 0.055629176                                                | 24.01161605                                 | 117.631317                                       |
| 0.066162115                                                | 17.87906842                                 | 102.4976744                                      |
| 0.051290759                                                | 28.12403744                                 | 141.5609667                                      |
| 0.065667939                                                | 19.92194017                                 | 85.09147609                                      |
| 0.054759329                                                | 27.51155892                                 | 121.717608                                       |
| 0.059634247                                                | 22.85966996                                 | 100.8789625                                      |
| 0.062199808                                                | 19.03216973                                 | 116.6803231                                      |
| 0.055662826                                                | 27.92408725                                 | 113.1995813                                      |
| 0.065278431                                                | 18.7275956                                  | 88.67025496                                      |
| 0.058150375                                                | 22.08970615                                 | 119.9299764                                      |
| 0.053773876                                                | 27.59560801                                 | 119.7713117                                      |
| 0.062344042                                                | 19.25852893                                 | 131.3541315                                      |
| 0.068350089                                                | 16.12902069                                 | 81.18002951                                      |
| 0.09818787                                                 | 8.847263314                                 | 46.48076923                                      |
| 0.076063289                                                | 15.19444041                                 | 61.86144578                                      |
| 0.067762964                                                | 17.76023037                                 | 109.6732673                                      |
| 0.063537085                                                | 20.14684414                                 | 88.53055556                                      |
| 0.063515684                                                | 18.82153119                                 | 94.57483602                                      |
| 0.067121804                                                | 16.6525727                                  | 110.405988                                       |
| 0.064895434                                                | 19.11991901                                 | 87.44613918                                      |
| 0.062214523                                                | 20.95274583                                 | 99.33649932                                      |
| 0.058886226                                                | 21.25538285                                 | 108.9223505                                      |
| 0.068712437                                                | 16.84515334                                 | 95.19244823                                      |
| 0.065695181                                                | 17.77984152                                 | 91.87414634                                      |
| 0.070169589                                                | 15.34127802                                 | 87.29286475                                      |
| 0.05988174                                                 | 21.43075159                                 | 100.4874327                                      |
| 0.068924491                                                | 15.66310247                                 | 77.82372246                                      |
| 0.060840451                                                | 21.8200236                                  | 95.22641509                                      |
| 0.089440855                                                | 10.35041212                                 | 71.28358209                                      |
| 0.069620945                                                | 15.60596577                                 | 85.22937626                                      |
| 0.068215735                                                | 16.1367283                                  | 94.00292056                                      |
| 0.069125596                                                | 17.46228629                                 | 89.00483676                                      |
| 0.065138927                                                | 17.45087935                                 | 96.6613452                                       |
| 0.07168154                                                 | 15.42950232                                 | 92.22165821                                      |
| 0.076684022                                                | 13.01667278                                 | 85.05702897                                      |
| 0.076000368                                                | 15.90265337                                 | 65.79863481                                      |
| 0.068139745                                                | 17.82538687                                 | 81.35202918                                      |
| 0.070284458                                                | 15.04839133                                 | 78.51740139                                      |
| 0.065545219                                                | 18.33884298                                 | 91.36363636                                      |
| 0.05586341                                                 | 24.1913907                                  | 125.9012486                                      |
| 0.062489296                                                | 19.54231886                                 | 96.53279849                                      |
| 0.064103138                                                | 18.34034082                                 | 93.22380431                                      |
| 0.068694086                                                | 16.32428022                                 | 101.9915858                                      |
| 0.065537589                                                | 17.8596689                                  | 125.9937752                                      |
| 0.078001232                                                | 16.09921638                                 | 84.98156682                                      |
| 0.076746127                                                | 12.86556274                                 | 74.42691565                                      |
| 0.084297457                                                | 11.2595532                                  | 57.87309645                                      |
| 0.065184762                                                | 17.71500006                                 | 97.25774163                                      |
| 0.066037926                                                | 18.288745                                   | 86.59192825                                      |
| 0.069348815                                                | 16.80103983                                 | 78.50671308                                      |
| 0.058780081                                                | 22.20128116                                 | 107.2776316                                      |
| 0.063151115                                                | 20.62482064                                 | 109.9264836                                      |
| 0.059794466                                                | 20.4538334                                  | 114.9361455                                      |
| 0.059305851                                                | 20.84038978                                 | 119.9312091                                      |
| 0.071232598                                                | 14.62578965                                 | 91.18257081                                      |
| 0.080945453                                                | 11.63348364                                 | 62.91756272                                      |
| 0.062519586                                                | 19.88794964                                 | 100.308863                                       |
| 0.062784198                                                | 21.02042462                                 | 93.40983607                                      |
| 0.056875093                                                | 23.6320039                                  | 113.7097506                                      |
| 0.059289733                                                | 22.45247661                                 | 102.7582572                                      |
| 0.063232237                                                | 21.05152431                                 | 84.92460317                                      |
| 0.087567516                                                | 11.19497898                                 | 50.72259508                                      |
| 0.087117255                                                | 10.33429939                                 | 54.35315186                                      |
| 0.07862069                                                 | 13.41070155                                 | 81.33103448                                      |
| 0.062355024                                                | 19.28846189                                 | 105.7384252                                      |
| 0.064997684                                                | 18.46827981                                 | 127.4945215                                      |
| 0.058035567                                                | 22.52048956                                 | 106.5089974                                      |
| 0.070142284                                                | 16.38904075                                 | 84.64304124                                      |
| 0.075636776                                                | 14.18435904                                 | 70.31147541                                      |
| 0.10893424                                                 | 11.05705215                                 | 47.17142857                                      |
| 0.070307535                                                | 15.15079979                                 | 89.88301887                                      |
| 0.072089496                                                | 19.26053495                                 | 72.05949008                                      |
| 0.064113955                                                | 19.17109692                                 | 86.34050881                                      |
| 0.062032867                                                | 19.47232238                                 | 107.5383863                                      |
| 0.059914382                                                | 20.90300601                                 | 117.7657596                                      |
| 0.088628162                                                | 12.78092143                                 | 49.68774704                                      |
| 0.065236269                                                | 18.42977136                                 | 103.1726974                                      |
| 0.095379734                                                | 9.207350122                                 | 55.29268293                                      |
| 0.072437535                                                | 15.67899137                                 | 106.5567282                                      |
| 0.06161545                                                 | 21.1223357                                  | 93.27757125                                      |

| log.sigma.0.5.mm.3D_gldm_LargeDependenceLowGrayLevelEmphasis | log.sigma.0.5.mm.3D_gldm_SmallDependenceHighGrayLevelEmphasis | log.sigma.0.5.mm.3D_gldm_LargeDependenceHighGrayLevelEmphasis |
|--------------------------------------------------------------|---------------------------------------------------------------|---------------------------------------------------------------|
| 7.805870896                                                  | 1.219791744                                                   | 835.3215297                                                   |
| 10.86471353                                                  | 0.735892481                                                   | 1255.077516                                                   |
| 21.78336598                                                  | 1.271109007                                                   | 412.4884793                                                   |
| 2.456815877                                                  | 2.804983076                                                   | 2021.553321                                                   |
| 19.00634169                                                  | 0.437390932                                                   | 733.5793872                                                   |
| 9.65999136                                                   | 1.020209686                                                   | 1230.348367                                                   |
| 6.564000165                                                  | 0.653683219                                                   | 1205.115727                                                   |
| 4.510179132                                                  | 1.336928226                                                   | 1630.037924                                                   |
| 5.145002051                                                  | 1.348353279                                                   | 1882.743196                                                   |
| 6.05575856                                                   | 1.478824173                                                   | 1902.464816                                                   |
| 10.14165827                                                  | 0.832437257                                                   | 1233.422007                                                   |
| 3.269952803                                                  | 2.270259481                                                   | 2434.487179                                                   |
| 10.47012158                                                  | 0.751765462                                                   | 1359.191418                                                   |
| 27.92628826                                                  | 0.30678809                                                    | 828.1583184                                                   |
| 7.426818514                                                  | 0.929738471                                                   | 1043.090011                                                   |
| 10.45005019                                                  | 0.514219402                                                   | 1226.160213                                                   |
| 23.8930078                                                   | 0.358601638                                                   | 737.4942693                                                   |
| 12.18714992                                                  | 0.582805485                                                   | 1451.522727                                                   |
| 9.452751527                                                  | 0.675915118                                                   | 1267.78866                                                    |
| 12.97051242                                                  | 0.405270554                                                   | 1511.961442                                                   |
| 12.13628306                                                  | 0.926129877                                                   | 1208.299387                                                   |
| 5.593754796                                                  | 1.201699135                                                   | 1981.262791                                                   |
| 14.42076                                                     | 0.721179217                                                   | 1468.991578                                                   |
| 6.972785285                                                  | 1.01290208                                                    | 1169.04158                                                    |
| 28.40152293                                                  | 0.632803222                                                   | 581.1303987                                                   |
| 10.25227225                                                  | 1.175856468                                                   | 1075.920749                                                   |
| 6.529395629                                                  | 1.021331643                                                   | 2184.69071                                                    |
| 6.803309741                                                  | 1.610960587                                                   | 1941.534543                                                   |
| 7.9028305                                                    | 0.932900064                                                   | 1119.120113                                                   |
| 12.11600401                                                  | 0.809445713                                                   | 1271.086546                                                   |
| 12.59569052                                                  | 1.045832872                                                   | 1194.92073                                                    |
| 26.60209186                                                  | 0.322360689                                                   | 754.3192243                                                   |
| 4.294240214                                                  | 1.546908086                                                   | 1654.593212                                                   |
| 4.031558412                                                  | 1.818840966                                                   | 653.6346154                                                   |
| 5.768231258                                                  | 1.558956081                                                   | 767.7078313                                                   |
| 9.953536166                                                  | 0.67644303                                                    | 1330.436139                                                   |
| 9.099103871                                                  | 1.167702962                                                   | 939.8493056                                                   |
| 3.456337793                                                  | 1.844606122                                                   | 2683.055754                                                   |
| 18.88668496                                                  | 0.395584754                                                   | 774.3712575                                                   |
| 4.847272413                                                  | 1.775877266                                                   | 1673.960915                                                   |
| 9.552269524                                                  | 0.895736857                                                   | 1140.964722                                                   |
| 10.26817477                                                  | 0.865147573                                                   | 1274.494229                                                   |
| 4.984725554                                                  | 1.182412106                                                   | 1943.772838                                                   |
| 8.682526143                                                  | 0.932197136                                                   | 1098.757073                                                   |
| 4.518694861                                                  | 1.409700591                                                   | 1807.01065                                                    |
| 10.07113635                                                  | 1.014817307                                                   | 1071.146768                                                   |
| 1.943895036                                                  | 3.426981539                                                   | 3226.765823                                                   |
| 9.284762722                                                  | 0.927788932                                                   | 1064.349914                                                   |
| 5.592398425                                                  | 0.645155902                                                   | 1021.619403                                                   |
| 4.156847422                                                  | 1.589571324                                                   | 1872.321932                                                   |
| 5.133102103                                                  | 1.297452864                                                   | 1820.757593                                                   |
| 8.275116217                                                  | 1.014236877                                                   | 1071.44474                                                    |
| 3.473031655                                                  | 1.814016723                                                   | 2796.791154                                                   |
| 17.95872438                                                  | 0.516428917                                                   | 570.3519459                                                   |
| 8.188003836                                                  | 0.636244964                                                   | 967.2831519                                                   |
| 6.5736969                                                    | 1.337844224                                                   | 783.3174061                                                   |
| 4.548361178                                                  | 1.514874358                                                   | 1591.498404                                                   |
| 3.789530412                                                  | 1.623777898                                                   | 1765.960557                                                   |
| 8.756882595                                                  | 0.743575206                                                   | 1051.802211                                                   |
| 7.177222853                                                  | 1.42145848                                                    | 2298.84109                                                    |
| 5.438570634                                                  | 1.334140952                                                   | 1807.406324                                                   |
| 5.050389406                                                  | 1.55624177                                                    | 1833.047828                                                   |
| 5.611370354                                                  | 1.183573073                                                   | 1944.049515                                                   |
| 1.442241276                                                  | 3.109249307                                                   | 11132.80044                                                   |
| 19.07302867                                                  | 0.442873995                                                   | 479.3824885                                                   |
| 3.943834771                                                  | 1.479563048                                                   | 1515.047006                                                   |
| 5.563680203                                                  | 1.110994244                                                   | 727.7106599                                                   |
| 5.339786301                                                  | 1.310958069                                                   | 1877.697842                                                   |
| 8.244023418                                                  | 0.962663438                                                   | 1005.188341                                                   |
| 4.418698896                                                  | 1.693125438                                                   | 1485.23819                                                    |
| 10.71027814                                                  | 0.817907846                                                   | 1164.750329                                                   |
| 10.52713193                                                  | 0.871660515                                                   | 1256.701506                                                   |
| 11.41430031                                                  | 0.78829092                                                    | 1243.352167                                                   |
| 11.91830828                                                  | 0.65226431                                                    | 1291.704437                                                   |
| 4.723384233                                                  | 1.193247161                                                   | 1873.939869                                                   |
| 3.33716001                                                   | 1.436594144                                                   | 1309.767025                                                   |
| 9.521150652                                                  | 1.012023793                                                   | 1170.499552                                                   |
| 9.564862022                                                  | 1.000141577                                                   | 1005.581967                                                   |
| 6.489042079                                                  | 1.537798978                                                   | 2087.705782                                                   |
| 10.205605                                                    | 1.08143053                                                    | 1126.962052                                                   |
| 4.967623839                                                  | 2.703566731                                                   | 1555.103175                                                   |
| 2.793788179                                                  | 2.133444153                                                   | 1041.134974                                                   |
| 0.612253997                                                  | 8.040694437                                                   | 4936.315186                                                   |
| 6.34639272                                                   | 0.676902208                                                   | 1137.593103                                                   |
| 10.20163713                                                  | 0.82091989                                                    | 1190.929519                                                   |
| 4.526965074                                                  | 1.434072927                                                   | 3710.701059                                                   |
| 10.55296237                                                  | 0.924193542                                                   | 1159.070694                                                   |
| 4.512908832                                                  | 1.141548683                                                   | 1712.446521                                                   |
| 6.165983607                                                  | 0.761021346                                                   | 902.7213115                                                   |
| 2.244796296                                                  | 1.82254531                                                    | 1091.761905                                                   |
| 2.214772482                                                  | 2.298313445                                                   | 3758.073711                                                   |
| 2.739873749                                                  | 3.704313697                                                   | 1972.963173                                                   |
| 4.854138207                                                  | 1.651260831                                                   | 1626.241683                                                   |
| 5.880210167                                                  | 1.371557495                                                   | 2076.234719                                                   |
| 6.714139796                                                  | 1.256315715                                                   | 2152.52308                                                    |
| 2.994931984                                                  | 3.124717593                                                   | 934.6205534                                                   |
| 3.297527365                                                  | 1.683752614                                                   | 3349.564967                                                   |
| 5.103827913                                                  | 0.877411491                                                   | 699.2926829                                                   |
| 8.54408971                                                   | 0.641270978                                                   | 1443.519789                                                   |
| 9.029574268                                                  | 1.385452197                                                   | 1062.135068                                                   |

| log.sigma.0.5.mm.3D_gldm_SmallDependenceLowGrayLevelEmphasis | log.sigma.0.5.mm.3D_gldm_LowGrayLevelEmphasis | log.sigma.0.5.mm.3D_gldm_DistanceZoneVariabilityNormalized |
|--------------------------------------------------------------|-----------------------------------------------|------------------------------------------------------------|
| 0.015610729                                                  | 0.108212728                                   | 0.948753463                                                |
| 0.008154903                                                  | 0.098963783                                   | 0.942906574                                                |
| 0.037373382                                                  | 0.267930748                                   | 1                                                          |
| 0.003983405                                                  | 0.037088411                                   | 0.797846944                                                |
| 0.018850653                                                  | 0.211530486                                   | 0.889273356                                                |
| 0.010099675                                                  | 0.099110938                                   | 0.870200108                                                |
| 0.011756054                                                  | 0.10354517                                    | 0.555555556                                                |
| 0.005077194                                                  | 0.058037157                                   | 0.948753463                                                |
| 0.004702778                                                  | 0.057742155                                   | 0.977780583                                                |
| 0.004566734                                                  | 0.057426158                                   | 0.948753463                                                |
| 0.008550745                                                  | 0.09802331                                    | 0.953514739                                                |
| 0.004508005                                                  | 0.038540336                                   | 0.926035503                                                |
| 0.007010272                                                  | 0.093455874                                   | 0.896147808                                                |
| 0.016667037                                                  | 0.210426605                                   | 0.953514739                                                |
| 0.012098036                                                  | 0.099426759                                   | 0.831961591                                                |
| 0.003531918                                                  | 0.092706535                                   | 0.915657439                                                |
| 0.022192187                                                  | 0.23463865                                    | 0.8828125                                                  |
| 0.005069339                                                  | 0.092866757                                   | 0.972227733                                                |
| 0.006488369                                                  | 0.095299255                                   | 1                                                          |
| 0.004232291                                                  | 0.091252231                                   | 0.938523558                                                |
| 0.007928668                                                  | 0.099243499                                   | 0.91322314                                                 |
| 0.004065122                                                  | 0.053687138                                   | 0.862825789                                                |
| 0.005154649                                                  | 0.094433866                                   | 0.966676242                                                |
| 0.019633319                                                  | 0.105924578                                   | 0.698216735                                                |
| 0.020666428                                                  | 0.236495247                                   | 0.971434573                                                |
| 0.012872476                                                  | 0.110779299                                   | 1                                                          |
| 0.003068071                                                  | 0.054960242                                   | 0.850618018                                                |
| 0.004703628                                                  | 0.057173303                                   | 0.906111873                                                |
| 0.010610767                                                  | 0.100796821                                   | 0.906766628                                                |
| 0.007485641                                                  | 0.10039557                                    | 0.95791421                                                 |
| 0.008415732                                                  | 0.098934269                                   | 0.978725864                                                |
| 0.010964986                                                  | 0.197157345                                   | 0.874851279                                                |
| 0.006342604                                                  | 0.058201971                                   | 0.958781163                                                |
| 0.011580952                                                  | 0.11930948                                    | 1                                                          |
| 0.020982114                                                  | 0.119335676                                   | 0.871581451                                                |
| 0.007960205                                                  | 0.09842258                                    | 0.888038549                                                |
| 0.010891793                                                  | 0.105789442                                   | 0.98601468                                                 |
| 0.00271544                                                   | 0.036037713                                   | 0.915657439                                                |
| 0.016887574                                                  | 0.208541251                                   | 0.702479339                                                |
| 0.00678708                                                   | 0.057964391                                   | 0.94035503                                                 |
| 0.011953183                                                  | 0.104325155                                   | 0.87359954                                                 |
| 0.011326512                                                  | 0.10099452                                    | 0.891272189                                                |
| 0.004034399                                                  | 0.056434375                                   | 0.867346939                                                |
| 0.01290396                                                   | 0.106497959                                   | 0.792387543                                                |
| 0.006029747                                                  | 0.05806739                                    | 0.837662974                                                |
| 0.008426724                                                  | 0.095338179                                   | 0.970809328                                                |
| 0.002766585                                                  | 0.025766218                                   | 0.901033854                                                |
| 0.01810647                                                   | 0.105965314                                   | 0.948753463                                                |
| 0.018604855                                                  | 0.10622927                                    | 0.625                                                      |
| 0.006932119                                                  | 0.057193946                                   | 0.81450654                                                 |
| 0.003690401                                                  | 0.05486435                                    | 0.972419189                                                |
| 0.009138721                                                  | 0.104934166                                   | 0.942906574                                                |
| 0.00243753                                                   | 0.035860331                                   | 0.961305402                                                |
| 0.016847022                                                  | 0.214975559                                   | 0.91322314                                                 |
| 0.005030802                                                  | 0.094172436                                   | 0.987578125                                                |
| 0.019758779                                                  | 0.131108731                                   | 0.875555556                                                |
| 0.00539846                                                   | 0.058637848                                   | 0.717519239                                                |
| 0.006542774                                                  | 0.058308536                                   | 0.683396152                                                |
| 0.015110746                                                  | 0.109546116                                   | 0.78125                                                    |
| 0.004399668                                                  | 0.055804011                                   | 1                                                          |
| 0.004613995                                                  | 0.056836887                                   | 0.9608                                                     |
| 0.004872319                                                  | 0.05643304                                    | 0.939453125                                                |
| 0.003972531                                                  | 0.053473734                                   | 0.925485247                                                |
| 0.000829242                                                  | 0.011668284                                   | 1                                                          |
| 0.011214366                                                  | 0.249231951                                   | 1                                                          |
| 0.004548056                                                  | 0.054857654                                   | 0.869498307                                                |
| 0.024430972                                                  | 0.119020023                                   | 0.698216735                                                |
| 0.004000641                                                  | 0.055544229                                   | 0.955247363                                                |
| 0.012240582                                                  | 0.106367713                                   | 1                                                          |
| 0.005564127                                                  | 0.057565684                                   | 0.92737629                                                 |
| 0.007831823                                                  | 0.098307931                                   | 0.985075471                                                |
| 0.007904887                                                  | 0.099263606                                   | 0.961553249                                                |
| 0.006455896                                                  | 0.096816116                                   | 0.92866941                                                 |
| 0.006331579                                                  | 0.09571596                                    | 0.9561624                                                  |
| 0.004470898                                                  | 0.055841335                                   | 0.955945249                                                |
| 0.010382456                                                  | 0.064180398                                   | 0.865123967                                                |
| 0.009014428                                                  | 0.101575898                                   | 0.898596939                                                |
| 0.010498293                                                  | 0.106461293                                   | 0.825182102                                                |
| 0.005410408                                                  | 0.057564376                                   | 0.894139226                                                |
| 0.011411914                                                  | 0.105195234                                   | 0.8828125                                                  |
| 0.007597297                                                  | 0.062426529                                   | 0.957466919                                                |
| 0.013637068                                                  | 0.066283905                                   | 0.906766628                                                |
| 0.001354921                                                  | 0.011730819                                   | 0.852385307                                                |
| 0.008684757                                                  | 0.097886973                                   | 0.78125                                                    |
| 0.007810081                                                  | 0.09605045                                    | 0.950032873                                                |
| 0.001933822                                                  | 0.035038819                                   | 0.7738                                                     |
| 0.011471848                                                  | 0.099432662                                   | 0.96001666                                                 |
| 0.004886115                                                  | 0.057972761                                   | 0.837372449                                                |
| 0.012687584                                                  | 0.095892532                                   | 1                                                          |
| 0.038770768                                                  | 0.084875661                                   | 0.857988166                                                |
| 0.002434918                                                  | 0.025628026                                   | 0.881429258                                                |
| 0.006296827                                                  | 0.039709137                                   | 0.970156107                                                |
| 0.006820568                                                  | 0.058060577                                   | 0.842449465                                                |
| 0.004657859                                                  | 0.05592422                                    | 0.880670896                                                |
| 0.00386893                                                   | 0.054595445                                   | 0.946195066                                                |
| 0.012945457                                                  | 0.070610598                                   | 0.931122449                                                |
| 0.003685182                                                  | 0.036784503                                   | 1                                                          |
| 0.013202411                                                  | 0.099771906                                   | 0.78125                                                    |
| 0.01228265                                                   | 0.095360598                                   | 0.889273356                                                |
| 0.010778454                                                  | 0.10467312                                    | 0.961553249                                                |

| log.sigma.0.5.mm.3D_gldzm_LowIntensityEmphasis | log.sigma.0.5.mm.3D_gldzm_LargeDistanceEmphasis | log.sigma.0.5.mm.3D_gldzm_HighIntensitySmallDistanceEmphasis |
|------------------------------------------------|-------------------------------------------------|--------------------------------------------------------------|
| 0.239177408                                    | 1.078947368                                     | 18.26973684                                                  |
| 0.21877451                                     | 1.088235294                                     | 17.53308824                                                  |
| 0.367745478                                    | 1                                               | 13.58139535                                                  |
| 0.057287645                                    | 1.342281879                                     | 36.56711409                                                  |
| 0.404624183                                    | 1.176470588                                     | 10.60294118                                                  |
| 0.166576227                                    | 1.209302326                                     | 15.20930233                                                  |
| 0.294240741                                    | 2                                               | 11.33333333                                                  |
| 0.10354741                                     | 1.078947368                                     | 26.6157895                                                   |
| 0.086520102                                    | 1.033707865                                     | 26.61797753                                                  |
| 0.085982702                                    | 1.078947368                                     | 25.66118421                                                  |
| 0.162943122                                    | 1.071428571                                     | 15.69047619                                                  |
| 0.07782688                                     | 1.115384615                                     | 33.02564103                                                  |
| 0.161317062                                    | 1.164835165                                     | 16.06318681                                                  |
| 0.523478836                                    | 1.071428571                                     | 7.547619048                                                  |
| 0.206239712                                    | 1.277777778                                     | 14.25925926                                                  |
| 0.134917926                                    | 1.132352941                                     | 18.06985294                                                  |
| 0.567925347                                    | 1.1875                                          | 7.390625                                                     |
| 0.159847418                                    | 1.042253521                                     | 15.61971831                                                  |
| 0.161615226                                    | 1                                               | 14.62962963                                                  |
| 0.170992063                                    | 1.095238095                                     | 13.42857143                                                  |
| 0.15273408                                     | 1.136363636                                     | 16.39867424                                                  |
| 0.082933936                                    | 1.222222222                                     | 23.12962963                                                  |
| 0.123206215                                    | 1.050847458                                     | 15.84745763                                                  |
| 0.318878601                                    | 1.555555556                                     | 12.2037037                                                   |
| 0.400193237                                    | 1.043478261                                     | 10.60869565                                                  |
| 0.210852273                                    | 1                                               | 18.18181818                                                  |
| 0.084941513                                    | 1.243902439                                     | 23.17073171                                                  |
| 0.07589144                                     | 1.148148148                                     | 25.01851852                                                  |
| 0.189362745                                    | 1.147058824                                     | 14.16911765                                                  |
| 0.178984285                                    | 1.064516129                                     | 17.5188172                                                   |
| 0.134309152                                    | 1.032258065                                     | 16.5672043                                                   |
| 0.377511856                                    | 1.201219512                                     | 9.714939024                                                  |
| 0.120830098                                    | 1.063157895                                     | 23.49736842                                                  |
| 0.163179705                                    | 1                                               | 21.5                                                         |
| 0.233917625                                    | 1.206896552                                     | 15.42241379                                                  |
| 0.181848545                                    | 1.178571429                                     | 14.25595238                                                  |
| 0.193646203                                    | 1.021126761                                     | 19.30457746                                                  |
| 0.055138951                                    | 1.132352941                                     | 31.59742647                                                  |
| 0.393518519                                    | 1.545454545                                     | 8.537878788                                                  |
| 0.095838697                                    | 1.092307692                                     | 24.98846154                                                  |
| 0.273964218                                    | 1.203389831                                     | 14.65677966                                                  |
| 0.202879274                                    | 1.173076923                                     | 14.15865385                                                  |
| 0.089362144                                    | 1.214285714                                     | 24.02678571                                                  |
| 0.24664199                                     | 1.352941176                                     | 16.11764706                                                  |
| 0.105201135                                    | 1.267326733                                     | 21.55445545                                                  |
| 0.140007139                                    | 1.044444444                                     | 16.00740741                                                  |
| 0.041502919                                    | 1.156626506                                     | 43.93072289                                                  |
| 0.275921053                                    | 1.078947368                                     | 13.39473684                                                  |
| 0.317951389                                    | 1.75                                            | 13.0625                                                      |
| 0.104783603                                    | 1.310344828                                     | 23.52586207                                                  |
| 0.07234675                                     | 1.041958042                                     | 26.27622378                                                  |
| 0.140776144                                    | 1.088235294                                     | 20.68382353                                                  |
| 0.049766391                                    | 1.059210526                                     | 35.73190789                                                  |
| 0.411073232                                    | 1.136363636                                     | 10.875                                                       |
| 0.142950468                                    | 1.01875                                         | 16.9140625                                                   |
| 0.275997543                                    | 1.2                                             | 17.75833333                                                  |
| 0.104168823                                    | 1.510638298                                     | 22.53723404                                                  |
| 0.100360576                                    | 1.591549296                                     | 23.75                                                        |
| 0.316767149                                    | 1.375                                           | 13.74375                                                     |
| 0.087807329                                    | 1                                               | 23.57446809                                                  |
| 0.086483787                                    | 1.06                                            | 24.755                                                       |
| 0.086908122                                    | 1.09375                                         | 26.65722656                                                  |
| 0.085927684                                    | 1.11627907                                      | 21.90310078                                                  |
| 0.027718377                                    | 1                                               | 89.09722222                                                  |
| 0.215277778                                    | 1                                               | 10.875                                                       |
| 0.091722908                                    | 1.210526316                                     | 28.09210526                                                  |
| 0.330915638                                    | 1.555555556                                     | 13.23148148                                                  |
| 0.083379734                                    | 1.06870229                                      | 24.08015267                                                  |
| 0.205277778                                    | 1                                               | 17.60869565                                                  |
| 0.094251475                                    | 1.113207547                                     | 25.57311321                                                  |
| 0.173310359                                    | 1.022556391                                     | 14.77443609                                                  |
| 0.156830065                                    | 1.058823529                                     | 17.33823529                                                  |
| 0.163523618                                    | 1.111111111                                     | 17.12433862                                                  |
| 0.170519667                                    | 1.067264574                                     | 14.97309417                                                  |
| 0.105291431                                    | 1.067605634                                     | 23.60704225                                                  |
| 0.187775307                                    | 1.218181818                                     | 19.95454545                                                  |
| 0.14999504                                     | 1.160714286                                     | 18.66964286                                                  |
| 0.174202509                                    | 1.290322581                                     | 15.33870968                                                  |
| 0.088732649                                    | 1.168224299                                     | 23.37149533                                                  |
| 0.194142149                                    | 1.1875                                          | 15.815625                                                    |
| 0.085131002                                    | 1.065217391                                     | 29.2173913                                                   |
| 0.172434849                                    | 1.147058824                                     | 21.49264706                                                  |
| 0.018814311                                    | 1.240740741                                     | 94.84567901                                                  |
| 0.224201389                                    | 1.375                                           | 13.53125                                                     |
| 0.15242783                                     | 1.076923077                                     | 15.375                                                       |
| 0.047504114                                    | 1.39                                            | 29.83875                                                     |
| 0.195391156                                    | 1.06122449                                      | 13.65816327                                                  |
| 0.098417355                                    | 1.267857143                                     | 26.35714286                                                  |
| 0.192152778                                    | 1                                               | 13                                                           |
| 0.313440171                                    | 1.230769231                                     | 15.84615385                                                  |
| 0.052102853                                    | 1.189873418                                     | 40.37816456                                                  |
| 0.066623453                                    | 1.045454545                                     | 36.70075758                                                  |
| 0.107672438                                    | 1.25862069                                      | 21.7887931                                                   |
| 0.086651279                                    | 1.191176471                                     | 23.36519608                                                  |
| 0.082346586                                    | 1.083003953                                     | 24.70158103                                                  |
| 0.114993218                                    | 1.107142857                                     | 26.4375                                                      |
| 0.071724634                                    | 1                                               | 30.51666667                                                  |
| 0.206840278                                    | 1.375                                           | 14.15625                                                     |
| 0.275245098                                    | 1.176470588                                     | 13.30882353                                                  |
| 0.159574496                                    | 1.058823529                                     | 21.76470588                                                  |

| log.sigma.0.5.mm.3D_gldzm_LowIntensityLargeDistanceEmphasis | log.sigma.0.5.mm.3D_gldzm_HighIntensityEmphasis | log.sigma.0.5.mm.3D_gldzm_DistanceZoneVariability | log.sigma.0.5.mm.3D_gldzm_ZonePercentage |
|-------------------------------------------------------------|-------------------------------------------------|---------------------------------------------------|------------------------------------------|
| 0.318124776                                                 | 18.28947368                                     | 36.05263158                                       | 0.053824363                              |
| 0.273921569                                                 | 17.58823529                                     | 64.11764706                                       | 0.032739528                              |
| 0.367745478                                                 | 13.58139535                                     | 43                                                | 0.099078341                              |
| 0.082603019                                                 | 39.69798658                                     | 118.8791946                                       | 0.05654649                               |
| 0.581094771                                                 | 10.64705882                                     | 15.11764706                                       | 0.04735376                               |
| 0.218901809                                                 | 15.41860465                                     | 37.41860465                                       | 0.066874028                              |
| 0.952240741                                                 | 12.93333333                                     | 8.33333333                                        | 0.044510386                              |
| 0.123284252                                                 | 26.71052632                                     | 36.05263158                                       | 0.037924152                              |
| 0.087456432                                                 | 26.92134831                                     | 87.02247191                                       | 0.042809043                              |
| 0.089674969                                                 | 26.30263158                                     | 144.2105263                                       | 0.049063912                              |
| 0.180800265                                                 | 15.76190476                                     | 40.04761905                                       | 0.050785973                              |
| 0.085038419                                                 | 33.48717949                                     | 72.23076923                                       | 0.052631579                              |
| 0.245053325                                                 | 16.35164835                                     | 81.54945055                                       | 0.043876567                              |
| 0.527943122                                                 | 7.833333333                                     | 40.04761905                                       | 0.037567084                              |
| 0.376671811                                                 | 15.14814815                                     | 44.92592593                                       | 0.059275521                              |
| 0.148937533                                                 | 18.78676471                                     | 124.5294118                                       | 0.019576796                              |
| 0.755425347                                                 | 7.4375                                          | 28.25                                             | 0.045845272                              |
| 0.170410798                                                 | 15.66197183                                     | 69.02816901                                       | 0.030445969                              |
| 0.161615226                                                 | 14.62962963                                     | 27                                                | 0.046391753                              |
| 0.194801587                                                 | 13.52380952                                     | 59.12698413                                       | 0.022491967                              |
| 0.172367918                                                 | 16.92424242                                     | 241.0909091                                       | 0.050535988                              |
| 0.104265926                                                 | 24                                              | 69.88888889                                       | 0.047093023                              |
| 0.135918079                                                 | 15.89830508                                     | 114.0677966                                       | 0.043207616                              |
| 0.599742798                                                 | 13.48148148                                     | 18.85185185                                       | 0.056133056                              |
| 0.402910628                                                 | 10.7826087                                      | 67.02898551                                       | 0.05730897                               |
| 0.210852273                                                 | 18.18181818                                     | 44                                                | 0.063400576                              |
| 0.10355221                                                  | 24.53658537                                     | 104.6260163                                       | 0.035487594                              |
| 0.085729403                                                 | 26.11111111                                     | 73.39506173                                       | 0.056524773                              |
| 0.235114379                                                 | 14.76470588                                     | 92.49019608                                       | 0.057790368                              |
| 0.212138407                                                 | 17.8172043                                      | 89.08602151                                       | 0.036585366                              |
| 0.135283477                                                 | 16.8655914                                      | 182.0430108                                       | 0.058508965                              |
| 0.509310637                                                 | 10.12195122                                     | 143.4756098                                       | 0.027655987                              |
| 0.129369303                                                 | 23.91578947                                     | 91.08421053                                       | 0.046728972                              |
| 0.163179705                                                 | 21.5                                            | 10                                                | 0.096153846                              |
| 0.340239464                                                 | 16.37931034                                     | 25.27586207                                       | 0.087349398                              |
| 0.237840608                                                 | 14.88095238                                     | 74.5952381                                        | 0.041584158                              |
| 0.214772963                                                 | 19.30985915                                     | 140.0140845                                       | 0.049305556                              |
| 0.058346484                                                 | 33.36764706                                     | 124.5294118                                       | 0.040548599                              |
| 0.683291246                                                 | 9.696969697                                     | 23.18181818                                       | 0.039520958                              |
| 0.112505364                                                 | 25.13846154                                     | 61.12307692                                       | 0.061963775                              |
| 0.330291902                                                 | 15.76271186                                     | 51.54237288                                       | 0.040027137                              |
| 0.289417735                                                 | 14.28846154                                     | 46.34615385                                       | 0.054564533                              |
| 0.116147858                                                 | 24.80357143                                     | 48.57142857                                       | 0.03410475                               |
| 0.453724823                                                 | 17                                              | 40.41176471                                       | 0.049756098                              |
| 0.131192286                                                 | 23.84158416                                     | 84.6039604                                        | 0.053780618                              |
| 0.15111825                                                  | 16.05185185                                     | 131.0592593                                       | 0.06059246                               |
| 0.046864458                                                 | 45.81927711                                     | 224.3574297                                       | 0.058368495                              |
| 0.295657895                                                 | 13.47368421                                     | 36.05263158                                       | 0.065180103                              |
| 1.067951389                                                 | 13.25                                           | 5                                                 | 0.059701493                              |
| 0.145013488                                                 | 24.79310345                                     | 23.62068966                                       | 0.058350101                              |
| 0.077008755                                                 | 26.37062937                                     | 139.0559441                                       | 0.041764019                              |
| 0.229011438                                                 | 20.70588235                                     | 32.05882353                                       | 0.041112455                              |
| 0.053501314                                                 | 36.17105263                                     | 146.1184211                                       | 0.039780162                              |
| 0.547436869                                                 | 10.90909091                                     | 20.09090909                                       | 0.037225042                              |
| 0.161700468                                                 | 16.91875                                        | 158.0125                                          | 0.024528591                              |
| 0.378775321                                                 | 18.68333333                                     | 52.53333333                                       | 0.068259386                              |
| 0.19092387                                                  | 24.91489362                                     | 67.44680851                                       | 0.042863657                              |
| 0.244966306                                                 | 27.05633803                                     | 48.52112676                                       | 0.05491106                               |
| 0.579267149                                                 | 13.95                                           | 31.25                                             | 0.049140049                              |
| 0.087807329                                                 | 23.57446809                                     | 47                                                | 0.053348468                              |
| 0.093150454                                                 | 24.89                                           | 96.08                                             | 0.047192072                              |
| 0.090000985                                                 | 27.65625                                        | 240.5                                             | 0.046732384                              |
| 0.093033627                                                 | 22.63565891                                     | 119.3875969                                       | 0.041747573                              |
| 0.027718377                                                 | 89.09722222                                     | 72                                                | 0.026363969                              |
| 0.215277778                                                 | 10.875                                          | 8                                                 | 0.036866359                              |
| 0.1205748                                                   | 29.31578947                                     | 49.56140351                                       | 0.036703155                              |
| 0.886471193                                                 | 13.37037037                                     | 18.85185185                                       | 0.068527919                              |
| 0.089104925                                                 | 24.38931298                                     | 125.1374046                                       | 0.040975915                              |
| 0.205277778                                                 | 17.60869565                                     | 23                                                | 0.051569507                              |
| 0.108193844                                                 | 26.0754717                                      | 98.30188679                                       | 0.052710094                              |
| 0.178949457                                                 | 14.7969248                                      | 131.0150376                                       | 0.04375                                  |
| 0.159183007                                                 | 17.70588235                                     | 49.03921569                                       | 0.045172719                              |
| 0.196345487                                                 | 17.43386243                                     | 175.5185185                                       | 0.036571207                              |
| 0.187335811                                                 | 15.04035874                                     | 213.2242152                                       | 0.033204288                              |
| 0.110595278                                                 | 24.25352113                                     | 339.3605634                                       | 0.038671024                              |
| 0.324138943                                                 | 20.09090909                                     | 47.58181818                                       | 0.049283154                              |
| 0.258625992                                                 | 19.17857143                                     | 50.32142857                                       | 0.050134288                              |
| 0.299041219                                                 | 16.06451613                                     | 25.58064516                                       | 0.050819672                              |
| 0.107789804                                                 | 24.42990654                                     | 95.6728972                                        | 0.060657596                              |
| 0.267225482                                                 | 16.40625                                        | 141.25                                            | 0.056219255                              |
| 0.10143535                                                  | 29.2826087                                      | 44.04347826                                       | 0.091269841                              |
| 0.224722431                                                 | 21.85294118                                     | 92.49019608                                       | 0.07066264                               |
| 0.02246894                                                  | 100.1975309                                     | 138.0864198                                       | 0.058022923                              |
| 0.599201389                                                 | 13.625                                          | 6.25                                              | 0.055172414                              |
| 0.159308172                                                 | 15.80769231                                     | 148.2051282                                       | 0.046004129                              |
| 0.059443962                                                 | 34.635                                          | 154.76                                            | 0.036523009                              |
| 0.256615646                                                 | 13.67346939                                     | 47.04081633                                       | 0.062982005                              |
| 0.165381641                                                 | 26.625                                          | 46.89285714                                       | 0.036082474                              |
| 0.192152778                                                 | 13                                              | 12                                                | 0.06557377                               |
| 0.371132479                                                 | 16.07692308                                     | 11.15384615                                       | 0.123809524                              |
| 0.059039239                                                 | 42.19620253                                     | 139.2658228                                       | 0.039748428                              |
| 0.071673958                                                 | 36.8030303                                      | 64.03030303                                       | 0.093484419                              |
| 0.134590102                                                 | 23.17241379                                     | 48.86206897                                       | 0.056751468                              |
| 0.104816878                                                 | 24.26960784                                     | 179.6568627                                       | 0.049877751                              |
| 0.090581106                                                 | 24.96837945                                     | 239.3873518                                       | 0.043575611                              |
| 0.117179806                                                 | 27.75                                           | 26.07142857                                       | 0.110671937                              |
| 0.071724634                                                 | 30.51666667                                     | 60                                                | 0.049342105                              |
| 0.581840278                                                 | 14.25                                           | 6.25                                              | 0.06504065                               |
| 0.282303922                                                 | 14.41176471                                     | 15.11764706                                       | 0.044854881                              |
| 0.174280379                                                 | 21.82352941                                     | 49.03921569                                       | 0.063197026                              |



| log.sigma.0.5.mm.3D_gldzm_IntensityVariabilityNormalized | log.sigma.0.5.mm.3D_gldzm_LowIntensitySmallDistanceEmphasis | log.sigma.0.5.mm.3D_gldzm_IntensityVariability |
|----------------------------------------------------------|-------------------------------------------------------------|------------------------------------------------|
| 0.191135734                                              | 0.219440566                                                 | 7.263157895                                    |
| 0.23399654                                               | 0.204987745                                                 | 15.91176471                                    |
| 0.269875608                                              | 0.367745478                                                 | 11.60465116                                    |
| 0.178325301                                              | 0.050958802                                                 | 26.5704698                                     |
| 0.314878893                                              | 0.360506536                                                 | 5.352941176                                    |
| 0.342347215                                              | 0.153494832                                                 | 14.72093023                                    |
| 0.28                                                     | 0.129740741                                                 | 4.2                                            |
| 0.209141274                                              | 0.0986132                                                   | 7.947368421                                    |
| 0.275849009                                              | 0.08628602                                                  | 24.5505618                                     |
| 0.261599723                                              | 0.085059636                                                 | 39.76315789                                    |
| 0.430839002                                              | 0.158478836                                                 | 18.0952381                                     |
| 0.175542406                                              | 0.076023996                                                 | 13.69230769                                    |
| 0.398864871                                              | 0.140382996                                                 | 36.2967033                                     |
| 0.416099773                                              | 0.522362765                                                 | 17.47619048                                    |
| 0.307270233                                              | 0.163631687                                                 | 16.59259259                                    |
| 0.304606401                                              | 0.131413024                                                 | 41.42647059                                    |
| 0.44921875                                               | 0.521050347                                                 | 14.375                                         |
| 0.35766713                                               | 0.157206573                                                 | 25.3943662                                     |
| 0.319615912                                              | 0.161615226                                                 | 8.62962963                                     |
| 0.36558327                                               | 0.165039683                                                 | 23.03174603                                    |
| 0.333161157                                              | 0.14782562                                                  | 87.95454545                                    |
| 0.342173449                                              | 0.077600939                                                 | 27.71604938                                    |
| 0.325050273                                              | 0.120028249                                                 | 38.3559322                                     |
| 0.207133059                                              | 0.248662551                                                 | 5.592592593                                    |
| 0.304767906                                              | 0.399513889                                                 | 21.02898551                                    |
| 0.297520661                                              | 0.210852273                                                 | 13.09090909                                    |
| 0.337960209                                              | 0.080288839                                                 | 41.56910569                                    |
| 0.273281512                                              | 0.073431949                                                 | 22.13580247                                    |
| 0.250096117                                              | 0.177924837                                                 | 25.50980392                                    |
| 0.25586773                                               | 0.170695755                                                 | 23.79569892                                    |
| 0.315932478                                              | 0.134065571                                                 | 58.76344086                                    |
| 0.346966092                                              | 0.344562161                                                 | 56.90243902                                    |
| 0.177617729                                              | 0.118695296                                                 | 16.87368421                                    |
| 0.22                                                     | 0.163179705                                                 | 2.2                                            |
| 0.227110583                                              | 0.207337165                                                 | 6.586206897                                    |
| 0.37585034                                               | 0.167850529                                                 | 31.57142857                                    |
| 0.210870859                                              | 0.188364512                                                 | 29.94366197                                    |
| 0.269896194                                              | 0.054337068                                                 | 36.70588235                                    |
| 0.417814509                                              | 0.321075337                                                 | 13.78787879                                    |
| 0.223195266                                              | 0.09167203                                                  | 14.50769231                                    |
| 0.239299052                                              | 0.259882298                                                 | 14.11864407                                    |
| 0.279585799                                              | 0.181244658                                                 | 14.53846154                                    |
| 0.286989796                                              | 0.082665715                                                 | 16.07142857                                    |
| 0.212610534                                              | 0.194871282                                                 | 10.84313725                                    |
| 0.252230174                                              | 0.098703347                                                 | 25.47524752                                    |
| 0.331687243                                              | 0.137229361                                                 | 44.77777778                                    |
| 0.197496815                                              | 0.040162534                                                 | 49.17670683                                    |
| 0.257617729                                              | 0.270986842                                                 | 9.789473684                                    |
| 0.25                                                     | 0.130451389                                                 | 2                                              |
| 0.248513674                                              | 0.094726132                                                 | 7.206896552                                    |
| 0.291896914                                              | 0.071181249                                                 | 41.74125874                                    |
| 0.519031142                                              | 0.11871732                                                  | 17.64705882                                    |
| 0.263331025                                              | 0.04883266                                                  | 40.02631579                                    |
| 0.32231405                                               | 0.376982323                                                 | 7.090909091                                    |
| 0.28625                                                  | 0.138262968                                                 | 45.8                                           |
| 0.213333333                                              | 0.250303099                                                 | 12.8                                           |
| 0.177229516                                              | 0.082480061                                                 | 16.65957447                                    |
| 0.275143821                                              | 0.064209144                                                 | 19.53521127                                    |
| 0.255                                                    | 0.251142149                                                 | 10.2                                           |
| 0.383431417                                              | 0.087807329                                                 | 18.0212766                                     |
| 0.2868                                                   | 0.08481712                                                  | 28.68                                          |
| 0.216186523                                              | 0.086134907                                                 | 55.34375                                       |
| 0.320593714                                              | 0.084151198                                                 | 41.35658915                                    |
| 0.305555556                                              | 0.027718377                                                 | 22                                             |
| 0.34375                                                  | 0.215277778                                                 | 2.75                                           |
| 0.19975377                                               | 0.084509936                                                 | 11.38596491                                    |
| 0.251028807                                              | 0.192026749                                                 | 6.777777778                                    |
| 0.260649146                                              | 0.081948436                                                 | 34.14503817                                    |
| 0.372400756                                              | 0.205277778                                                 | 8.565217391                                    |
| 0.193663225                                              | 0.090765883                                                 | 20.52830189                                    |
| 0.314263101                                              | 0.171900585                                                 | 41.79699248                                    |
| 0.347943099                                              | 0.15624183                                                  | 17.74509804                                    |
| 0.286694102                                              | 0.15531815                                                  | 54.18518519                                    |
| 0.309859438                                              | 0.166315631                                                 | 69.09865471                                    |
| 0.223312835                                              | 0.103965469                                                 | 79.27605634                                    |
| 0.208595041                                              | 0.153684398                                                 | 11.47272727                                    |
| 0.357142857                                              | 0.122837302                                                 | 20                                             |
| 0.321540062                                              | 0.142992832                                                 | 9.967741935                                    |
| 0.320814045                                              | 0.08396836                                                  | 34.3271028                                     |
| 0.241015625                                              | 0.175871315                                                 | 38.5625                                        |
| 0.253308129                                              | 0.081054915                                                 | 11.65217391                                    |
| 0.178969627                                              | 0.159362954                                                 | 18.25490196                                    |
| 0.14700503                                               | 0.017900653                                                 | 23.81481481                                    |
| 0.25                                                     | 0.130451389                                                 | 2                                              |
| 0.347715319                                              | 0.150707745                                                 | 54.24358974                                    |
| 0.32645                                                  | 0.044519152                                                 | 65.29                                          |
| 0.346105789                                              | 0.180085034                                                 | 16.95918367                                    |
| 0.442602041                                              | 0.081676284                                                 | 24.78571429                                    |
| 0.25                                                     | 0.192152778                                                 | 3                                              |
| 0.218934911                                              | 0.299017094                                                 | 2.846153846                                    |
| 0.21126422                                               | 0.050368756                                                 | 33.37974684                                    |
| 0.173553719                                              | 0.065360827                                                 | 11.45454545                                    |
| 0.223543401                                              | 0.100943022                                                 | 12.96551724                                    |
| 0.285082661                                              | 0.082109879                                                 | 58.15686275                                    |
| 0.308066053                                              | 0.080287957                                                 | 77.94071146                                    |
| 0.160714286                                              | 0.11444657                                                  | 4.5                                            |
| 0.262777778                                              | 0.071724634                                                 | 15.76666667                                    |
| 0.25                                                     | 0.113090278                                                 | 2                                              |
| 0.224913495                                              | 0.273480392                                                 | 3.823529412                                    |
| 0.210303729                                              | 0.155898026                                                 | 10.7254902                                     |

| log.sigma.0.5.mm.3D_gldzm_HighIntensityLargeDistanceEmphasis | log.sigma.0.5.mm.3D_gldzm_SmallDistanceEmphasis | log.sigma.0.5.mm.3D_glcm_SumVariance | log.sigma.0.5.mm.3D_glcm_Homogeneity1 |
|--------------------------------------------------------------|-------------------------------------------------|--------------------------------------|---------------------------------------|
| 18.36842105                                                  | 0.980263158                                     | 21.4888215                           | 0.627440109                           |
| 17.80882353                                                  | 0.977941176                                     | 23.34962789                          | 0.696375466                           |
| 13.58139535                                                  | 1                                               | 7.978671602                          | 0.646607915                           |
| 52.22147651                                                  | 0.91442953                                      | 72.90938685                          | 0.603817828                           |
| 10.82352941                                                  | 0.955882353                                     | 9.758619002                          | 0.706135585                           |
| 16.25581395                                                  | 0.947674419                                     | 23.5678712                           | 0.683656648                           |
| 19.33333333                                                  | 0.75                                            | 24.08589884                          | 0.675029882                           |
| 27.02631579                                                  | 0.980263158                                     | 42.90673459                          | 0.631388731                           |
| 28.13483146                                                  | 0.991573034                                     | 43.63275486                          | 0.665943318                           |
| 28.86842105                                                  | 0.980263158                                     | 44.95957247                          | 0.678832418                           |
| 16.04761905                                                  | 0.982142857                                     | 23.97691898                          | 0.698358266                           |
| 35.33333333                                                  | 0.971153846                                     | 73.01772945                          | 0.638476136                           |
| 17.50549451                                                  | 0.958791209                                     | 25.23343839                          | 0.704555055                           |
| 8.976190476                                                  | 0.982142857                                     | 9.753856343                          | 0.734288254                           |
| 18.7037037                                                   | 0.930555556                                     | 24.27995944                          | 0.658628806                           |
| 21.65441176                                                  | 0.966911765                                     | 25.83656612                          | 0.725226414                           |
| 7.625                                                        | 0.953125                                        | 8.729182304                          | 0.700641876                           |
| 15.83098592                                                  | 0.98943662                                      | 24.5692275                           | 0.722011                              |
| 14.62962963                                                  | 1                                               | 23.48220641                          | 0.68111222                            |
| 13.9047619                                                   | 0.976190476                                     | 26.18851823                          | 0.750314586                           |
| 19.02651515                                                  | 0.965909091                                     | 23.62138733                          | 0.698561392                           |
| 27.48148148                                                  | 0.944444444                                     | 47.55703035                          | 0.683162365                           |
| 16.10169492                                                  | 0.987288136                                     | 24.97085907                          | 0.746121391                           |
| 18.59259259                                                  | 0.861111111                                     | 23.5362626                           | 0.642054647                           |
| 11.47826087                                                  | 0.989130435                                     | 8.726788622                          | 0.716267101                           |
| 18.18181818                                                  | 1                                               | 21.6495468                           | 0.672502216                           |
| 30                                                           | 0.93902439                                      | 48.20025474                          | 0.700514712                           |
| 30.48148148                                                  | 0.962962963                                     | 44.94973164                          | 0.70060067                            |
| 17.14705882                                                  | 0.963235294                                     | 23.5294298                           | 0.668632495                           |
| 19.01075269                                                  | 0.983870968                                     | 23.08269109                          | 0.704790772                           |
| 18.05913978                                                  | 0.991935484                                     | 23.27359917                          | 0.70763066                            |
| 11.75                                                        | 0.949695122                                     | 10.2232002                           | 0.751220496                           |
| 25.58947368                                                  | 0.984210526                                     | 44.08180231                          | 0.633604817                           |
| 21.5                                                         | 1                                               | 21.42799004                          | 0.602676401                           |
| 20.20689655                                                  | 0.948275862                                     | 21.17644893                          | 0.607111549                           |
| 17.38095238                                                  | 0.955357143                                     | 23.5572733                           | 0.692095907                           |
| 19.33098592                                                  | 0.99471831                                      | 21.62625525                          | 0.654185011                           |
| 40.44852941                                                  | 0.966911765                                     | 76.56512832                          | 0.662827514                           |
| 14.33333333                                                  | 0.863636364                                     | 10.19999865                          | 0.698757496                           |
| 25.73846154                                                  | 0.976923077                                     | 43.58335787                          | 0.64974276                            |
| 20.18644068                                                  | 0.949152542                                     | 22.81305478                          | 0.664233886                           |
| 14.80769231                                                  | 0.956730769                                     | 22.5950353                           | 0.686048411                           |
| 27.91071429                                                  | 0.946428571                                     | 44.75593876                          | 0.665811045                           |
| 20.52941176                                                  | 0.911764706                                     | 21.9585549                           | 0.655891259                           |
| 32.99009901                                                  | 0.933168317                                     | 44.50414441                          | 0.652711654                           |
| 16.22962963                                                  | 0.988888889                                     | 24.27192506                          | 0.698522163                           |
| 53.37349398                                                  | 0.960843373                                     | 112.1916868                          | 0.624760229                           |
| 13.78947368                                                  | 0.980263158                                     | 22.35946185                          | 0.663405358                           |
| 14                                                           | 0.8125                                          | 22.64476298                          | 0.667339899                           |
| 29.86206897                                                  | 0.922413793                                     | 45.25333164                          | 0.65167379                            |
| 26.74825175                                                  | 0.98951049                                      | 46.29706074                          | 0.676551972                           |
| 20.79411765                                                  | 0.977941176                                     | 21.51674158                          | 0.658127993                           |
| 37.92763158                                                  | 0.985197368                                     | 75.84972538                          | 0.671278587                           |
| 11.04545455                                                  | 0.965909091                                     | 9.431838766                          | 0.679728006                           |
| 16.9375                                                      | 0.9953125                                       | 24.18932955                          | 0.697096529                           |
| 22.38333333                                                  | 0.95                                            | 20.07477358                          | 0.595650714                           |
| 34.42553191                                                  | 0.872340426                                     | 42.32067972                          | 0.62169738                            |
| 40.28169014                                                  | 0.852112676                                     | 44.43133918                          | 0.627851569                           |
| 14.775                                                       | 0.90625                                         | 22.32953163                          | 0.661206241                           |
| 23.57446809                                                  | 1                                               | 48.65439586                          | 0.723314426                           |
| 25.43                                                        | 0.985                                           | 43.96538922                          | 0.664130305                           |
| 31.65234375                                                  | 0.9765625                                       | 45.26001483                          | 0.669513562                           |
| 25.56589147                                                  | 0.970930233                                     | 49.63825753                          | 0.714165575                           |
| 89.09722222                                                  | 1                                               | 288.8153622                          | 0.730419983                           |
| 10.875                                                       | 1                                               | 7.859833015                          | 0.672789106                           |
| 34.21052632                                                  | 0.947368421                                     | 46.01208752                          | 0.643280714                           |
| 13.92592593                                                  | 0.861111111                                     | 20.53202203                          | 0.59837316                            |
| 25.6259542                                                   | 0.982824427                                     | 45.01182683                          | 0.67688207                            |
| 17.60869565                                                  | 1                                               | 21.86029781                          | 0.654486576                           |
| 28.08490566                                                  | 0.971698113                                     | 43.82977292                          | 0.641277942                           |
| 14.88721805                                                  | 0.994360902                                     | 23.38016694                          | 0.688167088                           |
| 19.17647059                                                  | 0.985294118                                     | 22.87890152                          | 0.691779793                           |
| 18.67195767                                                  | 0.972222222                                     | 24.06019565                          | 0.714924973                           |
| 15.30941704                                                  | 0.983183857                                     | 24.58645225                          | 0.720724164                           |
| 26.83943662                                                  | 0.983098592                                     | 47.47167166                          | 0.670806784                           |
| 20.63636364                                                  | 0.945454545                                     | 41.25552897                          | 0.601238581                           |
| 21.21428571                                                  | 0.959821429                                     | 22.4848782                           | 0.670193507                           |
| 18.96774194                                                  | 0.927419355                                     | 21.18228311                          | 0.658874168                           |
| 28.6635514                                                   | 0.957943925                                     | 44.35877812                          | 0.684584153                           |
| 18.76875                                                     | 0.953125                                        | 22.01800377                          | 0.673192798                           |
| 29.54347826                                                  | 0.983695652                                     | 40.23393344                          | 0.638918826                           |
| 23.29411765                                                  | 0.963235294                                     | 41.26046195                          | 0.57298165                            |
| 121.6049383                                                  | 0.939814815                                     | 270.3421105                          | 0.59570827                            |
| 14                                                           | 0.90625                                         | 24.93626959                          | 0.683580605                           |
| 17.53846154                                                  | 0.980769231                                     | 24.09577495                          | 0.698332656                           |
| 53.82                                                        | 0.9025                                          | 81.34751909                          | 0.716000485                           |
| 13.73469388                                                  | 0.984693878                                     | 22.98678395                          | 0.689679796                           |
| 27.69642857                                                  | 0.933035714                                     | 42.88676507                          | 0.643835151                           |
| 13                                                           | 1                                               | 25.24745149                          | 0.655173164                           |
| 17                                                           | 0.942307692                                     | 40.53244376                          | 0.596922822                           |
| 49.46835443                                                  | 0.952531646                                     | 114.6612842                          | 0.663807979                           |
| 37.21212121                                                  | 0.988636364                                     | 68.22928834                          | 0.614160292                           |
| 28.70689655                                                  | 0.935344828                                     | 44.61926055                          | 0.6492267                             |
| 27.8872549                                                   | 0.952205882                                     | 46.29655619                          | 0.685571857                           |
| 26.03557312                                                  | 0.979249012                                     | 47.73420484                          | 0.70573954                            |
| 33                                                           | 0.973214286                                     | 38.51340588                          | 0.562617113                           |
| 30.51666667                                                  | 1                                               | 79.29940982                          | 0.680892008                           |
| 14.625                                                       | 0.90625                                         | 22.94218014                          | 0.628983301                           |
| 18.82352941                                                  | 0.955882353                                     | 25.83957117                          | 0.703834416                           |
| 22.05882353                                                  | 0.985294118                                     | 22.18444262                          | 0.664167171                           |

| log.sigma.0.5.mm.3D_glcM_Homogeneity2 | log.sigma.0.5.mm.3D_glcM_ClusterShade | log.sigma.0.5.mm.3D_glcM_MaximumProbability | log.sigma.0.5.mm.3D_glcM_IcMn | log.sigma.0.5.mm.3D_glcM_SumVariance2 |
|---------------------------------------|---------------------------------------|---------------------------------------------|-------------------------------|---------------------------------------|
| 0.594628716                           | 0.841106635                           | 0.212395376                                 | 0.967689174                   | 1.859558729                           |
| 0.679015174                           | 0.389844034                           | 0.268054393                                 | 0.972413912                   | 1.26953727                            |
| 0.616493165                           | 2.165705999                           | 0.290058537                                 | 0.957776754                   | 1.85538826                            |
| 0.56541652                            | 1.016812809                           | 0.162811246                                 | 0.978882474                   | 2.438710375                           |
| 0.693217272                           | 0.09539275                            | 0.253842143                                 | 0.968080697                   | 1.065143256                           |
| 0.664306976                           | 0.071602089                           | 0.22193636                                  | 0.97191703                    | 1.175558441                           |
| 0.656164187                           | -0.749615977                          | 0.271872649                                 | 0.960085899                   | 1.198181485                           |
| 0.598246062                           | 0.151166464                           | 0.172419455                                 | 0.967788784                   | 1.941694043                           |
| 0.64187418                            | 0.033239823                           | 0.202638593                                 | 0.974510879                   | 1.633605607                           |
| 0.657255591                           | 0.667110322                           | 0.280325879                                 | 0.981023716                   | 1.427919607                           |
| 0.68347582                            | 0.017048557                           | 0.247871253                                 | 0.965710014                   | 1.014775838                           |
| 0.609366818                           | 0.467845386                           | 0.2351269                                   | 0.979282714                   | 1.88922397                            |
| 0.690490559                           | 0.236381166                           | 0.241925973                                 | 0.982080071                   | 1.059305952                           |
| 0.722982096                           | 0.24614648                            | 0.280416768                                 | 0.957851525                   | 0.999026271                           |
| 0.637510302                           | -0.023177484                          | 0.18541732                                  | 0.968549886                   | 1.302390168                           |
| 0.716259665                           | 0.466229606                           | 0.299177899                                 | 0.984394261                   | 0.902860261                           |
| 0.684242176                           | 0.014466578                           | 0.233110685                                 | 0.948266178                   | 1.158207206                           |
| 0.709760519                           | 0.334070968                           | 0.285188815                                 | 0.977848463                   | 1.077628338                           |
| 0.660751052                           | 0.140089096                           | 0.204940996                                 | 0.971050834                   | 1.466462433                           |
| 0.742667864                           | 0.261638217                           | 0.325357597                                 | 0.982156674                   | 0.829392722                           |
| 0.681696179                           | 0.544305536                           | 0.323491016                                 | 0.98009602                    | 1.103837311                           |
| 0.665261708                           | 0.517890534                           | 0.237067389                                 | 0.98344879                    | 1.269734369                           |
| 0.736089311                           | 0.459072225                           | 0.375223012                                 | 0.980800772                   | 0.895512312                           |
| 0.612122044                           | -0.527579348                          | 0.217045887                                 | 0.960750535                   | 1.698407232                           |
| 0.701635626                           | 0.558766952                           | 0.354174545                                 | 0.97567607                    | 1.005786838                           |
| 0.650139918                           | 0.405841137                           | 0.264863082                                 | 0.967214697                   | 1.442296892                           |
| 0.685868349                           | 0.313038288                           | 0.279665476                                 | 0.981059808                   | 1.051849912                           |
| 0.680728222                           | 1.053953438                           | 0.350147649                                 | 0.982632891                   | 1.308165274                           |
| 0.643226345                           | -0.127442911                          | 0.196213823                                 | 0.965435012                   | 1.641607353                           |
| 0.68941393                            | 0.524145536                           | 0.312380962                                 | 0.980455329                   | 1.126318318                           |
| 0.690958496                           | 0.782949382                           | 0.355860359                                 | 0.980101357                   | 1.118436151                           |
| 0.744938186                           | 0.274415227                           | 0.315692892                                 | 0.976408277                   | 0.815321716                           |
| 0.602814007                           | 0.277244121                           | 0.165405165                                 | 0.979674009                   | 1.947619191                           |
| 0.56544224                            | -0.764094152                          | 0.210605618                                 | 0.962768673                   | 2.181757623                           |
| 0.57138263                            | -0.116814143                          | 0.154948774                                 | 0.952973782                   | 2.03280985                            |
| 0.673873749                           | 0.036494653                           | 0.221489292                                 | 0.972900426                   | 1.258844828                           |
| 0.626774061                           | 1.13293702                            | 0.260344257                                 | 0.971009988                   | 1.757869655                           |
| 0.638400452                           | 0.290416515                           | 0.241999157                                 | 0.980112578                   | 1.448772517                           |
| 0.684942199                           | -0.163415068                          | 0.249726425                                 | 0.951253056                   | 0.975520944                           |
| 0.622560117                           | 0.356349335                           | 0.208019721                                 | 0.978078779                   | 1.65791291                            |
| 0.640210151                           | 0.311441984                           | 0.227965036                                 | 0.965868728                   | 1.466602397                           |
| 0.665977463                           | 0.227431283                           | 0.227067812                                 | 0.970588296                   | 1.396484921                           |
| 0.642081586                           | -0.104450414                          | 0.193514644                                 | 0.975273254                   | 1.486748442                           |
| 0.629236742                           | 0.295839613                           | 0.187778835                                 | 0.972208018                   | 1.692549309                           |
| 0.626953866                           | -0.135465586                          | 0.189095215                                 | 0.978587205                   | 1.575512917                           |
| 0.68354149                            | 0.543146796                           | 0.296481822                                 | 0.981134194                   | 1.081014533                           |
| 0.593279771                           | 0.221270449                           | 0.17458992                                  | 0.982422276                   | 1.953874026                           |
| 0.638791819                           | 0.297072127                           | 0.232488356                                 | 0.966525199                   | 1.473911479                           |
| 0.645217693                           | -1.393721563                          | 0.282820227                                 | 0.956442571                   | 1.52954314                            |
| 0.625090401                           | -0.433240207                          | 0.233707176                                 | 0.973183389                   | 1.540233565                           |
| 0.656631057                           | 0.291183965                           | 0.229121826                                 | 0.982336502                   | 1.282349431                           |
| 0.632599212                           | -0.020118385                          | 0.191866182                                 | 0.966308408                   | 1.488553069                           |
| 0.64971771                            | 0.291702362                           | 0.227872682                                 | 0.985133738                   | 1.428493111                           |
| 0.662933847                           | 0.170165859                           | 0.206914037                                 | 0.962816692                   | 1.141216462                           |
| 0.681974794                           | 0.362401647                           | 0.259823966                                 | 0.980680247                   | 1.147451783                           |
| 0.555390029                           | 0.29615021                            | 0.139825848                                 | 0.959061264                   | 2.415015162                           |
| 0.587484589                           | 0.174311013                           | 0.162348966                                 | 0.972917612                   | 2.119116297                           |
| 0.596033999                           | -0.990019295                          | 0.224089804                                 | 0.967822823                   | 1.90584656                            |
| 0.638464743                           | 0.030738788                           | 0.214585489                                 | 0.974463825                   | 1.441405752                           |
| 0.711905679                           | 0.166726996                           | 0.316905444                                 | 0.978532551                   | 0.945952183                           |
| 0.640159841                           | 0.429915209                           | 0.237786                                    | 0.974809587                   | 1.508179778                           |
| 0.645725382                           | 0.724714398                           | 0.223774143                                 | 0.979638446                   | 1.610139828                           |
| 0.701612624                           | 0.268890884                           | 0.282459835                                 | 0.982903349                   | 0.97258934                            |
| 0.721173199                           | -0.66896933                           | 0.274991097                                 | 0.994224912                   | 0.990914713                           |
| 0.6525821                             | 0.110610301                           | 0.214032592                                 | 0.941003365                   | 1.307540141                           |
| 0.614573124                           | 0.266672369                           | 0.175756559                                 | 0.976128372                   | 1.818755444                           |
| 0.559993313                           | -0.392353428                          | 0.151420997                                 | 0.952948578                   | 1.948462833                           |
| 0.655292432                           | 0.282456757                           | 0.232385035                                 | 0.981746687                   | 1.473935535                           |
| 0.630241785                           | 0.061736531                           | 0.195820778                                 | 0.9669948                     | 1.411586518                           |
| 0.611996806                           | 0.682032469                           | 0.216791094                                 | 0.980722023                   | 1.845445612                           |
| 0.668970039                           | 0.418066512                           | 0.279486607                                 | 0.971785592                   | 1.279979369                           |
| 0.674377626                           | 0.268415395                           | 0.241373469                                 | 0.973212702                   | 1.233747754                           |
| 0.700612242                           | 0.507559862                           | 0.313854641                                 | 0.981568096                   | 1.102578218                           |
| 0.708862515                           | 0.419726632                           | 0.320615584                                 | 0.987083421                   | 0.966542252                           |
| 0.649668325                           | 0.232854209                           | 0.194964911                                 | 0.980701131                   | 1.416789354                           |
| 0.564402473                           | -0.406172235                          | 0.150449992                                 | 0.976176405                   | 2.25267462                            |
| 0.647581706                           | 0.187974964                           | 0.212643732                                 | 0.968483749                   | 1.373219311                           |
| 0.633153285                           | 0.349583136                           | 0.235215486                                 | 0.965777508                   | 1.471115139                           |
| 0.663792402                           | 0.2190472                             | 0.269046244                                 | 0.977499923                   | 1.324191747                           |
| 0.649368209                           | 0.689266258                           | 0.260767144                                 | 0.974866858                   | 1.504022908                           |
| 0.608755788                           | 0.184650699                           | 0.208408771                                 | 0.969523055                   | 1.810374209                           |
| 0.527533454                           | -0.255029305                          | 0.115423633                                 | 0.963781473                   | 2.724095166                           |
| 0.55634199                            | -0.044668409                          | 0.136476993                                 | 0.987660912                   | 2.637507787                           |
| 0.665049718                           | -0.822412335                          | 0.270929303                                 | 0.960187698                   | 1.421326115                           |
| 0.681533569                           | 0.34568052                            | 0.271022513                                 | 0.980399118                   | 1.173512156                           |
| 0.70442017                            | 0.454920004                           | 0.271827256                                 | 0.99124047                    | 0.994118889                           |
| 0.672163057                           | 0.365395367                           | 0.272771574                                 | 0.973073311                   | 1.215246955                           |
| 0.616271613                           | -0.200492871                          | 0.178986083                                 | 0.972444111                   | 1.705322507                           |
| 0.633399737                           | -0.221306793                          | 0.229255948                                 | 0.956489007                   | 1.2961778                             |
| 0.556353483                           | -2.624885679                          | 0.23333419                                  | 0.943099055                   | 2.397073559                           |
| 0.640799524                           | -0.428671785                          | 0.197271782                                 | 0.986598429                   | 1.527066357                           |
| 0.579772536                           | 0.1010719147                          | 0.20943626                                  | 0.976340869                   | 2.227530162                           |
| 0.62348687                            | 0.301070819                           | 0.219084114                                 | 0.977914154                   | 1.525779576                           |
| 0.66596499                            | 0.363500971                           | 0.245303259                                 | 0.982324813                   | 1.298053976                           |
| 0.690815105                           | 0.470436172                           | 0.30289047                                  | 0.988324554                   | 1.093893822                           |
| 0.514203781                           | 1.286831299                           | 0.132636774                                 | 0.959534043                   | 3.199730761                           |
| 0.660543687                           | -1.063208339                          | 0.260473275                                 | 0.985039668                   | 1.505397522                           |
| 0.596996192                           | -0.40252526                           | 0.180382503                                 | 0.945927312                   | 1.755138012                           |
| 0.690067794                           | -0.138292532                          | 0.27571735                                  | 0.976111578                   | 1.128178397                           |
| 0.641822077                           | 1.307147489                           | 0.236618169                                 | 0.973501934                   | 1.616949382                           |

| log.sigma.0.5.mm.3D_glc_m_Contrast | log.sigma.0.5.mm.3D_glc_m_DifferenceEntropy | log.sigma.0.5.mm.3D_glc_m_InverseVariance | log.sigma.0.5.mm.3D_glc_m_Entropy | log.sigma.0.5.mm.3D_glc_m_Dissimilarity |
|------------------------------------|---------------------------------------------|-------------------------------------------|-----------------------------------|-----------------------------------------|
| 1.759193348                        | 1.780143989                                 | 0.4655202863                              | 3.86289804                        | 0.966430187                             |
| 1.108071235                        | 1.527472084                                 | 0.460634869                               | 3.263576031                       | 0.718503264                             |
| 1.791019111                        | 1.800595856                                 | 0.445114683                               | 3.652797607                       | 0.932046567                             |
| 2.284925869                        | 1.935658276                                 | 0.455753826                               | 4.263836638                       | 1.093569722                             |
| 0.885632909                        | 1.389805701                                 | 0.481318232                               | 2.954807502                       | 0.658683123                             |
| 1.108761554                        | 1.525735268                                 | 0.472154895                               | 3.255110699                       | 0.744021408                             |
| 1.138700371                        | 1.519879303                                 | 0.492502381                               | 3.106227994                       | 0.762546545                             |
| 1.757758785                        | 1.788768416                                 | 0.45509893                                | 3.929976511                       | 0.959468644                             |
| 1.369000481                        | 1.650045691                                 | 0.464549656                               | 3.639146875                       | 0.823650761                             |
| 1.313554096                        | 1.625858425                                 | 0.458573935                               | 3.432458626                       | 0.787488616                             |
| 0.959921752                        | 1.441800968                                 | 0.480155091                               | 3.050844922                       | 0.687418662                             |
| 1.833654325                        | 1.792302221                                 | 0.468697429                               | 3.810718577                       | 0.947828536                             |
| 0.933853028                        | 1.430417817                                 | 0.474307395                               | 3.048358834                       | 0.671375151                             |
| 0.776870456                        | 1.338644999                                 | 0.438830357                               | 2.858978604                       | 0.591174916                             |
| 1.258518784                        | 1.577595381                                 | 0.505552004                               | 3.421816136                       | 0.812944092                             |
| 0.820307053                        | 1.342060517                                 | 0.473502318                               | 2.770762941                       | 0.608466718                             |
| 0.978795289                        | 1.457615099                                 | 0.463499421                               | 3.144720131                       | 0.689395588                             |
| 0.866672813                        | 1.395300622                                 | 0.454007708                               | 2.990877707                       | 0.627937234                             |
| 1.146361155                        | 1.538627364                                 | 0.468562633                               | 3.414827168                       | 0.756253492                             |
| 0.688044744                        | 1.27119374                                  | 0.435919699                               | 2.619717752                       | 0.543428932                             |
| 1.050733766                        | 1.507310833                                 | 0.461810143                               | 3.099485347                       | 0.704962284                             |
| 1.12989851                         | 1.52287477                                  | 0.483406471                               | 3.276789769                       | 0.744558568                             |
| 0.742730406                        | 1.322310367                                 | 0.424955511                               | 2.695554939                       | 0.563604837                             |
| 1.609357615                        | 1.733560349                                 | 0.461868355                               | 3.752015786                       | 0.913122556                             |
| 0.966203957                        | 1.461352156                                 | 0.444737733                               | 2.927258331                       | 0.657528432                             |
| 1.337069342                        | 1.627282689                                 | 0.464780133                               | 3.48038663                        | 0.804203317                             |
| 1.000427368                        | 1.466725966                                 | 0.476135121                               | 3.054336411                       | 0.689155327                             |
| 1.197476878                        | 1.581902602                                 | 0.435213416                               | 3.219104003                       | 0.7299417                               |
| 1.409453933                        | 1.651394805                                 | 0.447588898                               | 3.621936726                       | 0.828106453                             |
| 1.038274097                        | 1.493640589                                 | 0.460401079                               | 3.114464076                       | 0.689648707                             |
| 1.059495805                        | 1.513806977                                 | 0.444223176                               | 3.057559879                       | 0.690348981                             |
| 0.638588738                        | 1.229943866                                 | 0.44593601                                | 2.572954126                       | 0.531522524                             |
| 1.772384608                        | 1.788325646                                 | 0.467517283                               | 3.941047346                       | 0.953188906                             |
| 2.059185845                        | 1.821764692                                 | 0.473637513                               | 3.829251885                       | 1.062720097                             |
| 1.969127268                        | 1.826583779                                 | 0.47855426                                | 4.015702276                       | 1.038727653                             |
| 1.069939364                        | 1.514371329                                 | 0.464411351                               | 3.285207034                       | 0.721622071                             |
| 1.583340513                        | 1.732808028                                 | 0.456571526                               | 3.708769426                       | 0.882929938                             |
| 1.365628791                        | 1.64896683                                  | 0.468532789                               | 3.524959042                       | 0.82883573                              |
| 0.902469263                        | 1.391920829                                 | 0.489340481                               | 2.960179984                       | 0.675507878                             |
| 1.515522797                        | 1.702121888                                 | 0.469843774                               | 3.707690907                       | 0.879591167                             |
| 1.392566334                        | 1.655170393                                 | 0.46762473                                | 3.553339899                       | 0.829393928                             |
| 1.178240622                        | 1.567867626                                 | 0.459334391                               | 3.41409058                        | 0.752390802                             |
| 1.319349979                        | 1.62017634                                  | 0.469122661                               | 3.533797576                       | 0.815402327                             |
| 1.505564438                        | 1.698616023                                 | 0.461350933                               | 3.70991191                        | 0.86676126                              |
| 1.484607755                        | 1.685253517                                 | 0.475757804                               | 3.655378579                       | 0.86622803                              |
| 0.98971447                         | 1.460549059                                 | 0.478044862                               | 3.060606867                       | 0.691915894                             |
| 1.88520288                         | 1.818091173                                 | 0.477540478                               | 3.97770618                        | 0.984117733                             |
| 1.352859826                        | 1.638938063                                 | 0.466421                                  | 3.537953198                       | 0.826103694                             |
| 1.259898395                        | 1.575574871                                 | 0.4799416                                 | 3.26861876                        | 0.800705794                             |
| 1.439122069                        | 1.665578006                                 | 0.473067187                               | 3.56194522                        | 0.862973729                             |
| 1.20687863                         | 1.570680119                                 | 0.479186486                               | 3.367132533                       | 0.772246576                             |
| 1.350004322                        | 1.626344433                                 | 0.470543523                               | 3.538968697                       | 0.836827748                             |
| 1.272344091                        | 1.601261331                                 | 0.475631287                               | 3.477432217                       | 0.794498628                             |
| 1.043846685                        | 1.474377428                                 | 0.501550857                               | 3.191099612                       | 0.735709277                             |
| 1.017614166                        | 1.469709067                                 | 0.478912374                               | 3.147270084                       | 0.699148062                             |
| 2.298113162                        | 1.936838956                                 | 0.457521378                               | 4.274947099                       | 1.115991586                             |
| 1.901000233                        | 1.815108234                                 | 0.462157625                               | 4.027462869                       | 1.000123189                             |
| 1.762574709                        | 1.775462608                                 | 0.472205077                               | 3.847174196                       | 0.963087388                             |
| 1.38275112                         | 1.637363815                                 | 0.484053248                               | 3.512239685                       | 0.830046882                             |
| 0.839133811                        | 1.374692586                                 | 0.458645098                               | 2.829353575                       | 0.619361012                             |
| 1.349338809                        | 1.638645276                                 | 0.469791854                               | 3.563364934                       | 0.823210095                             |
| 1.41475367                         | 1.668475299                                 | 0.45788905                                | 3.617193276                       | 0.823154618                             |
| 0.893420397                        | 1.408280927                                 | 0.46709788                                | 2.916662431                       | 0.645769402                             |
| 0.881150311                        | 1.347677231                                 | 0.460335192                               | 2.787007569                       | 0.603929299                             |
| 1.127801929                        | 1.518579799                                 | 0.487621996                               | 3.308402476                       | 0.76696821                              |
| 1.669568302                        | 1.752768593                                 | 0.466567534                               | 3.836317132                       | 0.916914466                             |
| 1.937089075                        | 1.807016795                                 | 0.477889143                               | 3.952176134                       | 1.054605588                             |
| 1.248686908                        | 1.597945852                                 | 0.464602534                               | 3.493815577                       | 0.781536713                             |
| 1.3182915                          | 1.611697304                                 | 0.488772428                               | 3.505303145                       | 0.835394915                             |
| 1.679483134                        | 1.756460818                                 | 0.46634129                                | 3.833395252                       | 0.922092593                             |
| 1.120495768                        | 1.535818513                                 | 0.463500102                               | 3.281429199                       | 0.738089524                             |
| 1.059585438                        | 1.502592999                                 | 0.471575655                               | 3.251572568                       | 0.718725628                             |
| 0.976007053                        | 1.464112286                                 | 0.4495504                                 | 3.049781434                       | 0.660693034                             |
| 0.870512697                        | 1.399090167                                 | 0.459489096                               | 2.895691155                       | 0.629718365                             |
| 1.335595256                        | 1.6252235                                   | 0.477560565                               | 3.48226295                        | 0.804024126                             |
| 2.099750105                        | 1.866461802                                 | 0.478818685                               | 4.130100809                       | 1.067863241                             |
| 1.263547268                        | 1.597802165                                 | 0.470342269                               | 3.452210038                       | 0.797066718                             |
| 1.376933016                        | 1.64548932                                  | 0.466555448                               | 3.54691964                        | 0.840394689                             |
| 1.19790622                         | 1.575376026                                 | 0.456424797                               | 3.370347222                       | 0.75890407                              |
| 1.354821254                        | 1.649587851                                 | 0.452007541                               | 3.532260608                       | 0.808112822                             |
| 1.663799403                        | 1.746778013                                 | 0.465093145                               | 3.812643851                       | 0.925784897                             |
| 2.611266256                        | 2.005735557                                 | 0.455837965                               | 4.466094608                       | 1.209481901                             |
| 2.548197159                        | 1.989086917                                 | 0.457955894                               | 4.381001743                       | 1.143628731                             |
| 1.147459649                        | 1.524663923                                 | 0.476910271                               | 3.239483883                       | 0.749097831                             |
| 1.029720414                        | 1.489819947                                 | 0.463494558                               | 3.176087388                       | 0.702061867                             |
| 0.912392866                        | 1.409124872                                 | 0.470015789                               | 2.916457135                       | 0.643115528                             |
| 1.063586949                        | 1.502729129                                 | 0.474901066                               | 3.231478024                       | 0.723232678                             |
| 1.47459555                         | 1.675254173                                 | 0.480594641                               | 3.709439302                       | 0.884363071                             |
| 1.242625543                        | 1.479186898                                 | 0.508327354                               | 3.281204                          | 0.817978124                             |
| 2.512593941                        | 1.937966204                                 | 0.445830134                               | 3.796108374                       | 1.144078773                             |
| 1.421792024                        | 1.656972212                                 | 0.475700817                               | 3.560953264                       | 0.830958706                             |
| 2.104123211                        | 1.876181827                                 | 0.470541458                               | 4.07883325                        | 1.040235717                             |
| 1.540319717                        | 1.701427406                                 | 0.481048149                               | 3.643253904                       | 0.880340173                             |
| 1.215775087                        | 1.580881181                                 | 0.462620703                               | 3.357234817                       | 0.757417028                             |
| 0.991259078                        | 1.469819231                                 | 0.463557886                               | 3.063283122                       | 0.679502477                             |
| 2.951416647                        | 2.062179486                                 | 0.443547214                               | 4.568367624                       | 1.284062968                             |
| 1.303334338                        | 1.605693724                                 | 0.464480576                               | 3.409611074                       | 0.777711495                             |
| 1.586904389                        | 1.674110453                                 | 0.467688988                               | 3.667688988                       | 0.934858154                             |
| 0.934339333                        | 1.426678213                                 | 0.477991838                               | 3.008267782                       | 0.672100621                             |
| 1.451970453                        | 1.659182026                                 | 0.478386344                               | 3.542943383                       | 0.835002942                             |

| log.sigma.0.5.mm.3D_glmc_DifferenceVariance | log.sigma.0.5.mm.3D_glmc_lfn | log.sigma.0.5.mm.3D_glmc_lfm | log.sigma.0.5.mm.3D_glmc_Correlation | log.sigma.0.5.mm.3D_glmc_Autocorrelation |
|---------------------------------------------|------------------------------|------------------------------|--------------------------------------|------------------------------------------|
| 0.821211369                                 | 0.889453065                  | 0.594628716                  | 0.027134318                          | 11.8987548                               |
| 0.588750964                                 | 0.903846251                  | 0.679015174                  | 0.066832756                          | 11.9003709                               |
| 0.920458695                                 | 0.880615851                  | 0.616493165                  | 0.016479835                          | 5.912714359                              |
| 1.086596501                                 | 0.908835401                  | 0.56541652                   | 0.032245948                          | 30.64196226                              |
| 0.448266118                                 | 0.895449222                  | 0.693217272                  | 0.091710408                          | 6.301114363                              |
| 0.553521404                                 | 0.899975234                  | 0.664306976                  | 0.029140101                          | 11.84839315                              |
| 0.551535884                                 | 0.881400583                  | 0.656164187                  | 0.028873096                          | 11.898652                                |
| 0.834376427                                 | 0.890372297                  | 0.598246062                  | 0.04980764                           | 19.8749086                               |
| 0.689266                                    | 0.904158238                  | 0.64187418                   | 0.088176042                          | 19.72958258                              |
| 0.692067659                                 | 0.917945351                  | 0.657255591                  | 0.041055885                          | 19.636146                                |
| 0.485617113                                 | 0.891676205                  | 0.68347582                   | 0.027470724                          | 11.69608438                              |
| 0.928214403                                 | 0.912532617                  | 0.609366818                  | 0.012134091                          | 29.67764298                              |
| 0.480322917                                 | 0.919605049                  | 0.690490559                  | 0.063285905                          | 12.22581948                              |
| 0.422487318                                 | 0.887832177                  | 0.722982096                  | 0.124466798                          | 6.207265008                              |
| 0.597175978                                 | 0.891365882                  | 0.637510302                  | 0.017056449                          | 12.33179825                              |
| 0.448016133                                 | 0.926669616                  | 0.716259665                  | 0.048074919                          | 11.98767315                              |
| 0.499029509                                 | 0.87143684                   | 0.684242176                  | 0.083384965                          | 6.001998232                              |
| 0.46797676                                  | 0.914371533                  | 0.709760519                  | 0.107534789                          | 12.01089887                              |
| 0.568187002                                 | 0.898650273                  | 0.660751052                  | 0.121931444                          | 12.29116354                              |
| 0.388444365                                 | 0.924848132                  | 0.742667864                  | 0.092336376                          | 11.93645498                              |
| 0.553514204                                 | 0.916451878                  | 0.681696179                  | 0.024514012                          | 11.64808217                              |
| 0.569512456                                 | 0.921317089                  | 0.665261708                  | 0.058201448                          | 20.23907705                              |
| 0.420986374                                 | 0.922591065                  | 0.736089311                  | 0.092173563                          | 11.61617041                              |
| 0.771995736                                 | 0.881124654                  | 0.612122044                  | 0.027078135                          | 12.5344825                               |
| 0.532091024                                 | 0.911257767                  | 0.701635626                  | 0.019831156                          | 5.701944602                              |
| 0.687161352                                 | 0.89391712                   | 0.650139918                  | 0.035692334                          | 11.48549406                              |
| 0.524995354                                 | 0.917933072                  | 0.685868349                  | 0.025123943                          | 19.88349575                              |
| 0.663359272                                 | 0.923755556                  | 0.680728222                  | 0.043131797                          | 19.22548288                              |
| 0.706597988                                 | 0.891374244                  | 0.643226345                  | 0.078392428                          | 12.49977203                              |
| 0.561647558                                 | 0.918336191                  | 0.68941393                   | 0.040436176                          | 11.52119218                              |
| 0.581599554                                 | 0.918521454                  | 0.690958496                  | 0.027033064                          | 11.46662242                              |
| 0.352843543                                 | 0.913900171                  | 0.744938186                  | 0.12105578                           | 6.104604565                              |
| 0.85960695                                  | 0.911607281                  | 0.602814007                  | 0.047150886                          | 20.32471928                              |
| 0.91979401                                  | 0.879846664                  | 0.56544224                   | 0.029891422                          | 11.84264756                              |
| 0.879820163                                 | 0.866784102                  | 0.57138263                   | 0.017618997                          | 11.92365782                              |
| 0.548029882                                 | 0.902881083                  | 0.673873749                  | 0.080812786                          | 12.02710609                              |
| 0.801470912                                 | 0.898610639                  | 0.626774061                  | 0.051647989                          | 11.84165437                              |
| 0.678409561                                 | 0.913556537                  | 0.638400452                  | 0.029452289                          | 30.06438474                              |
| 0.440010286                                 | 0.872313465                  | 0.684942199                  | 0.039819924                          | 6.378894806                              |
| 0.740397005                                 | 0.908908769                  | 0.622560117                  | 0.044609402                          | 19.698116                                |
| 0.701167439                                 | 0.890752877                  | 0.640210151                  | 0.025545416                          | 12.00777734                              |
| 0.610525837                                 | 0.899690469                  | 0.665977463                  | 0.084639724                          | 11.86906053                              |
| 0.647727686                                 | 0.904708454                  | 0.642081586                  | 0.059913685                          | 19.81213424                              |
| 0.74763595                                  | 0.899920262                  | 0.629236742                  | 0.057993017                          | 11.96987028                              |
| 0.730713281                                 | 0.910166823                  | 0.626953866                  | 0.030111352                          | 19.87052549                              |
| 0.509167805                                 | 0.917467259                  | 0.68354149                   | 0.042477703                          | 11.85231786                              |
| 0.915560028                                 | 0.91682285                   | 0.593279771                  | 0.017816304                          | 42.35572884                              |
| 0.668987944                                 | 0.890822426                  | 0.638791819                  | 0.042104845                          | 11.83826022                              |
| 0.61310137                                  | 0.876835806                  | 0.645217693                  | 0.098380666                          | 11.71811818                              |
| 0.691008395                                 | 0.899673607                  | 0.625090401                  | 0.034728248                          | 20.00129586                              |
| 0.608466285                                 | 0.918772498                  | 0.656631057                  | 0.030453061                          | 19.91526199                              |
| 0.642626524                                 | 0.889178516                  | 0.632599212                  | 0.048942884                          | 11.53509347                              |
| 0.638556538                                 | 0.924677681                  | 0.64991771                   | 0.056852343                          | 29.8169918                               |
| 0.501496521                                 | 0.884447714                  | 0.662933847                  | 0.044886969                          | 6.292582844                              |
| 0.524881845                                 | 0.916808169                  | 0.681974794                  | 0.060449597                          | 12.00850295                              |
| 1.049716837                                 | 0.87534039                   | 0.555390029                  | 0.024707517                          | 11.83567732                              |
| 0.879655365                                 | 0.898142933                  | 0.587484589                  | 0.053963091                          | 19.88765157                              |
| 0.82385688                                  | 0.889858466                  | 0.596033999                  | 0.040199467                          | 20.2534459                               |
| 0.692172632                                 | 0.903339858                  | 0.638464743                  | 0.020683031                          | 11.76793801                              |
| 0.45407981                                  | 0.91525725                   | 0.711905679                  | 0.058712622                          | 19.69482216                              |
| 0.669672266                                 | 0.903984853                  | 0.640159841                  | 0.055640745                          | 19.57302084                              |
| 0.734554837                                 | 0.914646647                  | 0.645725382                  | 0.064723521                          | 20.16240968                              |
| 0.473730655                                 | 0.92257048                   | 0.701612624                  | 0.043152838                          | 20.14352002                              |
| 0.515044263                                 | 0.954879821                  | 0.721173199                  | 0.057749211                          | 89.528424                                |
| 0.53662966                                  | 0.858187853                  | 0.6525821                    | 0.073139713                          | 5.724059066                              |
| 0.825139071                                 | 0.905861338                  | 0.614573124                  | 0.042855288                          | 20.79273193                              |
| 0.819216144                                 | 0.864049305                  | 0.559993313                  | 0.003838012                          | 11.58763147                              |
| 0.635721486                                 | 0.918092007                  | 0.655292432                  | 0.082155064                          | 19.8941452                               |
| 0.619420258                                 | 0.888874025                  | 0.630241785                  | 0.034046611                          | 11.58112582                              |
| 0.824106938                                 | 0.914194363                  | 0.611996806                  | 0.047475258                          | 20.03225824                              |
| 0.571164919                                 | 0.901068952                  | 0.668970039                  | 0.065214167                          | 11.92215416                              |
| 0.541363324                                 | 0.903129739                  | 0.674377626                  | 0.075443504                          | 11.70673943                              |
| 0.537712133                                 | 0.921534269                  | 0.700612242                  | 0.060741412                          | 11.81808237                              |
| 0.473119811                                 | 0.932588617                  | 0.708862515                  | 0.051850162                          | 11.73935288                              |
| 0.687939678                                 | 0.916156398                  | 0.649668325                  | 0.029046727                          | 20.53399415                              |
| 0.949233618                                 | 0.901835422                  | 0.564402473                  | 0.029096845                          | 19.61000419                              |
| 0.624466807                                 | 0.894015446                  | 0.647581706                  | 0.041769941                          | 11.76632059                              |
| 0.666655839                                 | 0.8890215                    | 0.633153285                  | 0.032187925                          | 11.37197206                              |
| 0.618028087                                 | 0.910911909                  | 0.663792402                  | 0.049836857                          | 19.31694793                              |
| 0.7000291                                   | 0.906082559                  | 0.649368209                  | 0.052260373                          | 11.72915341                              |
| 0.802966098                                 | 0.893761831                  | 0.608755788                  | 0.040649678                          | 18.73968832                              |
| 1.144631772                                 | 0.879655099                  | 0.527533454                  | 0.021495738                          | 20.11903847                              |
| 1.233819441                                 | 0.9291227                    | 0.55634199                   | 0.017674526                          | 91.09643843                              |
| 0.581770305                                 | 0.884034189                  | 0.665049718                  | 0.107448324                          | 12.5421799                               |
| 0.533813325                                 | 0.916612885                  | 0.681533569                  | 0.064500392                          | 12.01624429                              |
| 0.497660816                                 | 0.943458988                  | 0.70442017                   | 0.042883204                          | 30.0763822                               |
| 0.539912896                                 | 0.902491614                  | 0.672163057                  | 0.066096482                          | 11.70476866                              |
| 0.688460399                                 | 0.897225526                  | 0.616271613                  | 0.072357361                          | 19.56656748                              |
| 0.533420852                                 | 0.87330524                   | 0.633399737                  | 0.024645525                          | 12.50438228                              |
| 1.181004453                                 | 0.857880425                  | 0.556353483                  | -0.021380295                         | 18.81385484                              |
| 0.729325914                                 | 0.928621703                  | 0.640799524                  | 0.034453965                          | 42.01784686                              |
| 1.019706162                                 | 0.904744929                  | 0.579772536                  | 0.02610764                           | 28.69776284                              |
| 0.763244484                                 | 0.908967129                  | 0.62348687                   | -0.004649668                         | 19.75939537                              |
| 0.639637295                                 | 0.920616869                  | 0.66596499                   | 0.032611836                          | 19.90191656                              |
| 0.528671857                                 | 0.934755503                  | 0.690815105                  | 0.048994195                          | 19.84190806                              |
| 1.283773761                                 | 0.873846239                  | 0.514203781                  | 0.041095297                          | 19.31545194                              |
| 0.696558505                                 | 0.926620715                  | 0.660543687                  | 0.06905018                           | 30.82430645                              |
| 0.708661944                                 | 0.858804311                  | 0.596996192                  | 0.052040688                          | 12.20460194                              |
| 0.480707323                                 | 0.908482905                  | 0.690067794                  | 0.093173476                          | 12.47210344                              |
| 0.75176644                                  | 0.903423438                  | 0.641822077                  | 0.052634309                          | 11.82698879                              |

| log.sigma.0.5.mm.3D_glc_m_SumEntropy | log.sigma.0.5.mm.3D_glc_m_AverageIntensity | log.sigma.0.5.mm.3D_glc_m_Energy | log.sigma.0.5.mm.3D_glc_m_SumSquares | log.sigma.0.5.mm.3D_glc_m_ClusterProminence |
|--------------------------------------|--------------------------------------------|----------------------------------|--------------------------------------|---------------------------------------------|
| 2.461781524                          | 3.445794875                                | 0.098021309                      | 0.904688019                          | 10.47978366                                 |
| 2.189301464                          | 3.443825241                                | 0.154146168                      | 0.594402126                          | 5.796277606                                 |
| 2.382415148                          | 2.428203074                                | 0.1301484                        | 0.911601843                          | 14.52689134                                 |
| 2.669574866                          | 5.532034089                                | 0.07841839                       | 1.180909061                          | 21.40594554                                 |
| 2.054408641                          | 2.501185464                                | 0.170790358                      | 0.487694041                          | 3.933907646                                 |
| 2.147885636                          | 3.439782767                                | 0.142064097                      | 0.571079999                          | 3.86997971                                  |
| 2.110707739                          | 3.447235093                                | 0.161761604                      | 0.584220464                          | 4.693056313                                 |
| 2.505533762                          | 4.452927268                                | 0.089467465                      | 0.924863207                          | 10.54732538                                 |
| 2.388061205                          | 4.434335413                                | 0.115486588                      | 0.750651522                          | 8.550695128                                 |
| 2.258405089                          | 4.42803648                                 | 0.146162108                      | 0.685368426                          | 8.393404732                                 |
| 2.044066821                          | 3.417910456                                | 0.161510032                      | 0.493674397                          | 2.985048028                                 |
| 2.459731233                          | 5.446419094                                | 0.113732697                      | 0.930719574                          | 14.71378483                                 |
| 2.067728704                          | 3.492045348                                | 0.164659051                      | 0.498289745                          | 3.915189743                                 |
| 2.002229934                          | 2.48023909                                 | 0.182037284                      | 0.443974182                          | 2.782777227                                 |
| 2.22690053                           | 3.510097091                                | 0.130627253                      | 0.640227238                          | 5.540101151                                 |
| 1.925537156                          | 3.459337343                                | 0.2006026                        | 0.430791828                          | 3.597801021                                 |
| 2.130085332                          | 2.440603988                                | 0.149996765                      | 0.534250624                          | 3.63771658                                  |
| 2.069653022                          | 3.458035242                                | 0.175870853                      | 0.486075288                          | 3.717689257                                 |
| 2.296933439                          | 3.494371719                                | 0.124906427                      | 0.653205897                          | 5.951522924                                 |
| 1.864256024                          | 3.449788971                                | 0.214030884                      | 0.379359366                          | 2.086708257                                 |
| 2.076738851                          | 3.410981915                                | 0.176968879                      | 0.538642769                          | 4.377281554                                 |
| 2.186513353                          | 4.494881152                                | 0.147463249                      | 0.59990822                           | 6.031039355                                 |
| 1.898891652                          | 3.402632291                                | 0.220321062                      | 0.40956068                           | 2.564109734                                 |
| 2.401674852                          | 3.537233022                                | 0.106427926                      | 0.826941212                          | 8.832575038                                 |
| 1.993537693                          | 2.385796825                                | 0.198849941                      | 0.492997699                          | 3.839147131                                 |
| 2.27569365                           | 3.38511427                                 | 0.135636801                      | 0.694841558                          | 7.394216306                                 |
| 2.04890565                           | 4.457647886                                | 0.172654073                      | 0.51306932                           | 4.406577652                                 |
| 2.157027702                          | 4.381520213                                | 0.179252525                      | 0.626410538                          | 7.21787324                                  |
| 2.377013275                          | 3.527218598                                | 0.112924935                      | 0.762765321                          | 7.488553403                                 |
| 2.096500918                          | 3.391040033                                | 0.174665862                      | 0.541148104                          | 5.008981064                                 |
| 2.061278338                          | 3.384059667                                | 0.19059006                       | 0.544482989                          | 5.063659526                                 |
| 1.856763444                          | 2.461782737                                | 0.215784116                      | 0.363477613                          | 2.03014541                                  |
| 2.515907299                          | 4.509422875                                | 0.094468032                      | 0.93000095                           | 12.19130205                                 |
| 2.487761065                          | 3.436426417                                | 0.103047017                      | 1.060235867                          | 16.17947171                                 |
| 2.526378135                          | 3.450639239                                | 0.083430959                      | 1.00048428                           | 11.57502028                                 |
| 2.200318513                          | 3.461184586                                | 0.139872623                      | 0.582196048                          | 4.463828222                                 |
| 2.412461047                          | 3.434813351                                | 0.120525209                      | 0.835302542                          | 10.5510601                                  |
| 2.295499906                          | 5.481198841                                | 0.1267932                        | 0.703600327                          | 6.878016984                                 |
| 2.007375568                          | 2.52199678                                 | 0.169192559                      | 0.469497552                          | 2.813218743                                 |
| 2.393600117                          | 4.434232547                                | 0.109601957                      | 0.793358927                          | 8.705522752                                 |
| 2.3050969                            | 3.462524451                                | 0.125493259                      | 0.714792183                          | 7.054805238                                 |
| 2.270312923                          | 3.437206578                                | 0.133020602                      | 0.643681386                          | 6.11768127                                  |
| 2.315054395                          | 4.446358816                                | 0.117825278                      | 0.701524605                          | 6.349030188                                 |
| 2.404694696                          | 3.45293304                                 | 0.109522769                      | 0.799528437                          | 9.145636941                                 |
| 2.358435322                          | 4.45508032                                 | 0.114603412                      | 0.765030168                          | 8.242490893                                 |
| 2.063377904                          | 3.439387499                                | 0.173144199                      | 0.517682251                          | 4.114403813                                 |
| 2.514233607                          | 6.506800288                                | 0.095708438                      | 0.959769226                          | 14.27243922                                 |
| 2.302722715                          | 3.436226765                                | 0.124460682                      | 0.706692826                          | 6.780242809                                 |
| 2.233095823                          | 3.413030371                                | 0.150549741                      | 0.697383134                          | 7.913384983                                 |
| 2.327349683                          | 4.469397044                                | 0.120210981                      | 0.744838908                          | 6.964168968                                 |
| 2.211967827                          | 4.460533824                                | 0.138002545                      | 0.622307015                          | 5.528982676                                 |
| 2.307324132                          | 3.391192116                                | 0.11337384                       | 0.709639348                          | 5.857178282                                 |
| 2.287258669                          | 5.456911676                                | 0.128525691                      | 0.675209301                          | 6.958308969                                 |
| 2.128092823                          | 2.503617538                                | 0.146186179                      | 0.546265787                          | 4.00671611                                  |
| 2.121489226                          | 3.460627886                                | 0.159025353                      | 0.541266487                          | 4.586112027                                 |
| 2.669982271                          | 3.436019629                                | 0.072281377                      | 1.178282081                          | 17.53797236                                 |
| 2.566687322                          | 4.453349164                                | 0.085312084                      | 1.005029133                          | 13.68719391                                 |
| 2.472121335                          | 4.496354686                                | 0.105239127                      | 0.917105317                          | 12.31518274                                 |
| 2.286495326                          | 3.428283191                                | 0.127911864                      | 0.706039218                          | 7.860173853                                 |
| 1.96269083                           | 4.434855472                                | 0.193356964                      | 0.446271498                          | 3.118683111                                 |
| 2.323532506                          | 4.41964045                                 | 0.122090876                      | 0.714379647                          | 7.102396718                                 |
| 2.36301939                           | 4.484810045                                | 0.121929248                      | 0.756223374                          | 9.6988278                                   |
| 1.95919752                           | 4.48594473                                 | 0.181981798                      | 0.466050434                          | 3.124596403                                 |
| 1.955724836                          | 9.460493451                                | 0.193746866                      | 0.468016256                          | 8.834723415                                 |
| 2.207270421                          | 2.383031082                                | 0.128863733                      | 0.608835518                          | 4.819589032                                 |
| 2.46396738                           | 4.555795231                                | 0.102573502                      | 0.872080937                          | 10.98403903                                 |
| 2.496554536                          | 3.403533331                                | 0.080465218                      | 0.971387977                          | 9.826176441                                 |
| 2.309807544                          | 4.453962068                                | 0.128093468                      | 0.680655611                          | 6.963325298                                 |
| 2.277526342                          | 3.399651352                                | 0.116092584                      | 0.682469504                          | 5.565441534                                 |
| 2.462997783                          | 4.471093907                                | 0.105264337                      | 0.881232187                          | 11.59831893                                 |
| 2.193366423                          | 3.44704409                                 | 0.149935312                      | 0.600118784                          | 5.109830045                                 |
| 2.177926343                          | 3.415120148                                | 0.146070297                      | 0.573332398                          | 4.962531336                                 |
| 2.074983919                          | 3.433126995                                | 0.180169581                      | 0.519646318                          | 4.552308586                                 |
| 1.985661451                          | 3.422766075                                | 0.19213234                       | 0.459263737                          | 3.423992037                                 |
| 2.272229724                          | 4.529200785                                | 0.134744479                      | 0.688096152                          | 8.236551917                                 |
| 2.602583991                          | 4.424741546                                | 0.078665185                      | 1.081254392                          | 15.48849549                                 |
| 2.257861814                          | 3.426181396                                | 0.127812455                      | 0.659191645                          | 5.917312582                                 |
| 2.298094166                          | 3.368699331                                | 0.118384696                      | 0.712012039                          | 6.272076696                                 |
| 2.22302369                           | 4.391497773                                | 0.142512377                      | 0.630524492                          | 5.51451565                                  |
| 2.309496969                          | 3.419326295                                | 0.129688715                      | 0.714711041                          | 7.972242128                                 |
| 2.450840381                          | 4.324644409                                | 0.103189789                      | 0.868543403                          | 10.61881645                                 |
| 2.756922953                          | 4.482247286                                | 0.06084385                       | 1.333840356                          | 21.51846919                                 |
| 2.725024478                          | 9.543270716                                | 0.073080633                      | 1.296426237                          | 27.07831306                                 |
| 2.214590383                          | 3.531625187                                | 0.151191992                      | 0.642196441                          | 6.923611972                                 |
| 2.135119735                          | 3.461251335                                | 0.155461206                      | 0.550808142                          | 4.225058956                                 |
| 2.00074452                           | 5.482330274                                | 0.184513375                      | 0.476627939                          | 4.44647746                                  |
| 2.165436541                          | 3.415645614                                | 0.150818593                      | 0.569708476                          | 4.519726178                                 |
| 2.416570247                          | 4.416828263                                | 0.101680229                      | 0.794979514                          | 8.06402083                                  |
| 2.175239633                          | 3.533854612                                | 0.135734557                      | 0.634700836                          | 5.161879355                                 |
| 2.507143552                          | 4.340429775                                | 0.109843995                      | 1.227416875                          | 18.37530492                                 |
| 2.323841243                          | 6.480083032                                | 0.12545308                       | 0.737214595                          | 10.1310649                                  |
| 2.584375269                          | 5.354127178                                | 0.093392056                      | 1.082913343                          | 18.945152                                   |
| 2.326703049                          | 4.445554001                                | 0.12001771                       | 0.766524823                          | 8.536605447                                 |
| 2.209753815                          | 4.458844505                                | 0.144587257                      | 0.628457266                          | 6.407518952                                 |
| 2.073829641                          | 4.451542818                                | 0.174781173                      | 0.521288225                          | 4.320565797                                 |
| 2.833647897                          | 4.387733872                                | 0.057440403                      | 1.537786852                          | 30.765447722                                |
| 2.274993847                          | 5.547397957                                | 0.143068232                      | 0.702182965                          | 12.24864769                                 |
| 2.372491591                          | 3.487193062                                | 0.098093102                      | 0.8355106                            | 8.517501591                                 |
| 2.078681787                          | 3.524695593                                | 0.17478847                       | 0.515629432                          | 4.919394616                                 |
| 2.331412692                          | 3.433013258                                | 0.131184328                      | 0.767229959                          | 12.13309568                                 |

| log.sigma.0.5.mm.3D_glcm_SumAverage | log.sigma.0.5.mm.3D_glcm_lmc2 | log.sigma.0.5.mm.3D_glcm_lmc1 | log.sigma.0.5.mm.3D_glcm_DifferenceAverage | log.sigma.0.5.mm.3D_glcm_Id |
|-------------------------------------|-------------------------------|-------------------------------|--------------------------------------------|-----------------------------|
| 6.891589749                         | 0.282960843                   | -0.022470882                  | 0.966430187                                | 0.627440109                 |
| 6.887650482                         | 0.268315832                   | -0.024479846                  | 0.718503264                                | 0.696375466                 |
| 4.856406147                         | 0.295477904                   | -0.025372049                  | 0.932046567                                | 0.646607915                 |
| 11.06406818                         | 0.25742905                    | -0.016935312                  | 1.093569722                                | 0.603817828                 |
| 5.002370928                         | 0.283868194                   | -0.029440486                  | 0.658683123                                | 0.706135585                 |
| 6.879565533                         | 0.228459156                   | -0.01677559                   | 0.744021408                                | 0.683656648                 |
| 6.894470187                         | 0.270383803                   | -0.025211359                  | 0.762546545                                | 0.675029882                 |
| 8.905845536                         | 0.283649849                   | -0.022479125                  | 0.959468644                                | 0.631388731                 |
| 8.868670826                         | 0.254417731                   | -0.018976821                  | 0.823650761                                | 0.665943318                 |
| 8.856072961                         | 0.242837759                   | -0.018541934                  | 0.787488616                                | 0.678832418                 |
| 6.835820912                         | 0.20025478                    | -0.014192623                  | 0.687418662                                | 0.698358266                 |
| 10.89283819                         | 0.329903487                   | -0.031760887                  | 0.947828536                                | 0.638476136                 |
| 6.984090697                         | 0.218775272                   | -0.017678264                  | 0.671375151                                | 0.704555055                 |
| 4.960478181                         | 0.270670753                   | -0.035343709                  | 0.591174916                                | 0.734288254                 |
| 7.020194182                         | 0.185234419                   | -0.01080308                   | 0.812944092                                | 0.658628806                 |
| 6.918674685                         | 0.234036067                   | -0.021935766                  | 0.608466718                                | 0.725226414                 |
| 4.881207977                         | 0.244093924                   | -0.021326424                  | 0.68995588                                 | 0.700641876                 |
| 6.916070483                         | 0.256836116                   | -0.026975103                  | 0.627937234                                | 0.722011                    |
| 6.988743438                         | 0.304026815                   | -0.032887017                  | 0.756253492                                | 0.681111222                 |
| 6.899577941                         | 0.246786814                   | -0.032187231                  | 0.543428932                                | 0.750314586                 |
| 6.821963831                         | 0.16288788                    | -0.009019864                  | 0.704962284                                | 0.698561392                 |
| 8.989762304                         | 0.243856439                   | -0.023516977                  | 0.744558568                                | 0.683162365                 |
| 6.805264582                         | 0.222911261                   | -0.028039047                  | 0.563604837                                | 0.746121391                 |
| 7.074466045                         | 0.275247955                   | -0.021822919                  | 0.913122556                                | 0.642054647                 |
| 4.771593651                         | 0.227136417                   | -0.020151793                  | 0.657528432                                | 0.716267101                 |
| 6.770222854                         | 0.310002037                   | -0.031088515                  | 0.804203317                                | 0.672502216                 |
| 8.915295772                         | 0.204783625                   | -0.014576762                  | 0.689155327                                | 0.700514712                 |
| 8.763040426                         | 0.257712181                   | -0.02257231                   | 0.7299411                                  | 0.700060067                 |
| 7.054437196                         | 0.31434283                    | -0.04170227                   | 0.828106453                                | 0.668632495                 |
| 6.782080065                         | 0.228276996                   | -0.017601087                  | 0.689648707                                | 0.704790772                 |
| 6.768119334                         | 0.20570873                    | -0.015171964                  | 0.690348981                                | 0.70763066                  |
| 4.923565475                         | 0.209125262                   | -0.0022597285                 | 0.531522524                                | 0.751220496                 |
| 9.00684575                          | 0.257991997                   | -0.018803302                  | 0.953188906                                | 0.633604817                 |
| 6.872852834                         | 0.518325676                   | -0.083096296                  | 1.062720097                                | 0.602676401                 |
| 6.901278477                         | 0.338078707                   | -0.031273553                  | 1.038727653                                | 0.607111549                 |
| 6.922369172                         | 0.22065193                    | -0.01629757                   | 0.721622071                                | 0.692095907                 |
| 6.869626703                         | 0.237543358                   | -0.017385846                  | 0.882929938                                | 0.654185011                 |
| 10.96239768                         | 0.190648253                   | -0.010793754                  | 0.82883573                                 | 0.662827514                 |
| 5.043993561                         | 0.20473951                    | -0.01739052                   | 0.675507878                                | 0.698757496                 |
| 8.868465095                         | 0.254427295                   | -0.019308337                  | 0.879591167                                | 0.64974276                  |
| 6.925048903                         | 0.238918341                   | -0.017496066                  | 0.829939928                                | 0.664233886                 |
| 6.874413155                         | 0.276494283                   | -0.023975668                  | 0.752390082                                | 0.686048411                 |
| 8.892717632                         | 0.269983543                   | -0.022776889                  | 0.815402327                                | 0.665811045                 |
| 6.905866079                         | 0.305886299                   | -0.027237574                  | 0.86676126                                 | 0.655891259                 |
| 8.91016064                          | 0.238896619                   | -0.017211498                  | 0.86622803                                 | 0.652711654                 |
| 6.878774997                         | 0.202156852                   | -0.014344491                  | 0.691915894                                | 0.698522163                 |
| 13.01360058                         | 0.220334987                   | -0.013060976                  | 0.984117733                                | 0.624760229                 |
| 6.872453529                         | 0.257916527                   | -0.020040418                  | 0.826103694                                | 0.663405358                 |
| 6.826060742                         | 0.380409213                   | -0.04935039                   | 0.800705794                                | 0.667339899                 |
| 8.938794087                         | 0.269874547                   | -0.02162557                   | 0.862973729                                | 0.65167379                  |
| 8.921067648                         | 0.200369355                   | -0.01382721                   | 0.772246576                                | 0.676551972                 |
| 6.782384232                         | 0.276198818                   | -0.025557739                  | 0.836827748                                | 0.658127993                 |
| 10.91382335                         | 0.23644678                    | -0.017940538                  | 0.794498628                                | 0.671278587                 |
| 5.007235075                         | 0.202816646                   | -0.013762641                  | 0.735709277                                | 0.679728006                 |
| 6.921255773                         | 0.256173487                   | -0.023834303                  | 0.699148062                                | 0.697096529                 |
| 6.872039259                         | 0.2732538                     | -0.018462656                  | 1.115991586                                | 0.595650714                 |
| 8.906698328                         | 0.330816274                   | -0.031899371                  | 1.000123189                                | 0.62169738                  |
| 8.992709371                         | 0.27552647                    | -0.021702446                  | 0.963087388                                | 0.627851569                 |
| 6.856566382                         | 0.277072041                   | -0.023406084                  | 0.830046882                                | 0.661206241                 |
| 8.869710945                         | 0.233559253                   | -0.021360395                  | 0.619361012                                | 0.723314426                 |
| 8.8392809                           | 0.23055411                    | -0.016503918                  | 0.823210095                                | 0.664130305                 |
| 8.969620091                         | 0.261620702                   | -0.021020638                  | 0.823154618                                | 0.669513562                 |
| 8.971889461                         | 0.197574661                   | -0.015112231                  | 0.645769402                                | 0.714165575                 |
| 18.9209869                          | 0.243411313                   | -0.022639436                  | 0.603929929                                | 0.730419983                 |
| 4.766602165                         | 0.278628703                   | -0.026989649                  | 0.766996821                                | 0.672789106                 |
| 9.111590462                         | 0.283214483                   | -0.022975509                  | 0.916914466                                | 0.643280714                 |
| 6.807066661                         | 0.276740608                   | -0.020825589                  | 1.054605588                                | 0.59837316                  |
| 8.907924136                         | 0.246440317                   | -0.019491543                  | 0.781536713                                | 0.67688207                  |
| 6.799302704                         | 0.247956095                   | -0.018429806                  | 0.835394915                                | 0.654486576                 |
| 8.942187814                         | 0.273498269                   | -0.021968114                  | 0.922092593                                | 0.641277942                 |
| 6.89408818                          | 0.229517707                   | -0.018380121                  | 0.738089524                                | 0.688167088                 |
| 6.830240295                         | 0.245401975                   | -0.020434161                  | 0.718725628                                | 0.691779793                 |
| 6.866253991                         | 0.228274142                   | -0.019252837                  | 0.660693034                                | 0.714924973                 |
| 6.845532149                         | 0.186723369                   | -0.013429165                  | 0.629718365                                | 0.720724164                 |
| 9.058401569                         | 0.230928252                   | -0.016384887                  | 0.804024126                                | 0.670806784                 |
| 8.849483092                         | 0.304767594                   | -0.024087186                  | 1.067863241                                | 0.601238581                 |
| 6.852362793                         | 0.238090642                   | -0.0179682                    | 0.797066718                                | 0.670193507                 |
| 6.737398661                         | 0.269834622                   | -0.023680622                  | 0.840394689                                | 0.658874168                 |
| 8.782995545                         | 0.241088421                   | -0.02115073                   | 0.75890407                                 | 0.684584153                 |
| 6.838652591                         | 0.241834335                   | -0.018634751                  | 0.808112822                                | 0.673192798                 |
| 8.649288818                         | 0.308186826                   | -0.028302599                  | 0.925784897                                | 0.638918826                 |
| 8.964494571                         | 0.248298088                   | -0.014639425                  | 1.209481901                                | 0.57298165                  |
| 19.08654143                         | 0.29259034                    | -0.021348125                  | 1.143628731                                | 0.59570827                  |
| 7.063250374                         | 0.396845515                   | -0.056153075                  | 0.749097831                                | 0.683580605                 |
| 6.92250267                          | 0.231958214                   | -0.019724739                  | 0.702061867                                | 0.698332656                 |
| 10.96466055                         | 0.19760771                    | -0.014727259                  | 0.643115528                                | 0.716000485                 |
| 6.831291228                         | 0.228758845                   | -0.017577779                  | 0.723232678                                | 0.689679796                 |
| 8.833656526                         | 0.244338508                   | -0.017765259                  | 0.884363071                                | 0.643835151                 |
| 7.067709224                         | 0.468213289                   | -0.079399754                  | 0.817987124                                | 0.655173164                 |
| 8.68085955                          | 0.547557223                   | -0.094484868                  | 1.144078773                                | 0.596922822                 |
| 12.96016606                         | 0.230163501                   | -0.016055442                  | 0.830958706                                | 0.663807979                 |
| 10.70825436                         | 0.321452041                   | -0.027478281                  | 1.040235717                                | 0.614160292                 |
| 8.891108002                         | 0.27736926                    | -0.022390336                  | 0.880340173                                | 0.6492267                   |
| 8.917689009                         | 0.237888887                   | -0.018269982                  | 0.757417028                                | 0.685571857                 |
| 8.903805636                         | 0.184077677                   | -0.012391833                  | 0.679502477                                | 0.70573954                  |
| 8.775467743                         | 0.459724585                   | -0.052339767                  | 1.284062968                                | 1.562617113                 |
| 11.09479591                         | 0.310806681                   | -0.031043282                  | 0.777711495                                | 0.680892008                 |
| 6.974386125                         | 0.450967493                   | -0.064675864                  | 0.934858154                                | 0.628983301                 |
| 7.049391186                         | 0.306154524                   | -0.03363732                   | 0.672100621                                | 0.703834416                 |
| 6.866026516                         | 0.32203784                    | -0.031856579                  | 0.835002942                                | 0.664167171                 |

| log.sigma.0.5.mm.3D_glcm_ClusterTendency | log.sigma.0.5.mm.3D_firstorder_InterquartileRange | log.sigma.0.5.mm.3D_firstorder_Skewness | log.sigma.0.5.mm.3D_firstorder_Uniformity |
|------------------------------------------|---------------------------------------------------|-----------------------------------------|-------------------------------------------|
| 1.859558729                              | 30.00631046                                       | 0.238609843                             | 0.302430001                               |
| 1.26953727                               | 13.05400038                                       | 0.307576917                             | 0.384433077                               |
| 1.85538826                               | 24.88069963                                       | 0.892288474                             | 0.327029667                               |
| 2.438710375                              | 29.44358778                                       | 0.234711586                             | 0.280105427                               |
| 1.065143256                              | 22.38276243                                       | -0.020286147                            | 0.41515041                                |
| 1.175558441                              | 23.04025602                                       | -0.040852229                            | 0.37586498                                |
| 1.198181485                              | 14.97912025                                       | -0.957523294                            | 0.419084433                               |
| 1.941694043                              | 31.68336344                                       | -0.084394816                            | 0.300429082                               |
| 1.633605607                              | 26.71618223                                       | 0.036774551                             | 0.332447219                               |
| 1.427919607                              | 19.99123025                                       | 0.34469221                              | 0.363820595                               |
| 1.014775838                              | 22.79398251                                       | -0.068726052                            | 0.397586592                               |
| 1.88922397                               | 23.94654369                                       | -0.011097034                            | 0.318331904                               |
| 1.059305952                              | 20.44040442                                       | 0.262548906                             | 0.40007802                                |
| 0.999026271                              | 20.04032898                                       | 0.123268046                             | 0.413169121                               |
| 1.302390168                              | 23.87397003                                       | -0.17784517                             | 0.366872269                               |
| 0.902860261                              | 5.974271178                                       | 1.001789075                             | 0.444399533                               |
| 1.158207206                              | 23.78325891                                       | 0.061638026                             | 0.380477172                               |
| 1.077628338                              | 18.27718067                                       | 0.318104444                             | 0.405411399                               |
| 1.466462433                              | 25.21041989                                       | -0.137020239                            | 0.348082805                               |
| 0.829392722                              | 11.04817104                                       | 0.220924191                             | 0.448379289                               |
| 1.103837311                              | 15.50840867                                       | 0.49621069                              | 0.402382235                               |
| 1.269734369                              | 22.61740232                                       | 0.388459834                             | 0.372457409                               |
| 0.895512312                              | 17.52665567                                       | 0.356224612                             | 0.441309693                               |
| 1.698407232                              | 26.5413475                                        | -0.17514986                             | 0.326446549                               |
| 1.005786838                              | 17.75772011                                       | 0.672828596                             | 0.416043973                               |
| 1.442296892                              | 22.69755507                                       | -0.018284749                            | 0.339688063                               |
| 1.051849912                              | 13.2106446                                        | 0.179285297                             | 0.407935766                               |
| 1.308165274                              | 17.35031462                                       | 0.594422053                             | 0.388117492                               |
| 1.641607353                              | 26.95852184                                       | -0.082527906                            | 0.330537602                               |
| 1.126318318                              | 12.68180364                                       | 0.539620711                             | 0.402067918                               |
| 1.118436151                              | 15.94250488                                       | 0.755108623                             | 0.411452813                               |
| 0.815321716                              | 13.42618108                                       | 0.541127889                             | 0.453508299                               |
| 1.947619191                              | 27.20463753                                       | 0.096944629                             | 0.305721701                               |
| 2.181757623                              | 23.74924874                                       | -0.226933382                            | 0.337093195                               |
| 2.03280985                               | 32.88648868                                       | -0.230111647                            | 0.285146611                               |
| 1.258844828                              | 22.18504596                                       | -0.075655825                            | 0.372411528                               |
| 1.757869655                              | 22.59836245                                       | 0.474494751                             | 0.335465856                               |
| 1.448772517                              | 23.42123866                                       | 0.014633906                             | 0.347073369                               |
| 0.975520944                              | 20.80901432                                       | -0.231540458                            | 0.413870702                               |
| 1.65791291                               | 27.61809158                                       | 0.087361058                             | 0.322854123                               |
| 1.466602397                              | 19.17250967                                       | 0.163504907                             | 0.343268854                               |
| 1.396484921                              | 24.40718651                                       | 0.01492684                              | 0.358755529                               |
| 1.486748442                              | 25.42468119                                       | -0.17433873                             | 0.346941803                               |
| 1.692549309                              | 25.33907127                                       | 0.046838184                             | 0.328150387                               |
| 1.575512917                              | 26.00336003                                       | -0.080602428                            | 0.338587263                               |
| 1.081014533                              | 18.25338721                                       | 0.517665199                             | 0.392554448                               |
| 1.953874026                              | 27.64339828                                       | -0.058904933                            | 0.30203548                                |
| 1.473911479                              | 26.83434916                                       | 0.047859326                             | 0.342738365                               |
| 1.52954314                               | 18.84204638                                       | -0.880802161                            | 0.420249499                               |
| 1.540233565                              | 25.02546024                                       | -0.362576482                            | 0.359667057                               |
| 1.282349431                              | 19.72358918                                       | 0.235498598                             | 0.370277631                               |
| 1.488553069                              | 26.25596333                                       | -0.141447609                            | 0.338808561                               |
| 1.428493111                              | 19.54944992                                       | 0.101892727                             | 0.355174688                               |
| 1.141216462                              | 20.82349491                                       | 0.110917755                             | 0.385440376                               |
| 1.147451783                              | 9.191750288                                       | 0.410817517                             | 0.403429824                               |
| 2.415015162                              | 33.66734123                                       | -0.092690962                            | 0.267926501                               |
| 2.119116297                              | 32.88012505                                       | 0.063409552                             | 0.284010456                               |
| 1.90584656                               | 23.29042816                                       | -0.505493913                            | 0.332908654                               |
| 1.441405752                              | 19.12567449                                       | 0.014816354                             | 0.346539973                               |
| 0.945952183                              | 19.15379047                                       | -0.219508452                            | 0.418094957                               |
| 1.508179778                              | 24.79474688                                       | 0.060088106                             | 0.340809828                               |
| 1.610139828                              | 21.9203949                                        | 0.348971692                             | 0.345985889                               |
| 0.97258934                               | 13.14432132                                       | 0.11279374                              | 0.421578743                               |
| 0.990914713                              | 9.337600946                                       | -2.196153459                            | 0.430941999                               |
| 1.307540141                              | 22.8060112                                        | 0.01156021                              | 0.359213404                               |
| 1.818755444                              | 22.24994278                                       | 0.180807313                             | 0.324771572                               |
| 1.948462833                              | 32.24158001                                       | -0.344067844                            | 0.295730372                               |
| 1.473935535                              | 22.98022652                                       | 0.026381978                             | 0.35389635                                |
| 1.411586518                              | 27.16109681                                       | -0.307902849                            | 0.339299001                               |
| 1.845445612                              | 23.95607042                                       | 0.239580809                             | 0.322400096                               |
| 1.279979369                              | 20.52642918                                       | 0.280676358                             | 0.375555532                               |
| 1.233747754                              | 22.74537373                                       | -0.059390869                            | 0.377595731                               |
| 1.102578218                              | 14.89491165                                       | 0.435963198                             | 0.410679272                               |
| 0.966542252                              | 12.94402874                                       | 0.41896087                              | 0.426413406                               |
| 1.416789354                              | 16.57671571                                       | 0.11851107                              | 0.363663287                               |
| 2.225267462                              | 32.70837831                                       | -0.181901938                            | 0.282354415                               |
| 1.373219311                              | 24.60926342                                       | 0.109272921                             | 0.354892125                               |
| 1.471115139                              | 29.68078351                                       | 0.0759179                               | 0.329174953                               |
| 1.324191747                              | 25.78036547                                       | -0.017088962                            | 0.360358467                               |
| 1.504022908                              | 23.57519388                                       | 0.342224259                             | 0.347583792                               |
| 1.810374209                              | 30.29232621                                       | -0.005323275                            | 0.301634543                               |
| 2.724095166                              | 39.51546288                                       | -0.189979038                            | 0.247074289                               |
| 2.637507787                              | 25.2647109                                        | -0.153188652                            | 0.282507687                               |
| 1.421326115                              | 20.04352856                                       | -0.477699536                            | 0.393198573                               |
| 1.173512156                              | 20.23705912                                       | 0.205365967                             | 0.385736056                               |
| 0.99418889                               | 14.58319581                                       | 0.498678056                             | 0.42475353                                |
| 1.215246955                              | 25.42429328                                       | 0.076948506                             | 0.368689739                               |
| 1.705322507                              | 27.81408334                                       | -0.29054581                             | 0.325619088                               |
| 1.2961778                                | 18.42946792                                       | -0.467621583                            | 0.349099704                               |
| 2.397073559                              | 20.83372211                                       | -1.189016895                            | 0.361088435                               |
| 1.527066357                              | 18.81710434                                       | -0.593461233                            | 0.355193861                               |
| 2.227530162                              | 31.5267446                                        | 0.286081357                             | 0.278426919                               |
| 1.525779576                              | 20.79229188                                       | 0.131846877                             | 0.333770551                               |
| 1.298053976                              | 18.91771579                                       | 0.270347224                             | 0.371360047                               |
| 1.093893822                              | 16.55948341                                       | 0.343265136                             | 0.402396454                               |
| 3.199730761                              | 40.52250862                                       | 0.140081282                             | 0.225577653                               |
| 1.505397522                              | 21.33374906                                       | -0.935903184                            | 0.371778155                               |
| 1.755138012                              | 25.11964178                                       | -0.405549503                            | 0.330689404                               |
| 1.128178397                              | 19.92245626                                       | -0.093055209                            | 0.420597183                               |
| 1.616949382                              | 18.09829712                                       | 0.830890458                             | 0.333634293                               |



| log.sigma.0.5.mm.3D_firstorder_MeanAbsoluteDeviation | log.sigma.0.5.mm.3D_firstorder_Energy | log.sigma.0.5.mm.3D_firstorder_RobustMeanAbsoluteDeviation | log.sigma.0.5.mm.3D_firstorder_Median |
|------------------------------------------------------|---------------------------------------|------------------------------------------------------------|---------------------------------------|
| 17.2185869                                           | 349846.5912                           | 11.68473904                                                | -0.860026866                          |
| 11.40564712                                          | 580079.8551                           | 6.285825434                                                | -0.639401138                          |
| 16.79455245                                          | 222205.0514                           | 10.49506258                                                | -3.249117136                          |
| 19.35301381                                          | 1727418.445                           | 12.51439199                                                | -0.242499709                          |
| 12.78999247                                          | 96960.18239                           | 8.800270811                                                | 2.261800528                           |
| 13.91735404                                          | 194766.9808                           | 9.761086181                                                | 0.047515232                           |
| 11.33527817                                          | 82765.82276                           | 6.807099882                                                | 1.659275174                           |
| 18.19301573                                          | 507534.9643                           | 12.97278515                                                | 0.561032653                           |
| 15.99588448                                          | 862100.7604                           | 10.96999482                                                | -0.804836595                          |
| 13.9029808                                           | 1145449.473                           | 8.491536695                                                | -1.796426356                          |
| 13.06633664                                          | 216385.8012                           | 9.321952701                                                | -0.635275006                          |
| 16.81296149                                          | 805441.2051                           | 10.34624242                                                | -1.62563616                           |
| 12.35005252                                          | 518736.1106                           | 8.433256227                                                | -0.115234088                          |
| 12.01128433                                          | 250756.9374                           | 8.425095315                                                | -0.329400912                          |
| 14.43190161                                          | 311409.0671                           | 9.884963339                                                | 1.048364282                           |
| 7.357116599                                          | 1049177.435                           | 3.198738379                                                | -0.498872727                          |
| 13.59402387                                          | 197747.2192                           | 9.706861816                                                | -0.091699049                          |
| 11.74597207                                          | 554614.63                             | 7.693382327                                                | -0.420343429                          |
| 15.00278631                                          | 203873.4203                           | 10.48671091                                                | 2.777632833                           |
| 8.691849369                                          | 428165.3749                           | 5.058150434                                                | -0.387313366                          |
| 11.7682859                                           | 1422749.088                           | 7.01554808                                                 | -1.769535244                          |
| 13.78197409                                          | 546676.7135                           | 9.303458247                                                | -0.122432876                          |
| 10.91120221                                          | 562618.6853                           | 7.153112743                                                | -1.637457728                          |
| 16.59371786                                          | 221968.1228                           | 11.09309475                                                | 2.735159397                           |
| 12.12550998                                          | 326198.9455                           | 7.703447509                                                | -2.979354143                          |
| 14.81508806                                          | 267204.2463                           | 9.693723532                                                | -1.59068507                           |
| 10.74519773                                          | 838948.3532                           | 6.106549621                                                | -0.97274211                           |
| 13.17660401                                          | 479793.7204                           | 7.911879853                                                | -2.910140276                          |
| 15.95367622                                          | 719293.4363                           | 11.02936377                                                | 1.091647863                           |
| 10.85697031                                          | 660925.9121                           | 5.971163373                                                | -1.185233831                          |
| 12.01917567                                          | 888352.9354                           | 7.28515479                                                 | -2.595018625                          |
| 9.108155818                                          | 904360.9583                           | 5.711162241                                                | -0.692706853                          |
| 17.04223192                                          | 1029037.513                           | 11.21889863                                                | 0.180970892                           |
| 17.262543                                            | 56128.25117                           | 10.53176402                                                | 4.400357723                           |
| 19.07983072                                          | 187400.4114                           | 13.38216989                                                | 3.648613691                           |
| 13.34484369                                          | 576873.6017                           | 9.195506027                                                | -0.39777191                           |
| 15.20569524                                          | 1272495.247                           | 9.31604928                                                 | -1.305360615                          |
| 14.84641554                                          | 1290506.002                           | 9.679320611                                                | -1.152303004                          |
| 12.42234112                                          | 201576.3258                           | 8.770378564                                                | 2.278425455                           |
| 16.22809087                                          | 462524.4985                           | 10.99711944                                                | -0.519415021                          |
| 13.79557054                                          | 541480.7339                           | 8.284006977                                                | -0.572138518                          |
| 14.8236437                                           | 330719.8717                           | 10.32996409                                                | -0.268647432                          |
| 15.13682816                                          | 595874.5967                           | 10.5377968                                                 | 0.354583398                           |
| 16.0225737                                           | 437525.1                              | 10.78075725                                                | 0.650548995                           |
| 15.8194433                                           | 765897.0297                           | 10.87167599                                                | 0.411753058                           |
| 12.30059754                                          | 612371.6928                           | 7.794458803                                                | -1.125423431                          |
| 17.6612039                                           | 2359671.988                           | 11.47955947                                                | -0.183096699                          |
| 15.77907795                                          | 227547.5545                           | 11.07504951                                                | -1.04622674                           |
| 12.86892511                                          | 40658.38045                           | 7.549691029                                                | 4.338979959                           |
| 15.45479421                                          | 192198.3401                           | 10.65156153                                                | 3.074907541                           |
| 13.03219758                                          | 1049907.118                           | 8.279758972                                                | -0.560903758                          |
| 15.20624414                                          | 295671.0867                           | 10.87462499                                                | -0.010174964                          |
| 13.40051667                                          | 1273575.406                           | 8.427434639                                                | -0.554328561                          |
| 12.93085119                                          | 163760.1449                           | 8.720074027                                                | 0.960980475                           |
| 9.621997941                                          | 1403593.321                           | 4.8499992                                                  | -0.464892358                          |
| 20.18311428                                          | 583292.4144                           | 13.74546863                                                | -0.008646803                          |
| 18.84722316                                          | 1211459.983                           | 13.37075706                                                | 0.229784176                           |
| 16.30009941                                          | 603661.3874                           | 10.41396945                                                | 3.314912081                           |
| 14.00103183                                          | 310831.4454                           | 8.409459757                                                | -0.256450221                          |
| 11.9314482                                           | 211674.9144                           | 8.105779258                                                | -1.672688484                          |
| 15.00085507                                          | 804621.3042                           | 10.05099729                                                | -1.252036333                          |
| 14.37731276                                          | 2122296.822                           | 8.930526884                                                | -0.604732305                          |
| 10.17845183                                          | 644604.8843                           | 5.971556964                                                | -0.596603662                          |
| 8.959277275                                          | 553987.7832                           | 4.792803272                                                | -0.205661312                          |
| 13.57185904                                          | 62673.02196                           | 9.361891933                                                | 0.017644167                           |
| 15.3396411                                           | 671018.3704                           | 9.608440709                                                | 0.722633362                           |
| 18.44974031                                          | 201474.3724                           | 13.35644403                                                | 1.474810243                           |
| 14.22821413                                          | 1120771.479                           | 9.410000247                                                | -0.54604423                           |
| 15.69846663                                          | 171316.9075                           | 11.05163856                                                | -0.263669699                          |
| 15.77345282                                          | 911033.869                            | 10.03382891                                                | -0.968011618                          |
| 13.38989758                                          | 938825.0869                           | 8.752386431                                                | -1.623731494                          |
| 13.4719379                                           | 333105.8702                           | 9.274109223                                                | -0.509844303                          |
| 10.95621717                                          | 1254951.021                           | 6.45552433                                                 | -0.864143342                          |
| 10.21253355                                          | 1419157.224                           | 5.992623677                                                | -1.282108843                          |
| 12.89162111                                          | 3102060.513                           | 7.458993373                                                | -0.058173245                          |
| 19.58695128                                          | 688198.4681                           | 13.58923511                                                | 1.152128279                           |
| 14.75467818                                          | 384486.1112                           | 10.32407839                                                | -0.754151583                          |
| 16.16741766                                          | 241422.7064                           | 11.72005846                                                | -1.762944102                          |
| 14.73418684                                          | 614913.9927                           | 10.27806122                                                | -2.026227236                          |
| 14.62601475                                          | 1084294.56                            | 9.50172049                                                 | -1.314074576                          |
| 18.10957223                                          | 274946.6277                           | 12.28274189                                                | -2.03085196                           |
| 22.25279412                                          | 1026457.074                           | 15.79530691                                                | 1.586394072                           |
| 18.238964                                            | 1808488.722                           | 11.12263794                                                | 0.697672427                           |
| 13.25385827                                          | 48408.66578                           | 8.040448526                                                | 3.046047449                           |
| 12.67358297                                          | 930906.5142                           | 8.366529234                                                | -1.09781754                           |
| 10.48909745                                          | 1227779.211                           | 6.275929661                                                | -0.749872684                          |
| 14.68992896                                          | 263445.4289                           | 10.37808641                                                | -1.554274797                          |
| 16.52405731                                          | 651226.2686                           | 11.7725582                                                 | 1.24481529                            |
| 12.7179604                                           | 53464.6625                            | 8.110095591                                                | 1.349030495                           |
| 17.770595                                            | 60645.16602                           | 10.34090754                                                | 3.197638273                           |
| 13.60856734                                          | 1458437.454                           | 8.29697503                                                 | 0.138707086                           |
| 19.50289171                                          | 476149.256                            | 12.67428222                                                | -2.196517825                          |
| 14.48258622                                          | 405666.4494                           | 8.945238502                                                | -0.777200758                          |
| 12.9682382                                           | 1312636.452                           | 8.035289665                                                | -0.784623951                          |
| 11.70227982                                          | 1515219.571                           | 7.158459684                                                | -1.242022872                          |
| 23.95760211                                          | 230710.7071                           | 16.54574727                                                | -2.875930786                          |
| 14.34588643                                          | 476747.5619                           | 9.082676533                                                | 2.374964714                           |
| 16.45372061                                          | 52154.1432                            | 11.29340581                                                | 5.380783081                           |
| 12.51373849                                          | 106388.8064                           | 8.21605463                                                 | 2.761484861                           |
| 14.93946818                                          | 361645.5662                           | 8.696097582                                                | -2.043223143                          |

| log.sigma.0.5.mm.3D_firstorder_TotalEnergy | log.sigma.0.5.mm.3D_firstorder_Maximum | log.sigma.0.5.mm.3D_firstorder_RootMeanSquared | log.sigma.0.5.mm.3D_firstorder_90Percentile | log.sigma.0.5.mm.3D_firstorder_Minimum |
|--------------------------------------------|----------------------------------------|------------------------------------------------|---------------------------------------------|----------------------------------------|
| 9445857.963                                | 81.13062286                            | 22.26057985                                    | 30.31360435                                 | -58.52385712                           |
| 15662156.09                                | 64.94612122                            | 16.71189289                                    | 21.72540054                                 | -71.88651276                           |
| 5999536.389                                | 85.23310852                            | 22.62726687                                    | 29.08291473                                 | -47.81594467                           |
| 46640298.02                                | 105.8319092                            | 25.6040382                                     | 34.22403336                                 | -101.5278244                           |
| 2617924.925                                | 64.31390381                            | 16.4342348                                     | 18.14422798                                 | -48.45856857                           |
| 5258708.483                                | 57.23005676                            | 17.40412443                                    | 19.99002876                                 | -66.29355621                           |
| 2234677.214                                | 43.56546021                            | 15.67150003                                    | 17.79631462                                 | -73.83895874                           |
| 13703444.04                                | 72.01486206                            | 22.50604187                                    | 28.24456463                                 | -83.6219635                            |
| 23276720.53                                | 72.64805603                            | 20.36346926                                    | 24.27232285                                 | -77.62229919                           |
| 30927135.76                                | 92.16703033                            | 19.22858213                                    | 23.75427647                                 | -88.96614075                           |
| 5842416.633                                | 47.91329575                            | 16.17564567                                    | 20.50438919                                 | -57.2791481                            |
| 21746912.54                                | 93.29656982                            | 23.31271315                                    | 30.14088917                                 | -119.4449844                           |
| 14005874.99                                | 83.28890991                            | 15.81498793                                    | 20.0570179                                  | -57.24197388                           |
| 6770437.31                                 | 47.1584816                             | 14.97633606                                    | 20.48619633                                 | -45.5357666                            |
| 8408044.811                                | 64.81364441                            | 18.48870267                                    | 23.06924057                                 | -73.94306946                           |
| 28327790.73                                | 94.11368561                            | 12.28926251                                    | 13.55495224                                 | -67.78105164                           |
| 5339174.919                                | 49.21616364                            | 16.8316806                                     | 20.55472202                                 | -40.98455048                           |
| 14974595.01                                | 64.13062286                            | 15.42166936                                    | 20.67466621                                 | -61.08520126                           |
| 5504582.347                                | 56.01098633                            | 18.7162489                                     | 25.13233318                                 | -53.88799286                           |
| 11560465.12                                | 52.30479431                            | 12.3637216                                     | 16.39935303                                 | -51.67661285                           |
| 38414225.38                                | 86.4174881                             | 16.50298762                                    | 21.80306702                                 | -72.05196381                           |
| 14760271.27                                | 90.24645996                            | 17.8279359                                     | 23.54006195                                 | -80.88961029                           |
| 15190704.5                                 | 53.3263588                             | 14.35311702                                    | 19.77529144                                 | -57.49433899                           |
| 5993139.315                                | 70.86416626                            | 21.48190375                                    | 27.38541412                                 | -72.506073                             |
| 8807371.529                                | 91.63431549                            | 16.45993186                                    | 20.39922047                                 | -49.4400177                            |
| 7214514.65                                 | 56.07378769                            | 19.62193996                                    | 24.28129883                                 | -71.80076599                           |
| 22651605.54                                | 66.01006317                            | 15.55798447                                    | 19.42000675                                 | -96.85905457                           |
| 12954430.45                                | 80.42755127                            | 18.29802365                                    | 23.21426506                                 | -76.29851532                           |
| 19420922.78                                | 62.28901672                            | 20.1874142                                     | 27.30957108                                 | -65.03394318                           |
| 17844999.63                                | 83.46396637                            | 16.12458762                                    | 17.89626904                                 | -69.84564972                           |
| 23985529.26                                | 93.37017059                            | 16.71658292                                    | 21.15522728                                 | -60.30437851                           |
| 24417745.88                                | 73.31259155                            | 12.34933455                                    | 16.67771378                                 | -46.8509903                            |
| 27784012.86                                | 103.9607925                            | 22.4981555                                     | 29.22166748                                 | -80.55606079                           |
| 1515462.781                                | 77.18039703                            | 23.23133063                                    | 24.69889164                                 | -62.39176559                           |
| 5059811.107                                | 62.01934433                            | 23.75834738                                    | 28.38111458                                 | -67.50418091                           |
| 15575587.25                                | 73.58194733                            | 16.89914172                                    | 21.42960644                                 | -68.72607422                           |
| 34357371.66                                | 93.83043671                            | 21.01995783                                    | 28.66396313                                 | -74.63368225                           |
| 34843662.06                                | 74.7700882                             | 19.61545946                                    | 26.93517151                                 | -124.2391968                           |
| 5442560.796                                | 49.11553955                            | 15.53733482                                    | 20.01034164                                 | -48.16469955                           |
| 12488161.46                                | 81.68490601                            | 20.99808195                                    | 25.8495079                                  | -85.06654358                           |
| 14619979.82                                | 63.9926033                             | 19.16649776                                    | 25.39045658                                 | -74.43384552                           |
| 8929436.535                                | 56.33895493                            | 18.62874917                                    | 22.66477966                                 | -62.87542725                           |
| 16088614.11                                | 63.69972992                            | 19.04981924                                    | 23.04997311                                 | -75.02350616                           |
| 11813177.7                                 | 81.44208527                            | 20.6604394                                     | 25.71263618                                 | -68.3532486                            |
| 20679219.8                                 | 85.46380615                            | 20.19469966                                    | 22.99078827                                 | -88.55526733                           |
| 16534035.71                                | 85.32654572                            | 16.57868043                                    | 21.95543518                                 | -53.78623199                           |
| 63711143.68                                | 98.300354                              | 23.51881267                                    | 30.19469452                                 | -125.3987122                           |
| 6143783.971                                | 64.73183441                            | 19.75612698                                    | 24.92877808                                 | -73.5885773                            |
| 1097776.272                                | 46.60812378                            | 17.41897671                                    | 17.63629875                                 | -51.7174263                            |
| 5189355.182                                | 64.86058044                            | 19.66512095                                    | 22.84902573                                 | -80.4817276                            |
| 28347492.19                                | 76.95682526                            | 17.5109038                                     | 21.94796295                                 | -77.76686859                           |
| 7983119.342                                | 72.61736298                            | 18.90826472                                    | 23.19141769                                 | -63.41841125                           |
| 34386535.95                                | 90.65126801                            | 18.25676448                                    | 23.77750587                                 | -114.5437775                           |
| 4421523.913                                | 56.29354858                            | 16.64601825                                    | 22.8760376                                  | -47.88760376                           |
| 37897019.66                                | 77.99381256                            | 14.66888005                                    | 18.55696487                                 | -63.66487122                           |
| 15748895.19                                | 78.56971741                            | 25.76017012                                    | 29.77038078                                 | -72.67342377                           |
| 32709419.54                                | 89.51168823                            | 23.5036451                                     | 29.97417641                                 | -87.49837494                           |
| 16298857.46                                | 62.80005646                            | 21.60714749                                    | 25.1143795                                  | -85.35222626                           |
| 8392449.027                                | 99.63430023                            | 19.54115689                                    | 23.2196394                                  | -74.568367                             |
| 5715222.69                                 | 44.40570068                            | 15.50053693                                    | 18.71219635                                 | -89.42987061                           |
| 21724775.21                                | 69.77724457                            | 19.48634042                                    | 25.07175713                                 | -93.5448761                            |
| 57302014.19                                | 96.03843689                            | 19.68303424                                    | 25.47161121                                 | -98.03502655                           |
| 17404331.88                                | 58.85342026                            | 14.44333739                                    | 20.14339943                                 | -85.71231079                           |
| 14957670.15                                | 56.68120956                            | 14.24259889                                    | 16.72921562                                 | -210.2838287                           |
| 1692171.593                                | 43.04096222                            | 16.99458059                                    | 20.26636581                                 | -41.81493378                           |
| 18117496                                   | 83.38166046                            | 20.78650515                                    | 28.40413551                                 | -76.23825836                           |
| 5439808.055                                | 50.8964653                             | 22.61318808                                    | 26.99607906                                 | -70.58345032                           |
| 30260829.92                                | 84.99375916                            | 18.72350785                                    | 24.25757751                                 | -97.55940247                           |
| 4625556.503                                | 50.78414536                            | 19.59894453                                    | 22.401124                                   | -73.62727356                           |
| 24597914.46                                | 100.4499741                            | 21.28439089                                    | 27.7990284                                  | -80.29840088                           |
| 25348277.35                                | 66.90291595                            | 17.57339016                                    | 24.08030968                                 | -72.54030609                           |
| 8993858.496                                | 66.3436203                             | 17.17687567                                    | 20.03075867                                 | -69.49563599                           |
| 33883677.57                                | 87.65601349                            | 15.58303821                                    | 20.11622162                                 | -73.95893097                           |
| 38317245.05                                | 115.7342758                            | 14.536502                                      | 18.106287                                   | -63.25128937                           |
| 83755633.85                                | 90.82828522                            | 18.38246688                                    | 22.87111702                                 | -93.57741547                           |
| 18581358.64                                | 109.573479                             | 24.8327464                                     | 28.40931702                                 | -89.59329224                           |
| 10381125                                   | 65.0719223                             | 18.55298279                                    | 21.9388237                                  | -64.36395264                           |
| 6518413.073                                | 59.46563339                            | 19.8940928                                     | 24.63182468                                 | -54.50226212                           |
| 16602677.8                                 | 60.0240593                             | 18.67058378                                    | 22.14605274                                 | -77.16628265                           |
| 29275953.12                                | 94.92162323                            | 19.51893832                                    | 24.3588295                                  | -65.04833984                           |
| 7423558.947                                | 67.11363983                            | 23.35656274                                    | 26.15377407                                 | -67.69189453                           |
| 27714341                                   | 95.59765625                            | 27.66661376                                    | 34.65264893                                 | -97.23490143                           |
| 48829195.49                                | 103.4457779                            | 25.45072717                                    | 32.57182236                                 | -200.8304901                           |
| 1307033.976                                | 44.07619476                            | 18.27164107                                    | 22.95656853                                 | -59.25199509                           |
| 25134475.88                                | 75.61521912                            | 16.56872691                                    | 22.52511215                                 | -65.34409332                           |
| 33150038.69                                | 105.4680939                            | 14.97367553                                    | 17.97528267                                 | -100.3467102                           |
| 7113026.58                                 | 57.47863007                            | 18.40159784                                    | 23.85190792                                 | -73.51063538                           |
| 17583109.25                                | 57.72363281                            | 20.48425138                                    | 24.30905952                                 | -86.07955933                           |
| 1443545.888                                | 38.71733856                            | 17.09258979                                    | 25.49455719                                 | -74.5050354                            |
| 1637419.482                                | 48.15541077                            | 24.03274869                                    | 21.64021568                                 | -80.07722473                           |
| 39377811.27                                | 75.74828339                            | 19.15469927                                    | 23.63285904                                 | -144.3312531                           |
| 12856029.91                                | 92.47563171                            | 25.96983585                                    | 32.94396591                                 | -103.9125748                           |
| 10952994.13                                | 79.0572052                             | 19.92320013                                    | 25.51657562                                 | -81.55809784                           |
| 35441184.21                                | 97.90415192                            | 17.91474275                                    | 21.99871426                                 | -80.59906769                           |
| 40910928.41                                | 105.659729                             | 16.15471385                                    | 21.0860281                                  | -89.76885223                           |
| 6229189.09                                 | 81.97799683                            | 30.19768249                                    | 37.51422882                                 | -83.36745453                           |
| 12872184.17                                | 83.26795959                            | 19.80055908                                    | 22.42246437                                 | -105.119957                            |
| 1408161.866                                | 43.12979507                            | 20.59168338                                    | 27.29309082                                 | -63.62779617                           |
| 2872497.773                                | 65.90842368                            | 16.75438008                                    | 19.93877563                                 | -55.05989838                           |
| 9764430.288                                | 89.42459869                            | 21.16921751                                    | 26.50758858                                 | -61.17582321                           |

| log.sigma.0.5.mm.3D_firstorder_Entropy | log.sigma.0.5.mm.3D_firstorder_StandardDeviation | log.sigma.0.5.mm.3D_firstorder_Range | log.sigma.0.5.mm.3D_firstorder_Variance | log.sigma.0.5.mm.3D_firstorder_10Percentile |
|----------------------------------------|--------------------------------------------------|--------------------------------------|-----------------------------------------|---------------------------------------------|
| 1.954095041                            | 22.26053495                                      | 139.65448                            | 495.5314163                             | -27.06592178                                |
| 1.62891482                             | 16.71185753                                      | 136.832634                           | 279.286182                              | -19.46140213                                |
| 1.90623886                             | 22.62723538                                      | 133.0490532                          | 511.9917809                             | -26.27025719                                |
| 2.116923191                            | 25.5658417                                       | 207.3597336                          | 653.612262                              | -29.30871391                                |
| 1.49673086                             | 16.42016737                                      | 112.7724724                          | 269.6218963                             | -20.42662163                                |
| 1.630727303                            | 17.36491976                                      | 123.523613                           | 301.5404381                             | -23.75305824                                |
| 1.498907913                            | 15.66807711                                      | 117.4044189                          | 245.4886404                             | -18.17741356                                |
| 1.952209465                            | 22.50583711                                      | 155.6368256                          | 506.5127041                             | -29.65803108                                |
| 1.832142906                            | 20.3461712                                       | 150.2703552                          | 413.9666824                             | -26.60556755                                |
| 1.751256194                            | 19.2197873                                       | 181.1331711                          | 369.400224                              | -22.04063263                                |
| 1.530182264                            | 16.14793362                                      | 105.1924438                          | 260.7557603                             | -21.39930573                                |
| 1.969788867                            | 23.30822707                                      | 212.7415543                          | 543.2734489                             | -26.12748108                                |
| 1.536143639                            | 15.79708696                                      | 140.5308838                          | 249.5479565                             | -18.27594433                                |
| 1.456378438                            | 14.96611537                                      | 92.6942482                           | 223.9846093                             | -17.64897671                                |
| 1.684836254                            | 18.46964284                                      | 138.7567139                          | 341.1277066                             | -21.52389336                                |
| 1.373056376                            | 12.28748301                                      | 154.8947372                          | 150.9822388                             | -11.58536739                                |
| 1.580582484                            | 16.82770349                                      | 90.20071411                          | 283.1716048                             | -22.56227837                                |
| 1.511849389                            | 15.41693542                                      | 125.2158241                          | 237.6818977                             | -18.41071987                                |
| 1.727880697                            | 18.67675963                                      | 109.8989792                          | 348.8213503                             | -23.58110046                                |
| 1.324553506                            | 12.36151207                                      | 103.9814072                          | 152.8069806                             | -14.45614815                                |
| 1.582751121                            | 16.48287266                                      | 158.4694519                          | 271.6850913                             | -19.62281399                                |
| 1.665587578                            | 17.7977462                                       | 171.1360703                          | 316.7597698                             | -19.69875546                                |
| 1.393671544                            | 14.34985682                                      | 110.8206978                          | 205.9183908                             | -17.32282257                                |
| 1.868571843                            | 21.46037966                                      | 143.3702393                          | 460.5478953                             | -26.90705109                                |
| 1.536681781                            | 16.35726029                                      | 141.0743332                          | 267.5599642                             | -20.65033817                                |
| 1.816679787                            | 19.5937608                                       | 127.8745537                          | 383.9154621                             | -25.35078945                                |
| 1.535473433                            | 15.55658047                                      | 162.8691177                          | 242.007196                              | -17.77392673                                |
| 1.6785863                              | 18.25147499                                      | 156.7260666                          | 333.1163394                             | -21.8718544                                 |
| 1.810730314                            | 20.13908811                                      | 127.3229599                          | 405.5828697                             | -23.59007759                                |
| 1.580343955                            | 16.07567201                                      | 153.3096161                          | 258.4272306                             | -19.89382534                                |
| 1.565026484                            | 16.67872521                                      | 153.6745491                          | 278.1798746                             | -20.3329834                                 |
| 1.300442984                            | 12.33335051                                      | 120.1635818                          | 152.1115349                             | -13.58463364                                |
| 1.966216524                            | 22.4912188                                       | 184.5168533                          | 505.8549232                             | -27.49824944                                |
| 1.929835985                            | 23.18225378                                      | 139.5721626                          | 537.4168902                             | -31.0866457                                 |
| 2.033552383                            | 23.73407716                                      | 129.5235252                          | 563.3064187                             | -28.86806183                                |
| 1.631599446                            | 16.89696839                                      | 142.3802115                          | 285.5075409                             | -22.29402142                                |
| 1.861005794                            | 21.01897952                                      | 168.464119                           | 441.7974999                             | -24.95297031                                |
| 1.774219237                            | 19.61334849                                      | 199.009285                           | 384.6834392                             | -22.62278328                                |
| 1.46611631                             | 15.50092878                                      | 97.28023911                          | 240.278793                              | -19.20895805                                |
| 1.876909668                            | 20.99661352                                      | 166.7514496                          | 440.8577795                             | -26.445858                                  |
| 1.791496862                            | 19.1658537                                       | 138.4264488                          | 367.329948                              | -23.38226204                                |
| 1.708188828                            | 18.62256632                                      | 119.2143822                          | 346.7999764                             | -24.09572029                                |
| 1.745948265                            | 19.04266381                                      | 138.7232361                          | 362.6230448                             | -26.20301418                                |
| 1.857943244                            | 20.65820452                                      | 149.7953339                          | 426.7614142                             | -26.06617661                                |
| 1.817585232                            | 20.18095909                                      | 174.0190735                          | 407.27111                               | -27.09847851                                |
| 1.587524613                            | 16.57867879                                      | 139.1127777                          | 274.8525906                             | -19.58551579                                |
| 2.00907406                             | 23.50643957                                      | 223.6990662                          | 552.5527014                             | -27.06815052                                |
| 1.79570203                             | 19.74033818                                      | 138.4906221                          | 389.6809516                             | -24.39582863                                |
| 1.554201134                            | 17.41314507                                      | 98.32555008                          | 303.2176213                             | -23.88741531                                |
| 1.744653337                            | 19.65761019                                      | 145.342308                           | 386.4216382                             | -28.07688446                                |
| 1.670898797                            | 17.51089461                                      | 154.7236938                          | 306.6314302                             | -21.92506161                                |
| 1.752599182                            | 18.86928633                                      | 136.0357742                          | 356.0499667                             | -26.65694809                                |
| 1.735201456                            | 18.25675169                                      | 205.1905405                          | 333.3089822                             | -22.94212151                                |
| 1.586626741                            | 16.62949436                                      | 104.1811523                          | 276.5400827                             | -20.42740059                                |
| 1.529165859                            | 14.66455965                                      | 141.6586838                          | 215.0493099                             | -16.02021179                                |
| 2.130193707                            | 25.75078276                                      | 151.2431412                          | 663.1028129                             | -35.19486389                                |
| 2.028391765                            | 23.50281416                                      | 177.0100632                          | 552.3822736                             | -29.72616768                                |
| 1.883566066                            | 21.59342602                                      | 148.1522827                          | 466.2760472                             | -29.69845047                                |
| 1.786140479                            | 19.53539969                                      | 174.2026672                          | 381.6318411                             | -24.01250858                                |
| 1.47174569                             | 15.49928355                                      | 133.8355713                          | 240.2277905                             | -17.83544731                                |
| 1.792217679                            | 19.4796467                                       | 163.3221207                          | 379.4566354                             | -24.51717567                                |
| 1.797750597                            | 19.67858742                                      | 194.0734634                          | 387.2468028                             | -23.48541851                                |
| 1.457660904                            | 14.41746565                                      | 144.565731                           | 207.8633158                             | -15.08846331                                |
| 1.411769532                            | 14.24184744                                      | 266.9650383                          | 202.8302186                             | -15.93081474                                |
| 1.655945152                            | 16.99453955                                      | 84.855896                            | 288.8143745                             | -22.47249069                                |
| 1.877714764                            | 20.7198418                                       | 159.6199188                          | 429.311844                              | -22.81855469                                |
| 1.949461259                            | 22.59628959                                      | 121.4799156                          | 510.5923034                             | -31.75435066                                |
| 1.739717739                            | 18.73244802                                      | 182.5531616                          | 350.5675059                             | -23.12419167                                |
| 1.768345969                            | 19.5646866                                       | 124.4114189                          | 382.7769617                             | -27.79995346                                |
| 1.906052844                            | 21.28376806                                      | 180.7483749                          | 452.9987829                             | -25.23385048                                |
| 1.648072437                            | 17.57158986                                      | 139.4432222                          | 308.76077                               | -20.83634911                                |
| 1.629602778                            | 17.15876154                                      | 135.8392563                          | 294.4230975                             | -23.01161156                                |
| 1.533017312                            | 15.58291897                                      | 161.6149445                          | 242.8273636                             | -17.77792587                                |
| 1.455673536                            | 14.51723203                                      | 178.9855652                          | 210.7500257                             | -17.70372391                                |
| 1.733388851                            | 18.37263807                                      | 184.4057007                          | 337.5538295                             | -20.60174122                                |
| 2.065937693                            | 24.82212816                                      | 199.1686401                          | 616.1380466                             | -32.66645622                                |
| 1.724083114                            | 18.53398901                                      | 129.4358749                          | 343.5087484                             | -24.50073433                                |
| 1.796275241                            | 19.83623955                                      | 113.9678955                          | 393.4763997                             | -26.94030209                                |
| 1.7089895                              | 18.61014156                                      | 137.1903419                          | 346.3373689                             | -24.27852688                                |
| 1.783694976                            | 19.51046845                                      | 159.9699631                          | 380.6583791                             | -24.89599419                                |
| 1.983887768                            | 23.26800369                                      | 154.8055344                          | 541.3999959                             | -29.75456829                                |
| 2.232555035                            | 27.65981296                                      | 192.8325577                          | 765.065253                              | -35.25646973                                |
| 2.115239148                            | 25.40666609                                      | 304.276268                           | 645.498682                              | -29.22593403                                |
| 1.618642784                            | 18.13083029                                      | 103.3218189                          | 328.7270069                             | -21.03141632                                |
| 1.59466775                             | 16.56536553                                      | 140.9593124                          | 274.4113352                             | -19.20063972                                |
| 1.462750228                            | 14.97364424                                      | 205.8148041                          | 224.2100217                             | -16.22936916                                |
| 1.662938666                            | 18.39482248                                      | 130.9892654                          | 338.3694942                             | -22.65792599                                |
| 1.829642462                            | 20.47944761                                      | 143.8031921                          | 419.4077745                             | -28.63528919                                |
| 1.720106076                            | 17.01656333                                      | 113.222374                           | 289.5634276                             | -20.50022812                                |
| 1.875386674                            | 23.90902623                                      | 128.2326355                          | 571.6415353                             | -30.76960144                                |
| 1.760319297                            | 19.15441112                                      | 220.0795364                          | 366.8914652                             | -22.54400673                                |
| 2.131729406                            | 25.93739933                                      | 196.3882065                          | 672.7486842                             | -30.76359367                                |
| 1.841569061                            | 19.91930226                                      | 160.615303                           | 396.7786027                             | -25.64975147                                |
| 1.691132389                            | 17.91290099                                      | 178.5032196                          | 320.8720218                             | -21.68829937                                |
| 1.560515454                            | 16.15443977                                      | 195.4285812                          | 260.9659243                             | -18.05870724                                |
| 2.368117775                            | 30.16792547                                      | 165.3454514                          | 910.1037273                             | -36.74106674                                |
| 1.731663919                            | 19.78634088                                      | 188.3879166                          | 391.4992854                             | -22.34192181                                |
| 1.796940068                            | 20.51215331                                      | 106.7575912                          | 420.7484334                             | -23.61224518                                |
| 1.518278633                            | 16.6545246                                       | 120.9683228                          | 277.3731898                             | -18.38662605                                |
| 1.875053738                            | 21.15944852                                      | 150.6004219                          | 447.7222616                             | -25.06129189                                |

| log.sigma.0.5.mm.3D_firstorder_Kurtosis | log.sigma.0.5.mm.3D_firstorder_Mean | log.sigma.0.5.mm.3D_glrIm_ShortRunLowGrayLevelEmphasis | log.sigma.0.5.mm.3D_glrIm_GrayLevelVariance |
|-----------------------------------------|-------------------------------------|--------------------------------------------------------|---------------------------------------------|
| 3.067530909                             | 0.044710603                         | 0.09239004                                             | 1.03594508                                  |
| 4.766822333                             | -0.034380248                        | 0.076957692                                            | 0.690330528                                 |
| 4.369533143                             | -0.037751351                        | 0.232168929                                            | 1.137127069                                 |
| 3.813326287                             | 1.398038034                         | 0.031080766                                            | 1.314710787                                 |
| 3.911307774                             | 0.67983614                          | 0.179604587                                            | 0.580395279                                 |
| 3.128624212                             | -1.167522619                        | 0.08074042                                             | 0.684580916                                 |
| 5.301518699                             | -0.327525325                        | 0.093094823                                            | 0.595258071                                 |
| 2.966974835                             | -0.096002147                        | 0.048428952                                            | 1.023898117                                 |
| 3.355164261                             | -0.839165079                        | 0.046838287                                            | 0.897677122                                 |
| 4.904042928                             | -0.581503845                        | 0.044695053                                            | 0.855467947                                 |
| 2.876482191                             | -0.946442134                        | 0.077723904                                            | 0.58790835                                  |
| 4.937870284                             | -0.4573244                          | 0.031834512                                            | 1.176456182                                 |
| 4.007503148                             | 0.752254328                         | 0.071849433                                            | 0.601918812                                 |
| 2.923966867                             | 0.553201908                         | 0.165231624                                            | 0.533637528                                 |
| 3.783771387                             | 0.839297121                         | 0.084409825                                            | 0.719451602                                 |
| 9.405850243                             | 0.209127228                         | 0.067709781                                            | 0.475967873                                 |
| 2.701064646                             | -0.365878253                        | 0.2003173                                              | 0.638763096                                 |
| 3.654039143                             | 0.382084059                         | 0.06766173                                             | 0.581631119                                 |
| 2.826011095                             | 1.215163631                         | 0.076173867                                            | 0.76538341                                  |
| 4.447326433                             | 0.23373337                          | 0.063254248                                            | 0.433358272                                 |
| 4.386878109                             | -0.814560672                        | 0.074213889                                            | 0.68128014                                  |
| 3.973587383                             | 1.037077017                         | 0.041068263                                            | 0.72171809                                  |
| 3.405035832                             | -0.305904265                        | 0.065073929                                            | 0.509221296                                 |
| 3.399801053                             | 0.961401794                         | 0.095566627                                            | 0.938609955                                 |
| 4.808517238                             | -1.835590506                        | 0.18509149                                             | 0.652721825                                 |
| 3.654103109                             | -1.051221035                        | 0.093167134                                            | 0.902268514                                 |
| 5.875955598                             | -0.209009437                        | 0.040656986                                            | 0.619001472                                 |
| 4.601091329                             | -1.30435044                         | 0.042928779                                            | 0.804790791                                 |
| 3.029919342                             | 1.396002229                         | 0.085436421                                            | 0.844002011                                 |
| 5.445527209                             | -1.255027948                        | 0.075606412                                            | 0.675381262                                 |
| 5.142980983                             | -1.124397589                        | 0.072968313                                            | 0.685214105                                 |
| 4.675170672                             | 0.628115387                         | 0.141794412                                            | 0.419959279                                 |
| 3.867641981                             | 0.558639349                         | 0.049163714                                            | 1.068033634                                 |
| 3.932877632                             | 1.509249016                         | 0.110235389                                            | 1.095220748                                 |
| 2.85606188                              | 1.073616135                         | 0.109665423                                            | 1.144657457                                 |
| 3.154452796                             | -0.271016724                        | 0.078940675                                            | 0.67826726                                  |
| 3.911883341                             | -0.202799137                        | 0.087196193                                            | 0.970930781                                 |
| 3.908615644                             | 0.287768499                         | 0.028248544                                            | 0.839732925                                 |
| 2.995993446                             | 1.063005367                         | 0.175236492                                            | 0.533458095                                 |
| 3.649756332                             | -0.248326783                        | 0.048001235                                            | 0.959278212                                 |
| 3.966830795                             | -0.157125046                        | 0.086999718                                            | 0.852266738                                 |
| 3.096559445                             | -0.479915796                        | 0.082146308                                            | 0.76055418                                  |
| 3.018191716                             | -0.522080749                        | 0.045730502                                            | 0.784804797                                 |
| 3.467893761                             | 0.303878199                         | 0.090451688                                            | 0.923472204                                 |
| 3.660185213                             | -0.744838536                        | 0.048374579                                            | 0.88545986                                  |
| 4.130509909                             | -0.007370871                        | 0.073377511                                            | 0.651117582                                 |
| 4.37629356                              | 0.762789695                         | 0.021174245                                            | 1.160134042                                 |
| 3.284101789                             | -0.789684432                        | 0.090706519                                            | 0.864956082                                 |
| 4.164421682                             | 0.450697627                         | 0.096201915                                            | 0.670818847                                 |
| 3.463474253                             | 0.543455452                         | 0.048531848                                            | 0.8161524                                   |
| 3.974792035                             | -0.017933                           | 0.042811309                                            | 0.714128276                                 |
| 2.920701485                             | -1.213469475                        | 0.088342081                                            | 0.793808066                                 |
| 4.305394482                             | -0.021612528                        | 0.027946507                                            | 0.783727948                                 |
| 3.278831823                             | 0.741512638                         | 0.179753108                                            | 0.621347608                                 |
| 5.381349291                             | 0.355994327                         | 0.073802134                                            | 0.560886439                                 |
| 3.04083567                              | -0.695378758                        | 0.120979877                                            | 1.304054585                                 |
| 3.026232977                             | 0.197634423                         | 0.048452054                                            | 1.132428687                                 |
| 3.722176609                             | 0.769919021                         | 0.050426999                                            | 0.98480357                                  |
| 4.915121445                             | -0.474311545                        | 0.094593182                                            | 0.861640159                                 |
| 5.061060434                             | -0.197115952                        | 0.041513853                                            | 0.581839424                                 |
| 3.568067086                             | -0.510712911                        | 0.045195639                                            | 0.854065019                                 |
| 4.47510102                              | 0.418370629                         | 0.045595584                                            | 0.871540006                                 |
| 5.335589179                             | 0.864105978                         | 0.040342787                                            | 0.540474807                                 |
| 30.81458625                             | -0.146303335                        | 0.008676348                                            | 0.565201916                                 |
| 2.803230536                             | 0.037348871                         | 0.205499235                                            | 0.670193871                                 |
| 3.9537719                               | 1.663415798                         | 0.045144167                                            | 0.919579011                                 |
| 2.656521371                             | -0.874054772                        | 0.107615486                                            | 1.011143695                                 |
| 3.880738664                             | 0.047331668                         | 0.043896387                                            | 0.784904138                                 |
| 3.068809089                             | -1.158302615                        | 0.091265522                                            | 0.808311163                                 |
| 4.081500338                             | 0.162826616                         | 0.047507933                                            | 0.991419215                                 |
| 3.517390693                             | -0.251538652                        | 0.075776548                                            | 0.704303141                                 |
| 3.442140153                             | -0.78864458                         | 0.078826232                                            | 0.680712146                                 |
| 4.913043933                             | -0.060961429                        | 0.072877679                                            | 0.617640739                                 |
| 5.453631602                             | -0.748241039                        | 0.070564326                                            | 0.546015042                                 |
| 5.150183702                             | 0.601048321                         | 0.045403131                                            | 0.801466434                                 |
| 3.524136838                             | -0.726118032                        | 0.057390378                                            | 1.208355896                                 |
| 3.280320738                             | -0.839298418                        | 0.082829619                                            | 0.77067825                                  |
| 2.605161256                             | -1.516089988                        | 0.086486037                                            | 0.841836854                                 |
| 3.210730583                             | -1.501109566                        | 0.044839352                                            | 0.785812021                                 |
| 3.975861099                             | -0.574955532                        | 0.086218386                                            | 0.874727739                                 |
| 3.520546357                             | -2.032008008                        | 0.051953152                                            | 1.113783906                                 |
| 3.046648441                             | 0.61340345                          | 0.060463177                                            | 1.454868478                                 |
| 5.67532148                              | 1.496940754                         | 0.010033251                                            | 1.297600006                                 |
| 4.010318871                             | 2.264036348                         | 0.086106567                                            | 0.700496482                                 |
| 3.579974357                             | 0.333730619                         | 0.074294255                                            | 0.646680703                                 |
| 7.136948833                             | 0.030612747                         | 0.025128011                                            | 0.578581138                                 |
| 3.190472886                             | -0.499308555                        | 0.079006203                                            | 0.713871989                                 |
| 2.893706955                             | -0.443598967                        | 0.048269219                                            | 0.879986497                                 |
| 4.448134562                             | 1.610340974                         | 0.081153813                                            | 0.728735936                                 |
| 4.656687343                             | -2.43546185                         | 0.086142778                                            | 1.274773787                                 |
| 6.509402701                             | 0.10506697                          | 0.020670238                                            | 0.84661573                                  |
| 4.027673218                             | -1.297570682                        | 0.033805363                                            | 1.38412704                                  |
| 4.10781247                              | -0.394082213                        | 0.047810893                                            | 0.90855149                                  |
| 4.973975321                             | -0.256877457                        | 0.043860802                                            | 0.770154391                                 |
| 5.119523615                             | 0.09410295                          | 0.040178577                                            | 0.651251226                                 |
| 2.933658417                             | -1.340261392                        | 0.063727284                                            | 1.764748469                                 |
| 6.770908134                             | 0.750236208                         | 0.030539953                                            | 0.8832522                                   |
| 3.055325175                             | 1.80803512                          | 0.085480837                                            | 0.795516358                                 |
| 4.529080005                             | 1.826488982                         | 0.080489279                                            | 0.628476658                                 |
| 4.991124484                             | -0.643045986                        | 0.086204238                                            | 1.033597014                                 |

| log.sigma.0.5.mm.3D_glrIm_LowGrayLevelRunEmphasis | log.sigma.0.5.mm.3D_glrIm_GrayLevelNonUniformityNormalized | log.sigma.0.5.mm.3D_glrIm_RunVariance | log.sigma.0.5.mm.3D_glrIm_GrayLevelNonUniformity |
|---------------------------------------------------|------------------------------------------------------------|---------------------------------------|--------------------------------------------------|
| 0.111038048                                       | 0.272790789                                                | 0.552620313                           | 143.4197826                                      |
| 0.100804985                                       | 0.347941141                                                | 0.87270347                            | 483.1437381                                      |
| 0.276683367                                       | 0.276218406                                                | 0.651194318                           | 88.57964319                                      |
| 0.037557832                                       | 0.253607384                                                | 0.511493242                           | 505.4758552                                      |
| 0.2263376                                         | 0.382946041                                                | 0.724156985                           | 92.9791879                                       |
| 0.102646351                                       | 0.341792573                                                | 0.735361941                           | 150.9621655                                      |
| 0.112343543                                       | 0.382778914                                                | 0.623088004                           | 92.02490035                                      |
| 0.05935642                                        | 0.275172709                                                | 0.633836667                           | 201.0847096                                      |
| 0.05926268                                        | 0.298501632                                                | 0.711124018                           | 434.6886317                                      |
| 0.057799264                                       | 0.317654914                                                | 0.801866405                           | 677.3129441                                      |
| 0.100558659                                       | 0.364869873                                                | 0.867250396                           | 204.0009528                                      |
| 0.039240066                                       | 0.277313267                                                | 0.66087577                            | 297.2591609                                      |
| 0.09518742                                        | 0.366119013                                                | 0.945611805                           | 502.5503078                                      |
| 0.220781833                                       | 0.379004192                                                | 1.117649915                           | 263.9439941                                      |
| 0.10361402                                        | 0.336201897                                                | 0.586020352                           | 120.0148534                                      |
| 0.091996423                                       | 0.416695773                                                | 0.852046484                           | 1932.047377                                      |
| 0.253135258                                       | 0.34523018                                                 | 0.915145704                           | 159.2339328                                      |
| 0.092948418                                       | 0.369677                                                   | 1.086756731                           | 551.6042094                                      |
| 0.09788529                                        | 0.317798276                                                | 0.727822186                           | 127.1116883                                      |
| 0.090118149                                       | 0.420027979                                                | 1.18961419                            | 736.1852849                                      |
| 0.09880373                                        | 0.345897074                                                | 0.926813621                           | 1204.657757                                      |
| 0.05389073                                        | 0.337742447                                                | 0.817068452                           | 398.1460385                                      |
| 0.092139899                                       | 0.390589635                                                | 1.185574689                           | 761.4654156                                      |
| 0.113671827                                       | 0.291951483                                                | 0.592874337                           | 102.3401809                                      |
| 0.24108302                                        | 0.35869426                                                 | 0.95762641                            | 287.6005836                                      |
| 0.115580095                                       | 0.30021778                                                 | 0.73501905                            | 145.7255812                                      |
| 0.05501062                                        | 0.367670195                                                | 0.890903353                           | 839.36773                                        |
| 0.056490585                                       | 0.326344421                                                | 0.886508475                           | 320.1296375                                      |
| 0.104965535                                       | 0.30199133                                                 | 0.72884534                            | 382.3876093                                      |
| 0.101195933                                       | 0.351760125                                                | 0.961941904                           | 588.9033463                                      |
| 0.097382398                                       | 0.348498286                                                | 0.991190503                           | 742.4432209                                      |
| 0.197207878                                       | 0.426367846                                                | 1.154731998                           | 1597.796176                                      |
| 0.060053001                                       | 0.276694753                                                | 0.619157256                           | 410.0332314                                      |
| 0.125432491                                       | 0.307086143                                                | 0.31128825                            | 25.67912473                                      |
| 0.126262492                                       | 0.262414602                                                | 0.41532707                            | 67.69010514                                      |
| 0.102118396                                       | 0.337073173                                                | 0.861932343                           | 456.4696249                                      |
| 0.107571795                                       | 0.292195893                                                | 0.711819038                           | 606.6254409                                      |
| 0.03609493                                        | 0.308908556                                                | 0.750459203                           | 729.5834551                                      |
| 0.223910079                                       | 0.380316537                                                | 0.848940885                           | 111.9697237                                      |
| 0.059221107                                       | 0.289399452                                                | 0.660441309                           | 218.937187                                       |
| 0.108380006                                       | 0.307533523                                                | 0.736838018                           | 316.632857                                       |
| 0.10475524                                        | 0.324443585                                                | 0.820559821                           | 210.013658                                       |
| 0.057990675                                       | 0.316378014                                                | 0.729834627                           | 363.1887302                                      |
| 0.111432289                                       | 0.29874313                                                 | 0.6978073                             | 216.7566278                                      |
| 0.060253137                                       | 0.306413991                                                | 0.637831951                           | 410.2718067                                      |
| 0.094789129                                       | 0.35217998                                                 | 0.810768735                           | 547.4172295                                      |
| 0.026108751                                       | 0.271705005                                                | 0.569777194                           | 852.4540039                                      |
| 0.11066927                                        | 0.307860588                                                | 0.697379949                           | 127.4110563                                      |
| 0.114401693                                       | 0.38117924                                                 | 0.469387052                           | 317.77338371                                     |
| 0.059814144                                       | 0.323222074                                                | 0.601526276                           | 115.3746962                                      |
| 0.055226596                                       | 0.337326711                                                | 0.717378072                           | 807.8741336                                      |
| 0.10910026                                        | 0.30975081                                                 | 0.674847017                           | 182.9889949                                      |
| 0.036019083                                       | 0.321412535                                                | 0.768140424                           | 855.4186072                                      |
| 0.224331404                                       | 0.357323046                                                | 0.652889244                           | 148.251509                                       |
| 0.094073403                                       | 0.37876896                                                 | 0.718011615                           | 1760.251145                                      |
| 0.139379483                                       | 0.245644783                                                | 0.457198486                           | 165.6528934                                      |
| 0.059697209                                       | 0.260333823                                                | 0.632533493                           | 418.3613001                                      |
| 0.061132527                                       | 0.294333736                                                | 0.548154358                           | 278.8549886                                      |
| 0.115492967                                       | 0.313183378                                                | 0.639261787                           | 181.0308681                                      |
| 0.056067348                                       | 0.37773466                                                 | 0.985479309                           | 216.8605854                                      |
| 0.057473319                                       | 0.303319341                                                | 0.741891932                           | 450.8668814                                      |
| 0.057409272                                       | 0.311893608                                                | 0.742793938                           | 1206.428897                                      |
| 0.053330179                                       | 0.390482562                                                | 0.843685189                           | 824.6844276                                      |
| 0.011853934                                       | 0.402877605                                                | 1.074088548                           | 703.038701                                       |
| 0.257310216                                       | 0.338798754                                                | 0.521649212                           | 52.89070046                                      |
| 0.055658806                                       | 0.300352372                                                | 0.561046057                           | 343.9436705                                      |
| 0.124992742                                       | 0.277049361                                                | 0.395662073                           | 84.78913761                                      |
| 0.056093744                                       | 0.320305514                                                | 0.800637234                           | 712.7842127                                      |
| 0.110990623                                       | 0.310791376                                                | 0.596833464                           | 99.94286479                                      |
| 0.058329746                                       | 0.290137684                                                | 0.601012688                           | 429.8731907                                      |
| 0.098792245                                       | 0.333922978                                                | 0.857534424                           | 695.0437987                                      |
| 0.101685134                                       | 0.345264815                                                | 0.867498746                           | 263.474699                                       |
| 0.096883501                                       | 0.368674454                                                | 1.020224468                           | 1267.805702                                      |
| 0.095269754                                       | 0.385363141                                                | 1.049264131                           | 1697.996874                                      |
| 0.057384843                                       | 0.332260739                                                | 0.711272331                           | 2141.691535                                      |
| 0.067329267                                       | 0.260233034                                                | 0.451051287                           | 221.8505244                                      |
| 0.104675574                                       | 0.322131349                                                | 0.785868844                           | 250.0214653                                      |
| 0.108594886                                       | 0.298739685                                                | 0.671544088                           | 129.761946                                       |
| 0.058426216                                       | 0.31838376                                                 | 0.940800793                           | 379.2350612                                      |
| 0.108297102                                       | 0.30400233                                                 | 0.813389036                           | 600.9057018                                      |
| 0.063870793                                       | 0.270918582                                                | 0.597673683                           | 100.0225314                                      |
| 0.069010778                                       | 0.231822999                                                | 0.364791605                           | 247.7224512                                      |
| 0.011859527                                       | 0.26381458                                                 | 0.41340933                            | 577.1879274                                      |
| 0.104715279                                       | 0.355350508                                                | 0.504439477                           | 37.25003764                                      |
| 0.096787136                                       | 0.348178862                                                | 0.891220246                           | 804.6424403                                      |
| 0.035006696                                       | 0.389128123                                                | 1.023825425                           | 1357.897647                                      |
| 0.101139064                                       | 0.33101303                                                 | 0.798590227                           | 176.7897                                         |
| 0.059642398                                       | 0.298809962                                                | 0.63050466                            | 334.7401481                                      |
| 0.098828493                                       | 0.326334086                                                | 0.465691271                           | 44.90466165                                      |
| 0.093662489                                       | 0.322760391                                                | 0.334222645                           | 27.49787583                                      |
| 0.026114046                                       | 0.32446995                                                 | 0.713649424                           | 911.1882811                                      |
| 0.040430339                                       | 0.245415507                                                | 0.49805954                            | 131.5553064                                      |
| 0.059134515                                       | 0.299842672                                                | 0.624160127                           | 221.7291899                                      |
| 0.056821931                                       | 0.332130416                                                | 0.914233583                           | 921.3298197                                      |
| 0.054142614                                       | 0.357265801                                                | 0.992704802                           | 1369.87943                                       |
| 0.072975311                                       | 0.209675284                                                | 0.308863901                           | 42.70555319                                      |
| 0.038671132                                       | 0.326725133                                                | 0.729542628                           | 272.1632342                                      |
| 0.102004234                                       | 0.315632624                                                | 0.352016901                           | 30.20492034                                      |
| 0.102317033                                       | 0.382080475                                                | 0.679383876                           | 97.40232085                                      |
| 0.10760297                                        | 0.292271429                                                | 0.652313541                           | 168.0123267                                      |

| log.sigma.0.5.mm.3D_glrIm_LongRunEmphasis | log.sigma.0.5.mm.3D_glrIm_ShortRunHighGrayLevelEmphasis | log.sigma.0.5.mm.3D_glrIm_RunLengthNonUniformity | log.sigma.0.5.mm.3D_glrIm_ShortRunEmphasis |
|-------------------------------------------|---------------------------------------------------------|--------------------------------------------------|--------------------------------------------|
| 2.367269666                               | 11.35380454                                             | 322.7897725                                      | 0.810726543                                |
| 3.131674485                               | 10.11541148                                             | 723.9975006                                      | 0.746658881                                |
| 2.501596161                               | 6.78121004                                              | 199.8158272                                      | 0.816059156                                |
| 2.269879493                               | 26.83147034                                             | 1245.121115                                      | 0.817417975                                |
| 2.956699001                               | 5.304141366                                             | 125.6771828                                      | 0.740368553                                |
| 2.882018595                               | 9.921977143                                             | 237.6444358                                      | 0.75813403                                 |
| 2.646900358                               | 9.327207286                                             | 135.9104927                                      | 0.774219927                                |
| 2.530928107                               | 17.47489204                                             | 437.7878038                                      | 0.800192873                                |
| 2.76459872                                | 16.2949794                                              | 808.6516046                                      | 0.771724365                                |
| 2.93229098                                | 16.73570829                                             | 1163.874519                                      | 0.765150715                                |
| 3.102642022                               | 9.680249892                                             | 295.5075526                                      | 0.751924898                                |
| 2.591552055                               | 25.62554144                                             | 636.0001809                                      | 0.796394134                                |
| 3.268101739                               | 9.931485236                                             | 700.3947364                                      | 0.738124221                                |
| 3.780603803                               | 5.080358047                                             | 328.9125765                                      | 0.704732723                                |
| 2.531649646                               | 10.37368755                                             | 373.6370276                                      | 0.783188045                                |
| 3.137102736                               | 9.711284534                                             | 2381.322184                                      | 0.738013146                                |
| 3.271129623                               | 5.156771653                                             | 235.2882047                                      | 0.73604433                                 |
| 3.598295655                               | 9.899125523                                             | 737.1047163                                      | 0.722425962                                |
| 2.885922735                               | 10.50620743                                             | 216.0451958                                      | 0.756851164                                |
| 3.839789894                               | 9.418200325                                             | 835.2177374                                      | 0.705185966                                |
| 3.191104136                               | 10.21281402                                             | 1816.090042                                      | 0.748821764                                |
| 3.014469                                  | 16.77322574                                             | 635.7166798                                      | 0.756393723                                |
| 3.80354868                                | 9.707688506                                             | 837.6940938                                      | 0.715915089                                |
| 2.500718629                               | 10.68862474                                             | 206.360832                                       | 0.79345959                                 |
| 3.253142875                               | 5.489436892                                             | 422.3556378                                      | 0.750017297                                |
| 2.809542087                               | 10.48628504                                             | 271.9330392                                      | 0.773373678                                |
| 3.21291608                                | 15.83273454                                             | 1150.849476                                      | 0.734798704                                |
| 3.061047049                               | 16.81359708                                             | 534.3758514                                      | 0.765069678                                |
| 2.781591996                               | 10.75617263                                             | 748.0622677                                      | 0.785665096                                |
| 3.295683971                               | 9.828710535                                             | 850.7101161                                      | 0.737398992                                |
| 3.255487735                               | 10.36797638                                             | 1136.109558                                      | 0.755862565                                |
| 3.744093471                               | 5.071859552                                             | 1815.460317                                      | 0.712792584                                |
| 2.52627832                                | 17.30929174                                             | 879.9828644                                      | 0.796192253                                |
| 1.887186361                               | 11.70584079                                             | 56.36272584                                      | 0.843951757                                |
| 2.10029095                                | 11.52309241                                             | 167.4487049                                      | 0.829775783                                |
| 3.115332379                               | 9.672206836                                             | 701.7817565                                      | 0.744646367                                |
| 2.65592611                                | 11.09741067                                             | 1229.013439                                      | 0.796341702                                |
| 2.78012249                                | 24.94821146                                             | 1333.528799                                      | 0.77886586                                 |
| 3.168004603                               | 5.148648989                                             | 283.4419662                                      | 0.734710994                                |
| 2.601548356                               | 17.1212519                                              | 444.463381                                       | 0.793386831                                |
| 2.810154648                               | 10.47148403                                             | 575.2515071                                      | 0.773628756                                |
| 3.019381592                               | 10.01267                                                | 345.3735474                                      | 0.755478484                                |
| 2.821124942                               | 16.09411025                                             | 638.2916333                                      | 0.769241879                                |
| 2.721700929                               | 10.5962661                                              | 411.6410846                                      | 0.778199987                                |
| 2.629658789                               | 16.16142915                                             | 756.1418501                                      | 0.777557834                                |
| 2.914418038                               | 10.61830578                                             | 871.1624022                                      | 0.772974473                                |
| 2.426038723                               | 35.52568496                                             | 1872.554476                                      | 0.800486029                                |
| 2.706526001                               | 10.70636812                                             | 238.5115136                                      | 0.786105634                                |
| 2.328540034                               | 9.954310809                                             | 58.24075154                                      | 0.791766643                                |
| 2.561409177                               | 16.23354347                                             | 203.7649191                                      | 0.78131594                                 |
| 2.783347688                               | 16.50334104                                             | 1322.489221                                      | 0.768555742                                |
| 2.684805676                               | 10.08928942                                             | 340.9611996                                      | 0.783180443                                |
| 2.850845484                               | 24.43977483                                             | 1477.731516                                      | 0.771006602                                |
| 2.702727798                               | 5.727065696                                             | 228.5121513                                      | 0.767378601                                |
| 2.720434541                               | 10.36654439                                             | 2679.596515                                      | 0.782317219                                |
| 2.167003947                               | 11.25303469                                             | 430.1155633                                      | 0.825428528                                |
| 2.544310978                               | 17.68615737                                             | 969.1969276                                      | 0.799011037                                |
| 2.43587164                                | 16.76384527                                             | 558.1504056                                      | 0.792932833                                |
| 2.636877049                               | 10.4173136                                              | 328.5841184                                      | 0.779867448                                |
| 3.398571155                               | 15.94611273                                             | 288.0855062                                      | 0.732407289                                |
| 2.793166142                               | 16.76821494                                             | 833.7579279                                      | 0.775912416                                |
| 2.770588532                               | 16.85052705                                             | 2197.927547                                      | 0.780204794                                |
| 3.049321932                               | 16.29906425                                             | 1136.583803                                      | 0.754807727                                |
| 3.559604676                               | 65.77800475                                             | 846.0275007                                      | 0.71834213                                 |
| 2.47268856                                | 5.589123655                                             | 87.69821183                                      | 0.773502516                                |
| 2.425745579                               | 17.81658755                                             | 684.6814624                                      | 0.798495846                                |
| 2.077894141                               | 10.81980191                                             | 196.595226                                       | 0.826009684                                |
| 2.889339423                               | 16.76446945                                             | 1243.915246                                      | 0.773496557                                |
| 2.532319186                               | 10.25033534                                             | 187.009261                                       | 0.789496777                                |
| 2.462250869                               | 17.66181932                                             | 895.527485                                       | 0.803244324                                |
| 3.043102693                               | 10.40098992                                             | 1126.158694                                      | 0.759497804                                |
| 3.097157059                               | 9.977400077                                             | 408.3206317                                      | 0.756106007                                |
| 3.324019577                               | 10.15752748                                             | 1803.425931                                      | 0.747514487                                |
| 3.402313519                               | 9.851650777                                             | 2253.554101                                      | 0.739322028                                |
| 2.750660419                               | 16.51775583                                             | 3573.849134                                      | 0.771068048                                |
| 2.188567766                               | 17.13530193                                             | 536.1406964                                      | 0.818051728                                |
| 2.901205366                               | 10.21318973                                             | 430.8791313                                      | 0.770253697                                |
| 2.676712485                               | 10.36243663                                             | 247.9689681                                      | 0.78062677                                 |
| 3.206366581                               | 16.10327876                                             | 635.0730299                                      | 0.754386378                                |
| 2.91103534                                | 10.39459096                                             | 1102.637859                                      | 0.773541376                                |
| 2.505338388                               | 17.06879888                                             | 220.3266843                                      | 0.797231298                                |
| 1.947089677                               | 18.82853067                                             | 722.3909665                                      | 0.847913688                                |
| 2.05445158                                | 78.01474508                                             | 1442.11002                                       | 0.837722092                                |
| 2.462817425                               | 10.65141251                                             | 59.56809795                                      | 0.77518697                                 |
| 3.08459512                                | 10.21517257                                             | 1246.280376                                      | 0.758094789                                |
| 3.511741475                               | 22.61014428                                             | 1674.281788                                      | 0.715959956                                |
| 2.942136377                               | 10.38977805                                             | 290.8050995                                      | 0.763757696                                |
| 2.57925294                                | 16.50126454                                             | 653.0293083                                      | 0.789307454                                |
| 2.342914878                               | 11.02865466                                             | 85.47775929                                      | 0.798107056                                |
| 1.904017576                               | 17.22534601                                             | 58.70634798                                      | 0.851450069                                |
| 2.738093454                               | 33.72840384                                             | 1582.370097                                      | 0.776694913                                |
| 2.243919754                               | 26.42251318                                             | 339.2886642                                      | 0.822200039                                |
| 2.546236165                               | 17.04244834                                             | 433.9805977                                      | 0.793450196                                |
| 3.119951742                               | 16.26424463                                             | 1491.831671                                      | 0.758763806                                |
| 3.309807113                               | 16.38754886                                             | 1976.922187                                      | 0.743455964                                |
| 1.859910741                               | 18.63625869                                             | 137.8385568                                      | 0.848180715                                |
| 2.880731518                               | 23.11651267                                             | 441.1118625                                      | 0.753047349                                |
| 2.020746895                               | 11.58763741                                             | 60.78323763                                      | 0.822433756                                |
| 2.921982073                               | 9.5325786                                               | 128.5966573                                      | 0.732004582                                |
| 2.642133528                               | 10.90166663                                             | 327.5247282                                      | 0.781159752                                |

| log.sigma.0.5.mm.3D_glrIm_LongRunHighGrayLevelEmphasis | log.sigma.0.5.mm.3D_glrIm_RunPercentage | log.sigma.0.5.mm.3D_glrIm_LongRunLowGrayLevelEmphasis | log.sigma.0.5.mm.3D_glrIm_RunEntropy |
|--------------------------------------------------------|-----------------------------------------|-------------------------------------------------------|--------------------------------------|
| 29.12786267                                            | 0.744388756                             | 0.249658898                                           | 3.072535222                          |
| 37.67507576                                            | 0.668382652                             | 0.306086996                                           | 3.061720511                          |
| 15.21035388                                            | 0.738036157                             | 0.644622366                                           | 3.029402717                          |
| 70.36406773                                            | 0.756035615                             | 0.083028807                                           | 3.23139281                           |
| 20.49100016                                            | 0.675808871                             | 0.585907137                                           | 2.873949318                          |
| 35.42064169                                            | 0.686206484                             | 0.276388482                                           | 2.973212114                          |
| 35.19918682                                            | 0.71239443                              | 0.244413722                                           | 2.744624888                          |
| 52.36570688                                            | 0.728773223                             | 0.142876476                                           | 3.135101933                          |
| 56.13093429                                            | 0.7000407                               | 0.154785844                                           | 3.149812092                          |
| 57.10739113                                            | 0.687788648                             | 0.16843068                                            | 3.120189507                          |
| 37.28392321                                            | 0.675006976                             | 0.29779198                                            | 2.915125536                          |
| 76.91957157                                            | 0.723087304                             | 0.098181329                                           | 3.203612397                          |
| 40.50104161                                            | 0.661189823                             | 0.301887123                                           | 2.993618328                          |
| 23.78505349                                            | 0.622677859                             | 0.774897186                                           | 3.0263722                            |
| 32.29116447                                            | 0.71814574                              | 0.240291495                                           | 2.928811035                          |
| 37.24618609                                            | 0.667128035                             | 0.295695706                                           | 2.812915291                          |
| 21.01688286                                            | 0.659576813                             | 0.706826686                                           | 3.00484372                           |
| 43.37592269                                            | 0.638903549                             | 0.338095136                                           | 3.042802488                          |
| 37.18581533                                            | 0.686888713                             | 0.268227478                                           | 3.050285036                          |
| 45.33671494                                            | 0.625490896                             | 0.359849978                                           | 2.893133731                          |
| 36.16213003                                            | 0.666318176                             | 0.322226041                                           | 3.024124788                          |
| 61.63108823                                            | 0.684660107                             | 0.162055552                                           | 3.036378299                          |
| 42.74704316                                            | 0.6288201                               | 0.374047759                                           | 2.954298566                          |
| 34.04654403                                            | 0.727970574                             | 0.23934221                                            | 3.063531717                          |
| 18.15548593                                            | 0.665154613                             | 0.760743149                                           | 2.968096934                          |
| 33.18805897                                            | 0.698736422                             | 0.297868666                                           | 3.090776317                          |
| 63.04075277                                            | 0.658395845                             | 0.177900774                                           | 3.016992362                          |
| 57.41218931                                            | 0.683289495                             | 0.178831632                                           | 3.042584586                          |
| 36.26694042                                            | 0.716801046                             | 0.266931751                                           | 3.042692612                          |
| 37.67553137                                            | 0.658022151                             | 0.331238875                                           | 3.057359178                          |
| 36.22859311                                            | 0.669199313                             | 0.331295282                                           | 2.986722472                          |
| 22.85415034                                            | 0.631249189                             | 0.748642209                                           | 2.861408435                          |
| 52.81310351                                            | 0.728253055                             | 0.141510626                                           | 3.179699308                          |
| 25.96808058                                            | 0.802514793                             | 0.207862677                                           | 2.780663459                          |
| 27.78739168                                            | 0.775718258                             | 0.230136509                                           | 3.024873963                          |
| 38.62754088                                            | 0.669725819                             | 0.295499731                                           | 3.049330387                          |
| 31.62186444                                            | 0.720405983                             | 0.277071247                                           | 3.099623038                          |
| 82.7121137                                             | 0.703706252                             | 0.100708923                                           | 3.075767853                          |
| 22.18615572                                            | 0.66605251                              | 0.602491589                                           | 2.882641137                          |
| 52.42629711                                            | 0.720539708                             | 0.147552658                                           | 3.10039527                           |
| 34.6257676                                             | 0.697943847                             | 0.281167459                                           | 3.112902574                          |
| 37.04036796                                            | 0.678343692                             | 0.294677878                                           | 3.089115961                          |
| 58.16062271                                            | 0.698023049                             | 0.154039858                                           | 3.061107318                          |
| 34.32351076                                            | 0.70739212                              | 0.275251284                                           | 3.133750815                          |
| 54.49813659                                            | 0.712214303                             | 0.145319705                                           | 3.094667919                          |
| 34.32983893                                            | 0.696485292                             | 0.283364854                                           | 2.897929504                          |
| 103.661325                                             | 0.735223052                             | 0.061635319                                           | 3.20909055                           |
| 33.18206013                                            | 0.708893257                             | 0.273404659                                           | 3.043894981                          |
| 31.49711973                                            | 0.738231917                             | 0.22192633                                            | 2.683826292                          |
| 54.84941047                                            | 0.717535985                             | 0.137611732                                           | 2.986485909                          |
| 56.067071                                              | 0.699069914                             | 0.152291607                                           | 2.994822394                          |
| 33.23640296                                            | 0.713142963                             | 0.267554051                                           | 2.983038986                          |
| 85.46821952                                            | 0.69615284                              | 0.102161448                                           | 3.067453127                          |
| 18.06022894                                            | 0.701418717                             | 0.556249273                                           | 2.87342477                           |
| 32.96858344                                            | 0.712013113                             | 0.258689026                                           | 2.790612586                          |
| 27.621332                                              | 0.766780432                             | 0.259663102                                           | 3.175055879                          |
| 52.74174518                                            | 0.731909222                             | 0.145635533                                           | 3.204716926                          |
| 53.13898649                                            | 0.732048307                             | 0.132687992                                           | 3.081828494                          |
| 32.46339451                                            | 0.70979021                              | 0.271726518                                           | 3.05329249                           |
| 66.00364714                                            | 0.650571903                             | 0.190621149                                           | 2.932592567                          |
| 55.43583716                                            | 0.700983773                             | 0.157703925                                           | 3.09101287                           |
| 56.25864337                                            | 0.705633724                             | 0.153858084                                           | 3.108358266                          |
| 60.78244109                                            | 0.682474483                             | 0.165023776                                           | 2.841574944                          |
| 318.0252934                                            | 0.638509422                             | 0.041062404                                           | 2.952490011                          |
| 15.7142777                                             | 0.719248493                             | 0.594553576                                           | 2.807866339                          |
| 51.35657001                                            | 0.736688296                             | 0.131392577                                           | 3.057543776                          |
| 26.67328537                                            | 0.775868801                             | 0.23042855                                            | 2.944036                             |
| 58.2717959                                             | 0.695435625                             | 0.159476389                                           | 3.068821681                          |
| 30.99820816                                            | 0.720593308                             | 0.256933965                                           | 2.962316719                          |
| 49.82132348                                            | 0.736334774                             | 0.140199704                                           | 3.086954607                          |
| 36.05271835                                            | 0.683704453                             | 0.30065672                                            | 3.015930923                          |
| 37.43449514                                            | 0.675001703                             | 0.300842178                                           | 3.021279548                          |
| 38.79099054                                            | 0.664607645                             | 0.325346128                                           | 2.983671519                          |
| 39.30453098                                            | 0.655598571                             | 0.331187846                                           | 2.932624047                          |
| 57.34061949                                            | 0.701935646                             | 0.148595251                                           | 3.066291577                          |
| 45.79811674                                            | 0.763027295                             | 0.13130768                                            | 3.136483301                          |
| 35.6257885                                             | 0.693547276                             | 0.284566241                                           | 3.049782779                          |
| 31.57689942                                            | 0.711223203                             | 0.279217794                                           | 3.00949847                           |
| 62.35724493                                            | 0.673425781                             | 0.182643655                                           | 3.097072918                          |
| 34.47044767                                            | 0.693794259                             | 0.297511619                                           | 3.121939298                          |
| 48.99804032                                            | 0.731074481                             | 0.151987921                                           | 3.14276677                           |
| 41.84781891                                            | 0.796650032                             | 0.121407946                                           | 3.171495442                          |
| 188.6544604                                            | 0.783281904                             | 0.023771164                                           | 3.128621956                          |
| 34.38731419                                            | 0.721485411                             | 0.220486224                                           | 2.785591518                          |
| 36.98879613                                            | 0.680852029                             | 0.296959556                                           | 2.973955976                          |
| 104.6621643                                            | 0.636862954                             | 0.123804115                                           | 3.036120363                          |
| 35.01148124                                            | 0.688597983                             | 0.290559985                                           | 2.992761993                          |
| 53.06193082                                            | 0.720707772                             | 0.144274943                                           | 3.050370558                          |
| 31.40220166                                            | 0.750315259                             | 0.216552606                                           | 2.765519269                          |
| 41.05283611                                            | 0.807326007                             | 0.13756868                                            | 2.726095986                          |
| 116.3789589                                            | 0.705970005                             | 0.068825946                                           | 3.068829168                          |
| 66.48824729                                            | 0.758988886                             | 0.08719244                                            | 3.201515742                          |
| 50.9143669                                             | 0.723242511                             | 0.145146829                                           | 3.06445606                           |
| 62.41345527                                            | 0.67752492                              | 0.172385123                                           | 3.103836414                          |
| 64.35079391                                            | 0.659927396                             | 0.184376968                                           | 3.026004864                          |
| 38.40404858                                            | 0.804803892                             | 0.125313405                                           | 3.233976311                          |
| 91.54900159                                            | 0.684400304                             | 0.099887203                                           | 3.118136545                          |
| 27.2177916                                             | 0.777360851                             | 0.195164798                                           | 2.740995756                          |
| 39.05264941                                            | 0.671808403                             | 0.258394336                                           | 2.929817683                          |
| 32.43272802                                            | 0.711152931                             | 0.267502777                                           | 3.147941231                          |

| log.sigma.0.5.mm.3D_glrIm_HighGrayLevelRunEmphasis | log.sigma.0.5.mm.3D_glrIm_RunLengthNonUniformityNormalized | log.sigma.0.5.mm.3D_glszm_GrayLevelVariance |
|----------------------------------------------------|------------------------------------------------------------|---------------------------------------------|
| 13.6485194                                         | 0.612817286                                                | 3.729224377                                 |
| 13.1614633                                         | 0.519245844                                                | 3.192906574                                 |
| 7.804151901                                        | 0.622054954                                                | 2.981070849                                 |
| 32.42401602                                        | 0.623588287                                                | 5.211927391                                 |
| 7.113102669                                        | 0.51341632                                                 | 2.339100346                                 |
| 12.92096065                                        | 0.535970105                                                | 2.425094646                                 |
| 12.35155666                                        | 0.560662736                                                | 2.693333333                                 |
| 21.5857908                                         | 0.597302476                                                | 3.518698061                                 |
| 20.90715005                                        | 0.554025935                                                | 3.360686782                                 |
| 21.28717015                                        | 0.544306173                                                | 3.489439058                                 |
| 12.69054829                                        | 0.526301838                                                | 2.317460317                                 |
| 31.62208394                                        | 0.59104202                                                 | 5.042735043                                 |
| 13.19790903                                        | 0.508077991                                                | 2.555729984                                 |
| 7.00508703                                         | 0.467110573                                                | 2.050453515                                 |
| 13.14546665                                        | 0.570213018                                                | 2.768175583                                 |
| 12.8270327                                         | 0.510273037                                                | 2.727887111                                 |
| 6.8875627                                          | 0.506279819                                                | 2.08984375                                  |
| 13.28751308                                        | 0.489186852                                                | 2.661376711                                 |
| 13.66194727                                        | 0.535813476                                                | 2.249657064                                 |
| 12.9621006                                         | 0.470489485                                                | 2.200050391                                 |
| 13.05660108                                        | 0.520705509                                                | 2.576216713                                 |
| 21.74432362                                        | 0.534533602                                                | 2.908093278                                 |
| 12.9719249                                         | 0.481588989                                                | 1.867566791                                 |
| 13.47092712                                        | 0.586784887                                                | 3.336076818                                 |
| 6.870742334                                        | 0.524197106                                                | 2.381012392                                 |
| 13.1475613                                         | 0.557569612                                                | 2.900826446                                 |
| 21.06165692                                        | 0.502899878                                                | 2.910304713                                 |
| 21.16027266                                        | 0.543613323                                                | 2.809632678                                 |
| 13.53973752                                        | 0.581380315                                                | 2.445982314                                 |
| 12.83170517                                        | 0.506654306                                                | 3.081512314                                 |
| 13.0600984                                         | 0.531308576                                                | 2.417418199                                 |
| 6.848839027                                        | 0.478489065                                                | 1.978584176                                 |
| 21.56206174                                        | 0.591325861                                                | 4.555789474                                 |
| 13.81258307                                        | 0.671778558                                                | 3.01                                        |
| 13.72675697                                        | 0.645980242                                                | 3.269916766                                 |
| 12.86114913                                        | 0.516491484                                                | 2.463718821                                 |
| 13.46632156                                        | 0.59037984                                                 | 3.422336838                                 |
| 31.53366556                                        | 0.563831572                                                | 3.440311419                                 |
| 6.979429436                                        | 0.50557305                                                 | 1.924701561                                 |
| 21.2764363                                         | 0.586167452                                                | 3.551715976                                 |
| 13.25134907                                        | 0.556673657                                                | 3.807526573                                 |
| 13.0531606                                         | 0.531493016                                                | 2.702292899                                 |
| 20.85566363                                        | 0.552147778                                                | 2.747130102                                 |
| 13.38751355                                        | 0.564420942                                                | 3.555555556                                 |
| 20.73668206                                        | 0.562944269                                                | 3.636114106                                 |
| 13.28223972                                        | 0.556673461                                                | 2.389245542                                 |
| 44.00788848                                        | 0.596215935                                                | 4.787277625                                 |
| 13.3146452                                         | 0.574856255                                                | 3.166204986                                 |
| 12.76398814                                        | 0.585616295                                                | 2.6875                                      |
| 20.89512516                                        | 0.569251963                                                | 3.122473246                                 |
| 21.15080723                                        | 0.550169944                                                | 2.88542227                                  |
| 12.751495                                          | 0.572916779                                                | 1.757785467                                 |
| 31.29266669                                        | 0.553192555                                                | 3.259695291                                 |
| 7.281314387                                        | 0.549090301                                                | 2.446280992                                 |
| 12.99279596                                        | 0.572259291                                                | 2.431210938                                 |
| 13.4391029                                         | 0.636732256                                                | 3.860833333                                 |
| 21.78419148                                        | 0.59746335                                                 | 3.989135355                                 |
| 21.26978233                                        | 0.58649952                                                 | 3.444951399                                 |
| 13.11670801                                        | 0.566700212                                                | 3.3875                                      |
| 21.17133986                                        | 0.499509545                                                | 2.453598914                                 |
| 21.20932299                                        | 0.559616494                                                | 3.0811                                      |
| 21.31000936                                        | 0.566359057                                                | 3.354431152                                 |
| 21.2060535                                         | 0.532851222                                                | 2.698395529                                 |
| 91.06833884                                        | 0.482560763                                                | 4.303819444                                 |
| 7.005076888                                        | 0.559466105                                                | 1.109375                                    |
| 22.08983662                                        | 0.595163083                                                | 3.963681133                                 |
| 13.04272694                                        | 0.639467311                                                | 2.987654321                                 |
| 21.33253106                                        | 0.556940113                                                | 2.919177204                                 |
| 12.85686492                                        | 0.580406671                                                | 2.635160681                                 |
| 21.61241609                                        | 0.602057936                                                | 3.825560698                                 |
| 13.25471248                                        | 0.537419422                                                | 2.520662559                                 |
| 12.9402656                                         | 0.532237845                                                | 2.480584391                                 |
| 13.11340278                                        | 0.521331995                                                | 2.719128804                                 |
| 12.88145871                                        | 0.509406402                                                | 2.553801605                                 |
| 21.2639342                                         | 0.553337772                                                | 3.889275937                                 |
| 20.95668235                                        | 0.626066936                                                | 4.809917355                                 |
| 13.01373483                                        | 0.552472765                                                | 2.30994898                                  |
| 12.91571277                                        | 0.568388589                                                | 2.541103018                                 |
| 20.88325389                                        | 0.52990787                                                 | 2.768276705                                 |
| 13.06051414                                        | 0.556283589                                                | 2.946523438                                 |
| 20.93985381                                        | 0.593521981                                                | 3.183837429                                 |
| 22.0532642                                         | 0.674780612                                                | 4.817089581                                 |
| 92.86805223                                        | 0.657454468                                                | 5.795915257                                 |
| 13.74031924                                        | 0.564045457                                                | 2.234375                                    |
| 13.13030508                                        | 0.535942651                                                | 2.363247863                                 |
| 31.10304934                                        | 0.478466875                                                | 3.106775                                    |
| 13.22226288                                        | 0.542863137                                                | 2.471470221                                 |
| 20.85271536                                        | 0.580628106                                                | 3.206313776                                 |
| 13.70670019                                        | 0.605712645                                                | 1.888888889                                 |
| 20.51585603                                        | 0.68532865                                                 | 4.094674556                                 |
| 43.24771076                                        | 0.561599844                                                | 4.428176574                                 |
| 31.54282516                                        | 0.631713836                                                | 4.863406795                                 |
| 21.14842709                                        | 0.585840205                                                | 3.690844233                                 |
| 21.09754714                                        | 0.535601876                                                | 3.172698001                                 |
| 21.39045369                                        | 0.514089915                                                | 2.956334265                                 |
| 21.66844468                                        | 0.675440956                                                | 4.503826531                                 |
| 31.02575763                                        | 0.528246515                                                | 3.649722222                                 |
| 13.89483243                                        | 0.633227389                                                | 2                                           |
| 13.16555083                                        | 0.502170427                                                | 3.169550173                                 |
| 13.49329466                                        | 0.568180171                                                | 3.384083045                                 |



| log.sigma.0.5.mm.3D_glszm_SmallAreaHighGrayLevelEmphasis | log.sigma.0.5.mm.3D_glszm_GrayLevelNonUniformityNormalized | log.sigma.0.5.mm.3D_glszm_SizeZoneNonUniformityNormalized |
|----------------------------------------------------------|------------------------------------------------------------|-----------------------------------------------------------|
| 11.92168837                                              | 0.191135734                                                | 0.414127424                                               |
| 11.74520296                                              | 0.23399654                                                 | 0.385380623                                               |
| 8.904168558                                              | 0.269875608                                                | 0.366143862                                               |
| 26.25390834                                              | 0.178325301                                                | 0.44056574                                                |
| 5.53795776                                               | 0.314878893                                                | 0.280276817                                               |
| 9.896091338                                              | 0.342347215                                                | 0.302325581                                               |
| 8.677492624                                              | 0.28                                                       | 0.28                                                      |
| 13.29803468                                              | 0.209141274                                                | 0.27700831                                                |
| 16.75212627                                              | 0.275849009                                                | 0.381643732                                               |
| 15.99970357                                              | 0.261599723                                                | 0.337603878                                               |
| 10.44805351                                              | 0.430839002                                                | 0.357142857                                               |
| 19.90378398                                              | 0.175542406                                                | 0.380013149                                               |
| 9.608401904                                              | 0.398864871                                                | 0.3082961                                                 |
| 4.333733062                                              | 0.416099773                                                | 0.27324263                                                |
| 8.879040482                                              | 0.307270233                                                | 0.341563786                                               |
| 10.45656669                                              | 0.304606401                                                | 0.264705882                                               |
| 3.709217469                                              | 0.44921875                                                 | 0.2421875                                                 |
| 9.029003358                                              | 0.35766713                                                 | 0.281888514                                               |
| 5.288356904                                              | 0.319615912                                                | 0.135802469                                               |
| 5.710923372                                              | 0.36558327                                                 | 0.272360796                                               |
| 10.2811806                                               | 0.333161157                                                | 0.333993343                                               |
| 12.3488749                                               | 0.342173449                                                | 0.289132754                                               |
| 8.889349653                                              | 0.325050273                                                | 0.290002873                                               |
| 9.206424887                                              | 0.207133059                                                | 0.459533608                                               |
| 7.459220239                                              | 0.304767906                                                | 0.358958202                                               |
| 12.47492052                                              | 0.297520661                                                | 0.358471074                                               |
| 14.00289896                                              | 0.337960209                                                | 0.286271399                                               |
| 14.50168648                                              | 0.273281512                                                | 0.318396586                                               |
| 7.807456926                                              | 0.250096117                                                | 0.273164168                                               |
| 12.09139742                                              | 0.25586773                                                 | 0.355763672                                               |
| 10.11475238                                              | 0.315932478                                                | 0.371892704                                               |
| 6.165065574                                              | 0.346966092                                                | 0.361392029                                               |
| 16.68066933                                              | 0.177617729                                                | 0.399889197                                               |
| 12.42249318                                              | 0.22                                                       | 0.18                                                      |
| 10.53293283                                              | 0.227110583                                                | 0.346016647                                               |
| 7.725308063                                              | 0.37585034                                                 | 0.277210884                                               |
| 12.34504446                                              | 0.210870859                                                | 0.343979369                                               |
| 19.28021096                                              | 0.269896194                                                | 0.334883218                                               |
| 5.805655688                                              | 0.417814509                                                | 0.359044995                                               |
| 15.35457779                                              | 0.223195266                                                | 0.363313609                                               |
| 12.03658145                                              | 0.239299052                                                | 0.426601551                                               |
| 8.835188589                                              | 0.279585799                                                | 0.37056213                                                |
| 15.45286332                                              | 0.286989796                                                | 0.343112245                                               |
| 9.616209277                                              | 0.212610534                                                | 0.304882737                                               |
| 14.29927851                                              | 0.252230174                                                | 0.338888344                                               |
| 9.27648538                                               | 0.331687243                                                | 0.320384088                                               |
| 32.00855795                                              | 0.197496815                                                | 0.462008677                                               |
| 6.325645435                                              | 0.257617729                                                | 0.289473684                                               |
| 4.942088633                                              | 0.25                                                       | 0.25                                                      |
| 16.54098789                                              | 0.248513674                                                | 0.455410226                                               |
| 15.28680275                                              | 0.291896914                                                | 0.30842584                                                |
| 12.95609557                                              | 0.519031142                                                | 0.346020761                                               |
| 21.37150388                                              | 0.263331025                                                | 0.318386427                                               |
| 8.231137638                                              | 0.322314005                                                | 0.376033058                                               |
| 9.92011249                                               | 0.28625                                                    | 0.34234375                                                |
| 10.79023162                                              | 0.213333333                                                | 0.305                                                     |
| 15.21769139                                              | 0.177229516                                                | 0.36713445                                                |
| 16.85741561                                              | 0.275143821                                                | 0.366395556                                               |
| 5.456965283                                              | 0.255                                                      | 0.24625                                                   |
| 17.1204316                                               | 0.383431417                                                | 0.466727026                                               |
| 12.19269957                                              | 0.2868                                                     | 0.2512                                                    |
| 18.72462282                                              | 0.216186523                                                | 0.394012451                                               |
| 15.10080197                                              | 0.320593714                                                | 0.452076197                                               |
| 46.42646646                                              | 0.305555556                                                | 0.302083333                                               |
| 5.207115075                                              | 0.34375                                                    | 0.25                                                      |
| 19.79581227                                              | 0.19975377                                                 | 0.418898122                                               |
| 8.618218959                                              | 0.251028807                                                | 0.418381344                                               |
| 15.23491593                                              | 0.260649146                                                | 0.34421071                                                |
| 10.16432047                                              | 0.372400756                                                | 0.270321361                                               |
| 16.0766838                                               | 0.193663225                                                | 0.284442862                                               |
| 8.526045056                                              | 0.314263101                                                | 0.321951495                                               |
| 11.37303222                                              | 0.347943099                                                | 0.334871203                                               |
| 11.32094291                                              | 0.286694102                                                | 0.363287702                                               |
| 8.823774765                                              | 0.309859438                                                | 0.335840254                                               |
| 15.33276715                                              | 0.223312835                                                | 0.345177544                                               |
| 12.54021694                                              | 0.208595041                                                | 0.430743802                                               |
| 12.00599568                                              | 0.357142857                                                | 0.359056122                                               |
| 10.39075652                                              | 0.321540062                                                | 0.396462019                                               |
| 15.36781842                                              | 0.320814045                                                | 0.335313128                                               |
| 10.63970198                                              | 0.241015625                                                | 0.33796875                                                |
| 21.56955757                                              | 0.253308129                                                | 0.392249527                                               |
| 13.98218682                                              | 0.178969627                                                | 0.434832757                                               |
| 72.43532003                                              | 0.14700503                                                 | 0.480185947                                               |
| 3.915148502                                              | 0.25                                                       | 0.15625                                                   |
| 9.024509009                                              | 0.347715319                                                | 0.344345825                                               |
| 20.89523411                                              | 0.32645                                                    | 0.375                                                     |
| 8.526688071                                              | 0.346105789                                                | 0.335276968                                               |
| 11.17477375                                              | 0.442602041                                                | 0.262117347                                               |
| 2.25777171                                               | 0.25                                                       | 0.180555556                                               |
| 7.566332353                                              | 0.218934911                                                | 0.408284024                                               |
| 26.47049993                                              | 0.21126422                                                 | 0.410110559                                               |
| 24.9863254                                               | 0.173553719                                                | 0.375114784                                               |
| 15.29629505                                              | 0.223543401                                                | 0.396551724                                               |
| 15.17039283                                              | 0.285082661                                                | 0.381007305                                               |
| 14.55267914                                              | 0.308066053                                                | 0.319095752                                               |
| 18.96539911                                              | 0.160714286                                                | 0.392857143                                               |
| 16.77493538                                              | 0.262777778                                                | 0.327222222                                               |
| 4.536783033                                              | 0.25                                                       | 0.21875                                                   |
| 7.921227336                                              | 0.224913495                                                | 0.266435986                                               |
| 13.74552652                                              | 0.210303729                                                | 0.284890427                                               |

| log.sigma.0.5.mm.3D_glszm_SizeZoneNonUniformity | log.sigma.0.5.mm.3D_glszm_GrayLevelNonUniformity | log.sigma.0.5.mm.3D_glszm_LargeAreaEmphasis | log.sigma.0.5.mm.3D_glszm_ZoneVariance |
|-------------------------------------------------|--------------------------------------------------|---------------------------------------------|----------------------------------------|
| 15.73684211                                     | 7.263157895                                      | 3694.578947                                 | 3349.401662                            |
| 26.20588235                                     | 15.91176471                                      | 23635.95588                                 | 22703.01276                            |
| 15.74418605                                     | 11.60465116                                      | 1300.418605                                 | 1198.549486                            |
| 65.6442953                                      | 26.5704698                                       | 12228.47651                                 | 11915.73271                            |
| 4.764705882                                     | 5.352941176                                      | 3124.882353                                 | 2678.927336                            |
| 13                                              | 14.72093023                                      | 3502.534884                                 | 3278.928069                            |
| 4.2                                             | 4.2                                              | 3142.066667                                 | 2637.315556                            |
| 10.52631579                                     | 7.947368421                                      | 7520.263158                                 | 6824.969529                            |
| 33.96629213                                     | 24.5505618                                       | 15539.22472                                 | 14993.55612                            |
| 51.31578947                                     | 39.76315789                                      | 22249.31579                                 | 21833.90703                            |
| 15                                              | 18.0952381                                       | 6379.357143                                 | 5991.64229                             |
| 29.64102564                                     | 13.69230769                                      | 8531                                        | 8170                                   |
| 28.05494505                                     | 36.2967033                                       | 18634.28571                                 | 18114.84652                            |
| 11.47619048                                     | 17.47619048                                      | 12085.95238                                 | 11377.37868                            |
| 18.44444444                                     | 16.59259259                                      | 5462.574074                                 | 15177.964678                           |
| 36                                              | 41.42647059                                      | 156355.1544                                 | 53745.8979                             |
| 7.75                                            | 14.375                                           | 5665.875                                    | 5190.089844                            |
| 20.01408451                                     | 25.3943662                                       | 30643.52113                                 | 29564.72248                            |
| 3.666666667                                     | 8.62962963                                       | 4139.333333                                 | 3674.691358                            |
| 17.15873016                                     | 23.03174603                                      | 55434.90476                                 | 53458.18493                            |
| 88.17424242                                     | 87.95454545                                      | 40282.68182                                 | 39891.12167                            |
| 23.41975309                                     | 27.71604938                                      | 13277.87654                                 | 12826.96967                            |
| 34.22033898                                     | 38.3559322                                       | 25393.63559                                 | 24857.98772                            |
| 12.40740741                                     | 5.592592593                                      | 2694.037037                                 | 2376.66941                             |
| 24.76811594                                     | 21.02898551                                      | 8476.173913                                 | 8171.696702                            |
| 15.77272727                                     | 13.09090909                                      | 3562.090909                                 | 3313.311983                            |
| 35.21138211                                     | 41.56910569                                      | 39312.03252                                 | 38517.98427                            |
| 25.79012346                                     | 22.13580247                                      | 9526.234568                                 | 9213.250419                            |
| 27.8627451                                      | 25.50980392                                      | 9022.794118                                 | 8723.368416                            |
| 33.08602151                                     | 23.79569892                                      | 27278.66667                                 | 26531.55556                            |
| 69.17204301                                     | 58.76344086                                      | 21376.19892                                 | 21084.08304                            |
| 59.26829268                                     | 56.90243902                                      | 95628.89024                                 | 94321.45048                            |
| 37.98947368                                     | 16.87368421                                      | 12496.95789                                 | 12038.99789                            |
| 1.8                                             | 2.2                                              | 359                                         | 250.84                                 |
| 10.03448276                                     | 6.586206897                                      | 997.5862069                                 | 866.5231867                            |
| 23.28571429                                     | 31.57142857                                      | 17562.16667                                 | 16983.87868                            |
| 48.84507042                                     | 29.94366197                                      | 18268.21127                                 | 17856.86431                            |
| 45.54411765                                     | 36.70588235                                      | 27353.61765                                 | 26745.41501                            |
| 11.84848485                                     | 13.78787879                                      | 8613.545455                                 | 7973.302112                            |
| 23.61538462                                     | 14.50769231                                      | 5118.015385                                 | 4857.565444                            |
| 25.16949153                                     | 14.11864407                                      | 12148.64407                                 | 11524.49124                            |
| 19.26923077                                     | 14.53846154                                      | 6015.634615                                 | 5679.758506                            |
| 19.21428571                                     | 16.07142857                                      | 16023.42857                                 | 15163.6824                             |
| 15.54901961                                     | 10.84313725                                      | 6471.588235                                 | 6067.657055                            |
| 34.22772277                                     | 25.47524752                                      | 11328.0198                                  | 10982.28076                            |
| 43.25185185                                     | 44.77777778                                      | 13814.42963                                 | 13542.05739                            |
| 115.0401606                                     | 49.17670683                                      | 20619.23695                                 | 20325.71336                            |
| 11                                              | 9.789473684                                      | 2930.921053                                 | 2695.540859                            |
| 2                                               | 2                                                | 941                                         | 660.4375                               |
| 13.20689655                                     | 7.206896552                                      | 2991.206897                                 | 2697.498216                            |
| 44.1048951                                      | 41.74125874                                      | 29411.3007                                  | 28837.98288                            |
| 11.76470588                                     | 17.64705882                                      | 6625.147059                                 | 6033.512976                            |
| 48.39473684                                     | 40.02631579                                      | 32751.21711                                 | 32119.29012                            |
| 8.272727273                                     | 7.090909091                                      | 6045.681818                                 | 5324.02686                             |
| 54.775                                          | 45.8                                             | 104975.8688                                 | 103313.7778                            |
| 18.3                                            | 12.8                                             | 3173.216667                                 | 2958.594167                            |
| 34.5106383                                      | 16.65957447                                      | 13369.94681                                 | 12825.66784                            |
| 26.01408451                                     | 19.53521127                                      | 7555.704225                                 | 7224.053958                            |
| 9.85                                            | 10.2                                             | 5540.35                                     | 5126.2275                              |
| 21.93617021                                     | 18.0212766                                       | 6809.680851                                 | 6458.317791                            |
| 25.12                                           | 28.68                                            | 14540.31                                    | 14091.2939                             |
| 100.8671875                                     | 55.34375                                         | 38285.72656                                 | 37827.83344                            |
| 58.31782946                                     | 41.35658915                                      | 30696.35659                                 | 30122.58698                            |
| 21.75                                           | 22                                               | 44230.51389                                 | 42791.78684                            |
| 2                                               | 2.75                                             | 2071.875                                    | 1336.109375                            |
| 23.87719298                                     | 11.38596491                                      | 13265.03509                                 | 12522.7116                             |
| 11.2962963                                      | 6.777777778                                      | 1556.37037                                  | 1343.426612                            |
| 45.09160305                                     | 34.14503817                                      | 26476.09924                                 | 25880.5157                             |
| 6.217391304                                     | 8.565217391                                      | 2832.521739                                 | 2456.499055                            |
| 30.1509434                                      | 20.52830189                                      | 11341.25472                                 | 10981.32939                            |
| 42.81954887                                     | 41.79699248                                      | 24838.4812                                  | 24316.03222                            |
| 17.07843137                                     | 17.74509804                                      | 9175.431373                                 | 8685.373318                            |
| 68.66137566                                     | 54.18518519                                      | 56892.99471                                 | 56145.305                              |
| 74.89237668                                     | 69.09865471                                      | 84235.13004                                 | 83328.12094                            |
| 122.5380282                                     | 79.27605634                                      | 83670.51268                                 | 83001.81678                            |
| 23.69090909                                     | 11.47272727                                      | 5834.945455                                 | 5423.224463                            |
| 20.10714286                                     | 20                                               | 7605.267857                                 | 7207.407844                            |
| 12.29032258                                     | 9.967741935                                      | 3748.258065                                 | 3361.057232                            |
| 35.87850467                                     | 34.3271028                                       | 10009.15888                                 | 9737.371299                            |
| 54.075                                          | 38.5625                                          | 16445.4375                                  | 16129.04234                            |
| 18.04347826                                     | 11.65217391                                      | 1527.434783                                 | 1407.389414                            |
| 44.35294118                                     | 18.25490196                                      | 3694.029412                                 | 3521.184256                            |
| 77.79012346                                     | 23.81481481                                      | 12868.16049                                 | 12571.13016                            |
| 1.25                                            | 2                                                | 1020.875                                    | 692.359375                             |
| 53.71794872                                     | 54.24358974                                      | 27402.8141                                  | 26930.30913                            |
| 75                                              | 65.29                                            | 63093.01                                    | 62343.3456                             |
| 16.42857143                                     | 16.95918367                                      | 4405.469388                                 | 4153.372761                            |
| 14.67857143                                     | 24.78571429                                      | 13630.46429                                 | 12862.38265                            |
| 2.166666667                                     | 3                                                | 913.75                                      | 681.1875                               |
| 5.307692308                                     | 2.846153846                                      | 302.0769231                                 | 236.8402367                            |
| 64.79746835                                     | 33.37974684                                      | 34489.46203                                 | 33856.5256                             |
| 24.75757576                                     | 11.45454545                                      | 1859.727273                                 | 1745.302112                            |
| 23                                              | 12.96551724                                      | 5770.206897                                 | 5459.718193                            |
| 77.7254902                                      | 58.15686275                                      | 29560.07843                                 | 29158.11524                            |
| 80.7312253                                      | 77.94071146                                      | 52476.89328                                 | 51950.25428                            |
| 11                                              | 4.5                                              | 472.4642857                                 | 390.8201531                            |
| 19.63333333                                     | 15.76666667                                      | 8950.166667                                 | 8539.428889                            |
| 1.75                                            | 2                                                | 599.375                                     | 362.984375                             |
| 4.529411765                                     | 3.823529412                                      | 3531.941176                                 | 3034.913495                            |
| 14.52941176                                     | 10.7254902                                       | 4045.745098                                 | 3795.361015                            |

| log.sigma.0.5.mm.3D_glszm_ZonePercentage | log.sigma.0.5.mm.3D_glszm_LargeAreaLowGrayLevelEmphasis | log.sigma.0.5.mm.3D_glszm_LargeAreaHighGrayLevelEmphasis | log.sigma.0.5.mm.3D_glszm_HighGrayLevelZoneEmphasis |
|------------------------------------------|---------------------------------------------------------|----------------------------------------------------------|-----------------------------------------------------|
| 0.053824363                              | 357.6139142                                             | 42975.07895                                              | 18.28947368                                         |
| 0.032739528                              | 2183.83308                                              | 278225.0294                                              | 17.58823529                                         |
| 0.099078341                              | 290.5806137                                             | 6753.534884                                              | 13.58139535                                         |
| 0.05654649                               | 431.1107667                                             | 364022.0336                                              | 39.69798658                                         |
| 0.04735376                               | 512.1898693                                             | 22456.64706                                              | 10.64705882                                         |
| 0.066874028                              | 300.5256202                                             | 44392.60465                                              | 15.41860465                                         |
| 0.044510386                              | 244.8897963                                             | 43525.6                                                  | 12.93333333                                         |
| 0.037924152                              | 399.9360816                                             | 153519.6316                                              | 26.71052632                                         |
| 0.042809043                              | 817.5384268                                             | 313621.3371                                              | 26.92134831                                         |
| 0.049063912                              | 1226.814937                                             | 422501.4079                                              | 26.30263158                                         |
| 0.050785973                              | 564.2201653                                             | 78407.90476                                              | 15.76190476                                         |
| 0.052631579                              | 309.234141                                              | 244288.7949                                              | 33.48717949                                         |
| 0.043876567                              | 1638.43232                                              | 230112.9121                                              | 16.35164835                                         |
| 0.037567084                              | 2225.403935                                             | 77227.78571                                              | 7.833333333                                         |
| 0.059275521                              | 469.2906996                                             | 69263.83333                                              | 15.14814815                                         |
| 0.019576796                              | 14581.2                                                 | 1809588.419                                              | 18.78676471                                         |
| 0.045845272                              | 1022.107639                                             | 37187.59375                                              | 7.4375                                              |
| 0.030445969                              | 2748.180974                                             | 370689.8451                                              | 15.66197183                                         |
| 0.046391753                              | 342.7249486                                             | 54437.51852                                              | 14.62962963                                         |
| 0.022491967                              | 5071.558964                                             | 655705.9683                                              | 13.52380952                                         |
| 0.050535988                              | 3960.95444                                              | 436946.447                                               | 16.92424242                                         |
| 0.047093023                              | 694.6311999                                             | 266923.679                                               | 24                                                  |
| 0.043207616                              | 2450.301718                                             | 282071.2373                                              | 15.89830508                                         |
| 0.056133056                              | 218.7578498                                             | 36915.22222                                              | 13.48148148                                         |
| 0.05730897                               | 1814.812572                                             | 45071.43478                                              | 10.7826087                                          |
| 0.063400576                              | 330.3365846                                             | 41992.93182                                              | 18.18181818                                         |
| 0.035487594                              | 2134.224773                                             | 758425.3171                                              | 24.53658537                                         |
| 0.056524773                              | 546.9892001                                             | 172389.963                                               | 26.11111111                                         |
| 0.057790368                              | 760.5597794                                             | 116766.7941                                              | 14.76470588                                         |
| 0.036585366                              | 2629.947819                                             | 303833.0968                                              | 17.8172043                                          |
| 0.058508965                              | 2136.777605                                             | 226971.9731                                              | 16.8655914                                          |
| 0.027655987                              | 18546.59973                                             | 575584.4695                                              | 10.12195122                                         |
| 0.046728972                              | 647.3662788                                             | 257496.9474                                              | 23.91578947                                         |
| 0.096153846                              | 29.02981859                                             | 5102.8                                                   | 21.5                                                |
| 0.087349398                              | 86.19923372                                             | 13195.55172                                              | 16.37931034                                         |
| 0.041584158                              | 1538.472285                                             | 218083.5119                                              | 14.88095238                                         |
| 0.049305556                              | 1787.588257                                             | 200844.4507                                              | 19.30985915                                         |
| 0.040548599                              | 971.4371179                                             | 795165.3897                                              | 33.36764706                                         |
| 0.039520958                              | 1426.646675                                             | 60958.78788                                              | 9.696969697                                         |
| 0.061963775                              | 269.0980584                                             | 102858.4462                                              | 25.13846154                                         |
| 0.040027137                              | 1109.3417                                               | 145146.6102                                              | 15.76271186                                         |
| 0.054564533                              | 524.5084081                                             | 75321.59615                                              | 14.28846154                                         |
| 0.03410475                               | 815.1995031                                             | 334269.7679                                              | 24.80357143                                         |
| 0.049756098                              | 568.1246594                                             | 82175.13725                                              | 17                                                  |
| 0.053780618                              | 571.965398                                              | 237381.4653                                              | 23.84158416                                         |
| 0.06059246                               | 1297.984548                                             | 158552.2889                                              | 16.05185185                                         |
| 0.058368495                              | 504.4315231                                             | 865915.4578                                              | 45.81927711                                         |
| 0.065180103                              | 260.7616667                                             | 35934                                                    | 13.47368421                                         |
| 0.059701493                              | 71.17086806                                             | 13582.875                                                | 13.25                                               |
| 0.058350101                              | 144.3953966                                             | 65944.41379                                              | 24.79310345                                         |
| 0.041764019                              | 1552.143995                                             | 586111.4266                                              | 26.37062937                                         |
| 0.041112455                              | 604.8299183                                             | 82682.32353                                              | 20.70588235                                         |
| 0.039780162                              | 1140.055121                                             | 973568.3618                                              | 36.17105263                                         |
| 0.037225042                              | 1065.10899                                              | 40766                                                    | 10.90909091                                         |
| 0.024528591                              | 9597.433067                                             | 1244824.138                                              | 16.91875                                            |
| 0.068259386                              | 305.4302151                                             | 39253.26667                                              | 18.68333333                                         |
| 0.042863657                              | 719.0525096                                             | 271111.1702                                              | 24.91489362                                         |
| 0.05491106                               | 362.1901182                                             | 168124.5211                                              | 27.05633803                                         |
| 0.049140049                              | 490.9872144                                             | 68316.225                                                | 13.95                                               |
| 0.053348468                              | 366.927234                                              | 132526.6596                                              | 23.57446809                                         |
| 0.047192072                              | 778.6257282                                             | 285607.78                                                | 24.89                                               |
| 0.046732384                              | 2052.946295                                             | 750168.5781                                              | 27.65625                                            |
| 0.041747573                              | 1646.83354                                              | 599946.3333                                              | 22.63565891                                         |
| 0.026363969                              | 498.433814                                              | 3968711.278                                              | 89.09722222                                         |
| 0.036866359                              | 410.0069444                                             | 13562.75                                                 | 10.875                                              |
| 0.036703155                              | 685.5044994                                             | 273868.9474                                              | 29.31578947                                         |
| 0.068527919                              | 139.8792181                                             | 20613.40741                                              | 13.37037037                                         |
| 0.040975915                              | 1389.751543                                             | 531010.5496                                              | 24.38931298                                         |
| 0.051569507                              | 249.5340097                                             | 35696.78261                                              | 17.60869565                                         |
| 0.052710094                              | 608.0747287                                             | 222492.5849                                              | 26.0754717                                          |
| 0.04375                                  | 2348.322765                                             | 283433.1504                                              | 14.79699248                                         |
| 0.045172719                              | 808.2993519                                             | 113597.8824                                              | 17.70588235                                         |
| 0.036571207                              | 5380.252773                                             | 648050.3704                                              | 17.43386243                                         |
| 0.033204288                              | 7985.065516                                             | 956353.6906                                              | 15.04035874                                         |
| 0.038671024                              | 4337.742934                                             | 1696990.642                                              | 24.25352113                                         |
| 0.049283154                              | 293.44329                                               | 124527.5273                                              | 20.09090909                                         |
| 0.050134288                              | 674.1928323                                             | 94160.17857                                              | 19.17857143                                         |
| 0.050819672                              | 348.7462455                                             | 44695.90323                                              | 16.06451613                                         |
| 0.060657596                              | 535.4006511                                             | 196476.215                                               | 24.42990654                                         |
| 0.056219255                              | 1554.9835                                               | 187726.225                                               | 16.40625                                            |
| 0.091269841                              | 81.66911047                                             | 30420.95652                                              | 29.2826087                                          |
| 0.07066264                               | 189.8551798                                             | 78472.70588                                              | 21.85294118                                         |
| 0.058022923                              | 143.1995279                                             | 1176734.136                                              | 100.1975309                                         |
| 0.055172414                              | 77.77045139                                             | 14510.625                                                | 13.625                                              |
| 0.046004129                              | 2539.371577                                             | 319867.4744                                              | 15.80769231                                         |
| 0.036523009                              | 2206.869708                                             | 1862624.745                                              | 34.635                                              |
| 0.062982005                              | 401.6587925                                             | 52455.36735                                              | 13.67346939                                         |
| 0.036082474                              | 705.5763509                                             | 284966.3036                                              | 26.625                                              |
| 0.06557377                               | 74.93962963                                             | 12284.83333                                              | 13                                                  |
| 0.123809524                              | 13.90985043                                             | 7045                                                     | 16.07692308                                         |
| 0.039748428                              | 832.8168376                                             | 1465472.652                                              | 42.19620253                                         |
| 0.093484419                              | 66.94642723                                             | 53721.48485                                              | 36.8030303                                          |
| 0.056751468                              | 306.5097386                                             | 114807.2931                                              | 23.17241379                                         |
| 0.049877751                              | 1570.324097                                             | 584582.7647                                              | 24.26960784                                         |
| 0.043575611                              | 2868.929259                                             | 1004202.32                                               | 24.96837945                                         |
| 0.110671937                              | 27.64288032                                             | 9282.75                                                  | 27.75                                               |
| 0.049342105                              | 286.6783187                                             | 288382.25                                                | 30.51666667                                         |
| 0.06504065                               | 49.30795139                                             | 8216.625                                                 | 14.25                                               |
| 0.044854881                              | 276.0981699                                             | 48672.82353                                              | 14.41176471                                         |
| 0.063197026                              | 386.0097456                                             | 46099.62745                                              | 21.82352941                                         |

| log.sigma.0.5.mm.3D_glszm_SmallAreaEmphasis | log.sigma.0.5.mm.3D_glszm_LowGrayLevelZoneEmphasis | log.sigma.0.5.mm.3D_glszm_ZoneEntropy | log.sigma.0.5.mm.3D_glszm_SmallAreaLowGrayLevelEmphasis |
|---------------------------------------------|----------------------------------------------------|---------------------------------------|---------------------------------------------------------|
| 0.660739514                                 | 0.239177408                                        | 3.8935416                             | 0.206479891                                             |
| 0.64146303                                  | 0.21877451                                         | 3.973766235                           | 0.166692848                                             |
| 0.624921777                                 | 0.367745478                                        | 3.561594767                           | 0.239073121                                             |
| 0.689181372                                 | 0.057287645                                        | 4.2464279                             | 0.044254166                                             |
| 0.531807143                                 | 0.404624183                                        | 3.219528282                           | 0.258626199                                             |
| 0.564787047                                 | 0.166576227                                        | 3.660496132                           | 0.099226506                                             |
| 0.509986167                                 | 0.294240741                                        | 2.866247897                           | 0.169120506                                             |
| 0.534439387                                 | 0.10354741                                         | 4.198603751                           | 0.072863193                                             |
| 0.640409771                                 | 0.086520102                                        | 3.938705796                           | 0.065170411                                             |
| 0.600710945                                 | 0.085982702                                        | 4.207456917                           | 0.053490281                                             |
| 0.616025498                                 | 0.162943122                                        | 3.148154485                           | 0.108452546                                             |
| 0.636668046                                 | 0.07782688                                         | 4.281062073                           | 0.058418229                                             |
| 0.566275795                                 | 0.161317062                                        | 3.653004201                           | 0.102065652                                             |
| 0.493700689                                 | 0.523478836                                        | 3.095996661                           | 0.247002148                                             |
| 0.600348208                                 | 0.206239712                                        | 3.686750452                           | 0.145804383                                             |
| 0.524949987                                 | 0.134917926                                        | 4.468746983                           | 0.075334232                                             |
| 0.496190112                                 | 0.567925347                                        | 3.405639062                           | 0.295375572                                             |
| 0.53402113                                  | 0.159847418                                        | 3.920480486                           | 0.092213025                                             |
| 0.323030986                                 | 0.161615226                                        | 4.236368984                           | 0.064252097                                             |
| 0.52078101                                  | 0.170992063                                        | 3.752343569                           | 0.111465759                                             |
| 0.596781017                                 | 0.15273408                                         | 4.049545124                           | 0.100786296                                             |
| 0.543236594                                 | 0.082933936                                        | 3.912650079                           | 0.054351972                                             |
| 0.545882498                                 | 0.123206215                                        | 4.019763974                           | 0.068253384                                             |
| 0.691867079                                 | 0.318878601                                        | 3.457867131                           | 0.275346561                                             |
| 0.619671447                                 | 0.400193237                                        | 3.789086997                           | 0.217503537                                             |
| 0.617061565                                 | 0.210852273                                        | 3.684301702                           | 0.131629859                                             |
| 0.545662641                                 | 0.084941513                                        | 4.105431097                           | 0.047146153                                             |
| 0.580484088                                 | 0.07589144                                         | 4.054082513                           | 0.05160756                                              |
| 0.536968267                                 | 0.189362745                                        | 4.517014354                           | 0.114280908                                             |
| 0.618506513                                 | 0.178984285                                        | 4.19295448                            | 0.127620144                                             |
| 0.632828441                                 | 0.134309152                                        | 3.893375474                           | 0.097042435                                             |
| 0.622368753                                 | 0.377511856                                        | 3.774584893                           | 0.238039756                                             |
| 0.653845828                                 | 0.120830098                                        | 4.298480547                           | 0.087006617                                             |
| 0.368361714                                 | 0.163179705                                        | 3.121928095                           | 0.02240387                                              |
| 0.601759167                                 | 0.233917625                                        | 3.620936065                           | 0.158449369                                             |
| 0.533919814                                 | 0.181848545                                        | 3.919736735                           | 0.120103504                                             |
| 0.607915452                                 | 0.193646203                                        | 4.408981903                           | 0.135364707                                             |
| 0.599563676                                 | 0.055138951                                        | 4.353323603                           | 0.038694604                                             |
| 0.615260305                                 | 0.393518519                                        | 3.116344031                           | 0.256769461                                             |
| 0.62295149                                  | 0.095838697                                        | 4.20549156                            | 0.07286606                                              |
| 0.669483358                                 | 0.273964218                                        | 3.718880186                           | 0.208036941                                             |
| 0.629669455                                 | 0.202879274                                        | 3.865325834                           | 0.152895399                                             |
| 0.606168236                                 | 0.089362144                                        | 3.936956272                           | 0.059339666                                             |
| 0.567706626                                 | 0.24664199                                         | 4.078755982                           | 0.183573405                                             |
| 0.602900806                                 | 0.105201135                                        | 4.169253232                           | 0.076618918                                             |
| 0.582865792                                 | 0.140007139                                        | 3.95447848                            | 0.089504221                                             |
| 0.706006367                                 | 0.041502919                                        | 4.282234681                           | 0.032246696                                             |
| 0.548265638                                 | 0.275921053                                        | 3.83977554                            | 0.219916311                                             |
| 0.438475703                                 | 0.317951389                                        | 2.5                                   | 0.25772795                                              |
| 0.69583464                                  | 0.104783603                                        | 3.486448667                           | 0.089688359                                             |
| 0.574513747                                 | 0.07234675                                         | 4.308278877                           | 0.046431208                                             |
| 0.605991884                                 | 0.140776144                                        | 3.085761182                           | 0.110100258                                             |
| 0.584586544                                 | 0.049766391                                        | 4.484918269                           | 0.033725688                                             |
| 0.62057229                                  | 0.411073232                                        | 3.083765141                           | 0.218547651                                             |
| 0.605441785                                 | 0.142950468                                        | 4.258954149                           | 0.097306263                                             |
| 0.567709914                                 | 0.275997543                                        | 4.215224664                           | 0.167402491                                             |
| 0.628052971                                 | 0.104168823                                        | 4.382489397                           | 0.073255391                                             |
| 0.626525577                                 | 0.100360576                                        | 3.86811287                            | 0.074037955                                             |
| 0.504637653                                 | 0.316767149                                        | 4.190399972                           | 0.226486115                                             |
| 0.705768603                                 | 0.087807329                                        | 2.996803229                           | 0.054108235                                             |
| 0.50559775                                  | 0.086483787                                        | 4.429737898                           | 0.053845156                                             |
| 0.651857033                                 | 0.086908122                                        | 4.526764908                           | 0.06358084                                              |
| 0.697763452                                 | 0.085927684                                        | 3.597218904                           | 0.066401016                                             |
| 0.563374736                                 | 0.027718377                                        | 4.181045831                           | 0.022806941                                             |
| 0.380416771                                 | 0.215277778                                        | 2.5                                   | 0.030121983                                             |
| 0.66698195                                  | 0.091722908                                        | 4.020348387                           | 0.070825674                                             |
| 0.660667436                                 | 0.330915638                                        | 3.151073839                           | 0.293847213                                             |
| 0.608043624                                 | 0.083379734                                        | 4.296553801                           | 0.052539554                                             |
| 0.523292647                                 | 0.205277778                                        | 3.288502306                           | 0.148275698                                             |
| 0.551551971                                 | 0.094251475                                        | 4.785787803                           | 0.060452969                                             |
| 0.584585419                                 | 0.173310359                                        | 4.093277762                           | 0.109914684                                             |
| 0.598324355                                 | 0.156830065                                        | 3.620872587                           | 0.106211348                                             |
| 0.626062852                                 | 0.163523618                                        | 4.212526182                           | 0.102936868                                             |
| 0.600195971                                 | 0.170519667                                        | 4.249825831                           | 0.116288779                                             |
| 0.608628547                                 | 0.105291431                                        | 4.555211868                           | 0.068546125                                             |
| 0.677839353                                 | 0.187775307                                        | 3.971039142                           | 0.155922961                                             |
| 0.620870944                                 | 0.14999504                                         | 3.687522373                           | 0.111585417                                             |
| 0.639715287                                 | 0.174202509                                        | 3.486139052                           | 0.131502252                                             |
| 0.601050222                                 | 0.088732649                                        | 4.128548089                           | 0.06118708                                              |
| 0.601865156                                 | 0.194142149                                        | 4.512611124                           | 0.133841743                                             |
| 0.646913224                                 | 0.085131002                                        | 3.767414048                           | 0.056867634                                             |
| 0.684606287                                 | 0.172434849                                        | 4.174801616                           | 0.140450696                                             |
| 0.719233716                                 | 0.018814311                                        | 4.393095116                           | 0.015315037                                             |
| 0.294568004                                 | 0.224201389                                        | 3                                     | 0.068766562                                             |
| 0.608355977                                 | 0.15242783                                         | 3.938112653                           | 0.108724438                                             |
| 0.635861887                                 | 0.047504114                                        | 3.972147385                           | 0.033898893                                             |
| 0.595446961                                 | 0.195391156                                        | 3.63117006                            | 0.132730168                                             |
| 0.523084404                                 | 0.098417355                                        | 3.76388549                            | 0.076989673                                             |
| 0.377573947                                 | 0.192152778                                        | 3.251629167                           | 0.137656765                                             |
| 0.640227893                                 | 0.313440171                                        | 2.81507241                            | 0.29348345                                              |
| 0.66438138                                  | 0.052102853                                        | 4.335232762                           | 0.042642602                                             |
| 0.633524333                                 | 0.066623453                                        | 4.134330259                           | 0.050498727                                             |
| 0.653119478                                 | 0.107672438                                        | 3.923553031                           | 0.082623877                                             |
| 0.640237705                                 | 0.086651279                                        | 4.056796681                           | 0.059582929                                             |
| 0.584197208                                 | 0.082346586                                        | 4.233954996                           | 0.056325212                                             |
| 0.639419129                                 | 0.114993218                                        | 4.039148672                           | 0.080090081                                             |
| 0.589814622                                 | 0.071724634                                        | 3.985774332                           | 0.048536128                                             |
| 0.382406563                                 | 0.206840278                                        | 3                                     | 0.144408867                                             |
| 0.517651589                                 | 0.275245098                                        | 3.410417253                           | 0.205154682                                             |
| 0.548207547                                 | 0.159574496                                        | 4.221130981                           | 0.10494672                                              |

| log.sigma.0.5.mm.3D_ngtdm_Coarseness | log.sigma.0.5.mm.3D_ngtdm_Complexity | log.sigma.0.5.mm.3D_ngtdm_Strength | log.sigma.0.5.mm.3D_ngtdm_Busyness | log.sigma.0.5.mm.3D_ngtdm_Contrast |
|--------------------------------------|--------------------------------------|------------------------------------|------------------------------------|------------------------------------|
| 0.008717686                          | 0.02143627                           | 0.137053861                        | 4.193496107                        | 4.48E-05                           |
| 0.002769024                          | 0.00410371                           | 0.034515106                        | 14.9228836                         | 1.08E-05                           |
| 0.013695528                          | 0.025564732                          | 0.178764832                        | 5.306291941                        | 0.000109968                        |
| 0.002413713                          | 0.013419235                          | 0.087512088                        | 5.651390087                        | 7.76E-06                           |
| 0.014583393                          | 0.015793019                          | 0.13611775                         | 4.627263457                        | 7.42E-05                           |
| 0.008741509                          | 0.014062667                          | 0.107036673                        | 4.543927315                        | 3.55E-05                           |
| 0.013885574                          | 0.018134369                          | 0.136572824                        | 3.463155239                        | 9.21E-05                           |
| 0.006481314                          | 0.01466136                           | 0.100708955                        | 4.219845855                        | 2.98E-05                           |
| 0.003093975                          | 0.006377134                          | 0.052418062                        | 8.536832652                        | 1.09E-05                           |
| 0.001894273                          | 0.005749568                          | 0.047647252                        | 11.18949245                        | 5.19E-06                           |
| 0.006502038                          | 0.007223249                          | 0.05637437                         | 8.246297247                        | 3.43E-05                           |
| 0.004081466                          | 0.017906667                          | 0.125627442                        | 3.747057068                        | 1.39E-05                           |
| 0.002587126                          | 0.006031589                          | 0.056454058                        | 11.77390749                        | 6.49E-06                           |
| 0.005139893                          | 0.002560317                          | 0.024026417                        | 21.47228669                        | 3.33E-05                           |
| 0.005865661                          | 0.01038276                           | 0.071587821                        | 6.84731117                         | 2.90E-05                           |
| 0.000697204                          | 0.001741458                          | 0.017584756                        | 43.94422754                        | 1.52E-06                           |
| 0.008440254                          | 0.004299779                          | 0.036267183                        | 13.80616652                        | 7.08E-05                           |
| 0.002511481                          | 0.003408674                          | 0.033703477                        | 15.55179798                        | 7.14E-06                           |
| 0.011165283                          | 0.01478171                           | 0.126431911                        | 3.614329683                        | 4.29E-05                           |
| 0.001887857                          | 0.002759314                          | 0.029142846                        | 19.9560583                         | 4.30E-06                           |
| 0.001036648                          | 0.00251143                           | 0.021603794                        | 31.05782447                        | 3.05E-06                           |
| 0.003230635                          | 0.010148444                          | 0.089213432                        | 6.285749749                        | 7.65E-06                           |
| 0.002054345                          | 0.002878754                          | 0.029344176                        | 18.96834104                        | 5.13E-06                           |
| 0.01267227                           | 0.020125144                          | 0.131742279                        | 3.304622382                        | 7.75E-05                           |
| 0.004530385                          | 0.008072305                          | 0.079124623                        | 13.04925196                        | 1.71E-05                           |
| 0.008995573                          | 0.013186732                          | 0.095147645                        | 4.96902358                         | 4.70E-05                           |
| 0.001462233                          | 0.003806609                          | 0.032006056                        | 16.75678442                        | 4.19E-06                           |
| 0.004150743                          | 0.012074952                          | 0.107314601                        | 5.036314466                        | 9.99E-06                           |
| 0.003930273                          | 0.004918406                          | 0.040578713                        | 10.73066328                        | 1.66E-05                           |
| 0.002239028                          | 0.004931535                          | 0.04626386                         | 14.45155403                        | 5.93E-06                           |
| 0.001800663                          | 0.003968352                          | 0.036841881                        | 17.85891791                        | 4.85E-06                           |
| 0.000882869                          | 0.00087483                           | 0.009400073                        | 79.37532662                        | 2.89E-06                           |
| 0.003203137                          | 0.012570697                          | 0.096579458                        | 5.730734798                        | 8.82E-06                           |
| 0.051343853                          | 0.146535124                          | 0.890999796                        | 0.630622328                        | 0.000347564                        |
| 0.018278322                          | 0.031730037                          | 0.176550376                        | 2.557532081                        | 0.000160158                        |
| 0.00302585                           | 0.004227223                          | 0.036364574                        | 13.27885191                        | 1.06E-05                           |
| 0.002208758                          | 0.004795747                          | 0.036444043                        | 16.1054849                         | 9.18E-06                           |
| 0.001701171                          | 0.006090904                          | 0.049284037                        | 10.18432531                        | 5.03E-06                           |
| 0.006047702                          | 0.003863527                          | 0.028737451                        | 16.72347113                        | 5.11E-05                           |
| 0.006081097                          | 0.017777722                          | 0.135739549                        | 3.571317285                        | 1.84E-05                           |
| 0.00394187                           | 0.006425934                          | 0.0438186                          | 11.16488152                        | 2.17E-05                           |
| 0.006583736                          | 0.008957625                          | 0.075972159                        | 6.271148159                        | 2.58E-05                           |
| 0.003745104                          | 0.008118146                          | 0.067045516                        | 6.719990799                        | 1.20E-05                           |
| 0.006105683                          | 0.013410792                          | 0.102733261                        | 5.456201104                        | 2.41E-05                           |
| 0.003114743                          | 0.009996271                          | 0.07530674                         | 6.731935559                        | 9.57E-06                           |
| 0.002442923                          | 0.005774153                          | 0.051279536                        | 13.18561005                        | 6.88E-06                           |
| 0.001409193                          | 0.00841945                           | 0.061972932                        | 7.903549131                        | 3.96E-06                           |
| 0.010367019                          | 0.015719589                          | 0.113438293                        | 4.153325898                        | 5.37E-05                           |
| 0.035103673                          | 0.045960915                          | 0.346229815                        | 1.359424645                        | 0.000273774                        |
| 0.011042906                          | 0.028293646                          | 0.208858945                        | 2.208788213                        | 4.47E-05                           |
| 0.00163025                           | 0.005216097                          | 0.043816737                        | 12.61496636                        | 3.92E-06                           |
| 0.007469842                          | 0.01132195                           | 0.082331137                        | 5.630752171                        | 3.44E-05                           |
| 0.001560931                          | 0.006125555                          | 0.05685901                         | 9.256352482                        | 2.99E-06                           |
| 0.00901295                           | 0.010243412                          | 0.076816384                        | 8.08735977                         | 5.41E-05                           |
| 0.000821196                          | 0.001921815                          | 0.018018612                        | 37.99089751                        | 2.05E-06                           |
| 0.007326698                          | 0.018383551                          | 0.103643508                        | 5.212556188                        | 5.11E-05                           |
| 0.002956232                          | 0.009253063                          | 0.060772368                        | 7.705807934                        | 1.19E-05                           |
| 0.004482035                          | 0.011318752                          | 0.077208514                        | 5.651693756                        | 2.24E-05                           |
| 0.007057959                          | 0.01732504                           | 0.127321374                        | 4.665485273                        | 2.83E-05                           |
| 0.006061096                          | 0.010900189                          | 0.107382291                        | 5.066338508                        | 1.97E-05                           |
| 0.003008995                          | 0.006356698                          | 0.051128471                        | 8.803653372                        | 1.01E-05                           |
| 0.001115112                          | 0.003249028                          | 0.027148787                        | 19.22494629                        | 3.06E-06                           |
| 0.001657716                          | 0.004039853                          | 0.038514185                        | 14.44566028                        | 3.94E-06                           |
| 0.001887629                          | 0.011829668                          | 0.23285574                         | 3.619286873                        | 1.99E-06                           |
| 0.025978734                          | 0.014790195                          | 0.110901267                        | 4.724539556                        | 0.000277601                        |
| 0.003873299                          | 0.012298635                          | 0.089764097                        | 5.482254689                        | 1.28E-05                           |
| 0.013851276                          | 0.028851892                          | 0.145315915                        | 3.25607069                         | 0.000123371                        |
| 0.001965405                          | 0.005325629                          | 0.049060982                        | 10.5779599                         | 4.43E-06                           |
| 0.013159668                          | 0.021618402                          | 0.146548122                        | 3.20577293                         | 6.75E-05                           |
| 0.003133548                          | 0.012382845                          | 0.09986919                         | 5.901826267                        | 8.12E-06                           |
| 0.001924014                          | 0.002914899                          | 0.023256107                        | 21.97232626                        | 7.73E-06                           |
| 0.005097131                          | 0.007680607                          | 0.063485682                        | 7.907223088                        | 1.94E-05                           |
| 0.00108338                           | 0.002327375                          | 0.023458169                        | 29.29771669                        | 2.62E-06                           |
| 0.000786725                          | 0.002525984                          | 0.02975753                         | 32.65720118                        | 1.32E-06                           |
| 0.000591565                          | 0.001995646                          | 0.015662459                        | 34.76229689                        | 1.72E-06                           |
| 0.005506045                          | 0.025550378                          | 0.161677483                        | 3.430477032                        | 2.10E-05                           |
| 0.005203763                          | 0.008258057                          | 0.060158895                        | 8.047853611                        | 2.44E-05                           |
| 0.010136146                          | 0.01591801                           | 0.107338422                        | 4.424398018                        | 5.17E-05                           |
| 0.003537373                          | 0.00734171                           | 0.063153446                        | 7.309379918                        | 1.03E-05                           |
| 0.002237272                          | 0.004668651                          | 0.038735682                        | 15.47314126                        | 7.62E-06                           |
| 0.01305266                           | 0.02858538                           | 0.195381314                        | 2.200411436                        | 6.35E-05                           |
| 0.00465314                           | 0.017065587                          | 0.087565301                        | 5.27014225                         | 3.10E-05                           |
| 0.002287011                          | 0.017475159                          | 0.14825839                         | 2.975227886                        | 6.09E-06                           |
| 0.039381864                          | 0.039748596                          | 0.35691598                         | 1.250644642                        | 0.00023554                         |
| 0.001697387                          | 0.003724423                          | 0.034515921                        | 18.82279904                        | 4.39E-06                           |
| 0.000915028                          | 0.004083844                          | 0.048557921                        | 15.04054824                        | 1.34E-06                           |
| 0.007638572                          | 0.011310991                          | 0.09124846                         | 5.449518351                        | 3.01E-05                           |
| 0.00396024                           | 0.009055149                          | 0.067767869                        | 6.523761466                        | 1.54E-05                           |
| 0.029909375                          | 0.037155924                          | 0.248625696                        | 1.85184109                         | 0.000237251                        |
| 0.041101927                          | 0.117290502                          | 0.65465808                         | 0.758949722                        | 0.000614906                        |
| 0.001406114                          | 0.007917668                          | 0.075609032                        | 7.425754499                        | 2.62E-06                           |
| 0.009570207                          | 0.039300136                          | 0.253444203                        | 1.715435999                        | 3.70E-05                           |
| 0.005549185                          | 0.019433341                          | 0.130869577                        | 3.902097136                        | 1.91E-05                           |
| 0.001395148                          | 0.004284258                          | 0.0368384                          | 14.86606709                        | 3.42E-06                           |
| 0.000941978                          | 0.003737717                          | 0.040132597                        | 18.12490126                        | 1.47E-06                           |
| 0.025807673                          | 0.094144341                          | 0.444827448                        | 1.077047471                        | 0.000215733                        |
| 0.004861089                          | 0.018457719                          | 0.182605065                        | 2.831926047                        | 1.01E-05                           |
| 0.046759359                          | 0.055282413                          | 0.368397088                        | 1.226907392                        | 0.000403247                        |
| 0.013861076                          | 0.02161698                           | 0.197159744                        | 2.603080203                        | 4.99E-05                           |
| 0.007528124                          | 0.017302986                          | 0.127073929                        | 4.797620314                        | 3.49E-05                           |

| original_gldm_GrayLevelVariance | original_gldm_HighGrayLevelEmphasis | original_gldm_GrayLevelNonUniformityNormalized | original_gldm_DependenceEntropy | original_gldm_DependenceNonUniformity |
|---------------------------------|-------------------------------------|------------------------------------------------|---------------------------------|---------------------------------------|
| 161.0092449                     | 994.631728                          | 0.059076792                                    | 6.58031688                      | 171.8016997                           |
| 146.8414747                     | 991.0279249                         | 0.074975504                                    | 7.042731135                     | 284.4405392                           |
| 125.1872465                     | 982.4354839                         | 0.040667672                                    | 6.51946347                      | 121.0967742                           |
| 206.3707326                     | 955.0732448                         | 0.039984733                                    | 7.139046071                     | 644.7237192                           |
| 87.5070181                      | 304.0640669                         | 0.037111754                                    | 6.30629952                      | 119.6740947                           |
| 105.486713                      | 510.9797823                         | 0.029732809                                    | 6.620767757                     | 214.2348367                           |
| 33.48410218                     | 132.4777448                         | 0.070521005                                    | 5.931115865                     | 81.07121662                           |
| 172.2371265                     | 573.0359281                         | 0.035661213                                    | 6.67183947                      | 277.9081836                           |
| 143.5596951                     | 929.8239538                         | 0.033154329                                    | 7.134911234                     | 525.9158249                           |
| 113.2046974                     | 1143.805358                         | 0.060051238                                    | 6.981925802                     | 599.6791478                           |
| 116.5039529                     | 488.662636                          | 0.037474191                                    | 6.701488054                     | 225.1112455                           |
| 150.23557                       | 1221.582996                         | 0.051505151                                    | 7.002192017                     | 303.7894737                           |
| 97.9709774                      | 502.3027965                         | 0.03021056                                     | 6.977767986                     | 569.8379942                           |
| 102.4555069                     | 532.5912343                         | 0.02993622                                     | 6.750476784                     | 352.4740608                           |
| 106.5674805                     | 594.4390779                         | 0.029028064                                    | 6.842885431                     | 294.3874863                           |
| 101.9638134                     | 1358.0321                           | 0.129665439                                    | 6.923150991                     | 676.4688355                           |
| 121.4255876                     | 504.4183381                         | 0.029884812                                    | 6.623869318                     | 227.025788                            |
| 156.2398333                     | 837.266295                          | 0.043294281                                    | 7.050188504                     | 494.8181818                           |
| 117.5190421                     | 411.8006873                         | 0.031441528                                    | 6.692233037                     | 178.4295533                           |
| 114.3511463                     | 951.6486969                         | 0.094954995                                    | 6.91059364                      | 409.5598001                           |
| 87.61422744                     | 996.3527948                         | 0.100326066                                    | 6.728146543                     | 833.3273354                           |
| 102.3916817                     | 1019.671512                         | 0.0305841                                      | 6.863925418                     | 534.3348837                           |
| 101.7803212                     | 803.1863786                         | 0.055573202                                    | 6.886513977                     | 560.6968144                           |
| 159.7196589                     | 505.7879418                         | 0.032939865                                    | 6.642435726                     | 137.3659044                           |
| 86.94636028                     | 1160.597176                         | 0.054818655                                    | 6.701334553                     | 272.2358804                           |
| 153.9146575                     | 794.573487                          | 0.049514571                                    | 6.774745844                     | 153.9423631                           |
| 87.33293233                     | 871.559146                          | 0.080510234                                    | 7.034924187                     | 508.1061743                           |
| 111.5425649                     | 931.1479414                         | 0.063560603                                    | 6.692067278                     | 292.3482205                           |
| 197.2095884                     | 663.0600567                         | 0.034688024                                    | 6.952600208                     | 481.8226629                           |
| 138.4853672                     | 1190.724626                         | 0.089688512                                    | 6.892354605                     | 365.4421715                           |
| 102.0910323                     | 966.6804026                         | 0.068534751                                    | 6.710687736                     | 619.3195974                           |
| 116.3797726                     | 1017.138786                         | 0.04667899                                     | 7.132020094                     | 1256.283642                           |
| 202.4037271                     | 867.378318                          | 0.050736628                                    | 7.043875515                     | 423.4849975                           |
| 68.18112056                     | 160.4519231                         | 0.070821006                                    | 5.406425032                     | 32.75                                 |
| 150.3271883                     | 650.3614458                         | 0.031481347                                    | 6.447499102                     | 111.1566265                           |
| 152.8039447                     | 636.629703                          | 0.033889325                                    | 6.971446883                     | 513.2990099                           |
| 191.5870944                     | 1232.142361                         | 0.089819155                                    | 6.827841215                     | 501.4902778                           |
| 125.0566872                     | 869.1067382                         | 0.046506116                                    | 7.042018961                     | 734.6577221                           |
| 109.1121948                     | 489.7125749                         | 0.031345692                                    | 6.882864383                     | 242.6550898                           |
| 178.0456397                     | 691.9818875                         | 0.059528299                                    | 6.6792963                       | 230.5843661                           |
| 154.2939495                     | 1224.879919                         | 0.075677183                                    | 7.06005691                      | 238.5970149                           |
| 134.7049677                     | 524.1563484                         | 0.035116366                                    | 6.659280107                     | 275.7345226                           |
| 147.8156759                     | 650.045067                          | 0.033230174                                    | 6.822374249                     | 466.043849                            |
| 149.0209123                     | 466.8341463                         | 0.03505818                                     | 6.821830578                     | 279.4917073                           |
| 118.1547451                     | 606.1458999                         | 0.028987061                                    | 6.861111137                     | 627.6964856                           |
| 89.42001485                     | 732.752693                          | 0.062404714                                    | 6.694029377                     | 432.7405745                           |
| 146.1961642                     | 1080.798172                         | 0.032419688                                    | 7.243312827                     | 1100.033755                           |
| 144.6592741                     | 644.6380789                         | 0.034055236                                    | 6.62214666                      | 175.9262436                           |
| 76.63293607                     | 177.380597                          | 0.057473825                                    | 5.653713213                     | 42.29850746                           |
| 128.1850378                     | 481.0503018                         | 0.040536984                                    | 6.53484649                      | 143.4828974                           |
| 129.5217267                     | 761.3011098                         | 0.047609405                                    | 6.956886254                     | 740.8294393                           |
| 176.1618735                     | 580.1378476                         | 0.045576368                                    | 6.560039451                     | 201.1185006                           |
| 165.0506535                     | 837.8563203                         | 0.066723854                                    | 7.035383898                     | 655.3643025                           |
| 97.65639127                     | 654.9678511                         | 0.036941603                                    | 6.604297647                     | 151.7715736                           |
| 130.0173583                     | 1167.690786                         | 0.122012091                                    | 6.685741053                     | 789.2618427                           |
| 223.1482953                     | 781.4300341                         | 0.030087712                                    | 6.917089226                     | 259.2684869                           |
| 177.8299468                     | 801.3488372                         | 0.028632121                                    | 7.124611962                     | 625.2352941                           |
| 123.4110832                     | 344.1392111                         | 0.0388821                                      | 6.765059418                     | 373.7115236                           |
| 168.7170161                     | 965.8427518                         | 0.03859969                                     | 6.887626575                     | 189.5061425                           |
| 91.62999172                     | 804.0533485                         | 0.03663544                                     | 6.690503884                     | 242.723042                            |
| 148.9988671                     | 819.3176026                         | 0.039186791                                    | 6.919091732                     | 529.4945729                           |
| 185.4266509                     | 1017.556407                         | 0.069484416                                    | 7.013597522                     | 1007.572107                           |
| 95.89383689                     | 907.3877023                         | 0.06523811                                     | 6.894252846                     | 543.5145631                           |
| 112.2250218                     | 936.1735628                         | 0.108256895                                    | 7.019621515                     | 290.1622116                           |
| 133.1894498                     | 596.5299539                         | 0.039011234                                    | 6.253087726                     | 58.91705069                           |
| 194.7030723                     | 990.9021249                         | 0.043016259                                    | 7.049197265                     | 339.9066323                           |
| 118.2825891                     | 551.2182741                         | 0.033986962                                    | 6.527777083                     | 125.3401015                           |
| 179.517131                      | 910.5961839                         | 0.054268796                                    | 6.889820677                     | 690.2668126                           |
| 134.9668855                     | 462.2847534                         | 0.035019807                                    | 6.434086854                     | 140.9686099                           |
| 166.9839013                     | 946.4236698                         | 0.052812218                                    | 6.856955808                     | 438.1009448                           |
| 151.2970291                     | 962.4973684                         | 0.039821243                                    | 7.015186857                     | 730.8592105                           |
| 146.508289                      | 667.3100089                         | 0.035069482                                    | 6.852240174                     | 283.8255093                           |
| 127.3747088                     | 925.3825464                         | 0.085564506                                    | 6.932869607                     | 804.5952012                           |
| 115.1647119                     | 1013.941185                         | 0.082594311                                    | 6.857726254                     | 1051.504765                           |
| 149.78564                       | 1344.75305                          | 0.05234098                                     | 7.311477353                     | 1732.430937                           |
| 174.2852931                     | 697.8584229                         | 0.027390771                                    | 6.899852623                     | 358.9390681                           |
| 136.0678727                     | 585.8343778                         | 0.030141325                                    | 6.792958444                     | 349.1378693                           |
| 126.745899                      | 655.8213115                         | 0.037678044                                    | 6.520844914                     | 173.052459                            |
| 164.7241385                     | 836.1626984                         | 0.034296409                                    | 6.972169238                     | 468.0725624                           |
| 142.8898882                     | 886.4581869                         | 0.061028066                                    | 6.885956679                     | 536.4722417                           |
| 227.5658856                     | 1009.345238                         | 0.023833144                                    | 6.743567877                     | 196.1269841                           |
| 180.2592454                     | 788.5197614                         | 0.025250225                                    | 6.920941287                     | 492.9970172                           |
| 246.4778079                     | 1114.00394                          | 0.045389354                                    | 6.954546454                     | 694.0451289                           |
| 72.76309156                     | 219.0896552                         | 0.056551724                                    | 5.697772087                     | 43.33103448                           |
| 107.4965644                     | 724.2813329                         | 0.047652724                                    | 6.956390724                     | 741.9997051                           |
| 111.5174869                     | 1089.541454                         | 0.058083657                                    | 7.220061139                     | 919.4134405                           |
| 128.519044                      | 715.6156812                         | 0.040232354                                    | 6.721856031                     | 205.9922879                           |
| 168.4864558                     | 618.5167526                         | 0.031150361                                    | 6.888253165                     | 464.1301546                           |
| 156.368957                      | 649.3060109                         | 0.076592314                                    | 5.989625251                     | 29.99453552                           |
| 84.79854875                     | 231.3238095                         | 0.069569161                                    | 5.230526947                     | 37.3047619                            |
| 172.2571851                     | 949.4674214                         | 0.056262268                                    | 7.215346887                     | 724.2558491                           |
| 195.0135383                     | 1289.254958                         | 0.038291777                                    | 6.812097392                     | 207.4957507                           |
| 152.3420225                     | 858.6428571                         | 0.049124735                                    | 7.025761932                     | 202.0176125                           |
| 136.7422594                     | 1101.520538                         | 0.059404116                                    | 7.160318942                     | 750.7090465                           |
| 107.2877246                     | 1031.831037                         | 0.063793925                                    | 6.867420026                     | 1072.432656                           |
| 239.9779406                     | 999.3833992                         | 0.029011545                                    | 6.575721617                     | 78.00395257                           |
| 186.8263876                     | 645.7935855                         | 0.03932165                                     | 7.062237158                     | 305.6776316                           |
| 114.8888889                     | 320.3333333                         | 0.046995836                                    | 5.654680131                     | 43.01626016                           |
| 56.43504292                     | 207.939314                          | 0.045300437                                    | 6.335634831                     | 99.9762533                            |
| 135.3851599                     | 1411.477076                         | 0.049945566                                    | 6.923728619                     | 160.2391574                           |

| original_gldm_GrayLevelNonUniformity | original_gldm_SmallDependenceEmphasis | original_gldm_DependenceNonUniformityNormalized | original_gldm_DependenceVariance | original_gldm_LargeDependenceEmphasis |
|--------------------------------------|---------------------------------------|-------------------------------------------------|----------------------------------|---------------------------------------|
| 41.7082153                           | 0.498778127                           | 0.243345184                                     | 11.37197955                      | 22.6605666                            |
| 155.7241213                          | 0.331316237                           | 0.13694778                                      | 11.74790128                      | 29.98988926                           |
| 17.64976959                          | 0.528576106                           | 0.279024825                                     | 3.437851728                      | 9.092165899                           |
| 105.3597723                          | 0.478683785                           | 0.244676933                                     | 5.653804392                      | 12.89981025                           |
| 13.32311978                          | 0.5392394                             | 0.333354024                                     | 0.838807737                      | 4.331476323                           |
| 19.11819596                          | 0.561839671                           | 0.33318015                                      | 1.242944112                      | 4.872472784                           |
| 23.76557864                          | 0.419466187                           | 0.240567408                                     | 2.038214654                      | 7.973293769                           |
| 35.73253493                          | 0.503163977                           | 0.277353477                                     | 3.13281222                       | 8.502994012                           |
| 68.92784993                          | 0.465088838                           | 0.252965765                                     | 2.875052547                      | 8.661375661                           |
| 186.0387347                          | 0.407555919                           | 0.19356977                                      | 8.568974507                      | 19.5029051                            |
| 28.73155985                          | 0.476114906                           | 0.272202232                                     | 2.523206356                      | 7.696493349                           |
| 76.33063428                          | 0.433659236                           | 0.20498615                                      | 5.981317875                      | 15.18488529                           |
| 62.65670203                          | 0.464358083                           | 0.274753131                                     | 1.503139852                      | 6.227579556                           |
| 33.4686941                           | 0.513861257                           | 0.315271969                                     | 1.244693277                      | 5.166368515                           |
| 26.44456641                          | 0.529833211                           | 0.323147625                                     | 1.05573422                       | 4.758507135                           |
| 900.7858068                          | 0.228030554                           | 0.097375678                                     | 14.18216193                      | 41.3339571                            |
| 20.85959885                          | 0.518117824                           | 0.325251845                                     | 1.029252633                      | 4.747851003                           |
| 100.9622642                          | 0.425457311                           | 0.212186184                                     | 5.484262509                      | 13.87735849                           |
| 18.29896907                          | 0.526422045                           | 0.306579988                                     | 1.329849671                      | 5.357388316                           |
| 265.9689397                          | 0.345539004                           | 0.146219136                                     | 20.01494137                      | 41.75830061                           |
| 524.1033691                          | 0.371940969                           | 0.159519015                                     | 17.99816549                      | 37.19410413                           |
| 52.60465116                          | 0.53794142                            | 0.310659816                                     | 1.575417793                      | 5.626744186                           |
| 151.7704138                          | 0.427330805                           | 0.205308244                                     | 8.227759691                      | 18.38777005                           |
| 15.84407484                          | 0.506932732                           | 0.285584001                                     | 1.637760902                      | 6.143451143                           |
| 66.00166113                          | 0.452951145                           | 0.226109535                                     | 4.991901304                      | 12.54983389                           |
| 34.36311239                          | 0.447821201                           | 0.221818967                                     | 6.61906502                       | 15.48126801                           |
| 279.0484709                          | 0.330714727                           | 0.146597281                                     | 9.365285192                      | 24.28101558                           |
| 91.08234473                          | 0.419396526                           | 0.204011319                                     | 6.696330002                      | 16.25750174                           |
| 61.22436261                          | 0.515170758                           | 0.272987344                                     | 2.892338756                      | 8.29631728                            |
| 227.9881983                          | 0.347417987                           | 0.143761673                                     | 13.12952872                      | 30.92053501                           |
| 217.8719723                          | 0.410774956                           | 0.194815853                                     | 6.408692979                      | 16.36520919                           |
| 276.8064081                          | 0.410344428                           | 0.211852216                                     | 5.674341858                      | 14.18145025                           |
| 103.1475652                          | 0.429739941                           | 0.208305459                                     | 7.496051984                      | 17.13871126                           |
| 7.365384615                          | 0.533103632                           | 0.314903846                                     | 1.054363905                      | 4.826292307                           |
| 10.45180723                          | 0.579215885                           | 0.334809116                                     | 2.618703731                      | 6.789156627                           |
| 68.45643564                          | 0.472373456                           | 0.254108421                                     | 2.778380551                      | 8.50990099                            |
| 258.6791667                          | 0.404158011                           | 0.174128569                                     | 13.60193673                      | 29.22638889                           |
| 155.9815146                          | 0.433269614                           | 0.219039273                                     | 5.374479302                      | 13.57722123                           |
| 26.17365269                          | 0.471583792                           | 0.290604898                                     | 1.287595826                      | 5.68502994                            |
| 62.44518589                          | 0.461518164                           | 0.219813504                                     | 7.942608195                      | 17.98951382                           |
| 111.5481682                          | 0.369268814                           | 0.161870431                                     | 14.12663646                      | 30.69606513                           |
| 33.46589717                          | 0.518312002                           | 0.28933182                                      | 2.808681702                      | 7.78069255                            |
| 54.56394641                          | 0.492677834                           | 0.283826948                                     | 1.970936486                      | 6.66626058                            |
| 35.93463415                          | 0.497070283                           | 0.272674836                                     | 2.720095181                      | 7.954146341                           |
| 54.43769968                          | 0.543364446                           | 0.334223668                                     | 0.972224774                      | 4.481363152                           |
| 139.037702                           | 0.403967318                           | 0.194228265                                     | 5.424551731                      | 14.83303411                           |
| 138.302391                           | 0.473474302                           | 0.257860702                                     | 3.109613646                      | 8.941397093                           |
| 19.8542024                           | 0.539240237                           | 0.301760281                                     | 3.241740686                      | 8.138939654                           |
| 7.701492537                          | 0.519939884                           | 0.315660503                                     | 0.921808866                      | 4.688567164                           |
| 20.14688129                          | 0.501652765                           | 0.288697983                                     | 1.69509613                       | 6.167002012                           |
| 163.0146028                          | 0.4231614                             | 0.216363738                                     | 4.958456729                      | 13.00058411                           |
| 37.69165659                          | 0.470332241                           | 0.243190448                                     | 3.864041443                      | 10.51632406                           |
| 254.9518451                          | 0.378783436                           | 0.171516436                                     | 8.585490822                      | 20.80162261                           |
| 21.83248731                          | 0.477869618                           | 0.256804693                                     | 2.810247337                      | 8.461928934                           |
| 795.8848689                          | 0.284080956                           | 0.120996757                                     | 9.520400379                      | 28.34692626                           |
| 26.44709898                          | 0.534628743                           | 0.294958461                                     | 4.517337289                      | 10.32878271                           |
| 62.79024168                          | 0.507336792                           | 0.285105013                                     | 1.825958273                      | 6.417236662                           |
| 50.2745553                           | 0.484970213                           | 0.2890267                                       | 1.426840582                      | 5.855375097                           |
| 31.42014742                          | 0.456684796                           | 0.232808529                                     | 4.663457069                      | 11.96805897                           |
| 32.27582293                          | 0.480539604                           | 0.275508561                                     | 1.600227272                      | 6.305334847                           |
| 83.03680982                          | 0.473128183                           | 0.249879459                                     | 3.421213627                      | 9.622935347                           |
| 380.6356334                          | 0.397316971                           | 0.183930651                                     | 10.88485963                      | 23.66046002                           |
| 201.5857605                          | 0.363738756                           | 0.175894681                                     | 5.336288895                      | 15.49773463                           |
| 295.6495789                          | 0.275864087                           | 0.106247606                                     | 16.44287237                      | 42.79348224                           |
| 8.465437788                          | 0.504067379                           | 0.271507146                                     | 5.557221432                      | 12.33640553                           |
| 66.80424984                          | 0.427241797                           | 0.21887098                                      | 3.412649177                      | 10.49517064                           |
| 13.39086294                          | 0.535763536                           | 0.318122085                                     | 1.123193074                      | 4.883248731                           |
| 173.4973413                          | 0.445225634                           | 0.215910795                                     | 5.790574699                      | 14.40444166                           |
| 15.61883408                          | 0.541360869                           | 0.316073116                                     | 2.157875686                      | 6.524663677                           |
| 106.2053705                          | 0.439672338                           | 0.217852285                                     | 4.536977504                      | 12.21133764                           |
| 121.0565789                          | 0.451169949                           | 0.240414214                                     | 2.700999983                      | 8.776973684                           |
| 39.59344553                          | 0.470876097                           | 0.251395491                                     | 2.991782                         | 8.929140833                           |
| 442.1973684                          | 0.365027123                           | 0.156687926                                     | 12.28666346                      | 28.84249226                           |
| 554.7033949                          | 0.351126611                           | 0.156567118                                     | 7.868187887                      | 20.97051817                           |
| 480.4901961                          | 0.390532167                           | 0.188717967                                     | 4.609956807                      | 13.6583878                            |
| 30.56810036                          | 0.540327178                           | 0.321629989                                     | 1.205964723                      | 4.965949821                           |
| 33.66786034                          | 0.53924982                            | 0.312567475                                     | 1.449398047                      | 5.431512981                           |
| 22.98360656                          | 0.513053136                           | 0.283692556                                     | 3.104208546                      | 8.462295082                           |
| 60.49886621                          | 0.495463137                           | 0.265347258                                     | 3.21961914                       | 8.904761905                           |
| 173.6858749                          | 0.413348487                           | 0.188500436                                     | 9.108218115                      | 20.9170766                            |
| 12.01190476                          | 0.636270792                           | 0.389140842                                     | 1.996582892                      | 5.46031746                            |
| 33.86055183                          | 0.598299155                           | 0.367633868                                     | 0.931399487                      | 4.046979866                           |
| 126.7270774                          | 0.474664514                           | 0.248583499                                     | 3.069596617                      | 9.095988539                           |
| 8.2                                  | 0.484243295                           | 0.298834721                                     | 1.095362663                      | 5.234482759                           |
| 161.5903863                          | 0.437601812                           | 0.218814422                                     | 4.501735604                      | 12.24329106                           |
| 318.0661066                          | 0.354263509                           | 0.167898729                                     | 7.362057742                      | 19.18882396                           |
| 31.30077121                          | 0.512479674                           | 0.264771578                                     | 4.478016931                      | 11.02056555                           |
| 48.34536082                          | 0.51205095                            | 0.299052935                                     | 1.485472686                      | 5.704896907                           |
| 14.01639344                          | 0.35580474                            | 0.163904566                                     | 5.63804415                       | 17.29508197                           |
| 7.304761905                          | 0.599555556                           | 0.355283447                                     | 1.164263039                      | 4.542857143                           |
| 223.6425157                          | 0.386844196                           | 0.182202729                                     | 6.824708137                      | 17.33861635                           |
| 27.03399433                          | 0.549930787                           | 0.29390333                                      | 3.904059899                      | 9.566572238                           |
| 50.20547945                          | 0.405150512                           | 0.197668897                                     | 8.108463126                      | 18.38356164                           |
| 242.9628362                          | 0.398838501                           | 0.183547444                                     | 8.245750803                      | 19.83569682                           |
| 370.3875301                          | 0.388851589                           | 0.184711102                                     | 4.997957498                      | 14.53909749                           |
| 7.339920949                          | 0.557908639                           | 0.308316018                                     | 1.986283179                      | 6.391304348                           |
| 41.26151316                          | 0.460267971                           | 0.251379631                                     | 3.396335591                      | 9.442434211                           |
| 5.780487805                          | 0.576889277                           | 0.349725692                                     | 1.20853989                       | 4.674796748                           |
| 17.16886544                          | 0.460899884                           | 0.263789587                                     | 1.789140983                      | 6.926121372                           |
| 40.30607187                          | 0.416465654                           | 0.198561533                                     | 5.437397984                      | 14.46716233                           |

| original_gldm_LargeDependenceLowGrayLevelEmphasis | original_gldm_SmallDependenceHighGrayLevelEmphasis | original_gldm_LargeDependenceHighGrayLevelEmphasis | original_gldm_SmallDependenceLowGrayLevelEmphasis |
|---------------------------------------------------|----------------------------------------------------|----------------------------------------------------|---------------------------------------------------|
| 0.021391799                                       | 349.6803913                                        | 38873.13031                                        | 0.00341825                                        |
| 0.090917239                                       | 220.8620839                                        | 41043.03178                                        | 0.003471677                                       |
| 0.014754118                                       | 395.6255644                                        | 13425.34793                                        | 0.004754211                                       |
| 0.034831993                                       | 375.1848662                                        | 19818.83264                                        | 0.004189515                                       |
| 0.110507418                                       | 167.2543911                                        | 1306.793872                                        | 0.012917212                                       |
| 0.031828306                                       | 243.1635133                                        | 3504.618974                                        | 0.007385324                                       |
| 0.215219091                                       | 82.39028066                                        | 590.7210682                                        | 0.01137987                                        |
| 0.157983855                                       | 237.0891444                                        | 8795.896208                                        | 0.009799633                                       |
| 0.020191658                                       | 374.9759655                                        | 10941.04954                                        | 0.003184347                                       |
| 0.018343745                                       | 362.6712904                                        | 30547.86152                                        | 0.001914806                                       |
| 0.051949317                                       | 183.7735825                                        | 6620.469166                                        | 0.006292436                                       |
| 0.015829432                                       | 428.4972473                                        | 24806.78138                                        | 0.002479948                                       |
| 0.055293427                                       | 211.7187994                                        | 3870.452266                                        | 0.005790113                                       |
| 0.044515066                                       | 236.3183971                                        | 3397.655635                                        | 0.005244404                                       |
| 0.027583907                                       | 324.279571                                         | 2780.164654                                        | 0.003964115                                       |
| 0.043045023                                       | 217.0687869                                        | 68075.75083                                        | 0.001083824                                       |
| 0.045361683                                       | 239.4825247                                        | 3090.01691                                         | 0.006256666                                       |
| 0.040939101                                       | 264.7264373                                        | 18197.31261                                        | 0.003579423                                       |
| 0.184530551                                       | 191.9269119                                        | 2739.628866                                        | 0.011324689                                       |
| 0.045535293                                       | 217.0599401                                        | 58150.27633                                        | 0.002101416                                       |
| 0.030862245                                       | 259.4961447                                        | 52060.55647                                        | 0.001525472                                       |
| 0.008757124                                       | 495.5506219                                        | 7493.955233                                        | 0.001817523                                       |
| 0.035258774                                       | 247.9057577                                        | 22724.31344                                        | 0.002722567                                       |
| 0.147317761                                       | 257.9331757                                        | 3672.577963                                        | 0.007409296                                       |
| 0.010821486                                       | 411.5271665                                        | 19476.25664                                        | 0.001942462                                       |
| 0.098346448                                       | 263.6045012                                        | 19247.27089                                        | 0.010039962                                       |
| 0.03299171                                        | 232.1011736                                        | 26478.99885                                        | 0.00231622                                        |
| 0.034312761                                       | 278.9596051                                        | 21547.61549                                        | 0.003688374                                       |
| 0.10807886                                        | 308.3014064                                        | 8208.840227                                        | 0.007138332                                       |
| 0.034878311                                       | 273.5398339                                        | 49936.18725                                        | 0.0022507                                         |
| 0.021428634                                       | 285.470326                                         | 22173.97137                                        | 0.002431202                                       |
| 0.018138705                                       | 326.8358803                                        | 20840.93609                                        | 0.001457215                                       |
| 0.068548136                                       | 296.8006628                                        | 23604.71471                                        | 0.004900476                                       |
| 0.449853026                                       | 118.4918643                                        | 358.7788462                                        | 0.025155805                                       |
| 0.036302501                                       | 333.9771714                                        | 7775.186747                                        | 0.006865568                                       |
| 0.063084237                                       | 255.7611917                                        | 8380.543564                                        | 0.004088858                                       |
| 0.030847093                                       | 329.5305332                                        | 54022.58681                                        | 0.002755506                                       |
| 0.026440589                                       | 300.2353116                                        | 17366.26118                                        | 0.002639534                                       |
| 0.049746624                                       | 227.5293143                                        | 2786.632335                                        | 0.007057007                                       |
| 0.212385949                                       | 235.6474086                                        | 20838.17064                                        | 0.016801368                                       |
| 0.031972263                                       | 353.4023485                                        | 51280.32361                                        | 0.002410872                                       |
| 0.057181981                                       | 231.5602663                                        | 7416.466946                                        | 0.005967204                                       |
| 0.035246575                                       | 293.1595822                                        | 6150.054811                                        | 0.00323678                                        |
| 0.26138598                                        | 210.0391733                                        | 5716.949268                                        | 0.010737439                                       |
| 0.025254388                                       | 331.9781907                                        | 2667.27689                                         | 0.003478526                                       |
| 0.025624542                                       | 213.2874378                                        | 15312.51391                                        | 0.003504479                                       |
| 0.01436112                                        | 453.4491852                                        | 13165.83943                                        | 0.001562911                                       |
| 0.05218441                                        | 273.0139808                                        | 9428.662093                                        | 0.006762129                                       |
| 0.515902981                                       | 102.5913661                                        | 792.768567                                         | 0.043825503                                       |
| 0.061377625                                       | 237.4987438                                        | 4038.060362                                        | 0.008468184                                       |
| 0.036283219                                       | 241.1197706                                        | 15135.37646                                        | 0.003432058                                       |
| 0.105071116                                       | 209.9272818                                        | 10947.23579                                        | 0.009271936                                       |
| 0.078865945                                       | 236.0697127                                        | 25468.10285                                        | 0.005197206                                       |
| 0.023565152                                       | 251.6724568                                        | 8221.522843                                        | 0.004538772                                       |
| 0.048833783                                       | 233.3602723                                        | 41448.83719                                        | 0.002076779                                       |
| 0.801032922                                       | 347.3413124                                        | 11389.35722                                        | 0.015781768                                       |
| 0.039832548                                       | 361.3418505                                        | 6267.589603                                        | 0.003470899                                       |
| 0.200156445                                       | 215.2038206                                        | 1247.834493                                        | 0.011444152                                       |
| 0.030616002                                       | 340.7936561                                        | 17743.67813                                        | 0.003444437                                       |
| 0.043208148                                       | 351.9969282                                        | 6180.141884                                        | 0.002023868                                       |
| 0.026249234                                       | 296.6065239                                        | 11993.44785                                        | 0.003815987                                       |
| 0.043782613                                       | 301.0250795                                        | 39270.13545                                        | 0.001992783                                       |
| 0.021318039                                       | 256.3113936                                        | 18547.09126                                        | 0.002240544                                       |
| 0.085851609                                       | 222.3168694                                        | 47250.57488                                        | 0.002632356                                       |
| 0.079677003                                       | 245.3344021                                        | 12140.6682                                         | 0.014304711                                       |
| 0.044485162                                       | 314.2877674                                        | 15283.5499                                         | 0.005013588                                       |
| 0.050881873                                       | 272.5467752                                        | 2760.426396                                        | 0.004871532                                       |
| 0.03486553                                        | 295.7083738                                        | 20967.39756                                        | 0.003045675                                       |
| 0.086025553                                       | 193.432683                                         | 5563.7287                                          | 0.019415947                                       |
| 0.029492331                                       | 312.406536                                         | 17279.29388                                        | 0.002995828                                       |
| 0.022655049                                       | 341.606177                                         | 11580.41053                                        | 0.003292283                                       |
| 0.048277654                                       | 243.6689936                                        | 9268.914969                                        | 0.00534159                                        |
| 0.049675974                                       | 224.7746144                                        | 38917.98394                                        | 0.002601427                                       |
| 0.032731713                                       | 247.2041745                                        | 28536.26608                                        | 0.00259072                                        |
| 0.017041514                                       | 457.9230211                                        | 22138.41362                                        | 0.001705944                                       |
| 0.038540442                                       | 365.3559764                                        | 4179.521505                                        | 0.004838657                                       |
| 0.046224085                                       | 272.0603658                                        | 4487.214861                                        | 0.006951876                                       |
| 0.031975733                                       | 259.9519541                                        | 9087.827869                                        | 0.00559389                                        |
| 0.042007473                                       | 330.1643694                                        | 11546.30215                                        | 0.004521204                                       |
| 0.034011361                                       | 267.208317                                         | 29419.3577                                         | 0.002290044                                       |
| 0.021043355                                       | 563.4221759                                        | 8231.753968                                        | 0.005841533                                       |
| 0.022096267                                       | 451.417861                                         | 3690.922446                                        | 0.004199505                                       |
| 0.052592996                                       | 420.6063818                                        | 14549.21096                                        | 0.006365743                                       |
| 0.181392123                                       | 140.0866858                                        | 694.9655172                                        | 0.012988854                                       |
| 0.074327831                                       | 244.527342                                         | 12992.18815                                        | 0.003639855                                       |
| 0.019930849                                       | 313.6422828                                        | 27715.03451                                        | 0.00127385                                        |
| 0.034676554                                       | 275.305                                            | 13152.32776                                        | 0.00570395                                        |
| 0.04775211                                        | 285.5408657                                        | 4612.064433                                        | 0.004934633                                       |
| 0.101101126                                       | 192.2762648                                        | 15254.04918                                        | 0.011853085                                       |
| 0.150612895                                       | 194.2444259                                        | 462.2190476                                        | 0.022785328                                       |
| 0.04982645                                        | 317.4922927                                        | 22038.99044                                        | 0.003924629                                       |
| 0.012893465                                       | 560.0721635                                        | 17466.93201                                        | 0.005120174                                       |
| 0.044073335                                       | 251.4290242                                        | 24509.99315                                        | 0.005194281                                       |
| 0.024618776                                       | 352.389393                                         | 30026.41638                                        | 0.001409359                                       |
| 0.01653762                                        | 306.3898134                                        | 19850.11591                                        | 0.001452941                                       |
| 0.037808174                                       | 479.0126694                                        | 8207.233202                                        | 0.011559294                                       |
| 0.057684311                                       | 312.5452211                                        | 8778.244243                                        | 0.004928943                                       |
| 0.15778045                                        | 177.7720438                                        | 1512.609756                                        | 0.033748827                                       |
| 0.306507819                                       | 122.2881067                                        | 992.8575198                                        | 0.011065193                                       |
| 0.013038972                                       | 433.5970412                                        | 25712.43618                                        | 0.003425657                                       |



| original_gldm_LowGrayLevelEmphasis | original_gldm_DistanceZoneVariabilityNormalized | original_gldm_LowIntensityEmphasis | original_gldm_LargeDistanceEmphasis | original_gldm_HighIntensitySmallDistanceEmphasis |
|------------------------------------|-------------------------------------------------|------------------------------------|-------------------------------------|--------------------------------------------------|
| 0.004488113                        | 0.850867575                                     | 0.006684073                        | 1.243455497                         | 612.8789267                                      |
| 0.007606453                        | 0.862825789                                     | 0.010737443                        | 1.222222222                         | 589.0671296                                      |
| 0.005686937                        | 0.880636815                                     | 0.008534019                        | 1.19123506                          | 685.12251                                        |
| 0.007071507                        | 0.824633117                                     | 0.008749917                        | 1.291344124                         | 712.1289585                                      |
| 0.024217642                        | 0.84537284                                      | 0.023761718                        | 1.253333333                         | 272.2677778                                      |
| 0.010315311                        | 0.846881056                                     | 0.012599672                        | 1.250614251                         | 377.4404177                                      |
| 0.026779518                        | 0.622006097                                     | 0.027051721                        | 1.759036145                         | 109.2123494                                      |
| 0.023893774                        | 0.813939009                                     | 0.021223073                        | 1.311418685                         | 395.5601211                                      |
| 0.004743376                        | 0.898828043                                     | 0.006492434                        | 1.160326087                         | 761.2361866                                      |
| 0.002908122                        | 0.944073704                                     | 0.004570205                        | 1.086376404                         | 854.1917135                                      |
| 0.011197432                        | 0.830519849                                     | 0.01306845                         | 1.280434783                         | 337.2086957                                      |
| 0.003583243                        | 0.888688752                                     | 0.005677024                        | 1.177464789                         | 915.5496479                                      |
| 0.010219419                        | 0.90201079                                      | 0.011825225                        | 1.154991243                         | 436.8476357                                      |
| 0.009068595                        | 0.872992044                                     | 0.009901309                        | 1.204444444                         | 433.2518519                                      |
| 0.006688618                        | 0.821135758                                     | 0.007317673                        | 1.29787234                          | 552.7367021                                      |
| 0.00277228                         | 0.899219474                                     | 0.005243432                        | 1.159668835                         | 855.6788882                                      |
| 0.011447269                        | 0.737139551                                     | 0.012164905                        | 1.466981132                         | 369.0123821                                      |
| 0.006841636                        | 0.958352196                                     | 0.008483092                        | 1.063829787                         | 589.1482713                                      |
| 0.025895703                        | 0.780716066                                     | 0.02254529                         | 1.376068376                         | 309.3539886                                      |
| 0.004070254                        | 0.931664798                                     | 0.00618947                         | 1.10626703                          | 588.167802                                       |
| 0.002515864                        | 0.87880192                                      | 0.004072751                        | 1.194393382                         | 642.7657399                                      |
| 0.002620855                        | 0.825772492                                     | 0.00321469                         | 1.289224953                         | 835.4834594                                      |
| 0.005215727                        | 0.91869228                                      | 0.006695199                        | 1.127369219                         | 546.5507961                                      |
| 0.018413241                        | 0.657830663                                     | 0.015676489                        | 1.657243816                         | 371.110424                                       |
| 0.002524051                        | 0.886491599                                     | 0.004102535                        | 1.181208054                         | 850.0604027                                      |
| 0.018698762                        | 0.940756173                                     | 0.023428988                        | 1.091666667                         | 562.5729167                                      |
| 0.004040843                        | 0.868996953                                     | 0.007140545                        | 1.211401425                         | 642.1633017                                      |
| 0.006530452                        | 0.94816358                                      | 0.009027503                        | 1.079881657                         | 643.5835799                                      |
| 0.014894868                        | 0.912007481                                     | 0.014269697                        | 1.138370952                         | 556.0500491                                      |
| 0.004627547                        | 0.917575118                                     | 0.007346771                        | 1.129201681                         | 721.9952731                                      |
| 0.003872049                        | 0.951739824                                     | 0.005844314                        | 1.074226804                         | 670.2274914                                      |
| 0.00275656                         | 0.932888884                                     | 0.003537426                        | 1.104292302                         | 764.0390209                                      |
| 0.009742351                        | 0.893166592                                     | 0.011399291                        | 1.169868554                         | 646.213094                                       |
| 0.063951711                        | 0.73964497                                      | 0.048644144                        | 1.461538462                         | 127.1153846                                      |
| 0.010949049                        | 0.787387777                                     | 0.012157901                        | 1.362790698                         | 492.0627907                                      |
| 0.009254305                        | 0.820876512                                     | 0.009001826                        | 1.298357664                         | 483.1181569                                      |
| 0.004666613                        | 0.93536204                                      | 0.006905336                        | 1.100311042                         | 768.0651244                                      |
| 0.004908495                        | 0.900390833                                     | 0.006360727                        | 1.157703927                         | 646.0904834                                      |
| 0.011187039                        | 0.780845178                                     | 0.01387709                         | 1.375809935                         | 413.8191145                                      |
| 0.032965817                        | 0.903818874                                     | 0.038070101                        | 1.151969981                         | 451.8597561                                      |
| 0.004602974                        | 0.811768834                                     | 0.007031081                        | 1.315533981                         | 852.4466019                                      |
| 0.011278188                        | 0.835764743                                     | 0.011718913                        | 1.27079646                          | 384.3225664                                      |
| 0.006339921                        | 0.860517613                                     | 0.006471965                        | 1.226293103                         | 535.8332435                                      |
| 0.03042962                         | 0.817526314                                     | 0.023339014                        | 1.30464716                          | 358.2870052                                      |
| 0.00581392                         | 0.856225223                                     | 0.006193702                        | 1.233898305                         | 568.1625                                         |
| 0.005269363                        | 0.970795123                                     | 0.008458467                        | 1.044466403                         | 510.8589427                                      |
| 0.002707625                        | 0.804813409                                     | 0.003273169                        | 1.328820961                         | 851.5762009                                      |
| 0.010204763                        | 0.889273356                                     | 0.012070811                        | 1.176470588                         | 453.1442577                                      |
| 0.100371373                        | 0.701070791                                     | 0.091115042                        | 1.548780488                         | 100.277439                                       |
| 0.013488783                        | 0.746698435                                     | 0.016144203                        | 1.446366782                         | 375.7404844                                      |
| 0.006365209                        | 0.917974949                                     | 0.008144065                        | 1.128545564                         | 533.0173506                                      |
| 0.019666352                        | 0.89236046                                      | 0.020876425                        | 1.171232877                         | 386.8487443                                      |
| 0.010336482                        | 0.895123344                                     | 0.014219246                        | 1.166562695                         | 558.639582                                       |
| 0.006450618                        | 0.850703125                                     | 0.009104034                        | 1.24375                             | 460.1773438                                      |
| 0.004693911                        | 0.949663251                                     | 0.007655545                        | 1.077507599                         | 766.4822695                                      |
| 0.041924929                        | 0.808673469                                     | 0.030754345                        | 1.321428571                         | 574.8641917                                      |
| 0.007210893                        | 0.716684191                                     | 0.007110821                        | 1.512539185                         | 669.6935737                                      |
| 0.027608004                        | 0.682611027                                     | 0.024109304                        | 1.593495935                         | 315.2842141                                      |
| 0.006972209                        | 0.841556104                                     | 0.008509601                        | 1.260240964                         | 654.1331325                                      |
| 0.006236017                        | 0.943596012                                     | 0.005449857                        | 1.087136929                         | 703.560166                                       |
| 0.006029635                        | 0.914314158                                     | 0.007841513                        | 1.134564644                         | 586.1521548                                      |
| 0.004797553                        | 0.898207208                                     | 0.005293017                        | 1.161369193                         | 702.101467                                       |
| 0.003733223                        | 0.921166086                                     | 0.006156486                        | 1.123320158                         | 657.7711462                                      |
| 0.006719132                        | 0.951603667                                     | 0.010202127                        | 1.074441687                         | 768.5657568                                      |
| 0.019610288                        | 0.90997582                                      | 0.026216614                        | 1.141732283                         | 459.519685                                       |
| 0.009286109                        | 0.87371629                                      | 0.01237255                         | 1.203187251                         | 672.7642762                                      |
| 0.011243888                        | 0.72588014                                      | 0.010616954                        | 1.491803279                         | 393.272541                                       |
| 0.005735781                        | 0.928236247                                     | 0.006976437                        | 1.111813013                         | 618.1997789                                      |
| 0.02869511                         | 0.858935537                                     | 0.035052861                        | 1.229090909                         | 305.0781818                                      |
| 0.005699803                        | 0.88548483                                      | 0.007386512                        | 1.182926829                         | 640.2533028                                      |
| 0.005506647                        | 0.884723816                                     | 0.007415474                        | 1.184227537                         | 700.2895928                                      |
| 0.009119275                        | 0.921268547                                     | 0.011125661                        | 1.123152709                         | 485.0775862                                      |
| 0.005428205                        | 0.911726171                                     | 0.007669072                        | 1.138835878                         | 566.0320849                                      |
| 0.004597591                        | 0.950918922                                     | 0.00746692                         | 1.075522851                         | 661.3062548                                      |
| 0.002912094                        | 0.926698698                                     | 0.004415637                        | 1.114307343                         | 1118.719909                                      |
| 0.00834238                         | 0.776190932                                     | 0.008789893                        | 1.385164051                         | 569.5549215                                      |
| 0.012180832                        | 0.82212428                                      | 0.013360555                        | 1.296023564                         | 440.7945508                                      |
| 0.008674303                        | 0.893952784                                     | 0.010730451                        | 1.168539326                         | 467.6882022                                      |
| 0.007858895                        | 0.82486685                                      | 0.009039238                        | 1.290909091                         | 574.1292929                                      |
| 0.004651028                        | 0.836860309                                     | 0.005918601                        | 1.268792711                         | 563.6025057                                      |
| 0.007946354                        | 0.813738796                                     | 0.00901894                         | 1.311797753                         | 772.7514045                                      |
| 0.006397506                        | 0.790130491                                     | 0.006865459                        | 1.357377049                         | 672.2281421                                      |
| 0.0112289                          | 0.874467665                                     | 0.013573822                        | 1.201884253                         | 842.0893338                                      |
| 0.036477634                        | 0.688779213                                     | 0.033007812                        | 1.578313253                         | 169.0391566                                      |
| 0.00978707                         | 0.945296712                                     | 0.009463907                        | 1.084431138                         | 533.9465569                                      |
| 0.002345263                        | 0.731448469                                     | 0.003531265                        | 1.479452055                         | 767.2549087                                      |
| 0.009420584                        | 0.8972994                                       | 0.011810495                        | 1.162895928                         | 493.9066742                                      |
| 0.009171995                        | 0.782882798                                     | 0.009624577                        | 1.37173913                          | 455.8184783                                      |
| 0.020711865                        | 0.768888889                                     | 0.032991708                        | 1.4                                 | 462.9833333                                      |
| 0.036643865                        | 0.731989078                                     | 0.038097918                        | 1.47826087                          | 236.1521739                                      |
| 0.007800521                        | 0.875892528                                     | 0.010349617                        | 1.19941691                          | 744.9408163                                      |
| 0.005891401                        | 0.958158665                                     | 0.008870493                        | 1.064133017                         | 992.5593824                                      |
| 0.008895917                        | 0.86106762                                      | 0.012868687                        | 1.225321888                         | 559.9420601                                      |
| 0.002796771                        | 0.894139226                                     | 0.0036306                          | 1.168224299                         | 819.3826278                                      |
| 0.002514529                        | 0.90732216                                      | 0.003764261                        | 1.146135266                         | 731.3993559                                      |
| 0.014279851                        | 0.745                                           | 0.019046033                        | 1.45                                | 707.50625                                        |
| 0.009949842                        | 0.925706327                                     | 0.010918555                        | 1.115919629                         | 634.3249614                                      |
| 0.043592438                        | 0.821978357                                     | 0.053517446                        | 1.296296296                         | 253.4567901                                      |
| 0.029847963                        | 0.75115466                                      | 0.025148832                        | 1.436893204                         | 215.6541262                                      |
| 0.004089011                        | 0.953029826                                     | 0.007666394                        | 1.072192513                         | 1033.326872                                      |

| original_gldzm_LowIntensityLargeDistanceEmphasis | original_gldzm_HighIntensityEmphasis | original_gldzm_DistanceZoneVariability | original_gldzm_ZonePercentage | original_gldzm_IntensityVariabilityNormalized |
|--------------------------------------------------|--------------------------------------|----------------------------------------|-------------------------------|-----------------------------------------------|
| 0.006925867                                      | 684.0602094                          | 325.0314136                            | 0.541076487                   | 0.02831611                                    |
| 0.011104421                                      | 636.5701058                          | 652.2962963                            | 0.363986519                   | 0.027676297                                   |
| 0.008786108                                      | 739.7529886                          | 221.0398406                            | 0.578341014                   | 0.028396375                                   |
| 0.010418063                                      | 768.2744546                          | 1171.803659                            | 0.539278937                   | 0.023648985                                   |
| 0.024413499                                      | 309.1377778                          | 190.2088889                            | 0.626740947                   | 0.035614815                                   |
| 0.012966341                                      | 428.5601966                          | 344.6805897                            | 0.632970451                   | 0.03063707                                    |
| 0.029925283                                      | 186.4578313                          | 103.253012                             | 0.492581602                   | 0.048265351                                   |
| 0.02180128                                       | 460.733564                           | 470.4567474                            | 0.576846307                   | 0.029597347                                   |
| 0.006761132                                      | 794.7871377                          | 992.3061594                            | 0.531024531                   | 0.026704605                                   |
| 0.004655402                                      | 878.2401685                          | 1344.360955                            | 0.459651388                   | 0.028124408                                   |
| 0.013610837                                      | 382.7695652                          | 382.0391304                            | 0.556227328                   | 0.032967864                                   |
| 0.005867835                                      | 969.1661972                          | 630.9690141                            | 0.479082321                   | 0.024157905                                   |
| 0.012276575                                      | 454.6716287                          | 1030.096322                            | 0.550626808                   | 0.03044249                                    |
| 0.010418739                                      | 463.7185185                          | 589.2696296                            | 0.603756708                   | 0.030637037                                   |
| 0.007954523                                      | 605                                  | 463.1205674                            | 0.61909989                    | 0.027614305                                   |
| 0.005462219                                      | 894.9432289                          | 1520.58013                             | 0.243414423                   | 0.031366181                                   |
| 0.013015689                                      | 456.6509434                          | 312.5471698                            | 0.607449857                   | 0.029770381                                   |
| 0.008554168                                      | 605.3643617                          | 1081.021277                            | 0.483704974                   | 0.02755929                                    |
| 0.023733856                                      | 368.9373219                          | 274.031339                             | 0.603092784                   | 0.0314202                                     |
| 0.006321564                                      | 611.5349682                          | 1025.762943                            | 0.393073902                   | 0.029622975                                   |
| 0.004332454                                      | 686.0206801                          | 1912.272978                            | 0.416539051                   | 0.032392139                                   |
| 0.006439115                                      | 918.8412098                          | 873.6672968                            | 0.615116279                   | 0.029159416                                   |
| 0.00687324                                       | 573.0742987                          | 1211.755118                            | 0.48297327                    | 0.031600318                                   |
| 0.017726                                         | 491.335689                           | 186.1660777                            | 0.588357588                   | 0.028855398                                   |
| 0.004309121                                      | 899.8926174                          | 528.3489933                            | 0.495016611                   | 0.031608937                                   |
| 0.023516849                                      | 587.875                              | 338.6722222                            | 0.518731988                   | 0.028225309                                   |
| 0.00759015                                       | 676.7339667                          | 1097.543151                            | 0.364396999                   | 0.029190011                                   |
| 0.009195954                                      | 661.0754438                          | 640.9585799                            | 0.471737613                   | 0.030386716                                   |
| 0.014556109                                      | 583.703631                           | 929.3356232                            | 0.57733711                    | 0.026288545                                   |
| 0.007501861                                      | 754.5367647                          | 873.5315126                            | 0.374508261                   | 0.027454364                                   |
| 0.005966558                                      | 686.8151203                          | 1384.781443                            | 0.457691098                   | 0.029955716                                   |
| 0.003669798                                      | 788.203973                           | 2629.813764                            | 0.475379427                   | 0.027974542                                   |
| 0.012173213                                      | 675.7815976                          | 883.3417594                            | 0.486473192                   | 0.025507069                                   |
| 0.049414295                                      | 210.0769231                          | 48.07692308                            | 0.625                         | 0.053254438                                   |
| 0.012801521                                      | 578.3023256                          | 169.2883721                            | 0.647590361                   | 0.028491076                                   |
| 0.009639193                                      | 531.2755474                          | 899.6806569                            | 0.542574257                   | 0.027913381                                   |
| 0.007024383                                      | 796.0046656                          | 1202.875583                            | 0.446527778                   | 0.024853126                                   |
| 0.006885008                                      | 673.0193353                          | 1490.146828                            | 0.493440668                   | 0.027653271                                   |
| 0.014940997                                      | 477.6177106                          | 361.5313175                            | 0.554491018                   | 0.029990344                                   |
| 0.03830907                                       | 481.2645403                          | 481.7354597                            | 0.508102955                   | 0.027783547                                   |
| 0.007410278                                      | 936.2135922                          | 501.6731392                            | 0.4192673                     | 0.023863386                                   |
| 0.012221651                                      | 433.8902655                          | 472.2070796                            | 0.592864638                   | 0.03113478                                    |
| 0.006773344                                      | 588.7478448                          | 798.5603448                            | 0.565164434                   | 0.02855139                                    |
| 0.023987054                                      | 416.4578313                          | 474.9827883                            | 0.566829268                   | 0.030077527                                   |
| 0.006992554                                      | 608.7686441                          | 1010.345763                            | 0.628328009                   | 0.027550991                                   |
| 0.008525871                                      | 519.0059289                          | 982.444664                             | 0.454219031                   | 0.032688763                                   |
| 0.003842534                                      | 932.5244541                          | 1843.022707                            | 0.536802625                   | 0.024908755                                   |
| 0.012259077                                      | 497.0560224                          | 317.4705882                            | 0.612349914                   | 0.030153238                                   |
| 0.092138129                                      | 195.2439024                          | 57.48780488                            | 0.611940299                   | 0.051160024                                   |
| 0.017008098                                      | 459.7716263                          | 215.7958478                            | 0.581488934                   | 0.033584368                                   |
| 0.008395728                                      | 557.092939                           | 1521.08449                             | 0.483936916                   | 0.028806668                                   |
| 0.021183761                                      | 422.1210046                          | 390.8538813                            | 0.529625151                   | 0.031848794                                   |
| 0.014512727                                      | 589.9875234                          | 1434.88272                             | 0.419523685                   | 0.027383544                                   |
| 0.009399389                                      | 514.409375                           | 272.225                                | 0.541455161                   | 0.032128906                                   |
| 0.00776428                                       | 783.1752786                          | 1874.635258                            | 0.302621493                   | 0.029780767                                   |
| 0.031824442                                      | 644.3139098                          | 430.2142857                            | 0.60523322                    | 0.0238849                                     |
| 0.007974521                                      | 711.4153605                          | 914.4890282                            | 0.581851345                   | 0.024729513                                   |
| 0.025494699                                      | 430.7222222                          | 503.7669377                            | 0.570765661                   | 0.030423543                                   |
| 0.008809965                                      | 722.8240964                          | 349.2457831                            | 0.50982801                    | 0.025786036                                   |
| 0.005565796                                      | 722.4564315                          | 454.813278                             | 0.547105562                   | 0.031929547                                   |
| 0.008014224                                      | 617.4582234                          | 1039.575198                            | 0.536573856                   | 0.027178096                                   |
| 0.005665802                                      | 729.299511                           | 2204.200489                            | 0.447973713                   | 0.026792908                                   |
| 0.006381131                                      | 679.1849802                          | 1165.275099                            | 0.409385113                   | 0.03075505                                    |
| 0.010300713                                      | 786.5397022                          | 766.9925558                            | 0.295129989                   | 0.026279332                                   |
| 0.026371643                                      | 492.1889764                          | 115.5669291                            | 0.585253456                   | 0.032500665                                   |
| 0.013800391                                      | 711.3559097                          | 657.9083665                            | 0.484867997                   | 0.025038403                                   |
| 0.01126149                                       | 522.1557377                          | 177.1147541                            | 0.61928934                    | 0.032585327                                   |
| 0.007152526                                      | 643.1857233                          | 1469.397979                            | 0.495151705                   | 0.027051078                                   |
| 0.035435103                                      | 346.5163636                          | 236.2072727                            | 0.616591928                   | 0.033626446                                   |
| 0.007686993                                      | 680.0193089                          | 871.3170732                            | 0.489308802                   | 0.027348139                                   |
| 0.007676817                                      | 743.6354234                          | 1368.667744                            | 0.508881579                   | 0.024935975                                   |
| 0.011334901                                      | 508.8965517                          | 561.0525452                            | 0.539415412                   | 0.028189635                                   |
| 0.007912569                                      | 592.3454198                          | 1910.978053                            | 0.405572755                   | 0.028613663                                   |
| 0.007574152                                      | 678.4566228                          | 2455.272657                            | 0.384455033                   | 0.028935051                                   |
| 0.00474026                                       | 1140.700984                          | 3672.506939                            | 0.431699346                   | 0.02186316                                    |
| 0.009362712                                      | 667.2582026                          | 544.1098431                            | 0.628136201                   | 0.024857499                                   |
| 0.013965663                                      | 498.5876289                          | 558.2223859                            | 0.607878245                   | 0.029144913                                   |
| 0.011018266                                      | 498.4213483                          | 318.247191                             | 0.583606557                   | 0.030299205                                   |
| 0.009361553                                      | 652.8747475                          | 816.6181818                            | 0.56122449                    | 0.025679012                                   |
| 0.006335008                                      | 620.0273349                          | 1102.145027                            | 0.462754743                   | 0.029803014                                   |
| 0.009268525                                      | 883.6629213                          | 289.6910112                            | 0.706349206                   | 0.021793334                                   |
| 0.007788292                                      | 755.0535519                          | 722.9693989                            | 0.682326622                   | 0.023617307                                   |
| 0.014357466                                      | 869.1736205                          | 1299.45895                             | 0.532234957                   | 0.023379265                                   |
| 0.033987444                                      | 277.373494                           | 57.1686747                             | 0.572413793                   | 0.045434751                                   |
| 0.009606175                                      | 548.8329341                          | 1578.645509                            | 0.492480094                   | 0.030403385                                   |
| 0.007053524                                      | 859.3497717                          | 1601.872146                            | 0.399926954                   | 0.027888076                                   |
| 0.012076168                                      | 523.6945701                          | 396.6063348                            | 0.568123393                   | 0.029268442                                   |
| 0.010098884                                      | 547.4097826                          | 720.2521739                            | 0.592783505                   | 0.028388469                                   |
| 0.033972762                                      | 524.8933333                          | 57.6666667                             | 0.409836066                   | 0.045688889                                   |
| 0.039299413                                      | 308.2608696                          | 50.50724638                            | 0.657142857                   | 0.043058181                                   |
| 0.010706756                                      | 786.3172012                          | 1502.155685                            | 0.431446541                   | 0.02365987                                    |
| 0.00891066                                       | 1020.04038                           | 403.3847981                            | 0.59631728                    | 0.021896739                                   |
| 0.013439997                                      | 597.776824                           | 401.2575107                            | 0.455966889                   | 0.027675956                                   |
| 0.003839639                                      | 860.6190214                          | 1626.439252                            | 0.444743276                   | 0.026014269                                   |
| 0.003983339                                      | 764.0394525                          | 2253.788245                            | 0.427833276                   | 0.029215968                                   |
| 0.01939671                                       | 871.775                              | 119.2                                  | 0.632411067                   | 0.0240625                                     |
| 0.011467734                                      | 644.8423493                          | 598.9319938                            | 0.532072368                   | 0.026327671                                   |
| 0.053925689                                      | 315.6419753                          | 66.58024691                            | 0.658536585                   | 0.03947569                                    |
| 0.027214041                                      | 253.6165049                          | 154.7378641                            | 0.54353562                    | 0.039494769                                   |
| 0.007707823                                      | 1065.510695                          | 356.4331551                            | 0.463444857                   | 0.026566387                                   |

| original_gldzm_LowIntensitySmallDistanceEmphasis | original_gldzm_IntensityVariability | original_gldzm_HighIntensityLargeDistanceEmphasis | original_gldzm_SmallDistanceEmphasis | original_gldcm_SumVariance |
|--------------------------------------------------|-------------------------------------|---------------------------------------------------|--------------------------------------|----------------------------|
| 0.006623624                                      | 10.81675393                         | 968.7853403                                       | 0.939136126                          | 3293.385824                |
| 0.010645699                                      | 20.92328042                         | 826.5820106                                       | 0.944444444                          | 3288.885071                |
| 0.008470997                                      | 7.12749004                          | 958.2749004                                       | 0.952191235                          | 3293.37354                 |
| 0.008332881                                      | 33.6052076                          | 992.8564391                                       | 0.927163969                          | 2954.569759                |
| 0.023598772                                      | 8.013333333                         | 456.6177778                                       | 0.936666667                          | 1008.118281                |
| 0.012508005                                      | 12.46928747                         | 633.039312                                        | 0.937346437                          | 1692.749511                |
| 0.026333333                                      | 8.012048193                         | 495.439759                                        | 0.810240964                          | 390.4128551                |
| 0.021078521                                      | 17.10726644                         | 721.4273356                                       | 0.922145329                          | 1854.57777                 |
| 0.006425259                                      | 29.48188406                         | 928.990942                                        | 0.959918478                          | 2995.086428                |
| 0.004548906                                      | 40.0491573                          | 974.4339888                                       | 0.978405899                          | 3756.188104                |
| 0.012932853                                      | 15.16521739                         | 565.0130435                                       | 0.929891304                          | 1594.098522                |
| 0.005629322                                      | 17.15211268                         | 1183.632394                                       | 0.955633803                          | 4035.745131                |
| 0.011712388                                      | 34.76532399                         | 525.9676007                                       | 0.961252189                          | 1555.306937                |
| 0.009771951                                      | 20.68                               | 585.5851852                                       | 0.948888889                          | 1668.304394                |
| 0.007158461                                      | 15.57446809                         | 814.0531915                                       | 0.925531915                          | 1815.193177                |
| 0.005188736                                      | 53.04021289                         | 1052.000591                                       | 0.960082791                          | 4452.459524                |
| 0.011952209                                      | 12.62264151                         | 807.2051887                                       | 0.883254717                          | 1676.377857                |
| 0.008465323                                      | 31.08687943                         | 670.2287234                                       | 0.984042553                          | 2713.392657                |
| 0.022248148                                      | 11.02849003                         | 607.2706553                                       | 0.905982906                          | 1372.126574                |
| 0.006156446                                      | 32.61489555                         | 705.0036331                                       | 0.973433243                          | 3046.530001                |
| 0.004007825                                      | 70.48529412                         | 859.0404412                                       | 0.951401654                          | 3289.490601                |
| 0.002408584                                      | 30.85066163                         | 1252.272212                                       | 0.927693762                          | 3402.978329                |
| 0.006650689                                      | 41.6808188                          | 679.1683093                                       | 0.968157695                          | 2571.850609                |
| 0.015164112                                      | 8.166077739                         | 972.2367491                                       | 0.835689046                          | 1542.433819                |
| 0.004050889                                      | 18.83892617                         | 1099.221477                                       | 0.954697987                          | 3885.978072                |
| 0.023407023                                      | 10.16111111                         | 689.0833333                                       | 0.977083333                          | 2589.118152                |
| 0.007028143                                      | 36.86698337                         | 815.0166271                                       | 0.947149644                          | 2770.252127                |
| 0.00898539                                       | 20.54142012                         | 731.0428994                                       | 0.980029586                          | 3090.009377                |
| 0.014198093                                      | 26.78802748                         | 694.3179588                                       | 0.965407262                          | 1996.500397                |
| 0.007307998                                      | 26.13655462                         | 884.7027311                                       | 0.96769958                           | 4010.023716                |
| 0.005813753                                      | 43.58556701                         | 753.1656357                                       | 0.981443299                          | 3128.986085                |
| 0.003504333                                      | 78.86023413                         | 884.8637815                                       | 0.973926924                          | 3233.011897                |
| 0.011205811                                      | 25.22649141                         | 794.0556117                                       | 0.957532861                          | 2714.512867                |
| 0.048451607                                      | 3.461538462                         | 541.9230769                                       | 0.884615385                          | 558.831397                 |
| 0.011996997                                      | 6.125581395                         | 923.2604651                                       | 0.909302326                          | 2166.54574                 |
| 0.008842484                                      | 30.59306569                         | 723.9051095                                       | 0.925410584                          | 1986.456852                |
| 0.006875574                                      | 31.96111975                         | 907.7628305                                       | 0.974922224                          | 3982.50475                 |
| 0.006229657                                      | 45.76616314                         | 780.7347432                                       | 0.960574018                          | 2718.380865                |
| 0.013611113                                      | 13.88552916                         | 732.812095                                        | 0.906047516                          | 1537.875307                |
| 0.038010358                                      | 14.80863039                         | 598.8836773                                       | 0.962007505                          | 2155.401816                |
| 0.006936282                                      | 14.74757282                         | 1271.281553                                       | 0.921116505                          | 4108.617915                |
| 0.011593229                                      | 17.59115044                         | 632.1610619                                       | 0.932300885                          | 1704.188142                |
| 0.00639662                                       | 26.49568966                         | 800.40625                                         | 0.943426724                          | 2065.516791                |
| 0.023177003                                      | 17.47504303                         | 649.141136                                        | 0.92383821                           | 1462.219546                |
| 0.00599399                                       | 32.51016949                         | 771.1932203                                       | 0.941525424                          | 1857.90731                 |
| 0.008441616                                      | 33.08102767                         | 551.5938735                                       | 0.988883399                          | 2423.395014                |
| 0.003130827                                      | 57.04104803                         | 1256.317467                                       | 0.91779476                           | 3428.936916                |
| 0.012023744                                      | 10.76470588                         | 672.7030812                                       | 0.955882353                          | 2156.128799                |
| 0.09085927                                       | 4.195121951                         | 575.1097561                                       | 0.862804878                          | 657.5369703                |
| 0.015928229                                      | 9.705882353                         | 795.8961938                                       | 0.888408304                          | 1557.056819                |
| 0.00808115                                       | 47.73264937                         | 653.3952927                                       | 0.967863609                          | 2336.807437                |
| 0.020799591                                      | 13.94977169                         | 563.2100457                                       | 0.957191781                          | 1897.643422                |
| 0.014145876                                      | 43.89582034                         | 715.3792888                                       | 0.958359326                          | 2645.819988                |
| 0.009030195                                      | 10.28125                            | 731.3375                                          | 0.9390625                            | 2127.637552                |
| 0.007628362                                      | 58.78723404                         | 849.9473151                                       | 0.9806231                            | 3696.542845                |
| 0.03048682                                       | 12.70676692                         | 922.112782                                        | 0.919642857                          | 2554.624696                |
| 0.006894896                                      | 31.55485893                         | 1278.302508                                       | 0.871865204                          | 2627.602801                |
| 0.023762955                                      | 22.45257453                         | 892.4742547                                       | 0.851626016                          | 1091.06894                 |
| 0.00843451                                       | 10.70120482                         | 997.5879518                                       | 0.934939759                          | 3249.24448                 |
| 0.005420872                                      | 15.39004149                         | 798.0414938                                       | 0.978215768                          | 2620.906254                |
| 0.007798335                                      | 30.90149516                         | 742.6824978                                       | 0.966358839                          | 2639.43521                 |
| 0.005199821                                      | 65.74979625                         | 838.091687                                        | 0.959657702                          | 3076.725749                |
| 0.006100324                                      | 38.90513834                         | 764.8403162                                       | 0.96916996                           | 2763.430726                |
| 0.010199981                                      | 21.18114144                         | 858.4354839                                       | 0.981389578                          | 3030.821794                |
| 0.026177857                                      | 4.133858268                         | 622.8661417                                       | 0.964566929                          | 2050.625035                |
| 0.01201559                                       | 18.85391766                         | 865.7224436                                       | 0.949203187                          | 3009.425196                |
| 0.010455819                                      | 7.950819672                         | 1037.688525                                       | 0.87704918                           | 1901.154127                |
| 0.006932414                                      | 42.82185723                         | 743.1295009                                       | 0.972046747                          | 2901.129323                |
| 0.034957301                                      | 9.247272727                         | 512.2690909                                       | 0.942727273                          | 1562.552029                |
| 0.007311392                                      | 26.91056911                         | 839.0833333                                       | 0.954268293                          | 2895.428887                |
| 0.007350138                                      | 38.57595346                         | 917.018746                                        | 0.953943116                          | 3028.269396                |
| 0.011073351                                      | 17.16748768                         | 604.1724138                                       | 0.969211823                          | 2208.770158                |
| 0.007608198                                      | 59.97423664                         | 697.5987595                                       | 0.965291031                          | 2893.9404                  |
| 0.007440112                                      | 74.71030209                         | 747.0580945                                       | 0.981119287                          | 3243.116839                |
| 0.004334481                                      | 86.64370426                         | 1228.625284                                       | 0.971423164                          | 4349.006474                |
| 0.008646689                                      | 17.42510699                         | 1058.071327                                       | 0.903708987                          | 2281.649739                |
| 0.013209278                                      | 19.78939617                         | 729.7599411                                       | 0.925994109                          | 1914.015779                |
| 0.010658497                                      | 10.78651685                         | 621.3539326                                       | 0.957865169                          | 2202.842994                |
| 0.008958659                                      | 25.42222222                         | 967.8565657                                       | 0.927272727                          | 2736.977555                |
| 0.0058145                                        | 39.25056948                         | 845.7266515                                       | 0.932801822                          | 2813.794277                |
| 0.008956543                                      | 7.758426966                         | 1327.308989                                       | 0.922050562                          | 3540.74737                 |
| 0.006634751                                      | 21.60983607                         | 1086.355191                                       | 0.910655738                          | 2513.08031                 |
| 0.013377911                                      | 34.74158816                         | 977.5107672                                       | 0.949528937                          | 3165.710761                |
| 0.032762904                                      | 3.771084337                         | 710.7108434                                       | 0.855421687                          | 760.3098945                |
| 0.00942834                                       | 50.77365269                         | 608.3784431                                       | 0.978892216                          | 2232.213641                |
| 0.002650701                                      | 61.07488584                         | 1227.729224                                       | 0.880136986                          | 3522.875642                |
| 0.011744077                                      | 12.93665158                         | 642.8461538                                       | 0.959276018                          | 2387.892616                |
| 0.009506                                         | 26.1173913                          | 913.775                                           | 0.907065217                          | 2104.383987                |
| 0.032746444                                      | 3.426666667                         | 772.5333333                                       | 0.9                                  | 2171.905093                |
| 0.037797544                                      | 2.971014493                         | 596.6956522                                       | 0.880434783                          | 771.906961                 |
| 0.010260333                                      | 40.57667338                         | 951.8227405                                       | 0.950145773                          | 2977.630368                |
| 0.008860451                                      | 9.218527316                         | 1129.964371                                       | 0.983966746                          | 4489.526239                |
| 0.01272586                                       | 12.89699571                         | 749.1158798                                       | 0.943669528                          | 2794.707266                |
| 0.00357834                                       | 47.31995602                         | 1025.564596                                       | 0.957943925                          | 3569.40643                 |
| 0.003709492                                      | 72.57246377                         | 894.599839                                        | 0.963466184                          | 3424.458512                |
| 0.018958364                                      | 3.85                                | 1528.85                                           | 0.8875                               | 3360.918785                |
| 0.010781261                                      | 17.03400309                         | 686.9119011                                       | 0.971020093                          | 1900.427308                |
| 0.053415385                                      | 3.197530864                         | 564.382716                                        | 0.925925926                          | 1091.409987                |
| 0.02463253                                       | 8.13592233                          | 405.4660194                                       | 0.890776699                          | 620.4223672                |
| 0.007656037                                      | 9.935828877                         | 1194.245989                                       | 0.981951872                          | 4915.268024                |







| original_glm_DifferenceAverage | original_glm_Id | original_glm_ClusterTendency | original_glm_OrderQuartileRange | original_glm_Skewness | original_glm_Uniformity | original_glm_MeanAbsoluteDeviation |
|--------------------------------|-----------------|------------------------------|---------------------------------|-----------------------|-------------------------|------------------------------------|
| 9.731762982                    | 0.26493643      | 427.6670081                  | 646.25                          | -0.250933633          | 0.059076792             | 290.6760748                        |
| 6.997604084                    | 0.346384008     | 416.3504437                  | 469                             | -0.946755781          | 0.074975504             | 262.2572907                        |
| 9.102404058                    | 0.239036645     | 321.7784289                  | 479.25                          | -0.58242919           | 0.040667672             | 243.2868398                        |
| 10.4107369                     | 0.227853214     | 574.6568148                  | 722.5                           | -0.12373555           | 0.039984733             | 327.0295881                        |
| 8.337680707                    | 0.205137601     | 257.6725044                  | 334.5                           | 0.736232382           | 0.037117554             | 193.4545356                        |
| 8.772958467                    | 0.201274068     | 285.127338                   | 456.5                           | 0.136164694           | 0.029732809             | 224.1757944                        |
| 6.125057517                    | 0.273072985     | 96.84768274                  | 164                             | 1.371704361           | 0.070521005             | 111.610281                         |
| 11.09073567                    | 0.206776942     | 450.2239657                  | 679                             | 0.166559693           | 0.035661213             | 298.0227708                        |
| 8.87299852                     | 0.22823698      | 388.4241671                  | 566.5                           | -0.245515532          | 0.033154329             | 266.3954699                        |
| 7.531373059                    | 0.287730756     | 299.1433299                  | 390.75                          | -0.726361087          | 0.060051238             | 220.4318203                        |
| 9.350610051                    | 0.20896705      | 304.7943692                  | 475                             | 0.3519083             | 0.03474191              | 232.8791                           |
| 8.379335568                    | 0.271394975     | 406.9801293                  | 473.5                           | -0.362463377          | 0.051505151             | 258.6648855                        |
| 7.615048507                    | 0.225756137     | 273.7195253                  | 433.75                          | 0.129655814           | 0.03021056              | 214.8215138                        |
| 7.971404907                    | 0.214941589     | 283.7300252                  | 455                             | 0.014390202           | 0.02993622              | 221.8771829                        |
| 8.608984528                    | 0.200532909     | 282.7997334                  | 421.5                           | 0.259654457           | 0.029028064             | 222.0013664                        |
| 4.836233757                    | 0.435270127     | 358.9236587                  | 165                             | -1.738677761          | 0.129665439             | 190.4709685                        |
| 9.240480248                    | 0.196423034     | 336.6152644                  | 501.75                          | 0.329068412           | 0.029884812             | 239.77868                          |
| 8.503440798                    | 0.2582371       | 432.7296336                  | 623                             | -0.337480326          | 0.043294281             | 284.8067251                        |
| 9.325525578                    | 0.201032655     | 334.2340002                  | 450.25                          | 0.463770059           | 0.031441528             | 232.6781805                        |
| 6.35243532                     | 0.361131627     | 332.6237142                  | 453                             | -0.80227672           | 0.094954995             | 235.3029477                        |
| 6.698601834                    | 0.334842058     | 229.4541128                  | 363.25                          | -0.958456548          | 0.100326066             | 200.2977419                        |
| 8.442340669                    | 0.207764074     | 279.7895047                  | 443                             | -0.220502741          | 0.0305841               | 217.5767523                        |
| 7.536277526                    | 0.27541118      | 269.5344934                  | 438                             | -0.606016209          | 0.055573202             | 220.4149554                        |
| 9.61207985                     | 0.210062856     | 464.9745107                  | 512                             | 0.627259454           | 0.032939865             | 271.3077226                        |
| 7.274773235                    | 0.27444111      | 224.1345228                  | 355.25                          | -0.920034155          | 0.054818655             | 197.3478328                        |
| 9.243875205                    | 0.263918229     | 395.5441372                  | 596.5                           | -0.520892185          | 0.049514571             | 279.5140064                        |
| 5.875739132                    | 0.335120992     | 255.7588353                  | 280                             | -0.809516624          | 0.080510234             | 187.9469761                        |
| 7.840850512                    | 0.285961127     | 278.8920666                  | 385                             | -0.96811916           | 0.063560603             | 222.7402893                        |
| 11.19061062                    | 0.215015205     | 524.0010758                  | 709                             | 0.243235094           | 0.034688024             | 319.8678747                        |
| 7.045987435                    | 0.352145759     | 384.8397296                  | 382                             | -1.158117738          | 0.089688512             | 246.6071144                        |
| 7.736628331                    | 0.282957864     | 264.2895189                  | 398                             | -0.892829791          | 0.068534751             | 215.82688                          |
| 6.921027623                    | 0.274390821     | 335.2868925                  | 478                             | -0.573492017          | 0.04667899              | 236.2101215                        |
| 9.706006563                    | 0.256558734     | 576.4882303                  | 717                             | -0.160219846          | 0.050736628             | 325.3031541                        |
| 9.792605815                    | 0.207080307     | 196.4159935                  | 247.25                          | 1.386935406           | 0.070821006             | 161.977071                         |
| 11.14468572                    | 0.188562636     | 401.5358134                  | 548.75                          | 0.31763828            | 0.031481347             | 268.9469988                        |
| 9.32799308                     | 0.220611415     | 415.1460504                  | 615.25                          | 0.174179779           | 0.033889325             | 274.0748554                        |
| 9.282838635                    | 0.307979571     | 528.3894546                  | 619.25                          | -0.686149234          | 0.089819155             | 309.9682369                        |
| 7.633020137                    | 0.261558675     | 347.161603                   | 484                             | -0.361152918          | 0.046506116             | 242.4481766                        |
| 8.252998885                    | 0.217573797     | 308.815696                   | 449                             | 0.408369775           | 0.031345692             | 224.8421241                        |
| 9.519671626                    | 0.258940592     | 471.7677671                  | 654                             | -0.146122117          | 0.059528299             | 304.2397362                        |
| 7.123103938                    | 0.329245464     | 443.8287425                  | 508.75                          | -0.746373389          | 0.075677183             | 270.3683844                        |
| 9.558927245                    | 0.209155163     | 366.7673892                  | 547                             | 0.338625725           | 0.035116366             | 256.7647249                        |
| 10.05051076                    | 0.208886215     | 389.5232252                  | 590.25                          | 0.292592659           | 0.033230174             | 272.4830181                        |
| 10.16590448                    | 0.213415862     | 400.2853428                  | 606                             | 0.327775799           | 0.03505818              | 272.9519838                        |
| 9.24481433                     | 0.193175197     | 311.1524666                  | 485                             | 0.289442147           | 0.028987061             | 238.0029125                        |
| 6.956172836                    | 0.29504628      | 227.5620908                  | 403.25                          | -0.738218792          | 0.062404714             | 207.9554261                        |
| 8.787163446                    | 0.2309523       | 402.6761643                  | 554                             | -0.098505613          | 0.032419688             | 264.3214831                        |
| 10.01314959                    | 0.209898993     | 385.2195571                  | 585                             | 0.107212379           | 0.034055236             | 268.691667                         |
| 9.140151057                    | 0.216211807     | 247.5171132                  | 206.25                          | 1.463507188           | 0.057473825             | 165.6089329                        |
| 9.734452575                    | 0.208180675     | 359.9605633                  | 417                             | 0.770054066           | 0.040536984             | 237.5212725                        |
| 7.9318212                      | 0.265097849     | 358.7141587                  | 532.25                          | -0.43738966           | 0.047609405             | 255.6834817                        |
| 10.65547155                    | 0.227832937     | 461.1324397                  | 713.5                           | 0.169064394           | 0.045576368             | 306.3592507                        |
| 8.400228707                    | 0.293087138     | 459.5562992                  | 599                             | -0.437621972          | 0.066723854             | 290.2968594                        |
| 7.316792222                    | 0.247474155     | 271.5407574                  | 444.5                           | -0.23871613           | 0.036941603             | 215.5352281                        |
| 6.378680489                    | 0.389518064     | 424.4621499                  | 261.5                           | -1.382794912          | 0.122012091             | 231.3953939                        |
| 11.54340025                    | 0.206711881     | 622.9678322                  | 737.5                           | -0.031370396          | 0.030087712             | 334.1369303                        |
| 11.0399962                     | 0.196257823     | 470.7805506                  | 671                             | 0.145244884           | 0.028632121             | 300.3792754                        |
| 9.893353978                    | 0.203969397     | 355.6638773                  | 360                             | 1.065120535           | 0.0388821               | 225.1143375                        |
| 8.456465784                    | 0.260645675     | 474.7905706                  | 624                             | -0.341233081          | 0.03859969              | 295.3490392                        |
| 7.087187201                    | 0.235373524     | 240.3169053                  | 378                             | 0.050737336           | 0.03663544              | 196.2501311                        |
| 9.628798284                    | 0.228554587     | 384.7767382                  | 603                             | -0.214343623          | 0.039186791             | 277.9224019                        |
| 8.95173587                     | 0.287032666     | 536.3466614                  | 686                             | -0.297014204          | 0.069484416             | 314.0237673                        |
| 6.491053047                    | 0.304692176     | 286.8589418                  | 367                             | -0.824508516          | 0.06523811              | 209.0320558                        |
| 5.870688003                    | 0.401188589     | 339.6937327                  | 138                             | -0.971188565          | 0.108256895             | 198.10208978                       |
| 8.607349919                    | 0.24333019      | 349.95995                    | 561                             | -0.17124809           | 0.039011234             | 261.1349147                        |
| 8.775676264                    | 0.261398566     | 584.0723526                  | 670                             | -0.357394026          | 0.043016259             | 321.0413362                        |
| 10.52262711                    | 0.187797031     | 317.703981                   | 431.75                          | 0.563519358           | 0.039869692             | 230.4189492                        |
| 9.421339198                    | 0.259283588     | 493.7789127                  | 676                             | -0.301853443          | 0.054268796             | 307.7442144                        |
| 9.888289068                    | 0.20182603      | 363.9769761                  | 546                             | 0.303175952           | 0.035019807             | 258.5849504                        |
| 9.601939854                    | 0.250820158     | 449.2345381                  | 645                             | -0.376368566          | 0.052812218             | 294.7048627                        |
| 8.95685222                     | 0.240356097     | 420.6935119                  | 555.25                          | -0.55050523           | 0.039821243             | 274.5562574                        |
| 9.399348626                    | 0.228000268     | 386.4406019                  | 614                             | -0.021122265          | 0.035069482             | 273.6612599                        |
| 7.451505967                    | 0.322351268     | 354.3594932                  | 472                             | -0.787136585          | 0.085564506             | 248.0926073                        |
| 6.909438061                    | 0.326264371     | 331.2747198                  | 364                             | -1.113259391          | 0.082594311             | 225.2766593                        |
| 6.672115401                    | 0.299702454     | 490.6926426                  | 400.25                          | -0.82880063           | 0.05234098              | 252.4994412                        |
| 11.18868667                    | 0.185209576     | 467.9624483                  | 626.25                          | 0.27142808            | 0.027390771             | 295.2518114                        |
| 9.439042599                    | 0.206865503     | 361.4108629                  | 565                             | 0.049429584           | 0.030141325             | 262.9897579                        |
| 9.612713491                    | 0.218844009     | 321.430718                   | 562.5                           | -0.145138344          | 0.037678044             | 252.688014                         |
| 9.886636879                    | 0.21940364      | 427.2216108                  | 632                             | -0.264431326          | 0.034296409             | 286.5928445                        |
| 8.785950875                    | 0.279822833     | 382.0511841                  | 595                             | -0.354272347          | 0.061028066             | 272.8400645                        |
| 11.92948324                    | 0.175136164     | 596.418495                   | 719.75                          | -0.001809339          | 0.023833144             | 336.9827176                        |
| 11.82382264                    | 0.173825141     | 486.3459321                  | 623                             | 0.274637115           | 0.025250225             | 297.3881957                        |
| 10.52262981                    | 0.234620921     | 717.8212169                  | 759.25                          | -0.350169311          | 0.045389354             | 359.7016381                        |
| 8.436801942                    | 0.230314161     | 224.9858155                  | 169                             | 1.247565262           | 0.056551724             | 163.4138407                        |
| 7.942075927                    | 0.256784629     | 282.0216456                  | 471                             | -0.493881694          | 0.047652724             | 229.8567655                        |
| 6.176729109                    | 0.31244769      | 339.4057757                  | 419                             | -0.595696152          | 0.058083657             | 226.8039029                        |
| 9.223050242                    | 0.231053874     | 333.9212267                  | 569.75                          | -0.132619769          | 0.040232354             | 253.8047925                        |
| 10.76338225                    | 0.194467205     | 473.9087286                  | 609.5                           | 0.437042343           | 0.031150361             | 287.3428267                        |
| 6.959756978                    | 0.339717362     | 421.7398337                  | 610                             | -0.3035797            | 0.076592314             | 286.809639                         |
| 10.47077236                    | 0.20110795      | 211.7175427                  | 336                             | 1.021367348           | 0.069569161             | 194.4903401                        |
| 8.547733098                    | 0.285927652     | 505.2311115                  | 574.5                           | -0.432147932          | 0.056262268             | 288.9679302                        |
| 10.78137816                    | 0.22097443      | 485.5766261                  | 607.5                           | -0.478081126          | 0.032917777             | 309.4512114                        |
| 7.891144509                    | 0.287181863     | 439.8456869                  | 581                             | -0.525583863          | 0.049124735             | 278.0927769                        |
| 7.683344188                    | 0.288546204     | 380.0506708                  | 487.5                           | -0.49888389           | 0.059404116             | 253.9754444                        |
| 6.769065091                    | 0.294969391     | 294.2841643                  | 395.75                          | -0.74376778           | 0.063793925             | 222.141432                         |
| 12.36039551                    | 0.201045108     | 644.6094614                  | 758                             | -0.0042535            | 0.029011545             | 356.0236529                        |
| 8.609153104                    | 0.236083793     | 544.3683513                  | 633                             | 0.727717538           | 0.033932165             | 296.5435409                        |
| 10.24512001                    | 0.201558925     | 314.0504131                  | 401.5                           | 0.726917058           | 0.046995836             | 232.8784454                        |
| 6.443708072                    | 0.247132732     | 158.7199537                  | 288                             | 0.660711789           | 0.045300437             | 155.1775468                        |
| 7.824231682                    | 0.291566375     | 324.5296303                  | 312.5                           | -1.263128331          | 0.049945566             | 232.9842318                        |

| original_firstorder_Energy | original_firstorder_RobustMeanAbsoluteDeviation | original_firstorder_Median | original_firstorder_TotalEnergy | original_firstorder_Maximum | original_firstorder_RootMeanSquared |
|----------------------------|-------------------------------------------------|----------------------------|---------------------------------|-----------------------------|-------------------------------------|
| 141563586                  | 255.3899786                                     | -273                       | 3822216822                      | 67                          | 447.7890065                         |
| 283494146                  | 204.1223408                                     | -54                        | 7654341942                      | 371                         | 369.448408                          |
| 62558705                   | 196.543153                                      | -169.5                     | 1689085035                      | 82                          | 379.6636427                         |
| 670240668                  | 284.9501878                                     | -323                       | 18096498036                     | 915                         | 504.3419324                         |
| 107707820                  | 140.8316478                                     | -558                       | 2908111140                      | 91                          | 547.742442                          |
| 137342084                  | 181.5541116                                     | -401                       | 3708236268                      | 69                          | 462.1642306                         |
| 156064590                  | 72.17379528                                     | -713                       | 4213743930                      | -45                         | 680.5142714                         |
| 278598917                  | 260.6737708                                     | -455                       | 7522170759                      | 90                          | 527.2976686                         |
| 388648815                  | 224.2751216                                     | -253                       | 10493518005                     | 638                         | 432.3658948                         |
| 325393198                  | 163.3801823                                     | -81                        | 8785616346                      | 849                         | 324.0884311                         |
| 196353857                  | 189.2470534                                     | -452                       | 5301554139                      | 65                          | 487.2669592                         |
| 195034836                  | 199.1353152                                     | -72                        | 5265940572                      | 945                         | 362.7705245                         |
| 396329681                  | 172.8607817                                     | -386                       | 10700901387                     | 80                          | 437.143397                          |
| 203959111                  | 181.3245274                                     | -355                       | 5506895997                      | 106                         | 427.1207332                         |
| 233689845                  | 173.8384312                                     | -482                       | 6309625815                      | 188                         | 506.4781705                         |
| 514262102                  | 106.3868104                                     | 22                         | 13885076754                     | 356                         | 272.0781155                         |
| 178597242                  | 194.6405557                                     | -480                       | 4822125534                      | 108                         | 505.8359163                         |
| 417678602                  | 247.2639818                                     | -190.5                     | 11277322254                     | 334                         | 423.2108957                         |
| 165525694                  | 182.907274                                      | -515                       | 4469193738                      | 94                          | 533.299549                          |
| 300714600                  | 189.9478803                                     | -44                        | 8119294200                      | 163                         | 327.6579446                         |
| 418487877                  | 154.7753593                                     | -45                        | 11299172679                     | 95                          | 283.034813                          |
| 270630678                  | 173.5675987                                     | -294                       | 7307028306                      | 165                         | 396.6653721                         |
| 312885343                  | 179.2104768                                     | -153                       | 8447904261                      | 142                         | 338.4790236                         |
| 206031196                  | 213.3775672                                     | -671                       | 5562842292                      | 58                          | 654.476344                          |
| 99668830                   | 149.3648522                                     | -70.5                      | 2691058410                      | 131                         | 287.7176051                         |
| 112050038                  | 236.5993444                                     | -133.5                     | 3025351026                      | 188                         | 401.8151144                         |
| 233280650                  | 128.6091879                                     | -8                         | 6298577550                      | 795                         | 259.4329172                         |
| 155614634                  | 168.0239637                                     | -82                        | 4201595118                      | 112                         | 329.5354361                         |
| 613906933                  | 279.3315681                                     | -557                       | 16575487191                     | 85                          | 589.7648895                         |
| 299373559                  | 179.6669154                                     | -15.5                      | 8083086093                      | 113                         | 343.1776114                         |
| 303209607                  | 167.6301484                                     | -69                        | 8186659389                      | 101                         | 308.8347882                         |
| 766415542                  | 192.68217                                       | -160                       | 20693219634                     | 278                         | 359.5048923                         |
| 463359831                  | 285.4965113                                     | -245                       | 12510715437                     | 765                         | 477.4088896                         |
| 44879597                   | 106.1811422                                     | -701.5                     | 1211749119                      | 29                          | 656.9129216                         |
| 99699769                   | 220.0339761                                     | -534                       | 2691893763                      | 123                         | 547.9968148                         |
| 538077967                  | 233.3100007                                     | -450                       | 14528105109                     | 81                          | 516.1155212                         |
| 534444255                  | 258.8824303                                     | -48                        | 14429994885                     | 470                         | 430.7794353                         |
| 441223608                  | 196.2815344                                     | -162                       | 11913037416                     | 944                         | 362.7002389                         |
| 225974555                  | 177.7087363                                     | -505                       | 6101312985                      | 77                          | 520.219386                          |
| 208305520                  | 264.889406                                      | -231                       | 5624249040                      | 730                         | 445.617918                          |
| 198014156                  | 211.1223184                                     | -23                        | 5346382212                      | 514                         | 366.5214346                         |
| 248034282                  | 214.6890095                                     | -494                       | 6696925614                      | 80                          | 510.1635254                         |
| 452000138                  | 232.0047835                                     | -495                       | 12204003726                     | 101                         | 524.6657413                         |
| 296041179                  | 232.9322282                                     | -510                       | 7993111833                      | 286                         | 537.4203778                         |
| 495370900                  | 193.48418                                       | -477.5                     | 13375014300                     | 130                         | 513.5910553                         |
| 177280204                  | 167.5621521                                     | -42                        | 4786565508                      | 180                         | 282.0801515                         |
| 652965068                  | 217.9458306                                     | -219                       | 17630056836                     | 1030                        | 391.2321611                         |
| 136616024                  | 227.4006248                                     | -417                       | 3688632648                      | 87                          | 484.0793352                         |
| 60841801                   | 100.2680669                                     | -711                       | 1642728627                      | 34                          | 673.8273451                         |
| 173382144                  | 182.1883033                                     | -628                       | 4681317888                      | 109                         | 590.6415432                         |
| 508058977                  | 217.3740594                                     | -172                       | 13717592379                     | 233                         | 385.2034665                         |
| 230466233                  | 274.5767982                                     | -480                       | 6222588291                      | 84                          | 527.8990699                         |
| 612498469                  | 248.5412346                                     | -68                        | 16537458663                     | 953                         | 400.3722649                         |
| 79985993                   | 175.8228392                                     | -257                       | 2159621811                      | 325                         | 367.8859737                         |
| 644845087                  | 153.7022516                                     | 20                         | 17410817349                     | 406                         | 314.415544                          |
| 298889226                  | 287.5726749                                     | -456                       | 8070009102                      | 119                         | 583.1236997                         |
| 575060934                  | 257.1378208                                     | -438                       | 15526645218                     | 278                         | 512.0797673                         |
| 673873588                  | 157.876265                                      | -767                       | 18194586876                     | 138                         | 721.9214651                         |
| 129749089                  | 252.8616874                                     | -153.5                     | 3503225403                      | 401                         | 399.2454323                         |
| 84196012                   | 148.6692822                                     | -173                       | 2273292324                      | 965                         | 309.1418535                         |
| 346723845                  | 240.5642639                                     | -231                       | 9361543815                      | 204                         | 404.5073122                         |
| 1184574131                 | 278.8495447                                     | -242                       | 31983501537                     | 351                         | 465.0183685                         |
| 233817201                  | 160.2210316                                     | -3.5                       | 6313064427                      | 757                         | 275.0799831                         |
| 231006656                  | 116.5690621                                     | -14                        | 6237179712                      | 1345                        | 290.8381655                         |
| 37497095                   | 222.8161315                                     | -249                       | 1012421565                      | 249                         | 415.6893946                         |
| 360473801                  | 279.4053975                                     | -210                       | 9732792627                      | 180                         | 481.7826156                         |
| 124870597                  | 177.1438246                                     | -565.5                     | 3371506119                      | 89                          | 562.965762                          |
| 621149417                  | 271.7047705                                     | -201                       | 16771034259                     | 176                         | 440.7849146                         |
| 95422016                   | 219.4315687                                     | -449.5                     | 2576394432                      | 201                         | 462.5480608                         |
| 378976676                  | 257.6390901                                     | -192                       | 10232370252                     | 402                         | 434.1104155                         |
| 410277794                  | 227.7733855                                     | -73                        | 11077500438                     | 502                         | 367.368753                          |
| 217212193                  | 237.3967353                                     | -334                       | 5864729211                      | 134                         | 438.6267654                         |
| 631835252                  | 200.4816657                                     | -53                        | 17059551804                     | 491                         | 349.6557495                         |
| 662693690                  | 165.7722251                                     | -12                        | 17892729630                     | 225                         | 314.1239674                         |
| 1000299269                 | 180.1172789                                     | 13                         | 27008080263                     | 864                         | 330.098564                          |
| 314714397                  | 248.9222888                                     | -482                       | 8497288719                      | 233                         | 531.0387442                         |
| 258448519                  | 224.257541                                      | -394                       | 6978110013                      | 116                         | 481.0170133                         |
| 108054689                  | 216.4269105                                     | -291                       | 2917476603                      | 85                          | 420.8786457                         |
| 385672324                  | 243.347733                                      | -293                       | 10413152748                     | 138                         | 467.5843286                         |
| 479665514                  | 239.164259                                      | -208                       | 12950968878                     | 91                          | 410.5365231                         |
| 121350591                  | 281.2256875                                     | -319.5                     | 3276465957                      | 492                         | 490.6882739                         |
| 389055718                  | 247.1859037                                     | -487                       | 10504504386                     | 388                         | 538.6312077                         |
| 683631473                  | 314.9961298                                     | -173.5                     | 18458049771                     | 1311                        | 494.8269187                         |
| 481511665                  | 102.2697921                                     | -607                       | 1300081455                      | 34                          | 576.2612255                         |
| 352806661                  | 189.9887081                                     | -126                       | 9525779847                      | 256                         | 322.5555308                         |
| 560682818                  | 177.7369178                                     | -60                        | 15138436086                     | 988                         | 319.9829987                         |
| 124485411                  | 216.3192171                                     | -281.5                     | 3361106097                      | 136                         | 400.0086937                         |
| 488477204                  | 239.2564685                                     | -551.5                     | 13188884508                     | 143                         | 561.0173495                         |
| 35242681                   | 250.1598098                                     | -116                       | 951552387                       | 655                         | 438.8427466                         |
| 35715248                   | 141.8763246                                     | -653                       | 964311696                       | 80                          | 583.2197005                         |
| 613758640                  | 234.2476968                                     | -48                        | 16571483280                     | 1147                        | 392.943621                          |
| 117364146                  | 253.64497                                       | -64.5                      | 3168831942                      | 658                         | 407.7231501                         |
| 160279857                  | 235.3605699                                     | -107                       | 4327556139                      | 350                         | 396.0171785                         |
| 532521678                  | 202.7753019                                     | -85                        | 14378085306                     | 710                         | 360.8336172                         |
| 524172216                  | 172.3687032                                     | -27                        | 14152649832                     | 772                         | 300.4681776                         |
| 64588334                   | 308.3961783                                     | -302                       | 1743885018                      | 288                         | 505.2621673                         |
| 364111437                  | 243.8091235                                     | -544.5                     | 9831008799                      | 866                         | 547.2053979                         |
| 34294311                   | 181.96793                                       | -581                       | 925946397                       | 91                          | 528.0298633                         |
| 130603259                  | 116.2638504                                     | -589                       | 3526287993                      | -31                         | 587.026088                          |
| 75703893                   | 151.8702132                                     | 26                         | 2044005111                      | 249                         | 306.28261                           |



| original_firstorder_90Percentile | original_firstorder_Minimum | original_firstorder_Entropy | original_firstorder_StandardDeviation | original_firstorder_Range | original_firstorder_Variance | original_firstorder_10Percentile |
|----------------------------------|-----------------------------|-----------------------------|---------------------------------------|---------------------------|------------------------------|----------------------------------|
| 36                               | -1010                       | 4.783281649                 | 317.5808973                           | 1077                      | 100857.6263                  | -761                             |
| 39                               | -909                        | 4.528934022                 | 302.8763932                           | 1280                      | 91734.10955                  | -744.4                           |
| 45                               | -960                        | 4.983216645                 | 279.8724511                           | 1042                      | 78328.58889                  | -696.7                           |
| 44                               | -1006                       | 5.186235762                 | 359.0694001                           | 1921                      | 128930.8341                  | -838.6                           |
| -141.8                           | -828                        | 4.952250685                 | 234.4845288                           | 919                       | 54982.99423                  | -766.4                           |
| -8.2                             | -858                        | 5.130034376                 | 256.5204915                           | 927                       | 65802.76256                  | -720.8                           |
| -452                             | -880                        | 4.197924972                 | 144.6581409                           | 835                       | 20925.97774                  | -799.4                           |
| 39                               | -898                        | 5.049901371                 | 328.1875119                           | 988                       | 107707.043                   | -807.9                           |
| 30                               | -992                        | 5.157049995                 | 299.3308675                           | 1630                      | 89598.96824                  | -742                             |
| 43                               | -955                        | 4.790231854                 | 265.9046511                           | 1804                      | 70705.28346                  | -612.6                           |
| 20                               | -859                        | 5.012013588                 | 269.9023781                           | 924                       | 72847.2937                   | -725                             |
| 58                               | -977                        | 5.020458001                 | 306.2237595                           | 1922                      | 93772.99089                  | -659.9                           |
| -6                               | -844                        | 5.11067979                  | 247.1574732                           | 924                       | 61086.81658                  | -676                             |
| 5.3                              | -837                        | 5.12323724                  | 252.9057397                           | 943                       | 63961.31315                  | -682.3                           |
| -57                              | -954                        | 5.243027724                 | 257.9422379                           | 1142                      | 66534.19812                  | -756                             |
| 61                               | -967                        | 3.927356843                 | 252.2867804                           | 1323                      | 63648.61955                  | -582.4                           |
| -8.7                             | -883                        | 5.160668936                 | 275.5046683                           | 991                       | 75933.57169                  | -755.2                           |
| 49                               | -914                        | 4.991327009                 | 312.175695                            | 1248                      | 97453.66456                  | -733                             |
| -17.4                            | -872                        | 5.123488417                 | 271.1092283                           | 966                       | 73500.2137                   | -780                             |
| 46                               | -895                        | 4.435018937                 | 267.4681289                           | 1058                      | 71539.19996                  | -623                             |
| 44                               | -882                        | 4.313616057                 | 233.9121718                           | 977                       | 54714.90412                  | -536                             |
| 20                               | -1038                       | 5.169782438                 | 252.5427793                           | 1203                      | 63777.85535                  | -648.1                           |
| 35                               | -868                        | 4.744237175                 | 252.0225848                           | 1010                      | 63515.38327                  | -611                             |
| -25                              | -1015                       | 5.161417514                 | 316.142299                            | 1073                      | 99945.95319                  | -912                             |
| 50                               | -956                        | 4.692419135                 | 233.0129736                           | 1087                      | 54295.04587                  | -547.4                           |
| 55                               | -868                        | 4.908602341                 | 310.461409                            | 1056                      | 96386.28647                  | -735                             |
| 56                               | -784                        | 4.533362827                 | 233.5320556                           | 1579                      | 54537.22099                  | -511.5                           |
| 38                               | -881                        | 4.656590772                 | 263.7708976                           | 993                       | 69575.08644                  | -648                             |
| 26.6                             | -984                        | 5.135421646                 | 351.1787592                           | 1069                      | 123326.5209                  | -879                             |
| 51                               | -971                        | 4.399972035                 | 293.9514691                           | 1084                      | 86407.46617                  | -715.9                           |
| 52                               | -876                        | 4.599225951                 | 252.4315454                           | 977                       | 63721.68513                  | -584.2                           |
| 44                               | -965                        | 4.933647071                 | 269.6770682                           | 1243                      | 72725.72114                  | -654                             |
| 48                               | -929                        | 4.993701524                 | 355.6745878                           | 1694                      | 126504.4124                  | -811                             |
| -328                             | -829                        | 4.235864654                 | 205.7633732                           | 858                       | 42338.56574                  | -798.7                           |
| 15.9                             | -987                        | 5.189445364                 | 306.5694213                           | 1110                      | 93984.81009                  | -813.7                           |
| 27                               | -942                        | 5.11122507                  | 309.1271079                           | 1023                      | 95559.56881                  | -801                             |
| 44                               | -1032                       | 4.603805498                 | 346.0228557                           | 1502                      | 119731.8167                  | -806.1                           |
| 50                               | -897                        | 4.971509204                 | 279.5521546                           | 1841                      | 78149.40713                  | -656                             |
| -46.6                            | -909                        | 5.141117946                 | 260.6562863                           | 986                       | 67941.69959                  | -748.2                           |
| 41                               | -849                        | 4.831759191                 | 333.3882413                           | 1579                      | 111147.7194                  | -755.2                           |
| 49                               | -996                        | 4.738481109                 | 310.5476732                           | 1510                      | 96439.85732                  | -707.4                           |
| 23.8                             | -895                        | 5.040392263                 | 289.9717005                           | 975                       | 84083.58709                  | -756                             |
| 19.9                             | -959                        | 5.100414802                 | 303.9371534                           | 1060                      | 92377.7932                   | -780.9                           |
| 11                               | -873                        | 5.046031465                 | 305.2959418                           | 1159                      | 93205.61208                  | -793                             |
| -32.7                            | -975                        | 5.212440233                 | 271.537661                            | 1105                      | 73732.70132                  | -763                             |
| 69                               | -764                        | 4.583915008                 | 236.4216961                           | 944                       | 55895.21837                  | -536.3                           |
| 85                               | -991                        | 5.256393026                 | 302.0358049                           | 2021                      | 91225.62743                  | -675.5                           |
| 34.6                             | -910                        | 5.09988439                  | 300.5128884                           | 997                       | 90307.9961                   | -750.8                           |
| -307.9                           | -868                        | 4.423690054                 | 218.7815513                           | 902                       | 47865.36718                  | -832.7                           |
| -4                               | -969                        | 4.960085522                 | 282.3766282                           | 1078                      | 79736.56014                  | -797.8                           |
| 43                               | -853                        | 4.861644394                 | 284.4739956                           | 1086                      | 80925.45417                  | -689                             |
| 27                               | -876                        | 4.858630772                 | 331.5079789                           | 960                       | 109897.54                    | -801                             |
| 50                               | -872                        | 4.723005845                 | 320.9102446                           | 1825                      | 102983.3851                  | -726                             |
| 27                               | -838                        | 4.956690218                 | 246.9507517                           | 1163                      | 60984.67377                  | -630                             |
| 62                               | -906                        | 4.046493587                 | 285.0878063                           | 1312                      | 81275.05731                  | -685                             |
| 40                               | -1025                       | 5.30959151                  | 373.8492386                           | 1144                      | 139763.2532                  | -967.2                           |
| 55.8                             | -998                        | 5.337040868                 | 333.3412798                           | 1276                      | 111116.4088                  | -793                             |
| -185.6                           | -1017                       | 5.04395885                  | 277.6194712                           | 1155                      | 77072.57078                  | -932                             |
| 116                              | -912                        | 5.098665214                 | 324.8961734                           | 1313                      | 105557.5235                  | -702.7                           |
| 56                               | -838                        | 5.01580465                  | 239.1723082                           | 1803                      | 57203.39302                  | -518                             |
| 84                               | -893                        | 5.048373975                 | 304.9292443                           | 1097                      | 92981.84405                  | -680.2                           |
| 41                               | -1004                       | 4.731663287                 | 340.3010582                           | 1355                      | 115804.8102                  | -792                             |
| 84                               | -824                        | 4.606342551                 | 244.5955573                           | 1581                      | 59826.98664                  | -531                             |
| 37                               | -806                        | 4.233140963                 | 264.6571644                           | 2151                      | 70043.41469                  | -635                             |
| 33.4                             | -813                        | 4.962853847                 | 288.6034013                           | 1062                      | 83291.92325                  | -695.8                           |
| 36                               | -1007                       | 5.048716557                 | 348.721715                            | 1187                      | 121606.8345                  | -831                             |
| -52.1                            | -995                        | 5.117764057                 | 271.6963043                           | 1084                      | 73818.88176                  | -780                             |
| 71                               | -931                        | 4.855697484                 | 334.7137006                           | 1107                      | 112033.2614                  | -767                             |
| 67                               | -786                        | 5.025861652                 | 289.8361735                           | 987                       | 84005.00744                  | -705                             |
| 44                               | -968                        | 4.847429269                 | 322.7502815                           | 1370                      | 104167.7442                  | -761                             |
| 106                              | -893                        | 5.081913117                 | 307.4555409                           | 1395                      | 94528.9096                   | -675                             |
| 66                               | -860                        | 5.078813169                 | 302.5524242                           | 994                       | 91537.96941                  | -717                             |
| 40                               | -895                        | 4.482001472                 | 281.9503083                           | 1386                      | 79495.97632                  | -677.3                           |
| 53                               | -880                        | 4.447274381                 | 268.127251                            | 1105                      | 71892.22274                  | -638                             |
| 115.1                            | -959                        | 5.01152653                  | 305.9877546                           | 1823                      | 93628.50593                  | -649                             |
| 55.5                             | -962                        | 5.344319708                 | 330.0439372                           | 1195                      | 108929.0005                  | -804.5                           |
| 10.4                             | -900                        | 5.162796683                 | 291.1704745                           | 1016                      | 84780.24523                  | -756                             |
| 30                               | -872                        | 5.004973238                 | 281.3330454                           | 957                       | 79148.28242                  | -708                             |
| 35                               | -959                        | 5.170456911                 | 320.7468525                           | 1097                      | 102878.5434                  | -804.7                           |
| 33                               | -947                        | 4.701983989                 | 298.6597723                           | 1038                      | 89197.65959                  | -713                             |
| 138.7                            | -977                        | 5.568985609                 | 377.1868522                           | 1469                      | 142269.9215                  | -813.7                           |
| 62                               | -1008                       | 5.450254852                 | 335.5843875                           | 1396                      | 112616.8811                  | -815                             |
| 95                               | -1023                       | 5.080102316                 | 392.3518605                           | 2334                      | 153939.9824                  | -877                             |
| -119.2                           | -811                        | 4.485715816                 | 213.1979797                           | 845                       | 45453.37855                  | -725.2                           |
| 82                               | -793                        | 4.863148496                 | 259.1193627                           | 1049                      | 67142.84414                  | -576                             |
| 52                               | -931                        | 4.807775834                 | 263.8002276                           | 1919                      | 69590.5601                   | -599.5                           |
| 62.3                             | -858                        | 4.993842973                 | 283.1331662                           | 994                       | 80164.38983                  | -662.6                           |
| 45.9                             | -959                        | 5.207484275                 | 324.4756401                           | 1102                      | 105284.441                   | -814.9                           |
| -42.2                            | -826                        | 4.181882026                 | 312.195979                            | 1481                      | 97466.3293                   | -745.6                           |
| -170.8                           | -804                        | 4.362137553                 | 229.8451645                           | 884                       | 52828.79964                  | -743.8                           |
| 53                               | -888                        | 4.926363388                 | 328.2168471                           | 2035                      | 107726.2987                  | -726                             |
| 122                              | -1011                       | 5.265706683                 | 348.9928839                           | 1669                      | 121796.033                   | -739                             |
| 55                               | -887                        | 4.884741614                 | 308.0081871                           | 1237                      | 94869.04331                  | -719.8                           |
| 43                               | -971                        | 4.898502431                 | 292.277492                            | 1681                      | 85426.13232                  | -665                             |
| 71                               | -883                        | 4.679859587                 | 258.7412046                           | 1655                      | 66947.01098                  | -579                             |
| 170.6                            | -985                        | 5.349329833                 | 387.226951                            | 1273                      | 149944.7116                  | -798.6                           |
| 20                               | -932                        | 5.195735665                 | 341.3718431                           | 1798                      | 116534.7353                  | -791.5                           |
| -0.6                             | -776                        | 4.718732975                 | 268.8191991                           | 867                       | 72263.76178                  | -724                             |
| -277.8                           | -828                        | 4.676067612                 | 188.0450163                           | 797                       | 35360.92815                  | -772                             |
| 171                              | -958                        | 4.865748035                 | 291.2553085                           | 1207                      | 84829.65472                  | -642.8                           |

| original_firstorder_Kurtosis | original_firstorder_Mean | original_glrml_ShortRunLowGrayLevelEmphasis | original_glrml_GrayLevelVariance | original_glrml_LowGrayLevelRunEmphasis | original_glrml_GrayLevelNonUniformityNormalized |
|------------------------------|--------------------------|---------------------------------------------|----------------------------------|----------------------------------------|-------------------------------------------------|
| 1.508034792                  | -315.685524              | 0.004750789                                 | 157.1648797                      | 0.004824853                            | 0.046423506                                     |
| 2.340490511                  | -211.5609052             | 0.007717465                                 | 150.6686681                      | 0.008116193                            | 0.061480902                                     |
| 2.049119573                  | -256.5460829             | 0.005871415                                 | 124.5844009                      | 0.005929682                            | 0.037855711                                     |
| 1.617562099                  | -354.1609108             | 0.007135082                                 | 203.8234944                      | 0.007314233                            | 0.034897086                                     |
| 2.630373211                  | -495.0139276             | 0.023521758                                 | 87.03677509                      | 0.024166477                            | 0.036978404                                     |
| 1.754356915                  | -384.4385692             | 0.010304442                                 | 104.0093662                      | 0.010467837                            | 0.029615531                                     |
| 4.704954204                  | -664.9614243             | 0.025666388                                 | 34.31417511                      | 0.026780813                            | 0.068246262                                     |
| 1.455251499                  | -412.7175649             | 0.022970996                                 | 167.1537428                      | 0.023904894                            | 0.034179244                                     |
| 1.773662711                  | -311.995671              | 0.004776303                                 | 142.4862141                      | 0.004876034                            | 0.031917162                                     |
| 3.080965221                  | -185.278244              | 0.003011297                                 | 115.9535703                      | 0.003084727                            | 0.050391914                                     |
| 1.799449106                  | -405.6868198             | 0.011084999                                 | 112.923561                       | 0.011375135                            | 0.033770085                                     |
| 2.802338989                  | -194.4979757             | 0.00371891                                  | 154.4785214                      | 0.00378904                             | 0.04459857                                      |
| 1.79240286                   | -360.5655738             | 0.009996134                                 | 96.7654745                       | 0.010294411                            | 0.030055103                                     |
| 1.716372977                  | -344.1958855             | 0.008866368                                 | 101.1737187                      | 0.00910048                             | 0.029812724                                     |
| 1.987909239                  | -435.8737651             | 0.006576963                                 | 106.2459122                      | 0.006726047                            | 0.028884061                                     |
| 4.718659678                  | -101.8718871             | 0.002868744                                 | 109.8597292                      | 0.00304502                             | 0.107297958                                     |
| 1.790658482                  | -424.1891117             | 0.011242498                                 | 119.8284195                      | 0.01150727                             | 0.029802217                                     |
| 1.561267825                  | -285.7512864             | 0.006860339                                 | 154.6193977                      | 0.007077845                            | 0.038704056                                     |
| 1.983687588                  | -459.2474227             | 0.024652131                                 | 115.3360984                      | 0.025591007                            | 0.031338333                                     |
| 2.20539558                   | -189.2631203             | 0.004330287                                 | 116.7625286                      | 0.004489451                            | 0.065729018                                     |
| 2.678651405                  | -159.3543262             | 0.002659631                                 | 90.24100707                      | 0.002748632                            | 0.071183169                                     |
| 1.999262919                  | -305.8848837             | 0.00262272                                  | 101.4568953                      | 0.002666204                            | 0.030149106                                     |
| 2.063206821                  | -225.9483706             | 0.005282909                                 | 101.0059419                      | 0.005452695                            | 0.046759114                                     |
| 2.098729716                  | -573.0561331             | 0.017357556                                 | 156.5149539                      | 0.018158783                            | 0.032288427                                     |
| 2.707084108                  | -168.7790698             | 0.00206615                                  | 88.1381294                       | 0.002646826                            | 0.049862396                                     |
| 1.716950502                  | -255.0864553             | 0.0188737                                   | 153.2620298                      | 0.019458025                            | 0.042368737                                     |
| 3.382490343                  | -112.9965378             | 0.00420113                                  | 92.03621084                      | 0.004339276                            | 0.067258088                                     |
| 2.647368375                  | -197.5310537             | 0.006672768                                 | 113.244064                       | 0.006849397                            | 0.055122569                                     |
| 1.48221808                   | -473.8101983             | 0.0143674                                   | 192.0388432                      | 0.014910446                            | 0.033131782                                     |
| 2.875293739                  | -177.0971676             | 0.00489178                                  | 144.9785101                      | 0.005050002                            | 0.071067166                                     |
| 2.53089294                   | -177.9248191             | 0.003983894                                 | 103.5589226                      | 0.004802471                            | 0.058663076                                     |
| 2.021763416                  | -237.7352445             | 0.002765958                                 | 115.9644119                      | 0.002852454                            | 0.041250784                                     |
| 1.628975418                  | -318.4569602             | 0.009760301                                 | 200.5056304                      | 0.010107559                            | 0.042288637                                     |
| 4.162887999                  | -623.8557692             | 0.060385809                                 | 68.92118723                      | 0.062766092                            | 0.069011704                                     |
| 1.748676312                  | -454.2198795             | 0.010933661                                 | 146.5409162                      | 0.011133309                            | 0.030595532                                     |
| 1.58802852                   | -413.2985149             | 0.008970218                                 | 148.6827952                      | 0.009300349                            | 0.032143576                                     |
| 1.913095583                  | -256.5913194             | 0.004938924                                 | 195.2885713                      | 0.005071537                            | 0.066694623                                     |
| 2.327528067                  | -231.0888491             | 0.004956926                                 | 125.0816465                      | 0.005095118                            | 0.04095688                                      |
| 1.931515129                  | -450.2071856             | 0.011063802                                 | 108.2795988                      | 0.01132199                             | 0.031161971                                     |
| 1.677815812                  | -295.6816015             | 0.03320175                                  | 177.0632702                      | 0.034362705                            | 0.048593359                                     |
| 2.227667513                  | -194.6743555             | 0.004873788                                 | 160.7319881                      | 0.00501585                             | 0.057889206                                     |
| 1.669186924                  | -419.7418678             | 0.011078013                                 | 130.4700885                      | 0.011398575                            | 0.033697791                                     |
| 1.590494588                  | -427.6638246             | 0.006183258                                 | 144.7736443                      | 0.006370415                            | 0.03245574                                      |
| 1.605247058                  | -442.2839024             | 0.028632711                                 | 145.0787899                      | 0.030046999                            | 0.034116795                                     |
| 1.786641611                  | -435.9392971             | 0.005694017                                 | 117.5623672                      | 0.005829215                            | 0.028856935                                     |
| 2.116964874                  | -153.8635548             | 0.005441082                                 | 90.50441847                      | 0.005559048                            | 0.055037962                                     |
| 2.237955063                  | -248.6704173             | 0.0026882                                   | 145.6784366                      | 0.002761294                            | 0.030779292                                     |
| 1.57373218                   | -379.5060034             | 0.010157545                                 | 140.5611729                      | 0.01038253                             | 0.032427452                                     |
| 4.329138675                  | -637.3208955             | 0.09640672                                  | 76.45285295                      | 0.099757217                            | 0.057011444                                     |
| 2.317623124                  | -518.7686117             | 0.013306598                                 | 125.7042562                      | 0.013642144                            | 0.039782922                                     |
| 1.68781631                   | -259.7234229             | 0.006397266                                 | 128.4715384                      | 0.006584821                            | 0.04247101                                      |
| 1.377100129                  | -410.828295              | 0.019489006                                 | 170.9570782                      | 0.020093532                            | 0.041923612                                     |
| 1.839720178                  | -239.4046061             | 0.010506037                                 | 166.5027073                      | 0.010886725                            | 0.059992122                                     |
| 1.855720316                  | -272.6818951             | 0.006534113                                 | 96.65099665                      | 0.006651462                            | 0.035298762                                     |
| 3.368625465                  | -132.5974245             | 0.004838921                                 | 137.1734108                      | 0.005060524                            | 0.102735355                                     |
| 1.537902141                  | -447.5153584             | 0.03742446                                  | 215.7185253                      | 0.040196581                            | 0.027920737                                     |
| 1.545894141                  | -388.7277702             | 0.007016033                                 | 175.5181944                      | 0.007237756                            | 0.027955624                                     |
| 3.085348842                  | -666.4068059             | 0.026256742                                 | 124.2956517                      | 0.027318145                            | 0.038068303                                     |
| 1.598398077                  | -232.0331695             | 0.007031421                                 | 167.8915417                      | 0.00721314                             | 0.03520784                                      |
| 3.992715097                  | -195.8706016             | 0.00588403                                  | 92.06156423                      | 0.006160563                            | 0.035772331                                     |
| 1.522443598                  | -265.7899953             | 0.006083429                                 | 147.3426313                      | 0.006211233                            | 0.036249969                                     |
| 1.468887895                  | -316.9184009             | 0.004811392                                 | 182.0407535                      | 0.005020752                            | 0.053993723                                     |
| 2.604256818                  | -125.8650485             | 0.003833561                                 | 97.91893231                      | 0.003935222                            | 0.058447882                                     |
| 4.159902867                  | -120.5961186             | 0.007047132                                 | 123.5423779                      | 0.007424191                            | 0.084781859                                     |
| 1.581761639                  | -299.1751152             | 0.020022551                                 | 130.9678047                      | 0.020386914                            | 0.035985686                                     |
| 1.535971439                  | -332.4269156             | 0.00931232                                  | 193.8320438                      | 0.009569504                            | 0.039653885                                     |
| 2.140888133                  | -493.0634518             | 0.010912524                                 | 117.1134977                      | 0.0112339                              | 0.033727271                                     |
| 1.471564688                  | -286.8066938             | 0.005762958                                 | 177.2393416                      | 0.005943616                            | 0.046656382                                     |
| 1.632125898                  | -360.4798206             | 0.028885556                                 | 131.516102                       | 0.029322655                            | 0.034018718                                     |
| 1.544376155                  | -290.3172551             | 0.005731446                                 | 165.8310737                      | 0.005892844                            | 0.047223072                                     |
| 1.829211599                  | -201.0743421             | 0.005541232                                 | 151.4834861                      | 0.00566542                             | 0.037457963                                     |
| 1.499333184                  | -317.5775022             | 0.009077322                                 | 143.43507                        | 0.009313987                            | 0.033100968                                     |
| 2.134904628                  | -206.7925697             | 0.005588289                                 | 129.950063                       | 0.005822512                            | 0.067280365                                     |
| 2.853059315                  | -163.6509827             | 0.004743142                                 | 118.6197773                      | 0.004894284                            | 0.070508468                                     |
| 2.859957564                  | -123.8408497             | 0.002954035                                 | 154.4602934                      | 0.003037888                            | 0.04767998                                      |
| 1.624140851                  | -416.0206093             | 0.008153902                                 | 172.1718472                      | 0.008366698                            | 0.027086426                                     |
| 1.538011305                  | -382.8800358             | 0.012036277                                 | 134.447212                       | 0.012300588                            | 0.029826731                                     |
| 1.564912919                  | -313.0344262             | 0.008730146                                 | 124.4884506                      | 0.008903154                            | 0.035162692                                     |
| 1.61316511                   | -340.2301587             | 0.007787707                                 | 162.0301558                      | 0.007996033                            | 0.031989456                                     |
| 1.533281197                  | -281.6781448             | 0.004731353                                 | 140.6908297                      | 0.004896843                            | 0.050401511                                     |
| 1.642289553                  | -313.8515187             | 0.007978966                                 | 226.1052474                      | 0.008076863                            | 0.023241975                                     |
| 1.695976536                  | -421.3154362             | 0.00631153                                  | 178.9409705                      | 0.006430153                            | 0.025057674                                     |
| 1.615150934                  | -301.5189828             | 0.011206238                                 | 245.4806914                      | 0.011490678                            | 0.041720706                                     |
| 3.463510267                  | -535.3724138             | 0.035234283                                 | 73.78682053                      | 0.03640471                             | 0.055524467                                     |
| 1.892333217                  | -192.0917134             | 0.00950626                                  | 106.4678682                      | 0.009929046                            | 0.043194598                                     |
| 2.543767924                  | -181.1037253             | 0.002376836                                 | 113.5464198                      | 0.002463116                            | 0.050101964                                     |
| 1.592696447                  | -282.5642674             | 0.009567209                                 | 125.9036116                      | 0.00975969                             | 0.036668936                                     |
| 1.715857036                  | -457.6636598             | 0.008938445                                 | 165.7338247                      | 0.009198934                            | 0.030781802                                     |
| 1.875164986                  | -308.4098361             | 0.021508948                                 | 159.9933582                      | 0.022084906                            | 0.070539997                                     |
| 2.891905044                  | -536.0190476             | 0.035972463                                 | 85.97096498                      | 0.036764004                            | 0.066635719                                     |
| 2.223806224                  | -216.0518239             | 0.007919944                                 | 176.3296543                      | 0.008170232                            | 0.04887803                                      |
| 1.928334359                  | -210.8130312             | 0.00611814                                  | 197.3928952                      | 0.006161705                            | 0.034787632                                     |
| 1.738045761                  | -248.9187867             | 0.009176304                                 | 152.2958262                      | 0.009404765                            | 0.043210856                                     |
| 2.262607643                  | -211.600489              | 0.002818796                                 | 138.9458484                      | 0.002925361                            | 0.049575329                                     |
| 2.50161423                   | -152.755081              | 0.002546858                                 | 109.3345436                      | 0.002623671                            | 0.056463097                                     |
| 1.450599654                  | -324.56917               | 0.014522619                                 | 237.915997                       | 0.01468903                             | 0.0282268                                       |
| 2.923734369                  | -427.6669408             | 0.009782201                                 | 185.3819392                      | 0.010102439                            | 0.032709419                                     |
| 2.098327184                  | -454.4796748             | 0.043393544                                 | 113.9265051                      | 0.044120954                            | 0.046232355                                     |
| 2.5512171                    | -556.0923483             | 0.027710019                                 | 56.54903064                      | 0.02923221                             | 0.044471962                                     |
| 3.431185492                  | -94.75960347             | 0.004320047                                 | 140.7865388                      | 0.004366322                            | 0.045905716                                     |

| original_glrIm_RunVariance | original_glrIm_GrayLevelNonUniformity | original_glrIm_LongRunEmphasis | original_glrIm_ShortRunHighGrayLevelEmphasis | original_glrIm_RunLengthNonUniformity | original_glrIm_ShortRunEmphasis |
|----------------------------|---------------------------------------|--------------------------------|----------------------------------------------|---------------------------------------|---------------------------------|
| 0.150051519                | 29.82961878                           | 1.361166197                    | 835.7943668                                  | 550.7647221                           | 0.940014931                     |
| 0.211392798                | 111.7660558                           | 1.524274371                    | 831.2898725                                  | 1450.845536                           | 0.912219725                     |
| 0.070768982                | 15.56802438                           | 1.187364497                    | 903.0743424                                  | 372.3983655                           | 0.961879291                     |
| 0.092808361                | 86.01125998                           | 1.237862105                    | 862.3777779                                  | 2187.941318                           | 0.954251496                     |
| 0.035399352                | 12.8344791                            | 1.105857085                    | 296.6380863                                  | 324.8459329                           | 0.974783924                     |
| 0.036996712                | 18.38010853                           | 1.110721029                    | 485.5974101                                  | 578.8117256                           | 0.973563619                     |
| 0.064327822                | 21.73533331                           | 1.187161329                    | 132.8062228                                  | 285.8895083                           | 0.958185146                     |
| 0.06436906                 | 32.5202684                            | 1.175007565                    | 522.9639633                                  | 865.1996445                           | 0.963452502                     |
| 0.067079417                | 62.77593407                           | 1.185293142                    | 868.7477561                                  | 1773.5508                             | 0.960438234                     |
| 0.132503041                | 142.3535408                           | 1.338270752                    | 1016.269248                                  | 2403.079252                           | 0.937632833                     |
| 0.058738472                | 26.56278329                           | 1.165739105                    | 448.035477                                   | 715.8432528                           | 0.963760904                     |
| 0.110456602                | 60.96316881                           | 1.288748395                    | 1104.004164                                  | 1181.865103                           | 0.944133061                     |
| 0.051565813                | 59.52158901                           | 1.148804529                    | 478.2733033                                  | 1813.186044                           | 0.96635721                      |
| 0.04237606                 | 32.07412411                           | 1.122580982                    | 509.4937621                                  | 999.1334544                           | 0.971875842                     |
| 0.040052682                | 25.37833425                           | 1.115473016                    | 579.6659106                                  | 819.4675115                           | 0.973485091                     |
| 0.302582802                | 625.8990679                           | 1.734199837                    | 1212.927908                                  | 4335.37652                            | 0.884842196                     |
| 0.039847646                | 20.05940215                           | 1.115967573                    | 483.1771619                                  | 627.4700107                           | 0.973228772                     |
| 0.10341533                 | 83.80641658                           | 1.26897405                     | 745.3962015                                  | 1891.656224                           | 0.948211804                     |
| 0.046181762                | 17.53248235                           | 1.129354495                    | 393.4569911                                  | 519.3432597                           | 0.971411097                     |
| 0.312188769                | 158.6473047                           | 1.672290806                    | 770.8908914                                  | 1913.523777                           | 0.909671012                     |
| 0.261481298                | 323.9811453                           | 1.585558724                    | 830.192754                                   | 3657.589699                           | 0.915141648                     |
| 0.047075129                | 49.84010325                           | 1.130710653                    | 972.866066                                   | 1535.063052                           | 0.971536884                     |
| 0.135939367                | 117.0999994                           | 1.330581587                    | 704.2510378                                  | 2156.116246                           | 0.942185876                     |
| 0.046461605                | 14.8615623                            | 1.139647828                    | 483.7547233                                  | 422.097941                            | 0.966983993                     |
| 0.091875762                | 56.0120893                            | 1.24231339                     | 1063.4337                                    | 991.9631062                           | 0.952172372                     |
| 0.109122916                | 27.19129073                           | 1.282286396                    | 701.7512439                                  | 557.7959863                           | 0.946149969                     |
| 0.171146654                | 207.5851335                           | 1.435616835                    | 766.6368749                                  | 2517.485912                           | 0.921575249                     |
| 0.118683385                | 72.71015905                           | 1.304045361                    | 828.44471                                    | 1137.685617                           | 0.943074013                     |
| 0.067454236                | 55.53621195                           | 1.180364391                    | 618.6877525                                  | 1524.852386                           | 0.963347109                     |
| 0.218489601                | 158.4845876                           | 1.524492775                    | 1004.62431                                   | 1789.885413                           | 0.914797785                     |
| 0.115329696                | 171.0769502                           | 1.305943989                    | 858.0481331                                  | 2499.728726                           | 0.940565474                     |
| 0.108419253                | 226.8024526                           | 1.276290814                    | 918.1211582                                  | 4807.708405                           | 0.948188815                     |
| 0.125303875                | 79.06654938                           | 1.310786288                    | 765.1424848                                  | 1618.413337                           | 0.944240248                     |
| 0.044088817                | 6.919540724                           | 1.122786278                    | 162.2846803                                  | 93.62524861                           | 0.973316236                     |
| 0.048764083                | 9.751664929                           | 1.134616108                    | 607.2327184                                  | 295.4624257                           | 0.970966524                     |
| 0.071270507                | 61.46565274                           | 1.188937321                    | 588.6557079                                  | 1731.023975                           | 0.961677442                     |
| 0.203284252                | 170.6058521                           | 1.47950818                     | 1027.918488                                  | 2099.600624                           | 0.923474538                     |
| 0.102570865                | 127.579999                            | 1.264057604                    | 783.8423122                                  | 2730.857308                           | 0.949405683                     |
| 0.046914165                | 24.92273149                           | 1.138159769                    | 473.787948                                   | 736.3047134                           | 0.968159699                     |
| 0.136789865                | 46.75600958                           | 1.328499327                    | 597.4699598                                  | 832.7381853                           | 0.944144347                     |
| 0.203986962                | 75.337729                             | 1.492030672                    | 1048.367822                                  | 1056.940337                           | 0.919538206                     |
| 0.060477301                | 30.59984387                           | 1.163053477                    | 481.6592369                                  | 830.6378495                           | 0.96580523                      |
| 0.054375207                | 50.90904479                           | 1.151878207                    | 614.1912675                                  | 1440.485621                           | 0.967131945                     |
| 0.058767444                | 33.24391179                           | 1.166825576                    | 435.9018153                                  | 885.7454026                           | 0.963633468                     |
| 0.036941337                | 52.37312267                           | 1.107943408                    | 591.4948098                                  | 1698.574097                           | 0.974839285                     |
| 0.108775764                | 112.9352354                           | 1.290839733                    | 653.350373                                   | 1768.030041                           | 0.942576798                     |
| 0.067650326                | 124.1770458                           | 1.186629736                    | 1009.261239                                  | 3637.146232                           | 0.960376434                     |
| 0.058888689                | 17.99781526                           | 1.163349456                    | 588.4011768                                  | 506.709216                            | 0.96506632                      |
| 0.036061136                | 7.363012568                           | 1.113814421                    | 173.3599764                                  | 119.9366524                           | 0.971546395                     |
| 0.046341088                | 18.92603131                           | 1.138775129                    | 458.2065205                                  | 436.6804598                           | 0.967303012                     |
| 0.096616621                | 135.2288479                           | 1.25563543                     | 682.071512                                   | 2789.663843                           | 0.9492708                       |
| 0.080938792                | 32.58694116                           | 1.216521392                    | 516.7337218                                  | 694.3320225                           | 0.956379286                     |
| 0.14605071                 | 193.5085252                           | 1.37116798                     | 727.9508401                                  | 2899.79618                            | 0.932314091                     |
| 0.062470076                | 19.75977314                           | 1.178329174                    | 604.972871                                   | 505.1061512                           | 0.960666318                     |
| 0.21872251                 | 585.2438463                           | 1.541329873                    | 1001.209267                                  | 4510.038535                           | 0.909242734                     |
| 0.070061798                | 23.21899669                           | 1.18916216                     | 723.1065906                                  | 751.3876207                           | 0.960985883                     |
| 0.049930177                | 58.62570302                           | 1.145197268                    | 762.2945284                                  | 1923.804468                           | 0.966950155                     |
| 0.046383115                | 47.13693391                           | 1.137850572                    | 343.0921927                                  | 1137.497464                           | 0.967675841                     |
| 0.086588162                | 26.78840943                           | 1.232579649                    | 871.5382433                                  | 673.1252887                           | 0.952977874                     |
| 0.053542202                | 30.10680181                           | 1.15191152                     | 765.0773726                                  | 772.154986                            | 0.966603316                     |
| 0.072945771                | 72.43380028                           | 1.199084821                    | 748.6071835                                  | 1792.427501                           | 0.958375471                     |
| 0.178876277                | 266.9256042                           | 1.413245724                    | 864.7893101                                  | 4167.417904                           | 0.934019998                     |
| 0.118869229                | 165.6518192                           | 1.315465267                    | 815.3069431                                  | 2422.886744                           | 0.939126671                     |
| 0.307032625                | 195.0289686                           | 1.726442229                    | 794.6051279                                  | 1734.950612                           | 0.890355792                     |
| 0.077561595                | 7.331656495                           | 1.215250265                    | 537.3368595                                  | 180.9287542                           | 0.954385393                     |
| 0.07986267                 | 57.6629589                            | 1.22230151                     | 900.184415                                   | 1286.581175                           | 0.952977054                     |
| 0.03890033                 | 12.80704825                           | 1.115748963                    | 533.6944407                                  | 353.3113193                           | 0.972542893                     |
| 0.110251657                | 138.1446845                           | 1.278641807                    | 805.308518                                   | 2586.410913                           | 0.947997116                     |
| 0.04830454                 | 14.53692143                           | 1.138018782                    | 424.1405222                                  | 394.0828124                           | 0.96098692                      |
| 0.090428081                | 88.54031544                           | 1.242880273                    | 853.3168531                                  | 1649.301314                           | 0.950868846                     |
| 0.070255713                | 107.4874344                           | 1.194675106                    | 891.1797805                                  | 2577.333491                           | 0.958696011                     |
| 0.068288283                | 35.31587797                           | 1.189816387                    | 610.1591376                                  | 960.2166821                           | 0.95953536                      |
| 0.218946993                | 307.4584826                           | 1.509804286                    | 774.0355443                                  | 3717.439277                           | 0.920080909                     |
| 0.150767695                | 426.0889228                           | 1.389365015                    | 885.6262616                                  | 5013.740261                           | 0.928028987                     |
| 0.102052245                | 404.019305                            | 1.277404722                    | 1236.983178                                  | 7317.007602                           | 0.943739538                     |
| 0.039223159                | 29.13841413                           | 1.116171199                    | 672.1804387                                  | 1001.461141                           | 0.972722485                     |
| 0.044566254                | 32.04217343                           | 1.126329953                    | 555.2339996                                  | 997.7185766                           | 0.971761902                     |
| 0.059223914                | 20.36727597                           | 1.168925419                    | 599.4944675                                  | 524.9098066                           | 0.96252907                      |
| 0.068548923                | 53.43924292                           | 1.185603124                    | 768.9954164                                  | 1512.256481                           | 0.961646222                     |
| 0.144477482                | 130.1324272                           | 1.364240901                    | 758.7675871                                  | 2180.794588                           | 0.93478103                      |
| 0.038183928                | 11.32676221                           | 1.108284565                    | 958.0431237                                  | 457.0929577                           | 0.975606367                     |
| 0.03081866                 | 32.61478602                           | 1.092727368                    | 764.9587974                                  | 1226.957809                           | 0.977612325                     |
| 0.070507747                | 109.9946877                           | 1.193334981                    | 1028.277277                                  | 2371.046556                           | 0.95934005                      |
| 0.042982751                | 7.731757944                           | 1.128454581                    | 219.0295429                                  | 128.6701196                           | 0.969722375                     |
| 0.093718371                | 136.5128541                           | 1.248166571                    | 655.0775278                                  | 2782.294628                           | 0.950836973                     |
| 0.136706116                | 248.7729624                           | 1.356208263                    | 969.7432323                                  | 4169.114432                           | 0.932785967                     |
| 0.079544477                | 26.83049513                           | 1.211905536                    | 643.1426496                                  | 654.8879266                           | 0.957428037                     |
| 0.046072772                | 45.8401071                            | 1.133109113                    | 589.6790153                                  | 1375.768405                           | 0.969715863                     |
| 0.119459291                | 11.72982641                           | 1.343871293                    | 571.1566029                                  | 138.8618483                           | 0.928766076                     |
| 0.036786787                | 6.773389744                           | 1.105395444                    | 234.7609329                                  | 95.5373319                            | 0.976215749                     |
| 0.129040878                | 177.6558761                           | 1.32866111                     | 854.2826922                                  | 3105.249203                           | 0.939252058                     |
| 0.067738095                | 23.26818426                           | 1.18389503                     | 1192.107861                                  | 605.7703209                           | 0.961996338                     |
| 0.120521823                | 40.44314897                           | 1.316177368                    | 749.2778772                                  | 800.0104696                           | 0.939629911                     |
| 0.143919186                | 184.2344155                           | 1.360796255                    | 975.0760565                                  | 3147.27801                            | 0.93573173                      |
| 0.11118077                 | 301.6143827                           | 1.294732555                    | 930.7551916                                  | 4596.587491                           | 0.942270097                     |
| 0.045417858                | 6.841426038                           | 1.136827997                    | 945.8276922                                  | 226.68951                             | 0.967624731                     |
| 0.071571121                | 37.54784861                           | 1.194765249                    | 606.1534141                                  | 1030.987466                           | 0.958930605                     |
| 0.034395468                | 5.499383468                           | 1.104888711                    | 311.5246709                                  | 111.2425574                           | 0.974508336                     |
| 0.056733456                | 16.03658649                           | 1.162687202                    | 205.9858693                                  | 327.8024641                           | 0.963543832                     |
| 0.103860856                | 34.21128724                           | 1.279915773                    | 1282.795136                                  | 643.6807476                           | 0.943753683                     |

| original_glrIm_LongRunHighGrayLevelEmphasis | original_glrIm_RunPercentage | original_glrIm_LongRunLowGrayLevelEmphasis | original_glrIm_RunEntropy | original_glrIm_HighGrayLevelRunEmphasis |
|---------------------------------------------|------------------------------|--------------------------------------------|---------------------------|-----------------------------------------|
| 1528.368499                                 | 0.909239486                  | 0.005206348                                | 5.261324571               | 931.1848517                             |
| 1642.717251                                 | 0.874189845                  | 0.010076617                                | 5.208744995               | 944.3240208                             |
| 1229.856929                                 | 0.947004608                  | 0.006183936                                | 5.249237346               | 956.8703652                             |
| 1266.399941                                 | 0.934929207                  | 0.008104662                                | 5.563360809               | 924.1385669                             |
| 335.3227867                                 | 0.966788087                  | 0.026897751                                | 5.11072054                | 304.2864476                             |
| 582.0939154                                 | 0.965187223                  | 0.011135722                                | 5.303536878               | 504.0694509                             |
| 149.6490757                                 | 0.94476147                   | 0.031806252                                | 4.487508872               | 135.9389463                             |
| 720.171284                                  | 0.949332105                  | 0.027787581                                | 5.313646352               | 554.8364688                             |
| 1139.787639                                 | 0.945942946                  | 0.005311078                                | 5.462183623               | 914.8522435                             |
| 1623.500368                                 | 0.911282713                  | 0.003438229                                | 5.300204656               | 1108.59131                              |
| 602.2064019                                 | 0.950981304                  | 0.012636183                                | 5.258556787               | 474.8014923                             |
| 1652.373319                                 | 0.9217793                    | 0.004107502                                | 5.471277188               | 1191.018679                             |
| 587.4373553                                 | 0.954862399                  | 0.011552682                                | 5.363029359               | 497.9567189                             |
| 608.6210772                                 | 0.962295308                  | 0.01010696                                 | 5.327881675               | 527.7765236                             |
| 661.3632351                                 | 0.964451575                  | 0.00738437                                 | 5.429187004               | 595.068265                              |
| 2499.012396                                 | 0.838048521                  | 0.003967404                                | 4.824396878               | 1310.188008                             |
| 572.5512432                                 | 0.964293586                  | 0.012639927                                | 5.3410931                 | 499.9142955                             |
| 1141.255301                                 | 0.927035229                  | 0.008043149                                | 5.394300304               | 807.0090755                             |
| 474.4321537                                 | 0.961274121                  | 0.029945293                                | 5.303711185               | 407.905094                              |
| 1802.419257                                 | 0.85911625                   | 0.005403338                                | 5.211887953               | 888.3332898                             |
| 1746.282979                                 | 0.869949346                  | 0.003280188                                | 5.050406286               | 942.7621132                             |
| 1178.294101                                 | 0.961046512                  | 0.002861591                                | 5.38683975                | 1008.971425                             |
| 1162.729714                                 | 0.915866265                  | 0.006253591                                | 5.210854035               | 769.8128045                             |
| 583.5452094                                 | 0.956820726                  | 0.021485506                                | 5.373289896               | 502.6067157                             |
| 1504.292068                                 | 0.932724252                  | 0.00284364                                 | 5.072833117               | 1135.107408                             |
| 1100.151134                                 | 0.923963644                  | 0.021858814                                | 5.310971517               | 763.3655311                             |
| 1313.146675                                 | 0.889919659                  | 0.005010257                                | 5.165522862               | 848.5631995                             |
| 1294.032871                                 | 0.91953406                   | 0.007695575                                | 5.110776257               | 900.304119                              |
| 818.0336982                                 | 0.949052081                  | 0.017493741                                | 5.414459119               | 650.3095534                             |
| 1968.543463                                 | 0.87623313                   | 0.005847348                                | 5.096912474               | 1136.68122                              |
| 1340.331138                                 | 0.917100201                  | 0.004535643                                | 5.085207063               | 935.2020254                             |
| 1377.378477                                 | 0.92628097                   | 0.003259136                                | 5.357976037               | 987.8996057                             |
| 1235.068698                                 | 0.91902834                   | 0.011693859                                | 5.452474425               | 832.785306                              |
| 171.5917738                                 | 0.963757396                  | 0.075168004                                | 4.398887191               | 164.1214815                             |
| 773.4423513                                 | 0.959916589                  | 0.011980487                                | 5.364021365               | 635.6143144                             |
| 794.313048                                  | 0.946382331                  | 0.010873982                                | 5.406041164               | 622.0117324                             |
| 2026.834614                                 | 0.886431624                  | 0.005729763                                | 5.271364725               | 1161.504557                             |
| 1167.718521                                 | 0.928306041                  | 0.005707161                                | 5.385019007               | 843.1643825                             |
| 557.722111                                  | 0.957807462                  | 0.012452249                                | 5.360475404               | 489.5265315                             |
| 1022.028989                                 | 0.916550561                  | 0.039397435                                | 5.298478071               | 656.0015675                             |
| 1973.281996                                 | 0.88190168                   | 0.005689977                                | 5.400494707               | 1174.450153                             |
| 650.8042234                                 | 0.952699976                  | 0.012764822                                | 5.28689278                | 508.7461538                             |
| 770.4261008                                 | 0.955120397                  | 0.007232431                                | 5.348383743               | 641.2028986                             |
| 565.9102063                                 | 0.950469043                  | 0.036214171                                | 5.30388026                | 458.2929042                             |
| 671.056005                                  | 0.966412714                  | 0.006411023                                | 5.409301791               | 606.4531074                             |
| 1002.773892                                 | 0.920487502                  | 0.006095928                                | 5.03781889                | 709.8053095                             |
| 1326.218717                                 | 0.945580439                  | 0.003082819                                | 5.576153411               | 1063.115443                             |
| 796.1315691                                 | 0.951840612                  | 0.011520212                                | 5.335048732               | 624.3881047                             |
| 196.3959277                                 | 0.963834673                  | 0.113023396                                | 4.582301917               | 177.9671667                             |
| 558.8333836                                 | 0.95712738                   | 0.015022805                                | 5.180835177               | 476.6101397                             |
| 1019.760997                                 | 0.929389827                  | 0.007433039                                | 5.268057829               | 736.1903791                             |
| 763.6390936                                 | 0.939261464                  | 0.022823676                                | 5.182844501               | 556.6768868                             |
| 1239.537666                                 | 0.904032372                  | 0.012670233                                | 5.279209122               | 804.3222675                             |
| 804.9443817                                 | 0.947025901                  | 0.007149889                                | 5.222634702               | 640.4509248                             |
| 1908.162148                                 | 0.871578674                  | 0.006181649                                | 4.788297411               | 1129.144368                             |
| 970.3355537                                 | 0.94574254                   | 0.053889258                                | 5.584712232               | 764.4623369                             |
| 934.9229361                                 | 0.956048967                  | 0.008190512                                | 5.585359063               | 793.8351682                             |
| 378.526313                                  | 0.957522756                  | 0.032158225                                | 5.288717293               | 350.0829349                             |
| 1265.42025                                  | 0.934511435                  | 0.007981818                                | 5.447812865               | 935.6965994                             |
| 942.505568                                  | 0.955033616                  | 0.007291304                                | 5.254148122               | 796.835913                              |
| 1035.668016                                 | 0.942679784                  | 0.00681268                                 | 5.375590304               | 797.1180031                             |
| 1612.67856                                  | 0.90098857                   | 0.006030953                                | 5.30503898                | 961.4240761                             |
| 1252.593633                                 | 0.915857605                  | 0.004403656                                | 5.085412319               | 884.466073                              |
| 1695.790893                                 | 0.841027519                  | 0.009377964                                | 5.110827335               | 910.5841292                             |
| 772.838068                                  | 0.938319745                  | 0.022055006                                | 5.217028792               | 577.0096562                             |
| 1275.807541                                 | 0.936103819                  | 0.010660273                                | 5.41119781                | 964.0229282                             |
| 617.5441879                                 | 0.963881296                  | 0.012545642                                | 5.280599323               | 549.8698783                             |
| 1263.158438                                 | 0.925579269                  | 0.006750663                                | 5.291377714               | 874.1014785                             |
| 557.6823172                                 | 0.958088996                  | 0.031331623                                | 5.223458131               | 448.0911718                             |
| 1247.482906                                 | 0.93191294                   | 0.006595253                                | 5.244948248               | 917.7841346                             |
| 1194.817604                                 | 0.943648785                  | 0.006201437                                | 5.412737814               | 943.4349972                             |
| 836.0068911                                 | 0.944743476                  | 0.010412144                                | 5.373211686               | 649.1884569                             |
| 1546.794862                                 | 0.881965944                  | 0.006937513                                | 5.155172925               | 875.3845829                             |
| 1497.965544                                 | 0.899241765                  | 0.005614675                                | 5.038790929               | 979.5280162                             |
| 1766.679715                                 | 0.922766885                  | 0.003413709                                | 5.481231499               | 1325.002269                             |
| 788.8387983                                 | 0.963881996                  | 0.009251513                                | 5.542510134               | 693.7628978                             |
| 677.7047158                                 | 0.961710626                  | 0.013448106                                | 5.367039698               | 577.5552683                             |
| 810.2177956                                 | 0.949432535                  | 0.009614146                                | 5.266334917               | 636.7689074                             |
| 1043.020251                                 | 0.946755625                  | 0.009012923                                | 5.466187887               | 814.7580844                             |
| 1330.319558                                 | 0.906292232                  | 0.005663211                                | 5.228081012               | 842.0433841                             |
| 1152.703625                                 | 0.966880342                  | 0.008546369                                | 5.72673229                | 993.6310113                             |
| 867.9271394                                 | 0.970573051                  | 0.006925819                                | 5.619088969               | 785.2036155                             |
| 1389.166304                                 | 0.944043421                  | 0.012777929                                | 5.421123191               | 1089.342794                             |
| 238.9488301                                 | 0.960212202                  | 0.041272293                                | 4.668213166               | 222.9457178                             |
| 957.4402237                                 | 0.931447497                  | 0.011733934                                | 5.252680438               | 703.4346696                             |
| 1556.146857                                 | 0.906192055                  | 0.002874718                                | 5.346584654               | 1060.200274                             |
| 932.2899273                                 | 0.940083053                  | 0.010570003                                | 5.307430054               | 689.5990438                             |
| 715.7709828                                 | 0.95945678                   | 0.010331484                                | 5.435308446               | 612.3108798                             |
| 919.4516986                                 | 0.907103825                  | 0.02459106                                 | 4.623843241               | 629.8979308                             |
| 244.2751488                                 | 0.967765568                  | 0.040232633                                | 4.520678415               | 236.5887981                             |
| 1326.318547                                 | 0.913749395                  | 0.009385879                                | 5.43199667                | 925.7602063                             |
| 1593.896557                                 | 0.946938331                  | 0.006355529                                | 5.560389076               | 1260.209633                             |
| 1222.304385                                 | 0.915173867                  | 0.010407665                                | 5.334649714               | 822.7764958                             |
| 1595.039942                                 | 0.907523039                  | 0.003449896                                | 5.431301206               | 1066.256764                             |
| 1400.138527                                 | 0.919658708                  | 0.002983807                                | 5.159346029               | 1006.243749                             |
| 1161.394772                                 | 0.957737914                  | 0.015379431                                | 5.534747558               | 987.1342835                             |
| 798.9965294                                 | 0.94388917                   | 0.011464782                                | 5.499184687               | 637.0839703                             |
| 354.2427472                                 | 0.966854284                  | 0.047066672                                | 4.849195346               | 320.0209489                             |
| 233.8079618                                 | 0.951288817                  | 0.03605418                                 | 4.913693482               | 211.3257508                             |
| 1876.995603                                 | 0.922886283                  | 0.004582071                                | 5.282168563               | 1381.726166                             |

| original_glrIm_RunLengthNonUniformityNormalized | original_glszm_GrayLevelVariance | original_glszm_SmallAreaHighGrayLevelEmphasis | original_glszm_GrayLevelNonUniformityNormalized |
|-------------------------------------------------|----------------------------------|-----------------------------------------------|-------------------------------------------------|
| 0.857436638                                     | 118.1932581                      | 574.5255181                                   | 0.02831611                                      |
| 0.797647079                                     | 127.2798406                      | 474.9998816                                   | 0.027676297                                     |
| 0.905449663                                     | 106.9599213                      | 578.8822061                                   | 0.028396375                                     |
| 0.887719796                                     | 174.5068578                      | 594.2099796                                   | 0.023648985                                     |
| 0.935633409                                     | 81.59731358                      | 231.1761049                                   | 0.035614815                                     |
| 0.932476648                                     | 85.9009834                       | 325.2102885                                   | 0.03063707                                      |
| 0.89674564                                      | 43.32399477                      | 153.31093                                     | 0.048265351                                     |
| 0.90907033                                      | 124.7915973                      | 353.207608                                    | 0.029597347                                     |
| 0.901520098                                     | 126.8174942                      | 583.2994364                                   | 0.026704605                                     |
| 0.850622595                                     | 123.5343233                      | 637.8473989                                   | 0.028124408                                     |
| 0.90958414                                      | 83.93069943                      | 268.5071858                                   | 0.032967864                                     |
| 0.864628164                                     | 176.1488673                      | 749.4000959                                   | 0.024157905                                     |
| 0.915329074                                     | 84.73255281                      | 312.0179867                                   | 0.03044249                                      |
| 0.928530263                                     | 85.5744834                       | 320.4988663                                   | 0.030637037                                     |
| 0.932485934                                     | 104.1609954                      | 456.2319958                                   | 0.027614305                                     |
| 0.742852808                                     | 122.0637724                      | 627.486367                                    | 0.031366181                                     |
| 0.931915285                                     | 100.1181693                      | 331.2298848                                   | 0.029770381                                     |
| 0.874228108                                     | 120.8571367                      | 439.8666942                                   | 0.02755929                                      |
| 0.927800055                                     | 92.77163335                      | 267.3359385                                   | 0.0314202                                       |
| 0.793802715                                     | 91.64526675                      | 441.0947045                                   | 0.029622975                                     |
| 0.804128654                                     | 81.95904161                      | 504.9426051                                   | 0.032392139                                     |
| 0.928204914                                     | 91.38172748                      | 693.1710602                                   | 0.029159416                                     |
| 0.861145785                                     | 81.87562889                      | 415.2704863                                   | 0.031600318                                     |
| 0.916690686                                     | 128.5879959                      | 389.6656534                                   | 0.028855398                                     |
| 0.882917929                                     | 85.92022882                      | 670.9713719                                   | 0.031608937                                     |
| 0.869295435                                     | 130.984375                       | 422.7901374                                   | 0.028225309                                     |
| 0.815660383                                     | 116.9226308                      | 500.1387008                                   | 0.029190011                                     |
| 0.86255855                                      | 105.1343856                      | 463.7700035                                   | 0.030386716                                     |
| 0.909253903                                     | 146.7746631                      | 470.5651316                                   | 0.026288545                                     |
| 0.802585099                                     | 137.4422787                      | 565.430088                                    | 0.027454364                                     |
| 0.856791732                                     | 93.93445802                      | 495.3563881                                   | 0.029955716                                     |
| 0.874353071                                     | 99.84433557                      | 543.7285928                                   | 0.027974542                                     |
| 0.865634935                                     | 169.1902863                      | 510.5138888                                   | 0.025507069                                     |
| 0.93307299                                      | 75.15976331                      | 178.4963414                                   | 0.053254438                                     |
| 0.926824642                                     | 125.1075392                      | 460.9063811                                   | 0.028491076                                     |
| 0.904964683                                     | 111.7733896                      | 398.1427945                                   | 0.027913381                                     |
| 0.821319675                                     | 163.5955898                      | 613.0278236                                   | 0.024853126                                     |
| 0.876660142                                     | 115.1177897                      | 500.6717028                                   | 0.027653271                                     |
| 0.919996734                                     | 97.32559279                      | 335.915612                                    | 0.029990344                                     |
| 0.86571879                                      | 149.6556572                      | 408.4571226                                   | 0.027783547                                     |
| 0.812485053                                     | 170.7691478                      | 693.8753692                                   | 0.023863386                                     |
| 0.914476301                                     | 99.87420785                      | 340.5308594                                   | 0.03113478                                      |
| 0.917846781                                     | 113.9963399                      | 435.7066495                                   | 0.02855139                                      |
| 0.908617797                                     | 111.5016427                      | 316.9577404                                   | 0.030077527                                     |
| 0.935735197                                     | 110.6089421                      | 458.4432723                                   | 0.027550991                                     |
| 0.861321129                                     | 82.39416723                      | 370.7319748                                   | 0.032688763                                     |
| 0.901407038                                     | 138.589246                       | 708.1898257                                   | 0.024908755                                     |
| 0.912771122                                     | 108.071558                       | 383.713386                                    | 0.030153238                                     |
| 0.927877727                                     | 78.49851279                      | 151.3658401                                   | 0.051160024                                     |
| 0.917537662                                     | 108.0469104                      | 354.7319006                                   | 0.033584368                                     |
| 0.876124377                                     | 105.5368512                      | 397.6195496                                   | 0.028806668                                     |
| 0.892967033                                     | 120.1708732                      | 338.918903                                    | 0.031848794                                     |
| 0.838922518                                     | 146.7576374                      | 457.2625457                                   | 0.027383544                                     |
| 0.902060599                                     | 83.19819336                      | 382.5198497                                   | 0.032128906                                     |
| 0.791374723                                     | 145.7023145                      | 576.6739464                                   | 0.029780767                                     |
| 0.903355096                                     | 167.4826552                      | 497.9909667                                   | 0.0238849                                       |
| 0.916966165                                     | 147.7622689                      | 524.2999006                                   | 0.024729513                                     |
| 0.918353624                                     | 132.4814907                      | 342.1930581                                   | 0.030423543                                     |
| 0.884535644                                     | 143.1169459                      | 554.9372878                                   | 0.025786036                                     |
| 0.916742711                                     | 98.28603158                      | 531.2601175                                   | 0.031929547                                     |
| 0.896922263                                     | 118.9554004                      | 455.2807603                                   | 0.027178096                                     |
| 0.843592201                                     | 134.9055736                      | 557.7147726                                   | 0.026792908                                     |
| 0.854420231                                     | 100.6398825                      | 483.7371946                                   | 0.03075505                                      |
| 0.753952781                                     | 179.5837315                      | 617.9680622                                   | 0.026279332                                     |
| 0.887789441                                     | 115.1565503                      | 360.9470149                                   | 0.032550065                                     |
| 0.884421702                                     | 163.0000829                      | 509.0070696                                   | 0.025038403                                     |
| 0.93005629                                      | 102.9133298                      | 370.9603628                                   | 0.032585327                                     |
| 0.87362939                                      | 134.5592834                      | 496.7466358                                   | 0.027051078                                     |
| 0.922064716                                     | 99.05486281                      | 263.8237154                                   | 0.033626446                                     |
| 0.879653157                                     | 133.6286839                      | 517.0929626                                   | 0.027348139                                     |
| 0.897757539                                     | 136.7631862                      | 533.9630262                                   | 0.024935975                                     |
| 0.89971181                                      | 109.0279038                      | 373.0456726                                   | 0.028189635                                     |
| 0.814124404                                     | 107.5473812                      | 447.081659                                    | 0.028613663                                     |
| 0.829514807                                     | 112.8016953                      | 492.0778414                                   | 0.028935051                                     |
| 0.863379605                                     | 189.7964599                      | 862.8949776                                   | 0.02186316                                      |
| 0.930660361                                     | 151.4953124                      | 509.6638235                                   | 0.024857499                                     |
| 0.928494805                                     | 115.3161866                      | 378.7756221                                   | 0.029144913                                     |
| 0.906187899                                     | 95.26909481                      | 374.567948                                    | 0.030299205                                     |
| 0.904892888                                     | 127.2149128                      | 493.8534351                                   | 0.025679012                                     |
| 0.844730661                                     | 102.0415327                      | 485.0688571                                   | 0.029803014                                     |
| 0.937801628                                     | 204.7384169                      | 720.6144613                                   | 0.021793334                                     |
| 0.942495217                                     | 164.3776356                      | 587.1947342                                   | 0.023617307                                     |
| 0.899191796                                     | 214.1443459                      | 649.6597941                                   | 0.023379265                                     |
| 0.923639757                                     | 85.40078386                      | 221.3574504                                   | 0.045434751                                     |
| 0.880076144                                     | 83.74626017                      | 403.544391                                    | 0.030403385                                     |
| 0.839592129                                     | 115.779053                       | 616.6503133                                   | 0.027888076                                     |
| 0.895054118                                     | 95.80381749                      | 416.1814752                                   | 0.029268442                                     |
| 0.923516132                                     | 133.6853391                      | 404.1570166                                   | 0.028388469                                     |
| 0.833055885                                     | 173.9555556                      | 397.9997218                                   | 0.045688889                                     |
| 0.93971569                                      | 96.53728208                      | 285.8589726                                   | 0.043058181                                     |
| 0.854218882                                     | 194.5938464                      | 611.6103336                                   | 0.02365987                                      |
| 0.905698755                                     | 199.5785174                      | 813.5363243                                   | 0.021896739                                     |
| 0.854798999                                     | 124.8543351                      | 434.6789959                                   | 0.027675956                                     |
| 0.846988886                                     | 134.7920318                      | 659.0109823                                   | 0.026014269                                     |
| 0.860385398                                     | 109.5531064                      | 563.8377769                                   | 0.029215968                                     |
| 0.918362528                                     | 209.3560938                      | 661.0450733                                   | 0.0240625                                       |
| 0.897911679                                     | 188.2572663                      | 517.7228238                                   | 0.026327671                                     |
| 0.934985258                                     | 105.2129249                      | 235.9924005                                   | 0.03947569                                      |
| 0.908737437                                     | 59.6500377                       | 202.0736456                                   | 0.039494769                                     |
| 0.863571659                                     | 168.2359018                      | 719.691774                                    | 0.026566387                                     |

| original_glszm_SizeZoneNonUniformityNormalized | original_glszm_SizeZoneNonUniformity | original_glszm_GrayLevelNonUniformity | original_glszm_LargeAreaEmphasis | original_glszm_ZoneVariance | original_glszm_ZonePercentage |
|------------------------------------------------|--------------------------------------|---------------------------------------|----------------------------------|-----------------------------|-------------------------------|
| 0.658246759                                    | 251.4502618                          | 10.81675393                           | 56.44502618                      | 53.02930292                 | 0.541076487                   |
| 0.547248117                                    | 413.7195767                          | 20.92328042                           | 286.702381                       | 279.1544242                 | 0.363986519                   |
| 0.625942445                                    | 157.1115538                          | 7.12749004                            | 14.77290037                      | 11.78317804                 | 0.578341014                   |
| 0.556736417                                    | 791.1224449                          | 33.6052076                            | 62.11893033                      | 58.68039823                 | 0.539278937                   |
| 0.508464198                                    | 114.4044444                          | 8.013333333                           | 3.782222222                      | 1.236424691                 | 0.626740947                   |
| 0.569209594                                    | 231.6683047                          | 12.46928747                           | 5.83046683                       | 3.334532656                 | 0.632970451                   |
| 0.453258818                                    | 75.24096386                          | 8.012048193                           | 8.620481928                      | 4.499092757                 | 0.492581602                   |
| 0.535242634                                    | 309.3702422                          | 17.10726644                           | 14.46020765                      | 11.45496342                 | 0.576846307                   |
| 0.511673624                                    | 564.8876812                          | 29.48188406                           | 17.10960141                      | 13.56333934                 | 0.531024531                   |
| 0.526439804                                    | 749.6502809                          | 40.0491573                            | 191.8047753                      | 187.0717061                 | 0.459651388                   |
| 0.48926276                                     | 225.0608696                          | 15.16521739                           | 13.31086957                      | 10.07869093                 | 0.556227328                   |
| 0.570902599                                    | 405.3408451                          | 17.15211268                           | 69.54084507                      | 65.18392382                 | 0.479082321                   |
| 0.457654099                                    | 522.6409807                          | 34.76532399                           | 7.802101576                      | 4.503838474                 | 0.550626808                   |
| 0.495716872                                    | 334.6088889                          | 20.68                                 | 6.444444444                      | 3.701127023                 | 0.603756708                   |
| 0.505602082                                    | 285.1595745                          | 15.57446809                           | 4.179078014                      | 1.57005118                  | 0.61909989                    |
| 0.487646185                                    | 824.6096984                          | 53.04021289                           | 2583.449438                      | 2566.571967                 | 0.243414423                   |
| 0.493391776                                    | 209.1981132                          | 12.62264151                           | 4.830188679                      | 2.120127269                 | 0.607449857                   |
| 0.516230949                                    | 582.3085106                          | 31.08687943                           | 84.94326241                      | 80.66921936                 | 0.483704974                   |
| 0.528851227                                    | 185.6267806                          | 11.02849003                           | 4.894586895                      | 2.145226094                 | 0.603092784                   |
| 0.514374266                                    | 566.3260672                          | 32.61489555                           | 507.715713                       | 501.2435182                 | 0.393073902                   |
| 0.544249855                                    | 1184.287684                          | 70.48529412                           | 968.4981618                      | 962.7346318                 | 0.416539051                   |
| 0.544496696                                    | 576.0775047                          | 30.85066163                           | 6.344045369                      | 3.70115991                  | 0.615116279                   |
| 0.53626044                                     | 707.3275208                          | 41.6808188                            | 173.4230478                      | 169.1360445                 | 0.48297327                    |
| 0.516887463                                    | 146.2791519                          | 8.16607739                            | 8.16607739                       | 5.692579505                 | 0.588357588                   |
| 0.573391964                                    | 341.7416107                          | 18.83892617                           | 30.17449664                      | 26.09355434                 | 0.495016611                   |
| 0.524274691                                    | 188.7388889                          | 10.16111111                           | 34.01111111                      | 30.29478395                 | 0.518731988                   |
| 0.509393676                                    | 643.3642122                          | 36.8669337                            | 469.5851148                      | 462.0541535                 | 0.364396999                   |
| 0.532124225                                    | 359.7159763                          | 20.54142012                           | 20.54142012                      | 64.74747689                 | 0.471737613                   |
| 0.579028873                                    | 590.030422                           | 26.78802748                           | 15.01766438                      | 12.01752762                 | 0.57733711                    |
| 0.572651119                                    | 545.1638655                          | 26.13655462                           | 418.3214286                      | 411.1916311                 | 0.374508261                   |
| 0.542987919                                    | 790.0474227                          | 43.58556701                           | 228.5491409                      | 223.7754415                 | 0.457691098                   |
| 0.478853586                                    | 1349.888258                          | 78.86023413                           | 54.0297978                       | 49.60473707                 | 0.475379427                   |
| 0.530843321                                    | 525.0040445                          | 25.22649141                           | 118.2113246                      | 113.985785                  | 0.488473192                   |
| 0.513846154                                    | 33.4                                 | 3.461538462                           | 3.938461538                      | 1.378461538                 | 0.625                         |
| 0.599091401                                    | 128.8046512                          | 6.125581395                           | 5.088372093                      | 2.703861547                 | 0.647590361                   |
| 0.517572194                                    | 567.2591241                          | 30.59306569                           | 33.89233577                      | 30.49544462                 | 0.542574257                   |
| 0.587996343                                    | 756.163297                           | 31.96111975                           | 399.1244168                      | 394.1090461                 | 0.446527778                   |
| 0.518626519                                    | 858.3268882                          | 45.76616314                           | 143.4706949                      | 139.3636436                 | 0.493440668                   |
| 0.458475806                                    | 212.2742981                          | 13.88552916                           | 5.933045356                      | 2.68059281                  | 0.554491018                   |
| 0.607763764                                    | 323.9380863                          | 14.80863039                           | 90.55347092                      | 86.68003337                 | 0.508102955                   |
| 0.520328652                                    | 321.5631068                          | 14.74757282                           | 196.368932                       | 190.6801667                 | 0.4192673                     |
| 0.544446707                                    | 307.6123894                          | 17.59115044                           | 14.20353982                      | 11.35849636                 | 0.592864638                   |
| 0.508971337                                    | 472.325431                           | 26.49568966                           | 10.50431034                      | 7.373546188                 | 0.565164434                   |
| 0.530775178                                    | 308.3803787                          | 17.47504303                           | 9.788296041                      | 6.675895616                 | 0.566829268                   |
| 0.519619362                                    | 613.1508475                          | 32.51016949                           | 4.138983051                      | 1.606029876                 | 0.628328009                   |
| 0.526101798                                    | 532.4150198                          | 33.08102767                           | 171.5197628                      | 166.6728038                 | 0.454219031                   |
| 0.525021643                                    | 1202.299563                          | 57.04104803                           | 47.12751092                      | 43.65718121                 | 0.536802625                   |
| 0.572785977                                    | 204.4845938                          | 10.76470588                           | 12.00840336                      | 9.341540538                 | 0.612349914                   |
| 0.497620464                                    | 40.80487805                          | 4.195121951                           | 3.804878049                      | 1.134443783                 | 0.611940299                   |
| 0.512673459                                    | 148.1626298                          | 9.705882353                           | 6.633217993                      | 3.675770166                 | 0.581488934                   |
| 0.503537415                                    | 834.3614967                          | 47.73264937                           | 125.4628847                      | 121.1929376                 | 0.483936916                   |
| 0.551166573                                    | 241.4109589                          | 13.94977169                           | 35.54109589                      | 31.9760691                  | 0.529625151                   |
| 0.538781192                                    | 863.6662508                          | 43.89582034                           | 379.6887087                      | 374.0068944                 | 0.419523685                   |
| 0.535488281                                    | 171.35625                            | 10.28125                              | 16.903125                        | 13.49217773                 | 0.541455161                   |
| 0.536376645                                    | 1058.807497                          | 58.78723404                           | 1642.363222                      | 1631.44378                  | 0.302621493                   |
| 0.581060263                                    | 309.1240602                          | 12.70676692                           | 15.08458647                      | 12.35463777                 | 0.60523322                    |
| 0.530528641                                    | 676.9545455                          | 31.55485893                           | 8.210815047                      | 5.257050221                 | 0.581851345                   |
| 0.47995755                                     | 354.2086721                          | 22.45257453                           | 6.277777778                      | 3.208159826                 | 0.570765661                   |
| 0.551574975                                    | 228.9036145                          | 10.70120482                           | 32.28433735                      | 28.43706779                 | 0.50982801                    |
| 0.505896937                                    | 243.8423237                          | 15.39004149                           | 15.39004149                      | 5.611426284                 | 0.547105562                   |
| 0.53945059                                     | 613.353521                           | 30.90149516                           | 50.41600704                      | 46.94271753                 | 0.536573856                   |
| 0.525164245                                    | 1288.753056                          | 65.74979625                           | 489.5183374                      | 484.5352909                 | 0.447973713                   |
| 0.489255573                                    | 618.9083004                          | 38.90513834                           | 149.2031621                      | 143.2364386                 | 0.409385113                   |
| 0.559408653                                    | 450.8833747                          | 21.18114144                           | 667.5                            | 656.0191692                 | 0.551229989                   |
| 0.542935086                                    | 68.95275591                          | 4.133858268                           | 8.275590551                      | 5.356066712                 | 0.585253456                   |
| 0.510110069                                    | 384.1128818                          | 18.85391766                           | 46.9309429                       | 42.67737902                 | 0.484867997                   |
| 0.523078474                                    | 127.6311475                          | 7.950819672                           | 4.262295082                      | 1.654846284                 | 0.61928934                    |
| 0.565773264                                    | 895.6190777                          | 42.82185723                           | 181.4725205                      | 177.3938048                 | 0.495151705                   |
| 0.552581818                                    | 151.96                               | 9.247272727                           | 8.458181818                      | 5.827887603                 | 0.616591928                   |
| 0.551317007                                    | 542.495935                           | 26.91056911                           | 85.31199187                      | 81.1352855                  | 0.489308802                   |
| 0.520598493                                    | 805.3658694                          | 38.57595346                           | 26.12281836                      | 22.26122499                 | 0.508881579                   |
| 0.522768759                                    | 318.3661741                          | 17.16748768                           | 21.72577997                      | 18.28898757                 | 0.539415412                   |
| 0.549965219                                    | 1152.727099                          | 59.97423664                           | 820.9780534                      | 814.8986292                 | 0.405572755                   |
| 0.53718078                                     | 1387.000775                          | 74.71030209                           | 899.468629                       | 892.7029888                 | 0.384455033                   |
| 0.528139326                                    | 2093.016149                          | 86.64370426                           | 310.0893263                      | 304.7234925                 | 0.431699346                   |
| 0.525755951                                    | 368.5549215                          | 17.42510699                           | 4.47360913                       | 1.939108793                 | 0.628136201                   |
| 0.556959142                                    | 378.1752577                          | 19.78939617                           | 6.328424153                      | 3.622181108                 | 0.607878245                   |
| 0.554412322                                    | 197.3707865                          | 10.78651685                           | 11.37078652                      | 8.434762025                 | 0.583606557                   |
| 0.550629528                                    | 545.1232323                          | 25.42222222                           | 35.2969697                       | 32.12209366                 | 0.56122449                    |
| 0.555029752                                    | 730.9741838                          | 39.25056948                           | 180.1442673                      | 175.4744677                 | 0.462754743                   |
| 0.645720237                                    | 229.8764045                          | 7.758426966                           | 4.191011236                      | 2.186718849                 | 0.706349206                   |
| 0.573887545                                    | 525.1071038                          | 21.60983607                           | 3.404371585                      | 1.526465108                 | 0.682326622                   |
| 0.550266371                                    | 817.6958277                          | 34.74158816                           | 26.60296097                      | 23.07281057                 | 0.532234957                   |
| 0.466686021                                    | 38.73493976                          | 3.771084337                           | 5.21686747                       | 2.164900566                 | 0.572413793                   |
| 0.531950948                                    | 888.3580838                          | 50.77365269                           | 74.75389222                      | 70.6308039                  | 0.492480094                   |
| 0.482772252                                    | 1057.271233                          | 61.07488854                           | 408.0767123                      | 401.824429                  | 0.399926954                   |
| 0.607675928                                    | 268.5927602                          | 12.93665158                           | 27.760181                        | 24.66194386                 | 0.568123393                   |
| 0.512844991                                    | 471.8173913                          | 26.1173913                            | 5.795652174                      | 2.949829868                 | 0.592783505                   |
| 0.497244444                                    | 37.29333333                          | 3.426666667                           | 25.13333333                      | 19.17973333                 | 0.409836066                   |
| 0.631590002                                    | 43.57971014                          | 2.971014493                           | 4.594202899                      | 2.78512917                  | 0.657142857                   |
| 0.522916472                                    | 896.8017493                          | 40.57667638                           | 206.7504373                      | 201.3783135                 | 0.431446541                   |
| 0.654865409                                    | 275.6983373                          | 9.218527316                           | 14.08551069                      | 11.27331712                 | 0.59631728                    |
| 0.514579381                                    | 239.7939914                          | 12.89699571                           | 54.51502146                      | 49.7051889                  | 0.455968689                   |
| 0.543015044                                    | 987.744365                           | 47.31995602                           | 307.0610225                      | 302.0053234                 | 0.444743276                   |
| 0.537000734                                    | 1333.909823                          | 72.57246377                           | 432.8204509                      | 427.3572033                 | 0.427833276                   |
| 0.589140625                                    | 94.2625                              | 3.85                                  | 4.53125                          | 2.03898438                  | 0.632411067                   |
| 0.496718895                                    | 321.3771252                          | 17.03400309                           | 13.68160742                      | 10.14929923                 | 0.532072368                   |
| 0.563481177                                    | 45.64197531                          | 3.197530864                           | 3.666666667                      | 1.360768176                 | 0.658536585                   |
| 0.472099161                                    | 97.25242718                          | 8.13592233                            | 7.208737864                      | 3.823852389                 | 0.54353562                    |
| 0.54153679                                     | 202.5347594                          | 9.935828877                           | 25.18983957                      | 20.5339372                  | 0.463444857                   |

| original_glszm_LargeAreaLowGrayLevelEmphasis | original_glszm_LargeAreaHighGrayLevelEmphasis | original_glszm_HighGrayLevelZoneEmphasis | original_glszm_SmallAreaEmphasis | original_glszm_LowGrayLevelZoneEmphasis |
|----------------------------------------------|-----------------------------------------------|------------------------------------------|----------------------------------|-----------------------------------------|
| 0.042337398                                  | 99869.37696                                   | 684.0602094                              | 0.837465082                      | 0.006684073                             |
| 0.287221608                                  | 416351.0384                                   | 636.5701058                              | 0.76744038                       | 0.010737443                             |
| 0.020422395                                  | 22766.85657                                   | 739.752988                               | 0.817754471                      | 0.008534019                             |
| 0.064451691                                  | 110419.1217                                   | 768.2744546                              | 0.774323775                      | 0.008749917                             |
| 0.093491133                                  | 1115.64                                       | 309.1377778                              | 0.741290123                      | 0.023761718                             |
| 0.031321523                                  | 5095.022113                                   | 428.5601966                              | 0.782417845                      | 0.012599672                             |
| 0.234782346                                  | 666.1506024                                   | 186.4578313                              | 0.699660161                      | 0.027051721                             |
| 0.135194925                                  | 17572.16955                                   | 460.733564                               | 0.759978121                      | 0.021223073                             |
| 0.026883281                                  | 24945.10326                                   | 794.7871377                              | 0.743390009                      | 0.006492434                             |
| 0.123017426                                  | 318548.1819                                   | 878.2401685                              | 0.753728621                      | 0.004570205                             |
| 0.05346003                                   | 14282.71739                                   | 382.7695652                              | 0.726839356                      | 0.01306845                              |
| 0.049331078                                  | 119321.6507                                   | 969.1661972                              | 0.783470571                      | 0.005677024                             |
| 0.052306902                                  | 6059.562172                                   | 454.6716287                              | 0.703341395                      | 0.011825225                             |
| 0.039835642                                  | 5403.127407                                   | 463.7185185                              | 0.730757199                      | 0.009901309                             |
| 0.02410185                                   | 2431.85461                                    | 605                                      | 0.738890292                      | 0.007317673                             |
| 1.591126696                                  | 4366248.04                                    | 894.9432289                              | 0.726011603                      | 0.005243432                             |
| 0.04278108                                   | 3314.542453                                   | 456.6509434                              | 0.728768692                      | 0.012164905                             |
| 0.093082038                                  | 126206.9122                                   | 605.3643617                              | 0.746680773                      | 0.008483092                             |
| 0.135803858                                  | 2511.207977                                   | 368.9373219                              | 0.755267769                      | 0.02254529                              |
| 0.374967085                                  | 729959.7875                                   | 611.5349682                              | 0.744536185                      | 0.00618947                              |
| 0.68099218                                   | 1392144.961                                   | 686.0206801                              | 0.766090198                      | 0.004072751                             |
| 0.009313758                                  | 9113.932892                                   | 918.8412098                              | 0.766314047                      | 0.00321469                              |
| 0.149756474                                  | 231766.6444                                   | 573.0742987                              | 0.760802209                      | 0.006695199                             |
| 0.119273656                                  | 3681.922261                                   | 491.335689                               | 0.747008238                      | 0.015676489                             |
| 0.023155555                                  | 48378.91443                                   | 899.8926174                              | 0.784792851                      | 0.004102535                             |
| 0.096327791                                  | 45005.15556                                   | 587.875                                  | 0.752079107                      | 0.023428988                             |
| 0.429404491                                  | 533421.791                                    | 676.7339667                              | 0.741866796                      | 0.007140545                             |
| 0.074620107                                  | 94568.30917                                   | 661.0754438                              | 0.757513039                      | 0.009027503                             |
| 0.109357554                                  | 20025.78705                                   | 583.703631                               | 0.78836739                       | 0.014269697                             |
| 0.274511412                                  | 697145.7773                                   | 754.5367647                              | 0.784645147                      | 0.007346771                             |
| 0.171272281                                  | 327719.8976                                   | 686.8151203                              | 0.765313631                      | 0.005844314                             |
| 0.043640035                                  | 86723.8989                                    | 788.203973                               | 0.719027749                      | 0.003537426                             |
| 0.141183135                                  | 184794.4338                                   | 675.7815976                              | 0.756775116                      | 0.011399291                             |
| 0.376234784                                  | 365.8615385                                   | 210.0769231                              | 0.744920809                      | 0.048641444                             |
| 0.031681135                                  | 5381.702326                                   | 578.3023256                              | 0.799753441                      | 0.012157901                             |
| 0.080807674                                  | 48605.06022                                   | 531.2755474                              | 0.747629839                      | 0.009001826                             |
| 0.226813928                                  | 768270.9596                                   | 796.0046656                              | 0.794902954                      | 0.006905336                             |
| 0.11701806                                   | 206168.3408                                   | 673.0193353                              | 0.748216414                      | 0.006360727                             |
| 0.052604772                                  | 2989.343413                                   | 477.6177106                              | 0.703614522                      | 0.01387709                              |
| 0.25108729                                   | 113135.9531                                   | 481.2645403                              | 0.807385266                      | 0.038070101                             |
| 0.132179026                                  | 337251.2508                                   | 936.2135922                              | 0.749202104                      | 0.007031081                             |
| 0.059295053                                  | 16769.99115                                   | 433.8902655                              | 0.766306738                      | 0.011718913                             |
| 0.047525439                                  | 11440.52155                                   | 588.7478448                              | 0.741455554                      | 0.006471965                             |
| 0.23310894                                   | 8511.333907                                   | 416.4578313                              | 0.756698298                      | 0.023339014                             |
| 0.023285846                                  | 2516.266102                                   | 608.7686441                              | 0.749210918                      | 0.006193702                             |
| 0.168716952                                  | 191453.4812                                   | 519.0059289                              | 0.753408907                      | 0.008458467                             |
| 0.034555217                                  | 84674.43799                                   | 932.5244541                              | 0.752910075                      | 0.003273169                             |
| 0.046229842                                  | 15408.31373                                   | 497.0560224                              | 0.785176629                      | 0.012070811                             |
| 0.391575911                                  | 600.402439                                    | 195.2439024                              | 0.728702575                      | 0.091115042                             |
| 0.059542729                                  | 4649.550173                                   | 459.7716263                              | 0.743237811                      | 0.016144203                             |
| 0.121867768                                  | 168114.2263                                   | 557.092939                               | 0.737050273                      | 0.008144065                             |
| 0.139385072                                  | 45333.03653                                   | 422.1210046                              | 0.770792478                      | 0.020876425                             |
| 0.368391904                                  | 509738.6781                                   | 589.9875234                              | 0.762455782                      | 0.014219246                             |
| 0.030895742                                  | 18819.2375                                    | 514.409375                               | 0.759811643                      | 0.009104034                             |
| 1.164903911                                  | 2502636.882                                   | 783.1752786                              | 0.760355535                      | 0.007655545                             |
| 0.62457574                                   | 21545.15226                                   | 644.3139098                              | 0.790402378                      | 0.030754345                             |
| 0.047716693                                  | 8568.241379                                   | 711.4153605                              | 0.756699675                      | 0.007110821                             |
| 0.206832086                                  | 1236.474255                                   | 430.7222222                              | 0.719078952                      | 0.024109304                             |
| 0.044707431                                  | 51726.6747                                    | 722.8240964                              | 0.771049674                      | 0.008509601                             |
| 0.033450102                                  | 9500.458506                                   | 722.4564315                              | 0.739290131                      | 0.005449857                             |
| 0.054932092                                  | 75167.31926                                   | 617.4582234                              | 0.762716553                      | 0.007841513                             |
| 0.307732375                                  | 898398.3839                                   | 729.299511                               | 0.752887548                      | 0.005293017                             |
| 0.128249557                                  | 191367.5921                                   | 679.1849802                              | 0.727069047                      | 0.006156486                             |
| 0.682316287                                  | 761074.6675                                   | 786.5397022                              | 0.774981268                      | 0.010220127                             |
| 0.064819091                                  | 7781.755906                                   | 492.1889764                              | 0.763658804                      | 0.026216614                             |
| 0.06355143                                   | 81301.50996                                   | 711.3559097                              | 0.742405517                      | 0.01237255                              |
| 0.04236132                                   | 2394.557377                                   | 522.1557377                              | 0.751568878                      | 0.010616954                             |
| 0.139257931                                  | 301036.2097                                   | 643.1857233                              | 0.780560531                      | 0.006976437                             |
| 0.083776734                                  | 8169.945455                                   | 346.5163636                              | 0.771874489                      | 0.035052861                             |
| 0.074022043                                  | 137643.9024                                   | 680.0193089                              | 0.770886943                      | 0.007386512                             |
| 0.035263149                                  | 38288.41888                                   | 743.6354234                              | 0.749624663                      | 0.007415474                             |
| 0.05399623                                   | 27860.22824                                   | 508.8965517                              | 0.75098789                       | 0.011125661                             |
| 0.608046416                                  | 1163004.614                                   | 592.3454198                              | 0.769938675                      | 0.007669072                             |
| 0.660791464                                  | 1282343.175                                   | 678.4566228                              | 0.761291513                      | 0.00746692                              |
| 0.185784138                                  | 551614.8082                                   | 1140.700984                              | 0.754929719                      | 0.004415637                             |
| 0.032071113                                  | 3946.827389                                   | 667.2582026                              | 0.753299143                      | 0.008789893                             |
| 0.045939802                                  | 5652.455081                                   | 498.5876289                              | 0.774544375                      | 0.013360555                             |
| 0.039688826                                  | 13011.63764                                   | 498.4213483                              | 0.772573353                      | 0.010730451                             |
| 0.056501547                                  | 54964.59293                                   | 652.8747475                              | 0.770606534                      | 0.009039238                             |
| 0.14059775                                   | 278197.8679                                   | 620.0273349                              | 0.773448751                      | 0.005918601                             |
| 0.018206812                                  | 6138.252809                                   | 883.6629213                              | 0.830570824                      | 0.00901894                              |
| 0.018643055                                  | 3163.375956                                   | 755.0535519                              | 0.786227248                      | 0.006865459                             |
| 0.064877141                                  | 48944.22275                                   | 869.1736205                              | 0.770136386                      | 0.013573822                             |
| 0.168146885                                  | 735.686747                                    | 277.373494                               | 0.708973839                      | 0.033007812                             |
| 0.147025886                                  | 90755.9988                                    | 548.8329341                              | 0.757663341                      | 0.009463907                             |
| 0.269849613                                  | 641048.6479                                   | 859.3497717                              | 0.722430917                      | 0.003531265                             |
| 0.046988024                                  | 36614.46833                                   | 523.6945701                              | 0.807396128                      | 0.011810495                             |
| 0.041292335                                  | 5407.330435                                   | 547.4097826                              | 0.744171078                      | 0.009624577                             |
| 0.147414529                                  | 22265.34667                                   | 524.8933333                              | 0.730792212                      | 0.032991708                             |
| 0.162013852                                  | 511.0869565                                   | 308.2608696                              | 0.820268728                      | 0.038097918                             |
| 0.198598583                                  | 291226.9079                                   | 786.3172012                              | 0.751356702                      | 0.010349617                             |
| 0.017992057                                  | 26173.90499                                   | 1020.04038                               | 0.834950105                      | 0.008870493                             |
| 0.077171682                                  | 76504.72747                                   | 597.776824                               | 0.745374881                      | 0.012868687                             |
| 0.206113492                                  | 493960.5327                                   | 860.6190214                              | 0.765343976                      | 0.0036306                               |
| 0.29758886                                   | 647511.7983                                   | 764.0394525                              | 0.761130297                      | 0.003764261                             |
| 0.034980966                                  | 5876.6375                                     | 871.775                                  | 0.79325825                       | 0.019046033                             |
| 0.062401447                                  | 15109.11128                                   | 644.8423493                              | 0.732490874                      | 0.010918555                             |
| 0.133793995                                  | 1077.37037                                    | 315.6419753                              | 0.778166152                      | 0.053517446                             |
| 0.265239018                                  | 1071.878641                                   | 253.6165049                              | 0.713418561                      | 0.025148832                             |
| 0.022749962                                  | 44627.36898                                   | 1065.510695                              | 0.763209915                      | 0.007666394                             |

| original_glszm_ZoneEntropy | original_glszm_SmallAreaLowGrayLevelEmphasis | original_ngtdm_Coarseness | original_ngtdm_Complexity | original_ngtdm_Strength | original_ngtdm_Busyness | original_ngtdm_Contrast |
|----------------------------|----------------------------------------------|---------------------------|---------------------------|-------------------------|-------------------------|-------------------------|
| 5.998991163                | 0.00602867                                   | 0.004458057               | 7.256683767               | 6.442266774             | 0.161495375             | 0.001660059             |
| 6.394750243                | 0.008290915                                  | 0.001973481               | 2.058503921               | 3.496998508             | 0.271327719             | 0.000316984             |
| 5.991025081                | 0.007990866                                  | 0.010765113               | 10.22027374               | 10.41440034             | 0.06635998              | 0.001996454             |
| 6.709535333                | 0.006976275                                  | 0.001498979               | 5.064190457               | 4.457652652             | 0.299005316             | 0.000257148             |
| 5.969458489                | 0.017774217                                  | 0.016592562               | 7.931233664               | 10.17549014             | 0.216202018             | 0.001663798             |
| 6.103060331                | 0.010944085                                  | 0.009692978               | 4.491751539               | 5.003250838             | 0.201464691             | 0.001246705             |
| 5.828302462                | 0.01910362                                   | 0.014423851               | 4.079735328               | 6.813928831             | 0.320847002             | 0.00089017              |
| 6.299257865                | 0.013806934                                  | 0.003658475               | 5.194824224               | 3.41271953              | 0.378659728             | 0.001576183             |
| 6.656822886                | 0.005572032                                  | 0.002584584               | 4.005220278               | 4.25158987              | 0.205354014             | 0.000252446             |
| 6.624559381                | 0.003881365                                  | 0.001479568               | 3.127710428               | 4.470396211             | 0.221712693             | 8.72E-05                |
| 6.266587196                | 0.010056522                                  | 0.005784359               | 4.245318304               | 3.740348118             | 0.309749664             | 0.001165878             |
| 6.637359074                | 0.004836566                                  | 0.003198299               | 8.415159167               | 10.51999326             | 0.097713297             | 0.0002288               |
| 6.610620903                | 0.009435734                                  | 0.003471165               | 1.195834717               | 1.733603519             | 0.542473992             | 0.00031047              |
| 6.345645228                | 0.007810502                                  | 0.006081855               | 2.505759705               | 3.318428632             | 0.261728437             | 0.000597171             |
| 6.495264426                | 0.005730288                                  | 0.007773566               | 4.945922668               | 5.69722584              | 0.166500953             | 0.00057664              |
| 6.665377324                | 0.003791235                                  | 0.008087543               | 0.40487794                | 2.050747413             | 0.462445898             | 3.59E-05                |
| 6.277620467                | 0.00889776                                   | 0.008583814               | 5.244477147               | 5.620272739             | 0.2146216               | 0.00116835              |
| 6.562356331                | 0.006450245                                  | 0.002152968               | 2.586524307               | 3.220667386             | 0.276630268             | 0.000266127             |
| 6.208428034                | 0.010510346                                  | 0.010017041               | 5.671993143               | 6.199877089             | 0.252025665             | 0.001486078             |
| 6.429228521                | 0.004684256                                  | 0.001646705               | 1.082026554               | 2.595959256             | 0.35347143              | 0.000169218             |
| 6.304137374                | 0.003357141                                  | 0.00674551                | 0.568449631               | 1.052928172             | 0.923081899             | 9.61E-05                |
| 6.428707255                | 0.002753331                                  | 0.003828477               | 2.877941216               | 3.466731992             | 0.184826825             | 0.000271535             |
| 6.31166434                 | 0.004932135                                  | 0.010789043               | 1.151940773               | 1.742822191             | 0.431457644             | 0.000218593             |
| 6.253695958                | 0.010270317                                  | 0.010758297               | 10.03151544               | 10.37119868             | 0.170504451             | 0.002081483             |
| 6.198348968                | 0.003756677                                  | 0.004144567               | 3.075666484               | 4.624461418             | 0.1387562               | 0.000394796             |
| 6.311874418                | 0.01754028                                   | 0.006114014               | 6.895637184               | 6.525975241             | 0.121603144             | 0.001487141             |
| 6.680393189                | 0.005757485                                  | 0.001429441               | 1.707767935               | 3.751450936             | 0.287349552             | 5.37E-05                |
| 6.284903497                | 0.006984609                                  | 0.002786916               | 2.686278868               | 3.395639434             | 0.22909105              | 0.000495478             |
| 6.438265663                | 0.010637355                                  | 0.002232852               | 3.473936481               | 2.565951741             | 0.530062804             | 0.00082459              |
| 6.407597541                | 0.005066564                                  | 0.001612587               | 1.558693875               | 3.15753453              | 0.297156184             | 0.000251611             |
| 6.384955616                | 0.004847946                                  | 0.00127108                | 1.133491579               | 1.677087812             | 0.49366331              | 0.000188366             |
| 6.728408183                | 0.002673265                                  | 0.00114568                | 0.661273829               | 1.414331005             | 0.48980858              | 6.84E-05                |
| 6.675933123                | 0.008718886                                  | 0.001696921               | 6.249452156               | 6.120536176             | 0.272534051             | 0.000314062             |
| 5.241920798                | 0.032147455                                  | 0.023841852               | 25.19099504               | 18.38126279             | 0.29799681              | 0.010275488             |
| 5.997117913                | 0.009525938                                  | 0.013293536               | 17.2056523                | 11.51290151             | 0.091266553             | 0.003444775             |
| 6.49562935                 | 0.006219894                                  | 0.002487104               | 2.107115697               | 2.252470339             | 0.515540981             | 0.000486544             |
| 6.525796514                | 0.00553181                                   | 0.000943281               | 3.351531878               | 3.25950597              | 0.384663337             | 0.000240709             |
| 6.623971828                | 0.004676341                                  | 0.001543389               | 2.845698668               | 3.898625614             | 0.274669829             | 9.78E-05                |
| 6.509939981                | 0.011623947                                  | 0.008042137               | 4.935345822               | 4.935361295             | 0.261289597             | 0.000796957             |
| 6.231356701                | 0.028623762                                  | 0.002847886               | 8.562702255               | 7.756270539             | 0.231346811             | 0.00078851              |
| 6.683894582                | 0.004988076                                  | 0.002870138               | 4.179764355               | 6.730593325             | 0.147717504             | 0.000331779             |
| 6.23361035                 | 0.008764256                                  | 0.004919022               | 4.177248916               | 3.901397691             | 0.32865974              | 0.001047089             |
| 6.482252902                | 0.004896866                                  | 0.002818274               | 3.037519931               | 2.581631747             | 0.470630959             | 0.000614968             |
| 6.325726321                | 0.014268773                                  | 0.004186326               | 4.478515562               | 3.649259463             | 0.41392898              | 0.001189565             |
| 6.559017098                | 0.004971089                                  | 0.003155855               | 2.48469322                | 2.383372295             | 0.483830426             | 0.000367568             |
| 6.290202884                | 0.007164136                                  | 0.00213533                | 1.305641562               | 1.938762963             | 0.366144733             | 0.000239482             |
| 6.788258485                | 0.002602357                                  | 0.001416544               | 3.573173664               | 4.364582473             | 0.237700531             | 7.17E-05                |
| 6.074135265                | 0.010303274                                  | 0.007856079               | 7.500527225               | 6.437632407             | 0.151859403             | 0.001894183             |
| 5.354639432                | 0.057974682                                  | 0.027338748               | 20.26097141               | 19.70015095             | 0.180519597             | 0.006474                |
| 6.191964012                | 0.013524738                                  | 0.008847437               | 9.588215344               | 8.952029022             | 0.178218474             | 0.00166465              |
| 6.548017823                | 0.006199933                                  | 0.001460485               | 1.041323942               | 1.443457217             | 0.561563175             | 0.00022204              |
| 6.162720872                | 0.014419002                                  | 0.003699852               | 6.457958595               | 4.400485134             | 0.323675418             | 0.001858481             |
| 6.608552131                | 0.010752566                                  | 0.000918486               | 2.748631841               | 3.228331034             | 0.474634278             | 0.000126092             |
| 6.104592574                | 0.007886068                                  | 0.010741132               | 4.61982641                | 6.85653486              | 0.106103991             | 0.001063422             |
| 6.604405654                | 0.005761879                                  | 0.000631878               | 0.664134174               | 1.674404648             | 0.614064595             | 5.79E-05                |
| 6.365855863                | 0.021857503                                  | 0.005046206               | 7.547121064               | 5.710474063             | 0.19236787              | 0.001795623             |
| 6.672267466                | 0.004991756                                  | 0.002173784               | 3.661823209               | 2.743802482             | 0.400394319             | 0.000428518             |
| 6.567684266                | 0.016219233                                  | 0.003900432               | 4.454263615               | 4.85307602              | 0.820808884             | 0.000517162             |
| 6.36486949                 | 0.005647083                                  | 0.007491163               | 7.156340178               | 9.657422705             | 0.077335087             | 0.00084359              |
| 6.380843576                | 0.002898084                                  | 0.00805608                | 6.327878561               | 11.70302833             | 0.077676553             | 0.000354271             |
| 6.483360268                | 0.006460238                                  | 0.002139089               | 2.454649953               | 2.316926406             | 0.370008314             | 0.000424484             |
| 6.63565658                 | 0.00358724                                   | 0.000596608               | 1.053935265               | 1.264866571             | 0.980181766             | 0.000170597             |
| 6.594132077                | 0.00496322                                   | 0.001914024               | 1.582884829               | 3.742629927             | 0.24439879              | 8.41E-05                |
| 6.634862926                | 0.007322494                                  | 0.001480962               | 2.633191009               | 6.2947766               | 0.245206448             | 7.93E-05                |
| 5.699017711                | 0.023362144                                  | 0.021367744               | 18.38514508               | 18.71835509             | 0.05257597              | 0.004322664             |
| 6.657536678                | 0.009138045                                  | 0.003449282               | 3.396050432               | 4.687610823             | 0.174865521             | 0.00588151              |
| 6.04948687                 | 0.006255327                                  | 0.011456359               | 13.2249681                | 9.372993169             | 0.137790391             | 0.002135522             |
| 6.468532932                | 0.005377005                                  | 0.010810116               | 1.76647937                | 1.704048686             | 0.637367232             | 0.000335967             |
| 6.005861465                | 0.028918751                                  | 0.010334971               | 8.998601038               | 7.707246319             | 0.158483607             | 0.002479094             |
| 6.465334326                | 0.0053391                                    | 0.001875497               | 3.005956646               | 2.869837011             | 0.336770614             | 0.000479761             |
| 6.71402197                 | 0.005791546                                  | 0.001745327               | 0.021664634               | 2.358782754             | 0.32126316              | 0.000212001             |
| 6.418936018                | 0.008858707                                  | 0.00426336                | 3.686855431               | 3.584489945             | 0.266492427             | 0.000929356             |
| 6.465299465                | 0.00595978                                   | 0.000756845               | 1.04331933                | 1.541231204             | 0.635212319             | 9.07E-05                |
| 6.519278812                | 0.006046661                                  | 0.000649435               | 0.51489037                | 1.040307326             | 0.83279994              | 7.83E-05                |
| 7.084252175                | 0.00357477                                   | 0.000676698               | 1.100572383               | 2.258389826             | 0.411690291             | 2.64E-05                |
| 6.596797299                | 0.006909474                                  | 0.004475604               | 5.972584095               | 4.511300456             | 0.287190974             | 0.00097648              |
| 6.296432507                | 0.010041853                                  | 0.004809934               | 3.600980715               | 3.439317062             | 0.289667671             | 0.000875509             |
| 6.084010917                | 0.008771334                                  | 0.006926862               | 6.563467043               | 5.299378307             | 0.164978641             | 0.001775524             |
| 6.488439942                | 0.00719565                                   | 0.00284464                | 2.965852979               | 2.796059599             | 0.285292314             | 0.000588415             |
| 6.338406495                | 0.004254384                                  | 0.01190105                | 1.550958969               | 1.608019211             | 0.643371617             | 0.000343511             |
| 6.335182667                | 0.007791988                                  | 0.010760213               | 20.30952944               | 14.95382676             | 0.069341309             | 0.002166972             |
| 6.574403                   | 0.005663958                                  | 0.003857868               | 6.805257293               | 4.584441679             | 0.257448528             | 0.000717263             |
| 6.728354721                | 0.010592068                                  | 0.01613721                | 3.461733215               | 3.845018126             | 0.28967415              | 0.000355456             |
| 5.525288528                | 0.016212773                                  | 0.029894293               | 16.8587519                | 19.92666058             | 0.109096358             | 0.004538986             |
| 6.421017555                | 0.005755467                                  | 0.01350831                | 1.098125111               | 1.337168095             | 0.59023663              | 0.000181688             |
| 6.83811077                 | 0.002839833                                  | 0.001132095               | 1.543268756               | 3.687335314             | 0.281329689             | 3.34E-05                |
| 6.096337044                | 0.009041981                                  | 0.00574157                | 5.240652852               | 5.100855337             | 0.171702769             | 0.001161169             |
| 6.528295268                | 0.007289371                                  | 0.003030193               | 3.657502377               | 3.001297616             | 0.4862942               | 0.000721102             |
| 5.373632484                | 0.025663302                                  | 0.018697235               | 17.14847781               | 26.45638358             | 0.059809974             | 0.008593014             |
| 5.195197645                | 0.031513297                                  | 0.021660518               | 31.95097                  | 19.07298496             | 0.168504226             | 0.011496897             |
| 6.911411076                | 0.007781815                                  | 0.001121821               | 3.171737939               | 4.383030458             | 0.329478736             | 9.66E-05                |
| 6.394277211                | 0.008385719                                  | 0.006410742               | 15.23875898               | 11.604002               | 0.068198102             | 0.001182371             |
| 6.437929008                | 0.010072557                                  | 0.004984084               | 4.573155072               | 6.170330122             | 0.128497355             | 0.000723686             |
| 6.685652227                | 0.002761562                                  | 0.001032736               | 2.556453162               | 3.488538922             | 0.331469766             | 7.49E-05                |
| 6.582827773                | 0.003064113                                  | 0.000811871               | 1.515276857               | 2.368307863             | 0.419657635             | 4.01E-05                |
| 6.118074174                | 0.017576421                                  | 0.016205265               | 36.63942827               | 22.11403023             | 0.045018945             | 0.006212513             |
| 6.698140927                | 0.00791739                                   | 0.005069923               | 8.597180268               | 14.78574123             | 0.138561846             | 0.000418682             |
| 5.320969447                | 0.049450951                                  | 0.02650117                | 29.33450635               | 20.28472405             | 0.098847904             | 0.010690953             |
| 5.912256338                | 0.016524422                                  | 0.016541969               | 4.621375209               | 7.589619506             | 0.241386274             | 0.001094283             |
| 6.456908612                | 0.007189765                                  | 0.006730328               | 6.848887039               | 10.05187217             | 0.063124769             | 0.00077616              |



| wavelet.LHL_gldm_GrayLevelVariance | wavelet.LHL_gldm_HighGrayLevelEmphasis | wavelet.LHL_gldm_GrayLevelNonUniformityNormalized | wavelet.LHL_gldm_DependenceEntropy | wavelet.LHL_gldm_DependenceNonUniformity |
|------------------------------------|----------------------------------------|---------------------------------------------------|------------------------------------|------------------------------------------|
| 75.34886124                        | 1004.562323                            | 0.038291777                                       | 6.693746429                        | 209.7790368                              |
| 33.6805163                         | 494.3480982                            | 0.061185754                                       | 6.898813859                        | 390.7717862                              |
| 57.65444159                        | 597.5207373                            | 0.042738219                                       | 6.251593508                        | 147.1474654                              |
| 98.73048965                        | 1704.169639                            | 0.03403044                                        | 6.985436433                        | 837.9085389                              |
| 41.35819865                        | 640.5849582                            | 0.050628099                                       | 6.135132592                        | 105.8579387                              |
| 40.96153093                        | 390.7620529                            | 0.045260721                                       | 6.334439297                        | 187.9642302                              |
| 45.39911419                        | 962.9317507                            | 0.046606028                                       | 6.143289559                        | 112.4599407                              |
| 97.39499942                        | 1497.513972                            | 0.02911343                                        | 6.73621366                         | 369.3173653                              |
| 76.85343645                        | 1948.133718                            | 0.036973644                                       | 6.824310547                        | 650.017797                               |
| 53.88248202                        | 1263.678179                            | 0.044237499                                       | 6.785773667                        | 836.9593286                              |
| 48.21590253                        | 727.0483676                            | 0.042655012                                       | 6.573530762                        | 232.2091898                              |
| 83.45139469                        | 1353.397436                            | 0.033967666                                       | 6.978553662                        | 422.6531714                              |
| 126.1612646                        | 2879.121504                            | 0.033287644                                       | 7.113007375                        | 591.8505304                              |
| 27.6266597                         | 346.7826476                            | 0.054843334                                       | 6.503790221                        | 263.8050089                              |
| 77.40487589                        | 3439.877058                            | 0.035787744                                       | 6.711524489                        | 288.3260154                              |
| 34.16548276                        | 2094.962142                            | 0.103142801                                       | 6.752156873                        | 975.3166835                              |
| 60.19441753                        | 889.3538682                            | 0.038837941                                       | 6.589267422                        | 208.7851003                              |
| 84.45820455                        | 1643.59048                             | 0.036484705                                       | 7.104417362                        | 608.5154374                              |
| 51.936928                          | 471.4123711                            | 0.039867267                                       | 6.416173288                        | 183.2714777                              |
| 32.35163068                        | 800.2806141                            | 0.061458262                                       | 6.849578392                        | 551.4227062                              |
| 41.18256441                        | 819.8638974                            | 0.059080015                                       | 6.850501726                        | 1107.578101                              |
| 117.5128444                        | 1631.763372                            | 0.03194159                                        | 7.03040346                         | 539.5581395                              |
| 41.73200546                        | 876.8806298                            | 0.052357214                                       | 6.757481307                        | 657.8202124                              |
| 119.8279053                        | 2409.480249                            | 0.029343753                                       | 6.640877812                        | 181.952183                               |
| 39.33231697                        | 530.7425249                            | 0.051493637                                       | 6.613330975                        | 300.2724252                              |
| 57.479634                          | 799.8458213                            | 0.040698785                                       | 6.632188807                        | 202.0115274                              |
| 28.10057349                        | 541.5427005                            | 0.061873166                                       | 6.653475019                        | 727.6497403                              |
| 38.18197517                        | 720.2191207                            | 0.049736327                                       | 6.62625943                         | 359.4256804                              |
| 68.00787551                        | 722.7008499                            | 0.037382324                                       | 6.728983395                        | 540.9660057                              |
| 29.76295018                        | 427.1864673                            | 0.082255557                                       | 6.830628302                        | 383.0810386                              |
| 44.94918178                        | 761.5681032                            | 0.044953607                                       | 6.730994195                        | 864.4759358                              |
| 23.09224337                        | 484.2986509                            | 0.074850604                                       | 6.811571892                        | 982.4097808                              |
| 51.53887323                        | 642.2464338                            | 0.041067831                                       | 6.788483231                        | 559.8548942                              |
| 100.7669194                        | 1153.894231                            | 0.049001479                                       | 5.700063756                        | 33.23076923                              |
| 54.73191864                        | 378.8403614                            | 0.039029612                                       | 6.278902706                        | 106.0180723                              |
| 41.12296123                        | 727.0183168                            | 0.051318498                                       | 6.683547035                        | 491.0891089                              |
| 52.43249409                        | 770.2072917                            | 0.041646653                                       | 6.843022575                        | 761.0590278                              |
| 35.5452904                         | 1160.533691                            | 0.05632058                                        | 6.669015437                        | 793.0113298                              |
| 23.73315644                        | 375.239521                             | 0.062500627                                       | 6.283066123                        | 201.2778443                              |
| 50.07825147                        | 731.392755                             | 0.044666444                                       | 6.640318676                        | 295.7302193                              |
| 48.63246108                        | 982.8595658                            | 0.046989059                                       | 6.621349145                        | 395.1275441                              |
| 37.57718763                        | 480.4742917                            | 0.046937434                                       | 6.511769724                        | 259.4868835                              |
| 64.11192643                        | 599.5749086                            | 0.03783301                                        | 6.753615401                        | 500.1084044                              |
| 43.74798239                        | 560.4341463                            | 0.045305413                                       | 6.566742084                        | 278.849512                               |
| 103.863448                         | 1529.911076                            | 0.028907103                                       | 6.928824809                        | 666.3471778                              |
| 24.67071187                        | 357.241921                             | 0.071651722                                       | 6.470702776                        | 451.4236984                              |
| 107.5836015                        | 4124.189639                            | 0.036004879                                       | 7.089749889                        | 1284.088608                              |
| 52.85224882                        | 500.8679245                            | 0.041410578                                       | 6.427368998                        | 178.3241852                              |
| 44.99069949                        | 390.0074627                            | 0.048785921                                       | 5.48743952                         | 47.07462687                              |
| 39.32068062                        | 656.6981891                            | 0.047905137                                       | 6.252064255                        | 145.1207243                              |
| 33.42158422                        | 627.9751752                            | 0.051967045                                       | 6.78891611                         | 787.1559579                              |
| 58.82987562                        | 651.7847642                            | 0.036461387                                       | 6.715112076                        | 228.0979444                              |
| 53.1820849                         | 818.2886679                            | 0.043456933                                       | 6.902072072                        | 991.8987176                              |
| 30.08206                           | 297.4128596                            | 0.052476373                                       | 6.273106508                        | 150.7123519                              |
| 30.10388876                        | 611.2738004                            | 0.105384128                                       | 6.707047846                        | 922.7675916                              |
| 56.82595669                        | 940.5858931                            | 0.040516877                                       | 6.528824195                        | 275.3094425                              |
| 118.2610686                        | 1594.425445                            | 0.027263092                                       | 7.070339406                        | 752.2603739                              |
| 47.03999943                        | 792.6720804                            | 0.046167447                                       | 6.617363862                        | 347.6372776                              |
| 36.79445092                        | 694.3955774                            | 0.058965041                                       | 6.60521525                         | 176.0540541                              |
| 90.16129128                        | 2472.842225                            | 0.055683035                                       | 6.695246833                        | 205.6696935                              |
| 55.11423755                        | 788.1717791                            | 0.041213444                                       | 6.771681977                        | 597.1444077                              |
| 69.21845529                        | 1864.422052                            | 0.037420951                                       | 6.907183844                        | 1642.526104                              |
| 30.97206104                        | 1125.061489                            | 0.06853154                                        | 6.656220663                        | 641.1365696                              |
| 19.68975275                        | 1465.889052                            | 0.094899                                          | 6.814390863                        | 349.0402783                              |
| 42.50419419                        | 280.8294931                            | 0.043895602                                       | 6.013949203                        | 67.44239631                              |
| 101.9091586                        | 2006.925306                            | 0.033915206                                       | 6.881245055                        | 519.1841597                              |
| 83.04875802                        | 834.2817259                            | 0.031745214                                       | 6.427406192                        | 145.6954315                              |
| 44.84975035                        | 629.2126994                            | 0.047437243                                       | 6.858864542                        | 779.8476697                              |
| 44.29783929                        | 473.4192825                            | 0.044340325                                       | 6.154320865                        | 140.2466368                              |
| 64.89392973                        | 1160.69816                             | 0.039320535                                       | 6.72870945                         | 627.9766285                              |
| 51.91471942                        | 630.9661184                            | 0.048194252                                       | 6.973711205                        | 703.6973684                              |
| 38.57572446                        | 449.8857396                            | 0.04711052                                        | 6.670258725                        | 282.2010629                              |
| 50.84249705                        | 1668.974071                            | 0.068456293                                       | 6.943291892                        | 962.756192                               |
| 29.8047383                         | 764.4600953                            | 0.075467819                                       | 6.857175889                        | 1153.607207                              |
| 31.4608811                         | 1020.227669                            | 0.060960386                                       | 6.713548984                        | 1990.666013                              |
| 38.5731459                         | 485.5394265                            | 0.049116147                                       | 6.541535694                        | 292.7150538                              |
| 41.10816878                        | 665.4816473                            | 0.046985266                                       | 6.474651504                        | 316.4341987                              |
| 100.3652889                        | 1449.301639                            | 0.03011556                                        | 6.82239394                         | 200.347541                               |
| 69.61150447                        | 710.0113379                            | 0.035039413                                       | 6.753133504                        | 568.3854875                              |
| 57.33359602                        | 887.6278988                            | 0.039910288                                       | 6.858517793                        | 817.2354181                              |
| 43.8518361                         | 821.4206349                            | 0.048603238                                       | 6.453159374                        | 134.3333333                              |
| 61.33486257                        | 934.4690529                            | 0.038110284                                       | 6.599583283                        | 449.541387                               |
| 79.24987634                        | 1584.923352                            | 0.034177675                                       | 6.776375944                        | 982.4383954                              |
| 53.48318668                        | 386.4827586                            | 0.047705113                                       | 5.665846636                        | 55.96551724                              |
| 58.63207107                        | 826.8911825                            | 0.04528745                                        | 6.847830762                        | 882.7994692                              |
| 55.28114297                        | 1062.949416                            | 0.041537387                                       | 6.979369274                        | 1405.542367                              |
| 63.01039677                        | 1386.829049                            | 0.03949551                                        | 6.649041665                        | 222.5115681                              |
| 70.64796339                        | 980.1056701                            | 0.034957388                                       | 6.746205674                        | 506.0657216                              |
| 17.68240318                        | 351.3934426                            | 0.085012989                                       | 5.787878341                        | 35.55737705                              |
| 96.41360544                        | 1301.495238                            | 0.0430839                                         | 5.508253227                        | 42.18095238                              |
| 33.76467614                        | 1242.826918                            | 0.061707369                                       | 6.87795097                         | 770.6110692                              |
| 97.69768636                        | 836.9830028                            | 0.030282724                                       | 6.756144523                        | 234.8895184                              |
| 58.83771221                        | 1055.654599                            | 0.038453437                                       | 6.681472942                        | 322.0665362                              |
| 68.67734584                        | 1312.213936                            | 0.040945116                                       | 7.150567058                        | 992.6440098                              |
| 26.07190573                        | 876.2473303                            | 0.065447043                                       | 6.693284092                        | 1140.028247                              |
| 259.896827                         | 1797.280632                            | 0.020950179                                       | 6.43952385                         | 121.0632411                              |
| 104.3843429                        | 1495.073191                            | 0.031059286                                       | 7.034237787                        | 365.3815789                              |
| 61.90653711                        | 414.9186992                            | 0.040782603                                       | 5.526960571                        | 49.11382114                              |
| 86.50395082                        | 2022.736148                            | 0.040371482                                       | 6.417621085                        | 119.5488127                              |
| 80.05004537                        | 1380.872367                            | 0.041325207                                       | 6.756280346                        | 220.6208178                              |

| wavelet.LHL_gldm_GrayLevelNonUniformity | wavelet.LHL_gldm_SmallDependenceEmphasis | wavelet.LHL_gldm_DependenceNonUniformityNormalized | wavelet.LHL_gldm_DependenceVariance |
|-----------------------------------------|------------------------------------------|----------------------------------------------------|-------------------------------------|
| 27.03399433                             | 0.51371325                               | 0.297137446                                        | 1.511696587                         |
| 127.0828117                             | 0.360492435                              | 0.18814241                                         | 5.196655763                         |
| 18.5483871                              | 0.553428059                              | 0.33904946                                         | 0.907749156                         |
| 89.67020873                             | 0.547965909                              | 0.317991855                                        | 1.70282196                          |
| 18.17548747                             | 0.481693748                              | 0.29486891                                         | 1.196452541                         |
| 29.10264386                             | 0.497460459                              | 0.292323842                                        | 1.343469207                         |
| 15.70623145                             | 0.532251072                              | 0.333709023                                        | 1.068689519                         |
| 29.17165669                             | 0.569911011                              | 0.368580205                                        | 0.741100633                         |
| 76.86820587                             | 0.523941244                              | 0.312658873                                        | 1.25738847                          |
| 137.0477728                             | 0.462284643                              | 0.270161178                                        | 1.502940109                         |
| 35.27569528                             | 0.474201085                              | 0.280784994                                        | 1.281285046                         |
| 50.34008097                             | 0.48233278                               | 0.285191074                                        | 1.496389422                         |
| 69.03857281                             | 0.483808182                              | 0.285366697                                        | 1.335938641                         |
| 61.31484794                             | 0.401235971                              | 0.235961546                                        | 1.818187346                         |
| 32.60263447                             | 0.54184227                               | 0.31649398                                         | 1.376853942                         |
| 716.5330358                             | 0.312123414                              | 0.140393937                                        | 9.021392368                         |
| 27.10888252                             | 0.52562095                               | 0.299119055                                        | 1.61493748                          |
| 85.08233276                             | 0.460977245                              | 0.26094144                                         | 1.92249455                          |
| 23.20274914                             | 0.508428312                              | 0.314899446                                        | 0.98425857                          |
| 172.1445912                             | 0.382676743                              | 0.196866371                                        | 6.328340684                         |
| 308.6339969                             | 0.422963711                              | 0.212017248                                        | 5.339036582                         |
| 54.93953488                             | 0.527617157                              | 0.313696593                                        | 1.190561114                         |
| 142.9875503                             | 0.4505764                                | 0.240871553                                        | 3.321384685                         |
| 14.11434511                             | 0.617235776                              | 0.378278967                                        | 0.882335398                         |
| 61.99833887                             | 0.453740462                              | 0.249395702                                        | 2.488970872                         |
| 28.24495677                             | 0.506938016                              | 0.291082892                                        | 1.415135081                         |
| 214.4523947                             | 0.380916795                              | 0.209939337                                        | 3.318770854                         |
| 71.27215632                             | 0.451801731                              | 0.250820433                                        | 2.069007431                         |
| 65.901983                               | 0.513463951                              | 0.30649632                                         | 1.331810704                         |
| 209.0936271                             | 0.319181147                              | 0.150700645                                        | 11.06734446                         |
| 142.9075181                             | 0.460074255                              | 0.271933292                                        | 1.541758044                         |
| 443.8640809                             | 0.313541229                              | 0.165667754                                        | 5.088160182                         |
| 83.49090015                             | 0.482977261                              | 0.275383617                                        | 1.535142844                         |
| 5.096153846                             | 0.528782051                              | 0.319526627                                        | 1.190828402                         |
| 12.95783133                             | 0.542912483                              | 0.319331543                                        | 1.085135724                         |
| 103.6633663                             | 0.410535127                              | 0.24311342                                         | 1.873263406                         |
| 119.9423611                             | 0.450756484                              | 0.264256607                                        | 1.518192515                         |
| 188.8992248                             | 0.432198214                              | 0.236437487                                        | 3.189842654                         |
| 52.18802395                             | 0.418429101                              | 0.241051311                                        | 1.931256051                         |
| 46.8551001                              | 0.49095749                               | 0.28191632                                         | 1.695600059                         |
| 69.26187246                             | 0.480687816                              | 0.26806482                                         | 1.811756562                         |
| 44.73137461                             | 0.454301395                              | 0.272284243                                        | 1.539055438                         |
| 62.12180268                             | 0.511509619                              | 0.304572719                                        | 1.264163456                         |
| 46.43804878                             | 0.475544403                              | 0.272040928                                        | 1.537307793                         |
| 54.28753994                             | 0.578980585                              | 0.354817454                                        | 0.990284909                         |
| 159.6400359                             | 0.379633489                              | 0.202613868                                        | 3.122304987                         |
| 153.596812                              | 0.527681996                              | 0.301005299                                        | 1.857068692                         |
| 24.14236707                             | 0.520557938                              | 0.305873388                                        | 1.1473687                           |
| 6.537313433                             | 0.570688226                              | 0.351303186                                        | 1.017821341                         |
| 23.80885312                             | 0.498779343                              | 0.291993409                                        | 1.254140537                         |
| 177.9351636                             | 0.411218557                              | 0.229893679                                        | 3.262690792                         |
| 30.15356711                             | 0.464920469                              | 0.275813718                                        | 1.396466592                         |
| 166.0489401                             | 0.452442865                              | 0.259591394                                        | 2.101458893                         |
| 31.01353638                             | 0.440631698                              | 0.25501244                                         | 1.510445744                         |
| 687.4206653                             | 0.296204685                              | 0.141463681                                        | 8.149993294                         |
| 35.61433447                             | 0.515006636                              | 0.313207557                                        | 1.179375674                         |
| 59.7879617                              | 0.559539943                              | 0.343027986                                        | 0.975536929                         |
| 59.69450889                             | 0.444415315                              | 0.268861004                                        | 1.449078236                         |
| 47.997543                               | 0.414397523                              | 0.216282622                                        | 5.961521048                         |
| 49.05675369                             | 0.444738577                              | 0.233450276                                        | 3.052433709                         |
| 87.33128834                             | 0.484676373                              | 0.281804817                                        | 1.590487735                         |
| 204.9919679                             | 0.513945055                              | 0.299840472                                        | 1.347976659                         |
| 211.7624595                             | 0.402797882                              | 0.207487563                                        | 4.720719724                         |
| 259.1691688                             | 0.262818758                              | 0.127806766                                        | 10.08280103                         |
| 9.525345622                             | 0.522802099                              | 0.310794453                                        | 1.127991675                         |
| 52.67031552                             | 0.557505731                              | 0.33431047                                         | 1.338869703                         |
| 12.50761421                             | 0.601175268                              | 0.369785359                                        | 0.811152052                         |
| 151.6568658                             | 0.429659588                              | 0.243931082                                        | 2.666342361                         |
| 19.77578475                             | 0.513905082                              | 0.314454343                                        | 0.938808341                         |
| 79.07359523                             | 0.531174979                              | 0.312270825                                        | 1.295993864                         |
| 146.5105263                             | 0.433204353                              | 0.231479398                                        | 3.429499654                         |
| 53.18777679                             | 0.433231701                              | 0.249956654                                        | 1.977681599                         |
| 353.7821207                             | 0.381687712                              | 0.186291833                                        | 6.055495715                         |
| 506.8418702                             | 0.341052153                              | 0.171769983                                        | 6.686916756                         |
| 559.6163399                             | 0.401345576                              | 0.21684815                                         | 3.078578325                         |
| 54.81362007                             | 0.440641197                              | 0.262289475                                        | 1.771675595                         |
| 52.48254252                             | 0.489230811                              | 0.283289345                                        | 1.442825897                         |
| 18.3704918                              | 0.562321707                              | 0.328438592                                        | 1.342800322                         |
| 61.80952381                             | 0.534840296                              | 0.322213995                                        | 1.239543966                         |
| 113.5846803                             | 0.502127333                              | 0.28715229                                         | 1.762813412                         |
| 24.49603175                             | 0.469679733                              | 0.266534392                                        | 1.642841396                         |
| 51.10589113                             | 0.562156972                              | 0.335228477                                        | 1.079942456                         |
| 95.42406877                             | 0.581251884                              | 0.351876216                                        | 0.938953703                         |
| 6.917241379                             | 0.634963602                              | 0.385969084                                        | 1.079667063                         |
| 153.5697434                             | 0.462121595                              | 0.260336027                                        | 1.962805424                         |
| 227.458729                              | 0.446871079                              | 0.256673186                                        | 1.908623912                         |
| 30.72750643                             | 0.493615162                              | 0.286004586                                        | 1.566378758                         |
| 54.25386598                             | 0.540783085                              | 0.326073274                                        | 1.030356573                         |
| 15.55737705                             | 0.316183692                              | 0.194302607                                        | 2.749798441                         |
| 4.523809524                             | 0.517592593                              | 0.401723356                                        | 0.50521542                          |
| 245.2867925                             | 0.355596348                              | 0.19386442                                         | 4.31326014                          |
| 21.3796034                              | 0.544246329                              | 0.3327047                                          | 0.944089111                         |
| 39.29941292                             | 0.539718307                              | 0.315133597                                        | 1.39890702                          |
| 167.4655257                             | 0.444543046                              | 0.242700247                                        | 3.22637263                          |
| 379.9855322                             | 0.351819562                              | 0.19635347                                         | 3.263100201                         |
| 5.300395257                             | 0.70079271                               | 0.478510834                                        | 0.550297614                         |
| 37.76809211                             | 0.518959029                              | 0.300478272                                        | 1.710688625                         |
| 5.016260163                             | 0.59733514                               | 0.399299359                                        | 0.596205962                         |
| 15.30079156                             | 0.511553408                              | 0.315432223                                        | 1.067035178                         |
| 33.34944238                             | 0.493711812                              | 0.273383913                                        | 2.476803803                         |

| wavelet.LHL_gldm_LargeDependenceEmphasis | wavelet.LHL_gldm_LargeDependenceLowGrayLevelEmphasis | wavelet.LHL_gldm_SmallDependenceHighGrayLevelEmphasis | wavelet.LHL_gldm_LargeDependenceHighGrayLevelEmphasis |
|------------------------------------------|------------------------------------------------------|-------------------------------------------------------|-------------------------------------------------------|
| 5.764872521                              | 0.009092997                                          | 526.5098679                                           | 5741.060907                                           |
| 14.62927299                              | 0.036254966                                          | 190.6774203                                           | 6709.446798                                           |
| 4.322580645                              | 0.017719939                                          | 358.0948515                                           | 2382.073733                                           |
| 5.722580645                              | 0.004472467                                          | 966.8681438                                           | 9174.962808                                           |
| 5.456824513                              | 0.013226597                                          | 298.4089748                                           | 3590.133705                                           |
| 5.628304821                              | 0.025913598                                          | 214.2971974                                           | 1930.342146                                           |
| 4.709198813                              | 0.008629216                                          | 502.0181166                                           | 4585.709199                                           |
| 3.826347305                              | 0.004193747                                          | 834.9505755                                           | 5890.783433                                           |
| 5.175084175                              | 0.007040659                                          | 1042.828976                                           | 9856.720539                                           |
| 6.306649451                              | 0.006026216                                          | 590.8410707                                           | 7840.782117                                           |
| 5.764207981                              | 0.011532099                                          | 347.7817612                                           | 4068.385732                                           |
| 6.002699055                              | 0.00642226                                           | 676.7502019                                           | 7521.976383                                           |
| 5.7512054                                | 0.002874317                                          | 1478.578403                                           | 15274.30183                                           |
| 7.745974955                              | 0.031492352                                          | 141.3524879                                           | 2641.414132                                           |
| 5.267837541                              | 0.002790099                                          | 1922.524487                                           | 17243.47969                                           |
| 24.32776738                              | 0.013211973                                          | 676.2064683                                           | 50139.99223                                           |
| 5.871060172                              | 0.010283975                                          | 453.6084451                                           | 5228.517192                                           |
| 7.0948542                                | 0.005577596                                          | 807.3170846                                           | 10956.46012                                           |
| 4.807560137                              | 0.022750848                                          | 241.7062772                                           | 2254.659794                                           |
| 15.69617994                              | 0.021960955                                          | 318.1001756                                           | 11959.41307                                           |
| 13.54862175                              | 0.01875845                                           | 362.4498156                                           | 10713.40716                                           |
| 5.047674419                              | 0.00478459                                           | 887.7291755                                           | 7788.14593                                            |
| 9.592456975                              | 0.01260276                                           | 406.5950796                                           | 8167.265837                                           |
| 3.881496881                              | 0.003995631                                          | 1510.07912                                            | 9139.808732                                           |
| 8.171096346                              | 0.026115053                                          | 256.8953738                                           | 4024.149502                                           |
| 5.720461095                              | 0.011090831                                          | 424.0235505                                           | 4433.364553                                           |
| 10.79976919                              | 0.023425142                                          | 214.8772438                                           | 5627.353433                                           |
| 7.517794836                              | 0.012991241                                          | 335.2037139                                           | 5303.184927                                           |
| 5.388668555                              | 0.012075154                                          | 405.4290328                                           | 3373.603966                                           |
| 26.35169158                              | 0.068963398                                          | 145.0554786                                           | 10853.40755                                           |
| 6.355772255                              | 0.011412174                                          | 358.1271052                                           | 4672.726958                                           |
| 16.03946037                              | 0.038561623                                          | 168.746014                                            | 7250.465261                                           |
| 6.187407772                              | 0.013711066                                          | 323.263771                                            | 3834.030005                                           |
| 5.038461538                              | 0.084645911                                          | 689.5740946                                           | 5323.490385                                           |
| 4.801204819                              | 0.038942615                                          | 208.8668081                                           | 1835.725904                                           |
| 7.623762376                              | 0.013188827                                          | 307.6594733                                           | 5330.84505                                            |
| 6.475                                    | 0.011434708                                          | 360.9366989                                           | 4840.028125                                           |
| 9.55515802                               | 0.009206281                                          | 504.155819                                            | 10785.72153                                           |
| 7.697005988                              | 0.027008296                                          | 155.5316057                                           | 2848.161677                                           |
| 6.300285987                              | 0.011945353                                          | 367.2689711                                           | 4376.256435                                           |
| 6.727272727                              | 0.009205395                                          | 479.8734221                                           | 6389.984396                                           |
| 6.380902413                              | 0.018295795                                          | 211.2932332                                           | 3220.604407                                           |
| 5.313032887                              | 0.021954725                                          | 313.9563504                                           | 3028.032887                                           |
| 6.266341463                              | 0.016356052                                          | 277.0787997                                           | 3328.549268                                           |
| 4.264110756                              | 0.004135603                                          | 865.4042144                                           | 6898.048456                                           |
| 10.78635548                              | 0.037717656                                          | 144.8047863                                           | 3597.868492                                           |
| 6.209563994                              | 0.002024809                                          | 2212.280366                                           | 25017.43483                                           |
| 5.0948542                                | 0.017565355                                          | 278.0849886                                           | 2316.58319                                            |
| 4.388059701                              | 0.040216964                                          | 217.2871061                                           | 1848.977612                                           |
| 5.490945674                              | 0.012430242                                          | 326.9817796                                           | 3605.273642                                           |
| 9.886098131                              | 0.018755314                                          | 265.6543843                                           | 5945.770736                                           |
| 6.044740024                              | 0.01581797                                           | 300.9082112                                           | 3938.681983                                           |
| 7.426066475                              | 0.011545556                                          | 377.4575927                                           | 5808.556137                                           |
| 6.736040609                              | 0.037871432                                          | 138.6342973                                           | 1910.282572                                           |
| 23.1162042                               | 0.043953415                                          | 190.3213878                                           | 12959.06132                                           |
| 5.102389078                              | 0.008587056                                          | 498.461637                                            | 4638.460751                                           |
| 4.374373005                              | 0.004393028                                          | 889.2789397                                           | 6890.216598                                           |
| 6.351894818                              | 0.010644075                                          | 352.2907686                                           | 5061.304718                                           |
| 14.26781327                              | 0.023129973                                          | 281.2403121                                           | 9932.766585                                           |
| 9.476730988                              | 0.005702344                                          | 1138.766461                                           | 22378.26107                                           |
| 6.178857952                              | 0.010680004                                          | 396.9091581                                           | 4655.647003                                           |
| 5.479006937                              | 0.003532923                                          | 981.5718926                                           | 9897.419861                                           |
| 12.78705502                              | 0.012647498                                          | 462.5269361                                           | 13718.56505                                           |
| 27.97839619                              | 0.020161808                                          | 381.5958664                                           | 40026.58989                                           |
| 5                                        | 0.051823644                                          | 142.9459242                                           | 1336.654378                                           |
| 4.99871217                               | 0.008236244                                          | 1135.65748                                            | 9733.01159                                            |
| 3.842639594                              | 0.010683883                                          | 525.4482995                                           | 2966.337563                                           |
| 8.602126994                              | 0.017590206                                          | 280.1673485                                           | 5179.128245                                           |
| 4.726457399                              | 0.018658014                                          | 245.6971518                                           | 2241.221973                                           |
| 5.218796619                              | 0.005870535                                          | 631.2612207                                           | 5886.195922                                           |
| 10.07368421                              | 0.023302929                                          | 282.6041326                                           | 5937.972697                                           |
| 7.49955713                               | 0.025275856                                          | 205.0221519                                           | 3169.434012                                           |
| 15.90595975                              | 0.010261003                                          | 650.4140752                                           | 26038.8185                                            |
| 17.75967838                              | 0.024867724                                          | 270.1244672                                           | 13389.58189                                           |
| 10.09934641                              | 0.01074793                                           | 419.5980302                                           | 10104.91983                                           |
| 6.935483871                              | 0.019930144                                          | 219.9594258                                           | 3268.03405                                            |
| 5.925693823                              | 0.013204125                                          | 334.943991                                            | 3789.957923                                           |
| 5.072131148                              | 0.008010909                                          | 833.5079525                                           | 6824.137705                                           |
| 5.020408163                              | 0.011943145                                          | 407.216492                                            | 3273.750567                                           |
| 6.281799016                              | 0.009183757                                          | 462.1420696                                           | 5395.865425                                           |
| 6.563492063                              | 0.011803056                                          | 411.8380622                                           | 5018.603175                                           |
| 4.597315436                              | 0.007546854                                          | 535.2660844                                           | 4213.703952                                           |
| 4.202722063                              | 0.003532204                                          | 923.3289538                                           | 6640.590974                                           |
| 4.172413793                              | 0.03355821                                           | 239.5318027                                           | 1609.227586                                           |
| 7.149808316                              | 0.011643201                                          | 401.9583624                                           | 5498.567974                                           |
| 7.206355004                              | 0.008296797                                          | 495.9904922                                           | 7342.384405                                           |
| 6.064267352                              | 0.006302528                                          | 704.9144431                                           | 8160.281491                                           |
| 4.648195876                              | 0.007084106                                          | 525.4142158                                           | 4569.890464                                           |
| 11.36065574                              | 0.079718864                                          | 118.6401021                                           | 3931.087432                                           |
| 3.60952381                               | 0.013243725                                          | 648.8351852                                           | 4899.971429                                           |
| 13.10616352                              | 0.011485007                                          | 440.5657406                                           | 15917.34667                                           |
| 4.450424929                              | 0.01093871                                           | 488.8116687                                           | 3497.334278                                           |
| 5.328767123                              | 0.007011939                                          | 583.0281865                                           | 5501.860078                                           |
| 9.414180929                              | 0.008731131                                          | 616.8384023                                           | 11607.80954                                           |
| 11.40613159                              | 0.014378235                                          | 316.8507968                                           | 9704.316914                                           |
| 2.770750988                              | 0.007136714                                          | 1286.464561                                           | 4614.806324                                           |
| 5.991776316                              | 0.006360053                                          | 790.5020842                                           | 8754.699836                                           |
| 3.37398374                               | 0.107402538                                          | 255.3796296                                           | 1282.934959                                           |
| 4.910290237                              | 0.005682011                                          | 1056.637253                                           | 9613.92876                                            |
| 7.602230483                              | 0.010333201                                          | 699.1559795                                           | 10218.92193                                           |

| wavelet.LHL_gldm_SmallDependenceLowGrayLevelEmphasis | wavelet.LHL_gldm_LowGrayLevelEmphasis | wavelet.LHL_gldzm_DistanceZoneVariabilityNormalized | wavelet.LHL_gldzm_LowIntensityEmphasis |
|------------------------------------------------------|---------------------------------------|-----------------------------------------------------|----------------------------------------|
| 0.002642789                                          | 0.003330933                           | 0.935407066                                         | 0.004690173                            |
| 0.001845152                                          | 0.003524126                           | 0.934832342                                         | 0.004839824                            |
| 0.004175154                                          | 0.006257366                           | 0.911454082                                         | 0.007360713                            |
| 0.000910323                                          | 0.001230333                           | 0.875204405                                         | 0.001547076                            |
| 0.004500509                                          | 0.005455683                           | 0.899367547                                         | 0.008139218                            |
| 0.004835623                                          | 0.007063639                           | 0.874310707                                         | 0.009101441                            |
| 0.003901939                                          | 0.004439149                           | 0.769816491                                         | 0.006409884                            |
| 0.00160577                                           | 0.00196031                            | 0.844914756                                         | 0.002552525                            |
| 0.00073868                                           | 0.001744912                           | 0.932597632                                         | 0.001700154                            |
| 0.000862863                                          | 0.001353027                           | 0.939382618                                         | 0.001743769                            |
| 0.002332204                                          | 0.003254872                           | 0.855727788                                         | 0.004451689                            |
| 0.001171774                                          | 0.001659192                           | 0.877486252                                         | 0.002207907                            |
| 0.000695596                                          | 0.000905953                           | 0.915130892                                         | 0.001288899                            |
| 0.003544654                                          | 0.00603023                            | 0.900980174                                         | 0.008198212                            |
| 0.001271043                                          | 0.001417657                           | 0.860729172                                         | 0.002071195                            |
| 0.000391664                                          | 0.000950913                           | 0.921385805                                         | 0.001397158                            |
| 0.003000317                                          | 0.003678336                           | 0.758572777                                         | 0.00524826                             |
| 0.000837483                                          | 0.00123376                            | 0.951516679                                         | 0.001673064                            |
| 0.004794769                                          | 0.007145316                           | 0.838962346                                         | 0.008851275                            |
| 0.001070782                                          | 0.001944608                           | 0.937759122                                         | 0.002619289                            |
| 0.001023024                                          | 0.001917789                           | 0.889357517                                         | 0.002389725                            |
| 0.001312834                                          | 0.001682114                           | 0.856257861                                         | 0.00225749                             |
| 0.001109417                                          | 0.001842247                           | 0.920792039                                         | 0.002340526                            |
| 0.002472005                                          | 0.002654573                           | 0.741242067                                         | 0.003614829                            |
| 0.001799396                                          | 0.004376719                           | 0.885963927                                         | 0.004600245                            |
| 0.003008514                                          | 0.003816941                           | 0.910574608                                         | 0.005391241                            |
| 0.001428133                                          | 0.00284297                            | 0.88417821                                          | 0.003624973                            |
| 0.00186363                                           | 0.002779031                           | 0.955345271                                         | 0.003832385                            |
| 0.001913338                                          | 0.00292554                            | 0.950262828                                         | 0.003493861                            |
| 0.002547069                                          | 0.004587614                           | 0.949507625                                         | 0.007513524                            |
| 0.001552429                                          | 0.002514365                           | 0.951469934                                         | 0.003163317                            |
| 0.001227506                                          | 0.002947573                           | 0.949847374                                         | 0.003790766                            |
| 0.002191552                                          | 0.003325924                           | 0.939817137                                         | 0.004287976                            |
| 0.005552855                                          | 0.0020962016                          | 0.807810651                                         | 0.017011487                            |
| 0.009863204                                          | 0.014089242                           | 0.828395589                                         | 0.017292523                            |
| 0.001468646                                          | 0.002477954                           | 0.886687903                                         | 0.003360331                            |
| 0.001389036                                          | 0.002366923                           | 0.947474192                                         | 0.00292666                             |
| 0.000783348                                          | 0.001317963                           | 0.916631979                                         | 0.001712107                            |
| 0.004153185                                          | 0.006023463                           | 0.836934729                                         | 0.009100703                            |
| 0.002121725                                          | 0.003005939                           | 0.941134484                                         | 0.003989213                            |
| 0.002089855                                          | 0.002686288                           | 0.840414109                                         | 0.003942262                            |
| 0.003030973                                          | 0.004597075                           | 0.896415838                                         | 0.006163913                            |
| 0.004151334                                          | 0.006641218                           | 0.901619495                                         | 0.008039944                            |
| 0.002442682                                          | 0.003742528                           | 0.821978357                                         | 0.004792913                            |
| 0.001257142                                          | 0.001618691                           | 0.870620827                                         | 0.002021937                            |
| 0.003099944                                          | 0.005347213                           | 0.959159752                                         | 0.007758698                            |
| 0.000568352                                          | 0.000690725                           | 0.834535686                                         | 0.000981799                            |
| 0.00386196                                           | 0.005365874                           | 0.917053694                                         | 0.006943602                            |
| 0.010556754                                          | 0.013491707                           | 0.798553719                                         | 0.01680142                             |
| 0.003192405                                          | 0.004115893                           | 0.834710744                                         | 0.005819833                            |
| 0.001278339                                          | 0.002429319                           | 0.943310778                                         | 0.002975642                            |
| 0.002592731                                          | 0.003927317                           | 0.944012075                                         | 0.005137915                            |
| 0.001338404                                          | 0.002186711                           | 0.919948983                                         | 0.002790794                            |
| 0.00707828                                           | 0.0009967645                          | 0.936171835                                         | 0.014620774                            |
| 0.001083789                                          | 0.002497348                           | 0.952135259                                         | 0.003515463                            |
| 0.002115404                                          | 0.002843943                           | 0.842020465                                         | 0.003720738                            |
| 0.001219612                                          | 0.001610184                           | 0.718487461                                         | 0.002011174                            |
| 0.001852653                                          | 0.002704456                           | 0.768320714                                         | 0.00375086                             |
| 0.002481784                                          | 0.003411338                           | 0.847583066                                         | 0.00545536                             |
| 0.001597371                                          | 0.001877127                           | 0.977631498                                         | 0.003259216                            |
| 0.001725803                                          | 0.002593761                           | 0.924614201                                         | 0.003322                               |
| 0.000545368                                          | 0.000841297                           | 0.929072709                                         | 0.001004722                            |
| 0.000793213                                          | 0.001363853                           | 0.956096276                                         | 0.001840002                            |
| 0.000568234                                          | 0.001087682                           | 0.944220785                                         | 0.002014403                            |
| 0.014092456                                          | 0.017750979                           | 0.872933884                                         | 0.024299793                            |
| 0.000879868                                          | 0.002106615                           | 0.902649296                                         | 0.001957464                            |
| 0.003917561                                          | 0.0047739                             | 0.789708176                                         | 0.006011402                            |
| 0.001654694                                          | 0.002865524                           | 0.965400103                                         | 0.003649451                            |
| 0.005133281                                          | 0.006681279                           | 0.901673525                                         | 0.008955359                            |
| 0.0012094                                            | 0.001693296                           | 0.925055482                                         | 0.002118571                            |
| 0.002978205                                          | 0.004416644                           | 0.868642123                                         | 0.0064256                              |
| 0.003889179                                          | 0.005659137                           | 0.939146405                                         | 0.008148543                            |
| 0.000499276                                          | 0.000906307                           | 0.941026814                                         | 0.001241615                            |
| 0.000812623                                          | 0.001804423                           | 0.95757963                                          | 0.002323695                            |
| 0.000609005                                          | 0.001256445                           | 0.950529225                                         | 0.001472542                            |
| 0.003110734                                          | 0.004659384                           | 0.827926243                                         | 0.006380756                            |
| 0.003165732                                          | 0.00411215                            | 0.873182383                                         | 0.005850152                            |
| 0.003903662                                          | 0.00430775                            | 0.894308154                                         | 0.006179108                            |
| 0.0023987                                            | 0.003420496                           | 0.858588867                                         | 0.004219367                            |
| 0.001224143                                          | 0.001956963                           | 0.895780349                                         | 0.002325702                            |
| 0.002823872                                          | 0.003620505                           | 0.870493365                                         | 0.005421499                            |
| 0.002237327                                          | 0.002847742                           | 0.825424425                                         | 0.003675393                            |
| 0.000956354                                          | 0.001261244                           | 0.907388584                                         | 0.00153647                             |
| 0.020282397                                          | 0.02180286                            | 0.824677161                                         | 0.029020909                            |
| 0.001390997                                          | 0.002279769                           | 0.968469216                                         | 0.002863633                            |
| 0.000812366                                          | 0.001448043                           | 0.82                                                | 0.001713036                            |
| 0.001804817                                          | 0.002225155                           | 0.943526067                                         | 0.003263712                            |
| 0.001737922                                          | 0.002359852                           | 0.809422222                                         | 0.002972434                            |
| 0.003865712                                          | 0.01437273                            | 0.917959184                                         | 0.017929074                            |
| 0.010316796                                          | 0.010807393                           | 0.915657439                                         | 0.016148257                            |
| 0.000622716                                          | 0.00118104                            | 0.917018221                                         | 0.001637389                            |
| 0.003143221                                          | 0.00410127                            | 0.926672565                                         | 0.005287058                            |
| 0.001730552                                          | 0.002267621                           | 0.86988204                                          | 0.002969499                            |
| 0.000785436                                          | 0.001302665                           | 0.936840975                                         | 0.001665609                            |
| 0.000723349                                          | 0.001538768                           | 0.941622202                                         | 0.001966424                            |
| 0.00513728                                           | 0.005446682                           | 0.689827569                                         | 0.006674023                            |
| 0.001899666                                          | 0.002338334                           | 0.935899393                                         | 0.003322938                            |
| 0.007343621                                          | 0.023390194                           | 0.812601406                                         | 0.017463009                            |
| 0.003240742                                          | 0.003512507                           | 0.837372449                                         | 0.005557852                            |
| 0.003589762                                          | 0.004220849                           | 0.884969523                                         | 0.006574955                            |

| wavelet.LHL_gldzm_LargeDistanceEmphasis | wavelet.LHL_gldzm_HighIntensitySmallDistanceEmphasis | wavelet.LHL_gldzm_LowIntensityLargeDistanceEmphasis | wavelet.LHL_gldzm_HighIntensityEmphasis |
|-----------------------------------------|------------------------------------------------------|-----------------------------------------------------|-----------------------------------------|
| 1.100238663                             | 992.1264916                                          | 0.004899012                                         | 1013.033413                             |
| 1.101162791                             | 515.1569767                                          | 0.005505706                                         | 530.2093023                             |
| 1.139285714                             | 612.8830357                                          | 0.007734449                                         | 631.25                                  |
| 1.200607903                             | 1669.11155                                           | 0.001783717                                         | 1756.240122                             |
| 1.15942029                              | 610.4154589                                          | 0.009549815                                         | 624.3285024                             |
| 1.202156334                             | 402.6219677                                          | 0.019005712                                         | 423.9433962                             |
| 1.398104265                             | 846.1421801                                          | 0.006980373                                         | 948.4407583                             |
| 1.254160363                             | 1380.328669                                          | 0.002832024                                         | 1473.406959                             |
| 1.104761905                             | 1931.040873                                          | 0.001789137                                         | 1983.20873                              |
| 1.093862816                             | 1246.182912                                          | 0.001832519                                         | 1277.034898                             |
| 1.234782609                             | 683.363587                                           | 0.004898567                                         | 738.1673913                             |
| 1.196662694                             | 1335.972884                                          | 0.002453286                                         | 1403.479142                             |
| 1.133219471                             | 2919.230145                                          | 0.001335833                                         | 3035.529462                             |
| 1.156716418                             | 341.9295709                                          | 0.00954217                                          | 352.9402985                             |
| 1.22591944                              | 3337.588004                                          | 0.002147751                                         | 3524.33275                              |
| 1.122961104                             | 2108.376725                                          | 0.00147739                                          | 2164.376412                             |
| 1.421307506                             | 794.4364407                                          | 0.014443906                                         | 870.1210654                             |
| 1.07457899                              | 1687.625702                                          | 0.001714997                                         | 1730.757017                             |
| 1.264957265                             | 441.4786325                                          | 0.01972299                                          | 475.8119658                             |
| 1.096463023                             | 801.4895498                                          | 0.002832417                                         | 829.7315113                             |
| 1.176327523                             | 813.1673085                                          | 0.002683079                                         | 853.7612485                             |
| 1.233840304                             | 1570.86193                                           | 0.00240968                                          | 1678.196768                             |
| 1.123931624                             | 877.8586182                                          | 0.002654398                                         | 900.1972934                             |
| 1.458083832                             | 2134.802395                                          | 0.003830302                                         | 2437.748503                             |
| 1.182108626                             | 530.5910543                                          | 0.005098703                                         | 561.0319489                             |
| 1.140740741                             | 799.545679                                           | 0.005671671                                         | 826.2716049                             |
| 1.185160867                             | 534.3557124                                          | 0.004285543                                         | 562.6769534                             |
| 1.068548387                             | 724.4909274                                          | 0.003968646                                         | 738.4637097                             |
| 1.076559546                             | 765.6517013                                          | 0.003824882                                         | 775.8185255                             |
| 1.07775378                              | 448.1862851                                          | 0.007921667                                         | 455.1274298                             |
| 1.074652778                             | 763.19864                                            | 0.003305303                                         | 777.7893519                             |
| 1.077216397                             | 526.9380362                                          | 0.004138256                                         | 536.7287893                             |
| 1.093167702                             | 649.8349601                                          | 0.005090903                                         | 660.9432121                             |
| 1.323076923                             | 1101.080769                                          | 0.017201802                                         | 1244.169231                             |
| 1.28436019                              | 365.7239336                                          | 0.042154255                                         | 383.2654028                             |
| 1.180873181                             | 700.0974532                                          | 0.003699057                                         | 748.8669439                             |
| 1.080974325                             | 778.6319947                                          | 0.003267732                                         | 795.4825543                             |
| 1.130750605                             | 1132.534504                                          | 0.001848116                                         | 1172.745763                             |
| 1.268656716                             | 350.2307214                                          | 0.010995703                                         | 372.5572139                             |
| 1.091062395                             | 725.0004216                                          | 0.004169203                                         | 748.4249578                             |
| 1.262315271                             | 943.3094212                                          | 0.004494877                                         | 1001.817734                             |
| 1.164383562                             | 452.3762231                                          | 0.007635432                                         | 467.0313112                             |
| 1.155645982                             | 590.3512208                                          | 0.00913346                                          | 614.1169888                             |
| 1.296296296                             | 538.787037                                           | 0.006170623                                         | 580.3597884                             |
| 1.208569119                             | 1425.024454                                          | 0.002475731                                         | 1499.590946                             |
| 1.062565172                             | 377.1551095                                          | 0.008091291                                         | 382.472367                              |
| 1.273048254                             | 3879.174382                                          | 0.001056437                                         | 4184.997254                             |
| 1.130057803                             | 508.732659                                           | 0.007266436                                         | 531.3063584                             |
| 1.340909091                             | 351.6477273                                          | 0.020469829                                         | 385.2272727                             |
| 1.272727273                             | 602.4938811                                          | 0.006665453                                         | 653.1818182                             |
| 1.087591241                             | 626.3955292                                          | 0.003180497                                         | 643.2354015                             |
| 1.086474501                             | 631.1502217                                          | 0.005318213                                         | 649.9135255                             |
| 1.125310791                             | 803.1310293                                          | 0.003444472                                         | 832.7722526                             |
| 1.099009901                             | 307.9339934                                          | 0.015624143                                         | 314.0033003                             |
| 1.073602908                             | 633.1089278                                          | 0.003710465                                         | 649.1281236                             |
| 1.259398496                             | 904.2142857                                          | 0.01005737                                          | 961.3157895                             |
| 1.508438819                             | 1421.804501                                          | 0.003294317                                         | 1596.604079                             |
| 1.401162791                             | 713.8735465                                          | 0.005530799                                         | 790.6046512                             |
| 1.249350649                             | 653.1253247                                          | 0.006318418                                         | 689.1584416                             |
| 1.033936652                             | 2537.930995                                          | 0.00327597                                          | 2556.165158                             |
| 1.11769616                              | 786.6260434                                          | 0.00373274                                          | 812.3038397                             |
| 1.110457921                             | 1851.784421                                          | 0.001091116                                         | 1903.356436                             |
| 1.067368421                             | 1130.518772                                          | 0.001902125                                         | 1154.710877                             |
| 1.086142322                             | 1426.539014                                          | 0.002083847                                         | 1460.601748                             |
| 1.204545455                             | 263.7064394                                          | 0.031929522                                         | 275.780303                              |
| 1.153923541                             | 1966.529678                                          | 0.002099003                                         | 2032.857143                             |
| 1.358208955                             | 798.9654851                                          | 0.007658854                                         | 865.4440299                             |
| 1.052830189                             | 638.0256289                                          | 0.003748916                                         | 649.8138365                             |
| 1.155555556                             | 456.7824074                                          | 0.009532905                                         | 478.162963                              |
| 1.116978067                             | 1143.960804                                          | 0.002256861                                         | 1182.779854                             |
| 1.212021136                             | 609.1917107                                          | 0.009120998                                         | 654.1268164                             |
| 1.094240838                             | 456.3054101                                          | 0.00865759                                          | 472.6614311                             |
| 1.091234347                             | 1656.636628                                          | 0.001312217                                         | 1699.392665                             |
| 1.06504065                              | 777.2080914                                          | 0.002444686                                         | 789.7684863                             |
| 1.07613852                              | 1024.135259                                          | 0.001612253                                         | 1042.938093                             |
| 1.285229202                             | 459.8348896                                          | 0.010380458                                         | 500.6112054                             |
| 1.204113924                             | 644.1095728                                          | 0.006584133                                         | 683.8607595                             |
| 1.167938931                             | 1413.253817                                          | 0.00660131                                          | 1484.076336                             |
| 1.229704797                             | 706.8380996                                          | 0.004940069                                         | 747.9261993                             |
| 1.165454545                             | 875.6401515                                          | 0.002617749                                         | 913.3206061                             |
| 1.208791209                             | 802.9075092                                          | 0.005770102                                         | 868.9047619                             |
| 1.289871944                             | 875.8448778                                          | 0.00499146                                          | 951.2037253                             |
| 1.146024878                             | 1525.329232                                          | 0.003288062                                         | 1587.595457                             |
| 1.291262136                             | 368.868932                                           | 0.068735523                                         | 381.9902913                             |
| 1.048066298                             | 853.1895028                                          | 0.002992741                                         | 866.6762431                             |
| 1.3                                     | 1014.704283                                          | 0.002145924                                         | 1102.38007                              |
| 1.087248322                             | 1387.373602                                          | 0.003356238                                         | 1419.454139                             |
| 1.32                                    | 892.5184615                                          | 0.003692478                                         | 972.2646154                             |
| 1.128571429                             | 362.0928571                                          | 0.018650219                                         | 368.5857143                             |
| 1.132352941                             | 1232.625                                             | 0.016363969                                         | 1271.470588                             |
| 1.130116066                             | 1206.876145                                          | 0.001793558                                         | 1247.311546                             |
| 1.114349776                             | 856.0403587                                          | 0.005478767                                         | 886.3766816                             |
| 1.209856916                             | 1017.66256                                           | 0.003270528                                         | 1071.785374                             |
| 1.09793567                              | 1346.68591                                           | 0.001774333                                         | 1383.25012                              |
| 1.090283749                             | 883.8301806                                          | 0.002107903                                         | 902.9084265                             |
| 1.575757576                             | 1586.910354                                          | 0.007336883                                         | 1835.217172                             |
| 1.099447514                             | 1485.272445                                          | 0.003419297                                         | 1520.941989                             |
| 1.313953488                             | 386.3488372                                          | 0.021390719                                         | 418.0232558                             |
| 1.267857143                             | 1912.552455                                          | 0.00570529                                          | 2066.700893                             |
| 1.18380744                              | 1349.022429                                          | 0.006725096                                         | 1412.463895                             |

| wavelet.LHL_gldzm_DistanceZoneVariability | wavelet.LHL_gldzm_ZonePercentage | wavelet.LHL_gldzm_IntensityVariabilityNormalized | wavelet.LHL_gldzm_LowIntensitySmallDistanceEmphasis | wavelet.LHL_gldzm_IntensityVariability |
|-------------------------------------------|----------------------------------|--------------------------------------------------|-----------------------------------------------------|----------------------------------------|
| 391.9355609                               | 0.593484419                      | 0.03078702                                       | 0.004637964                                         | 12.89976134                            |
| 803.955814                                | 0.414058739                      | 0.039277988                                      | 0.004673354                                         | 33.77906977                            |
| 255.2071429                               | 0.64516129                       | 0.035280612                                      | 0.007267279                                         | 9.878571429                            |
| 1439.711246                               | 0.624288425                      | 0.026494582                                      | 0.001487916                                         | 43.58358663                            |
| 186.1690821                               | 0.576601671                      | 0.043618287                                      | 0.007786569                                         | 9.028985507                            |
| 324.3692722                               | 0.576982893                      | 0.039021803                                      | 0.006625374                                         | 14.47708895                            |
| 162.4312796                               | 0.62611276                       | 0.040857124                                      | 0.006267262                                         | 8.620853081                            |
| 558.4886536                               | 0.659680639                      | 0.027567913                                      | 0.002482306                                         | 18.22239032                            |
| 1175.073016                               | 0.606060606                      | 0.030894432                                      | 0.001677909                                         | 38.92698413                            |
| 1561.253911                               | 0.536475145                      | 0.034805035                                      | 0.001721581                                         | 57.84596871                            |
| 393.6347826                               | 0.556227328                      | 0.038345936                                      | 0.004339969                                         | 17.63913043                            |
| 736.2109654                               | 0.566126856                      | 0.028848408                                      | 0.002146563                                         | 24.20381406                            |
| 1071.618275                               | 0.564660945                      | 0.026818772                                      | 0.001277166                                         | 31.40478224                            |
| 482.9253731                               | 0.479427549                      | 0.046203219                                      | 0.007862223                                         | 24.76492537                            |
| 491.4763573                               | 0.626783754                      | 0.030618849                                      | 0.002052057                                         | 17.48336252                            |
| 2203.033459                               | 0.344177343                      | 0.037786163                                      | 0.0013771                                           | 90.34671685                            |
| 313.2905569                               | 0.591690544                      | 0.033982646                                      | 0.002949348                                         | 14.03631961                            |
| 1186.541299                               | 0.534734134                      | 0.028345174                                      | 0.001662581                                         | 35.34643144                            |
| 294.4757835                               | 0.603092784                      | 0.037507812                                      | 0.006133346                                         | 13.16524217                            |
| 1166.572347                               | 0.444127097                      | 0.039873709                                      | 0.002566007                                         | 49.60289389                            |
| 2194.044994                               | 0.472243492                      | 0.035320713                                      | 0.002316386                                         | 87.13619781                            |
| 900.78327                                 | 0.611627907                      | 0.026292487                                      | 0.002211621                                         | 27.65969582                            |
| 1292.792023                               | 0.5140974                        | 0.03575458                                       | 0.002262059                                         | 50.1994302                             |
| 247.5748503                               | 0.694386694                      | 0.025404281                                      | 0.003560961                                         | 8.48502994                             |
| 554.6134185                               | 0.519933555                      | 0.040119834                                      | 0.00447563                                          | 25.11501597                            |
| 368.782716                                | 0.583573487                      | 0.034403292                                      | 0.005321134                                         | 13.93333333                            |
| 1346.603414                               | 0.439411425                      | 0.042866892                                      | 0.00345983                                          | 65.28627708                            |
| 710.7768817                               | 0.519190509                      | 0.039776997                                      | 0.00379832                                          | 29.59408602                            |
| 1005.378072                               | 0.599433428                      | 0.030606666                                      | 0.003411106                                         | 32.38185255                            |
| 879.2440605                               | 0.364280094                      | 0.039681577                                      | 0.007411488                                         | 36.74514039                            |
| 1644.140046                               | 0.543567159                      | 0.037929205                                      | 0.00312782                                          | 65.54166667                            |
| 1992.77979                                | 0.353794266                      | 0.045447523                                      | 0.003703894                                         | 75.34890372                            |
| 1059.173913                               | 0.554353173                      | 0.034688602                                      | 0.004087244                                         | 39.09405501                            |
| 52.50769231                               | 0.625                            | 0.039526627                                      | 0.016963908                                         | 2.569230769                            |
| 174.7914692                               | 0.635542169                      | 0.037443004                                      | 0.01107709                                          | 7.900473934                            |
| 852.993763                                | 0.476237624                      | 0.037839135                                      | 0.003275649                                         | 36.4012474                             |
| 1439.213298                               | 0.527430556                      | 0.034932982                                      | 0.002841393                                         | 53.06319947                            |
| 1514.276029                               | 0.492546213                      | 0.039768364                                      | 0.001678105                                         | 65.69733656                            |
| 336.4477612                               | 0.481437126                      | 0.051025965                                      | 0.008626953                                         | 20.51243781                            |
| 558.0927487                               | 0.565300286                      | 0.035605228                                      | 0.003944215                                         | 21.11467116                            |
| 682.4162562                               | 0.550881954                      | 0.035872018                                      | 0.003804108                                         | 29.12807882                            |
| 458.0684932                               | 0.536201469                      | 0.041808204                                      | 0.005796033                                         | 21.36399217                            |
| 886.2919634                               | 0.598660171                      | 0.032188093                                      | 0.007766565                                         | 31.64089522                            |
| 466.0617284                               | 0.553170732                      | 0.03817549                                       | 0.004448486                                         | 21.64550265                            |
| 1076.957963                               | 0.658679446                      | 0.026159856                                      | 0.001908488                                         | 32.35974131                            |
| 919.8342023                               | 0.43043088                       | 0.044818801                                      | 0.00767555                                          | 42.98123045                            |
| 2127.231463                               | 0.597515237                      | 0.026708372                                      | 0.00096314                                          | 68.07963907                            |
| 317.300578                                | 0.59348199                       | 0.035818103                                      | 0.006862894                                         | 12.39306358                            |
| 70.27272727                               | 0.656716418                      | 0.046229339                                      | 0.015884318                                         | 4.068181818                            |
| 238.7272727                               | 0.575452716                      | 0.040466526                                      | 0.005608427                                         | 11.57342657                            |
| 1550.80292                                | 0.480140187                      | 0.041347731                                      | 0.002924428                                         | 67.9756691                             |
| 425.7494457                               | 0.545344619                      | 0.035225982                                      | 0.005092841                                         | 15.88691796                            |
| 1850.017404                               | 0.526302015                      | 0.033938401                                      | 0.002627375                                         | 68.25012432                            |
| 283.660066                                | 0.512690355                      | 0.045670904                                      | 0.014369932                                         | 13.83828383                            |
| 2095.649705                               | 0.337421432                      | 0.041652415                                      | 0.003466713                                         | 91.67696502                            |
| 447.9548872                               | 0.60523322                       | 0.034859235                                      | 0.002136581                                         | 18.54511278                            |
| 1021.68917                                | 0.648426813                      | 0.024644871                                      | 0.001690388                                         | 35.04500703                            |
| 528.6046512                               | 0.532095901                      | 0.038944193                                      | 0.003305876                                         | 26.79360465                            |
| 326.3194805                               | 0.472972973                      | 0.038205431                                      | 0.005239596                                         | 14.70909091                            |
| 432.1131222                               | 0.501702611                      | 0.032227022                                      | 0.003255027                                         | 14.24434389                            |
| 1107.687813                               | 0.565361019                      | 0.034202803                                      | 0.003219315                                         | 40.97495826                            |
| 3002.762995                               | 0.589996349                      | 0.030700307                                      | 0.000983123                                         | 99.22339109                            |
| 1362.437193                               | 0.461165049                      | 0.042754817                                      | 0.001824472                                         | 60.92561404                            |
| 756.3208489                               | 0.293299158                      | 0.047778916                                      | 0.001997042                                         | 38.27091136                            |
| 115.2272727                               | 0.608294931                      | 0.04476584                                       | 0.02239236                                          | 5.909090909                            |
| 897.2334004                               | 0.640051513                      | 0.027055694                                      | 0.001922079                                         | 26.89336016                            |
| 211.641791                                | 0.680203046                      | 0.031243039                                      | 0.005599539                                         | 8.373134328                            |
| 1534.986164                               | 0.497341257                      | 0.037048376                                      | 0.003624585                                         | 58.90691824                            |
| 243.4518519                               | 0.605381166                      | 0.039561043                                      | 0.008810972                                         | 10.68148148                            |
| 1138.743298                               | 0.612133267                      | 0.033027774                                      | 0.002083998                                         | 40.65718928                            |
| 1315.124174                               | 0.498026316                      | 0.033545124                                      | 0.005751751                                         | 50.78731836                            |
| 538.1308901                               | 0.507528787                      | 0.039152801                                      | 0.008021282                                         | 22.43455497                            |
| 2104.135957                               | 0.432662539                      | 0.032675587                                      | 0.001223965                                         | 73.06261181                            |
| 2473.428184                               | 0.384603931                      | 0.040599446                                      | 0.002293448                                         | 104.8683701                            |
| 4007.431214                               | 0.459259259                      | 0.041905509                                      | 0.001437614                                         | 176.6736243                            |
| 487.6485569                               | 0.527777778                      | 0.039527731                                      | 0.005380831                                         | 23.28183362                            |
| 551.8512658                               | 0.565801253                      | 0.039231493                                      | 0.005666657                                         | 24.7943038                             |
| 351.4631043                               | 0.644262295                      | 0.026824389                                      | 0.006073558                                         | 10.54198473                            |
| 930.7103321                               | 0.614512472                      | 0.03028962                                       | 0.004039191                                         | 32.83394834                            |
| 1478.037576                               | 0.579761068                      | 0.033501561                                      | 0.00225269                                          | 55.27757576                            |
| 237.6446886                               | 0.541666667                      | 0.040615063                                      | 0.005334348                                         | 11.08791209                            |
| 709.0395809                               | 0.640566741                      | 0.032689553                                      | 0.003346376                                         | 28.08032596                            |
| 1677.761493                               | 0.662249284                      | 0.030298634                                      | 0.001098573                                         | 56.02217415                            |
| 84.94174757                               | 0.710344828                      | 0.040625884                                      | 0.019092256                                         | 4.184466019                            |
| 1752.929282                               | 0.533765851                      | 0.032942828                                      | 0.002831355                                         | 59.62651934                            |
| 2345.2                                    | 0.522279036                      | 0.034004108                                      | 0.001627314                                         | 97.25174825                            |
| 421.7561521                               | 0.574550129                      | 0.031985546                                      | 0.003240581                                         | 14.29753915                            |
| 789.1866667                               | 0.628221649                      | 0.031653912                                      | 0.002792423                                         | 30.8625641                             |
| 64.25714286                               | 0.382513661                      | 0.063673469                                      | 0.017748788                                         | 4.457142857                            |
| 62.26470588                               | 0.647619048                      | 0.03633218                                       | 0.016094329                                         | 2.470588235                            |
| 1501.158827                               | 0.411823899                      | 0.039438101                                      | 0.001988346                                         | 64.56017104                            |
| 413.2959641                               | 0.631728045                      | 0.026905803                                      | 0.005239131                                         | 12                                     |
| 547.1558029                               | 0.615459883                      | 0.03325995                                       | 0.002894242                                         | 20.92050874                            |
| 1951.43975                                | 0.509290954                      | 0.030400639                                      | 0.001638427                                         | 63.32453193                            |
| 2190.213242                               | 0.400620048                      | 0.044252086                                      | 0.001931054                                         | 102.9303525                            |
| 136.5858586                               | 0.782608696                      | 0.019385777                                      | 0.006509108                                         | 3.838383838                            |
| 677.5911602                               | 0.595394737                      | 0.025636427                                      | 0.003298848                                         | 18.56077348                            |
| 69.88372093                               | 0.699186992                      | 0.043537047                                      | 0.016481082                                         | 3.744186047                            |
| 187.5714286                               | 0.591029024                      | 0.03260523                                       | 0.005520992                                         | 7.303571429                            |
| 404.4310722                               | 0.566294919                      | 0.029471053                                      | 0.00653742                                          | 13.46827133                            |

| wavelet.LHL_gldzm_HighIntensityLargeDistanceEmphasis | wavelet.LHL_gldzm_SmallDistanceEmphasis | wavelet.LHL_glcm_SumVariance | wavelet.LHL_glcm_Homogeneity1 | wavelet.LHL_glcm_Homogeneity2 |
|------------------------------------------------------|-----------------------------------------|------------------------------|-------------------------------|-------------------------------|
| 1096.661098                                          | 0.974940334                             | 3225.525175                  | 0.217458061                   | 0.131856394                   |
| 590.4186047                                          | 0.974709302                             | 1507.804537                  | 0.3130268                     | 0.231823088                   |
| 704.7178571                                          | 0.965178571                             | 1827.592446                  | 0.206642629                   | 0.118836335                   |
| 2104.754407                                          | 0.949848024                             | 5769.389415                  | 0.200423549                   | 0.119934425                   |
| 679.9806763                                          | 0.960144928                             | 1957.455393                  | 0.244492335                   | 0.153935067                   |
| 509.2291105                                          | 0.949460916                             | 1108.655374                  | 0.227757599                   | 0.137209281                   |
| 1357.635071                                          | 0.900473934                             | 3176.016526                  | 0.213526967                   | 0.125136893                   |
| 1845.720121                                          | 0.936459909                             | 4964.895404                  | 0.185912036                   | 0.102326221                   |
| 2191.880159                                          | 0.973809524                             | 6643.286264                  | 0.209506996                   | 0.123724112                   |
| 1400.44284                                           | 0.976534296                             | 4256.901603                  | 0.245142723                   | 0.1550961                     |
| 957.3826087                                          | 0.941304348                             | 2313.86841                   | 0.243734223                   | 0.154124954                   |
| 1673.504172                                          | 0.950834327                             | 4551.671173                  | 0.217671663                   | 0.130413192                   |
| 3500.726729                                          | 0.966695132                             | 10296.26463                  | 0.221483809                   | 0.134544516                   |
| 396.983209                                           | 0.960820896                             | 1001.531117                  | 0.2764045                     | 0.183688867                   |
| 4271.311734                                          | 0.94352014                              | 12395.87553                  | 0.204679627                   | 0.119895918                   |
| 2388.375157                                          | 0.969259724                             | 7375.539112                  | 0.371659857                   | 0.300620486                   |
| 1172.859564                                          | 0.894673123                             | 2785.893537                  | 0.22086904                    | 0.134657534                   |
| 1903.282277                                          | 0.981355253                             | 5634.481358                  | 0.243229592                   | 0.15694284                    |
| 613.1452991                                          | 0.933760684                             | 1389.741632                  | 0.216986422                   | 0.12949148                    |
| 942.6993569                                          | 0.975884244                             | 2631.695434                  | 0.304956671                   | 0.224192999                   |
| 1016.137009                                          | 0.955918119                             | 2648.281329                  | 0.285668883                   | 0.203757493                   |
| 2107.536122                                          | 0.941539924                             | 5618.475878                  | 0.207265851                   | 0.123476316                   |
| 989.5519943                                          | 0.969017094                             | 2796.845544                  | 0.270618607                   | 0.185103698                   |
| 3649.532934                                          | 0.885479042                             | 8320.428823                  | 0.169242673                   | 0.090291899                   |
| 682.7955272                                          | 0.954472843                             | 1621.491197                  | 0.267979034                   | 0.179509352                   |
| 933.1753086                                          | 0.964814815                             | 2539.231729                  | 0.228584543                   | 0.141325075                   |
| 675.9619173                                          | 0.953709783                             | 1701.032343                  | 0.291591104                   | 0.2034732                     |
| 794.3548387                                          | 0.982862903                             | 2296.078638                  | 0.27410823                    | 0.183316707                   |
| 816.4858223                                          | 0.980860113                             | 2152.008681                  | 0.224687185                   | 0.138146349                   |
| 482.8920086                                          | 0.980561555                             | 1287.616448                  | 0.360273645                   | 0.286550321                   |
| 836.1521991                                          | 0.981336806                             | 2458.406899                  | 0.250294562                   | 0.160305148                   |
| 575.8918017                                          | 0.980695901                             | 1495.700672                  | 0.351163092                   | 0.26889581                    |
| 705.3762201                                          | 0.976708075                             | 1959.765545                  | 0.230882772                   | 0.143544523                   |
| 1816.523077                                          | 0.919230769                             | 3748.766529                  | 0.212164609                   | 0.13152488                    |
| 453.4312796                                          | 0.928909953                             | 1037.027715                  | 0.220639816                   | 0.131459684                   |
| 943.9449064                                          | 0.954781705                             | 2322.509807                  | 0.262041095                   | 0.173718015                   |
| 862.8847926                                          | 0.979756419                             | 2390.410844                  | 0.248346388                   | 0.159593137                   |
| 1333.590799                                          | 0.967312349                             | 3932.507169                  | 0.269889094                   | 0.182692025                   |
| 461.8631841                                          | 0.932835821                             | 1091.758399                  | 0.272405767                   | 0.178866161                   |
| 842.1231029                                          | 0.977234401                             | 2283.444532                  | 0.233851002                   | 0.144898232                   |
| 1235.850985                                          | 0.934421182                             | 3201.40361                   | 0.24090112                    | 0.151602036                   |
| 525.6516634                                          | 0.95890411                              | 1390.940161                  | 0.247931673                   | 0.157738623                   |
| 709.180061                                           | 0.961088505                             | 1780.683239                  | 0.213927414                   | 0.128377703                   |
| 746.6507937                                          | 0.925925926                             | 1653.471027                  | 0.235869654                   | 0.146314078                   |
| 1797.856912                                          | 0.94785772                              | 5081.373325                  | 0.190177822                   | 0.106397897                   |
| 403.7413973                                          | 0.984358707                             | 1037.950945                  | 0.314232275                   | 0.227131893                   |
| 5408.288741                                          | 0.931737936                             | 14973.05894                  | 0.210983147                   | 0.129118352                   |
| 621.6011561                                          | 0.967485549                             | 1482.633437                  | 0.217902811                   | 0.129539319                   |
| 519.5454545                                          | 0.914772727                             | 1180.700244                  | 0.225849676                   | 0.13345482                    |
| 855.9335664                                          | 0.931818182                             | 2044.86626                   | 0.234379649                   | 0.143071437                   |
| 710.5948905                                          | 0.97810219                              | 2003.041135                  | 0.278968421                   | 0.191467853                   |
| 724.9667406                                          | 0.978381375                             | 1990.663018                  | 0.245885261                   | 0.156158555                   |
| 951.3371457                                          | 0.968672302                             | 2637.204711                  | 0.248530485                   | 0.161172008                   |
| 338.2805281                                          | 0.975247525                             | 856.5529814                  | 0.254767496                   | 0.16278643                    |
| 713.2049069                                          | 0.981599273                             | 2035.505749                  | 0.372174777                   | 0.302375607                   |
| 1189.721805                                          | 0.935150376                             | 2996.403929                  | 0.217923984                   | 0.13107334                    |
| 2295.802391                                          | 0.872890295                             | 5217.864203                  | 0.18077273                    | 0.101458229                   |
| 1097.52907                                           | 0.899709302                             | 2536.181684                  | 0.234909984                   | 0.145773                      |
| 833.2909091                                          | 0.937662338                             | 2181.588036                  | 0.29158169                    | 0.209187619                   |
| 2629.10181                                           | 0.991515837                             | 8717.740729                  | 0.265905737                   | 0.184157444                   |
| 915.015025                                           | 0.97057596                              | 2475.268                     | 0.233335401                   | 0.146023375                   |
| 2109.644493                                          | 0.97238552                              | 6432.505589                  | 0.221744091                   | 0.13490934                    |
| 1251.479298                                          | 0.983157895                             | 3838.012825                  | 0.300926098                   | 0.218395941                   |
| 1596.852684                                          | 0.978464419                             | 5150.275474                  | 0.400748937                   | 0.330317393                   |
| 324.0757576                                          | 0.948863636                             | 774.6608132                  | 0.244088529                   | 0.153046463                   |
| 2298.167002                                          | 0.961519115                             | 6795.317882                  | 0.198078061                   | 0.11738273                    |
| 1131.358209                                          | 0.910447761                             | 2577.579132                  | 0.1934221                     | 0.108285859                   |
| 696.9666667                                          | 0.986792453                             | 1962.579441                  | 0.263992422                   | 0.177050819                   |
| 563.6851852                                          | 0.961111111                             | 1378.658397                  | 0.222452515                   | 0.132877218                   |
| 1338.056052                                          | 0.970755483                             | 3823.954715                  | 0.216498701                   | 0.130036616                   |
| 833.8672391                                          | 0.946994716                             | 1977.322427                  | 0.267302106                   | 0.184074157                   |
| 538.0855148                                          | 0.976439791                             | 1311.073111                  | 0.259500708                   | 0.170658304                   |
| 1870.416816                                          | 0.977191413                             | 5779.335148                  | 0.301910477                   | 0.224266475                   |
| 840.0100658                                          | 0.983739837                             | 2458.771946                  | 0.33080239                    | 0.251732979                   |
| 1118.149431                                          | 0.98096537                              | 3408.98777                   | 0.286603489                   | 0.199747146                   |
| 663.7164686                                          | 0.928692699                             | 1436.257229                  | 0.246414794                   | 0.155844219                   |
| 842.8655063                                          | 0.948971519                             | 2078.889843                  | 0.232397075                   | 0.14146733                    |
| 1767.366412                                          | 0.958015267                             | 4842.97989                   | 0.198286826                   | 0.114271194                   |
| 912.2785978                                          | 0.942573801                             | 2145.52328                   | 0.213583176                   | 0.126437427                   |
| 1064.042424                                          | 0.958636364                             | 2839.825641                  | 0.231579933                   | 0.144509753                   |
| 1132.893773                                          | 0.947802198                             | 2644.216978                  | 0.24883841                    | 0.15914066                    |
| 1252.639115                                          | 0.927532014                             | 3001.409015                  | 0.206684369                   | 0.118964629                   |
| 1836.660357                                          | 0.96349378                              | 5359.913473                  | 0.19602287                    | 0.11192413                    |
| 434.4757282                                          | 0.927184466                             | 1090.347434                  | 0.204895852                   | 0.116747671                   |
| 920.6232044                                          | 0.987983425                             | 2655.064562                  | 0.248054987                   | 0.163985525                   |
| 1453.083217                                          | 0.925                                   | 3491.661244                  | 0.245559628                   | 0.156937008                   |
| 1547.776286                                          | 0.978187919                             | 4633.082801                  | 0.231488349                   | 0.143111003                   |
| 1291.249231                                          | 0.92                                    | 3155.164479                  | 0.200337546                   | 0.113422812                   |
| 394.5571429                                          | 0.967857143                             | 1106.000624                  | 0.342714691                   | 0.254875165                   |
| 1426.852941                                          | 0.966911765                             | 4337.95672                   | 0.207883746                   | 0.123371211                   |
| 1409.053146                                          | 0.967470984                             | 4238.606154                  | 0.308918205                   | 0.225479593                   |
| 1007.721973                                          | 0.971412556                             | 2609.805466                  | 0.201643372                   | 0.116832313                   |
| 1288.27663                                           | 0.947535771                             | 3449.455081                  | 0.216841234                   | 0.130239778                   |
| 1529.506961                                          | 0.975516083                             | 4436.623431                  | 0.254152288                   | 0.1695918                     |
| 979.2214101                                          | 0.977429063                             | 2893.177272                  | 0.307194406                   | 0.219869268                   |
| 2828.444444                                          | 0.856060606                             | 5687.592186                  | 0.132175158                   | 0.06363268                    |
| 1663.620166                                          | 0.975138122                             | 4910.815796                  | 0.216060521                   | 0.131654918                   |
| 544.7209302                                          | 0.921511628                             | 1187.835445                  | 0.204929312                   | 0.118193191                   |
| 2683.294643                                          | 0.933035714                             | 7121.360492                  | 0.213901513                   | 0.12681239                    |
| 1666.229759                                          | 0.95404814                              | 4651.403238                  | 0.237016041                   | 0.153933478                   |

| wavelet.LHL_glcml_ClusterShade | wavelet.LHL_glcml_MaximumProbability | wavelet.LHL_glcml_ldmn | wavelet.LHL_glcml_SumVariance2 | wavelet.LHL_glcml_Contrast | wavelet.LHL_glcml_DifferenceEntropy |
|--------------------------------|--------------------------------------|------------------------|--------------------------------|----------------------------|-------------------------------------|
| 3.087189139                    | 0.011595584                          | 0.9691961              | 178.0742078                    | 125.0555785                | 4.394680807                         |
| 297.0555553                    | 0.024832172                          | 0.974072033            | 93.40469159                    | 56.7982563                 | 3.900741676                         |
| 443.1503225                    | 0.013291371                          | 0.96648586             | 131.3450918                    | 106.3250023                | 4.320575852                         |
| 1559.527663                    | 0.007280157                          | 0.976938264            | 241.0127106                    | 187.0024389                | 4.719229293                         |
| -659.0733579                   | 0.014405335                          | 0.964992657            | 115.7821405                    | 70.66892118                | 4.005638004                         |
| 230.1228524                    | 0.011038224                          | 0.959836999            | 95.22294507                    | 76.51732778                | 4.110573291                         |
| -241.8205657                   | 0.012588875                          | 0.965293792            | 112.9088184                    | 89.43739829                | 4.161733455                         |
| -634.1222922                   | 0.005438397                          | 0.96771151             | 271.575627                     | 153.9183248                | 4.604803986                         |
| -813.4452844                   | 0.006972087                          | 0.97820179             | 199.3585401                    | 137.7299692                | 4.503317372                         |
| 251.6647932                    | 0.008161642                          | 0.983922256            | 142.4046863                    | 78.31084211                | 4.14957757                          |
| 309.8079725                    | 0.009933864                          | 0.969735523            | 126.86701                      | 79.21953515                | 4.136825783                         |
| 2314.731811                    | 0.006550899                          | 0.979241159            | 254.0821921                    | 104.4229729                | 4.353788384                         |
| 9477.18052                     | 0.006445697                          | 0.987947917            | 396.3001788                    | 154.1768867                | 4.451098232                         |
| 17.5805848                     | 0.011234395                          | 0.966899099            | 67.01801757                    | 46.158452                  | 3.781006484                         |
| 376.2494372                    | 0.008650394                          | 0.98161232             | 175.0512816                    | 137.9362318                | 4.457266439                         |
| 62.9930535                     | 0.060235808                          | 0.992508155            | 83.03378856                    | 60.15558851                | 3.738067479                         |
| -782.6855708                   | 0.008921385                          | 0.955822057            | 148.5389001                    | 110.5664863                | 4.300479651                         |
| 2639.07808                     | 0.008473812                          | 0.984977518            | 270.5836033                    | 104.9362612                | 4.290573544                         |
| 186.3225013                    | 0.008692438                          | 0.949414215            | 139.9425167                    | 95.0106573                 | 4.210427341                         |
| 159.1807637                    | 0.027057238                          | 0.980181185            | 77.01861916                    | 69.13866253                | 4.015245173                         |
| 242.5300393                    | 0.029959497                          | 0.980624107            | 96.81679925                    | 74.3533552                 | 4.096483109                         |
| 3103.373543                    | 0.007121034                          | 0.978090794            | 296.2083189                    | 190.2437832                | 4.631384477                         |
| 14.44326753                    | 0.019582896                          | 0.979856812            | 102.8887491                    | 71.77532987                | 4.070758966                         |
| -2192.32828                    | 0.008585067                          | 0.967955371            | 243.9322068                    | 215.7222914                | 4.67349547                          |
| 405.2913795                    | 0.013881128                          | 0.980996873            | 89.0105274                     | 62.17556681                | 4.002669314                         |
| 275.3250767                    | 0.010018704                          | 0.969236164            | 140.8796348                    | 98.31412523                | 4.290471695                         |
| 119.6958828                    | 0.016827496                          | 0.982024292            | 68.7798387                     | 50.74027197                | 3.874600648                         |
| 88.03832877                    | 0.012330288                          | 0.980268319            | 98.02614396                    | 53.99834932                | 3.897356013                         |
| 1539.075678                    | 0.007879384                          | 0.974624156            | 171.7930014                    | 101.0820026                | 4.320391527                         |
| 534.4673764                    | 0.055961772                          | 0.984132949            | 79.1775271                     | 49.35926452                | 3.739479274                         |
| -126.7759342                   | 0.008543802                          | 0.977026106            | 122.4179911                    | 68.07836638                | 4.081699108                         |
| 272.9603409                    | 0.026540074                          | 0.987404563            | 65.76564371                    | 33.78055132                | 3.564067487                         |
| 194.0436232                    | 0.008244864                          | 0.967189015            | 127.4627648                    | 92.89998446                | 4.286978956                         |
| -4133.014186                   | 0.025665988                          | 0.951151938            | 269.2427383                    | 181.0835456                | 4.258720885                         |
| -135.6017958                   | 0.011255806                          | 0.94571987             | 148.1114735                    | 82.95396909                | 4.163160977                         |
| 318.293938                     | 0.010436597                          | 0.977419054            | 105.3327696                    | 76.92094872                | 4.077766684                         |
| 222.2871717                    | 0.007370003                          | 0.980221228            | 141.0677971                    | 77.95175605                | 4.157935144                         |
| -53.85784865                   | 0.020888839                          | 0.981055045            | 81.81720862                    | 67.34824301                | 4.043956728                         |
| -50.21873972                   | 0.013990943                          | 0.97033721             | 53.68168101                    | 45.6900041                 | 3.785047689                         |
| 229.5677867                    | 0.011686612                          | 0.970933365            | 124.909126                     | 88.8883614                 | 4.221403894                         |
| 91.62899029                    | 0.011155218                          | 0.979105995            | 112.1703184                    | 92.3322337                 | 4.229388916                         |
| 79.29500218                    | 0.008641898                          | 0.955877916            | 92.50736741                    | 66.65065333                | 4.028978911                         |
| 203.1239855                    | 0.007382344                          | 0.961115897            | 161.9546707                    | 117.7002928                | 4.389141731                         |
| 55.59490158                    | 0.00979221                           | 0.969878189            | 101.732855                     | 80.9624101                 | 4.180519488                         |
| -1659.017897                   | 0.004815274                          | 0.972399183            | 274.4123744                    | 155.3962534                | 4.623463421                         |
| 141.7202908                    | 0.020830393                          | 0.980395804            | 58.79602501                    | 43.93076571                | 3.736229396                         |
| 357.1949109                    | 0.007296079                          | 0.98361041             | 235.1968348                    | 207.4878765                | 4.705713852                         |
| 648.2547761                    | 0.010554279                          | 0.963161425            | 127.0138963                    | 92.03347567                | 4.265021438                         |
| -837.8793751                   | 0.029546055                          | 0.941458961            | 129.3245156                    | 71.71645615                | 3.870950219                         |
| -254.1437548                   | 0.009885799                          | 0.962321252            | 103.1146923                    | 71.66715478                | 4.077042244                         |
| 16.78716926                    | 0.01396097                           | 0.975201408            | 85.26825553                    | 61.35471134                | 3.97615923                          |
| 86.8075106                     | 0.008254661                          | 0.963659571            | 179.6784091                    | 69.43048445                | 4.070425614                         |
| 453.9956274                    | 0.009603165                          | 0.981385831            | 142.1171342                    | 83.01238489                | 4.202972115                         |
| 34.07657171                    | 0.01254159                           | 0.956608238            | 67.51097823                    | 54.06762083                | 3.919883831                         |
| 298.043791                     | 0.065613639                          | 0.979230754            | 90.2406706                     | 60.07181494                | 3.782081464                         |
| -562.6062087                   | 0.007367614                          | 0.966254135            | 142.5477892                    | 104.0233525                | 4.331013157                         |
| -2043.671343                   | 0.004557519                          | 0.957779899            | 303.9858178                    | 210.5708762                | 4.760174533                         |
| -137.1895619                   | 0.01033168                           | 0.981044111            | 112.5243915                    | 94.27199513                | 4.235369666                         |
| -286.8044374                   | 0.029828177                          | 0.968559809            | 87.72552895                    | 66.74906318                | 4.00326006                          |
| -2218.107468                   | 0.024897768                          | 0.976478583            | 182.265915                     | 187.86139                  | 4.331147431                         |
| 536.1141469                    | 0.008330084                          | 0.977157874            | 139.1367556                    | 93.46987776                | 4.265675171                         |
| 601.5566927                    | 0.007029215                          | 0.981874101            | 181.3004887                    | 114.2299221                | 4.415949618                         |
| 212.6936914                    | 0.027920481                          | 0.985347569            | 73.23743229                    | 65.88388799                | 3.981268167                         |
| 88.13746111                    | 0.058522064                          | 0.989481677            | 54.32120013                    | 34.49539416                | 3.435619975                         |
| -90.66762136                   | 0.015612691                          | 0.937600109            | 116.1047426                    | 65.15874648                | 3.895300555                         |
| 1192.569947                    | 0.008353273                          | 0.978166209            | 258.7574425                    | 192.708821                 | 4.714905524                         |
| -507.5862256                   | 0.009222691                          | 0.958368464            | 224.2650343                    | 125.2353768                | 4.406377064                         |
| 317.0501275                    | 0.015656775                          | 0.97627187             | 122.0622357                    | 71.10654255                | 4.083570523                         |
| 49.93802116                    | 0.010234681                          | 0.951119645            | 102.9030938                    | 83.05115494                | 4.111321113                         |
| 732.0119003                    | 0.006799092                          | 0.978389322            | 157.4870942                    | 116.9943359                | 4.421583309                         |
| 362.7387495                    | 0.017031369                          | 0.970920966            | 143.3625513                    | 93.78327328                | 4.199935262                         |
| 247.0333383                    | 0.009836357                          | 0.967636845            | 105.0540676                    | 64.55888955                | 3.995192084                         |
| 55.37592671                    | 0.034701501                          | 0.98227322             | 131.9841725                    | 102.0344173                | 4.173727962                         |
| 44.80169178                    | 0.037922141                          | 0.986197309            | 80.22650783                    | 53.78599227                | 3.844103657                         |
| 78.71648572                    | 0.016292717                          | 0.985627747            | 76.95616138                    | 59.29256399                | 3.968794691                         |
| 134.0366784                    | 0.010543413                          | 0.965163649            | 99.2777781                     | 69.9772098                 | 4.090895852                         |
| 69.76432718                    | 0.010279745                          | 0.974623632            | 98.9656078                     | 75.74702923                | 4.140185015                         |
| -240.7455643                   | 0.007691138                          | 0.968874378            | 287.8754814                    | 144.1705998                | 4.514673679                         |
| 645.7300289                    | 0.006814789                          | 0.965669066            | 176.2396036                    | 110.0984769                | 4.386784626                         |
| 513.9173716                    | 0.008581584                          | 0.979169313            | 148.5340148                    | 89.68684922                | 4.274231997                         |
| 402.4885346                    | 0.011882402                          | 0.976373595            | 109.8944206                    | 76.65666377                | 4.077152258                         |
| -134.974995                    | 0.006763783                          | 0.968856798            | 146.603926                     | 109.2936627                | 4.385496458                         |
| 299.3062416                    | 0.005291288                          | 0.981522361            | 205.1863745                    | 140.3675106                | 4.586368054                         |
| 15.32344199                    | 0.021647448                          | 0.94949521             | 151.7433671                    | 98.62966743                | 4.101760379                         |
| 728.8089407                    | 0.011725538                          | 0.969333557            | 152.1851376                    | 107.8030231                | 4.311391982                         |
| 450.3847549                    | 0.006614568                          | 0.984296255            | 152.8493232                    | 83.16727358                | 4.193977408                         |
| 146.20335                      | 0.010762336                          | 0.980825939            | 146.41138887                   | 98.0389227                 | 4.223891952                         |
| -321.0496662                   | 0.005850523                          | 0.969324496            | 199.6502624                    | 115.0603006                | 4.443153144                         |
| -127.7699173                   | 0.034563059                          | 0.968223285            | 37.88481839                    | 31.48553887                | 3.351034351                         |
| -2714.035902                   | 0.025579198                          | 0.958300171            | 229.7189028                    | 135.6535579                | 4.075499502                         |
| -72.57015321                   | 0.023370998                          | 0.982970895            | 90.30692873                    | 54.41153274                | 3.873682415                         |
| 1695.914372                    | 0.008479526                          | 0.964032234            | 269.3684672                    | 128.458763                 | 4.469075913                         |
| -155.8427295                   | 0.008202926                          | 0.972263917            | 139.6347623                    | 103.3727575                | 4.350312724                         |
| 2052.266655                    | 0.01329348                           | 0.984163201            | 199.2313999                    | 99.53765291                | 4.280967284                         |
| 158.7194033                    | 0.019722542                          | 0.983592895            | 68.31239077                    | 44.47408015                | 3.769497897                         |
| 5086.669151                    | 0.009283489                          | 0.935505076            | 574.3724731                    | 436.1980753                | 5.097452032                         |
| -587.2428766                   | 0.00681035                           | 0.978916367            | 300.1831436                    | 131.2093269                | 4.462029963                         |
| -267.7736641                   | 0.018650363                          | 0.927501174            | 197.4225375                    | 106.0068949                | 4.091194135                         |
| -176.8664883                   | 0.012427417                          | 0.978119371            | 197.0940984                    | 151.4231995                | 4.323172027                         |
| -473.5468482                   | 0.013713864                          | 0.974833165            | 181.4203303                    | 133.7062261                | 4.409189113                         |









| wavelet.LHL_firorder_Uniformity | wavelet.LHL_firorder_MeanAbsoluteDeviation | wavelet.LHL_firorder_Energy | wavelet.LHL_firorder_RobustMeanAbsoluteDeviation | wavelet.LHL_firorder_Median |
|---------------------------------|--------------------------------------------|-----------------------------|--------------------------------------------------|-----------------------------|
| 0.038291777                     | 163.0874275                                | 33714137.26                 | 105.540517                                       | -14.80239348                |
| 0.061185754                     | 105.6281688                                | 43660642.9                  | 64.34215446                                      | -10.36607441                |
| 0.042738219                     | 144.2089577                                | 15992722.32                 | 104.37445474                                     | -34.04714826                |
| 0.03403044                      | 182.0138972                                | 163144989.6                 | 112.1216663                                      | 0.537955366                 |
| 0.050628099                     | 126.279349                                 | 9502196.065                 | 85.85618362                                      | 2.713722171                 |
| 0.045260721                     | 128.0120576                                | 16598517.19                 | 90.47000127                                      | -22.22395189                |
| 0.046606028                     | 129.8791125                                | 10186257.96                 | 88.20217668                                      | 54.41033212                 |
| 0.02911343                      | 199.5692546                                | 61674996.33                 | 142.8517532                                      | -22.77475009                |
| 0.036973644                     | 162.8273353                                | 99784077.36                 | 104.5286215                                      | -0.338117377                |
| 0.044237499                     | 135.7798508                                | 105387769                   | 85.16707583                                      | -20.77835081                |
| 0.042655012                     | 136.0113029                                | 25006001.58                 | 93.15321555                                      | 9.584475397                 |
| 0.033967666                     | 176.1121527                                | 77818710.84                 | 117.3240865                                      | -39.89268572                |
| 0.033287644                     | 199.1469539                                | 164442025.3                 | 118.3143608                                      | -18.1750151                 |
| 0.054843334                     | 104.6144025                                | 19335212.08                 | 72.98034193                                      | 10.95624532                 |
| 0.035787744                     | 168.4371694                                | 45382602.39                 | 113.0471781                                      | 17.89262878                 |
| 0.103142801                     | 86.60027147                                | 147713419.5                 | 39.04738464                                      | -3.131277057                |
| 0.038837941                     | 156.2140655                                | 26494268.07                 | 109.6698565                                      | 7.354309213                 |
| 0.036484705                     | 168.3819681                                | 123233746                   | 104.6089222                                      | -15.35259049                |
| 0.039867267                     | 146.8833389                                | 18950532.28                 | 105.6806751                                      | 9.538126777                 |
| 0.061458262                     | 102.0518078                                | 56374235.81                 | 62.21615961                                      | -0.614967356                |
| 0.059080015                     | 113.3231504                                | 135337686.5                 | 66.84961975                                      | -14.08186591                |
| 0.03194159                      | 197.549166                                 | 126437648.6                 | 120.4853523                                      | -14.32643                   |
| 0.052357214                     | 118.9726968                                | 71515665.19                 | 74.56989444                                      | -11.5303227                 |
| 0.029343753                     | 206.4428613                                | 36138913.84                 | 133.9970592                                      | -4.424117744                |
| 0.051493637                     | 116.7582006                                | 29576162.62                 | 74.8203268                                       | -21.03291595                |
| 0.040698785                     | 146.0730392                                | 24996750.25                 | 97.01412785                                      | -9.969390402                |
| 0.061873166                     | 97.39463824                                | 60639360.23                 | 61.00515749                                      | 0.001284861                 |
| 0.049736327                     | 117.2898708                                | 35765424.2                  | 77.28826361                                      | -33.36113421                |
| 0.037338234                     | 159.5684429                                | 84326013.52                 | 105.9079963                                      | -97.0945244                 |
| 0.082255557                     | 90.82577412                                | 47724104.45                 | 49.77357936                                      | -8.628525247                |
| 0.044953607                     | 128.2126674                                | 88967239.62                 | 84.64816504                                      | 6.051900054                 |
| 0.074850604                     | 84.72958435                                | 85428254.13                 | 50.13169802                                      | -7.06599465                 |
| 0.041067831                     | 139.8630248                                | 65319008.44                 | 95.11947272                                      | -7.575428097                |
| 0.049001479                     | 174.888332                                 | 6584491.001                 | 94.73317221                                      | -0.867107209                |
| 0.039029612                     | 152.6500808                                | 11368642.31                 | 111.0312979                                      | -10.27228417                |
| 0.051318498                     | 118.14522                                  | 51988317.53                 | 73.73419962                                      | -9.50318261                 |
| 0.041646653                     | 139.2818666                                | 99517419.4                  | 93.16671623                                      | -39.25764484                |
| 0.05632058                      | 109.0041574                                | 74471872.74                 | 67.82117132                                      | -3.827082147                |
| 0.062500627                     | 94.23846885                                | 12377174.55                 | 63.87349616                                      | 15.30600931                 |
| 0.044666444                     | 134.0315157                                | 32840441.11                 | 86.48661999                                      | -17.75139402                |
| 0.046989059                     | 127.9067186                                | 45400754.44                 | 80.27279398                                      | -23.77531973                |
| 0.046937434                     | 123.1693696                                | 22475336.09                 | 87.49753845                                      | -0.402648415                |
| 0.03783301                      | 153.7918272                                | 65814927.92                 | 101.0536514                                      | -1.663003634                |
| 0.045305413                     | 128.615652                                 | 28321272.68                 | 86.75208372                                      | -17.05545235                |
| 0.028907103                     | 200.416869                                 | 121664558.3                 | 137.9120934                                      | 24.45532039                 |
| 0.071651722                     | 88.50250551                                | 34415370.47                 | 52.7056042                                       | -10.77593238                |
| 0.036004879                     | 179.119133                                 | 286526482.6                 | 104.2262246                                      | -7.529551563                |
| 0.041410578                     | 144.3857868                                | 19803143.22                 | 100.7888609                                      | -46.53382387                |
| 0.048785921                     | 134.8903138                                | 4104548.571                 | 92.97203025                                      | -26.824856649               |
| 0.047905137                     | 124.1852384                                | 12354809.27                 | 85.40577943                                      | -0.307081386                |
| 0.051967045                     | 110.8624557                                | 71266726.95                 | 73.92994008                                      | -7.181796318                |
| 0.036461387                     | 158.2803397                                | 30988360.41                 | 117.1998486                                      | -23.64106777                |
| 0.043456933                     | 136.4942433                                | 126905135.9                 | 87.75486682                                      | 0.285146288                 |
| 0.052476373                     | 109.6724583                                | 11519358.72                 | 77.2480746                                       | -34.38301043                |
| 0.105384128                     | 87.85883211                                | 124146410.4                 | 41.9286507                                       | 1.738287275                 |
| 0.040516877                     | 144.6717184                                | 31450106.75                 | 95.9818757                                       | -9.100317935                |
| 0.027263092                     | 213.3472624                                | 163541403.6                 | 145.1922129                                      | -8.4921045                  |
| 0.046167447                     | 128.6002847                                | 37873841.59                 | 83.73067438                                      | 2.148130966                 |
| 0.058965041                     | 110.0629297                                | 18996505.55                 | 67.18454883                                      | -12.15507257                |
| 0.055683035                     | 143.4398829                                | 49715203.2                  | 69.12264762                                      | -17.31860994                |
| 0.041213444                     | 141.3272535                                | 72979907.94                 | 92.93920272                                      | -12.77637843                |
| 0.037420951                     | 157.2764639                                | 236914983.2                 | 101.9912998                                      | -7.688329331                |
| 0.06853154                      | 97.10092913                                | 60272643.65                 | 56.59645813                                      | 3.761212609                 |
| 0.094899                        | 76.60299383                                | 341011269.44                | 43.34621761                                      | 3.653054057                 |
| 0.043895602                     | 136.9982079                                | 5790838.184                 | 102.2998908                                      | 3.048168844                 |
| 0.033915206                     | 183.9106828                                | 98766546.43                 | 114.5444236                                      | 2.261709302                 |
| 0.031745214                     | 186.5053985                                | 20813281.97                 | 134.8050008                                      | -22.46695076                |
| 0.047437243                     | 125.7383692                                | 89624470.9                  | 81.09242262                                      | -8.730352643                |
| 0.044340325                     | 135.1333774                                | 12489815.59                 | 97.27628177                                      | -5.266648691                |
| 0.039320535                     | 150.7281717                                | 83853353.41                 | 97.13444334                                      | -39.77361333                |
| 0.048194252                     | 131.307232                                 | 98984887.98                 | 79.94283691                                      | 4.785602369                 |
| 0.04711052                      | 122.0235497                                | 27308854.89                 | 83.82846911                                      | -7.147234422                |
| 0.068456293                     | 116.0603381                                | 164227976.8                 | 59.4511676                                       | -2.99730432                 |
| 0.075467819                     | 93.41631565                                | 125087052.1                 | 52.42394205                                      | -6.873999375                |
| 0.060960386                     | 101.0149953                                | 180179353.8                 | 61.39482271                                      | -0.6715739                  |
| 0.049116147                     | 119.7298919                                | 26961509.74                 | 79.32991525                                      | -1.917799328                |
| 0.046985266                     | 123.9862777                                | 28853546.45                 | 83.65331506                                      | -8.180382098                |
| 0.03011556                      | 195.7760868                                | 39319948.74                 | 133.5038957                                      | -46.3666054                 |
| 0.035039413                     | 163.4346297                                | 78057202.97                 | 111.0835812                                      | -36.75837256                |
| 0.039910288                     | 145.1694754                                | 102852323.4                 | 96.07162865                                      | -22.43045365                |
| 0.048603238                     | 123.3500593                                | 13913694.34                 | 79.45486391                                      | -12.62266962                |
| 0.038110284                     | 151.7987828                                | 51253112.56                 | 102.2208933                                      | 6.873941368                 |
| 0.034177675                     | 169.7959243                                | 138690762.6                 | 112.662559                                       | -15.91211883                |
| 0.047705113                     | 143.7825039                                | 4893055.58                  | 96.8666513                                       | 31.62843049                 |
| 0.04528745                      | 140.1974518                                | 124395533.9                 | 85.59407354                                      | -6.140920912                |
| 0.041537387                     | 140.6794026                                | 189019537.4                 | 92.23606773                                      | -2.64508588                 |
| 0.03949551                      | 150.5300033                                | 31208011.61                 | 99.52013309                                      | -24.85959702                |
| 0.034957388                     | 164.977221                                 | 68440327.59                 | 113.0239264                                      | 1.605072645                 |
| 0.085012989                     | 75.01028112                                | 2014138.754                 | 44.2731556                                       | 6.343989008                 |
| 0.0430839                       | 187.6246521                                | 6327335.31                  | 119.079108                                       | 38.91649915                 |
| 0.061707369                     | 103.9031691                                | 83981039.7                  | 62.37302818                                      | 3.956907291                 |
| 0.030282724                     | 197.1065261                                | 42953335.34                 | 137.0283522                                      | -32.76081314                |
| 0.038453437                     | 149.3230705                                | 37362965.3                  | 101.6249956                                      | -1.95027033                 |
| 0.040945116                     | 151.3407213                                | 175623570.8                 | 94.54105229                                      | -13.72455256                |
| 0.065447043                     | 93.0146539                                 | 94749022.13                 | 57.53229875                                      | -10.42314625                |
| 0.020950179                     | 336.8255922                                | 14899731.42                 | 251.8586401                                      | -112.9150381                |
| 0.031059286                     | 193.4099101                                | 80213668.59                 | 126.9116076                                      | -23.89901443                |
| 0.040782603                     | 158.3095725                                | 4747306.204                 | 109.9724446                                      | 1.424358257                 |
| 0.040371482                     | 164.4206595                                | 20572198.6                  | 99.77653608                                      | 25.98571125                 |
| 0.041325207                     | 157.6513996                                | 40521609.34                 | 92.28785315                                      | -13.02177673                |





| wavelet.LHL_glrIm_ShortRunLowGrayLevelEmphasis | wavelet.LHL_glrIm_GrayLevelVariance | wavelet.LHL_glrIm_LowGrayLevelRunEmphasis | wavelet.LHL_glrIm_GrayLevelNonUniformityNormalized | wavelet.LHL_glrIm_RunVariance |
|------------------------------------------------|-------------------------------------|-------------------------------------------|----------------------------------------------------|-------------------------------|
| 0.003379161                                    | 77.12315211                         | 0.003418801                               | 0.037516069                                        | 0.045107125                   |
| 0.00346792                                     | 35.36409666                         | 0.003614199                               | 0.057469564                                        | 0.105183499                   |
| 0.006239066                                    | 58.62759829                         | 0.006336249                               | 0.042048463                                        | 0.036633179                   |
| 0.001231843                                    | 101.1504192                         | 0.001251869                               | 0.033164357                                        | 0.044442132                   |
| 0.005557612                                    | 42.17528297                         | 0.005613476                               | 0.049907774                                        | 0.044005771                   |
| 0.007055628                                    | 41.77339364                         | 0.007186763                               | 0.044691504                                        | 0.04658565                    |
| 0.004529584                                    | 46.1554973                          | 0.004559807                               | 0.046126842                                        | 0.037719402                   |
| 0.001977298                                    | 98.13413949                         | 0.001994989                               | 0.028990629                                        | 0.030655833                   |
| 0.001705136                                    | 78.23693757                         | 0.001751122                               | 0.036420644                                        | 0.041841539                   |
| 0.001344227                                    | 55.10923412                         | 0.001375212                               | 0.04343337                                         | 0.050739263                   |
| 0.003266549                                    | 48.91030221                         | 0.003232183                               | 0.042274332                                        | 0.046593313                   |
| 0.001660995                                    | 84.67298713                         | 0.001691402                               | 0.033503195                                        | 0.049632959                   |
| 0.000914854                                    | 128.8382056                         | 0.000927912                               | 0.032788327                                        | 0.047795087                   |
| 0.005993544                                    | 28.18387107                         | 0.006155201                               | 0.054176083                                        | 0.064489143                   |
| 0.001451693                                    | 78.86729683                         | 0.00146071                                | 0.035180724                                        | 0.042915583                   |
| 0.000946406                                    | 37.74604815                         | 0.000996114                               | 0.089558059                                        | 0.179933679                   |
| 0.00373469                                     | 61.21041945                         | 0.003777216                               | 0.038273987                                        | 0.045691957                   |
| 0.001234184                                    | 86.83468076                         | 0.001260357                               | 0.035705793                                        | 0.05874205                    |
| 0.007126707                                    | 52.26335119                         | 0.007250954                               | 0.0396986                                          | 0.040560605                   |
| 0.001914565                                    | 34.27985574                         | 0.001993308                               | 0.05747452                                         | 0.11456548                    |
| 0.001884018                                    | 43.47454372                         | 0.001957102                               | 0.054507861                                        | 0.100027085                   |
| 0.001695718                                    | 119.7674723                         | 0.001717413                               | 0.03147061                                         | 0.041037846                   |
| 0.001823133                                    | 43.33860953                         | 0.001876737                               | 0.04982566                                         | 0.077921488                   |
| 0.002708101                                    | 121.9127285                         | 0.002718139                               | 0.029023608                                        | 0.029761774                   |
| 0.004276704                                    | 40.46206718                         | 0.004218121                               | 0.050171023                                        | 0.062971821                   |
| 0.003863351                                    | 58.68776919                         | 0.003913689                               | 0.040124078                                        | 0.044046004                   |
| 0.002783251                                    | 29.21735871                         | 0.002891485                               | 0.059615503                                        | 0.080870424                   |
| 0.002779821                                    | 39.2596545                          | 0.0028424                                 | 0.048784642                                        | 0.058331575                   |
| 0.002900128                                    | 69.25369325                         | 0.002959913                               | 0.036722865                                        | 0.045079876                   |
| 0.004613637                                    | 32.62908948                         | 0.004830071                               | 0.071212517                                        | 0.17344313                    |
| 0.002494008                                    | 45.83989301                         | 0.002553328                               | 0.044340393                                        | 0.051766864                   |
| 0.002839381                                    | 24.45778914                         | 0.002998963                               | 0.071069753                                        | 0.120212461                   |
| 0.003314863                                    | 52.58334181                         | 0.003384476                               | 0.04049652                                         | 0.050106804                   |
| 0.020312595                                    | 102.1843114                         | 0.020939056                               | 0.047860308                                        | 0.036885487                   |
| 0.014127022                                    | 55.17015126                         | 0.014334941                               | 0.038800107                                        | 0.035619324                   |
| 0.002458691                                    | 42.35965675                         | 0.00252524                                | 0.050219498                                        | 0.062396287                   |
| 0.002338531                                    | 53.45138576                         | 0.002399545                               | 0.041074914                                        | 0.053691729                   |
| 0.001302495                                    | 36.90661744                         | 0.001342291                               | 0.054070093                                        | 0.074416614                   |
| 0.006057928                                    | 24.34337204                         | 0.00618727                                | 0.061621797                                        | 0.060744955                   |
| 0.00300928                                     | 51.21371226                         | 0.003066009                               | 0.043713228                                        | 0.049633945                   |
| 0.00272182                                     | 50.07157611                         | 0.002762409                               | 0.046018898                                        | 0.051641851                   |
| 0.004595967                                    | 38.09746311                         | 0.004690352                               | 0.046502455                                        | 0.050840774                   |
| 0.006616903                                    | 65.21667767                         | 0.006742148                               | 0.037326626                                        | 0.043085891                   |
| 0.003723626                                    | 44.63681005                         | 0.003804762                               | 0.044683035                                        | 0.053936534                   |
| 0.001625784                                    | 104.9885054                         | 0.001644833                               | 0.02869036                                         | 0.033731611                   |
| 0.005315923                                    | 25.8666817                          | 0.005489397                               | 0.068596218                                        | 0.084083629                   |
| 0.000701705                                    | 110.7726138                         | 0.000709677                               | 0.034991513                                        | 0.048288813                   |
| 0.005371845                                    | 53.74646026                         | 0.005458435                               | 0.040932924                                        | 0.042068662                   |
| 0.013501163                                    | 44.77587606                         | 0.013692275                               | 0.048331313                                        | 0.033243959                   |
| 0.004156664                                    | 39.94297888                         | 0.004212886                               | 0.047375781                                        | 0.045481331                   |
| 0.002380227                                    | 34.48557603                         | 0.002464413                               | 0.050595522                                        | 0.077109805                   |
| 0.003917051                                    | 59.13725111                         | 0.003998221                               | 0.036281588                                        | 0.050054889                   |
| 0.002167842                                    | 54.60442627                         | 0.002223862                               | 0.042421729                                        | 0.058216734                   |
| 0.010039045                                    | 30.58580375                         | 0.010227897                               | 0.051964271                                        | 0.054218073                   |
| 0.002420568                                    | 32.68373372                         | 0.002570918                               | 0.091667395                                        | 0.177774141                   |
| 0.002857235                                    | 57.87273977                         | 0.002898989                               | 0.040079052                                        | 0.040053922                   |
| 0.00161497                                     | 119.6310661                         | 0.001636041                               | 0.027046569                                        | 0.034296221                   |
| 0.002710037                                    | 48.00948494                         | 0.002763435                               | 0.045594174                                        | 0.052077879                   |
| 0.003480769                                    | 38.86318189                         | 0.003559093                               | 0.054521692                                        | 0.101752631                   |
| 0.001945707                                    | 94.57113134                         | 0.001966068                               | 0.052553339                                        | 0.072573312                   |
| 0.002585925                                    | 56.26081267                         | 0.00263929                                | 0.040494382                                        | 0.049099102                   |
| 0.000833202                                    | 70.58293117                         | 0.000851162                               | 0.036848628                                        | 0.044713879                   |
| 0.001346206                                    | 32.57866238                         | 0.001395195                               | 0.064479021                                        | 0.096551337                   |
| 0.001079758                                    | 21.524946                           | 0.001142727                               | 0.083446635                                        | 0.199422264                   |
| 0.017897957                                    | 42.62040963                         | 0.01813113                                | 0.043844667                                        | 0.037132331                   |
| 0.002056945                                    | 103.8651941                         | 0.002110855                               | 0.033148642                                        | 0.040154249                   |
| 0.004806436                                    | 83.59402215                         | 0.00485222                                | 0.031664109                                        | 0.030491065                   |
| 0.002833031                                    | 46.0762004                          | 0.002915381                               | 0.046116551                                        | 0.067839313                   |
| 0.006722168                                    | 44.65076245                         | 0.006812454                               | 0.043982388                                        | 0.038128449                   |
| 0.001692115                                    | 66.21578731                         | 0.001720351                               | 0.038748493                                        | 0.042679791                   |
| 0.00456415                                     | 53.79349534                         | 0.004557807                               | 0.046086314                                        | 0.07607843                    |
| 0.005683735                                    | 39.42445312                         | 0.005801967                               | 0.046433741                                        | 0.061726597                   |
| 0.000892538                                    | 54.22103588                         | 0.000930489                               | 0.061513571                                        | 0.117567993                   |
| 0.00175008                                     | 31.78491403                         | 0.001842543                               | 0.068789374                                        | 0.12625518                    |
| 0.001220055                                    | 32.74444845                         | 0.001269953                               | 0.058670368                                        | 0.077896424                   |
| 0.004662974                                    | 39.50081857                         | 0.004762255                               | 0.048201351                                        | 0.054777772                   |
| 0.004154867                                    | 41.92271937                         | 0.004214272                               | 0.0463308                                          | 0.049229831                   |
| 0.004409114                                    | 101.8628556                         | 0.004434046                               | 0.029780834                                        | 0.038125203                   |
| 0.003409491                                    | 70.60233959                         | 0.00346846                                | 0.034661771                                        | 0.040265448                   |
| 0.001935871                                    | 58.47446295                         | 0.001981797                               | 0.039258697                                        | 0.049097272                   |
| 0.003673969                                    | 44.98835639                         | 0.003725986                               | 0.047875847                                        | 0.052468779                   |
| 0.002866053                                    | 62.33343495                         | 0.002900484                               | 0.037663465                                        | 0.035286597                   |
| 0.001262092                                    | 80.4075206                          | 0.00127873                                | 0.033864161                                        | 0.033675348                   |
| 0.002266663                                    | 54.28394498                         | 0.002235355                               | 0.046802095                                        | 0.031377488                   |
| 0.002258983                                    | 60.18708192                         | 0.002316458                               | 0.043838018                                        | 0.058103083                   |
| 0.001423053                                    | 56.66528604                         | 0.001465309                               | 0.040868455                                        | 0.05694906                    |
| 0.002262571                                    | 64.60391314                         | 0.002289184                               | 0.038731886                                        | 0.048026563                   |
| 0.002362492                                    | 71.47959465                         | 0.002397326                               | 0.034697454                                        | 0.037536151                   |
| 0.014312111                                    | 18.37675594                         | 0.014831903                               | 0.082010663                                        | 0.089636542                   |
| 0.011085064                                    | 97.69638876                         | 0.01106777                                | 0.042633554                                        | 0.030781472                   |
| 0.001160599                                    | 35.41062829                         | 0.001207802                               | 0.058329272                                        | 0.101845871                   |
| 0.004121043                                    | 98.59310126                         | 0.0041734                                 | 0.030053033                                        | 0.034865291                   |
| 0.002280791                                    | 59.96444479                         | 0.002312753                               | 0.037958304                                        | 0.041351539                   |
| 0.001288321                                    | 70.98346475                         | 0.001326842                               | 0.039424938                                        | 0.07065392                    |
| 0.001495325                                    | 27.13847972                         | 0.001561413                               | 0.062944196                                        | 0.089185922                   |
| 0.00551856                                     | 261.6465623                         | 0.005532962                               | 0.020842295                                        | 0.18834532                    |
| 0.002376577                                    | 106.6800482                         | 0.002402555                               | 0.030438571                                        | 0.048911969                   |
| 0.022296693                                    | 61.23384873                         | 0.023024929                               | 0.040970701                                        | 0.026927571                   |
| 0.003611325                                    | 88.51947332                         | 0.003626597                               | 0.039767692                                        | 0.042398898                   |
| 0.004346402                                    | 82.73313295                         | 0.004384211                               | 0.039956805                                        | 0.059166043                   |

| wavelet.LHL_glrjm_GrayLevelNonUniformity | wavelet.LHL_glrjm_LongRunEmphasis | wavelet.LHL_glrjm_ShortRunHighGrayLevelEmphasis | wavelet.LHL_glrjm_RunLengthNonUniformity | wavelet.LHL_glrjm_ShortRunEmphasis |
|------------------------------------------|-----------------------------------|-------------------------------------------------|------------------------------------------|------------------------------------|
| 25.4060333                               | 1.132812306                       | 974.259594                                      | 624.7388631                              | 0.96921488                         |
| 109.881584                               | 1.287184756                       | 470.0821368                                     | 1643.013655                              | 0.941689562                        |
| 17.65443035                              | 1.105507458                       | 586.4976305                                     | 393.8188377                              | 0.975689947                        |
| 84.01181841                              | 1.126901672                       | 1662.333931                                     | 2349.287471                              | 0.971288232                        |
| 17.18434361                              | 1.131929786                       | 619.1357632                                     | 317.2402072                              | 0.968788551                        |
| 27.55500475                              | 1.135584417                       | 382.5220048                                     | 569.1186825                              | 0.96913995                         |
| 15.00350093                              | 1.112535637                       | 936.3219976                                     | 303.5824181                              | 0.97346717                         |
| 28.20327398                              | 1.091596243                       | 1461.819238                                     | 917.7402371                              | 0.977983911                        |
| 72.86642578                              | 1.122002222                       | 1896.309144                                     | 1857.564877                              | 0.971779045                        |
| 128.3920782                              | 1.149610301                       | 1221.47419                                      | 2698.188195                              | 0.965298093                        |
| 33.45995182                              | 1.139172731                       | 704.3638209                                     | 726.295426                               | 0.967234257                        |
| 47.50882365                              | 1.142644544                       | 1316.510691                                     | 1303.550199                              | 0.967812168                        |
| 65.12394439                              | 1.138729508                       | 2805.006948                                     | 1827.389448                              | 0.968251925                        |
| 57.22497081                              | 1.185469536                       | 332.8856086                                     | 948.1546532                              | 0.958697254                        |
| 30.85108105                              | 1.123435784                       | 3355.63476                                      | 815.4692694                              | 0.972020387                        |
| 553.4099136                              | 1.455175634                       | 1934.749873                                     | 5029.695932                              | 0.919916604                        |
| 25.62404347                              | 1.133917528                       | 860.3613675                                     | 617.8674374                              | 0.969200824                        |
| 79.18811698                              | 1.165196773                       | 1593.275247                                     | 2017.219457                              | 0.963749149                        |
| 22.25501681                              | 1.119158181                       | 458.6714587                                     | 521.3794794                              | 0.972234116                        |
| 148.2840851                              | 1.296361871                       | 759.6407546                                     | 2227.810389                              | 0.943281717                        |
| 264.4175294                              | 1.262417402                       | 781.8956141                                     | 4248.375966                              | 0.948832004                        |
| 52.12533123                              | 1.120667062                       | 1592.026415                                     | 1540.034546                              | 0.972019995                        |
| 128.245109                               | 1.206179831                       | 843.2813078                                     | 2311.307081                              | 0.958554589                        |
| 13.56801694                              | 1.088929446                       | 2361.60892                                      | 441.9958702                              | 0.978684417                        |
| 57.19216742                              | 1.179016917                       | 513.352638                                      | 1027.246375                              | 0.96036004                         |
| 26.69619084                              | 1.132759662                       | 777.1080833                                     | 612.2254716                              | 0.968368754                        |
| 192.8424933                              | 1.229814585                       | 516.8888426                                     | 2840.741351                              | 0.950267913                        |
| 66.32308657                              | 1.170067167                       | 694.314548                                      | 1228.403313                              | 0.961362804                        |
| 62.29106487                              | 1.129259156                       | 708.447291                                      | 1572.543342                              | 0.970882979                        |
| 160.8566777                              | 1.444209531                       | 396.4901621                                     | 1838.4135                                | 0.920373667                        |
| 134.4892775                              | 1.151027395                       | 737.2813982                                     | 2770.60124                               | 0.965456569                        |
| 384.1210737                              | 1.326626141                       | 457.8199424                                     | 4558.65669                               | 0.934506063                        |
| 78.66698421                              | 1.145936806                       | 622.8562838                                     | 1779.579242                              | 0.966592928                        |
| 4.794513267                              | 1.116256144                       | 1129.59088                                      | 92.82965678                              | 0.970935964                        |
| 12.42224214                              | 1.111345517                       | 368.0572809                                     | 297.4137053                              | 0.972163621                        |
| 95.9888217                               | 1.180171179                       | 700.1493912                                     | 1720.784739                              | 0.959769524                        |
| 112.7174054                              | 1.155748774                       | 745.4066884                                     | 2501.170646                              | 0.964632102                        |
| 170.7551789                              | 1.203758233                       | 1113.15838                                      | 2824.545295                              | 0.957218419                        |
| 48.68241647                              | 1.178466049                       | 360.218749                                      | 709.9779318                              | 0.959306672                        |
| 43.83592958                              | 1.144706433                       | 709.6702481                                     | 919.7013321                              | 0.966907113                        |
| 64.65593463                              | 1.152817444                       | 950.4810235                                     | 1279.957189                              | 0.964527963                        |
| 42.27023496                              | 1.150901979                       | 461.8506386                                     | 829.2005905                              | 0.964912072                        |
| 58.90525163                              | 1.126866616                       | 583.8242966                                     | 1461.755083                              | 0.97057905                         |
| 43.73074467                              | 1.151394591                       | 544.1238232                                     | 897.3938688                              | 0.966840938                        |
| 52.20399692                              | 1.099338772                       | 1489.476155                                     | 1710.721812                              | 0.97658949                         |
| 142.4527469                              | 1.23655998                        | 341.8530207                                     | 1819.531488                              | 0.949315781                        |
| 143.0400431                              | 1.137825403                       | 4003.747416                                     | 3768.460128                              | 0.969010006                        |
| 22.95682654                              | 1.123028496                       | 490.0255634                                     | 520.3242862                              | 0.971472471                        |
| 6.268699437                              | 1.102666615                       | 378.6771054                                     | 121.6615349                              | 0.975001081                        |
| 22.58765847                              | 1.132748323                       | 636.4514339                                     | 440.0884062                              | 0.969434744                        |
| 162.7763744                              | 1.211561557                       | 602.5681445                                     | 2866.604626                              | 0.955657092                        |
| 28.67110162                              | 1.14584686                        | 629.8317874                                     | 724.0282466                              | 0.96666349                         |
| 153.9449437                              | 1.167474853                       | 790.036086                                      | 3288.75417                               | 0.962449887                        |
| 29.19214578                              | 1.161839998                       | 287.7055288                                     | 508.8796918                              | 0.9622144                          |
| 532.9585514                              | 1.447061823                       | 571.157589                                      | 4747.610296                              | 0.921354845                        |
| 33.90114296                              | 1.120518402                       | 915.7837035                                     | 783.9784662                              | 0.971164478                        |
| 57.390128                                | 1.103573246                       | 1555.316459                                     | 1989.166499                              | 0.975179246                        |
| 56.20067824                              | 1.1530598                         | 764.5517901                                     | 1123.744826                              | 0.964736878                        |
| 41.17793035                              | 1.26494347                        | 658.2577467                                     | 661.2941406                              | 0.948878012                        |
| 43.57148316                              | 1.203110627                       | 684.810883                                      | 740.6307264                              | 0.956623776                        |
| 82.03991315                              | 1.143776751                       | 764.8199355                                     | 1857.545417                              | 0.966899792                        |
| 193.84448                                | 1.12958869                        | 1813.251882                                     | 4865.354192                              | 0.970267695                        |
| 185.195499                               | 1.256739265                       | 1072.300515                                     | 2514.450656                              | 0.948706492                        |
| 199.7697249                              | 1.508890841                       | 1338.603871                                     | 1899.886965                              | 0.910443919                        |
| 9.159522538                              | 1.11679039                        | 272.811339                                      | 193.511061                               | 0.970802403                        |
| 49.67629243                              | 1.11495432                        | 1958.381695                                     | 1399.887344                              | 0.973964006                        |
| 12.11989291                              | 1.090468284                       | 820.2272235                                     | 361.7699876                              | 0.978507595                        |
| 139.2944416                              | 1.189130647                       | 605.9706786                                     | 2716.6474                                | 0.959324736                        |
| 18.9012844                               | 1.115676286                       | 460.3249937                                     | 399.362276                               | 0.972087463                        |
| 74.98836309                              | 1.123155645                       | 1130.532592                                     | 1798.173015                              | 0.971950836                        |
| 131.6138595                              | 1.211449144                       | 606.3139073                                     | 2543.553583                              | 0.955218962                        |
| 49.70246715                              | 1.175330746                       | 434.9377747                                     | 968.2225701                              | 0.96146831                         |
| 291.951362                               | 1.307727376                       | 1574.791536                                     | 4073.009542                              | 0.940820407                        |
| 420.7988038                              | 1.334884161                       | 171.0322477                                     | 5172.863474                              | 0.935285446                        |
| 504.4536499                              | 1.218761573                       | 974.5329279                                     | 7602.601956                              | 0.952952207                        |
| 51.16054661                              | 1.160689498                       | 468.9759941                                     | 962.69336                                | 0.96296263                         |
| 49.52888115                              | 1.141502059                       | 646.1080675                                     | 982.8426111                              | 0.967965694                        |
| 17.51599331                              | 1.113998971                       | 1415.891036                                     | 547.3825405                              | 0.972816243                        |
| 58.92235703                              | 1.117412825                       | 694.9255127                                     | 1582.545803                              | 0.972800326                        |
| 106.8924856                              | 1.142402999                       | 861.4197664                                     | 2501.295692                              | 0.9675557                          |
| 22.99847796                              | 1.153663226                       | 797.2056917                                     | 437.9107751                              | 0.964695396                        |
| 48.80568011                              | 1.106593562                       | 911.7540188                                     | 1210.939047                              | 0.974279674                        |
| 91.61572002                              | 1.09890994                        | 1548.181925                                     | 2543.940012                              | 0.976707312                        |
| 6.590568573                              | 1.094377792                       | 377.4054531                                     | 132.9816156                              | 0.977686021                        |
| 141.3556214                              | 1.165192748                       | 801.5295158                                     | 2932.706423                              | 0.963563584                        |
| 212.5932598                              | 1.165653323                       | 1027.123446                                     | 4712.980295                              | 0.962394847                        |
| 28.83587249                              | 1.141353399                       | 1345.188993                                     | 683.8911653                              | 0.967421052                        |
| 51.98244163                              | 1.11110753                        | 954.0610391                                     | 1398.228881                              | 0.973780546                        |
| 13.90012943                              | 1.260690329                       | 332.4155734                                     | 146.3929881                              | 0.943229552                        |
| 4.345379687                              | 1.092790516                       | 1268.864814                                     | 96.14423179                              | 0.977648609                        |
| 214.3936993                              | 1.273720678                       | 1176.515949                                     | 3184.786973                              | 0.944882577                        |
| 20.5050893                               | 1.105779354                       | 819.6457366                                     | 637.5119003                              | 0.974300681                        |
| 37.32844198                              | 1.121816758                       | 1027.356242                                     | 912.2247337                              | 0.971486327                        |
| 152.0454812                              | 1.196888353                       | 1265.297587                                     | 3454.388475                              | 0.957765966                        |
| 339.4210885                              | 1.249588804                       | 832.8943715                                     | 4696.491279                              | 0.947068964                        |
| 5.173847899                              | 1.058098894                       | 1776.607594                                     | 238.9531929                              | 0.985475276                        |
| 35.49307494                              | 1.137069692                       | 1452.533003                                     | 1076.955712                              | 0.969676407                        |
| 4.910218315                              | 1.081895679                       | 408.3544733                                     | 113.9516608                              | 0.980282453                        |
| 14.51597365                              | 1.121298228                       | 1972.03388                                      | 339.8476313                              | 0.972643632                        |
| 30.6799274                               | 1.164844304                       | 1335.394999                                     | 699.9729604                              | 0.964483942                        |



| wavelet.LHL_glrIm_LongRunHighGrayLevelEmphasis | wavelet.LHL_glrIm_RunPercentage | wavelet.LHL_glrIm_LongRunLowGrayLevelEmphasis | wavelet.LHL_glrIm_RunEntropy | wavelet.LHL_glrIm_HighGrayLevelRunEmphasis |
|------------------------------------------------|---------------------------------|-----------------------------------------------|------------------------------|--------------------------------------------|
| 1137.162268                                    | 0.0959141425                    | 0.003587773                                   | 5.270947883                  | 1004.932012                                |
| 629.5096846                                    | 0.920336284                     | 0.004324409                                   | 4.920092081                  | 497.1346976                                |
| 656.0828755                                    | 0.967387451                     | 0.00674309                                    | 5.037809269                  | 599.5823082                                |
| 1911.328539                                    | 0.961348708                     | 0.001340116                                   | 5.511645636                  | 1708.343227                                |
| 727.2214823                                    | 0.959074352                     | 0.005847003                                   | 4.814028367                  | 639.6935568                                |
| 438.9435728                                    | 0.958846752                     | 0.007756214                                   | 4.905511257                  | 392.9997868                                |
| 1072.616493                                    | 0.965076467                     | 0.004687794                                   | 4.843154305                  | 962.3117177                                |
| 1637.578283                                    | 0.970904345                     | 0.002068731                                   | 5.451627121                  | 1495.984723                                |
| 2181.048424                                    | 0.962333962                     | 0.001940533                                   | 5.327189188                  | 1950.064975                                |
| 1450.762791                                    | 0.954163977                     | 0.001508688                                   | 5.139207318                  | 1264.640024                                |
| 826.247053                                     | 0.957027253                     | 0.003567053                                   | 5.034397888                  | 727.7820427                                |
| 1536.321902                                    | 0.956815115                     | 0.001827512                                   | 5.40923622                   | 1357.493694                                |
| 3256.488249                                    | 0.957644092                     | 0.000984976                                   | 5.57232123                   | 2889.268714                                |
| 410.2849654                                    | 0.944819045                     | 0.006876496                                   | 4.73151567                   | 347.0617579                                |
| 3850.365179                                    | 0.962593937                     | 0.00150026                                    | 5.274859487                  | 3446.780441                                |
| 3037.029711                                    | 0.887987067                     | 0.001260498                                   | 4.76232145                   | 2099.592831                                |
| 1009.631064                                    | 0.959113952                     | 0.00396158                                    | 5.135314091                  | 888.5191218                                |
| 1902.838143                                    | 0.950949993                     | 0.001379155                                   | 5.437738056                  | 1649.094277                                |
| 527.688324                                     | 0.963256675                     | 0.007766202                                   | 5.026302803                  | 471.5567471                                |
| 1029.895753                                    | 0.920742592                     | 0.002401806                                   | 4.902338077                  | 803.2220385                                |
| 1029.113188                                    | 0.928260101                     | 0.002324542                                   | 5.014199563                  | 822.292147                                 |
| 1821.089374                                    | 0.962924866                     | 0.001810622                                   | 5.587453946                  | 1635.250089                                |
| 1053.873079                                    | 0.942145734                     | 0.002140271                                   | 4.99987933                   | 878.5220433                                |
| 2619.87142                                     | 0.97185351                      | 0.002759821                                   | 5.509968777                  | 2411.460033                                |
| 620.7024979                                    | 0.946779964                     | 0.0050493                                     | 4.908713066                  | 532.9283563                                |
| 903.1898727                                    | 0.958656617                     | 0.004123091                                   | 5.129782214                  | 801.2990101                                |
| 662.7780472                                    | 0.933263793                     | 0.003387699                                   | 4.77327207                   | 542.9199814                                |
| 840.4728229                                    | 0.948682162                     | 0.003115452                                   | 4.925945398                  | 721.3214332                                |
| 807.0585949                                    | 0.960993681                     | 0.003234501                                   | 5.264569379                  | 726.7246512                                |
| 612.0078715                                    | 0.888095382                     | 0.006005092                                   | 4.841657587                  | 429.2071658                                |
| 873.9992316                                    | 0.954073608                     | 0.002810269                                   | 5.041912892                  | 762.7578759                                |
| 634.957223                                     | 0.911181736                     | 0.003786918                                   | 4.689182407                  | 487.462873                                 |
| 733.7118172                                    | 0.955503424                     | 0.003685676                                   | 5.128121974                  | 643.4171761                                |
| 1277.488985                                    | 0.963017751                     | 0.023444898                                   | 4.832083464                  | 1159.170501                                |
| 421.2940078                                    | 0.964318814                     | 0.015166617                                   | 5.006701653                  | 378.7046263                                |
| 854.8197653                                    | 0.946230008                     | 0.002821871                                   | 4.96760881                   | 728.4371226                                |
| 887.280863                                     | 0.952831197                     | 0.002664062                                   | 5.153886758                  | 771.6154198                                |
| 1393.21961                                     | 0.941424705                     | 0.001531347                                   | 4.894099009                  | 1161.966181                                |
| 442.2977511                                    | 0.946107784                     | 0.006747649                                   | 4.567240451                  | 375.3332287                                |
| 834.1471748                                    | 0.955928723                     | 0.003312746                                   | 5.063950089                  | 732.852932                                 |
| 1130.131393                                    | 0.953188602                     | 0.002936563                                   | 5.041301873                  | 984.2930432                                |
| 555.2006876                                    | 0.95383001                      | 0.005093806                                   | 4.877036067                  | 479.4431478                                |
| 673.0108828                                    | 0.96106999                      | 0.007262747                                   | 5.242073468                  | 600.7086375                                |
| 641.9847427                                    | 0.954821764                     | 0.00417129                                    | 4.982572155                  | 561.8168564                                |
| 1688.262624                                    | 0.96887032                      | 0.001724544                                   | 5.531300692                  | 1527.145678                                |
| 437.8982395                                    | 0.931984533                     | 0.006292647                                   | 4.641151934                  | 358.8832433                                |
| 4682.344033                                    | 0.958220635                     | 0.000745189                                   | 5.525968614                  | 4128.599438                                |
| 558.5651164                                    | 0.962000264                     | 0.005830278                                   | 5.031164608                  | 502.8493597                                |
| 432.0799963                                    | 0.967853042                     | 0.014461775                                   | 4.673865343                  | 389.0750981                                |
| 743.9669548                                    | 0.959294227                     | 0.004457411                                   | 4.832899379                  | 656.6043081                                |
| 757.2167804                                    | 0.939476995                     | 0.002862016                                   | 4.906056244                  | 629.4604785                                |
| 747.5830465                                    | 0.95553902                      | 0.004347178                                   | 5.153855261                  | 651.5847404                                |
| 951.7597861                                    | 0.949711111                     | 0.002472319                                   | 5.17298381                   | 819.7944714                                |
| 343.5017679                                    | 0.950540154                     | 0.011034682                                   | 4.71343852                   | 298.3244584                                |
| 870.1137023                                    | 0.88966851                      | 0.003424918                                   | 4.711002597                  | 616.3558506                                |
| 1050.947262                                    | 0.962282314                     | 0.003072933                                   | 5.109668563                  | 941.9567335                                |
| 1759.21953                                     | 0.967554106                     | 0.001723618                                   | 5.636052966                  | 1594.66749                                 |
| 914.5423958                                    | 0.953298828                     | 0.00299273                                    | 5.009462363                  | 792.5302193                                |
| 878.743616                                     | 0.927612928                     | 0.003961821                                   | 4.910930722                  | 694.0739958                                |
| 2959.239226                                    | 0.940976163                     | 0.002060619                                   | 5.13810083                   | 2479.638726                                |
| 897.9013002                                    | 0.956075072                     | 0.002869825                                   | 5.163650828                  | 789.7920251                                |
| 2100.466335                                    | 0.960288707                     | 0.000929344                                   | 5.31448489                   | 1866.933488                                |
| 1405.740698                                    | 0.92922579                      | 0.001640697                                   | 4.776415678                  | 1128.153571                                |
| 2203.118981                                    | 0.875756978                     | 0.001501442                                   | 4.648884799                  | 1468.577865                                |
| 313.4203735                                    | 0.962779156                     | 0.019063821                                   | 4.795481071                  | 280.9331459                                |
| 2232.849749                                    | 0.964881866                     | 0.002332274                                   | 5.485466699                  | 2009.101862                                |
| 905.0781702                                    | 0.97149551                      | 0.005042856                                   | 5.284937321                  | 836.5290125                                |
| 744.5542403                                    | 0.944755901                     | 0.003295981                                   | 5.065135223                  | 630.6588911                                |
| 528.0732884                                    | 0.963608141                     | 0.007184673                                   | 4.889696104                  | 473.4842798                                |
| 1300.342857                                    | 0.962284359                     | 0.001844224                                   | 5.223398763                  | 1162.132451                                |
| 759.1001814                                    | 0.939321862                     | 0.005031542                                   | 5.151274721                  | 633.1497904                                |
| 525.229161                                     | 0.948082033                     | 0.00633974                                    | 4.946670464                  | 451.3595364                                |
| 2175.305072                                    | 0.917748273                     | 0.001126615                                   | 5.072758586                  | 1671.796564                                |
| 1017.537553                                    | 0.910477849                     | 0.002315417                                   | 4.827143008                  | 765.694211                                 |
| 1240.282948                                    | 0.936551031                     | 0.001500832                                   | 4.832419625                  | 1021.603138                                |
| 561.9892066                                    | 0.951061483                     | 0.005188108                                   | 4.921731442                  | 486.3460881                                |
| 757.1566456                                    | 0.957027753                     | 0.0044717                                     | 4.933105675                  | 666.6282377                                |
| 1607.282506                                    | 0.964186633                     | 0.004537885                                   | 5.475078615                  | 1452.773937                                |
| 788.0680337                                    | 0.963675214                     | 0.003719611                                   | 5.29372402                   | 712.4817805                                |
| 1010.79489                                     | 0.956700362                     | 0.002182147                                   | 5.198327044                  | 889.1440925                                |
| 940.898247                                     | 0.953144078                     | 0.003954912                                   | 4.921374089                  | 824.3025283                                |
| 1032.219574                                    | 0.966328228                     | 0.003043385                                   | 5.185924863                  | 935.2684626                                |
| 1740.967326                                    | 0.968977298                     | 0.001349703                                   | 5.36054556                   | 1585.086057                                |
| 423.3970037                                    | 0.970822281                     | 0.022715309                                   | 4.805267329                  | 386.2339638                                |
| 956.7241409                                    | 0.950865413                     | 0.002576096                                   | 5.184439181                  | 829.7783563                                |
| 1234.01634                                     | 0.949935382                     | 0.001650741                                   | 5.207495355                  | 1065.358831                                |
| 1578.200542                                    | 0.956891438                     | 0.002404374                                   | 5.195155245                  | 1388.926739                                |
| 1089.566729                                    | 0.965305313                     | 0.002543363                                   | 5.292477417                  | 979.8884195                                |
| 441.3768289                                    | 0.925598991                     | 0.017024941                                   | 4.258264601                  | 352.0086905                                |
| 1426.446324                                    | 0.970695971                     | 0.011196099                                   | 4.907819775                  | 1299.454315                                |
| 1578.99294                                     | 0.924412192                     | 0.001441823                                   | 4.907615762                  | 1244.249787                                |
| 920.6704839                                    | 0.966441491                     | 0.004387284                                   | 5.450875439                  | 839.3747904                                |
| 1181.751332                                    | 0.962215866                     | 0.002449518                                   | 5.170172471                  | 1056.734933                                |
| 1559.391207                                    | 0.942787286                     | 0.001504437                                   | 5.347211947                  | 1317.240809                                |
| 1090.968398                                    | 0.928707703                     | 0.001871275                                   | 4.740540592                  | 878.0453822                                |
| 1895.492688                                    | 0.981149285                     | 0.005590568                                   | 5.851083468                  | 1800.384613                                |
| 1696.719394                                    | 0.958881579                     | 0.002517465                                   | 5.554619391                  | 1496.668851                                |
| 446.3345579                                    | 0.974358974                     | 0.026058892                                   | 4.848215723                  | 415.9353628                                |
| 2262.993932                                    | 0.963060686                     | 0.003693722                                   | 5.17687955                   | 2025.375407                                |
| 1603.673917                                    | 0.951386903                     | 0.004552793                                   | 5.2884995                    | 1383.004467                                |

| wavelet.LHL_glrjm_RunLengthNonUniformityNormalized | wavelet.LHL_glszm_GrayLevelVariance | wavelet.LHL_glszm_SmallAreaHighGrayLevelEmphasis | wavelet.LHL_glszm_GrayLevelNonUniformityNormalized |
|----------------------------------------------------|-------------------------------------|--------------------------------------------------|----------------------------------------------------|
| 0.922221937                                        | 99.95521784                         | 772.3520453                                      | 0.03078702                                         |
| 0.85894528                                         | 52.93923202                         | 374.6067232                                      | 0.039277988                                        |
| 0.937845809                                        | 71.58959184                         | 496.9175678                                      | 0.035280612                                        |
| 0.927190174                                        | 130.1161113                         | 1378.011966                                      | 0.026494582                                        |
| 0.92099622                                         | 53.88027725                         | 431.2024543                                      | 0.043618287                                        |
| 0.922434973                                        | 53.45872233                         | 325.3773568                                      | 0.039021803                                        |
| 0.932799895                                        | 56.66831383                         | 683.0541061                                      | 0.040857124                                        |
| 0.943297626                                        | 108.7695899                         | 1097.2969                                        | 0.027567913                                        |
| 0.928273255                                        | 97.51256929                         | 1495.778833                                      | 0.030894432                                        |
| 0.912535043                                        | 73.33738077                         | 917.4154141                                      | 0.034805035                                        |
| 0.917265169                                        | 59.33835066                         | 526.1249615                                      | 0.038345936                                        |
| 0.91891892                                         | 100.1744798                         | 1017.682986                                      | 0.028848408                                        |
| 0.919793847                                        | 169.5775826                         | 2249.255328                                      | 0.026818772                                        |
| 0.897240366                                        | 36.81720595                         | 238.0582592                                      | 0.046203219                                        |
| 0.929299444                                        | 96.24050349                         | 2719.935914                                      | 0.030618849                                        |
| 0.813300497                                        | 77.28909523                         | 1596.309919                                      | 0.037786163                                        |
| 0.922362931                                        | 73.87018743                         | 659.4228996                                      | 0.033986246                                        |
| 0.909262969                                        | 119.4459981                         | 1293.850434                                      | 0.028345174                                        |
| 0.929559814                                        | 57.60363958                         | 343.9453712                                      | 0.037507812                                        |
| 0.862960896                                        | 53.99259209                         | 589.1022959                                      | 0.039873709                                        |
| 0.875410685                                        | 67.33050634                         | 653.2137291                                      | 0.035320713                                        |
| 0.929246728                                        | 151.1851362                         | 1266.470583                                      | 0.026292487                                        |
| 0.897636489                                        | 61.88033529                         | 675.1520675                                      | 0.03575458                                         |
| 0.945279277                                        | 149.8161999                         | 1979.44831                                       | 0.025404281                                        |
| 0.900956568                                        | 55.28501873                         | 422.2634526                                      | 0.040119834                                        |
| 0.919891594                                        | 75.64690748                         | 634.354106                                       | 0.034403292                                        |
| 0.87782773                                         | 44.31498205                         | 396.4622922                                      | 0.042866892                                        |
| 0.903297455                                        | 53.98027048                         | 544.1737671                                      | 0.039776997                                        |
| 0.926507783                                        | 85.986671                           | 595.5935004                                      | 0.030606666                                        |
| 0.813491877                                        | 58.40363112                         | 322.6072319                                      | 0.039681577                                        |
| 0.913137302                                        | 57.69945854                         | 551.9083293                                      | 0.037929205                                        |
| 0.842937822                                        | 42.07981113                         | 379.2803039                                      | 0.045447523                                        |
| 0.915830456                                        | 67.04587959                         | 500.3815743                                      | 0.034688602                                        |
| 0.926229025                                        | 112.1055621                         | 995.5961026                                      | 0.039526627                                        |
| 0.928761353                                        | 60.7991285                          | 293.0734243                                      | 0.037443004                                        |
| 0.899853118                                        | 61.90393368                         | 522.3255234                                      | 0.037839135                                        |
| 0.911149079                                        | 68.50747932                         | 574.0442726                                      | 0.034932982                                        |
| 0.894103728                                        | 53.89995691                         | 845.1481544                                      | 0.039768364                                        |
| 0.898444167                                        | 33.88735427                         | 258.6704476                                      | 0.051025965                                        |
| 0.916756179                                        | 66.09655651                         | 555.3328732                                      | 0.035606528                                        |
| 0.910726184                                        | 70.66603776                         | 745.5443353                                      | 0.035872018                                        |
| 0.911777279                                        | 45.05449198                         | 322.459653                                       | 0.041808204                                        |
| 0.925712954                                        | 80.14503528                         | 453.4067775                                      | 0.032188093                                        |
| 0.916659238                                        | 57.58825963                         | 427.9801756                                      | 0.03817549                                         |
| 0.940023754                                        | 120.2221545                         | 1158.631175                                      | 0.026159856                                        |
| 0.87572786                                         | 43.01383632                         | 276.0480745                                      | 0.044818801                                        |
| 0.921675773                                        | 151.8254671                         | 3242.075899                                      | 0.026708372                                        |
| 0.927535127                                        | 66.94122757                         | 410.6723193                                      | 0.035818103                                        |
| 0.936977001                                        | 44.65702479                         | 292.3149945                                      | 0.046229339                                        |
| 0.922735521                                        | 51.04572351                         | 481.943698                                       | 0.040466526                                        |
| 0.890553168                                        | 46.76471361                         | 453.0105562                                      | 0.041347731                                        |
| 0.915957051                                        | 63.11392766                         | 457.6895359                                      | 0.035225982                                        |
| 0.90600405                                         | 72.83926124                         | 599.4056528                                      | 0.033938401                                        |
| 0.905392753                                        | 39.18787918                         | 227.5126086                                      | 0.045670904                                        |
| 0.816227873                                        | 56.10273179                         | 441.6444903                                      | 0.041652415                                        |
| 0.926586422                                        | 72.11029453                         | 712.5929948                                      | 0.034859235                                        |
| 0.936875194                                        | 137.1169234                         | 1203.233106                                      | 0.024644871                                        |
| 0.911358523                                        | 63.33037284                         | 543.2490281                                      | 0.038944193                                        |
| 0.875439726                                        | 59.86538033                         | 488.3920161                                      | 0.038205431                                        |
| 0.892873699                                        | 150.9506409                         | 1934.42496                                       | 0.032227022                                        |
| 0.916545298                                        | 71.17366172                         | 603.2555059                                      | 0.034202803                                        |
| 0.924647464                                        | 90.10399371                         | 1442.667108                                      | 0.030700307                                        |
| 0.874919751                                        | 50.93265669                         | 831.5734617                                      | 0.042754817                                        |
| 0.792928782                                        | 39.28350797                         | 967.2017436                                      | 0.047778916                                        |
| 0.925735537                                        | 44.60210055                         | 200.2734023                                      | 0.04476584                                         |
| 0.933875811                                        | 127.719075                          | 1571.8051                                        | 0.027055694                                        |
| 0.944888956                                        | 89.9877896                          | 698.6764127                                      | 0.031243039                                        |
| 0.898995965                                        | 61.12585578                         | 466.0918698                                      | 0.037048376                                        |
| 0.92892177                                         | 51.35796982                         | 350.9325332                                      | 0.039561043                                        |
| 0.928918063                                        | 83.7307823                          | 903.5848447                                      | 0.033027774                                        |
| 0.889854603                                        | 73.74334306                         | 479.0839877                                      | 0.033545124                                        |
| 0.904031186                                        | 51.80300857                         | 337.5836559                                      | 0.039152801                                        |
| 0.857661342                                        | 90.14858263                         | 1247.024249                                      | 0.032675587                                        |
| 0.84515008                                         | 53.20191508                         | 563.3025457                                      | 0.040599446                                        |
| 0.883930923                                        | 49.71655547                         | 749.0041944                                      | 0.041905509                                        |
| 0.906848597                                        | 52.52353129                         | 345.8116934                                      | 0.039527731                                        |
| 0.919163199                                        | 54.58130708                         | 507.3253351                                      | 0.039231493                                        |
| 0.930568877                                        | 119.027679                          | 1152.067667                                      | 0.026824389                                        |
| 0.930768245                                        | 85.95596125                         | 586.333486                                       | 0.03028962                                         |
| 0.918271976                                        | 72.91807567                         | 693.2466061                                      | 0.033501561                                        |
| 0.911312749                                        | 61.97021294                         | 657.3858728                                      | 0.040615063                                        |
| 0.934245991                                        | 76.3113456                          | 742.444681                                       | 0.032689553                                        |
| 0.940231362                                        | 96.35756278                         | 1240.513453                                      | 0.030298634                                        |
| 0.943615506                                        | 62.51805071                         | 309.0148328                                      | 0.040625884                                        |
| 0.909013678                                        | 80.26112634                         | 641.7386896                                      | 0.032942828                                        |
| 0.905761303                                        | 75.71540161                         | 797.7659071                                      | 0.034004108                                        |
| 0.918047763                                        | 86.79583002                         | 1057.452839                                      | 0.031985546                                        |
| 0.933085959                                        | 83.06279974                         | 725.5969857                                      | 0.031653912                                        |
| 0.862651942                                        | 27.39204082                         | 239.1773964                                      | 0.063673469                                        |
| 0.942871011                                        | 117.4697232                         | 835.994281                                       | 0.03633218                                         |
| 0.866073695                                        | 55.0163794                          | 836.1977486                                      | 0.039438101                                        |
| 0.93419369                                         | 113.8857005                         | 690.6813107                                      | 0.02690583                                         |
| 0.927444358                                        | 74.16963358                         | 833.0122117                                      | 0.03325995                                         |
| 0.895320177                                        | 96.70377233                         | 1029.053396                                      | 0.030400639                                        |
| 0.870573705                                        | 42.77502682                         | 619.0406659                                      | 0.044252086                                        |
| 0.962330936                                        | 279.7513774                         | 1540.530898                                      | 0.019385777                                        |
| 0.923368798                                        | 133.2765865                         | 1155.420303                                      | 0.025636427                                        |
| 0.949903961                                        | 54.36722553                         | 322.7610627                                      | 0.043537047                                        |
| 0.930718544                                        | 121.6546357                         | 1526.868431                                      | 0.03260523                                         |
| 0.911281666                                        | 115.2031947                         | 1070.262557                                      | 0.029471053                                        |

| wavelet.LHL_glszm_SizeZoneNonUniformityNormalized | wavelet.LHL_glszm_SizeZoneNonUniformity | wavelet.LHL_glszm_GrayLevelNonUniformity | wavelet.LHL_glszm_LargeAreaEmphasis | wavelet.LHL_glszm_ZoneVariance |
|---------------------------------------------------|-----------------------------------------|------------------------------------------|-------------------------------------|--------------------------------|
| 0.518150386                                       | 217.1050119                             | 12.89976134                              | 5.928400955                         | 3.089296598                    |
| 0.444507842                                       | 382.2767442                             | 33.77906977                              | 65.13604651                         | 59.30325987                    |
| 0.519744898                                       | 145.5285714                             | 9.878571429                              | 3.507142857                         | 1.104642857                    |
| 0.555956061                                       | 914.5477204                             | 43.58358663                              | 7.798784195                         | 5.232945002                    |
| 0.46299797                                        | 95.84057971                             | 9.028985507                              | 5.202898551                         | 2.195103736                    |
| 0.498710413                                       | 185.0215633                             | 14.47708895                              | 6.02425876                          | 3.020437224                    |
| 0.49502482                                        | 104.450237                              | 8.620853081                              | 3.834123223                         | 1.283214663                    |
| 0.526967118                                       | 348.3252648                             | 18.22239032                              | 3.39183056                          | 1.093923158                    |
| 0.514464601                                       | 648.2253968                             | 38.92698413                              | 5.175396825                         | 2.452896825                    |
| 0.473070446                                       | 786.2430806                             | 57.84596871                              | 8.244283995                         | 4.769716216                    |
| 0.472485822                                       | 217.3434783                             | 17.63913043                              | 6.180434783                         | 2.948256144                    |
| 0.476853226                                       | 400.079857                              | 24.20381406                              | 6.026221692                         | 2.906093155                    |
| 0.48214063                                        | 564.5866781                             | 31.40478224                              | 6.278394535                         | 3.141472578                    |
| 0.416608654                                       | 223.3022388                             | 24.76492537                              | 10.07089552                         | 5.720246714                    |
| 0.5364264                                         | 306.2994746                             | 17.48336252                              | 4.936952715                         | 2.391502909                    |
| 0.491463615                                       | 1175.089502                             | 90.34671685                              | 1137.630698                         | 1129.188891                    |
| 0.552896482                                       | 228.346247                              | 14.03631961                              | 6.760290557                         | 3.903945031                    |
| 0.484144465                                       | 603.7281476                             | 35.34643144                              | 9.942261427                         | 6.445031508                    |
| 0.479322408                                       | 168.2421652                             | 13.16524217                              | 4.324786325                         | 1.575425254                    |
| 0.455341911                                       | 566.4453376                             | 49.60289389                              | 43.65675241                         | 38.5870151                     |
| 0.524382243                                       | 1293.650993                             | 87.13619781                              | 135.0579651                         | 130.57394                      |
| 0.516288005                                       | 543.134981                              | 27.65969582                              | 4.874524715                         | 2.201361882                    |
| 0.509099967                                       | 714.7763533                             | 50.1994302                               | 47.46509972                         | 43.68146515                    |
| 0.605848184                                       | 202.3532934                             | 8.48502994                               | 3.278443114                         | 1.204498189                    |
| 0.495942594                                       | 310.4600639                             | 25.11501597                              | 13.03514377                         | 9.335973624                    |
| 0.516732205                                       | 209.2765432                             | 13.93333333                              | 6.083950617                         | 3.147593355                    |
| 0.44402937                                        | 676.2567301                             | 65.28627708                              | 49.26066973                         | 44.08153379                    |
| 0.489843479                                       | 364.4435484                             | 29.59408602                              | 10.12768817                         | 6.417922231                    |
| 0.502165515                                       | 531.2911153                             | 32.38185255                              | 5.237240076                         | 2.454208819                    |
| 0.44616759                                        | 413.1511879                             | 36.74514039                              | 235.8228942                         | 228.2870984                    |
| 0.459260331                                       | 793.6018519                             | 65.54166667                              | 6.904513889                         | 3.520021206                    |
| 0.423931367                                       | 889.4080076                             | 95.34890372                              | 89.38512869                         | 81.39601836                    |
| 0.503615774                                       | 567.5749778                             | 39.09405501                              | 7.665483585                         | 4.411413329                    |
| 0.502485207                                       | 32.66153846                             | 2.569230769                              | 3.815384615                         | 1.255384615                    |
| 0.523550684                                       | 110.4691943                             | 7.900473934                              | 3.772511848                         | 1.296736372                    |
| 0.440932136                                       | 424.1767152                             | 36.4012474                               | 12.88773389                         | 8.478607025                    |
| 0.461869209                                       | 701.5793285                             | 53.06319947                              | 8.761026991                         | 5.166270904                    |
| 0.485815858                                       | 802.5677966                             | 65.69733656                              | 30.32808717                         | 26.20610574                    |
| 0.453429371                                       | 182.278607                              | 20.51243781                              | 11.56467662                         | 7.25027227                     |
| 0.503965602                                       | 298.851602                              | 21.11467116                              | 7.92074199                          | 4.791482416                    |
| 0.511687374                                       | 415.4901478                             | 29.12807882                              | 8.706896552                         | 5.411687981                    |
| 0.454827455                                       | 232.4168297                             | 21.36399217                              | 7.469667319                         | 3.991551809                    |
| 0.49951826                                        | 491.0264496                             | 31.64089522                              | 5.094608342                         | 2.304383057                    |
| 0.486246808                                       | 275.70194                               | 21.64550265                              | 6.534391534                         | 3.266394807                    |
| 0.563216873                                       | 696.6992724                             | 32.35974131                              | 3.90458367                          | 1.604560019                    |
| 0.464627409                                       | 445.5776851                             | 42.98123045                              | 35.92492179                         | 30.52741548                    |
| 0.549503871                                       | 1400.685367                             | 68.07963907                              | 10.77532366                         | 7.2743951                      |
| 0.526947108                                       | 182.3236994                             | 12.39306358                              | 5.303468208                         | 2.464340606                    |
| 0.545971074                                       | 48.04545455                             | 4.068181818                              | 3.568181818                         | 1.249483471                    |
| 0.501198103                                       | 143.3426573                             | 11.57342657                              | 5.772727273                         | 2.752909678                    |
| 0.448476655                                       | 737.2956204                             | 67.9756691                               | 22.41240876                         | 18.07466508                    |
| 0.463424467                                       | 209.0044346                             | 15.88691796                              | 6.667405765                         | 3.304939504                    |
| 0.47329568                                        | 951.7976131                             | 68.25012432                              | 12.89457981                         | 9.284390848                    |
| 0.467633892                                       | 141.6930693                             | 13.83828383                              | 7.924092409                         | 4.119661471                    |
| 0.434621122                                       | 956.6010904                             | 91.67696502                              | 1053.134484                         | 1044.351246                    |
| 0.493435186                                       | 262.5075188                             | 18.54511278                              | 4.614661654                         | 1.884712957                    |
| 0.531909654                                       | 756.3755274                             | 35.04500703                              | 3.730661041                         | 1.352298421                    |
| 0.437297188                                       | 300.8604651                             | 26.79360465                              | 6.731104651                         | 3.199108893                    |
| 0.487900152                                       | 187.8415584                             | 14.70909091                              | 35.97402597                         | 31.50382189                    |
| 0.519430397                                       | 229.5882353                             | 14.24434389                              | 24.48642534                         | 20.51352859                    |
| 0.489276786                                       | 586.1535893                             | 40.97495826                              | 8.319694999                         | 5.191112204                    |
| 0.520135128                                       | 1681.076733                             | 7.464108911                              | 99.22339109                         | 4.591335638                    |
| 0.480838658                                       | 685.1950877                             | 60.92561404                              | 54.59649123                         | 49.89444137                    |
| 0.417927965                                       | 334.7602996                             | 38.27091136                              | 400.3707865                         | 388.7461771                    |
| 0.510445363                                       | 67.37878788                             | 5.909090909                              | 4.462121212                         | 1.759584481                    |
| 0.548107559                                       | 544.8189135                             | 26.89336016                              | 5.423541247                         | 2.982527965                    |
| 0.580752952                                       | 155.641791                              | 8.373134328                              | 3.134328358                         | 0.97289953                     |
| 0.460836201                                       | 732.7295597                             | 58.90691824                              | 16.42704403                         | 12.38416241                    |
| 0.493717421                                       | 133.3037037                             | 10.68148148                              | 4.540740741                         | 1.8121262                      |
| 0.52704735                                        | 648.7952884                             | 40.65718928                              | 5.056864338                         | 2.388113459                    |
| 0.491743289                                       | 744.4993395                             | 50.78731836                              | 42.23117569                         | 38.19940878                    |
| 0.455540022                                       | 261.0244328                             | 22.43455497                              | 10.45549738                         | 6.573290815                    |
| 0.490354214                                       | 1096.432021                             | 73.06261181                              | 223.2853309                         | 217.9433614                    |
| 0.453135686                                       | 1170.449477                             | 104.8683701                              | 202.7286101                         | 195.9682075                    |
| 0.466184324                                       | 1965.433112                             | 176.6736243                              | 67.15939279                         | 62.41823774                    |
| 0.435623672                                       | 256.582343                              | 23.28183362                              | 7.473684211                         | 3.88365651                     |
| 0.498377664                                       | 314.9746835                             | 24.7943038                               | 6.435126582                         | 3.311405925                    |
| 0.556151221                                       | 218.56743                               | 10.54198473                              | 3.994910941                         | 1.585701429                    |
| 0.526425975                                       | 570.6457565                             | 32.83394834                              | 4.942804428                         | 2.294678722                    |
| 0.512483379                                       | 845.5975758                             | 55.27757576                              | 6.92                                | 3.944897704                    |
| 0.500865435                                       | 136.7362637                             | 11.08791209                              | 8.923076923                         | 5.514792899                    |
| 0.555811845                                       | 477.4423749                             | 28.08032596                              | 4.259604191                         | 1.822516097                    |
| 0.565129997                                       | 1044.925365                             | 56.02217415                              | 3.597620335                         | 1.317504002                    |
| 0.636346498                                       | 65.54368932                             | 4.184466019                              | 2.980582524                         | 0.998774625                    |
| 0.489121822                                       | 885.3104972                             | 59.62651934                              | 14.4281768                          | 10.918247                      |
| 0.462902587                                       | 1323.901399                             | 97.25174825                              | 9.948251748                         | 6.282231894                    |
| 0.497450065                                       | 222.360179                              | 14.29753915                              | 7.176733781                         | 4.147420787                    |
| 0.521091913                                       | 508.0646154                             | 30.8625641                               | 4.092307692                         | 1.558496778                    |
| 0.363265306                                       | 25.42857143                             | 4.457142857                              | 22.52857143                         | 15.69408163                    |
| 0.44766436                                        | 30.44117647                             | 2.470588235                              | 2.955882353                         | 0.571583045                    |
| 0.425619895                                       | 696.7397679                             | 64.56017104                              | 97.58032987                         | 91.68406605                    |
| 0.522079672                                       | 232.8475336                             | 12                                       | 4.452914798                         | 1.947153572                    |
| 0.543419413                                       | 341.8108108                             | 20.92050874                              | 4.960254372                         | 2.320275199                    |
| 0.491839501                                       | 1024.50168                              | 63.32453193                              | 26.72587614                         | 22.87048827                    |
| 0.429343716                                       | 998.6534824                             | 102.9303525                              | 121.5425623                         | 115.3118939                    |
| 0.65248444                                        | 129.1919192                             | 10.265656566                             | 2.065656566                         | 0.432940516                    |
| 0.526182046                                       | 380.9558011                             | 18.56077348                              | 6.035911602                         | 3.21499649                     |
| 0.53569497                                        | 46.06976744                             | 3.744186047                              | 2.639534884                         | 0.593969713                    |
| 0.498046875                                       | 111.5625                                | 7.303571429                              | 5.138392857                         | 2.275649713                    |
| 0.520246685                                       | 237.7527352                             | 13.46827133                              | 7.695842451                         | 4.57756561                     |

| wavelet.LHL_glszm_ZonePercentage | wavelet.LHL_glszm_LargeAreaLowGrayLevelEmphasis | wavelet.LHL_glszm_LargeAreaHighGrayLevelEmphasis | wavelet.LHL_glszm_HighGrayLevelZoneEmphasis |
|----------------------------------|-------------------------------------------------|--------------------------------------------------|---------------------------------------------|
| 0.593484419                      | 0.010622293                                     | 5799.272076                                      | 1013.033413                                 |
| 0.414058739                      | 0.153894323                                     | 28917.88256                                      | 530.2093023                                 |
| 0.64516129                       | 0.016120827                                     | 1973.228571                                      | 631.25                                      |
| 0.624288425                      | 0.006112941                                     | 12364.84681                                      | 1756.240122                                 |
| 0.576601671                      | 0.015303079                                     | 3430.753623                                      | 624.3285024                                 |
| 0.576982893                      | 0.028682449                                     | 2077.407008                                      | 423.9433962                                 |
| 0.62611276                       | 0.009572767                                     | 3748.654028                                      | 948.4407583                                 |
| 0.659680639                      | 0.00406796                                      | 5247.402421                                      | 1473.406959                                 |
| 0.606060606                      | 0.006495662                                     | 9760.074603                                      | 1983.20873                                  |
| 0.536475145                      | 0.007993598                                     | 10212.38207                                      | 1277.034898                                 |
| 0.556227328                      | 0.013601544                                     | 4223.423913                                      | 738.1673913                                 |
| 0.566126856                      | 0.006957185                                     | 7569.595948                                      | 1403.479142                                 |
| 0.56460945                       | 0.003491422                                     | 16471.60205                                      | 3035.529462                                 |
| 0.479427549                      | 0.043021249                                     | 3283.255597                                      | 352.9402985                                 |
| 0.626783754                      | 0.003324573                                     | 16308.54291                                      | 3524.33275                                  |
| 0.344177343                      | 0.554834452                                     | 2343397.015                                      | 2164.376412                                 |
| 0.591690544                      | 0.013028234                                     | 5855.053269                                      | 870.1210654                                 |
| 0.534734134                      | 0.007895195                                     | 15352.95028                                      | 1730.757017                                 |
| 0.603092784                      | 0.022161771                                     | 2036.615385                                      | 475.8119658                                 |
| 0.444127097                      | 0.060058562                                     | 32996.38424                                      | 829.7315113                                 |
| 0.472243492                      | 0.172732026                                     | 107068.1544                                      | 853.7612485                                 |
| 0.611627907                      | 0.005232469                                     | 7419.421103                                      | 1678.196768                                 |
| 0.5140974                        | 0.057726953                                     | 40328.3198                                       | 900.1972934                                 |
| 0.694386694                      | 0.004671522                                     | 7728.185629                                      | 2437.748503                                 |
| 0.519933555                      | 0.036232252                                     | 6388.795527                                      | 561.0319489                                 |
| 0.583573487                      | 0.012920815                                     | 4752.041975                                      | 826.2716049                                 |
| 0.439411425                      | 0.100234162                                     | 25263.21011                                      | 562.6769534                                 |
| 0.519190509                      | 0.017995231                                     | 7060.032258                                      | 738.4637097                                 |
| 0.599433428                      | 0.012137016                                     | 3334.050095                                      | 775.8185255                                 |
| 0.364280094                      | 0.577714293                                     | 98060.71274                                      | 455.1274298                                 |
| 0.543567159                      | 0.012703236                                     | 5090.385995                                      | 777.7893519                                 |
| 0.353794266                      | 0.207305027                                     | 39871.11487                                      | 536.7287893                                 |
| 0.554353173                      | 0.017078956                                     | 4759.853594                                      | 660.9432121                                 |
| 0.625                            | 0.06754227                                      | 4165.061538                                      | 1244.169231                                 |
| 0.635542169                      | 0.036669336                                     | 1398.924171                                      | 383.2654028                                 |
| 0.476237624                      | 0.022267476                                     | 8847.917879                                      | 748.8669439                                 |
| 0.527430556                      | 0.014895189                                     | 6621.250165                                      | 795.4825543                                 |
| 0.492546213                      | 0.028331099                                     | 33890.66586                                      | 1172.745763                                 |
| 0.481437126                      | 0.040172368                                     | 4372.723881                                      | 372.5572139                                 |
| 0.565300286                      | 0.015484306                                     | 5388.784148                                      | 748.4249578                                 |
| 0.550881954                      | 0.012527735                                     | 8286.594828                                      | 1001.817734                                 |
| 0.536201469                      | 0.02141316                                      | 3922.414873                                      | 467.0313112                                 |
| 0.598660171                      | 0.021632816                                     | 2877.822991                                      | 614.1169888                                 |
| 0.553170732                      | 0.017640801                                     | 3484.534392                                      | 580.3597884                                 |
| 0.658679446                      | 0.004237656                                     | 6277.776071                                      | 1499.590946                                 |
| 0.43043088                       | 0.122662288                                     | 11407.51721                                      | 382.472367                                  |
| 0.597515237                      | 0.003281402                                     | 40481.4794                                       | 4184.997254                                 |
| 0.59348199                       | 0.019641241                                     | 2376.618497                                      | 531.3063584                                 |
| 0.656716418                      | 0.035920688                                     | 1434.420455                                      | 385.2272727                                 |
| 0.575452716                      | 0.014061635                                     | 3823.814685                                      | 653.1818182                                 |
| 0.480140187                      | 0.041017202                                     | 13293.73783                                      | 643.2354015                                 |
| 0.545344619                      | 0.01862887                                      | 4214.736142                                      | 649.9135255                                 |
| 0.526302015                      | 0.01965224                                      | 9866.370462                                      | 832.7722526                                 |
| 0.512690355                      | 0.047884273                                     | 2167.884488                                      | 314.0033003                                 |
| 0.337421432                      | 1.928319594                                     | 577698.0604                                      | 649.1281236                                 |
| 0.60523322                       | 0.008786936                                     | 4224.659774                                      | 961.3157895                                 |
| 0.648426813                      | 0.004305818                                     | 5793.553446                                      | 1596.604079                                 |
| 0.532095901                      | 0.012134435                                     | 5334.559593                                      | 790.6046512                                 |
| 0.472972973                      | 0.056855904                                     | 24861.15844                                      | 689.1584416                                 |
| 0.501702611                      | 0.013377294                                     | 58287.97285                                      | 2556.165158                                 |
| 0.565361019                      | 0.014034311                                     | 6334.944908                                      | 812.3038397                                 |
| 0.58996349                       | 0.004785901                                     | 13495.26114                                      | 1903.356436                                 |
| 0.461165049                      | 0.053668881                                     | 56918.15719                                      | 1154.710877                                 |
| 0.293299158                      | 0.285127802                                     | 566279.3246                                      | 1460.601748                                 |
| 0.608294931                      | 0.05357062                                      | 1202.636364                                      | 275.780303                                  |
| 0.640051513                      | 0.007420849                                     | 10564.56237                                      | 2032.857143                                 |
| 0.680203046                      | 0.010553221                                     | 2478.779851                                      | 865.4440299                                 |
| 0.497341257                      | 0.032234017                                     | 9765.136478                                      | 649.8138365                                 |
| 0.605381166                      | 0.020230778                                     | 2093.551852                                      | 478.162963                                  |
| 0.612133267                      | 0.006116607                                     | 5704.705118                                      | 1182.779854                                 |
| 0.498026316                      | 0.084393157                                     | 23552.46169                                      | 654.1268164                                 |
| 0.507528787                      | 0.035546255                                     | 4347.006981                                      | 472.6614311                                 |
| 0.432662539                      | 0.138400055                                     | 362805.2156                                      | 1699.392665                                 |
| 0.384603931                      | 0.273859358                                     | 151501.2892                                      | 789.7684863                                 |
| 0.459259259                      | 0.06799977                                      | 67350.81641                                      | 1042.938093                                 |
| 0.527777778                      | 0.023393424                                     | 3404.139219                                      | 500.6112054                                 |
| 0.565801253                      | 0.015647025                                     | 4086.643987                                      | 683.8607595                                 |
| 0.644262295                      | 0.008890566                                     | 5432.977099                                      | 1484.076336                                 |
| 0.614512472                      | 0.012089381                                     | 3276.45572                                       | 747.9261993                                 |
| 0.579761068                      | 0.010211005                                     | 5933.253939                                      | 913.3206061                                 |
| 0.541666667                      | 0.017037682                                     | 6656.021978                                      | 868.9047619                                 |
| 0.640566741                      | 0.007928232                                     | 3863                                             | 951.2037253                                 |
| 0.662249284                      | 0.003361923                                     | 5698.976744                                      | 1587.595457                                 |
| 0.710344828                      | 0.036739884                                     | 1130.116505                                      | 381.9902913                                 |
| 0.533765851                      | 0.022210795                                     | 10792.93481                                      | 866.6762431                                 |
| 0.522279036                      | 0.011542245                                     | 9935.828322                                      | 1102.38007                                  |
| 0.574550129                      | 0.008114181                                     | 9706.230425                                      | 1419.454139                                 |
| 0.628221649                      | 0.006826835                                     | 4079.636923                                      | 972.2646154                                 |
| 0.382513661                      | 0.126563317                                     | 7751.842857                                      | 368.5857143                                 |
| 0.647619048                      | 0.018000186                                     | 3941.455882                                      | 1271.470588                                 |
| 0.411823899                      | 0.082618076                                     | 117164.7227                                      | 1247.311546                                 |
| 0.631728045                      | 0.012352805                                     | 3224.825112                                      | 886.3766816                                 |
| 0.615459883                      | 0.007239977                                     | 5186.875994                                      | 1071.785374                                 |
| 0.509290954                      | 0.022949498                                     | 33422.59001                                      | 1383.25012                                  |
| 0.400620048                      | 0.144860607                                     | 103271.055                                       | 902.9084265                                 |
| 0.782608696                      | 0.007733879                                     | 3503.151515                                      | 1835.217172                                 |
| 0.595394737                      | 0.007369814                                     | 8744.16989                                       | 1520.941989                                 |
| 0.699186992                      | 0.072757107                                     | 1083.616279                                      | 418.0232558                                 |
| 0.591029024                      | 0.007876003                                     | 9982.790179                                      | 2066.700893                                 |
| 0.566294919                      | 0.012531342                                     | 10456.71772                                      | 1412.463895                                 |

| wavelet.LHL_glszm_SmallAreaEmphasis | wavelet.LHL_glszm_LowGrayLevelZoneEmphasis | wavelet.LHL_glszm_ZoneEntropy | wavelet.LHL_glszm_SmallAreaLowGrayLevelEmphasis | wavelet.LHL_ngtm_Coarseness |
|-------------------------------------|--------------------------------------------|-------------------------------|-------------------------------------------------|-----------------------------|
| 0.748072047                         | 0.004690173                                | 6.408373329                   | 0.004278347                                     | 0.009873527                 |
| 0.693177065                         | 0.004839824                                | 6.473084234                   | 0.00396973                                      | 0.004089007                 |
| 0.749005892                         | 0.007360713                                | 6.063199537                   | 0.005944203                                     | 0.014826981                 |
| 0.774094059                         | 0.001547076                                | 6.709356658                   | 0.001384162                                     | 0.002809068                 |
| 0.705545409                         | 0.008139218                                | 5.928056235                   | 0.007564581                                     | 0.017962127                 |
| 0.733980376                         | 0.009101441                                | 6.029831581                   | 0.007806805                                     | 0.009772793                 |
| 0.730912981                         | 0.006409884                                | 5.893287804                   | 0.006095904                                     | 0.018423416                 |
| 0.754065458                         | 0.00255225                                 | 6.507885457                   | 0.002343074                                     | 0.007374177                 |
| 0.745503891                         | 0.001700154                                | 6.598690037                   | 0.000948408                                     | 0.003442248                 |
| 0.715313346                         | 0.001743769                                | 6.652932598                   | 0.001473728                                     | 0.002494938                 |
| 0.714599198                         | 0.004451689                                | 6.301366873                   | 0.003947423                                     | 0.008967503                 |
| 0.717806897                         | 0.002207907                                | 6.713199917                   | 0.001944264                                     | 0.005112477                 |
| 0.721967605                         | 0.001288899                                | 6.981272229                   | 0.00117729                                      | 0.0038964                   |
| 0.670644907                         | 0.008198212                                | 6.243997849                   | 0.006673445                                     | 0.0064184                   |
| 0.760880632                         | 0.002071195                                | 6.375209019                   | 0.001994892                                     | 0.007258403                 |
| 0.728577439                         | 0.001397158                                | 6.593840533                   | 0.000942727                                     | 0.001049583                 |
| 0.771543291                         | 0.00524826                                 | 6.143467533                   | 0.004898701                                     | 0.009701414                 |
| 0.723309003                         | 0.001673064                                | 6.852437982                   | 0.001463028                                     | 0.003658942                 |
| 0.719473455                         | 0.008851275                                | 6.162342312                   | 0.007343847                                     | 0.010990009                 |
| 0.701684032                         | 0.002619289                                | 6.488223797                   | 0.002181584                                     | 0.002875986                 |
| 0.752265402                         | 0.002389725                                | 6.48211873                    | 0.001929295                                     | 0.00147898                  |
| 0.746840997                         | 0.00225749                                 | 6.825367111                   | 0.002056495                                     | 0.004502218                 |
| 0.741458516                         | 0.002340526                                | 6.38338207                    | 0.001973818                                     | 0.002805019                 |
| 0.806177781                         | 0.003614829                                | 6.360392916                   | 0.003520414                                     | 0.01253317                  |
| 0.73205659                          | 0.004600245                                | 6.207228616                   | 0.002718957                                     | 0.005979623                 |
| 0.746529736                         | 0.005391241                                | 6.29596814                    | 0.00495215                                      | 0.010231009                 |
| 0.692656502                         | 0.003624973                                | 6.390863573                   | 0.002839189                                     | 0.002199678                 |
| 0.727610273                         | 0.003832385                                | 6.313551385                   | 0.003349957                                     | 0.005223545                 |
| 0.736326706                         | 0.003493861                                | 6.523689888                   | 0.002944242                                     | 0.004176824                 |
| 0.694365609                         | 0.007513524                                | 6.497221353                   | 0.006382202                                     | 0.003282336                 |
| 0.704077621                         | 0.003163317                                | 6.520038051                   | 0.002599285                                     | 0.002360647                 |
| 0.677283928                         | 0.003790766                                | 6.5602317                     | 0.002928683                                     | 0.001368145                 |
| 0.737644567                         | 0.004287976                                | 6.463636678                   | 0.003652662                                     | 0.003514795                 |
| 0.734884615                         | 0.017011487                                | 5.452836274                   | 0.00478862                                      | 0.047926872                 |
| 0.751618205                         | 0.017292523                                | 5.893685211                   | 0.014441446                                     | 0.019222507                 |
| 0.689563989                         | 0.003360331                                | 6.590428958                   | 0.002783205                                     | 0.003829769                 |
| 0.7065257                           | 0.00292666                                 | 6.620390145                   | 0.002366073                                     | 0.002686764                 |
| 0.724756901                         | 0.001712107                                | 6.406250143                   | 0.001445789                                     | 0.002243428                 |
| 0.700222492                         | 0.009100703                                | 5.96104001                    | 0.008077802                                     | 0.007669693                 |
| 0.737810039                         | 0.003989213                                | 6.355632802                   | 0.003523785                                     | 0.006960469                 |
| 0.743375779                         | 0.003942262                                | 6.363117705                   | 0.003644538                                     | 0.003667086                 |
| 0.700291574                         | 0.006163913                                | 6.182716793                   | 0.00521445                                      | 0.00697145                  |
| 0.734390044                         | 0.008039944                                | 6.508637608                   | 0.006284974                                     | 0.004264397                 |
| 0.724979813                         | 0.004792913                                | 6.288876475                   | 0.004081028                                     | 0.006568007                 |
| 0.778893269                         | 0.002021937                                | 6.595353794                   | 0.001818564                                     | 0.00404151                  |
| 0.708570599                         | 0.007758698                                | 6.244266939                   | 0.006542931                                     | 0.003384204                 |
| 0.769661472                         | 0.000981799                                | 6.848330955                   | 0.000921661                                     | 0.001773324                 |
| 0.753597978                         | 0.006943602                                | 6.125411712                   | 0.006128875                                     | 0.010437823                 |
| 0.767342961                         | 0.01680142                                 | 5.230397779                   | 0.01540739                                      | 0.041531575                 |
| 0.735883071                         | 0.005819833                                | 6.014105827                   | 0.00531062                                      | 0.012646626                 |
| 0.696449733                         | 0.002975642                                | 6.452278806                   | 0.00234481                                      | 0.002231588                 |
| 0.707638693                         | 0.005137915                                | 6.328040116                   | 0.004381301                                     | 0.008762512                 |
| 0.715001637                         | 0.002790794                                | 6.639337972                   | 0.00231358                                      | 0.002083003                 |
| 0.71073595                          | 0.014620774                                | 5.920627828                   | 0.013025822                                     | 0.010346421                 |
| 0.684998773                         | 0.003515463                                | 6.595895171                   | 0.002799406                                     | 0.001193004                 |
| 0.729448292                         | 0.003720738                                | 6.284275768                   | 0.00301466                                      | 0.00800789                  |
| 0.75775141                          | 0.002011174                                | 6.793118645                   | 0.001785093                                     | 0.003149628                 |
| 0.686093976                         | 0.00375086                                 | 6.419481378                   | 0.00325397                                      | 0.005514572                 |
| 0.725992916                         | 0.00545536                                 | 6.202080999                   | 0.005001286                                     | 0.008902762                 |
| 0.748748337                         | 0.003259216                                | 6.498477438                   | 0.003111128                                     | 0.008175143                 |
| 0.72711924                          | 0.003322                                   | 6.501874092                   | 0.002827259                                     | 0.003356384                 |
| 0.749545619                         | 0.001004722                                | 6.68238854                    | 0.000850011                                     | 0.001358047                 |
| 0.720981077                         | 0.001840002                                | 6.365495366                   | 0.001573816                                     | 0.002344914                 |
| 0.670973092                         | 0.002014403                                | 6.342283391                   | 0.001776656                                     | 0.003201423                 |
| 0.742177387                         | 0.024299793                                | 5.632563673                   | 0.022308665                                     | 0.029402778                 |
| 0.768679564                         | 0.001957464                                | 6.626282524                   | 0.001062151                                     | 0.004818933                 |
| 0.789848673                         | 0.006011402                                | 6.079897726                   | 0.00555789                                      | 0.015838375                 |
| 0.705963729                         | 0.003649451                                | 6.5820114                     | 0.002980271                                     | 0.002370644                 |
| 0.730244475                         | 0.008955359                                | 5.927089554                   | 0.008110345                                     | 0.013994289                 |
| 0.754328786                         | 0.002118571                                | 6.479569354                   | 0.001856415                                     | 0.003603697                 |
| 0.728547412                         | 0.0064256                                  | 6.566644853                   | 0.005589057                                     | 0.002655057                 |
| 0.700875468                         | 0.008148543                                | 6.3130121                     | 0.007181702                                     | 0.006687428                 |
| 0.728094159                         | 0.001241615                                | 6.729542222                   | 0.001050572                                     | 0.001475423                 |
| 0.700131037                         | 0.002323695                                | 6.57899493                    | 0.001815627                                     | 0.001112171                 |
| 0.710074972                         | 0.001472542                                | 6.503109669                   | 0.001145874                                     | 0.000820914                 |
| 0.685461133                         | 0.006380756                                | 6.332199187                   | 0.005475783                                     | 0.006649131                 |
| 0.733724412                         | 0.005850152                                | 6.239537615                   | 0.005350881                                     | 0.006138833                 |
| 0.773828534                         | 0.006179108                                | 6.413718321                   | 0.005967057                                     | 0.011335959                 |
| 0.753639353                         | 0.004219367                                | 6.4741194                     | 0.003649511                                     | 0.004307318                 |
| 0.744052238                         | 0.002325702                                | 6.510065316                   | 0.00192719                                      | 0.002552164                 |
| 0.734315159                         | 0.005421499                                | 6.096199784                   | 0.005013182                                     | 0.013473782                 |
| 0.77388187                          | 0.003675393                                | 6.315761965                   | 0.003344075                                     | 0.005293401                 |
| 0.780182421                         | 0.00153647                                 | 6.517926986                   | 0.001372566                                     | 0.002546302                 |
| 0.82342233                          | 0.029020909                                | 5.376696009                   | 0.028228665                                     | 0.037397409                 |
| 0.727187204                         | 0.002863633                                | 6.652018922                   | 0.002372632                                     | 0.002221652                 |
| 0.707562571                         | 0.001731036                                | 6.748834634                   | 0.001382473                                     | 0.001460789                 |
| 0.732987365                         | 0.003263712                                | 6.372304348                   | 0.003035609                                     | 0.009454814                 |
| 0.750084678                         | 0.002972434                                | 6.475095704                   | 0.002617957                                     | 0.004659571                 |
| 0.614405655                         | 0.017929074                                | 5.253794267                   | 0.005784786                                     | 0.040626153                 |
| 0.675449346                         | 0.016148257                                | 5.576361554                   | 0.015803528                                     | 0.047118401                 |
| 0.677506934                         | 0.001637389                                | 6.601606729                   | 0.001348937                                     | 0.002031966                 |
| 0.750518717                         | 0.005287058                                | 6.505081156                   | 0.004740479                                     | 0.01060002                  |
| 0.76541188                          | 0.002969499                                | 6.287984997                   | 0.002679023                                     | 0.006906772                 |
| 0.729037048                         | 0.001665609                                | 6.796878285                   | 0.001406332                                     | 0.001900674                 |
| 0.681455921                         | 0.001966424                                | 6.523756394                   | 0.00155689                                      | 0.001308334                 |
| 0.834973345                         | 0.006674023                                | 6.363076807                   | 0.006499758                                     | 0.019415666                 |
| 0.753559187                         | 0.003322938                                | 6.685788681                   | 0.00307762                                      | 0.007185889                 |
| 0.758943798                         | 0.017463009                                | 5.297269593                   | 0.006944858                                     | 0.045599202                 |
| 0.733453588                         | 0.005557852                                | 6.263818961                   | 0.005409615                                     | 0.018199356                 |
| 0.749400539                         | 0.006574955                                | 6.48337886                    | 0.006174631                                     | 0.009851368                 |



| wavelet.LHH_gldm_GrayLevelNonUniformityNormalized | wavelet.LHH_gldm_DependenceEntropy | wavelet.LHH_gldm_DependenceNonUniformity | wavelet.LHH_gldm_GrayLevelNonUniformity |
|---------------------------------------------------|------------------------------------|------------------------------------------|-----------------------------------------|
| 0.08157918                                        | 6.055415015                        | 142.4022663                              | 57.59490085                             |
| 0.073927271                                       | 6.674593528                        | 377.556572                               | 153.5469427                             |
| 0.037896324                                       | 6.321004634                        | 172.3410138                              | 16.44700461                             |
| 0.064261636                                       | 6.472299054                        | 613.8204934                              | 169.3294118                             |
| 0.066208363                                       | 5.99922433                         | 88.63231198                              | 23.76880223                             |
| 0.058974626                                       | 6.262850597                        | 163.8304821                              | 37.92068429                             |
| 0.023765288                                       | 6.726860672                        | 125.6468843                              | 8.008902077                             |
| 0.046989853                                       | 6.525883116                        | 286.0479042                              | 47.08383234                             |
| 0.073490349                                       | 6.237677045                        | 453.8350168                              | 152.7864358                             |
| 0.049794928                                       | 6.724706596                        | 782.4996772                              | 154.2646869                             |
| 0.033569274                                       | 6.776927505                        | 254.3639661                              | 27.7617896                              |
| 0.038007143                                       | 6.950439286                        | 410.8812416                              | 56.3265857                              |
| 0.053733649                                       | 6.650373873                        | 511.5342334                              | 111.4435873                             |
| 0.059835638                                       | 6.404737436                        | 274.2790698                              | 66.89624329                             |
| 0.088279487                                       | 6.065846073                        | 180.6487377                              | 80.42261251                             |
| 0.19999012                                        | 5.978476476                        | 628.1034979                              | 1389.331366                             |
| 0.064026568                                       | 6.134708322                        | 175.8137536                              | 44.69054441                             |
| 0.084105767                                       | 6.44255692                         | 407.6680961                              | 196.1346484                             |
| 0.060910948                                       | 6.295032397                        | 143.4364261                              | 35.45017182                             |
| 0.065521685                                       | 6.845675008                        | 542.6936808                              | 183.5262406                             |
| 0.105046593                                       | 6.308219461                        | 777.8009188                              | 548.7633997                             |
| 0.037826528                                       | 6.840897892                        | 503.8511628                              | 65.06162791                             |
| 0.19059536                                        | 5.871619736                        | 264.6506774                              | 520.5159282                             |
| 0.032524929                                       | 6.565095982                        | 173.981289                               | 15.64449064                             |
| 0.04258783                                        | 6.849182778                        | 319.3122924                              | 51.27574751                             |
| 0.051532693                                       | 6.576032412                        | 156.8069164                              | 35.76368876                             |
| 0.053739251                                       | 6.811605623                        | 778.5631852                              | 186.2602424                             |
| 0.046148287                                       | 6.737605751                        | 369.4047453                              | 66.13049546                             |
| 0.03246475                                        | 7.20049536                         | 482.9558074                              | 57.30028329                             |
| 0.099583953                                       | 6.640128202                        | 370.8607396                              | 253.1424076                             |
| 0.043343877                                       | 6.848199983                        | 868.1821327                              | 137.7901856                             |
| 0.098667478                                       | 6.484400407                        | 890.3942664                              | 585.098145                              |
| 0.06210101                                        | 6.518422707                        | 451.7850467                              | 126.2513527                             |
| 0.048816568                                       | 5.570162074                        | 34.23076923                              | 5.076923077                             |
| 0.034965162                                       | 6.359916553                        | 121.8072289                              | 11.60843373                             |
| 0.073283992                                       | 6.404026917                        | 409.6207921                              | 148.0336634                             |
| 0.045218461                                       | 7.066612735                        | 649.8659722                              | 130.2291667                             |
| 0.064588816                                       | 6.552352744                        | 736.6028623                              | 216.6308885                             |
| 0.056098103                                       | 6.344319582                        | 211.9556886                              | 46.84191617                             |
| 0.052052843                                       | 6.539861835                        | 277.5662536                              | 54.60343184                             |
| 0.053717167                                       | 6.628848204                        | 343.7137042                              | 79.17910448                             |
| 0.073968657                                       | 6.19737143                         | 210.0786988                              | 70.49213012                             |
| 0.067173955                                       | 6.274222653                        | 391.7941535                              | 110.2996346                             |
| 0.047578346                                       | 6.516454235                        | 285.4643902                              | 48.76780488                             |
| 0.049792962                                       | 6.464105305                        | 535.7028754                              | 93.51118211                             |
| 0.07626334                                        | 6.354852498                        | 465.6974865                              | 169.9147217                             |
| 0.069195719                                       | 6.463084945                        | 917.8073136                              | 295.1889358                             |
| 0.04471754                                        | 6.384559939                        | 181.0171527                              | 26.0703259                              |
| 0.104588995                                       | 5.125853347                        | 32.65671642                              | 14.01492537                             |
| 0.041128056                                       | 6.489537062                        | 150.4849095                              | 20.44064386                             |
| 0.070904289                                       | 6.564373651                        | 711.7651869                              | 242.776285                              |
| 0.044836525                                       | 6.619304282                        | 218.3881499                              | 37.07980653                             |
| 0.035272572                                       | 7.141295936                        | 1083.857891                              | 134.7764983                             |
| 0.034485128                                       | 6.631818464                        | 190.6852792                              | 20.38071066                             |
| 0.136377843                                       | 6.29228231                         | 834.4051817                              | 889.5926721                             |
| 0.050078885                                       | 6.427497842                        | 244.3105802                              | 44.01934016                             |
| 0.049251141                                       | 6.572238629                        | 590.7327861                              | 108.0077519                             |
| 0.043296374                                       | 6.804902391                        | 332.4555298                              | 55.98221191                             |
| 0.096173234                                       | 6.147208684                        | 139.1990172                              | 78.28501229                             |
| 0.10444096                                        | 6.096743546                        | 133.7718502                              | 92.01248581                             |
| 0.09176887                                        | 6.186272357                        | 386.9490326                              | 194.458235                              |
| 0.040306268                                       | 7.173864266                        | 1450.537057                              | 220.7977364                             |
| 0.060860276                                       | 6.793198977                        | 701.810356                               | 188.0582524                             |
| 0.118077283                                       | 6.574807153                        | 337.1076529                              | 322.469059                              |
| 0.090488224                                       | 5.653272949                        | 46.2718894                               | 19.6359447                              |
| 0.074090859                                       | 6.24377184                         | 323.0257566                              | 115.0631037                             |
| 0.036744054                                       | 6.319309789                        | 146.5583756                              | 14.47715736                             |
| 0.068763148                                       | 6.685257387                        | 634.1323115                              | 219.8357835                             |
| 0.060829697                                       | 6.031631484                        | 116.470852                               | 27.13004484                             |
| 0.044016734                                       | 6.782871411                        | 565.7081054                              | 88.51765291                             |
| 0.069474333                                       | 6.600259972                        | 626.0486842                              | 211.2019737                             |
| 0.065259944                                       | 6.259387527                        | 269.0992028                              | 73.67847653                             |
| 0.139811767                                       | 6.0580248                          | 642.0789474                              | 722.5472136                             |
| 0.126778974                                       | 6.230669992                        | 893.1027397                              | 851.4475878                             |
| 0.06944537                                        | 6.801133578                        | 1657.58061                               | 637.5084967                             |
| 0.044096299                                       | 6.567047851                        | 325.8422939                              | 49.21146953                             |
| 0.040801033                                       | 6.701399932                        | 332.0850492                              | 45.5747538                              |
| 0.043773179                                       | 6.327366367                        | 202.2655738                              | 26.70163934                             |
| 0.048178871                                       | 6.679426682                        | 453.2312925                              | 84.98752834                             |
| 0.041688622                                       | 6.992496737                        | 729.826423                               | 118.6458187                             |
| 0.078522613                                       | 5.969887143                        | 107.5952381                              | 39.57539683                             |
| 0.043969213                                       | 6.501117288                        | 432.5988069                              | 58.96271439                             |
| 0.044357959                                       | 6.757015424                        | 795.8746418                              | 123.8474212                             |
| 0.105160523                                       | 5.224405292                        | 32.71034483                              | 15.24827586                             |
| 0.10786867                                        | 6.002188281                        | 565.2618697                              | 365.78266                               |
| 0.050624053                                       | 6.854862843                        | 1272.855734                              | 277.2173119                             |
| 0.091262944                                       | 5.967323514                        | 142.2493573                              | 71.00257069                             |
| 0.03901185                                        | 6.762731344                        | 455.7951031                              | 60.54639175                             |
| 0.107468124                                       | 5.641856588                        | 29.96174863                              | 19.66666667                             |
| 0.091882086                                       | 5.300479118                        | 22.9047619                               | 9.647619048                             |
| 0.08421901                                        | 6.69773365                         | 655.3954717                              | 334.770566                              |
| 0.037501304                                       | 6.492999845                        | 240.4249292                              | 26.47592068                             |
| 0.042089683                                       | 6.472821532                        | 329.2622309                              | 43.01565558                             |
| 0.058473945                                       | 6.863028505                        | 880.8753056                              | 239.1584352                             |
| 0.079464934                                       | 6.562156731                        | 1041.5701                                | 461.3734068                             |
| 0.059163555                                       | 5.897679941                        | 61.97233202                              | 14.96837945                             |
| 0.045250552                                       | 6.679180491                        | 333.8667763                              | 55.02467105                             |
| 0.088902109                                       | 5.100892506                        | 32.43089431                              | 10.93495935                             |
| 0.084676381                                       | 5.927689517                        | 79.53298153                              | 32.09234828                             |
| 0.09746656                                        | 6.183299204                        | 129.8203222                              | 78.65551425                             |

| wavelet.LHH_gldm_SmallDependenceEmphasis | wavelet.LHH_gldm_DependenceNonUniformityNormalized | wavelet.LHH_gldm_DependenceVariance | wavelet.LHH_gldm_LargeDependenceEmphasis |
|------------------------------------------|----------------------------------------------------|-------------------------------------|------------------------------------------|
| 0.339573495                              | 0.201702927                                        | 2.701169257                         | 10.56657224                              |
| 0.374796467                              | 0.181779765                                        | 7.46782527                          | 18.28454502                              |
| 0.627428955                              | 0.39709911                                         | 0.747053452                         | 3.529953917                              |
| 0.421335075                              | 0.232948954                                        | 3.427150064                         | 10.04971537                              |
| 0.422178892                              | 0.246886663                                        | 1.558647124                         | 6.994428969                              |
| 0.469226027                              | 0.254790796                                        | 1.890274254                         | 7.152410575                              |
| 0.602425816                              | 0.372839419                                        | 0.951210277                         | 4.026706231                              |
| 0.501570115                              | 0.28547695                                         | 1.482241107                         | 5.908183633                              |
| 0.349327675                              | 0.218294861                                        | 2.092503865                         | 9.068302068                              |
| 0.449005828                              | 0.252582207                                        | 2.131529911                         | 7.599096191                              |
| 0.522960311                              | 0.307574324                                        | 1.328898175                         | 5.333736397                              |
| 0.506574815                              | 0.277247801                                        | 1.99409741                          | 6.81511471                               |
| 0.451760417                              | 0.246641385                                        | 2.232226333                         | 7.887174542                              |
| 0.439257325                              | 0.245330116                                        | 2.751296879                         | 8.722719141                              |
| 0.324057125                              | 0.198297187                                        | 2.97928357                          | 11.30735456                              |
| 0.17175051                               | 0.090413631                                        | 11.67704188                         | 41.72549302                              |
| 0.437650941                              | 0.251882168                                        | 1.971642269                         | 7.438395415                              |
| 0.318911244                              | 0.174814792                                        | 5.441750836                         | 15.90137221                              |
| 0.437378208                              | 0.24645434                                         | 2.008207272                         | 7.597938144                              |
| 0.374581132                              | 0.193749975                                        | 6.389721068                         | 16.00392717                              |
| 0.3006274                                | 0.148889916                                        | 8.027634706                         | 21.90696784                              |
| 0.508218525                              | 0.292936723                                        | 1.633708761                         | 6.029069767                              |
| 0.158628694                              | 0.096906143                                        | 10.15842408                         | 37.75649945                              |
| 0.594634713                              | 0.361707461                                        | 1.009962785                         | 4.214137214                              |
| 0.482699845                              | 0.265209545                                        | 2.195789782                         | 7.352159468                              |
| 0.408156625                              | 0.225946565                                        | 2.258394306                         | 8.587896254                              |
| 0.406046472                              | 0.224628732                                        | 2.717993839                         | 9.311598384                              |
| 0.469122211                              | 0.257784191                                        | 1.895257291                         | 7.086531752                              |
| 0.503904107                              | 0.273629353                                        | 2.485911612                         | 7.593767705                              |
| 0.332280728                              | 0.145893289                                        | 11.86101752                         | 28.2281668                               |
| 0.476430299                              | 0.27309913                                         | 1.632614987                         | 6.399811261                              |
| 0.281368379                              | 0.150150804                                        | 6.116004766                         | 19.14165261                              |
| 0.417169619                              | 0.222225798                                        | 2.734289535                         | 9.364977865                              |
| 0.516292735                              | 0.329142012                                        | 0.75591716                          | 4.307692308                              |
| 0.586214415                              | 0.366889244                                        | 0.890586442                         | 4.006024096                              |
| 0.373394501                              | 0.20278257                                         | 3.074875012                         | 10.76039604                              |
| 0.418998964                              | 0.225647907                                        | 2.541897666                         | 8.963194444                              |
| 0.414194186                              | 0.21961922                                         | 4.154289559                         | 11.68157424                              |
| 0.425981291                              | 0.253839148                                        | 1.728890961                         | 7.110179641                              |
| 0.488758486                              | 0.264600814                                        | 2.489814168                         | 7.84270734                               |
| 0.420343992                              | 0.233184331                                        | 2.116194039                         | 8.134328358                              |
| 0.389043992                              | 0.220439348                                        | 2.808492318                         | 9.67366212                               |
| 0.418520529                              | 0.238607889                                        | 2.114593919                         | 8.013398295                              |
| 0.485094598                              | 0.278501844                                        | 1.504866151                         | 6.090731707                              |
| 0.489987932                              | 0.285251797                                        | 1.44034224                          | 5.895633653                              |
| 0.397208967                              | 0.209020416                                        | 3.170347044                         | 10.50987433                              |
| 0.396335891                              | 0.215144705                                        | 3.079213326                         | 10.16783872                              |
| 0.530549004                              | 0.310492543                                        | 1.267225477                         | 5.192109777                              |
| 0.314031924                              | 0.243706839                                        | 1.467141902                         | 8.134328358                              |
| 0.519291303                              | 0.302786538                                        | 1.229339822                         | 5.253521127                              |
| 0.400090091                              | 0.207875347                                        | 5.073154588                         | 13.35221963                              |
| 0.463501985                              | 0.264072733                                        | 1.965060701                         | 7.072551391                              |
| 0.496735858                              | 0.283658176                                        | 1.831629514                         | 6.462967809                              |
| 0.541021809                              | 0.322648527                                        | 1.122797976                         | 4.824027073                              |
| 0.280729264                              | 0.127917397                                        | 8.139005346                         | 24.917216                                |
| 0.486064657                              | 0.277941502                                        | 1.510885392                         | 6.119453925                              |
| 0.47302537                               | 0.269371996                                        | 1.671631475                         | 6.528499772                              |
| 0.446683565                              | 0.257119513                                        | 1.583193219                         | 6.707656613                              |
| 0.327028277                              | 0.171006164                                        | 7.640849024                         | 19.3046683                               |
| 0.272677138                              | 0.15184092                                         | 4.823952762                         | 17.21339387                              |
| 0.305608867                              | 0.182609265                                        | 3.741251594                         | 13.24067957                              |
| 0.492058346                              | 0.264793183                                        | 2.717023892                         | 8.137641475                              |
| 0.421130023                              | 0.227123093                                        | 4.87291126                          | 12.26990291                              |
| 0.292780548                              | 0.123437442                                        | 11.6778917                          | 31.27901867                              |
| 0.387345281                              | 0.213234513                                        | 2.762301174                         | 9.930875576                              |
| 0.381258908                              | 0.208001131                                        | 2.729766744                         | 9.991629105                              |
| 0.600862239                              | 0.371975573                                        | 0.841608905                         | 3.873096447                              |
| 0.38575143                               | 0.198352303                                        | 4.154450592                         | 12.46262121                              |
| 0.448756384                              | 0.261145408                                        | 1.504051962                         | 6.511210762                              |
| 0.50336486                               | 0.281306865                                        | 1.926666388                         | 6.625062158                              |
| 0.400505939                              | 0.205937067                                        | 4.350365305                         | 12.37565789                              |
| 0.423606785                              | 0.238351818                                        | 2.062450525                         | 7.905225864                              |
| 0.233226778                              | 0.124241282                                        | 7.52623192                          | 25.02089783                              |
| 0.242385674                              | 0.132981349                                        | 7.195049398                         | 23.21649792                              |
| 0.332608723                              | 0.180564337                                        | 3.664907182                         | 12.88453159                              |
| 0.497358128                              | 0.291973382                                        | 1.569487802                         | 5.965949821                              |
| 0.51437549                               | 0.29730085                                         | 1.402230844                         | 5.601611459                              |
| 0.561240623                              | 0.331582908                                        | 1.23358237                          | 4.862295082                              |
| 0.454886158                              | 0.256933839                                        | 2.077664399                         | 7.411564626                              |
| 0.459022349                              | 0.256439362                                        | 2.169403964                         | 7.53796627                               |
| 0.355038516                              | 0.213482615                                        | 2.022093096                         | 9.027777778                              |
| 0.532312867                              | 0.322594189                                        | 1.258502981                         | 5.061148397                              |
| 0.501190621                              | 0.285055387                                        | 1.596891651                         | 6.086676218                              |
| 0.288977011                              | 0.225588585                                        | 1.489940547                         | 8.986206897                              |
| 0.288173101                              | 0.166694742                                        | 3.900536757                         | 14.58655264                              |
| 0.406327578                              | 0.23244261                                         | 2.224151634                         | 8.390430972                              |
| 0.336311102                              | 0.182839791                                        | 3.873500704                         | 13.01285347                              |
| 0.494249224                              | 0.293682412                                        | 1.442070092                         | 5.768041237                              |
| 0.290603968                              | 0.163725402                                        | 3.820896414                         | 14.60655738                              |
| 0.376830526                              | 0.21814059                                         | 2.04952381                          | 8.80952381                               |
| 0.345041623                              | 0.164879364                                        | 7.238514046                         | 19.16402516                              |
| 0.539687598                              | 0.340545225                                        | 0.822749561                         | 4.223796034                              |
| 0.538259659                              | 0.322174394                                        | 1.111886826                         | 4.819960861                              |
| 0.429508255                              | 0.215372935                                        | 4.153942169                         | 11.7198044                               |
| 0.365023069                              | 0.17939547                                         | 5.044125899                         | 14.79710644                              |
| 0.444157633                              | 0.244949929                                        | 2.52736334                          | 8.359683794                              |
| 0.456585504                              | 0.274561494                                        | 1.975542655                         | 6.927631579                              |
| 0.450022584                              | 0.263665807                                        | 1.529777249                         | 6.528455285                              |
| 0.322890652                              | 0.209849555                                        | 2.30443954                          | 10.0237467                               |
| 0.326708339                              | 0.160867809                                        | 6.439493957                         | 18.43494424                              |



| wavelet.LHH_gldm_LargeDependenceLowGrayLevelEmphasis | wavelet.LHH_gldm_SmallDependenceHighGrayLevelEmphasis | wavelet.LHH_gldm_LargeDependenceHighGrayLevelEmphasis |
|------------------------------------------------------|-------------------------------------------------------|-------------------------------------------------------|
| 0.058838563                                          | 81.90974375                                           | 2199.633144                                           |
| 0.035478008                                          | 225.4229887                                           | 10075.11603                                           |
| 0.005463747                                          | 906.5548406                                           | 4911.792627                                           |
| 0.024465432                                          | 211.8014555                                           | 4675.036053                                           |
| 0.058706153                                          | 106.6075418                                           | 1295.150418                                           |
| 0.014537825                                          | 318.8455176                                           | 4323.169518                                           |
| 0.009362126                                          | 851.4559726                                           | 4664.676558                                           |
| 0.005177079                                          | 773.7787423                                           | 8953.863273                                           |
| 0.034026174                                          | 117.4394114                                           | 2874.925445                                           |
| 0.007790298                                          | 552.5956793                                           | 9127.106843                                           |
| 0.013210491                                          | 444.4722268                                           | 4437.769045                                           |
| 0.008467426                                          | 587.5137704                                           | 7436.499325                                           |
| 0.006685368                                          | 638.7511947                                           | 10771.15381                                           |
| 0.027006207                                          | 188.6311581                                           | 3374.930233                                           |
| 0.052598449                                          | 86.17140406                                           | 2822.744237                                           |
| 0.233968946                                          | 34.80596374                                           | 7600.440766                                           |
| 0.022883967                                          | 182.5954545                                           | 3008.170487                                           |
| 0.049731579                                          | 116.2351269                                           | 5490.737136                                           |
| 0.051971562                                          | 142.8630299                                           | 2177.83677                                            |
| 0.01739517                                           | 390.1166315                                           | 15746.59979                                           |
| 0.05399566                                           | 136.1838734                                           | 9173.748086                                           |
| 0.004434475                                          | 923.540425                                            | 10294.59477                                           |
| 0.556693439                                          | 12.39979263                                           | 2711.043208                                           |
| 0.007153819                                          | 742.8416629                                           | 4599.164241                                           |
| 0.006670849                                          | 827.6079264                                           | 12124.61545                                           |
| 0.020877115                                          | 216.6116321                                           | 4537.113833                                           |
| 0.010953366                                          | 423.6250758                                           | 8811.587421                                           |
| 0.007058452                                          | 632.7900874                                           | 8952.450105                                           |
| 0.004210467                                          | 1259.916632                                           | 18462.8204                                            |
| 0.03152931                                           | 327.9102871                                           | 26169.01613                                           |
| 0.005432931                                          | 751.4268282                                           | 9365.650834                                           |
| 0.044220321                                          | 141.3365412                                           | 8856.99258                                            |
| 0.024731956                                          | 221.7277035                                           | 4315.43876                                            |
| 0.016544901                                          | 450.4975962                                           | 3790.798077                                           |
| 0.015852914                                          | 499.9439937                                           | 3120.76506                                            |
| 0.018024538                                          | 260.690722                                            | 7015.732673                                           |
| 0.004582902                                          | 997.2165006                                           | 20205.14931                                           |
| 0.030506258                                          | 217.7578968                                           | 5395.985092                                           |
| 0.023546328                                          | 198.4550085                                           | 3081.446707                                           |
| 0.009541921                                          | 572.5206717                                           | 8183.148713                                           |
| 0.004850839                                          | 902.4309734                                           | 16407.17707                                           |
| 0.021952671                                          | 219.9545737                                           | 4768                                                  |
| 0.029298932                                          | 153.666109                                            | 2871.385505                                           |
| 0.021764423                                          | 258.7648614                                           | 2920.259512                                           |
| 0.009288272                                          | 399.7696197                                           | 4466.921725                                           |
| 0.01791647                                           | 277.5331079                                           | 6770.216786                                           |
| 0.016886999                                          | 278.0739561                                           | 6672.678387                                           |
| 0.020474411                                          | 530.5232872                                           | 4680.411664                                           |
| 0.209180718                                          | 28.43212065                                           | 636.8656716                                           |
| 0.015679118                                          | 333.0931327                                           | 2933.774648                                           |
| 0.026326499                                          | 241.9350006                                           | 7336.691005                                           |
| 0.022954879                                          | 240.7241085                                           | 3312.344619                                           |
| 0.004375462                                          | 969.2107674                                           | 11367.0424                                            |
| 0.008797686                                          | 537.542916                                            | 4561.993232                                           |
| 0.022520547                                          | 323.5192074                                           | 28033.56232                                           |
| 0.02894987                                           | 244.1603688                                           | 2599.16041                                            |
| 0.010991006                                          | 382.660936                                            | 4739.204742                                           |
| 0.003397703                                          | 1266.183063                                           | 18405.58778                                           |
| 0.163876312                                          | 51.86978812                                           | 2551.873464                                           |
| 0.090516818                                          | 65.35706155                                           | 3663.254257                                           |
| 0.082246556                                          | 63.81758369                                           | 2470.173195                                           |
| 0.003665892                                          | 1328.472562                                           | 20479.45108                                           |
| 0.015922526                                          | 411.0865915                                           | 10768.25631                                           |
| 0.071727196                                          | 141.119922                                            | 14461.32662                                           |
| 0.087679591                                          | 71.12022903                                           | 1579.585253                                           |
| 0.056293438                                          | 99.40146609                                           | 2165.674179                                           |
| 0.014435902                                          | 387.2121122                                           | 2183.553299                                           |
| 0.015705893                                          | 362.7443671                                           | 10735.28871                                           |
| 0.038820393                                          | 120.5236099                                           | 1575.943946                                           |
| 0.006962528                                          | 638.154472                                            | 7743.661363                                           |
| 0.011152212                                          | 495.1370583                                           | 14821.04572                                           |
| 0.012275625                                          | 340.4070739                                           | 5883.235607                                           |
| 0.123352178                                          | 54.0741165                                            | 5244.992067                                           |
| 0.070072871                                          | 90.36352832                                           | 7939.399792                                           |
| 0.009621232                                          | 488.2942222                                           | 18044.39183                                           |
| 0.017223055                                          | 393.4300528                                           | 4246.728495                                           |
| 0.017271167                                          | 312.6567404                                           | 3272.59624                                            |
| 0.013560581                                          | 343.2488524                                           | 2882.178689                                           |
| 0.012395538                                          | 387.9886917                                           | 5523.334467                                           |
| 0.006857653                                          | 652.4079205                                           | 10323.3331                                            |
| 0.04401441                                           | 95.91044244                                           | 2278.640873                                           |
| 0.006757322                                          | 530.257226                                            | 4968.902312                                           |
| 0.003779859                                          | 999.295954                                            | 11968.66655                                           |
| 0.117765878                                          | 25.95714176                                           | 955.9517241                                           |
| 0.055997017                                          | 83.09026019                                           | 4003.497788                                           |
| 0.004944821                                          | 778.7241967                                           | 15558.44722                                           |
| 0.112318328                                          | 56.17182507                                           | 1740.087404                                           |
| 0.005369007                                          | 772.0112954                                           | 8471.884665                                           |
| 0.165125749                                          | 34.69939032                                           | 1519.125683                                           |
| 0.112055816                                          | 52.02120117                                           | 1051.047619                                           |
| 0.021868831                                          | 339.6361439                                           | 17781.19774                                           |
| 0.006388313                                          | 596.7811922                                           | 4459.644476                                           |
| 0.019273599                                          | 285.2257179                                           | 2188.796477                                           |
| 0.006850958                                          | 851.9054498                                           | 21924.48166                                           |
| 0.016822814                                          | 389.7613229                                           | 14617.96969                                           |
| 0.040238166                                          | 136.1457116                                           | 2424.130435                                           |
| 0.006576473                                          | 621.6825567                                           | 9364.254934                                           |
| 0.059098665                                          | 74.34973577                                           | 1078.878049                                           |
| 0.078174208                                          | 61.42008365                                           | 1616.290237                                           |
| 0.108059901                                          | 76.87245237                                           | 3896.851301                                           |

| wavelet.LHH_gldm_SmallDependenceLowGrayLevelEmphasis | wavelet.LHH_gldm_LowGrayLevelEmphasis | wavelet.LHH_gldm_DistanceZoneVariabilityNormalized | wavelet.LHH_gldm_LowIntensityEmphasis |
|------------------------------------------------------|---------------------------------------|----------------------------------------------------|---------------------------------------|
| 0.004252997                                          | 0.007887704                           | 0.936239585                                        | 0.011774355                           |
| 0.001531775                                          | 0.002861791                           | 0.92737629                                         | 0.003901499                           |
| 0.003142028                                          | 0.003436951                           | 0.839100346                                        | 0.004542639                           |
| 0.002130736                                          | 0.003559038                           | 0.898722392                                        | 0.004777603                           |
| 0.00757228                                           | 0.012546214                           | 0.901902497                                        | 0.016921318                           |
| 0.002651841                                          | 0.003602116                           | 0.873513109                                        | 0.005234369                           |
| 0.004134677                                          | 0.004681073                           | 0.703478002                                        | 0.006179676                           |
| 0.001426463                                          | 0.001776854                           | 0.848180737                                        | 0.00256155                            |
| 0.002676657                                          | 0.005174359                           | 0.935850498                                        | 0.007285972                           |
| 0.001458705                                          | 0.001964772                           | 0.95113096                                         | 0.002959906                           |
| 0.003873796                                          | 0.004944799                           | 0.885400521                                        | 0.006666327                           |
| 0.00171497                                           | 0.002265218                           | 0.897280352                                        | 0.003146034                           |
| 0.001008175                                          | 0.001444962                           | 0.945248959                                        | 0.002068432                           |
| 0.003080289                                          | 0.004828954                           | 0.903100823                                        | 0.006553149                           |
| 0.003320577                                          | 0.006769817                           | 0.919450983                                        | 0.010057187                           |
| 0.001855601                                          | 0.006616288                           | 0.921020277                                        | 0.010861229                           |
| 0.00374308                                           | 0.005397888                           | 0.753375467                                        | 0.007844178                           |
| 0.001991592                                          | 0.004208676                           | 0.952301252                                        | 0.005935058                           |
| 0.004794998                                          | 0.010772434                           | 0.841688889                                        | 0.012190631                           |
| 0.000882114                                          | 0.001590596                           | 0.951913761                                        | 0.002211695                           |
| 0.001281924                                          | 0.003043634                           | 0.904048738                                        | 0.004175119                           |
| 0.0009832                                            | 0.001293007                           | 0.83500744                                         | 0.001769144                           |
| 0.004494124                                          | 0.017538239                           | 0.941097476                                        | 0.029892349                           |
| 0.003055711                                          | 0.003537208                           | 0.745654642                                        | 0.004720858                           |
| 0.00225277                                           | 0.002602276                           | 0.88215784                                         | 0.004155111                           |
| 0.003119517                                          | 0.004488889                           | 0.919219045                                        | 0.006896335                           |
| 0.000927601                                          | 0.001619578                           | 0.903176611                                        | 0.002139616                           |
| 0.001301376                                          | 0.001785993                           | 0.956982841                                        | 0.002541816                           |
| 0.001017176                                          | 0.001261459                           | 0.949888516                                        | 0.001843952                           |
| 0.000935806                                          | 0.001716138                           | 0.940324376                                        | 0.002685994                           |
| 0.001079342                                          | 0.001477548                           | 0.958769686                                        | 0.002061782                           |
| 0.000881377                                          | 0.002802253                           | 0.9608202                                          | 0.00354942                            |
| 0.003345293                                          | 0.004831934                           | 0.941819442                                        | 0.007420079                           |
| 0.011600256                                          | 0.012254534                           | 0.834710744                                        | 0.018538947                           |
| 0.004583973                                          | 0.006448492                           | 0.889273356                                        | 0.007686589                           |
| 0.001452855                                          | 0.002459993                           | 0.913606731                                        | 0.003614927                           |
| 0.000602048                                          | 0.000879503                           | 0.951938668                                        | 0.001320884                           |
| 0.002226384                                          | 0.004117742                           | 0.924826797                                        | 0.005377498                           |
| 0.005187568                                          | 0.006841716                           | 0.813211743                                        | 0.010746734                           |
| 0.001965224                                          | 0.002514467                           | 0.959815911                                        | 0.00367319                            |
| 0.0009213                                            | 0.001216505                           | 0.84100808                                         | 0.001973266                           |
| 0.001999439                                          | 0.003325949                           | 0.927866659                                        | 0.004761849                           |
| 0.003981696                                          | 0.006213386                           | 0.92385908                                         | 0.009061423                           |
| 0.003781333                                          | 0.005619937                           | 0.841707992                                        | 0.007323092                           |
| 0.001393363                                          | 0.002161983                           | 0.877505646                                        | 0.002667653                           |
| 0.0014135                                            | 0.002451872                           | 0.956883707                                        | 0.003385794                           |
| 0.001266083                                          | 0.002266578                           | 0.85833502                                         | 0.003064505                           |
| 0.00165661                                           | 0.004826037                           | 0.945694579                                        | 0.004273895                           |
| 0.011813273                                          | 0.037887437                           | 0.8528                                             | 0.048248577                           |
| 0.00407243                                           | 0.005321848                           | 0.850525711                                        | 0.007188668                           |
| 0.001647619                                          | 0.002846408                           | 0.949876449                                        | 0.003892639                           |
| 0.003020532                                          | 0.00466484                            | 0.977780583                                        | 0.00608838                            |
| 0.000642955                                          | 0.000970446                           | 0.921357818                                        | 0.001212754                           |
| 0.002782444                                          | 0.003465039                           | 0.920978747                                        | 0.004725479                           |
| 0.000462081                                          | 0.001119795                           | 0.95301451                                         | 0.001599184                           |
| 0.002865637                                          | 0.006390943                           | 0.856389411                                        | 0.006779197                           |
| 0.001704389                                          | 0.002547306                           | 0.728671359                                        | 0.00337992                            |
| 0.00101086                                           | 0.001224711                           | 0.78068382                                         | 0.002024062                           |
| 0.00566545                                           | 0.012324062                           | 0.916557813                                        | 0.017300023                           |
| 0.003603594                                          | 0.007907683                           | 0.992647159                                        | 0.013086361                           |
| 0.003318655                                          | 0.007971243                           | 0.94329166                                         | 0.010881653                           |
| 0.000465892                                          | 0.000683745                           | 0.919309804                                        | 0.000890823                           |
| 0.001379721                                          | 0.00216476                            | 0.955952379                                        | 0.00303976                            |
| 0.002067443                                          | 0.004004582                           | 0.931952873                                        | 0.007014753                           |
| 0.010675827                                          | 0.016848952                           | 0.95791421                                         | 0.026656622                           |
| 0.006326988                                          | 0.00978461                            | 0.925077941                                        | 0.015492399                           |
| 0.00560484                                           | 0.006783579                           | 0.795416574                                        | 0.008642918                           |
| 0.000985026                                          | 0.001785784                           | 0.971311675                                        | 0.002464299                           |
| 0.008989395                                          | 0.011733003                           | 0.92663746                                         | 0.017781136                           |
| 0.00125338                                           | 0.001733788                           | 0.917661088                                        | 0.002325938                           |
| 0.000863821                                          | 0.001396902                           | 0.874300567                                        | 0.002017332                           |
| 0.00157746                                           | 0.00241309                            | 0.950121821                                        | 0.003448611                           |
| 0.001668762                                          | 0.005549823                           | 0.957337371                                        | 0.007142191                           |
| 0.001032592                                          | 0.003391757                           | 0.960333721                                        | 0.004256426                           |
| 0.000391043                                          | 0.000889907                           | 0.96339946                                         | 0.001132266                           |
| 0.001674782                                          | 0.003869592                           | 0.819010055                                        | 0.003926725                           |
| 0.005783853                                          | 0.006950904                           | 0.855440215                                        | 0.010103593                           |
| 0.004524625                                          | 0.005563073                           | 0.902931038                                        | 0.00740438                            |
| 0.002090822                                          | 0.002917339                           | 0.82832937                                         | 0.004191095                           |
| 0.001064169                                          | 0.001519399                           | 0.894668339                                        | 0.002123334                           |
| 0.00446358                                           | 0.007735194                           | 0.87099304                                         | 0.011998339                           |
| 0.001712519                                          | 0.002258041                           | 0.857669565                                        | 0.002968822                           |
| 0.000753377                                          | 0.001029645                           | 0.939416482                                        | 0.001388859                           |
| 0.014845797                                          | 0.02420356                            | 0.891272189                                        | 0.04475641                            |
| 0.001662304                                          | 0.004471115                           | 0.981187021                                        | 0.005743838                           |
| 0.000453301                                          | 0.000795322                           | 0.843228404                                        | 0.001048189                           |
| 0.005300688                                          | 0.011398365                           | 0.939043474                                        | 0.01561693                            |
| 0.001382583                                          | 0.001772835                           | 0.850024273                                        | 0.002516309                           |
| 0.010997467                                          | 0.019330207                           | 0.964923469                                        | 0.036905842                           |
| 0.028263                                             | 0.034531456                           | 0.844273427                                        | 0.065071561                           |
| 0.001182704                                          | 0.001934919                           | 0.921480114                                        | 0.003201772                           |
| 0.002274924                                          | 0.002784997                           | 0.934572915                                        | 0.003781194                           |
| 0.005939462                                          | 0.007548811                           | 0.839632895                                        | 0.010086477                           |
| 0.000594281                                          | 0.00092411                            | 0.946442628                                        | 0.001303944                           |
| 0.000544103                                          | 0.001483122                           | 0.935159326                                        | 0.001678148                           |
| 0.00932344                                           | 0.011697479                           | 0.817504883                                        | 0.019072764                           |
| 0.001406112                                          | 0.001856751                           | 0.946309609                                        | 0.002752221                           |
| 0.014673168                                          | 0.018952471                           | 0.853867473                                        | 0.029861435                           |
| 0.006548664                                          | 0.012047608                           | 0.883567182                                        | 0.018614088                           |
| 0.004243413                                          | 0.010361397                           | 0.93428664                                         | 0.01434851                            |

| wavelet.LHH_gldzm_LargeDistanceEmphasis | wavelet.LHH_gldzm_HighIntensitySmallDistanceEmphasis | wavelet.LHH_gldzm_LowIntensityLargeDistanceEmphasis | wavelet.LHH_gldzm_HighIntensityEmphasis |
|-----------------------------------------|------------------------------------------------------|-----------------------------------------------------|-----------------------------------------|
| 1.098901099                             | 236.2417582                                          | 0.012711613                                         | 242.3956044                             |
| 1.113207547                             | 579.4539401                                          | 0.004187996                                         | 595.7991121                             |
| 1.264705882                             | 1355.599673                                          | 0.004977771                                         | 1445.575163                             |
| 1.160503541                             | 480.9486625                                          | 0.005450156                                         | 502.7010228                             |
| 1.155172414                             | 237.6537356                                          | 0.01807457                                          | 246.5804598                             |
| 1.203539823                             | 637.3289086                                          | 0.005634276                                         | 674.5368732                             |
| 1.543103448                             | 1275.512931                                          | 0.007599339                                         | 1397.905172                             |
| 1.248275862                             | 1438.547845                                          | 0.002748414                                         | 1538.632759                             |
| 1.099526066                             | 325.4454976                                          | 0.007754947                                         | 334.5379147                             |
| 1.07518797                              | 1207.786497                                          | 0.003078272                                         | 1230.625313                             |
| 1.183070866                             | 807.6062992                                          | 0.006983423                                         | 849.8720472                             |
| 1.162927981                             | 1110.607438                                          | 0.00341488                                          | 1158.24085                              |
| 1.084507042                             | 1371.712676                                          | 0.002152365                                         | 1405.278873                             |
| 1.153169014                             | 410.1888204                                          | 0.007151975                                         | 426.1989437                             |
| 1.126126126                             | 255.4834835                                          | 0.010586632                                         | 265.8528529                             |
| 1.123558484                             | 198.7281713                                          | 0.012331163                                         | 204.8912685                             |
| 1.43220339                              | 372.8142655                                          | 0.012406229                                         | 412.7146893                             |
| 1.073341094                             | 355.8233411                                          | 0.006218991                                         | 363.5180442                             |
| 1.26                                    | 290.5425                                             | 0.016093105                                         | 316.85                                  |
| 1.073952342                             | 1015.336072                                          | 0.002304319                                         | 1037.598192                             |
| 1.151586369                             | 435.6556992                                          | 0.004654842                                         | 453.4829612                             |
| 1.27218345                              | 1689.55334                                           | 0.001965541                                         | 1815.759721                             |
| 1.091121495                             | 76.32184579                                          | 0.032940236                                         | 78.59813084                             |
| 1.448598131                             | 1087.524143                                          | 0.005350043                                         | 1235.984424                             |
| 1.188622754                             | 1612.95771                                           | 0.004272507                                         | 1704.474551                             |
| 1.126506024                             | 511.6378012                                          | 0.007243359                                         | 529.7259036                             |
| 1.153042409                             | 995.2801168                                          | 0.002386368                                         | 1036.837124                             |
| 1.065976714                             | 1320.310479                                          | 0.002637729                                         | 1340.992238                             |
| 1.077151335                             | 2447.69906                                           | 0.0018783                                           | 2504.173096                             |
| 1.092356688                             | 965.0034501                                          | 0.00285298                                          | 986.3131635                             |
| 1.063175868                             | 1540.495589                                          | 0.002131373                                         | 1561.978372                             |
| 1.059968438                             | 492.0529984                                          | 0.003629895                                         | 499.3940032                             |
| 1.089968976                             | 518.7409514                                          | 0.007877689                                         | 529.1509824                             |
| 1.272727273                             | 764.5606061                                          | 0.018791499                                         | 874.7878788                             |
| 1.176470588                             | 819.3936652                                          | 0.008396632                                         | 838.9954751                             |
| 1.135730858                             | 679.2537703                                          | 0.00386419                                          | 703.8097448                             |
| 1.073913043                             | 2323.125725                                          | 0.001362702                                         | 2367.15942                              |
| 1.117350158                             | 507.4317035                                          | 0.006384004                                         | 523.1211356                             |
| 1.312796209                             | 417.799763                                           | 0.011739683                                         | 458.2890995                             |
| 1.061538462                             | 1139.020513                                          | 0.003725902                                         | 1161.405128                             |
| 1.261235955                             | 1998.504565                                          | 0.002112093                                         | 2142.391854                             |
| 1.112412178                             | 549.2412178                                          | 0.005075292                                         | 563.4473068                             |
| 1.118925831                             | 357.3954604                                          | 0.010945104                                         | 368.1534527                             |
| 1.259965338                             | 494.8253899                                          | 0.009311307                                         | 529.339688                              |
| 1.196629213                             | 769.8972378                                          | 0.003087308                                         | 811.9569288                             |
| 1.066132265                             | 685.8269038                                          | 0.004309036                                         | 695.1492986                             |
| 1.230154502                             | 661.9347363                                          | 0.003572837                                         | 701.160895                              |
| 1.083798883                             | 973.375                                              | 0.004446109                                         | 989.6005587                             |
| 1.24                                    | 80.905                                               | 0.064326396                                         | 88.6                                    |
| 1.244067797                             | 593.770339                                           | 0.00797967                                          | 633.3728814                             |
| 1.077170418                             | 596.2155949                                          | 0.004165728                                         | 605.9376206                             |
| 1.033707865                             | 512.3297753                                          | 0.006224108                                         | 515.6988764                             |
| 1.123006834                             | 1867.452961                                          | 0.001297969                                         | 1931.949886                             |
| 1.123626374                             | 968.1476648                                          | 0.005122602                                         | 988.6263736                             |
| 1.07221665                              | 1124.320587                                          | 0.001674446                                         | 1147.329488                             |
| 1.233606557                             | 473.2418033                                          | 0.008384717                                         | 494.9118852                             |
| 1.48559322                              | 710.4472458                                          | 0.004933579                                         | 803.5076271                             |
| 1.376132931                             | 2595.079683                                          | 0.002214446                                         | 2829.654079                             |
| 1.130872483                             | 150.5981544                                          | 0.028450384                                         | 158.1308725                             |
| 1.011070111                             | 236.8597786                                          | 0.013114037                                         | 237.9667897                             |
| 1.087621697                             | 202.3209318                                          | 0.011414344                                         | 208.1947149                             |
| 1.126357354                             | 2608.01999                                           | 0.000983756                                         | 2697.679171                             |
| 1.067594433                             | 949.972664                                           | 0.003140607                                         | 967.1451292                             |
| 1.105802048                             | 470.1720705                                          | 0.007832211                                         | 482.596132                              |
| 1.064516129                             | 177.672043                                           | 0.027426569                                         | 180.3978495                             |
| 1.116941529                             | 252.3009745                                          | 0.022007262                                         | 257.8770615                             |
| 1.347014925                             | 593.744403                                           | 0.01139763                                          | 635.6156716                             |
| 1.043668122                             | 930.5887918                                          | 0.002532259                                         | 940.444687                              |
| 1.11440678                              | 261.9682203                                          | 0.018860525                                         | 268.8644068                             |
| 1.129060579                             | 1215.914399                                          | 0.002609138                                         | 1260.942054                             |
| 1.202173913                             | 1171.655616                                          | 0.005073636                                         | 1237.463768                             |
| 1.07678245                              | 782.488574                                           | 0.003550522                                         | 799.8043876                             |
| 1.065420561                             | 229.2044393                                          | 0.007640127                                         | 233.1962617                             |
| 1.060728745                             | 368.8890977                                          | 0.004444954                                         | 375.3718913                             |
| 1.055944056                             | 1456.747013                                          | 0.001182847                                         | 1476.197844                             |
| 1.301857585                             | 730.1567337                                          | 0.004550008                                         | 785.5789474                             |
| 1.235294118                             | 565.907994                                           | 0.020093157                                         | 608.0030166                             |
| 1.153452685                             | 581.5735294                                          | 0.007784375                                         | 610.4782609                             |
| 1.284482759                             | 786.4827586                                          | 0.004864194                                         | 847.5883621                             |
| 1.167330677                             | 1370.175299                                          | 0.002329008                                         | 1428.374502                             |
| 1.207920792                             | 247.220297                                           | 0.013554923                                         | 263.0445545                             |
| 1.231334149                             | 938.3552632                                          | 0.003544058                                         | 997.2435741                             |
| 1.09380863                              | 1946.325203                                          | 0.001474974                                         | 1996.43965                              |
| 1.173076923                             | 88.62019231                                          | 0.060186086                                         | 92.67307692                             |
| 1.028490028                             | 284.9330484                                          | 0.005844697                                         | 287.5242165                             |
| 1.257209665                             | 1789.723207                                          | 0.002450779                                         | 1910.444271                             |
| 1.094405594                             | 160.6477273                                          | 0.016383447                                         | 166.1993007                             |
| 1.244966443                             | 1463.953579                                          | 0.002790665                                         | 1552.519016                             |
| 1.053571429                             | 122.5714286                                          | 0.038393938                                         | 123.0535714                             |
| 1.255319149                             | 136.1595745                                          | 0.155940355                                         | 136.6382979                             |
| 1.122807018                             | 951.9668616                                          | 0.003417695                                         | 981.1929825                             |
| 1.101580135                             | 1083.3386                                            | 0.003960187                                         | 1107.264108                             |
| 1.263736264                             | 479.3159341                                          | 0.011266937                                         | 520.3469388                             |
| 1.082610913                             | 1944.467109                                          | 0.001360997                                         | 1983.266701                             |
| 1.100636943                             | 1042.764862                                          | 0.001822987                                         | 1068.942251                             |
| 1.3046875                               | 281.0527344                                          | 0.020270412                                         | 308.328125                              |
| 1.082822086                             | 1338.708589                                          | 0.002826246                                         | 1369.016871                             |
| 1.238095238                             | 155.3888889                                          | 0.033151007                                         | 166.2222222                             |
| 1.186206897                             | 183.7982759                                          | 0.022166535                                         | 189.3586207                             |
| 1.102040816                             | 230.3231293                                          | 0.014877968                                         | 237.4047619                             |

| wavelet.LHH_gldzm_DistanceZoneVariability | wavelet.LHH_gldzm_ZonePercentage | wavelet.LHH_gldzm_IntensityVariabilityNormalized | wavelet.LHH_gldzm_LowIntensitySmallDistanceEmphasis | wavelet.LHH_gldzm_IntensityVariability |
|-------------------------------------------|----------------------------------|--------------------------------------------------|-----------------------------------------------------|----------------------------------------|
| 255.5934066                               | 0.386685552                      | 0.057279717                                      | 0.01154004                                          | 15.63736264                            |
| 835.5660377                               | 0.433798748                      | 0.041274894                                      | 0.003829875                                         | 37.18867925                            |
| 256.7647059                               | 0.705069124                      | 0.033000128                                      | 0.004433856                                         | 10.09803922                            |
| 1142.276161                               | 0.482352941                      | 0.044814388                                      | 0.004609465                                         | 56.95908733                            |
| 156.9310345                               | 0.484679666                      | 0.051393843                                      | 0.016633005                                         | 8.942528736                            |
| 296.120944                                | 0.527216174                      | 0.04207238                                       | 0.005134392                                         | 14.26253687                            |
| 163.2068966                               | 0.6884273                        | 0.021997622                                      | 0.00582476                                          | 5.103448276                            |
| 491.9448276                               | 0.578842315                      | 0.037812128                                      | 0.002514834                                         | 21.93103448                            |
| 789.8578199                               | 0.405964406                      | 0.053135037                                      | 0.007168728                                         | 44.84597156                            |
| 1518.005013                               | 0.515171078                      | 0.037376493                                      | 0.002930315                                         | 59.65288221                            |
| 449.7834646                               | 0.61426844                       | 0.030457561                                      | 0.006587053                                         | 15.47244094                            |
| 759.9964581                               | 0.571524966                      | 0.027912948                                      | 0.003078822                                         | 23.64226682                            |
| 1006.690141                               | 0.513500482                      | 0.037298596                                      | 0.002047449                                         | 39.72300469                            |
| 512.9612676                               | 0.508050089                      | 0.045427495                                      | 0.006403442                                         | 25.8028169                             |
| 306.1771772                               | 0.365532382                      | 0.060844628                                      | 0.009924825                                         | 20.26126126                            |
| 1118.118616                               | 0.174751691                      | 0.079594462                                      | 0.010493746                                         | 96.6276771                             |
| 266.6949153                               | 0.507163324                      | 0.049474927                                      | 0.006703666                                         | 17.51412429                            |
| 818.0267753                               | 0.368353345                      | 0.054413923                                      | 0.005864075                                         | 46.74155995                            |
| 252.5066667                               | 0.515463918                      | 0.046511111                                      | 0.011215012                                         | 13.95333333                            |
| 1158.479047                               | 0.434487683                      | 0.03848182                                       | 0.002188539                                         | 46.83237469                            |
| 1538.690952                               | 0.325803982                      | 0.057602793                                      | 0.004055188                                         | 98.039953                              |
| 837.5124626                               | 0.583139535                      | 0.029694565                                      | 0.001720044                                         | 29.78364905                            |
| 402.7897196                               | 0.15671915                       | 0.113001135                                      | 0.029130378                                         | 48.36448598                            |
| 239.3551402                               | 0.667359667                      | 0.025863491                                      | 0.004563562                                         | 8.302180685                            |
| 589.2814371                               | 0.554817276                      | 0.031894295                                      | 0.004125762                                         | 21.30538922                            |
| 305.1807229                               | 0.478386167                      | 0.042622296                                      | 0.006809579                                         | 14.15060241                            |
| 1469.468347                               | 0.469417196                      | 0.037793776                                      | 0.002077928                                         | 61.49047326                            |
| 739.7477361                               | 0.539427774                      | 0.038841629                                      | 0.002517838                                         | 30.02457956                            |
| 960.3372898                               | 0.572804533                      | 0.024197722                                      | 0.001835366                                         | 24.46389713                            |
| 885.7855626                               | 0.370574351                      | 0.043979697                                      | 0.002644248                                         | 41.42887473                            |
| 1684.558338                               | 0.552689525                      | 0.034069106                                      | 0.002044384                                         | 59.85941946                            |
| 1826.5192                                 | 0.320573356                      | 0.054754814                                      | 0.003286203                                         | 104.0889006                            |
| 910.7394002                               | 0.475651746                      | 0.041235508                                      | 0.007305677                                         | 39.87280248                            |
| 55.09090909                               | 0.634615385                      | 0.041322314                                      | 0.018475809                                         | 2.727272727                            |
| 196.5294118                               | 0.665662651                      | 0.031633259                                      | 0.007509078                                         | 6.990950226                            |
| 787.5290023                               | 0.426732673                      | 0.044554562                                      | 0.003552611                                         | 38.40603248                            |
| 1313.675362                               | 0.479166667                      | 0.032293636                                      | 0.00131043                                          | 44.56521739                            |
| 1465.850473                               | 0.472570066                      | 0.041456876                                      | 0.005125871                                         | 65.70914826                            |
| 343.1753555                               | 0.505389222                      | 0.047269828                                      | 0.010498497                                         | 19.9478673                             |
| 561.4923077                               | 0.557673975                      | 0.035844839                                      | 0.003660012                                         | 20.96923077                            |
| 598.7977528                               | 0.483039349                      | 0.037735923                                      | 0.001938559                                         | 26.86797753                            |
| 396.1990632                               | 0.448058762                      | 0.049652003                                      | 0.004683488                                         | 21.20140515                            |
| 722.4578005                               | 0.476248477                      | 0.046336693                                      | 0.008590502                                         | 36.23529412                            |
| 485.6655113                               | 0.562926829                      | 0.037236167                                      | 0.006826038                                         | 21.48526863                            |
| 937.17603                                 | 0.568690096                      | 0.039983378                                      | 0.002562739                                         | 42.70224719                            |
| 954.9609399                               | 0.447935368                      | 0.050094176                                      | 0.003154983                                         | 49.99398798                            |
| 1611.094832                               | 0.439990624                      | 0.045615985                                      | 0.002937422                                         | 85.62120405                            |
| 338.5586592                               | 0.61406518                       | 0.038388315                                      | 0.004230842                                         | 13.74301676                            |
| 42.64                                     | 0.373134328                      | 0.0808                                           | 0.044229122                                         | 4.04                                   |
| 250.9050847                               | 0.593561368                      | 0.036139041                                      | 0.006990918                                         | 10.66101695                            |
| 1477.057878                               | 0.454147196                      | 0.043241488                                      | 0.003824367                                         | 67.24051447                            |
| 435.1123596                               | 0.53808948                       | 0.039363717                                      | 0.006054448                                         | 17.51685393                            |
| 2022.38041                                | 0.574456948                      | 0.027214263                                      | 0.001191451                                         | 59.73530752                            |
| 335.2362637                               | 0.615905245                      | 0.028378215                                      | 0.004626198                                         | 10.32967033                            |
| 1900.310933                               | 0.305687567                      | 0.049022192                                      | 0.001580365                                         | 97.75025075                            |
| 417.9180328                               | 0.555176337                      | 0.038598495                                      | 0.006377817                                         | 18.83606557                            |
| 859.8322034                               | 0.538075695                      | 0.035538638                                      | 0.002991505                                         | 41.93559322                            |
| 516.8126888                               | 0.511987626                      | 0.032758007                                      | 0.001976463                                         | 21.6858006                             |
| 273.1342282                               | 0.366093366                      | 0.065470024                                      | 0.014512433                                         | 19.51006711                            |
| 269.0073801                               | 0.307604994                      | 0.059244836                                      | 0.013079442                                         | 16.05535055                            |
| 678.2267038                               | 0.339310996                      | 0.062908034                                      | 0.01074848                                          | 45.23087622                            |
| 2793.782494                               | 0.554764513                      | 0.027419677                                      | 0.00086759                                          | 83.3283975                             |
| 1442.53214                                | 0.488349515                      | 0.037312243                                      | 0.003014548                                         | 56.30417495                            |
| 819.1865757                               | 0.321860124                      | 0.043408258                                      | 0.006810389                                         | 38.15585893                            |
| 89.08602151                               | 0.428571429                      | 0.063013065                                      | 0.026464135                                         | 5.860215054                            |
| 617.0269865                               | 0.429491307                      | 0.048854883                                      | 0.013863683                                         | 32.5862069                             |
| 213.1716418                               | 0.680203046                      | 0.031688572                                      | 0.007954241                                         | 8.492537313                            |
| 1334.582242                               | 0.429777917                      | 0.03944009                                       | 0.002447309                                         | 54.19068413                            |
| 218.6864407                               | 0.529147982                      | 0.049231543                                      | 0.017511289                                         | 11.61864407                            |
| 1045.215979                               | 0.566384883                      | 0.033736446                                      | 0.002255138                                         | 38.42581212                            |
| 1206.534783                               | 0.453947368                      | 0.042131905                                      | 0.001253257                                         | 58.1402899                             |
| 519.7166362                               | 0.484499557                      | 0.048283975                                      | 0.003423133                                         | 26.41133455                            |
| 1229.221184                               | 0.248452012                      | 0.071207092                                      | 0.007017707                                         | 91.42990654                            |
| 1660.417004                               | 0.257444908                      | 0.064756923                                      | 0.004209294                                         | 111.9647195                            |
| 3306.386946                               | 0.373856209                      | 0.040828708                                      | 0.00111962                                          | 140.1241259                            |
| 529.0804954                               | 0.578853047                      | 0.036231537                                      | 0.003770904                                         | 23.40557276                            |
| 567.1568627                               | 0.593554163                      | 0.035760029                                      | 0.007606201                                         | 23.70889894                            |
| 353.0460358                               | 0.640983607                      | 0.035707511                                      | 0.007309382                                         | 13.96163683                            |
| 768.6896552                               | 0.526077098                      | 0.036342988                                      | 0.00402282                                          | 33.7262931                             |
| 1347.370518                               | 0.529163739                      | 0.031294918                                      | 0.002071916                                         | 47.13014608                            |
| 175.9405941                               | 0.400793651                      | 0.055386727                                      | 0.011609193                                         | 11.18811881                            |
| 700.7160343                               | 0.609246831                      | 0.034536899                                      | 0.002825012                                         | 28.21664627                            |
| 1502.126954                               | 0.572707736                      | 0.034849408                                      | 0.001367331                                         | 55.72420263                            |
| 46.34615385                               | 0.35862069                       | 0.083579882                                      | 0.040898991                                         | 4.346153846                            |
| 1033.189934                               | 0.310527868                      | 0.069165203                                      | 0.005718623                                         | 72.83095916                            |
| 2163.724084                               | 0.468590212                      | 0.037268034                                      | 0.000697542                                         | 95.62977397                            |
| 268.5664336                               | 0.367609254                      | 0.07039464                                       | 0.015425301                                         | 20.13286713                            |
| 759.9217002                               | 0.576030928                      | 0.031860427                                      | 0.00245062                                          | 28.48322148                            |
| 54.03571429                               | 0.306010929                      | 0.080357143                                      | 0.036533819                                         | 4.5                                    |
| 39.68085106                               | 0.447619048                      | 0.059302852                                      | 0.042354362                                         | 2.787234043                            |
| 1418.157895                               | 0.387169811                      | 0.039315252                                      | 0.003147792                                         | 60.50617284                            |
| 414.0158014                               | 0.627478754                      | 0.032433286                                      | 0.003736446                                         | 14.36794582                            |
| 534.8461538                               | 0.623287671                      | 0.035525139                                      | 0.009791362                                         | 22.62951334                            |
| 1855.973993                               | 0.479462103                      | 0.03372937                                       | 0.001289688                                         | 66.14329424                            |
| 2202.300212                               | 0.405614881                      | 0.043877011                                      | 0.001641939                                         | 103.3303609                            |
| 104.640625                                | 0.505928854                      | 0.047363281                                      | 0.018773352                                         | 6.0625                                 |
| 616.993865                                | 0.536184211                      | 0.034132824                                      | 0.002733715                                         | 22.25460123                            |
| 53.79365079                               | 0.512195122                      | 0.067775258                                      | 0.029039042                                         | 4.26984127                             |
| 128.1172414                               | 0.382585752                      | 0.060642093                                      | 0.017725976                                         | 8.793103448                            |
| 274.6802721                               | 0.364312268                      | 0.054306076                                      | 0.014216145                                         | 15.96598639                            |

| wavelet.LHH_gldzm_HighIntensityLargeDistanceEmphasis | wavelet.LHH_gldzm_SmallDistanceEmphasis | wavelet.LHH_gldzm_SumVariance | wavelet.LHH_gldzm_Homogeneity1 | wavelet.LHH_gldzm_Homogeneity2 |
|------------------------------------------------------|-----------------------------------------|-------------------------------|--------------------------------|--------------------------------|
| 267.010989                                           | 0.975274725                             | 650.6994718                   | 0.321259672                    | 0.232219675                    |
| 661.1798002                                          | 0.971698113                             | 1799.496158                   | 0.322193289                    | 0.242876196                    |
| 1805.477124                                          | 0.933823529                             | 4693.090814                   | 0.184227874                    | 0.100804331                    |
| 589.7104642                                          | 0.959874115                             | 1503.422325                   | 0.276520542                    | 0.189136112                    |
| 282.2873563                                          | 0.961206897                             | 576.3493743                   | 0.278455826                    | 0.18684318                     |
| 823.3687316                                          | 0.949115044                             | 2039.735941                   | 0.254318939                    | 0.162984954                    |
| 1887.474138                                          | 0.864224138                             | 4199.753204                   | 0.166178437                    | 0.087670462                    |
| 1938.972414                                          | 0.937931034                             | 5268.836011                   | 0.22719168                     | 0.139824025                    |
| 370.9075829                                          | 0.975118483                             | 978.2687381                   | 0.2942953                      | 0.201553469                    |
| 1321.980576                                          | 0.981203008                             | 4110.029113                   | 0.258470091                    | 0.169537078                    |
| 1018.935039                                          | 0.954232283                             | 2623.989169                   | 0.219357173                    | 0.132593771                    |
| 1348.774498                                          | 0.959268005                             | 3718.218263                   | 0.225046854                    | 0.14239912                     |
| 1539.543662                                          | 0.978873239                             | 4686.217066                   | 0.255170637                    | 0.167186755                    |
| 490.2394366                                          | 0.961707746                             | 1209.435806                   | 0.268997972                    | 0.180334075                    |
| 307.3303303                                          | 0.968468468                             | 761.5198253                   | 0.331749097                    | 0.241607173                    |
| 229.5436573                                          | 0.969110379                             | 566.0739136                   | 0.512986506                    | 0.458886007                    |
| 572.3163842                                          | 0.891949153                             | 1209.221523                   | 0.263054898                    | 0.170789656                    |
| 394.2968568                                          | 0.981664726                             | 1072.748236                   | 0.336882973                    | 0.251603141                    |
| 422.08                                               | 0.935                                   | 856.5647013                   | 0.256142698                    | 0.167949652                    |
| 1126.646672                                          | 0.981511915                             | 3416.58568                    | 0.313266007                    | 0.231692345                    |
| 524.7920094                                          | 0.962103408                             | 1367.636146                   | 0.37501495                     | 0.296017272                    |
| 2320.585244                                          | 0.931954138                             | 6075.781654                   | 0.217345709                    | 0.132606554                    |
| 87.70327103                                          | 0.977219626                             | 194.7531309                   | 0.516289602                    | 0.458740254                    |
| 1829.825545                                          | 0.887850467                             | 3895.246918                   | 0.188943735                    | 0.106492033                    |
| 2070.541916                                          | 0.952844311                             | 5797.292755                   | 0.249656543                    | 0.164019373                    |
| 602.0783133                                          | 0.968373494                             | 1616.877252                   | 0.28231848                     | 0.192669535                    |
| 1203.065151                                          | 0.961739398                             | 3269.036007                   | 0.272852584                    | 0.184341736                    |
| 1423.719276                                          | 0.983505821                             | 4361.143929                   | 0.2543984                      | 0.167801013                    |
| 2730.069238                                          | 0.980712166                             | 8574.432393                   | 0.243715083                    | 0.162014261                    |
| 1071.552017                                          | 0.976910828                             | 3240.624481                   | 0.369927224                    | 0.299557584                    |
| 1647.909505                                          | 0.984206033                             | 5144.52931                    | 0.244094621                    | 0.156030727                    |
| 528.7580221                                          | 0.985007891                             | 1528.554906                   | 0.379304715                    | 0.300821786                    |
| 570.7911065                                          | 0.977507756                             | 1537.959442                   | 0.2746605                      | 0.187545474                    |
| 1315.69697                                           | 0.931818182                             | 3048.66252                    | 0.208555934                    | 0.124762415                    |
| 917.4027149                                          | 0.955882353                             | 2462.750451                   | 0.198319478                    | 0.112209877                    |
| 802.0336427                                          | 0.966067285                             | 2201.900895                   | 0.298810591                    | 0.211119238                    |
| 2543.294203                                          | 0.981521739                             | 8112.496027                   | 0.270358003                    | 0.184709634                    |
| 585.8788644                                          | 0.970662461                             | 1522.407086                   | 0.286764675                    | 0.203039313                    |
| 620.2464455                                          | 0.921800948                             | 1314.523606                   | 0.262266444                    | 0.170234253                    |
| 1250.94359                                           | 0.984615385                             | 3710.459196                   | 0.243116384                    | 0.159254763                    |
| 2717.941011                                          | 0.934691011                             | 7308.057592                   | 0.264091669                    | 0.174980546                    |
| 620.2716628                                          | 0.971896956                             | 1683.783898                   | 0.298436789                    | 0.210202315                    |
| 411.185422                                           | 0.970268542                             | 1087.389815                   | 0.275374344                    | 0.184718285                    |
| 667.3968804                                          | 0.935008666                             | 1495.602549                   | 0.23675221                     | 0.150262915                    |
| 980.1956929                                          | 0.950842697                             | 2532.04013                    | 0.233049257                    | 0.143662866                    |
| 732.4388778                                          | 0.983466934                             | 2177.874677                   | 0.303373292                    | 0.216115116                    |
| 858.0655301                                          | 0.942461375                             | 2178.14438                    | 0.287795152                    | 0.199348636                    |
| 1054.502793                                          | 0.979050279                             | 3118.740121                   | 0.227496097                    | 0.138886695                    |
| 119.38                                               | 0.94                                    | 192.4663583                   | 0.347032512                    | 0.256331602                    |
| 791.7830508                                          | 0.938983051                             | 1754.152704                   | 0.231336958                    | 0.141509323                    |
| 644.8257235                                          | 0.980707395                             | 1842.664285                   | 0.295383354                    | 0.211555804                    |
| 529.1752809                                          | 0.991573034                             | 1513.235311                   | 0.252276586                    | 0.162298482                    |
| 2189.937585                                          | 0.969248292                             | 6405.746332                   | 0.228166915                    | 0.142818971                    |
| 1070.541209                                          | 0.969093407                             | 3092.235886                   | 0.206389933                    | 0.121846617                    |
| 1239.365095                                          | 0.981945838                             | 3900.005898                   | 0.402192886                    | 0.33635081                     |
| 581.5922131                                          | 0.941598361                             | 1374.917093                   | 0.234725243                    | 0.148381098                    |
| 1175.749153                                          | 0.878601695                             | 2417.011478                   | 0.230941509                    | 0.144396641                    |
| 3767.951662                                          | 0.905966767                             | 9845.900686                   | 0.249213096                    | 0.158550429                    |
| 188.261745                                           | 0.967281879                             | 380.7487494                   | 0.368015259                    | 0.285866694                    |
| 242.3948339                                          | 0.997232472                             | 655.754337                    | 0.377740022                    | 0.296935461                    |
| 231.689847                                           | 0.978094576                             | 552.0188716                   | 0.344844778                    | 0.257018922                    |
| 3056.315893                                          | 0.968410661                             | 9226.375289                   | 0.242426921                    | 0.159983855                    |
| 1035.83499                                           | 0.983101392                             | 3048.565639                   | 0.287730692                    | 0.205861575                    |
| 532.2923777                                          | 0.973549488                             | 1491.281877                   | 0.400150125                    | 0.335824681                    |
| 191.3010753                                          | 0.983870968                             | 446.4047288                   | 0.324981306                    | 0.233437172                    |
| 280.1814093                                          | 0.970764618                             | 670.366749                    | 0.306257029                    | 0.218182691                    |
| 803.1007463                                          | 0.913246269                             | 1796.351053                   | 0.200859244                    | 0.114144777                    |
| 979.8682678                                          | 0.989082969                             | 2972.42929                    | 0.302811224                    | 0.220635056                    |
| 296.4491525                                          | 0.971398305                             | 732.8024938                   | 0.257253305                    | 0.165588493                    |
| 1441.052678                                          | 0.967734855                             | 4047.142254                   | 0.238937547                    | 0.153262281                    |
| 1500.696377                                          | 0.949456522                             | 4143.147969                   | 0.29362262                     | 0.211446715                    |
| 869.0676417                                          | 0.980804388                             | 2520.505211                   | 0.272732968                    | 0.18083814                     |
| 249.1635514                                          | 0.98364486                              | 649.5425784                   | 0.429101731                    | 0.356472432                    |
| 401.3030654                                          | 0.984817814                             | 1122.148949                   | 0.402221714                    | 0.326482381                    |
| 1554.001166                                          | 0.986013986                             | 4958.410888                   | 0.323493669                    | 0.23796148                     |
| 1007.267802                                          | 0.924535604                             | 2404.265694                   | 0.221590585                    | 0.135506142                    |
| 776.3831071                                          | 0.941176471                             | 1861.300874                   | 0.220347567                    | 0.132989761                    |
| 726.0971867                                          | 0.961636829                             | 1891.988728                   | 0.210844739                    | 0.125185231                    |
| 1092.010776                                          | 0.92887931                              | 2580.179687                   | 0.241098041                    | 0.154108341                    |
| 1661.171315                                          | 0.958167331                             | 4807.387979                   | 0.25482575                     | 0.168195801                    |
| 326.3415842                                          | 0.948019802                             | 735.7242777                   | 0.310472206                    | 0.220571676                    |
| 1232.796818                                          | 0.942166463                             | 3235.731455                   | 0.212411955                    | 0.12781491                     |
| 2196.897436                                          | 0.976547842                             | 6874.5954                     | 0.239732953                    | 0.150640391                    |
| 108.8846154                                          | 0.956730769                             | 249.5182932                   | 0.355954188                    | 0.266218297                    |
| 297.8888889                                          | 0.992877493                             | 859.6838817                   | 0.373122526                    | 0.288666349                    |
| 2393.328527                                          | 0.935697584                             | 6537.158148                   | 0.265250594                    | 0.176365539                    |
| 188.4055944                                          | 0.976398601                             | 389.4428824                   | 0.351866691                    | 0.262055776                    |
| 1906.780761                                          | 0.938758389                             | 5106.66339                    | 0.221871039                    | 0.13479                        |
| 124.9821429                                          | 0.986607143                             | 269.2694472                   | 0.40124549                     | 0.322161726                    |
| 138.5531915                                          | 0.936170213                             | 321.0951689                   | 0.326804915                    | 0.237425551                    |
| 1098.097466                                          | 0.969298246                             | 3188.489226                   | 0.332659612                    | 0.255292834                    |
| 1202.96614                                           | 0.974604966                             | 3551.660986                   | 0.201776671                    | 0.116947012                    |
| 684.4709576                                          | 0.934065934                             | 1464.620929                   | 0.213165848                    | 0.124374814                    |
| 2138.465069                                          | 0.979347272                             | 6739.765642                   | 0.277175885                    | 0.195156282                    |
| 1173.651805                                          | 0.974840764                             | 3470.152987                   | 0.320747012                    | 0.239253805                    |
| 417.4296875                                          | 0.923828125                             | 888.2408349                   | 0.266490102                    | 0.175709244                    |
| 1490.25                                              | 0.979294479                             | 4567.414908                   | 0.2370011                      | 0.150577674                    |
| 209.5555556                                          | 0.94047619                              | 458.9533784                   | 0.313579254                    | 0.219447232                    |
| 211.6                                                | 0.953448276                             | 458.9320088                   | 0.329480804                    | 0.238280701                    |
| 265.7312925                                          | 0.974489796                             | 639.22424                     | 0.368248261                    | 0.289253207                    |











| wavelet.LHH_firstorder_Skewness | wavelet.LHH_firstorder_Uniformity | wavelet.LHH_firstorder_MeanAbsoluteDeviation | wavelet.LHH_firstorder_Energy | wavelet.LHH_firstorder_RobustMeanAbsoluteDeviation |
|---------------------------------|-----------------------------------|----------------------------------------------|-------------------------------|----------------------------------------------------|
| 0.148585851                     | 0.08157918                        | 71.75072577                                  | 6294334.634                   | 46.96651076                                        |
| -0.154701757                    | 0.073927271                       | 91.97064032                                  | 35813115.88                   | 53.04174266                                        |
| -0.277813605                    | 0.037896324                       | 166.9138005                                  | 22318788.14                   | 104.8144715                                        |
| -0.024943462                    | 0.064261636                       | 93.54843472                                  | 42267998.99                   | 58.3860264                                         |
| 0.688904212                     | 0.066208363                       | 94.04972139                                  | 5700103.109                   | 60.41429369                                        |
| 0.220965646                     | 0.058974626                       | 105.8306737                                  | 13505267.64                   | 65.04784582                                        |
| 0.247875412                     | 0.023765288                       | 287.2884612                                  | 39417440.33                   | 215.4578525                                        |
| -0.440260344                    | 0.046989853                       | 127.0180582                                  | 29367459.46                   | 81.15237537                                        |
| -0.097831268                    | 0.073490349                       | 79.97820524                                  | 22990871.52                   | 52.6572643                                         |
| -0.089580371                    | 0.049794928                       | 120.905632                                   | 84699292.58                   | 75.45504915                                        |
| -0.095342132                    | 0.033569274                       | 176.9152189                                  | 43546899.82                   | 121.359964                                         |
| -0.0252161                      | 0.038007143                       | 163.3054346                                  | 72685634.94                   | 101.5983376                                        |
| 0.287402679                     | 0.053733649                       | 119.7876355                                  | 65025411.84                   | 69.21667957                                        |
| 0.096347487                     | 0.059835638                       | 98.80237565                                  | 19280720.56                   | 63.44853321                                        |
| -0.043442007                    | 0.088279487                       | 68.07002926                                  | 7666720.751                   | 43.23064715                                        |
| 0.349209186                     | 0.19999012                        | 34.28932827                                  | 21036278.84                   | 16.87780046                                        |
| -0.050444947                    | 0.064026568                       | 92.00237982                                  | 10211776.36                   | 60.80196916                                        |
| -0.125944703                    | 0.084105767                       | 73.0627018                                   | 23730670.29                   | 44.62151106                                        |
| 0.179508019                     | 0.060910948                       | 99.47963199                                  | 10539199.96                   | 61.98315328                                        |
| -0.090213137                    | 0.065521685                       | 103.7257916                                  | 62607887.31                   | 59.66182578                                        |
| 0.038969115                     | 0.105046593                       | 61.09530696                                  | 39770633.34                   | 35.94650036                                        |
| -0.053431835                    | 0.037826528                       | 157.6988013                                  | 76375699.57                   | 101.9032519                                        |
| -0.24026972                     | 0.19059536                        | 30.06749731                                  | 4596640.63                    | 18.71419958                                        |
| 0.093395196                     | 0.032524929                       | 191.8952309                                  | 31784797.89                   | 122.3349588                                        |
| -0.303611657                    | 0.04258783                        | 150.1841855                                  | 55833356.43                   | 88.67867032                                        |
| -0.091416959                    | 0.051532693                       | 112.3276733                                  | 14472840.75                   | 76.62372896                                        |
| 0.568504248                     | 0.053739251                       | 115.8453373                                  | 93344934.54                   | 69.54825618                                        |
| 0.116741236                     | 0.046148287                       | 131.2393504                                  | 50872420.56                   | 83.23471211                                        |
| -0.182379316                    | 0.03246475                        | 192.9648049                                  | 128715355.8                   | 118.0293786                                        |
| -0.05962682                     | 0.099583953                       | 78.15226049                                  | 38536383.02                   | 39.14835161                                        |
| 0.465574343                     | 0.043343877                       | 142.2558379                                  | 125712145.3                   | 86.6698372                                         |
| 0.282976318                     | 0.098667478                       | 64.95525405                                  | 53061889.49                   | 37.48013614                                        |
| 0.299642826                     | 0.06210101                        | 100.5932064                                  | 40431503.58                   | 60.3463654                                         |
| -0.550863514                    | 0.048816568                       | 145.0721793                                  | 4340039.672                   | 83.19213927                                        |
| 0.049444829                     | 0.034965162                       | 172.9155303                                  | 16057543.24                   | 117.5319263                                        |
| 0.081573555                     | 0.073283992                       | 88.01571619                                  | 32437969.86                   | 50.95683752                                        |
| -0.375194553                    | 0.045218461                       | 142.2375644                                  | 122547759.4                   | 83.25051162                                        |
| 0.039497993                     | 0.064588816                       | 98.04146938                                  | 62413281.87                   | 58.72477789                                        |
| -0.092901207                    | 0.056098103                       | 104.2094563                                  | 15650760.06                   | 70.99963766                                        |
| -0.344288443                    | 0.052052843                       | 125.0883385                                  | 33415337.22                   | 73.15348532                                        |
| -0.078119562                    | 0.053717167                       | 117.6716199                                  | 41764891.55                   | 70.89242999                                        |
| 0.350148372                     | 0.073968657                       | 83.92601239                                  | 12779983.77                   | 51.07476918                                        |
| -0.215361344                    | 0.067173955                       | 90.5100709                                   | 24939753.52                   | 55.83954175                                        |
| 0.225980916                     | 0.047578346                       | 127.7994314                                  | 30830106.81                   | 79.12048566                                        |
| 0.113116995                     | 0.049792962                       | 117.1153578                                  | 43940532.24                   | 77.48525914                                        |
| 0.131213894                     | 0.07626334                        | 83.24324362                                  | 31668043.93                   | 49.03085747                                        |
| 0.382304541                     | 0.069195719                       | 89.27159158                                  | 68374713.38                   | 53.39434584                                        |
| -0.087309185                    | 0.04471754                        | 135.2931611                                  | 19071124.28                   | 86.28807992                                        |
| 0.08466016                      | 0.104588995                       | 59.25398968                                  | 775015.9931                   | 39.64479801                                        |
| 0.526645449                     | 0.041128056                       | 145.5254149                                  | 18766045.13                   | 95.33330351                                        |
| 0.133703222                     | 0.070904289                       | 91.82341232                                  | 57912050.13                   | 54.20245664                                        |
| -0.048946038                    | 0.044836525                       | 131.0909012                                  | 23052640.11                   | 90.24708669                                        |
| 0.488185007                     | 0.035272572                       | 177.788649                                   | 229940793.6                   | 107.784509                                         |
| 0.213280283                     | 0.034485128                       | 180.5919309                                  | 33649145.53                   | 115.2096592                                        |
| -0.03273262                     | 0.136377843                       | 62.81875915                                  | 74542447.62                   | 27.84878952                                        |
| 0.439390209                     | 0.050078885                       | 121.2626565                                  | 23717010.22                   | 76.67154042                                        |
| 0.200546981                     | 0.049251141                       | 124.7924782                                  | 65212955.62                   | 75.90240885                                        |
| -0.335752803                    | 0.043296374                       | 145.5412437                                  | 56385953.32                   | 87.56721114                                        |
| 0.482953283                     | 0.096173234                       | 62.33921509                                  | 5763964.333                   | 39.55650981                                        |
| 0.258455775                     | 0.10444096                        | 60.44110469                                  | 6603383.502                   | 35.95530634                                        |
| 0.348076344                     | 0.09176887                        | 63.87944841                                  | 15673662.4                    | 40.93446057                                        |
| -0.196822623                    | 0.040306268                       | 167.5126547                                  | 321596591.6                   | 96.55466371                                        |
| 0.224991438                     | 0.060860276                       | 115.3124189                                  | 89685859.2                    | 63.24405474                                        |
| -0.32602581                     | 0.118077283                       | 72.20846161                                  | 39188457.05                   | 31.87734818                                        |
| -0.279801682                    | 0.090488224                       | 70.64708163                                  | 1963675.204                   | 44.29191852                                        |
| 0.411435594                     | 0.074090859                       | 81.82444742                                  | 19218673.23                   | 50.94033804                                        |
| -0.006025879                    | 0.036744054                       | 162.1678758                                  | 16876247.14                   | 110.0560002                                        |
| 0.033161031                     | 0.068763148                       | 98.51355261                                  | 68506275.93                   | 54.01934004                                        |
| 0.239170149                     | 0.060829697                       | 95.46588713                                  | 6919656.869                   | 63.24237496                                        |
| 0.060732639                     | 0.044016734                       | 141.8413924                                  | 80654259.91                   | 85.35419525                                        |
| -0.326130685                    | 0.069474333                       | 96.10459849                                  | 61409106.11                   | 53.74387198                                        |
| -0.181722278                    | 0.065259944                       | 91.72221164                                  | 17416706.54                   | 57.9728248                                         |
| 0.232336717                     | 0.139811767                       | 45.25425143                                  | 22048424.67                   | 25.95429649                                        |
| 0.146050941                     | 0.126778974                       | 50.99637847                                  | 36832523.01                   | 28.87907412                                        |
| -0.025197098                    | 0.06944537                        | 95.2437133                                   | 179556847.6                   | 53.47125931                                        |
| 0.204931672                     | 0.044096299                       | 134.2527472                                  | 34851878.35                   | 87.76341139                                        |
| 0.065130225                     | 0.040801033                       | 143.4062351                                  | 38579222.8                    | 95.19540114                                        |
| -0.162767553                    | 0.043773179                       | 136.9643046                                  | 19085083.12                   | 91.81621296                                        |
| 0.247706656                     | 0.048178871                       | 125.4199059                                  | 50718940.31                   | 79.2384974                                         |
| -0.244059136                    | 0.041688622                       | 147.0109824                                  | 115871512.4                   | 90.73918028                                        |
| 0.110236837                     | 0.078522613                       | 76.53147965                                  | 5277087.438                   | 48.81732828                                        |
| 0.140538688                     | 0.043969213                       | 138.8850994                                  | 48631313.31                   | 86.0501032                                         |
| -0.394056198                    | 0.044357959                       | 140.9252486                                  | 112394441.6                   | 84.67148228                                        |
| -0.116182677                    | 0.105160523                       | 56.20162656                                  | 765110.9566                   | 37.19585455                                        |
| -0.015560863                    | 0.10786867                        | 54.53441741                                  | 18313469.4                    | 34.71806409                                        |
| -0.097305157                    | 0.050624053                       | 121.0355885                                  | 159061443.9                   | 74.32359705                                        |
| 0.049663972                     | 0.091262944                       | 62.18959412                                  | 5031201.818                   | 41.85412956                                        |
| -0.178090936                    | 0.03901185                        | 156.8761874                                  | 70835589.56                   | 98.7752809                                         |
| 0.423036535                     | 0.107468124                       | 54.98247106                                  | 1035945.293                   | 34.95907869                                        |
| 0.061528012                     | 0.091882086                       | 76.10040242                                  | 1027590.168                   | 48.87744655                                        |
| -0.020238152                    | 0.08421901                        | 90.44560996                                  | 80580333.11                   | 45.06751052                                        |
| -0.065132907                    | 0.037501304                       | 160.7588933                                  | 30063464.69                   | 108.6961311                                        |
| 0.369100616                     | 0.042089683                       | 141.0710315                                  | 34235945.4                    | 94.13820482                                        |
| -0.063626664                    | 0.058473945                       | 121.0388681                                  | 144016795.1                   | 64.53291925                                        |
| 0.239209048                     | 0.079464934                       | 86.32659968                                  | 99649216.07                   | 47.07421649                                        |
| -0.032668818                    | 0.059163555                       | 104.9456091                                  | 4715976.994                   | 67.79146069                                        |
| -0.258727731                    | 0.045250552                       | 139.8649252                                  | 47309250.13                   | 83.13031395                                        |
| -0.57183861                     | 0.088902109                       | 70.36719418                                  | 1022876.64                    | 46.64942489                                        |
| 0.127252613                     | 0.084676381                       | 68.04560064                                  | 2981943.749                   | 44.92767373                                        |
| -0.058484562                    | 0.09746656                        | 67.49340898                                  | 7404828.669                   | 39.25680736                                        |



| wavelet.LHH_firstorder_Entropy | wavelet.LHH_firstorder_StandardDeviation | wavelet.LHH_firstorder_Range | wavelet.LHH_firstorder_Variance | wavelet.LHH_firstorder_10Percentile | wavelet.LHH_firstorder_Kurtosis |
|--------------------------------|------------------------------------------|------------------------------|---------------------------------|-------------------------------------|---------------------------------|
| 3.919870954                    | 94.41635285                              | 758.5386124                  | 8914.447685                     | -114.3844491                        | 4.095708435                     |
| 4.289810637                    | 131.244017                               | 1109.370781                  | 17224.992                       | -167.4069574                        | 4.547124876                     |
| 5.047686256                    | 225.9713557                              | 1625.861657                  | 51063.05358                     | -252.4949474                        | 4.638972955                     |
| 4.328887755                    | 126.6526602                              | 1106.986276                  | 16040.89634                     | -160.0187695                        | 4.14403473                      |
| 4.22946053                     | 125.7697615                              | 781.472801                   | 15818.03291                     | -131.0552914                        | 4.503828604                     |
| 4.451595467                    | 144.8529578                              | 1288.335295                  | 20982.37939                     | -147.4523108                        | 4.97575375                      |
| 5.60016221                     | 341.9043842                              | 1816.759619                  | 116898.608                      | -419.4911555                        | 2.483514476                     |
| 4.730588537                    | 171.1982516                              | 1471.36523                   | 29308.84135                     | -200.7759334                        | 5.17444415                      |
| 4.078334117                    | 105.1524133                              | 839.3896655                  | 11057.03002                     | -120.6913167                        | 4.126158438                     |
| 4.694456903                    | 165.2729543                              | 1650.247814                  | 27315.14943                     | -201.126262                         | 5.017842066                     |
| 5.145254928                    | 224.5560412                              | 1399.835986                  | 50425.41563                     | -350.2481098                        | 3.173052782                     |
| 5.096059455                    | 221.4589369                              | 1665.144229                  | 49044.06071                     | -283.4787981                        | 3.97556437                      |
| 4.666727236                    | 177.0615543                              | 1934.580907                  | 31350.79401                     | -188.3292194                        | 8.050684833                     |
| 4.396789105                    | 131.3218682                              | 936.3830474                  | 17245.43307                     | -164.6819103                        | 3.865679374                     |
| 3.843445203                    | 91.71984214                              | 748.2907101                  | 8412.529443                     | -102.1460023                        | 4.538086311                     |
| 2.911516375                    | 55.02562182                              | 790.3003889                  | 3027.819056                     | -54.29221974                        | 9.191533234                     |
| 4.249605531                    | 120.9429583                              | 892.3029419                  | 14627.19917                     | -146.1100237                        | 4.025115069                     |
| 3.980867845                    | 100.8501552                              | 873.7053287                  | 10170.7538                      | -119.1992426                        | 4.526142091                     |
| 4.394238275                    | 134.5592731                              | 861.7441                     | 18106.19798                     | -158.9132569                        | 4.127644239                     |
| 4.470249965                    | 149.3672563                              | 1460.936507                  | 22310.57726                     | -182.6383705                        | 5.287744155                     |
| 3.730000321                    | 87.25097096                              | 1045.350606                  | 7612.731933                     | -104.2777138                        | 5.821781713                     |
| 5.057610629                    | 210.6928427                              | 2055.246235                  | 44391.47397                     | -260.2790548                        | 4.578414911                     |
| 2.742123095                    | 41.02353371                              | 349.7639459                  | 1682.930318                     | -49.83113496                        | 4.37798072                      |
| 5.257229444                    | 254.7973989                              | 1512.768763                  | 64921.71448                     | -276.8680257                        | 3.353350952                     |
| 4.970556485                    | 215.0206577                              | 1859.133089                  | 46233.88324                     | -243.7150376                        | 6.076076113                     |
| 4.525610557                    | 144.1758372                              | 1074.528086                  | 20786.67203                     | -189.5088863                        | 3.675373149                     |
| 4.632447392                    | 164.0044713                              | 1775.093657                  | 26897.46661                     | -170.9264575                        | 6.269473079                     |
| 4.77912586                     | 180.5682135                              | 1669.310427                  | 32604.87973                     | -249.600281                         | 5.783032243                     |
| 5.341655489                    | 265.8491508                              | 2128.636668                  | 70675.77099                     | -370.2017639                        | 4.535542638                     |
| 4.019133596                    | 123.1176031                              | 1383.774384                  | 15157.94419                     | -129.3540527                        | 7.612768203                     |
| 4.917588089                    | 198.4284431                              | 2262.211403                  | 39373.84704                     | -201.7738896                        | 6.00293158                      |
| 3.820234556                    | 94.59297525                              | 1247.849502                  | 8947.830967                     | -104.8376674                        | 7.450913082                     |
| 4.432263311                    | 140.9985583                              | 1301.313507                  | 19880.59344                     | -153.6385043                        | 5.345115535                     |
| 4.68803197                     | 204.2765173                              | 1198.65418                   | 41728.8955                      | -258.3235867                        | 4.490827004                     |
| 5.065918883                    | 219.7117874                              | 1259.386917                  | 48273.26951                     | -280.0416015                        | 3.071753251                     |
| 4.230799453                    | 126.6796848                              | 1275.572181                  | 16047.74255                     | -132.4531345                        | 6.196288992                     |
| 4.903095539                    | 206.2486236                              | 2259.37056                   | 42538.49475                     | -211.4151017                        | 6.950709596                     |
| 4.397522605                    | 136.3951203                              | 1126.392004                  | 18603.62885                     | -160.8309432                        | 4.46065148                      |
| 4.413780356                    | 133.7548556                              | 1030.498617                  | 17890.36139                     | -195.9626523                        | 3.859851893                     |
| 4.716365544                    | 178.4218687                              | 1545.517836                  | 31834.36321                     | -188.1824905                        | 5.52139863                      |
| 4.626005524                    | 168.0567706                              | 1910.197936                  | 28243.07814                     | -168.373923                         | 7.522465769                     |
| 4.144534286                    | 115.7988276                              | 1096.745245                  | 13409.36846                     | -132.704835                         | 5.089935234                     |
| 4.273256261                    | 123.238805                               | 892.1996858                  | 15187.80306                     | -149.9853688                        | 4.20776954                      |
| 4.7489363                      | 173.4071053                              | 1240.66099                   | 30070.02418                     | -212.6887007                        | 4.249094241                     |
| 4.623950919                    | 152.9327427                              | 1405.141677                  | 23388.4238                      | -181.8529973                        | 3.911055216                     |
| 4.151435321                    | 119.1853341                              | 1203.32995                   | 14205.14387                     | -132.668113                         | 6.510457128                     |
| 4.270248366                    | 126.5981566                              | 1431.3628                    | 16027.09325                     | -140.6774869                        | 6.524643365                     |
| 4.777710947                    | 180.5744376                              | 1502.476904                  | 32607.12751                     | -214.6736685                        | 4.511758145                     |
| 3.516668378                    | 75.98980343                              | 507.60188                    | 5774.450226                     | -102.1389257                        | 4.28392657                      |
| 4.876163942                    | 191.2468839                              | 1321.950267                  | 36575.37059                     | -259.6260222                        | 3.981974875                     |
| 4.299004845                    | 130.0492262                              | 1275.670886                  | 16912.80125                     | -149.9884049                        | 5.280527333                     |
| 4.71234898                     | 165.0045086                              | 1086.645978                  | 27226.48787                     | -239.3095881                        | 3.111212131                     |
| 5.233465716                    | 244.9809004                              | 2457.279656                  | 60015.64155                     | -270.8160559                        | 4.631239625                     |
| 5.168433789                    | 238.5875011                              | 1429.876967                  | 56923.9957                      | -315.313574                         | 3.429799588                     |
| 3.658668924                    | 106.8511379                              | 1611.410627                  | 11417.16568                     | -107.5059319                        | 10.68854125                     |
| 4.665086365                    | 164.2610137                              | 1273.55322                   | 26981.68062                     | -203.0121254                        | 4.574190635                     |
| 4.739568312                    | 172.2196322                              | 1448.534877                  | 29659.60172                     | -186.8076836                        | 4.788403992                     |
| 4.925708218                    | 208.5386466                              | 2437.944515                  | 43488.36712                     | -242.1958002                        | 8.321195485                     |
| 3.724644303                    | 84.14692314                              | 641.1102342                  | 7080.704673                     | -106.0022611                        | 4.710829705                     |
| 3.690984439                    | 86.55796392                              | 830.6543626                  | 7492.281119                     | -92.15942292                        | 6.584503796                     |
| 3.781028478                    | 86.00602106                              | 864.4444303                  | 7397.035658                     | -100.3755244                        | 5.200307465                     |
| 5.152787401                    | 242.2787123                              | 2343.179941                  | 58698.97445                     | -274.8798592                        | 5.731208317                     |
| 4.616519078                    | 170.3425378                              | 1467.263683                  | 29016.58018                     | -191.576347                         | 5.600399624                     |
| 3.833920639                    | 119.5689541                              | 1462.755479                  | 14296.73479                     | -126.5957688                        | 8.193401372                     |
| 3.802038754                    | 95.10767293                              | 550.625019                   | 9045.469451                     | -108.6777479                        | 3.914925261                     |
| 4.125032651                    | 111.1645076                              | 859.4001456                  | 12357.54775                     | -129.394612                         | 4.32449357                      |
| 5.014300008                    | 206.9110228                              | 1144.93148                   | 42812.17136                     | -266.6202779                        | 2.897269473                     |
| 4.400460233                    | 146.364757                               | 1441.650944                  | 21422.6421                      | -154.9147809                        | 6.248873337                     |
| 4.300026742                    | 124.4974428                              | 972.3453907                  | 15499.61327                     | -152.0433523                        | 4.182047111                     |
| 4.916019335                    | 199.8803598                              | 1769.07404                   | 39952.15822                     | -229.2499618                        | 5.629843504                     |
| 4.366637401                    | 142.1158847                              | 1553.683931                  | 20196.92469                     | -152.6374711                        | 6.857397516                     |
| 4.28330079                     | 124.1608798                              | 1205.093792                  | 15415.92407                     | -151.7924664                        | 4.915463131                     |
| 3.314760683                    | 65.31023293                              | 702.6155362                  | 4265.426525                     | -75.91275902                        | 5.599172518                     |
| 3.471764161                    | 74.04984332                              | 862.4346386                  | 5483.379296                     | -79.57434205                        | 5.955718475                     |
| 4.356622118                    | 139.8496702                              | 1663.917938                  | 19557.93026                     | -145.0098997                        | 6.361790568                     |
| 4.794199874                    | 176.6931146                              | 1289.508619                  | 31220.45674                     | -209.3818935                        | 3.899077304                     |
| 4.89125158                     | 185.8228526                              | 1192.330626                  | 34530.13256                     | -236.5644132                        | 3.477950419                     |
| 4.795302805                    | 176.8792585                              | 1106.547579                  | 31286.2721                      | -218.5858577                        | 3.458968181                     |
| 4.732925315                    | 169.5575214                              | 1376.017254                  | 28749.75307                     | -197.5194428                        | 4.570558964                     |
| 4.974798737                    | 201.6845918                              | 1655.860794                  | 40676.67456                     | -231.8495639                        | 4.560532353                     |
| 3.981832235                    | 102.2371268                              | 710.2400566                  | 10452.4301                      | -121.2949013                        | 4.031345677                     |
| 4.878167388                    | 190.4324212                              | 1715.705657                  | 36264.50706                     | -232.9743643                        | 5.043312189                     |
| 4.894800178                    | 200.0123722                              | 2153.57346                   | 40004.94903                     | -229.3168885                        | 6.563266004                     |
| 3.48636151                     | 72.62665256                              | 431.7986269                  | 5274.630662                     | -84.88945735                        | 3.420858702                     |
| 3.563791093                    | 73.47716017                              | 752.3308784                  | 5398.893067                     | -90.59037                           | 4.508852572                     |
| 4.695766941                    | 170.2599133                              | 1975.768207                  | 28988.43809                     | -177.3005489                        | 6.35913282                      |
| 3.708805041                    | 80.27030409                              | 580.5178063                  | 6443.321718                     | -96.69862124                        | 3.453827037                     |
| 5.034599887                    | 213.3652567                              | 1731.671819                  | 45524.73276                     | -263.7406628                        | 5.01290238                      |
| 3.503971931                    | 73.93313044                              | 507.5740409                  | 5466.107777                     | -71.70868129                        | 4.581918108                     |
| 3.802716617                    | 98.6346023                               | 499.7545698                  | 9728.784771                     | -118.3491127                        | 3.46582245                      |
| 4.238494123                    | 142.3092346                              | 1624.866965                  | 20251.91826                     | -148.3704824                        | 7.34133226                      |
| 5.018448395                    | 206.0120244                              | 1481.9032                    | 42440.9542                      | -263.0518406                        | 3.553242883                     |
| 4.847774075                    | 182.5042251                              | 1212.671137                  | 33307.79217                     | -223.9791767                        | 3.654864377                     |
| 4.681211789                    | 187.591262                               | 2201.289213                  | 35190.48158                     | -196.809455                         | 8.430201108                     |
| 4.207683164                    | 130.9665485                              | 1674.735751                  | 17152.23682                     | -132.6613552                        | 8.231747903                     |
| 4.383322128                    | 136.5289362                              | 742.7737529                  | 18640.15042                     | -182.3103056                        | 3.273661842                     |
| 4.879156602                    | 196.9813217                              | 1608.114623                  | 38801.6411                      | -247.5377236                        | 5.13342471                      |
| 3.759635023                    | 91.1736637                               | 476.7485788                  | 8312.636953                     | -121.092182                         | 3.46285675                      |
| 3.854717035                    | 88.69808287                              | 595.0155344                  | 7867.349904                     | -109.1170847                        | 3.726483268                     |
| 3.841542129                    | 95.78485921                              | 687.0450055                  | 9174.739253                     | -113.5683046                        | 4.623128966                     |

| wavelet.LHH_firstorder_Mean | wavelet.LHH_glrIm_ShortRunLowGrayLevelEmphasis | wavelet.LHH_glrIm_GrayLevelVariance | wavelet.LHH_glrIm_LowGrayLevelRunEmphasis | wavelet.LHH_glrIm_GrayLevelNonUniformityNormalized |
|-----------------------------|------------------------------------------------|-------------------------------------|-------------------------------------------|----------------------------------------------------|
| 1.020031687                 | 0.007790675                                    | 14.96055365                         | 0.008074536                               | 0.079046248                                        |
| -4.209687532                | 0.002823823                                    | 29.72869994                         | 0.002949533                               | 0.066665418                                        |
| -19.04535469                | 0.00349126                                     | 82.72729457                         | 0.003506846                               | 0.03754621                                         |
| -0.299984852                | 0.003529616                                    | 26.82122864                         | 0.003635921                               | 0.061753097                                        |
| 7.726035934                 | 0.012470397                                    | 26.07979476                         | 0.012789704                               | 0.064804481                                        |
| 4.598615182                 | 0.003631334                                    | 34.91031527                         | 0.003698197                               | 0.057480609                                        |
| -8.190869943                | 0.004746078                                    | 188.749101                          | 0.004778283                               | 0.02355234                                         |
| -0.020558748                | 0.001802878                                    | 48.11560475                         | 0.001824989                               | 0.046225743                                        |
| 1.261048167                 | 0.005099496                                    | 18.24063686                         | 0.005275666                               | 0.071796552                                        |
| -4.984147153                | 0.001988621                                    | 44.98258215                         | 0.002022971                               | 0.048530353                                        |
| -47.23402704                | 0.005002092                                    | 81.86929984                         | 0.005061808                               | 0.033250343                                        |
| 1.255746369                 | 0.00228248                                     | 80.62314531                         | 0.00232226                                | 0.036860826                                        |
| -1.365127941                | 0.001451713                                    | 52.38587915                         | 0.00148268                                | 0.05213883                                         |
| 0.54031499                  | 0.004816086                                    | 28.62237716                         | 0.004939082                               | 0.057979018                                        |
| 1.786161199                 | 0.00667931                                     | 14.03605366                         | 0.006934994                               | 0.085363892                                        |
| 0.539214466                 | 0.006100631                                    | 5.735673256                         | 0.00682521                                | 0.175552904                                        |
| 1.689059247                 | 0.005431196                                    | 23.99042662                         | 0.005540166                               | 0.06255005                                         |
| -2.312655793                | 0.004111386                                    | 17.3197048                          | 0.004311497                               | 0.079196935                                        |
| -1.546935438                | 0.010618264                                    | 30.07462762                         | 0.010938241                               | 0.05938305                                         |
| -6.434255781                | 0.001573398                                    | 38.13044503                         | 0.001635774                               | 0.060223776                                        |
| 0.574089812                 | 0.002925656                                    | 13.3326841                          | 0.003112509                               | 0.095137256                                        |
| -3.605901194                | 0.001302799                                    | 72.83525321                         | 0.001322544                               | 0.036989289                                        |
| -0.451990473                | 0.016241855                                    | 3.124788329                         | 0.018065836                               | 0.175264313                                        |
| 34.04330217                 | 0.003586336                                    | 106.1039046                         | 0.003612368                               | 0.03192997                                         |
| -11.80408328                | 0.002679183                                    | 76.52135387                         | 0.00270303                                | 0.041401313                                        |
| -8.219814976                | 0.004533361                                    | 34.28765938                         | 0.004630923                               | 0.050713984                                        |
| 5.842599793                 | 0.001598743                                    | 44.92648013                         | 0.001650412                               | 0.052090118                                        |
| -53.81229106                | 0.001800057                                    | 53.69468267                         | 0.001832898                               | 0.045366335                                        |
| -47.44234607                | 0.001285953                                    | 116.301209                          | 0.00130254                                | 0.031357399                                        |
| 1.386811606                 | 0.001704567                                    | 26.86759347                         | 0.00179696                                | 0.085447047                                        |
| 13.06558499                 | 0.001487305                                    | 64.89830127                         | 0.001512717                               | 0.042578341                                        |
| 0.459461718                 | 0.002669278                                    | 15.47052746                         | 0.002848276                               | 0.091898433                                        |
| 2.64817744                  | 0.004878252                                    | 33.36321737                         | 0.004988031                               | 0.05966696                                         |
| -1.501729308                | 0.012609905                                    | 68.01305063                         | 0.012644763                               | 0.048222513                                        |
| -9.634550857                | 0.00645136                                     | 78.25178959                         | 0.006533278                               | 0.034667193                                        |
| 3.264716232                 | 0.002442767                                    | 27.01931374                         | 0.002523518                               | 0.070008442                                        |
| -3.579192135                | 0.000884859                                    | 70.80287607                         | 0.000905361                               | 0.044074673                                        |
| 2.232112756                 | 0.004084367                                    | 31.27347113                         | 0.004218928                               | 0.060682108                                        |
| -29.20725663                | 0.006951342                                    | 29.31066453                         | 0.007058738                               | 0.055373612                                        |
| 4.483866204                 | 0.002554145                                    | 52.99831983                         | 0.002593382                               | 0.049973428                                        |
| -9.555748248                | 0.001236907                                    | 47.1620306                          | 0.001258489                               | 0.052246264                                        |
| 0.947531997                 | 0.003303068                                    | 22.47955778                         | 0.00340375                                | 0.071295642                                        |
| -0.917050604                | 0.006229714                                    | 25.19366059                         | 0.00637291                                | 0.065109147                                        |
| -2.851105696                | 0.005611584                                    | 49.33692722                         | 0.005724055                               | 0.04665712                                         |
| -3.015079276                | 0.002145105                                    | 38.42813711                         | 0.002192682                               | 0.048920591                                        |
| -2.918968078                | 0.002426434                                    | 23.86581934                         | 0.002508004                               | 0.073300339                                        |
| 0.857056149                 | 0.002233782                                    | 26.94624923                         | 0.002311052                               | 0.066604863                                        |
| -10.24309493                | 0.004678801                                    | 53.1343704                          | 0.004823241                               | 0.044154738                                        |
| 3.041581035                 | 0.037078558                                    | 9.576644472                         | 0.038470899                               | 0.10241761                                         |
| -34.39871389                | 0.005361805                                    | 59.52803983                         | 0.00543531                                | 0.040746035                                        |
| 0.874526718                 | 0.002817222                                    | 28.69030396                         | 0.002917877                               | 0.066199451                                        |
| -25.46625999                | 0.004639862                                    | 44.28929514                         | 0.004748162                               | 0.044375681                                        |
| 12.74872628                 | 0.000964952                                    | 98.48650833                         | 0.000986077                               | 0.034463776                                        |
| 3.457273883                 | 0.003501881                                    | 92.50974069                         | 0.003540008                               | 0.033908208                                        |
| -3.235265838                | 0.001071726                                    | 20.47943698                         | 0.001149872                               | 0.119966478                                        |
| 0.358470676                 | 0.006268295                                    | 44.39354281                         | 0.006445486                               | 0.048907474                                        |
| 8.790230197                 | 0.002541148                                    | 49.06564112                         | 0.00259573                                | 0.047921139                                        |
| -10.96625776                | 0.00125372                                     | 71.82681246                         | 0.001267864                               | 0.042429957                                        |
| 0.576706326                 | 0.012084758                                    | 12.22307706                         | 0.012688841                               | 0.090071026                                        |
| 1.745380285                 | 0.007794779                                    | 12.96913397                         | 0.008186986                               | 0.098059919                                        |
| 0.982105822                 | 0.007743571                                    | 12.49682322                         | 0.008119209                               | 0.08847708                                         |
| -2.821497304                | 0.000682002                                    | 97.2728378                          | 0.000697909                               | 0.038610743                                        |
| 2.823070818                 | 0.002166234                                    | 48.79967173                         | 0.002228112                               | 0.056813669                                        |
| -7.26327433                 | 0.004034337                                    | 25.87911411                         | 0.00425876                                | 0.10139826                                         |
| -1.930035991                | 0.01698079                                     | 15.06892465                         | 0.017415932                               | 0.086982495                                        |
| 4.200510068                 | 0.009835338                                    | 20.802333                           | 0.010097936                               | 0.071153061                                        |
| -4.576376051                | 0.006842294                                    | 69.62857674                         | 0.006901768                               | 0.036309345                                        |
| -2.378688562                | 0.001762915                                    | 36.38680379                         | 0.001828498                               | 0.064864536                                        |
| -3.913111513                | 0.011898842                                    | 25.6910641                          | 0.012075328                               | 0.059662311                                        |
| -12.42520612                | 0.001739427                                    | 66.08868031                         | 0.001770948                               | 0.042965682                                        |
| -1.854498691                | 0.001391999                                    | 34.07397556                         | 0.001437277                               | 0.065336057                                        |
| -3.27757378                 | 0.002409921                                    | 25.6571434                          | 0.002469623                               | 0.063670425                                        |
| 0.953686666                 | 0.005185547                                    | 7.620545373                         | 0.005634504                               | 0.127400107                                        |
| 0.956752221                 | 0.003177898                                    | 9.595572758                         | 0.003438318                               | 0.116509661                                        |
| -1.280312053                | 0.000859519                                    | 33.00206855                         | 0.000902702                               | 0.066208536                                        |
| 2.970679275                 | 0.003785686                                    | 51.25422674                         | 0.003893834                               | 0.043305036                                        |
| -2.848726188                | 0.007076483                                    | 56.24231633                         | 0.007146959                               | 0.040345123                                        |
| 0.865684218                 | 0.005627845                                    | 51.14267568                         | 0.005685698                               | 0.042981204                                        |
| 1.57501459                  | 0.002937164                                    | 47.58900192                         | 0.002993272                               | 0.046876087                                        |
| 6.094148168                 | 0.001524912                                    | 67.07754162                         | 0.001556433                               | 0.040634674                                        |
| -4.240457776                | 0.007710668                                    | 17.33626854                         | 0.007940061                               | 0.076805445                                        |
| 0.674089651                 | 0.002269703                                    | 59.51095924                         | 0.002300941                               | 0.043187652                                        |
| -15.8410792                 | 0.001034103                                    | 65.67895021                         | 0.001051477                               | 0.043579595                                        |
| 1.413019903                 | 0.024431177                                    | 8.728025839                         | 0.025071233                               | 0.103924414                                        |
| -1.310418499                | 0.004278922                                    | 9.262997158                         | 0.004531616                               | 0.102910138                                        |
| 7.653433082                 | 0.0007848                                      | 48.04041304                         | 0.000809162                               | 0.049465813                                        |
| 4.849604566                 | 0.011125466                                    | 10.94559604                         | 0.011630581                               | 0.087978733                                        |
| -10.80533934                | 0.001792733                                    | 74.72170994                         | 0.001816865                               | 0.038474497                                        |
| 13.95691455                 | 0.019391875                                    | 9.342398093                         | 0.020137653                               | 0.103234783                                        |
| 7.601859001                 | 0.035681107                                    | 16.33805625                         | 0.036164517                               | 0.088133583                                        |
| -4.456865687                | 0.001945193                                    | 35.20381863                         | 0.002021266                               | 0.075750894                                        |
| -11.91037285                | 0.002813715                                    | 69.02703372                         | 0.002841266                               | 0.037155419                                        |
| -13.82663857                | 0.007622669                                    | 54.40140275                         | 0.007708791                               | 0.041549996                                        |
| -4.631281023                | 0.000922825                                    | 59.75155963                         | 0.000950462                               | 0.054874568                                        |
| 3.302654268                 | 0.001433028                                    | 29.34513615                         | 0.001506866                               | 0.073779434                                        |
| 0.273594937                 | 0.011977005                                    | 30.78976254                         | 0.012142769                               | 0.057392177                                        |
| -10.19765799                | 0.001879998                                    | 63.90582239                         | 0.001908795                               | 0.044096727                                        |
| -1.852914404                | 0.019252039                                    | 13.57227299                         | 0.019530928                               | 0.087055969                                        |
| 0.758652598                 | 0.011981667                                    | 13.30335517                         | 0.012379691                               | 0.082695106                                        |
| -1.004384637                | 0.010279757                                    | 15.90738499                         | 0.010753882                               | 0.088963057                                        |

| wavelet.LHH_glrIm_RunVariance | wavelet.LHH_glrIm_GrayLevelNonUniformity | wavelet.LHH_glrIm_LongRunEmphasis | wavelet.LHH_glrIm_ShortRunHighGrayLevelEmphasis | wavelet.LHH_glrIm_RunLengthNonUniformity |
|-------------------------------|------------------------------------------|-----------------------------------|-------------------------------------------------|------------------------------------------|
| 0.080493911                   | 51.93363422                              | 1.235830397                       | 215.2245293                                     | 572.2595023                              |
| 0.124471596                   | 126.3149924                              | 1.328804155                       | 538.6164714                                     | 1606.957751                              |
| 0.026774922                   | 15.876558                                | 1.080513436                       | 1405.752832                                     | 401.6274936                              |
| 0.074350243                   | 152.8754528                              | 1.207822162                       | 467.7247058                                     | 2202.057064                              |
| 0.05554113                    | 22.07263839                              | 1.167021002                       | 10.2636855                                      | 307.150009                               |
| 0.055726573                   | 35.08104212                              | 1.164253838                       | 621.8984425                                     | 553.6456674                              |
| 0.03086002                    | 7.707614118                              | 1.092601659                       | 1335.585141                                     | 309.0326676                              |
| 0.048009194                   | 44.35399149                              | 1.139325605                       | 1482.242696                                     | 883.0311576                              |
| 0.073191899                   | 139.8399549                              | 1.213284049                       | 311.062693                                      | 1718.219068                              |
| 0.060612705                   | 142.6130185                              | 1.1727371                         | 1174.311896                                     | 2659.175531                              |
| 0.042324368                   | 26.43919188                              | 1.124682313                       | 818.8732767                                     | 736.8941181                              |
| 0.052546244                   | 52.11744548                              | 1.151776624                       | 1102.074587                                     | 1291.657823                              |
| 0.060346274                   | 102.4062062                              | 1.176110313                       | 1325.613852                                     | 1769.095658                              |
| 0.065298339                   | 61.22460729                              | 1.187319814                       | 394.3259538                                     | 947.2582565                              |
| 0.087933254                   | 72.12398386                              | 1.250864396                       | 242.8868836                                     | 732.4078792                              |
| 0.293557496                   | 1010.453478                              | 1.763416352                       | 165.4510951                                     | 4137.547518                              |
| 0.059573215                   | 41.41481474                              | 1.17301554                        | 390.7119072                                     | 598.7058276                              |
| 0.111399587                   | 168.8286639                              | 1.310015101                       | 333.7383257                                     | 1806.033718                              |
| 0.059012168                   | 32.74755958                              | 1.17473417                        | 289.1557796                                     | 497.286617                               |
| 0.120551778                   | 155.1443947                              | 1.306975731                       | 957.8371845                                     | 2222.738299                              |
| 0.154267255                   | 444.949194                               | 1.403938286                       | 402.9284153                                     | 3841.332512                              |
| 0.048293586                   | 60.94174503                              | 1.139091123                       | 1729.852631                                     | 1517.240507                              |
| 0.26313609                    | 400.4309058                              | 1.698623342                       | 66.12177018                                     | 1668.935651                              |
| 0.033645414                   | 14.89246344                              | 1.097627108                       | 1163.098856                                     | 439.5718265                              |
| 0.056339548                   | 47.41814255                              | 1.162684857                       | 1617.846169                                     | 1041.024003                              |
| 0.069756847                   | 33.14775526                              | 1.199326588                       | 501.4938021                                     | 583.625714                               |
| 0.071329987                   | 169.667855                               | 1.204361867                       | 947.5438067                                     | 2893.031056                              |
| 0.055624312                   | 61.81624528                              | 1.162655527                       | 1257.484513                                     | 1236.970889                              |
| 0.058718477                   | 52.67227127                              | 1.164870758                       | 2389.507221                                     | 1531.760329                              |
| 0.18903292                    | 191.8894933                              | 1.475454013                       | 883.9363501                                     | 1813.908187                              |
| 0.052023635                   | 129.2047008                              | 1.150585668                       | 1462.208785                                     | 2775.347731                              |
| 0.140493751                   | 490.3989633                              | 1.379327276                       | 444.5059889                                     | 4408.069025                              |
| 0.07317538                    | 113.9665037                              | 1.20760394                        | 479.7037005                                     | 1698.026776                              |
| 0.035481648                   | 4.845399848                              | 1.108589574                       | 854.1076049                                     | 93.86402348                              |
| 0.033253051                   | 11.17105779                              | 1.095117417                       | 797.2435827                                     | 304.3159907                              |
| 0.084851944                   | 131.7907012                              | 1.237935709                       | 651.176892                                      | 1650.436146                              |
| 0.072287408                   | 119.4498791                              | 1.202811673                       | 2215.548635                                     | 2418.91638                               |
| 0.087980371                   | 189.9023331                              | 1.237849581                       | 474.8672872                                     | 2756.653733                              |
| 0.058592461                   | 43.89089971                              | 1.169136016                       | 426.5360237                                     | 717.4104938                              |
| 0.059999371                   | 49.78064399                              | 1.170510048                       | 1082.182187                                     | 903.4597948                              |
| 0.06288748                    | 72.70607501                              | 1.1852946                         | 2000.55429                                      | 1245.022835                              |
| 0.074918125                   | 63.71115285                              | 1.213454529                       | 508.8629659                                     | 791.6548299                              |
| 0.067368936                   | 101.0331386                              | 1.188327135                       | 551.1352929                                     | 1396.645361                              |
| 0.048675939                   | 45.72411922                              | 1.143121878                       | 490.8966405                                     | 898.5544614                              |
| 0.047274962                   | 87.94735574                              | 1.139107908                       | 764.3239987                                     | 1652.071135                              |
| 0.080162666                   | 152.5905129                              | 1.227007676                       | 637.5034633                                     | 1831.887703                              |
| 0.077106231                   | 265.9752677                              | 1.218956123                       | 648.1796371                                     | 3524.483251                              |
| 0.040148766                   | 24.77126678                              | 1.121132983                       | 934.2159518                                     | 520.2549606                              |
| 0.070641825                   | 12.8878552                               | 1.206940111                       | 79.13293275                                     | 111.6075359                              |
| 0.040901019                   | 19.46758637                              | 1.123329225                       | 579.2835025                                     | 441.8717634                              |
| 0.098836154                   | 210.3515208                              | 1.262511212                       | 554.5591657                                     | 2778.339411                              |
| 0.058583497                   | 34.9218556                               | 1.164116518                       | 488.7761862                                     | 717.4529593                              |
| 0.050305809                   | 125.8560308                              | 1.145734406                       | 1807.827485                                     | 3347.276156                              |
| 0.041447844                   | 19.32782306                              | 1.117112746                       | 946.1073426                                     | 532.2368959                              |
| 0.181979755                   | 690.2318808                              | 1.476273052                       | 1035.338948                                     | 4601.403864                              |
| 0.049325522                   | 41.09372606                              | 1.144400974                       | 452.4251459                                     | 770.1967894                              |
| 0.052074838                   | 100.2354789                              | 1.152750377                       | 745.2691842                                     | 1909.008773                              |
| 0.053871337                   | 52.19861801                              | 1.159294437                       | 2682.084668                                     | 1116.790357                              |
| 0.127286255                   | 66.51240389                              | 1.344469474                       | 135.9950679                                     | 619.6114098                              |
| 0.127915667                   | 78.03373895                              | 1.356889127                       | 209.624426                                      | 658.6897161                              |
| 0.100503292                   | 172.4585331                              | 1.283739052                       | 184.6174134                                     | 1668.841153                              |
| 0.062311185                   | 200.7377448                              | 1.173818101                       | 2543.436231                                     | 4712.217365                              |
| 0.088041379                   | 163.9895716                              | 1.236273328                       | 885.4559884                                     | 2547.876158                              |
| 0.215830503                   | 240.6349166                              | 1.547797404                       | 430.4167986                                     | 1861.821925                              |
| 0.073252337                   | 17.65899315                              | 1.218042042                       | 161.0366912                                     | 178.647613                               |
| 0.078235173                   | 103.2979597                              | 1.224473354                       | 225.4403687                                     | 1278.291694                              |
| 0.030103092                   | 13.89811311                              | 1.090152537                       | 601.4198261                                     | 361.6272998                              |
| 0.097333745                   | 192.378044                               | 1.261620846                       | 857.0570008                                     | 2588.179658                              |
| 0.052208657                   | 25.34430203                              | 1.155832436                       | 252.2236635                                     | 386.3821108                              |
| 0.052774758                   | 82.52770108                              | 1.149525103                       | 1184.196492                                     | 1760.681033                              |
| 0.089803593                   | 184.6366646                              | 1.249079068                       | 1157.003159                                     | 2469.37499                               |
| 0.062142359                   | 67.9654276                               | 1.182410212                       | 744.9734416                                     | 958.6245055                              |
| 0.181325922                   | 578.0210088                              | 1.483554845                       | 200.0602369                                     | 3590.614136                              |
| 0.166678384                   | 692.1652601                              | 1.449156291                       | 324.4551641                                     | 4765.901785                              |
| 0.099126266                   | 560.2432786                              | 1.27745028                        | 1354.45814                                      | 7268.218299                              |
| 0.046752022                   | 46.28952699                              | 1.137460945                       | 737.4723709                                     | 983.271721                               |
| 0.044314766                   | 43.24682374                              | 1.130661115                       | 584.7089222                                     | 989.5934873                              |
| 0.037368183                   | 25.30742281                              | 1.111299167                       | 588.2608229                                     | 549.2627965                              |
| 0.05879942                    | 78.52994926                              | 1.168627195                       | 780.7368064                                     | 1518.99523                               |
| 0.058573356                   | 109.7937619                              | 1.168938339                       | 1364.591248                                     | 2446.546777                              |
| 0.072915086                   | 36.25848666                              | 1.214133898                       | 239.8568139                                     | 416.2969123                              |
| 0.039932752                   | 55.79983933                              | 1.117774247                       | 963.6810789                                     | 1202.118902                              |
| 0.050117271                   | 116.4389427                              | 1.142498392                       | 1925.342317                                     | 2457.943773                              |
| 0.070942533                   | 14.06428774                              | 1.220973873                       | 93.44818044                                     | 117.9571052                              |
| 0.109738927                   | 318.532811                               | 1.31140084                        | 261.6729618                                     | 2608.743749                              |
| 0.066480241                   | 255.4259601                              | 1.191902815                       | 1800.817342                                     | 4615.406809                              |
| 0.09735052                    | 63.12532808                              | 1.274526192                       | 140.3710586                                     | 616.7260375                              |
| 0.044360518                   | 57.23379185                              | 1.13323393                        | 1477.49668                                      | 1368.084881                              |
| 0.111149833                   | 17.237845                                | 1.318037976                       | 104.1242756                                     | 140.9621247                              |
| 0.06430479                    | 8.687293337                              | 1.202024374                       | 125.3233369                                     | 86.84594996                              |
| 0.137441074                   | 272.8155852                              | 1.359043201                       | 890.8820893                                     | 3017.64107                               |
| 0.034465457                   | 25.38023888                              | 1.103042839                       | 1068.786037                                     | 640.0206659                              |
| 0.03993506                    | 40.95381619                              | 1.11557829                        | 482.0345449                                     | 919.3427149                              |
| 0.087388025                   | 209.3779128                              | 1.238317414                       | 1845.22372                                      | 3357.704327                              |
| 0.11095691                    | 393.4543493                              | 1.298434913                       | 972.1307265                                     | 4569.72547                               |
| 0.062015746                   | 13.73102821                              | 1.1816653                         | 290.1363837                                     | 214.8253186                              |
| 0.053413729                   | 51.09663781                              | 1.155541954                       | 1317.017893                                     | 1055.859685                              |
| 0.047368136                   | 10.19979467                              | 1.150424937                       | 160.5001485                                     | 106.1040756                              |
| 0.081324642                   | 29.20541792                              | 1.236160753                       | 162.8933979                                     | 308.7898216                              |
| 0.135926691                   | 65.02333323                              | 1.360105861                       | 210.2038142                                     | 612.4683209                              |

| wavelet.LHH_glrIm_ShortRunEmphasis | wavelet.LHH_glrIm_LongRunHighGrayLevelEmphasis | wavelet.LHH_glrIm_RunPercentage | wavelet.LHH_glrIm_LongRunLowGrayLevelEmphasis | wavelet.LHH_glrIm_RunEntropy |
|------------------------------------|------------------------------------------------|---------------------------------|-----------------------------------------------|------------------------------|
| 0.947321845                        | 275.7827001                                    | 0.930594901                     | 0.00934568                                    | 4.302810235                  |
| 0.936407562                        | 754.8518062                                    | 0.911966223                     | 0.00358885                                    | 4.784474905                  |
| 0.980482639                        | 1544.968238                                    | 0.974299894                     | 0.003570848                                   | 5.187580741                  |
| 0.953507025                        | 585.7464127                                    | 0.939483287                     | 0.004126291                                   | 4.685388007                  |
| 0.960636439                        | 248.0801426                                    | 0.948789372                     | 0.01412581                                    | 4.506760689                  |
| 0.962285961                        | 743.5024245                                    | 0.950233281                     | 0.003991368                                   | 4.738202343                  |
| 0.977926883                        | 1469.650544                                    | 0.971011185                     | 0.004914276                                   | 5.724680726                  |
| 0.968277235                        | 1741.185663                                    | 0.957546446                     | 0.001921973                                   | 4.976861986                  |
| 0.952190259                        | 393.7257869                                    | 0.936877937                     | 0.006058476                                   | 4.443564877                  |
| 0.961804364                        | 1427.998274                                    | 0.948527586                     | 0.002177388                                   | 5.004182052                  |
| 0.970947231                        | 946.9711911                                    | 0.961491954                     | 0.005314234                                   | 5.356412079                  |
| 0.965570912                        | 1306.056051                                    | 0.954012225                     | 0.002486674                                   | 5.36821455                   |
| 0.960066591                        | 1619.055025                                    | 0.946999481                     | 0.001618672                                   | 4.987214338                  |
| 0.958430011                        | 482.9765952                                    | 0.944475024                     | 0.005495323                                   | 4.715165408                  |
| 0.94551081                         | 319.0451313                                    | 0.927467702                     | 0.008098367                                   | 4.245476038                  |
| 0.871544313                        | 328.2686826                                    | 0.827628971                     | 0.011111251                                   | 3.806944486                  |
| 0.961155346                        | 475.6821695                                    | 0.948534274                     | 0.00602508                                    | 4.538010161                  |
| 0.936154037                        | 463.6912241                                    | 0.914071777                     | 0.005275722                                   | 4.458504571                  |
| 0.960028698                        | 349.7404391                                    | 0.947528417                     | 0.012276748                                   | 4.682649547                  |
| 0.94278697                         | 1316.54004                                     | 0.91920468                      | 0.001965622                                   | 4.928471361                  |
| 0.92411896                         | 604.643707                                     | 0.895173165                     | 0.004104355                                   | 4.307292543                  |
| 0.968492622                        | 2022.196339                                    | 0.957826476                     | 0.001409571                                   | 5.309604791                  |
| 0.877737273                        | 125.5622495                                    | 0.836408191                     | 0.028431254                                   | 3.552274988                  |
| 0.977426763                        | 1292.219814                                    | 0.969614585                     | 0.003723851                                   | 5.419683353                  |
| 0.963503628                        | 1945.380063                                    | 0.951124457                     | 0.002809123                                   | 5.255023579                  |
| 0.956335112                        | 629.3357715                                    | 0.941698071                     | 0.005069794                                   | 4.836557394                  |
| 0.954816341                        | 1182.910507                                    | 0.939699942                     | 0.001882942                                   | 4.992418206                  |
| 0.962990461                        | 1508.319048                                    | 0.950829352                     | 0.001976299                                   | 5.064759879                  |
| 0.964354307                        | 2876.909318                                    | 0.951336282                     | 0.001378635                                   | 5.619518449                  |
| 0.91724785                         | 1403.10055                                     | 0.882862055                     | 0.002323749                                   | 4.664417072                  |
| 0.965874759                        | 1729.926234                                    | 0.954484961                     | 0.001624764                                   | 5.196846444                  |
| 0.926061273                        | 654.8313563                                    | 0.89964976                      | 0.003747728                                   | 4.378671979                  |
| 0.954865945                        | 596.7485976                                    | 0.939422604                     | 0.005490703                                   | 4.787765494                  |
| 0.973715941                        | 973.2721066                                    | 0.965976331                     | 0.012787015                                   | 4.810107572                  |
| 0.978240818                        | 886.6046155                                    | 0.970574606                     | 0.006873222                                   | 5.206116216                  |
| 0.949452437                        | 840.7050496                                    | 0.931835491                     | 0.002903379                                   | 4.62840544                   |
| 0.956358598                        | 2770.252005                                    | 0.940998932                     | 0.001000549                                   | 5.248871896                  |
| 0.951349953                        | 607.6267444                                    | 0.932938856                     | 0.004855292                                   | 4.790974413                  |
| 0.961914259                        | 515.4423991                                    | 0.949239982                     | 0.00752999                                    | 4.69655961                   |
| 0.96246634                         | 1299.838793                                    | 0.949475691                     | 0.002770662                                   | 5.008339496                  |
| 0.957630374                        | 2460.124873                                    | 0.944108131                     | 0.001352807                                   | 4.954828125                  |
| 0.953565388                        | 637.3743589                                    | 0.937866558                     | 0.003864063                                   | 4.499128225                  |
| 0.959478997                        | 433.7105927                                    | 0.945048253                     | 0.007022817                                   | 4.595641616                  |
| 0.966935303                        | 574.8557821                                    | 0.956097561                     | 0.006200524                                   | 5.004435477                  |
| 0.967793545                        | 893.4314361                                    | 0.957278611                     | 0.002398094                                   | 4.883214197                  |
| 0.950957914                        | 815.0245549                                    | 0.934263223                     | 0.002883509                                   | 4.537309829                  |
| 0.952321368                        | 823.2465687                                    | 0.936059721                     | 0.002664488                                   | 4.651571653                  |
| 0.971115355                        | 1069.114312                                    | 0.962264151                     | 0.005406588                                   | 4.989340978                  |
| 0.953604941                        | 99.06176218                                    | 0.939150402                     | 0.044293574                                   | 3.796610847                  |
| 0.970435263                        | 662.2017288                                    | 0.961306299                     | 0.005747135                                   | 5.081608384                  |
| 0.948161539                        | 728.3079148                                    | 0.927794752                     | 0.003424392                                   | 4.719128158                  |
| 0.964435124                        | 583.7553147                                    | 0.951539392                     | 0.005246138                                   | 4.972995845                  |
| 0.96682093                         | 2121.054424                                    | 0.955690214                     | 0.001078303                                   | 5.506470055                  |
| 0.973763965                        | 1080.970902                                    | 0.964467005                     | 0.003707388                                   | 5.355975242                  |
| 0.913292332                        | 1668.585142                                    | 0.880918407                     | 0.00157795                                    | 4.337674392                  |
| 0.966773835                        | 527.0685887                                    | 0.955893935                     | 0.007184669                                   | 4.917071418                  |
| 0.964997783                        | 880.9401786                                    | 0.953698832                     | 0.002833391                                   | 5.02193048                   |
| 0.963157129                        | 3218.446362                                    | 0.951395086                     | 0.001328872                                   | 5.206861982                  |
| 0.932241779                        | 191.1328359                                    | 0.907106407                     | 0.015680486                                   | 4.213310985                  |
| 0.927058483                        | 301.8676808                                    | 0.903082162                     | 0.010073095                                   | 4.211267525                  |
| 0.940276829                        | 249.0097389                                    | 0.919918684                     | 0.009898903                                   | 4.225854908                  |
| 0.962367846                        | 3076.771787                                    | 0.948914539                     | 0.000771173                                   | 5.469233367                  |
| 0.951988738                        | 1134.492356                                    | 0.933856112                     | 0.002527141                                   | 5.009178001                  |
| 0.905805136                        | 728.2674069                                    | 0.868180154                     | 0.005529482                                   | 4.559765518                  |
| 0.950605126                        | 203.241531                                     | 0.935483871                     | 0.019296724                                   | 4.136951083                  |
| 0.950995064                        | 284.6594949                                    | 0.934815989                     | 0.011287979                                   | 4.510515713                  |
| 0.97837244                         | 663.1531514                                    | 0.97149551                      | 0.007154162                                   | 5.162522139                  |
| 0.947363855                        | 1127.764484                                    | 0.927600395                     | 0.002153131                                   | 4.823281001                  |
| 0.963702522                        | 299.0596321                                    | 0.952397378                     | 0.012846029                                   | 4.558216258                  |
| 0.966802163                        | 1396.735223                                    | 0.955093142                     | 0.00191199                                    | 5.190187521                  |
| 0.947967225                        | 1518.259563                                    | 0.929504049                     | 0.001653243                                   | 4.779457253                  |
| 0.958609071                        | 911.1665374                                    | 0.945492948                     | 0.00273236                                    | 4.594002064                  |
| 0.909497308                        | 321.0190544                                    | 0.877589902                     | 0.008022244                                   | 3.970749478                  |
| 0.914524459                        | 507.7385265                                    | 0.884512301                     | 0.004800323                                   | 4.097395535                  |
| 0.941719543                        | 1825.207317                                    | 0.92167756                      | 0.001107768                                   | 4.814699505                  |
| 0.968159413                        | 858.1030855                                    | 0.957816377                     | 0.004342211                                   | 5.039514706                  |
| 0.969586414                        | 679.1025543                                    | 0.959644653                     | 0.00744699                                    | 5.124854241                  |
| 0.973567268                        | 669.5692306                                    | 0.96519546                      | 0.00592709                                    | 4.991472853                  |
| 0.962494063                        | 934.6719674                                    | 0.9496337                       | 0.003244801                                   | 5.031635433                  |
| 0.962060412                        | 1650.00626                                     | 0.949348613                     | 0.001696184                                   | 5.278445118                  |
| 0.951831786                        | 304.9553501                                    | 0.936660562                     | 0.008945572                                   | 4.324203684                  |
| 0.972483289                        | 1106.015177                                    | 0.963460104                     | 0.002433996                                   | 5.102094133                  |
| 0.968185379                        | 2268.492889                                    | 0.956964955                     | 0.001129162                                   | 5.159895291                  |
| 0.94728973                         | 122.2641862                                    | 0.933156499                     | 0.027767364                                   | 3.801263682                  |
| 0.934383832                        | 365.2880514                                    | 0.912732799                     | 0.005725162                                   | 4.051600992                  |
| 0.957144452                        | 2235.183847                                    | 0.942953869                     | 0.000917893                                   | 5.039720561                  |
| 0.941968332                        | 185.0202311                                    | 0.922187067                     | 0.013996924                                   | 4.124440031                  |
| 0.96828529                         | 1720.080755                                    | 0.958465504                     | 0.001917847                                   | 5.285999148                  |
| 0.93350865                         | 144.4364463                                    | 0.912147961                     | 0.023617521                                   | 3.920328372                  |
| 0.951266497                        | 155.8103604                                    | 0.938461538                     | 0.03815851                                    | 4.092544059                  |
| 0.931797321                        | 1287.792609                                    | 0.905641026                     | 0.002419401                                   | 4.781064323                  |
| 0.975315206                        | 1204.121182                                    | 0.967531053                     | 0.002955753                                   | 5.202042496                  |
| 0.97346799                         | 545.1760626                                    | 0.964398615                     | 0.008080944                                   | 5.057402995                  |
| 0.950911163                        | 2383.887034                                    | 0.932668798                     | 0.001083819                                   | 5.087353901                  |
| 0.94048266                         | 1326.79007                                     | 0.918347068                     | 0.001864794                                   | 4.683229028                  |
| 0.958773468                        | 355.2024342                                    | 0.945576163                     | 0.012870168                                   | 4.655562123                  |
| 0.964514126                        | 1576.297903                                    | 0.952871964                     | 0.002034461                                   | 5.152398012                  |
| 0.962393766                        | 191.7682078                                    | 0.952470294                     | 0.020646481                                   | 3.994016952                  |
| 0.94822399                         | 209.2600336                                    | 0.93160138                      | 0.014147383                                   | 4.211688546                  |
| 0.931595815                        | 301.2144758                                    | 0.905252121                     | 0.013075416                                   | 4.350041875                  |

| wavelet.LHH_glrIm_HighGrayLevelRunEmphasis | wavelet.LHH_glrIm_RunLengthNonUniformityNormalized | wavelet.LHH_glszm_GrayLevelVariance | wavelet.LHH_glszm_SmallAreaHighGrayLevelEmphasis |
|--------------------------------------------|----------------------------------------------------|-------------------------------------|--------------------------------------------------|
| 226.344785                                 | 0.870740727                                        | 25.99318386                         | 164.9930226                                      |
| 573.6970287                                | 0.847620071                                        | 48.57149227                         | 435.8350325                                      |
| 1432.861586                                | 0.949649788                                        | 101.130719                          | 1162.917588                                      |
| 488.6570034                                | 0.889307167                                        | 40.16340925                         | 362.6458484                                      |
| 217.4895236                                | 0.901411859                                        | 36.99659797                         | 187.6700092                                      |
| 644.761636                                 | 0.90562761                                         | 53.51283055                         | 521.7918822                                      |
| 1361.61154                                 | 0.943762459                                        | 205.274673                          | 1114.988419                                      |
| 1530.29611                                 | 0.91998776                                         | 65.52895065                         | 1147.720132                                      |
| 326.227668                                 | 0.881820447                                        | 29.03390535                         | 219.7602126                                      |
| 1220.242174                                | 0.904617498                                        | 63.00729581                         | 894.2570623                                      |
| 843.135637                                 | 0.926375066                                        | 95.24519112                         | 631.3497398                                      |
| 1139.780002                                | 0.913325942                                        | 109.6128234                         | 896.0917153                                      |
| 1379.815947                                | 0.900368957                                        | 82.09555423                         | 1051.943689                                      |
| 410.5490494                                | 0.896642324                                        | 41.33467752                         | 312.6280292                                      |
| 256.5187626                                | 0.8666491                                          | 25.09056805                         | 176.144293                                       |
| 188.9474888                                | 0.717608516                                        | 17.91830891                         | 140.7660692                                      |
| 406.3727399                                | 0.903393219                                        | 33.78557407                         | 298.6831964                                      |
| 356.010419                                 | 0.846559113                                        | 30.06238404                         | 243.5042861                                      |
| 300.474558                                 | 0.900816206                                        | 41.17932222                         | 235.8969737                                      |
| 1014.222617                                | 0.862208724                                        | 60.22667105                         | 733.7025639                                      |
| 434.9559213                                | 0.82087461                                         | 26.67940668                         | 325.5090203                                      |
| 1783.933446                                | 0.920555135                                        | 98.42993055                         | 1369.691526                                      |
| 75.02781795                                | 0.729041077                                        | 8.398790287                         | 51.22598737                                      |
| 1187.406016                                | 0.942314918                                        | 132.9582399                         | 1008.994458                                      |
| 1678.018679                                | 0.908641241                                        | 108.6634224                         | 1287.942665                                      |
| 524.3183166                                | 0.892151387                                        | 48.76929707                         | 371.2999503                                      |
| 990.1687155                                | 0.887988044                                        | 69.61565454                         | 745.4139266                                      |
| 1303.984753                                | 0.907380161                                        | 72.5082632                          | 1007.909124                                      |
| 2476.315397                                | 0.911270022                                        | 151.7791768                         | 1926.395588                                      |
| 961.1211783                                | 0.807274199                                        | 49.57631029                         | 730.784389                                       |
| 1511.63723                                 | 0.914219487                                        | 91.55925157                         | 1165.502084                                      |
| 478.8517872                                | 0.82514055                                         | 29.77478063                         | 336.7478121                                      |
| 500.7344848                                | 0.888526178                                        | 53.62237605                         | 392.0647586                                      |
| 877.0944377                                | 0.933510345                                        | 87.3902663                          | 612.212963                                       |
| 813.8644301                                | 0.944248607                                        | 92.54384636                         | 674.5109049                                      |
| 684.5005401                                | 0.876209368                                        | 46.85694521                         | 489.2931317                                      |
| 2314.054078                                | 0.892037282                                        | 110.358662                          | 1727.752807                                      |
| 497.5024546                                | 0.880600906                                        | 48.92586054                         | 387.4345769                                      |
| 442.8364938                                | 0.904743727                                        | 40.6582287                          | 325.8497318                                      |
| 1121.565912                                | 0.906474462                                        | 76.35026664                         | 897.627407                                       |
| 2086.128836                                | 0.894412017                                        | 76.3574024                          | 1544.868773                                      |
| 531.8294309                                | 0.885418901                                        | 36.06199782                         | 399.1149901                                      |
| 365.7248424                                | 0.899457446                                        | 37.95529202                         | 261.0057221                                      |
| 506.7297387                                | 0.916619895                                        | 65.78460873                         | 398.4733032                                      |
| 788.6175367                                | 0.918660425                                        | 50.96168062                         | 604.1902504                                      |
| 669.0897224                                | 0.879519345                                        | 39.67642801                         | 512.7731811                                      |
| 679.5195787                                | 0.882355385                                        | 45.04235922                         | 513.806232                                       |
| 960.0227877                                | 0.926830809                                        | 64.79508286                         | 762.5270141                                      |
| 82.72439472                                | 0.885797437                                        | 15.3264                             | 55.80220696                                      |
| 595.424794                                 | 0.924707186                                        | 73.04781385                         | 494.290735                                       |
| 583.3336976                                | 0.87384518                                         | 45.78592281                         | 440.9195452                                      |
| 505.7373879                                | 0.911203122                                        | 53.78701679                         | 375.933407                                       |
| 1865.878856                                | 0.916359374                                        | 129.3961708                         | 1465.704708                                      |
| 970.5797409                                | 0.93341201                                         | 114.8067866                         | 765.1221443                                      |
| 1132.873081                                | 0.79906729                                         | 47.81173737                         | 834.1399586                                      |
| 466.4261294                                | 0.91630126                                         | 60.51403773                         | 382.2864715                                      |
| 770.5649221                                | 0.912196848                                        | 71.6217258                          | 605.3686651                                      |
| 2782.787052                                | 0.907521278                                        | 105.3502455                         | 2053.927422                                      |
| 145.0832431                                | 0.838440239                                        | 21.05235125                         | 114.5861322                                      |
| 225.3302355                                | 0.826885578                                        | 27.55624243                         | 159.3621253                                      |
| 195.8548557                                | 0.855523473                                        | 22.4924975                          | 141.5389334                                      |
| 2638.693454                                | 0.906083675                                        | 135.1341968                         | 2088.432752                                      |
| 927.5008179                                | 0.882314763                                        | 71.35490657                         | 707.7962449                                      |
| 474.1921935                                | 0.783850496                                        | 55.20283547                         | 355.2627028                                      |
| 168.8357095                                | 0.879049573                                        | 24.5081512                          | 136.2095935                                      |
| 236.0074735                                | 0.879728852                                        | 34.89649778                         | 191.6908712                                      |
| 613.4680044                                | 0.94448722                                         | 82.83942693                         | 516.8822463                                      |
| 902.6630398                                | 0.871923443                                        | 62.27573474                         | 695.1788474                                      |
| 261.1560552                                | 0.909042007                                        | 36.68945705                         | 188.7745591                                      |
| 1222.843488                                | 0.916443399                                        | 92.67085478                         | 979.6124057                                      |
| 1219.493104                                | 0.873124757                                        | 55.2999874                          | 902.7825766                                      |
| 775.7706808                                | 0.897262228                                        | 38.06457025                         | 579.8157994                                      |
| 219.1822341                                | 0.790554197                                        | 17.99375977                         | 158.6035506                                      |
| 353.8016422                                | 0.801014307                                        | 20.69560095                         | 253.1082093                                      |
| 1436.303393                                | 0.858553449                                        | 57.79319613                         | 1015.21928                                       |
| 760.2153164                                | 0.919536978                                        | 66.07721726                         | 587.3684993                                      |
| 602.5968377                                | 0.92295155                                         | 68.61465208                         | 454.963607                                       |
| 603.8845818                                | 0.932612076                                        | 64.64048508                         | 474.9131868                                      |
| 808.8533581                                | 0.9063347                                          | 67.32527776                         | 625.8050277                                      |
| 1417.114184                                | 0.905117996                                        | 91.41849424                         | 1033.328317                                      |
| 251.7488627                                | 0.881249134                                        | 29.80210274                         | 188.8337626                                      |
| 990.6441283                                | 0.930123735                                        | 79.82843163                         | 752.2464505                                      |
| 1988.153642                                | 0.919735824                                        | 89.77110538                         | 1498.592543                                      |
| 99.05494962                                | 0.870925084                                        | 13.39460059                         | 46.30004012                                      |
| 279.7163248                                | 0.842346945                                        | 18.63274017                         | 197.240295                                       |
| 1880.102327                                | 0.893478283                                        | 73.02234812                         | 1344.315113                                      |
| 148.1796958                                | 0.859113914                                        | 19.41675632                         | 123.7138967                                      |
| 1524.120684                                | 0.919524527                                        | 103.4138402                         | 1143.967891                                      |
| 110.9521534                                | 0.842429966                                        | 18.35682398                         | 85.39682925                                      |
| 131.248545                                 | 0.880204615                                        | 27.94658216                         | 94.08743502                                      |
| 954.3473785                                | 0.837443629                                        | 66.3958141                          | 713.601467                                       |
| 1094.947209                                | 0.936777847                                        | 84.41953844                         | 822.3621836                                      |
| 493.8471868                                | 0.932518243                                        | 68.46746794                         | 407.5722114                                      |
| 1937.418736                                | 0.879687525                                        | 99.50308476                         | 1513.965121                                      |
| 1031.280234                                | 0.85636769                                         | 53.43074292                         | 788.9500582                                      |
| 302.2529141                                | 0.897408595                                        | 46.29296875                         | 226.095779                                       |
| 1365.277867                                | 0.910869738                                        | 88.10155397                         | 953.0845669                                      |
| 166.7537604                                | 0.905263728                                        | 19.92743764                         | 118.7640594                                      |
| 171.1345404                                | 0.873513976                                        | 22.1469679                          | 123.9878341                                      |
| 224.7880399                                | 0.837338963                                        | 29.31923041                         | 168.3361505                                      |



| wavelet.LHH_glszm_GrayLevelNonUniformityNormalized | wavelet.LHH_glszm_SizeZoneNonUniformityNormalized | wavelet.LHH_glszm_SizeZoneNonUniformity | wavelet.LHH_glszm_GrayLevelNonUniformity |
|----------------------------------------------------|---------------------------------------------------|-----------------------------------------|------------------------------------------|
| 0.057279717                                        | 0.414026755                                       | 113.029304                              | 15.63736264                              |
| 0.041274894                                        | 0.470165718                                       | 423.6193119                             | 37.18867925                              |
| 0.033000128                                        | 0.599705242                                       | 183.5098039                             | 10.09803922                              |
| 0.044814388                                        | 0.473341335                                       | 601.6168371                             | 56.95908733                              |
| 0.051393843                                        | 0.456004756                                       | 79.34482759                             | 8.942528736                              |
| 0.04207238                                         | 0.529085198                                       | 179.359882                              | 14.26253687                              |
| 0.021997622                                        | 0.57230975                                        | 132.7758621                             | 5.103448276                              |
| 0.037812128                                        | 0.51019025                                        | 295.9103448                             | 21.93103448                              |
| 0.053135037                                        | 0.388156713                                       | 327.6042654                             | 44.84597156                              |
| 0.037376493                                        | 0.48557955                                        | 774.9849624                             | 59.65288221                              |
| 0.030457561                                        | 0.507254015                                       | 257.6850394                             | 15.47244094                              |
| 0.027912948                                        | 0.551402338                                       | 467.0377804                             | 23.64226682                              |
| 0.037298596                                        | 0.502969869                                       | 535.6629108                             | 39.72300469                              |
| 0.045427495                                        | 0.474062686                                       | 269.2676056                             | 25.8028169                               |
| 0.060844628                                        | 0.394006619                                       | 131.2042042                             | 20.26126126                              |
| 0.079594462                                        | 0.421343252                                       | 511.5107084                             | 96.6276771                               |
| 0.049474927                                        | 0.462893804                                       | 163.8644068                             | 17.51412429                              |
| 0.054413923                                        | 0.406088516                                       | 348.8300349                             | 46.74155995                              |
| 0.046511111                                        | 0.454844444                                       | 136.4533333                             | 13.95333333                              |
| 0.03848182                                         | 0.452878254                                       | 551.1528348                             | 46.83237469                              |
| 0.057602793                                        | 0.461499639                                       | 785.4723854                             | 98.039953                                |
| 0.029694565                                        | 0.520439678                                       | 522.000997                              | 29.78364905                              |
| 0.113001135                                        | 0.388571054                                       | 166.3084112                             | 48.36448598                              |
| 0.025863491                                        | 0.589464388                                       | 189.2180685                             | 8.302180685                              |
| 0.031894295                                        | 0.513903331                                       | 343.2874251                             | 21.30538922                              |
| 0.042622296                                        | 0.447869792                                       | 148.6927711                             | 14.15060241                              |
| 0.037793776                                        | 0.452080348                                       | 735.5347265                             | 61.49047326                              |
| 0.038841629                                        | 0.504961265                                       | 390.3350582                             | 30.02457956                              |
| 0.024197722                                        | 0.547184727                                       | 553.2037587                             | 24.46389713                              |
| 0.043979697                                        | 0.501230611                                       | 472.1592357                             | 41.42887473                              |
| 0.034069106                                        | 0.489356988                                       | 859.8002277                             | 59.85941946                              |
| 0.054754814                                        | 0.399480492                                       | 759.4124145                             | 104.0889006                              |
| 0.041233508                                        | 0.484487573                                       | 468.4994829                             | 39.87280248                              |
| 0.041322314                                        | 0.461891644                                       | 30.48484848                             | 2.727272727                              |
| 0.031633259                                        | 0.563399603                                       | 124.5113122                             | 6.990950226                              |
| 0.044554562                                        | 0.450977331                                       | 388.7424594                             | 38.40603248                              |
| 0.032293636                                        | 0.47773577                                        | 659.2753623                             | 44.56521739                              |
| 0.041456876                                        | 0.485539711                                       | 769.5804416                             | 65.70914826                              |
| 0.047269828                                        | 0.433772826                                       | 183.0521327                             | 19.9478673                               |
| 0.035844839                                        | 0.532167434                                       | 311.3179487                             | 20.96923077                              |
| 0.037735923                                        | 0.468998548                                       | 333.9269663                             | 26.86797753                              |
| 0.049652003                                        | 0.443500485                                       | 189.3747073                             | 21.20140515                              |
| 0.046336693                                        | 0.468325037                                       | 366.230179                              | 36.23529412                              |
| 0.037236167                                        | 0.496487239                                       | 286.4731369                             | 21.48526863                              |
| 0.039983378                                        | 0.495474407                                       | 529.1666667                             | 42.70224719                              |
| 0.050094176                                        | 0.482417741                                       | 481.4529058                             | 49.99398798                              |
| 0.045615985                                        | 0.484323736                                       | 909.0756526                             | 85.62120405                              |
| 0.038388315                                        | 0.526544115                                       | 188.5027933                             | 13.74301676                              |
| 0.0808                                             | 0.3488                                            | 17.44                                   | 4.04                                     |
| 0.036139041                                        | 0.52278081                                        | 154.220339                              | 10.66101695                              |
| 0.043241488                                        | 0.480731589                                       | 747.5376206                             | 67.24051447                              |
| 0.039363717                                        | 0.479853554                                       | 213.5348315                             | 17.51685393                              |
| 0.027214263                                        | 0.50814701                                        | 1115.382688                             | 59.73530752                              |
| 0.028378215                                        | 0.541510687                                       | 197.1098901                             | 10.32967033                              |
| 0.049022192                                        | 0.47782515                                        | 952.7833501                             | 97.75025075                              |
| 0.038598495                                        | 0.512882962                                       | 250.2868852                             | 18.83606557                              |
| 0.035538638                                        | 0.501535478                                       | 591.8118644                             | 41.93559322                              |
| 0.032758007                                        | 0.478272378                                       | 316.6163142                             | 21.6858006                               |
| 0.065470024                                        | 0.449168956                                       | 133.852349                              | 19.51006711                              |
| 0.059244836                                        | 0.38919677                                        | 105.4723247                             | 16.05535055                              |
| 0.062908034                                        | 0.397207913                                       | 285.5924896                             | 45.23087622                              |
| 0.027419677                                        | 0.548745545                                       | 1667.63771                              | 83.3283975                               |
| 0.037312243                                        | 0.470826905                                       | 710.4777999                             | 56.30417495                              |
| 0.043408258                                        | 0.500324213                                       | 439.7849829                             | 38.15585893                              |
| 0.063013065                                        | 0.482714765                                       | 44.89247312                             | 5.860215054                              |
| 0.048854883                                        | 0.463722412                                       | 309.3028486                             | 32.5862069                               |
| 0.031688572                                        | 0.582033861                                       | 155.9850746                             | 8.492537313                              |
| 0.03944009                                         | 0.491683776                                       | 675.573508                              | 54.19068413                              |
| 0.049231543                                        | 0.452133008                                       | 106.7033898                             | 11.61864407                              |
| 0.033736446                                        | 0.541490502                                       | 616.7576822                             | 38.42581212                              |
| 0.042131905                                        | 0.488549674                                       | 674.1985507                             | 58.14202899                              |
| 0.048283975                                        | 0.470925006                                       | 257.5959781                             | 26.41133455                              |
| 0.071207092                                        | 0.413250551                                       | 530.6137072                             | 91.42990654                              |
| 0.064756923                                        | 0.404287959                                       | 699.0138809                             | 111.9647195                              |
| 0.040828708                                        | 0.435123492                                       | 1493.343823                             | 140.1241259                              |
| 0.036231537                                        | 0.497666037                                       | 321.4922601                             | 23.40557276                              |
| 0.035760029                                        | 0.517572895                                       | 343.1508296                             | 23.70889894                              |
| 0.035707511                                        | 0.554961048                                       | 216.9897698                             | 13.96163683                              |
| 0.036342988                                        | 0.481406993                                       | 446.7456897                             | 33.7262931                               |
| 0.031294918                                        | 0.490602442                                       | 738.8472776                             | 47.13014608                              |
| 0.055386727                                        | 0.420988138                                       | 85.03960396                             | 11.18811881                              |
| 0.034536899                                        | 0.526646881                                       | 430.2705018                             | 28.21664627                              |
| 0.034849408                                        | 0.522569805                                       | 835.5891182                             | 55.72420263                              |
| 0.083579882                                        | 0.288461538                                       | 15                                      | 4.346153846                              |
| 0.069165203                                        | 0.419328306                                       | 441.5527066                             | 72.83095916                              |
| 0.037268034                                        | 0.447672939                                       | 1148.728761                             | 95.62977397                              |
| 0.07039464                                         | 0.4612695                                         | 131.9230769                             | 20.13286713                              |
| 0.031860427                                        | 0.488133668                                       | 436.3914989                             | 28.48322148                              |
| 0.080357143                                        | 0.443877551                                       | 24.85714286                             | 4.5                                      |
| 0.059302852                                        | 0.431416931                                       | 20.27659574                             | 2.787234043                              |
| 0.039315252                                        | 0.4755132                                         | 731.8148148                             | 60.50617284                              |
| 0.032433286                                        | 0.51088668                                        | 226.3227991                             | 14.36794582                              |
| 0.035525139                                        | 0.524049398                                       | 333.8194662                             | 22.62951334                              |
| 0.03372937                                         | 0.532908025                                       | 1045.032636                             | 66.14329424                              |
| 0.043877011                                        | 0.494249305                                       | 1163.957113                             | 103.3303609                              |
| 0.047363281                                        | 0.500488281                                       | 64.0625                                 | 6.0625                                   |
| 0.034132824                                        | 0.451696526                                       | 294.506135                              | 22.25460123                              |
| 0.067775258                                        | 0.485008818                                       | 30.55555556                             | 4.26984127                               |
| 0.060642093                                        | 0.356004756                                       | 51.62068966                             | 8.793103448                              |
| 0.054306076                                        | 0.462307372                                       | 135.9183673                             | 15.96598639                              |

| wavelet.LHH_glszm_LargeAreaEmphasis | wavelet.LHH_glszm_ZoneVariance | wavelet.LHH_glszm_ZonePercentage | wavelet.LHH_glszm_LargeAreaLowGrayLevelEmphasis | wavelet.LHH_glszm_LargeAreaHighGrayLevelEmphasis |
|-------------------------------------|--------------------------------|----------------------------------|-------------------------------------------------|--------------------------------------------------|
| 32.9010989                          | 26.2132861                     | 0.386685552                      | 0.180275925                                     | 6596.941392                                      |
| 108.1076582                         | 102.7936354                    | 0.433798748                      | 0.20043727                                      | 59455.44506                                      |
| 2.928104575                         | 0.916527831                    | 0.705069124                      | 0.006069928                                     | 4117.039216                                      |
| 36.693155                           | 32.39511811                    | 0.482352941                      | 0.084569657                                     | 16810.28482                                      |
| 12.75287356                         | 8.496003435                    | 0.484679666                      | 0.097851219                                     | 2364.373563                                      |
| 8.97640118                          | 5.378721034                    | 0.527216174                      | 0.019312433                                     | 5423.9941                                        |
| 3.056034483                         | 0.946027794                    | 0.6884273                        | 0.009052733                                     | 3886.836207                                      |
| 5.796551724                         | 2.811997622                    | 0.578842315                      | 0.005833029                                     | 8845.601724                                      |
| 23.51777251                         | 17.45007272                    | 0.405964406                      | 0.08115533                                      | 7686.741706                                      |
| 12.38220551                         | 8.614325601                    | 0.515171078                      | 0.012840368                                     | 14819.45927                                      |
| 4.529527559                         | 1.879297384                    | 0.61426844                       | 0.013655417                                     | 3691.474409                                      |
| 8.734356553                         | 5.672889523                    | 0.571524966                      | 0.010902518                                     | 9547.792208                                      |
| 13.09483568                         | 9.302399436                    | 0.513500482                      | 0.01133266                                      | 17551.46385                                      |
| 19.98239437                         | 16.10815066                    | 0.508050089                      | 0.057173952                                     | 7838.426056                                      |
| 53.1981982                          | 45.71394818                    | 0.365532382                      | 0.23507843                                      | 12820.46847                                      |
| 6460.704283                         | 6427.958361                    | 0.174751691                      | 35.70110327                                     | 1176306.292                                      |
| 8.966101695                         | 5.078298062                    | 0.507163324                      | 0.029331751                                     | 3644.09322                                       |
| 100.5075669                         | 93.13751133                    | 0.368353345                      | 0.298177008                                     | 34702.79278                                      |
| 10.08666667                         | 6.323066667                    | 0.515463918                      | 0.063237297                                     | 2814.016667                                      |
| 106.3607231                         | 101.0635391                    | 0.434487683                      | 0.111392615                                     | 103353.8669                                      |
| 740.2350176                         | 730.8142298                    | 0.325803982                      | 1.789646163                                     | 307488.1469                                      |
| 7.118644068                         | 4.177914909                    | 0.583139535                      | 0.005578537                                     | 12050.41376                                      |
| 2418.03972                          | 2377.324586                    | 0.15671915                       | 34.01754168                                     | 175726.0023                                      |
| 3.903426791                         | 1.658097262                    | 0.667359667                      | 0.008004116                                     | 4214.890966                                      |
| 9.473053892                         | 6.224425401                    | 0.554817276                      | 0.009570851                                     | 15468.07934                                      |
| 10.77710843                         | 6.40749746                     | 0.478386167                      | 0.028381916                                     | 5515.756024                                      |
| 21.50583897                         | 16.9676559                     | 0.469417196                      | 0.024739077                                     | 20144.85187                                      |
| 11.91849935                         | 8.481864479                    | 0.539427774                      | 0.011453902                                     | 15454.74644                                      |
| 10.6735905                          | 7.625785988                    | 0.572804533                      | 0.006012374                                     | 26059.27992                                      |
| 352.7558386                         | 345.4738619                    | 0.370574351                      | 0.384362098                                     | 325961.4575                                      |
| 7.539556061                         | 4.265866204                    | 0.552689525                      | 0.00673867                                      | 11211.98179                                      |
| 333.1025776                         | 323.3718536                    | 0.320573356                      | 0.73775175                                      | 151674.0168                                      |
| 24.97518097                         | 20.55518566                    | 0.475651746                      | 0.06336833                                      | 11139.68046                                      |
| 3.272727273                         | 0.789715335                    | 0.634615385                      | 0.021542415                                     | 2863.075758                                      |
| 3.647058824                         | 1.390266375                    | 0.665662651                      | 0.01539722                                      | 2835.60181                                       |
| 52.19257541                         | 46.70111057                    | 0.426732673                      | 0.085235635                                     | 33111.91647                                      |
| 16.6115942                          | 12.25620668                    | 0.479166667                      | 0.00852146                                      | 37141.39855                                      |
| 84.04164038                         | 79.56381057                    | 0.472570066                      | 0.193261701                                     | 37947.28454                                      |
| 9.409952607                         | 5.494805822                    | 0.505389222                      | 0.032782327                                     | 4115.886256                                      |
| 11.38632479                         | 8.170893418                    | 0.557673975                      | 0.014243986                                     | 11713.86838                                      |
| 14.61516854                         | 10.32933815                    | 0.483039349                      | 0.008968694                                     | 29017.24017                                      |
| 19.36065574                         | 14.37950079                    | 0.448058762                      | 0.043228314                                     | 9572.838407                                      |
| 20.1713555                          | 15.7624296                     | 0.476248477                      | 0.067320229                                     | 7124.318414                                      |
| 6.927209705                         | 3.771506838                    | 0.562926829                      | 0.024658379                                     | 3217.206239                                      |
| 6.241573034                         | 3.149507638                    | 0.568690096                      | 0.010227633                                     | 4733.972846                                      |
| 31.56513026                         | 26.5812306                     | 0.447935368                      | 0.051533388                                     | 20474.38377                                      |
| 34.22482685                         | 29.05931744                    | 0.439990624                      | 0.055310695                                     | 22195.65157                                      |
| 5.421787709                         | 2.769802753                    | 0.61406518                       | 0.018115324                                     | 4881.815642                                      |
| 21.2                                | 14.0176                        | 0.373134328                      | 0.416569822                                     | 1706.16                                          |
| 4.938983051                         | 2.100614766                    | 0.593561368                      | 0.017146685                                     | 2716.101695                                      |
| 98.26366559                         | 93.41517313                    | 0.454147196                      | 0.186597775                                     | 52771.98071                                      |
| 7.364044944                         | 3.910294155                    | 0.53808948                       | 0.024192687                                     | 3566.226966                                      |
| 7.122095672                         | 4.091799856                    | 0.574456948                      | 0.004939038                                     | 12697.32711                                      |
| 6.057692308                         | 3.421529707                    | 0.615905245                      | 0.010915618                                     | 5876.208791                                      |
| 1692.632397                         | 1681.930902                    | 0.305687567                      | 1.511369558                                     | 1898534.302                                      |
| 8.022540984                         | 4.778113242                    | 0.555176337                      | 0.032742109                                     | 3440.372951                                      |
| 9.838135593                         | 6.384207843                    | 0.538075695                      | 0.016692066                                     | 7023.657627                                      |
| 9.829305136                         | 6.014423472                    | 0.511987626                      | 0.00537378                                      | 26821.57855                                      |
| 78.60402685                         | 71.14269627                    | 0.366093366                      | 0.641828652                                     | 10183.74832                                      |
| 111.2509225                         | 100.6824253                    | 0.307604994                      | 0.569209565                                     | 22606.18081                                      |
| 68.23504868                         | 59.54936252                    | 0.339310996                      | 0.400109936                                     | 12319.50904                                      |
| 22.04146101                         | 18.79221454                    | 0.554764513                      | 0.009540253                                     | 54632.63146                                      |
| 26.34194831                         | 22.14881684                    | 0.488349515                      | 0.033073544                                     | 23032.77005                                      |
| 556.1626849                         | 546.5096105                    | 0.321860124                      | 1.222277694                                     | 255384.818                                       |
| 18.41935484                         | 12.97491039                    | 0.428571429                      | 0.153351585                                     | 3058.580645                                      |
| 30.76911544                         | 25.3479677                     | 0.429491307                      | 0.162135812                                     | 6622.092954                                      |
| 3.455223881                         | 1.293880502                    | 0.680203046                      | 0.014784126                                     | 2006.910448                                      |
| 89.03275109                         | 83.61883143                    | 0.429777917                      | 0.1063799                                       | 76150.85881                                      |
| 6.525423729                         | 2.953964378                    | 0.529147982                      | 0.044433189                                     | 1603.911017                                      |
| 10.64003512                         | 7.522748803                    | 0.566384883                      | 0.011011011                                     | 12320.89991                                      |
| 79.57971014                         | 74.72694812                    | 0.453947368                      | 0.068550594                                     | 94499.60072                                      |
| 15.04753199                         | 10.78749637                    | 0.484499557                      | 0.022943072                                     | 11255.65448                                      |
| 1527.428349                         | 1511.228351                    | 0.248452012                      | 7.391418894                                     | 317554.9447                                      |
| 1019.238866                         | 1004.150876                    | 0.257444908                      | 2.980410194                                     | 350261.0359                                      |
| 99.33333333                         | 92.17864362                    | 0.373856209                      | 0.072438231                                     | 137949.8843                                      |
| 6.315789474                         | 3.33134603                     | 0.578853047                      | 0.017081451                                     | 4457.478328                                      |
| 5.16892911                          | 2.330491914                    | 0.593554163                      | 0.019159018                                     | 3058.40724                                       |
| 4.184143223                         | 1.75022403                     | 0.640983607                      | 0.013894541                                     | 2509.01023                                       |
| 11.65086207                         | 8.037585464                    | 0.526077098                      | 0.01981058                                      | 8495.650862                                      |
| 16.03452855                         | 12.46328189                    | 0.529163739                      | 0.013948294                                     | 21582.56042                                      |
| 19.51485149                         | 13.28957945                    | 0.400793651                      | 0.092593608                                     | 4955.311881                                      |
| 5.526315789                         | 2.83221746                     | 0.609246831                      | 0.007978595                                     | 5353.356181                                      |
| 7.703564728                         | 4.654729875                    | 0.572707736                      | 0.005002521                                     | 14928.69731                                      |
| 15.94230769                         | 8.166789941                    | 0.35862069                       | 0.223926761                                     | 1605.903846                                      |
| 311.2298196                         | 300.8593401                    | 0.310527868                      | 1.186510091                                     | 82316.09972                                      |
| 15.60950896                         | 11.05529349                    | 0.468590212                      | 0.009190942                                     | 28774.91387                                      |
| 64.62937063                         | 57.22944887                    | 0.367609254                      | 0.513359423                                     | 8647.776224                                      |
| 5.928411633                         | 2.914653494                    | 0.576030928                      | 0.006172583                                     | 8770.819911                                      |
| 44.66071429                         | 33.98182398                    | 0.306010929                      | 0.517896359                                     | 4444.642857                                      |
| 11.12765957                         | 6.136713445                    | 0.447619048                      | 0.165401094                                     | 1317.829787                                      |
| 244.6127355                         | 237.9416421                    | 0.387169811                      | 0.268023102                                     | 225679.6342                                      |
| 4.230248307                         | 1.690434091                    | 0.627478754                      | 0.007368952                                     | 4446.616253                                      |
| 4.684458399                         | 2.110373143                    | 0.623287671                      | 0.020983373                                     | 2137.544741                                      |
| 83.0045895                          | 78.65456774                    | 0.479462103                      | 0.04600207                                      | 153197.8868                                      |
| 286.9783439                         | 280.9001824                    | 0.405614881                      | 0.296688226                                     | 280145.2374                                      |
| 12.1484375                          | 8.241638184                    | 0.505928854                      | 0.062621837                                     | 3416.132813                                      |
| 7.561349693                         | 4.083010275                    | 0.536184211                      | 0.00797354                                      | 10158.90798                                      |
| 9.031746032                         | 5.219954649                    | 0.512195122                      | 0.085516957                                     | 1494.793651                                      |
| 19.33103448                         | 12.4991201                     | 0.382585752                      | 0.156857792                                     | 2972.455172                                      |
| 92.64285714                         | 85.10839234                    | 0.364312268                      | 0.486274628                                     | 18983.52041                                      |

| wavelet.LHH_glszm_HighGrayLevelZoneEmphasis | wavelet.LHH_glszm_SmallAreaEmphasis | wavelet.LHH_glszm_LowGrayLevelZoneEmphasis | wavelet.LHH_glszm_ZoneEntropy | wavelet.LHH_glszm_SmallAreaLowGrayLevelEmphasis |
|---------------------------------------------|-------------------------------------|--------------------------------------------|-------------------------------|-------------------------------------------------|
| 242.3956044                                 | 0.667628471                         | 0.011774355                                | 5.801986491                   | 0.009820734                                     |
| 595.7991121                                 | 0.713004734                         | 0.003901499                                | 6.311164424                   | 0.003185943                                     |
| 1445.575163                                 | 0.802562808                         | 0.004542639                                | 6.097246303                   | 0.004387237                                     |
| 502.7010228                                 | 0.715204502                         | 0.004777603                                | 6.20145737                    | 0.004019084                                     |
| 246.5804598                                 | 0.702099103                         | 0.016921318                                | 5.732298727                   | 0.014020982                                     |
| 674.5368732                                 | 0.754566243                         | 0.005234369                                | 6.010840716                   | 0.004786131                                     |
| 1397.905172                                 | 0.785162499                         | 0.006179676                                | 6.425721839                   | 0.005890162                                     |
| 1538.632759                                 | 0.742048407                         | 0.00256155                                 | 6.286872861                   | 0.002376593                                     |
| 334.5379147                                 | 0.645949875                         | 0.007285972                                | 6.248338068                   | 0.005757714                                     |
| 1230.625313                                 | 0.724600673                         | 0.002959906                                | 6.497576359                   | 0.002694719                                     |
| 849.8720472                                 | 0.740272544                         | 0.006666327                                | 6.459608244                   | 0.006029764                                     |
| 1158.24085                                  | 0.770381363                         | 0.003146034                                | 6.598571371                   | 0.002871293                                     |
| 1405.278873                                 | 0.736947123                         | 0.002068432                                | 6.478081096                   | 0.001847433                                     |
| 426.1989437                                 | 0.715935725                         | 0.006553149                                | 6.10492757                    | 0.005584232                                     |
| 265.8528529                                 | 0.650351259                         | 0.010057187                                | 5.902473827                   | 0.007808885                                     |
| 204.8912685                                 | 0.674761888                         | 0.010861229                                | 5.756705894                   | 0.008769431                                     |
| 412.7146893                                 | 0.707175733                         | 0.007844178                                | 5.894405783                   | 0.006908414                                     |
| 363.5180442                                 | 0.661568538                         | 0.005935058                                | 6.207791329                   | 0.004716498                                     |
| 316.85                                      | 0.700740579                         | 0.012190631                                | 6.027396185                   | 0.00746256                                      |
| 1037.598192                                 | 0.699000949                         | 0.002211695                                | 6.517502385                   | 0.00183955                                      |
| 453.4829612                                 | 0.706550714                         | 0.004175119                                | 5.985872395                   | 0.003374193                                     |
| 1815.759721                                 | 0.749707565                         | 0.001769144                                | 6.598244101                   | 0.001609163                                     |
| 78.59813084                                 | 0.645316029                         | 0.029892349                                | 5.177105965                   | 0.022520054                                     |
| 1235.984424                                 | 0.795821405                         | 0.004720858                                | 6.342454749                   | 0.004465417                                     |
| 1704.474551                                 | 0.744965915                         | 0.004155111                                | 6.567027062                   | 0.00397356                                      |
| 529.7259036                                 | 0.695155216                         | 0.006896335                                | 6.170207964                   | 0.006143897                                     |
| 1036.837124                                 | 0.699315728                         | 0.002139616                                | 6.666259393                   | 0.001778947                                     |
| 1340.992238                                 | 0.738606967                         | 0.002541816                                | 6.357514258                   | 0.002290458                                     |
| 2504.173096                                 | 0.767902997                         | 0.001843952                                | 6.788360272                   | 0.001718466                                     |
| 986.3131635                                 | 0.735841576                         | 0.002685994                                | 6.210740969                   | 0.002325853                                     |
| 1561.978372                                 | 0.727311151                         | 0.002061782                                | 6.677435546                   | 0.001848718                                     |
| 499.3940032                                 | 0.656817471                         | 0.003354942                                | 6.33409552                    | 0.002090178                                     |
| 529.1509824                                 | 0.723601359                         | 0.007420079                                | 6.307145045                   | 0.006629182                                     |
| 874.787888                                  | 0.703282828                         | 0.018538947                                | 5.441751127                   | 0.018127481                                     |
| 838.9954751                                 | 0.779045614                         | 0.007686589                                | 6.087300753                   | 0.006420451                                     |
| 703.8097448                                 | 0.697599317                         | 0.003614927                                | 6.283118111                   | 0.003117621                                     |
| 2367.15942                                  | 0.7185898                           | 0.001320884                                | 6.82963175                    | 0.001181398                                     |
| 523.1211356                                 | 0.724026375                         | 0.005377498                                | 6.294626023                   | 0.004165059                                     |
| 458.2890995                                 | 0.683939296                         | 0.010746734                                | 6.113802181                   | 0.009797413                                     |
| 1161.405128                                 | 0.757740074                         | 0.00367319                                 | 6.259476386                   | 0.003395827                                     |
| 2142.391854                                 | 0.712067656                         | 0.001973266                                | 6.483887971                   | 0.001826765                                     |
| 563.4473068                                 | 0.691265824                         | 0.004761849                                | 5.997961248                   | 0.004081844                                     |
| 368.1534527                                 | 0.711009586                         | 0.009061423                                | 6.13336275                    | 0.007691405                                     |
| 529.339688                                  | 0.732399005                         | 0.007323092                                | 6.278983109                   | 0.006259045                                     |
| 811.9569288                                 | 0.731530052                         | 0.002667653                                | 6.270448504                   | 0.002251605                                     |
| 695.1492986                                 | 0.722128601                         | 0.003385794                                | 6.143874013                   | 0.002863558                                     |
| 701.160895                                  | 0.723211868                         | 0.003064505                                | 6.355001102                   | 0.002577523                                     |
| 989.6005587                                 | 0.753825434                         | 0.004273895                                | 6.054932224                   | 0.001861269                                     |
| 88.6                                        | 0.585814834                         | 0.048248577                                | 4.86346519                    | 0.020804907                                     |
| 633.3728814                                 | 0.750488923                         | 0.007188668                                | 6.194474723                   | 0.006529832                                     |
| 605.9376206                                 | 0.720969898                         | 0.003892639                                | 6.300233318                   | 0.003299968                                     |
| 515.6988764                                 | 0.720184644                         | 0.00608838                                 | 6.221291908                   | 0.005192163                                     |
| 1931.949886                                 | 0.740979496                         | 0.001212754                                | 6.900145                      | 0.001037813                                     |
| 988.6263736                                 | 0.764315017                         | 0.004725479                                | 6.370490325                   | 0.004350267                                     |
| 1147.329488                                 | 0.718867736                         | 0.001599184                                | 6.282893104                   | 0.001325175                                     |
| 494.9118852                                 | 0.74380023                          | 0.006779197                                | 6.160121767                   | 0.004169827                                     |
| 803.5076271                                 | 0.736092089                         | 0.00337992                                 | 6.49549037                    | 0.002937196                                     |
| 2829.654079                                 | 0.718688555                         | 0.002024062                                | 6.613063811                   | 0.001914249                                     |
| 158.1308725                                 | 0.696932384                         | 0.017300023                                | 5.626696989                   | 0.01330332                                      |
| 237.9667897                                 | 0.647321049                         | 0.013086361                                | 5.919761903                   | 0.0101421                                       |
| 208.1947149                                 | 0.654937015                         | 0.010881653                                | 6.059388444                   | 0.008052406                                     |
| 2697.679171                                 | 0.769160581                         | 0.000890823                                | 6.820178345                   | 0.000788777                                     |
| 967.1451292                                 | 0.71315696                          | 0.00303976                                 | 6.574993401                   | 0.002617392                                     |
| 482.596132                                  | 0.734962711                         | 0.007014753                                | 6.231692096                   | 0.005835916                                     |
| 180.3978495                                 | 0.719168802                         | 0.026656622                                | 5.260280349                   | 0.022794406                                     |
| 257.8770615                                 | 0.708024954                         | 0.015492399                                | 6.015693935                   | 0.013683467                                     |
| 635.6156716                                 | 0.791187405                         | 0.008642918                                | 6.010445355                   | 0.007964594                                     |
| 940.444687                                  | 0.728958541                         | 0.002464299                                | 6.439158675                   | 0.00206408                                      |
| 268.8644068                                 | 0.699005632                         | 0.017781136                                | 5.806653283                   | 0.01624492                                      |
| 1260.942054                                 | 0.763680663                         | 0.002325938                                | 6.477264489                   | 0.002090066                                     |
| 1237.463768                                 | 0.726678312                         | 0.002017332                                | 6.326386675                   | 0.001762074                                     |
| 799.8043876                                 | 0.713483796                         | 0.003448611                                | 6.060623519                   | 0.003024741                                     |
| 233.1962617                                 | 0.668235754                         | 0.007142191                                | 5.861826947                   | 0.005304275                                     |
| 375.3718913                                 | 0.661118686                         | 0.004256426                                | 6.099705789                   | 0.003111821                                     |
| 1476.197844                                 | 0.685818564                         | 0.001132266                                | 6.716446534                   | 0.000892343                                     |
| 785.5789474                                 | 0.73326524                          | 0.003926725                                | 6.326449999                   | 0.002290511                                     |
| 608.0030166                                 | 0.747419213                         | 0.010103593                                | 6.33776803                    | 0.009454174                                     |
| 610.4782609                                 | 0.773372779                         | 0.00740438                                 | 6.070495683                   | 0.006809599                                     |
| 847.5883621                                 | 0.721472959                         | 0.004191095                                | 6.47720429                    | 0.00375639                                      |
| 1428.374502                                 | 0.728306931                         | 0.002123334                                | 6.710133019                   | 0.001892144                                     |
| 263.0445545                                 | 0.673859151                         | 0.011998339                                | 5.779253981                   | 0.01002897                                      |
| 997.2435741                                 | 0.753826108                         | 0.002968822                                | 6.364316153                   | 0.002669716                                     |
| 1996.43965                                  | 0.751147914                         | 0.001388859                                | 6.535918362                   | 0.001246788                                     |
| 92.67307692                                 | 0.546953084                         | 0.04475641                                 | 5.041503901                   | 0.037784773                                     |
| 287.5242165                                 | 0.672870874                         | 0.005743838                                | 5.831006056                   | 0.004318176                                     |
| 1910.444271                                 | 0.695918578                         | 0.001048189                                | 6.751707258                   | 0.000867799                                     |
| 166.1993007                                 | 0.705999536                         | 0.01561693                                 | 5.428449074                   | 0.012397668                                     |
| 1552.519016                                 | 0.726312679                         | 0.002516309                                | 6.6189985                     | 0.002298392                                     |
| 123.0535714                                 | 0.696077717                         | 0.036905842                                | 4.822332432                   | 0.022683504                                     |
| 136.6382979                                 | 0.673017833                         | 0.065071561                                | 4.884168107                   | 0.061447199                                     |
| 981.1929825                                 | 0.717083369                         | 0.003201772                                | 6.549990355                   | 0.002847809                                     |
| 1107.264108                                 | 0.742225055                         | 0.003781194                                | 6.339965559                   | 0.003496057                                     |
| 520.3469388                                 | 0.752226833                         | 0.010086477                                | 6.236581895                   | 0.009130763                                     |
| 1983.266701                                 | 0.758140498                         | 0.001303944                                | 6.58386748                    | 0.001156071                                     |
| 1068.942251                                 | 0.730794695                         | 0.001678148                                | 6.352203457                   | 0.00104979                                      |
| 308.328125                                  | 0.734169591                         | 0.019072764                                | 5.423185204                   | 0.01779059                                      |
| 1369.016871                                 | 0.69845722                          | 0.002752221                                | 6.603081388                   | 0.002495682                                     |
| 166.2222222                                 | 0.721665837                         | 0.029861435                                | 4.82443563                    | 0.027410158                                     |
| 189.3586207                                 | 0.61323775                          | 0.018614088                                | 5.711632909                   | 0.015114824                                     |
| 237.4047619                                 | 0.706352302                         | 0.01434851                                 | 5.727327703                   | 0.009341862                                     |

| wavelet.LHH_ngtdm_Coarseness | wavelet.LHH_ngtdm_Complexity | wavelet.LHH_ngtdm_Strength | wavelet.LHH_ngtdm_Busyness | wavelet.LHH_ngtdm_Contrast | wavelet.HLL_gldm_GrayLevelVariance |
|------------------------------|------------------------------|----------------------------|----------------------------|----------------------------|------------------------------------|
| 0.009281655                  | 1.225152297                  | 2.110118625                | 0.235495252                | 0.000168559                | 72.10313862                        |
| 0.003958806                  | 1.083561735                  | 2.038370352                | 0.201524574                | 5.45E-05                   | 31.59851588                        |
| 0.014821927                  | 17.18530458                  | 14.85622938                | 0.029693805                | 0.000788084                | 28.86423581                        |
| 0.002687657                  | 0.969096917                  | 1.312530668                | 0.339977832                | 4.82E-05                   | 81.20902549                        |
| 0.017352888                  | 3.956598797                  | 5.375644994                | 0.126119868                | 0.000567383                | 29.42486648                        |
| 0.010077297                  | 4.256837165                  | 5.303924543                | 0.084606442                | 0.000287782                | 40.12200296                        |
| 0.021238182                  | 30.42044885                  | 29.08915693                | 0.026916947                | 0.002034149                | 13.29077477                        |
| 0.006551296                  | 5.1214457                    | 5.519248263                | 0.066702677                | 0.000200667                | 31.6515233                         |
| 0.003084588                  | 0.736223119                  | 1.159502448                | 0.425090378                | 4.86E-05                   | 71.38667233                        |
| 0.00238713                   | 1.903294052                  | 3.01296436                 | 0.159913825                | 3.67E-05                   | 22.04281652                        |
| 0.009894836                  | 6.210158019                  | 8.121279994                | 0.067732629                | 0.000365554                | 15.90024403                        |
| 0.005329351                  | 5.445040348                  | 6.282859757                | 0.078941902                | 0.000155341                | 51.73436387                        |
| 0.003379092                  | 4.471529686                  | 6.207057698                | 0.085459915                | 5.49E-05                   | 21.20965571                        |
| 0.005843816                  | 2.090585574                  | 2.462178071                | 0.192952659                | 0.000144466                | 54.95648055                        |
| 0.007175309                  | 1.052195798                  | 1.996023665                | 0.241057715                | 1.00E-04                   | 41.5580832                         |
| 0.0010259                    | 0.073800227                  | 0.418816059                | 1.620822434                | 2.75E-06                   | 29.00445017                        |
| 0.008984078                  | 2.120340311                  | 2.687697207                | 0.166468833                | 0.000272349                | 39.32573624                        |
| 0.003101919                  | 0.540908696                  | 1.120251988                | 0.404005428                | 3.73E-05                   | 22.81526083                        |
| 0.010609357                  | 3.739212259                  | 3.983172026                | 0.138011877                | 0.000349607                | 157.6271448                        |
| 0.003080437                  | 1.510415661                  | 3.496239897                | 0.133805105                | 2.86E-05                   | 12.46861674                        |
| 0.001466416                  | 0.282380292                  | 0.697871712                | 0.632352759                | 9.54E-06                   | 42.91294534                        |
| 0.004123292                  | 5.832462782                  | 6.016641894                | 0.072166523                | 0.000112906                | 21.07929658                        |
| 0.002529299                  | 0.042710969                  | 0.195130889                | 2.304312814                | 1.19E-05                   | 67.41326841                        |
| 0.015239605                  | 13.26917463                  | 12.65472329                | 0.03989617                 | 0.00097403                 | 39.6396454                         |
| 0.007058333                  | 6.423703955                  | 9.894497454                | 0.043660031                | 0.000148023                | 18.4754328                         |
| 0.010796195                  | 3.197718399                  | 5.445621149                | 0.094003585                | 0.000230253                | 25.7580102                         |
| 0.002231974                  | 1.896952573                  | 3.607239247                | 0.167871077                | 2.59E-05                   | 22.03018224                        |
| 0.004998361                  | 4.941402045                  | 7.254077008                | 0.071510705                | 9.29E-05                   | 22.56566361                        |
| 0.005134784                  | 6.453307375                  | 9.392459379                | 0.046940859                | 0.000134461                | 37.43299762                        |
| 0.003146475                  | 1.253983983                  | 2.827869755                | 0.145667955                | 2.71E-05                   | 43.30882341                        |
| 0.002454873                  | 2.915162168                  | 4.653224086                | 0.118047566                | 4.07E-05                   | 20.94623008                        |
| 0.001385892                  | 0.302103529                  | 1.102834417                | 0.547785768                | 6.80E-06                   | 12.01955441                        |
| 0.003413468                  | 1.839689875                  | 2.584849332                | 0.217516842                | 5.95E-05                   | 83.09425759                        |
| 0.054558384                  | 26.72760481                  | 26.21771868                | 0.019308525                | 0.005914294                | 42.38822115                        |
| 0.021465749                  | 11.41108523                  | 12.84531391                | 0.045391447                | 0.00128748                 | 49.9805487                         |
| 0.003514806                  | 1.659105605                  | 2.962450961                | 0.16674859                 | 4.15E-05                   | 45.75589526                        |
| 0.002856327                  | 3.721473034                  | 6.948913605                | 0.06912569                 | 3.78E-05                   | 26.12448881                        |
| 0.002188921                  | 1.001240013                  | 1.332024681                | 0.355643818                | 3.64E-05                   | 45.58208384                        |
| 0.007620219                  | 2.508777609                  | 3.495857663                | 0.15013908                 | 0.000193311                | 14.06181075                        |
| 0.006283576                  | 5.872966537                  | 6.111889972                | 0.070945205                | 0.000187028                | 62.85264008                        |
| 0.004956126                  | 4.324547269                  | 7.37497933                 | 0.054924522                | 7.52E-05                   | 20.73563477                        |
| 0.007268866                  | 1.721535586                  | 2.890417945                | 0.147066807                | 0.000136256                | 62.52828589                        |
| 0.004156923                  | 1.151910843                  | 1.550166695                | 0.290746163                | 8.81E-05                   | 39.31082531                        |
| 0.007195564                  | 3.820077862                  | 4.826111942                | 0.122075044                | 0.000210208                | 33.30326615                        |
| 0.003352307                  | 2.165086692                  | 2.303335568                | 0.204489804                | 9.58E-05                   | 24.61173347                        |
| 0.002981281                  | 1.336567629                  | 2.298354307                | 0.213403195                | 3.80E-05                   | 51.49214562                        |
| 0.001662011                  | 1.051650242                  | 1.812981993                | 0.311940281                | 1.69E-05                   | 77.49137007                        |
| 0.012253244                  | 6.427317633                  | 7.659822085                | 0.056832388                | 0.000453612                | 31.54932346                        |
| 0.041251859                  | 1.837665521                  | 3.614496373                | 0.176886215                | 0.001406361                | 239.8320339                        |
| 0.015523849                  | 7.410663952                  | 11.32505804                | 0.059751806                | 0.000490277                | 19.70894988                        |
| 0.002079474                  | 1.019272894                  | 1.522066201                | 0.322451536                | 2.96E-05                   | 41.21405245                        |
| 0.008723899                  | 2.938291639                  | 4.240939879                | 0.133231767                | 0.000287175                | 28.36231831                        |
| 0.002171891                  | 3.206132107                  | 4.646001782                | 0.117718651                | 4.71E-05                   | 28.76693113                        |
| 0.013686966                  | 8.526378895                  | 10.39090012                | 0.050220008                | 0.000635622                | 20.96683759                        |
| 0.00117594                   | 0.557798066                  | 1.860175386                | 0.282724389                | 5.09E-06                   | 35.84958452                        |
| 0.007474529                  | 4.569861182                  | 4.832899444                | 0.129558113                | 0.000259445                | 111.3539276                        |
| 0.003082204                  | 3.14018359                   | 3.324496879                | 0.160977242                | 6.97E-05                   | 41.83472347                        |
| 0.006083573                  | 6.179070672                  | 12.23111145                | 0.039473552                | 0.000125561                | 23.0456674                         |
| 0.00831895                   | 0.818773029                  | 1.641543558                | 0.345038902                | 0.000120677                | 68.83582304                        |
| 0.007998526                  | 1.14387667                   | 2.754230621                | 0.198459982                | 7.34E-05                   | 22.19345471                        |
| 0.003216897                  | 0.531663571                  | 1.213756305                | 0.550856173                | 3.14E-05                   | 69.93917456                        |
| 0.001535362                  | 3.134253587                  | 4.889950792                | 0.102042666                | 2.25E-05                   | 24.60522431                        |
| 0.002668262                  | 1.807935555                  | 3.287326775                | 0.154839089                | 3.47E-05                   | 20.71979347                        |
| 0.002809026                  | 0.817259858                  | 2.207351243                | 0.258664344                | 2.68E-05                   | 34.01849951                        |
| 0.027517883                  | 2.491613911                  | 3.961408847                | 0.119771889                | 0.000844807                | 43.87712629                        |
| 0.004496029                  | 0.863380605                  | 1.400460273                | 0.398762334                | 8.51E-05                   | 51.78240234                        |
| 0.017313698                  | 9.890660256                  | 9.755865427                | 0.060604616                | 0.000998243                | 33.61808472                        |
| 0.002354091                  | 1.586797236                  | 2.705819732                | 0.177873212                | 2.72E-05                   | 50.43126195                        |
| 0.013719598                  | 2.97704124                   | 3.515340823                | 0.162687624                | 0.000558587                | 53.02390917                        |
| 0.003783137                  | 4.361242416                  | 5.914706806                | 0.087764328                | 7.31E-05                   | 26.28733908                        |
| 0.002332312                  | 1.743173597                  | 2.705789336                | 0.159314379                | 3.07E-05                   | 37.49901305                        |
| 0.005804966                  | 1.943122539                  | 2.876236505                | 0.138294974                | 0.00012324                 | 35.16989803                        |
| 0.001417654                  | 0.120182204                  | 0.393649915                | 1.23689077                 | 7.35E-06                   | 48.31263779                        |
| 0.001100048                  | 0.16004493                   | 0.524850956                | 0.951751764                | 4.88E-06                   | 38.24599491                        |
| 0.000897647                  | 0.470606497                  | 1.415746399                | 0.346464044                | 6.03E-06                   | 20.30601217                        |
| 0.005706258                  | 4.1815815                    | 3.695598031                | 0.130620208                | 0.000237519                | 106.62698                          |
| 0.006314944                  | 3.751138759                  | 4.197982809                | 0.133342492                | 0.000224393                | 25.13437724                        |
| 0.009623866                  | 6.301442682                  | 4.972612699                | 0.099615103                | 0.000543232                | 25.18728568                        |
| 0.004075919                  | 3.034328754                  | 3.613080385                | 0.133632309                | 8.95E-05                   | 20.53897392                        |
| 0.00296177                   | 2.640386798                  | 4.246607203                | 0.110422982                | 5.07E-05                   | 25.29116737                        |
| 0.012941571                  | 1.95772849                   | 3.05974141                 | 0.084809813                | 0.000273843                | 81.74791745                        |
| 0.004788184                  | 6.052887126                  | 5.310353464                | 0.092986335                | 0.000154568                | 126.4937916                        |
| 0.002699025                  | 3.838478443                  | 6.011957474                | 0.08481079                 | 4.40E-05                   | 44.57036362                        |
| 0.040960058                  | 1.557872783                  | 3.190855048                | 0.164087979                | 0.001108581                | 34.44156956                        |
| 0.002011104                  | 0.5212873919                 | 0.527730605                | 0.823451282                | 1.66E-05                   | 42.79338972                        |
| 0.001379372                  | 1.569716327                  | 2.82961822                 | 0.169217881                | 1.50E-05                   | 17.15484512                        |
| 0.008131791                  | 0.728215128                  | 1.302184573                | 0.394577017                | 0.000136837                | 79.70400671                        |
| 0.004896183                  | 5.831568244                  | 7.526608815                | 0.063007214                | 0.000112537                | 38.32728928                        |
| 0.036864797                  | 1.531605119                  | 3.856085706                | 0.143024241                | 0.0006692                  | 39.66711457                        |
| 0.051408047                  | 4.244384616                  | 6.584946552                | 0.089519714                | 0.002340489                | 62.64888889                        |
| 0.001908526                  | 1.348570225                  | 2.741980326                | 0.192142205                | 1.73E-05                   | 54.41386629                        |
| 0.009079685                  | 8.425325875                  | 7.72564907                 | 0.06335719                 | 0.00043355                 | 80.94615357                        |
| 0.006335179                  | 4.407887931                  | 4.536909577                | 0.149698805                | 0.000248165                | 31.15865154                        |
| 0.001872824                  | 3.082056556                  | 5.154952549                | 0.100701601                | 2.02E-05                   | 25.17706141                        |
| 0.001285018                  | 1.003056539                  | 2.022667384                | 0.265578938                | 9.73E-06                   | 34.91320155                        |
| 0.024881715                  | 5.40640737                   | 6.068554148                | 0.079831275                | 0.001121874                | 167.0548517                        |
| 0.006299474                  | 5.201530067                  | 6.969974248                | 0.06079173                 | 0.000153831                | 36.28659269                        |
| 0.048661941                  | 3.00980191                   | 5.425142941                | 0.086824771                | 0.00169339                 | 76.16273382                        |
| 0.016969082                  | 1.792209354                  | 3.067875657                | 0.163127301                | 0.000314389                | 41.63266755                        |
| 0.009800231                  | 1.110070087                  | 2.241293029                | 0.188814442                | 0.000122883                | 74.32197209                        |

| wavelet.HLL_gldm_HighGrayLevelEmphasis | wavelet.HLL_gldm_GrayLevelNonUniformityNormalized | wavelet.HLL_gldm_DependenceEntropy | wavelet.HLL_gldm_DependenceNonUniformity | wavelet.HLL_gldm_GrayLevelNonUniformity |
|----------------------------------------|---------------------------------------------------|------------------------------------|------------------------------------------|-----------------------------------------|
| 824.3852691                            | 0.037364877                                       | 6.572946638                        | 234.3711048                              | 26.3796034                              |
| 913.8343765                            | 0.07082569                                        | 6.794886797                        | 374.9239287                              | 147.1049591                             |
| 319.4331797                            | 0.05522521                                        | 6.161975056                        | 119.0460829                              | 24.09677419                             |
| 1975.126755                            | 0.038597194                                       | 6.967854164                        | 777.0462998                              | 101.7036053                             |
| 657.632312                             | 0.066425617                                       | 6.199942489                        | 77.75208914                              | 23.84679666                             |
| 561.992224                             | 0.046750627                                       | 6.443942095                        | 173.9548989                              | 30.06065319                             |
| 332.5014837                            | 0.089628332                                       | 5.819737216                        | 70.115727                                | 30.20474777                             |
| 353.0698603                            | 0.049936056                                       | 6.384265488                        | 270.1676647                              | 50.03592814                             |
| 1732.331409                            | 0.038045773                                       | 6.829208282                        | 640.8797499                              | 79.0971621                              |
| 771.331827                             | 0.064600498                                       | 6.331867853                        | 734.1523564                              | 200.1323434                             |
| 221.1136638                            | 0.072912539                                       | 6.104608081                        | 180.4945586                              | 60.29866989                             |
| 1043.304318                            | 0.047267161                                       | 6.671276588                        | 405.1902834                              | 70.04993252                             |
| 1288.384282                            | 0.06783811                                        | 6.505495163                        | 418.0067502                              | 140.6962392                             |
| 625.4740608                            | 0.040237646                                       | 6.69817312                         | 316.4257603                              | 44.98568873                             |
| 1222.017563                            | 0.049220347                                       | 6.453152009                        | 258.7541164                              | 44.83973655                             |
| 2718.099467                            | 0.112809651                                       | 6.743966735                        | 929.7801929                              | 783.6886426                             |
| 650.9312321                            | 0.055213011                                       | 6.533333734                        | 166.5530086                              | 38.53868195                             |
| 464.9867067                            | 0.066874406                                       | 6.74572993                         | 420.0428816                              | 155.9511149                             |
| 1838.486254                            | 0.027337892                                       | 6.802389462                        | 225.8109966                              | 15.91065292                             |
| 247.2659764                            | 0.100153577                                       | 6.489396194                        | 403.3277401                              | 280.5301678                             |
| 1274.474158                            | 0.063774451                                       | 6.878269463                        | 1025.910796                              | 333.1577335                             |
| 296.2726744                            | 0.064144132                                       | 6.291394961                        | 413.6046512                              | 110.327907                              |
| 2219.748078                            | 0.041716002                                       | 6.882565252                        | 760.0640791                              | 113.9264006                             |
| 635.6694387                            | 0.049424925                                       | 6.167863506                        | 149.3742204                              | 23.77338877                             |
| 339.8197674                            | 0.072984846                                       | 6.264529448                        | 159.2043189                              | 87.87375415                             |
| 665.9063401                            | 0.06441379                                        | 6.325016754                        | 252.8818444                              | 44.70317003                             |
| 888.0467398                            | 0.066680563                                       | 6.582016641                        | 703.5862666                              | 231.1148298                             |
| 748.2533147                            | 0.064957251                                       | 6.380471541                        | 322.9762736                              | 93.0837404                              |
| 407.7501416                            | 0.047508286                                       | 6.592420544                        | 473.1983003                              | 83.85212465                             |
| 811.8764752                            | 0.061173389                                       | 6.951401628                        | 491.9378442                              | 155.5027537                             |
| 358.2733564                            | 0.065248004                                       | 6.426026487                        | 699.0100661                              | 207.4234036                             |
| 309.3988196                            | 0.096252343                                       | 6.422626955                        | 953.9696459                              | 570.7763912                             |
| 1626.080669                            | 0.034777136                                       | 6.897688814                        | 115.8273487                              | 70.70191835                             |
| 389.2788462                            | 0.049371302                                       | 5.349196208                        | 43.32692308                              | 5.134615385                             |
| 748.7228916                            | 0.044055741                                       | 6.118058563                        | 116.0903614                              | 14.62650602                             |
| 550.5589109                            | 0.045394569                                       | 6.784753267                        | 117.0891089                              | 91.6970297                              |
| 353.3826389                            | 0.063241705                                       | 6.573965693                        | 611.3354167                              | 182.1361111                             |
| 965.5304114                            | 0.049168678                                       | 6.766143281                        | 862.8479428                              | 164.9117472                             |
| 270.7520958                            | 0.078544229                                       | 6.085824031                        | 171.8742515                              | 65.58443114                             |
| 890.0867493                            | 0.042636275                                       | 6.738972348                        | 295.6920877                              | 44.72545281                             |
| 409.4192673                            | 0.069422224                                       | 6.262767101                        | 326.1953867                              | 102.3283582                             |
| 1186.712487                            | 0.039679193                                       | 6.706117478                        | 274.1647429                              | 37.81427072                             |
| 900.136419                             | 0.052914437                                       | 6.55856776                         | 404.0669915                              | 86.88550548                             |
| 576.2614634                            | 0.052990363                                       | 6.453199091                        | 258.5804878                              | 54.31512195                             |
| 517.1538871                            | 0.05913095                                        | 6.380253056                        | 462.0340788                              | 111.0479233                             |
| 691.7320467                            | 0.040706014                                       | 6.649843821                        | 678.3213645                              | 90.6929982                              |
| 1257.396156                            | 0.036092687                                       | 6.984740703                        | 1280.919362                              | 153.9714018                             |
| 366.2572899                            | 0.055880008                                       | 6.216592457                        | 158.4236707                              | 32.5780446                              |
| 1295.597015                            | 0.027177545                                       | 6.039605049                        | 61.8358209                               | 3.641791045                             |
| 307.4788732                            | 0.066349809                                       | 5.956209779                        | 130.778672                               | 32.97585513                             |
| 769.9459696                            | 0.055473595                                       | 6.777706253                        | 787.2908879                              | 189.9415888                             |
| 346.3397823                            | 0.055466284                                       | 6.717485602                        | 202.6275695                              | 45.87061669                             |
| 580.3344674                            | 0.057068127                                       | 6.582532294                        | 907.0492018                              | 218.0573148                             |
| 283.6700508                            | 0.066367767                                       | 6.158274871                        | 133.2098139                              | 39.22335025                             |
| 2223.186264                            | 0.089305172                                       | 6.758938924                        | 1049.065001                              | 582.5376361                             |
| 1272.930603                            | 0.029176552                                       | 6.794707689                        | 323.5665529                              | 25.64618885                             |
| 1394.886913                            | 0.055309883                                       | 6.745556395                        | 486.7391701                              | 121.2945736                             |
| 532.6597061                            | 0.06578764                                        | 6.281508312                        | 297.812065                               | 85.06341841                             |
| 784.1683047                            | 0.045237218                                       | 6.760623649                        | 214.0638821                              | 36.82309582                             |
| 389.3007946                            | 0.066768364                                       | 6.339715129                        | 184.4279228                              | 58.82292849                             |
| 1617.075035                            | 0.03939881                                        | 6.88613452                         | 613.0151015                              | 83.48607834                             |
| 664.7192406                            | 0.063008381                                       | 6.469759004                        | 1283.607886                              | 345.1599124                             |
| 467.5838188                            | 0.079828029                                       | 6.53323886                         | 573.6343042                              | 264.6686084                             |
| 1041.586964                            | 0.091496108                                       | 6.831681555                        | 390.6645917                              | 249.8758696                             |
| 329.9078341                            | 0.047972987                                       | 5.853534457                        | 73.15668203                              | 10.41013825                             |
| 1395.502898                            | 0.051410788                                       | 6.644727211                        | 395.8963297                              | 79.84095299                             |
| 714.5101523                            | 0.052912984                                       | 6.081417784                        | 121.8477157                              | 20.84771574                             |
| 2052.580857                            | 0.047843277                                       | 6.877907253                        | 769.3346888                              | 152.9549578                             |
| 623.1188341                            | 0.041484848                                       | 6.371860455                        | 138.0269058                              | 18.50224215                             |
| 602.7170562                            | 0.060249681                                       | 6.286959452                        | 524.1258081                              | 121.1621084                             |
| 1352.491776                            | 0.064855869                                       | 6.706310239                        | 605.7052632                              | 197.1618421                             |
| 650.7723649                            | 0.053844965                                       | 6.580300533                        | 269.6093888                              | 60.79096546                             |
| 1816.410991                            | 0.072124975                                       | 6.851862888                        | 959.4922601                              | 372.7418731                             |
| 1039.898749                            | 0.073676252                                       | 6.895171289                        | 1192.536331                              | 494.8097082                             |
| 839.4004357                            | 0.077651402                                       | 6.47048051                         | 1792.013072                              | 712.8398693                             |
| 1174.792115                            | 0.028962886                                       | 6.860362387                        | 403.7831541                              | 32.32258065                             |
| 327.7448523                            | 0.060464587                                       | 6.326333415                        | 266.8388541                              | 67.5389436                              |
| 309.6901369                            | 0.061762967                                       | 6.141862169                        | 159.452459                               | 37.67540984                             |
| 419.111678                             | 0.066609335                                       | 6.350272249                        | 382.6303855                              | 117.4988662                             |
| 386.7052003                            | 0.058646501                                       | 6.486453204                        | 678.9163739                              | 166.907941                              |
| 1187.970238                            | 0.037005543                                       | 6.580190496                        | 161.1031746                              | 18.65079365                             |
| 1655.706189                            | 0.02778598                                        | 6.779244687                        | 554.3855332                              | 37.26099925                             |
| 1201.520415                            | 0.045602561                                       | 6.513436921                        | 859.4340974                              | 127.3223496                             |
| 282.9931034                            | 0.064447087                                       | 5.756792091                        | 39.27586207                              | 9.344827586                             |
| 682.8192274                            | 0.04956978                                        | 6.690067551                        | 876.3376585                              | 168.0911236                             |
| 440.2923667                            | 0.076431334                                       | 6.410815115                        | 1040.41198                               | 418.5379839                             |
| 954.5861183                            | 0.036300315                                       | 6.627193165                        | 243.8354756                              | 28.24164524                             |
| 680.6166237                            | 0.046063775                                       | 6.592010396                        | 427.2590206                              | 71.49097938                             |
| 323.1202186                            | 0.049598376                                       | 5.767364167                        | 57.67759563                              | 9.076502732                             |
| 817.0666667                            | 0.044172336                                       | 5.535441351                        | 51.19047619                              | 4.638095238                             |
| 1739.06717                             | 0.050601353                                       | 6.952138836                        | 927.4196226                              | 201.1403774                             |
| 1731.998584                            | 0.035908321                                       | 6.637802084                        | 225.5240793                              | 25.35127479                             |
| 344.9892368                            | 0.053032885                                       | 6.378927975                        | 265.1800391                              | 54.19960861                             |
| 484.8863081                            | 0.067889838                                       | 6.791563596                        | 743.8176039                              | 277.6694377                             |
| 1290.65484                             | 0.064479011                                       | 6.846504315                        | 1102.397175                              | 374.3651395                             |
| 1778.458498                            | 0.026261932                                       | 6.374612587                        | 107.0869565                              | 6.644268775                             |
| 1020.574013                            | 0.056912494                                       | 6.4318551                          | 303.0888158                              | 69.20559211                             |
| 696.699187                             | 0.04236896                                        | 5.581350457                        | 55.47154472                              | 5.211382114                             |
| 438.5778364                            | 0.049045885                                       | 6.219270972                        | 105.9023747                              | 18.5883905                              |
| 1168.070632                            | 0.0467732                                         | 6.861621735                        | 193.228005                               | 37.74597274                             |

| wavelet.HLL_gldm_SmallDependenceEmphasis | wavelet.HLL_gldm_DependenceNonUniformityNormalized | wavelet.HLL_gldm_DependenceVariance | wavelet.HLL_gldm_LargeDependenceEmphasis |
|------------------------------------------|----------------------------------------------------|-------------------------------------|------------------------------------------|
| 0.565508653                              | 0.331970403                                        | 1.471675401                         | 5.21529745                               |
| 0.357731234                              | 0.180512243                                        | 7.56632156                          | 18.49735195                              |
| 0.479495073                              | 0.27429973                                         | 1.834462401                         | 6.686635945                              |
| 0.51939634                               | 0.294894231                                        | 2.592690861                         | 7.316508539                              |
| 0.370781608                              | 0.216579653                                        | 2.599359099                         | 9.646239554                              |
| 0.468053535                              | 0.27053639                                         | 1.617287743                         | 6.446345257                              |
| 0.37773011                               | 0.208058537                                        | 2.713134746                         | 10.02077151                              |
| 0.439204205                              | 0.269628408                                        | 1.358106143                         | 6.231536926                              |
| 0.519960022                              | 0.308263468                                        | 1.410690889                         | 5.447330447                              |
| 0.408235168                              | 0.236976229                                        | 2.248716242                         | 8.320852163                              |
| 0.37826404                               | 0.218252187                                        | 2.166695666                         | 8.881499395                              |
| 0.485951237                              | 0.273407749                                        | 2.215547433                         | 7.228070175                              |
| 0.338443107                              | 0.201546167                                        | 2.558349739                         | 10.35197686                              |
| 0.473875357                              | 0.283028408                                        | 1.430173355                         | 5.969588551                              |
| 0.479466828                              | 0.284033059                                        | 1.439059862                         | 5.950603732                              |
| 0.300972365                              | 0.133839095                                        | 11.57938521                         | 29.14884123                              |
| 0.448797496                              | 0.238614625                                        | 2.461449413                         | 8.421203438                              |
| 0.330120932                              | 0.180121304                                        | 4.262902742                         | 13.81132075                              |
| 0.626867215                              | 0.387991403                                        | 1.198202666                         | 4.281786942                              |
| 0.271029585                              | 0.143994195                                        | 7.824639056                         | 22.43662978                              |
| 0.398865629                              | 0.196384149                                        | 5.50957121                          | 14.50957121                              |
| 0.395313147                              | 0.24046782                                         | 1.776028935                         | 7.665116279                              |
| 0.498176113                              | 0.278309806                                        | 2.45576689                          | 7.413767851                              |
| 0.493370293                              | 0.310549315                                        | 0.983017881                         | 4.908523909                              |
| 0.383843259                              | 0.215285979                                        | 2.650795797                         | 9.617940199                              |
| 0.412065363                              | 0.220290842                                        | 2.527020405                         | 9.149855908                              |
| 0.358639288                              | 0.202996615                                        | 3.194753485                         | 11.04962493                              |
| 0.407400045                              | 0.225384699                                        | 2.128522724                         | 8.41521284                               |
| 0.463696994                              | 0.26810102                                         | 1.659351732                         | 6.569405099                              |
| 0.399007504                              | 0.193523936                                        | 7.469333142                         | 17.55782848                              |
| 0.388087545                              | 0.219883632                                        | 2.365705027                         | 9.040264234                              |
| 0.283826987                              | 0.160871778                                        | 5.709533654                         | 17.66037099                              |
| 0.519396876                              | 0.302915568                                        | 1.297878173                         | 5.355140187                              |
| 0.636017628                              | 0.41660503                                         | 0.529215976                         | 3.076923077                              |
| 0.578246319                              | 0.349669763                                        | 1.177892292                         | 4.620481928                              |
| 0.443487963                              | 0.255984707                                        | 2.043980982                         | 7.34653465                               |
| 0.385843555                              | 0.212269242                                        | 2.793980999                         | 9.901388889                              |
| 0.460631756                              | 0.257259375                                        | 2.971568049                         | 8.729278473                              |
| 0.350094002                              | 0.205837427                                        | 2.322802539                         | 9.732934132                              |
| 0.493247943                              | 0.281879969                                        | 2.164071098                         | 7.034318398                              |
| 0.403526069                              | 0.221299448                                        | 2.607118595                         | 9.267299864                              |
| 0.486623082                              | 0.287685984                                        | 1.360241971                         | 5.751311647                              |
| 0.419634436                              | 0.246082212                                        | 1.795502054                         | 7.384896468                              |
| 0.435813993                              | 0.252273647                                        | 1.7650884                           | 7.124878049                              |
| 0.410355748                              | 0.246024536                                        | 1.716750537                         | 7.336528222                              |
| 0.510152425                              | 0.304453036                                        | 1.222581701                         | 5.247755835                              |
| 0.524745927                              | 0.300262392                                        | 1.604065684                         | 5.828410689                              |
| 0.466949191                              | 0.271738715                                        | 1.524221143                         | 6.30703259                               |
| 0.670916252                              | 0.461464135                                        | 0.443974159                         | 2.71641791                               |
| 0.462240321                              | 0.263136161                                        | 1.642636503                         | 6.621730382                              |
| 0.417279997                              | 0.229933086                                        | 3.364606079                         | 10.05432243                              |
| 0.407982963                              | 0.245015199                                        | 1.799762841                         | 7.503022975                              |
| 0.408304717                              | 0.237385292                                        | 2.48416275                          | 8.643548809                              |
| 0.367466514                              | 0.225397316                                        | 1.948986633                         | 8.485617597                              |
| 0.330410742                              | 0.160825541                                        | 6.264735198                         | 18.0455312                               |
| 0.584188699                              | 0.368107569                                        | 0.852543419                         | 3.941979522                              |
| 0.391595218                              | 0.221951286                                        | 2.472432598                         | 9.131326949                              |
| 0.405089545                              | 0.230326423                                        | 1.986291824                         | 8.099767981                              |
| 0.506890643                              | 0.262977742                                        | 3.979293567                         | 10.12530713                              |
| 0.385131639                              | 0.209339299                                        | 2.609012821                         | 9.742338252                              |
| 0.500833184                              | 0.289294526                                        | 1.549782736                         | 5.957999056                              |
| 0.417923542                              | 0.234320534                                        | 2.313327658                         | 8.411829135                              |
| 0.356577663                              | 0.18564217                                         | 5.143892502                         | 14.69579288                              |
| 0.310745298                              | 0.143048184                                        | 9.962208319                         | 25.3156353                               |
| 0.559805428                              | 0.337127567                                        | 1.037439742                         | 4.520737327                              |
| 0.468294249                              | 0.254923586                                        | 2.143454975                         | 7.549903413                              |
| 0.513559271                              | 0.309258162                                        | 1.18771419                          | 5.147208122                              |
| 0.440434265                              | 0.240642693                                        | 2.625397266                         | 8.600875821                              |
| 0.506915172                              | 0.309477367                                        | 1.116410947                         | 5.062780269                              |
| 0.432427811                              | 0.260629442                                        | 1.547754382                         | 6.691695674                              |
| 0.381878588                              | 0.199245152                                        | 3.646197628                         | 11.66776316                              |
| 0.414185027                              | 0.23880371                                         | 2.18306331                          | 8.155004429                              |
| 0.383131672                              | 0.185660267                                        | 6.042201833                         | 15.87809598                              |
| 0.362437643                              | 0.177566458                                        | 6.394959225                         | 16.92167957                              |
| 0.364666229                              | 0.195208396                                        | 4.239208851                         | 12.82832244                              |
| 0.579863219                              | 0.361812862                                        | 0.873556352                         | 4.034050179                              |
| 0.40967807                               | 0.238888858                                        | 1.864892613                         | 7.694717995                              |
| 0.437311904                              | 0.261397474                                        | 1.725944639                         | 6.88852459                               |
| 0.378096443                              | 0.216910649                                        | 2.130245371                         | 8.853741497                              |
| 0.405342547                              | 0.23855108                                         | 1.963790829                         | 7.886156008                              |
| 0.543511061                              | 0.319649156                                        | 1.323822121                         | 5.166666667                              |
| 0.638724625                              | 0.413412031                                        | 0.620193396                         | 3.226696495                              |
| 0.524399096                              | 0.307820235                                        | 1.228361733                         | 5.179799427                              |
| 0.428114943                              | 0.270868014                                        | 1.375790725                         | 6.337931034                              |
| 0.450531077                              | 0.258430451                                        | 1.837743342                         | 7.048953111                              |
| 0.332738264                              | 0.189994883                                        | 2.892891673                         | 11.32578524                              |
| 0.531911407                              | 0.313413208                                        | 1.266691338                         | 5.164524422                              |
| 0.451234756                              | 0.275295761                                        | 1.409461686                         | 6.163659794                              |
| 0.544125683                              | 0.315178118                                        | 1.393173878                         | 5.327868852                              |
| 0.715277778                              | 0.487528345                                        | 0.535147392                         | 2.714285714                              |
| 0.435653446                              | 0.233313113                                        | 3.982582967                         | 10.83446541                              |
| 0.537050283                              | 0.319439206                                        | 1.218643918                         | 5.028328612                              |
| 0.447777617                              | 0.259471663                                        | 1.568364858                         | 6.641878669                              |
| 0.351658295                              | 0.181862495                                        | 5.861001548                         | 15.85525672                              |
| 0.37265644                               | 0.189872059                                        | 4.663038782                         | 13.61350327                              |
| 0.660827844                              | 0.423268603                                        | 0.787857957                         | 3.42687747                               |
| 0.4279969                                | 0.249250671                                        | 1.84502413                          | 7.353618421                              |
| 0.670110659                              | 0.450988168                                        | 0.460969                            | 2.772357724                              |
| 0.449804654                              | 0.279425791                                        | 1.205853482                         | 5.807387863                              |
| 0.472509555                              | 0.239439907                                        | 3.486251802                         | 10.0086741                               |

| wavelet.HLL_gldm_LargeDependenceLowGrayLevelEmphasis | wavelet.HLL_gldm_SmallDependenceHighGrayLevelEmphasis | wavelet.HLL_gldm_LargeDependenceHighGrayLevelEmphasis |
|------------------------------------------------------|-------------------------------------------------------|-------------------------------------------------------|
| 0.010950341                                          | 486.7908472                                           | 4005.263456                                           |
| 0.022803015                                          | 346.0070556                                           | 16009.57535                                           |
| 0.031693932                                          | 164.5950398                                           | 1855.534562                                           |
| 0.00456608                                           | 1047.069189                                           | 13781.06755                                           |
| 0.020649343                                          | 259.519432                                            | 5983.983287                                           |
| 0.016840647                                          | 270.4492328                                           | 3343.329705                                           |
| 0.038168717                                          | 123.796028                                            | 3352.928783                                           |
| 0.026668449                                          | 162.7987832                                           | 2157.443114                                           |
| 0.004121074                                          | 905.3218314                                           | 9339.666667                                           |
| 0.012042272                                          | 325.5717784                                           | 6222.956101                                           |
| 0.052105517                                          | 85.82253472                                           | 1866.371221                                           |
| 0.008887971                                          | 535.3992613                                           | 6982.92915                                            |
| 0.008980629                                          | 443.427149                                            | 13072.73915                                           |
| 0.015591394                                          | 303.8303703                                           | 3454.872987                                           |
| 0.006523799                                          | 596.3384819                                           | 7169.468716                                           |
| 0.011222915                                          | 833.8926389                                           | 77090.44235                                           |
| 0.01719479                                           | 313.292658                                            | 4991.56447                                            |
| 0.034678164                                          | 168.3045374                                           | 6129.340051                                           |
| 0.017319367                                          | 1208.240532                                           | 7178.273196                                           |
| 0.100556673                                          | 71.50963229                                           | 5397.429489                                           |
| 0.012272991                                          | 526.193889                                            | 18057.58633                                           |
| 0.035623099                                          | 121.1004817                                           | 2182.340116                                           |
| 0.004047883                                          | 1104.114436                                           | 16018.86708                                           |
| 0.012161112                                          | 324.5824971                                           | 3003.528067                                           |
| 0.034464002                                          | 140.4608824                                           | 3059.685216                                           |
| 0.016557578                                          | 281.9838139                                           | 6052.646974                                           |
| 0.013527556                                          | 326.5171956                                           | 9640.233699                                           |
| 0.01324994                                           | 318.5850898                                           | 6083.414515                                           |
| 0.028986819                                          | 203.0359332                                           | 2399.517847                                           |
| 0.025106491                                          | 347.0714497                                           | 13150.5295                                            |
| 0.030347105                                          | 143.976911                                            | 3163.495753                                           |
| 0.062725653                                          | 93.2707702                                            | 5294.677066                                           |
| 0.004497783                                          | 875.1778284                                           | 8352.729956                                           |
| 0.022734064                                          | 255.8426816                                           | 1160.721154                                           |
| 0.010370729                                          | 419.3046821                                           | 3549.192771                                           |
| 0.019929272                                          | 252.9509016                                           | 3829.429208                                           |
| 0.038164907                                          | 147.1156346                                           | 3330.5                                                |
| 0.010660174                                          | 450.3216011                                           | 8079.413536                                           |
| 0.042416143                                          | 98.00494479                                           | 2616.572455                                           |
| 0.010933658                                          | 450.6360011                                           | 6139.526215                                           |
| 0.026122978                                          | 172.6911983                                           | 3694.578019                                           |
| 0.006964614                                          | 584.032191                                            | 6617.975866                                           |
| 0.009962354                                          | 392.33058                                             | 6409.426309                                           |
| 0.015855711                                          | 253.1499501                                           | 4078.413659                                           |
| 0.016564609                                          | 214.813087                                            | 3814.49148                                            |
| 0.011516095                                          | 363.8206709                                           | 3498.301167                                           |
| 0.00619767                                           | 677.4716091                                           | 7014.865448                                           |
| 0.026247332                                          | 179.72315                                             | 2176.679245                                           |
| 0.013970524                                          | 944.2902674                                           | 3266.19403                                            |
| 0.027086712                                          | 141.8178597                                           | 2103.812877                                           |
| 0.015572402                                          | 339.1569669                                           | 7446.554614                                           |
| 0.030005063                                          | 141.7330954                                           | 2506.259976                                           |
| 0.01758275                                           | 243.4850673                                           | 4870.239728                                           |
| 0.041972935                                          | 109.1131765                                           | 2241.010152                                           |
| 0.008680076                                          | 759.9592586                                           | 38841.71271                                           |
| 0.007433568                                          | 758.0053622                                           | 4889.683732                                           |
| 0.00757944                                           | 554.1568537                                           | 12391.26083                                           |
| 0.017923378                                          | 218.240671                                            | 4314.877804                                           |
| 0.017788377                                          | 417.1825143                                           | 7539.143735                                           |
| 0.032002256                                          | 157.4418572                                           | 3584.034052                                           |
| 0.004849142                                          | 831.378891                                            | 9214.822086                                           |
| 0.014379437                                          | 285.3596208                                           | 5418.816356                                           |
| 0.036297496                                          | 175.2124538                                           | 6375.00712                                            |
| 0.026507869                                          | 336.1425076                                           | 25139.96412                                           |
| 0.065204909                                          | 200.9137391                                           | 1351.751152                                           |
| 0.006680218                                          | 657.6397904                                           | 10339.68448                                           |
| 0.010884073                                          | 371.745732                                            | 3647.200508                                           |
| 0.004859056                                          | 924.4332132                                           | 16988.45449                                           |
| 0.013473841                                          | 317.7007972                                           | 3194.235426                                           |
| 0.013604421                                          | 276.5405971                                           | 3818.573844                                           |
| 0.009610044                                          | 533.7917931                                           | 15347.29046                                           |
| 0.02237759                                           | 284.4031769                                           | 5066.136404                                           |
| 0.009346277                                          | 715.7355862                                           | 28343.59327                                           |
| 0.017863598                                          | 397.9676447                                           | 16750.10602                                           |
| 0.016286047                                          | 315.3075825                                           | 10478.45207                                           |
| 0.00615352                                           | 684.2996001                                           | 4624.801075                                           |
| 0.033662614                                          | 142.7559127                                           | 2332.636526                                           |
| 0.059203285                                          | 148.4344758                                           | 1934.113115                                           |
| 0.025399292                                          | 168.8760104                                           | 3545.234127                                           |
| 0.026925861                                          | 165.1800878                                           | 2901.639143                                           |
| 0.008016433                                          | 634.7120619                                           | 6113.367063                                           |
| 0.003452782                                          | 1074.29427                                            | 5225.093214                                           |
| 0.005210114                                          | 646.9859908                                           | 6064.28904                                            |
| 0.075364259                                          | 136.6253429                                           | 1682.055172                                           |
| 0.013574005                                          | 323.1003389                                           | 4394.517252                                           |
| 0.028758518                                          | 151.7205797                                           | 4827.892075                                           |
| 0.008585144                                          | 528.4301323                                           | 4611.051414                                           |
| 0.012163317                                          | 312.2891049                                           | 4043.612758                                           |
| 0.031976802                                          | 184.3167881                                           | 1656.355191                                           |
| 0.016177432                                          | 582.4401455                                           | 2179.428571                                           |
| 0.006993078                                          | 761.770948                                            | 18249.96327                                           |
| 0.004806494                                          | 961.4170015                                           | 8312.483003                                           |
| 0.027735057                                          | 156.0366149                                           | 2243.136008                                           |
| 0.037700411                                          | 182.5851777                                           | 7203.956235                                           |
| 0.011435196                                          | 499.7531691                                           | 16988.4485                                            |
| 0.007496989                                          | 1235.746955                                           | 5851.217391                                           |
| 0.008661463                                          | 439.7519127                                           | 7414.942434                                           |
| 0.017678844                                          | 438.7554765                                           | 2087.056911                                           |
| 0.022746285                                          | 207.3872426                                           | 2482.757256                                           |
| 0.011178011                                          | 588.745219                                            | 11253.81289                                           |

| wavelet.HLL_gldm_SmallDependenceLowGrayLevelEmphasis | wavelet.HLL_gldm_LowGrayLevelEmphasis | wavelet.HLL_gldm_DistanceZoneVariabilityNormalized | wavelet.HLL_gldm_LowIntensityEmphasis |
|------------------------------------------------------|---------------------------------------|----------------------------------------------------|---------------------------------------|
| 0.003118025                                          | 0.003901774                           | 0.926355409                                        | 0.005154414                           |
| 0.001159145                                          | 0.001964291                           | 0.901720447                                        | 0.003011907                           |
| 0.005518377                                          | 0.007687428                           | 0.905                                              | 0.010548494                           |
| 0.000734138                                          | 0.001011863                           | 0.870073066                                        | 0.001306781                           |
| 0.003845921                                          | 0.005092829                           | 0.963203125                                        | 0.009052806                           |
| 0.002997106                                          | 0.004194103                           | 0.856866825                                        | 0.005829797                           |
| 0.007541279                                          | 0.009595012                           | 0.738147193                                        | 0.018264534                           |
| 0.004221108                                          | 0.006582248                           | 0.893914128                                        | 0.008894732                           |
| 0.000917231                                          | 0.001244444                           | 0.920926772                                        | 0.001616914                           |
| 0.00095628                                           | 0.001798899                           | 0.936895161                                        | 0.002234772                           |
| 0.004550746                                          | 0.008171208                           | 0.928864282                                        | 0.011522309                           |
| 0.001367923                                          | 0.001955476                           | 0.889400425                                        | 0.00262242                            |
| 0.000770258                                          | 0.001311497                           | 0.922362993                                        | 0.002109678                           |
| 0.00263491                                           | 0.003886191                           | 0.917584304                                        | 0.005081556                           |
| 0.001603578                                          | 0.002081934                           | 0.862083814                                        | 0.003005761                           |
| 0.000265149                                          | 0.000529628                           | 0.905578365                                        | 0.000828495                           |
| 0.002523496                                          | 0.003554535                           | 0.805945764                                        | 0.005252046                           |
| 0.001391838                                          | 0.003157065                           | 0.979096409                                        | 0.004095332                           |
| 0.001456822                                          | 0.004390766                           | 0.806322207                                        | 0.003443279                           |
| 0.002788801                                          | 0.006297083                           | 0.958400299                                        | 0.009810925                           |
| 0.000604626                                          | 0.001128257                           | 0.904807303                                        | 0.001458118                           |
| 0.003805387                                          | 0.006776897                           | 0.886268405                                        | 0.009221025                           |
| 0.000717525                                          | 0.000960136                           | 0.923389468                                        | 0.001321085                           |
| 0.00357615                                           | 0.004602061                           | 0.734330237                                        | 0.006496654                           |
| 0.002512647                                          | 0.004697905                           | 0.891075545                                        | 0.006245436                           |
| 0.002378618                                          | 0.003374828                           | 0.975834432                                        | 0.005289769                           |
| 0.000766247                                          | 0.001549452                           | 0.870944272                                        | 0.002041544                           |
| 0.001418379                                          | 0.002305589                           | 0.944081726                                        | 0.003263322                           |
| 0.002387438                                          | 0.005192251                           | 0.948700923                                        | 0.005495614                           |
| 0.001227659                                          | 0.002116962                           | 0.923391522                                        | 0.002909741                           |
| 0.00213234                                           | 0.004256327                           | 0.954694708                                        | 0.005284206                           |
| 0.001431862                                          | 0.004121625                           | 0.958134348                                        | 0.005014887                           |
| 0.000945111                                          | 0.001318254                           | 0.929581351                                        | 0.001702017                           |
| 0.012918116                                          | 0.014473609                           | 0.811163439                                        | 0.018296938                           |
| 0.004496567                                          | 0.005130795                           | 0.849127416                                        | 0.007009553                           |
| 0.002245367                                          | 0.003770449                           | 0.888679273                                        | 0.004778661                           |
| 0.00321754                                           | 0.00580158                            | 0.96413054                                         | 0.008091226                           |
| 0.001116888                                          | 0.001766067                           | 0.919324355                                        | 0.002273255                           |
| 0.003653684                                          | 0.006465686                           | 0.858784801                                        | 0.009853877                           |
| 0.002275616                                          | 0.003047126                           | 0.954422222                                        | 0.004234529                           |
| 0.002309934                                          | 0.003993567                           | 0.879979022                                        | 0.005500945                           |
| 0.001790927                                          | 0.002301245                           | 0.907691022                                        | 0.003322932                           |
| 0.001320504                                          | 0.002056033                           | 0.898517422                                        | 0.00289287                            |
| 0.002438084                                          | 0.003648471                           | 0.844546146                                        | 0.005170816                           |
| 0.001693419                                          | 0.003029575                           | 0.869974541                                        | 0.003938115                           |
| 0.001874251                                          | 0.003007641                           | 0.951105635                                        | 0.003568897                           |
| 0.000978163                                          | 0.001489392                           | 0.82999841                                         | 0.0017881                             |
| 0.005131888                                          | 0.00718632                            | 0.943086929                                        | 0.010265491                           |
| 0.008742585                                          | 0.009706866                           | 0.792387543                                        | 0.01187668                            |
| 0.004680041                                          | 0.006784506                           | 0.832426036                                        | 0.009491031                           |
| 0.001318353                                          | 0.002266688                           | 0.943676308                                        | 0.002992224                           |
| 0.003774763                                          | 0.006101869                           | 0.960116284                                        | 0.008570053                           |
| 0.001452371                                          | 0.002674212                           | 0.925485247                                        | 0.003386687                           |
| 0.004199252                                          | 0.007227063                           | 0.90997582                                         | 0.010575103                           |
| 0.0003565                                            | 0.000672665                           | 0.963218158                                        | 0.001017564                           |
| 0.002490254                                          | 0.003190567                           | 0.8235172                                          | 0.003964873                           |
| 0.000865941                                          | 0.001334488                           | 0.793837472                                        | 0.002017947                           |
| 0.001938388                                          | 0.003244243                           | 0.783755556                                        | 0.004513854                           |
| 0.003851423                                          | 0.004647182                           | 0.907972467                                        | 0.007065187                           |
| 0.003059219                                          | 0.005048692                           | 0.974231197                                        | 0.007482063                           |
| 0.000992177                                          | 0.001349748                           | 0.928556331                                        | 0.001825466                           |
| 0.001034517                                          | 0.002041224                           | 0.933930974                                        | 0.002412523                           |
| 0.001450865                                          | 0.003060743                           | 0.969967459                                        | 0.003932051                           |
| 0.000894062                                          | 0.001613871                           | 0.9563627                                          | 0.002708617                           |
| 0.006615338                                          | 0.016723457                           | 0.892244898                                        | 0.014985928                           |
| 0.001286274                                          | 0.001699131                           | 0.884268689                                        | 0.002512866                           |
| 0.003469679                                          | 0.004288572                           | 0.785358784                                        | 0.006190489                           |
| 0.000560999                                          | 0.000857613                           | 0.955093553                                        | 0.001181515                           |
| 0.004042198                                          | 0.005148353                           | 0.865479867                                        | 0.007212181                           |
| 0.001510128                                          | 0.002626299                           | 0.925113847                                        | 0.003315322                           |
| 0.000778861                                          | 0.001274922                           | 0.910149344                                        | 0.001899973                           |
| 0.001545639                                          | 0.004034464                           | 0.926035503                                        | 0.004442871                           |
| 0.000508547                                          | 0.000876507                           | 0.946106856                                        | 0.001262542                           |
| 0.000645594                                          | 0.00133315                            | 0.933996309                                        | 0.001714143                           |
| 0.000619363                                          | 0.001435166                           | 0.953406508                                        | 0.001661964                           |
| 0.001832694                                          | 0.002393741                           | 0.820431412                                        | 0.00294399                            |
| 0.004312792                                          | 0.006885705                           | 0.86757671                                         | 0.00979006                            |
| 0.004006953                                          | 0.010582111                           | 0.907625601                                        | 0.009908872                           |
| 0.001979393                                          | 0.003735567                           | 0.875862947                                        | 0.004996568                           |
| 0.002599089                                          | 0.004584752                           | 0.897952279                                        | 0.006039902                           |
| 0.003378433                                          | 0.003869195                           | 0.827664399                                        | 0.00563551                            |
| 0.001454888                                          | 0.001741143                           | 0.808209822                                        | 0.002106754                           |
| 0.000908628                                          | 0.001357788                           | 0.907856184                                        | 0.001639475                           |
| 0.018320253                                          | 0.024160024                           | 0.771468144                                        | 0.036855804                           |
| 0.001391841                                          | 0.002414521                           | 0.957045517                                        | 0.002926356                           |
| 0.001273357                                          | 0.002974792                           | 0.832575316                                        | 0.003721487                           |
| 0.002518688                                          | 0.003147684                           | 0.925423603                                        | 0.004373723                           |
| 0.001586633                                          | 0.002610414                           | 0.868376642                                        | 0.003252212                           |
| 0.01235953                                           | 0.014517018                           | 0.854570637                                        | 0.020567544                           |
| 0.013242151                                          | 0.013660549                           | 0.845550878                                        | 0.016895313                           |
| 0.000613439                                          | 0.00096513                            | 0.89536017                                         | 0.001310662                           |
| 0.001810473                                          | 0.00212633                            | 0.95518054                                         | 0.003025369                           |
| 0.005660022                                          | 0.007724355                           | 0.875994225                                        | 0.011497492                           |
| 0.001352997                                          | 0.002959318                           | 0.933766555                                        | 0.003718194                           |
| 0.000532842                                          | 0.001062509                           | 0.931505925                                        | 0.00137584                            |
| 0.004869887                                          | 0.00524399                            | 0.737939318                                        | 0.006721842                           |
| 0.001459251                                          | 0.00206456                            | 0.957116329                                        | 0.003130426                           |
| 0.014064169                                          | 0.014653549                           | 0.806238185                                        | 0.018998946                           |
| 0.004797628                                          | 0.006783797                           | 0.767011834                                        | 0.009430341                           |
| 0.002049493                                          | 0.002612722                           | 0.865051026                                        | 0.004019328                           |



| wavelet.HLL_gldzm_LargeDistanceEmphasis | wavelet.HLL_gldzm_HighIntensitySmallDistanceEmphasis | wavelet.HLL_gldzm_LowIntensityLargeDistanceEmphasis | wavelet.HLL_gldzm_HighIntensityEmphasis |
|-----------------------------------------|------------------------------------------------------|-----------------------------------------------------|-----------------------------------------|
| 1.114864865                             | 839.5202703                                          | 0.005533385                                         | 857.5135135                             |
| 1.155477032                             | 921.7759128                                          | 0.003515342                                         | 962.5382803                             |
| 1.15                                    | 329.8145833                                          | 0.012489566                                         | 341.7458333                             |
| 1.20952381                              | 1898.501587                                          | 0.001452234                                         | 2011.47873                              |
| 1.05625                                 | 679.9078125                                          | 0.009129367                                         | 691.48125                               |
| 1.232758621                             | 543.7104885                                          | 0.006439035                                         | 583.2816092                             |
| 1.464788732                             | 292.7940141                                          | 0.01444972                                          | 332.2323944                             |
| 1.168604651                             | 350.4118217                                          | 0.009832228                                         | 368.4728682                             |
| 1.12371134                              | 1672.711538                                          | 0.001690389                                         | 1738.607454                             |
| 1.097848716                             | 778.0950729                                          | 0.00240253                                          | 796.3636364                             |
| 1.110795455                             | 220.2634943                                          | 0.01292794                                          | 225.9886364                             |
| 1.17625459                              | 1045.074969                                          | 0.002989318                                         | 1096.567931                             |
| 1.12136536                              | 1281.406448                                          | 0.00224399                                          | 1316.865992                             |
| 1.129186603                             | 619.2691388                                          | 0.005420121                                         | 644.7894737                             |
| 1.223529412                             | 1150.366667                                          | 0.003180981                                         | 1234.22549                              |
| 1.149036403                             | 2676.975696                                          | 0.000890183                                         | 2781.359315                             |
| 1.326647564                             | 639.3345272                                          | 0.005875132                                         | 697.8624642                             |
| 1.031690141                             | 505.2664319                                          | 0.004267773                                         | 510.0199531                             |
| 1.325925926                             | 1730.296296                                          | 0.003772072                                         | 1914.874074                             |
| 1.063754427                             | 261.1410862                                          | 0.010168657                                         | 266.94451                               |
| 1.150321199                             | 1266.491649                                          | 0.001604745                                         | 1316.736188                             |
| 1.181588903                             | 292.8064313                                          | 0.011779951                                         | 304.9407314                             |
| 1.11969112                              | 2161.531532                                          | 0.001385431                                         | 2231.633848                             |
| 1.47311828                              | 587.6075269                                          | 0.01003314                                          | 653.655914                              |
| 1.173410405                             | 346.305395                                           | 0.006856272                                         | 363.8863198                             |
| 1.036697248                             | 675.2247706                                          | 0.005389087                                         | 679.5504587                             |
| 1.208005718                             | 859.8057541                                          | 0.002331406                                         | 911.1515368                             |
| 1.086363636                             | 760.6371212                                          | 0.003401724                                         | 776.3075758                             |
| 1.079030558                             | 427.9494204                                          | 0.006314338                                         | 434.28451                               |
| 1.119687771                             | 836.5956201                                          | 0.003127447                                         | 865.5516045                             |
| 1.069571328                             | 363.522312                                           | 0.005724161                                         | 369.9908644                             |
| 1.064171123                             | 324.4122995                                          | 0.005320604                                         | 329.8572193                             |
| 1.109634551                             | 1634.768895                                          | 0.001817052                                         | 1673.456811                             |
| 1.315789474                             | 357.6513158                                          | 0.021971597                                         | 393.6710526                             |
| 1.246575342                             | 696.6381279                                          | 0.007722773                                         | 732.4840183                             |
| 1.177480916                             | 542.2156489                                          | 0.00668966                                          | 571.726145                              |
| 1.054805401                             | 371.7225973                                          | 0.008433448                                         | 377.1262907                             |
| 1.12633352                              | 955.504913                                           | 0.002605741                                         | 983.9859629                             |
| 1.229357798                             | 264.9633028                                          | 0.012446431                                         | 280.1926606                             |
| 1.07                                    | 888.215                                              | 0.004350782                                         | 905.845                                 |
| 1.192366412                             | 406.7022901                                          | 0.006251131                                         | 425.751145                              |
| 1.145522388                             | 1166.395522                                          | 0.003578184                                         | 1205.255597                             |
| 1.16084788                              | 893.0508105                                          | 0.003214091                                         | 929.6783042                             |
| 1.254826255                             | 541.4416023                                          | 0.005816718                                         | 579.4382239                             |
| 1.209695603                             | 491.7547914                                          | 0.008008949                                         | 517.9751973                             |
| 1.075227964                             | 691.1441869                                          | 0.003695705                                         | 707.81231                               |
| 1.281397174                             | 1194.171115                                          | 0.002215829                                         | 1288.728807                             |
| 1.087947883                             | 372.5993485                                          | 0.010762628                                         | 385.0488599                             |
| 1.352941176                             | 1265.982843                                          | 0.012793531                                         | 1364.166667                             |
| 1.276923077                             | 282.6375                                             | 0.011145917                                         | 305.7692308                             |
| 1.087009063                             | 790.6259819                                          | 0.003293972                                         | 804.5619335                             |
| 1.061068702                             | 345.9166667                                          | 0.008795073                                         | 352.697201                              |
| 1.11627907                              | 578.6839701                                          | 0.003842381                                         | 595.1760797                             |
| 1.141732283                             | 291.1604331                                          | 0.011934852                                         | 298.0669291                             |
| 1.056226572                             | 2264.450854                                          | 0.001040441                                         | 2304.48105                              |
| 1.293423272                             | 1191.96796                                           | 0.004447538                                         | 1288.150084                             |
| 1.350100604                             | 1304.929074                                          | 0.002355074                                         | 1419.012072                             |
| 1.37                                    | 486.05125                                            | 0.005734032                                         | 534.57                                  |
| 1.145054945                             | 798.4263736                                          | 0.007543331                                         | 820.7912088                             |
| 1.039164491                             | 406.4608355                                          | 0.007655671                                         | 409.9582245                             |
| 1.111294312                             | 1608.756183                                          | 0.001912971                                         | 1658.047815                             |
| 1.102613374                             | 668.3261914                                          | 0.002767209                                         | 681.4938509                             |
| 1.045746388                             | 483.1711477                                          | 0.004003859                                         | 491.9020867                             |
| 1.066950053                             | 1070.024708                                          | 0.002797315                                         | 1086.858661                             |
| 1.171428571                             | 337.3785714                                          | 0.016583173                                         | 351.8                                   |
| 1.185006046                             | 1347.493954                                          | 0.006365216                                         | 1408.116082                             |
| 1.366812227                             | 657.5709607                                          | 0.007063742                                         | 721.8908297                             |
| 1.068944099                             | 2049.630745                                          | 0.001211385                                         | 2100.87764                              |
| 1.217557252                             | 593.8053435                                          | 0.008464575                                         | 626.0725191                             |
| 1.116883117                             | 612.3189311                                          | 0.003628898                                         | 631.6353646                             |
| 1.141444867                             | 1353.551901                                          | 0.002091876                                         | 1398.419011                             |
| 1.115384615                             | 648.4061355                                          | 0.004603163                                         | 680.7289377                             |
| 1.083144025                             | 1828.345979                                          | 0.001318417                                         | 1866.527488                             |
| 1.102508179                             | 1053.665031                                          | 0.001811615                                         | 1093.808433                             |
| 1.071599045                             | 847.8865023                                          | 0.001779871                                         | 863.5937417                             |
| 1.299191375                             | 1110.997978                                          | 0.003777087                                         | 1181.706199                             |
| 1.213883677                             | 326.6669794                                          | 0.011614126                                         | 346.4371482                             |
| 1.145631068                             | 330.987055                                           | 0.012456923                                         | 337.9967638                             |
| 1.199468085                             | 419.4341755                                          | 0.005703269                                         | 443.5079787                             |
| 1.161797753                             | 392.2411985                                          | 0.009464559                                         | 405.3895131                             |
| 1.285714286                             | 1095.057937                                          | 0.005999072                                         | 1175.774603                             |
| 1.32231405                              | 1537.438791                                          | 0.002453076                                         | 1680.672521                             |
| 1.145248057                             | 1181.082935                                          | 0.001856907                                         | 1225.860132                             |
| 1.394736842                             | 277.0559211                                          | 0.088938564                                         | 307.1447368                             |
| 1.065878378                             | 706.6739865                                          | 0.003068262                                         | 717.6891892                             |
| 1.276648488                             | 423.9044373                                          | 0.006315837                                         | 458.826475                              |
| 1.11637931                              | 977.091056                                           | 0.004645011                                         | 993.0883621                             |
| 1.212484994                             | 659.2121849                                          | 0.003800006                                         | 693.3421369                             |
| 1.236842105                             | 318.7171053                                          | 0.022479345                                         | 334.6842105                             |
| 1.253012048                             | 783.5662651                                          | 0.017814418                                         | 814.2891566                             |
| 1.166163142                             | 1683.83862                                           | 0.001509387                                         | 1756.121853                             |
| 1.068807339                             | 1752.366972                                          | 0.003112221                                         | 1778.885321                             |
| 1.199240987                             | 332.6541746                                          | 0.014755905                                         | 351.1935484                             |
| 1.102878138                             | 506.495101                                           | 0.0042111                                           | 520.1255358                             |
| 1.106523534                             | 1302.005677                                          | 0.001500023                                         | 1337.912469                             |
| 1.465240642                             | 1652.81016                                           | 0.008375664                                         | 1842.058824                             |
| 1.065767285                             | 1012.235245                                          | 0.003219441                                         | 1028.310287                             |
| 1.326086957                             | 613.236413                                           | 0.025076569                                         | 668.173913                              |
| 1.403846154                             | 406.5757212                                          | 0.011114509                                         | 456.6778846                             |
| 1.218309859                             | 1168.795775                                          | 0.004440938                                         | 1230.225352                             |

| wavelet.HLL_gldzm_DistanceZoneVariability | wavelet.HLL_gldzm_ZonePercentage | wavelet.HLL_gldzm_IntensityVariabilityNormalized | wavelet.HLL_gldzm_LowIntensitySmallDistanceEmphasis | wavelet.HLL_gldzm_IntensityVariability |
|-------------------------------------------|----------------------------------|--------------------------------------------------|-----------------------------------------------------|----------------------------------------|
| 411.3018018                               | 0.628895184                      | 0.0308831507                                     | 0.005059671                                         | 13.68818919                            |
| 765.5606596                               | 0.408762638                      | 0.041388677                                      | 0.002886048                                         | 35.13898704                            |
| 217.2                                     | 0.552995392                      | 0.044409722                                      | 0.010063226                                         | 10.65833333                            |
| 1370.365079                               | 0.59772296                       | 0.029092696                                      | 0.001270418                                         | 45.82666667                            |
| 154.1125                                  | 0.445682451                      | 0.04984375                                       | 0.009033665                                         | 7.975                                  |
| 298.1896552                               | 0.541213064                      | 0.03930506                                       | 0.005677487                                         | 13.67816092                            |
| 104.8169014                               | 0.421364985                      | 0.067446935                                      | 0.012468238                                         | 9.577464789                            |
| 461.2596899                               | 0.51497006                       | 0.043446908                                      | 0.008660358                                         | 22.41860465                            |
| 1161.28866                                | 0.606541607                      | 0.03195543                                       | 0.001598545                                         | 40.29579699                            |
| 1350.065926                               | 0.465138799                      | 0.048080864                                      | 0.002192832                                         | 69.28452464                            |
| 326.9602273                               | 0.425634825                      | 0.057157154                                      | 0.011170901                                         | 20.11931818                            |
| 726.6401469                               | 0.551282051                      | 0.035094211                                      | 0.002530695                                         | 28.67197062                            |
| 729.5891277                               | 0.381388621                      | 0.051833213                                      | 0.002076099                                         | 41                                     |
| 575.3253589                               | 0.560822898                      | 0.035156399                                      | 0.004996914                                         | 22.0430622                             |
| 439.6627451                               | 0.559824369                      | 0.040399846                                      | 0.002961956                                         | 20.60392157                            |
| 2114.525482                               | 0.336116309                      | 0.041277644                                      | 0.000813073                                         | 96.38329764                            |
| 281.2750716                               | 0.5                              | 0.039925781                                      | 0.005096274                                         | 13.93409742                            |
| 834.1901408                               | 0.36535163                       | 0.046510282                                      | 0.004052222                                         | 39.62676056                            |
| 326.5604938                               | 0.695876289                      | 0.023465935                                      | 0.003361081                                         | 19.93073704                            |
| 811.7650531                               | 0.302392003                      | 0.055038339                                      | 0.009721492                                         | 46.61747344                            |
| 2112.725054                               | 0.446975498                      | 0.03522837                                       | 0.001421461                                         | 82.25824411                            |
| 702.8108449                               | 0.461046512                      | 0.051438422                                      | 0.008581293                                         | 40.79066835                            |
| 1434.947233                               | 0.569022336                      | 0.031379145                                      | 0.001304998                                         | 48.76319176                            |
| 204.8781362                               | 0.58004158                       | 0.041045208                                      | 0.005612533                                         | 11.45161229                            |
| 462.4682081                               | 0.431063123                      | 0.052966094                                      | 0.006092728                                         | 27.4894027                             |
| 319.0978593                               | 0.471181556                      | 0.047277436                                      | 0.005264939                                         | 15.4587156                             |
| 1218.451036                               | 0.403635314                      | 0.047461145                                      | 0.001969078                                         | 66.39814153                            |
| 623.0939394                               | 0.460572226                      | 0.049885216                                      | 0.003228721                                         | 32.92424242                            |
| 900.317176                                | 0.537677054                      | 0.040987074                                      | 0.005290933                                         | 38.8967334                             |
| 1064.670425                               | 0.453579858                      | 0.034018876                                      | 0.002855315                                         | 39.22376409                            |
| 1358.530569                               | 0.447625039                      | 0.049243702                                      | 0.005174217                                         | 70.07378777                            |
| 1791.71123                                | 0.3153457                        | 0.059352569                                      | 0.004938458                                         | 110.9893048                            |
| 1119.215947                               | 0.592228234                      | 0.027794947                                      | 0.001673258                                         | 33.46511628                            |
| 61.68421053                               | 0.730769231                      | 0.047091413                                      | 0.017378274                                         | 3.578947368                            |
| 185.9589041                               | 0.659638554                      | 0.038176852                                      | 0.006831248                                         | 8.360730594                            |
| 931.3358779                               | 0.518811881                      | 0.037190068                                      | 0.004300911                                         | 38.97519084                            |
| 1213.840349                               | 0.437152778                      | 0.044429906                                      | 0.008005671                                         | 55.93725179                            |
| 1637.316676                               | 0.531007752                      | 0.035669732                                      | 0.002190134                                         | 63.52779337                            |
| 280.82263                                 | 0.391616766                      | 0.057898232                                      | 0.009205738                                         | 18.93272171                            |
| 572.6533333                               | 0.571973308                      | 0.032255556                                      | 0.004205466                                         | 19.35333333                            |
| 576.3862595                               | 0.444369064                      | 0.048199888                                      | 0.005313399                                         | 31.57099237                            |
| 486.5223881                               | 0.562434418                      | 0.031960609                                      | 0.003259118                                         | 17.13059701                            |
| 720.6109726                               | 0.488428745                      | 0.038951872                                      | 0.002812564                                         | 31.2394015                             |
| 437.4749035                               | 0.505365854                      | 0.042515765                                      | 0.005009341                                         | 22.02316602                            |
| 771.6674183                               | 0.472310969                      | 0.046907034                                      | 0.002920407                                         | 41.6065389                             |
| 1251.655015                               | 0.590664273                      | 0.035218863                                      | 0.003537195                                         | 46.34802432                            |
| 2114.83595                                | 0.597280825                      | 0.029002647                                      | 0.001681168                                         | 73.89874411                            |
| 289.5276873                               | 0.526586621                      | 0.04470074                                       | 0.010141206                                         | 13.72312704                            |
| 80.82352941                               | 0.76119403                       | 0.024798155                                      | 0.011647467                                         | 2.529411765                            |
| 216.4307692                               | 0.523138833                      | 0.054970414                                      | 0.009077309                                         | 14.29230769                            |
| 1561.78429                                | 0.483352804                      | 0.036876261                                      | 0.002916787                                         | 61.03021148                            |
| 377.3256997                               | 0.475211608                      | 0.044720264                                      | 0.008513799                                         | 17.57506361                            |
| 1671.426357                               | 0.472651138                      | 0.043178331                                      | 0.003272764                                         | 77.98006645                            |
| 231.1338583                               | 0.429780034                      | 0.051212102                                      | 0.010235165                                         | 13.00787402                            |
| 2312.686797                               | 0.368082171                      | 0.039105426                                      | 0.001011845                                         | 93.89212828                            |
| 488.3456998                               | 0.674630262                      | 0.026034483                                      | 0.003844206                                         | 15.43844857                            |
| 789.0744467                               | 0.453260374                      | 0.03859576                                       | 0.001933665                                         | 38.36418511                            |
| 470.2533333                               | 0.464037123                      | 0.04845                                          | 0.004208809                                         | 29.07                                  |
| 413.1274725                               | 0.558968059                      | 0.028213984                                      | 0.00694565                                          | 12.83736264                            |
| 373.1305483                               | 0.434733258                      | 0.048763029                                      | 0.007438661                                         | 18.67624021                            |
| 1126.338829                               | 0.57243983                       | 0.031295345                                      | 0.00180359                                          | 37.96125309                            |
| 2430.088394                               | 0.474990873                      | 0.046466946                                      | 0.002323852                                         | 120.9069946                            |
| 1208.579454                               | 0.403236246                      | 0.048602398                                      | 0.003914099                                         | 60.55858748                            |
| 899.9373007                               | 0.344562431                      | 0.037348063                                      | 0.002686443                                         | 35.1445271                             |
| 124.9142857                               | 0.64516129                       | 0.043061224                                      | 0.014586617                                         | 6.028571429                            |
| 731.2902056                               | 0.532517708                      | 0.034469952                                      | 0.001549778                                         | 28.50665054                            |
| 179.8471616                               | 0.581218274                      | 0.045899201                                      | 0.005972175                                         | 10.51091703                            |
| 1537.700621                               | 0.503597122                      | 0.03439142                                       | 0.001174048                                         | 55.37018634                            |
| 226.7557252                               | 0.587443946                      | 0.036711147                                      | 0.006899082                                         | 9.618320611                            |
| 926.038961                                | 0.497762307                      | 0.045446062                                      | 0.003236928                                         | 45.49150849                            |
| 1196.846388                               | 0.432565789                      | 0.038521881                                      | 0.001851998                                         | 50.65627376                            |
| 505.6153846                               | 0.483613818                      | 0.042117833                                      | 0.004402798                                         | 22.996337                              |
| 2082.38119                                | 0.425890093                      | 0.034050649                                      | 0.001248574                                         | 74.94547933                            |
| 2569.423846                               | 0.409618821                      | 0.036364821                                      | 0.001689776                                         | 100.039622                             |
| 3595.295943                               | 0.410784314                      | 0.049175057                                      | 0.001632487                                         | 185.4391408                            |
| 608.7601078                               | 0.664874552                      | 0.026336629                                      | 0.002735716                                         | 19.54177898                            |
| 462.4183865                               | 0.477170994                      | 0.047383038                                      | 0.009334043                                         | 25.25515947                            |
| 280.4563107                               | 0.506557377                      | 0.049528178                                      | 0.00927186                                          | 15.30420712                            |
| 658.6489362                               | 0.426303855                      | 0.049661895                                      | 0.004819892                                         | 37.34574468                            |
| 1198.766292                               | 0.46907941                       | 0.046681536                                      | 0.005183738                                         | 62.31985019                            |
| 260.7142857                               | 0.625                            | 0.030949861                                      | 0.005454671                                         | 9.749206349                            |
| 782.3471074                               | 0.721849366                      | 0.02509861                                       | 0.002020174                                         | 24.29545455                            |
| 1518.843395                               | 0.599212034                      | 0.037482551                                      | 0.001585117                                         | 62.70830843                            |
| 58.63157895                               | 0.524137931                      | 0.049515235                                      | 0.023835115                                         | 3.763157895                            |
| 1699.712838                               | 0.52373931                       | 0.03901114                                       | 0.002890879                                         | 69.28378378                            |
| 1679.304412                               | 0.368334551                      | 0.051688806                                      | 0.003072899                                         | 104.2563213                            |
| 429.3965517                               | 0.596401028                      | 0.029466409                                      | 0.004305902                                         | 13.67241379                            |
| 723.3577431                               | 0.536726804                      | 0.041794689                                      | 0.003115264                                         | 34.81512605                            |
| 97.42105263                               | 0.62295082                       | 0.041859034                                      | 0.020089594                                         | 4.77192825                             |
| 70.18072289                               | 0.79047619                       | 0.041660618                                      | 0.016665537                                         | 3.457831325                            |
| 1778.185297                               | 0.499622642                      | 0.033306154                                      | 0.001260981                                         | 66.14602216                            |
| 416.4587156                               | 0.617563739                      | 0.029648178                                      | 0.003003656                                         | 12.9266055                             |
| 461.6489564                               | 0.515655577                      | 0.042080589                                      | 0.010682889                                         | 22.17647059                            |
| 1524.840784                               | 0.399266504                      | 0.043513511                                      | 0.003594967                                         | 71.05756277                            |
| 2256.107349                               | 0.417154668                      | 0.038191748                                      | 0.001344795                                         | 92.50041288                            |
| 137.9946524                               | 0.739130435                      | 0.024393034                                      | 0.006308387                                         | 4.561497326                            |
| 567.5699831                               | 0.487664474                      | 0.041481705                                      | 0.003108172                                         | 24.59865093                            |
| 74.17391304                               | 0.74796748                       | 0.038043478                                      | 0.01747954                                          | 3.5                                    |
| 159.5384615                               | 0.548812665                      | 0.041651257                                      | 0.009009299                                         | 8.663461538                            |
| 368.5117371                               | 0.527881041                      | 0.029050673                                      | 0.003913925                                         | 12.37558685                            |

| wavelet.HLL_gldzm_HighIntensityLargeDistanceEmphasis | wavelet.HLL_gldzm_SmallDistanceEmphasis | wavelet.HLL_glcm_SumVariance | wavelet.HLL_glcm_Homogeneity1 | wavelet.HLL_glcm_Homogeneity2 |
|------------------------------------------------------|-----------------------------------------|------------------------------|-------------------------------|-------------------------------|
| 929.4864865                                          | 0.971283784                             | 2532.665625                  | 0.204667428                   | 0.121888466                   |
| 1125.58775                                           | 0.961130742                             | 3054.916072                  | 0.319828802                   | 0.239802903                   |
| 389.4708333                                          | 0.9625                                  | 905.9079879                  | 0.254495778                   | 0.161016518                   |
| 2463.387302                                          | 0.947619048                             | 6815.998388                  | 0.213319934                   | 0.131699507                   |
| 737.775                                              | 0.9859375                               | 2050.489917                  | 0.296345042                   | 0.207200523                   |
| 741.566092                                           | 0.941810345                             | 1721.814784                  | 0.243182166                   | 0.154219211                   |
| 489.9859155                                          | 0.883802817                             | 1028.117559                  | 0.324364255                   | 0.232676291                   |
| 440.7170543                                          | 0.957848837                             | 1001.43236                   | 0.252222628                   | 0.159682732                   |
| 2002.191118                                          | 0.969072165                             | 5865.402205                  | 0.21578182                    | 0.13029938                    |
| 869.4378904                                          | 0.975537821                             | 2515.96706                   | 0.282243305                   | 0.19030564                    |
| 248.8892045                                          | 0.972301136                             | 614.2982518                  | 0.310202642                   | 0.217873589                   |
| 1302.53978                                           | 0.955936353                             | 3421.986737                  | 0.239986283                   | 0.153673266                   |
| 1458.704172                                          | 0.96965866                              | 4422.796702                  | 0.310538569                   | 0.218747786                   |
| 746.8708134                                          | 0.967703349                             | 1945.079969                  | 0.232812509                   | 0.144680791                   |
| 1569.660784                                          | 0.944117647                             | 4107.113425                  | 0.236543771                   | 0.145999364                   |
| 3198.89379                                           | 0.962740899                             | 9902.455781                  | 0.380247225                   | 0.311144815                   |
| 931.974212                                           | 0.918338109                             | 2052.236718                  | 0.27361025                    | 0.18213439                    |
| 529.0340376                                          | 0.992077465                             | 1414.533182                  | 0.329436794                   | 0.243867626                   |
| 2653.185185                                          | 0.918518519                             | 6183.271192                  | 0.175947266                   | 0.096506689                   |
| 290.1582054                                          | 0.984061393                             | 717.7381602                  | 0.391480312                   | 0.31448407                    |
| 1517.714347                                          | 0.9624197                               | 4303.674295                  | 0.295494826                   | 0.214671827                   |
| 353.4779319                                          | 0.954602774                             | 869.3061804                  | 0.281394855                   | 0.188361647                   |
| 2512.043115                                          | 0.97007722                              | 7782.855559                  | 0.231526846                   | 0.147873069                   |
| 917.8494624                                          | 0.88172043                              | 1978.974946                  | 0.23149523                    | 0.14156363                    |
| 434.2100193                                          | 0.956647399                             | 1008.899271                  | 0.308396788                   | 0.217371909                   |
| 696.853211                                           | 0.990825688                             | 2163.375541                  | 0.294253348                   | 0.203872365                   |
| 1116.534668                                          | 0.94799857                              | 2951.957736                  | 0.301255013                   | 0.212157349                   |
| 838.9893939                                          | 0.978409091                             | 2433.35296                   | 0.301369571                   | 0.209585986                   |
| 459.6248683                                          | 0.98024236                              | 1144.576358                  | 0.252739997                   | 0.163436407                   |
| 981.3755421                                          | 0.970078057                             | 2622.843538                  | 0.303424918                   | 0.225748546                   |
| 395.8650738                                          | 0.982607168                             | 1060.36807                   | 0.293077735                   | 0.20110234                    |
| 351.6368984                                          | 0.983957219                             | 928.102037                   | 0.369975323                   | 0.286890441                   |
| 1828.208472                                          | 0.972591362                             | 5447.391841                  | 0.205769739                   | 0.122157901                   |
| 537.75                                               | 0.921052632                             | 1111.853801                  | 0.208316904                   | 0.11904011                    |
| 875.8675799                                          | 0.938356164                             | 2304.838699                  | 0.220484219                   | 0.131177975                   |
| 689.7681298                                          | 0.955629771                             | 1673.583209                  | 0.251434929                   | 0.162643108                   |
| 398.7410643                                          | 0.98629865                              | 994.5387247                  | 0.296261836                   | 0.207269434                   |
| 1097.910163                                          | 0.96841662                              | 3157.584618                  | 0.250312256                   | 0.166107165                   |
| 341.1100917                                          | 0.94266055                              | 785.594973                   | 0.322547779                   | 0.229810422                   |
| 976.365                                              | 0.9825                                  | 2821.611365                  | 0.231678118                   | 0.147519352                   |
| 501.9465649                                          | 0.951908397                             | 1226.790594                  | 0.293227782                   | 0.20214935                    |
| 1360.695896                                          | 0.963619403                             | 3867.93293                   | 0.228913168                   | 0.14237437                    |
| 1076.188279                                          | 0.95978803                              | 2921.320974                  | 0.262310726                   | 0.172927076                   |
| 731.4247104                                          | 0.936293436                             | 1771.834033                  | 0.263830981                   | 0.172973183                   |
| 622.8568207                                          | 0.947576099                             | 1578.693312                  | 0.274177744                   | 0.182215421                   |
| 774.4848024                                          | 0.981193009                             | 2151.455184                  | 0.229822859                   | 0.142339626                   |
| 1666.959576                                          | 0.929650706                             | 4153.521938                  | 0.21030438                    | 0.126009132                   |
| 434.8469055                                          | 0.978013029                             | 1055.021501                  | 0.25716164                    | 0.165269633                   |
| 1756.901961                                          | 0.911764706                             | 4044.595313                  | 0.13854627                    | 0.067855506                   |
| 398.2961538                                          | 0.930769231                             | 892.7109348                  | 0.274325942                   | 0.179887006                   |
| 860.3057402                                          | 0.978247734                             | 2441.946447                  | 0.271538515                   | 0.187297026                   |
| 379.8193384                                          | 0.984732824                             | 1000.532142                  | 0.276972619                   | 0.184408868                   |
| 661.1445183                                          | 0.970930233                             | 1823.232329                  | 0.273881106                   | 0.184033944                   |
| 325.6929134                                          | 0.964566929                             | 818.1661633                  | 0.296928921                   | 0.203625149                   |
| 2464.601833                                          | 0.985943357                             | 7973.761159                  | 0.343003524                   | 0.26816985                    |
| 1672.878583                                          | 0.926644182                             | 4132.889641                  | 0.179255339                   | 0.098087559                   |
| 1875.344064                                          | 0.912474849                             | 4743.879498                  | 0.273765838                   | 0.183715885                   |
| 728.645                                              | 0.9075                                  | 1645.598538                  | 0.281725877                   | 0.190990475                   |
| 910.2505495                                          | 0.963736264                             | 2421.819269                  | 0.249520475                   | 0.170554012                   |
| 423.9477807                                          | 0.990208877                             | 1158.318442                  | 0.303458141                   | 0.212820451                   |
| 1855.214345                                          | 0.972176422                             | 5489.132739                  | 0.224296913                   | 0.138318707                   |
| 734.1644889                                          | 0.974346656                             | 2148.101506                  | 0.27912792                    | 0.188817436                   |
| 526.8258427                                          | 0.988563403                             | 1478.494018                  | 0.334457746                   | 0.253204627                   |
| 1154.194474                                          | 0.983262487                             | 3557.35094                   | 0.366284029                   | 0.294744883                   |
| 409.4857143                                          | 0.957142857                             | 900.014841                   | 0.237307615                   | 0.146092929                   |
| 1650.604595                                          | 0.953748489                             | 4735.999997                  | 0.250051747                   | 0.166685489                   |
| 979.1703057                                          | 0.908296943                             | 2256.959304                  | 0.232703311                   | 0.140312196                   |
| 2305.865217                                          | 0.982763975                             | 7208.615812                  | 0.262486724                   | 0.17627316                    |
| 755.1412214                                          | 0.945610687                             | 1860.249079                  | 0.21785552                    | 0.128868057                   |
| 708.9010989                                          | 0.970779221                             | 1911.606522                  | 0.269575574                   | 0.17774612                    |
| 1577.887452                                          | 0.964638783                             | 4617.236974                  | 0.299217338                   | 0.213194164                   |
| 810.0201465                                          | 0.971153846                             | 2034.71966                   | 0.272287824                   | 0.182166682                   |
| 2019.253521                                          | 0.979213994                             | 6328.060649                  | 0.313219894                   | 0.23031958                    |
| 1254.382043                                          | 0.974372955                             | 3501.542774                  | 0.32075628                    | 0.24275289                    |
| 926.4226995                                          | 0.982100239                             | 2808.605136                  | 0.315294122                   | 0.230071927                   |
| 1464.539084                                          | 0.925202156                             | 3731.607473                  | 0.184280028                   | 0.101326966                   |
| 425.5178236                                          | 0.946529081                             | 933.6747111                  | 0.268630923                   | 0.176317424                   |
| 366.0355987                                          | 0.963592233                             | 881.198893                   | 0.270531227                   | 0.178944337                   |
| 539.8031915                                          | 0.950132979                             | 1251.6049                    | 0.295328496                   | 0.203189415                   |
| 457.9827715                                          | 0.959550562                             | 1119.17984                   | 0.279018539                   | 0.187459985                   |
| 1498.64127                                           | 0.928571429                             | 3854.538527                  | 0.209942994                   | 0.125488218                   |
| 2253.607438                                          | 0.919421488                             | 5464.252991                  | 0.165615195                   | 0.086194617                   |
| 1404.968918                                          | 0.963687986                             | 3952.784315                  | 0.22593037                    | 0.138568241                   |
| 427.5                                                | 0.901315789                             | 780.1178769                  | 0.259291462                   | 0.168170046                   |
| 761.75                                               | 0.983530405                             | 2145.436784                  | 0.257295822                   | 0.167389365                   |
| 598.5146257                                          | 0.930837878                             | 1371.356601                  | 0.321950597                   | 0.232738214                   |
| 1057.077586                                          | 0.970905172                             | 3000.526915                  | 0.214677959                   | 0.127124328                   |
| 829.8619448                                          | 0.946878752                             | 2149.396737                  | 0.246971811                   | 0.154838409                   |
| 398.5526316                                          | 0.940789474                             | 911.8387165                  | 0.243068946                   | 0.152805826                   |
| 937.1807229                                          | 0.936746988                             | 2545.07568                   | 0.1849089                     | 0.099916993                   |
| 2045.254783                                          | 0.958459215                             | 6028.955338                  | 0.269043787                   | 0.186731034                   |
| 1884.958716                                          | 0.982798165                             | 5859.407604                  | 0.204544182                   | 0.119881053                   |
| 425.3510436                                          | 0.950189753                             | 983.6863138                  | 0.250516063                   | 0.158222621                   |
| 574.647275                                           | 0.974280465                             | 1500.644592                  | 0.326411507                   | 0.244248576                   |
| 1481.539637                                          | 0.973369116                             | 4401.534938                  | 0.304579873                   | 0.222070879                   |
| 2599.053476                                          | 0.88368984                              | 5885.099813                  | 0.156969806                   | 0.081634161                   |
| 1092.610455                                          | 0.983558179                             | 3401.440149                  | 0.258992732                   | 0.169472589                   |
| 887.923913                                           | 0.918478261                             | 2103.666455                  | 0.176142459                   | 0.093512184                   |
| 657.0865385                                          | 0.899038462                             | 1260.329856                  | 0.235833512                   | 0.147260079                   |
| 1475.943662                                          | 0.945422535                             | 3793.060858                  | 0.263331345                   | 0.181534658                   |

| wavelet.HLL_glcml_ClusterShade | wavelet.HLL_glcml_MaximumProbability | wavelet.HLL_glcml_dmn | wavelet.HLL_glcml_SumVariance2 | wavelet.HLL_glcml_Contrast | wavelet.HLL_glcml_DifferenceEntropy |
|--------------------------------|--------------------------------------|-----------------------|--------------------------------|----------------------------|-------------------------------------|
| 328.3285117                    | 0.009749165                          | 0.965850817           | 180.9230755                    | 129.6104647                | 4.472241325                         |
| 77.70701511                    | 0.041515732                          | 0.982513642           | 81.28010581                    | 63.13655076                | 3.920482535                         |
| 147.1556502                    | 0.015555969                          | 0.964953114           | 55.0980983                     | 53.80095892                | 3.897865202                         |
| 129.603704                     | 0.012230913                          | 0.980956763           | 199.5206472                    | 149.3405917                | 4.583229987                         |
| -208.5554995                   | 0.021808975                          | 0.982015923           | 62.20383155                    | 54.02244804                | 3.744117173                         |
| 245.0546394                    | 0.011481862                          | 0.963296787           | 94.67371422                    | 78.04426594                | 4.102964897                         |
| -89.45726692                   | 0.026440793                          | 0.972334412           | 32.08714109                    | 28.33714379                | 3.40304789                          |
| -74.43466656                   | 0.010482161                          | 0.955275652           | 73.47016923                    | 56.60413632                | 3.953795442                         |
| -1022.353693                   | 0.00687703                           | 0.979322127           | 183.9210815                    | 128.2507463                | 4.458162656                         |
| 37.29430575                    | 0.01556322                           | 0.982387689           | 45.70066102                    | 43.48079964                | 3.782440948                         |
| 42.26256822                    | 0.017816503                          | 0.963543883           | 36.02835775                    | 30.18577569                | 3.528547652                         |
| 317.1064267                    | 0.013274457                          | 0.977434516           | 119.2448241                    | 99.94673072                | 4.279317801                         |
| 142.304645                     | 0.015953543                          | 0.988452428           | 50.70076601                    | 37.54765635                | 3.615279882                         |
| 180.1626677                    | 0.008772111                          | 0.967569453           | 146.498303                     | 87.96122425                | 4.19261109                          |
| -370.1884586                   | 0.008763629                          | 0.980041179           | 101.7850419                    | 84.60414918                | 4.132243404                         |
| 71.53460092                    | 0.079388721                          | 0.992190478           | 79.69182266                    | 57.42553885                | 3.752095427                         |
| 642.1895084                    | 0.016649407                          | 0.978588511           | 92.34710131                    | 61.15408978                | 3.859475693                         |
| 263.9165076                    | 0.020013038                          | 0.979332088           | 64.8550633                     | 36.57454832                | 3.62829985                          |
| 3899.981054                    | 0.008247005                          | 0.967488422           | 380.4924135                    | 240.4209053                | 4.791305049                         |
| 21.2448935                     | 0.047329056                          | 0.973105105           | 31.11848356                    | 24.18121661                | 3.335221903                         |
| 298.0746948                    | 0.030502156                          | 0.984272579           | 103.5856148                    | 77.48591337                | 4.079966314                         |
| -14.92513783                   | 0.011831046                          | 0.964222606           | 45.78715574                    | 41.58553233                | 3.744817093                         |
| 36.81469879                    | 0.012599868                          | 0.980937879           | 160.4650863                    | 134.4492844                | 4.427951648                         |
| -298.937177                    | 0.01146808                           | 0.964908494           | 98.98879514                    | 77.02271018                | 4.109803049                         |
| 89.36216824                    | 0.02041431                           | 0.978202805           | 36.14073266                    | 34.57749658                | 3.598672622                         |
| -139.6532205                   | 0.017047226                          | 0.975638011           | 59.80948037                    | 43.2623491                 | 3.740099257                         |
| 83.54006408                    | 0.017068354                          | 0.984069617           | 51.59040021                    | 40.97103415                | 3.78566505                          |
| -38.73920047                   | 0.017918749                          | 0.985832704           | 47.751017                      | 37.88604478                | 3.650048336                         |
| 357.1474901                    | 0.01033593                           | 0.968119403           | 89.32828534                    | 66.29602305                | 4.046666323                         |
| 144.5051217                    | 0.03629762                           | 0.977993483           | 108.1972051                    | 80.93454281                | 4.085143706                         |
| 46.59200328                    | 0.015835797                          | 0.974321783           | 46.42665556                    | 38.63814999                | 3.712521563                         |
| 31.08843531                    | 0.036416859                          | 0.983249172           | 28.9900949                     | 22.19328022                | 3.318755278                         |
| 618.7503109                    | 0.006547806                          | 0.975927603           | 190.0998913                    | 151.4260017                | 4.573357005                         |
| -198.7100672                   | 0.025114007                          | 0.944447795           | 101.4132633                    | 84.34975969                | 3.925281015                         |
| -347.6764246                   | 0.015049791                          | 0.967576657           | 111.8403869                    | 79.33808648                | 4.099117118                         |
| 533.541106                     | 0.008837438                          | 0.975451649           | 124.9381024                    | 77.1223136                 | 4.117027759                         |
| 53.61362491                    | 0.014796495                          | 0.974367481           | 58.53303111                    | 45.86164487                | 3.806570992                         |
| -3.018404515                   | 0.014234295                          | 0.973726854           | 106.3147222                    | 92.20862436                | 4.256283062                         |
| -43.56334456                   | 0.019236923                          | 0.970666362           | 32.37625905                    | 25.71295418                | 3.413270044                         |
| 264.7626483                    | 0.011384392                          | 0.970856811           | 164.293298                     | 112.0153104                | 4.357135073                         |
| 17.46491295                    | 0.017773691                          | 0.978744765           | 42.79064105                    | 40.85551333                | 3.735742717                         |
| -138.2993023                   | 0.009158417                          | 0.970113887           | 163.5995828                    | 111.1045982                | 4.316976864                         |
| 155.3629612                    | 0.01139106                           | 0.979730181           | 93.46093315                    | 73.13952007                | 4.0541073                           |
| -147.2238268                   | 0.010236587                          | 0.971088613           | 91.59526924                    | 57.04283902                | 3.923163441                         |
| -32.73774315                   | 0.009256982                          | 0.972491232           | 58.1954721                     | 49.15983935                | 3.845177688                         |
| -1.249503853                   | 0.00717395                           | 0.966841818           | 123.2446685                    | 99.24915635                | 4.285022896                         |
| 384.0855378                    | 0.007127803                          | 0.977200618           | 190.3352789                    | 138.1237585                | 4.535610744                         |
| 104.5535189                    | 0.014603784                          | 0.962901778           | 65.92971085                    | 58.94946415                | 3.942337148                         |
| 9860.916434                    | 0.017680005                          | 0.944934253           | 640.4070111                    | 329.333531                 | 4.616883144                         |
| -48.00334442                   | 0.015364417                          | 0.959375227           | 45.33718723                    | 38.68426833                | 3.677726145                         |
| 228.5142965                    | 0.017716292                          | 0.977300124           | 99.40318835                    | 82.60872337                | 4.143058577                         |
| 73.47329739                    | 0.013171252                          | 0.966142151           | 73.61661544                    | 44.30054408                | 3.773849857                         |
| -120.921151                    | 0.012345395                          | 0.976998497           | 72.01731987                    | 53.26147808                | 3.926351795                         |
| 67.09467413                    | 0.0182278                            | 0.966260591           | 53.07063463                    | 34.05693459                | 3.61035799                          |
| 101.1318625                    | 0.047282159                          | 0.991657334           | 100.4759944                    | 66.29556423                | 3.887035679                         |
| -293.6617442                   | 0.006599046                          | 0.969120583           | 279.9847625                    | 191.916785                 | 4.707394748                         |
| 160.113948                     | 0.013030242                          | 0.98645271            | 88.99122109                    | 69.09005006                | 3.988285368                         |
| -145.1634095                   | 0.013874202                          | 0.973320926           | 55.27496626                    | 47.58192231                | 3.819738025                         |
| 63.02337514                    | 0.022005736                          | 0.960189085           | 152.7129918                    | 118.3495633                | 4.353867383                         |
| 54.34664074                    | 0.022711056                          | 0.969752132           | 46.09281634                    | 39.98955301                | 3.673117556                         |
| 1340.001592                    | 0.007720775                          | 0.979915496           | 185.8382487                    | 115.0086228                | 4.387195491                         |
| 14.32929055                    | 0.012941665                          | 0.980481884           | 52.96353009                    | 51.04263255                | 3.884565622                         |
| 155.6194109                    | 0.036214978                          | 0.976708224           | 55.38576859                    | 41.62372863                | 3.70343521                          |
| 318.8521361                    | 0.054943794                          | 0.98395563            | 88.56987973                    | 60.77977661                | 3.762742808                         |
| 410.9566553                    | 0.015066606                          | 0.949219123           | 119.2575248                    | 70.60572541                | 3.973736158                         |
| -259.0573851                   | 0.013569838                          | 0.97837458            | 128.0613258                    | 105.0154143                | 4.299503346                         |
| -75.45308646                   | 0.014162411                          | 0.971946851           | 71.87039771                    | 68.77812907                | 4.014184248                         |
| 453.972321                     | 0.015471649                          | 0.984437489           | 133.0842237                    | 85.48251575                | 4.172391884                         |
| -168.2855827                   | 0.010647184                          | 0.953058963           | 132.3597329                    | 99.47689294                | 4.217239936                         |
| -32.35778586                   | 0.011087151                          | 0.976640976           | 62.18790699                    | 51.77860138                | 3.901058196                         |
| 97.00221333                    | 0.021634417                          | 0.987383847           | 88.2354327                     | 59.70454536                | 3.906307447                         |
| -2.948472999                   | 0.01287504                           | 0.97688606            | 92.72329838                    | 60.03250691                | 3.92914016                          |
| 464.9365061                    | 0.033314824                          | 0.987099675           | 110.9112732                    | 86.61213268                | 4.026972282                         |
| 528.6938766                    | 0.034540425                          | 0.984881535           | 99.22348537                    | 75.91491271                | 3.994004922                         |
| 126.8279843                    | 0.025349084                          | 0.987336384           | 47.34137648                    | 43.8136928                 | 3.771742645                         |
| 1696.809042                    | 0.005658551                          | 0.968788341           | 288.3718743                    | 162.3183981                | 4.621569886                         |
| 76.1077896                     | 0.01528048                           | 0.969265245           | 53.75415982                    | 49.72445493                | 3.863793516                         |
| 18.243335                      | 0.015287115                          | 0.964533227           | 58.9671496                     | 49.45454478                | 3.828741895                         |
| 73.40899743                    | 0.013047001                          | 0.976770389           | 46.21913064                    | 38.92685439                | 3.697710544                         |
| 100.1160221                    | 0.010394895                          | 0.976107893           | 58.80412263                    | 46.25019206                | 3.827567442                         |
| -257.1604993                   | 0.009762711                          | 0.966699124           | 186.8690317                    | 152.9092365                | 4.474180746                         |
| 1024.291077                    | 0.005423008                          | 0.968889024           | 286.2933795                    | 237.7174514                | 4.867143577                         |
| 140.5803731                    | 0.00828593                           | 0.975012966           | 103.5038233                    | 95.61739091                | 4.317695557                         |
| -467.732895                    | 0.026928861                          | 0.956258347           | 97.4373627                     | 55.14050033                | 3.747638574                         |
| 771.73272                      | 0.011471702                          | 0.983808055           | 107.1543255                    | 66.55621878                | 4.054938807                         |
| 88.31522389                    | 0.017241415                          | 0.986017878           | 43.09462253                    | 33.14834373                | 3.585947263                         |
| 1699.3624                      | 0.010636273                          | 0.981043809           | 190.5662031                    | 113.021788                 | 4.342219331                         |
| -128.8677755                   | 0.008133288                          | 0.971028436           | 104.7643655                    | 58.93244386                | 3.997068479                         |
| -207.3001213                   | 0.022381091                          | 0.947928506           | 75.55079646                    | 67.53018403                | 3.879384891                         |
| -903.1090438                   | 0.024085526                          | 0.939845985           | 145.6293607                    | 134.3412182                | 4.137292311                         |
| -20.24560196                   | 0.017973058                          | 0.980503243           | 136.2043307                    | 104.9548698                | 4.255572721                         |
| 1284.407352                    | 0.009207417                          | 0.977389794           | 191.9749714                    | 136.196398                 | 4.462314019                         |
| 67.28969894                    | 0.01217731                           | 0.964206187           | 64.97821532                    | 62.11805748                | 4.007986571                         |
| 207.5160096                    | 0.025731262                          | 0.978151223           | 64.32331518                    | 47.20788679                | 3.771179347                         |
| 145.3342027                    | 0.024630669                          | 0.986767301           | 85.93645571                    | 66.97752364                | 3.966330447                         |
| 1832.142295                    | 0.010509763                          | 0.952192917           | 418.555693                     | 292.74524                  | 4.80680147                          |
| -87.75561972                   | 0.012828951                          | 0.980236959           | 81.06411579                    | 75.16000822                | 4.062132051                         |
| -1299.325447                   | 0.018488921                          | 0.92593885            | 216.2761446                    | 163.8998497                | 4.314699888                         |
| 269.8917942                    | 0.012868278                          | 0.961162296           | 108.131295                     | 73.856095                  | 4.05672382                          |
| 692.7292539                    | 0.016855595                          | 0.978619222           | 179.3132891                    | 120.9653061                | 4.283012517                         |







| wavelet.HLL_firstorder_Uniformity | wavelet.HLL_firstorder_MeanAbsoluteDeviation | wavelet.HLL_firstorder_Energy | wavelet.HLL_firstorder_RobustMeanAbsoluteDeviation | wavelet.HLL_firstorder_Median |
|-----------------------------------|----------------------------------------------|-------------------------------|----------------------------------------------------|-------------------------------|
| 0.037364877                       | 161.9544329                                  | 32169357.85                   | 106.1350014                                        | -17.68684786                  |
| 0.07082569                        | 96.72781274                                  | 40907417.25                   | 55.41020681                                        | -2.049255039                  |
| 0.055522521                       | 105.588295                                   | 7855681.507                   | 72.09543478                                        | -10.91610192                  |
| 0.038597194                       | 164.8990454                                  | 135292113.6                   | 101.000283                                         | 7.933170467                   |
| 0.066425617                       | 95.61389678                                  | 6574223.354                   | 59.2630045                                         | -8.92275392                   |
| 0.046750627                       | 125.4329357                                  | 16387625.05                   | 86.34444163                                        | -25.34555851                  |
| 0.089628332                       | 68.03739152                                  | 2810083.778                   | 44.57824015                                        | 16.24307817                   |
| 0.049936056                       | 113.1984761                                  | 20054619.66                   | 80.01641725                                        | -12.40371713                  |
| 0.038045773                       | 157.2164602                                  | 92829406.54                   | 100.1459522                                        | 17.52561003                   |
| 0.064600498                       | 89.5125387                                   | 42706132.95                   | 59.14483545                                        | -4.370633496                  |
| 0.072912539                       | 78.32396579                                  | 8232939.128                   | 53.8090869                                         | -4.533465142                  |
| 0.047267161                       | 131.2406454                                  | 47873955.44                   | 80.60442556                                        | -13.0332892                   |
| 0.06783811                        | 86.44537285                                  | 27373813.5                    | 57.48883874                                        | 0.304955291                   |
| 0.040237646                       | 144.887551                                   | 38350990.75                   | 97.85915886                                        | -1.971824033                  |
| 0.049220347                       | 120.4599265                                  | 23543162.46                   | 77.88225014                                        | 4.620546969                   |
| 0.112809651                       | 82.30646706                                  | 125872657.2                   | 38.26331052                                        | -1.192274147                  |
| 0.055213011                       | 112.6788199                                  | 17060729.38                   | 68.22529074                                        | -0.12731388                   |
| 0.066874406                       | 88.87997474                                  | 33336315.84                   | 56.95407187                                        | -14.59448748                  |
| 0.027337892                       | 233.8997031                                  | 58060804.11                   | 146.3023994                                        | 9.701250184                   |
| 0.100153577                       | 62.69360196                                  | 21791943.97                   | 37.24644204                                        | -3.013794604                  |
| 0.063774451                       | 111.4458694                                  | 140299776.5                   | 62.2114265                                         | -9.564685681                  |
| 0.064144132                       | 88.64209401                                  | 22417201.72                   | 59.80986265                                        | 2.220804614                   |
| 0.041716002                       | 149.4620272                                  | 114895440.4                   | 93.5997227                                         | -10.85514343                  |
| 0.049424925                       | 120.6957748                                  | 11875994.7                    | 79.6496776                                         | 6.155117633                   |
| 0.072984846                       | 80.56247644                                  | 14089770.2                    | 52.4011818                                         | -20.47614216                  |
| 0.06441379                        | 94.01305096                                  | 11197016.12                   | 59.35228719                                        | -2.119982589                  |
| 0.066680563                       | 87.92749013                                  | 47615790.29                   | 56.77245073                                        | -0.907348236                  |
| 0.064957251                       | 90.44609686                                  | 20545324.6                    | 59.71051068                                        | -15.34669821                  |
| 0.047508286                       | 122.6277568                                  | 42954345.27                   | 86.5810248                                         | -41.97382496                  |
| 0.061173389                       | 115.2213882                                  | 68788559.31                   | 66.21112203                                        | -2.604759974                  |
| 0.065248004                       | 88.00253131                                  | 41513421.63                   | 58.71982438                                        | -5.731685593                  |
| 0.096252343                       | 62.9419407                                   | 44584961.17                   | 38.83060124                                        | -7.204725186                  |
| 0.034777136                       | 171.1418323                                  | 105597305.7                   | 110.2855958                                        | -6.722583407                  |
| 0.049371302                       | 130.1873061                                  | 2748974.13                    | 88.94723154                                        | 16.71165077                   |
| 0.044055741                       | 139.388999                                   | 10289048.9                    | 96.15290328                                        | 21.2326789                    |
| 0.045394569                       | 128.8940873                                  | 57625916.38                   | 84.78517794                                        | -5.279931883                  |
| 0.063241705                       | 95.35232201                                  | 50702105.22                   | 60.5456034                                         | -29.59704844                  |
| 0.049168678                       | 124.0610983                                  | 95533243.29                   | 76.86646061                                        | -8.069026435                  |
| 0.078544229                       | 73.23584999                                  | 7464121.79                    | 50.04385802                                        | 14.94928896                   |
| 0.042636275                       | 145.7423072                                  | 14469084.74                   | 91.34801855                                        | -15.8655748                   |
| 0.069422224                       | 85.28132081                                  | 19622832.93                   | 54.97947126                                        | -17.00699923                  |
| 0.039679193                       | 150.3536594                                  | 37289404.21                   | 97.57322038                                        | 2.447700266                   |
| 0.052914437                       | 114.740264                                   | 40377022.74                   | 71.46605921                                        | -2.582820406                  |
| 0.052990363                       | 110.6342405                                  | 21139130.81                   | 72.9077773                                         | 6.744403651                   |
| 0.05913095                        | 97.16231551                                  | 28785010.76                   | 66.8728264                                         | -2.506159383                  |
| 0.040706014                       | 140.8313544                                  | 72486229.84                   | 96.37622267                                        | 13.91088123                   |
| 0.036092687                       | 164.3308473                                  | 206552758                     | 104.7057783                                        | -7.335052358                  |
| 0.055880008                       | 106.5071145                                  | 11470530.83                   | 69.53805788                                        | -10.10169702                  |
| 0.027177545                       | 305.6882121                                  | 21283600.89                   | 203.5196728                                        | 15.64602369                   |
| 0.066349809                       | 87.48627887                                  | 6128254.76                    | 60.33011385                                        | -2.56169562                   |
| 0.055473595                       | 114.1797909                                  | 88549859.31                   | 67.68424408                                        | -14.61786822                  |
| 0.055466284                       | 103.6058752                                  | 14821915.7                    | 69.63080253                                        | -13.78518231                  |
| 0.057068127                       | 101.5822588                                  | 68519696.27                   | 66.36976875                                        | -0.737736952                  |
| 0.066367767                       | 90.72259257                                  | 7727269.228                   | 63.14438847                                        | -15.50979797                  |
| 0.089305172                       | 93.11579305                                  | 146402974.3                   | 45.66087956                                        | -2.767221841                  |
| 0.029176552                       | 202.4643178                                  | 161185683.75                  | 134.6168817                                        | -18.21514586                  |
| 0.055309883                       | 112.6158389                                  | 57377761.4                    | 67.46452027                                        | 4.761575171                   |
| 0.06578764                        | 90.14403378                                  | 18482248.97                   | 57.90737515                                        | 9.83610502                    |
| 0.045237218                       | 150.0006224                                  | 35177590.55                   | 89.67816788                                        | -13.57142688                  |
| 0.066768364                       | 88.47421196                                  | 12292980.56                   | 57.03748241                                        | -8.703129792                  |
| 0.03939881                        | 154.7909544                                  | 92538346.96                   | 97.22040252                                        | -19.03185202                  |
| 0.063008381                       | 92.80751748                                  | 84147626.17                   | 59.87682957                                        | -4.61928754                   |
| 0.079828029                       | 82.51527794                                  | 40644887.15                   | 49.92523937                                        | 2.753113154                   |
| 0.091496108                       | 90.88131881                                  | 57825862.18                   | 42.81294914                                        | 1.062090934                   |
| 0.047972987                       | 129.2199692                                  | 5986430.566                   | 86.0492587                                         | -9.60296137                   |
| 0.051410788                       | 126.7464637                                  | 50174526.8                    | 74.3152765                                         | 4.119946376                   |
| 0.052912984                       | 112.0956588                                  | 8306753.262                   | 75.74664773                                        | -11.29935729                  |
| 0.047843277                       | 129.7532738                                  | 100985008.5                   | 79.7880681                                         | -4.324296006                  |
| 0.041484848                       | 143.8556953                                  | 14809045.37                   | 98.90112778                                        | -11.36162029                  |
| 0.060249681                       | 97.03512404                                  | 33311987                      | 62.96586354                                        | -12.30224753                  |
| 0.064855869                       | 103.4474026                                  | 71210205.24                   | 58.12000616                                        | -9.380214345                  |
| 0.053844965                       | 110.8995338                                  | 25108072.15                   | 71.76778901                                        | -15.36822068                  |
| 0.072124975                       | 108.9638639                                  | 156551155.9                   | 54.06428087                                        | -7.980227853                  |
| 0.073676252                       | 101.6790645                                  | 160366158.2                   | 53.70652767                                        | -4.349972102                  |
| 0.077651402                       | 80.23764599                                  | 116340223.6                   | 47.97765743                                        | -0.124649657                  |
| 0.028962886                       | 201.7955825                                  | 74273972.93                   | 136.8628274                                        | -0.837028678                  |
| 0.060464587                       | 96.29240992                                  | 17605117.5                    | 63.65096472                                        | -6.354859944                  |
| 0.061762967                       | 96.87157803                                  | 9742586.59                    | 64.94994116                                        | -27.06885468                  |
| 0.066609335                       | 86.91656704                                  | 22913053.76                   | 58.26212465                                        | -17.08217028                  |
| 0.058646501                       | 97.14632382                                  | 45189800.76                   | 65.42556027                                        | -13.14789548                  |
| 0.037005543                       | 169.8537596                                  | 26298699.16                   | 107.8373306                                        | -25.67154414                  |
| 0.02778598                        | 214.0640229                                  | 106054945.1                   | 140.5539097                                        | -8.61454337                   |
| 0.045602561                       | 127.3685187                                  | 77989430.59                   | 83.90143593                                        | -11.9075227                   |
| 0.064447087                       | 111.2324146                                  | 3086577.458                   | 70.04356417                                        | 27.41680904                   |
| 0.04956978                        | 122.4248048                                  | 91764355.44                   | 78.50754255                                        | 1.858078744                   |
| 0.076431334                       | 77.14936134                                  | 58573425.27                   | 49.53789216                                        | -1.45418799                   |
| 0.036300315                       | 169.1646658                                  | 38622970.13                   | 111.1751844                                        | -15.15355991                  |
| 0.046063775                       | 122.7721462                                  | 37054543.01                   | 84.96107253                                        | -2.057746914                  |
| 0.049598376                       | 122.94531                                    | 5323181.607                   | 81.40480959                                        | -56.51821808                  |
| 0.044172336                       | 153.4757092                                  | 4119125.418                   | 102.4956888                                        | 10.92220976                   |
| 0.050601353                       | 129.0976216                                  | 135750359.9                   | 75.22582125                                        | 8.802578885                   |
| 0.035908321                       | 169.6209245                                  | 36206107.79                   | 109.7489676                                        | -32.59069664                  |
| 0.053032885                       | 108.4871675                                  | 19804031.37                   | 73.21188978                                        | 4.918614142                   |
| 0.067889838                       | 91.37591893                                  | 64199987.54                   | 56.30569031                                        | -7.561589089                  |
| 0.064479011                       | 102.1568645                                  | 126442043                     | 58.50403859                                        | -7.499671671                  |
| 0.026261932                       | 252.9449494                                  | 26405496.23                   | 169.5535681                                        | -6.139501958                  |
| 0.056912494                       | 107.5126345                                  | 27457345.41                   | 66.37484388                                        | -1.653150609                  |
| 0.04236896                        | 169.7262362                                  | 5862269.192                   | 110.1366615                                        | 20.27243889                   |
| 0.049045885                       | 125.4847                                     | 9973504.795                   | 84.75989749                                        | 20.44318224                   |
| 0.0467732                         | 149.1887857                                  | 38574646.86                   | 84.63626875                                        | -29.86859442                  |







| wavelet.HLL_glrIm_ShortRunLowGrayLevelEmphasis | wavelet.HLL_glrIm_GrayLevelVariance | wavelet.HLL_glrIm_LowGrayLevelRunEmphasis | wavelet.HLL_glrIm_GrayLevelNonUniformityNormalized | wavelet.HLL_glrIm_RunVariance |
|------------------------------------------------|-------------------------------------|-------------------------------------------|----------------------------------------------------|-------------------------------|
| 0.003937559                                    | 73.3978061                          | 0.003982723                               | 0.036517404                                        | 0.043423076                   |
| 0.001960992                                    | 33.7488215                          | 0.002038317                               | 0.064436655                                        | 0.127167602                   |
| 0.007713287                                    | 29.72085968                         | 0.007858319                               | 0.054387104                                        | 0.052483721                   |
| 0.001014144                                    | 83.49584151                         | 0.001032963                               | 0.037214105                                        | 0.054389192                   |
| 0.005223589                                    | 30.59396365                         | 0.005314246                               | 0.06518143                                         | 0.071561386                   |
| 0.004207305                                    | 40.88596634                         | 0.004286308                               | 0.046010024                                        | 0.05251511                    |
| 0.009886186                                    | 13.85783205                         | 0.010045016                               | 0.087114288                                        | 0.076440014                   |
| 0.006567839                                    | 32.21122017                         | 0.006790977                               | 0.049469664                                        | 0.050356894                   |
| 0.00124885                                     | 72.81045294                         | 0.00126819                                | 0.037523951                                        | 0.042861459                   |
| 0.001762557                                    | 22.80580056                         | 0.001822139                               | 0.063023372                                        | 0.065771355                   |
| 0.00807368                                     | 16.38280556                         | 0.008336886                               | 0.071449002                                        | 0.069450457                   |
| 0.001957123                                    | 53.36702614                         | 0.001997141                               | 0.045922131                                        | 0.054499282                   |
| 0.00130527                                     | 21.90201385                         | 0.001348041                               | 0.066593697                                        | 0.080658503                   |
| 0.003875907                                    | 55.82472901                         | 0.003954858                               | 0.039736487                                        | 0.048292736                   |
| 0.002105645                                    | 42.47298594                         | 0.002135419                               | 0.048507742                                        | 0.047947452                   |
| 0.00051813                                     | 32.33065348                         | 0.000551012                               | 0.095366088                                        | 0.211116265                   |
| 0.003579366                                    | 40.81586955                         | 0.003652669                               | 0.053739482                                        | 0.066241173                   |
| 0.003057617                                    | 23.84952262                         | 0.003211299                               | 0.064511607                                        | 0.099137417                   |
| 0.004233658                                    | 159.9401694                         | 0.004357502                               | 0.026904018                                        | 0.030950941                   |
| 0.006149986                                    | 13.45680569                         | 0.006510886                               | 0.092382197                                        | 0.165867276                   |
| 0.001105769                                    | 45.5277548                          | 0.001152302                               | 0.058343965                                        | 0.109156182                   |
| 0.006719741                                    | 21.63251398                         | 0.006907721                               | 0.063118705                                        | 0.063244074                   |
| 0.000967248                                    | 69.38935196                         | 0.000983987                               | 0.040316207                                        | 0.057463926                   |
| 0.004648428                                    | 40.41378327                         | 0.004705695                               | 0.048838152                                        | 0.039690309                   |
| 0.00461308                                     | 19.19486819                         | 0.004779227                               | 0.071142614                                        | 0.074114715                   |
| 0.003410478                                    | 26.67397275                         | 0.003486647                               | 0.062667233                                        | 0.070074295                   |
| 0.001512596                                    | 22.93638313                         | 0.001575246                               | 0.064544535                                        | 0.083823716                   |
| 0.002291119                                    | 23.27006159                         | 0.002356455                               | 0.063747297                                        | 0.066126604                   |
| 0.005053903                                    | 38.07372559                         | 0.005218876                               | 0.0469431                                          | 0.054836154                   |
| 0.002097311                                    | 46.31030491                         | 0.002181555                               | 0.055143691                                        | 0.124957384                   |
| 0.0041628                                      | 21.62472217                         | 0.004316437                               | 0.0637623                                          | 0.070841182                   |
| 0.003921768                                    | 12.74782624                         | 0.004174804                               | 0.091046463                                        | 0.129864662                   |
| 0.001319745                                    | 84.88733431                         | 0.001341534                               | 0.03412515                                         | 0.043678203                   |
| 0.014646977                                    | 42.76447442                         | 0.014719624                               | 0.049176475                                        | 0.022899491                   |
| 0.005218656                                    | 50.87886198                         | 0.005255769                               | 0.043461168                                        | 0.034294439                   |
| 0.003733474                                    | 46.83064457                         | 0.003833166                               | 0.044599004                                        | 0.06046458                    |
| 0.005749147                                    | 27.11132188                         | 0.00593538                                | 0.061384804                                        | 0.077278035                   |
| 0.001753746                                    | 47.18369497                         | 0.001800076                               | 0.047279349                                        | 0.06651167                    |
| 0.006421349                                    | 14.56837996                         | 0.006627077                               | 0.076893834                                        | 0.078224712                   |
| 0.003079831                                    | 64.7347759                          | 0.003128446                               | 0.041288661                                        | 0.052482794                   |
| 0.003951036                                    | 21.62075533                         | 0.004075448                               | 0.067076735                                        | 0.071556996                   |
| 0.002328231                                    | 63.82329737                         | 0.002359467                               | 0.039067906                                        | 0.047287574                   |
| 0.002051231                                    | 40.60722859                         | 0.002100899                               | 0.05166748                                         | 0.059563136                   |
| 0.003655903                                    | 34.13985983                         | 0.003734636                               | 0.052159124                                        | 0.056476586                   |
| 0.002989461                                    | 25.24604705                         | 0.003076741                               | 0.058274134                                        | 0.05878485                    |
| 0.002981872                                    | 52.32405839                         | 0.003043749                               | 0.040252305                                        | 0.044395505                   |
| 0.001478884                                    | 79.28035339                         | 0.001509643                               | 0.035415795                                        | 0.046180702                   |
| 0.007224382                                    | 32.32210404                         | 0.007353987                               | 0.055019386                                        | 0.049435853                   |
| 0.009810205                                    | 240.9450222                         | 0.00985037                                | 0.026992825                                        | 0.021929746                   |
| 0.006802297                                    | 20.17616535                         | 0.00693669                                | 0.065230424                                        | 0.052782235                   |
| 0.002245157                                    | 42.90923347                         | 0.002314617                               | 0.053133545                                        | 0.077064877                   |
| 0.006080601                                    | 29.09415428                         | 0.006233734                               | 0.054528533                                        | 0.059320836                   |
| 0.002629594                                    | 29.67272308                         | 0.002715345                               | 0.055656221                                        | 0.065641675                   |
| 0.007181803                                    | 21.51529149                         | 0.007389911                               | 0.064971268                                        | 0.070701265                   |
| 0.000662429                                    | 38.66794907                         | 0.000693788                               | 0.080525396                                        | 0.142606386                   |
| 0.003205388                                    | 112.6406873                         | 0.003240032                               | 0.028923704                                        | 0.031673736                   |
| 0.001335896                                    | 43.4796079                          | 0.0013712                                 | 0.053820556                                        | 0.070616171                   |
| 0.003212189                                    | 23.77689869                         | 0.003312347                               | 0.064218569                                        | 0.065176889                   |
| 0.004774946                                    | 72.04753159                         | 0.0048379                                 | 0.042131423                                        | 0.070794566                   |
| 0.005028277                                    | 23.02952755                         | 0.005179564                               | 0.064838683                                        | 0.080170765                   |
| 0.001355773                                    | 71.44930858                         | 0.001378142                               | 0.038632516                                        | 0.049270053                   |
| 0.001990602                                    | 25.4378529                          | 0.002062426                               | 0.061484631                                        | 0.065592275                   |
| 0.002970767                                    | 21.88168722                         | 0.003115022                               | 0.074615082                                        | 0.107717763                   |
| 0.001606303                                    | 37.44879558                         | 0.001688575                               | 0.079934853                                        | 0.180380694                   |
| 0.0162534                                      | 44.44705851                         | 0.016701337                               | 0.047380611                                        | 0.036247494                   |
| 0.001720771                                    | 53.73271976                         | 0.001749479                               | 0.049556454                                        | 0.061962878                   |
| 0.004346839                                    | 34.21178037                         | 0.00439446                                | 0.052329824                                        | 0.040047822                   |
| 0.000851172                                    | 52.10894543                         | 0.00087058                                | 0.04624312                                         | 0.066466548                   |
| 0.005206968                                    | 53.79711622                         | 0.00526815                                | 0.041084341                                        | 0.041488339                   |
| 0.002589838                                    | 27.02529533                         | 0.002661511                               | 0.05918518                                         | 0.054433865                   |
| 0.001270737                                    | 39.53739909                         | 0.001311952                               | 0.061460466                                        | 0.08899438                    |
| 0.003953044                                    | 36.24101261                         | 0.004087629                               | 0.052703836                                        | 0.064177896                   |
| 0.000869253                                    | 51.84058866                         | 0.000903442                               | 0.065546806                                        | 0.117594153                   |
| 0.001292125                                    | 41.00873431                         | 0.00135809                                | 0.067125025                                        | 0.1231379                     |
| 0.001379473                                    | 21.38040353                         | 0.001448778                               | 0.073625938                                        | 0.09521848                    |
| 0.002400112                                    | 107.6606615                         | 0.002428172                               | 0.028749792                                        | 0.033464652                   |
| 0.006874695                                    | 25.88367681                         | 0.007045772                               | 0.059227186                                        | 0.06077566                    |
| 0.010264518                                    | 25.77960612                         | 0.010631043                               | 0.060594612                                        | 0.055451981                   |
| 0.003669962                                    | 21.2390383                          | 0.003798135                               | 0.065315281                                        | 0.071908673                   |
| 0.004524475                                    | 25.93841583                         | 0.004660913                               | 0.057719265                                        | 0.062993795                   |
| 0.003950841                                    | 83.35775312                         | 0.003979134                               | 0.036368423                                        | 0.041967973                   |
| 0.001750644                                    | 127.8045921                         | 0.001764546                               | 0.027585889                                        | 0.025035819                   |
| 0.001348267                                    | 45.48326207                         | 0.001374763                               | 0.044914795                                        | 0.042180438                   |
| 0.024504261                                    | 35.18521386                         | 0.024877015                               | 0.062835134                                        | 0.057405232                   |
| 0.002375524                                    | 43.80416642                         | 0.00244396                                | 0.048516959                                        | 0.057169158                   |
| 0.002872336                                    | 17.92479607                         | 0.003011053                               | 0.07412866                                         | 0.088081406                   |
| 0.003182283                                    | 81.39023664                         | 0.003219064                               | 0.035580411                                        | 0.042588286                   |
| 0.002582695                                    | 38.82126836                         | 0.002646498                               | 0.045724702                                        | 0.050091025                   |
| 0.014799019                                    | 40.71743784                         | 0.014923228                               | 0.048619087                                        | 0.040419432                   |
| 0.013869255                                    | 63.24679424                         | 0.013889941                               | 0.043920685                                        | 0.01829961                    |
| 0.000960825                                    | 56.84780748                         | 0.000988447                               | 0.047963901                                        | 0.083107514                   |
| 0.002163338                                    | 82.47054487                         | 0.002182011                               | 0.035331228                                        | 0.039772653                   |
| 0.007799974                                    | 31.99250846                         | 0.007932302                               | 0.052142414                                        | 0.054062252                   |
| 0.002864992                                    | 26.5944207                          | 0.00301042                                | 0.064133253                                        | 0.11418958                    |
| 0.001035656                                    | 36.93287144                         | 0.0010819                                 | 0.060547194                                        | 0.104106077                   |
| 0.005331157                                    | 168.5255418                         | 0.005349393                               | 0.026139003                                        | 0.024621504                   |
| 0.002079931                                    | 37.57567305                         | 0.002120448                               | 0.055664502                                        | 0.060071507                   |
| 0.01489321                                     | 76.74304213                         | 0.014920169                               | 0.042017188                                        | 0.019985941                   |
| 0.006821035                                    | 42.32451644                         | 0.006938699                               | 0.048422543                                        | 0.047800104                   |
| 0.002672252                                    | 77.85264742                         | 0.002716426                               | 0.044378468                                        | 0.074433643                   |

| wavelet.HLL_glrIm_GrayLevelNonUniformity | wavelet.HLL_glrIm_LongRunEmphasis | wavelet.HLL_glrIm_ShortRunHighGrayLevelEmphasis | wavelet.HLL_glrIm_RunLengthNonUniformity | wavelet.HLL_glrIm_ShortRunEmphasis |
|------------------------------------------|-----------------------------------|-------------------------------------------------|------------------------------------------|------------------------------------|
| 24.85319393                              | 1.119743023                       | 806.8949913                                     | 635.7028329                              | 0.973940581                        |
| 122.0125654                              | 1.333465868                       | 862.1968289                                     | 1605.70786                               | 0.936310115                        |
| 22.51335223                              | 1.152447673                       | 311.5004449                                     | 377.9700403                              | 0.965326114                        |
| 93.63635179                              | 1.151917741                       | 1915.670698                                     | 2307.780943                              | 0.966872695                        |
| 21.91130219                              | 1.213568021                       | 629.4077399                                     | 296.1002486                              | 0.951227753                        |
| 28.22189275                              | 1.152161048                       | 545.3431429                                     | 560.2995941                              | 0.965428451                        |
| 27.43662338                              | 1.222768446                       | 315.7930317                                     | 276.904363                               | 0.950605374                        |
| 47.265819                                | 1.15048653                        | 341.493765                                      | 870.4200283                              | 0.964621262                        |
| 74.98589771                              | 1.125850115                       | 1682.91688                                      | 185.1150115                              | 0.970836513                        |
| 184.2555003                              | 1.189178755                       | 741.3725347                                     | 2617.83889                               | 0.957892889                        |
| 55.47381688                              | 1.204683441                       | 211.7311945                                     | 687.0796477                              | 0.953420533                        |
| 64.81417168                              | 1.15750823                        | 1012.599679                                     | 1285.559601                              | 0.964393339                        |
| 128.5979274                              | 1.235014625                       | 1223.889419                                     | 1684.473313                              | 0.947785661                        |
| 42.49351016                              | 1.142371423                       | 608.0674532                                     | 981.5960197                              | 0.967121215                        |
| 42.28020685                              | 1.141405039                       | 1183.606482                                     | 800.1553827                              | 0.967256214                        |
| 582.3917374                              | 1.5179671                         | 2495.110457                                     | 4882.406862                              | 0.913199721                        |
| 35.43020188                              | 1.188093749                       | 629.653495                                      | 592.354961                               | 0.95887705                         |
| 138.3562244                              | 1.282509709                       | 440.5429766                                     | 1831.689643                              | 0.939658142                        |
| 15.20326721                              | 1.092366986                       | 1808.033423                                     | 533.4436685                              | 0.977974614                        |
| 230.7711111                              | 1.429216933                       | 229.3386626                                     | 2041.526234                              | 0.921477536                        |
| 281.4661658                              | 1.284955298                       | 1209.153329                                     | 4183.922141                              | 0.945035679                        |
| 102.6048951                              | 1.183440116                       | 285.1298101                                     | 1459.225301                              | 0.958793401                        |
| 104.9206244                              | 1.160304128                       | 2145.946134                                     | 2378.352123                              | 0.965309702                        |
| 22.60510589                              | 1.120075303                       | 619.1448755                                     | 428.750211                               | 0.97101621                         |
| 80.2603262                               | 1.21418063                        | 326.1879866                                     | 996.6017044                              | 0.952575517                        |
| 40.86187014                              | 1.204340838                       | 636.4448002                                     | 578.300274                               | 0.954079455                        |
| 208.208076                               | 1.239236562                       | 844.0323505                                     | 2816.468451                              | 0.948081297                        |
| 86.05630095                              | 1.194085894                       | 718.2016681                                     | 1203.328273                              | 0.956015847                        |
| 78.98518881                              | 1.157718505                       | 396.8028549                                     | 1537.708655                              | 0.964997168                        |
| 128.5586098                              | 1.319526974                       | 772.4965347                                     | 2001.373726                              | 0.94093133                         |
| 190.3556593                              | 1.205458528                       | 342.7668502                                     | 2647.243591                              | 0.954079115                        |
| 488.9656605                              | 1.351537677                       | 289.6407652                                     | 4482.712193                              | 0.930370781                        |
| 66.67157708                              | 1.127228145                       | 1583.626314                                     | 1810.037694                              | 0.970776532                        |
| 4.997246628                              | 1.07106948                        | 383.181048                                      | 97.00440703                              | 0.98232263                         |
| 13.95525611                              | 1.103879373                       | 728.2450316                                     | 300.4694532                              | 0.974832281                        |
| 85.51617973                              | 1.171847691                       | 332.4600131                                     | 1738.111166                              | 0.962212873                        |
| 165.4666974                              | 1.219921496                       | 538.7273284                                     | 2378.649676                              | 0.952109923                        |
| 150.0498966                              | 1.184523545                       | 930.4138748                                     | 2862.843752                              | 0.96051844                         |
| 59.95542254                              | 1.229626019                       | 257.959323                                      | 686.3648091                              | 0.951208811                        |
| 41.30530621                              | 1.152853909                       | 860.5380029                                     | 912.792478                               | 0.965071226                        |
| 92.86123863                              | 1.205470898                       | 392.1589494                                     | 1228.480914                              | 0.954527189                        |
| 35.66107822                              | 1.138200185                       | 1151.412746                                     | 800.5963753                              | 0.968339433                        |
| 80.39523785                              | 1.174311771                       | 867.577509                                      | 1402.707361                              | 0.960370781                        |
| 50.75934091                              | 1.166737927                       | 554.3116589                                     | 880.0913705                              | 0.961611601                        |
| 103.6683348                              | 1.173547852                       | 496.4150132                                     | 1601.430208                              | 0.960041242                        |
| 86.2121284                               | 1.127607257                       | 763.5967763                                     | 1986.577043                              | 0.971103534                        |
| 144.9558069                              | 1.133093458                       | 1223.259181                                     | 3781.165417                              | 0.969786147                        |
| 30.61388102                              | 1.148115987                       | 355.3406391                                     | 507.748026                               | 0.965151621                        |
| 3.546971499                              | 1.063674111                       | 1283.327166                                     | 126.6474001                              | 0.985448994                        |
| 30.88539693                              | 1.155096838                       | 295.9247029                                     | 430.9477067                              | 0.96422817                         |
| 170.8444357                              | 1.212463542                       | 739.0678273                                     | 2860.512269                              | 0.955105429                        |
| 42.68671222                              | 1.175966986                       | 333.0726651                                     | 703.6618916                              | 0.959367383                        |
| 200.5424278                              | 1.190514                          | 557.0159024                                     | 3218.961975                              | 0.9571109                          |
| 36.09972605                              | 1.202722762                       | 272.5674846                                     | 494.1218167                              | 0.955193276                        |
| 476.7230911                              | 1.36419807                        | 2085.87298                                      | 4986.763105                              | 0.93341416                         |
| 24.68261472                              | 1.093244587                       | 1247.181214                                     | 805.7728671                              | 0.978073941                        |
| 110.8513177                              | 1.205088971                       | 1334.531441                                     | 1827.012582                              | 0.954162831                        |
| 78.32812431                              | 1.189409683                       | 150.0315048                                     | 1090.609923                              | 0.957351645                        |
| 32.35452762                              | 1.196076453                       | 755.9699531                                     | 688.882311                               | 0.958371359                        |
| 53.45752514                              | 1.223325277                       | 373.0329949                                     | 727.9908027                              | 0.952321859                        |
| 78.40759553                              | 1.140295779                       | 1151.395088                                     | 1869.20226                               | 0.968574736                        |
| 317.7753565                              | 1.189498126                       | 638.476167                                      | 4623.241596                              | 0.957535589                        |
| 212.1174167                              | 1.292671317                       | 443.847731                                      | 2439.898046                              | 0.941021835                        |
| 193.9270189                              | 1.453656753                       | 966.3654475                                     | 1975.074963                              | 0.920117435                        |
| 9.938751643                              | 1.106943928                       | 323.8263055                                     | 196.4145488                              | 0.974924331                        |
| 73.04545344                              | 1.172938558                       | 1344.960985                                     | 1336.186056                              | 0.962499282                        |
| 19.83318108                              | 1.121310909                       | 694.163157                                      | 350.9772442                              | 0.970816384                        |
| 139.6371509                              | 1.188300064                       | 1974.465346                                     | 2709.302133                              | 0.958604728                        |
| 17.62859449                              | 1.122679419                       | 604.9420135                                     | 398.0901146                              | 0.971350452                        |
| 113.215923                               | 1.15988426                        | 583.4163355                                     | 1735.810695                              | 0.963126441                        |
| 173.7094036                              | 1.247956337                       | 1286.719123                                     | 2467.518482                              | 0.947862563                        |
| 56.20221142                              | 1.186545609                       | 626.5470761                                     | 956.3019142                              | 0.958164262                        |
| 311.1366813                              | 1.307475073                       | 1714.83218                                      | 4075.597788                              | 0.941120954                        |
| 412.1525327                              | 1.324218628                       | 982.3799028                                     | 5224.164645                              | 0.937527494                        |
| 625.7163793                              | 1.262588832                       | 796.2924376                                     | 7366.357023                              | 0.945318772                        |
| 31.12478279                              | 1.09643281                        | 1149.981836                                     | 1021.300719                              | 0.977811675                        |
| 62.56048683                              | 1.180080762                       | 316.3689094                                     | 947.8746139                              | 0.958610524                        |
| 35.15696145                              | 1.161736882                       | 300.9010182                                     | 526.5344212                              | 0.962995365                        |
| 108.1568613                              | 1.207067951                       | 401.9103158                                     | 1467.064632                              | 0.953934005                        |
| 155.2112905                              | 1.183524919                       | 372.5623705                                     | 2410.992572                              | 0.958480666                        |
| 17.65411339                              | 1.120907967                       | 1154.543198                                     | 451.7203718                              | 0.972449435                        |
| 36.11908199                              | 1.074367813                       | 1628.329158                                     | 1249.409661                              | 0.982199804                        |
| 120.6384681                              | 1.123060233                       | 1169.736424                                     | 2492.044884                              | 0.971526885                        |
| 8.68548792                               | 1.163252169                       | 275.2909082                                     | 126.5584853                              | 0.965059211                        |
| 156.4045332                              | 1.164473151                       | 662.3053279                                     | 2927.294821                              | 0.963115816                        |
| 376.2069109                              | 1.252892795                       | 417.744034                                      | 4393.613909                              | 0.944895915                        |
| 26.64355534                              | 1.12256252                        | 932.3879022                                     | 696.4165078                              | 0.972247335                        |
| 67.74476127                              | 1.148115833                       | 658.8165723                                     | 1353.384186                              | 0.965538875                        |
| 8.561641353                              | 1.12180489                        | 314.8613946                                     | 163.2968891                              | 0.971045347                        |
| 4.52744088                               | 1.05643404                        | 805.8294366                                     | 99.33499819                              | 0.98589149                         |
| 178.8585774                              | 1.221699732                       | 1665.262702                                     | 3319.04025                               | 0.9552157                          |
| 24.03134238                              | 1.117986079                       | 1689.312563                                     | 632.3240851                              | 0.972186221                        |
| 50.7228136                               | 1.158303212                       | 333.1391254                                     | 884.285373                               | 0.963695597                        |
| 240.5153863                              | 1.304798263                       | 460.0675305                                     | 3206.112131                              | 0.939757752                        |
| 324.6573043                              | 1.278501167                       | 1224.453896                                     | 4640.904632                              | 0.944377913                        |
| 6.454634417                              | 1.075002702                       | 1750.871517                                     | 235.2982068                              | 0.981599612                        |
| 64.18139786                              | 1.17272002                        | 981.7379818                                     | 1041.18081                               | 0.961190718                        |
| 5.064979475                              | 1.061943902                       | 682.7983578                                     | 115.7717077                              | 0.984514024                        |
| 17.54312726                              | 1.143252352                       | 425.076724                                      | 331.7543704                              | 0.966243488                        |
| 33.68010831                              | 1.207116965                       | 1123.060811                                     | 676.7404466                              | 0.955884828                        |

| wavelet.HLL_glrIm_LongRunHighGrayLevelEmphasis | wavelet.HLL_glrIm_RunPercentage | wavelet.HLL_glrIm_LongRunLowGrayLevelEmphasis | wavelet.HLL_glrIm_RunEntropy | wavelet.HLL_glrIm_HighGrayLevelRunEmphasis |
|------------------------------------------------|---------------------------------|-----------------------------------------------|------------------------------|--------------------------------------------|
| 917.2703171                                    | 0.964044454                     | 0.004193034                                   | 5.248195765                  | 826.7814507                                |
| 1208.111602                                    | 0.911299581                     | 0.002440058                                   | 4.845496026                  | 917.9094142                                |
| 364.1701821                                    | 0.953739809                     | 0.00849427                                    | 4.660553072                  | 321.2785944                                |
| 2266.676607                                    | 0.954867902                     | 0.001119167                                   | 5.390523917                  | 1978.727073                                |
| 792.766614                                     | 0.936361688                     | 0.005710394                                   | 4.562926724                  | 659.9505594                                |
| 643.2774763                                    | 0.953941859                     | 0.004636388                                   | 4.914453441                  | 563.704251                                 |
| 406.8571751                                    | 0.934489843                     | 0.01075919                                    | 4.12380237                   | 332.3440561                                |
| 404.9912682                                    | 0.95355443                      | 0.007307715                                   | 4.788865858                  | 353.6141179                                |
| 1949.689102                                    | 0.961186961                     | 0.001350761                                   | 5.292473993                  | 1732.884906                                |
| 914.3303438                                    | 0.943685753                     | 0.002088252                                   | 4.583743138                  | 772.7791505                                |
| 265.1748803                                    | 0.938796391                     | 0.009488571                                   | 4.365058844                  | 221.6547385                                |
| 1198.870567                                    | 0.952351292                     | 0.00217447                                    | 5.080078893                  | 1047.162635                                |
| 1587.334455                                    | 0.931088198                     | 0.001540711                                   | 4.568983589                  | 1290.051265                                |
| 710.5260996                                    | 0.956515756                     | 0.004293088                                   | 5.148077272                  | 627.3289876                                |
| 1393.027996                                    | 0.956767711                     | 0.002263384                                   | 4.901280361                  | 1222.923877                                |
| 4101.375728                                    | 0.877246404                     | 0.000747494                                   | 4.700778935                  | 2726.440441                                |
| 765.7693709                                    | 0.944566894                     | 0.004002929                                   | 4.861794559                  | 654.2323818                                |
| 591.5216328                                    | 0.919613405                     | 0.003926379                                   | 4.689695848                  | 467.1417028                                |
| 1996.051443                                    | 0.970922548                     | 0.004855696                                   | 5.671483878                  | 1844.324044                                |
| 350.9574388                                    | 0.89143987                      | 0.008457133                                   | 4.350472218                  | 248.1950114                                |
| 1631.052901                                    | 0.923076923                     | 0.001391129                                   | 5.015375579                  | 1277.312136                                |
| 349.2500062                                    | 0.945125224                     | 0.007735099                                   | 4.544170036                  | 296.898669                                 |
| 2570.527095                                    | 0.952808888                     | 0.001061343                                   | 5.268151907                  | 2221.73867                                 |
| 710.0485894                                    | 0.962258116                     | 0.004941141                                   | 4.836800889                  | 636.7338736                                |
| 409.3778527                                    | 0.936940966                     | 0.005526033                                   | 4.452786384                  | 341.2895239                                |
| 801.0724341                                    | 0.939481268                     | 0.003822042                                   | 4.625111045                  | 666.5088001                                |
| 1097.925147                                    | 0.93066714                      | 0.001862891                                   | 4.638151289                  | 889.2685219                                |
| 889.9700516                                    | 0.942025874                     | 0.002644086                                   | 4.573092366                  | 749.9182668                                |
| 467.1396938                                    | 0.953335999                     | 0.005947592                                   | 4.89468662                   | 409.7768532                                |
| 1057.515808                                    | 0.916298493                     | 0.002632606                                   | 5.06813124                   | 817.2017909                                |
| 430.5825336                                    | 0.939095507                     | 0.004998967                                   | 4.58000331                   | 358.8397314                                |
| 415.4903462                                    | 0.905500065                     | 0.00544023                                    | 4.295719766                  | 310.4867009                                |
| 1825.737756                                    | 0.960989822                     | 0.001436943                                   | 5.408902294                  | 1629.154339                                |
| 416.0090763                                    | 0.977071006                     | 0.015010211                                   | 4.59108309                   | 389.7466537                                |
| 828.4730064                                    | 0.967099166                     | 0.005408224                                   | 4.927372104                  | 747.7753925                                |
| 641.4796936                                    | 0.949162224                     | 0.004277272                                   | 5.058988098                  | 552.179598                                 |
| 428.1988213                                    | 0.935924145                     | 0.006777235                                   | 4.711361206                  | 354.7156919                                |
| 1139.14678                                     | 0.946172194                     | 0.002015732                                   | 5.055557787                  | 967.3758268                                |
| 332.4092295                                    | 0.933763243                     | 0.007586823                                   | 4.296146796                  | 270.9960497                                |
| 1024.043432                                    | 0.953582166                     | 0.00338874                                    | 5.210990378                  | 891.0073104                                |
| 491.7507715                                    | 0.939202588                     | 0.004635493                                   | 4.540223602                  | 410.2237294                                |
| 1347.216686                                    | 0.957865849                     | 0.002495936                                   | 5.196580057                  | 1188.125874                                |
| 1053.115842                                    | 0.947531153                     | 0.002318338                                   | 4.914282936                  | 901.9576949                                |
| 672.2900248                                    | 0.949418386                     | 0.004073231                                   | 4.805435708                  | 576.3390548                                |
| 606.8041749                                    | 0.947284345                     | 0.003455662                                   | 4.646378755                  | 517.1345074                                |
| 777.8776724                                    | 0.961296782                     | 0.003311483                                   | 5.100496597                  | 692.7913246                                |
| 1419.664911                                    | 0.959410725                     | 0.001643867                                   | 5.392795127                  | 1259.676627                                |
| 418.3469248                                    | 0.953437539                     | 0.007899278                                   | 4.720558659                  | 367.3188637                                |
| 1371.456688                                    | 0.980482204                     | 0.0100165                                     | 5.464542371                  | 1299.243668                                |
| 355.9463085                                    | 0.95263891                      | 0.007512633                                   | 4.419459456                  | 307.1400416                                |
| 928.9512806                                    | 0.938982746                     | 0.002637918                                   | 4.982211242                  | 772.09436                                  |
| 405.981894                                     | 0.946609618                     | 0.006897949                                   | 4.73317596                   | 346.8490044                                |
| 688.7974003                                    | 0.943007268                     | 0.003094638                                   | 4.78305044                   | 581.271311                                 |
| 338.5448996                                    | 0.940127554                     | 0.008343978                                   | 4.494130739                  | 284.6779325                                |
| 3015.393205                                    | 0.906449369                     | 0.00086509                                    | 4.781387359                  | 2229.864919                                |
| 1389.633165                                    | 0.970858493                     | 0.003382862                                   | 5.539307317                  | 1274.120896                                |
| 1676.187539                                    | 0.939212179                     | 0.001528916                                   | 4.940033074                  | 1397.017554                                |
| 633.3997722                                    | 0.943363674                     | 0.003711389                                   | 4.575901193                  | 532.716598                                 |
| 931.8476093                                    | 0.943110943                     | 0.005130707                                   | 5.263577742                  | 786.8288301                                |
| 472.940348                                     | 0.935737361                     | 0.005879791                                   | 4.581546821                  | 390.6810764                                |
| 1836.989922                                    | 0.957708643                     | 0.001477614                                   | 5.282147744                  | 1620.126458                                |
| 787.9882041                                    | 0.943480215                     | 0.002381916                                   | 4.66193273                   | 665.9016646                                |
| 598.2261135                                    | 0.919591735                     | 0.003830744                                   | 4.56868559                   | 469.9741984                                |
| 1499.648347                                    | 0.887755964                     | 0.002155128                                   | 4.829136029                  | 1046.677339                                |
| 362.5942225                                    | 0.966678483                     | 0.018516912                                   | 4.787227628                  | 331.1716985                                |
| 1633.819534                                    | 0.949031651                     | 0.001881836                                   | 5.054468502                  | 1396.633285                                |
| 800.8161854                                    | 0.961928934                     | 0.004590888                                   | 4.664389114                  | 714.7721533                                |
| 2429.67443                                     | 0.944443108                     | 0.00097646                                    | 5.117607492                  | 2056.678939                                |
| 699.9228108                                    | 0.962055881                     | 0.005528794                                   | 5.027967785                  | 622.9346901                                |
| 695.3803917                                    | 0.951229775                     | 0.002971486                                   | 4.662513801                  | 604.4284096                                |
| 1680.945612                                    | 0.929529352                     | 0.001507578                                   | 4.876433652                  | 1355.371636                                |
| 768.1662124                                    | 0.944470941                     | 0.004660971                                   | 4.847912842                  | 652.5589292                                |
| 2367.218415                                    | 0.91783758                      | 0.001080771                                   | 4.984729445                  | 1819.645531                                |
| 1365.448348                                    | 0.913673432                     | 0.001698659                                   | 4.920390066                  | 1044.486881                                |
| 1055.819699                                    | 0.925741579                     | 0.001780795                                   | 4.555566631                  | 841.0881981                                |
| 1285.965424                                    | 0.97008547                      | 0.002552887                                   | 5.53217302                   | 1175.588413                                |
| 383.9029012                                    | 0.945596033                     | 0.007784999                                   | 4.648138956                  | 329.0424404                                |
| 356.4378136                                    | 0.951071879                     | 0.01215105                                    | 4.57554341                   | 311.2541773                                |
| 503.0250307                                    | 0.938731903                     | 0.004372824                                   | 4.546615469                  | 420.3685253                                |
| 455.1851544                                    | 0.944861884                     | 0.005262987                                   | 4.68473707                   | 387.8346548                                |
| 1332.597576                                    | 0.963064713                     | 0.00401857                                    | 5.280063629                  | 1187.559388                                |
| 1776.34565                                     | 0.976366661                     | 0.001822308                                   | 5.612531918                  | 1656.915893                                |
| 1346.414601                                    | 0.962006833                     | 0.001488951                                   | 4.994063267                  | 1202.931119                                |
| 326.6921662                                    | 0.952785146                     | 0.026453141                                   | 4.523164312                  | 284.2424091                                |
| 789.1372925                                    | 0.950661253                     | 0.002747557                                   | 4.980534904                  | 685.5631219                                |
| 549.348896                                     | 0.926771366                     | 0.00364662                                    | 4.47153124                   | 441.2949671                                |
| 1066.12104                                     | 0.96252719                      | 0.003381028                                   | 5.29402369                   | 957.1115828                                |
| 779.3076074                                    | 0.954599524                     | 0.002921654                                   | 4.918924734                  | 681.5844625                                |
| 360.9977737                                    | 0.962168979                     | 0.015444918                                   | 4.73718078                   | 323.7763727                                |
| 862.845196                                     | 0.981684982                     | 0.013972685                                   | 4.799126593                  | 817.2325885                                |
| 2117.629457                                    | 0.937784228                     | 0.001124925                                   | 5.159199406                  | 1741.649828                                |
| 1929.543872                                    | 0.963390717                     | 0.002261002                                   | 5.299238225                  | 1735.200847                                |
| 398.8887352                                    | 0.951828993                     | 0.00850434                                    | 4.78025755                   | 345.3696226                                |
| 626.3596647                                    | 0.916870416                     | 0.003736968                                   | 4.756099672                  | 487.5429284                                |
| 1641.765376                                    | 0.923394897                     | 0.001312796                                   | 4.907110887                  | 1294.057922                                |
| 1905.229135                                    | 0.975980541                     | 0.005423892                                   | 5.572437049                  | 1781.490834                                |
| 1195.474724                                    | 0.948190789                     | 0.002300768                                   | 4.809255023                  | 1021.070784                                |
| 743.4117533                                    | 0.979987492                     | 0.015028006                                   | 4.906760465                  | 694.9210369                                |
| 499.9740565                                    | 0.955956972                     | 0.007428559                                   | 4.843478936                  | 439.3096715                                |
| 1401.514199                                    | 0.940234487                     | 0.002920835                                   | 5.266772764                  | 1171.905523                                |

| wavelet.HLL_glrjm_RunLengthNonUniformityNormalized | wavelet.HLL_glszm_GrayLevelVariance | wavelet.HLL_glszm_SmallAreaHighGrayLevelEmphasis | wavelet.HLL_glszm_GrayLevelNonUniformityNormalized |
|----------------------------------------------------|-------------------------------------|--------------------------------------------------|----------------------------------------------------|
| 0.93385706                                         | 89.07515624                         | 692.2614837                                      | 0.030831507                                        |
| 0.847529                                           | 55.10249015                         | 691.6535517                                      | 0.041388677                                        |
| 0.912835171                                        | 41.73456597                         | 256.0546568                                      | 0.044409722                                        |
| 0.916841566                                        | 107.4724313                         | 1537.371316                                      | 0.029096296                                        |
| 0.880129723                                        | 48.54183594                         | 468.5683452                                      | 0.04984375                                         |
| 0.91308697                                         | 52.69421324                         | 421.4320809                                      | 0.03930506                                         |
| 0.878707841                                        | 23.01750645                         | 230.3722816                                      | 0.067446935                                        |
| 0.910806915                                        | 41.67616129                         | 261.6443245                                      | 0.043446908                                        |
| 0.926062514                                        | 91.70242265                         | 1289.39317                                       | 0.03195543                                         |
| 0.895198826                                        | 34.6649259                          | 564.9381251                                      | 0.048080864                                        |
| 0.884666447                                        | 24.05807722                         | 158.456349                                       | 0.057157154                                        |
| 0.910612954                                        | 74.29058456                         | 839.1448887                                      | 0.035094211                                        |
| 0.871897357                                        | 34.21198662                         | 875.3278164                                      | 0.051833123                                        |
| 0.917342919                                        | 67.33400996                         | 455.7075652                                      | 0.035156399                                        |
| 0.917504924                                        | 56.39000769                         | 898.3814425                                      | 0.040399846                                        |
| 0.799258865                                        | 64.96312716                         | 1981.128656                                      | 0.041277644                                        |
| 0.897951251                                        | 61.49317329                         | 536.7191757                                      | 0.039925781                                        |
| 0.853746919                                        | 37.8760208                          | 365.1865125                                      | 0.046510282                                        |
| 0.943656848                                        | 184.3140741                         | 1594.129846                                      | 0.023465935                                        |
| 0.816118238                                        | 26.12687881                         | 178.3516136                                      | 0.055038339                                        |
| 0.866865825                                        | 73.74340494                         | 991.2330883                                      | 0.03522837                                         |
| 0.89732504                                         | 30.29266167                         | 208.1471785                                      | 0.051438422                                        |
| 0.913352405                                        | 92.06536583                         | 1666.67008                                       | 0.031379145                                        |
| 0.926115539                                        | 53.31809715                         | 473.9622885                                      | 0.041045208                                        |
| 0.883013065                                        | 30.59521609                         | 263.847008                                       | 0.052966094                                        |
| 0.886394531                                        | 40.4040251                          | 498.0098854                                      | 0.04727436                                         |
| 0.872745501                                        | 36.74254101                         | 630.9997293                                      | 0.047461145                                        |
| 0.890900189                                        | 34.57060376                         | 566.8191697                                      | 0.049885216                                        |
| 0.912895126                                        | 47.4100162                          | 321.5835641                                      | 0.040987074                                        |
| 0.858123229                                        | 73.81012465                         | 652.7848459                                      | 0.034018876                                        |
| 0.886380073                                        | 32.00473202                         | 259.6106219                                      | 0.049243702                                        |
| 0.834073017                                        | 23.00799594                         | 221.1327878                                      | 0.059352569                                        |
| 0.926083748                                        | 109.7929852                         | 1288.385494                                      | 0.027794947                                        |
| 0.954201017                                        | 48.00467452                         | 319.3486842                                      | 0.047091413                                        |
| 0.935588951                                        | 61.69767102                         | 558.8435693                                      | 0.038176852                                        |
| 0.905879828                                        | 61.30250186                         | 407.0544461                                      | 0.037190068                                        |
| 0.882013117                                        | 41.93679566                         | 275.5888707                                      | 0.044429906                                        |
| 0.901738145                                        | 65.32764369                         | 716.4345767                                      | 0.035669732                                        |
| 0.880038684                                        | 24.29051053                         | 194.2723899                                      | 0.057898232                                        |
| 0.912177593                                        | 87.21753056                         | 681.2790261                                      | 0.032255556                                        |
| 0.887260811                                        | 35.76402308                         | 317.2049964                                      | 0.048199988                                        |
| 0.920322499                                        | 83.38056569                         | 877.5297399                                      | 0.031960069                                        |
| 0.901120161                                        | 61.41345514                         | 658.1000702                                      | 0.038951872                                        |
| 0.903937763                                        | 46.79103248                         | 412.7955456                                      | 0.042515765                                        |
| 0.899999791                                        | 36.0563825                          | 362.0584398                                      | 0.046907034                                        |
| 0.927010354                                        | 64.17232553                         | 531.4090817                                      | 0.035218863                                        |
| 0.923586771                                        | 102.0777306                         | 993.3678386                                      | 0.029002647                                        |
| 0.912222143                                        | 44.90473108                         | 287.8749404                                      | 0.04470074                                         |
| 0.963111586                                        | 256.3211265                         | 1165.163739                                      | 0.024798155                                        |
| 0.909996825                                        | 27.90597633                         | 225.5297852                                      | 0.054970414                                        |
| 0.889193372                                        | 63.99861484                         | 587.052985                                       | 0.036876261                                        |
| 0.898521891                                        | 40.49617673                         | 237.016628                                       | 0.044720264                                        |
| 0.893188599                                        | 42.63977464                         | 416.3360814                                      | 0.043178331                                        |
| 0.889021103                                        | 31.24627999                         | 198.6600551                                      | 0.051212102                                        |
| 0.841856087                                        | 72.71549009                         | 1653.674101                                      | 0.039105426                                        |
| 0.943872312                                        | 130.8883574                         | 1000.412546                                      | 0.026034483                                        |
| 0.886621261                                        | 68.85623196                         | 979.4094644                                      | 0.03859576                                         |
| 0.893853608                                        | 35.4944                             | 379.5115704                                      | 0.04845                                            |
| 0.89688249                                         | 104.9053206                         | 670.4884                                         | 0.028213984                                        |
| 0.882602038                                        | 35.64181363                         | 295.3318181                                      | 0.048763029                                        |
| 0.920715107                                        | 91.7676803                          | 1249.181173                                      | 0.031295345                                        |
| 0.894282444                                        | 37.92988026                         | 491.6548064                                      | 0.046466946                                        |
| 0.857703653                                        | 35.5345362                          | 347.7547767                                      | 0.048602398                                        |
| 0.813307571                                        | 74.2529292                          | 779.4550488                                      | 0.037348063                                        |
| 0.936050193                                        | 51.02530612                         | 281.9339188                                      | 0.043061224                                        |
| 0.906286092                                        | 80.05564905                         | 1049.689907                                      | 0.034469952                                        |
| 0.925772324                                        | 43.84561698                         | 548.5245456                                      | 0.045899201                                        |
| 0.89696833                                         | 73.36133058                         | 1532.484475                                      | 0.03439142                                         |
| 0.927389546                                        | 65.53978498                         | 460.7204276                                      | 0.036711147                                        |
| 0.907267313                                        | 39.84832949                         | 456.8007575                                      | 0.045446062                                        |
| 0.872591951                                        | 67.63970796                         | 1009.464695                                      | 0.038521881                                        |
| 0.896185424                                        | 50.95796267                         | 486.6585752                                      | 0.042117833                                        |
| 0.858234323                                        | 93.01173582                         | 1397.685617                                      | 0.034050649                                        |
| 0.850237053                                        | 72.2497246                          | 801.2362618                                      | 0.036364821                                        |
| 0.866576538                                        | 35.50959551                         | 612.3987527                                      | 0.049175057                                        |
| 0.943189815                                        | 120.8082403                         | 909.6915588                                      | 0.026336629                                        |
| 0.896937079                                        | 37.19205601                         | 245.7132638                                      | 0.047383038                                        |
| 0.907195199                                        | 34.29000534                         | 246.2360218                                      | 0.049528178                                        |
| 0.885787675                                        | 33.76855336                         | 317.9949864                                      | 0.049661895                                        |
| 0.896402619                                        | 36.66321592                         | 285.1746372                                      | 0.046681536                                        |
| 0.93023304                                         | 104.3034921                         | 885.9943352                                      | 0.030949861                                        |
| 0.954060176                                        | 146.6717171                         | 1357.45948                                       | 0.02509861                                         |
| 0.927639417                                        | 58.77810977                         | 939.454244                                       | 0.037482551                                        |
| 0.914144906                                        | 46.49220914                         | 221.0395005                                      | 0.049515235                                        |
| 0.907662693                                        | 57.11815067                         | 518.5490368                                      | 0.03901114                                         |
| 0.865506428                                        | 31.54457611                         | 316.6338386                                      | 0.051688806                                        |
| 0.929693253                                        | 106.1013256                         | 775.2910417                                      | 0.029466409                                        |
| 0.913169424                                        | 45.87486759                         | 479.6085865                                      | 0.041794869                                        |
| 0.926770922                                        | 54.56232687                         | 263.807379                                       | 0.041859034                                        |
| 0.963400779                                        | 70.24851212                         | 687.8415328                                      | 0.041660618                                        |
| 0.889781012                                        | 83.69900076                         | 1274.364461                                      | 0.033306154                                        |
| 0.929287663                                        | 103.1472519                         | 1373.692693                                      | 0.029648178                                        |
| 0.908797735                                        | 44.91034066                         | 249.9152107                                      | 0.042080589                                        |
| 0.854555765                                        | 42.59732575                         | 370.3726282                                      | 0.043513511                                        |
| 0.865026407                                        | 62.63818657                         | 979.2676938                                      | 0.038191748                                        |
| 0.952586525                                        | 189.0058623                         | 1561.717693                                      | 0.024393034                                        |
| 0.902830894                                        | 59.2428359                          | 732.6157429                                      | 0.041481705                                        |
| 0.960028118                                        | 84.84640832                         | 524.6942935                                      | 0.038043478                                        |
| 0.915053566                                        | 52.62922984                         | 319.1154032                                      | 0.041651257                                        |
| 0.89120185                                         | 116.9222377                         | 988.1131407                                      | 0.029050673                                        |

| wavelet.HLL_glszm_SizeZoneNonUniformityNormalized | wavelet.HLL_glszm_SizeZoneNonUniformity | wavelet.HLL_glszm_GrayLevelNonUniformity | wavelet.HLL_glszm_LargeAreaEmphasis | wavelet.HLL_glszm_ZoneVariance |
|---------------------------------------------------|-----------------------------------------|------------------------------------------|-------------------------------------|--------------------------------|
| 0.588355247                                       | 261.2297297                             | 13.68918919                              | 7.103603604                         | 4.575217109                    |
| 0.453677229                                       | 385.171967                              | 35.13898704                              | 122.3239105                         | 116.3390006                    |
| 0.495208333                                       | 18.85                                   | 10.65833333                              | 6.675                               | 3.404930556                    |
| 0.533418393                                       | 840.1339683                             | 45.82666667                              | 13.31873016                         | 10.51974805                    |
| 0.395234375                                       | 63.2375                                 | 7.975                                    | 12.29375                            | 7.259335938                    |
| 0.485136742                                       | 168.8275862                             | 13.67816092                              | 8.41091954                          | 4.996920003                    |
| 0.459432652                                       | 65.23943662                             | 9.577464789                              | 21.21830986                         | 15.58604444                    |
| 0.442897061                                       | 228.5348837                             | 22.41860465                              | 8.093023256                         | 4.3220119                      |
| 0.505909299                                       | 637.9516257                             | 40.29579699                              | 4.982553529                         | 2.264369818                    |
| 0.451869774                                       | 651.1443442                             | 69.28452464                              | 18.01526718                         | 13.39321477                    |
| 0.448298683                                       | 157.8011364                             | 20.11931818                              | 20.26420455                         | 14.74437468                    |
| 0.521025815                                       | 425.6780906                             | 28.67197062                              | 9.429620563                         | 6.139193305                    |
| 0.407925125                                       | 322.6687737                             | 41                                       | 25.63843236                         | 18.76356162                    |
| 0.463468734                                       | 290.5948963                             | 22.0430622                               | 6.124401914                         | 2.944977348                    |
| 0.478408304                                       | 243.9882353                             | 20.60392157                              | 6.311764706                         | 3.120988082                    |
| 0.46968036                                        | 1096.70364                              | 96.38329764                              | 1281.719486                         | 1272.867905                    |
| 0.527425883                                       | 184.0716332                             | 13.93409742                              | 14.06876791                         | 10.06876791                    |
| 0.439300514                                       | 374.2840376                             | 39.62676056                              | 53.79107981                         | 46.29942251                    |
| 0.623789057                                       | 252.6345679                             | 9.503703704                              | 3.871604938                         | 1.806529492                    |
| 0.398212177                                       | 337.2857143                             | 46.61747344                              | 248.9268005                         | 237.9907779                    |
| 0.512072227                                       | 1195.688651                             | 82.25824411                              | 221.9897216                         | 216.9843933                    |
| 0.418830276                                       | 332.1324086                             | 40.79066835                              | 12.60529634                         | 7.900828339                    |
| 0.526396777                                       | 818.020592                              | 48.76319176                              | 11.68275418                         | 8.594298518                    |
| 0.469585437                                       | 131.0143369                             | 11.4516129                               | 5                                   | 2.027774566                    |
| 0.455845501                                       | 236.583815                              | 27.4894027                               | 20.95568401                         | 15.57399921                    |
| 0.480402884                                       | 157.0917431                             | 15.4587156                               | 15.19877676                         | 10.69451692                    |
| 0.434594607                                       | 607.9978556                             | 66.39814153                              | 47.57398142                         | 41.43605486                    |
| 0.47137741                                        | 311.1090909                             | 32.92424242                              | 16.07121212                         | 11.35705005                    |
| 0.480531334                                       | 456.024236                              | 38.8967334                               | 8.458377239                         | 4.999326006                    |
| 0.504281978                                       | 581.4371206                             | 39.22376409                              | 97.08586297                         | 92.22523392                    |
| 0.438356604                                       | 623.7814476                             | 70.07378777                              | 22.37737175                         | 17.38655923                    |
| 0.398458063                                       | 745.1165775                             | 110.9893048                              | 293.6470588                         | 283.5910378                    |
| 0.530408053                                       | 638.6112957                             | 33.46511628                              | 33.46511628                         | 3.538373611                    |
| 0.58033241                                        | 44.10526316                             | 3.578947368                              | 2.368421053                         | 0.495844875                    |
| 0.564646275                                       | 123.6575342                             | 8.360730594                              | 3.570776256                         | 1.272575634                    |
| 0.460672091                                       | 482.7843511                             | 38.97519084                              | 10.34923664                         | 6.63405396                     |
| 0.456041679                                       | 574.1564734                             | 55.93725179                              | 23.52343129                         | 18.29063877                    |
| 0.495032883                                       | 881.6535654                             | 63.52779337                              | 25.81695677                         | 22.27047054                    |
| 0.429640229                                       | 140.4923547                             | 18.93272171                              | 30.73700306                         | 24.21655491                    |
| 0.505327778                                       | 303.1966667                             | 19.35333333                              | 8.401666667                         | 5.34497222                     |
| 0.490845522                                       | 321.5038168                             | 31.57099237                              | 28.30839695                         | 23.24417924                    |
| 0.492217086                                       | 263.8283582                             | 17.13059701                              | 17.31156164                         | 4.150336239                    |
| 0.445846108                                       | 357.5685786                             | 31.2394015                               | 15.56857855                         | 11.37680736                    |
| 0.462284402                                       | 239.4633205                             | 22.02316602                              | 9.113899614                         | 5.198390751                    |
| 0.437168978                                       | 387.7688839                             | 41.6065389                               | 11.82638106                         | 7.343637078                    |
| 0.504690921                                       | 664.1732523                             | 46.34802432                              | 5.603343465                         | 2.73706359                     |
| 0.540190971                                       | 1376.406593                             | 73.89874411                              | 6.605180534                         | 3.802053015                    |
| 0.499771881                                       | 153.4299674                             | 13.72312704                              | 9.390879479                         | 5.784591879                    |
| 0.609573241                                       | 62.17647059                             | 2.529411765                              | 2.117647059                         | 0.391772395                    |
| 0.498313609                                       | 129.5615385                             | 14.29230769                              | 9.173076923                         | 5.519097633                    |
| 0.465423645                                       | 770.2761329                             | 61.03021148                              | 30.65377644                         | 26.37350298                    |
| 0.431903088                                       | 169.7379135                             | 17.57506361                              | 11.66666667                         | 7.238480016                    |
| 0.441481514                                       | 797.3156146                             | 77.98006645                              | 19.30398671                         | 14.82769291                    |
| 0.402659805                                       | 102.2755906                             | 13.0078402                               | 17.22440945                         | 11.81054312                    |
| 0.46889962                                        | 1125.827988                             | 93.89212828                              | 425.8621408                         | 418.4812218                    |
| 0.545416026                                       | 323.4317032                             | 15.43844857                              | 3.294323272                         | 1.096229479                    |
| 0.442070937                                       | 439.4185111                             | 38.36418511                              | 21.82193159                         | 16.95444802                    |
| 0.452866667                                       | 271.72                                  | 29.07                                    | 13.47166667                         | 8.827641667                    |
| 0.604289337                                       | 274.9516484                             | 12.83736264                              | 22.87912088                         | 19.67856056                    |
| 0.46868545                                        | 179.5065274                             | 18.67624021                              | 26.38903394                         | 21.09783283                    |
| 0.517131325                                       | 627.2802968                             | 37.96125309                              | 7.598516076                         | 4.546826799                    |
| 0.472209339                                       | 1228.688701                             | 120.9069946                              | 29.74019985                         | 25.30789655                    |
| 0.451048492                                       | 562.0064205                             | 60.55858748                              | 127.6340289                         | 121.4839473                    |
| 0.472144518                                       | 444.2879915                             | 35.1445271                               | 353.9968119                         | 345.5738632                    |
| 0.542346939                                       | 75.92857143                             | 6.028571429                              | 3.907142857                         | 1.506424857                    |
| 0.516163227                                       | 426.8669891                             | 17.904474                                | 17.904474                           | 14.37807141                    |
| 0.527278275                                       | 120.7467249                             | 10.51091703                              | 6.934497817                         | 3.974294922                    |
| 0.488091509                                       | 785.8273292                             | 55.37018634                              | 18.34099379                         | 14.39793256                    |
| 0.498222714                                       | 130.5343511                             | 9.618320611                              | 5.229007634                         | 2.33121613                     |
| 0.45046961                                        | 450.9200799                             | 45.49150849                              | 9.851148851                         | 5.815103977                    |
| 0.471136492                                       | 619.5444867                             | 50.65627376                              | 37.98174905                         | 32.63738958                    |
| 0.445303171                                       | 243.1355311                             | 22.996337                                | 11.1007326                          | 6.825078157                    |
| 0.50903445                                        | 1120.384825                             | 74.94547933                              | 181.2676056                         | 175.7543907                    |
| 0.478850756                                       | 1317.31843                              | 100.039622                               | 199.3282443                         | 193.3683275                    |
| 0.454280075                                       | 1713.090162                             | 185.4391408                              | 254.6825776                         | 248.7564322                    |
| 0.550835144                                       | 408.7196765                             | 19.54177898                              | 3.474393531                         | 1.212247804                    |
| 0.441217365                                       | 235.1688555                             | 25.25515947                              | 10.94371482                         | 6.551820028                    |
| 0.455996481                                       | 140.9029126                             | 15.30420712                              | 8.8802589                           | 4.98314848                     |
| 0.445871294                                       | 335.2952128                             | 37.34574468                              | 19.69414894                         | 14.19163083                    |
| 0.435556117                                       | 581.4674157                             | 62.31985019                              | 13.13558052                         | 8.590859179                    |
| 0.540418241                                       | 170.231746                              | 9.749206349                              | 4.812698413                         | 2.252698413                    |
| 0.598385954                                       | 579.2376033                             | 24.29545455                              | 2.645661157                         | 0.726520345                    |
| 0.527419238                                       | 882.3723849                             | 62.70830843                              | 5.254034668                         | 2.468946515                    |
| 0.409972299                                       | 31.15789474                             | 3.763157895                              | 6.592105263                         | 2.952042936                    |
| 0.470916651                                       | 836.347973                              | 69.28378378                              | 10.61655405                         | 6.970948672                    |
| 0.432873132                                       | 873.1051066                             | 104.2563213                              | 80.10609817                         | 72.73529044                    |
| 0.552671671                                       | 256.4396552                             | 13.67241379                              | 7.49137931                          | 4.679975476                    |
| 0.440648288                                       | 367.060024                              | 34.81512605                              | 6.629051621                         | 3.157741368                    |
| 0.546168052                                       | 62.26315789                             | 4.771929825                              | 4.48245614                          | 1.905586334                    |
| 0.673682683                                       | 55.91566265                             | 3.457831325                              | 1.987951807                         | 0.387574394                    |
| 0.491770186                                       | 976.6555891                             | 66.14602216                              | 47.98539778                         | 43.97935321                    |
| 0.536307971                                       | 233.8302752                             | 12.9266055                               | 5.54587156                          | 2.923849003                    |
| 0.473069071                                       | 249.3074004                             | 22.17647059                              | 9.028462998                         | 5.267660201                    |
| 0.450679851                                       | 735.960196                              | 71.05756277                              | 107.10594                           | 100.832955                     |
| 0.481724094                                       | 1166.735756                             | 92.50041288                              | 174.0536746                         | 168.3071432                    |
| 0.630587091                                       | 117.9197861                             | 4.561497326                              | 2.443850267                         | 0.61340044                     |
| 0.468214043                                       | 277.6509275                             | 24.59865093                              | 17.55480607                         | 13.34988582                    |
| 0.621691871                                       | 57.19565217                             | 3.5                                      | 2.293478261                         | 0.50602552                     |
| 0.427653476                                       | 88.95192308                             | 8.663461538                              | 6.447115385                         | 3.12701091                     |
| 0.564162754                                       | 240.3333333                             | 12.37558685                              | 14.42018779                         | 10.8315645                     |

| wavelet.HLL_glszm_ZonePercentage | wavelet.HLL_glszm_LargeAreaLowGrayLevelEmphasis | wavelet.HLL_glszm_LargeAreaHighGrayLevelEmphasis | wavelet.HLL_glszm_HighGrayLevelZoneEmphasis |
|----------------------------------|-------------------------------------------------|--------------------------------------------------|---------------------------------------------|
| 0.628895184                      | 0.014358365                                     | 5634.617117                                      | 857.5135135                                 |
| 0.408762638                      | 0.145472507                                     | 104930.6337                                      | 962.5382803                                 |
| 0.55295392                       | 0.034245821                                     | 1894.75                                          | 341.7458333                                 |
| 0.59772296                       | 0.008237163                                     | 24381.91302                                      | 2011.47873                                  |
| 0.445682451                      | 0.028801615                                     | 7723.3625                                        | 691.48125                                   |
| 0.541213064                      | 0.023094981                                     | 4168.405172                                      | 583.2816092                                 |
| 0.421364985                      | 0.08302161                                      | 6975.626761                                      | 332.2323944                                 |
| 0.51497006                       | 0.037434269                                     | 2623.569767                                      | 368.4728682                                 |
| 0.606541607                      | 0.004165793                                     | 8549.23632                                       | 1738.607454                                 |
| 0.465138799                      | 0.025823618                                     | 13386.75503                                      | 796.3636364                                 |
| 0.425634825                      | 0.114185317                                     | 4270.627841                                      | 225.9886364                                 |
| 0.551282051                      | 0.01196028                                      | 9064.760098                                      | 1096.567931                                 |
| 0.381388621                      | 0.0223663                                       | 32038.5019                                       | 1316.865992                                 |
| 0.560822898                      | 0.016633776                                     | 3536.366826                                      | 644.7894737                                 |
| 0.559824369                      | 0.00763691                                      | 7713.662745                                      | 1234.22549                                  |
| 0.336116309                      | 0.487553136                                     | 3374208.043                                      | 2781.359315                                 |
| 0.5                              | 0.029087629                                     | 8197.426934                                      | 697.8624642                                 |
| 0.36535163                       | 0.129040681                                     | 23822.77113                                      | 510.0199531                                 |
| 0.695876289                      | 0.013079764                                     | 6527.093827                                      | 1914.874074                                 |
| 0.302392003                      | 1.069116181                                     | 59130.79103                                      | 266.94451                                   |
| 0.446975498                      | 0.180208211                                     | 275134.6565                                      | 1316.736188                                 |
| 0.461046512                      | 0.056266306                                     | 3636.472888                                      | 304.9407314                                 |
| 0.569022336                      | 0.006462396                                     | 24863.49035                                      | 2231.633848                                 |
| 0.58004158                       | 0.014131275                                     | 3064.734767                                      | 653.655914                                  |
| 0.431063123                      | 0.076489576                                     | 6425.589595                                      | 363.8863198                                 |
| 0.471181556                      | 0.027468381                                     | 10097.55657                                      | 679.5504587                                 |
| 0.403635314                      | 0.056986463                                     | 40922.25161                                      | 911.151368                                  |
| 0.460572226                      | 0.025616655                                     | 11370.01667                                      | 776.3075758                                 |
| 0.537677054                      | 0.035089175                                     | 3029.613277                                      | 434.28451                                   |
| 0.453579858                      | 0.135144731                                     | 71247.14657                                      | 865.5516045                                 |
| 0.447625039                      | 0.072568276                                     | 7585.88967                                       | 369.9908644                                 |
| 0.3153457                        | 1.025269768                                     | 84992.96952                                      | 329.8572193                                 |
| 0.592228234                      | 0.005509406                                     | 10027.71096                                      | 1673.456811                                 |
| 0.730769231                      | 0.023497989                                     | 934.7763158                                      | 393.6710526                                 |
| 0.659638554                      | 0.01076671                                      | 2717.442922                                      | 732.4840183                                 |
| 0.518811881                      | 0.026826278                                     | 5343.296756                                      | 571.726145                                  |
| 0.437152778                      | 0.080708018                                     | 8123.416998                                      | 377.1262907                                 |
| 0.531007752                      | 0.030268498                                     | 23389.9781                                       | 983.9859629                                 |
| 0.391616766                      | 0.129586609                                     | 8113.076453                                      | 280.1926606                                 |
| 0.571973308                      | 0.013615558                                     | 7317.421667                                      | 905.845                                     |
| 0.444369064                      | 0.076498919                                     | 11259.69466                                      | 425.751145                                  |
| 0.562434418                      | 0.009368408                                     | 8332.352612                                      | 1205.255597                                 |
| 0.488428745                      | 0.020285626                                     | 13537.81297                                      | 929.6783042                                 |
| 0.505365854                      | 0.021300741                                     | 5139.359073                                      | 579.4382239                                 |
| 0.472310969                      | 0.026079006                                     | 6286.519729                                      | 517.9751973                                 |
| 0.590664273                      | 0.012493266                                     | 3697.394377                                      | 707.81231                                   |
| 0.597280825                      | 0.007088098                                     | 7940.455259                                      | 1288.728807                                 |
| 0.526586621                      | 0.038950498                                     | 3193.394133                                      | 385.0488599                                 |
| 0.76119403                       | 0.014695735                                     | 2611.764706                                      | 1364.166667                                 |
| 0.523138833                      | 0.037408325                                     | 2944.388462                                      | 305.7692308                                 |
| 0.483352804                      | 0.044156861                                     | 22765.44109                                      | 804.5619335                                 |
| 0.475211608                      | 0.047146761                                     | 3772.211196                                      | 352.697201                                  |
| 0.472651138                      | 0.038100398                                     | 10705.60797                                      | 595.1760797                                 |
| 0.429780034                      | 0.083857259                                     | 4414.964567                                      | 298.0669291                                 |
| 0.368082171                      | 0.200118169                                     | 909723.1995                                      | 2304.48105                                  |
| 0.674630262                      | 0.007057882                                     | 4148.155143                                      | 1288.150084                                 |
| 0.453260374                      | 0.017787476                                     | 29399.82394                                      | 1419.012072                                 |
| 0.464037123                      | 0.02889953                                      | 7350.508333                                      | 534.57                                      |
| 0.558968059                      | 0.037407338                                     | 17030.41538                                      | 820.7912088                                 |
| 0.434733258                      | 0.081574558                                     | 9582.464752                                      | 409.9582245                                 |
| 0.57243983                       | 0.006419317                                     | 11669.45754                                      | 1658.047815                                 |
| 0.474990873                      | 0.048891319                                     | 18850.98232                                      | 681.4938509                                 |
| 0.403236246                      | 0.317401211                                     | 52064.55538                                      | 491.9020867                                 |
| 0.344562431                      | 0.361559404                                     | 349172.4123                                      | 1086.858661                                 |
| 0.64516129                       | 0.054315941                                     | 1155.528571                                      | 351.8                                       |
| 0.532517708                      | 0.015394317                                     | 23927.51874                                      | 1408.116082                                 |
| 0.581218274                      | 0.015437247                                     | 4840.528384                                      | 721.8908297                                 |
| 0.503597122                      | 0.010185363                                     | 36043.04286                                      | 2100.87764                                  |
| 0.587443946                      | 0.016054979                                     | 3188.973282                                      | 626.0725191                                 |
| 0.497762307                      | 0.019910896                                     | 5665.794206                                      | 631.6353646                                 |
| 0.432565789                      | 0.030382144                                     | 49890.3384                                       | 1398.419011                                 |
| 0.483613818                      | 0.027702182                                     | 7014.380952                                      | 680.7289377                                 |
| 0.425890093                      | 0.101480793                                     | 326833.3757                                      | 1866.527488                                 |
| 0.409618821                      | 0.205409358                                     | 194844.3839                                      | 1093.808433                                 |
| 0.410784314                      | 0.318473633                                     | 204517.0883                                      | 863.5937417                                 |
| 0.664874552                      | 0.005942635                                     | 3997.512129                                      | 1181.706199                                 |
| 0.477170994                      | 0.048500929                                     | 3320.538462                                      | 346.4371482                                 |
| 0.506557377                      | 0.070798005                                     | 2399.627832                                      | 337.9967638                                 |
| 0.426303855                      | 0.055588783                                     | 7768.644947                                      | 443.5079787                                 |
| 0.46907941                       | 0.043595505                                     | 4796.43221                                       | 405.3895131                                 |
| 0.625                            | 0.009364759                                     | 5598.847619                                      | 1175.774603                                 |
| 0.721849366                      | 0.003434683                                     | 4216.338843                                      | 1680.672521                                 |
| 0.599212034                      | 0.005545454                                     | 6150.885236                                      | 1225.860132                                 |
| 0.524137931                      | 0.08422837                                      | 1803.5                                           | 307.1447368                                 |
| 0.52373931                       | 0.020399276                                     | 6443.439189                                      | 717.6891892                                 |
| 0.368334551                      | 0.196494955                                     | 33562.52405                                      | 458.826475                                  |
| 0.596401028                      | 0.012506112                                     | 6649.344828                                      | 993.0883621                                 |
| 0.536726804                      | 0.013888742                                     | 4256.190876                                      | 693.3421369                                 |
| 0.62295082                       | 0.034775268                                     | 1391.114035                                      | 334.6842105                                 |
| 0.79047619                       | 0.01832966                                      | 1622.746988                                      | 814.2891566                                 |
| 0.499622642                      | 0.030134648                                     | 78898.15206                                      | 1756.121853                                 |
| 0.617563739                      | 0.005972292                                     | 9206.933486                                      | 1778.885321                                 |
| 0.515655577                      | 0.039975685                                     | 2992.779886                                      | 351.1935484                                 |
| 0.399266504                      | 0.244035181                                     | 48227.91978                                      | 520.1255358                                 |
| 0.417154668                      | 0.1422287                                       | 214593.1107                                      | 1337.912469                                 |
| 0.739130435                      | 0.008135469                                     | 4146.823529                                      | 1842.058824                                 |
| 0.487664474                      | 0.020752584                                     | 16918.09781                                      | 1028.310287                                 |
| 0.74796748                       | 0.021199732                                     | 1676.304348                                      | 668.173913                                  |
| 0.548812665                      | 0.02687462                                      | 2701.485577                                      | 456.6778846                                 |
| 0.527881041                      | 0.016121456                                     | 16762.68779                                      | 1230.225352                                 |



| wavelet.HLL_glszm_SmallAreaEmphasis | wavelet.HLL_glszm_LowGrayLevelZoneEmphasis | wavelet.HLL_glszm_ZoneEntropy | wavelet.HLL_glszm_SmallAreaLowGrayLevelEmphasis | wavelet.HLL_ngtdm_Coarseness |
|-------------------------------------|--------------------------------------------|-------------------------------|-------------------------------------------------|------------------------------|
| 0.795008647                         | 0.005154414                                | 6.172713284                   | 0.004766574                                     | 0.000897233                  |
| 0.70045969                          | 0.003011907                                | 6.412154835                   | 0.00260732                                      | 0.00387781                   |
| 0.731332134                         | 0.010548494                                | 5.822606929                   | 0.009414452                                     | 0.01422022                   |
| 0.758810139                         | 0.001306781                                | 6.654475118                   | 0.001163814                                     | 0.002668055                  |
| 0.652786345                         | 0.009052806                                | 5.938077452                   | 0.008259158                                     | 0.018061853                  |
| 0.723876675                         | 0.005829797                                | 6.106854808                   | 0.005224718                                     | 0.009846961                  |
| 0.704620022                         | 0.018264534                                | 5.375033738                   | 0.017239402                                     | 0.017747536                  |
| 0.691148768                         | 0.008894732                                | 6.167746891                   | 0.007498629                                     | 0.006765943                  |
| 0.73948291                          | 0.001616914                                | 6.580929643                   | 0.001430948                                     | 0.003691956                  |
| 0.699170572                         | 0.002234772                                | 6.216998486                   | 0.001800069                                     | 0.002232938                  |
| 0.695561176                         | 0.011522309                                | 5.763848252                   | 0.00954973                                      | 0.007845061                  |
| 0.749786                            | 0.00262242                                 | 6.40053442                    | 0.002330019                                     | 0.004925527                  |
| 0.664250056                         | 0.002109678                                | 6.332445362                   | 0.001837489                                     | 0.003497159                  |
| 0.707830766                         | 0.005081556                                | 6.435356214                   | 0.004382712                                     | 0.006227428                  |
| 0.718694157                         | 0.003005761                                | 6.220448934                   | 0.002738908                                     | 0.007338245                  |
| 0.712755934                         | 0.000828495                                | 6.578313711                   | 0.00071975                                      | 0.001120844                  |
| 0.753719856                         | 0.005252046                                | 6.088328516                   | 0.004757582                                     | 0.011202803                  |
| 0.689316129                         | 0.004095332                                | 6.317879241                   | 0.003228431                                     | 0.003308961                  |
| 0.718303747                         | 0.003443279                                | 6.454520526                   | 0.001394239                                     | 0.011960389                  |
| 0.655750139                         | 0.009810925                                | 6.185132758                   | 0.008004516                                     | 0.00274335                   |
| 0.7437656                           | 0.001458118                                | 6.537965078                   | 0.001219831                                     | 0.00145952                   |
| 0.671926882                         | 0.009221025                                | 6.195237016                   | 0.007307698                                     | 0.003781375                  |
| 0.753779079                         | 0.001321085                                | 6.572182102                   | 0.001202016                                     | 0.002706066                  |
| 0.711900988                         | 0.006496654                                | 6.04184851                    | 0.00588536                                      | 0.013625255                  |
| 0.702108205                         | 0.006245436                                | 5.969454976                   | 0.0051546                                       | 0.005467103                  |
| 0.720184726                         | 0.005289769                                | 5.90649866                    | 0.004783529                                     | 0.010381115                  |
| 0.685672759                         | 0.002041544                                | 6.347882554                   | 0.001647897                                     | 0.002083802                  |
| 0.713639619                         | 0.003263322                                | 6.108262983                   | 0.002823068                                     | 0.004937497                  |
| 0.720395233                         | 0.005495614                                | 6.247471228                   | 0.003669702                                     | 0.003651335                  |
| 0.738032216                         | 0.002909741                                | 6.488740806                   | 0.002489463                                     | 0.003149664                  |
| 0.688710137                         | 0.005284206                                | 6.262131252                   | 0.004121223                                     | 0.002260458                  |
| 0.655870811                         | 0.005014887                                | 6.251423151                   | 0.0035959                                       | 0.001284026                  |
| 0.756543313                         | 0.001702017                                | 6.683080525                   | 0.00150067                                      | 0.003446463                  |
| 0.790387427                         | 0.018296938                                | 5.181880803                   | 0.017346763                                     | 0.05206765                   |
| 0.779289623                         | 0.007009553                                | 5.777979159                   | 0.006670088                                     | 0.019308268                  |
| 0.705642031                         | 0.004778661                                | 6.510626514                   | 0.003909163                                     | 0.003508213                  |
| 0.702368785                         | 0.008091226                                | 6.362490976                   | 0.006569886                                     | 0.002523565                  |
| 0.731171723                         | 0.002273255                                | 6.454942712                   | 0.001936326                                     | 0.002205557                  |
| 0.681371789                         | 0.009853877                                | 5.835873898                   | 0.008386928                                     | 0.007874766                  |
| 0.73688765                          | 0.004234529                                | 6.458361086                   | 0.003781096                                     | 0.006358525                  |
| 0.727982846                         | 0.005500945                                | 6.004282712                   | 0.004676347                                     | 0.004738636                  |
| 0.729227509                         | 0.003322932                                | 6.447938338                   | 0.003048759                                     | 0.007356647                  |
| 0.694208291                         | 0.00289287                                 | 6.484262047                   | 0.002493285                                     | 0.004401226                  |
| 0.707127207                         | 0.005170816                                | 6.231686533                   | 0.004479976                                     | 0.006773129                  |
| 0.687657426                         | 0.009398115                                | 6.254791323                   | 0.003168599                                     | 0.003504355                  |
| 0.738443928                         | 0.003568897                                | 6.401355970                   | 0.002876479                                     | 0.003181879                  |
| 0.763272854                         | 0.0017881                                  | 6.70562418                    | 0.001509255                                     | 0.001695019                  |
| 0.734111209                         | 0.010265491                                | 5.952000787                   | 0.009150927                                     | 0.011548615                  |
| 0.808415033                         | 0.01187668                                 | 5.926943969                   | 0.011270815                                     | 0.036844028                  |
| 0.732578801                         | 0.009491031                                | 5.598800293                   | 0.008341804                                     | 0.012274771                  |
| 0.70896835                          | 0.002992224                                | 6.568329399                   | 0.002468891                                     | 0.002146813                  |
| 0.682276051                         | 0.008570053                                | 6.17737436                    | 0.007226613                                     | 0.00871544                   |
| 0.690892777                         | 0.003386687                                | 6.42145843                    | 0.002708169                                     | 0.001859712                  |
| 0.657348069                         | 0.010575103                                | 5.941982796                   | 0.008007365                                     | 0.010588146                  |
| 0.712128136                         | 0.001017564                                | 6.646148782                   | 0.000880689                                     | 0.001198326                  |
| 0.76695513                          | 0.003964873                                | 6.573090427                   | 0.00352813                                      | 0.007677076                  |
| 0.690972598                         | 0.002017947                                | 6.597763561                   | 0.00177814                                      | 0.003509449                  |
| 0.699739244                         | 0.004513854                                | 6.088649726                   | 0.003788518                                     | 0.005372459                  |
| 0.804755585                         | 0.007065187                                | 6.25431041                    | 0.006713733                                     | 0.008565515                  |
| 0.711750685                         | 0.007482063                                | 5.952392437                   | 0.0064764                                       | 0.008213178                  |
| 0.747285238                         | 0.001825466                                | 6.61083139                    | 0.001641723                                     | 0.003380861                  |
| 0.714511111                         | 0.002412523                                | 6.292165066                   | 0.001890029                                     | 0.001269453                  |
| 0.698507224                         | 0.003932051                                | 6.255873937                   | 0.003125487                                     | 0.002553091                  |
| 0.714483358                         | 0.002708617                                | 6.571767605                   | 0.002394772                                     | 0.002777082                  |
| 0.764987042                         | 0.014985928                                | 5.570474603                   | 0.007675849                                     | 0.029055992                  |
| 0.746479087                         | 0.002512866                                | 6.436574615                   | 0.002310727                                     | 0.004953318                  |
| 0.752774678                         | 0.006190489                                | 5.648918867                   | 0.005745596                                     | 0.015401346                  |
| 0.726351888                         | 0.001181515                                | 6.634643372                   | 0.001035572                                     | 0.002436689                  |
| 0.73246497                          | 0.007212181                                | 6.052769388                   | 0.006576437                                     | 0.014101917                  |
| 0.698038265                         | 0.003315322                                | 6.257024267                   | 0.002696967                                     | 0.003552103                  |
| 0.713753949                         | 0.001899973                                | 6.561683893                   | 0.001662827                                     | 0.002425496                  |
| 0.693904056                         | 0.004442871                                | 6.341644909                   | 0.002403658                                     | 0.006278685                  |
| 0.741356576                         | 0.001262542                                | 6.681497119                   | 0.001096942                                     | 0.001431411                  |
| 0.719325882                         | 0.001714143                                | 6.639055684                   | 0.00139644                                      | 0.001214297                  |
| 0.700930133                         | 0.001661964                                | 6.286691745                   | 0.001265237                                     | 0.000796266                  |
| 0.770687789                         | 0.00294399                                 | 6.590398709                   | 0.002619627                                     | 0.006461268                  |
| 0.690378719                         | 0.00979006                                 | 6.156289949                   | 0.008270614                                     | 0.005926112                  |
| 0.701332499                         | 0.009908872                                | 5.899362707                   | 0.005518988                                     | 0.011140562                  |
| 0.694195342                         | 0.004996568                                | 6.189515956                   | 0.004094059                                     | 0.004005466                  |
| 0.686305803                         | 0.006039902                                | 6.325782883                   | 0.004942161                                     | 0.002470808                  |
| 0.763159439                         | 0.005563551                                | 6.292028906                   | 0.005288896                                     | 0.01396889                   |
| 0.802187061                         | 0.002106754                                | 6.569842089                   | 0.001948944                                     | 0.004984153                  |
| 0.754521552                         | 0.001639475                                | 6.333164862                   | 0.001401367                                     | 0.00247104                   |
| 0.660611098                         | 0.036855804                                | 5.476490797                   | 0.033339235                                     | 0.038357729                  |
| 0.7136105                           | 0.002926356                                | 6.490680933                   | 0.002384568                                     | 0.002169107                  |
| 0.684360899                         | 0.003721487                                | 6.305846707                   | 0.002891127                                     | 0.001307577                  |
| 0.771372729                         | 0.004373723                                | 6.369967387                   | 0.004059574                                     | 0.00880906                   |
| 0.689498594                         | 0.003252212                                | 6.32495476                    | 0.00267189                                      | 0.00456743                   |
| 0.767172196                         | 0.020567544                                | 5.447520195                   | 0.019316114                                     | 0.033150044                  |
| 0.847556894                         | 0.016895313                                | 5.317516088                   | 0.016669608                                     | 0.045846403                  |
| 0.728954976                         | 0.001310662                                | 6.657259519                   | 0.001137786                                     | 0.001908266                  |
| 0.7598857                           | 0.003025369                                | 6.326067871                   | 0.002856087                                     | 0.009521901                  |
| 0.715213025                         | 0.011497492                                | 6.175052253                   | 0.01038898                                      | 0.006651008                  |
| 0.698112401                         | 0.003718194                                | 6.414204927                   | 0.002925008                                     | 0.001935419                  |
| 0.721717454                         | 0.00137584                                 | 6.561464146                   | 0.00113092                                      | 0.00133879                   |
| 0.821617647                         | 0.006721842                                | 6.15584418                    | 0.006506156                                     | 0.02285031                   |
| 0.711608975                         | 0.003130426                                | 6.305490881                   | 0.002815926                                     | 0.005762522                  |
| 0.81665157                          | 0.018998946                                | 5.418684342                   | 0.018661517                                     | 0.036838061                  |
| 0.676965775                         | 0.009430341                                | 6.001877553                   | 0.00821076                                      | 0.016415367                  |
| 0.778025222                         | 0.004019328                                | 6.443090346                   | 0.003749774                                     | 0.01026093                   |

| wavelet_HLL_ngtdm_Complexity | wavelet_HLL_ngtdm_Strength | wavelet_HLL_ngtdm_Busyness | wavelet_HLL_ngtdm_Contrast | wavelet_LLH_gldm_GrayLevelVariance | wavelet_LLH_gldm_HighGrayLevelEmphasis |
|------------------------------|----------------------------|----------------------------|----------------------------|------------------------------------|----------------------------------------|
| 8.146779608                  | 7.032782985                | 0.073258442                | 0.000497835                | 36.43842941                        | 338.3413598                            |
| 1.651651088                  | 3.43811523                 | 0.132232408                | 4.62E-05                   | 86.41781123                        | 947.5873857                            |
| 3.199218514                  | 3.840451097                | 0.148057218                | 0.000620353                | 405.9542781                        | 2199.105991                            |
| 3.95616784                   | 3.791208386                | 0.109421675                | 8.98E-05                   | 54.12605727                        | 934.8527514                            |
| 5.229873397                  | 9.429311443                | 0.054138959                | 0.00051602                 | 66.72837734                        | 764.7771588                            |
| 4.328411598                  | 4.53605148                 | 0.111308466                | 0.000391895                | 72.18725889                        | 1030.104199                            |
| 1.76811095                   | 3.565409737                | 0.119650607                | 0.000414468                | 284.3553963                        | 3993.418398                            |
| 1.601866201                  | 2.08234577                 | 0.251147508                | 0.000233107                | 200.5311742                        | 1628.873253                            |
| 4.177160704                  | 4.892616714                | 0.084242518                | 9.38E-05                   | 69.04716141                        | 1057.225589                            |
| 0.733128384                  | 1.211742253                | 0.329889882                | 3.27E-05                   | 498.4753832                        | 3518.151711                            |
| 1.051513976                  | 1.666897557                | 0.29755513                 | 0.000164517                | 439.748468                         | 2552.523579                            |
| 4.163364162                  | 5.000287136                | 0.091017505                | 0.00011041                 | 93.96794462                        | 1654.377868                            |
| 0.953042921                  | 2.220722255                | 0.159155134                | 4.04E-05                   | 127.1713049                        | 1827.679846                            |
| 3.875662111                  | 4.48539899                 | 0.130552799                | 0.000207945                | 57.78227556                        | 582.7987478                            |
| 4.113403011                  | 5.202111087                | 0.076521083                | 0.000218035                | 55.80309451                        | 580.6706915                            |
| 0.655272249                  | 2.16319077                 | 0.182510492                | 6.84E-06                   | 12.55265609                        | 668.9802793                            |
| 4.218816834                  | 7.495720516                | 0.068445384                | 0.000221291                | 73.42238569                        | 1014.452722                            |
| 0.682666267                  | 1.583703606                | 0.316624493                | 4.14E-05                   | 46.7358349                         | 820.9927101                            |
| 24.07335157                  | 17.6135341                 | 0.030287463                | 0.000930626                | 51.99927079                        | 564.1426117                            |
| 0.262140454                  | 0.668407141                | 0.658780265                | 2.76E-05                   | 239.5571253                        | 1994.661549                            |
| 1.309520172                  | 2.246969097                | 0.21547388                 | 1.71E-05                   | 27.51461592                        | 520.3053216                            |
| 0.807731652                  | 1.155217613                | 0.43621786                 | 8.46E-05                   | 320.1204367                        | 2976.563953                            |
| 4.23650605                   | 5.010761848                | 0.085114619                | 5.55E-05                   | 16.55681536                        | 226.0058587                            |
| 5.203453132                  | 6.23355229                 | 0.073653129                | 0.000517649                | 330.7985097                        | 1958.191268                            |
| 1.260782056                  | 2.204742795                | 0.241638897                | 8.57E-05                   | 226.3468691                        | 1602.547342                            |
| 2.402449831                  | 4.268016241                | 0.096556108                | 0.000223298                | 213.9351627                        | 1762.028818                            |
| 0.641458978                  | 1.221301381                | 0.312860801                | 2.60E-05                   | 726.4194784                        | 4784.469706                            |
| 1.437635691                  | 2.761688563                | 0.156608937                | 7.18E-05                   | 822.5344056                        | 7037.430565                            |
| 1.583010951                  | 1.93158585                 | 0.343342861                | 0.000116203                | 747.0273338                        | 2601.732578                            |
| 1.784514027                  | 2.958633529                | 0.163274049                | 4.95E-05                   | 73.94409715                        | 1606.657356                            |
| 0.532051521                  | 0.938743061                | 0.543054685                | 3.28E-05                   | 830.2132851                        | 7819.415225                            |
| 0.176790509                  | 0.542334999                | 0.986403099                | 8.44E-06                   | 97.36235746                        | 1428.369309                            |
| 4.92788634                   | 4.275183614                | 0.101210202                | 0.000131738                | 78.74570037                        | 1703.553369                            |
| 12.85458488                  | 13.1558237                 | 0.050912557                | 0.005456331                | 126.4902922                        | 1149.875                               |
| 8.271335496                  | 9.819734711                | 0.049386802                | 0.00093681                 | 171.5664374                        | 1830.165663                            |
| 2.229396774                  | 3.077329605                | 0.212263615                | 7.97E-05                   | 61.85561489                        | 929.2747525                            |
| 0.765380939                  | 1.366477429                | 0.431333361                | 3.90E-05                   | 463.4703627                        | 4673.677778                            |
| 1.617767826                  | 1.972578527                | 0.221848071                | 4.60E-05                   | 70.3672081                         | 1738.385808                            |
| 1.049336733                  | 2.028248983                | 0.235265042                | 0.000120248                | 249.2367657                        | 4030.529341                            |
| 6.255094717                  | 6.681163225                | 0.079813376                | 0.000204887                | 89.15497714                        | 976.0476644                            |
| 1.224608983                  | 1.976414831                | 0.234760844                | 7.46E-05                   | 108.1594642                        | 1575.246947                            |
| 5.464223599                  | 5.894970306                | 0.07358349                 | 0.000279107                | 66.66368644                        | 944.0167891                            |
| 2.640869553                  | 3.891567008                | 0.120116146                | 8.11E-05                   | 67.6872286                         | 943.40743                              |
| 2.174619726                  | 3.251095917                | 0.14563771                 | 0.000174183                | 157.948168                         | 1316.204878                            |
| 1.084046188                  | 1.55155528                 | 0.288793403                | 7.09E-05                   | 160.4827902                        | 1609.545793                            |
| 2.012927575                  | 2.195427364                | 0.235780953                | 0.000100082                | 48.42762418                        | 918.0412926                            |
| 2.804940602                  | 2.795576358                | 0.1938203                  | 4.41E-05                   | 52.84194238                        | 1040.917018                            |
| 3.588304269                  | 4.637419431                | 0.11450233                 | 0.000324806                | 267.3368364                        | 2345.476844                            |
| 81.64550901                  | 50.78947512                | 0.0227213                  | 0.012379774                | 36.98891735                        | 348.4850746                            |
| 1.930825576                  | 2.727618676                | 0.168056657                | 0.00038037                 | 642.5252764                        | 4580.150905                            |
| 1.518591994                  | 2.129375398                | 0.239100107                | 3.63E-05                   | 47.17368048                        | 946.5955023                            |
| 1.708834277                  | 2.819764192                | 0.185978231                | 0.000220688                | 237.1870911                        | 1414.996372                            |
| 0.823449209                  | 1.276955263                | 0.39159142                 | 2.79E-05                   | 641.0293351                        | 4157.572102                            |
| 1.742273763                  | 2.929508269                | 0.187250529                | 0.000269382                | 182.6945353                        | 2158.805415                            |
| 1.018850529                  | 3.070880546                | 0.168244369                | 7.71E-06                   | 32.41923745                        | 1034.685277                            |
| 13.29544608                  | 10.04984959                | 0.054437428                | 0.000433512                | 133.6582553                        | 1426.792947                            |
| 2.836886143                  | 5.058603835                | 0.091166226                | 4.32E-05                   | 88.53434206                        | 1657.134975                            |
| 1.405715264                  | 2.293520572                | 0.182600829                | 9.57E-05                   | 1031.695438                        | 10481.39985                            |
| 5.947177267                  | 5.938505378                | 0.081005073                | 0.00039838                 | 45.70528648                        | 612.5429975                            |
| 1.69620519                   | 2.888560553                | 0.155700806                | 0.000145424                | 40.45280554                        | 324.3427923                            |
| 4.116518762                  | 4.833919441                | 0.097779013                | 8.87E-05                   | 45.36730554                        | 525.4714488                            |
| 0.629920996                  | 1.001319558                | 0.481116676                | 1.50E-05                   | 322.3663206                        | 5925.345199                            |
| 0.586969051                  | 1.307667606                | 0.355785763                | 2.59E-05                   | 132.303671                         | 2581.848867                            |
| 1.398659139                  | 3.534762023                | 0.142770691                | 2.78E-05                   | 47.81655058                        | 1811.785793                            |
| 7.820398457                  | 9.796001667                | 0.067231455                | 0.001624888                | 41.96415299                        | 347.8110599                            |
| 3.98624356                   | 5.479588205                | 0.073200315                | 9.67E-05                   | 60.06582777                        | 990.5318738                            |
| 4.451481321                  | 5.332094597                | 0.084496563                | 0.000792401                | 477.4845848                        | 2862.840102                            |
| 1.589373835                  | 2.453125737                | 0.14084275                 | 4.97E-05                   | 94.29160705                        | 1252.90929                             |
| 6.870870271                  | 6.594976628                | 0.074512675                | 0.000789118                | 71.74701381                        | 753.706278                             |
| 1.128274121                  | 1.7918807                  | 0.24601375                 | 6.29E-05                   | 313.5956298                        | 2610.440577                            |
| 1.856597633                  | 3.855200007                | 0.130039334                | 2.53E-05                   | 59.58362178                        | 729.2865132                            |
| 2.537591372                  | 4.11218185                 | 0.122716305                | 0.000128991                | 81.93409438                        | 765.6014172                            |
| 1.757209693                  | 3.549133719                | 0.148431844                | 1.44E-05                   | 27.87106953                        | 562.4756192                            |
| 0.913288702                  | 2.00436396                 | 0.278497737                | 1.06E-05                   | 29.25789681                        | 1098.604378                            |
| 0.300286132                  | 0.611516217                | 0.705480893                | 7.43E-06                   | 158.3293396                        | 3039.083551                            |
| 8.314379887                  | 7.410618412                | 0.07718473                 | 0.000333554                | 146.8041392                        | 1893.684588                            |
| 1.610811077                  | 2.251516133                | 0.240208599                | 0.000138684                | 289.9020317                        | 2106.554163                            |
| 2.470567077                  | 3.744210452                | 0.14672509                 | 0.000273026                | 151.2983741                        | 971.0409836                            |
| 1.012693835                  | 1.830086603                | 0.268354193                | 5.47E-05                   | 224.0126423                        | 2476.548186                            |
| 0.755071169                  | 1.240612157                | 0.46672253                 | 4.38E-05                   | 492.9298317                        | 4492.847857                            |
| 13.84337952                  | 13.07504259                | 0.034809757                | 0.000653211                | 119.1428532                        | 1690.541667                            |
| 11.79547946                  | 7.620321157                | 0.066776976                | 0.000304914                | 131.0412422                        | 1685.611484                            |
| 1.712871243                  | 1.902485693                | 0.205226645                | 6.54E-05                   | 323.8034169                        | 2974.24606                             |
| 7.937206824                  | 11.36033077                | 0.056828066                | 0.002362604                | 47.7737931                         | 540.6137931                            |
| 1.5435239                    | 2.492912606                | 0.264831275                | 3.60E-05                   | 27.15199349                        | 463.5688587                            |
| 0.387286128                  | 0.915585093                | 0.647804613                | 1.07E-05                   | 454.9365096                        | 6405.948868                            |
| 8.947747906                  | 9.357168166                | 0.067796863                | 0.000407965                | 53.16782866                        | 423.4087404                            |
| 1.35412163                   | 1.936636748                | 0.237882623                | 0.00014549                 | 723.8420197                        | 3426.702964                            |
| 8.247183699                  | 8.827300754                | 0.067129832                | 0.002260186                | 28.47370778                        | 324.7650273                            |
| 27.47250745                  | 20.60173829                | 0.025303341                | 0.006449381                | 52.4707483                         | 691.8380952                            |
| 2.032840317                  | 3.02003161                 | 0.145070264                | 3.14E-05                   | 72.43098207                        | 1495.324277                            |
| 9.571056083                  | 9.125651653                | 0.050360089                | 0.000520613                | 173.7489607                        | 1844.890935                            |
| 2.007301422                  | 2.533290753                | 0.217554487                | 0.000196425                | 286.4570343                        | 2107.875734                            |
| 0.535480555                  | 1.078934754                | 0.45673654                 | 2.38E-05                   | 64.7508038                         | 1260.033496                            |
| 0.974668033                  | 1.913065774                | 0.247733212                | 1.30E-05                   | 52.6499923                         | 384.6572511                            |
| 42.29723132                  | 24.97250537                | 0.024072626                | 0.003733434                | 40.12607602                        | 348.9407115                            |
| 3.876816213                  | 5.768005835                | 0.077831066                | 9.29E-05                   | 193.4783959                        | 1806.333059                            |
| 28.57633533                  | 20.75358206                | 0.030162041                | 0.005871616                | 76.16669972                        | 674.2276423                            |
| 5.519211968                  | 6.647881528                | 0.087722161                | 0.00080276                 | 21.55454223                        | 281.5382586                            |
| 8.94069182                   | 11.96783992                | 0.039365844                | 0.000264212                | 44.3689188                         | 977.6827757                            |

| wavelet.LLH_gldm_GrayLevelNonUniformityNormalized | wavelet.LLH_gldm_DependenceEntropy | wavelet.LLH_gldm_DependenceNonUniformity | wavelet.LLH_gldm_GrayLevelNonUniformity |
|---------------------------------------------------|------------------------------------|------------------------------------------|-----------------------------------------|
| 0.054305869                                       | 6.499688765                        | 165.0226629                              | 38.33994334                             |
| 0.041432995                                       | 7.270754579                        | 479.5440539                              | 86.05633125                             |
| 0.015598123                                       | 6.913190833                        | 202.6221198                              | 6.769585253                             |
| 0.042700186                                       | 6.750874253                        | 770.2447818                              | 112.5149905                             |
| 0.038679092                                       | 6.446748663                        | 107.8412256                              | 13.88579387                             |
| 0.035426377                                       | 6.63906151                         | 198.6982893                              | 22.77916019                             |
| 0.019943823                                       | 6.800986637                        | 143.4925816                              | 6.721068249                             |
| 0.020995932                                       | 7.137469558                        | 378.6506986                              | 21.03792415                             |
| 0.037983305                                       | 6.810581266                        | 630.2544493                              | 78.96729197                             |
| 0.013561093                                       | 8.047852178                        | 1053.253066                              | 42.01226598                             |
| 0.015003019                                       | 7.474589615                        | 297.3071342                              | 12.40749698                             |
| 0.030929863                                       | 7.094238901                        | 421.5641026                              | 45.83805668                             |
| 0.02683451                                        | 7.107541672                        | 701.997107                               | 55.65477338                             |
| 0.040060036                                       | 6.829869999                        | 296.450805                               | 44.78711986                             |
| 0.039055525                                       | 6.66285374                         | 268.5521405                              | 35.57958288                             |
| 0.14693672                                        | 6.59620827                         | 697.1926011                              | 1020.769397                             |
| 0.033944713                                       | 6.707666149                        | 223.0229226                              | 23.69340974                             |
| 0.047141125                                       | 6.942287673                        | 525.567753                               | 109.9331046                             |
| 0.040882843                                       | 6.535004249                        | 171.6941581                              | 23.79381443                             |
| 0.023553709                                       | 7.816674798                        | 721.2127811                              | 65.97393788                             |
| 0.066723644                                       | 6.703965072                        | 1018.057427                              | 348.5643185                             |
| 0.016234451                                       | 7.590932177                        | 635.8488372                              | 27.92325581                             |
| 0.079415169                                       | 6.63230647                         | 452.178323                               | 216.8828268                             |
| 0.016887029                                       | 7.03702767                         | 204.5218295                              | 8.122661123                             |
| 0.019556903                                       | 7.439212211                        | 404.6877076                              | 23.54651163                             |
| 0.022494166                                       | 7.104667968                        | 253.5619597                              | 15.61095101                             |
| 0.011219034                                       | 8.259930903                        | 1161.388921                              | 38.88517023                             |
| 0.013845217                                       | 7.723231024                        | 560.452896                               | 19.84019539                             |
| 0.013021531                                       | 7.668326635                        | 797.0872521                              | 22.98300283                             |
| 0.051722718                                       | 7.167696349                        | 548.2171518                              | 131.4791503                             |
| 0.010814225                                       | 8.056955574                        | 1266.454545                              | 34.37842089                             |
| 0.031268339                                       | 7.405738415                        | 1553.714334                              | 185.4212479                             |
| 0.037401808                                       | 6.931312794                        | 573.0570585                              | 76.03787506                             |
| 0.03568787                                        | 5.654343684                        | 49.75                                    | 3.711538462                             |
| 0.025112498                                       | 6.549705396                        | 133.373494                               | 8.337349398                             |
| 0.037624743                                       | 6.883490513                        | 570.7960396                              | 76.0019802                              |
| 0.014977575                                       | 7.959601432                        | 991.0395833                              | 43.13541667                             |
| 0.038300818                                       | 6.971633886                        | 958.5336911                              | 128.4609422                             |
| 0.020735057                                       | 7.18489324                         | 287.1341317                              | 17.31377246                             |
| 0.034862745                                       | 6.897419837                        | 314.3784557                              | 36.57102002                             |
| 0.031388942                                       | 7.095481185                        | 433.1994573                              | 46.26729986                             |
| 0.036922118                                       | 6.755237872                        | 281.2056663                              | 35.18677859                             |
| 0.035916213                                       | 6.979067119                        | 442.6930572                              | 58.97442144                             |
| 0.023516478                                       | 7.159720499                        | 345.7902439                              | 24.10439024                             |
| 0.024186222                                       | 7.244550391                        | 654.3546326                              | 45.42172524                             |
| 0.043071855                                       | 6.72653338                         | 623.8456014                              | 95.96409336                             |
| 0.042708194                                       | 6.850200478                        | 1177.157056                              | 182.1931552                             |
| 0.018614901                                       | 7.08734518                         | 225.5283019                              | 10.85248714                             |
| 0.073513032                                       | 5.425590638                        | 39.89552239                              | 9.850746269                             |
| 0.013169561                                       | 7.290435981                        | 237.6358149                              | 6.54527163                              |
| 0.044499827                                       | 6.954438022                        | 834.4433411                              | 152.3674065                             |
| 0.019781293                                       | 7.343259952                        | 262.688029                               | 16.35912938                             |
| 0.011388941                                       | 8.146530704                        | 1422.794295                              | 43.51714211                             |
| 0.023828951                                       | 7.034894133                        | 201.5313029                              | 14.08291032                             |
| 0.084663851                                       | 6.789312826                        | 1070.275793                              | 552.2623026                             |
| 0.025469785                                       | 6.876749637                        | 348.4903299                              | 22.38794084                             |
| 0.033163339                                       | 6.942984921                        | 702.2849977                              | 72.72731418                             |
| 0.011500441                                       | 7.854562969                        | 561.3665893                              | 14.87006961                             |
| 0.046824913                                       | 6.624365918                        | 215                                      | 38.11547912                             |
| 0.045334666                                       | 6.454455949                        | 236.1713961                              | 39.93984109                             |
| 0.045384341                                       | 6.816918013                        | 514.9933931                              | 96.16941954                             |
| 0.017883343                                       | 7.7323216                          | 1976.967506                              | 97.96495071                             |
| 0.030340068                                       | 7.388960584                        | 877.2122977                              | 93.75080906                             |
| 0.063591585                                       | 7.184286939                        | 434.2764555                              | 173.6686196                             |
| 0.047420841                                       | 5.919762282                        | 64.65898618                              | 10.29032258                             |
| 0.040245724                                       | 6.708528704                        | 463.4262717                              | 62.50160979                             |
| 0.01463578                                        | 7.05754014                         | 175.6852792                              | 5.766497462                             |
| 0.035763412                                       | 7.150473526                        | 857.3778542                              | 114.3356272                             |
| 0.035251061                                       | 6.531238033                        | 126.8878924                              | 15.72197309                             |
| 0.019185628                                       | 7.489747481                        | 742.2312282                              | 38.58229736                             |
| 0.039176766                                       | 6.925042527                        | 824.1434211                              | 119.0973684                             |
| 0.034474805                                       | 6.855818389                        | 346.5943313                              | 38.92205492                             |
| 0.067134453                                       | 6.81638526                         | 962.493808                               | 346.9508514                             |
| 0.072519609                                       | 6.80344898                         | 1202.28916                               | 487.0416915                             |
| 0.028535013                                       | 7.609821983                        | 2432.379085                              | 261.9514161                             |
| 0.024126103                                       | 6.927466359                        | 445.7419355                              | 26.92473118                             |
| 0.017388147                                       | 7.310449826                        | 457.1486124                              | 19.42256043                             |
| 0.024009675                                       | 6.929832193                        | 213.6229508                              | 14.64590164                             |
| 0.020486577                                       | 7.399985988                        | 617.2018141                              | 36.138322                               |
| 0.015246954                                       | 7.946716237                        | 965.2691497                              | 43.39283204                             |
| 0.027273873                                       | 6.763083591                        | 175.2301587                              | 13.74603175                             |
| 0.026463606                                       | 6.988439159                        | 496.0529456                              | 35.48769575                             |
| 0.018152047                                       | 7.586508715                        | 1023.315903                              | 50.68051576                             |
| 0.056171225                                       | 5.811786356                        | 42.68275862                              | 8.144827586                             |
| 0.06270758                                        | 6.656589092                        | 708.1341787                              | 212.6414037                             |
| 0.014305401                                       | 8.207379772                        | 1679.233747                              | 78.33637692                             |
| 0.040480171                                       | 6.519476718                        | 238.8920308                              | 31.49357326                             |
| 0.011803028                                       | 7.748034881                        | 673.3814433                              | 18.31829897                             |
| 0.059452357                                       | 5.81516642                         | 48.91256831                              | 10.87978142                             |
| 0.055238095                                       | 5.318974151                        | 38.1047619                               | 5.8                                     |
| 0.048524979                                       | 7.242316086                        | 854.7660377                              | 192.8867925                             |
| 0.02194063                                        | 7.021934626                        | 258.3569405                              | 15.49008499                             |
| 0.018307605                                       | 7.320769083                        | 377.9608611                              | 18.71037182                             |
| 0.04042874                                        | 7.176228665                        | 963.8630807                              | 165.3535452                             |
| 0.046728004                                       | 6.994118829                        | 1332.8567                                | 271.3027902                             |
| 0.051289662                                       | 6.146882019                        | 69.38735178                              | 12.97628458                             |
| 0.020755335                                       | 7.317153461                        | 407.2401316                              | 25.23848684                             |
| 0.044880693                                       | 5.807158892                        | 41.89430894                              | 5.520325203                             |
| 0.068093372                                       | 6.045794533                        | 93.60686016                              | 25.80738786                             |
| 0.061891842                                       | 6.666816157                        | 151.8698885                              | 49.94671623                             |

| wavelet.LLH_gldm_SmallDependenceEmphasis | wavelet.LLH_gldm_DependenceNonUniformityNormalized | wavelet.LLH_gldm_DependenceVariance | wavelet.LLH_gldm_LargeDependenceEmphasis |
|------------------------------------------|----------------------------------------------------|-------------------------------------|------------------------------------------|
| 0.394731362                              | 0.233743149                                        | 2.244284121                         | 8.529745042                              |
| 0.44712402                               | 0.23088303                                         | 6.092954242                         | 13.94752046                              |
| 0.697844982                              | 0.466871244                                        | 0.549491389                         | 2.820276498                              |
| 0.515389489                              | 0.29231301                                         | 1.897593121                         | 6.370777989                              |
| 0.51278861                               | 0.300393386                                        | 1.355234674                         | 5.501392758                              |
| 0.518173574                              | 0.309017557                                        | 1.217533481                         | 5.161741835                              |
| 0.662484339                              | 0.425794011                                        | 0.71368067                          | 3.290801187                              |
| 0.599532324                              | 0.377894909                                        | 0.729762033                         | 3.662674651                              |
| 0.498777323                              | 0.303152693                                        | 1.127823738                         | 5.172198172                              |
| 0.558407259                              | 0.339978395                                        | 1.061610794                         | 4.528082634                              |
| 0.588469031                              | 0.359500767                                        | 0.940711682                         | 4.139056832                              |
| 0.490465382                              | 0.28445621                                         | 1.461137792                         | 5.921727395                              |
| 0.557849968                              | 0.338474979                                        | 0.99753573                          | 4.454194793                              |
| 0.445189857                              | 0.265161722                                        | 1.703818792                         | 6.776386404                              |
| 0.497735614                              | 0.294788299                                        | 1.247834432                         | 5.447859495                              |
| 0.210675913                              | 0.100358803                                        | 13.87342127                         | 39.89707788                              |
| 0.51588666                               | 0.319517081                                        | 0.96375235                          | 4.693409742                              |
| 0.388967713                              | 0.225372107                                        | 2.702896387                         | 9.397941681                              |
| 0.461329453                              | 0.295007144                                        | 1.22030916                          | 5.628865979                              |
| 0.464337659                              | 0.257484035                                        | 4.98891366                          | 11.51410211                              |
| 0.379833177                              | 0.194880825                                        | 5.090575451                         | 14.01493109                              |
| 0.606229036                              | 0.369679557                                        | 0.959457815                         | 4.062790698                              |
| 0.263309221                              | 0.165572436                                        | 4.258145456                         | 15.67813988                              |
| 0.663815546                              | 0.425201309                                        | 0.680157849                         | 3.249480249                              |
| 0.564983556                              | 0.336119359                                        | 1.394816282                         | 5.063122924                              |
| 0.589044776                              | 0.365363054                                        | 0.943708527                         | 4.095100865                              |
| 0.563325611                              | 0.335080473                                        | 1.256955624                         | 4.852279284                              |
| 0.626573131                              | 0.391104603                                        | 0.913687875                         | 3.824842987                              |
| 0.679015266                              | 0.451607508                                        | 0.535834169                         | 2.874220963                              |
| 0.437870318                              | 0.21566371                                         | 7.140833989                         | 16.14083399                              |
| 0.629187463                              | 0.398381424                                        | 0.74075872                          | 3.510852469                              |
| 0.473959499                              | 0.262009163                                        | 3.159928224                         | 8.789544688                              |
| 0.485688229                              | 0.28187755                                         | 1.562573175                         | 6.130349238                              |
| 0.717248932                              | 0.478365385                                        | 0.974852071                         | 3.461538462                              |
| 0.63872741                               | 0.401727391                                        | 0.817934388                         | 3.602409639                              |
| 0.490034435                              | 0.282572297                                        | 1.436085678                         | 5.912871287                              |
| 0.569406947                              | 0.344110966                                        | 1.108390721                         | 4.54375                                  |
| 0.506523281                              | 0.28578822                                         | 1.852846164                         | 6.440667859                              |
| 0.564512465                              | 0.343873212                                        | 1.148229051                         | 4.643113772                              |
| 0.493818369                              | 0.299693475                                        | 1.330902098                         | 5.543374643                              |
| 0.511828147                              | 0.293893797                                        | 1.573882162                         | 5.911804613                              |
| 0.494249874                              | 0.295074151                                        | 1.251071064                         | 5.467995803                              |
| 0.465453713                              | 0.269606003                                        | 1.643876263                         | 6.504263094                              |
| 0.547050678                              | 0.337356336                                        | 0.925353956                         | 4.379512195                              |
| 0.568116121                              | 0.348431647                                        | 0.99688677                          | 4.348242812                              |
| 0.47638577                               | 0.280002514                                        | 1.938431711                         | 6.728007181                              |
| 0.481380122                              | 0.2759393                                          | 2.120692425                         | 7.050632911                              |
| 0.618109872                              | 0.386840998                                        | 0.831636211                         | 3.744425386                              |
| 0.468968635                              | 0.297727779                                        | 1.392069503                         | 5.820895522                              |
| 0.711572211                              | 0.478140473                                        | 0.716435434                         | 3.024144869                              |
| 0.406586515                              | 0.243704247                                        | 3.484212595                         | 9.946261682                              |
| 0.50290976                               | 0.317639697                                        | 1.117855801                         | 5.016928658                              |
| 0.608252117                              | 0.372361763                                        | 1.114284816                         | 4.26930123                               |
| 0.557905842                              | 0.341000512                                        | 0.984090174                         | 4.404399323                              |
| 0.330784591                              | 0.164077233                                        | 6.032984478                         | 17.39245746                              |
| 0.627291094                              | 0.396462264                                        | 0.83554458                          | 3.666666667                              |
| 0.535575194                              | 0.320239397                                        | 1.17872042                          | 4.939808482                              |
| 0.67405345                               | 0.434158228                                        | 0.761237408                         | 3.321732405                              |
| 0.452801357                              | 0.264127764                                        | 3.493006296                         | 9.314496314                              |
| 0.443552466                              | 0.268071959                                        | 1.374560175                         | 6.248581158                              |
| 0.419686065                              | 0.243036051                                        | 2.011901578                         | 7.756960831                              |
| 0.590051553                              | 0.360892206                                        | 1.121917388                         | 4.373493976                              |
| 0.507759014                              | 0.283887475                                        | 2.428298824                         | 7.299676375                              |
| 0.342741975                              | 0.159017377                                        | 9.238281172                         | 22.70779934                              |
| 0.508914491                              | 0.297967678                                        | 1.247807344                         | 5.377880184                              |
| 0.492378473                              | 0.298407129                                        | 1.362001717                         | 5.610431423                              |
| 0.676695572                              | 0.445901724                                        | 0.532814553                         | 2.898477157                              |
| 0.461213658                              | 0.268182                                           | 1.664658443                         | 6.58148264                               |
| 0.456898356                              | 0.284502001                                        | 1.091556235                         | 5.533632287                              |
| 0.593600751                              | 0.369085643                                        | 0.828035066                         | 3.883142715                              |
| 0.47159127                               | 0.27109981                                         | 1.696706631                         | 6.545394737                              |
| 0.51245017                               | 0.306992322                                        | 1.134455898                         | 5.081488043                              |
| 0.342757546                              | 0.186241062                                        | 4.879622396                         | 14.38815789                              |
| 0.334064731                              | 0.179018636                                        | 4.541555799                         | 14.23704586                              |
| 0.469334606                              | 0.264965042                                        | 2.213333143                         | 7.420479303                              |
| 0.627430307                              | 0.399410336                                        | 0.717391863                         | 3.471326165                              |
| 0.643151547                              | 0.409264648                                        | 0.787943149                         | 3.510295434                              |
| 0.55804918                               | 0.350201559                                        | 0.850319807                         | 4.137704918                              |
| 0.563281914                              | 0.34988765                                         | 0.878835208                         | 4.16553288                               |
| 0.567015298                              | 0.339166954                                        | 1.033357219                         | 4.477863668                              |
| 0.561063558                              | 0.347678886                                        | 1.005275258                         | 4.380952381                              |
| 0.602918013                              | 0.369912711                                        | 0.900297562                         | 3.973900075                              |
| 0.591919068                              | 0.366517157                                        | 0.859715848                         | 3.949856734                              |
| 0.468452107                              | 0.294363853                                        | 1.145969084                         | 5.455172414                              |
| 0.376145528                              | 0.208827537                                        | 2.954194412                         | 10.32291359                              |
| 0.521039617                              | 0.30665335                                         | 1.387336253                         | 5.440102264                              |
| 0.503238885                              | 0.307059166                                        | 1.118225494                         | 5.097686375                              |
| 0.662239225                              | 0.433879796                                        | 0.597885004                         | 3.069587629                              |
| 0.472551516                              | 0.267281794                                        | 1.686822539                         | 6.584699454                              |
| 0.579232804                              | 0.362902494                                        | 0.771882086                         | 3.876190476                              |
| 0.411475618                              | 0.215035481                                        | 5.702476706                         | 13.88855346                              |
| 0.597344353                              | 0.365944675                                        | 1.049964288                         | 4.235127479                              |
| 0.59441391                               | 0.369824717                                        | 0.993642794                         | 4.123287671                              |
| 0.41937519                               | 0.235663345                                        | 3.041402431                         | 9.37603912                               |
| 0.40731327                               | 0.229565398                                        | 2.300630597                         | 8.563554943                              |
| 0.458142567                              | 0.274258307                                        | 1.458482401                         | 6.201581028                              |
| 0.550762848                              | 0.334901428                                        | 1.088336976                         | 4.634868421                              |
| 0.576743451                              | 0.340604138                                        | 1.062198427                         | 4.528455285                              |
| 0.396622097                              | 0.2469838                                          | 1.624076691                         | 7.300791557                              |
| 0.378960317                              | 0.188190692                                        | 4.187313915                         | 12.99504337                              |

| wavelet.LLH_gldm_LargeDependenceLowGrayLevelEmphasis | wavelet.LLH_gldm_SmallDependenceHighGrayLevelEmphasis | wavelet.LLH_gldm_LargeDependenceHighGrayLevelEmphasis |
|------------------------------------------------------|-------------------------------------------------------|-------------------------------------------------------|
| 0.038407658                                          | 147.2513287                                           | 2695.151558                                           |
| 0.031448961                                          | 429.8367454                                           | 12295.23784                                           |
| 0.032806167                                          | 1365.798203                                           | 7476                                                  |
| 0.008661067                                          | 486.0169901                                           | 5807.198861                                           |
| 0.012965667                                          | 370.1872423                                           | 4449.311978                                           |
| 0.011521065                                          | 554.1993939                                           | 4968.524106                                           |
| 0.004146204                                          | 2573.362306                                           | 13145.78042                                           |
| 0.005608079                                          | 978.0413517                                           | 5621.90519                                            |
| 0.011470427                                          | 538.1075911                                           | 5290.453102                                           |
| 0.003312624                                          | 2008.183075                                           | 15047.46288                                           |
| 0.01060742                                           | 1506.415187                                           | 9504.122128                                           |
| 0.005037216                                          | 829.3357612                                           | 9745.554656                                           |
| 0.003728902                                          | 1015.108588                                           | 7922.815815                                           |
| 0.025711968                                          | 273.6138699                                           | 3705.070662                                           |
| 0.026759183                                          | 301.37521                                             | 3097.177827                                           |
| 0.062393591                                          | 146.9860921                                           | 25891.72535                                           |
| 0.018237174                                          | 523.0303805                                           | 4813.472779                                           |
| 0.014426042                                          | 333.9116804                                           | 7243.364065                                           |
| 0.018356891                                          | 271.4010043                                           | 3045.063574                                           |
| 0.008909721                                          | 980.4955912                                           | 19833.34202                                           |
| 0.030400626                                          | 205.051634                                            | 7046.332504                                           |
| 0.003293098                                          | 1836.892736                                           | 11611.18605                                           |
| 0.092964871                                          | 67.49348683                                           | 3216.430611                                           |
| 0.007638288                                          | 1424.45334                                            | 5120.523909                                           |
| 0.010112461                                          | 958.3400549                                           | 7474.429402                                           |
| 0.005487276                                          | 1098.010221                                           | 6604.518732                                           |
| 0.005194019                                          | 2790.778664                                           | 20929.40969                                           |
| 0.00417098                                           | 4056.505653                                           | 32218.86532                                           |
| 0.009608287                                          | 1979.509057                                           | 5988.813598                                           |
| 0.010895565                                          | 712.7564664                                           | 26166.97679                                           |
| 0.001087287                                          | 4706.25492                                            | 30011.53287                                           |
| 0.00831805                                           | 695.4746953                                           | 11360.36054                                           |
| 0.004730754                                          | 853.8569292                                           | 9991.259223                                           |
| 0.02388793                                           | 840.816648                                            | 4015.548077                                           |
| 0.007219257                                          | 1131.960499                                           | 6522.21988                                            |
| 0.008710276                                          | 464.932253                                            | 5456.138119                                           |
| 0.002067133                                          | 2741.571862                                           | 20852.99167                                           |
| 0.004478448                                          | 897.8628801                                           | 10982.00239                                           |
| 0.0029778                                            | 2130.711377                                           | 21220.31856                                           |
| 0.009613109                                          | 499.1866762                                           | 4965.904671                                           |
| 0.005315989                                          | 820.4136945                                           | 9552.504749                                           |
| 0.009884954                                          | 467.4156958                                           | 4959.011542                                           |
| 0.011030419                                          | 458.8883027                                           | 5881.317296                                           |
| 0.008633096                                          | 721.2541133                                           | 5807.836098                                           |
| 0.004685248                                          | 925.8238552                                           | 6602.721512                                           |
| 0.009174362                                          | 445.0851545                                           | 5909.714542                                           |
| 0.008133519                                          | 503.41034                                             | 7234.448195                                           |
| 0.004775117                                          | 1349.618213                                           | 9750.61578                                            |
| 0.094296317                                          | 161.912599                                            | 2107.738806                                           |
| 0.005659913                                          | 3180.421318                                           | 14559.37425                                           |
| 0.012290859                                          | 393.0335028                                           | 9156.336741                                           |
| 0.010728644                                          | 662.3447016                                           | 7817.160822                                           |
| 0.0081619                                            | 2529.207416                                           | 17121.37163                                           |
| 0.005054476                                          | 1211.956557                                           | 9140.101523                                           |
| 0.018351664                                          | 354.7094718                                           | 17253.9465                                            |
| 0.005831968                                          | 894.124624                                            | 5257.734926                                           |
| 0.004070232                                          | 891.6776952                                           | 8168.23575                                            |
| 0.001378479                                          | 6648.608341                                           | 38719.77417                                           |
| 0.029038409                                          | 288.1590191                                           | 5578.447174                                           |
| 0.040921883                                          | 157.0167748                                           | 1809.832009                                           |
| 0.020495784                                          | 237.2409339                                           | 3877.203398                                           |
| 0.001083304                                          | 3585.755886                                           | 25253.3284                                            |
| 0.003591708                                          | 1311.532211                                           | 18321.40162                                           |
| 0.013681295                                          | 618.7168403                                           | 39731.40278                                           |
| 0.028356349                                          | 181.6664363                                           | 1971.682028                                           |
| 0.008117534                                          | 503.5963166                                           | 5322.620734                                           |
| 0.007172168                                          | 1914.939315                                           | 8875.667513                                           |
| 0.00935669                                           | 614.035884                                            | 7666.203628                                           |
| 0.014116242                                          | 344.6750598                                           | 4301.535874                                           |
| 0.003052705                                          | 1604.089988                                           | 9597.549478                                           |
| 0.012944576                                          | 357.530861                                            | 4505.831908                                           |
| 0.013268539                                          | 415.7334704                                           | 3658.917626                                           |
| 0.028848403                                          | 197.6669522                                           | 7968.935372                                           |
| 0.013763843                                          | 363.7893143                                           | 15801.67555                                           |
| 0.002986024                                          | 1441.077501                                           | 22902.46089                                           |
| 0.003607336                                          | 1166.237736                                           | 6884.55914                                            |
| 0.005585495                                          | 1410.088591                                           | 6745.435094                                           |
| 0.016442183                                          | 565.3605838                                           | 3767.260656                                           |
| 0.005450593                                          | 1399.203209                                           | 9984.407596                                           |
| 0.002038661                                          | 2742.43893                                            | 18096.51968                                           |
| 0.005879472                                          | 963.8716346                                           | 7263.319444                                           |
| 0.01162544                                           | 1038.288006                                           | 6531.642804                                           |
| 0.003439045                                          | 1815.928653                                           | 11525.25179                                           |
| 0.024440105                                          | 256.6423429                                           | 3033.786207                                           |
| 0.028042383                                          | 180.7166925                                           | 4456.700678                                           |
| 0.001449434                                          | 3280.195644                                           | 35515.04237                                           |
| 0.032859097                                          | 222.2251471                                           | 1972.601542                                           |
| 0.004229465                                          | 2278.245439                                           | 10601.14111                                           |
| 0.033147073                                          | 136.6075408                                           | 2358.021858                                           |
| 0.016826436                                          | 379.9185847                                           | 2756.961905                                           |
| 0.010779867                                          | 631.9821161                                           | 19856.72453                                           |
| 0.005048783                                          | 1106.118996                                           | 8075.36119                                            |
| 0.009995947                                          | 1202.089814                                           | 9569.255382                                           |
| 0.008864779                                          | 548.4780646                                           | 11501.37922                                           |
| 0.012816596                                          | 354.9153007                                           | 6833.164313                                           |
| 0.061819499                                          | 163.8484585                                           | 2040.442688                                           |
| 0.005624191                                          | 972.4561002                                           | 8276.140625                                           |
| 0.019066817                                          | 444.1574097                                           | 2474.504065                                           |
| 0.035893099                                          | 109.2302012                                           | 2105.058047                                           |
| 0.016069669                                          | 369.0853794                                           | 13231.34325                                           |

| wavelet.LLH_gldm_SmallDependenceLowGrayLevelEmphasis | wavelet.LLH_gldm_LowGrayLevelEmphasis | wavelet.LLH_gldm_DistanceZoneVariabilityNormalized | wavelet.LLH_gldm_LowIntensityEmphasis |
|------------------------------------------------------|---------------------------------------|----------------------------------------------------|---------------------------------------|
| 0.004939775                                          | 0.007809927                           | 0.982037404                                        | 0.01144737                            |
| 0.001233012                                          | 0.00336623                            | 0.92243944                                         | 0.003288409                           |
| 0.006146254                                          | 0.010684702                           | 0.838671783                                        | 0.009705044                           |
| 0.001421496                                          | 0.002051909                           | 0.866713582                                        | 0.002593495                           |
| 0.004554042                                          | 0.005421322                           | 0.920138889                                        | 0.007832507                           |
| 0.002581852                                          | 0.003806681                           | 0.898596939                                        | 0.004765801                           |
| 0.003243976                                          | 0.003351425                           | 0.7422208                                          | 0.004407293                           |
| 0.002085196                                          | 0.002530588                           | 0.847627264                                        | 0.003185281                           |
| 0.001763217                                          | 0.003182253                           | 0.939404901                                        | 0.00364191                            |
| 0.000853384                                          | 0.001134672                           | 0.938048                                           | 0.001408947                           |
| 0.003401165                                          | 0.004142881                           | 0.89188217                                         | 0.005257437                           |
| 0.001119403                                          | 0.001508579                           | 0.897508466                                        | 0.002073177                           |
| 0.000994184                                          | 0.001304817                           | 0.931373532                                        | 0.001647663                           |
| 0.002945643                                          | 0.005827227                           | 0.925437012                                        | 0.006868231                           |
| 0.002910893                                          | 0.006206854                           | 0.844606622                                        | 0.006443034                           |
| 0.000525489                                          | 0.001779179                           | 0.912051235                                        | 0.002430734                           |
| 0.002025962                                          | 0.004835989                           | 0.771931124                                        | 0.004782321                           |
| 0.001126016                                          | 0.002068766                           | 0.96148276                                         | 0.002715416                           |
| 0.00331257                                           | 0.004965785                           | 0.88677602                                         | 0.006454363                           |
| 0.000797654                                          | 0.001267776                           | 0.956037765                                        | 0.001612827                           |
| 0.001629742                                          | 0.003045184                           | 0.900151886                                        | 0.004101525                           |
| 0.001219045                                          | 0.001453556                           | 0.805835977                                        | 0.001844671                           |
| 0.002285563                                          | 0.006999294                           | 0.952083718                                        | 0.008498843                           |
| 0.003176124                                          | 0.00373185                            | 0.691609977                                        | 0.004448503                           |
| 0.001831533                                          | 0.002713664                           | 0.856810297                                        | 0.003157288                           |
| 0.002275996                                          | 0.002675676                           | 0.92896702                                         | 0.003543282                           |
| 0.000631491                                          | 0.00131073                            | 0.885369494                                        | 0.001277191                           |
| 0.00219291                                           | 0.002528475                           | 0.913386164                                        | 0.003235367                           |
| 0.002580404                                          | 0.003723518                           | 0.932262492                                        | 0.003816105                           |
| 0.000813312                                          | 0.001219246                           | 0.920322096                                        | 0.001748814                           |
| 0.000510389                                          | 0.000589167                           | 0.94749733                                         | 0.000744116                           |
| 0.00072306                                           | 0.001226029                           | 0.952024233                                        | 0.001457211                           |
| 0.000913638                                          | 0.001268086                           | 0.92147076                                         | 0.001718746                           |
| 0.01175087                                           | 0.0013920163                          | 0.842097241                                        | 0.015974688                           |
| 0.003905947                                          | 0.004299043                           | 0.826053465                                        | 0.005565849                           |
| 0.001360455                                          | 0.00211154                            | 0.893520026                                        | 0.002623362                           |
| 0.000636763                                          | 0.000813585                           | 0.937823549                                        | 0.001039568                           |
| 0.00070692                                           | 0.0010343                             | 0.926256275                                        | 0.001314169                           |
| 0.001586349                                          | 0.001762398                           | 0.815311419                                        | 0.002498877                           |
| 0.002299999                                          | 0.003034487                           | 0.954422222                                        | 0.004226579                           |
| 0.00132175                                           | 0.001716452                           | 0.849629301                                        | 0.002363601                           |
| 0.00238455                                           | 0.003174655                           | 0.913968022                                        | 0.004354126                           |
| 0.001490509                                          | 0.002404831                           | 0.901423859                                        | 0.003001996                           |
| 0.002736554                                          | 0.003465798                           | 0.806446334                                        | 0.004540857                           |
| 0.001203499                                          | 0.00161116                            | 0.865250812                                        | 0.001973394                           |
| 0.001183784                                          | 0.001865196                           | 0.952671894                                        | 0.002321578                           |
| 0.00107285                                           | 0.001664675                           | 0.836955235                                        | 0.002089534                           |
| 0.002492516                                          | 0.002806045                           | 0.907412341                                        | 0.003644889                           |
| 0.010579263                                          | 0.019836577                           | 0.752423823                                        | 0.022835019                           |
| 0.002696688                                          | 0.003239045                           | 0.791463181                                        | 0.003662478                           |
| 0.000938322                                          | 0.001695075                           | 0.94313825                                         | 0.002148022                           |
| 0.002488402                                          | 0.003515228                           | 0.972446325                                        | 0.004513934                           |
| 0.001352973                                          | 0.002270801                           | 0.914011809                                        | 0.002208184                           |
| 0.002355362                                          | 0.002652417                           | 0.897111332                                        | 0.003704601                           |
| 0.000614032                                          | 0.001333007                           | 0.959984675                                        | 0.001779661                           |
| 0.002176248                                          | 0.002642292                           | 0.818204772                                        | 0.00320611                            |
| 0.000970533                                          | 0.001317599                           | 0.713627692                                        | 0.001676609                           |
| 0.000946538                                          | 0.001000682                           | 0.720835503                                        | 0.001292085                           |
| 0.00264363                                           | 0.005727604                           | 0.891428996                                        | 0.006552042                           |
| 0.004241173                                          | 0.008013156                           | 0.957646971                                        | 0.009281278                           |
| 0.001968531                                          | 0.003612789                           | 0.924954195                                        | 0.004485907                           |
| 0.00031017                                           | 0.000397324                           | 0.921322597                                        | 0.000488147                           |
| 0.000626749                                          | 0.000851361                           | 0.955554448                                        | 0.001136515                           |
| 0.000606145                                          | 0.000995914                           | 0.946386748                                        | 0.001644945                           |
| 0.008143207                                          | 0.010612767                           | 0.968757874                                        | 0.014867287                           |
| 0.001378782                                          | 0.002100499                           | 0.908817417                                        | 0.002623712                           |
| 0.004544742                                          | 0.004984338                           | 0.753738772                                        | 0.006146954                           |
| 0.000700175                                          | 0.001750428                           | 0.973461236                                        | 0.001759069                           |
| 0.004020311                                          | 0.00514796                            | 0.937320723                                        | 0.007653144                           |
| 0.001013478                                          | 0.001270492                           | 0.908291331                                        | 0.001566781                           |
| 0.00157766                                           | 0.002677527                           | 0.877077562                                        | 0.003227404                           |
| 0.003411999                                          | 0.004549294                           | 0.950756079                                        | 0.006089282                           |
| 0.001425129                                          | 0.002850577                           | 0.955218952                                        | 0.00395495                            |
| 0.000729101                                          | 0.001389569                           | 0.951545079                                        | 0.00204824                            |
| 0.000342187                                          | 0.000574411                           | 0.954003689                                        | 0.00070131                            |
| 0.001693539                                          | 0.001959721                           | 0.815962186                                        | 0.002477137                           |
| 0.002043906                                          | 0.00248353                            | 0.845848446                                        | 0.002955665                           |
| 0.003752933                                          | 0.005657436                           | 0.908424932                                        | 0.006556655                           |
| 0.001236612                                          | 0.001709628                           | 0.82968048                                         | 0.002053617                           |
| 0.000580422                                          | 0.000748764                           | 0.876495619                                        | 0.000944414                           |
| 0.002495365                                          | 0.002928313                           | 0.805619835                                        | 0.003968253                           |
| 0.001291982                                          | 0.00300987                            | 0.811182378                                        | 0.002570216                           |
| 0.001060142                                          | 0.001387838                           | 0.915984016                                        | 0.001684391                           |
| 0.008936157                                          | 0.011209939                           | 0.750148721                                        | 0.016893052                           |
| 0.001678661                                          | 0.003352655                           | 0.968051036                                        | 0.004266823                           |
| 0.00033661                                           | 0.000450677                           | 0.808592025                                        | 0.00059314                            |
| 0.00393569                                           | 0.008096971                           | 0.937304368                                        | 0.008484746                           |
| 0.001686092                                          | 0.002071293                           | 0.801421624                                        | 0.002401447                           |
| 0.008860195                                          | 0.011190237                           | 0.872164552                                        | 0.01675073                            |
| 0.011461034                                          | 0.012103028                           | 0.775918367                                        | 0.017394408                           |
| 0.000750533                                          | 0.001220082                           | 0.912394929                                        | 0.001691612                           |
| 0.002363057                                          | 0.002692432                           | 0.935164309                                        | 0.003599045                           |
| 0.003257597                                          | 0.003970904                           | 0.83728791                                         | 0.004996597                           |
| 0.000744415                                          | 0.001302083                           | 0.946408348                                        | 0.001668305                           |
| 0.000934673                                          | 0.001852957                           | 0.93767546                                         | 0.002218479                           |
| 0.010278915                                          | 0.018358613                           | 0.811634349                                        | 0.023883613                           |
| 0.001547936                                          | 0.001997786                           | 0.94240666                                         | 0.002574285                           |
| 0.009797136                                          | 0.010793509                           | 0.8828125                                          | 0.015322705                           |
| 0.006464031                                          | 0.009175687                           | 0.745                                              | 0.014451573                           |
| 0.003058868                                          | 0.003785484                           | 0.921699292                                        | 0.007374757                           |

| wavelet.LLH_gldzm_LargeDistanceEmphasis | wavelet.LLH_gldzm_HighIntensitySmallDistanceEmphasis | wavelet.LLH_gldzm_LowIntensityLargeDistanceEmphasis | wavelet.LLH_gldzm_HighIntensityEmphasis |
|-----------------------------------------|------------------------------------------------------|-----------------------------------------------------|-----------------------------------------|
| 1.027190332                             | 367.744713                                           | 0.01161757                                          | 368.836858                              |
| 1.121240602                             | 939.3839286                                          | 0.003544578                                         | 966.1456767                             |
| 1.265486726                             | 1881.836283                                          | 0.009916875                                         | 2045.424779                             |
| 1.215394567                             | 884.4193079                                          | 0.005078653                                         | 944.4062096                             |
| 1.125                                   | 708.5752315                                          | 0.008011186                                         | 738.3981481                             |
| 1.160714286                             | 1006.612883                                          | 0.005012095                                         | 1059.451531                             |
| 1.456                                   | 3299.109                                             | 0.004502927                                         | 3908.376                                |
| 1.249271137                             | 1490.277332                                          | 0.003361309                                         | 1641.034985                             |
| 1.09382716                              | 1050.9893                                            | 0.003775162                                         | 1074.772016                             |
| 1.096                                   | 3512.405                                             | 0.001455312                                         | 3599.2955                               |
| 1.172043011                             | 2450.28629                                           | 0.005346152                                         | 2578.301075                             |
| 1.16254417                              | 1609.337456                                          | 0.002238566                                         | 1677.183746                             |
| 1.10673732                              | 1780.225587                                          | 0.001755238                                         | 1837.271007                             |
| 1.116357504                             | 595.6462901                                          | 0.012419266                                         | 609.8330523                             |
| 1.254716981                             | 567.6386792                                          | 0.008328189                                         | 596.9339623                             |
| 1.141277641                             | 674.7490445                                          | 0.002672782                                         | 699.453317                              |
| 1.393794749                             | 924.3639618                                          | 0.00726137                                          | 1010.236277                             |
| 1.058933583                             | 839.4992984                                          | 0.002813989                                         | 856.2974743                             |
| 1.180722892                             | 555.7605422                                          | 0.007328853                                         | 580.5512048                             |
| 1.067460317                             | 2063.680225                                          | 0.001660774                                         | 2113.812169                             |
| 1.158104517                             | 516.3666962                                          | 0.004465981                                         | 539.0434012                             |
| 1.326858108                             | 2706.506546                                          | 0.001983912                                         | 3024.637669                             |
| 1.073684211                             | 254.3225146                                          | 0.009985639                                         | 257.3637427                             |
| 1.571428571                             | 1850.686975                                          | 0.005091862                                         | 2101.680672                             |
| 1.232858991                             | 1567.749677                                          | 0.003449587                                         | 1669.518758                             |
| 1.110629067                             | 1781.524403                                          | 0.003594841                                         | 1847.652928                             |
| 1.183123878                             | 4692.637904                                          | 0.001373166                                         | 4944.915619                             |
| 1.136094675                             | 6365.327416                                          | 0.003302964                                         | 6570.058185                             |
| 1.105302465                             | 2761.326923                                          | 0.003937594                                         | 2831.227035                             |
| 1.12470024                              | 1573.282574                                          | 0.001851787                                         | 1618.1255                               |
| 1.080937638                             | 7353.12406                                           | 0.00075975                                          | 7531.385228                             |
| 1.073778051                             | 1436.705272                                          | 0.001524463                                         | 1469.980326                             |
| 1.1228223                               | 1700.267639                                          | 0.004735039                                         | 1748.587108                             |
| 1.259259259                             | 1054.364198                                          | 0.016170315                                         | 1158.82716                              |
| 1.288702929                             | 1659.135983                                          | 0.018505643                                         | 1789.535565                             |
| 1.169270833                             | 895.6082899                                          | 0.002890523                                         | 941.8862847                             |
| 1.096359743                             | 4629.114293                                          | 0.001072445                                         | 4759.067452                             |
| 1.115025907                             | 1705.917617                                          | 0.001386217                                         | 1765.431088                             |
| 1.308823529                             | 3504.377298                                          | 0.002601208                                         | 3824.849265                             |
| 1.07                                    | 999.48375                                            | 0.004331898                                         | 1015.365                                |
| 1.24567474                              | 1498.233564                                          | 0.002573025                                         | 1589.567474                             |
| 1.135135135                             | 910.9990991                                          | 0.004716985                                         | 951.3747748                             |
| 1.155973451                             | 945.5425885                                          | 0.00335656                                          | 978.6935841                             |
| 1.325688073                             | 1191.441514                                          | 0.006644142                                         | 1316.931193                             |
| 1.217959184                             | 1535.63102                                           | 0.002264404                                         | 1632.44898                              |
| 1.072756669                             | 916.4894907                                          | 0.002433162                                         | 933.5424414                             |
| 1.268619247                             | 972.6904812                                          | 0.002478166                                         | 1047.167364                             |
| 1.145985401                             | 2137.328467                                          | 0.003743113                                         | 2229                                    |
| 1.434210526                             | 300.1315789                                          | 0.074330791                                         | 340.2763158                             |
| 1.354755784                             | 3994.161311                                          | 0.003760452                                         | 4506.257069                             |
| 1.087866109                             | 943.9465033                                          | 0.002387608                                         | 967.4632397                             |
| 1.041916168                             | 1326.227046                                          | 0.004782091                                         | 1346.830339                             |
| 1.135062953                             | 4027.516787                                          | 0.002263731                                         | 4186.01488                              |
| 1.163212435                             | 2050.976684                                          | 0.003772341                                         | 2177.170984                             |
| 1.06127451                              | 1054.5                                               | 0.001856473                                         | 1072.285539                             |
| 1.303370787                             | 1328.408507                                          | 0.003944673                                         | 1427.295345                             |
| 1.519528371                             | 1445.007922                                          | 0.002290768                                         | 1665.030951                             |
| 1.503125                                | 8426.977865                                          | 0.001366378                                         | 9962.089583                             |
| 1.17281106                              | 609.1330645                                          | 0.007130615                                         | 630.5115207                             |
| 1.064935065                             | 347.780303                                           | 0.011609767                                         | 350.9134199                             |
| 1.117142857                             | 536.8795238                                          | 0.004946202                                         | 555.6409524                             |
| 1.123064385                             | 5864.861722                                          | 0.000515694                                         | 6039.493344                             |
| 1.068219634                             | 2545.974071                                          | 0.001168988                                         | 2594.130893                             |
| 1.08269962                              | 1765.528279                                          | 0.001686948                                         | 1815.238593                             |
| 1.047619048                             | 342.9761905                                          | 0.014983544                                         | 350.5952381                             |
| 1.143652561                             | 984.0993875                                          | 0.006258434                                         | 1019.047884                             |
| 1.431438127                             | 2456.652174                                          | 0.008224645                                         | 2831.280936                             |
| 1.040350877                             | 1305.11886                                           | 0.001794498                                         | 1324.2                                  |
| 1.097165992                             | 730.4058704                                          | 0.010801184                                         | 752.708502                              |
| 1.144525547                             | 2538.903832                                          | 0.001620484                                         | 2695.364234                             |
| 1.197368421                             | 707.0207835                                          | 0.003770835                                         | 753.6549043                             |
| 1.075780089                             | 788.8443536                                          | 0.006432365                                         | 802.9316493                             |
| 1.068746953                             | 563.0403462                                          | 0.004113508                                         | 574.6348123                             |
| 1.074534161                             | 1072.471079                                          | 0.002146204                                         | 1090.274845                             |
| 1.070658683                             | 3007.32994                                           | 0.000734923                                         | 3056.012575                             |
| 1.307594937                             | 1728.025                                             | 0.002915472                                         | 1866.977215                             |
| 1.252475248                             | 2008.307859                                          | 0.00332543                                          | 2177.12005                              |
| 1.144303797                             | 945.5753165                                          | 0.006692502                                         | 1003.837975                             |
| 1.281984334                             | 2298.205178                                          | 0.002230488                                         | 2491.175805                             |
| 1.198373984                             | 4535.134282                                          | 0.001011665                                         | 4769.891599                             |
| 1.327272727                             | 1557.362879                                          | 0.004246049                                         | 1711.124242                             |
| 1.316648531                             | 1562.797606                                          | 0.006931815                                         | 1708.126224                             |
| 1.131815776                             | 2952.959502                                          | 0.001743231                                         | 3040.946533                             |
| 1.43902439                              | 487.9359756                                          | 0.0022933668                                        | 536.695122                              |
| 1.048714479                             | 476.9868065                                          | 0.004469989                                         | 482.3748309                             |
| 1.322970118                             | 5797.662977                                          | 0.000682467                                         | 6325.385149                             |
| 1.097192225                             | 433.088013                                           | 0.009155983                                         | 441.1144708                             |
| 1.335355286                             | 3036.732669                                          | 0.002595201                                         | 3446.865685                             |
| 1.205882353                             | 285.0098039                                          | 0.018150314                                         | 295.6568627                             |
| 1.385714286                             | 575.8321429                                          | 0.017968203                                         | 665.1142857                             |
| 1.137730871                             | 1476.337467                                          | 0.003544478                                         | 1535.888654                             |
| 1.100628931                             | 1806.029874                                          | 0.003758984                                         | 1843.389937                             |
| 1.268011527                             | 1894.991715                                          | 0.005305882                                         | 2048.027378                             |
| 1.082665331                             | 1277.028933                                          | 0.001762794                                         | 1303.993988                             |
| 1.096597146                             | 843.059367                                           | 0.00236553                                          | 869.5140871                             |
| 1.315789474                             | 332.4078947                                          | 0.026728791                                         | 358.6466165                             |
| 1.089032258                             | 1746.66                                              | 0.003062015                                         | 1779.917419                             |
| 1.1875                                  | 715.121875                                           | 0.015934026                                         | 748.675                                 |
| 1.45                                    | 245.7486111                                          | 0.037951164                                         | 277.1777778                             |
| 1.12244898                              | 938.462828                                           | 0.007530797                                         | 968.6268222                             |

| wavelet.LLH_gldzm_DistanceZoneVariability | wavelet.LLH_gldzm_ZonePercentage | wavelet.LLH_gldzm_IntensityVariabilityNormalized | wavelet.LLH_gldzm_LowIntensitySmallDistanceEmphasis | wavelet.LLH_gldzm_IntensityVariability |
|-------------------------------------------|----------------------------------|--------------------------------------------------|-----------------------------------------------------|----------------------------------------|
| 325.0543807                               | 0.468838527                      | 0.040479733                                      | 0.01140482                                          | 13.39879154                            |
| 981.4755639                               | 0.512277323                      | 0.026276924                                      | 0.003224367                                         | 27.95864662                            |
| 284.3097345                               | 0.781105991                      | 0.015549812                                      | 0.009652087                                         | 5.271386431                            |
| 1339.939198                               | 0.586717268                      | 0.034502928                                      | 0.001972206                                         | 53.34152652                            |
| 198.75                                    | 0.601671309                      | 0.034293553                                      | 0.007787838                                         | 7.407407407                            |
| 352.25                                    | 0.609642302                      | 0.032642649                                      | 0.004704228                                         | 12.79591837                            |
| 185.552                                   | 0.741839763                      | 0.019008                                         | 0.004383384                                         | 4.752                                  |
| 581.4723032                               | 0.684630739                      | 0.020794907                                      | 0.003141274                                         | 14.26530612                            |
| 1141.376955                               | 0.584415584                      | 0.031312977                                      | 0.003608597                                         | 38.04526749                            |
| 1876.096                                  | 0.645577792                      | 0.0126655                                        | 0.001397356                                         | 25.331                                 |
| 497.6702509                               | 0.674727932                      | 0.014407574                                      | 0.005235259                                         | 8.039426523                            |
| 761.9846879                               | 0.572874494                      | 0.027676155                                      | 0.00203183                                          | 23.49705536                            |
| 1230.344436                               | 0.636933462                      | 0.02472664                                       | 0.00162077                                          | 32.66389099                            |
| 548.7841484                               | 0.530411449                      | 0.035179966                                      | 0.005480473                                         | 20.86172007                            |
| 447.6415094                               | 0.581778266                      | 0.035770737                                      | 0.005971745                                         | 18.95849057                            |
| 1484.81941                                | 0.234345761                      | 0.05385031                                       | 0.002371033                                         | 87.66830467                            |
| 323.4391408                               | 0.600286533                      | 0.031311054                                      | 0.004162559                                         | 13.11933174                            |
| 1027.82507                                | 0.458404803                      | 0.034786801                                      | 0.002690773                                         | 37.18709074                            |
| 294.4096386                               | 0.570446735                      | 0.037777167                                      | 0.00623574                                          | 12.54216867                            |
| 1445.529101                               | 0.539807212                      | 0.017859766                                      | 0.001600841                                         | 27.00396825                            |
| 2032.542958                               | 0.432235835                      | 0.04184237                                       | 0.004010411                                         | 94.48007086                            |
| 954.1097973                               | 0.688372093                      | 0.015382464                                      | 0.00180986                                          | 18.21283784                            |
| 814.0315789                               | 0.313072135                      | 0.0584809                                        | 0.008127143                                         | 50.00116959                            |
| 246.9047619                               | 0.742203742                      | 0.016689029                                      | 0.004287663                                         | 5.957983193                            |
| 662.3143596                               | 0.642026578                      | 0.018062722                                      | 0.003084214                                         | 13.96248383                            |
| 428.2537961                               | 0.66426513                       | 0.019993318                                      | 0.003530393                                         | 9.21691974                             |
| 1972.603232                               | 0.642815926                      | 0.010658777                                      | 0.001253198                                         | 23.74775583                            |
| 926.17357                                 | 0.70760642                       | 0.012400359                                      | 0.003218467                                         | 12.5739645                             |
| 1248.299477                               | 0.758640227                      | 0.012055746                                      | 0.003785732                                         | 16.14264376                            |
| 1151.322942                               | 0.492132179                      | 0.028306052                                      | 0.00172307                                          | 35.4108713                             |
| 2142.291464                               | 0.711229947                      | 0.01060597                                       | 0.000740208                                         | 23.9800973                             |
| 3096.934829                               | 0.54856661                       | 0.026093249                                      | 0.001440398                                         | 84.8813403                             |
| 1057.848432                               | 0.564682735                      | 0.029885333                                      | 0.000964672                                         | 34.30836237                            |
| 68.20987654                               | 0.778846154                      | 0.032159732                                      | 0.015925782                                         | 2.604938272                            |
| 197.4267782                               | 0.719879518                      | 0.023966667                                      | 0.0023309                                           | 5.728033473                            |
| 1029.335069                               | 0.57029703                       | 0.032583731                                      | 0.002556572                                         | 37.53645833                            |
| 1751.85439                                | 0.648611111                      | 0.013622306                                      | 0.001031349                                         | 25.44646681                            |
| 1787.674611                               | 0.57543232                       | 0.030033558                                      | 0.001296157                                         | 57.96476684                            |
| 443.5294118                               | 0.651497006                      | 0.020065149                                      | 0.002473294                                         | 10.91544118                            |
| 572.6533333                               | 0.571973308                      | 0.029005556                                      | 0.004200249                                         | 17.40333333                            |
| 736.6286044                               | 0.588195387                      | 0.027140214                                      | 0.002311245                                         | 23.53056517                            |
| 507.2522523                               | 0.582371459                      | 0.033084977                                      | 0.004263412                                         | 18.36216216                            |
| 814.8871681                               | 0.550548112                      | 0.031881412                                      | 0.002913356                                         | 28.82079646                            |
| 527.4159021                               | 0.63804878                       | 0.021757428                                      | 0.004015035                                         | 14.2293578                             |
| 1059.932245                               | 0.65228967                       | 0.022487297                                      | 0.001900641                                         | 27.54693878                            |
| 1178.455133                               | 0.555206463                      | 0.036426695                                      | 0.002293682                                         | 45.05982215                            |
| 2000.323013                               | 0.560243788                      | 0.034267957                                      | 0.001992377                                         | 81.90041841                            |
| 372.946472                                | 0.704974271                      | 0.018369534                                      | 0.003620333                                         | 7.549878345                            |
| 57.18421053                               | 0.567164179                      | 0.056786704                                      | 0.009961076                                         | 4.315789474                            |
| 307.8791774                               | 0.782696177                      | 0.012232274                                      | 0.003637985                                         | 4.758354756                            |
| 1577.870293                               | 0.488609813                      | 0.035345305                                      | 0.002088126                                         | 59.13269576                            |
| 487.1956088                               | 0.605804111                      | 0.020083585                                      | 0.004446894                                         | 10.06187625                            |
| 2395.624952                               | 0.685946087                      | 0.010937253                                      | 0.002194297                                         | 28.66653949                            |
| 346.2849741                               | 0.653130288                      | 0.02204086                                       | 0.003687666                                         | 8.507772021                            |
| 2350.042484                               | 0.375287444                      | 0.04067179                                       | 0.001760459                                         | 99.56454248                            |
| 509.741573                                | 0.708759954                      | 0.024040976                                      | 0.003021469                                         | 14.97752809                            |
| 968.3927782                               | 0.61878705                       | 0.02831303                                       | 0.00152307                                          | 38.42078113                            |
| 692.0020833                               | 0.742459397                      | 0.010384115                                      | 0.001273512                                         | 9.96875                                |
| 386.8801843                               | 0.533169533                      | 0.037577778                                      | 0.006407398                                         | 16.30875576                            |
| 442.4329004                               | 0.524404086                      | 0.041537827                                      | 0.008699156                                         | 19.19047619                            |
| 971.2019048                               | 0.495516753                      | 0.036094331                                      | 0.004370834                                         | 37.89904762                            |
| 3391.388481                               | 0.67196057                       | 0.016002275                                      | 0.00048126                                          | 58.90437381                            |
| 1722.86467                                | 0.583495146                      | 0.023321887                                      | 0.001128397                                         | 42.04936217                            |
| 995.5988593                               | 0.385206884                      | 0.032456736                                      | 0.001634444                                         | 34.14448669                            |
| 122.0634921                               | 0.580645161                      | 0.041062879                                      | 0.014838222                                         | 5.174603175                            |
| 816.1180401                               | 0.578235673                      | 0.033377811                                      | 0.001715031                                         | 29.97327394                            |
| 225.367893                                | 0.758883249                      | 0.01414973                                       | 0.005627532                                         | 4.230769231                            |
| 1664.618713                               | 0.534876447                      | 0.029002428                                      | 0.001750212                                         | 49.59415205                            |
| 231.5182186                               | 0.553811659                      | 0.032208363                                      | 0.006866134                                         | 7.95465587                             |
| 1244.359124                               | 0.681253108                      | 0.017846449                                      | 0.001553355                                         | 24.44963504                            |
| 1466.473684                               | 0.55                             | 0.03264935                                       | 0.003091546                                         | 54.58971292                            |
| 639.858841                                | 0.596102746                      | 0.030722254                                      | 0.006003511                                         | 20.67607727                            |
| 1959.154071                               | 0.396865325                      | 0.043505671                                      | 0.003915311                                         | 89.23013164                            |
| 2451.180124                               | 0.383561644                      | 0.043413159                                      | 0.002023748                                         | 111.8322981                            |
| 4779.558483                               | 0.545751634                      | 0.022363258                                      | 0.000692906                                         | 112.0399202                            |
| 644.6101266                               | 0.707885305                      | 0.023137318                                      | 0.002367553                                         | 18.27848101                            |
| 683.4455446                               | 0.723366159                      | 0.017182752                                      | 0.002863223                                         | 13.88366337                            |
| 358.8278481                               | 0.647540984                      | 0.023246275                                      | 0.006522693                                         | 9.182278481                            |
| 953.3028721                               | 0.651360544                      | 0.019700788                                      | 0.002009399                                         | 22.6362054                             |
| 1617.134417                               | 0.648278285                      | 0.013081279                                      | 0.000927601                                         | 24.13495935                            |
| 265.8545455                               | 0.654761905                      | 0.026703398                                      | 0.003898803                                         | 8.812121212                            |
| 745.476605                                | 0.685309471                      | 0.024162849                                      | 0.001479816                                         | 22.20565832                            |
| 1730.293806                               | 0.676575931                      | 0.017260499                                      | 0.001669681                                         | 32.60508205                            |
| 61.51219512                               | 0.565517241                      | 0.044021416                                      | 0.015382898                                         | 3.609756098                            |
| 1430.779432                               | 0.435859628                      | 0.044224632                                      | 0.004216032                                         | 65.36400541                            |
| 2678.865379                               | 0.605003652                      | 0.013294945                                      | 0.000570916                                         | 44.04618171                            |
| 433.9719222                               | 0.595115681                      | 0.036661084                                      | 0.008316937                                         | 16.97408207                            |
| 924.8040546                               | 0.743556701                      | 0.011230623                                      | 0.002353008                                         | 12.96013865                            |
| 88.96078431                               | 0.557377049                      | 0.05017301                                       | 0.016400834                                         | 5.117647059                            |
| 54.31428571                               | 0.666666667                      | 0.047346939                                      | 0.01725096                                          | 3.314285714                            |
| 1728.988391                               | 0.47672956                       | 0.030895079                                      | 0.00122847                                          | 58.54617414                            |
| 446.0733753                               | 0.675637394                      | 0.021223668                                      | 0.00355906                                          | 10.12368973                            |
| 581.0778098                               | 0.679060665                      | 0.018067586                                      | 0.004919275                                         | 12.5389049                             |
| 1889.031062                               | 0.48801956                       | 0.031230296                                      | 0.001644683                                         | 62.33567134                            |
| 2562.667033                               | 0.470719945                      | 0.03469005                                       | 0.002181717                                         | 94.58653494                            |
| 107.9473684                               | 0.5256917                        | 0.040081407                                      | 0.023172319                                         | 5.330827068                            |
| 730.3651613                               | 0.637335526                      | 0.019870968                                      | 0.002452353                                         | 15.4                                   |
| 70.625                                    | 0.650406504                      | 0.0359375                                        | 0.015169875                                         | 2.875                                  |
| 134.1                                     | 0.474934037                      | 0.054567901                                      | 0.008576675                                         | 9.822222222                            |
| 316.1428571                               | 0.425030979                      | 0.034942923                                      | 0.007335747                                         | 11.98542274                            |



| wavelet.LLH_gldzm_HighIntensityLargeDistanceEmphasis | wavelet.LLH_gldzm_SmallDistanceEmphasis | wavelet.LLH_glcm_SumVariance | wavelet.LLH_glcm_Homogeneity1 | wavelet.LLH_glcm_Homogeneity2 |
|------------------------------------------------------|-----------------------------------------|------------------------------|-------------------------------|-------------------------------|
| 373.2054381                                          | 0.993202417                             | 940.7479088                  | 0.274471633                   | 0.184427185                   |
| 1073.192669                                          | 0.96968985                              | 3056.650991                  | 0.272268777                   | 0.193915444                   |
| 2699.778761                                          | 0.933628319                             | 7899.742538                  | 0.1456623                     | 0.070810513                   |
| 1184.353816                                          | 0.946151358                             | 3056.112372                  | 0.225590709                   | 0.139107415                   |
| 857.6898148                                          | 0.96875                                 | 2396.671799                  | 0.231484063                   | 0.142342726                   |
| 1270.806122                                          | 0.959821429                             | 3315.632012                  | 0.220244303                   | 0.132922287                   |
| 6345.444                                             | 0.886                                   | 15027.05324                  | 0.155222653                   | 0.080039406                   |
| 2244.065598                                          | 0.937682216                             | 5461.851769                  | 0.171337976                   | 0.091259569                   |
| 1169.902881                                          | 0.97654321                              | 3424.743061                  | 0.222944966                   | 0.134798169                   |
| 3946.8575                                            | 0.976                                   | 12589.11252                  | 0.194063066                   | 0.111125469                   |
| 3090.360215                                          | 0.956989247                             | 8939.578178                  | 0.188079148                   | 0.104415832                   |
| 1948.568905                                          | 0.959363958                             | 5639.237628                  | 0.224469529                   | 0.135027774                   |
| 2065.452687                                          | 0.97331567                              | 6310.713557                  | 0.199545317                   | 0.114687296                   |
| 666.5801012                                          | 0.970910624                             | 1809.107379                  | 0.24841419                    | 0.157325868                   |
| 714.1150943                                          | 0.936320755                             | 1700.410488                  | 0.219592592                   | 0.131758391                   |
| 800.5663391                                          | 0.96536309                              | 2267.397602                  | 0.455019724                   | 0.391670769                   |
| 1353.725537                                          | 0.901551313                             | 3212.826691                  | 0.212746388                   | 0.126501129                   |
| 923.4901777                                          | 0.985266604                             | 2636.301422                  | 0.280176084                   | 0.191850849                   |
| 679.7138554                                          | 0.954819277                             | 1676.998265                  | 0.230901476                   | 0.141444406                   |
| 2314.339947                                          | 0.983134921                             | 6927.655105                  | 0.260406264                   | 0.176706222                   |
| 629.7502214                                          | 0.960473871                             | 1627.007281                  | 0.308050275                   | 0.223718465                   |
| 4297.162162                                          | 0.918285473                             | 10563.33874                  | 0.176824758                   | 0.09617977                    |
| 269.528655                                           | 0.981578947                             | 640.7485488                  | 0.381476434                   | 0.298425933                   |
| 3105.655462                                          | 0.857142857                             | 6350.503405                  | 0.15379775                    | 0.077998194                   |
| 2076.595084                                          | 0.941785252                             | 5374.043581                  | 0.209704805                   | 0.124662735                   |
| 2112.167028                                          | 0.972342733                             | 6147.059389                  | 0.199507199                   | 0.114172146                   |
| 5954.026481                                          | 0.954219031                             | 17199.206                    | 0.192446546                   | 0.110648501                   |
| 7388.981262                                          | 0.965976331                             | 26240.36108                  | 0.175267645                   | 0.098896709                   |
| 3110.827483                                          | 0.973674384                             | 8839.490329                  | 0.147612676                   | 0.07438255                    |
| 1797.497202                                          | 0.96882494                              | 5398.887842                  | 0.280643029                   | 0.203608295                   |
| 8244.429898                                          | 0.97976559                              | 27898.60157                  | 0.168692666                   | 0.089493021                   |
| 1603.080541                                          | 0.981555487                             | 4924.51037                   | 0.2519177                     | 0.166262941                   |
| 1941.864983                                          | 0.969294425                             | 5762.530345                  | 0.22759621                    | 0.140425547                   |
| 1576.679012                                          | 0.935185185                             | 4037.387377                  | 0.184330327                   | 0.104438209                   |
| 2311.133891                                          | 0.927824268                             | 6251.634841                  | 0.166437481                   | 0.087199748                   |
| 1126.998264                                          | 0.957682292                             | 2978.156788                  | 0.228467296                   | 0.139765679                   |
| 5278.880086                                          | 0.975910064                             | 16343.23311                  | 0.192644208                   | 0.110390365                   |
| 2003.484974                                          | 0.971243523                             | 5944.033387                  | 0.22600494                    | 0.13993551                    |
| 5106.737132                                          | 0.922794118                             | 14699.81293                  | 0.185190127                   | 0.102094911                   |
| 1078.89                                              | 0.9825                                  | 3155.163949                  | 0.219008717                   | 0.132394921                   |
| 1954.903114                                          | 0.938581315                             | 5259.214377                  | 0.226894279                   | 0.138083685                   |
| 1112.877477                                          | 0.966216216                             | 3015.964347                  | 0.226791885                   | 0.137622399                   |
| 1111.297566                                          | 0.961006637                             | 2980.543082                  | 0.232868819                   | 0.145131969                   |
| 1818.889908                                          | 0.918577982                             | 4281.052142                  | 0.192401665                   | 0.10999345                    |
| 2019.720816                                          | 0.945510204                             | 5409.171656                  | 0.192548973                   | 0.10838573                    |
| 1001.754244                                          | 0.981810833                             | 2996.1804                    | 0.256617316                   | 0.167165173                   |
| 1345.074895                                          | 0.932845188                             | 3439.906757                  | 0.23169767                    | 0.145205099                   |
| 2595.686131                                          | 0.96350365                              | 8156.372218                  | 0.178158102                   | 0.096638512                   |
| 500.8552632                                          | 0.891447368                             | 999.3579572                  | 0.260609764                   | 0.174236902                   |
| 6554.640103                                          | 0.911311054                             | 17070.55118                  | 0.135800181                   | 0.066982903                   |
| 1061.530185                                          | 0.978033473                             | 3082.826934                  | 0.272831552                   | 0.184801124                   |
| 1429.243513                                          | 0.989520958                             | 4624.541953                  | 0.218100066                   | 0.129601669                   |
| 4820.007249                                          | 0.966234262                             | 14924.36456                  | 0.174704514                   | 0.096310755                   |
| 2681.948187                                          | 0.959196891                             | 7514.35369                   | 0.18731492                    | 0.104325601                   |
| 1143.427696                                          | 0.984681373                             | 3533.182878                  | 0.350266567                   | 0.274949979                   |
| 1822.842697                                          | 0.924157303                             | 4586.751434                  | 0.170578367                   | 0.091118889                   |
| 2545.123066                                          | 0.870117907                             | 5540.429662                  | 0.198856324                   | 0.113568667                   |
| 16102.53646                                          | 0.87421875                              | 40041.3024                   | 0.152496951                   | 0.077759013                   |
| 716.0253456                                          | 0.956797235                             | 1856.795264                  | 0.262832983                   | 0.176380852                   |
| 363.4458874                                          | 0.983766234                             | 893.0884587                  | 0.252449845                   | 0.161381196                   |
| 630.6866667                                          | 0.970714286                             | 1569.590443                  | 0.26097891                    | 0.172697067                   |
| 6738.019832                                          | 0.969233904                             | 21620.7219                   | 0.185132883                   | 0.104886689                   |
| 2786.758181                                          | 0.982945092                             | 9167.884439                  | 0.235498369                   | 0.1524263                     |
| 2014.079848                                          | 0.979325095                             | 6365.59177                   | 0.340988123                   | 0.267189575                   |
| 381.0714286                                          | 0.988095238                             | 1016.099553                  | 0.251591634                   | 0.160320642                   |
| 1158.841871                                          | 0.96408686                              | 3163.727633                  | 0.224786084                   | 0.139017605                   |
| 4329.795987                                          | 0.892140468                             | 10185.92755                  | 0.139758611                   | 0.068151623                   |
| 1400.524561                                          | 0.989912281                             | 4143.144611                  | 0.23680009                    | 0.149836384                   |
| 841.9190283                                          | 0.975708502                             | 2364.22142                   | 0.233299207                   | 0.144040151                   |
| 3321.205839                                          | 0.963868613                             | 9448.007455                  | 0.182665794                   | 0.099885137                   |
| 940.1913876                                          | 0.950657895                             | 2301.937389                  | 0.242528947                   | 0.153991802                   |
| 859.2808321                                          | 0.981054978                             | 2358.497157                  | 0.22264826                    | 0.134377646                   |
| 621.0126767                                          | 0.982813262                             | 1790.679922                  | 0.323782096                   | 0.239606832                   |
| 1161.489907                                          | 0.98136646                              | 3696.152377                  | 0.32652976                    | 0.243271914                   |
| 3250.743114                                          | 0.982335329                             | 10630.82609                  | 0.240849113                   | 0.155806109                   |
| 2422.786076                                          | 0.923101266                             | 6238.530282                  | 0.164448082                   | 0.085135433                   |
| 2852.368812                                          | 0.936881188                             | 7369.993261                  | 0.162773172                   | 0.082956378                   |
| 1236.888608                                          | 0.963924051                             | 3015.884866                  | 0.189665253                   | 0.105590677                   |
| 3263.058312                                          | 0.929503916                             | 8586.174875                  | 0.190627709                   | 0.106811193                   |
| 5708.920867                                          | 0.950406504                             | 15592.40393                  | 0.195981022                   | 0.112295672                   |
| 2326.169697                                          | 0.918181818                             | 5684.258553                  | 0.187789411                   | 0.105852044                   |
| 2289.440696                                          | 0.920837867                             | 5610.086599                  | 0.178173301                   | 0.098043864                   |
| 3392.894653                                          | 0.967046056                             | 9751.961027                  | 0.193612096                   | 0.108376892                   |
| 731.7317073                                          | 0.890243902                             | 1613.804475                  | 0.245157783                   | 0.158795242                   |
| 503.9269283                                          | 0.98782138                              | 1407.50485                   | 0.307632468                   | 0.219743367                   |
| 8440.480833                                          | 0.91959285                              | 23538.47585                  | 0.208852044                   | 0.122993532                   |
| 473.2203024                                          | 0.975701944                             | 1168.208666                  | 0.236406821                   | 0.145043249                   |
| 5087.397747                                          | 0.916161179                             | 12171.8461                   | 0.147805061                   | 0.073550816                   |
| 338.245098                                           | 0.948529412                             | 960.81105                    | 0.27249907                    | 0.178626899                   |
| 1022.242857                                          | 0.903571429                             | 2354.957832                  | 0.219673686                   | 0.131003681                   |
| 1774.093404                                          | 0.965567282                             | 5114.219728                  | 0.280990535                   | 0.199663946                   |
| 1992.830189                                          | 0.974842767                             | 6231.761016                  | 0.189329652                   | 0.105772111                   |
| 2660.170029                                          | 0.932997118                             | 7215.925249                  | 0.177386237                   | 0.095214762                   |
| 1411.854208                                          | 0.979333667                             | 4214.591857                  | 0.266549676                   | 0.178786435                   |
| 975.3329674                                          | 0.975850714                             | 2695.795755                  | 0.273215817                   | 0.183615551                   |
| 463.6015038                                          | 0.921052632                             | 1007.424745                  | 0.26306615                    | 0.170629337                   |
| 1912.947097                                          | 0.977741935                             | 6079.623255                  | 0.197558406                   | 0.112236198                   |
| 882.8875                                             | 0.953125                                | 2118.835388                  | 0.208222905                   | 0.125792583                   |
| 402.8944444                                          | 0.8875                                  | 802.5041133                  | 0.283088042                   | 0.191622239                   |
| 1089.282799                                          | 0.969387755                             | 3261.756272                  | 0.308493389                   | 0.226032812                   |









| wavelet.LLH_firstorder_Uniformity | wavelet.LLH_firstorder_MeanAbsoluteDeviation | wavelet.LLH_firstorder_Energy | wavelet.LLH_firstorder_RobustMeanAbsoluteDeviation | wavelet.LLH_firstorder_Median |
|-----------------------------------|----------------------------------------------|-------------------------------|----------------------------------------------------|-------------------------------|
| 0.054305869                       | 113.040879                                   | 1603888.71                    | 72.36183629                                        | -7.84182843                   |
| 0.041432995                       | 169.8478821                                  | 112182780.1                   | 104.2180675                                        | -13.21693246                  |
| 0.015598123                       | 423.3810513                                  | 128120715.9                   | 323.1537274                                        | -214.5090808                  |
| 0.042700186                       | 138.5387593                                  | 88924386.95                   | 89.18602137                                        | 0.822648536                   |
| 0.038679092                       | 161.5322266                                  | 15123860.06                   | 111.5846316                                        | 0.241728691                   |
| 0.035426377                       | 166.7677295                                  | 29853821.52                   | 114.5459812                                        | -42.7676635                   |
| 0.019943823                       | 345.6189892                                  | 74745339.89                   | 252.1255562                                        | 257.8991057                   |
| 0.020995932                       | 287.7043418                                  | 125398022.8                   | 207.0669046                                        | -42.6387603                   |
| 0.037983305                       | 155.7732911                                  | 89613705.87                   | 99.7752441                                         | 0.337007657                   |
| 0.013561093                       | 453.2526058                                  | 1022143638                    | 322.824003                                         | 41.52827627                   |
| 0.015003019                       | 433.5579176                                  | 237803641.5                   | 327.3963415                                        | 141.1242032                   |
| 0.030929863                       | 188.8819931                                  | 90701539.67                   | 128.3142048                                        | -47.48774544                  |
| 0.02683451                        | 221.8487845                                  | 165110657.2                   | 152.4171561                                        | -7.301799599                  |
| 0.040060036                       | 146.7277878                                  | 40422248.93                   | 98.34318305                                        | -1.176705141                  |
| 0.039055525                       | 148.187688                                   | 31876794.95                   | 103.2816275                                        | 17.63839653                   |
| 0.14693672                        | 54.76512139                                  | 54099873.49                   | 25.6746411                                         | -0.550353615                  |
| 0.03944713                        | 171.9541525                                  | 32371177.04                   | 121.5067509                                        | 3.697338174                   |
| 0.047141125                       | 128.4005845                                  | 68182047.56                   | 81.84559217                                        | 2.415500896                   |
| 0.040882843                       | 141.9547449                                  | 18781010.37                   | 97.79180605                                        | 13.68407716                   |
| 0.023553709                       | 303.6213838                                  | 422673821.4                   | 205.2386639                                        | -26.13040527                  |
| 0.066723644                       | 95.00033852                                  | 89885154.48                   | 57.83501342                                        | -8.051958626                  |
| 0.016234451                       | 367.0742091                                  | 348690490.1                   | 266.2936126                                        | 39.2712957                    |
| 0.079415169                       | 75.30042535                                  | 28119941.01                   | 47.99495597                                        | -7.804876442                  |
| 0.016887029                       | 380.213764                                   | 110604971.4                   | 285.2700158                                        | -186.7517671                  |
| 0.019556903                       | 304.4565126                                  | 170586631.4                   | 216.7971197                                        | -27.31343099                  |
| 0.022494166                       | 282.8093053                                  | 137665029.7                   | 188.7744981                                        | -286.7795393                  |
| 0.011219034                       | 570.6229004                                  | 1632122893                    | 440.849306                                         | 27.52781798                   |
| 0.013845217                       | 605.7965498                                  | 1312670966                    | 458.7639594                                        | 877.2104082                   |
| 0.013021531                       | 563.184024                                   | 1240823631                    | 409.8917853                                        | -688.1727003                  |
| 0.051727218                       | 150.328261                                   | 120143278.5                   | 86.59860583                                        | -16.06785686                  |
| 0.010814225                       | 631.8385606                                  | 1851301665                    | 510.8602794                                        | 174.3590526                   |
| 0.031268339                       | 193.5546471                                  | 374632780.4                   | 131.8753492                                        | 18.82467571                   |
| 0.037401808                       | 162.5584667                                  | 99949864.52                   | 101.7412639                                        | -13.90923378                  |
| 0.03568787                        | 215.2309153                                  | 8545059.422                   | 140.6517511                                        | 94.89646071                   |
| 0.025112498                       | 258.6435435                                  | 35553048.97                   | 173.955746                                         | 45.24876616                   |
| 0.037624743                       | 153.8384138                                  | 79206065.62                   | 104.6330226                                        | -17.37386637                  |
| 0.014977575                       | 408.0736962                                  | 2014213331                    | 266.674253                                         | -651.9076293                  |
| 0.038300818                       | 156.4689686                                  | 147745977.1                   | 100.3766224                                        | -15.46418252                  |
| 0.020735057                       | 304.8705786                                  | 217963875.8                   | 203.6545343                                        | 351.660293                    |
| 0.034862745                       | 176.5778296                                  | 58829987.75                   | 111.7116323                                        | -27.21177154                  |
| 0.031388942                       | 194.5881443                                  | 146986930.6                   | 128.9625748                                        | -166.3908243                  |
| 0.036922118                       | 158.6249613                                  | 40159303.85                   | 106.4120225                                        | -11.72443771                  |
| 0.035916213                       | 160.0537203                                  | 69439546.89                   | 107.5626082                                        | 3.536424831                   |
| 0.023516478                       | 258.5336009                                  | 102742912.6                   | 189.0148018                                        | -3.156204167                  |
| 0.024186222                       | 243.8730697                                  | 195990819.4                   | 161.9910012                                        | 39.58144961                   |
| 0.043071855                       | 134.7976839                                  | 68575359.2                    | 89.95240099                                        | 15.30366107                   |
| 0.042708194                       | 137.4293282                                  | 140577786.1                   | 89.35998418                                        | -3.361329759                  |
| 0.018614901                       | 348.7321206                                  | 100473779.6                   | 268.0068949                                        | -23.24501783                  |
| 0.073513032                       | 114.4436814                                  | 3158069.405                   | 67.06364082                                        | 15.59073151                   |
| 0.013169561                       | 509.9696978                                  | 202832169.5                   | 359.2515036                                        | 129.2570748                   |
| 0.044499827                       | 131.8068179                                  | 101570134                     | 87.66820497                                        | -9.91177958                   |
| 0.019781293                       | 309.6345886                                  | 122405218.1                   | 220.0850981                                        | -31.39772196                  |
| 0.011388941                       | 534.7227746                                  | 1675030760                    | 407.1330238                                        | 108.6551934                   |
| 0.023828951                       | 261.7701197                                  | 73621688.63                   | 174.2568131                                        | -118.8544265                  |
| 0.084663851                       | 92.09144351                                  | 132087814.2                   | 46.60892339                                        | -2.594724375                  |
| 0.025469785                       | 232.0109395                                  | 74685619.3                    | 162.906334                                         | -26.3517273                   |
| 0.03316339                        | 178.0474489                                  | 122444438.7                   | 116.1816529                                        | -13.94551945                  |
| 0.011500441                       | 658.68009                                    | 835655604.3                   | 476.1750036                                        | 264.9882289                   |
| 0.046824913                       | 128.5466684                                  | 23586781.66                   | 83.14016577                                        | -9.513422968                  |
| 0.045334666                       | 130.2918447                                  | 22548362.82                   | 94.85984915                                        | -25.61208592                  |
| 0.045384341                       | 128.7941721                                  | 60270582.02                   | 84.71063659                                        | -18.00796467                  |
| 0.017883343                       | 342.1018804                                  | 1149440886                    | 224.8289929                                        | -126.5335167                  |
| 0.030340068                       | 210.2122026                                  | 257115590.5                   | 129.955603                                         | 13.29241683                   |
| 0.063591585                       | 120.6159642                                  | 81935363.67                   | 69.07822437                                        | 2.212416318                   |
| 0.047420841                       | 129.7884617                                  | 6247325.76                    | 91.55302753                                        | -48.82308457                  |
| 0.040245724                       | 146.6766283                                  | 57948273.11                   | 95.82488083                                        | -0.859017583                  |
| 0.01463578                        | 459.0888631                                  | 124598587.1                   | 345.9655628                                        | 190.2548467                   |
| 0.035763412                       | 176.2566573                                  | 188477705.4                   | 108.3012023                                        | -30.44334618                  |
| 0.035251061                       | 176.2009879                                  | 21603434.89                   | 131.0476648                                        | -54.53898815                  |
| 0.019185628                       | 331.5015618                                  | 509285031.8                   | 209.4410638                                        | -294.2235017                  |
| 0.039176766                       | 149.1079434                                  | 113660392.3                   | 99.67378724                                        | -3.443538846                  |
| 0.034474805                       | 175.7631537                                  | 57854225.85                   | 117.5201015                                        | -35.82806333                  |
| 0.067134453                       | 94.9395506                                   | 90361401.95                   | 57.26383111                                        | -5.599332292                  |
| 0.072519609                       | 93.84709329                                  | 125378211.7                   | 53.18718353                                        | -8.814336646                  |
| 0.028535013                       | 228.0956223                                  | 992139504.6                   | 141.8417632                                        | -68.71430018                  |
| 0.024126103                       | 245.4462526                                  | 104251505.1                   | 174.6569339                                        | -12.85967364                  |
| 0.017388147                       | 341.4304572                                  | 203082234.5                   | 240.5504076                                        | -17.9959477                   |
| 0.024009675                       | 252.1490548                                  | 57545522.64                   | 183.9505454                                        | -14.07116277                  |
| 0.020486577                       | 288.2178497                                  | 247921359.8                   | 192.8372742                                        | -28.69506016                  |
| 0.015246954                       | 425.6480156                                  | 1837541438                    | 278.3996363                                        | -661.6816911                  |
| 0.027273873                       | 219.1573986                                  | 38591250.78                   | 155.5902848                                        | -38.11418862                  |
| 0.026463606                       | 222.0537858                                  | 109872295.8                   | 149.0246596                                        | 11.24864978                   |
| 0.018152047                       | 335.7403631                                  | 1131347974                    | 221.1545894                                        | -455.1689797                  |
| 0.056171225                       | 129.0755564                                  | 4516231.631                   | 77.07229898                                        | 0.038182116                   |
| 0.06270758                        | 96.76706478                                  | 57771083.46                   | 60.80481476                                        | 2.169204037                   |
| 0.014305401                       | 421.9862117                                  | 1580819885                    | 289.1856871                                        | -11.16225667                  |
| 0.040480171                       | 144.2173101                                  | 25728307.74                   | 99.97461017                                        | -22.41328873                  |
| 0.011803028                       | 582.324901                                   | 999455632.6                   | 458.5568655                                        | -587.7354404                  |
| 0.059452357                       | 105.9582104                                  | 3466903.602                   | 72.11155563                                        | -14.1632387                   |
| 0.055238095                       | 135.1676951                                  | 3482618.241                   | 81.77772118                                        | 15.76793034                   |
| 0.048524979                       | 147.8495455                                  | 180008785.9                   | 83.97108705                                        | -2.550313399                  |
| 0.02194063                        | 270.909753                                   | 76757360.42                   | 198.1986268                                        | -36.38478275                  |
| 0.018307605                       | 343.8791125                                  | 262865136.5                   | 246.0116266                                        | 336.75341                     |
| 0.04042874                        | 149.4737693                                  | 167370769.5                   | 95.31004082                                        | -22.74695089                  |
| 0.046728004                       | 131.7649383                                  | 191293075.8                   | 81.4506102                                         | -19.81044833                  |
| 0.051289662                       | 119.861979                                   | 6433138.883                   | 76.77502407                                        | -27.69649628                  |
| 0.020755335                       | 282.6357395                                  | 147209950.7                   | 202.832291                                         | 21.58087955                   |
| 0.044880693                       | 167.0743658                                  | 5911174.06                    | 106.2907818                                        | -10.92823475                  |
| 0.068093372                       | 88.74886732                                  | 5130086.639                   | 58.91606957                                        | -3.214682003                  |
| 0.061891842                       | 115.8647333                                  | 24141202.86                   | 66.84318011                                        | -28.57115082                  |







| wavelet.LLH_glrIm_ShortRunLowGrayLevelEmphasis | wavelet.LLH_glrIm_GrayLevelVariance | wavelet.LLH_glrIm_LowGrayLevelRunEmphasis | wavelet.LLH_glrIm_GrayLevelNonUniformityNormalized | wavelet.LLH_glrIm_RunVariance |
|------------------------------------------------|-------------------------------------|-------------------------------------------|----------------------------------------------------|-------------------------------|
| 0.00783854                                     | 37.53655631                         | 0.008024751                               | 0.052564736                                        | 0.067027304                   |
| 0.003232376                                    | 90.38311527                         | 0.003392936                               | 0.037724539                                        | 0.097654977                   |
| 0.010429479                                    | 403.4857312                         | 0.010630148                               | 0.015594485                                        | 0.020577575                   |
| 0.002047309                                    | 55.39503073                         | 0.002087664                               | 0.041782042                                        | 0.049099989                   |
| 0.005523852                                    | 67.57951416                         | 0.005576024                               | 0.038228814                                        | 0.045581639                   |
| 0.003812554                                    | 73.13984063                         | 0.003874035                               | 0.035148127                                        | 0.040828046                   |
| 0.00341845                                     | 284.9775551                         | 0.003424322                               | 0.0198348                                          | 0.024663416                   |
| 0.002546325                                    | 200.6419575                         | 0.002570015                               | 0.020967                                           | 0.028806004                   |
| 0.003149016                                    | 70.29952355                         | 0.003217962                               | 0.037472304                                        | 0.042828407                   |
| 0.001136183                                    | 500.7349168                         | 0.001152028                               | 0.013464789                                        | 0.035830599                   |
| 0.004168048                                    | 438.6216416                         | 0.004211167                               | 0.014948442                                        | 0.033775582                   |
| 0.001519348                                    | 95.4482923                          | 0.001543149                               | 0.030605968                                        | 0.047684723                   |
| 0.001308271                                    | 128.2133237                         | 0.001325577                               | 0.026658115                                        | 0.036951862                   |
| 0.005764415                                    | 58.77024996                         | 0.005915549                               | 0.039481501                                        | 0.056340978                   |
| 0.006074764                                    | 56.31919396                         | 0.006241275                               | 0.03885111                                         | 0.043820834                   |
| 0.001643889                                    | 14.31870749                         | 0.001819871                               | 0.12534796                                         | 0.295880274                   |
| 0.004729213                                    | 74.00854703                         | 0.004851807                               | 0.033789523                                        | 0.040616887                   |
| 0.002037457                                    | 48.16944783                         | 0.002106066                               | 0.045616482                                        | 0.072573322                   |
| 0.004961607                                    | 52.54835308                         | 0.005056036                               | 0.040654747                                        | 0.046053948                   |
| 0.001264353                                    | 246.8332094                         | 0.001298057                               | 0.021962313                                        | 0.086060898                   |
| 0.002997405                                    | 29.02259474                         | 0.003118373                               | 0.062199224                                        | 0.105446151                   |
| 0.001466656                                    | 321.2661352                         | 0.001479618                               | 0.016170113                                        | 0.031766562                   |
| 0.006666366                                    | 17.21135096                         | 0.007090534                               | 0.076868219                                        | 0.119951343                   |
| 0.003751092                                    | 331.4289778                         | 0.003780293                               | 0.016836224                                        | 0.025486296                   |
| 0.002688607                                    | 228.3787641                         | 0.002741089                               | 0.019348215                                        | 0.039155748                   |
| 0.002709815                                    | 216.5680365                         | 0.002729364                               | 0.022232974                                        | 0.034156583                   |
| 0.001282034                                    | 726.7592259                         | 0.001314118                               | 0.011152163                                        | 0.038528291                   |
| 0.002565005                                    | 821.9010296                         | 0.002579718                               | 0.013689736                                        | 0.025705896                   |
| 0.003681266                                    | 749.7850944                         | 0.003732109                               | 0.012947663                                        | 0.022799716                   |
| 0.001229217                                    | 78.23427503                         | 0.001265789                               | 0.046022821                                        | 0.113490035                   |
| 0.000595389                                    | 828.5822811                         | 0.000599312                               | 0.010792966                                        | 0.028137583                   |
| 0.001206958                                    | 99.49501178                         | 0.001242624                               | 0.03023414                                         | 0.06809201                    |
| 0.001272704                                    | 80.55050197                         | 0.001295012                               | 0.036619081                                        | 0.04967078                    |
| 0.014024187                                    | 126.7228617                         | 0.014115413                               | 0.035125861                                        | 0.025260108                   |
| 0.004362826                                    | 171.9460881                         | 0.004384018                               | 0.025000595                                        | 0.028084859                   |
| 0.002099068                                    | 62.84283045                         | 0.002143912                               | 0.037205883                                        | 0.049615559                   |
| 0.000819116                                    | 468.4319176                         | 0.000828438                               | 0.014852441                                        | 0.036948231                   |
| 0.001031237                                    | 72.03480153                         | 0.001052238                               | 0.037382709                                        | 0.051750634                   |
| 0.001802167                                    | 249.4338757                         | 0.001811217                               | 0.020656417                                        | 0.037046499                   |
| 0.003057842                                    | 90.80740338                         | 0.003101415                               | 0.03430813                                         | 0.046877387                   |
| 0.0017337                                      | 110.3369323                         | 0.001757847                               | 0.030996491                                        | 0.030774827                   |
| 0.003197965                                    | 67.44493686                         | 0.003244977                               | 0.036672569                                        | 0.044157457                   |
| 0.002384689                                    | 68.82475687                         | 0.002442116                               | 0.035531032                                        | 0.052354138                   |
| 0.00349124                                     | 158.8181703                         | 0.003530726                               | 0.023375601                                        | 0.035195909                   |
| 0.001611674                                    | 161.7977838                         | 0.001634169                               | 0.024029732                                        | 0.034810827                   |
| 0.001848977                                    | 49.43418214                         | 0.001892699                               | 0.042344077                                        | 0.053265441                   |
| 0.00165462                                     | 54.20535604                         | 0.001692847                               | 0.041699809                                        | 0.055515461                   |
| 0.002848393                                    | 267.2743341                         | 0.002863674                               | 0.018561233                                        | 0.029065498                   |
| 0.019389111                                    | 37.08606439                         | 0.019962349                               | 0.017633422                                        | 0.048571929                   |
| 0.003252959                                    | 643.7535519                         | 0.003275417                               | 0.013049409                                        | 0.0215463                     |
| 0.001670835                                    | 48.62580858                         | 0.001724692                               | 0.043114176                                        | 0.074490149                   |
| 0.003523644                                    | 236.5839666                         | 0.0035782                                 | 0.019764607                                        | 0.040150084                   |
| 0.002229363                                    | 642.6349755                         | 0.002276894                               | 0.011326195                                        | 0.033615768                   |
| 0.002701567                                    | 183.8933447                         | 0.002718824                               | 0.02368412                                         | 0.034521681                   |
| 0.001292865                                    | 34.71105397                         | 0.001361809                               | 0.077154375                                        | 0.135114295                   |
| 0.00265692                                     | 134.5127868                         | 0.00268109                                | 0.0253498                                          | 0.027680224                   |
| 0.001320525                                    | 90.06604611                         | 0.001340142                               | 0.03277584                                         | 0.040284077                   |
| 0.001017712                                    | 1033.19242                          | 0.001020527                               | 0.01137431                                         | 0.024905073                   |
| 0.005720253                                    | 47.13229776                         | 0.005882799                               | 0.045234941                                        | 0.065722297                   |
| 0.007862548                                    | 40.75399711                         | 0.008088961                               | 0.044942384                                        | 0.052507493                   |
| 0.003562896                                    | 46.46217564                         | 0.003668694                               | 0.044407716                                        | 0.063558803                   |
| 0.000398576                                    | 325.4087982                         | 0.000403364                               | 0.017688441                                        | 0.034463602                   |
| 0.000856164                                    | 135.612108                          | 0.000871341                               | 0.029335218                                        | 0.056335157                   |
| 0.001000959                                    | 51.40117565                         | 0.001043342                               | 0.055833637                                        | 0.162217769                   |
| 0.010735832                                    | 42.63399105                         | 0.01086981                                | 0.046809751                                        | 0.042587738                   |
| 0.002090766                                    | 61.11648179                         | 0.002132376                               | 0.039536145                                        | 0.047124288                   |
| 0.0050447                                      | 47.6881375                          | 0.005064323                               | 0.01460647                                         | 0.021070125                   |
| 0.001705059                                    | 96.18328074                         | 0.001759959                               | 0.03512801                                         | 0.055944061                   |
| 0.005221266                                    | 72.19523771                         | 0.005288174                               | 0.034975426                                        | 0.047975574                   |
| 0.001276302                                    | 315.9875757                         | 0.001289665                               | 0.019086255                                        | 0.031185597                   |
| 0.002646597                                    | 60.84818302                         | 0.002713686                               | 0.03854252                                         | 0.054325935                   |
| 0.00457882                                     | 82.90207829                         | 0.00464199                                | 0.034174084                                        | 0.042596339                   |
| 0.002805966                                    | 29.28582478                         | 0.00292356                                | 0.063105335                                        | 0.115805514                   |
| 0.001371247                                    | 30.77608308                         | 0.001428327                               | 0.068193443                                        | 0.110444761                   |
| 0.000568709                                    | 161.9778131                         | 0.000583487                               | 0.027789842                                        | 0.058316605                   |
| 0.001979817                                    | 147.6070879                         | 0.001992947                               | 0.02403439                                         | 0.026473814                   |
| 0.002492761                                    | 290.4424085                         | 0.002515488                               | 0.01735718                                         | 0.027245782                   |
| 0.005627852                                    | 151.3869976                         | 0.005718765                               | 0.023917408                                        | 0.0325398                     |
| 0.001699116                                    | 224.6138146                         | 0.001727041                               | 0.020419231                                        | 0.034944431                   |
| 0.000752015                                    | 497.9822936                         | 0.000761388                               | 0.015041925                                        | 0.036128657                   |
| 0.00297288                                     | 119.8491025                         | 0.002995536                               | 0.02715164                                         | 0.034709398                   |
| 0.002921482                                    | 132.2598327                         | 0.002995336                               | 0.026257213                                        | 0.031423042                   |
| 0.00139113                                     | 326.8193564                         | 0.001407403                               | 0.018096352                                        | 0.032085907                   |
| 0.011438576                                    | 48.63781105                         | 0.01154861                                | 0.055132512                                        | 0.046890322                   |
| 0.003270742                                    | 28.04928488                         | 0.003402081                               | 0.060690023                                        | 0.080394096                   |
| 0.000452698                                    | 457.2745808                         | 0.000459545                               | 0.01420893                                         | 0.043035295                   |
| 0.00793965                                     | 57.73890719                         | 0.008143873                               | 0.040139654                                        | 0.041480822                   |
| 0.002075948                                    | 723.2699958                         | 0.002093621                               | 0.011753275                                        | 0.023837665                   |
| 0.011388067                                    | 28.93790815                         | 0.011537856                               | 0.058376107                                        | 0.052705043                   |
| 0.01238928                                     | 53.34795889                         | 0.012425431                               | 0.054684487                                        | 0.03080649                    |
| 0.00121617                                     | 75.70585062                         | 0.001255418                               | 0.044685819                                        | 0.101545828                   |
| 0.002735083                                    | 174.7336535                         | 0.002752618                               | 0.021839151                                        | 0.03321727                    |
| 0.003992361                                    | 284.979091                          | 0.004034933                               | 0.018266581                                        | 0.031890157                   |
| 0.001284845                                    | 66.66961982                         | 0.001325153                               | 0.03927303                                         | 0.072266376                   |
| 0.001811108                                    | 53.88119398                         | 0.001875345                               | 0.045412525                                        | 0.069196812                   |
| 0.018334785                                    | 41.01555679                         | 0.018719586                               | 0.050263468                                        | 0.04843052                    |
| 0.002008252                                    | 194.5044394                         | 0.002033008                               | 0.02066168                                         | 0.037742299                   |
| 0.011024888                                    | 77.68924275                         | 0.011084374                               | 0.044099514                                        | 0.034370657                   |
| 0.009271791                                    | 22.03025776                         | 0.009448975                               | 0.067040469                                        | 0.059423957                   |
| 0.003949882                                    | 46.95565615                         | 0.00401023                                | 0.058199418                                        | 0.10021926                    |

| wavelet.LLH_glrIm_GrayLevelNonUniformity | wavelet.LLH_glrIm_LongRunEmphasis | wavelet.LLH_glrIm_ShortRunHighGrayLevelEmphasis | wavelet.LLH_glrIm_RunLengthNonUniformity | wavelet.LLH_glrIm_ShortRunEmphasis |
|------------------------------------------|-----------------------------------|-------------------------------------------------|------------------------------------------|------------------------------------|
| 34.96158372                              | 1.1948703                         | 326.1296138                                     | 593.3148063                              | 0.956289904                        |
| 72.95612687                              | 1.253648017                       | 907.3171092                                     | 1703.325406                              | 0.951066032                        |
| 6.635919543                              | 1.060983328                       | 2144.863213                                     | 409.4457373                              | 0.985361805                        |
| 105.3793187                              | 1.141508189                       | 906.3181594                                     | 2320.16254                               | 0.968049215                        |
| 13.17860479                              | 1.131537158                       | 738.7717267                                     | 319.272059                               | 0.970368549                        |
| 21.74346533                              | 1.121681529                       | 1004.84757                                      | 573.4741648                              | 0.971171996                        |
| 6.528991303                              | 1.073845438                       | 3917.63635                                      | 314.4554495                              | 0.9823276                          |
| 20.43290984                              | 1.08637001                        | 1598.465436                                     | 922.6677734                              | 0.97920354                         |
| 74.87638498                              | 1.125942202                       | 1028.477337                                     | 1850.302873                              | 0.970692247                        |
| 40.332161                                | 1.105844571                       | 3441.713556                                     | 2804.255587                              | 0.975002243                        |
| 11.98759336                              | 1.097591067                       | 2504.062234                                     | 755.6897901                              | 0.977440203                        |
| 43.41924576                              | 1.139499739                       | 1602.938094                                     | 1303.876812                              | 0.967885377                        |
| 53.46294078                              | 1.10711189                        | 1784.348462                                     | 1879.986964                              | 0.975297476                        |
| 42.01393925                              | 1.160873819                       | 564.6640183                                     | 968.4192648                              | 0.963984186                        |
| 33.96218818                              | 1.131253059                       | 564.18045                                       | 807.1823592                              | 0.969188936                        |
| 735.0875836                              | 1.717399711                       | 598.7421653                                     | 4397.998511                              | 0.887774875                        |
| 22.74148875                              | 1.117225344                       | 987.0656227                                     | 627.7706062                              | 0.973287764                        |
| 99.89076184                              | 1.207708327                       | 787.9981525                                     | 1942.945992                              | 0.9542893                          |
| 22.66053642                              | 1.137097169                       | 547.77884                                       | 512.4832803                              | 0.967879266                        |
| 57.85524549                              | 1.218708297                       | 1933.829544                                     | 2364.269627                              | 0.958398354                        |
| 300.1608163                              | 1.279527212                       | 493.7216281                                     | 4178.833077                              | 0.944568793                        |
| 26.99777931                              | 1.093374303                       | 1926.910897                                     | 1575.696671                              | 0.97800282                         |
| 190.7387877                              | 1.334062725                       | 213.664849                                      | 2076.437517                              | 0.931326354                        |
| 7.910336214                              | 1.073806044                       | 1943.967024                                     | 449.1344181                              | 0.982835618                        |
| 22.47606291                              | 1.113812431                       | 1569.45053                                      | 1084.10441                               | 0.973740972                        |
| 14.97018525                              | 1.096915331                       | 1732.742839                                     | 635.8388827                              | 0.978143635                        |
| 37.32173727                              | 1.111497715                       | 4685.905981                                     | 3127.992176                              | 0.974327831                        |
| 19.08501889                              | 1.086939774                       | 6823.466533                                     | 1321.926655                              | 0.979672222                        |
| 22.38802233                              | 1.065554249                       | 2588.854173                                     | 1662.79692                               | 0.984913276                        |
| 108.0731397                              | 1.29012537                        | 1519.035732                                     | 2041.926024                              | 0.945779583                        |
| 33.43427508                              | 1.081591056                       | 7633.71465                                      | 2946.995804                              | 0.981044086                        |
| 169.8490619                              | 1.18360113                        | 1382.838949                                     | 5085.757224                              | 0.961834783                        |
| 71.19220099                              | 1.143565871                       | 1653.652381                                     | 1783.967441                              | 0.967317874                        |
| 3.572484062                              | 1.071558062                       | 1132.283595                                     | 97.48368481                              | 0.983828519                        |
| 8.086898518                              | 1.081841238                       | 1793.27114                                      | 307.6015972                              | 0.98086778                         |
| 71.93302308                              | 1.142085873                       | 900.4508217                                     | 1777.837338                              | 0.967981867                        |
| 41.37210693                              | 1.106250448                       | 4569.098757                                     | 2612.747586                              | 0.975665108                        |
| 119.8821774                              | 1.146400833                       | 1684.953558                                     | 2945.870482                              | 0.967558879                        |
| 16.67159864                              | 1.10830945                        | 3897.347419                                     | 756.141379                               | 0.974966242                        |
| 34.53321069                              | 1.13348085                        | 952.1175583                                     | 930.5442997                              | 0.970067592                        |
| 43.78632346                              | 1.135461333                       | 1525.326624                                     | 1300.897071                              | 0.968728182                        |
| 33.53254294                              | 1.131106086                       | 916.9514055                                     | 843.6095775                              | 0.969256513                        |
| 55.63935086                              | 1.152854442                       | 914.1213187                                     | 1429.466349                              | 0.965086018                        |
| 23.16905609                              | 1.104932812                       | 1282.69419                                      | 927.7413544                              | 0.974942221                        |
| 43.68637881                              | 1.102403403                       | 1575.576298                                     | 1706.865006                              | 0.975973038                        |
| 90.03281464                              | 1.152283978                       | 889.4573387                                     | 1945.155459                              | 0.965915077                        |
| 169.5515644                              | 1.157477663                       | 1005.54206                                      | 3714.089784                              | 0.965259552                        |
| 10.52735627                              | 1.086170885                       | 2281.501894                                     | 537.4736528                              | 0.979523882                        |
| 9.197163335                              | 1.141934573                       | 336.8125625                                     | 118.2251073                              | 0.968035394                        |
| 6.356287436                              | 1.063225176                       | 4498.827229                                     | 468.4997532                              | 0.985083025                        |
| 138.8805327                              | 1.205316851                       | 907.9216444                                     | 2873.946405                              | 0.956384106                        |
| 15.73266904                              | 1.119875744                       | 1365.149299                                     | 738.3141925                              | 0.971499207                        |
| 41.985694                                | 1.096403567                       | 4070.32613                                      | 3497.601498                              | 0.977888275                        |
| 13.53975488                              | 1.103668845                       | 2108.767428                                     | 535.4967154                              | 0.97510461                         |
| 457.8360466                              | 1.34981081                        | 972.8192614                                     | 5011.965302                              | 0.934532965                        |
| 21.69731201                              | 1.082606123                       | 1398.043484                                     | 812.2693792                              | 0.980156035                        |
| 69.28373497                              | 1.117250962                       | 1612.619855                                     | 1968.28443                               | 0.972833875                        |
| 14.36793381                              | 1.072936749                       | 10238.82439                                     | 1207.160418                              | 0.982788359                        |
| 34.8257768                               | 1.185403862                       | 589.7453589                                     | 693.1623754                              | 0.959677646                        |
| 37.75490341                              | 1.154106736                       | 315.749483                                      | 766.7120643                              | 0.964746023                        |
| 89.04466829                              | 1.181372758                       | 507.2639944                                     | 1806.357607                              | 0.959945107                        |
| 93.90571305                              | 1.099517864                       | 5801.40478                                      | 4998.111397                              | 0.977066379                        |
| 86.45677684                              | 1.157086902                       | 2497.705342                                     | 2696.269508                              | 0.965907591                        |
| 136.9471722                              | 1.407214519                       | 1686.279704                                     | 2032.796575                              | 0.927489282                        |
| 9.754547064                              | 1.127422448                       | 363.5488856                                     | 192.469142                               | 0.969794018                        |
| 58.89603148                              | 1.135159392                       | 936.6392427                                     | 1376.426651                              | 0.969618672                        |
| 5.63600365                               | 1.064353724                       | 2809.477863                                     | 370.1736413                              | 0.984133569                        |
| 107.0500776                              | 1.157121116                       | 1217.204415                                     | 2784.745918                              | 0.965584193                        |
| 14.9358158                               | 1.140329669                       | 728.3644411                                     | 392.8531484                              | 0.967894142                        |
| 37.2790583                               | 1.091517352                       | 2562.446344                                     | 1845.484163                              | 0.978483209                        |
| 111.7588591                              | 1.154723064                       | 707.3438464                                     | 2651.17942                               | 0.965638601                        |
| 37.11773335                              | 1.12353739                        | 747.3704122                                     | 1008.196871                              | 0.971627946                        |
| 300.1631989                              | 1.301448997                       | 531.2965505                                     | 4101.172499                              | 0.942392207                        |
| 420.9239336                              | 1.298258066                       | 1031.815319                                     | 5290.422944                              | 0.940443996                        |
| 242.5563965                              | 1.16538099                        | 2927.116669                                     | 7932.28657                               | 0.963488645                        |
| 26.14178547                              | 1.079410921                       | 1852.634436                                     | 1033.842928                              | 0.980775549                        |
| 18.90331346                              | 1.079475347                       | 2076.971106                                     | 1037.125458                              | 0.981393228                        |
| 14.13305078                              | 1.098632614                       | 951.752255                                      | 554.8648302                              | 0.976072997                        |
| 34.8937975                               | 1.100931762                       | 2422.289996                                     | 1607.746664                              | 0.976761475                        |
| 41.40063735                              | 1.105634553                       | 4413.194826                                     | 2579.462906                              | 0.9753711                          |
| 13.24329569                              | 1.103064727                       | 1651.783367                                     | 457.6726721                              | 0.975659313                        |
| 34.19046941                              | 1.092332767                       | 1651.887117                                     | 1229.998279                              | 0.978301688                        |
| 49.05282971                              | 1.093284688                       | 2915.68733                                      | 2559.825586                              | 0.978267534                        |
| 7.665381638                              | 1.13657079                        | 523.0594088                                     | 128.2945832                              | 0.969000346                        |
| 192.2442587                              | 1.227706235                       | 443.6922512                                     | 2786.143993                              | 0.950801685                        |
| 74.77709003                              | 1.126049768                       | 6208.698658                                     | 4872.231659                              | 0.97074355                         |
| 30.03240104                              | 1.123358289                       | 413.4262716                                     | 693.568375                               | 0.970997572                        |
| 17.83970731                              | 1.069545733                       | 3369.716855                                     | 1453.513055                              | 0.983586279                        |
| 10.18571018                              | 1.154993295                       | 310.1146945                                     | 159.3534307                              | 0.96472954                         |
| 5.574528997                              | 1.093667906                       | 674.3660733                                     | 96.1816543                               | 0.977464158                        |
| 164.9751865                              | 1.263189342                       | 1425.979385                                     | 3233.307931                              | 0.94897725                         |
| 14.95276158                              | 1.096950861                       | 1801.115897                                     | 645.1009125                              | 0.977345611                        |
| 18.11636719                              | 1.094070832                       | 2051.053868                                     | 935.3955046                              | 0.977786077                        |
| 151.2723346                              | 1.20094795                        | 1210.120608                                     | 3442.245543                              | 0.956995287                        |
| 248.4446533                              | 1.196309537                       | 802.3214377                                     | 4887.47061                               | 0.956968586                        |
| 12.14112884                              | 1.146910465                       | 338.0875757                                     | 220.5160501                              | 0.965103652                        |
| 24.27181979                              | 1.109528031                       | 1759.637929                                     | 1098.854111                              | 0.97467219                         |
| 5.244710833                              | 1.104619835                       | 666.0528376                                     | 111.2352367                              | 0.974557292                        |
| 24.05855821                              | 1.176207277                       | 269.5394635                                     | 323.0023838                              | 0.959552575                        |
| 43.42235185                              | 1.273782147                       | 919.6380302                                     | 646.1649424                              | 0.944283753                        |

| wavelet.LLH_glrIm_LongRunHighGrayLevelEmphasis | wavelet.LLH_glrIm_RunPercentage | wavelet.LLH_glrIm_LongRunLowGrayLevelEmphasis | wavelet.LLH_glrIm_RunEntropy | wavelet.LLH_glrIm_HighGrayLevelRunEmphasis |
|------------------------------------------------|---------------------------------|-----------------------------------------------|------------------------------|--------------------------------------------|
| 400.768217                                     | 0.942035302                     | 0.008864866                                   | 4.865393881                  | 339.8820167                                |
| 1178.252674                                    | 0.930669234                     | 0.004103621                                   | 5.49549821                   | 951.380676                                 |
| 2358.941561                                    | 0.980503368                     | 0.011434441                                   | 6.203003906                  | 2186.437044                                |
| 1065.113829                                    | 0.95711575                      | 0.002265223                                   | 5.143310278                  | 935.6763089                                |
| 870.3638071                                    | 0.960145704                     | 0.00580029                                    | 5.122234946                  | 762.7151177                                |
| 1150.15111                                     | 0.962076803                     | 0.00412717                                    | 5.261958404                  | 1032.666374                                |
| 4292.890081                                    | 0.976717644                     | 0.003448807                                   | 5.944337799                  | 3990.620152                                |
| 1764.472315                                    | 0.972593275                     | 0.002668229                                   | 5.905221086                  | 1630.999905                                |
| 1187.370032                                    | 0.961112961                     | 0.003503128                                   | 5.284213655                  | 1058.559256                                |
| 3876.594858                                    | 0.966852063                     | 0.001218287                                   | 6.623861944                  | 3524.828413                                |
| 2783.272512                                    | 0.969677239                     | 0.004407227                                   | 6.362579699                  | 2558.669513                                |
| 1883.077954                                    | 0.957230354                     | 0.00164561                                    | 5.524067835                  | 1655.364765                                |
| 2021.427429                                    | 0.96695349                      | 0.001400638                                   | 5.680574871                  | 1828.728741                                |
| 672.3303112                                    | 0.951837072                     | 0.006558151                                   | 5.187403082                  | 584.5415324                                |
| 655.0580921                                    | 0.959638605                     | 0.006949122                                   | 5.124800943                  | 581.5004763                                |
| 1139.136369                                    | 0.842256204                     | 0.002941662                                   | 4.344211645                  | 672.1510491                                |
| 1134.2723                                      | 0.964183381                     | 0.00352495                                    | 5.258637983                  | 1014.218625                                |
| 985.0002609                                    | 0.938943132                     | 0.002416705                                   | 5.11409129                   | 823.740032                                 |
| 639.396976                                     | 0.957705525                     | 0.005457524                                   | 5.058645025                  | 565.1569224                                |
| 2392.62104                                     | 0.94021366                      | 0.00146835                                    | 6.135414992                  | 2008.667896                                |
| 662.411274                                     | 0.923562846                     | 0.003720025                                   | 4.790254847                  | 521.6750139                                |
| 3245.330585                                    | 0.970706619                     | 0.001535314                                   | 6.300264659                  | 2980.182582                                |
| 297.124074                                     | 0.908486607                     | 0.009105353                                   | 4.488198448                  | 227.9072011                                |
| 2077.981297                                    | 0.976811131                     | 0.00390556                                    | 6.151431897                  | 1969.603361                                |
| 1773.356063                                    | 0.964796831                     | 0.002961598                                   | 6.067662152                  | 1607.842744                                |
| 1920.932993                                    | 0.970183995                     | 0.002819547                                   | 5.899158138                  | 1767.473631                                |
| 5282.560669                                    | 0.965533313                     | 0.001446635                                   | 6.806606013                  | 4799.302425                                |
| 7733.287365                                    | 0.972838048                     | 0.002640075                                   | 6.596065531                  | 6996.451215                                |
| 2739.155576                                    | 0.979646982                     | 0.0039461                                     | 6.61606115                   | 2617.141329                                |
| 2074.526648                                    | 0.923076923                     | 0.001457452                                   | 5.361670398                  | 1606.244883                                |
| 8505.78564                                     | 0.974447698                     | 0.000615768                                   | 6.805248809                  | 7797.342443                                |
| 1675.826016                                    | 0.947204566                     | 0.001412664                                   | 5.615503581                  | 1433.985877                                |
| 1940.676945                                    | 0.956260169                     | 0.001392537                                   | 5.362358889                  | 1706.952666                                |
| 1233.366595                                    | 0.977810651                     | 0.014484682                                   | 5.10078741                   | 1150.1437                                  |
| 1981.536975                                    | 0.974281742                     | 0.004472186                                   | 6.658043203                  | 1829.164143                                |
| 1060.008685                                    | 0.957083016                     | 0.002340947                                   | 5.248615661                  | 929.8364876                                |
| 5161.63976                                     | 0.967174145                     | 0.000867974                                   | 6.558150729                  | 4678.696411                                |
| 1988.857681                                    | 0.956079996                     | 0.001146508                                   | 5.328547965                  | 1740.161276                                |
| 4505.719533                                    | 0.966559189                     | 0.001850587                                   | 5.984540386                  | 4011.855482                                |
| 1099.091959                                    | 0.959521889                     | 0.003294987                                   | 5.415643666                  | 979.2211724                                |
| 1790.668175                                    | 0.958355078                     | 0.001860895                                   | 5.544479005                  | 1574.713157                                |
| 1065.771927                                    | 0.959480184                     | 0.003442908                                   | 5.240985595                  | 945.1017718                                |
| 1083.207348                                    | 0.953668135                     | 0.002692611                                   | 5.320618553                  | 945.5210494                                |
| 1454.684042                                    | 0.966979362                     | 0.003694913                                   | 5.780577322                  | 1315.928238                                |
| 1768.752826                                    | 0.968051118                     | 0.001729067                                   | 5.827303306                  | 1612.263486                                |
| 1054.216879                                    | 0.954288082                     | 0.002089044                                   | 5.081156222                  | 919.6466563                                |
| 1203.494975                                    | 0.95306358                      | 0.00186502                                    | 5.159420811                  | 1041.416364                                |
| 2564.795402                                    | 0.972819633                     | 0.002929161                                   | 6.015908219                  | 2336.49535                                 |
| 398.995937                                     | 0.957520092                     | 0.022280988                                   | 4.431894824                  | 348.1234714                                |
| 4882.484381                                    | 0.98003405                      | 0.003366446                                   | 6.566321953                  | 4572.993972                                |
| 1137.213965                                    | 0.940690151                     | 0.001975135                                   | 5.141032829                  | 948.1757215                                |
| 1596.465996                                    | 0.962515115                     | 0.003804932                                   | 6.027711875                  | 1409.451279                                |
| 4551.259294                                    | 0.970144474                     | 0.002470603                                   | 6.76498434                   | 4160.43407                                 |
| 2377.256773                                    | 0.96733047                      | 0.002790898                                   | 5.830999668                  | 2161.034575                                |
| 1387.001644                                    | 0.908831472                     | 0.001727796                                   | 4.783601897                  | 1038.340553                                |
| 1545.417698                                    | 0.97374639                      | 0.002780229                                   | 5.63788902                   | 1426.509458                                |
| 1850.885192                                    | 0.963871058                     | 0.001424106                                   | 5.445174155                  | 1657.432736                                |
| 11321.21392                                    | 0.976917128                     | 0.001032424                                   | 6.836299997                  | 10445.31838                                |
| 723.8968744                                    | 0.945662446                     | 0.006575748                                   | 5.029384013                  | 613.6361552                                |
| 370.3645813                                    | 0.953549288                     | 0.009093159                                   | 4.900493867                  | 326.0436789                                |
| 617.2287324                                    | 0.946273641                     | 0.004145121                                   | 5.058399408                  | 527.1266365                                |
| 6499.469998                                    | 0.969107198                     | 0.000424066                                   | 6.313889105                  | 5932.408637                                |
| 2981.286069                                    | 0.953572318                     | 0.000940833                                   | 5.749780436                  | 2584.253706                                |
| 2535.840607                                    | 0.897304453                     | 0.001281535                                   | 5.170235915                  | 1815.839437                                |
| 393.0883924                                    | 0.960297767                     | 0.011430722                                   | 4.794372437                  | 347.3667594                                |
| 1120.468936                                    | 0.959185695                     | 0.002314654                                   | 5.187732746                  | 992.3991783                                |
| 3055.424431                                    | 0.979304959                     | 0.005143398                                   | 6.32493468                   | 2858.397047                                |
| 1439.328365                                    | 0.953177258                     | 0.001999833                                   | 5.462004742                  | 1257.373684                                |
| 861.8286961                                    | 0.957399103                     | 0.005569259                                   | 5.216336106                  | 752.9306493                                |
| 2837.611062                                    | 0.97123513                      | 0.001347092                                   | 6.190930374                  | 2615.420553                                |
| 837.7863359                                    | 0.953770243                     | 0.003011803                                   | 5.238602163                  | 731.1431859                                |
| 855.9317168                                    | 0.962049465                     | 0.004913006                                   | 5.369524414                  | 767.6310189                                |
| 730.2172328                                    | 0.919861872                     | 0.003528782                                   | 4.801187854                  | 563.2187554                                |
| 1428.040444                                    | 0.918701608                     | 0.00171284                                    | 4.780323158                  | 1097.807282                                |
| 3544.566261                                    | 0.950695492                     | 0.000649026                                   | 5.865685566                  | 3038.308318                                |
| 2048.841303                                    | 0.974634684                     | 0.002047672                                   | 5.726031225                  | 1891.098988                                |
| 2262.519711                                    | 0.975001722                     | 0.002615409                                   | 6.176026731                  | 2112.107827                                |
| 1062.986437                                    | 0.968726356                     | 0.006087737                                   | 5.709224942                  | 973.2077228                                |
| 2721.579298                                    | 0.968733647                     | 0.001843011                                   | 6.053067649                  | 2478.546194                                |
| 4929.23888                                     | 0.967079302                     | 0.000801259                                   | 6.562440005                  | 4510.915947                                |
| 1861.894115                                    | 0.967796093                     | 0.003089796                                   | 5.54633896                   | 1691.927239                                |
| 1837.670701                                    | 0.971031951                     | 0.003324562                                   | 5.671961379                  | 1687.281809                                |
| 3244.9639                                      | 0.970850782                     | 0.00147543                                    | 6.243586864                  | 2977.674366                                |
| 615.9481523                                    | 0.95862069                      | 0.012009439                                   | 4.695727887                  | 540.0824407                                |
| 564.9001535                                    | 0.934056212                     | 0.004004342                                   | 4.74593131                   | 465.3452664                                |
| 7224.793666                                    | 0.961032758                     | 0.000488682                                   | 6.614916749                  | 6400.305808                                |
| 472.8025967                                    | 0.961736207                     | 0.008987044                                   | 5.057788088                  | 424.7489191                                |
| 3663.838915                                    | 0.977993656                     | 0.002169056                                   | 6.671694158                  | 3426.510655                                |
| 379.0544404                                    | 0.95334174                      | 0.012177638                                   | 4.514919655                  | 322.8999793                                |
| 758.8702074                                    | 0.970695971                     | 0.012574868                                   | 4.586923762                  | 690.7530222                                |
| 1877.793455                                    | 0.928417997                     | 0.001455434                                   | 5.364307644                  | 1499.631388                                |
| 2027.238915                                    | 0.969819133                     | 0.002826408                                   | 5.822067453                  | 1843.564017                                |
| 2319.247972                                    | 0.970419991                     | 0.004208585                                   | 6.107365009                  | 2101.948379                                |
| 1507.770462                                    | 0.94165883                      | 0.00151136                                    | 5.333426527                  | 1262.543534                                |
| 993.3597805                                    | 0.942208326                     | 0.002167056                                   | 5.158633507                  | 836.8259977                                |
| 398.4397301                                    | 0.954697476                     | 0.020285037                                   | 4.786138499                  | 349.7295892                                |
| 2005.27595                                     | 0.966029858                     | 0.002141689                                   | 5.956506277                  | 1805.7759                                  |
| 733.8972804                                    | 0.966854284                     | 0.011331112                                   | 4.894535907                  | 679.4371107                                |
| 332.0336261                                    | 0.946823625                     | 0.010209872                                   | 4.440969197                  | 281.1646613                                |
| 1251.612325                                    | 0.92431608                      | 0.004301085                                   | 4.93641493                   | 975.4074581                                |

| wavelet.LLH_glrIm_RunLengthNonUniformityNormalized | wavelet.LLH_glszm_GrayLevelVariance | wavelet.LLH_glszm_SmallAreaHighGrayLevelEmphasis | wavelet.LLH_glszm_GrayLevelNonUniformityNormalized |
|----------------------------------------------------|-------------------------------------|--------------------------------------------------|----------------------------------------------------|
| 0.89162117                                         | 52.94261644                         | 259.2072033                                      | 0.040479733                                        |
| 0.880614412                                        | 119.1934527                         | 714.921811                                       | 0.026276924                                        |
| 0.96204023                                         | 376.9794206                         | 1591.827121                                      | 0.015549812                                        |
| 0.9195636                                          | 71.06226141                         | 719.3257362                                      | 0.034502928                                        |
| 0.925607687                                        | 79.14497599                         | 523.0048285                                      | 0.034293553                                        |
| 0.926755568                                        | 84.96063489                         | 792.6892002                                      | 0.032642649                                        |
| 0.954789297                                        | 294.923456                          | 3161.273666                                      | 0.019008                                           |
| 0.946533782                                        | 201.4630724                         | 1270.152497                                      | 0.020794907                                        |
| 0.925704751                                        | 88.76032854                         | 784.9204219                                      | 0.031312977                                        |
| 0.936061442                                        | 525.0920298                         | 2748.541277                                      | 0.0126655                                          |
| 0.942196776                                        | 430.8589689                         | 1987.485721                                      | 0.014407574                                        |
| 0.918876739                                        | 114.7462892                         | 1241.108726                                      | 0.027676155                                        |
| 0.937088556                                        | 142.4622952                         | 1391.17593                                       | 0.02472664                                         |
| 0.909659776                                        | 69.91728115                         | 431.5117823                                      | 0.035179966                                        |
| 0.922491479                                        | 64.89186543                         | 447.5160829                                      | 0.035770737                                        |
| 0.748976395                                        | 32.74792785                         | 461.5000875                                      | 0.05385031                                         |
| 0.93231572                                         | 83.25904956                         | 740.3759598                                      | 0.031311054                                        |
| 0.886948748                                        | 66.62964347                         | 587.5264089                                      | 0.034786801                                        |
| 0.919008217                                        | 60.51889788                         | 400.7335184                                      | 0.037777616                                        |
| 0.89741633                                         | 290.0928848                         | 1562.991997                                      | 0.017859767                                        |
| 0.865470158                                        | 45.92020734                         | 390.4577951                                      | 0.04184237                                         |
| 0.943560867                                        | 342.9899326                         | 2418.653459                                      | 0.015382464                                        |
| 0.835977073                                        | 25.04196984                         | 159.5898133                                      | 0.0584809                                          |
| 0.955767801                                        | 336.2686251                         | 1804.189289                                      | 0.016689029                                        |
| 0.933097397                                        | 248.433589                          | 1337.566071                                      | 0.018062722                                        |
| 0.944170366                                        | 250.7750481                         | 1487.47853                                       | 0.019993318                                        |
| 0.934534538                                        | 730.8779787                         | 3864.403961                                      | 0.010658777                                        |
| 0.947918643                                        | 808.2900391                         | 5109.61418                                       | 0.012400359                                        |
| 0.961261267                                        | 780.8755913                         | 2474.196419                                      | 0.012055746                                        |
| 0.869132644                                        | 110.687459                          | 1248.451957                                      | 0.028306052                                        |
| 0.951157736                                        | 808.110551                          | 5925.614592                                      | 0.01060597                                         |
| 0.905026864                                        | 117.5135661                         | 1084.798646                                      | 0.026093249                                        |
| 0.917474866                                        | 104.6660667                         | 1292.685523                                      | 0.029885333                                        |
| 0.958430347                                        | 124.5297973                         | 1023.265604                                      | 0.032159732                                        |
| 0.950814235                                        | 179.1421719                         | 1416.67909                                       | 0.023966667                                        |
| 0.919226888                                        | 76.2906351                          | 698.6057506                                      | 0.032583731                                        |
| 0.937855068                                        | 532.3970512                         | 3762.787236                                      | 0.013622306                                        |
| 0.9183442                                          | 93.00251711                         | 1352.901014                                      | 0.030033558                                        |
| 0.936422766                                        | 254.7867647                         | 2841.721812                                      | 0.020065149                                        |
| 0.924283398                                        | 114.6648639                         | 740.4612827                                      | 0.029005556                                        |
| 0.920771568                                        | 141.6201434                         | 1211.566704                                      | 0.027140214                                        |
| 0.92221906                                         | 79.79543868                         | 680.5397071                                      | 0.033084977                                        |
| 0.912376015                                        | 82.73770337                         | 711.3786363                                      | 0.031881412                                        |
| 0.935850131                                        | 171.6158689                         | 986.944567                                       | 0.021757428                                        |
| 0.938602075                                        | 176.1387728                         | 1250.420214                                      | 0.022487297                                        |
| 0.914413278                                        | 61.55066532                         | 674.0387969                                      | 0.036426695                                        |
| 0.91300749                                         | 70.38257103                         | 764.49197                                        | 0.034267957                                        |
| 0.947417467                                        | 263.5555556                         | 1699.178993                                      | 0.018369534                                        |
| 0.920221862                                        | 38.15702909                         | 236.0977369                                      | 0.056786704                                        |
| 0.961558642                                        | 645.0244315                         | 3798.219113                                      | 0.012232274                                        |
| 0.891948121                                        | 64.08889329                         | 650.5316013                                      | 0.035345305                                        |
| 0.927364917                                        | 234.1218481                         | 907.2319476                                      | 0.020083585                                        |
| 0.943372362                                        | 651.5059689                         | 3325.62662                                       | 0.010937253                                        |
| 0.936425229                                        | 202.2205428                         | 1634.777034                                      | 0.02204086                                         |
| 0.844039565                                        | 60.56224619                         | 753.6336309                                      | 0.04067179                                         |
| 0.948844065                                        | 144.0918509                         | 1142.636992                                      | 0.024040976                                        |
| 0.930876092                                        | 111.0910647                         | 1254.780809                                      | 0.02831303                                         |
| 0.955550633                                        | 1057.414996                         | 8137.907798                                      | 0.010384115                                        |
| 0.899840762                                        | 60.6884198                          | 456.1739054                                      | 0.037577778                                        |
| 0.911807633                                        | 45.79872941                         | 251.040458                                       | 0.041537827                                        |
| 0.900354385                                        | 60.7267746                          | 400.5004196                                      | 0.036094331                                        |
| 0.941327349                                        | 359.100918                          | 4800.713115                                      | 0.016002275                                        |
| 0.914593294                                        | 168.3362049                         | 1950.492704                                      | 0.023321887                                        |
| 0.828629043                                        | 79.94593225                         | 1296.167178                                      | 0.032456736                                        |
| 0.923377472                                        | 53.71686823                         | 271.2214144                                      | 0.041068279                                        |
| 0.923466869                                        | 75.16253516                         | 745.9241141                                      | 0.033377811                                        |
| 0.959033641                                        | 478.5442892                         | 2326.840581                                      | 0.01414973                                         |
| 0.91359537                                         | 120.718695                          | 973.6510654                                      | 0.029002428                                        |
| 0.919348464                                        | 81.12232621                         | 515.9234179                                      | 0.032208363                                        |
| 0.944749379                                        | 349.4821807                         | 2127.45904                                       | 0.017846449                                        |
| 0.91385052                                         | 77.00163651                         | 553.7232226                                      | 0.03264935                                         |
| 0.927978152                                        | 96.54109143                         | 608.3689077                                      | 0.030722254                                        |
| 0.861334162                                        | 44.84953814                         | 391.4656832                                      | 0.043505671                                        |
| 0.856396216                                        | 49.36085064                         | 734.2067265                                      | 0.043413159                                        |
| 0.908580861                                        | 203.2373556                         | 2243.199648                                      | 0.022363258                                        |
| 0.950362428                                        | 159.3000545                         | 1481.442565                                      | 0.023137318                                        |
| 0.952127464                                        | 293.3666782                         | 1796.278942                                      | 0.017182752                                        |
| 0.938705018                                        | 151.7892645                         | 772.0979616                                      | 0.023246275                                        |
| 0.940625632                                        | 234.1402711                         | 1879.095923                                      | 0.019700788                                        |
| 0.937055005                                        | 559.0423319                         | 3820.34059                                       | 0.013081279                                        |
| 0.937919311                                        | 127.3254454                         | 1299.605052                                      | 0.026703398                                        |
| 0.944385286                                        | 146.1994954                         | 1368.229093                                      | 0.024162849                                        |
| 0.944235084                                        | 372.7236412                         | 2415.049888                                      | 0.017260499                                        |
| 0.922233805                                        | 59.64559786                         | 378.9409798                                      | 0.044021416                                        |
| 0.879118014                                        | 40.35123352                         | 331.5976674                                      | 0.044224632                                        |
| 0.925675598                                        | 483.7290528                         | 4664.752553                                      | 0.013294954                                        |
| 0.926535859                                        | 60.90658631                         | 322.5597827                                      | 0.036661084                                        |
| 0.957511059                                        | 171.283797                          | 2817.549589                                      | 0.011230623                                        |
| 0.912330023                                        | 34.29575163                         | 200.2993288                                      | 0.05017301                                         |
| 0.942801779                                        | 66.96244898                         | 490.6521865                                      | 0.047346939                                        |
| 0.87556034                                         | 102.6568943                         | 1105.483988                                      | 0.030895079                                        |
| 0.941948422                                        | 186.0295083                         | 1469.515145                                      | 0.021223668                                        |
| 0.943002382                                        | 273.9669647                         | 1564.150037                                      | 0.018067586                                        |
| 0.893390288                                        | 89.84161007                         | 928.8265422                                      | 0.031230296                                        |
| 0.893125406                                        | 72.51073964                         | 618.3090419                                      | 0.03460905                                         |
| 0.912304717                                        | 54.8915145                          | 257.6181355                                      | 0.040081407                                        |
| 0.935326685                                        | 207.2576799                         | 1324.419294                                      | 0.019870968                                        |
| 0.935040737                                        | 97.149375                           | 627.0649757                                      | 0.0359375                                          |
| 0.899433246                                        | 30.33876543                         | 177.7848652                                      | 0.054567901                                        |
| 0.86509894                                         | 80.30878291                         | 716.9338651                                      | 0.034942923                                        |

| wavelet.LLH_glszm_SizeZoneNonUniformityNormalized | wavelet.LLH_glszm_SizeZoneNonUniformity | wavelet.LLH_glszm_GrayLevelNonUniformity | wavelet.LLH_glszm_LargeAreaEmphasis | wavelet.LLH_glszm_ZoneVariance |
|---------------------------------------------------|-----------------------------------------|------------------------------------------|-------------------------------------|--------------------------------|
| 0.413751244                                       | 136.9516616                             | 13.39879154                              | 15.14199396                         | 10.59260138                    |
| 0.514292074                                       | 547.2067669                             | 27.95864662                              | 47.04981203                         | 43.23924385                    |
| 0.65055995                                        | 220.539823                              | 5.271386431                              | 2.017699115                         | 0.37869493                     |
| 0.536680228                                       | 829.7076326                             | 53.34152652                              | 9.763906856                         | 6.858932788                    |
| 0.50210048                                        | 108.4537037                             | 7.407407407                              | 4.625                               | 1.862632888                    |
| 0.498633382                                       | 195.4642857                             | 12.79591837                              | 4.293367347                         | 1.602763172                    |
| 0.630752                                          | 157.688                                 | 4.752                                    | 2.428                               | 0.610896                       |
| 0.565801664                                       | 388.1399417                             | 14.26530612                              | 3.174927114                         | 1.041453816                    |
| 0.484317093                                       | 588.4452675                             | 38.04526749                              | 5.350612784                         | 2.422716049                    |
| 0.535933                                          | 1071.866                                | 25.331                                   | 4.079                               | 1.679599                       |
| 0.564079341                                       | 314.7562724                             | 8.039426523                              | 3.431899642                         | 1.235341915                    |
| 0.490874735                                       | 416.7526502                             | 23.49705536                              | 5.863368669                         | 2.816308523                    |
| 0.543600408                                       | 718.0961393                             | 32.66389099                              | 4.340651022                         | 1.875679712                    |
| 0.440464782                                       | 261.1956155                             | 20.86172007                              | 8.741989882                         | 5.187525061                    |
| 0.490922036                                       | 260.1886792                             | 18.95849057                              | 5.367924528                         | 2.413417586                    |
| 0.395535892                                       | 643.9324324                             | 87.66830467                              | 2906.197174                         | 2887.988187                    |
| 0.495013129                                       | 207.4105012                             | 13.11933174                              | 4.787589499                         | 2.012462905                    |
| 0.421070548                                       | 450.1244153                             | 37.18709074                              | 34.01496726                         | 29.25612092                    |
| 0.420997242                                       | 139.7710843                             | 12.54216867                              | 4.63253012                          | 1.559478879                    |
| 0.492884963                                       | 745.2420635                             | 27.00396825                              | 20.78505291                         | 17.35324765                    |
| 0.472243165                                       | 1066.325066                             | 94.48007086                              | 236.5872453                         | 231.2347233                    |
| 0.587200112                                       | 695.2449324                             | 6.9254283784                             | 18.21283784                         | 1.097425128                    |
| 0.327281557                                       | 279.825731                              | 50.00116959                              | 107.1070602                         | 96.96815294                    |
| 0.635148177                                       | 226.7478992                             | 5.957983193                              | 2.428571429                         | 0.613249221                    |
| 0.561557682                                       | 434.084088                              | 13.96248383                              | 4.688227684                         | 2.262209868                    |
| 0.57156234                                        | 263.4902386                             | 9.21691974                               | 3.700650759                         | 1.43435237                     |
| 0.555707674                                       | 1238.116697                             | 23.74775583                              | 4.439856373                         | 2.019729273                    |
| 0.602787795                                       | 611.2268245                             | 12.5739645                               | 3.010848126                         | 1.013671518                    |
| 0.63477253                                        | 849.9604182                             | 16.14264376                              | 2.235250187                         | 0.497736375                    |
| 0.539127451                                       | 674.4484412                             | 35.4108713                               | 80.19984013                         | 76.07092008                    |
| 0.597216107                                       | 1350.305617                             | 2.822202565                              | 23.9800973                          | 0.845324279                    |
| 0.501877196                                       | 1632.606517                             | 84.8813403                               | 17.61266523                         | 14.28958169                    |
| 0.491492552                                       | 564.2334495                             | 34.30836237                              | 6.795296167                         | 3.659188378                    |
| 0.715896967                                       | 57.98765432                             | 2.604938272                              | 2.296296296                         | 0.647767109                    |
| 0.610756114                                       | 145.9707113                             | 5.728033473                              | 2.694560669                         | 0.764902575                    |
| 0.493471499                                       | 568.4791667                             | 37.53645833                              | 5.895833333                         | 2.821168499                    |
| 0.556158839                                       | 1038.904711                             | 25.44646681                              | 3.988226998                         | 1.611211478                    |
| 0.533092969                                       | 1028.86943                              | 57.96476684                              | 10.94818653                         | 7.92815485                     |
| 0.543604022                                       | 295.7205882                             | 10.91544118                              | 3.884191176                         | 1.528191906                    |
| 0.488661111                                       | 293.1966667                             | 17.40333333                              | 6.155                               | 3.098330556                    |
| 0.520743286                                       | 451.4844291                             | 23.53056517                              | 5.803921569                         | 2.913529398                    |
| 0.481288856                                       | 267.1153153                             | 18.36216216                              | 5.331531532                         | 2.383040338                    |
| 0.466983025                                       | 422.1526549                             | 28.82079646                              | 7.488938053                         | 4.189731968                    |
| 0.517109484                                       | 338.1896024                             | 14.2293578                               | 3.845565749                         | 1.389204519                    |
| 0.545493378                                       | 668.2293878                             | 37.94285714                              | 3.794285714                         | 1.444008996                    |
| 0.478516425                                       | 591.9248181                             | 45.05982215                              | 7.983831851                         | 4.739756197                    |
| 0.492506084                                       | 1177.08954                              | 81.90041841                              | 14.10711297                         | 10.92111203                    |
| 0.583462092                                       | 239.8029197                             | 7.549878345                              | 2.761551778                         | 0.749439087                    |
| 0.451869806                                       | 34.34210526                             | 4.315789474                              | 6.157894737                         | 3.049168975                    |
| 0.682819966                                       | 265.6169666                             | 4.758354756                              | 2.197943445                         | 0.56559235                     |
| 0.417347135                                       | 698.2217573                             | 59.13269576                              | 19.24566647                         | 15.05700145                    |
| 0.461627643                                       | 231.2754491                             | 10.06187625                              | 4.073852295                         | 1.349046418                    |
| 0.595343046                                       | 1560.394124                             | 28.66653949                              | 3.756962991                         | 1.631664013                    |
| 0.524081183                                       | 202.2953368                             | 8.5077272021                             | 3.505181347                         | 1.16095063                     |
| 0.448772708                                       | 1098.595588                             | 99.56454248                              | 444.9031863                         | 437.8029642                    |
| 0.59658258                                        | 371.670947                              | 14.97752809                              | 2.836276083                         | 0.84559515                     |
| 0.524074791                                       | 711.1694915                             | 38.42078113                              | 4.961680177                         | 2.350014581                    |
| 0.659902344                                       | 633.50625                               | 9.96875                                  | 7.28125                             | 0.914052734                    |
| 0.464460914                                       | 201.5760369                             | 16.30875576                              | 12.56221198                         | 9.044426511                    |
| 0.439534491                                       | 203.0649351                             | 19.19047619                              | 7.158008658                         | 3.521640337                    |
| 0.439798639                                       | 461.7885714                             | 37.89904762                              | 11.68285714                         | 7.610148753                    |
| 0.571075829                                       | 2102.130128                             | 58.90437381                              | 3.864167346                         | 1.649480017                    |
| 0.530015452                                       | 955.6178591                             | 42.04936217                              | 10.15085968                         | 7.213713879                    |
| 0.480919921                                       | 505.9277567                             | 34.14448669                              | 209.9857414                         | 203.246486                     |
| 0.521415974                                       | 65.6984127                              | 5.174603175                              | 5.738095238                         | 2.772058555                    |
| 0.484174186                                       | 434.7884187                             | 29.97327394                              | 6.557906459                         | 3.57086721                     |
| 0.631570117                                       | 188.8394649                             | 4.230762031                              | 2.18729097                          | 0.450889811                    |
| 0.474389385                                       | 811.205848                              | 49.59415205                              | 8.352631579                         | 4.857262406                    |
| 0.430215214                                       | 106.2631579                             | 7.955465587                              | 5.522267206                         | 2.261830222                    |
| 0.560936651                                       | 768.4832117                             | 24.44963504                              | 3.148175182                         | 0.993494059                    |
| 0.481822045                                       | 805.6064593                             | 54.58971292                              | 7.309808612                         | 4.004023488                    |
| 0.497930139                                       | 335.1069837                             | 20.67607727                              | 4.690936107                         | 1.876717984                    |
| 0.417349066                                       | 855.9829352                             | 89.23013164                              | 79.68503169                         | 73.33590944                    |
| 0.423565533                                       | 1091.104814                             | 111.8322981                              | 140.2259317                         | 133.4287378                    |
| 0.488724029                                       | 2448.507385                             | 112.0399202                              | 10.47225549                         | 7.11480273                     |
| 0.59518026                                        | 470.1924051                             | 18.27848101                              | 2.840506329                         | 0.84490306                     |
| 0.612439957                                       | 494.8514851                             | 13.88366337                              | 2.679455446                         | 0.768354512                    |
| 0.523191796                                       | 206.6607595                             | 9.182278481                              | 3.579746835                         | 1.194872617                    |
| 0.530986569                                       | 610.1035683                             | 22.6362054                               | 3.559617058                         | 1.202630509                    |
| 0.554587878                                       | 1023.214634                             | 24.13495935                              | 3.906775068                         | 1.527322508                    |
| 0.52486685                                        | 173.2060606                             | 8.812121212                              | 3.454545455                         | 1.121983471                    |
| 0.580522899                                       | 533.5005441                             | 22.20565832                              | 3.195865071                         | 1.066615674                    |
| 0.563568973                                       | 1064.581789                             | 3.223928                                 | 3.223928                            | 1.137818038                    |
| 0.442593694                                       | 36.29268293                             | 3.609756098                              | 4.963414634                         | 1.836555622                    |
| 0.433540369                                       | 640.7726658                             | 65.36400541                              | 26.11840325                         | 20.85451438                    |
| 0.514052563                                       | 1703.056142                             | 44.04618171                              | 5.320857229                         | 2.588836393                    |
| 0.483694004                                       | 223.950324                              | 16.97408207                              | 5.624190065                         | 2.800628822                    |
| 0.621688108                                       | 717.4280763                             | 12.96013865                              | 2.403812825                         | 0.595090845                    |
| 0.4846213                                         | 49.43137255                             | 5.117647059                              | 6.637254902                         | 3.41839677                     |
| 0.545714286                                       | 38.2                                    | 3.314285714                              | 3.157142857                         | 0.907142857                    |
| 0.473729088                                       | 897.7166227                             | 58.54617414                              | 68.17467018                         | 63.77463816                    |
| 0.58284878                                        | 278.0188679                             | 10.12368973                              | 3.50524109                          | 1.314592865                    |
| 0.566917755                                       | 393.4409222                             | 12.5389049                               | 3.39481268                          | 1.226195716                    |
| 0.453657817                                       | 905.501002                              | 62.33567134                              | 14.55711423                         | 10.35831081                    |
| 0.451173197                                       | 1233.056348                             | 94.58653494                              | 17.18185145                         | 12.66875308                    |
| 0.475719374                                       | 63.27067669                             | 5.330827068                              | 9.030075188                         | 5.411498671                    |
| 0.53057565                                        | 411.196129                              | 15.4                                     | 4.061935484                         | 1.600073257                    |
| 0.58                                              | 46.4                                    | 2.875                                    | 3.5625                              | 1.19859375                     |
| 0.393703704                                       | 70.86666667                             | 9.822222222                              | 8.938888889                         | 4.505524691                    |
| 0.496281311                                       | 170.2244898                             | 11.98542274                              | 37.51895044                         | 31.98342527                    |

| wavelet.LLH_glszm_ZonePercentage | wavelet.LLH_glszm_LargeAreaLowGrayLevelEmphasis | wavelet.LLH_glszm_LargeAreaHighGrayLevelEmphasis | wavelet.LLH_glszm_HighGrayLevelZoneEmphasis |
|----------------------------------|-------------------------------------------------|--------------------------------------------------|---------------------------------------------|
| 0.468838527                      | 0.064706675                                     | 4706.432024                                      | 368.836858                                  |
| 0.512277323                      | 0.065924858                                     | 40638.53477                                      | 966.1456767                                 |
| 0.781105991                      | 0.022468369                                     | 4839.80531                                       | 2045.424779                                 |
| 0.58671268                       | 0.013134657                                     | 8689.465071                                      | 944.4062096                                 |
| 0.601671309                      | 0.014039581                                     | 3644.986111                                      | 738.3981481                                 |
| 0.609642302                      | 0.010913651                                     | 4224.431122                                      | 1059.451531                                 |
| 0.741839763                      | 0.004871148                                     | 9943.576                                         | 3908.376                                    |
| 0.684630739                      | 0.005583964                                     | 4907.634111                                      | 1641.034985                                 |
| 0.584415584                      | 0.011558873                                     | 5516.556379                                      | 1074.772016                                 |
| 0.645577792                      | 0.003235522                                     | 13445.125                                        | 3599.2955                                   |
| 0.674727932                      | 0.009549186                                     | 8303.170251                                      | 2578.301075                                 |
| 0.572874494                      | 0.005522628                                     | 9630.261484                                      | 1677.183746                                 |
| 0.636933462                      | 0.004019174                                     | 7498.498107                                      | 1837.271007                                 |
| 0.530411449                      | 0.030877493                                     | 4598.49747                                       | 609.8330523                                 |
| 0.581778266                      | 0.025308055                                     | 3078.613208                                      | 596.9339623                                 |
| 0.234345761                      | 4.49895809                                      | 1881146.763                                      | 699.453317                                  |
| 0.600286533                      | 0.016620653                                     | 4949.885442                                      | 1010.236277                                 |
| 0.458404803                      | 0.04858862                                      | 25416.90833                                      | 856.2974743                                 |
| 0.570446735                      | 0.016987921                                     | 2522.593373                                      | 580.5512048                                 |
| 0.539807212                      | 0.015133613                                     | 34572.93585                                      | 2113.812169                                 |
| 0.432235835                      | 0.477456262                                     | 118425.919                                       | 539.043012                                  |
| 0.688372093                      | 0.003171845                                     | 9062.584459                                      | 3024.637669                                 |
| 0.313072135                      | 0.579060341                                     | 21035.1345                                       | 257.3637427                                 |
| 0.742203742                      | 0.006886097                                     | 4156.47619                                       | 2101.680672                                 |
| 0.642026578                      | 0.008588666                                     | 6937.14489                                       | 1669.518758                                 |
| 0.66426513                       | 0.005989555                                     | 5982.117137                                      | 1847.652928                                 |
| 0.642815926                      | 0.004527484                                     | 18799.8456                                       | 4944.915619                                 |
| 0.70760642                       | 0.004438718                                     | 24504.1499                                       | 6570.058185                                 |
| 0.758640227                      | 0.007737612                                     | 4989.632562                                      | 2831.227035                                 |
| 0.492132179                      | 0.050683336                                     | 130869.1151                                      | 1618.1255                                   |
| 0.711229947                      | 0.001098696                                     | 23830.28704                                      | 7531.385228                                 |
| 0.54856661                       | 0.016215554                                     | 21512.747                                        | 1469.980326                                 |
| 0.564682735                      | 0.005562698                                     | 11102.32578                                      | 1748.587108                                 |
| 0.778846154                      | 0.02207929                                      | 2675.246914                                      | 1158.82716                                  |
| 0.719879518                      | 0.007253705                                     | 4983.769874                                      | 1789.535565                                 |
| 0.57029703                       | 0.009061586                                     | 5446.907118                                      | 941.8862847                                 |
| 0.648611111                      | 0.002060295                                     | 18864.27195                                      | 4759.067452                                 |
| 0.57543232                       | 0.007334669                                     | 18810.44456                                      | 1765.431088                                 |
| 0.651497006                      | 0.003457143                                     | 17003.09559                                      | 3824.849265                                 |
| 0.571973308                      | 0.011332819                                     | 5528.38                                          | 1015.365                                    |
| 0.588195387                      | 0.005844764                                     | 9357.771626                                      | 1589.567474                                 |
| 0.582371459                      | 0.010558033                                     | 4832                                             | 951.374748                                  |
| 0.550548112                      | 0.012663018                                     | 6557.700221                                      | 978.6935841                                 |
| 0.63804878                       | 0.008747715                                     | 5070.498471                                      | 1316.931193                                 |
| 0.65228967                       | 0.004506752                                     | 5808.030204                                      | 1632.44898                                  |
| 0.555206463                      | 0.011151303                                     | 6969.987065                                      | 933.5424414                                 |
| 0.560243788                      | 0.015818183                                     | 14060.22427                                      | 1047.167364                                 |
| 0.704974271                      | 0.004966575                                     | 6982.245742                                      | 2229                                        |
| 0.567164179                      | 0.074381832                                     | 2337.118421                                      | 340.2763158                                 |
| 0.782696177                      | 0.005209399                                     | 10224.05913                                      | 4506.257069                                 |
| 0.488609813                      | 0.022974305                                     | 17711.15182                                      | 967.4632397                                 |
| 0.605804111                      | 0.010111298                                     | 6054.339321                                      | 1346.830339                                 |
| 0.685946087                      | 0.007072517                                     | 14243.63411                                      | 4186.01488                                  |
| 0.653130288                      | 0.005381145                                     | 7311.518135                                      | 2177.170984                                 |
| 0.375287444                      | 0.45529126                                      | 436624.694                                       | 1072.285539                                 |
| 0.708759954                      | 0.0055559                                       | 4027.077047                                      | 1427.295345                                 |
| 0.61878705                       | 0.004385073                                     | 8191.005895                                      | 1665.030951                                 |
| 0.742459397                      | 0.001542496                                     | 31917.21667                                      | 9962.089583                                 |
| 0.533169533                      | 0.03493522                                      | 7440.37788                                       | 630.5115207                                 |
| 0.524404086                      | 0.048115452                                     | 2013.268398                                      | 350.9134199                                 |
| 0.495516753                      | 0.029918097                                     | 5812.375238                                      | 555.6409524                                 |
| 0.67196057                       | 0.001063082                                     | 22375.31296                                      | 6039.493344                                 |
| 0.583495146                      | 0.005080773                                     | 24935.95397                                      | 2594.130893                                 |
| 0.385206884                      | 0.123681245                                     | 361082.4382                                      | 1815.238593                                 |
| 0.580645161                      | 0.034622288                                     | 1980.896825                                      | 350.5952381                                 |
| 0.578235673                      | 0.009536806                                     | 6178.846325                                      | 1019.047884                                 |
| 0.758883249                      | 0.007637365                                     | 6401.769231                                      | 2831.280936                                 |
| 0.534876447                      | 0.010899818                                     | 9599.708187                                      | 1324.2                                      |
| 0.553811659                      | 0.016066463                                     | 4363.048583                                      | 752.708502                                  |
| 0.681253108                      | 0.002918567                                     | 7733.086131                                      | 2695.364234                                 |
| 0.55                             | 0.014577334                                     | 5014.592703                                      | 753.6549043                                 |
| 0.596102746                      | 0.013971848                                     | 3350.615156                                      | 802.9316493                                 |
| 0.396865325                      | 0.150532117                                     | 43693.59142                                      | 574.6348123                                 |
| 0.383561644                      | 0.127567869                                     | 156456.8505                                      | 1090.274845                                 |
| 0.545751634                      | 0.004034471                                     | 32851.65489                                      | 3056.012575                                 |
| 0.707885305                      | 0.003735013                                     | 5485.037975                                      | 1866.977215                                 |
| 0.723366159                      | 0.005092526                                     | 5292.219059                                      | 2177.12005                                  |
| 0.647540984                      | 0.015427942                                     | 3285.653165                                      | 1003.837975                                 |
| 0.651360544                      | 0.004668966                                     | 8532.255004                                      | 2491.175805                                 |
| 0.648278285                      | 0.002041627                                     | 15831.22764                                      | 4769.891599                                 |
| 0.654761905                      | 0.006139231                                     | 5754.154545                                      | 1711.124242                                 |
| 0.685309471                      | 0.009316938                                     | 5340.466812                                      | 1708.126224                                 |
| 0.676575931                      | 0.00323508                                      | 9841.467972                                      | 3040.946533                                 |
| 0.565517241                      | 0.02856005                                      | 2780.231707                                      | 536.695122                                  |
| 0.435859628                      | 0.067424398                                     | 11002.69959                                      | 482.3748309                                 |
| 0.605003652                      | 0.001506877                                     | 34367.94748                                      | 6325.385149                                 |
| 0.595115681                      | 0.032720276                                     | 2126.263499                                      | 441.1144708                                 |
| 0.743556701                      | 0.003889448                                     | 8047.428943                                      | 3446.865685                                 |
| 0.557377049                      | 0.036755428                                     | 2341.784314                                      | 295.6568627                                 |
| 0.666666667                      | 0.020705028                                     | 2265.928571                                      | 665.1142857                                 |
| 0.47672956                       | 0.049787787                                     | 96582.83166                                      | 1535.888654                                 |
| 0.675637394                      | 0.005495257                                     | 6585.322851                                      | 1843.389937                                 |
| 0.679060665                      | 0.009428882                                     | 7488.851585                                      | 2048.027378                                 |
| 0.48801956                       | 0.013440837                                     | 18034.74499                                      | 1303.993988                                 |
| 0.470719945                      | 0.024605586                                     | 13511.1416                                       | 869.5140871                                 |
| 0.5256917                        | 0.075603426                                     | 2903.037594                                      | 358.6466165                                 |
| 0.637335526                      | 0.005492366                                     | 7292.388387                                      | 1779.917419                                 |
| 0.650406504                      | 0.021304979                                     | 2095.875                                         | 748.675                                     |
| 0.474934037                      | 0.047371557                                     | 2506.172222                                      | 277.1777778                                 |
| 0.425030979                      | 0.043838757                                     | 38256.88047                                      | 968.6268222                                 |

| wavelet.LLH_glszm_SmallAreaEmphasis | wavelet.LLH_glszm_LowGrayLevelZoneEmphasis | wavelet.LLH_glszm_ZoneEntropy | wavelet.LLH_glszm_SmallAreaLowGrayLevelEmphasis | wavelet.LLH_ngtdm_Coarseness |
|-------------------------------------|--------------------------------------------|-------------------------------|-------------------------------------------------|------------------------------|
| 0.667749903                         | 0.01144737                                 | 6.302654538                   | 0.009665126                                     | 0.010181575                  |
| 0.745306925                         | 0.003288409                                | 6.761433707                   | 0.00199223                                      | 0.004205896                  |
| 0.834496067                         | 0.009705044                                | 6.705995894                   | 0.006975979                                     | 0.022163155                  |
| 0.760923833                         | 0.002593495                                | 6.416909241                   | 0.002266745                                     | 0.002730909                  |
| 0.735834904                         | 0.007832507                                | 6.085173121                   | 0.007354185                                     | 0.019338987                  |
| 0.733922465                         | 0.004765801                                | 6.320179423                   | 0.003919865                                     | 0.012056935                  |
| 0.82191                             | 0.004407293                                | 6.563125626                   | 0.004351014                                     | 0.026157774                  |
| 0.780932076                         | 0.003185281                                | 6.796683943                   | 0.002943297                                     | 0.008279176                  |
| 0.723118463                         | 0.00364191                                 | 6.673365535                   | 0.002618404                                     | 0.003651506                  |
| 0.760550011                         | 0.001408947                                | 7.677213723                   | 0.001255025                                     | 0.005364175                  |
| 0.779720188                         | 0.005257437                                | 7.153334168                   | 0.004881497                                     | 0.017562018                  |
| 0.728457537                         | 0.002073177                                | 6.753420898                   | 0.001855591                                     | 0.006367839                  |
| 0.765863289                         | 0.001647663                                | 6.784459653                   | 0.001483105                                     | 0.003904713                  |
| 0.68949176                          | 0.006868231                                | 6.529704837                   | 0.004696621                                     | 0.007864882                  |
| 0.728596059                         | 0.006443034                                | 6.31398473                    | 0.004123413                                     | 0.007315908                  |
| 0.653127561                         | 0.002430734                                | 6.403284757                   | 0.001841923                                     | 0.00186331                   |
| 0.731203041                         | 0.004782321                                | 6.37761061                    | 0.002604917                                     | 0.010072072                  |
| 0.673912492                         | 0.002715416                                | 6.708775645                   | 0.0027180049                                    | 0.003824857                  |
| 0.669870029                         | 0.006454363                                | 6.337952877                   | 0.005373579                                     | 0.013092907                  |
| 0.729715855                         | 0.001612827                                | 7.345067472                   | 0.001356282                                     | 0.005283301                  |
| 0.714534681                         | 0.004101525                                | 6.357147025                   | 0.003380753                                     | 0.001475449                  |
| 0.794691018                         | 0.001844671                                | 7.211674534                   | 0.001719717                                     | 0.001713195                  |
| 0.590882519                         | 0.008498843                                | 6.42839444                    | 0.005639902                                     | 0.003314162                  |
| 0.824107119                         | 0.004448503                                | 6.740114835                   | 0.004163969                                     | 0.019889572                  |
| 0.777802871                         | 0.003157288                                | 6.984749241                   | 0.002667611                                     | 0.009807026                  |
| 0.784323378                         | 0.003543282                                | 6.785632288                   | 0.003324708                                     | 0.015622114                  |
| 0.774007066                         | 0.001277191                                | 7.821254334                   | 0.000811981                                     | 0.005347039                  |
| 0.80469269                          | 0.003235367                                | 7.438251959                   | 0.003019588                                     | 0.008459117                  |
| 0.824821799                         | 0.003816105                                | 7.444759409                   | 0.003147976                                     | 0.006538361                  |
| 0.76254886                          | 0.001748814                                | 6.660123206                   | 0.001554899                                     | 0.003259739                  |
| 0.801306863                         | 0.000744116                                | 7.689718501                   | 0.00069973                                      | 0.005297299                  |
| 0.736482179                         | 0.001457211                                | 6.945526884                   | 0.001195039                                     | 0.001875439                  |
| 0.728867571                         | 0.001718746                                | 6.716559483                   | 0.001527352                                     | 0.003838377                  |
| 0.86882716                          | 0.015974688                                | 5.401095682                   | 0.014632701                                     | 0.050642781                  |
| 0.809435146                         | 0.005565849                                | 6.274558912                   | 0.005345769                                     | 0.023419661                  |
| 0.730433575                         | 0.002623362                                | 6.576162579                   | 0.002191605                                     | 0.00375443                   |
| 0.774255805                         | 0.001039568                                | 7.621815766                   | 0.000937288                                     | 0.005086098                  |
| 0.758420412                         | 0.001314169                                | 6.64766723                    | 0.001146491                                     | 0.002272476                  |
| 0.765488181                         | 0.002498877                                | 6.827836684                   | 0.002392677                                     | 0.011484397                  |
| 0.726459629                         | 0.004226579                                | 6.646140423                   | 0.003825351                                     | 0.00750357                   |
| 0.749845684                         | 0.002363601                                | 6.746797167                   | 0.002147811                                     | 0.006734615                  |
| 0.720969165                         | 0.004354126                                | 6.461291233                   | 0.003892628                                     | 0.008373616                  |
| 0.710297171                         | 0.003001996                                | 6.633088864                   | 0.002476771                                     | 0.004874103                  |
| 0.747182579                         | 0.004540857                                | 6.866376115                   | 0.004116717                                     | 0.00857407                   |
| 0.767128209                         | 0.001973394                                | 6.887609104                   | 0.001747891                                     | 0.004604723                  |
| 0.719249483                         | 0.002321578                                | 6.460900213                   | 0.001951233                                     | 0.003581139                  |
| 0.729477943                         | 0.002089534                                | 6.570517871                   | 0.001763121                                     | 0.01666937                   |
| 0.792436469                         | 0.003644889                                | 6.761574708                   | 0.003462188                                     | 0.017906761                  |
| 0.691281967                         | 0.022835019                                | 5.219783231                   | 0.016881515                                     | 0.033199454                  |
| 0.852601003                         | 0.003662478                                | 7.053472824                   | 0.003329276                                     | 0.022918638                  |
| 0.66827072                          | 0.002148022                                | 6.706909473                   | 0.001707809                                     | 0.00246577                   |
| 0.704653406                         | 0.004513934                                | 6.985343448                   | 0.003844403                                     | 0.014707762                  |
| 0.799963859                         | 0.002208184                                | 7.69513549                    | 0.001715446                                     | 0.004273745                  |
| 0.752145659                         | 0.003704601                                | 6.732721697                   | 0.003541                                        | 0.016455322                  |
| 0.696717554                         | 0.001779661                                | 6.639718477                   | 0.001432328                                     | 0.001270065                  |
| 0.800762997                         | 0.00320611                                 | 6.510312926                   | 0.002955973                                     | 0.008371262                  |
| 0.752324463                         | 0.001676609                                | 6.69885683                    | 0.001482156                                     | 0.003610394                  |
| 0.838720461                         | 0.001292085                                | 7.559429741                   | 0.001263641                                     | 0.011782403                  |
| 0.707153518                         | 0.006552042                                | 6.264832141                   | 0.004030012                                     | 0.00930067                   |
| 0.689242751                         | 0.009281278                                | 6.172343727                   | 0.006993978                                     | 0.007127321                  |
| 0.689140521                         | 0.004485907                                | 6.563133454                   | 0.003506126                                     | 0.003610312                  |
| 0.784360904                         | 0.000488147                                | 7.396307383                   | 0.000441573                                     | 0.002216823                  |
| 0.756416358                         | 0.001136515                                | 7.004079351                   | 0.001021351                                     | 0.003349754                  |
| 0.721096082                         | 0.001644945                                | 6.639516486                   | 0.001471253                                     | 0.003307593                  |
| 0.749404694                         | 0.014867287                                | 5.521413333                   | 0.013358962                                     | 0.029612629                  |
| 0.712887851                         | 0.002623712                                | 6.476575535                   | 0.002198538                                     | 0.004982732                  |
| 0.822574322                         | 0.006146954                                | 6.861597153                   | 0.005899203                                     | 0.022556773                  |
| 0.716335337                         | 0.001759069                                | 6.911379695                   | 0.001002888                                     | 0.002448823                  |
| 0.680665583                         | 0.007653144                                | 6.332392384                   | 0.006966791                                     | 0.016358348                  |
| 0.777714803                         | 0.001566781                                | 7.207468895                   | 0.001426398                                     | 0.005989433                  |
| 0.721743281                         | 0.003227404                                | 6.651751245                   | 0.002576817                                     | 0.00260742                   |
| 0.733296361                         | 0.006089282                                | 6.586969109                   | 0.005419355                                     | 0.006816541                  |
| 0.671107517                         | 0.00395495                                 | 6.557918793                   | 0.003146626                                     | 0.001526412                  |
| 0.676251907                         | 0.00204824                                 | 6.60715078                    | 0.001701682                                     | 0.001117199                  |
| 0.726752348                         | 0.00070131                                 | 7.317667481                   | 0.000566052                                     | 0.001225843                  |
| 0.79996263                          | 0.002477137                                | 6.611676636                   | 0.00232923                                      | 0.006308089                  |
| 0.810842498                         | 0.002955665                                | 6.936136147                   | 0.002727632                                     | 0.009198159                  |
| 0.751561271                         | 0.006556655                                | 6.611737993                   | 0.005307288                                     | 0.01330395                   |
| 0.757246938                         | 0.002053617                                | 7.071821755                   | 0.00180224                                      | 0.005892482                  |
| 0.773174449                         | 0.000944414                                | 7.667947202                   | 0.000854862                                     | 0.005662389                  |
| 0.752651515                         | 0.003968253                                | 6.42884626                    | 0.003705897                                     | 0.01397                      |
| 0.790410067                         | 0.002570216                                | 6.662260688                   | 0.00145983                                      | 0.005755188                  |
| 0.779445249                         | 0.001684391                                | 7.292953029                   | 0.001489216                                     | 0.004485279                  |
| 0.68682334                          | 0.016893052                                | 5.555424718                   | 0.015157734                                     | 0.040410276                  |
| 0.684636576                         | 0.004266823                                | 6.419662257                   | 0.00337252                                      | 0.002255291                  |
| 0.745137986                         | 0.00059314                                 | 7.793262416                   | 0.000529687                                     | 0.003407365                  |
| 0.72182966                          | 0.008484746                                | 6.195003473                   | 0.005156446                                     | 0.009776929                  |
| 0.816591385                         | 0.002401447                                | 7.454054249                   | 0.002181496                                     | 0.008983946                  |
| 0.723178932                         | 0.01675073                                 | 5.386557543                   | 0.015378998                                     | 0.032756274                  |
| 0.765353175                         | 0.017394408                                | 5.223796189                   | 0.017042965                                     | 0.054884719                  |
| 0.715788246                         | 0.001691612                                | 6.867661386                   | 0.001453994                                     | 0.002153069                  |
| 0.791623066                         | 0.003599045                                | 6.60627258                    | 0.003419387                                     | 0.012301545                  |
| 0.781505784                         | 0.004996597                                | 6.937930885                   | 0.004639503                                     | 0.010331332                  |
| 0.700531656                         | 0.001668305                                | 6.910324973                   | 0.001370379                                     | 0.002135868                  |
| 0.698623533                         | 0.002218479                                | 6.804624508                   | 0.001719394                                     | 0.001427996                  |
| 0.716147848                         | 0.023883613                                | 5.853120244                   | 0.017041417                                     | 0.027579212                  |
| 0.756388377                         | 0.002574285                                | 6.941300423                   | 0.00232023                                      | 0.00914256                   |
| 0.785288194                         | 0.015322705                                | 5.8418372                     | 0.014817348                                     | 0.039405067                  |
| 0.650792063                         | 0.014451573                                | 5.842963203                   | 0.012778451                                     | 0.017564158                  |
| 0.732143859                         | 0.007374757                                | 6.30497715                    | 0.006993866                                     | 0.009558821                  |

| wavelet.LLH_ngtdm_Complexity | wavelet.LLH_ngtdm_Strength | wavelet.LLH_ngtdm_Busyness | wavelet.LLH_ngtdm_Contrast | wavelet.HLH_gldm_GrayLevelVariance | wavelet.HLH_gldm_HighGrayLevelEmphasis |
|------------------------------|----------------------------|----------------------------|----------------------------|------------------------------------|----------------------------------------|
| 2.960422008                  | 4.663541383                | 0.13741056                 | 0.00027319                 | 15.55992745                        | 227.0028329                            |
| 3.076135173                  | 5.194258775                | 0.118872216                | 0.000105747                | 16.23931456                        | 357.2879153                            |
| 36.72076639                  | 48.42991617                | 0.016713881                | 0.002137097                | 29.6651872                         | 463.3410138                            |
| 2.471580502                  | 2.886359427                | 0.173300221                | 6.27E-05                   | 19.41230394                        | 360.0003795                            |
| 8.603178049                  | 11.3947213                 | 0.045447849                | 0.00099183                 | 6.87328621                         | 82.54874652                            |
| 7.203600233                  | 9.883095898                | 0.052275695                | 0.000431967                | 16.5369893                         | 260.2006221                            |
| 40.49644263                  | 52.11869738                | 0.010173183                | 0.0022127                  | 33.09263972                        | 331.7566766                            |
| 14.25123792                  | 16.07144357                | 0.052739703                | 0.00048304                 | 32.94616057                        | 637.7039528                            |
| 3.456409827                  | 4.350039173                | 0.119927663                | 9.31E-05                   | 15.47733826                        | 256.1375661                            |
| 8.94933436                   | 25.74812208                | 0.03341824                 | 0.000117408                | 19.97198718                        | 432.0174306                            |
| 17.83310405                  | 49.08926314                | 0.016294219                | 0.000664194                | 21.51899393                        | 275.356711                             |
| 5.024076034                  | 9.493671064                | 0.054639628                | 0.000131687                | 25.9544967                         | 449.8920378                            |
| 6.409628587                  | 7.739923669                | 0.075922418                | 0.000128468                | 13.56790855                        | 766.2685632                            |
| 3.384938252                  | 6.817311809                | 0.102047023                | 0.000156103                | 15.351903                          | 225.3685152                            |
| 4.44824064                   | 4.806407595                | 0.121932583                | 0.000288993                | 9.960099817                        | 250.5334797                            |
| 0.189156014                  | 1.041544898                | 0.513326882                | 3.93E-06                   | 4.93888625                         | 243.2850151                            |
| 5.893037747                  | 6.754203743                | 0.076437674                | 0.000547243                | 8.964723196                        | 142.1389865                            |
| 1.276341895                  | 2.893212579                | 0.174258609                | 6.21E-05                   | 15.30011121                        | 355.2375643                            |
| 4.535895214                  | 6.724283577                | 0.082279288                | 0.000447777                | 17.49331019                        | 205.9656357                            |
| 4.339297902                  | 17.03567891                | 0.052785238                | 8.05E-05                   | 13.104243                          | 290.093181                             |
| 0.493779168                  | 0.890158741                | 0.544895939                | 1.97E-05                   | 11.00173366                        | 430.2790965                            |
| 12.23150696                  | 21.2527578                 | 0.030718615                | 0.00023657                 | 20.40567875                        | 572.1093023                            |
| 0.300970819                  | 1.306025108                | 0.529136669                | 2.32E-05                   | 4.751319224                        | 186.5122666                            |
| 34.56154965                  | 43.57296563                | 0.020886833                | 0.00146818                 | 25.53297228                        | 308.8357588                            |
| 10.18236544                  | 21.74514731                | 0.039454365                | 0.000292596                | 24.02798741                        | 615.236711                             |
| 16.93931907                  | 36.47199225                | 0.023415668                | 0.000495531                | 18.30034507                        | 287.2319885                            |
| 8.16983599                   | 25.48679353                | 0.031613759                | 0.000154744                | 25.31129347                        | 407.6119446                            |
| 27.8717993                   | 57.0702527                 | 0.010986071                | 0.000565637                | 27.80098165                        | 433.4312631                            |
| 24.23729335                  | 39.15057809                | 0.049146377                | 0.00046148                 | 51.47666188                        | 578.1076487                            |
| 3.370098838                  | 5.578976793                | 0.088718195                | 6.02E-05                   | 17.4947813                         | 524.93155                              |
| 11.84753373                  | 31.38160823                | 0.020038476                | 0.000190173                | 28.7752943                         | 410.0257943                            |
| 1.34332956                   | 3.367833436                | 0.178559052                | 2.49E-05                   | 12.99373662                        | 658.4021922                            |
| 4.320989227                  | 6.72567096                 | 0.082444675                | 8.87E-05                   | 28.93988637                        | 1093.791933                            |
| 40.88148255                  | 40.29526028                | 0.020159419                | 0.010005941                | 34.12712648                        | 301.0096154                            |
| 27.43842127                  | 32.48005071                | 0.017235701                | 0.001670887                | 29.33875562                        | 237.063253                             |
| 2.66112381                   | 3.699696972                | 0.146522084                | 9.64E-05                   | 15.45732061                        | 258.740099                             |
| 13.93402066                  | 36.5540875                 | 0.020750047                | 0.000106692                | 23.2112412                         | 613.1107639                            |
| 2.659782655                  | 3.562387546                | 0.133111562                | 5.01E-05                   | 22.97739747                        | 576.4612403                            |
| 17.70937765                  | 33.52413835                | 0.017581679                | 0.000513113                | 15.78706443                        | 297.9868263                            |
| 6.513970531                  | 9.377642901                | 0.068280715                | 0.000231932                | 19.62014211                        | 398.8484271                            |
| 7.730098445                  | 17.61881898                | 0.040434415                | 0.000107747                | 22.25714465                        | 523.9077341                            |
| 4.685310337                  | 7.246532793                | 0.071598877                | 0.000238467                | 13.83009197                        | 225.4669645                            |
| 2.773657731                  | 3.975453934                | 0.129243102                | 0.00014603                 | 14.42396683                        | 322.4671133                            |
| 8.117948234                  | 10.67904201                | 0.057625875                | 0.000448386                | 18.45240119                        | 289.9463415                            |
| 7.374922692                  | 9.714107451                | 0.075029784                | 0.000169693                | 20.82606289                        | 1352.415335                            |
| 1.356460749                  | 2.215782745                | 0.206974948                | 9.08E-05                   | 21.00352197                        | 434.271544                             |
| 1.550367178                  | 1.794774359                | 0.266516362                | 3.80E-05                   | 18.7549029                         | 569.7522269                            |
| 18.99708264                  | 31.39028323                | 0.02021341                 | 0.001033591                | 20.37631109                        | 229.9056604                            |
| 9.268585428                  | 13.36734183                | 0.050079544                | 0.00250421                 | 15.81577189                        | 227.1492537                            |
| 78.04990421                  | 102.1157952                | 0.006841751                | 0.001593612                | 20.52327648                        | 316.1971831                            |
| 1.074992068                  | 2.19654471                 | 0.228810344                | 3.96E-05                   | 13.32908297                        | 615.0826519                            |
| 10.70730414                  | 28.10069444                | 0.035198182                | 0.000479213                | 11.41539253                        | 143.2902056                            |
| 7.903833578                  | 18.8119893                 | 0.04460733                 | 0.000143891                | 30.06779748                        | 573.1004973                            |
| 19.08422478                  | 30.57903455                | 0.018785637                | 0.000642281                | 31.9155007                         | 466.9661591                            |
| 0.578603534                  | 1.882101605                | 0.300713744                | 9.04E-06                   | 11.07369019                        | 610.696612                             |
| 11.01244283                  | 9.228010583                | 0.057165398                | 0.000572077                | 36.64909318                        | 492.2457338                            |
| 4.632192208                  | 5.584809431                | 0.086847373                | 0.000100158                | 15.46311742                        | 525.9799362                            |
| 40.53191383                  | 89.44549634                | 0.005840041                | 0.000576915                | 39.83807987                        | 788.2180974                            |
| 3.461399768                  | 4.943245098                | 0.097582504                | 0.000269487                | 13.43700988                        | 321.3230958                            |
| 2.203679114                  | 2.756609299                | 0.274769391                | 0.000319811                | 6.958839725                        | 118.0805902                            |
| 1.305017708                  | 1.952916004                | 0.291355502                | 0.000100348                | 11.76166868                        | 252.6045304                            |
| 5.674716764                  | 11.43182734                | 0.049977114                | 5.07E-05                   | 29.36611796                        | 1024.792808                            |
| 4.095335403                  | 8.505314238                | 0.059878475                | 5.74E-05                   | 19.26784481                        | 355.2721683                            |
| 1.499573563                  | 3.987998293                | 0.102318743                | 3.99E-05                   | 10.25212403                        | 315.5097034                            |
| 7.025896162                  | 9.775160107                | 0.068371816                | 0.001543791                | 8.714944042                        | 66.04147465                            |
| 3.445807473                  | 4.340528271                | 0.109223854                | 0.000133897                | 15.00321211                        | 400.5325177                            |
| 64.75381422                  | 64.54943601                | 0.011697173                | 0.002570017                | 28.19758948                        | 406.8654822                            |
| 3.119945063                  | 5.14299879                 | 0.145566072                | 5.76E-05                   | 16.50518056                        | 523.1009938                            |
| 6.793856172                  | 9.764362965                | 0.061901163                | 0.000837322                | 16.41102777                        | 397.4484305                            |
| 13.97888015                  | 32.1672792                 | 0.029278276                | 0.000132862                | 24.9927423                         | 882.9204376                            |
| 1.700129481                  | 2.621379045                | 0.24194839                 | 5.90E-05                   | 12.66429363                        | 319.9282895                            |
| 5.229397584                  | 7.365390653                | 0.097712003                | 0.000224733                | 14.32778014                        | 395.0788308                            |
| 0.527254867                  | 1.194295109                | 0.453327503                | 1.59E-05                   | 10.35526312                        | 354.7923762                            |
| 0.597385158                  | 1.503719815                | 0.342880386                | 9.47E-06                   | 7.585269667                        | 469.5343955                            |
| 2.463634782                  | 6.98794787                 | 0.100747404                | 1.22E-05                   | 18.35566438                        | 778.9075163                            |
| 12.06117101                  | 9.320879689                | 0.055399793                | 0.000428394                | 40.06606416                        | 1116.564516                            |
| 17.2218813                   | 25.24537218                | 0.032176847                | 0.000417424                | 38.25215098                        | 831.957923                             |
| 11.97391952                  | 14.77864401                | 0.055393049                | 0.0008409                  | 23.60867777                        | 452.2344262                            |
| 11.42299525                  | 18.6840139                 | 0.035033133                | 0.00016389                 | 17.11798325                        | 483.3253968                            |
| 10.77313536                  | 33.76389307                | 0.023775416                | 0.000110917                | 23.63901512                        | 418.4416725                            |
| 15.23568639                  | 14.02719617                | 0.035774867                | 0.000985613                | 22.92005228                        | 362.6785714                            |
| 9.093996696                  | 8.541504919                | 0.05945486                 | 0.000273868                | 38.89452538                        | 505.4996271                            |
| 12.93942446                  | 33.16597511                | 0.028769491                | 7.73E-05                   | 29.56577891                        | 669.8080229                            |
| 11.9332531                   | 17.33547575                | 0.030477663                | 0.002470582                | 8.883709869                        | 121.6827586                            |
| 0.617509589                  | 1.267128643                | 0.428707076                | 3.21E-05                   | 13.18461196                        | 251.3957535                            |
| 5.119346659                  | 20.03166449                | 0.030872412                | 4.49E-05                   | 15.39773277                        | 663.8235939                            |
| 3.08448194                   | 4.45045369                 | 0.159713648                | 0.000388728                | 15.71951679                        | 292.5269923                            |
| 20.38389246                  | 41.29560339                | 0.027676195                | 0.000480764                | 38.5675002                         | 431.3324742                            |
| 5.185120973                  | 7.206290634                | 0.070933418                | 0.001750218                | 45.01746842                        | 430.7213115                            |
| 16.08988439                  | 21.89307793                | 0.023994742                | 0.004947409                | 10.21895692                        | 103.847619                             |
| 2.02703435                   | 4.470673118                | 0.132317529                | 2.96E-05                   | 14.13880185                        | 474.2332075                            |
| 13.63430248                  | 16.91475405                | 0.038465309                | 0.00071497                 | 31.28922469                        | 622.4815864                            |
| 11.88984136                  | 21.36682288                | 0.031606697                | 0.000534206                | 30.31404598                        | 323.4540117                            |
| 1.684659787                  | 3.583035578                | 0.163819242                | 2.92E-05                   | 14.83585727                        | 515.4792176                            |
| 1.031701226                  | 2.360377641                | 0.313493515                | 1.78E-05                   | 12.72980999                        | 564.6884258                            |
| 6.192379107                  | 9.560696273                | 0.064744906                | 0.00113951                 | 16.76076802                        | 319.3557312                            |
| 8.657183989                  | 17.14912491                | 0.038362013                | 0.000276694                | 20.92367055                        | 436.3659539                            |
| 27.28783572                  | 23.2290457                 | 0.035779757                | 0.005812279                | 19.63963249                        | 322.6260163                            |
| 2.553524489                  | 4.614809542                | 0.115554931                | 0.00046275                 | 8.869765596                        | 166.474934                             |
| 3.89025401                   | 7.593309206                | 0.057972326                | 0.000195152                | 15.04220966                        | 438.4225527                            |



| wavelet.HLH_gldm_GrayLevelNonUniformityNormalized | wavelet.HLH_gldm_DependenceEntropy | wavelet.HLH_gldm_DependenceNonUniformity | wavelet.HLH_gldm_GrayLevelNonUniformity |
|---------------------------------------------------|------------------------------------|------------------------------------------|-----------------------------------------|
| 0.079107448                                       | 6.113990383                        | 140.2181303                              | 55.84985836                             |
| 0.091367985                                       | 6.488007737                        | 330.0900337                              | 189.7713048                             |
| 0.050555321                                       | 6.061553982                        | 127.9723502                              | 23.89400922                             |
| 0.074462948                                       | 6.299920928                        | 562.8178368                              | 196.2098672                             |
| 0.114795819                                       | 5.653648623                        | 62.94986072                              | 41.21169916                             |
| 0.078077344                                       | 6.045151113                        | 135.1866252                              | 50.2037325                              |
| 0.061469239                                       | 6.007152648                        | 92.35311573                              | 20.71513353                             |
| 0.051691029                                       | 6.348392885                        | 275.5708583                              | 51.79441118                             |
| 0.079748214                                       | 6.197604725                        | 433.4232804                              | 165.7965368                             |
| 0.070587826                                       | 6.373596487                        | 659.7049709                              | 218.6810846                             |
| 0.063809255                                       | 6.264123145                        | 194.267231                               | 52.77025393                             |
| 0.065902845                                       | 6.368546343                        | 338.6383266                              | 97.66801619                             |
| 0.08758575                                        | 6.196202465                        | 380.195757                               | 181.6528447                             |
| 0.083697889                                       | 6.257571158                        | 207.313059                               | 93.57423971                             |
| 0.094858426                                       | 5.827246821                        | 188.3567508                              | 86.41602634                             |
| 0.204708649                                       | 5.94460179                         | 628.3277674                              | 1422.110983                             |
| 0.108270868                                       | 6.010055457                        | 109.4183381                              | 75.5730659                              |
| 0.090357072                                       | 6.294702465                        | 405.2221269                              | 210.712693                              |
| 0.071385553                                       | 6.070944207                        | 135.6769759                              | 41.54639175                             |
| 0.104858634                                       | 6.47729715                         | 385.396287                               | 293.7090325                             |
| 0.110349014                                       | 6.287991927                        | 754.6213629                              | 576.4632466                             |
| 0.065948486                                       | 6.352170456                        | 385.7523256                              | 113.4313953                             |
| 0.148693661                                       | 5.92203354                         | 350.7978762                              | 406.0823874                             |
| 0.059383388                                       | 6.126567558                        | 125.5488565                              | 28.56340956                             |
| 0.070867043                                       | 6.426300752                        | 245.7358804                              | 85.32392027                             |
| 0.072498733                                       | 6.496225177                        | 117.0835735                              | 50.31412104                             |
| 0.062069951                                       | 6.540081895                        | 762.0305828                              | 215.1344489                             |
| 0.05251818                                        | 6.598188207                        | 312.8604327                              | 79.17585485                             |
| 0.043559935                                       | 6.841366207                        | 433.0453258                              | 76.88328612                             |
| 0.091606874                                       | 6.440423016                        | 433.6766326                              | 232.8646735                             |
| 0.059293347                                       | 6.603414953                        | 718.7722554                              | 188.4935514                             |
| 0.099608075                                       | 6.423694395                        | 930.0833052                              | 590.6758853                             |
| 0.064168229                                       | 6.417083592                        | 457.9090015                              | 130.4540089                             |
| 0.064534024                                       | 5.249537286                        | 36.55769231                              | 6.711538462                             |
| 0.056013209                                       | 6.040334067                        | 95.77108434                              | 18.59638554                             |
| 0.080693559                                       | 6.218626474                        | 390.370297                               | 163.0009901                             |
| 0.068493682                                       | 6.689896158                        | 533.1520833                              | 197.2618056                             |
| 0.071420876                                       | 6.440512713                        | 696.3559928                              | 239.5456172                             |
| 0.07278712                                        | 6.111055306                        | 186.0467066                              | 60.77724551                             |
| 0.077947039                                       | 6.290498002                        | 210.4261201                              | 81.76644423                             |
| 0.076404397                                       | 6.515963667                        | 265.4070556                              | 112.6200814                             |
| 0.085888821                                       | 6.084557055                        | 189.4071354                              | 81.85204617                             |
| 0.086331544                                       | 6.138170807                        | 313.6297199                              | 141.7563946                             |
| 0.07363141                                        | 6.099104431                        | 234.2078049                              | 75.47219512                             |
| 0.072993044                                       | 6.280965918                        | 392.3865815                              | 137.0809372                             |
| 0.067784264                                       | 6.219653749                        | 547.1095153                              | 151.0233393                             |
| 0.072151415                                       | 6.270753923                        | 307.4566338                              | 307.7979372                             |
| 0.066930674                                       | 6.099473347                        | 135.8164666                              | 39.02058319                             |
| 0.083426153                                       | 5.344445046                        | 33.68656716                              | 11.17910448                             |
| 0.065702059                                       | 6.144194968                        | 113.0241449                              | 32.65392354                             |
| 0.094228856                                       | 6.290332559                        | 585.2628505                              | 322.6396028                             |
| 0.086835037                                       | 6.088921896                        | 153.4836759                              | 71.81257557                             |
| 0.058920725                                       | 6.559162662                        | 895.8107825                              | 225.13609                               |
| 0.068125664                                       | 6.200675815                        | 135.9306261                              | 40.26226734                             |
| 0.134335424                                       | 6.199409427                        | 870.5351832                              | 876.2699678                             |
| 0.051282549                                       | 6.306150563                        | 257.8486917                              | 45.07736064                             |
| 0.086224065                                       | 6.167046134                        | 409.4468764                              | 189.0893753                             |
| 0.050843707                                       | 6.739349703                        | 289.9590101                              | 65.74091261                             |
| 0.095394479                                       | 6.138689147                        | 140.6953317                              | 77.65110565                             |
| 0.113987948                                       | 5.80487645                         | 140.3734393                              | 100.4233825                             |
| 0.091200961                                       | 6.156655051                        | 384.1165644                              | 193.2548372                             |
| 0.06573641                                        | 6.719703524                        | 1106.767068                              | 360.1040526                             |
| 0.087163519                                       | 6.457622935                        | 560.2330097                              | 269.3352751                             |
| 0.136277528                                       | 6.323857927                        | 306.3394361                              | 372.173929                              |
| 0.100172015                                       | 5.49777872                         | 43.35023041                              | 21.73732719                             |
| 0.094813064                                       | 6.092357581                        | 275.7598197                              | 147.2446877                             |
| 0.055154732                                       | 6.048686072                        | 111.6903353                              | 21.73096447                             |
| 0.081942535                                       | 6.298590258                        | 606.5846106                              | 261.9702846                             |
| 0.076977217                                       | 5.977355969                        | 97.7309417                               | 34.33183857                             |
| 0.066911203                                       | 6.366401922                        | 458.4997514                              | 134.5584286                             |
| 0.096477017                                       | 6.250281304                        | 506.4131579                              | 293.2901316                             |
| 0.086833077                                       | 6.202693065                        | 209.7174491                              | 98.03454384                             |
| 0.130212552                                       | 6.220524491                        | 648.7267802                              | 672.9384675                             |
| 0.140309728                                       | 6.190571166                        | 816.5035736                              | 942.320131                              |
| 0.091100835                                       | 6.562427597                        | 1433.857734                              | 836.3056645                             |
| 0.048737169                                       | 6.409768843                        | 319.1523297                              | 54.390681                               |
| 0.048924852                                       | 6.436932328                        | 324.0599821                              | 54.64905998                             |
| 0.062741199                                       | 6.155807823                        | 148.2098361                              | 38.27213115                             |
| 0.077011379                                       | 6.277143203                        | 344.3911565                              | 135.8480726                             |
| 0.065126975                                       | 6.619690925                        | 570.2733661                              | 185.3513703                             |
| 0.067570547                                       | 6.113417608                        | 119.031746                               | 34.05555556                             |
| 0.049419974                                       | 6.354446416                        | 408.2751678                              | 66.27218494                             |
| 0.060804355                                       | 6.527217239                        | 657.3882521                              | 169.7657593                             |
| 0.120760999                                       | 5.457972777                        | 26.46206897                              | 17.51034483                             |
| 0.091039554                                       | 6.225430836                        | 623.5897965                              | 308.7151283                             |
| 0.083729066                                       | 6.426746393                        | 960.2165814                              | 458.5003652                             |
| 0.081535279                                       | 6.06999119                         | 156.7377892                              | 63.4344473                              |
| 0.04767377                                        | 6.563502099                        | 408.2770619                              | 73.98969072                             |
| 0.061542596                                       | 5.934751787                        | 48.2568306                               | 11.26229508                             |
| 0.105487528                                       | 5.007022842                        | 26.9047619                               | 11.07619048                             |
| 0.092136672                                       | 6.400758029                        | 659.309434                               | 366.2432704                             |
| 0.060721938                                       | 6.249085964                        | 175.7648725                              | 42.86968839                             |
| 0.053354575                                       | 6.40737697                         | 266.5949119                              | 54.52837573                             |
| 0.099323414                                       | 6.380157857                        | 633.9525672                              | 406.2327628                             |
| 0.102085469                                       | 6.279324584                        | 887.8473992                              | 592.7082329                             |
| 0.078160884                                       | 5.746565567                        | 57.01581028                              | 19.77470356                             |
| 0.067877857                                       | 6.330500838                        | 271.5559211                              | 82.53947368                             |
| 0.07991275                                        | 5.398713111                        | 31.19512195                              | 9.829268293                             |
| 0.099783488                                       | 5.633118935                        | 74.39313984                              | 37.81794195                             |
| 0.111319941                                       | 6.27782661                         | 110.4052045                              | 89.83519207                             |

| wavelet.HLH_gldm_SmallDependenceEmphasis | wavelet.HLH_gldm_DependenceNonUniformityNormalized | wavelet.HLH_gldm_DependenceVariance | wavelet.HLH_gldm_LargeDependenceEmphasis |
|------------------------------------------|----------------------------------------------------|-------------------------------------|------------------------------------------|
| 0.377964017                              | 0.19860925                                         | 3.782832701                         | 11.92067989                              |
| 0.319149142                              | 0.158926352                                        | 7.845961767                         | 20.66008666                              |
| 0.500752989                              | 0.294867166                                        | 1.319522606                         | 5.543778802                              |
| 0.394034992                              | 0.213593107                                        | 3.685680069                         | 11.14573055                              |
| 0.278725087                              | 0.175347801                                        | 3.089470131                         | 13.26183844                              |
| 0.372737807                              | 0.210243585                                        | 2.239449122                         | 9.27060532                               |
| 0.464483341                              | 0.274044854                                        | 1.619227078                         | 6.454005935                              |
| 0.446235905                              | 0.275020817                                        | 1.352958753                         | 6.103792415                              |
| 0.355587728                              | 0.208476806                                        | 2.485252442                         | 9.836940837                              |
| 0.374257313                              | 0.212945439                                        | 2.639622973                         | 9.744996772                              |
| 0.410091176                              | 0.234905962                                        | 2.061386489                         | 8.068923821                              |
| 0.417970969                              | 0.228500895                                        | 2.543814118                         | 8.892037787                              |
| 0.309718779                              | 0.183315216                                        | 3.087417435                         | 12.19768563                              |
| 0.316411769                              | 0.185432074                                        | 3.944636634                         | 13.30232558                              |
| 0.321271706                              | 0.206758234                                        | 2.325671962                         | 10.09330406                              |
| 0.166521507                              | 0.090445914                                        | 11.21443874                         | 41.43673528                              |
| 0.257823601                              | 0.156759797                                        | 4.206426877                         | 16.28653295                              |
| 0.325040781                              | 0.173765921                                        | 4.742153321                         | 14.92624357                              |
| 0.377246432                              | 0.233121952                                        | 2.036584358                         | 8.381443299                              |
| 0.269359283                              | 0.137592391                                        | 9.392144719                         | 25.58407712                              |
| 0.291418373                              | 0.144452788                                        | 7.95682886                          | 22.36600306                              |
| 0.371038875                              | 0.224274608                                        | 2.054196863                         | 8.622093023                              |
| 0.201655664                              | 0.128450339                                        | 6.75623639                          | 24.46027096                              |
| 0.454657236                              | 0.261016334                                        | 1.633179317                         | 6.683991684                              |
| 0.375212148                              | 0.204099568                                        | 3.918659838                         | 11.91196013                              |
| 0.310019624                              | 0.168708319                                        | 3.980001495                         | 14.26801153                              |
| 0.387919699                              | 0.219858795                                        | 2.383354382                         | 9.072129256                              |
| 0.38820056                               | 0.218325494                                        | 2.579080774                         | 9.40893231                               |
| 0.415769109                              | 0.245351459                                        | 1.784951649                         | 7.412464589                              |
| 0.336952784                              | 0.170604497                                        | 8.891462455                         | 21.39889851                              |
| 0.407661665                              | 0.226100112                                        | 2.370731922                         | 8.752752438                              |
| 0.286319068                              | 0.156843728                                        | 5.523873408                         | 17.64789207                              |
| 0.406858922                              | 0.225238073                                        | 2.605137223                         | 9.129857354                              |
| 0.570779915                              | 0.351516272                                        | 0.762943787                         | 3.961538462                              |
| 0.453431225                              | 0.288467121                                        | 1.259544201                         | 5.807228916                              |
| 0.345936249                              | 0.193252622                                        | 3.187570826                         | 11.50594059                              |
| 0.349014559                              | 0.185122251                                        | 3.718286555                         | 12.58958333                              |
| 0.391934948                              | 0.207619557                                        | 3.750501808                         | 11.46213476                              |
| 0.384898268                              | 0.222810427                                        | 1.999090681                         | 8.463473054                              |
| 0.373905672                              | 0.200596873                                        | 3.333748334                         | 11.21544328                              |
| 0.3424151                                | 0.180059061                                        | 4.014544276                         | 13.35142469                              |
| 0.315131765                              | 0.198748306                                        | 2.739598484                         | 11.04826863                              |
| 0.325393342                              | 0.191004701                                        | 2.996359272                         | 11.53471376                              |
| 0.383222547                              | 0.228495419                                        | 2.040737656                         | 8.40097561                               |
| 0.370569947                              | 0.208938542                                        | 2.654417894                         | 9.925452609                              |
| 0.44052158                               | 0.245560824                                        | 2.461434203                         | 8.21454219                               |
| 0.383716723                              | 0.218813088                                        | 2.616110684                         | 9.484294421                              |
| 0.39731381                               | 0.232961349                                        | 2.026691067                         | 8.186963979                              |
| 0.396795191                              | 0.251392292                                        | 1.359768323                         | 6.850746269                              |
| 0.356024923                              | 0.227412766                                        | 1.874960022                         | 8.476861167                              |
| 0.316175041                              | 0.170929571                                        | 5.1819755                           | 15.8510514                               |
| 0.304492122                              | 0.185590902                                        | 2.802878661                         | 11.7738815                               |
| 0.416613322                              | 0.234444068                                        | 2.209610507                         | 8.25778592                               |
| 0.405100775                              | 0.230001059                                        | 2.026334098                         | 8.187817259                              |
| 0.272920183                              | 0.13345626                                         | 7.362446104                         | 22.77556339                              |
| 0.499675286                              | 0.293343221                                        | 1.49176914                          | 5.821387941                              |
| 0.330674936                              | 0.186706282                                        | 2.991250401                         | 11.62836297                              |
| 0.395829262                              | 0.224252908                                        | 2.14556817                          | 8.537509667                              |
| 0.327109003                              | 0.172844388                                        | 5.877590568                         | 16.6044226                               |
| 0.263724164                              | 0.15933421                                         | 3.967372749                         | 15.6015891                               |
| 0.321493295                              | 0.181272565                                        | 3.785524394                         | 13.16894762                              |
| 0.386540661                              | 0.20203853                                         | 4.171935643                         | 12.3713034                               |
| 0.343233515                              | 0.181305181                                        | 5.87089201                          | 15.99935275                              |
| 0.235133183                              | 0.112171159                                        | 10.65620503                         | 31.69644819                              |
| 0.314873794                              | 0.199770647                                        | 2.506232878                         | 10.69585253                              |
| 0.342428813                              | 0.177565885                                        | 3.937563049                         | 13.34385061                              |
| 0.46749154                               | 0.283478059                                        | 1.294802752                         | 5.796954315                              |
| 0.339801206                              | 0.189735568                                        | 3.390861526                         | 11.97904285                              |
| 0.38316113                               | 0.219127672                                        | 2.184057592                         | 8.878923767                              |
| 0.401184697                              | 0.227995898                                        | 2.616113118                         | 9.136250622                              |
| 0.32337562                               | 0.166583276                                        | 5.281182479                         | 16.1625                                  |
| 0.322381565                              | 0.185755048                                        | 3.482715525                         | 12.50398583                              |
| 0.264815107                              | 0.125527628                                        | 8.45185423                          | 25.61145511                              |
| 0.240022383                              | 0.121575875                                        | 9.211584099                         | 27.84425253                              |
| 0.295922793                              | 0.156193653                                        | 5.44717198                          | 17.42570806                              |
| 0.481804763                              | 0.28597879                                         | 1.400235737                         | 5.849462366                              |
| 0.479679264                              | 0.290116367                                        | 1.471312162                         | 5.923903312                              |
| 0.413940646                              | 0.242966944                                        | 1.716850309                         | 7.367213115                              |
| 0.355095812                              | 0.195233082                                        | 2.964285714                         | 10.99206349                              |
| 0.361123891                              | 0.200377149                                        | 2.959067701                         | 10.73858046                              |
| 0.421335464                              | 0.236174099                                        | 2.018707483                         | 7.916666667                              |
| 0.522473525                              | 0.304455755                                        | 1.277377673                         | 5.298284862                              |
| 0.427665882                              | 0.235454245                                        | 2.277571613                         | 8.279369628                              |
| 0.315775898                              | 0.182497027                                        | 4.28508918                          | 14.39310345                              |
| 0.32901787                               | 0.183895546                                        | 4.114614109                         | 13.43232085                              |
| 0.308417909                              | 0.175349997                                        | 3.89742997                          | 13.77465303                              |
| 0.349727591                              | 0.201462454                                        | 2.58004507                          | 10.2596401                               |
| 0.452855696                              | 0.263065117                                        | 1.540863468                         | 6.516752577                              |
| 0.514722673                              | 0.263698528                                        | 3.626683389                         | 9.972677596                              |
| 0.371878307                              | 0.256235828                                        | 1.438004535                         | 7.152380952                              |
| 0.316850699                              | 0.165864009                                        | 6.081630568                         | 17.47798742                              |
| 0.431123936                              | 0.248958743                                        | 1.721119662                         | 7.169971671                              |
| 0.455253839                              | 0.260856078                                        | 1.777562892                         | 6.904109589                              |
| 0.300277717                              | 0.155000628                                        | 6.103581638                         | 18.45476773                              |
| 0.293054082                              | 0.152918946                                        | 5.586372514                         | 17.9293834                               |
| 0.384047781                              | 0.225358934                                        | 1.964754956                         | 8.343873518                              |
| 0.387623598                              | 0.223319014                                        | 2.528563777                         | 9.171052632                              |
| 0.379614881                              | 0.253618878                                        | 1.455615044                         | 7.130081301                              |
| 0.31075407                               | 0.196287968                                        | 2.466733036                         | 10.78364116                              |
| 0.292625977                              | 0.136809423                                        | 9.97590169                          | 26.16480793                              |

| wavelet.HLH_gldm_LargeDependenceLowGrayLevelEmphasis | wavelet.HLH_gldm_SmallDependenceHighGrayLevelEmphasis | wavelet.HLH_gldm_LargeDependenceHighGrayLevelEmphasis |
|------------------------------------------------------|-------------------------------------------------------|-------------------------------------------------------|
| 0.062831719                                          | 90.05732196                                           | 2586.161473                                           |
| 0.063410048                                          | 120.4907672                                           | 7132.229658                                           |
| 0.017908081                                          | 241.0596476                                           | 2390.470046                                           |
| 0.035555965                                          | 144.8020831                                           | 3910.84592                                            |
| 0.230860975                                          | 25.55309272                                           | 999.6406685                                           |
| 0.044557148                                          | 102.2455237                                           | 2258.844479                                           |
| 0.034992024                                          | 173.3718366                                           | 1918.611276                                           |
| 0.012570025                                          | 291.29147                                             | 3725.869261                                           |
| 0.049560572                                          | 97.38146869                                           | 2418.305916                                           |
| 0.026402331                                          | 170.8458954                                           | 4081.762427                                           |
| 0.048056622                                          | 118.3148959                                           | 2148.981862                                           |
| 0.023633155                                          | 194.5909323                                           | 3852.139001                                           |
| 0.017027453                                          | 239.3933851                                           | 9240.233848                                           |
| 0.072707018                                          | 75.27279736                                           | 2882.840787                                           |
| 0.045682903                                          | 81.53171099                                           | 2470.911087                                           |
| 0.174304996                                          | 41.45832557                                           | 10011.30949                                           |
| 0.135428715                                          | 40.04720153                                           | 2227.018625                                           |
| 0.046590598                                          | 124.6520093                                           | 5133.107204                                           |
| 0.056920902                                          | 82.82107879                                           | 1589.340206                                           |
| 0.098991221                                          | 83.56476145                                           | 6932.842199                                           |
| 0.054722426                                          | 128.5838401                                           | 9378.327718                                           |
| 0.017622777                                          | 218.8224274                                           | 4767.388372                                           |
| 0.138547785                                          | 38.74887464                                           | 4485.126694                                           |
| 0.03673089                                           | 152.9833409                                           | 1896.216216                                           |
| 0.022010655                                          | 233.5147696                                           | 7184.019103                                           |
| 0.062880507                                          | 89.65838981                                           | 4003.465418                                           |
| 0.027639711                                          | 168.0084077                                           | 3519.638488                                           |
| 0.029033285                                          | 179.8697589                                           | 3800.966504                                           |
| 0.022197809                                          | 252.5772891                                           | 3961.962606                                           |
| 0.044183264                                          | 182.8352942                                           | 10767.93706                                           |
| 0.026622365                                          | 176.6829679                                           | 3459.13369                                            |
| 0.027988191                                          | 192.6526824                                           | 11491.10675                                           |
| 0.009383396                                          | 454.2295677                                           | 9731.669946                                           |
| 0.030103919                                          | 172.1344151                                           | 1210.528846                                           |
| 0.050715669                                          | 120.3555882                                           | 1281.430723                                           |
| 0.053647065                                          | 96.09933283                                           | 2782.182673                                           |
| 0.023639405                                          | 224.5999102                                           | 7377.676042                                           |
| 0.022252892                                          | 232.477989                                            | 6395.656231                                           |
| 0.033699007                                          | 114.6242911                                           | 2549.641916                                           |
| 0.033294009                                          | 157.1027246                                           | 4248.577693                                           |
| 0.029235275                                          | 185.3035679                                           | 6661.470828                                           |
| 0.063655549                                          | 76.51021678                                           | 2324.648478                                           |
| 0.044849335                                          | 109.7907369                                           | 3591.020097                                           |
| 0.036475222                                          | 117.1929136                                           | 2292.043902                                           |
| 0.008106509                                          | 498.6720559                                           | 13322.0181                                            |
| 0.021694769                                          | 193.8804147                                           | 3489.758079                                           |
| 0.018139588                                          | 226.3082575                                           | 5317.591889                                           |
| 0.0483305                                            | 93.9492609                                            | 1864.931389                                           |
| 0.043507505                                          | 85.54206468                                           | 1560.537313                                           |
| 0.037153729                                          | 119.3050282                                           | 2476.740443                                           |
| 0.027179162                                          | 200.5041376                                           | 9577.71875                                            |
| 0.108337343                                          | 48.50368206                                           | 1612.729141                                           |
| 0.017132438                                          | 252.7279679                                           | 4489.01675                                            |
| 0.024814605                                          | 200.788007                                            | 3584.884941                                           |
| 0.038741809                                          | 171.6235093                                           | 13643.94297                                           |
| 0.016305671                                          | 256.0593851                                           | 2738.197952                                           |
| 0.024332727                                          | 182.1248584                                           | 5917.352485                                           |
| 0.013569782                                          | 324.7720914                                           | 6500.481052                                           |
| 0.055951077                                          | 108.9388566                                           | 5258.097052                                           |
| 0.153543303                                          | 32.39295214                                           | 1767.449489                                           |
| 0.058976553                                          | 83.21581904                                           | 3232.657386                                           |
| 0.013352969                                          | 409.7977204                                           | 12091.78039                                           |
| 0.051810043                                          | 130.7127205                                           | 5442.595146                                           |
| 0.107516537                                          | 79.05790193                                           | 9636.512267                                           |
| 0.33404119                                           | 24.34712595                                           | 613.9032258                                           |
| 0.036556465                                          | 145.8279665                                           | 5172.312299                                           |
| 0.021356506                                          | 200.5914946                                           | 2269.997462                                           |
| 0.02503194                                           | 180.7438684                                           | 6097.435408                                           |
| 0.027115819                                          | 160.4403222                                           | 3415.403587                                           |
| 0.011728622                                          | 363.0437066                                           | 7849.13824                                            |
| 0.0559146                                            | 108.4868297                                           | 4930.125658                                           |
| 0.036532582                                          | 128.0164178                                           | 4732.377325                                           |
| 0.076977554                                          | 98.59993727                                           | 8729.056308                                           |
| 0.06095556                                           | 115.7801123                                           | 12918.21456                                           |
| 0.023940799                                          | 240.2931539                                           | 13123.48137                                           |
| 0.006741181                                          | 551.4004261                                           | 6351.268817                                           |
| 0.009573051                                          | 403.1448568                                           | 4841.594449                                           |
| 0.020953919                                          | 190.8776926                                           | 3211.713115                                           |
| 0.025573134                                          | 176.7064475                                           | 5185.870748                                           |
| 0.031693481                                          | 158.1396295                                           | 4287.816936                                           |
| 0.042516508                                          | 163.9752868                                           | 2664.861111                                           |
| 0.015425191                                          | 276.4820244                                           | 2506.992543                                           |
| 0.014878773                                          | 300.6063763                                           | 5199.82808                                            |
| 0.152901153                                          | 44.51980048                                           | 1564.468966                                           |
| 0.063764199                                          | 85.74870226                                           | 3277.305515                                           |
| 0.021916853                                          | 207.2668573                                           | 9060.728999                                           |
| 0.041235134                                          | 104.2413208                                           | 2919.77635                                            |
| 0.022454914                                          | 197.5892367                                           | 2820.823454                                           |
| 0.039691708                                          | 245.0623347                                           | 3469.147541                                           |
| 0.170981897                                          | 45.14000265                                           | 627.4095238                                           |
| 0.039101792                                          | 155.9232516                                           | 8126.352453                                           |
| 0.015001765                                          | 279.5576174                                           | 4333.014164                                           |
| 0.031258815                                          | 152.2846182                                           | 2102.385519                                           |
| 0.038156861                                          | 159.0709843                                           | 9268.865526                                           |
| 0.033312798                                          | 168.9176401                                           | 9921.939201                                           |
| 0.034529166                                          | 122.9854962                                           | 2547.047431                                           |
| 0.025143615                                          | 178.6405357                                           | 3891.714638                                           |
| 0.032556909                                          | 116.2746788                                           | 2423.829268                                           |
| 0.075569748                                          | 53.20082296                                           | 1782.379947                                           |
| 0.066130905                                          | 133.8298939                                           | 10834.15489                                           |

| wavelet.HLH_gldm_SmallDependenceLowGrayLevelEmphasis | wavelet.HLH_gldm_LowGrayLevelEmphasis | wavelet.HLH_gldm_DistanceZoneVariabilityNormalized | wavelet.HLH_gldm_LowIntensityEmphasis |
|------------------------------------------------------|---------------------------------------|----------------------------------------------------|---------------------------------------|
| 0.004478105                                          | 0.007949597                           | 0.967005991                                        | 0.011423952                           |
| 0.002128285                                          | 0.004330406                           | 0.930143687                                        | 0.006349599                           |
| 0.004000207                                          | 0.005398701                           | 0.901408                                           | 0.007331245                           |
| 0.003125495                                          | 0.005067257                           | 0.886134068                                        | 0.007527944                           |
| 0.008936344                                          | 0.024400133                           | 0.947406866                                        | 0.034568883                           |
| 0.004224587                                          | 0.007103511                           | 0.906699893                                        | 0.01075292                            |
| 0.006204505                                          | 0.009186809                           | 0.784401236                                        | 0.012512772                           |
| 0.00194878                                           | 0.00300101                            | 0.835272339                                        | 0.004008411                           |
| 0.00271626                                           | 0.006558037                           | 0.974152494                                        | 0.008011999                           |
| 0.002059351                                          | 0.003761909                           | 0.94062039                                         | 0.00523064                            |
| 0.003902091                                          | 0.008626073                           | 0.912803731                                        | 0.010244968                           |
| 0.002274172                                          | 0.003834832                           | 0.892389311                                        | 0.005189498                           |
| 0.000948846                                          | 0.001889464                           | 0.958467457                                        | 0.002922099                           |
| 0.003805337                                          | 0.008116742                           | 0.937414915                                        | 0.011934786                           |
| 0.002901253                                          | 0.005954865                           | 0.88677602                                         | 0.008582045                           |
| 0.001220818                                          | 0.004835958                           | 0.924168975                                        | 0.007522277                           |
| 0.005986621                                          | 0.012517598                           | 0.8828125                                          | 0.022882753                           |
| 0.00208795                                           | 0.004280435                           | 0.944037159                                        | 0.006209864                           |
| 0.006269172                                          | 0.010299295                           | 0.910644531                                        | 0.015204195                           |
| 0.001972754                                          | 0.004906724                           | 0.956091522                                        | 0.007066873                           |
| 0.001066252                                          | 0.002831942                           | 0.925271428                                        | 0.003596814                           |
| 0.001402486                                          | 0.002655102                           | 0.865207617                                        | 0.003547501                           |
| 0.001769479                                          | 0.00643386                            | 0.941833158                                        | 0.008929525                           |
| 0.005034826                                          | 0.008230163                           | 0.785696571                                        | 0.010601297                           |
| 0.001942109                                          | 0.003075043                           | 0.914510439                                        | 0.004790792                           |
| 0.005170955                                          | 0.008261777                           | 0.961104812                                        | 0.014975561                           |
| 0.002002113                                          | 0.003931112                           | 0.897704167                                        | 0.005003791                           |
| 0.001952498                                          | 0.003876293                           | 0.955046295                                        | 0.00478621                            |
| 0.002618601                                          | 0.004381235                           | 0.961290723                                        | 0.005882824                           |
| 0.00140773                                           | 0.002791882                           | 0.925382992                                        | 0.003940132                           |
| 0.002239639                                          | 0.004079713                           | 0.961856541                                        | 0.00521725                            |
| 0.000699334                                          | 0.001857615                           | 0.964723731                                        | 0.002387686                           |
| 0.000942256                                          | 0.001522317                           | 0.937694561                                        | 0.002171855                           |
| 0.016718512                                          | 0.018434458                           | 0.81768536                                         | 0.025751408                           |
| 0.009096413                                          | 0.014477357                           | 0.858699872                                        | 0.018773692                           |
| 0.003445235                                          | 0.006520547                           | 0.90015596                                         | 0.009520161                           |
| 0.001163558                                          | 0.002399016                           | 0.958710283                                        | 0.003197133                           |
| 0.001492766                                          | 0.002682164                           | 0.940766796                                        | 0.003638279                           |
| 0.003717426                                          | 0.006124433                           | 0.849502822                                        | 0.009032271                           |
| 0.002674191                                          | 0.004495781                           | 0.968405437                                        | 0.00674352                            |
| 0.001797315                                          | 0.003215869                           | 0.909923967                                        | 0.005037663                           |
| 0.003453795                                          | 0.007423413                           | 0.943230396                                        | 0.010530271                           |
| 0.001951703                                          | 0.005272086                           | 0.935659093                                        | 0.006656535                           |
| 0.00329998                                           | 0.005930643                           | 0.851898563                                        | 0.008174299                           |
| 0.00085078                                           | 0.001329638                           | 0.879363446                                        | 0.002114683                           |
| 0.002038407                                          | 0.003522296                           | 0.964800041                                        | 0.004434414                           |
| 0.001111405                                          | 0.002314407                           | 0.851954067                                        | 0.00283448                            |
| 0.005897176                                          | 0.009597568                           | 0.935785188                                        | 0.013879605                           |
| 0.012966683                                          | 0.015815171                           | 0.87359954                                         | 0.029853957                           |
| 0.003848443                                          | 0.006561614                           | 0.820758743                                        | 0.009782742                           |
| 0.000898564                                          | 0.002087048                           | 0.931396796                                        | 0.002744182                           |
| 0.005352099                                          | 0.012211224                           | 0.965763819                                        | 0.017014989                           |
| 0.001324487                                          | 0.002537991                           | 0.943873091                                        | 0.003053604                           |
| 0.005443974                                          | 0.006945999                           | 0.903365289                                        | 0.012046569                           |
| 0.000706946                                          | 0.001960112                           | 0.959748546                                        | 0.002562666                           |
| 0.003214971                                          | 0.004532766                           | 0.84063996                                         | 0.005996965                           |
| 0.001299732                                          | 0.002694209                           | 0.787817752                                        | 0.003767567                           |
| 0.001523727                                          | 0.002451361                           | 0.764690844                                        | 0.003598036                           |
| 0.002659165                                          | 0.0050225                             | 0.890691796                                        | 0.007815415                           |
| 0.005298378                                          | 0.012755254                           | 0.967222222                                        | 0.020179243                           |
| 0.002484466                                          | 0.00565348                            | 0.923590541                                        | 0.007576234                           |
| 0.000655315                                          | 0.001311358                           | 0.927216801                                        | 0.001625066                           |
| 0.002495411                                          | 0.004846931                           | 0.968885745                                        | 0.007005914                           |
| 0.001862288                                          | 0.004536719                           | 0.95654321                                         | 0.007801385                           |
| 0.024867201                                          | 0.05274042                            | 0.95183661                                         | 0.076410461                           |
| 0.001849998                                          | 0.00368595                            | 0.907807617                                        | 0.005257273                           |
| 0.004341461                                          | 0.006089195                           | 0.845925408                                        | 0.008494275                           |
| 0.001217205                                          | 0.002595892                           | 0.972430369                                        | 0.003449794                           |
| 0.003432235                                          | 0.005219444                           | 0.893027952                                        | 0.008261434                           |
| 0.001180312                                          | 0.001915271                           | 0.933825181                                        | 0.002716837                           |
| 0.001956672                                          | 0.004323655                           | 0.920209557                                        | 0.005898647                           |
| 0.002387173                                          | 0.004321024                           | 0.965863961                                        | 0.007033252                           |
| 0.001221301                                          | 0.003464709                           | 0.950334487                                        | 0.004576176                           |
| 0.000745672                                          | 0.00244031                            | 0.952219908                                        | 0.003090779                           |
| 0.000586074                                          | 0.001564689                           | 0.964654547                                        | 0.001949493                           |
| 0.001425061                                          | 0.001946206                           | 0.850839096                                        | 0.002712266                           |
| 0.001948156                                          | 0.002713705                           | 0.86363392                                         | 0.003711027                           |
| 0.003312211                                          | 0.004828204                           | 0.900277008                                        | 0.007410984                           |
| 0.00189927                                           | 0.003367979                           | 0.878562995                                        | 0.005085346                           |
| 0.001909697                                          | 0.003857847                           | 0.911665279                                        | 0.005105951                           |
| 0.003201674                                          | 0.008089551                           | 0.805380976                                        | 0.009242474                           |
| 0.003653108                                          | 0.004867183                           | 0.822428834                                        | 0.006502146                           |
| 0.00139654                                           | 0.002389231                           | 0.935830919                                        | 0.00309837                            |
| 0.011970981                                          | 0.01939787                            | 0.808673469                                        | 0.033255658                           |
| 0.002540597                                          | 0.006389675                           | 0.969872239                                        | 0.008169715                           |
| 0.000807469                                          | 0.001918705                           | 0.843842951                                        | 0.002533967                           |
| 0.003709259                                          | 0.006253851                           | 0.973775124                                        | 0.010055215                           |
| 0.003759466                                          | 0.005654826                           | 0.856866825                                        | 0.007763058                           |
| 0.007809739                                          | 0.009531505                           | 0.925346404                                        | 0.014233984                           |
| 0.010756129                                          | 0.032726526                           | 0.916824197                                        | 0.037145665                           |
| 0.001130492                                          | 0.002703507                           | 0.915866822                                        | 0.00347095                            |
| 0.002643361                                          | 0.003761044                           | 0.955578512                                        | 0.005622835                           |
| 0.004181993                                          | 0.006599267                           | 0.893952784                                        | 0.008659191                           |
| 0.001127826                                          | 0.002592407                           | 0.935413831                                        | 0.00366505                            |
| 0.000824283                                          | 0.00214764                            | 0.954862813                                        | 0.002774818                           |
| 0.006204764                                          | 0.00837503                            | 0.852200255                                        | 0.014444151                           |
| 0.002424164                                          | 0.004097904                           | 0.949764117                                        | 0.005839392                           |
| 0.01031443                                           | 0.012459182                           | 0.893200427                                        | 0.024463958                           |
| 0.005728183                                          | 0.010550335                           | 0.799875629                                        | 0.017297549                           |
| 0.002619491                                          | 0.004365204                           | 0.911629224                                        | 0.008392493                           |

| wavelet.HLH_gldzm_LargeDistanceEmphasis | wavelet.HLH_gldzm_HighIntensitySmallDistanceEmphasis | wavelet.HLH_gldzm_LowintensityLargeDistanceEmphasis | wavelet.HLH_gldzm_HighIntensityEmphasis |
|-----------------------------------------|------------------------------------------------------|-----------------------------------------------------|-----------------------------------------|
| 1.05033557                              | 232.5998322                                          | 0.012002447                                         | 236.2013423                             |
| 1.108724832                             | 367.3362416                                          | 0.006890435                                         | 378.3355705                             |
| 1.156                                   | 464.744                                              | 0.00790445                                          | 480.32                                  |
| 1.181818182                             | 349.8761905                                          | 0.008802688                                         | 368.008658                              |
| 1.081081081                             | 93.44369369                                          | 0.037232187                                         | 94.61261261                             |
| 1.147169811                             | 267.2735849                                          | 0.02323676                                          | 275.8490566                             |
| 1.368715084                             | 338.6494413                                          | 0.015817034                                         | 365.2346369                             |
| 1.271698113                             | 599.084434                                           | 0.004626432                                         | 649.5622642                             |
| 1.039285714                             | 269.141369                                           | 0.008143217                                         | 272.6011905                             |
| 1.091883614                             | 441.3047473                                          | 0.005491926                                         | 453.5689127                             |
| 1.137055838                             | 274.8204315                                          | 0.010918621                                         | 286.213198                              |
| 1.171184023                             | 443.9350927                                          | 0.010474016                                         | 463.2467903                             |
| 1.063649222                             | 756.8635078                                          | 0.003002649                                         | 771.7765205                             |
| 1.097014925                             | 231.2493781                                          | 0.014943194                                         | 234.8781095                             |
| 1.180722892                             | 244.4314759                                          | 0.009666223                                         | 254.8343373                             |
| 1.118421053                             | 243.3991228                                          | 0.008386881                                         | 250.7307018                             |
| 1.1875                                  | 148.5351563                                          | 0.027392895                                         | 156.65625                               |
| 1.086434574                             | 370.1671669                                          | 0.006875048                                         | 380.8967587                             |
| 1.140625                                | 216.5449219                                          | 0.017032552                                         | 221.6015625                             |
| 1.067375887                             | 308.8229905                                          | 0.007638289                                         | 312.9799054                             |
| 1.116626794                             | 427.6267943                                          | 0.003953199                                         | 441.0316986                             |
| 1.218034993                             | 554.2106326                                          | 0.008026434                                         | 588.0444145                             |
| 1.08994709                              | 187.2694004                                          | 0.009627166                                         | 191.7231041                             |
| 1.366141732                             | 297.0403543                                          | 0.012367745                                         | 333.4212598                             |
| 1.134241245                             | 602.1785019                                          | 0.005087722                                         | 625.0038911                             |
| 1.05952381                              | 290.9464286                                          | 0.027094254                                         | 294.6428571                             |
| 1.162214984                             | 410.6872964                                          | 0.005838811                                         | 430.0260586                             |
| 1.069018405                             | 453.8822853                                          | 0.005199862                                         | 461.1027607                             |
| 1.059233449                             | 599.7067364                                          | 0.0060607                                           | 609.7049942                             |
| 1.116445352                             | 526.5556691                                          | 0.005086408                                         | 542.9836568                             |
| 1.058350101                             | 423.8383635                                          | 0.005486954                                         | 431.739772                              |
| 1.053882726                             | 663.3029583                                          | 0.002618953                                         | 671.6856841                             |
| 1.096566524                             | 1087.918723                                          | 0.002278044                                         | 1114.729614                             |
| 1.304347826                             | 274.7971014                                          | 0.028178242                                         | 301.057971                              |
| 1.229508197                             | 249.9576503                                          | 0.038181682                                         | 259.1256831                             |
| 1.158097686                             | 266.343509                                           | 0.011597168                                         | 278.1169666                             |
| 1.063268893                             | 630.5169156                                          | 0.00334856                                          | 643.2346221                             |
| 1.091649695                             | 580.1905974                                          | 0.003861504                                         | 594.1575017                             |
| 1.245901639                             | 279.8907104                                          | 0.010309611                                         | 298.0956284                             |
| 1.048165138                             | 417.3021789                                          | 0.006994558                                         | 421.146789                              |
| 1.141818182                             | 528.2513636                                          | 0.010882266                                         | 544.3109091                             |
| 1.087719298                             | 238.5716374                                          | 0.011372016                                         | 243.9093567                             |
| 1.099833611                             | 328.2870216                                          | 0.007134441                                         | 336.890183                              |
| 1.241610738                             | 285.6750559                                          | 0.010027593                                         | 304.787472                              |
| 1.193426043                             | 1281.775917                                          | 0.002289004                                         | 1348.116308                             |
| 1.053763441                             | 433.5893817                                          | 0.004677916                                         | 438.6962366                             |
| 1.241511501                             | 546.8206462                                          | 0.003361464                                         | 585.3959474                             |
| 1.099630996                             | 228.7905904                                          | 0.015154899                                         | 233.7749077                             |
| 1.203389831                             | 213.1483051                                          | 0.031449276                                         | 222.3389831                             |
| 1.298578199                             | 313.6872038                                          | 0.026559577                                         | 336.3080569                             |
| 1.106699752                             | 615.1199338                                          | 0.002935759                                         | 633.2043011                             |
| 1.052264808                             | 157.7020906                                          | 0.019116159                                         | 159.4111498                             |
| 1.086695747                             | 586.5404853                                          | 0.003223355                                         | 603.1472192                             |
| 1.152727273                             | 479.7854545                                          | 0.01257513                                          | 494.2836364                             |
| 1.061643836                             | 618.7664647                                          | 0.004479273                                         | 628.5864067                             |
| 1.261904762                             | 471.4499008                                          | 0.008088028                                         | 507.7222222                             |
| 1.361940299                             | 499.357898                                           | 0.005133789                                         | 552.2338308                             |
| 1.40862069                              | 746.9801724                                          | 0.004472042                                         | 818.9258621                             |
| 1.174061433                             | 316.3088737                                          | 0.008452636                                         | 332.552901                              |
| 1.05                                    | 122.590625                                           | 0.020856529                                         | 123.8875                                |
| 1.119363395                             | 251.2669098                                          | 0.008391941                                         | 259.6312997                             |
| 1.113466334                             | 1028.333541                                          | 0.00179319                                          | 1061.296758                             |
| 1.047420965                             | 373.2468802                                          | 0.007177469                                         | 378.5274542                             |
| 1.066666667                             | 330.8311111                                          | 0.008234813                                         | 338.5466667                             |
| 1.074074074                             | 73.5617284                                           | 0.076794225                                         | 77.20987654                             |
| 1.14532872                              | 406.3594291                                          | 0.010869731                                         | 423.2681661                             |
| 1.252336449                             | 392.9614486                                          | 0.009636371                                         | 423.0981308                             |
| 1.041940789                             | 529.9693668                                          | 0.003658997                                         | 534.0049342                             |
| 1.170103093                             | 401.6443299                                          | 0.008858323                                         | 418.3608247                             |
| 1.102783726                             | 879.0760171                                          | 0.006171083                                         | 902.751606                              |
| 1.124884366                             | 324.4946809                                          | 0.007169443                                         | 334.3237743                             |
| 1.052109181                             | 396.6848635                                          | 0.00722892                                          | 400.853598                              |
| 1.076446281                             | 367.7424242                                          | 0.00489924                                          | 375.1205234                             |
| 1.073469388                             | 472.1957726                                          | 0.003282931                                         | 481.0081633                             |
| 1.053989813                             | 803.4034805                                          | 0.002026511                                         | 815.1429542                             |
| 1.243506494                             | 1079.850244                                          | 0.003076438                                         | 1141.577922                             |
| 1.2208                                  | 794.2508                                             | 0.004087863                                         | 840.824                                 |
| 1.157894737                             | 442.5052632                                          | 0.007959496                                         | 463.9894737                             |
| 1.194805195                             | 474.5858586                                          | 0.005796773                                         | 495.979798                              |
| 1.138936535                             | 423.9826329                                          | 0.00627265                                          | 437.4408233                             |
| 1.327731092                             | 353.0861345                                          | 0.011164151                                         | 388.3361345                             |
| 1.295454545                             | 481.5552399                                          | 0.007663195                                         | 526.0542929                             |
| 1.099557522                             | 681.6718289                                          | 0.003332468                                         | 699.5612094                             |
| 1.321428571                             | 126.9866071                                          | 0.104260008                                         | 136.75                                  |
| 1.04589372                              | 257.8218599                                          | 0.008600632                                         | 259.9782609                             |
| 1.256097561                             | 626.1169141                                          | 0.003042164                                         | 671.9750795                             |
| 1.03986711                              | 296.0697674                                          | 0.010378581                                         | 297.4152824                             |
| 1.232758621                             | 410.5344828                                          | 0.010607971                                         | 432.9901478                             |
| 1.116504854                             | 466.9927184                                          | 0.014602393                                         | 476.8737864                             |
| 1.130434783                             | 111.423913                                           | 0.102510941                                         | 118.6304348                             |
| 1.132008517                             | 471.8468772                                          | 0.003837387                                         | 489.7452094                             |
| 1.068181818                             | 631.2066761                                          | 0.005775008                                         | 642.3948864                             |
| 1.168539326                             | 320.0800562                                          | 0.009916541                                         | 336.0505618                             |
| 1.10022779                              | 519.3747153                                          | 0.003919563                                         | 533.2824601                             |
| 1.069306931                             | 565.6784928                                          | 0.002943906                                         | 576.5456546                             |
| 1.241071429                             | 305.1964286                                          | 0.015232599                                         | 327.6696429                             |
| 1.077348066                             | 446.021639                                           | 0.006069199                                         | 455.4456722                             |
| 1.169811321                             | 293.3726415                                          | 0.025290332                                         | 305.754717                              |
| 1.338345865                             | 152.7443609                                          | 0.043670701                                         | 169.7293233                             |
| 1.138996139                             | 446.3899614                                          | 0.008745115                                         | 463.2200772                             |

| wavelet.HLH_gldzm_DistanceZoneVariability | wavelet.HLH_gldzm_ZonePercentage | wavelet.HLH_gldzm_IntensityVariabilityNormalized | wavelet.HLH_gldzm_LowIntensitySmallDistanceEmphasis | wavelet.HLH_gldzm_IntensityVariability |
|-------------------------------------------|----------------------------------|--------------------------------------------------|-----------------------------------------------------|----------------------------------------|
| 288.167852                                | 0.422096317                      | 0.056438899                                      | 0.011279328                                         | 16.81879195                            |
| 692.957047                                | 0.358690419                      | 0.052965182                                      | 0.006214389                                         | 39.4590604                             |
| 225.352                                   | 0.576036866                      | 0.046624                                         | 0.007187943                                         | 11.656                                 |
| 1023.484848                               | 0.438330171                      | 0.048437623                                      | 0.007209258                                         | 55.94545455                            |
| 105.1621622                               | 0.309192201                      | 0.082217352                                      | 0.033903057                                         | 9.126126126                            |
| 240.2754717                               | 0.412130638                      | 0.053214667                                      | 0.00763196                                          | 14.10188679                            |
| 140.4078212                               | 0.53115727                       | 0.05159015                                       | 0.011686707                                         | 9.234636872                            |
| 442.6943396                               | 0.528942116                      | 0.042684229                                      | 0.003853906                                         | 22.62264151                            |
| 818.2880952                               | 0.404040404                      | 0.056697846                                      | 0.007979194                                         | 47.62619048                            |
| 1228.45023                                | 0.421562298                      | 0.050348374                                      | 0.005165319                                         | 65.75497703                            |
| 359.6446701                               | 0.476420798                      | 0.051263882                                      | 0.010076554                                         | 20.19796954                            |
| 625.5649073                               | 0.473009447                      | 0.045292948                                      | 0.003868368                                         | 31.75035663                            |
| 677.6364922                               | 0.340887175                      | 0.057743439                                      | 0.002901962                                         | 40.82461103                            |
| 376.840796                                | 0.359570662                      | 0.054045692                                      | 0.011182684                                         | 21.72636816                            |
| 294.4096386                               | 0.364434687                      | 0.068950501                                      | 0.008311                                            | 22.89156627                            |
| 1053.552632                               | 0.164099611                      | 0.074213604                                      | 0.007306126                                         | 84.60350877                            |
| 169.5                                     | 0.275071633                      | 0.075303819                                      | 0.021755218                                         | 14.45833333                            |
| 786.3829532                               | 0.357204117                      | 0.052174051                                      | 0.006043568                                         | 43.46098439                            |
| 233.125                                   | 0.439862543                      | 0.055908203                                      | 0.014747106                                         | 14.3125                                |
| 808.8534279                               | 0.302034988                      | 0.054004661                                      | 0.006924018                                         | 45.68794326                            |
| 1547.053828                               | 0.320061256                      | 0.059238427                                      | 0.003507718                                         | 99.04665072                            |
| 642.8492598                               | 0.431976744                      | 0.050993662                                      | 0.002427768                                         | 37.88829071                            |
| 534.0194004                               | 0.207616258                      | 0.090083953                                      | 0.008755115                                         | 51.07760141                            |
| 199.5669291                               | 0.528066528                      | 0.048360973                                      | 0.010159684                                         | 12.28346457                            |
| 470.0583658                               | 0.426910299                      | 0.046427652                                      | 0.00471656                                          | 23.8681323                             |
| 242.1984127                               | 0.363112392                      | 0.052563618                                      | 0.011945887                                         | 13.24603175                            |
| 1377.975896                               | 0.44287363                       | 0.045422233                                      | 0.004795037                                         | 69.72312704                            |
| 622.690184                                | 0.454989532                      | 0.046605066                                      | 0.004682798                                         | 30.38650307                            |
| 827.6713124                               | 0.487818697                      | 0.035831981                                      | 0.005838355                                         | 30.85133566                            |
| 905.9499489                               | 0.385129819                      | 0.049998904                                      | 0.003653563                                         | 48.94892748                            |
| 1434.128102                               | 0.469015414                      | 0.045902511                                      | 0.005149823                                         | 68.44064386                            |
| 1826.221342                               | 0.319224283                      | 0.057675999                                      | 0.00232987                                          | 109.1806656                            |
| 873.9313305                               | 0.458435809                      | 0.042379672                                      | 0.002145307                                         | 39.49785408                            |
| 56.42028986                               | 0.663461538                      | 0.052299937                                      | 0.0251447                                           | 3.608695652                            |
| 157.1420765                               | 0.551204819                      | 0.046910926                                      | 0.013921694                                         | 8.584699454                            |
| 700.3213368                               | 0.385148515                      | 0.053819364                                      | 0.009000909                                         | 41.8714653                             |
| 1091.012302                               | 0.395138889                      | 0.047212295                                      | 0.003159276                                         | 53.72759227                            |
| 1385.749491                               | 0.439177102                      | 0.047067168                                      | 0.003582473                                         | 69.3299389                             |
| 310.9180328                               | 0.438323353                      | 0.057645794                                      | 0.008712936                                         | 21.09836066                            |
| 422.2247706                               | 0.415633937                      | 0.050658615                                      | 0.006680761                                         | 22.08715596                            |
| 500.4581818                               | 0.373134328                      | 0.046816529                                      | 0.003576512                                         | 25.74909091                            |
| 322.5847953                               | 0.358866737                      | 0.060086864                                      | 0.010319834                                         | 20.5497076                             |
| 562.3311148                               | 0.366017052                      | 0.055495417                                      | 0.006537058                                         | 33.35274542                            |
| 380.7986577                               | 0.436097561                      | 0.053105716                                      | 0.007710976                                         | 23.73825503                            |
| 695.5764855                               | 0.421192758                      | 0.049288695                                      | 0.002071102                                         | 38.98735777                            |
| 1076.716846                               | 0.500897666                      | 0.050497167                                      | 0.004373539                                         | 56.35483871                            |
| 1555.668127                               | 0.428035631                      | 0.050715058                                      | 0.002702734                                         | 92.60569551                            |
| 253.597786                                | 0.46483705                       | 0.051810297                                      | 0.013560782                                         | 14.04059041                            |
| 51.54237288                               | 0.440298507                      | 0.060040218                                      | 0.029455127                                         | 3.542372881                            |
| 173.1800948                               | 0.424547284                      | 0.054109297                                      | 0.005588533                                         | 11.41706161                            |
| 1126.058726                               | 0.353095794                      | 0.056307088                                      | 0.002696288                                         | 68.07526882                            |
| 277.174216                                | 0.347037485                      | 0.065837876                                      | 0.016489696                                         | 18.89547038                            |
| 1731.06325                                | 0.479979063                      | 0.043723369                                      | 0.003011166                                         | 80.18865867                            |
| 248.4254545                               | 0.465313029                      | 0.045791736                                      | 0.011914429                                         | 12.59272727                            |
| 1821.60274                                | 0.290970412                      | 0.061215233                                      | 0.002083514                                         | 116.1865121                            |
| 423.6825397                               | 0.57337884                       | 0.040194318                                      | 0.0054742                                           | 20.25793651                            |
| 633.4054726                               | 0.366621067                      | 0.056858122                                      | 0.003426012                                         | 45.71393035                            |
| 443.5206897                               | 0.448569219                      | 0.037978597                                      | 0.003379534                                         | 22.02758621                            |
| 260.9726962                               | 0.35995086                       | 0.058067071                                      | 0.00765611                                          | 17.01365188                            |
| 232.1333333                               | 0.272417707                      | 0.077534722                                      | 0.020009922                                         | 18.60833333                            |
| 696.3872679                               | 0.355828221                      | 0.062390504                                      | 0.007372307                                         | 47.04244032                            |
| 2230.883624                               | 0.439211391                      | 0.042694939                                      | 0.001583035                                         | 102.7240233                            |
| 1164.600666                               | 0.388996764                      | 0.050556338                                      | 0.006963025                                         | 60.7687188                             |
| 645.6666667                               | 0.247162212                      | 0.060380796                                      | 0.007693028                                         | 40.75703704                            |
| 77.09876543                               | 0.373271889                      | 0.076969974                                      | 0.076314521                                         | 6.234567901                            |
| 524.7128028                               | 0.372182872                      | 0.055069982                                      | 0.003854158                                         | 31.83044983                            |
| 181.0280374                               | 0.543147208                      | 0.047995458                                      | 0.008208751                                         | 10.27102804                            |
| 1182.475329                               | 0.380356584                      | 0.053294343                                      | 0.003397494                                         | 64.80592105                            |
| 173.2474227                               | 0.434977578                      | 0.056488468                                      | 0.008112212                                         | 10.95876289                            |
| 872.1927195                               | 0.464445549                      | 0.048012509                                      | 0.001853275                                         | 44.84368308                            |
| 994.746531                                | 0.355592105                      | 0.05754                                          | 0.005580948                                         | 62.20074006                            |
| 389.2431762                               | 0.356953056                      | 0.058180273                                      | 0.006984335                                         | 23.44665012                            |
| 1379.885675                               | 0.280959752                      | 0.059843362                                      | 0.004495409                                         | 86.89256198                            |
| 1633.057143                               | 0.255360334                      | 0.067420548                                      | 0.003042741                                         | 115.6262391                            |
| 2840.90764                                | 0.3208061                        | 0.048609222                                      | 0.001930238                                         | 143.1541596                            |
| 524.1168831                               | 0.551971326                      | 0.039556628                                      | 0.002621223                                         | 24.36688312                            |
| 539.7712                                  | 0.559534467                      | 0.04224256                                       | 0.003616818                                         | 26.4016                                |
| 256.5789474                               | 0.467213115                      | 0.049504463                                      | 0.007273856                                         | 14.10877193                            |
| 608.8441558                               | 0.392857143                      | 0.052291624                                      | 0.00490749                                          | 36.23809524                            |
| 1063.001715                               | 0.409697822                      | 0.047258075                                      | 0.004814276                                         | 55.10291595                            |
| 191.6806723                               | 0.472222222                      | 0.049219688                                      | 0.008762055                                         | 11.71428571                            |
| 651.3636364                               | 0.590604027                      | 0.038746046                                      | 0.006211884                                         | 30.68686869                            |
| 1268.986726                               | 0.485673352                      | 0.043716988                                      | 0.003039845                                         | 59.28023599                            |
| 45.28571429                               | 0.386206897                      | 0.079081633                                      | 0.01550457                                          | 4.428571429                            |
| 1204.58132                                | 0.366263639                      | 0.059437404                                      | 0.008061985                                         | 73.82125604                            |
| 1591.487805                               | 0.34441198                       | 0.054012993                                      | 0.002406918                                         | 101.8685048                            |
| 293.1063123                               | 0.38688946                       | 0.055175991                                      | 0.009974373                                         | 16.60797342                            |
| 695.7758621                               | 0.523195876                      | 0.039642432                                      | 0.00705183                                          | 32.18965517                            |
| 95.31067961                               | 0.56284153                       | 0.043453671                                      | 0.014141882                                         | 4.475728155                            |
| 42.17391304                               | 0.438095238                      | 0.079395085                                      | 0.020804345                                         | 3.652173913                            |
| 1290.456352                               | 0.354465409                      | 0.05520478                                       | 0.00337934                                          | 77.78353442                            |
| 336.3636364                               | 0.498583569                      | 0.044679752                                      | 0.005584792                                         | 15.72727273                            |
| 477.3707865                               | 0.522504892                      | 0.043498997                                      | 0.008344854                                         | 23.22846442                            |
| 1231.940015                               | 0.32200489                       | 0.054220598                                      | 0.003601422                                         | 71.40850418                            |
| 1735.940594                               | 0.313124354                      | 0.055872034                                      | 0.002732546                                         | 101.5753575                            |
| 95.44642857                               | 0.442687747                      | 0.059311224                                      | 0.014247039                                         | 6.642857143                            |
| 515.7219153                               | 0.446546053                      | 0.050971853                                      | 0.00578194                                          | 27.67771639                            |
| 47.33962264                               | 0.430894309                      | 0.058027768                                      | 0.024257365                                         | 3.075471698                            |
| 106.3834586                               | 0.350923483                      | 0.074792244                                      | 0.010704261                                         | 9.947368421                            |
| 236.1119691                               | 0.32094176                       | 0.054665255                                      | 0.008304337                                         | 14.15830116                            |

| wavelet.HLH_gldzm_HighIntensityLargeDistanceEmphasis | wavelet.HLH_gldzm_SmallDistanceEmphasis | wavelet.HLH_gldzm_SumVariance | wavelet.HLH_gldzm_Homogeneity1 | wavelet.HLH_gldzm_Homogeneity2 |
|------------------------------------------------------|-----------------------------------------|-------------------------------|--------------------------------|--------------------------------|
| 250.6073826                                          | 0.987416107                             | 645.3136364                   | 0.323657092                    | 0.235795987                    |
| 422.2328859                                          | 0.972818792                             | 1083.603348                   | 0.355520613                    | 0.276147734                    |
| 542.624                                              | 0.961                                   | 1339.473199                   | 0.248975505                    | 0.155310717                    |
| 440.5385281                                          | 0.954545455                             | 1085.38751                    | 0.294245304                    | 0.204551882                    |
| 99.28828829                                          | 0.97972973                              | 191.1294062                   | 0.386615507                    | 0.300988148                    |
| 310.1509434                                          | 0.963207547                             | 758.1957876                   | 0.31049764                     | 0.219943512                    |
| 471.575419                                           | 0.907821229                             | 920.5669068                   | 0.267866718                    | 0.175279981                    |
| 851.4735849                                          | 0.932075472                             | 2069.769584                   | 0.238946425                    | 0.148483912                    |
| 286.4404762                                          | 0.990178571                             | 751.2386821                   | 0.309378736                    | 0.217755655                    |
| 502.6255743                                          | 0.977029096                             | 1312.49174                    | 0.304902411                    | 0.215095355                    |
| 331.784264                                           | 0.965736041                             | 798.6517778                   | 0.288246039                    | 0.195087401                    |
| 540.4935806                                          | 0.957203994                             | 1359.967572                   | 0.280557157                    | 0.192238034                    |
| 831.4285714                                          | 0.984087694                             | 2566.893651                   | 0.334415207                    | 0.244294054                    |
| 249.3930348                                          | 0.975746269                             | 640.4870278                   | 0.337981679                    | 0.251358808                    |
| 296.4457831                                          | 0.954819277                             | 747.2257978                   | 0.338490931                    | 0.247159871                    |
| 280.0570175                                          | 0.970394737                             | 763.5011028                   | 0.508557528                    | 0.453983083                    |
| 189.140625                                           | 0.9531125                               | 380.3709786                   | 0.383204077                    | 0.298313626                    |
| 423.8151261                                          | 0.978391357                             | 1093.220059                   | 0.343356186                    | 0.257989504                    |
| 241.828125                                           | 0.96484375                              | 554.4472694                   | 0.298022207                    | 0.204142671                    |
| 329.607565                                           | 0.983156028                             | 876.5062686                   | 0.396713944                    | 0.321033072                    |
| 494.6513158                                          | 0.970843301                             | 1362.192918                   | 0.381821949                    | 0.303437321                    |
| 723.3795424                                          | 0.945491252                             | 1827.684667                   | 0.293429936                    | 0.200184264                    |
| 209.5379189                                          | 0.977513228                             | 553.385682                    | 0.448674805                    | 0.375822298                    |
| 478.9448819                                          | 0.908464567                             | 899.1178024                   | 0.261311828                    | 0.168182934                    |
| 716.3054475                                          | 0.966439689                             | 1995.038823                   | 0.320361249                    | 0.235346422                    |
| 309.4285714                                          | 0.985119048                             | 844.1714682                   | 0.342577167                    | 0.256418071                    |
| 507.3811075                                          | 0.959446254                             | 1222.001021                   | 0.289219562                    | 0.19927201                     |
| 489.9846626                                          | 0.982745399                             | 1275.961859                   | 0.295909504                    | 0.209237491                    |
| 649.6980256                                          | 0.985191638                             | 1763.239998                   | 0.269722811                    | 0.184048084                    |
| 608.6956078                                          | 0.970888662                             | 1686.490519                   | 0.35081045                     | 0.27193222                     |
| 468.3454058                                          | 0.985412475                             | 1243.052412                   | 0.288354625                    | 0.199244035                    |
| 705.2165874                                          | 0.986529319                             | 2190.480259                   | 0.375652909                    | 0.294410527                    |
| 1221.973176                                          | 0.975858369                             | 3700.822246                   | 0.275573999                    | 0.18668715                     |
| 406.1014493                                          | 0.923913043                             | 905.2107715                   | 0.222354974                    | 0.129879165                    |
| 295.7978142                                          | 0.942622951                             | 626.7437485                   | 0.252590035                    | 0.159710678                    |
| 325.2107969                                          | 0.960475578                             | 760.4207234                   | 0.319618887                    | 0.230599938                    |
| 694.1054482                                          | 0.984182777                             | 1973.99412                    | 0.328485786                    | 0.243890663                    |
| 650.0251188                                          | 0.977087576                             | 1845.481948                   | 0.295610046                    | 0.208232808                    |
| 370.9153005                                          | 0.93852459                              | 897.6703193                   | 0.305156104                    | 0.21012378                     |
| 436.5252294                                          | 0.987958716                             | 1213.009206                   | 0.316326496                    | 0.228399523                    |
| 608.5490909                                          | 0.964545455                             | 1656.185372                   | 0.331367749                    | 0.246621038                    |
| 265.2602339                                          | 0.978070175                             | 651.9319087                   | 0.325110259                    | 0.234902196                    |
| 371.3028286                                          | 0.975041597                             | 990.4707359                   | 0.323400774                    | 0.233533774                    |
| 381.2371365                                          | 0.939597315                             | 852.446962                    | 0.291444577                    | 0.198604812                    |
| 1613.477876                                          | 0.951643489                             | 4712.421112                   | 0.299511871                    | 0.208584353                    |
| 459.1236559                                          | 0.98655914                              | 1311.219408                   | 0.279771054                    | 0.188656983                    |
| 739.6971522                                          | 0.939622125                             | 1838.675975                   | 0.295030567                    | 0.204475457                    |
| 253.7121771                                          | 0.975092251                             | 649.7491481                   | 0.299055886                    | 0.206575829                    |
| 259.1016949                                          | 0.949152542                             | 658.8131325                   | 0.314570307                    | 0.222157844                    |
| 426.7914692                                          | 0.925355545                             | 912.6370282                   | 0.294359582                    | 0.19975527                     |
| 705.5417701                                          | 0.973325062                             | 2050.70094                    | 0.349345275                    | 0.265178528                    |
| 166.2473868                                          | 0.986933798                             | 366.7092449                   | 0.348600616                    | 0.258063841                    |
| 669.5741549                                          | 0.978326063                             | 1807.29292                    | 0.276398715                    | 0.185579761                    |
| 552.2763636                                          | 0.961818182                             | 1429.132165                   | 0.287466664                    | 0.198168315                    |
| 667.8661749                                          | 0.984589041                             | 2047.507562                   | 0.404644088                    | 0.331731094                    |
| 625.8115079                                          | 0.93452381                              | 1481.536177                   | 0.233696508                    | 0.144821285                    |
| 763.7375622                                          | 0.909514925                             | 1686.060626                   | 0.331020556                    | 0.242917022                    |
| 1106.708621                                          | 0.897844828                             | 2519.219473                   | 0.277049062                    | 0.186347565                    |
| 397.5290102                                          | 0.956484642                             | 990.8363045                   | 0.345053276                    | 0.260158589                    |
| 129.075                                              | 0.9875                                  | 311.7603863                   | 0.393894229                    | 0.311258167                    |
| 293.0888594                                          | 0.970159151                             | 743.5522004                   | 0.345642998                    | 0.258484058                    |
| 1193.149626                                          | 0.971633416                             | 3435.837754                   | 0.304647578                    | 0.219497314                    |
| 399.6497504                                          | 0.988144759                             | 1059.878419                   | 0.338963047                    | 0.25798748                     |
| 369.4088889                                          | 0.983333333                             | 973.3460419                   | 0.435416083                    | 0.3680565                      |
| 91.80246914                                          | 0.981481481                             | 142.1047919                   | 0.356852424                    | 0.266582074                    |
| 490.9031142                                          | 0.96366782                              | 1237.210735                   | 0.346705805                    | 0.262368231                    |
| 543.6448598                                          | 0.936915888                             | 1226.792818                   | 0.245855682                    | 0.152937344                    |
| 550.1472039                                          | 0.989514803                             | 1669.448702                   | 0.330716502                    | 0.243746226                    |
| 485.2268041                                          | 0.957474227                             | 1231.066358                   | 0.294192273                    | 0.199808371                    |
| 997.4539615                                          | 0.974304069                             | 2905.868711                   | 0.291405373                    | 0.201893219                    |
| 373.640148                                           | 0.968778908                             | 978.9203209                   | 0.352172954                    | 0.266067121                    |
| 417.528536                                           | 0.986972705                             | 1249.6147                     | 0.330236348                    | 0.239213093                    |
| 404.6329201                                          | 0.98088843                              | 1107.758671                   | 0.408621009                    | 0.334395124                    |
| 516.2577259                                          | 0.981632653                             | 1526.498025                   | 0.427186119                    | 0.355822933                    |
| 862.1008489                                          | 0.986502547                             | 2585.506139                   | 0.360848195                    | 0.279687907                    |
| 1388.488636                                          | 0.939123377                             | 3742.940779                   | 0.228874891                    | 0.140103426                    |
| 1027.1168                                            | 0.9448                                  | 2690.038236                   | 0.240792088                    | 0.149758849                    |
| 549.9263158                                          | 0.960526316                             | 1397.964144                   | 0.278803438                    | 0.186900195                    |
| 581.5555556                                          | 0.951298701                             | 1510.539391                   | 0.317465134                    | 0.227532922                    |
| 491.2735849                                          | 0.965265866                             | 1264.511794                   | 0.314271297                    | 0.225595297                    |
| 529.3361345                                          | 0.918067227                             | 1101.762449                   | 0.284375078                    | 0.195078495                    |
| 704.0505051                                          | 0.926136364                             | 1531.527912                   | 0.226213161                    | 0.138349954                    |
| 771.1187316                                          | 0.975110619                             | 2144.908883                   | 0.287335606                    | 0.196990926                    |
| 175.8035714                                          | 0.919642857                             | 318.6879938                   | 0.370802851                    | 0.286647594                    |
| 268.6038647                                          | 0.98852657                              | 740.2219518                   | 0.343983933                    | 0.257230176                    |
| 855.4077413                                          | 0.93597561                              | 2200.067397                   | 0.336009237                    | 0.247823064                    |
| 302.7973422                                          | 0.990033223                             | 872.1711447                   | 0.311941119                    | 0.220880245                    |
| 522.8128079                                          | 0.941810345                             | 1266.98604                    | 0.255333425                    | 0.165592313                    |
| 516.3980583                                          | 0.970873786                             | 1213.814809                   | 0.27560359                     | 0.190450828                    |
| 147.4565217                                          | 0.967391304                             | 260.8942281                   | 0.333287346                    | 0.243186607                    |
| 561.338538                                           | 0.966997871                             | 1523.847238                   | 0.3510032                      | 0.268419248                    |
| 687.1477273                                          | 0.982954545                             | 1981.208276                   | 0.261635486                    | 0.17001345                     |
| 399.9325843                                          | 0.957865169                             | 934.8856624                   | 0.254300677                    | 0.162147394                    |
| 588.9134396                                          | 0.974943052                             | 1653.320021                   | 0.365686082                    | 0.28552932                     |
| 620.0143014                                          | 0.982673267                             | 1862.773594                   | 0.368299381                    | 0.287226859                    |
| 417.5625                                             | 0.939732143                             | 974.8800336                   | 0.31102558                     | 0.219097964                    |
| 493.1418048                                          | 0.980662983                             | 1331.463776                   | 0.294263492                    | 0.202938111                    |
| 355.2830189                                          | 0.95754717                              | 973.6207152                   | 0.298218411                    | 0.205259044                    |
| 237.6691729                                          | 0.915413534                             | 462.4910877                   | 0.349468903                    | 0.259093716                    |
| 530.5405405                                          | 0.965250965                             | 1379.389556                   | 0.398066966                    | 0.324818805                    |











| wavelet.HLH_firstorder_Skewness | wavelet.HLH_firstorder_Uniformity | wavelet.HLH_firstorder_MeanAbsoluteDeviation | wavelet.HLH_firstorder_Energy | wavelet.HLH_firstorder_RobustMeanAbsoluteDeviation |
|---------------------------------|-----------------------------------|----------------------------------------------|-------------------------------|----------------------------------------------------|
| 0.092356257                     | 0.079107448                       | 74.43900358                                  | 6829061.366                   | 48.06892702                                        |
| 0.040523883                     | 0.091367985                       | 69.60738698                                  | 20949858.57                   | 40.13757249                                        |
| -0.255901843                    | 0.055055321                       | 108.5490159                                  | 8137027.546                   | 75.27538125                                        |
| -0.082364393                    | 0.074462948                       | 80.78986176                                  | 31806998.94                   | 50.38241672                                        |
| 0.223026115                     | 0.114795819                       | 50.72033213                                  | 1557347.964                   | 33.76347477                                        |
| 0.204872918                     | 0.078077344                       | 76.26816351                                  | 6602887.889                   | 48.878536                                          |
| 1.142579876                     | 0.061469239                       | 101.4087408                                  | 7034324.398                   | 62.47461578                                        |
| 0.091236263                     | 0.051691029                       | 111.0762474                                  | 20526185.66                   | 74.24948178                                        |
| 0.254273278                     | 0.079748214                       | 73.48501548                                  | 19975995.15                   | 47.48707462                                        |
| 0.0597379                       | 0.070587826                       | 83.17108202                                  | 38573849.73                   | 53.48494854                                        |
| -0.118318545                    | 0.063809255                       | 90.2438576                                   | 11236859.69                   | 61.41111558                                        |
| 0.125014565                     | 0.065902845                       | 92.8059772                                   | 24111600.47                   | 57.09708548                                        |
| 0.019114406                     | 0.08758575                        | 67.46026116                                  | 17605850.39                   | 43.2439699                                         |
| 0.032612271                     | 0.083697889                       | 72.20477049                                  | 10692398.62                   | 44.99593709                                        |
| 0.000622095                     | 0.094858426                       | 60.75949232                                  | 5594903.502                   | 41.1780851                                         |
| -0.188979231                    | 0.204708649                       | 33.49353273                                  | 20984741.71                   | 16.18753613                                        |
| 0.397610055                     | 0.108270868                       | 54.73484028                                  | 3879176.129                   | 34.8249226                                         |
| 0.146580656                     | 0.090357072                       | 69.03390728                                  | 22188257.51                   | 40.80992932                                        |
| 0.197378229                     | 0.071385553                       | 81.89095847                                  | 6380638.438                   | 55.67876008                                        |
| 0.282841251                     | 0.104858634                       | 62.91776451                                  | 22867153.92                   | 36.1988626                                         |
| -0.092515341                    | 0.110349014                       | 58.08078668                                  | 35618568.19                   | 34.02234707                                        |
| -0.092595733                    | 0.065948486                       | 86.81695855                                  | 21701227.11                   | 58.50172773                                        |
| 0.002976278                     | 0.148693661                       | 39.40434209                                  | 7947159.013                   | 24.69403695                                        |
| 0.0111993                       | 0.059383388                       | 98.0517688                                   | 7574031.598                   | 66.59327161                                        |
| -0.386986173                    | 0.070867043                       | 87.74195589                                  | 18078139.34                   | 52.89253323                                        |
| -0.336637314                    | 0.072498733                       | 82.41828069                                  | 7991237.505                   | 54.28352756                                        |
| 0.234082324                     | 0.062069951                       | 94.35878254                                  | 54761612.33                   | 60.82252887                                        |
| 0.115966102                     | 0.055251818                       | 104.1787646                                  | 26425244.6                    | 73.16132383                                        |
| 0.280014091                     | 0.043559935                       | 135.8166098                                  | 56896664.59                   | 88.7570503                                         |
| -0.036933886                    | 0.091606874                       | 72.21823573                                  | 27542661.69                   | 41.11043209                                        |
| 0.67078417                      | 0.059293347                       | 99.55834787                                  | 57178138.79                   | 64.5549756                                         |
| -0.23103669                     | 0.099608075                       | 63.09535337                                  | 47599969.15                   | 37.23242397                                        |
| 0.208770363                     | 0.064168229                       | 95.97087491                                  | 36667572.11                   | 58.04666097                                        |
| 0.077965907                     | 0.064534024                       | 109.992486                                   | 2209325.08                    | 68.36771777                                        |
| 0.113639939                     | 0.056013209                       | 106.9953819                                  | 6117364.69                    | 73.22804654                                        |
| 0.221661873                     | 0.080693559                       | 73.37206694                                  | 19410138.4                    | 46.61249982                                        |
| -0.032643235                    | 0.068493682                       | 88.11645191                                  | 41798586.41                   | 55.12475459                                        |
| 0.137131716                     | 0.071420876                       | 85.87605151                                  | 48059016.96                   | 52.81671717                                        |
| -0.325166673                    | 0.07278712                        | 78.07421725                                  | 8491926.605                   | 53.91169537                                        |
| -0.096963137                    | 0.077947039                       | 79.33937272                                  | 12823004.97                   | 48.22599485                                        |
| 0.103629536                     | 0.076404397                       | 82.6655195                                   | 20469745.22                   | 48.64611184                                        |
| 0.348928329                     | 0.085888821                       | 69.69342675                                  | 8261027.258                   | 44.72898711                                        |
| -0.153080412                    | 0.086331544                       | 69.47464054                                  | 14741275.13                   | 43.03182626                                        |
| 0.20430926                      | 0.07363141                        | 81.00197936                                  | 11881075.28                   | 52.30588928                                        |
| -0.661137714                    | 0.072993044                       | 82.36314598                                  | 24431948.95                   | 51.22172695                                        |
| -0.091272582                    | 0.067784264                       | 86.56581683                                  | 29251310.37                   | 55.94290483                                        |
| 0.033066155                     | 0.072151415                       | 81.07807777                                  | 49784763.18                   | 52.45241504                                        |
| 0.077570747                     | 0.066930674                       | 87.33676257                                  | 7426805.492                   | 57.93567851                                        |
| -0.440384113                    | 0.083426153                       | 73.03845221                                  | 1295684.213                   | 45.78293006                                        |
| -0.026872012                    | 0.065702059                       | 88.72717877                                  | 6359085.096                   | 60.72502159                                        |
| -0.036337457                    | 0.094228856                       | 65.31470194                                  | 28303098.34                   | 39.6354011                                         |
| 0.214849                        | 0.086835037                       | 66.38655414                                  | 5888770.428                   | 45.69453047                                        |
| 0.569060508                     | 0.058920725                       | 100.9796305                                  | 71604150.98                   | 64.11431843                                        |
| 0.774314271                     | 0.068125664                       | 96.65068106                                  | 11865591.58                   | 55.74840634                                        |
| 0.132627805                     | 0.134335424                       | 52.87841206                                  | 44818007.82                   | 27.35288983                                        |
| 0.018682625                     | 0.051282549                       | 115.4336056                                  | 20049359.78                   | 75.15527592                                        |
| 0.147346554                     | 0.086224065                       | 70.65032697                                  | 21042492.92                   | 43.37298075                                        |
| 0.119026547                     | 0.050843707                       | 117.6869718                                  | 32249372.98                   | 74.6020467                                         |
| 0.14736355                      | 0.095394479                       | 65.31910663                                  | 6786205.079                   | 38.95730872                                        |
| 0.090628302                     | 0.113987948                       | 50.61349242                                  | 3833220.584                   | 33.56958766                                        |
| -0.121403462                    | 0.091200961                       | 63.87755304                                  | 15372943.22                   | 41.04763964                                        |
| 0.110941634                     | 0.06573641                        | 96.60684716                                  | 100358942                     | 57.94796294                                        |
| 0.313179821                     | 0.087163519                       | 75.52285553                                  | 37140532.45                   | 43.4026299                                         |
| 0.410864435                     | 0.136277528                       | 50.93771107                                  | 17340791.84                   | 26.50305646                                        |
| 0.169433769                     | 0.100172015                       | 57.55846049                                  | 1184436.628                   | 38.95826644                                        |
| 0.349296597                     | 0.094813064                       | 67.23698469                                  | 14415630.34                   | 39.26832719                                        |
| -0.025775201                    | 0.055154732                       | 104.7605242                                  | 6954417.685                   | 72.30079408                                        |
| -0.10163908                     | 0.081942535                       | 73.51810477                                  | 32757092.13                   | 45.43031203                                        |
| 0.148266864                     | 0.076977217                       | 76.76471189                                  | 4550089.336                   | 50.31805886                                        |
| 0.034337925                     | 0.066911203                       | 90.02988128                                  | 31296807.9                    | 56.41704951                                        |
| 0.137953365                     | 0.096477017                       | 63.67397735                                  | 23903033.08                   | 38.54256469                                        |
| -0.503632608                    | 0.086833077                       | 69.16261547                                  | 10095234.22                   | 43.27827632                                        |
| 0.408742372                     | 0.130212552                       | 52.59370396                                  | 33250016.83                   | 27.82838517                                        |
| 0.002425942                     | 0.140309728                       | 46.59890298                                  | 31411541.7                    | 26.08691034                                        |
| 0.031448707                     | 0.091100835                       | 72.72842201                                  | 104874610.3                   | 40.66284822                                        |
| 0.2312541                       | 0.048737169                       | 121.2505428                                  | 28112940.06                   | 80.82390467                                        |
| -0.350695614                    | 0.048924852                       | 118.7227877                                  | 26868895.81                   | 79.55155452                                        |
| -0.369447355                    | 0.062741199                       | 92.95352274                                  | 9002994.79                    | 61.77439838                                        |
| -0.299159595                    | 0.077011379                       | 76.87642151                                  | 18887167.67                   | 49.22245805                                        |
| -0.006046081                    | 0.065126975                       | 90.82437416                                  | 42194805.25                   | 57.67389289                                        |
| -0.122826735                    | 0.067570547                       | 89.3097442                                   | 7144688.85                    | 56.76987068                                        |
| 0.096160797                     | 0.049419974                       | 118.6332997                                  | 32539462.65                   | 77.25766584                                        |
| 0.143456078                     | 0.060804355                       | 99.61471412                                  | 51572440.7                    | 61.91888194                                        |
| 0.143644197                     | 0.120760999                       | 54.40928251                                  | 813501.2334                   | 32.07993668                                        |
| -0.066885112                    | 0.091039554                       | 65.87904161                                  | 27763964                      | 40.78206614                                        |
| -0.1358861                      | 0.083729066                       | 71.49751662                                  | 52363012.89                   | 44.74386991                                        |
| -0.022267717                    | 0.081535279                       | 73.29876595                                  | 7614233.851                   | 46.70920158                                        |
| -0.130576623                    | 0.04767377                        | 122.0408484                                  | 37444047.97                   | 83.58918138                                        |
| 0.735047324                     | 0.061542596                       | 121.3802245                                  | 5311644.795                   | 71.3272141                                         |
| 0.418146347                     | 0.105487528                       | 58.12162558                                  | 642425.7384                   | 36.77835556                                        |
| 0.272475882                     | 0.092136672                       | 66.82279987                                  | 34905239.96                   | 40.37888665                                        |
| 0.090725794                     | 0.060721938                       | 101.0832355                                  | 13783303.97                   | 63.00174102                                        |
| 0.221162421                     | 0.053354575                       | 108.0023281                                  | 19424252.71                   | 73.41174089                                        |
| -0.064561544                    | 0.099323414                       | 65.25191043                                  | 37654564.54                   | 37.26102246                                        |
| -0.001488291                    | 0.102085469                       | 61.79460562                                  | 45762454.35                   | 35.94275654                                        |
| -0.44690694                     | 0.078160884                       | 76.41325768                                  | 2647521.294                   | 49.12571229                                        |
| 0.165402103                     | 0.067877857                       | 85.94623157                                  | 15808061.04                   | 56.30082966                                        |
| -0.695179504                    | 0.07991275                        | 83.32008844                                  | 1505045.988                   | 54.13345969                                        |
| -0.140809635                    | 0.099783488                       | 58.0027528                                   | 2101791.294                   | 39.40877169                                        |
| -0.256857822                    | 0.111319941                       | 63.55706766                                  | 7551180.665                   | 34.09961287                                        |





| wavelet.HLH_firstder_Mean | wavelet.HLH_glrIm_ShortRunLowGrayLevelEmphasis | wavelet.HLH_glrIm_GrayLevelVariance | wavelet.HLH_glrIm_LowGrayLevelRunEmphasis | wavelet.HLH_glrIm_GrayLevelNonUniformityNormalized |
|---------------------------|------------------------------------------------|-------------------------------------|-------------------------------------------|----------------------------------------------------|
| 0.39270101                | 0.007885697                                    | 16.34167978                         | 0.008160873                               | 0.075618405                                        |
| -0.961585703              | 0.004246089                                    | 17.55177802                         | 0.004467816                               | 0.084071063                                        |
| -17.15437243              | 0.00542451                                     | 30.26876755                         | 0.005510526                               | 0.054212092                                        |
| -1.095953125              | 0.005060032                                    | 20.38694032                         | 0.005210105                               | 0.071029565                                        |
| 4.722216739               | 0.023780408                                    | 7.193405185                         | 0.024966403                               | 0.111283364                                        |
| 2.626865788               | 0.00705429                                     | 17.2562948                          | 0.007276974                               | 0.075889533                                        |
| -5.40350404               | 0.00920563                                     | 34.02456727                         | 0.009385965                               | 0.060379287                                        |
| 2.128037858               | 0.002990418                                    | 33.61958007                         | 0.003054319                               | 0.050960668                                        |
| 0.204211632               | 0.006389963                                    | 16.07736884                         | 0.006650895                               | 0.077569038                                        |
| -5.145092599              | 0.003711869                                    | 20.7663091                          | 0.003838548                               | 0.068583362                                        |
| -13.90735525              | 0.00848849                                     | 22.11549213                         | 0.008761326                               | 0.062559338                                        |
| 2.059076858               | 0.003801182                                    | 26.99372779                         | 0.003913746                               | 0.063521699                                        |
| -1.099855028              | 0.00185506                                     | 14.27095358                         | 0.001934694                               | 0.084675312                                        |
| -0.43427315               | 0.008010695                                    | 16.12514402                         | 0.008338751                               | 0.080085882                                        |
| 0.149302591               | 0.005841725                                    | 10.35550822                         | 0.006070065                               | 0.092330322                                        |
| -1.653553884              | 0.004417538                                    | 5.739236437                         | 0.004964026                               | 0.180763487                                        |
| 0.923808688               | 0.012358688                                    | 9.547319357                         | 0.012965136                               | 0.103541786                                        |
| -1.570613769              | 0.004191497                                    | 16.29100758                         | 0.004387735                               | 0.085343351                                        |
| 5.76454465                | 0.010267267                                    | 18.03114161                         | 0.010546352                               | 0.069943842                                        |
| 3.747930844               | 0.004717915                                    | 14.32791917                         | 0.005042744                               | 0.093989724                                        |
| -0.538199864              | 0.002688021                                    | 11.97696465                         | 0.002878777                               | 0.10033473                                         |
| -0.40028279               | 0.002609754                                    | 21.00511895                         | 0.002699153                               | 0.06474951                                         |
| -0.547115011              | 0.006019744                                    | 5.147876118                         | 0.006540023                               | 0.139551718                                        |
| 8.084004118               | 0.008182275                                    | 26.11662561                         | 0.008377632                               | 0.058382467                                        |
| -4.533037177              | 0.003081943                                    | 25.24297996                         | 0.003174485                               | 0.067804928                                        |
| -2.605484481              | 0.008362411                                    | 19.12596264                         | 0.008637302                               | 0.070488998                                        |
| 1.413737385               | 0.003850096                                    | 26.19271112                         | 0.003990475                               | 0.060535255                                        |
| -33.90698968              | 0.003786091                                    | 28.45083252                         | 0.003930818                               | 0.054144619                                        |
| -13.6419535               | 0.004349813                                    | 52.53888992                         | 0.00446475                                | 0.042740337                                        |
| 0.794740195               | 0.002732074                                    | 18.93991489                         | 0.002872885                               | 0.082674879                                        |
| 0.8630482                 | 0.004015425                                    | 29.69867815                         | 0.004148047                               | 0.058094421                                        |
| -2.416525014              | 0.001774299                                    | 13.86555733                         | 0.001886407                               | 0.09358191                                         |
| 3.19908049                | 0.001514306                                    | 30.18696304                         | 0.001557518                               | 0.061762646                                        |
| -3.889059555              | 0.018799112                                    | 34.70905149                         | 0.018891512                               | 0.063437177                                        |
| -1.943357955              | 0.014471427                                    | 29.92311905                         | 0.01475472                                | 0.055230466                                        |
| 2.17118643                | 0.006428007                                    | 16.22027797                         | 0.006674536                               | 0.077438944                                        |
| -5.378686824              | 0.002339885                                    | 24.25367191                         | 0.002444274                               | 0.066238853                                        |
| 0.655407269               | 0.002643972                                    | 24.12098901                         | 0.002739707                               | 0.068070811                                        |
| -18.18701844              | 0.006102587                                    | 16.25894011                         | 0.006273354                               | 0.071558486                                        |
| -0.718997086              | 0.004470542                                    | 20.59160664                         | 0.004618729                               | 0.074593153                                        |
| -2.897451822              | 0.003185285                                    | 23.5352034                          | 0.003309949                               | 0.072960969                                        |
| 1.101249823               | 0.007240214                                    | 14.39301311                         | 0.007557949                               | 0.083219133                                        |
| 1.3951974                 | 0.005131258                                    | 15.15426739                         | 0.005364578                               | 0.082988427                                        |
| -0.284954202              | 0.005855909                                    | 19.11978114                         | 0.006039585                               | 0.071749898                                        |
| -0.002249727              | 0.001331797                                    | 21.76078971                         | 0.00136953                                | 0.070402449                                        |
| -3.985938313              | 0.003473624                                    | 21.73129671                         | 0.003571106                               | 0.065716413                                        |
| -0.482214222              | 0.002253812                                    | 19.53334958                         | 0.002342249                               | 0.069857198                                        |
| -0.750039943              | 0.009586393                                    | 20.99589327                         | 0.009835583                               | 0.065517116                                        |
| 1.95969683                | 0.016233334                                    | 16.40010582                         | 0.016423037                               | 0.081644125                                        |
| -7.487679634              | 0.006528031                                    | 21.03884001                         | 0.006718506                               | 0.06476193                                         |
| 0.739629936               | 0.002013836                                    | 14.18872129                         | 0.002123487                               | 0.088514926                                        |
| -0.598954204              | 0.01192033                                     | 11.84334559                         | 0.012456008                               | 0.084836376                                        |
| -4.897348603              | 0.002481044                                    | 31.09394996                         | 0.002567604                               | 0.057492386                                        |
| 9.021209195               | 0.007107638                                    | 33.24958563                         | 0.007215295                               | 0.066143558                                        |
| -0.391045787              | 0.00185541                                     | 12.16364808                         | 0.001993771                               | 0.121621905                                        |
| -3.843890394              | 0.00454117                                     | 37.56557826                         | 0.004620676                               | 0.050208844                                        |
| 2.361641765               | 0.002630845                                    | 16.28041818                         | 0.002746091                               | 0.082878735                                        |
| -3.576468301              | 0.002444734                                    | 41.05347317                         | 0.002511035                               | 0.049701979                                        |
| 0.845692297               | 0.004970084                                    | 14.35889298                         | 0.005185223                               | 0.089055111                                        |
| 0.801504657               | 0.012360812                                    | 7.370811161                         | 0.013057902                               | 0.109172062                                        |
| 0.541823401               | 0.005489933                                    | 12.37048349                         | 0.005754697                               | 0.087335007                                        |
| 1.067151921               | 0.001275058                                    | 30.84262169                         | 0.001330672                               | 0.062431662                                        |
| -4.173452445              | 0.004790077                                    | 20.50936588                         | 0.004991485                               | 0.081145064                                        |
| -0.631392676              | 0.004380509                                    | 15.53892754                         | 0.004721376                               | 0.121160753                                        |
| 2.055645799               | 0.052453717                                    | 9.099164728                         | 0.054277182                               | 0.096901427                                        |
| 3.203479853               | 0.003610061                                    | 15.9783156                          | 0.003771107                               | 0.089479372                                        |
| -0.742411846              | 0.006112905                                    | 28.72080079                         | 0.006218354                               | 0.054659168                                        |
| 0.43176568                | 0.002526012                                    | 17.33631623                         | 0.002639306                               | 0.078595267                                        |
| 0.320931367               | 0.005247513                                    | 17.02893824                         | 0.005376088                               | 0.074987519                                        |
| -5.189809956              | 0.001905787                                    | 26.02430366                         | 0.001959931                               | 0.064719619                                        |
| 0.788606701               | 0.004190438                                    | 13.53996189                         | 0.004411418                               | 0.090720516                                        |
| 0.505540684               | 0.004284715                                    | 15.03231167                         | 0.004447989                               | 0.083712436                                        |
| 1.397394587               | 0.003263925                                    | 11.46471422                         | 0.003528943                               | 0.11673429                                         |
| -0.097381286              | 0.002272299                                    | 8.402730666                         | 0.002476813                               | 0.126394133                                        |
| 2.077376522               | 0.001488831                                    | 19.63188309                         | 0.001584939                               | 0.085042272                                        |
| 7.784217857               | 0.001956903                                    | 40.97988505                         | 0.001988663                               | 0.04792057                                         |
| -8.416253214              | 0.002726147                                    | 38.96896899                         | 0.002771619                               | 0.048396088                                        |
| 4.945726579               | 0.004855553                                    | 24.3367403                          | 0.004956577                               | 0.061496717                                        |
| 2.185762628               | 0.003335378                                    | 17.94800992                         | 0.003454207                               | 0.07443911                                         |
| 9.424800876               | 0.00377583                                     | 24.46889579                         | 0.003926639                               | 0.063236365                                        |
| -2.293072697              | 0.007931351                                    | 23.73788973                         | 0.008197935                               | 0.065678127                                        |
| 2.225768586               | 0.004890895                                    | 39.8061904                          | 0.004963191                               | 0.048458324                                        |
| -4.845334402              | 0.002356575                                    | 30.61631903                         | 0.002428967                               | 0.05927984                                         |
| 2.111339433               | 0.01959479                                     | 9.438927843                         | 0.020252276                               | 0.113852605                                        |
| -1.455738548              | 0.006214695                                    | 13.89350104                         | 0.006511415                               | 0.086823894                                        |
| -0.85937014               | 0.001851592                                    | 16.24675955                         | 0.00194925                                | 0.080418043                                        |
| 3.357346336               | 0.00623544                                     | 16.44647086                         | 0.006432863                               | 0.078830041                                        |
| 8.132347956               | 0.005662981                                    | 39.35642174                         | 0.005777309                               | 0.0469649                                          |
| 27.8160234                | 0.009763339                                    | 46.88150794                         | 0.009912457                               | 0.057931683                                        |
| 5.420919986               | 0.031903714                                    | 10.52407955                         | 0.03304729                                | 0.103235321                                        |
| -1.447288192              | 0.00259811                                     | 15.1240637                          | 0.002749877                               | 0.086347653                                        |
| -4.525774649              | 0.003790512                                    | 32.37552249                         | 0.003863495                               | 0.059327374                                        |
| -9.552845971              | 0.006560254                                    | 31.01879684                         | 0.006718117                               | 0.052529121                                        |
| -2.826916837              | 0.002503804                                    | 16.00018856                         | 0.00265003                                | 0.092145638                                        |
| -0.054960448              | 0.002048231                                    | 13.7233992                          | 0.002179703                               | 0.095013556                                        |
| -2.387812108              | 0.008519481                                    | 17.37904611                         | 0.008677472                               | 0.07626003                                         |
| -2.814031272              | 0.004073225                                    | 21.64076061                         | 0.004192855                               | 0.066325315                                        |
| -1.827769144              | 0.012840556                                    | 20.24255947                         | 0.012974542                               | 0.078746016                                        |
| 0.881948114               | 0.010474042                                    | 9.228835078                         | 0.010847424                               | 0.096994631                                        |
| 2.240046831               | 0.004411624                                    | 16.66908819                         | 0.00461851                                | 0.09921769                                         |

| wavelet.HLH_glrIm_RunVariance | wavelet.HLH_glrIm_GrayLevelNonUniformity | wavelet.HLH_glrIm_LongRunEmphasis | wavelet.HLH_glrIm_ShortRunHighGrayLevelEmphasis | wavelet.HLH_glrIm_RunLengthNonUniformity |
|-------------------------------|------------------------------------------|-----------------------------------|-------------------------------------------------|------------------------------------------|
| 0.088468457                   | 49.58520944                              | 1.248684887                       | 216.0928712                                     | 570.9339566                              |
| 0.143468012                   | 157.324212                               | 1.377395865                       | 333.9690816                                     | 1554.252351                              |
| 0.043098518                   | 22.57435468                              | 1.129901556                       | 451.0770104                                     | 383.5584455                              |
| 0.083926179                   | 174.7050041                              | 1.232168244                       | 343.2900755                                     | 2164.962594                              |
| 0.100409801                   | 36.59085609                              | 1.294629895                       | 78.18018334                                     | 277.8381379                              |
| 0.071209246                   | 45.70410625                              | 1.213050582                       | 249.3223408                                     | 530.1290948                              |
| 0.050792224                   | 19.41077103                              | 1.150229998                       | 323.5391373                                     | 293.1667653                              |
| 0.051225763                   | 48.744676                                | 1.149327682                       | 617.8261546                                     | 875.2708184                              |
| 0.078922884                   | 150.6454523                              | 1.225602789                       | 244.8935802                                     | 1707.719                                 |
| 0.076999008                   | 198.8666566                              | 1.219136097                       | 413.1446929                                     | 2558.90233                               |
| 0.06412047                    | 48.85269703                              | 1.186641293                       | 264.8260876                                     | 699.435885                               |
| 0.069392522                   | 88.6428863                               | 1.197814226                       | 431.8358726                                     | 1244.070148                              |
| 0.092616972                   | 161.9795353                              | 1.268589254                       | 722.0658292                                     | 1639.871492                              |
| 0.10823716                    | 82.46097268                              | 1.291597326                       | 213.3067282                                     | 887.1936279                              |
| 0.082427973                   | 78.32677753                              | 1.238038859                       | 238.0554059                                     | 742.1381203                              |
| 0.294372472                   | 1039.567293                              | 1.764527596                       | 212.5398112                                     | 4127.02212                               |
| 0.116555027                   | 65.39768196                              | 1.339352372                       | 132.7376519                                     | 522.4001084                              |
| 0.108734177                   | 182.2574948                              | 1.302328617                       | 335.0858852                                     | 1814.164756                              |
| 0.069287523                   | 38.3373711                               | 1.199944366                       | 198.3952791                                     | 489.3995948                              |
| 0.184263164                   | 232.7533524                              | 1.46852719                        | 269.2085054                                     | 1996.918742                              |
| 0.159248296                   | 467.8470525                              | 1.41655884                        | 398.4277754                                     | 3808.67838                               |
| 0.06981798                    | 104.6755523                              | 1.203068425                       | 547.9123753                                     | 1436.163708                              |
| 0.181614381                   | 334.1212467                              | 1.486985212                       | 170.0028175                                     | 1893.368183                              |
| 0.052882566                   | 26.73547746                              | 1.156543232                       | 300.0226097                                     | 416.0435363                              |
| 0.086129871                   | 75.90501905                              | 1.244073584                       | 584.3252721                                     | 976.4432202                              |
| 0.103386336                   | 44.77343912                              | 1.300776486                       | 269.3038032                                     | 537.1715058                              |
| 0.070402293                   | 197.0177947                              | 1.205247537                       | 391.0236391                                     | 2883.190994                              |
| 0.071476818                   | 72.77769946                              | 1.209564394                       | 416.0755387                                     | 1188.088743                              |
| 0.061225868                   | 71.45605364                              | 1.179021285                       | 558.7955386                                     | 1508.089466                              |
| 0.15818853                    | 189.7659154                              | 1.38932588                        | 492.2386952                                     | 1922.841585                              |
| 0.067515515                   | 173.8475175                              | 1.1969066                         | 393.7053189                                     | 2664.595348                              |
| 0.130764572                   | 502.0573056                              | 1.355172927                       | 613.1887359                                     | 4467.738063                              |
| 0.07098574                    | 118.0572651                              | 1.202541893                       | 1047.61384                                      | 1700.61839                               |
| 0.031850961                   | 6.397954971                              | 1.096340426                       | 293.8520811                                     | 94.92570383                              |
| 0.046380143                   | 17.53827432                              | 1.139904015                       | 230.8768114                                     | 290.7976736                              |
| 0.090179539                   | 145.1108747                              | 1.253722162                       | 246.7777861                                     | 1627.531793                              |
| 0.097487813                   | 176.2515404                              | 1.270452435                       | 581.9831856                                     | 2298.76662                               |
| 0.08654419                    | 212.7174473                              | 1.239172228                       | 549.5711498                                     | 2740.050557                              |
| 0.068904095                   | 56.2087827                               | 1.200905222                       | 284.47146                                       | 699.1926689                              |
| 0.083178386                   | 72.81224226                              | 1.238740446                       | 380.4337404                                     | 851.6820937                              |
| 0.09981943                    | 99.04274735                              | 1.279193241                       | 496.0683761                                     | 1164.056207                              |
| 0.084203994                   | 73.5702837                               | 1.2472783                         | 214.8315057                                     | 764.7042225                              |
| 0.089677734                   | 126.198667                               | 1.256523255                       | 305.9028067                                     | 1314.540677                              |
| 0.068835501                   | 69.2415659                               | 1.197733813                       | 278.884907                                      | 860.5147317                              |
| 0.075342511                   | 123.5874176                              | 1.220371982                       | 1285.828884                                     | 1540.89231                               |
| 0.062909879                   | 138.5497527                              | 1.180726796                       | 417.5054761                                     | 1897.952544                              |
| 0.074207125                   | 279.4305932                              | 1.212210447                       | 544.4025572                                     | 3540.546112                              |
| 0.062939834                   | 36.01997449                              | 1.187982548                       | 220.2100777                                     | 490.1666319                              |
| 0.056334949                   | 10.37672935                              | 1.169618643                       | 217.9571605                                     | 114.6080725                              |
| 0.06838978                    | 30.2460164                               | 1.202717667                       | 303.9238804                                     | 414.2597729                              |
| 0.11509092                    | 276.6934166                              | 1.316607825                       | 577.3492797                                     | 2645.391535                              |
| 0.092585409                   | 64.77574838                              | 1.266533361                       | 135.9933163                                     | 656.480295                               |
| 0.064788411                   | 207.3485324                              | 1.187723582                       | 552.0205868                                     | 3227.364808                              |
| 0.065360971                   | 36.86375713                              | 1.190233706                       | 449.926963                                      | 497.8069688                              |
| 0.176950148                   | 704.6993471                              | 1.451035201                       | 563.0685097                                     | 4695.22592                               |
| 0.045504663                   | 42.29988784                              | 1.134841297                       | 478.5314167                                     | 775.7129825                              |
| 0.089344938                   | 168.206595                               | 1.257573311                       | 498.6909743                                     | 1752.012922                              |
| 0.067780148                   | 60.4887017                               | 1.197246655                       | 756.2409209                                     | 1083.920089                              |
| 0.119377726                   | 66.17530105                              | 1.323843004                       | 301.5057729                                     | 629.7697622                              |
| 0.114391444                   | 87.267549                                | 1.330296322                       | 110.366896                                      | 664.1461568                              |
| 0.100860234                   | 170.3831221                              | 1.281776155                       | 238.5396546                                     | 1672.92888                               |
| 0.09398668                    | 317.5160362                              | 1.255340479                       | 976.3457226                                     | 4437.871405                              |
| 0.117835356                   | 229.7805867                              | 1.312024311                       | 336.0675909                                     | 2420.310478                              |
| 0.224559928                   | 285.4319431                              | 1.574525307                       | 286.5470395                                     | 1817.706706                              |
| 0.087402339                   | 19.52517115                              | 1.249601565                       | 63.52023348                                     | 175.2509364                              |
| 0.100178986                   | 127.9203112                              | 1.281667433                       | 378.7903104                                     | 1224.885223                              |
| 0.048017994                   | 20.60699116                              | 1.140970942                       | 395.1152824                                     | 346.2380583                              |
| 0.093299224                   | 232.6242102                              | 1.26097371                        | 495.7092186                                     | 2563.116601                              |
| 0.074425418                   | 31.40291164                              | 1.209730767                       | 380.879123                                      | 371.8906952                              |
| 0.071483915                   | 122.3786755                              | 1.203133528                       | 845.9800103                                     | 1682.60172                               |
| 0.121104308                   | 251.4400695                              | 1.326055538                       | 301.1674555                                     | 2343.661558                              |
| 0.093519366                   | 87.22875871                              | 1.268529284                       | 373.5130917                                     | 895.092184                               |
| 0.187574399                   | 530.6926963                              | 1.486376282                       | 326.1223596                                     | 3619.710408                              |
| 0.199250541                   | 740.9140754                              | 1.517122615                       | 426.9894994                                     | 4607.941789                              |
| 0.127000267                   | 706.8595051                              | 1.348024851                       | 728.3705287                                     | 6926.581411                              |
| 0.047773648                   | 51.1979548                               | 1.139208779                       | 1083.324914                                     | 982.2788359                              |
| 0.049248245                   | 51.74946909                              | 1.14122359                        | 806.3996667                                     | 984.1622842                              |
| 0.060797041                   | 35.52959076                              | 1.176494737                       | 435.4372198                                     | 520.6514295                              |
| 0.084694681                   | 122.0583668                              | 1.243003088                       | 458.9819599                                     | 1427.302663                              |
| 0.084310537                   | 167.5790325                              | 1.238512628                       | 399.0776384                                     | 2318.40608                               |
| 0.062856518                   | 31.28856217                              | 1.184325376                       | 350.1580596                                     | 427.496372                               |
| 0.042666516                   | 62.47316048                              | 1.125254019                       | 493.1537406                                     | 1194.360017                              |
| 0.063455635                   | 156.2821492                              | 1.185700629                       | 645.4043965                                     | 2360.614514                              |
| 0.101791018                   | 15.13844047                              | 1.299490812                       | 115.7313813                                     | 112.9201478                              |
| 0.100061465                   | 271.1895496                              | 1.280143558                       | 237.5739606                                     | 2679.729472                              |
| 0.102906242                   | 404.0840872                              | 1.291393276                       | 623.6174657                                     | 4275.981964                              |
| 0.079910196                   | 57.15344963                              | 1.232564367                       | 278.1590829                                     | 633.519952                               |
| 0.05263437                    | 69.43983115                              | 1.155209054                       | 415.9416279                                     | 1346.064276                              |
| 0.073620541                   | 9.986223001                              | 1.203756696                       | 420.7563078                                     | 154.4571945                              |
| 0.057974671                   | 10.26215585                              | 1.176372295                       | 101.0599212                                     | 89.28453248                              |
| 0.124213996                   | 311.9147659                              | 1.33680063                        | 443.9363182                                     | 3030.142953                              |
| 0.057823556                   | 39.7383239                               | 1.169385276                       | 600.3902942                                     | 604.9439903                              |
| 0.054212881                   | 51.07489878                              | 1.159484998                       | 313.0710834                                     | 882.6916617                              |
| 0.132380632                   | 340.4641686                              | 1.358862291                       | 480.8271888                                     | 3069.514146                              |
| 0.131718699                   | 498.3683959                              | 1.358035367                       | 526.0849126                                     | 4357.911505                              |
| 0.068743943                   | 18.16291892                              | 1.199032192                       | 306.433339                                      | 212.4555947                              |
| 0.0715125                     | 75.76027454                              | 1.205394913                       | 417.9767286                                     | 1014.094914                              |
| 0.062313406                   | 9.170802478                              | 1.179590025                       | 308.1269063                                     | 105.0216382                              |
| 0.084721725                   | 34.09730493                              | 1.247537184                       | 157.4550331                                     | 304.1526425                              |
| 0.174509507                   | 70.78431674                              | 1.458364777                       | 405.5012153                                     | 573.7221859                              |



| wavelet.HLH_glrIm_ShortRunEmphasis | wavelet.HLH_glrIm_LongRunHighGrayLevelEmphasis | wavelet.HLH_glrIm_RunPercentage | wavelet.HLH_glrIm_LongRunLowGrayLevelEmphasis | wavelet.HLH_glrIm_RunEntropy |
|------------------------------------|------------------------------------------------|---------------------------------|-----------------------------------------------|------------------------------|
| 0.94697755                         | 281.6740787                                    | 0.928742645                     | 0.009460489                                   | 4.357045538                  |
| 0.928489423                        | 488.6863066                                    | 0.900781453                     | 0.005628671                                   | 4.464685617                  |
| 0.968872283                        | 520.740483                                     | 0.959411556                     | 0.005869513                                   | 4.652325124                  |
| 0.951203489                        | 442.1470243                                    | 0.933411181                     | 0.005921415                                   | 4.516209099                  |
| 0.935335246                        | 105.3608603                                    | 0.915791729                     | 0.030339468                                   | 3.838095925                  |
| 0.951166145                        | 313.2572133                                    | 0.936475655                     | 0.00824987                                    | 4.360762069                  |
| 0.964989622                        | 377.715854                                     | 0.953891806                     | 0.0101139713                                  | 4.605644414                  |
| 0.965997985                        | 730.1282973                                    | 0.954629203                     | 0.003336493                                   | 4.790629999                  |
| 0.950798273                        | 312.1867524                                    | 0.934176934                     | 0.00782344                                    | 4.355671276                  |
| 0.952265192                        | 524.2828277                                    | 0.935938819                     | 0.004416594                                   | 4.532582342                  |
| 0.957935692                        | 325.62038                                      | 0.944191238                     | 0.009925601                                   | 4.542227865                  |
| 0.956296435                        | 536.5927647                                    | 0.941555071                     | 0.004419991                                   | 4.656268609                  |
| 0.941213739                        | 971.0463529                                    | 0.922372228                     | 0.002297839                                   | 4.284592585                  |
| 0.941970341                        | 289.6012007                                    | 0.920806385                     | 0.009944094                                   | 4.375227765                  |
| 0.948181836                        | 309.3508678                                    | 0.931267415                     | 0.007120336                                   | 4.042501369                  |
| 0.871193661                        | 428.3261916                                    | 0.827019964                     | 0.00819033                                    | 3.778850723                  |
| 0.927227265                        | 189.088407                                     | 0.904782896                     | 0.015760896                                   | 4.043020136                  |
| 0.937387261                        | 459.8759182                                    | 0.915721071                     | 0.005326606                                   | 4.376932823                  |
| 0.95605792                         | 244.9383831                                    | 0.941580756                     | 0.011823459                                   | 4.381245677                  |
| 0.916651326                        | 420.1817103                                    | 0.883695384                     | 0.006855544                                   | 4.385126897                  |
| 0.922101098                        | 606.6283407                                    | 0.892463777                     | 0.00389607                                    | 4.24520517                   |
| 0.954637725                        | 685.8910975                                    | 0.939892665                     | 0.003099239                                   | 4.53823623                   |
| 0.908838338                        | 276.4956255                                    | 0.876630144                     | 0.009301987                                   | 3.754873955                  |
| 0.963579169                        | 354.3306516                                    | 0.952023029                     | 0.009022201                                   | 4.600028023                  |
| 0.947623427                        | 763.6661006                                    | 0.929721441                     | 0.003604869                                   | 4.616574809                  |
| 0.935132975                        | 372.2927155                                    | 0.915096431                     | 0.009919845                                   | 4.518081791                  |
| 0.953800385                        | 488.4467409                                    | 0.938989747                     | 0.004607394                                   | 4.696263167                  |
| 0.952733299                        | 520.000039                                     | 0.937946213                     | 0.00457021                                    | 4.750359201                  |
| 0.959827454                        | 676.6015534                                    | 0.947221617                     | 0.004990906                                   | 5.131284663                  |
| 0.93156635                         | 723.8898925                                    | 0.902439024                     | 0.003667542                                   | 4.499535327                  |
| 0.955715169                        | 488.4875438                                    | 0.941297457                     | 0.004735316                                   | 4.741414838                  |
| 0.92953453                         | 890.5684669                                    | 0.904540148                     | 0.002448578                                   | 4.31599558                   |
| 0.955460046                        | 1311.814349                                    | 0.940217186                     | 0.001753865                                   | 4.720888036                  |
| 0.976796028                        | 330.255825                                     | 0.969674556                     | 0.01927199                                    | 4.440833858                  |
| 0.966650559                        | 268.2260382                                    | 0.956441149                     | 0.015920241                                   | 4.628788724                  |
| 0.946035136                        | 321.5342605                                    | 0.927532369                     | 0.007829419                                   | 4.386729225                  |
| 0.943741179                        | 774.0261096                                    | 0.923904915                     | 0.002904758                                   | 4.667682317                  |
| 0.949768221                        | 711.4182481                                    | 0.931654511                     | 0.003192745                                   | 4.608729098                  |
| 0.955081942                        | 358.2181957                                    | 0.940672501                     | 0.007030878                                   | 4.343654811                  |
| 0.947935269                        | 490.9121253                                    | 0.930483244                     | 0.005301184                                   | 4.474334866                  |
| 0.941322672                        | 665.8960078                                    | 0.920937272                     | 0.003901517                                   | 4.589844947                  |
| 0.944698258                        | 278.8722672                                    | 0.927597062                     | 0.008960375                                   | 4.269473808                  |
| 0.944328828                        | 403.5963098                                    | 0.926075143                     | 0.006405486                                   | 4.320317473                  |
| 0.956184286                        | 344.9610851                                    | 0.941463415                     | 0.006865902                                   | 4.421413552                  |
| 0.950334575                        | 1649.534081                                    | 0.934750553                     | 0.001536871                                   | 4.516532604                  |
| 0.959775838                        | 511.9086409                                    | 0.946209087                     | 0.004038745                                   | 4.527045844                  |
| 0.953414813                        | 688.9126445                                    | 0.937664539                     | 0.002744492                                   | 4.490885133                  |
| 0.956364113                        | 272.7379685                                    | 0.943000396                     | 0.010895115                                   | 4.494370189                  |
| 0.960315112                        | 266.2054499                                    | 0.948335247                     | 0.01722315                                    | 4.135967166                  |
| 0.953891665                        | 377.3249179                                    | 0.939637827                     | 0.007558897                                   | 4.489614476                  |
| 0.935384802                        | 807.2476881                                    | 0.912832495                     | 0.002663494                                   | 4.317013564                  |
| 0.942227961                        | 179.951743                                     | 0.923262952                     | 0.014928633                                   | 4.187411885                  |
| 0.957719177                        | 676.7509703                                    | 0.943872929                     | 0.002949673                                   | 4.769138843                  |
| 0.957063204                        | 552.2186967                                    | 0.942991019                     | 0.007689327                                   | 4.607088908                  |
| 0.91861697                         | 882.5388476                                    | 0.887463296                     | 0.002758663                                   | 4.134179916                  |
| 0.968491922                        | 556.3649268                                    | 0.958431784                     | 0.004959143                                   | 4.832902912                  |
| 0.943866962                        | 658.3494958                                    | 0.925427058                     | 0.00327434                                    | 4.349481191                  |
| 0.955774147                        | 940.0849545                                    | 0.941221964                     | 0.002806635                                   | 4.962553095                  |
| 0.935933583                        | 424.1088015                                    | 0.912492912                     | 0.00626457                                    | 4.281301379                  |
| 0.929163118                        | 156.2290835                                    | 0.907273204                     | 0.016285077                                   | 3.915164502                  |
| 0.941062632                        | 322.5484558                                    | 0.920644716                     | 0.00701585                                    | 4.229925619                  |
| 0.947711564                        | 1278.789195                                    | 0.928328699                     | 0.001601627                                   | 4.793364129                  |
| 0.939340399                        | 462.7041654                                    | 0.916056759                     | 0.006006303                                   | 4.49534926                   |
| 0.899805076                        | 492.2950578                                    | 0.862039828                     | 0.006665378                                   | 4.179715895                  |
| 0.946286971                        | 81.14195086                                    | 0.928394186                     | 0.062328516                                   | 3.913876737                  |
| 0.940639643                        | 510.6140674                                    | 0.920501263                     | 0.004531492                                   | 4.299758207                  |
| 0.967532978                        | 462.2466456                                    | 0.956852792                     | 0.006674154                                   | 4.620487684                  |
| 0.94494587                         | 657.4908127                                    | 0.925747696                     | 0.003175603                                   | 4.420823244                  |
| 0.954494842                        | 478.7218763                                    | 0.938944464                     | 0.005966913                                   | 4.313063566                  |
| 0.955475029                        | 1059.038905                                    | 0.940251693                     | 0.002206316                                   | 4.626580563                  |
| 0.935486122                        | 421.1465904                                    | 0.911589069                     | 0.005527483                                   | 4.280462162                  |
| 0.941822681                        | 498.9322725                                    | 0.922940655                     | 0.00520142                                    | 4.307469032                  |
| 0.911835137                        | 522.9154852                                    | 0.87913789                      | 0.004987615                                   | 4.170616683                  |
| 0.906925327                        | 710.4814876                                    | 0.872440097                     | 0.003608725                                   | 4.034104359                  |
| 0.930068835                        | 1044.155093                                    | 0.90534607                      | 0.002061549                                   | 4.511559698                  |
| 0.968051862                        | 1268.600596                                    | 0.957333885                     | 0.002127433                                   | 4.889347448                  |
| 0.968211486                        | 948.3964775                                    | 0.957303216                     | 0.002971565                                   | 4.870200864                  |
| 0.96027541                         | 530.3668741                                    | 0.94703657                      | 0.005405014                                   | 4.558711758                  |
| 0.946992037                        | 599.249209                                     | 0.929487179                     | 0.003996181                                   | 4.437784769                  |
| 0.948756308                        | 515.238343                                     | 0.931185469                     | 0.004623364                                   | 4.675737235                  |
| 0.958323363                        | 425.9993019                                    | 0.945054945                     | 0.009326262                                   | 4.522218561                  |
| 0.970895877                        | 565.7252219                                    | 0.961337693                     | 0.005275708                                   | 4.883637775                  |
| 0.957870286                        | 789.3034529                                    | 0.944236279                     | 0.002748168                                   | 4.748172581                  |
| 0.935880056                        | 155.4092169                                    | 0.916180371                     | 0.023320944                                   | 3.839425887                  |
| 0.941218644                        | 320.5498022                                    | 0.921058004                     | 0.007889722                                   | 4.286465375                  |
| 0.938249698                        | 856.0618133                                    | 0.917584424                     | 0.002409043                                   | 4.419027038                  |
| 0.948362049                        | 359.4882466                                    | 0.931876607                     | 0.007319606                                   | 4.328374547                  |
| 0.964175589                        | 498.2967026                                    | 0.952666534                     | 0.006275154                                   | 4.916460624                  |
| 0.957461884                        | 507.1505503                                    | 0.941572089                     | 0.0106107                                     | 4.743956822                  |
| 0.958569461                        | 120.2485586                                    | 0.946520147                     | 0.037764521                                   | 3.770333711                  |
| 0.932578124                        | 631.6273337                                    | 0.90862119                      | 0.003503652                                   | 4.367682703                  |
| 0.961244338                        | 725.6956898                                    | 0.948681663                     | 0.004178975                                   | 4.681517303                  |
| 0.963234448                        | 373.0476132                                    | 0.95137739                      | 0.007398942                                   | 4.759896465                  |
| 0.928923523                        | 697.3179648                                    | 0.90329133                      | 0.00338721                                    | 4.3664165                    |
| 0.928939261                        | 764.3442388                                    | 0.903336071                     | 0.002841325                                   | 4.297436397                  |
| 0.955857503                        | 381.3401165                                    | 0.94131955                      | 0.009384626                                   | 4.275428533                  |
| 0.954617622                        | 524.012881                                     | 0.939334514                     | 0.004732709                                   | 4.526722383                  |
| 0.959982842                        | 381.6876101                                    | 0.946841776                     | 0.01358424                                    | 4.18752447                   |
| 0.944850228                        | 207.4276121                                    | 0.927542115                     | 0.012515975                                   | 3.974129762                  |
| 0.915585767                        | 632.1898725                                    | 0.883709847                     | 0.005744816                                   | 4.332896732                  |

| wavelet.HLH_glrIm_HighGrayLevelRunEmphasis | wavelet.HLH_glrIm_RunLengthNonUniformityNormalized | wavelet.HLH_glszm_GrayLevelVariance | wavelet.HLH_glszm_SmallAreaHighGrayLevelEmphasis |
|--------------------------------------------|----------------------------------------------------|-------------------------------------|--------------------------------------------------|
| 227.7011792                                | 0.870344734                                        | 26.63199856                         | 174.266496                                       |
| 358.6666694                                | 0.830233483                                        | 32.72501239                         | 265.4419211                                      |
| 464.612103                                 | 0.9209382                                          | 39.32                               | 360.4396934                                      |
| 360.5430319                                | 0.880025471                                        | 34.27428272                         | 266.4610507                                      |
| 83.14928874                                | 0.844312041                                        | 13.12539567                         | 61.49821577                                      |
| 261.2837448                                | 0.879700336                                        | 30.36519758                         | 196.9739189                                      |
| 333.6973563                                | 0.911751573                                        | 47.83752068                         | 280.8776619                                      |
| 638.8310131                                | 0.914618566                                        | 44.40226415                         | 451.5527816                                      |
| 256.938069                                 | 0.87893711                                         | 26.07380811                         | 190.2722572                                      |
| 433.0668664                                | 0.882260067                                        | 33.6955511                          | 324.4723478                                      |
| 275.9486145                                | 0.895350105                                        | 30.86253189                         | 202.7348988                                      |
| 450.8587134                                | 0.89136285                                         | 41.85550294                         | 339.4765872                                      |
| 766.7580162                                | 0.856976559                                        | 27.80652957                         | 519.0227388                                      |
| 225.9752975                                | 0.86033377                                         | 27.36046756                         | 159.5618679                                      |
| 250.8516367                                | 0.873701479                                        | 17.65578277                         | 162.5848234                                      |
| 243.6520295                                | 0.716648373                                        | 19.23714604                         | 174.1814111                                      |
| 142.7037245                                | 0.826662179                                        | 21.27332899                         | 106.8538582                                      |
| 356.476857                                 | 0.849073422                                        | 31.21124848                         | 275.8784002                                      |
| 206.8755732                                | 0.891874626                                        | 27.12982178                         | 149.2946168                                      |
| 292.1868524                                | 0.805682058                                        | 28.50343572                         | 209.2738754                                      |
| 431.3354782                                | 0.816419225                                        | 24.13443452                         | 308.1602629                                      |
| 573.1595336                                | 0.88782165                                         | 31.07170921                         | 396.3147294                                      |
| 186.8195047                                | 0.78955863                                         | 12.29542535                         | 125.0579845                                      |
| 310.2329133                                | 0.908359623                                        | 34.83918718                         | 248.4868513                                      |
| 616.0135795                                | 0.871852287                                        | 42.07265818                         | 435.3671004                                      |
| 287.7107155                                | 0.844530362                                        | 30.45137314                         | 188.6737268                                      |
| 408.925108                                 | 0.885569496                                        | 40.07291579                         | 307.9374648                                      |
| 435.3068682                                | 0.883307141                                        | 36.24973418                         | 323.7285135                                      |
| 580.4121619                                | 0.900674444                                        | 66.66885195                         | 422.4229721                                      |
| 526.9539954                                | 0.837363856                                        | 33.99502943                         | 376.2679204                                      |
| 411.1026162                                | 0.89010908                                         | 43.08671074                         | 311.956448                                       |
| 659.1126677                                | 0.832173093                                        | 26.23582588                         | 450.6707676                                      |
| 1095.311579                                | 0.889530493                                        | 49.53371309                         | 804.9564062                                      |
| 300.9044397                                | 0.940761889                                        | 43.66477631                         | 229.9190499                                      |
| 238.0507582                                | 0.915593168                                        | 38.53014423                         | 187.9036578                                      |
| 259.9473782                                | 0.868197439                                        | 28.29009358                         | 196.3111265                                      |
| 615.1520904                                | 0.863330555                                        | 38.75752252                         | 454.0064144                                      |
| 577.7064672                                | 0.876660587                                        | 39.27198189                         | 431.9797935                                      |
| 297.88607                                  | 0.889259383                                        | 24.40109439                         | 205.9364252                                      |
| 400.2531328                                | 0.872301911                                        | 35.33069607                         | 304.6863255                                      |
| 525.6767535                                | 0.857404071                                        | 43.28373223                         | 391.0398171                                      |
| 226.5481824                                | 0.864687001                                        | 24.57498889                         | 159.6269534                                      |
| 323.259063                                 | 0.864114487                                        | 27.86771354                         | 230.2155351                                      |
| 290.93749                                  | 0.89137366                                         | 30.72574308                         | 213.3369968                                      |
| 1352.777804                                | 0.877491971                                        | 36.9622795                          | 920.8835065                                      |
| 434.6815979                                | 0.899850121                                        | 31.67645826                         | 320.299751                                       |
| 570.4794716                                | 0.884844255                                        | 32.16742015                         | 420.6645151                                      |
| 230.099667                                 | 0.891329402                                        | 31.00151142                         | 162.5564674                                      |
| 227.0057344                                | 0.901158334                                        | 28.23269176                         | 142.7931142                                      |
| 317.5560868                                | 0.886244283                                        | 28.97890883                         | 217.3754818                                      |
| 616.1425921                                | 0.845842125                                        | 26.06491841                         | 434.9491774                                      |
| 143.8998736                                | 0.859449685                                        | 19.64438077                         | 107.3600311                                      |
| 574.946179                                 | 0.894641665                                        | 46.40338142                         | 437.0213574                                      |
| 468.7033214                                | 0.89307983                                         | 55.2668562                          | 354.4364468                                      |
| 611.9857669                                | 0.809763162                                        | 27.50998972                         | 450.2603415                                      |
| 493.299755                                 | 0.920390365                                        | 50.57709751                         | 385.1495004                                      |
| 527.3258626                                | 0.863029411                                        | 30.19090493                         | 385.0275429                                      |
| 789.9055059                                | 0.890317694                                        | 60.68317182                         | 586.7376456                                      |
| 321.8063486                                | 0.846696225                                        | 27.19815024                         | 237.9903614                                      |
| 118.4656981                                | 0.830508668                                        | 15.46734375                         | 84.26533672                                      |
| 253.1082274                                | 0.857107072                                        | 21.88271218                         | 177.7628879                                      |
| 1027.927472                                | 0.872274237                                        | 49.39051374                         | 763.8062863                                      |
| 356.6933125                                | 0.854129349                                        | 35.75395971                         | 268.563553                                       |
| 317.1696031                                | 0.771101338                                        | 28.73451632                         | 241.5145561                                      |
| 66.64981533                                | 0.869092598                                        | 15.55829904                         | 51.56695113                                      |
| 401.7384698                                | 0.856291064                                        | 31.32407718                         | 315.1541478                                      |
| 407.7392223                                | 0.918070352                                        | 37.7282077                          | 311.0951273                                      |
| 523.9640822                                | 0.865701057                                        | 30.41590201                         | 367.0304818                                      |
| 398.3597984                                | 0.88758669                                         | 26.97374854                         | 300.8674605                                      |
| 884.334929                                 | 0.889623309                                        | 41.25997185                         | 632.0888457                                      |
| 321.1025967                                | 0.845164921                                        | 26.30666264                         | 239.3996399                                      |
| 395.962302                                 | 0.858569139                                        | 26.81991762                         | 266.2394061                                      |
| 356.4341794                                | 0.795444048                                        | 26.59893972                         | 269.9551339                                      |
| 470.2506241                                | 0.785390202                                        | 19.64782225                         | 330.2634456                                      |
| 781.3045968                                | 0.833041955                                        | 38.54137628                         | 570.5794817                                      |
| 1118.033204                                | 0.919240175                                        | 54.71972508                         | 840.9154061                                      |
| 832.4690818                                | 0.91996152                                         | 49.36956416                         | 604.9339809                                      |
| 452.9466208                                | 0.900909133                                        | 37.31333949                         | 328.2369885                                      |
| 484.0612167                                | 0.870152862                                        | 31.9597084                          | 353.2863296                                      |
| 419.7036599                                | 0.87440122                                         | 36.47969778                         | 306.7694717                                      |
| 364.2291626                                | 0.896699773                                        | 36.53725019                         | 287.8508951                                      |
| 506.8978488                                | 0.926183407                                        | 53.37618451                         | 408.9788443                                      |
| 672.0537053                                | 0.895106133                                        | 46.18578143                         | 516.3382591                                      |
| 122.8188291                                | 0.84755539                                         | 15.75                               | 91.8966787                                       |
| 251.9590623                                | 0.857466915                                        | 24.39777993                         | 179.7689981                                      |
| 664.3070537                                | 0.850656119                                        | 30.02714791                         | 450.117218                                       |
| 292.9717079                                | 0.873321167                                        | 29.36985243                         | 204.7114921                                      |
| 431.3559591                                | 0.910027752                                        | 50.91283457                         | 314.655075                                       |
| 435.712751                                 | 0.895485339                                        | 63.56093883                         | 397.4562265                                      |
| 104.7369776                                | 0.897274296                                        | 16.44470699                         | 81.05630318                                      |
| 475.23882                                  | 0.838497695                                        | 27.99862085                         | 340.1207877                                      |
| 623.6376029                                | 0.902973192                                        | 49.7767223                          | 464.7637747                                      |
| 324.3491786                                | 0.907612878                                        | 41.35611735                         | 244.1901639                                      |
| 516.7096103                                | 0.830549721                                        | 33.28297844                         | 376.8443131                                      |
| 565.6430316                                | 0.830617205                                        | 29.37687179                         | 407.4941308                                      |
| 320.0577819                                | 0.89123835                                         | 27.94698661                         | 216.9202365                                      |
| 437.2175043                                | 0.887579418                                        | 32.81385387                         | 324.5912049                                      |
| 321.7980376                                | 0.900856317                                        | 33.19330723                         | 194.4689999                                      |
| 166.575493                                 | 0.864984702                                        | 16.1930013                          | 110.2596441                                      |
| 441.0321861                                | 0.803447093                                        | 36.53442853                         | 327.0901949                                      |

| wavelet.HLH_glszm_GrayLevelNonUniformityNormalized | wavelet.HLH_glszm_SizeZoneNonUniformityNormalized | wavelet.HLH_glszm_SizeZoneNonUniformity | wavelet.HLH_glszm_GrayLevelNonUniformity |
|----------------------------------------------------|---------------------------------------------------|-----------------------------------------|------------------------------------------|
| 0.056438899                                        | 0.482027837                                       | 143.6442953                             | 16.81879195                              |
| 0.052965182                                        | 0.439600018                                       | 327.5020134                             | 39.4590604                               |
| 0.046624                                           | 0.50816                                           | 127.04                                  | 11.656                                   |
| 0.048437623                                        | 0.479024756                                       | 553.2735931                             | 55.94545455                              |
| 0.082217352                                        | 0.384465547                                       | 42.67567568                             | 9.126126126                              |
| 0.053214667                                        | 0.464663581                                       | 123.1358491                             | 14.10188679                              |
| 0.05159015                                         | 0.484722699                                       | 86.76536313                             | 9.234636872                              |
| 0.042684229                                        | 0.437814169                                       | 232.0415094                             | 22.62264151                              |
| 0.056697846                                        | 0.420544218                                       | 353.2571429                             | 47.62619048                              |
| 0.050348374                                        | 0.445449088                                       | 581.7565084                             | 65.75497703                              |
| 0.051263882                                        | 0.44107037                                        | 173.7817259                             | 20.19796954                              |
| 0.045292948                                        | 0.481905816                                       | 337.8159772                             | 31.75035663                              |
| 0.057743439                                        | 0.414983325                                       | 293.3932107                             | 40.82461103                              |
| 0.054045692                                        | 0.395571892                                       | 159.0199005                             | 21.72636816                              |
| 0.068950501                                        | 0.381241835                                       | 126.5722892                             | 22.89156627                              |
| 0.074213604                                        | 0.443987381                                       | 506.145614                              | 84.60350877                              |
| 0.075303819                                        | 0.398003472                                       | 76.41666667                             | 14.45833333                              |
| 0.052174051                                        | 0.447707054                                       | 372.939976                              | 43.46098439                              |
| 0.055908203                                        | 0.405090332                                       | 103.703125                              | 14.3125                                  |
| 0.054004661                                        | 0.403481269                                       | 341.3451537                             | 45.68794326                              |
| 0.059238427                                        | 0.444131888                                       | 742.5885167                             | 99.04665072                              |
| 0.050993662                                        | 0.408161232                                       | 303.2637954                             | 37.88829071                              |
| 0.090083953                                        | 0.378299102                                       | 214.4955908                             | 51.07760141                              |
| 0.048360097                                        | 0.475354951                                       | 120.7401575                             | 12.28346457                              |
| 0.046427652                                        | 0.449401202                                       | 230.9922179                             | 23.86381323                              |
| 0.052563618                                        | 0.393266566                                       | 99.1031746                              | 13.24603175                              |
| 0.045422233                                        | 0.447011215                                       | 686.162215                              | 69.72312704                              |
| 0.046605066                                        | 0.430040649                                       | 280.3865031                             | 30.38650307                              |
| 0.035831981                                        | 0.435987919                                       | 375.3855981                             | 30.85133566                              |
| 0.049998904                                        | 0.437999835                                       | 428.8018386                             | 48.94892748                              |
| 0.045902511                                        | 0.456610893                                       | 680.806841                              | 68.44064386                              |
| 0.057675999                                        | 0.406359069                                       | 769.2377179                             | 109.1806656                              |
| 0.042379672                                        | 0.473924276                                       | 441.6974249                             | 39.49785408                              |
| 0.052299937                                        | 0.536651964                                       | 37.02898551                             | 3.608695652                              |
| 0.046910926                                        | 0.426796859                                       | 78.10382514                             | 8.584699454                              |
| 0.053819364                                        | 0.43805222                                        | 340.8046272                             | 41.8714653                               |
| 0.047212295                                        | 0.444395712                                       | 505.7223199                             | 53.72759227                              |
| 0.047067168                                        | 0.480997857                                       | 708.5098439                             | 69.3299389                               |
| 0.057645794                                        | 0.443817373                                       | 162.4371585                             | 21.09836066                              |
| 0.050658615                                        | 0.468510647                                       | 204.2706422                             | 22.08715596                              |
| 0.046816529                                        | 0.477970248                                       | 262.8836364                             | 25.74909091                              |
| 0.060086864                                        | 0.3815191                                         | 130.4795322                             | 20.5497076                               |
| 0.055495417                                        | 0.414946249                                       | 249.3826955                             | 33.35274542                              |
| 0.053105716                                        | 0.435540942                                       | 194.6868009                             | 23.73825503                              |
| 0.049288695                                        | 0.437205221                                       | 345.82933                               | 38.98735777                              |
| 0.050497167                                        | 0.486567169                                       | 543.0089606                             | 56.35483871                              |
| 0.050715058                                        | 0.456479308                                       | 833.5312158                             | 92.60569551                              |
| 0.051810297                                        | 0.428847646                                       | 116.2177122                             | 14.04059041                              |
| 0.060040218                                        | 0.438092502                                       | 25.84745763                             | 3.542372881                              |
| 0.054109297                                        | 0.376429101                                       | 79.42654028                             | 11.41706161                              |
| 0.056307088                                        | 0.42421226                                        | 512.872622                              | 68.07526882                              |
| 0.065837876                                        | 0.380203717                                       | 109.1184669                             | 18.89547038                              |
| 0.043723369                                        | 0.461615623                                       | 846.6030534                             | 80.18865867                              |
| 0.045791736                                        | 0.454571901                                       | 125.0072727                             | 12.59272727                              |
| 0.061215233                                        | 0.463986827                                       | 880.6469968                             | 116.1865121                              |
| 0.040194318                                        | 0.510763102                                       | 257.4246032                             | 20.25793651                              |
| 0.056858122                                        | 0.435459518                                       | 350.1094527                             | 45.71393035                              |
| 0.037978597                                        | 0.458192628                                       | 265.7517241                             | 22.02758621                              |
| 0.058067071                                        | 0.457559203                                       | 134.0648464                             | 17.01365188                              |
| 0.077534722                                        | 0.422847222                                       | 101.4833333                             | 18.60833333                              |
| 0.062390504                                        | 0.428659879                                       | 323.2095491                             | 47.04244032                              |
| 0.042694939                                        | 0.471239123                                       | 1133.80133                              | 102.7240233                              |
| 0.050556338                                        | 0.435373933                                       | 523.3194676                             | 60.7687188                               |
| 0.060380796                                        | 0.456539918                                       | 308.1644444                             | 40.75703704                              |
| 0.076969974                                        | 0.368084134                                       | 29.81481481                             | 6.234567901                              |
| 0.055069982                                        | 0.483914225                                       | 279.7024221                             | 31.83044983                              |
| 0.047995458                                        | 0.467944799                                       | 100.1401869                             | 10.27102804                              |
| 0.053294343                                        | 0.43572271                                        | 529.8388158                             | 64.80592105                              |
| 0.056488468                                        | 0.454617919                                       | 88.19587629                             | 10.95876289                              |
| 0.048012509                                        | 0.444027438                                       | 414.7216274                             | 44.84368308                              |
| 0.05754                                            | 0.454837189                                       | 491.6790009                             | 62.20074006                              |
| 0.058180273                                        | 0.418862255                                       | 168.8014888                             | 23.44665012                              |
| 0.059843362                                        | 0.472322777                                       | 685.8126722                             | 86.89256198                              |
| 0.067420548                                        | 0.422385571                                       | 724.3912536                             | 115.6262391                              |
| 0.048609222                                        | 0.442168563                                       | 1302.186418                             | 143.1541596                              |
| 0.039556628                                        | 0.490544358                                       | 302.1753247                             | 24.36688312                              |
| 0.04224256                                         | 0.47538944                                        | 297.1184                                | 26.4016                                  |
| 0.049504463                                        | 0.461298861                                       | 131.4701754                             | 14.10877193                              |
| 0.052291624                                        | 0.454387203                                       | 314.8903319                             | 36.23809524                              |
| 0.047258075                                        | 0.439499366                                       | 512.4562607                             | 55.10291595                              |
| 0.049219688                                        | 0.484075983                                       | 115.210084                              | 11.71428571                              |
| 0.038746046                                        | 0.539871569                                       | 427.5782828                             | 30.68686869                              |
| 0.043716988                                        | 0.485540067                                       | 658.3923304                             | 59.28023599                              |
| 0.079081633                                        | 0.355229592                                       | 19.89285714                             | 4.428571429                              |
| 0.059437404                                        | 0.426829616                                       | 530.1223833                             | 73.82125604                              |
| 0.054012993                                        | 0.410900659                                       | 774.9586426                             | 101.8685048                              |
| 0.055175991                                        | 0.433339588                                       | 130.4352159                             | 16.60797342                              |
| 0.039642432                                        | 0.4761112621                                      | 386.6034483                             | 32.18965517                              |
| 0.043453671                                        | 0.644829861                                       | 66.41747573                             | 4.475728155                              |
| 0.079395085                                        | 0.371455577                                       | 17.08695652                             | 3.652173913                              |
| 0.05520478                                         | 0.429043042                                       | 604.5216466                             | 77.78353442                              |
| 0.044679752                                        | 0.461631586                                       | 162.4943182                             | 15.72727273                              |
| 0.043498997                                        | 0.484170068                                       | 258.5468165                             | 23.22846442                              |
| 0.05422058                                         | 0.458642863                                       | 604.03265                               | 71.40850418                              |
| 0.055872034                                        | 0.455653101                                       | 828.3773377                             | 101.5735375                              |
| 0.059311224                                        | 0.431600765                                       | 48.33928571                             | 6.642857143                              |
| 0.050971853                                        | 0.436389474                                       | 236.9594843                             | 27.67771639                              |
| 0.058027768                                        | 0.401210395                                       | 21.26415094                             | 3.075471698                              |
| 0.074792244                                        | 0.369664763                                       | 49.16541353                             | 9.947368421                              |
| 0.054665255                                        | 0.467002579                                       | 120.953668                              | 14.15830116                              |

| wavelet.HLH_glszm_LargeAreaEmphasis | wavelet.HLH_glszm_ZoneVariance | wavelet.HLH_glszm_ZonePercentage | wavelet.HLH_glszm_LargeAreaLowGrayLevelEmphasis | wavelet.HLH_glszm_LargeAreaHighGrayLevelEmphasis |
|-------------------------------------|--------------------------------|----------------------------------|-------------------------------------------------|--------------------------------------------------|
| 46.37583893                         | 40.76307374                    | 0.422096317                      | 0.232703817                                     | 9863.375839                                      |
| 136.6402685                         | 128.8677735                    | 0.358690419                      | 0.404662687                                     | 47048.59195                                      |
| 6.392                               | 3.78304                        | 0.576036866                      | 0.021918176                                     | 2731.224                                         |
| 63.6025974                          | 58.3978786                     | 0.438330171                      | 0.195016078                                     | 21562.85801                                      |
| 50.96396396                         | 40.50369288                    | 0.309192201                      | 0.867450731                                     | 3481.054054                                      |
| 20.41886792                         | 14.53137771                    | 0.412130638                      | 0.094450867                                     | 5053.633962                                      |
| 7.87150838                          | 4.327018508                    | 0.53115727                       | 0.043426826                                     | 2367.162011                                      |
| 6.788679245                         | 3.214439302                    | 0.528942116                      | 0.014426607                                     | 4220.371698                                      |
| 26.42261905                         | 20.29699405                    | 0.404040404                      | 0.122243483                                     | 6484.640476                                      |
| 25.43032159                         | 19.80332732                    | 0.421562298                      | 0.06666229                                      | 10645.62634                                      |
| 11.64720812                         | 7.241471051                    | 0.476420798                      | 0.065215863                                     | 3054.162437                                      |
| 21.45506419                         | 16.98554948                    | 0.473009447                      | 0.055875021                                     | 9012.875892                                      |
| 79.72842999                         | 71.12287911                    | 0.340887175                      | 0.108011724                                     | 60343.38472                                      |
| 60.66666667                         | 52.9321799                     | 0.359570662                      | 0.310437034                                     | 12743.9602                                       |
| 44.71987952                         | 37.19047576                    | 0.364434687                      | 0.20525156                                      | 10345.10241                                      |
| 7086.748246                         | 7049.61312                     | 0.164099611                      | 29.51019419                                     | 1709660.678                                      |
| 154.0833333                         | 140.867079                     | 0.275071633                      | 1.22169037                                      | 20227.03646                                      |
| 116.7755102                         | 108.938199                     | 0.357204117                      | 0.349028113                                     | 39955.06843                                      |
| 18.5546875                          | 13.38616943                    | 0.439862543                      | 0.123660557                                     | 3444.15625                                       |
| 434.9846336                         | 424.0227423                    | 0.302034988                      | 1.643503203                                     | 116196.7128                                      |
| 804.645933                          | 794.8840457                    | 0.320061256                      | 1.931582142                                     | 336496.7464                                      |
| 15.30282638                         | 9.943881793                    | 0.431976744                      | 0.030901146                                     | 8514.25572                                       |
| 1029.539683                         | 1006.340254                    | 0.207616258                      | 5.683205371                                     | 188251.9277                                      |
| 7.618110236                         | 4.032007564                    | 0.528066528                      | 0.043917319                                     | 2117.188976                                      |
| 32.85992218                         | 27.37302609                    | 0.426910299                      | 0.059819593                                     | 19506.92412                                      |
| 29.96031746                         | 22.37597632                    | 0.363112392                      | 0.134339466                                     | 8101.242063                                      |
| 28.21758958                         | 23.11911384                    | 0.44287363                       | 0.07986862                                      | 10821.01303                                      |
| 22.91257669                         | 18.08201993                    | 0.454989532                      | 0.064331731                                     | 9232.789877                                      |
| 12.62369338                         | 8.421431472                    | 0.487818697                      | 0.0343341                                       | 6686.41115                                       |
| 173.0255363                         | 166.2835834                    | 0.385129819                      | 0.349887228                                     | 86473.93667                                      |
| 15.53923541                         | 10.99327375                    | 0.469015414                      | 0.045086832                                     | 6259.152247                                      |
| 250.7279451                         | 240.9148014                    | 0.319224283                      | 0.39925632                                      | 160573.7396                                      |
| 34.52682403                         | 29.76862141                    | 0.458435809                      | 0.034189007                                     | 36534.31867                                      |
| 3.188405797                         | 0.916614157                    | 0.663461538                      | 0.034542897                                     | 961.8695652                                      |
| 5.803278689                         | 2.51192929                     | 0.551204819                      | 0.056321293                                     | 1208.005464                                      |
| 57.25449871                         | 50.51320042                    | 0.385148515                      | 0.265584442                                     | 13004.1401                                       |
| 54.93321617                         | 48.5284917                     | 0.395138889                      | 0.096233492                                     | 32799.2522                                       |
| 63.48268839                         | 58.29802432                    | 0.439177102                      | 0.117999284                                     | 35110.5465                                       |
| 16.06284153                         | 10.85796082                    | 0.438323353                      | 0.063416131                                     | 4808.210383                                      |
| 35.31880734                         | 29.53014793                    | 0.415633937                      | 0.100104465                                     | 13405.01376                                      |
| 102.4218182                         | 95.23941818                    | 0.373134328                      | 0.209673057                                     | 51473.22545                                      |
| 42.17251462                         | 34.40765535                    | 0.358866737                      | 0.221175698                                     | 8768.432749                                      |
| 71.15141431                         | 63.68697207                    | 0.366017052                      | 0.245377722                                     | 21741.95175                                      |
| 25.35346756                         | 20.09532103                    | 0.436097561                      | 0.103728226                                     | 6840.995526                                      |
| 39.40834387                         | 33.7714714                     | 0.421192758                      | 0.031269223                                     | 52248.59671                                      |
| 12.40501792                         | 8.419341992                    | 0.500897666                      | 0.032935047                                     | 5227.280466                                      |
| 45.8762322                          | 40.41814895                    | 0.428035631                      | 0.085501647                                     | 25295.45509                                      |
| 12.21771218                         | 7.589657004                    | 0.46483705                       | 0.070878452                                     | 2808.402214                                      |
| 10.6440678                          | 5.485779948                    | 0.440298507                      | 0.076512429                                     | 2368.033898                                      |
| 13.72985782                         | 8.181712001                    | 0.424547284                      | 0.060807495                                     | 4024.7109                                        |
| 162.5376344                         | 154.5168857                    | 0.353095794                      | 0.274789744                                     | 97039.14392                                      |
| 42.86759582                         | 34.56436281                    | 0.347037485                      | 0.409921523                                     | 5166.428571                                      |
| 19.75845147                         | 15.41779504                    | 0.479979063                      | 0.039568934                                     | 10644.39313                                      |
| 19.16727273                         | 14.54868099                    | 0.465313029                      | 0.057324493                                     | 8128.709091                                      |
| 1421.364067                         | 1409.552641                    | 0.290970412                      | 2.407609215                                     | 840969.3235                                      |
| 8.200396825                         | 5.158694728                    | 0.57337884                       | 0.022915599                                     | 3846.916667                                      |
| 108.7350746                         | 101.2952077                    | 0.366621067                      | 0.230338912                                     | 52289.76368                                      |
| 19.03275862                         | 14.06293401                    | 0.448569219                      | 0.028826554                                     | 14546.0069                                       |
| 92.8668942                          | 85.1487379                     | 0.35995086                       | 0.308090848                                     | 28801.46416                                      |
| 168.3041667                         | 154.8291493                    | 0.272417707                      | 1.56759643                                      | 18824.30417                                      |
| 123.8421751                         | 115.944137                     | 0.355828221                      | 0.52038721                                      | 30197.91379                                      |
| 164.364921                          | 159.1810665                    | 0.439211391                      | 0.173568023                                     | 156901.4401                                      |
| 74.27787022                         | 67.66929217                    | 0.388996764                      | 0.223054519                                     | 25762.90765                                      |
| 882.6444444                         | 866.2749278                    | 0.247162212                      | 2.922907964                                     | 268330.2622                                      |
| 29.9382716                          | 22.76116446                    | 0.373271889                      | 0.766099382                                     | 1684.950617                                      |
| 125.8771626                         | 118.6579932                    | 0.372182872                      | 0.335072321                                     | 48067.05017                                      |
| 6.943925234                         | 3.554196873                    | 0.543147208                      | 0.027104928                                     | 2685.471963                                      |
| 68.71299342                         | 61.80076434                    | 0.380356584                      | 0.139821358                                     | 34563.22122                                      |
| 19.11340206                         | 13.82814327                    | 0.434977578                      | 0.057788183                                     | 7311.206186                                      |
| 26.54282655                         | 21.90696573                    | 0.464445549                      | 0.033149562                                     | 22603.50642                                      |
| 209.3432007                         | 201.4346705                    | 0.355592105                      | 0.716247051                                     | 61834.76781                                      |
| 50.2853598                          | 42.43702012                    | 0.356953056                      | 0.147327353                                     | 18194.87841                                      |
| 1392.987603                         | 1380.319495                    | 0.280959752                      | 4.120693567                                     | 472738.1563                                      |
| 1220.700875                         | 1205.365545                    | 0.255360334                      | 2.662668446                                     | 561359.2554                                      |
| 653.3005093                         | 643.5838995                    | 0.3208061                        | 0.874757296                                     | 489536.5165                                      |
| 6.873376623                         | 3.591162085                    | 0.551971326                      | 0.008521871                                     | 7428.516234                                      |
| 6.7856                              | 3.59151616                     | 0.559534467                      | 0.011674356                                     | 5501.1536                                        |
| 12.70175439                         | 8.120652508                    | 0.467213115                      | 0.037011445                                     | 5410.873684                                      |
| 34.56277056                         | 28.08343172                    | 0.392857143                      | 0.080028086                                     | 15903.89322                                      |
| 62.32246998                         | 56.36485147                    | 0.409697822                      | 0.169694065                                     | 24009.90995                                      |
| 13.12605042                         | 8.641621354                    | 0.472222222                      | 0.062006017                                     | 4285.176471                                      |
| 6.559343434                         | 3.692478765                    | 0.590604027                      | 0.019893793                                     | 3072.559343                                      |
| 19.79941003                         | 15.55994118                    | 0.485673352                      | 0.035289495                                     | 12063.06047                                      |
| 16.58928571                         | 9.884885204                    | 0.386206897                      | 0.190830328                                     | 1817.571429                                      |
| 121.2101449                         | 113.7557502                    | 0.366263639                      | 0.530557706                                     | 28536.82045                                      |
| 164.5387063                         | 156.1083971                    | 0.34441198                       | 0.256294983                                     | 106719.5376                                      |
| 29.90033223                         | 23.21956711                    | 0.38688946                       | 0.120722071                                     | 8163.933555                                      |
| 9.63546798                          | 5.982285423                    | 0.523195876                      | 0.03181034                                      | 4229.270936                                      |
| 11.42718447                         | 8.270525026                    | 0.56284153                       | 0.048345595                                     | 3932.524272                                      |
| 10.5                                | 5.289697543                    | 0.438095238                      | 0.222986143                                     | 940.7826087                                      |
| 140.1284599                         | 132.169574                     | 0.354465409                      | 0.304853547                                     | 65194.8396                                       |
| 9.846590909                         | 5.823831353                    | 0.498583569                      | 0.021397657                                     | 5943.693182                                      |
| 7.973782772                         | 4.31093156                     | 0.522504892                      | 0.037149202                                     | 2412.052434                                      |
| 358.5755505                         | 348.9311538                    | 0.32200489                       | 0.716440809                                     | 180737.5277                                      |
| 642.8349835                         | 632.6357789                    | 0.313124354                      | 1.167724564                                     | 355302.3361                                      |
| 17.11607143                         | 12.01313134                    | 0.442687747                      | 0.071790539                                     | 5060.955357                                      |
| 16.3388582                          | 11.323898                      | 0.446546053                      | 0.044868603                                     | 6895.780847                                      |
| 12.28301887                         | 6.897116412                    | 0.430894309                      | 0.060426758                                     | 4112.54717                                       |
| 31.93233083                         | 23.81197354                    | 0.350923483                      | 0.217808809                                     | 5235.503759                                      |
| 159.7876448                         | 150.0792475                    | 0.32094176                       | 0.396031918                                     | 65888.70656                                      |

| wavelet.HLH_glszm_HighGrayLevelZoneEmphasis | wavelet.HLH_glszm_SmallAreaEmphasis | wavelet.HLH_glszm_LowGrayLevelZoneEmphasis | wavelet.HLH_glszm_ZoneEntropy | wavelet.HLH_glszm_SmallAreaLowGrayLevelEmphasis |
|---------------------------------------------|-------------------------------------|--------------------------------------------|-------------------------------|-------------------------------------------------|
| 236.2013423                                 | 0.721654522                         | 0.011423952                                | 5.614897033                   | 0.009585442                                     |
| 378.3355705                                 | 0.689513462                         | 0.006349599                                | 6.153513758                   | 0.00525962                                      |
| 480.32                                      | 0.740725237                         | 0.007331245                                | 5.759033628                   | 0.006580767                                     |
| 368.008658                                  | 0.719570897                         | 0.007527944                                | 6.071865241                   | 0.006539406                                     |
| 94.61261261                                 | 0.643575036                         | 0.034568883                                | 5.113563449                   | 0.022572539                                     |
| 275.8490566                                 | 0.707999527                         | 0.01075292                                 | 5.80680743                    | 0.009360993                                     |
| 365.2346369                                 | 0.723011602                         | 0.012512772                                | 5.619255881                   | 0.010756776                                     |
| 649.5622642                                 | 0.687575185                         | 0.004008411                                | 6.238606469                   | 0.003391776                                     |
| 272.6011905                                 | 0.67415854                          | 0.008011999                                | 6.10954009                    | 0.00597512                                      |
| 453.5689127                                 | 0.694199768                         | 0.00523064                                 | 6.258522545                   | 0.004348247                                     |
| 286.213198                                  | 0.69042482                          | 0.010244968                                | 6.001347608                   | 0.006696693                                     |
| 463.2467903                                 | 0.721526192                         | 0.005189498                                | 6.172216469                   | 0.00436294                                      |
| 771.7765205                                 | 0.669568846                         | 0.002922099                                | 6.069700072                   | 0.002456218                                     |
| 234.8781095                                 | 0.652605248                         | 0.011934786                                | 5.997896703                   | 0.008984066                                     |
| 254.8343373                                 | 0.639226909                         | 0.008582045                                | 5.715641055                   | 0.006856896                                     |
| 250.7307018                                 | 0.693053287                         | 0.007522277                                | 5.801657869                   | 0.005968642                                     |
| 156.65625                                   | 0.654212481                         | 0.022882753                                | 5.525514249                   | 0.01099536                                      |
| 380.8967587                                 | 0.695756647                         | 0.006209864                                | 6.117614195                   | 0.005122389                                     |
| 221.6015625                                 | 0.660060333                         | 0.015204195                                | 5.862303452                   | 0.012943484                                     |
| 312.9799054                                 | 0.660297089                         | 0.007066873                                | 6.215480478                   | 0.005563986                                     |
| 441.0316986                                 | 0.693134299                         | 0.003596814                                | 6.005231178                   | 0.002778455                                     |
| 588.0444145                                 | 0.663743852                         | 0.003547501                                | 6.21833532                    | 0.002853641                                     |
| 191.7231041                                 | 0.638017943                         | 0.008929525                                | 5.649503652                   | 0.00648998                                      |
| 333.4212598                                 | 0.716327372                         | 0.010601297                                | 5.834695539                   | 0.008640712                                     |
| 625.0038911                                 | 0.697071757                         | 0.004790792                                | 6.177929875                   | 0.00421156                                      |
| 294.6428571                                 | 0.650497067                         | 0.014975561                                | 6.008849491                   | 0.013271985                                     |
| 430.0260586                                 | 0.695398904                         | 0.005003791                                | 6.372301149                   | 0.003942759                                     |
| 461.1027607                                 | 0.68152135                          | 0.00478621                                 | 6.198576383                   | 0.003734228                                     |
| 609.7049942                                 | 0.686276137                         | 0.005882824                                | 6.597588117                   | 0.004863451                                     |
| 542.9836568                                 | 0.688156903                         | 0.003940132                                | 6.179823726                   | 0.003261243                                     |
| 431.739772                                  | 0.702815215                         | 0.00521725                                 | 6.373909934                   | 0.004238049                                     |
| 671.6856841                                 | 0.662822435                         | 0.002387686                                | 6.272823966                   | 0.001801823                                     |
| 1114.729614                                 | 0.715765252                         | 0.002171855                                | 6.268755311                   | 0.001886372                                     |
| 301.057971                                  | 0.761022544                         | 0.025751408                                | 5.153824414                   | 0.024795017                                     |
| 259.1256831                                 | 0.675242898                         | 0.018773692                                | 5.854708361                   | 0.01494443                                      |
| 278.1169666                                 | 0.688461052                         | 0.009520161                                | 6.066229983                   | 0.007934987                                     |
| 643.2346221                                 | 0.69336617                          | 0.003197133                                | 6.341457245                   | 0.002574319                                     |
| 594.1575017                                 | 0.721206989                         | 0.003638279                                | 6.161477711                   | 0.003055603                                     |
| 298.0956284                                 | 0.692545613                         | 0.009032271                                | 5.80285807                    | 0.007743986                                     |
| 421.146789                                  | 0.71162415                          | 0.00674352                                 | 5.983900182                   | 0.00587559                                      |
| 544.3109091                                 | 0.717945049                         | 0.005037663                                | 6.11546731                    | 0.00438266                                      |
| 243.9093567                                 | 0.638485648                         | 0.010530271                                | 5.905464356                   | 0.008247568                                     |
| 336.890183                                  | 0.668337102                         | 0.006656535                                | 6.072399047                   | 0.004107984                                     |
| 304.787472                                  | 0.685469773                         | 0.008174299                                | 5.970497741                   | 0.006746133                                     |
| 1348.116308                                 | 0.687496648                         | 0.002114683                                | 6.160972859                   | 0.001873912                                     |
| 438.6962366                                 | 0.72511525                          | 0.004434414                                | 6.039933047                   | 0.003652266                                     |
| 585.3959474                                 | 0.702645591                         | 0.002834448                                | 6.161330946                   | 0.002211986                                     |
| 233.7749077                                 | 0.680210334                         | 0.013879605                                | 5.840452226                   | 0.011585363                                     |
| 222.3389831                                 | 0.684488004                         | 0.029853957                                | 5.016212279                   | 0.028427561                                     |
| 336.3080569                                 | 0.634608765                         | 0.009782742                                | 5.957226008                   | 0.008188381                                     |
| 633.2043011                                 | 0.677362508                         | 0.002744182                                | 6.126893182                   | 0.002159471                                     |
| 159.4111498                                 | 0.639077445                         | 0.017014989                                | 5.829177223                   | 0.012969193                                     |
| 603.1472192                                 | 0.706589865                         | 0.003053604                                | 6.381730294                   | 0.002420668                                     |
| 494.2836364                                 | 0.700723767                         | 0.012046569                                | 6.040904974                   | 0.01126673                                      |
| 628.5864067                                 | 0.708381433                         | 0.002562666                                | 6.049455758                   | 0.002025429                                     |
| 507.7222222                                 | 0.742502616                         | 0.005996965                                | 6.074762138                   | 0.005262806                                     |
| 552.2338308                                 | 0.686015453                         | 0.003767567                                | 6.037387895                   | 0.00308819                                      |
| 818.9258621                                 | 0.703793075                         | 0.003598036                                | 6.461055369                   | 0.003117774                                     |
| 332.552901                                  | 0.702406559                         | 0.007815415                                | 5.727651026                   | 0.006630556                                     |
| 123.8875                                    | 0.675133116                         | 0.0020179243                               | 5.373821034                   | 0.016378728                                     |
| 259.6312997                                 | 0.680298799                         | 0.007576234                                | 5.859851591                   | 0.005894276                                     |
| 1061.296758                                 | 0.713807925                         | 0.001625066                                | 6.392794052                   | 0.001313733                                     |
| 378.5274542                                 | 0.68609992                          | 0.007005914                                | 6.282481726                   | 0.005663085                                     |
| 338.5466667                                 | 0.702586195                         | 0.007801385                                | 5.943059547                   | 0.006620312                                     |
| 77.20987654                                 | 0.624423228                         | 0.076410461                                | 5.074055867                   | 0.054611404                                     |
| 423.2681661                                 | 0.72307033                          | 0.005252723                                | 5.863908672                   | 0.004404371                                     |
| 423.0981308                                 | 0.710964654                         | 0.008494275                                | 5.802564096                   | 0.007512076                                     |
| 534.0049342                                 | 0.686311391                         | 0.003449794                                | 6.178517754                   | 0.002761739                                     |
| 418.3608247                                 | 0.701006589                         | 0.008261434                                | 5.682070763                   | 0.007351193                                     |
| 902.751606                                  | 0.692731797                         | 0.002716837                                | 6.23538812                    | 0.002330614                                     |
| 334.3237743                                 | 0.701415807                         | 0.005898647                                | 5.971299821                   | 0.004757592                                     |
| 400.853598                                  | 0.672810769                         | 0.007033252                                | 5.996423445                   | 0.006020837                                     |
| 375.1205234                                 | 0.714637756                         | 0.004576176                                | 5.954656322                   | 0.003634857                                     |
| 481.0081633                                 | 0.675719214                         | 0.003090779                                | 5.991366161                   | 0.002316677                                     |
| 815.1429542                                 | 0.691701385                         | 0.001949493                                | 6.421168587                   | 0.001501249                                     |
| 1141.577922                                 | 0.728177474                         | 0.002712266                                | 6.238446642                   | 0.002435151                                     |
| 840.824                                     | 0.716656238                         | 0.003711027                                | 6.194534945                   | 0.003272375                                     |
| 463.9894737                                 | 0.706135051                         | 0.007410984                                | 5.894442696                   | 0.006617574                                     |
| 495.979798                                  | 0.700757328                         | 0.005085346                                | 6.04480207                    | 0.004362397                                     |
| 437.4408233                                 | 0.689490352                         | 0.005105951                                | 6.300796769                   | 0.004059431                                     |
| 388.3361345                                 | 0.72266537                          | 0.009242474                                | 5.798317952                   | 0.005168912                                     |
| 526.0542929                                 | 0.762955776                         | 0.006502146                                | 6.152467876                   | 0.005874537                                     |
| 699.5612094                                 | 0.724498352                         | 0.00309837                                 | 6.289490522                   | 0.00260425                                      |
| 136.75                                      | 0.614366553                         | 0.033255658                                | 4.909771663                   | 0.02868007                                      |
| 259.9782609                                 | 0.679364917                         | 0.008169715                                | 6.071881716                   | 0.00540023                                      |
| 671.9750795                                 | 0.666590316                         | 0.002533967                                | 6.331372406                   | 0.001917236                                     |
| 297.4152824                                 | 0.684091546                         | 0.010005215                                | 5.880127064                   | 0.008714212                                     |
| 432.9901478                                 | 0.717351409                         | 0.007763058                                | 6.286443124                   | 0.006640499                                     |
| 476.8737864                                 | 0.825259873                         | 0.014233984                                | 5.345596314                   | 0.013573854                                     |
| 118.6304348                                 | 0.626471262                         | 0.037145665                                | 4.691721467                   | 0.016522491                                     |
| 489.7452094                                 | 0.681308299                         | 0.00347095                                 | 6.191310867                   | 0.00269001                                      |
| 642.3948864                                 | 0.706385985                         | 0.005622835                                | 6.140762899                   | 0.004985061                                     |
| 336.0505618                                 | 0.723134426                         | 0.008659191                                | 6.108185337                   | 0.007340749                                     |
| 533.2824601                                 | 0.704162972                         | 0.00366505                                 | 6.173019013                   | 0.003012995                                     |
| 576.5456546                                 | 0.70180442                          | 0.002774818                                | 6.121653342                   | 0.002187094                                     |
| 327.6696429                                 | 0.682317319                         | 0.014444151                                | 5.401129816                   | 0.013373819                                     |
| 455.4456722                                 | 0.686858758                         | 0.002583992                                | 6.092239344                   | 0.004918843                                     |
| 305.754717                                  | 0.656424673                         | 0.002446398                                | 5.156889087                   | 0.02318173                                      |
| 169.7293233                                 | 0.629266576                         | 0.017297549                                | 5.479202471                   | 0.014444927                                     |
| 463.2200772                                 | 0.709353464                         | 0.008392493                                | 5.781759169                   | 0.007657085                                     |

| wavelet.HLH_ngtdm_Coarseness | wavelet.HLH_ngtdm_Complexity | wavelet.HLH_ngtdm_Strength | wavelet.HLH_ngtdm_Busyness | wavelet.HLH_ngtdm_Contrast | wavelet.HHH_gldm_GrayLevelVariance |
|------------------------------|------------------------------|----------------------------|----------------------------|----------------------------|------------------------------------|
| 0.009438667                  | 1.03141833                   | 1.585150807                | 0.270625401                | 0.000226136                | 18.10501047                        |
| 0.00369243                   | 0.76143033                   | 1.67411536                 | 0.281358598                | 3.29E-05                   | 15.83281969                        |
| 0.013741314                  | 3.363437535                  | 4.254590086                | 0.112898524                | 0.00057689                 | 33.30931322                        |
| 0.002711685                  | 0.628171642                  | 0.960481565                | 0.444750985                | 4.16E-05                   | 16.55352578                        |
| 0.018594152                  | 0.589750919                  | 1.588514207                | 0.34085068                 | 0.000268574                | 9.531723062                        |
| 0.010625024                  | 1.442388107                  | 2.539170161                | 0.188076924                | 0.00020444                 | 13.18466365                        |
| 0.020712999                  | 6.307749993                  | 11.29494819                | 0.064922015                | 0.000536524                | 32.27864998                        |
| 0.006618908                  | 2.170654743                  | 2.564469806                | 0.165213169                | 0.000221783                | 23.7729531                         |
| 0.003220573                  | 0.656097132                  | 1.163298649                | 0.467772558                | 4.21E-05                   | 11.06095981                        |
| 0.002266502                  | 0.658967845                  | 1.237078649                | 0.418142841                | 2.72E-05                   | 17.5857763                         |
| 0.008147398                  | 1.601760639                  | 2.562421688                | 0.207315131                | 0.000169673                | 28.24935922                        |
| 0.00491035                   | 1.622909976                  | 2.440901381                | 0.192986421                | 8.28E-05                   | 49.73843977                        |
| 0.00327065                   | 0.77606679                   | 1.940681994                | 0.219796766                | 2.75E-05                   | 16.64464221                        |
| 0.006358217                  | 0.913033856                  | 1.839061375                | 0.286112296                | 8.72E-05                   | 24.94038678                        |
| 0.006823694                  | 0.651311676                  | 1.288323566                | 0.348814851                | 0.00010904                 | 6.17260438                         |
| 0.001020359                  | 0.090262853                  | 0.555057369                | 1.246501833                | 2.20E-06                   | 3.603262266                        |
| 0.009665161                  | 0.820268624                  | 2.13601922                 | 0.289769715                | 0.000103306                | 7.029203373                        |
| 0.003155242                  | 0.580230588                  | 1.322386906                | 0.357551527                | 2.94E-05                   | 18.09499131                        |
| 0.010394568                  | 1.589902946                  | 2.217873201                | 0.244292157                | 0.000280266                | 15.25268065                        |
| 0.00288701                   | 0.335715086                  | 1.011072302                | 0.474565333                | 2.10E-05                   | 12.31062222                        |
| 0.001441202                  | 0.253133693                  | 0.651977943                | 0.656959311                | 8.61E-06                   | 6.566206059                        |
| 0.003937305                  | 0.902183934                  | 1.590640436                | 0.264872741                | 6.65E-05                   | 24.58073418                        |
| 0.002509589                  | 1.043536542                  | 0.569271482                | 0.88790114                 | 1.11E-05                   | 2.189946022                        |
| 0.012890116                  | 3.138846341                  | 3.83731707                 | 0.135038335                | 0.000411515                | 25.74943919                        |
| 0.006093158                  | 1.597882608                  | 3.064830664                | 0.136442259                | 9.12E-05                   | 24.45350148                        |
| 0.010145329                  | 1.332595541                  | 2.749124179                | 0.176923917                | 0.000180501                | 17.62746971                        |
| 0.002097566                  | 0.68588858                   | 1.226164462                | 0.466962852                | 2.98E-05                   | 27.40956798                        |
| 0.004751006                  | 1.083688667                  | 1.627836754                | 0.308063788                | 0.000129606                | 35.87212593                        |
| 0.004435682                  | 2.153473189                  | 3.285745685                | 0.182840994                | 0.000108307                | 69.33272685                        |
| 0.00303963                   | 0.761137971                  | 1.592352049                | 0.264725561                | 2.75E-05                   | 10.82792826                        |
| 0.002279246                  | 1.179641167                  | 2.281656913                | 0.349342807                | 2.87E-05                   | 29.46543082                        |
| 0.001311257                  | 0.267489737                  | 0.893996834                | 0.517817403                | 6.73E-06                   | 7.62361912                         |
| 0.003524054                  | 1.796912547                  | 2.81315509                 | 0.141240321                | 5.37E-05                   | 37.63678014                        |
| 0.048926927                  | 13.52498452                  | 13.51716206                | 0.045089705                | 0.003967799                | 31.09282544                        |
| 0.018423726                  | 3.701019262                  | 4.595818267                | 0.137090273                | 0.000848878                | 55.37112607                        |
| 0.003370028                  | 0.567871912                  | 0.99869745                 | 0.491565761                | 4.84E-05                   | 10.71930693                        |
| 0.002638253                  | 0.77730978                   | 1.753783694                | 0.275990798                | 2.78E-05                   | 32.93393121                        |
| 0.00215361                   | 0.987270383                  | 1.744363344                | 0.303121706                | 2.31E-05                   | 18.27496472                        |
| 0.007713224                  | 1.137578483                  | 1.995674411                | 0.238143251                | 0.000145096                | 30.07200545                        |
| 0.006682193                  | 1.566353198                  | 2.837519008                | 0.16857711                 | 9.94E-05                   | 20.64225314                        |
| 0.005137986                  | 1.430893257                  | 3.024180414                | 0.15494116                 | 5.61E-05                   | 20.18462394                        |
| 0.006999904                  | 0.891248172                  | 1.831409168                | 0.305879982                | 0.000113246                | 10.91964955                        |
| 0.004264014                  | 0.722412734                  | 1.399250411                | 0.314622221                | 4.97E-05                   | 11.98069591                        |
| 0.006607956                  | 1.17200837                   | 1.979607434                | 0.248422564                | 0.000120452                | 16.56288971                        |
| 0.003814527                  | 1.113487837                  | 2.392155854                | 0.148459664                | 5.32E-05                   | 20.72057629                        |
| 0.002953582                  | 0.805515232                  | 1.104709295                | 0.385712655                | 5.67E-05                   | 15.93002637                        |
| 0.001573693                  | 0.523411112                  | 0.83447897                 | 0.516223424                | 2.00E-05                   | 14.55377324                        |
| 0.012088108                  | 1.734882968                  | 2.991250988                | 0.181607789                | 0.000267854                | 21.90343318                        |
| 0.043529353                  | 4.368533211                  | 7.408239849                | 0.069202018                | 0.001518947                | 7.981342284                        |
| 0.01445148                   | 1.903479731                  | 3.952676487                | 0.128366561                | 0.000283961                | 24.30486339                        |
| 0.002132509                  | 0.419802932                  | 1.002562864                | 0.3888428                  | 1.72E-05                   | 12.09111732                        |
| 0.007819228                  | 0.727145058                  | 1.561649452                | 0.403636666                | 0.000123061                | 21.86936363                        |
| 0.00187083                   | 1.028686265                  | 1.813050436                | 0.340318723                | 2.32E-05                   | 36.83405163                        |
| 0.011510278                  | 4.552239658                  | 7.953718189                | 0.079281777                | 0.000242082                | 27.56563913                        |
| 0.00120172                   | 0.305764888                  | 1.191223524                | 0.466156747                | 3.73E-06                   | 11.7389008                         |
| 0.007286352                  | 2.931712546                  | 2.933907589                | 0.156554478                | 0.000278975                | 23.97025786                        |
| 0.003179255                  | 0.730781963                  | 1.614064464                | 0.281430645                | 3.14E-05                   | 13.13996967                        |
| 0.005891619                  | 2.536117247                  | 4.57212908                 | 0.115530384                | 0.000117097                | 41.3820674                         |
| 0.008824087                  | 1.075060258                  | 2.208708652                | 0.182390227                | 0.00011828                 | 10.1340319                         |
| 0.007200048                  | 0.393701015                  | 0.856210334                | 0.545934476                | 8.86E-05                   | 4.240718098                        |
| 0.003192412                  | 0.37470166                   | 0.735859921                | 0.592959756                | 4.15E-05                   | 7.974391564                        |
| 0.001434464                  | 0.811268954                  | 1.76590702                 | 0.284746238                | 1.27E-05                   | 26.57913092                        |
| 0.002532313                  | 0.719121731                  | 1.658219609                | 0.369074115                | 2.27E-05                   | 14.38187126                        |
| 0.002846281                  | 0.344492605                  | 1.355906658                | 0.422198524                | 1.55E-05                   | 6.321193356                        |
| 0.030277741                  | 0.97397039                   | 2.111222699                | 0.298848348                | 0.000746722                | 8.255346259                        |
| 0.004773714                  | 0.936267096                  | 2.162540677                | 0.219345848                | 4.43E-05                   | 9.017053175                        |
| 0.015271019                  | 3.968511543                  | 4.437976222                | 0.110870724                | 0.00063282                 | 23.79033214                        |
| 0.002202127                  | 0.591184086                  | 1.28136023                 | 0.367678341                | 1.98E-05                   | 13.74255834                        |
| 0.014908555                  | 1.711787788                  | 2.947321216                | 0.132192578                | 0.000372735                | 14.83703674                        |
| 0.003480582                  | 1.589571168                  | 2.968036373                | 0.154044685                | 4.12E-05                   | 30.11215639                        |
| 0.002340167                  | 0.396483696                  | 0.902765818                | 0.531842352                | 2.04E-05                   | 13.64275623                        |
| 0.005999849                  | 1.0384855                    | 2.326867884                | 0.199285989                | 6.77E-05                   | 15.25655616                        |
| 0.001453327                  | 0.224331613                  | 0.696081615                | 0.701895125                | 7.44E-06                   | 3.541020736                        |
| 0.001118308                  | 0.13584139                   | 0.493945098                | 0.850194048                | 4.45E-06                   | 4.655270423                        |
| 0.000871669                  | 0.278020123                  | 0.899158526                | 0.571247951                | 4.42E-06                   | 17.60064073                        |
| 0.005559032                  | 3.455012384                  | 3.728450315                | 0.113908879                | 0.000191337                | 27.03743127                        |
| 0.006225475                  | 2.927231021                  | 3.842754189                | 0.113225307                | 0.000161238                | 23.32486381                        |
| 0.010802396                  | 2.407966312                  | 3.568844585                | 0.123700326                | 0.000275103                | 19.14829347                        |
| 0.004009069                  | 0.808411561                  | 1.669409579                | 0.261037289                | 4.97E-05                   | 14.38570445                        |
| 0.002665077                  | 0.670742275                  | 1.371659898                | 0.379127892                | 3.39E-05                   | 40.78572236                        |
| 0.012989832                  | 2.641966241                  | 3.599834693                | 0.119873133                | 0.000354472                | 9.003905266                        |
| 0.004849457                  | 2.501545752                  | 2.362192608                | 0.202329523                | 0.000165992                | 23.45983414                        |
| 0.002548674                  | 1.174398566                  | 1.982103698                | 0.255509549                | 3.72E-05                   | 36.71314467                        |
| 0.044181411                  | 1.715987749                  | 3.81592516                 | 0.120570289                | 0.001002765                | 3.93274673                         |
| 0.002105077                  | 0.368065233                  | 0.815373297                | 0.675800416                | 1.95E-05                   | 7.217242617                        |
| 0.001351223                  | 0.348329263                  | 0.925215819                | 0.505949796                | 9.45E-06                   | 15.32403966                        |
| 0.008523383                  | 1.407551324                  | 2.455323554                | 0.196769684                | 0.000151207                | 8.665723859                        |
| 0.004426798                  | 1.593986983                  | 2.096873629                | 0.265099559                | 0.000137914                | 54.388641                          |
| 0.034980884                  | 11.77840789                  | 13.59556153                | 0.042697175                | 0.002054356                | 30.27023799                        |
| 0.054205209                  | 2.492888335                  | 4.778943348                | 0.135840337                | 0.002043                   | 9.425306122                        |
| 0.001824554                  | 0.487957304                  | 1.260435918                | 0.450505889                | 1.29E-05                   | 15.76070149                        |
| 0.009382898                  | 3.98906007                   | 5.687338647                | 0.088746192                | 0.000229057                | 50.01023401                        |
| 0.006678808                  | 1.798497072                  | 2.325452695                | 0.240404518                | 0.000195411                | 35.59557447                        |
| 0.001855053                  | 0.467627754                  | 1.194787884                | 0.39253392                 | 1.17E-05                   | 21.38123899                        |
| 0.001283147                  | 0.309423793                  | 0.865051322                | 0.549776831                | 7.00E-06                   | 15.99112361                        |
| 0.025259639                  | 3.077684089                  | 5.038094719                | 0.08307603                 | 0.000684966                | 15.50691309                        |
| 0.005646443                  | 1.500307423                  | 2.811041925                | 0.192722344                | 8.64E-05                   | 29.36799837                        |
| 0.04468394                   | 5.852968876                  | 8.75709793                 | 0.051558483                | 0.002075462                | 7.014078921                        |
| 0.016605457                  | 0.991511042                  | 1.999469683                | 0.216915248                | 0.00028826                 | 9.927332725                        |
| 0.00929453                   | 1.541953441                  | 3.881300057                | 0.111851326                | 9.32E-05                   | 8.787149001                        |

| wavelet.HHH_gldm_HighGrayLevelEmphasis | wavelet.HHH_gldm_GrayLevelNonUniformityNormalized | wavelet.HHH_gldm_DependenceEntropy | wavelet.HHH_gldm_DependenceNonUniformity |
|----------------------------------------|---------------------------------------------------|------------------------------------|------------------------------------------|
| 479.3810198                            | 0.086241764                                       | 6.093858949                        | 135.4674221                              |
| 320.4588349                            | 0.103043652                                       | 6.376085479                        | 299.3880597                              |
| 445.6612903                            | 0.05670114                                        | 6.02826046                         | 139.202765                               |
| 323.1157495                            | 0.079994671                                       | 6.249645332                        | 538.2736243                              |
| 84.62674095                            | 0.092465142                                       | 5.760025174                        | 71.17827298                              |
| 252.2068429                            | 0.089517691                                       | 5.973835197                        | 123.6189736                              |
| 672.8041543                            | 0.056274159                                       | 6.046555301                        | 97.63501484                              |
| 365.9860279                            | 0.062228836                                       | 6.154291864                        | 262.9700599                              |
| 391.4141414                            | 0.10097424                                        | 6.021097566                        | 365.7195767                              |
| 439.2663008                            | 0.079264992                                       | 6.262501478                        | 625.4144609                              |
| 739.2744861                            | 0.060817716                                       | 6.213613982                        | 206.1535671                              |
| 1042.583671                            | 0.057007072                                       | 6.598270648                        | 352.7840756                              |
| 945.2483124                            | 0.084690929                                       | 6.168394287                        | 392.6673095                              |
| 892.6064401                            | 0.075009361                                       | 6.376363073                        | 222.2075134                              |
| 115.9275521                            | 0.122921338                                       | 5.736123258                        | 146.8375412                              |
| 214.1810854                            | 0.230377634                                       | 5.747480705                        | 589.2035411                              |
| 217.6532951                            | 0.119276525                                       | 5.802604523                        | 106.9541547                              |
| 476.0403087                            | 0.09750573                                        | 6.398226683                        | 370.1020583                              |
| 320.5412371                            | 0.079575111                                       | 5.960297325                        | 126.5051546                              |
| 318.8543377                            | 0.107645673                                       | 6.333850221                        | 417.2106391                              |
| 216.6663476                            | 0.134495505                                       | 6.101747439                        | 653.5669985                              |
| 579.4023256                            | 0.063636425                                       | 6.32138404                         | 419.9139535                              |
| 44.46136946                            | 0.211961717                                       | 5.556652945                        | 275.528744                               |
| 408.964657                             | 0.061492646                                       | 6.167991706                        | 119.2661123                              |
| 400.0855482                            | 0.069472191                                       | 6.475677107                        | 254.39701                                |
| 257.6541787                            | 0.075106512                                       | 6.294501402                        | 133.9769452                              |
| 1508.393537                            | 0.067660155                                       | 6.467697759                        | 738.9590306                              |
| 593.893231                             | 0.063494375                                       | 6.450222667                        | 331.8918353                              |
| 1147.850425                            | 0.049276377                                       | 6.906243125                        | 415.6594901                              |
| 472.2663257                            | 0.128282927                                       | 6.262040493                        | 318.7356412                              |
| 899.3164517                            | 0.068007937                                       | 6.484273726                        | 683.7845234                              |
| 313.5726813                            | 0.134256432                                       | 6.096725205                        | 773.5642496                              |
| 3002.661584                            | 0.070599254                                       | 6.449096529                        | 431.8047221                              |
| 318.1346154                            | 0.06693787                                        | 5.273730137                        | 34.36538462                              |
| 525.0331325                            | 0.045706924                                       | 6.150640115                        | 111.1084337                              |
| 316.9693069                            | 0.104278992                                       | 6.109089031                        | 318.619802                               |
| 1027.613542                            | 0.068925781                                       | 6.692929648                        | 545.7131944                              |
| 1011.088551                            | 0.088542628                                       | 6.382806082                        | 590.881932                               |
| 388.845509                             | 0.061281509                                       | 6.374125888                        | 201.8023952                              |
| 525.884652                             | 0.082303633                                       | 6.26189412                         | 200.2793136                              |
| 665.7720488                            | 0.076154015                                       | 6.272631527                        | 303.8276798                              |
| 280.5960126                            | 0.099940652                                       | 6.029999021                        | 163.9989507                              |
| 431.7813642                            | 0.096729279                                       | 6.030398112                        | 283.4336175                              |
| 402.7141463                            | 0.080591077                                       | 6.198107672                        | 200.5082927                              |
| 440.4904153                            | 0.070919826                                       | 6.203129155                        | 436.3003195                              |
| 324.1310592                            | 0.077717414                                       | 6.136812869                        | 500.9344704                              |
| 771.0745429                            | 0.088326367                                       | 6.164838285                        | 776.4336615                              |
| 368.5145798                            | 0.074886213                                       | 6.23137327                         | 125.7684391                              |
| 98.23134328                            | 0.120405436                                       | 5.259505034                        | 25.58208955                              |
| 375.5090543                            | 0.063742617                                       | 6.113638983                        | 121.5150905                              |
| 392.2613902                            | 0.103127013                                       | 6.241661007                        | 534.8522196                              |
| 485.4461911                            | 0.076591284                                       | 6.263297594                        | 161.7569528                              |
| 1090.049725                            | 0.055850186                                       | 6.560985636                        | 957.4846899                              |
| 499.9475465                            | 0.065113762                                       | 6.190772551                        | 144.8003384                              |
| 516.8891614                            | 0.150423451                                       | 6.054433138                        | 808.2623026                              |
| 406.8202503                            | 0.066686857                                       | 6.203182739                        | 206.3265074                              |
| 433.8668491                            | 0.091584986                                       | 6.079803149                        | 410.0870953                              |
| 852.8607889                            | 0.069711439                                       | 6.41641084                         | 274.8391338                              |
| 391.2469287                            | 0.122146829                                       | 6.081877781                        | 109.3169533                              |
| 186.8740068                            | 0.155445842                                       | 5.589575803                        | 113.1679909                              |
| 314.1335536                            | 0.11607223                                        | 5.950075685                        | 324.6564417                              |
| 961.7128514                            | 0.073498815                                       | 6.609288764                        | 1066.818912                              |
| 566.0236246                            | 0.099503357                                       | 6.294971516                        | 517.5080906                              |
| 1061.012816                            | 0.177640235                                       | 5.999458125                        | 259.3939949                              |
| 97.32718894                            | 0.107817112                                       | 5.529519087                        | 39.8202765                               |
| 219.9117836                            | 0.123510195                                       | 5.922818931                        | 228.6355441                              |
| 326.9390863                            | 0.063116803                                       | 5.846589739                        | 115.6852792                              |
| 393.6205818                            | 0.099939936                                       | 6.186836522                        | 534.2086331                              |
| 287.7533632                            | 0.079058497                                       | 5.892411907                        | 100.4484305                              |
| 967.9761313                            | 0.061978116                                       | 6.40642633                         | 499.8622576                              |
| 355.7953947                            | 0.098586608                                       | 6.312986267                        | 497.2835526                              |
| 398.2577502                            | 0.094703528                                       | 6.127308827                        | 191.3631532                              |
| 113.811339                             | 0.18704104                                        | 5.760475973                        | 523.4369195                              |
| 186.7565515                            | 0.177500168                                       | 5.932266317                        | 689.9315068                              |
| 1145.755556                            | 0.103715285                                       | 6.383073666                        | 1366.571678                              |
| 487.8629032                            | 0.062025475                                       | 6.250527565                        | 283.7383513                              |
| 332.0080573                            | 0.063192831                                       | 6.146399328                        | 293.3079678                              |
| 229.1606557                            | 0.070373555                                       | 6.079449364                        | 149.8163934                              |
| 475.8316327                            | 0.090773649                                       | 6.129616716                        | 325.6213152                              |
| 733.9957836                            | 0.059819628                                       | 6.748244964                        | 601.2501757                              |
| 353.6071429                            | 0.111189846                                       | 5.820287531                        | 82.35714286                              |
| 528.1506339                            | 0.06560988                                        | 6.2142884                          | 329.6979866                              |
| 652.7732808                            | 0.055934219                                       | 6.453396723                        | 770.1002865                              |
| 76.12413793                            | 0.161189061                                       | 5.100975409                        | 23.7862069                               |
| 189.5986435                            | 0.116703443                                       | 5.893887637                        | 535.539074                               |
| 434.3918919                            | 0.082903697                                       | 6.28707057                         | 1039.676771                              |
| 165.5912596                            | 0.104618658                                       | 5.949254697                        | 132.940874                               |
| 1108.164304                            | 0.044418077                                       | 6.618225354                        | 451.0824742                              |
| 907.1420765                            | 0.083997731                                       | 5.687564391                        | 39.50273224                              |
| 116.4                                  | 0.107845805                                       | 5.358971589                        | 23.15238095                              |
| 1073.78566                             | 0.102396772                                       | 6.354704459                        | 621.8830189                              |
| 702.4291785                            | 0.047283904                                       | 6.305727258                        | 220.1728045                              |
| 754.590998                             | 0.052877785                                       | 6.404146956                        | 276.0234834                              |
| 892.6557457                            | 0.102940083                                       | 6.441330939                        | 617.7046455                              |
| 1274.150878                            | 0.109613465                                       | 6.288214583                        | 839.9252497                              |
| 147.7114625                            | 0.074255183                                       | 5.83296246                         | 65.37944664                              |
| 837.4514803                            | 0.065295782                                       | 6.347694595                        | 292.8733553                              |
| 97.03252033                            | 0.132262542                                       | 5.076684856                        | 21.30894309                              |
| 219.3746702                            | 0.111604625                                       | 5.768344136                        | 62.29287599                              |
| 315.9268897                            | 0.128247414                                       | 5.986800094                        | 102.3135068                              |

| wavelet.HHH_gldm_GrayLevelNonUniformity | wavelet.HHH_gldm_SmallDependenceEmphasis | wavelet.HHH_gldm_DependenceNonUniformityNormalized | wavelet.HHH_gldm_DependenceVariance |
|-----------------------------------------|------------------------------------------|----------------------------------------------------|-------------------------------------|
| 60.88668555                             | 0.3596927                                | 0.191880201                                        | 3.683995538                         |
| 214.0216659                             | 0.311532753                              | 0.144144468                                        | 9.288735165                         |
| 24.60829493                             | 0.545446229                              | 0.320743698                                        | 1.338890187                         |
| 210.7859583                             | 0.374994919                              | 0.204278415                                        | 4.098241955                         |
| 33.19498607                             | 0.328902758                              | 0.19826817                                         | 2.701608461                         |
| 57.55987558                             | 0.314019974                              | 0.192253458                                        | 2.744038563                         |
| 18.96439169                             | 0.487159296                              | 0.289718145                                        | 1.459253846                         |
| 62.35329341                             | 0.443633931                              | 0.26244517                                         | 1.640288286                         |
| 209.9254449                             | 0.298536236                              | 0.175911292                                        | 3.640956161                         |
| 245.5629438                             | 0.374866127                              | 0.201876843                                        | 3.17828283                          |
| 50.29625151                             | 0.426139745                              | 0.249278799                                        | 1.614024263                         |
| 84.48448043                             | 0.461335573                              | 0.238045935                                        | 3.495751993                         |
| 175.6489875                             | 0.351280626                              | 0.1893285                                          | 3.191484969                         |
| 83.86046512                             | 0.356074352                              | 0.198754484                                        | 4.311772556                         |
| 111.9813392                             | 0.257267951                              | 0.161182811                                        | 4.069454804                         |
| 1600.433424                             | 0.154045482                              | 0.084814098                                        | 12.14557949                         |
| 83.25501433                             | 0.282651762                              | 0.153229448                                        | 4.257099695                         |
| 227.3833619                             | 0.313574914                              | 0.158705857                                        | 7.218685365                         |
| 46.31271478                             | 0.382639715                              | 0.217362809                                        | 2.482540357                         |
| 301.5155302                             | 0.284552845                              | 0.148950603                                        | 8.442393387                         |
| 702.6045176                             | 0.245944921                              | 0.125108537                                        | 9.343570228                         |
| 109.4546512                             | 0.420668702                              | 0.244136019                                        | 2.05627907                          |
| 578.8674478                             | 0.152464764                              | 0.100889324                                        | 8.502030942                         |
| 29.57796258                             | 0.438843738                              | 0.247954495                                        | 1.837345101                         |
| 83.64451827                             | 0.411935922                              | 0.211293198                                        | 4.760021964                         |
| 52.12391931                             | 0.35254899                               | 0.193050353                                        | 3.48086937                          |
| 234.5100981                             | 0.391614287                              | 0.213202259                                        | 2.938178444                         |
| 90.98743894                             | 0.43405604                               | 0.231606305                                        | 2.534689984                         |
| 86.97280453                             | 0.425413936                              | 0.235501128                                        | 2.611264355                         |
| 326.0952006                             | 0.269938082                              | 0.125387742                                        | 10.95798175                         |
| 216.1972318                             | 0.409203844                              | 0.215094219                                        | 2.752138053                         |
| 796.1406408                             | 0.242378253                              | 0.130449283                                        | 7.190627472                         |
| 143.5282833                             | 0.415269287                              | 0.212397797                                        | 4.338364357                         |
| 6.961538462                             | 0.562696232                              | 0.330436391                                        | 1.18306213                          |
| 15.1746988                              | 0.549663655                              | 0.334663957                                        | 1.059188561                         |
| 210.6435644                             | 0.302834478                              | 0.157732575                                        | 4.928909911                         |
| 198.50625                               | 0.381017206                              | 0.189483748                                        | 4.391057099                         |
| 296.9719738                             | 0.338589794                              | 0.176172311                                        | 5.845141162                         |
| 51.17005988                             | 0.399240792                              | 0.241679515                                        | 1.782580946                         |
| 86.33651096                             | 0.380024656                              | 0.190924036                                        | 4.346980782                         |
| 112.2510176                             | 0.401877954                              | 0.206124613                                        | 3.428152196                         |
| 95.24344176                             | 0.308728786                              | 0.172087042                                        | 4.414673275                         |
| 158.8294762                             | 0.322797878                              | 0.172614871                                        | 3.661756481                         |
| 82.60585366                             | 0.363806113                              | 0.195617847                                        | 3.593580964                         |
| 133.1874334                             | 0.410023174                              | 0.232321789                                        | 2.174878448                         |
| 173.1543986                             | 0.389809491                              | 0.224835938                                        | 2.37516801                          |
| 376.8002813                             | 0.332033456                              | 0.182005078                                        | 3.487010431                         |
| 43.65866209                             | 0.40870326                               | 0.215726311                                        | 4.26823463                          |
| 16.13432836                             | 0.302130049                              | 0.190911116                                        | 2.985074627                         |
| 31.68008048                             | 0.394953052                              | 0.244497164                                        | 1.648531025                         |
| 353.1068925                             | 0.31852116                               | 0.15620684                                         | 6.630423167                         |
| 63.34099154                             | 0.345643515                              | 0.195594864                                        | 2.944138938                         |
| 213.4035593                             | 0.446264332                              | 0.250584844                                        | 2.040685091                         |
| 38.4822335                              | 0.41514033                               | 0.245009033                                        | 1.892161326                         |
| 981.2121723                             | 0.258440459                              | 0.123909597                                        | 7.069156559                         |
| 58.61774744                             | 0.434812147                              | 0.234728677                                        | 2.428382651                         |
| 200.8458732                             | 0.321168153                              | 0.186998219                                        | 3.129210403                         |
| 90.13689095                             | 0.405724231                              | 0.212559268                                        | 2.945789961                         |
| 99.42751843                             | 0.260868041                              | 0.134296011                                        | 9.099849682                         |
| 136.9477866                             | 0.213795142                              | 0.128454019                                        | 5.792908945                         |
| 245.9570552                             | 0.272870092                              | 0.153212101                                        | 4.945245839                         |
| 402.626506                              | 0.397291283                              | 0.194746059                                        | 5.3709335                           |
| 307.4653722                             | 0.324580107                              | 0.167478346                                        | 6.013355956                         |
| 485.1354815                             | 0.191618806                              | 0.094981324                                        | 11.9505685                          |
| 23.39631336                             | 0.277462002                              | 0.183503578                                        | 2.629064113                         |
| 191.8113329                             | 0.306735664                              | 0.147221857                                        | 5.998361396                         |
| 24.8680203                              | 0.476979695                              | 0.29361746                                         | 1.301296091                         |
| 319.5079762                             | 0.328215052                              | 0.167096851                                        | 5.21347048                          |
| 35.26008969                             | 0.402240742                              | 0.225220696                                        | 2.244907398                         |
| 124.637991                              | 0.450379785                              | 0.248564027                                        | 2.24636157                          |
| 299.7032895                             | 0.336423955                              | 0.163580116                                        | 6.986272507                         |
| 106.9202834                             | 0.326859244                              | 0.169497921                                        | 4.427215192                         |
| 966.628096                              | 0.180798126                              | 0.101284234                                        | 9.328056557                         |
| 1192.091126                             | 0.192625361                              | 0.102729528                                        | 10.36974595                         |
| 952.1063181                             | 0.310623987                              | 0.148864017                                        | 6.187551796                         |
| 69.22043011                             | 0.441972638                              | 0.254245834                                        | 1.934729127                         |
| 70.58639212                             | 0.434362156                              | 0.262585468                                        | 1.529299369                         |
| 42.92786885                             | 0.422611244                              | 0.245600645                                        | 2.030647675                         |
| 160.1247166                             | 0.333369894                              | 0.184592582                                        | 3.855442177                         |
| 170.246662                              | 0.403666873                              | 0.211261481                                        | 3.424065239                         |
| 56.03968254                             | 0.300115325                              | 0.163407029                                        | 4.44537352                          |
| 87.98284862                             | 0.446322422                              | 0.245859796                                        | 2.116541297                         |
| 156.1683381                             | 0.495550654                              | 0.275823885                                        | 1.967499754                         |
| 23.37241379                             | 0.203296189                              | 0.164042806                                        | 4.354530321                         |
| 395.7413742                             | 0.271393051                              | 0.157929541                                        | 4.067722416                         |
| 453.9806428                             | 0.331925896                              | 0.189860623                                        | 3.428647272                         |
| 81.3933162                              | 0.307279333                              | 0.170875159                                        | 4.51236114                          |
| 68.93685567                             | 0.491005653                              | 0.290645924                                        | 1.638610639                         |
| 15.3715847                              | 0.422904291                              | 0.215861925                                        | 2.594165248                         |
| 11.32380952                             | 0.391365518                              | 0.220498866                                        | 3.54521542                          |
| 407.0271698                             | 0.321219148                              | 0.156448558                                        | 7.597785151                         |
| 33.38243626                             | 0.545001088                              | 0.311859497                                        | 1.741054017                         |
| 54.04109589                             | 0.477711956                              | 0.270081686                                        | 1.871952084                         |
| 421.0249389                             | 0.333005356                              | 0.151028031                                        | 9.197817804                         |
| 636.4157768                             | 0.302267428                              | 0.144665045                                        | 7.382119581                         |
| 18.78656126                             | 0.46453754                               | 0.258416785                                        | 2.772047681                         |
| 79.39967105                             | 0.442103033                              | 0.240849799                                        | 2.922783934                         |
| 16.26829268                             | 0.343276886                              | 0.17324344                                         | 3.596800846                         |
| 42.29815303                             | 0.295180742                              | 0.16436115                                         | 3.732318767                         |
| 103.4956629                             | 0.264642622                              | 0.126782536                                        | 10.79091407                         |



| wavelet.HHH_gldm_LargeDependenceEmphasis | wavelet.HHH_gldm_LargeDependenceLowGrayLevelEmphasis | wavelet.HHH_gldm_SmallDependenceHighGrayLevelEmphasis |
|------------------------------------------|------------------------------------------------------|-------------------------------------------------------|
| 12.18130312                              | 0.029190786                                          | 176.8946922                                           |
| 24.30669234                              | 0.088652621                                          | 107.3798848                                           |
| 5.156682028                              | 0.018479655                                          | 253.0475514                                           |
| 12.23643264                              | 0.042828878                                          | 125.6809946                                           |
| 10.82172702                              | 0.233526288                                          | 29.65260831                                           |
| 11.30171073                              | 0.052283874                                          | 79.33153166                                           |
| 5.860534125                              | 0.013284193                                          | 343.0737252                                           |
| 6.736526946                              | 0.023502879                                          | 165.7287549                                           |
| 13.53968254                              | 0.037001686                                          | 117.1497865                                           |
| 10.89154293                              | 0.029612909                                          | 168.6298514                                           |
| 7.009673519                              | 0.014110455                                          | 326.6354482                                           |
| 10.00134953                              | 0.011362153                                          | 481.5407991                                           |
| 11.59980714                              | 0.013183302                                          | 337.894331                                            |
| 12.98211091                              | 0.016434579                                          | 320.5167033                                           |
| 15.9571899                               | 0.158887007                                          | 30.959739                                             |
| 46.44062185                              | 0.223148605                                          | 34.3533803                                            |
| 16.23782235                              | 0.080250291                                          | 62.2912215                                            |
| 19.72212693                              | 0.04495466                                           | 156.431921                                            |
| 9.357388316                              | 0.034255347                                          | 122.3306637                                           |
| 22.80435559                              | 0.078036275                                          | 96.86369222                                           |
| 27.50382848                              | 0.133938853                                          | 55.68654194                                           |
| 7.81627907                               | 0.015767917                                          | 251.7828376                                           |
| 35.01830831                              | 0.871081685                                          | 7.488414189                                           |
| 7.307692308                              | 0.023352926                                          | 188.9257907                                           |
| 12.68770764                              | 0.037139851                                          | 168.7438954                                           |
| 11.91930836                              | 0.066935342                                          | 93.32163602                                           |
| 10.06982112                              | 0.007333631                                          | 600.6212273                                           |
| 8.7585485                                | 0.019500922                                          | 266.4883392                                           |
| 8.789235127                              | 0.010602539                                          | 504.6040697                                           |
| 29.86782061                              | 0.065434985                                          | 130.6567472                                           |
| 9.642969487                              | 0.011947938                                          | 371.9823904                                           |
| 23.47790894                              | 0.077861128                                          | 77.83596794                                           |
| 12.11952779                              | 0.004686681                                          | 1262.69608                                            |
| 4.807692308                              | 0.029309659                                          | 172.3515734                                           |
| 4.614457831                              | 0.028790802                                          | 290.0403439                                           |
| 16.48217822                              | 0.056266726                                          | 99.90177563                                           |
| 13.17569444                              | 0.014174292                                          | 399.5677791                                           |
| 16.39117472                              | 0.017107048                                          | 347.4212119                                           |
| 7.605988024                              | 0.028462682                                          | 166.2818505                                           |
| 13.085796                                | 0.028919507                                          | 204.9215958                                           |
| 11.01492537                              | 0.018789887                                          | 273.9307042                                           |
| 14.73137461                              | 0.058101469                                          | 87.65159194                                           |
| 13.39220463                              | 0.033354909                                          | 143.4803624                                           |
| 11.80390244                              | 0.033970925                                          | 152.2499753                                           |
| 8.305644302                              | 0.021695715                                          | 185.0178568                                           |
| 8.911131059                              | 0.032737967                                          | 131.8611302                                           |
| 12.54617909                              | 0.017272028                                          | 263.8999096                                           |
| 11.88507719                              | 0.038667144                                          | 157.0561027                                           |
| 11.98507463                              | 0.144392625                                          | 25.8875432                                            |
| 7.410462777                              | 0.029735178                                          | 156.6311553                                           |
| 19.0239486                               | 0.051535599                                          | 128.0031705                                           |
| 11.05320435                              | 0.0270133                                            | 173.4434123                                           |
| 7.508767338                              | 0.007968819                                          | 496.6071432                                           |
| 7.592216582                              | 0.019670317                                          | 208.7013795                                           |
| 24.05902192                              | 0.048492573                                          | 139.0724408                                           |
| 8.494880546                              | 0.027001429                                          | 192.1080765                                           |
| 11.96580027                              | 0.029813477                                          | 139.813271                                            |
| 10.01160093                              | 0.014295393                                          | 366.1388434                                           |
| 25.71498771                              | 0.07024294                                           | 106.2998764                                           |
| 22.5368899                               | 0.127963251                                          | 42.19794674                                           |
| 17.32940066                              | 0.058455669                                          | 89.38361837                                           |
| 14.38408178                              | 0.016188987                                          | 387.8271586                                           |
| 17.15469256                              | 0.031977712                                          | 186.4267878                                           |
| 39.67960454                              | 0.037996279                                          | 205.9737731                                           |
| 12.13364055                              | 0.198251513                                          | 31.87645807                                           |
| 18.9871217                               | 0.094840215                                          | 72.66489283                                           |
| 5.675126904                              | 0.023482434                                          | 155.9918902                                           |
| 16.04347826                              | 0.044196656                                          | 131.6552344                                           |
| 8.618834081                              | 0.03652673                                           | 119.3007246                                           |
| 7.851317752                              | 0.009198954                                          | 440.4852824                                           |
| 18.93421053                              | 0.057192247                                          | 123.5026442                                           |
| 14.7023915                               | 0.041662966                                          | 135.2852773                                           |
| 34.10410217                              | 0.317635396                                          | 21.6753938                                            |
| 34.7659321                               | 0.193962127                                          | 37.15833332                                           |
| 19.016122                                | 0.017296461                                          | 363.1662736                                           |
| 7.32078853                               | 0.018994206                                          | 220.5329437                                           |
| 6.631154879                              | 0.026558035                                          | 148.8964237                                           |
| 7.727868852                              | 0.047127552                                          | 102.9089397                                           |
| 12.99886621                              | 0.033295819                                          | 162.7280556                                           |
| 10.78215039                              | 0.017251113                                          | 300.401429                                            |
| 15.42460317                              | 0.047625051                                          | 111.6878197                                           |
| 7.729306488                              | 0.017085998                                          | 243.9324508                                           |
| 6.819484241                              | 0.0131631                                            | 332.8774392                                           |
| 18.17241379                              | 0.32610789                                           | 16.43126408                                           |
| 15.66705986                              | 0.090099154                                          | 53.16513142                                           |
| 12.14170928                              | 0.030468692                                          | 148.7864908                                           |
| 15.05398458                              | 0.10490297                                           | 53.78628991                                           |
| 6.115979381                              | 0.007088878                                          | 556.0982917                                           |
| 9.50273224                               | 0.016678381                                          | 402.0922974                                           |
| 10.80952381                              | 0.119220957                                          | 41.45612854                                           |
| 20.46918239                              | 0.019708452                                          | 351.7495606                                           |
| 5.878186969                              | 0.014037468                                          | 392.7119285                                           |
| 6.81409002                               | 0.011482368                                          | 371.3492443                                           |
| 23.48215159                              | 0.027686351                                          | 303.4651042                                           |
| 21.33310369                              | 0.017223461                                          | 392.5877624                                           |
| 8.415019763                              | 0.080770497                                          | 67.13717792                                           |
| 8.976973684                              | 0.012357069                                          | 376.5887708                                           |
| 13.29268293                              | 0.162160041                                          | 37.11455192                                           |
| 14.41952507                              | 0.07561125                                           | 67.01854431                                           |
| 29.09913259                              | 0.098883823                                          | 88.38984288                                           |

| wavelet.HHH_gldm_LargeDependenceHighGrayLevelEmphasis | wavelet.HHH_gldm_SmallDependenceLowGrayLevelEmphasis | wavelet.HHH_gldm_LowGrayLevelEmphasis | wavelet.HHH_gldm_DistanceZoneVariabilityNormalized |
|-------------------------------------------------------|------------------------------------------------------|---------------------------------------|----------------------------------------------------|
| 5690.531161                                           | 0.00298395                                           | 0.004433849                           | 0.944102272                                        |
| 7478.652383                                           | 0.002696064                                          | 0.00620679                            | 0.943291666                                        |
| 2233.582949                                           | 0.004366893                                          | 0.005832295                           | 0.907362987                                        |
| 3810.175332                                           | 0.002384424                                          | 0.004648283                           | 0.885465624                                        |
| 854.0362117                                           | 0.018427781                                          | 0.036433133                           | 0.930645412                                        |
| 2818.371695                                           | 0.004114442                                          | 0.007389796                           | 0.9232                                             |
| 3808.139466                                           | 0.004015471                                          | 0.004944245                           | 0.803379501                                        |
| 2394.203593                                           | 0.003229533                                          | 0.005110324                           | 0.863559882                                        |
| 5245.023569                                           | 0.001611704                                          | 0.003537337                           | 0.96177923                                         |
| 4663.078438                                           | 0.001463614                                          | 0.003521279                           | 0.945414852                                        |
| 5015.1052                                             | 0.002079677                                          | 0.003396304                           | 0.908644526                                        |
| 10187.87787                                           | 0.001664658                                          | 0.002228883                           | 0.89258015                                         |
| 10869.93491                                           | 0.00095926                                           | 0.001676322                           | 0.946706699                                        |
| 11403.76744                                           | 0.001679185                                          | 0.002453317                           | 0.95240928                                         |
| 1768.485181                                           | 0.005432605                                          | 0.013008067                           | 0.842097241                                        |
| 9788.798906                                           | 0.001171487                                          | 0.005319006                           | 0.951657623                                        |
| 3499.166189                                           | 0.003296458                                          | 0.006850116                           | 0.789708176                                        |
| 9161.783877                                           | 0.001605304                                          | 0.003291188                           | 0.959637098                                        |
| 2932.005155                                           | 0.003494571                                          | 0.005674945                           | 0.860065713                                        |
| 6935.74759                                            | 0.001744767                                          | 0.004291865                           | 0.945870804                                        |
| 5813.021631                                           | 0.001801526                                          | 0.005604404                           | 0.91641262                                         |
| 4379.031395                                           | 0.001635946                                          | 0.00276454                            | 0.849568878                                        |
| 1517.406078                                           | 0.00749452                                           | 0.030887599                           | 0.935555556                                        |
| 2899.097713                                           | 0.004134303                                          | 0.005782363                           | 0.789051294                                        |
| 4912.348007                                           | 0.00327385                                           | 0.005019893                           | 0.886512561                                        |
| 3043.54755                                            | 0.0055117                                            | 0.009824891                           | 0.957617068                                        |
| 14996.47144                                           | 0.000666344                                          | 0.001096994                           | 0.905                                              |
| 4813.559665                                           | 0.002003079                                          | 0.003305115                           | 0.952608163                                        |
| 9480.370538                                           | 0.00122435                                           | 0.001917338                           | 0.963772252                                        |
| 13923.78875                                           | 0.001110701                                          | 0.002758869                           | 0.948021483                                        |
| 8500.232463                                           | 0.0009506                                            | 0.001679727                           | 0.957842703                                        |
| 7264.805396                                           | 0.001169073                                          | 0.003766118                           | 0.961021707                                        |
| 35997.14757                                           | 0.00064825                                           | 0.000862301                           | 0.939579142                                        |
| 1581.692308                                           | 0.015879616                                          | 0.017296871                           | 0.857988166                                        |
| 2273.653614                                           | 0.00625767                                           | 0.009250172                           | 0.821511214                                        |
| 5078.206931                                           | 0.00190468                                           | 0.004328877                           | 0.908259544                                        |
| 13210.24896                                           | 0.000894428                                          | 0.00155174                            | 0.958285407                                        |
| 16297.82379                                           | 0.000695116                                          | 0.001389384                           | 0.925643295                                        |
| 2799.916168                                           | 0.003356347                                          | 0.005646398                           | 0.853318442                                        |
| 6725.21163                                            | 0.0031706                                            | 0.004486762                           | 0.97722398                                         |
| 7246.29308                                            | 0.002125705                                          | 0.003104583                           | 0.866598397                                        |
| 4090.545645                                           | 0.004014758                                          | 0.006713725                           | 0.932597632                                        |
| 5669.39525                                            | 0.001630712                                          | 0.003311309                           | 0.928426658                                        |
| 4526.167805                                           | 0.00252207                                           | 0.004295767                           | 0.869073597                                        |
| 3593.799255                                           | 0.002210291                                          | 0.003729269                           | 0.886009784                                        |
| 2755.699282                                           | 0.00278946                                           | 0.004998233                           | 0.963722072                                        |
| 9483.009845                                           | 0.00074672                                           | 0.001668057                           | 0.877320075                                        |
| 4143.753002                                           | 0.004038573                                          | 0.005909407                           | 0.949309711                                        |
| 1210.455224                                           | 0.015991391                                          | 0.024748141                           | 0.844273427                                        |
| 2648.04829                                            | 0.007817784                                          | 0.009769867                           | 0.849620987                                        |
| 7276.79118                                            | 0.001463269                                          | 0.003344159                           | 0.958933438                                        |
| 5211.286578                                           | 0.00282569                                           | 0.004368876                           | 0.957595683                                        |
| 7993.428945                                           | 0.000871943                                          | 0.001451236                           | 0.930126924                                        |
| 3708.854484                                           | 0.003421501                                          | 0.004817127                           | 0.918790346                                        |
| 12189.91139                                           | 0.000859402                                          | 0.002390509                           | 0.956807778                                        |
| 3285.473265                                           | 0.003049712                                          | 0.004982395                           | 0.855204082                                        |
| 5101.700866                                           | 0.001479403                                          | 0.003170955                           | 0.785169813                                        |
| 8131.914153                                           | 0.001614177                                          | 0.002470438                           | 0.799470699                                        |
| 9749.821867                                           | 0.002110775                                          | 0.004121806                           | 0.932286857                                        |
| 4107.775255                                           | 0.002495276                                          | 0.007001922                           | 1                                                  |
| 5367.047192                                           | 0.001780563                                          | 0.004279216                           | 0.950608336                                        |
| 13405.3996                                            | 0.000856394                                          | 0.001525904                           | 0.930240019                                        |
| 9545.513592                                           | 0.001121636                                          | 0.002387722                           | 0.978949751                                        |
| 41980.16624                                           | 0.000558478                                          | 0.001331259                           | 0.949033103                                        |
| 1101.723502                                           | 0.007919929                                          | 0.024968451                           | 0.939453125                                        |
| 3998.994849                                           | 0.003451929                                          | 0.006983713                           | 0.923052518                                        |
| 1871.461929                                           | 0.005566924                                          | 0.007461127                           | 0.824459877                                        |
| 6169.62371                                            | 0.001909635                                          | 0.003818401                           | 0.963836565                                        |
| 2399.282511                                           | 0.004604024                                          | 0.007009445                           | 0.941516628                                        |
| 7463.302834                                           | 0.001103802                                          | 0.001715913                           | 0.905700692                                        |
| 6542.446711                                           | 0.001875033                                          | 0.003934018                           | 0.912179554                                        |
| 5640.117803                                           | 0.002893426                                          | 0.004744148                           | 0.965527855                                        |
| 3778.446401                                           | 0.002828837                                          | 0.010744796                           | 0.957056154                                        |
| 6365.3986                                             | 0.001596016                                          | 0.006237484                           | 0.950876062                                        |
| 21344.04118                                           | 0.000463974                                          | 0.001089181                           | 0.955194876                                        |
| 3511.300179                                           | 0.003555312                                          | 0.004862906                           | 0.871896084                                        |
| 2141.682184                                           | 0.004062089                                          | 0.006230823                           | 0.862602854                                        |
| 1723.167213                                           | 0.007651462                                          | 0.011112797                           | 0.935347479                                        |
| 6104.327098                                           | 0.001198995                                          | 0.003567425                           | 0.871490271                                        |
| 7739.765987                                           | 0.001268718                                          | 0.002263562                           | 0.901950208                                        |
| 5377.051587                                           | 0.003014774                                          | 0.005155592                           | 0.939817137                                        |
| 3970.351976                                           | 0.001976701                                          | 0.003171405                           | 0.858180477                                        |
| 4228.84563                                            | 0.002020888                                          | 0.002949159                           | 0.933910172                                        |
| 1317.793103                                           | 0.007171613                                          | 0.029506629                           | 0.875555556                                        |
| 2895.431731                                           | 0.002503698                                          | 0.006802991                           | 0.97734592                                         |
| 5143.11176                                            | 0.001260931                                          | 0.002972783                           | 0.852832974                                        |
| 2380.722365                                           | 0.005450649                                          | 0.010349113                           | 0.945778638                                        |
| 6672.177191                                           | 0.001456755                                          | 0.001992317                           | 0.860668043                                        |
| 8287.699454                                           | 0.006077257                                          | 0.006751509                           | 0.908259544                                        |
| 1223.733333                                           | 0.020141748                                          | 0.02591935                            | 0.96001666                                         |
| 21783.84101                                           | 0.000602701                                          | 0.001260544                           | 0.931745233                                        |
| 3993.335694                                           | 0.004354989                                          | 0.005344378                           | 0.941097476                                        |
| 4858.984344                                           | 0.001890738                                          | 0.002690094                           | 0.915420158                                        |
| 20479.22005                                           | 0.000779261                                          | 0.0015853                             | 0.940161254                                        |
| 26924.20909                                           | 0.000450278                                          | 0.001014894                           | 0.953538722                                        |
| 1206.375494                                           | 0.012039165                                          | 0.017535271                           | 0.849298285                                        |
| 7394.657072                                           | 0.001546709                                          | 0.002285056                           | 0.974156289                                        |
| 1266.512195                                           | 0.013817288                                          | 0.022390308                           | 0.78125                                            |
| 3054.931398                                           | 0.006130421                                          | 0.009659571                           | 0.837372449                                        |
| 8821.193309                                           | 0.002396956                                          | 0.00488562                            | 0.93971358                                         |

| wavelet.HHH_gldzm_LowIntensityEmphasis | wavelet.HHH_gldzm_LargeDistanceEmphasis | wavelet.HHH_gldzm_HighIntensitySmallDistanceEmphasis | wavelet.HHH_gldzm_LowIntensityLargeDistanceEmphasis |
|----------------------------------------|-----------------------------------------|------------------------------------------------------|-----------------------------------------------------|
| 0.007785523                            | 1.086330935                             | 480.4658273                                          | 0.007940127                                         |
| 0.009117992                            | 1.087621697                             | 333.5782337                                          | 0.009512563                                         |
| 0.007498334                            | 1.146067416                             | 451.8876404                                          | 0.02024377                                          |
| 0.006122181                            | 1.182959641                             | 317.1820628                                          | 0.0072825                                           |
| 0.053436396                            | 1.107913669                             | 89.02697842                                          | 0.067616862                                         |
| 0.012505413                            | 1.12                                    | 248.2355556                                          | 0.013795247                                         |
| 0.007389597                            | 1.331578947                             | 622.4394737                                          | 0.008037116                                         |
| 0.006797248                            | 1.220930233                             | 352.6177326                                          | 0.007952164                                         |
| 0.00526281                             | 1.058470765                             | 389.8609445                                          | 0.005540339                                         |
| 0.004201345                            | 1.08424337                              | 440.7318643                                          | 0.004870794                                         |
| 0.004832364                            | 1.143939394                             | 738.9135101                                          | 0.005089762                                         |
| 0.003380276                            | 1.170860927                             | 998.9443709                                          | 0.004932713                                         |
| 0.002589531                            | 1.082191781                             | 938.9984433                                          | 0.003090632                                         |
| 0.004321422                            | 1.073170732                             | 885.02051                                            | 0.00444777                                          |
| 0.021002829                            | 1.259259259                             | 114.2911523                                          | 0.037662322                                         |
| 0.007795877                            | 1.07435653                              | 220.9723546                                          | 0.008218127                                         |
| 0.011630137                            | 1.358208955                             | 200.4664179                                          | 0.014346038                                         |
| 0.004941314                            | 1.061818182                             | 486.1669697                                          | 0.005129492                                         |
| 0.008506476                            | 1.227091633                             | 306.1055777                                          | 0.009461104                                         |
| 0.005940659                            | 1.083518931                             | 332.0977171                                          | 0.006372322                                         |
| 0.007336867                            | 1.131111111                             | 218.5816667                                          | 0.008247604                                         |
| 0.003657051                            | 1.245783133                             | 557.6442771                                          | 0.004598678                                         |
| 0.054365122                            | 1.1                                     | 48.21217949                                          | 0.0591511                                           |
| 0.008632131                            | 1.359504132                             | 387.8667355                                          | 0.010575397                                         |
| 0.007403885                            | 1.181172291                             | 391.6203375                                          | 0.008198763                                         |
| 0.015278261                            | 1.064981949                             | 259.2129964                                          | 0.015702318                                         |
| 0.001592229                            | 1.15                                    | 1473.295942                                          | 0.001708494                                         |
| 0.00443516                             | 1.072857143                             | 612.2360714                                          | 0.004744078                                         |
| 0.002682442                            | 1.055363322                             | 1165.670127                                          | 0.002743215                                         |
| 0.003982607                            | 1.080106809                             | 477.9509346                                          | 0.004252808                                         |
| 0.002238726                            | 1.064628214                             | 896.1356845                                          | 0.002349332                                         |
| 0.004804717                            | 1.059653624                             | 316.5493906                                          | 0.00504897                                          |
| 0.001460105                            | 1.093548387                             | 2964.479301                                          | 0.001492809                                         |
| 0.025750833                            | 1.230769231                             | 294.6692308                                          | 0.028058466                                         |
| 0.010665948                            | 1.297169811                             | 490.120283                                           | 0.011920466                                         |
| 0.006137978                            | 1.144578313                             | 317.345256                                           | 0.006838158                                         |
| 0.002227755                            | 1.063934426                             | 1033.183607                                          | 0.002315208                                         |
| 0.00196465                             | 1.116022099                             | 994.6584451                                          | 0.002109793                                         |
| 0.007919587                            | 1.23907455                              | 382.7583548                                          | 0.009036239                                         |
| 0.00787025                             | 1.034562212                             | 535.5270737                                          | 0.007978464                                         |
| 0.00497473                             | 1.21559633                              | 642.2316514                                          | 0.010007568                                         |
| 0.012479855                            | 1.104761905                             | 276.3539683                                          | 0.012978023                                         |
| 0.004921817                            | 1.111504425                             | 431.7300885                                          | 0.005245515                                         |
| 0.006435375                            | 1.211267606                             | 396.8210094                                          | 0.007720215                                         |
| 0.005147606                            | 1.182030338                             | 427.9072345                                          | 0.006803616                                         |
| 0.006828072                            | 1.055441478                             | 332.3349589                                          | 0.007152822                                         |
| 0.002212926                            | 1.196949602                             | 755.8259284                                          | 0.002521782                                         |
| 0.009189718                            | 1.078066914                             | 373.6115242                                          | 0.009532139                                         |
| 0.048366452                            | 1.255319149                             | 88.10106383                                          | 0.062338083                                         |
| 0.017276667                            | 1.245689655                             | 365.6896552                                          | 0.018462552                                         |
| 0.004482452                            | 1.062919463                             | 394.1935822                                          | 0.00467524                                          |
| 0.007558435                            | 1.06501548                              | 499.6315789                                          | 0.007961075                                         |
| 0.00186054                             | 1.108751942                             | 1081.077421                                          | 0.00199151                                          |
| 0.007516305                            | 1.127208481                             | 487.3215548                                          | 0.007817916                                         |
| 0.003316554                            | 1.066251416                             | 528.5178369                                          | 0.003483968                                         |
| 0.006886126                            | 1.235714286                             | 408.1154762                                          | 0.007688324                                         |
| 0.004469339                            | 1.3671875                               | 399.1044922                                          | 0.005985198                                         |
| 0.003822803                            | 1.339130435                             | 809.1882609                                          | 0.00434791                                          |
| 0.007768704                            | 1.105263158                             | 397.004386                                           | 0.008180391                                         |
| 0.012006513                            | 1                                       | 199.9060773                                          | 0.012006513                                         |
| 0.006512729                            | 1.076013514                             | 321.7723818                                          | 0.006835361                                         |
| 0.002065961                            | 1.108569052                             | 953.4287646                                          | 0.00357425                                          |
| 0.003290452                            | 1.031914894                             | 573.5675975                                          | 0.003374078                                         |
| 0.002877063                            | 1.078504673                             | 1054.101402                                          | 0.002957964                                         |
| 0.03585622                             | 1.09375                                 | 106.703125                                           | 0.036184002                                         |
| 0.011090871                            | 1.120240481                             | 229.7194389                                          | 0.01261528                                          |
| 0.01067301                             | 1.291666667                             | 297.3078704                                          | 0.011913856                                         |
| 0.005672211                            | 1.055263158                             | 396.0649123                                          | 0.005836502                                         |
| 0.0107999                              | 1.090452261                             | 286.6469849                                          | 0.011103391                                         |
| 0.002298006                            | 1.148832685                             | 946.2035506                                          | 0.002594009                                         |
| 0.005432688                            | 1.138086643                             | 354.1137184                                          | 0.006001872                                         |
| 0.008420118                            | 1.052631579                             | 412.8345865                                          | 0.008667191                                         |
| 0.016258419                            | 1.06586169                              | 118.669045                                           | 0.017436768                                         |
| 0.008498412                            | 1.075590551                             | 191.6862205                                          | 0.009750007                                         |
| 0.001460161                            | 1.068784802                             | 1153.398706                                          | 0.001591748                                         |
| 0.007324295                            | 1.206349206                             | 472.3359788                                          | 0.01977349                                          |
| 0.008641381                            | 1.222614841                             | 326.2517668                                          | 0.020798415                                         |
| 0.016602554                            | 1.100334448                             | 233.7107023                                          | 0.018006595                                         |
| 0.004285567                            | 1.207055215                             | 462.8830521                                          | 0.004995911                                         |
| 0.00302008                             | 1.155092593                             | 714.8508873                                          | 0.003328014                                         |
| 0.009676342                            | 1.093167702                             | 360.0465839                                          | 0.009944204                                         |
| 0.004187395                            | 1.23042836                              | 512.2234121                                          | 0.009394315                                         |
| 0.003863581                            | 1.102646869                             | 652.9720788                                          | 0.004128926                                         |
| 0.051212857                            | 1.2                                     | 74.175                                               | 0.052499018                                         |
| 0.009182962                            | 1.034375                                | 197.1606771                                          | 0.009598876                                         |
| 0.003701983                            | 1.239941119                             | 422.0154563                                          | 0.004644989                                         |
| 0.017503117                            | 1.083665339                             | 171.3635458                                          | 0.018135767                                         |
| 0.002729342                            | 1.226027397                             | 1060.279395                                          | 0.002993691                                         |
| 0.013483498                            | 1.144578313                             | 912.1536145                                          | 0.013655367                                         |
| 0.04477288                             | 1.06122449                              | 109.3112245                                          | 0.04722186                                          |
| 0.001815787                            | 1.106137184                             | 1061.52491                                           | 0.001932424                                         |
| 0.007496208                            | 1.091121495                             | 700.9906542                                          | 0.007709241                                         |
| 0.00362615                             | 1.132743363                             | 753.4256637                                          | 0.003911684                                         |
| 0.002269451                            | 1.09261745                              | 890.2261745                                          | 0.002413866                                         |
| 0.00144704                             | 1.071390799                             | 1274.197779                                          | 0.001516295                                         |
| 0.02455083                             | 1.246268657                             | 136.7052239                                          | 0.033060041                                         |
| 0.003256358                            | 1.039279869                             | 840.695581                                           | 0.003310508                                         |
| 0.037479099                            | 1.375                                   | 96.9375                                              | 0.04889547                                          |
| 0.020796593                            | 1.267857143                             | 217.4821429                                          | 0.02311                                             |
| 0.008813181                            | 1.093333333                             | 325.2177778                                          | 0.009321248                                         |

| wavelet.HHH_gldzm_HighIntensityEmphasis | wavelet.HHH_gldzm_DistanceZoneVariability | wavelet.HHH_gldzm_ZonePercentage | wavelet.HHH_gldzm_IntensityVariabilityNormalized |
|-----------------------------------------|-------------------------------------------|----------------------------------|--------------------------------------------------|
| 494.0251799                             | 262.4604317                               | 0.393767705                      | 0.056984628                                      |
| 341.4714882                             | 678.2267038                               | 0.346172364                      | 0.05237339                                       |
| 459.3258427                             | 242.2659176                               | 0.615207373                      | 0.045013957                                      |
| 335.3165919                             | 987.2941704                               | 0.423149905                      | 0.052850449                                      |
| 90.16546763                             | 129.3597122                               | 0.387186663                      | 0.071994203                                      |
| 254.9155556                             | 207.72                                    | 0.349922224                      | 0.059002469                                      |
| 693.3421053                             | 152.6421053                               | 0.56379822                       | 0.047534626                                      |
| 372.8081395                             | 445.5968992                               | 0.51497006                       | 0.047698456                                      |
| 394.035982                              | 641.5067466                               | 0.320827321                      | 0.064508226                                      |
| 449.6318253                             | 1212.021841                               | 0.413815365                      | 0.051583062                                      |
| 764.5782828                             | 359.8232323                               | 0.478839178                      | 0.046500357                                      |
| 1045.911258                             | 673.8980132                               | 0.509446694                      | 0.034898469                                      |
| 959.4408468                             | 760.2054795                               | 0.387174542                      | 0.055701766                                      |
| 899.8957871                             | 429.5365854                               | 0.403398927                      | 0.048460922                                      |
| 123.090535                              | 204.6296296                               | 0.266739846                      | 0.08191502                                       |
| 225.3937083                             | 998.2888465                               | 0.151000432                      | 0.087312716                                      |
| 220.8656716                             | 158.7313433                               | 0.287965616                      | 0.079923764                                      |
| 494.7187879                             | 791.7006061                               | 0.353773585                      | 0.054280992                                      |
| 325.6175299                             | 215.876494                                | 0.431271478                      | 0.056872113                                      |
| 339.9175947                             | 849.3919822                               | 0.320599786                      | 0.056219959                                      |
| 226.26                                  | 1237.157037                               | 0.258422665                      | 0.072628807                                      |
| 595.5771084                             | 705.1421687                               | 0.48255814                       | 0.046279576                                      |
| 50.15641026                             | 364.8666667                               | 0.142804833                      | 0.127744905                                      |
| 425.5247934                             | 190.9504132                               | 0.503118503                      | 0.048186599                                      |
| 411.3641208                             | 499.1065719                               | 0.467607973                      | 0.046316832                                      |
| 263.4151625                             | 265.2599278                               | 0.399135447                      | 0.054829334                                      |
| 1530.558442                             | 1393.7                                    | 0.444316215                      | 0.044476303                                      |
| 619.75                                  | 666.8257143                               | 0.488485694                      | 0.041934694                                      |
| 1188.777393                             | 835.5905421                               | 0.49121813                       | 0.032937824                                      |
| 486.64753                               | 710.0680908                               | 0.294649882                      | 0.060108627                                      |
| 911.2404448                             | 1378.33565                                | 0.452658069                      | 0.042775922                                      |
| 322.0942912                             | 1498.232842                               | 0.262900506                      | 0.069022963                                      |
| 3036.201075                             | 873.8086022                               | 0.457452041                      | 0.042215285                                      |
| 309.3230769                             | 55.76923077                               | 0.625                            | 0.051360947                                      |
| 532.3962264                             | 174.1603774                               | 0.638554217                      | 0.038358847                                      |
| 329.8253012                             | 603.0843373                               | 0.328712871                      | 0.063724779                                      |
| 1048.387705                             | 1169.108197                               | 0.423611111                      | 0.040560333                                      |
| 1025.641673                             | 1172.790055                               | 0.377757901                      | 0.050691807                                      |
| 413.3753213                             | 331.940874                                | 0.465868263                      | 0.046107282                                      |
| 539.1820276                             | 424.1152074                               | 0.413727359                      | 0.051615027                                      |
| 677.2293578                             | 566.7553517                               | 0.443690638                      | 0.049724584                                      |
| 284.7111111                             | 293.768254                                | 0.330535152                      | 0.063179642                                      |
| 445.4053097                             | 524.5610619                               | 0.34409257                       | 0.0604182                                        |
| 419.1502347                             | 370.2253521                               | 0.415609756                      | 0.054200004                                      |
| 450.7012835                             | 759.3103851                               | 0.456336528                      | 0.049660358                                      |
| 337.5533881                             | 938.6652977                               | 0.437163375                      | 0.056267893                                      |
| 794.5324934                             | 1322.998674                               | 0.353492733                      | 0.055532298                                      |
| 381.1672862                             | 255.3643123                               | 0.461406518                      | 0.047249209                                      |
| 89.61702128                             | 39.68085106                               | 0.350746269                      | 0.081032141                                      |
| 394.6551724                             | 197.112069                                | 0.466800805                      | 0.047488109                                      |
| 401.5494966                             | 1143.048658                               | 0.348130841                      | 0.05731583                                       |
| 504.1919505                             | 309.3034056                               | 0.390568319                      | 0.049161786                                      |
| 1112.549456                             | 1796.075091                               | 0.505365088                      | 0.040933436                                      |
| 505.3109541                             | 260.0176678                               | 0.478849408                      | 0.046036285                                      |
| 538.8844847                             | 1689.722537                               | 0.270734325                      | 0.058652873                                      |
| 434.5333333                             | 359.1857143                               | 0.4778157                        | 0.048956916                                      |
| 438.7578125                             | 603.0104167                               | 0.350205198                      | 0.058810764                                      |
| 893.8156522                             | 459.6956522                               | 0.444702243                      | 0.042601134                                      |
| 406.8991228                             | 212.5614035                               | 0.28009828                       | 0.065674054                                      |
| 199.9060773                             | 181                                       | 0.205448354                      | 0.1075364                                        |
| 328.0371622                             | 562.7601351                               | 0.279377065                      | 0.075488495                                      |
| 977.4072379                             | 2236.297005                               | 0.438846294                      | 0.044274864                                      |
| 577.2225177                             | 1104.255319                               | 0.365048544                      | 0.055542981                                      |
| 1076.02243                              | 507.7327103                               | 0.195898938                      | 0.072918159                                      |
| 113.5                                   | 60.125                                    | 0.294930876                      | 0.078613281                                      |
| 237.006012                              | 460.6032064                               | 0.321313587                      | 0.066317003                                      |
| 327.0231481                             | 178.0833333                               | 0.54822335                       | 0.050197188                                      |
| 401.7885965                             | 1098.773684                               | 0.356584298                      | 0.056588181                                      |
| 295.3266332                             | 187.361809                                | 0.446188341                      | 0.059569203                                      |
| 979.2743191                             | 931.0603113                               | 0.511188463                      | 0.044446169                                      |
| 367.6841155                             | 1010.694946                               | 0.364473684                      | 0.055397894                                      |
| 416.1203008                             | 385.245614                                | 0.353410097                      | 0.057744612                                      |
| 120.5444566                             | 871.8781559                               | 0.17627709                       | 0.097829793                                      |
| 194.888189                              | 1207.612598                               | 0.189100655                      | 0.078349557                                      |
| 1172.720603                             | 2916.209957                               | 0.332570806                      | 0.052753253                                      |
| 497.8624339                             | 494.3650794                               | 0.508064516                      | 0.045323479                                      |
| 341.6890459                             | 488.2332155                               | 0.506714414                      | 0.049307645                                      |
| 239.083612                              | 279.6688963                               | 0.490163934                      | 0.054417736                                      |
| 484.3328221                             | 568.2116564                               | 0.369614512                      | 0.057755279                                      |
| 745.0516975                             | 1168.927469                               | 0.455375966                      | 0.037743151                                      |
| 369.7639752                             | 151.310559                                | 0.319444444                      | 0.073569693                                      |
| 544.3249631                             | 580.9881832                               | 0.504847129                      | 0.048212092                                      |
| 671.7211104                             | 1446.626856                               | 0.554799427                      | 0.041734166                                      |
| 82                                      | 26.26666667                               | 0.206896552                      | 0.115555556                                      |
| 198.5427083                             | 938.2520833                               | 0.28310233                       | 0.075540365                                      |
| 449.2414132                             | 1738.073602                               | 0.372169467                      | 0.053940778                                      |
| 174.9282869                             | 237.3904382                               | 0.322622108                      | 0.071125855                                      |
| 1128.073059                             | 753.9452055                               | 0.56443299                       | 0.033360439                                      |
| 944.6746988                             | 75.38554217                               | 0.453551913                      | 0.052402381                                      |
| 109.6938776                             | 47.04081633                               | 0.466666667                      | 0.077051229                                      |
| 1092.293863                             | 1290.467148                               | 0.348427673                      | 0.054181861                                      |
| 714.6939252                             | 402.7897196                               | 0.606232295                      | 0.036127609                                      |
| 778.5221239                             | 517.2123894                               | 0.552837573                      | 0.041603884                                      |
| 913.0724832                             | 1400.840268                               | 0.364303178                      | 0.048495113                                      |
| 1297.285563                             | 1803.141724                               | 0.325697554                      | 0.054909825                                      |
| 144.9104478                             | 113.8059701                               | 0.529644269                      | 0.062708844                                      |
| 848.2324059                             | 595.2094926                               | 0.502467105                      | 0.046284565                                      |
| 105.375                                 | 37.5                                      | 0.390243902                      | 0.088541667                                      |
| 229.4821429                             | 93.78571429                               | 0.295514512                      | 0.066804847                                      |
| 332.8177778                             | 211.4355556                               | 0.278810409                      | 0.065560494                                      |

| wavelet.HHH_gldzm_LowIntensitySmallDistanceEmphasis | wavelet.HHH_gldzm_IntensityVariability | wavelet.HHH_gldzm_HighIntensityLargeDistanceEmphasis | wavelet.HHH_gldzm_SmallDistanceEmphasis |
|-----------------------------------------------------|----------------------------------------|------------------------------------------------------|-----------------------------------------|
| 0.007746872                                         | 15.84172662                            | 548.2625899                                          | 0.978417266                             |
| 0.009019349                                         | 37.65646732                            | 373.0445063                                          | 0.978094576                             |
| 0.004311975                                         | 12.01872659                            | 489.0786517                                          | 0.963483146                             |
| 0.005832101                                         | 58.92825112                            | 407.8547085                                          | 0.95426009                              |
| 0.049891279                                         | 10.00719424                            | 94.71942446                                          | 0.973021583                             |
| 0.012182954                                         | 13.27555556                            | 281.6355556                                          | 0.97                                    |
| 0.007227717                                         | 9.031578947                            | 976.9526316                                          | 0.917105263                             |
| 0.006508519                                         | 24.6124031                             | 453.5697674                                          | 0.944767442                             |
| 0.005193428                                         | 43.02698651                            | 410.7361319                                          | 0.985382309                             |
| 0.004033982                                         | 66.12948518                            | 485.2316693                                          | 0.978939158                             |
| 0.004768015                                         | 18.41414141                            | 867.2373737                                          | 0.964015152                             |
| 0.002992167                                         | 26.34834437                            | 1233.778808                                          | 0.957284768                             |
| 0.002464256                                         | 44.72851806                            | 1041.210461                                          | 0.979452055                             |
| 0.004289835                                         | 21.85587583                            | 959.3968958                                          | 0.981707317                             |
| 0.016837956                                         | 19.90534979                            | 158.2880658                                          | 0.935185185                             |
| 0.007690314                                         | 91.59103908                            | 243.079123                                           | 0.981410867                             |
| 0.010951161                                         | 16.06467662                            | 302.4626866                                          | 0.910447761                             |
| 0.004894269                                         | 44.78181818                            | 528.9260606                                          | 0.984545455                             |
| 0.00826782                                          | 14.2749004                             | 403.6653386                                          | 0.943227092                             |
| 0.005832743                                         | 50.48552339                            | 371.1971047                                          | 0.979120267                             |
| 0.007109183                                         | 98.04888889                            | 256.9733333                                          | 0.967222222                             |
| 0.003421644                                         | 38.41204819                            | 747.3084337                                          | 0.938554217                             |
| 0.053168628                                         | 49.82051282                            | 57.93333333                                          | 0.975                                   |
| 0.008146315                                         | 11.66115702                            | 576.1570248                                          | 0.910123967                             |
| 0.007205166                                         | 26.07637655                            | 490.339254                                           | 0.954706927                             |
| 0.015172247                                         | 15.18772563                            | 280.2238267                                          | 0.983754513                             |
| 0.001563162                                         | 68.49350649                            | 1759.608442                                          | 0.9625                                  |
| 0.004357931                                         | 29.35428571                            | 649.8057143                                          | 0.981785714                             |
| 0.002667248                                         | 28.55709343                            | 1281.206459                                          | 0.98615917                              |
| 0.003915056                                         | 45.02136182                            | 521.4339119                                          | 0.979973298                             |
| 0.002211075                                         | 61.55455177                            | 971.6594858                                          | 0.983842946                             |
| 0.004743653                                         | 107.6067992                            | 344.2738935                                          | 0.985086594                             |
| 0.001451929                                         | 39.26021505                            | 3323.088172                                          | 0.976612903                             |
| 0.025173924                                         | 3.338461538                            | 367.9384615                                          | 0.942307692                             |
| 0.010352319                                         | 8.132075472                            | 701.5                                                | 0.925707547                             |
| 0.005962933                                         | 42.31325301                            | 379.7454819                                          | 0.963855422                             |
| 0.002205892                                         | 49.48360656                            | 1109.204098                                          | 0.984016393                             |
| 0.001928364                                         | 64.22651934                            | 1149.574586                                          | 0.970994475                             |
| 0.007640424                                         | 17.93573265                            | 535.8431877                                          | 0.940231362                             |
| 0.007843197                                         | 22.40092166                            | 553.8018433                                          | 0.991359447                             |
| 0.00371652                                          | 32.51987768                            | 817.2201835                                          | 0.946100917                             |
| 0.012355312                                         | 19.9015873                             | 318.1396825                                          | 0.973809524                             |
| 0.004840892                                         | 34.13628319                            | 500.1061947                                          | 0.972123894                             |
| 0.006114165                                         | 23.08920188                            | 508.4671362                                          | 0.947183099                             |
| 0.004733604                                         | 42.55892649                            | 541.8774796                                          | 0.954492415                             |
| 0.006746884                                         | 54.80492813                            | 358.4271047                                          | 0.98613963                              |
| 0.002135712                                         | 83.74270557                            | 949.3587533                                          | 0.950762599                             |
| 0.009104113                                         | 12.71003717                            | 411.3903346                                          | 0.980483271                             |
| 0.044873544                                         | 3.808510638                            | 95.68085106                                          | 0.936170213                             |
| 0.016980196                                         | 11.01724138                            | 510.5172414                                          | 0.938577586                             |
| 0.004434254                                         | 68.3204698                             | 430.9731544                                          | 0.984270134                             |
| 0.007457775                                         | 15.87925697                            | 522.4334365                                          | 0.98374613                              |
| 0.001827798                                         | 79.04246504                            | 1238.437597                                          | 0.972812015                             |
| 0.007440902                                         | 13.02826855                            | 577.2685512                                          | 0.96819788                              |
| 0.0032747                                           | 103.580974                             | 580.3510759                                          | 0.983437146                             |
| 0.006685576                                         | 20.56190476                            | 540.2047619                                          | 0.941071429                             |
| 0.004090375                                         | 45.16666667                            | 597.3710938                                          | 0.908203125                             |
| 0.003669806                                         | 24.49565217                            | 1232.325217                                          | 0.915217391                             |
| 0.007665782                                         | 14.97368421                            | 446.4780702                                          | 0.973684211                             |
| 0.012006513                                         | 19.4640884                             | 199.9060773                                          | 1                                       |
| 0.006432071                                         | 44.68918919                            | 353.0962838                                          | 0.980996622                             |
| 0.001688888                                         | 106.436772                             | 1073.321131                                          | 0.972857737                             |
| 0.003269546                                         | 62.65248227                            | 591.8421986                                          | 0.992021277                             |
| 0.002856838                                         | 39.01121495                            | 1163.706542                                          | 0.980373832                             |
| 0.035774275                                         | 5.03125                                | 140.6875                                             | 0.9765625                               |
| 0.010709769                                         | 33.09218437                            | 266.1523046                                          | 0.96993988                              |
| 0.010362799                                         | 10.84259259                            | 445.8842593                                          | 0.927083333                             |
| 0.005631139                                         | 64.51052632                            | 424.6833333                                          | 0.986184211                             |
| 0.010724027                                         | 11.85427136                            | 330.0452261                                          | 0.977386935                             |
| 0.002224006                                         | 45.69066148                            | 1111.557393                                          | 0.962791829                             |
| 0.005290391                                         | 61.38086643                            | 421.965704                                           | 0.965478339                             |
| 0.008358349                                         | 23.04010025                            | 429.2631579                                          | 0.986842105                             |
| 0.015963832                                         | 89.12294182                            | 128.0461032                                          | 0.983534577                             |
| 0.008185513                                         | 99.50393701                            | 207.696063                                           | 0.981102362                             |
| 0.001427265                                         | 161.0556829                            | 1250.008189                                          | 0.9828038                               |
| 0.004211996                                         | 25.6984127                             | 599.968254                                           | 0.948412698                             |
| 0.005602123                                         | 27.90812721                            | 403.4381625                                          | 0.94434629                              |
| 0.016251544                                         | 16.27090301                            | 260.5752508                                          | 0.974916388                             |
| 0.004107981                                         | 37.65644172                            | 570.1319018                                          | 0.948236196                             |
| 0.002943096                                         | 48.91512346                            | 865.8549383                                          | 0.961226852                             |
| 0.009609377                                         | 11.8447205                             | 408.6335404                                          | 0.976708075                             |
| 0.002885665                                         | 32.63958641                            | 672.7311669                                          | 0.94239291                              |
| 0.003797245                                         | 64.64622337                            | 746.7172369                                          | 0.974338283                             |
| 0.050891317                                         | 3.466666667                            | 113.3                                                | 0.95                                    |
| 0.009078983                                         | 72.51875                               | 204.0708333                                          | 0.99140625                              |
| 0.003466231                                         | 109.9313052                            | 558.1452404                                          | 0.94001472                              |
| 0.017344955                                         | 17.85258964                            | 189.187251                                           | 0.979083665                             |
| 0.002663254                                         | 29.22374429                            | 1399.247717                                          | 0.943493151                             |
| 0.01344053                                          | 4.34939759                             | 1074.759036                                          | 0.963855422                             |
| 0.044160635                                         | 3.775510204                            | 111.2244898                                          | 0.984693878                             |
| 0.001786628                                         | 75.04187726                            | 1215.369675                                          | 0.973465704                             |
| 0.00744295                                          | 15.46261682                            | 769.5070093                                          | 0.977219626                             |
| 0.003554767                                         | 23.50619469                            | 878.9079646                                          | 0.966814159                             |
| 0.002233347                                         | 72.25771812                            | 1004.457718                                          | 0.976845638                             |
| 0.001429726                                         | 103.8344791                            | 1389.6367                                            | 0.9821523                               |
| 0.022423527                                         | 8.402985075                            | 177.7313433                                          | 0.938432836                             |
| 0.00324282                                          | 28.27986907                            | 878.3797054                                          | 0.990180033                             |
| 0.034625006                                         | 4.25                                   | 139.125                                              | 0.90625                                 |
| 0.020218241                                         | 7.482142857                            | 277.4821429                                          | 0.933035714                             |
| 0.008686164                                         | 14.75111111                            | 363.217778                                           | 0.976666667                             |

| wavelet.HHH_glc_m_SumVariance | wavelet.HHH_glc_m_Homogeneity1 | wavelet.HHH_glc_m_Homogeneity2 | wavelet.HHH_glc_m_ClusterShade | wavelet.HHH_glc_m_MaximumProbability | wavelet.HHH_glc_m_Idmn |
|-------------------------------|--------------------------------|--------------------------------|--------------------------------|--------------------------------------|------------------------|
| 1516.608543                   | 0.243519132                    | 0.243519132                    | -30.13716621                   | 0.032655071                          | 0.981984498            |
| 965.4349518                   | 0.367716885                    | 0.289962071                    | 22.42015551                    | 0.054007936                          | 0.979627579            |
| 1336.086188                   | 0.239937002                    | 0.149293469                    | 13.87385251                    | 0.015067694                          | 0.966160066            |
| 975.7195094                   | 0.306390288                    | 0.21767686                     | -7.172375447                   | 0.025774083                          | 0.97244757             |
| 193.3651024                   | 0.337350306                    | 0.245211542                    | -1.759126114                   | 0.028850415                          | 0.940150455            |
| 744.433991                    | 0.337646514                    | 0.249453369                    | -25.29146497                   | 0.029923636                          | 0.970029595            |
| 2186.328535                   | 0.250778357                    | 0.159849849                    | -337.73355                     | 0.014538561                          | 0.964141765            |
| 1089.63569                    | 0.257488901                    | 0.165906557                    | -18.67291507                   | 0.016568667                          | 0.958225653            |
| 1232.941105                   | 0.352264409                    | 0.265590944                    | 10.51003732                    | 0.03029106                           | 0.990476465            |
| 1355.950532                   | 0.314048908                    | 0.225688799                    | 25.39196621                    | 0.021887648                          | 0.978761354            |
| 2413.685724                   | 0.26292312                     | 0.172079827                    | 98.38411027                    | 0.014479393                          | 0.978366994            |
| 3451.739683                   | 0.254395633                    | 0.171261971                    | 35.20995988                    | 0.020513555                          | 0.976908642            |
| 3236.379391                   | 0.321236669                    | 0.233502096                    | -26.78674065                   | 0.025491202                          | 0.986786656            |
| 3009.226174                   | 0.314268115                    | 0.229612654                    | -95.33824959                   | 0.026921927                          | 0.984904797            |
| 308.4102911                   | 0.391443827                    | 0.307040935                    | -1.915597601                   | 0.037938608                          | 0.970074614            |
| 674.0847037                   | 0.540575783                    | 0.491577371                    | -2.581175386                   | 0.128968678                          | 0.989339483            |
| 650.5708142                   | 0.389402351                    | 0.304278927                    | -1.559620846                   | 0.036223354                          | 0.981862234            |
| 1516.961677                   | 0.359322451                    | 0.281158737                    | 24.67198119                    | 0.044725396                          | 0.981627828            |
| 983.2750142                   | 0.304261651                    | 0.212217699                    | -24.00967706                   | 0.023909813                          | 0.966548285            |
| 975.7944141                   | 0.37909697                     | 0.301921407                    | 13.58654255                    | 0.05719781                           | 0.978310655            |
| 649.8950474                   | 0.429058663                    | 0.355768643                    | 2.457763754                    | 0.066250328                          | 0.984756163            |
| 1864.30847                    | 0.266855824                    | 0.174735699                    | 28.39817688                    | 0.013418958                          | 0.978328685            |
| 103.3872737                   | 0.518535836                    | 0.461854647                    | 0.458294519                    | 0.097393912                          | 0.975389473            |
| 1224.454989                   | 0.264661976                    | 0.172651216                    | -25.23386744                   | 0.0159421                            | 0.9626796              |
| 1188.693912                   | 0.307708679                    | 0.224158753                    | 51.13729915                    | 0.02733559                           | 0.976227056            |
| 747.2983795                   | 0.311769184                    | 0.230964172                    | -39.25856798                   | 0.023896349                          | 0.966388873            |
| 5279.667622                   | 0.283812622                    | 0.195041141                    | -127.8939107                   | 0.018003286                          | 0.986723338            |
| 1871.937958                   | 0.280859832                    | 0.196749765                    | 237.5983203                    | 0.016816599                          | 0.965837827            |
| 3794.342338                   | 0.259829862                    | 0.181300636                    | -137.8343747                   | 0.015766069                          | 0.959442787            |
| 1532.357521                   | 0.415554951                    | 0.344934564                    | 8.213779865                    | 0.073933178                          | 0.98711333             |
| 2978.826824                   | 0.290664102                    | 0.206509507                    | -87.93507627                   | 0.017764643                          | 0.975416219            |
| 988.966798                    | 0.419025715                    | 0.345755324                    | -5.028456537                   | 0.060138852                          | 0.981698814            |
| 10895.26774                   | 0.28907046                     | 0.203675526                    | -299.0253287                   | 0.025183812                          | 0.991936747            |
| 944.8199762                   | 0.240757663                    | 0.151215141                    | -159.2286359                   | 0.03168316                           | 0.95281524             |
| 1593.446054                   | 0.208281482                    | 0.124444693                    | 306.3223267                    | 0.012308574                          | 0.947000175            |
| 986.0972701                   | 0.3550658                      | 0.269237277                    | -15.65198068                   | 0.038557613                          | 0.979888466            |
| 3437.348815                   | 0.301976395                    | 0.221359538                    | -58.16465248                   | 0.024712952                          | 0.982283118            |
| 3478.0612                     | 0.330437122                    | 0.246888589                    | -33.96584068                   | 0.035446496                          | 0.987136556            |
| 1141.578589                   | 0.269731467                    | 0.178456751                    | 290.6017397                    | 0.013396983                          | 0.968156917            |
| 1676.852241                   | 0.325141089                    | 0.241313852                    | -35.64831518                   | 0.034737794                          | 0.9760541              |
| 2200.508567                   | 0.305862433                    | 0.216771901                    | -94.3393809                    | 0.019801665                          | 0.980750164            |
| 858.5003248                   | 0.35984735                     | 0.273728613                    | -25.1886103                    | 0.034827191                          | 0.975882861            |
| 1360.995612                   | 0.343891176                    | 0.256189732                    | -3.184575551                   | 0.030329181                          | 0.981486259            |
| 1240.307445                   | 0.307276548                    | 0.217172489                    | -0.150677379                   | 0.024939604                          | 0.970684455            |
| 1354.730973                   | 0.285633304                    | 0.19559219                     | 20.07876265                    | 0.015031447                          | 0.973803721            |
| 972.5547049                   | 0.299984311                    | 0.207376118                    | 11.87504992                    | 0.022171712                          | 0.976296546            |
| 2578.14884                    | 0.326768729                    | 0.237486391                    | 5.008317794                    | 0.023840064                          | 0.989133643            |
| 1105.333107                   | 0.298409916                    | 0.209478892                    | -25.2227973                    | 0.029662261                          | 0.967280663            |
| 247.8103072                   | 0.373809358                    | 0.289125919                    | -8.268297914                   | 0.052165722                          | 0.95490515             |
| 1135.13743                    | 0.263851528                    | 0.17036954                     | 15.3808078                     | 0.017712975                          | 0.961180632            |
| 1231.283777                   | 0.363668085                    | 0.282699635                    | 2.622806907                    | 0.043111655                          | 0.980685083            |
| 1514.393741                   | 0.31922642                     | 0.231952105                    | 36.14246134                    | 0.024488166                          | 0.978059532            |
| 3671.157309                   | 0.257628586                    | 0.168703113                    | -315.8161891                   | 0.011804645                          | 0.978271286            |
| 1537.6394                     | 0.279189929                    | 0.190324012                    | 22.78104145                    | 0.017142882                          | 0.967645076            |
| 1703.711268                   | 0.421274078                    | 0.355409176                    | 5.484704366                    | 0.079919242                          | 0.987097576            |
| 1222.256635                   | 0.280265902                    | 0.190868943                    | 63.78368764                    | 0.017448518                          | 0.971993642            |
| 1360.324601                   | 0.33062199                     | 0.241686569                    | -2.83908715                    | 0.024813325                          | 0.980013826            |
| 2801.236351                   | 0.291305326                    | 0.204567741                    | 587.0566596                    | 0.017764411                          | 0.975528187            |
| 1244.226946                   | 0.411480995                    | 0.338071437                    | 11.86972277                    | 0.061847078                          | 0.988339377            |
| 563.3860421                   | 0.44895012                     | 0.376311803                    | 5.621427557                    | 0.063245146                          | 0.988734984            |
| 986.8434832                   | 0.375489133                    | 0.289144142                    | 2.515837539                    | 0.039810575                          | 0.987453899            |
| 3236.473809                   | 0.311820678                    | 0.22983054                     | -145.7002453                   | 0.029435819                          | 0.98384926             |
| 1838.683107                   | 0.359855539                    | 0.280635151                    | -25.57947006                   | 0.046809175                          | 0.98169944             |
| 3781.107829                   | 0.48774675                     | 0.429141308                    | -27.91163036                   | 0.10106034                           | 0.99438564             |
| 242.6382045                   | 0.374725823                    | 0.289748739                    | 2.528028896                    | 0.037768541                          | 0.95927242             |
| 650.1158559                   | 0.399986585                    | 0.323065032                    | 6.051154019                    | 0.055251516                          | 0.982493909            |
| 977.7279982                   | 0.252067196                    | 0.158959294                    | -4.104313893                   | 0.017534154                          | 0.95988567             |
| 1223.561687                   | 0.350020524                    | 0.267465292                    | -20.65400165                   | 0.041011713                          | 0.97852623             |
| 860.8393093                   | 0.306194788                    | 0.213173631                    | -23.40043365                   | 0.022980778                          | 0.962859367            |
| 3238.145614                   | 0.266876536                    | 0.178475697                    | -90.58832195                   | 0.013425218                          | 0.978891               |
| 1091.396413                   | 0.356628166                    | 0.274706754                    | 10.31803579                    | 0.042225383                          | 0.981334518            |
| 1227.396645                   | 0.346213002                    | 0.261420721                    | 85.1497481                     | 0.037136755                          | 0.983622015            |
| 319.1051452                   | 0.494888638                    | 0.433606086                    | 0.013714979                    | 0.09592606                           | 0.981482063            |
| 561.6310159                   | 0.480258903                    | 0.417485193                    | 5.329997174                    | 0.094292195                          | 0.989416701            |
| 3971.105464                   | 0.36776135                     | 0.29003865                     | 7.305165134                    | 0.042738258                          | 0.990248149            |
| 1519.04321                    | 0.264802798                    | 0.174529682                    | -15.33846097                   | 0.013402409                          | 0.974373938            |
| 966.2505223                   | 0.258564698                    | 0.165109813                    | 32.00012802                    | 0.014521574                          | 0.964589386            |
| 648.0704052                   | 0.287316894                    | 0.195739839                    | 3.922458245                    | 0.016904652                          | 0.962364945            |
| 1498.591263                   | 0.330594118                    | 0.242864898                    | 1.940322489                    | 0.028938913                          | 0.978374186            |
| 2360.280433                   | 0.286241254                    | 0.203413144                    | -34.33216364                   | 0.02389117                           | 0.968878442            |
| 1127.40481                    | 0.369532502                    | 0.284544889                    | -6.312851601                   | 0.038175454                          | 0.977302995            |
| 1659.969295                   | 0.275528572                    | 0.185935813                    | -8.132402709                   | 0.014973221                          | 0.972321289            |
| 2044.31991                    | 0.255729693                    | 0.167038364                    | 180.3446952                    | 0.012733569                          | 0.978937297            |
| 193.1826808                   | 0.437608399                    | 0.361099295                    | -14.08942118                   | 0.073888162                          | 0.954681796            |
| 549.5393965                   | 0.391292625                    | 0.307321971                    | -0.934906834                   | 0.039182248                          | 0.9788229              |
| 1357.119245                   | 0.323537153                    | 0.235180081                    | 12.41372411                    | 0.021317985                          | 0.982981571            |
| 460.0273924                   | 0.375953708                    | 0.29015239                     | 3.397132721                    | 0.034032134                          | 0.980361082            |
| 3675.570709                   | 0.225161377                    | 0.140501298                    | -122.8491754                   | 0.010634272                          | 0.966452981            |
| 3075.213212                   | 0.323320879                    | 0.238938263                    | -39.58438448                   | 0.038889614                          | 0.984037173            |
| 305.4032773                   | 0.359672219                    | 0.272801487                    | -26.94655569                   | 0.054550694                          | 0.949652054            |
| 3736.570461                   | 0.358279233                    | 0.278093598                    | -20.72148077                   | 0.046614167                          | 0.989774416            |
| 2217.149338                   | 0.226191691                    | 0.140576277                    | 33.69704383                    | 0.017859152                          | 0.960436477            |
| 2416.995994                   | 0.241831047                    | 0.151930673                    | 113.8875205                    | 0.01504418                           | 0.971310039            |
| 3025.913126                   | 0.357463744                    | 0.281235452                    | -59.45345154                   | 0.052136455                          | 0.987936759            |
| 4489.000527                   | 0.373589281                    | 0.296313156                    | -38.52296537                   | 0.049827241                          | 0.992338095            |
| 378.5826211                   | 0.295923808                    | 0.203228823                    | 0.301072305                    | 0.027307951                          | 0.93883985             |
| 2755.782352                   | 0.277382683                    | 0.188626487                    | -19.95736285                   | 0.018392857                          | 0.978747232            |
| 247.0398884                   | 0.389732398                    | 0.305494845                    | -3.645568817                   | 0.073067617                          | 0.959872786            |
| 643.3144068                   | 0.374990388                    | 0.28988184                     | -21.71005288                   | 0.042142971                          | 0.974494235            |
| 997.7567364                   | 0.42517624                     | 0.354002885                    | -3.685613352                   | 0.076953543                          | 0.981345299            |

| wavelet.HHH_glcum_SumVariance2 | wavelet.HHH_glcum_Contrast | wavelet.HHH_glcum_DifferenceEntropy | wavelet.HHH_glcum_InverseVariance | wavelet.HHH_glcum_Entropy | wavelet.HHH_glcum_Dissimilarity |
|--------------------------------|----------------------------|-------------------------------------|-----------------------------------|---------------------------|---------------------------------|
| 35.13239                       | 39.60682174                | 3.581632194                         | 0.246374979                       | 7.36411828                | 4.353770873                     |
| 28.51419129                    | 35.02126246                | 3.55561047                          | 0.270526342                       | 7.338132564               | 4.025970534                     |
| 68.11863175                    | 71.34773206                | 4.045677496                         | 0.161909153                       | 7.945640582               | 6.452508728                     |
| 30.91272335                    | 37.59776393                | 3.687321773                         | 0.222961511                       | 7.844833642               | 4.609172081                     |
| 17.42424196                    | 20.71944259                | 3.259200411                         | 0.244766772                       | 6.8888747                 | 3.578150443                     |
| 25.05352422                    | 26.60695472                | 3.41879041                          | 0.255308631                       | 7.200942031               | 3.841627735                     |
| 76.20455134                    | 66.4603789                 | 3.96975124                          | 0.17072081                        | 7.856875174               | 6.143497902                     |
| 43.58176506                    | 55.49275358                | 3.945793104                         | 0.176756316                       | 8.209654916               | 5.76545188                      |
| 22.95910113                    | 25.23822593                | 3.375355877                         | 0.269391779                       | 7.25411426                | 3.628484646                     |
| 35.83846336                    | 39.59752449                | 3.693401994                         | 0.230694413                       | 7.9113411                 | 4.559833272                     |
| 54.97150526                    | 59.77043416                | 3.951201168                         | 0.181962126                       | 8.13859643                | 5.773514589                     |
| 102.2947067                    | 115.8039919                | 4.340852513                         | 0.168984975                       | 8.698398546               | 7.443788907                     |
| 33.55267395                    | 40.64693066                | 3.653817984                         | 0.237514386                       | 7.668374549               | 4.472106942                     |
| 51.2018299                     | 57.237625                  | 3.794749221                         | 0.230344074                       | 7.821554079               | 5.082283069                     |
| 12.58890414                    | 13.42300479                | 2.996876218                         | 0.310887681                       | 6.506672555               | 2.779387675                     |
| 6.918392993                    | 7.260994648                | 2.506917187                         | 0.413390736                       | 5.253928139               | 1.726896667                     |
| 13.34940841                    | 14.46233594                | 3.013061817                         | 0.306760447                       | 6.470818101               | 2.828233576                     |
| 37.29381208                    | 42.24405709                | 3.618080853                         | 0.2712022                         | 7.501458372               | 4.291451772                     |
| 29.36509326                    | 34.28818525                | 3.56445815                          | 0.221217187                       | 7.459864855               | 4.438508343                     |
| 24.88440251                    | 27.98797947                | 3.426851502                         | 0.28310188                        | 7.272226288               | 3.683888455                     |
| 12.76709614                    | 13.78304377                | 3.011448269                         | 0.333617005                       | 6.509054305               | 2.649502672                     |
| 49.15593351                    | 54.66680812                | 3.928438733                         | 0.178641845                       | 8.303926191               | 5.581911298                     |
| 4.353714051                    | 4.593933697                | 2.327375376                         | 0.430780084                       | 5.109037688               | 1.578723522                     |
| 47.61286508                    | 55.84508308                | 3.905493356                         | 0.176675651                       | 7.848039507               | 5.62345544                      |
| 48.99535146                    | 52.13283868                | 3.832189587                         | 0.223439294                       | 7.989810972               | 5.143406495                     |
| 33.83304602                    | 36.66195513                | 3.621222595                         | 0.229909069                       | 7.582814055               | 4.511070173                     |
| 51.97507848                    | 61.6892584                 | 3.935886065                         | 0.201467176                       | 8.311007425               | 5.524638615                     |
| 71.249149                      | 85.15032588                | 4.07224823                          | 0.201480883                       | 8.295584173               | 6.389997255                     |
| 129.4706786                    | 160.5108845                | 4.379716264                         | 0.184448275                       | 8.779491973               | 8.498599692                     |
| 22.82510435                    | 24.87300023                | 3.29053798                          | 0.315116508                       | 6.848590281               | 3.27610587                      |
| 58.1588076                     | 72.50798585                | 4.029331158                         | 0.210932309                       | 8.41105667                | 5.911003418                     |
| 15.32376344                    | 18.29170971                | 3.130463113                         | 0.326677384                       | 6.699735061               | 2.927270356                     |
| 75.26011041                    | 82.74497051                | 4.013796024                         | 0.206948699                       | 8.221939149               | 5.89225554                      |
| 56.93264632                    | 72.57650132                | 3.836977646                         | 0.165096389                       | 6.513041097               | 6.511690408                     |
| 109.7398124                    | 130.8905046                | 4.363802805                         | 0.131654738                       | 8.086884567               | 8.643476437                     |
| 20.68854374                    | 23.98337998                | 3.371480645                         | 0.267503723                       | 7.18612051                | 3.602760743                     |
| 63.93617687                    | 75.4606099                 | 4.032175563                         | 0.216576174                       | 8.316184337               | 5.929380325                     |
| 37.85221329                    | 42.06833935                | 3.709449929                         | 0.239074812                       | 7.818358591               | 4.556776294                     |
| 58.42658249                    | 62.80666715                | 3.912266052                         | 0.184832489                       | 8.068636425               | 5.739274132                     |
| 40.68107808                    | 46.25965278                | 3.716800127                         | 0.243694417                       | 7.629740107               | 4.704009838                     |
| 37.59062128                    | 43.22637123                | 3.722255376                         | 0.225406156                       | 7.797935009               | 4.735104224                     |
| 21.33728347                    | 22.92825606                | 3.308741338                         | 0.275311377                       | 7.031605258               | 3.480688281                     |
| 22.82681659                    | 26.29210107                | 3.411301204                         | 0.260300802                       | 7.271007218               | 3.756753347                     |
| 31.92128985                    | 38.31599215                | 3.672091366                         | 0.216442876                       | 7.65193044                | 4.60603764                      |
| 41.17411428                    | 49.572684                  | 3.845694979                         | 0.206030346                       | 8.087724346               | 5.190489603                     |
| 29.27385183                    | 35.82112438                | 3.638523331                         | 0.214340776                       | 7.7326052                 | 4.529384605                     |
| 28.37872439                    | 32.58003308                | 3.558287282                         | 0.241184288                       | 7.642774774               | 4.137174572                     |
| 38.94843224                    | 46.23340042                | 3.76760173                          | 0.212680859                       | 7.569401811               | 4.982284562                     |
| 16.47981721                    | 17.62554337                | 3.054071296                         | 0.293109099                       | 6.071948075               | 3.14630979                      |
| 44.72451638                    | 51.7524738                 | 3.864044427                         | 0.170050777                       | 7.834824555               | 5.535878471                     |
| 23.12516915                    | 27.63316667                | 3.446470952                         | 0.275083678                       | 7.315295178               | 3.740385072                     |
| 42.01288781                    | 50.16174749                | 3.684333316                         | 0.233480042                       | 7.650905079               | 4.754778529                     |
| 78.99351199                    | 76.554223                  | 4.122120429                         | 0.176514498                       | 8.797359777               | 6.320270667                     |
| 62.10629772                    | 56.66193975                | 3.885531313                         | 0.20201654                        | 7.947975642               | 5.518363208                     |
| 27.88033897                    | 30.16956504                | 3.348646274                         | 0.322058678                       | 6.967928702               | 3.465374076                     |
| 46.30226513                    | 53.39319074                | 3.883181264                         | 0.199094555                       | 8.002092214               | 5.399894527                     |
| 25.75775769                    | 30.24166887                | 3.499882785                         | 0.252462292                       | 7.465733487               | 4.00710818                      |
| 83.7522913                     | 94.39515431                | 3.986301158                         | 0.211680969                       | 8.076544714               | 6.100390713                     |
| 18.88121921                    | 21.51604566                | 3.171790122                         | 0.326188815                       | 6.544505318               | 3.082358743                     |
| 8.073039027                    | 8.817757057                | 2.677114091                         | 0.375422797                       | 5.808784387               | 2.15570502                      |
| 14.46088687                    | 17.36629548                | 3.150129206                         | 0.289529951                       | 6.746629716               | 3.085474341                     |
| 57.36145456                    | 59.68400407                | 3.930648561                         | 0.225697284                       | 8.341155414               | 5.334265614                     |
| 29.59871799                    | 33.80917201                | 3.568688694                         | 0.265098873                       | 7.524099659               | 4.062564933                     |
| 12.92198007                    | 13.90491002                | 2.833249478                         | 0.381728869                       | 5.913486544               | 2.298418299                     |
| 15.70930235                    | 16.94484329                | 3.066174749                         | 0.300919737                       | 6.382772929               | 3.083975677                     |
| 17.301358                      | 18.46167198                | 3.163066101                         | 0.321737753                       | 6.714520117               | 3.031006252                     |
| 41.66620871                    | 53.05449838                | 3.871582018                         | 0.173626886                       | 7.723569642               | 5.699407313                     |
| 27.0279307                     | 31.11095058                | 3.512526249                         | 0.266518265                       | 7.452647515               | 3.969274823                     |
| 27.31538739                    | 31.04172807                | 3.51257006                          | 0.223363048                       | 7.327923308               | 4.27798039                      |
| 64.28499957                    | 71.17767287                | 4.0627158                           | 0.183829025                       | 8.496007214               | 6.092068213                     |
| 24.53630977                    | 29.61573846                | 3.481050777                         | 0.270761748                       | 7.340665588               | 3.86570739                      |
| 29.34506058                    | 31.81439468                | 3.493647476                         | 0.261041685                       | 7.301607562               | 3.979274232                     |
| 6.880362955                    | 7.35375372                 | 2.603252069                         | 0.393518931                       | 5.625818065               | 1.908513534                     |
| 9.516048753                    | 10.20761554                | 2.775632142                         | 0.375423253                       | 5.937772312               | 2.169189522                     |
| 36.8655348                     | 41.02083707                | 3.571478581                         | 0.283223111                       | 7.564115254               | 4.10437103                      |
| 55.31767228                    | 60.88661405                | 3.972395288                         | 0.183241954                       | 8.262911039               | 5.80097359                      |
| 45.81954361                    | 52.09984788                | 3.892330253                         | 0.172962013                       | 8.186526439               | 5.590482693                     |
| 38.41486904                    | 41.65880832                | 3.722044703                         | 0.20872646                        | 7.751040532               | 4.901069155                     |
| 28.02817621                    | 33.12124518                | 3.560757966                         | 0.244822988                       | 7.552762892               | 4.15704832                      |
| 74.61344411                    | 88.55250186                | 4.097154426                         | 0.210141152                       | 8.510832904               | 6.368761677                     |
| 17.96776598                    | 19.75526087                | 3.211701701                         | 0.286506297                       | 6.686236663               | 3.275311642                     |
| 49.46376191                    | 54.76427836                | 3.912819006                         | 0.192142345                       | 8.199842192               | 5.523130394                     |
| 67.27290262                    | 75.98175784                | 4.108443749                         | 0.17757206                        | 8.60887                   | 6.351661482                     |
| 8.7297251                      | 9.195521749                | 2.668732997                         | 0.351963516                       | 5.471049477               | 2.262516043                     |
| 13.61702976                    | 14.4403412                 | 3.051952695                         | 0.304677426                       | 6.716657868               | 2.85037664                      |
| 31.49966979                    | 34.10629963                | 3.603754281                         | 0.240356502                       | 7.839478654               | 4.265847692                     |
| 15.53186549                    | 16.74174772                | 3.126278857                         | 0.293257506                       | 6.739168585               | 3.066040965                     |
| 100.7388347                    | 126.5085457                | 4.426444097                         | 0.149003968                       | 9.020218013               | 8.170535894                     |
| 49.1950499                     | 53.69371315                | 3.527490649                         | 0.255580949                       | 6.534526672               | 4.775869518                     |
| 18.72014309                    | 19.8263958                 | 3.06301032                          | 0.280653408                       | 5.95362183                | 3.346894977                     |
| 31.12395109                    | 35.68865825                | 3.551323609                         | 0.272515609                       | 7.436395298               | 4.050854607                     |
| 90.70332347                    | 118.3681863                | 4.359564987                         | 0.151476759                       | 8.477598424               | 7.916464424                     |
| 63.71306378                    | 73.54024682                | 4.109284889                         | 0.155721067                       | 8.429270818               | 6.550723556                     |
| 42.45242652                    | 49.3651287                 | 3.720264503                         | 0.265416339                       | 7.637827711               | 4.560160785                     |
| 31.75568592                    | 35.6685643                 | 3.510358663                         | 0.287185336                       | 7.369956694               | 3.906610285                     |
| 29.76787381                    | 32.40281215                | 3.543168739                         | 0.214558418                       | 7.187560279               | 4.477601863                     |
| 63.95320265                    | 65.24486251                | 3.967441928                         | 0.19846332                        | 8.208922784               | 5.713143355                     |
| 13.35973489                    | 13.2783127                 | 2.927908041                         | 0.308283634                       | 5.826734169               | 2.802021371                     |
| 18.48186188                    | 19.70415928                | 3.173889164                         | 0.28983119                        | 6.622362206               | 3.205662921                     |
| 16.62748825                    | 18.79334434                | 3.120728883                         | 0.330833441                       | 6.456410481               | 2.925099254                     |







| wavelet.HHH_glmc_Id | wavelet.HHH_glmc_ClusterTendency | wavelet.HHH_firorder_InterquartileRange | wavelet.HHH_firorder_Skewness | wavelet.HHH_firorder_Uniformity | wavelet.HHH_firorder_MeanAbsoluteDeviation |
|---------------------|----------------------------------|-----------------------------------------|-------------------------------|---------------------------------|--------------------------------------------|
| 0.329787077         | 35.13239                         | 103.4538907                             | -0.176766265                  | 0.086241764                     | 73.0962222                                 |
| 0.367716885         | 28.51419129                      | 80.53111922                             | 0.07528597                    | 0.103043652                     | 66.34504009                                |
| 0.239937002         | 68.11863175                      | 163.1095688                             | 0.015998097                   | 0.05670114                      | 108.9980324                                |
| 0.306390288         | 30.91272335                      | 112.0750046                             | 0.005727906                   | 0.079994671                     | 74.67308737                                |
| 0.337350306         | 17.42424196                      | 102.3128841                             | -0.091534627                  | 0.092465142                     | 60.86623002                                |
| 0.337646514         | 25.05352422                      | 99.40120519                             | -0.344734521                  | 0.089517691                     | 66.89907988                                |
| 0.250778357         | 76.20455134                      | 165.7745943                             | -0.560710722                  | 0.056274159                     | 108.0815085                                |
| 0.257488901         | 43.58176506                      | 142.0110101                             | -0.009441362                  | 0.062228836                     | 92.77360757                                |
| 0.352264409         | 22.95910113                      | 86.49894561                             | 0.280135282                   | 0.10097424                      | 59.31646059                                |
| 0.314048908         | 35.83846336                      | 108.4821103                             | -0.010045048                  | 0.079264992                     | 76.32250413                                |
| 0.26292312          | 54.97150526                      | 145.9710763                             | -0.061782345                  | 0.060817716                     | 98.0313782                                 |
| 0.254395633         | 102.2947067                      | 152.0353488                             | -0.028381743                  | 0.057007072                     | 119.6323286                                |
| 0.321236669         | 33.55267395                      | 106.3425261                             | -0.164498061                  | 0.084690929                     | 72.04727781                                |
| 0.314268115         | 51.2018299                       | 112.9579755                             | -0.184197295                  | 0.075009361                     | 84.8038696                                 |
| 0.391443827         | 12.58890414                      | 74.72475438                             | -0.002979256                  | 0.122921338                     | 47.28515659                                |
| 0.540575783         | 69.818392993                     | 27.69433281                             | -0.203794938                  | 0.230377634                     | 28.48026506                                |
| 0.389402351         | 13.34940841                      | 77.21774824                             | -0.215429003                  | 0.119276525                     | 49.19963658                                |
| 0.359322451         | 37.29381208                      | 85.47638545                             | 0.099110348                   | 0.09750573                      | 69.79515915                                |
| 0.304261651         | 29.36509326                      | 112.4733397                             | -0.113257787                  | 0.079575111                     | 74.25808016                                |
| 0.37909697          | 24.88440251                      | 75.9557071                              | 0.18190733                    | 0.107645673                     | 60.55405297                                |
| 0.429058663         | 12.76709614                      | 61.79117513                             | 0.023325939                   | 0.134495505                     | 45.29967448                                |
| 0.266855824         | 49.15593351                      | 141.3796495                             | -0.20830841                   | 0.063636425                     | 92.41495544                                |
| 0.518535836         | 4.353714051                      | 39.85087162                             | 0.044041584                   | 0.211961717                     | 26.61530756                                |
| 0.264661976         | 47.61286508                      | 148.9428425                             | -0.122775631                  | 0.061492646                     | 96.57648349                                |
| 0.307708679         | 48.99535146                      | 129.5856131                             | 0.096360844                   | 0.069472191                     | 89.10485917                                |
| 0.31769184          | 33.83304602                      | 116.155772                              | -0.33278141                   | 0.075106512                     | 78.61410782                                |
| 0.283812622         | 51.97507848                      | 128.8534459                             | -0.456396065                  | 0.067660155                     | 91.60023522                                |
| 0.280859832         | 71.249149                        | 132.4917421                             | 0.362538758                   | 0.063494375                     | 105.7653011                                |
| 0.259829862         | 129.4706786                      | 165.945198                              | 0.014527561                   | 0.049276377                     | 144.175518                                 |
| 0.41554951          | 22.82510435                      | 62.89476834                             | 0.080307821                   | 0.128282927                     | 53.48654427                                |
| 0.290664102         | 58.1588076                       | 120.9144794                             | -0.322055893                  | 0.068007937                     | 95.15302287                                |
| 0.419025715         | 15.32376344                      | 61.27568641                             | -0.101335448                  | 0.134256432                     | 47.46197355                                |
| 0.28907046          | 75.26011041                      | 120.0300738                             | -0.544311398                  | 0.070599254                     | 96.56795954                                |
| 0.240757663         | 56.93264632                      | 145.367018                              | -0.043566629                  | 0.06693787                      | 99.7890505                                 |
| 0.208281482         | 109.7398124                      | 194.0546769                             | 0.09974393                    | 0.045706924                     | 137.1515025                                |
| 0.3550658           | 20.68854374                      | 79.94238094                             | -0.143412301                  | 0.104278992                     | 58.90435163                                |
| 0.301976395         | 60.93617687                      | 116.1448679                             | -0.066046355                  | 0.068925781                     | 98.23081112                                |
| 0.330437122         | 37.85221329                      | 96.0038989                              | -0.133823878                  | 0.088542628                     | 73.28866758                                |
| 0.269731467         | 58.42658249                      | 145.0548022                             | 0.449873022                   | 0.061281509                     | 100.3240507                                |
| 0.325141089         | 40.68107808                      | 100.510378                              | -0.228884831                  | 0.082303633                     | 78.54583431                                |
| 0.305862433         | 37.59062128                      | 114.0343481                             | -0.281050316                  | 0.076154015                     | 80.53145478                                |
| 0.35984735          | 21.33728347                      | 88.33049467                             | -0.371410964                  | 0.099940652                     | 60.14393411                                |
| 0.343891176         | 22.82681659                      | 88.41602515                             | -0.122232759                  | 0.096729279                     | 62.38900212                                |
| 0.307267548         | 31.92128985                      | 108.5391334                             | -0.063854324                  | 0.080591077                     | 74.47884524                                |
| 0.285633304         | 41.17411428                      | 123.8278426                             | 0.024522918                   | 0.070919826                     | 83.9539591                                 |
| 0.299984311         | 29.27385183                      | 116.892245                              | 0.068541941                   | 0.077717414                     | 75.00146675                                |
| 0.326768729         | 28.37872439                      | 98.662445                               | -0.136022384                  | 0.088326367                     | 68.11358681                                |
| 0.298409916         | 38.94843224                      | 110.4800469                             | -0.122293463                  | 0.074886213                     | 84.30209113                                |
| 0.373809358         | 16.47981721                      | 70.08020028                             | -0.155458252                  | 0.120405436                     | 51.31302901                                |
| 0.263851528         | 44.72451638                      | 143.4217408                             | -0.12690025                   | 0.063742617                     | 93.87040079                                |
| 0.363668085         | 23.12516915                      | 79.48312707                             | -0.089765288                  | 0.103127013                     | 60.94765776                                |
| 0.31922642          | 42.01288781                      | 119.037694                              | -0.075331765                  | 0.076591284                     | 82.04266815                                |
| 0.257628586         | 78.99351199                      | 154.6005891                             | -0.296772406                  | 0.058580186                     | 108.9859931                                |
| 0.279189929         | 62.10629772                      | 134.2177365                             | -0.21434742                   | 0.065113762                     | 94.65050456                                |
| 0.421724078         | 27.88033897                      | 50.18632432                             | 0.084564576                   | 0.150423451                     | 51.67887561                                |
| 0.280265902         | 46.30226513                      | 127.3558599                             | 0.109384754                   | 0.066686857                     | 89.75502847                                |
| 0.33062199          | 25.75775769                      | 98.70048283                             | -0.138417335                  | 0.091584986                     | 65.63047984                                |
| 0.291305326         | 83.7522913                       | 124.2616525                             | 0.658201492                   | 0.069711439                     | 101.2816894                                |
| 0.411480995         | 18.88121921                      | 71.7848309                              | 0.0303577                     | 0.122146829                     | 53.23130955                                |
| 0.44895012          | 8.073039027                      | 57.7264436                              | 0.135708991                   | 0.155445842                     | 37.86589858                                |
| 0.375489133         | 14.46088687                      | 75.98490054                             | 0.070400797                   | 0.11607223                      | 51.04391656                                |
| 0.311820678         | 57.36145456                      | 114.8920895                             | -0.312711302                  | 0.073498815                     | 88.59462013                                |
| 0.359855539         | 29.59871799                      | 85.24697128                             | -0.334434073                  | 0.099503357                     | 65.72315681                                |
| 0.48774675          | 12.92198007                      | 42.61399416                             | -0.75408979                   | 0.177640235                     | 38.34665865                                |
| 0.374725823         | 15.70930235                      | 77.42941605                             | 0.072932316                   | 0.107817112                     | 54.45565282                                |
| 0.399986585         | 17.301358                        | 65.46870037                             | 0.033234506                   | 0.123510195                     | 52.0515998                                 |
| 0.252067196         | 41.66620871                      | 148.6517171                             | -0.039831792                  | 0.063116803                     | 94.48707874                                |
| 0.350020524         | 27.0279307                       | 85.12228982                             | -0.222506062                  | 0.099939936                     | 64.60154238                                |
| 0.306194788         | 27.31538739                      | 115.3782015                             | -0.293589167                  | 0.079058497                     | 74.09338504                                |
| 0.266876536         | 64.28499957                      | 141.0602977                             | -0.102437604                  | 0.061978116                     | 98.25689856                                |
| 0.356628166         | 24.53630977                      | 85.12491331                             | -0.10559828                   | 0.098586608                     | 64.40658626                                |
| 0.346213002         | 29.34506058                      | 90.10449177                             | 0.432630988                   | 0.094703528                     | 67.4596685                                 |
| 0.494888638         | 6.880362955                      | 42.66424708                             | -0.021205679                  | 0.18704104                      | 32.29472612                                |
| 0.480258903         | 9.516048753                      | 43.7137204                              | 0.19758542                    | 0.177500168                     | 36.0132629                                 |
| 0.36776135          | 36.86555348                      | 78.57765403                             | -0.044833096                  | 0.103715285                     | 66.95706681                                |
| 0.264802798         | 55.31767228                      | 144.2294582                             | -0.052556686                  | 0.062025475                     | 96.50952057                                |
| 0.258564698         | 45.81954361                      | 140.6853697                             | 0.187991397                   | 0.063192831                     | 92.28485128                                |
| 0.287316894         | 38.41486904                      | 133.3947073                             | -0.053969429                  | 0.070373555                     | 83.31345482                                |
| 0.330594118         | 28.02817621                      | 98.13746445                             | -0.12065755                   | 0.090773649                     | 67.70447062                                |
| 0.286241254         | 74.61344411                      | 143.2010056                             | 0.009327497                   | 0.059819628                     | 111.410271                                 |
| 0.369532502         | 17.96776598                      | 79.46929263                             | -0.249096813                  | 0.111189846                     | 53.99169393                                |
| 0.275528572         | 49.46376191                      | 137.5315746                             | -0.072493686                  | 0.06560988                      | 90.57131434                                |
| 0.255729693         | 67.27290262                      | 155.3174611                             | 0.272257521                   | 0.055934219                     | 109.2446898                                |
| 0.437608399         | 8.7297251                        | 53.5246742                              | -0.587412575                  | 0.161189061                     | 37.13465289                                |
| 0.391292625         | 13.61702976                      | 75.23435822                             | -0.110821549                  | 0.116703443                     | 49.84194761                                |
| 0.323537153         | 31.49966979                      | 104.6571373                             | 0.012977855                   | 0.082903697                     | 71.92838409                                |
| 0.375953708         | 15.53186549                      | 85.68222292                             | 0.073413691                   | 0.104618658                     | 55.17885142                                |
| 0.225161377         | 100.7388347                      | 198.012413                              | -0.082704256                  | 0.044418077                     | 136.3592446                                |
| 0.323320879         | 49.1950499                       | 97.85192801                             | -0.514432877                  | 0.083997731                     | 86.92238047                                |
| 0.359672219         | 18.72014309                      | 77.17093118                             | -0.56767687                   | 0.107845805                     | 56.17447965                                |
| 0.358279233         | 31.12395109                      | 81.59639705                             | -0.1868316                    | 0.102396772                     | 66.0824536                                 |
| 0.226191691         | 90.70332347                      | 196.9527169                             | 0.048197529                   | 0.047283904                     | 130.7047443                                |
| 0.241831047         | 63.71306378                      | 172.8509489                             | 0.154816722                   | 0.052877785                     | 112.9745708                                |
| 0.357463744         | 42.45242652                      | 81.19351664                             | -0.244841598                  | 0.102940083                     | 72.76098129                                |
| 0.373589281         | 31.75568592                      | 73.8470435                              | -0.210793963                  | 0.109613465                     | 63.57003715                                |
| 0.295923808         | 29.76787381                      | 130.2477584                             | 0.006390959                   | 0.074255183                     | 79.06659795                                |
| 0.277382683         | 63.95320265                      | 135.0672357                             | 0.06489857                    | 0.065295782                     | 95.25952415                                |
| 0.389732398         | 13.35973489                      | 76.76021815                             | 0.11158263                    | 0.132262542                     | 50.05504061                                |
| 0.374990388         | 18.48186188                      | 78.7113845                              | -0.412302521                  | 0.111604625                     | 55.98855121                                |
| 0.42517624          | 16.62748825                      | 63.79488372                             | -0.172658106                  | 0.128247414                     | 50.039014                                  |

| wavelet.HHH_firstorder_Energy | wavelet.HHH_firstorder_RobustMeanAbsoluteDeviation | wavelet.HHH_firstorder_Median | wavelet.HHH_firstorder_TotalEnergy | wavelet.HHH_firstorder_Maximum |
|-------------------------------|----------------------------------------------------|-------------------------------|------------------------------------|--------------------------------|
| 7939992.12                    | 42.96944858                                        | 0.169186703                   | 214379787.2                        | 574.9868926                    |
| 20404633.76                   | 36.26183237                                        | 0.090787887                   | 550925111.4                        | 526.1980575                    |
| 9042393.616                   | 70.1925195                                         | 4.917143818                   | 244144627.6                        | 559.069319                     |
| 26999437                      | 46.84037429                                        | 0.849474282                   | 728984798.9                        | 448.7879501                    |
| 2096489.217                   | 42.3387211                                         | 4.098975248                   | 56605208.87                        | 206.0242828                    |
| 5266083.833                   | 42.0603185                                         | 2.027145562                   | 142184263.5                        | 317.7930814                    |
| 6790384.857                   | 71.46988733                                        | 0.763740164                   | 183340391.1                        | 351.2234931                    |
| 14791798.55                   | 60.55001784                                        | 0.783356067                   | 399378560.8                        | 399.330362                     |
| 14282720.69                   | 36.82047557                                        | 0.206283552                   | 385633458.7                        | 758.7928094                    |
| 33948795.77                   | 47.19691954                                        | 0.842602716                   | 916617485.8                        | 510.600173                     |
| 14576730.74                   | 63.20954163                                        | 4.788072665                   | 393571730                          | 578.0292149                    |
| 45859992.55                   | 67.25504515                                        | 2.150318873                   | 1238219799                         | 855.267071                     |
| 21513901.77                   | 44.14098366                                        | -0.518566446                  | 580875347.7                        | 559.8406832                    |
| 17377435.72                   | 49.50269256                                        | 1.212676144                   | 469190764.5                        | 718.03756                      |
| 3489769.438                   | 31.24407113                                        | -0.084453075                  | 94223774.83                        | 242.0077572                    |
| 15171693.38                   | 13.61468765                                        | -0.078160564                  | 409635721.2                        | 261.9309087                    |
| 3057702.227                   | 32.04188113                                        | 1.306623584                   | 82557960.14                        | 311.838643                     |
| 26114175.42                   | 37.5765331                                         | -0.628773593                  | 705082736.4                        | 587.1861409                    |
| 5573402.224                   | 48.11581133                                        | 1.609122771                   | 150481860.1                        | 322.8822395                    |
| 21462030.19                   | 34.54909231                                        | -1.285176535                  | 579474815.1                        | 415.9370895                    |
| 21032934.37                   | 27.15636431                                        | 0.141938861                   | 567889228                          | 360.8338613                    |
| 26265772.44                   | 59.68020155                                        | -1.045664113                  | 709175855.8                        | 610.3015965                    |
| 3605849.668                   | 16.57551742                                        | -0.052276135                  | 97357941.03                        | 159.0245128                    |
| 7719105.548                   | 63.54991944                                        | 3.318241226                   | 208415849.8                        | 403.507373                     |
| 18388141.21                   | 54.22467846                                        | -0.876703991                  | 496479812.7                        | 618.6370011                    |
| 7530576.526                   | 50.87274328                                        | 5.183280005                   | 203325566.2                        | 375.5141478                    |
| 59270362.71                   | 54.85196472                                        | 1.269717333                   | 1600299793                         | 668.1648935                    |
| 32273417.18                   | 59.35480197                                        | -7.596611651                  | 871382264                          | 566.5788715                    |
| 76535908.76                   | 77.59665691                                        | 6.351656116                   | 2066469537                         | 624.4882036                    |
| 16972530.12                   | 28.31738645                                        | 0.804542658                   | 458258313.2                        | 517.5373691                    |
| 58284141.03                   | 54.45169267                                        | 2.716524436                   | 1573671808                         | 539.074019                     |
| 28073650.39                   | 26.9792116                                         | 1.184817691                   | 757988560.4                        | 315.6234906                    |
| 47616547.23                   | 53.25244032                                        | -0.004068805                  | 1285646775                         | 1045.253207                    |
| 2018355.222                   | 59.03487512                                        | -6.969518972                  | 54495590.99                        | 456.8748768                    |
| 11435278.26                   | 84.81093091                                        | -6.061488704                  | 308752513                          | 590.316641                     |
| 13514418.7                    | 35.81969765                                        | 0.450380067                   | 364889304.8                        | 391.0731665                    |
| 59095160.33                   | 55.31769098                                        | 2.979168593                   | 1595569329                         | 755.31347                      |
| 38147910.15                   | 42.52629072                                        | 0.731092864                   | 1029993574                         | 575.4968607                    |
| 15756819.49                   | 61.66981505                                        | 1.143814948                   | 425434126.3                        | 559.6063065                    |
| 13471346.1                    | 45.36563696                                        | 2.225349724                   | 363726344.7                        | 460.0849741                    |
| 18442844.48                   | 49.37028752                                        | 0.388762823                   | 497956800.9                        | 476.7939866                    |
| 6460521.898                   | 37.61856302                                        | 0.053657602                   | 174434091.2                        | 309.1356054                    |
| 12216015.42                   | 38.31439334                                        | -0.390042301                  | 329832416.3                        | 386.2432926                    |
| 10593929.78                   | 46.74740294                                        | 1.009991344                   | 286036104                          | 372.7092561                    |
| 24220240.39                   | 53.16517861                                        | -0.375214584                  | 653946490.5                        | 506.1258276                    |
| 22061174.54                   | 48.8222513                                         | -0.224193433                  | 595651712.5                        | 476.7296096                    |
| 38471926.33                   | 42.05046826                                        | 0.022304096                   | 1038742011                         | 629.3652819                    |
| 7999181.686                   | 50.60048768                                        | 3.502332603                   | 215977905.5                        | 421.8290227                    |
| 659977.4321                   | 31.07417023                                        | 3.502712798                   | 17819390.67                        | 224.0680358                    |
| 7524073.264                   | 62.15761157                                        | -0.236382268                  | 203149978.1                        | 391.8667317                    |
| 25679559.87                   | 35.70035293                                        | 0.949986995                   | 693348116.5                        | 420.1808732                    |
| 11251049.13                   | 49.42162257                                        | 2.17810349                    | 303778326.5                        | 569.7028117                    |
| 87566899.97                   | 66.70948991                                        | -0.0234769                    | 2364306299                         | 597.9972709                    |
| 10109483.95                   | 58.16180313                                        | 6.600140636                   | 272956066.5                        | 441.6105474                    |
| 47541412.74                   | 24.2692227                                         | -0.224413623                  | 1283618144                         | 581.2355065                    |
| 13076227.5                    | 56.35072909                                        | 0.889012476                   | 353058142.4                        | 548.9054708                    |
| 17911377.83                   | 40.74427569                                        | 1.344158138                   | 483607201.4                        | 416.2546594                    |
| 33390911.16                   | 53.03270949                                        | -5.80586235                   | 901554601.3                        | 698.6431622                    |
| 5150848.697                   | 29.98070166                                        | -0.291272402                  | 139072914.8                        | 533.8382148                    |
| 2334688.961                   | 24.3759731                                         | -1.194861214                  | 63036601.96                        | 330.0595896                    |
| 10372097.81                   | 32.44481735                                        | -0.284855121                  | 280046641                          | 465.9784267                    |
| 90822501.73                   | 50.77634503                                        | 2.087405984                   | 2452207547                         | 680.09521                      |
| 27596562.87                   | 37.8968388                                         | 0.728705096                   | 745107197.5                        | 440.1852144                    |
| 10654073.11                   | 19.39211535                                        | 0.169906468                   | 287659974                          | 384.3934901                    |
| 1128207.304                   | 34.64345191                                        | -2.368372765                  | 30461597.21                        | 211.1043387                    |
| 8697999.24                    | 29.8426557                                         | 0.134149928                   | 234845979.5                        | 412.5573326                    |
| 5858536.213                   | 63.39714237                                        | 4.450178377                   | 158180477.7                        | 423.4649035                    |
| 27274836.01                   | 37.56328287                                        | 1.209931991                   | 736420572.4                        | 410.4760055                    |
| 4133880.869                   | 49.45452818                                        | 2.608099013                   | 111614783.5                        | 273.7905257                    |
| 37739906.12                   | 60.20837789                                        | 4.254241667                   | 1018977465                         | 613.1875249                    |
| 25807671                      | 37.48967523                                        | -0.593747035                  | 696807117                          | 475.1603194                    |
| 10671025.81                   | 39.67014226                                        | -0.684166637                  | 288117696.7                        | 552.6654463                    |
| 11125274.24                   | 18.62995049                                        | -0.113619875                  | 300382404.4                        | 217.2977596                    |
| 19130761.92                   | 20.04249525                                        | -0.436219466                  | 516530571.7                        | 407.2518909                    |
| 100636039                     | 35.32860435                                        | 0.42055456                    | 2717173052                         | 706.0661178                    |
| 18840977.36                   | 61.63574643                                        | 4.020444961                   | 508706388.6                        | 611.2191747                    |
| 16238921.84                   | 60.92456623                                        | 0.893241742                   | 438450889.8                        | 472.2199227                    |
| 7268799.598                   | 54.61532371                                        | 3.160412447                   | 196257589.1                        | 407.2139911                    |
| 15807919.47                   | 41.22649526                                        | 0.967602857                   | 426813825.7                        | 381.9924834                    |
| 72266909.28                   | 62.75310776                                        | 1.29589183                    | 1951206551                         | 567.2871181                    |
| 2804791.361                   | 33.55859008                                        | 1.301181876                   | 75729366.76                        | 242.7955997                    |
| 19635002.14                   | 58.03201134                                        | -2.700799618                  | 530145057.8                        | 480.5527041                    |
| 64210343.35                   | 67.06445044                                        | 4.650774766                   | 1733679270                         | 807.934728                     |
| 349866.8633                   | 24.58774988                                        | -2.127532746                  | 9446405.31                         | 121.9570473                    |
| 15110920.59                   | 31.91949732                                        | 0.483290862                   | 407994856                          | 288.9166977                    |
| 52335207.11                   | 45.05628851                                        | -1.671785648                  | 1413050592                         | 550.9964435                    |
| 4137672.644                   | 36.15297948                                        | -0.488590316                  | 111717161.4                        | 390.6567167                    |
| 52509168.71                   | 84.6109841                                         | -0.108454421                  | 1417747555                         | 614.8814207                    |
| 3436353.851                   | 46.17590585                                        | 4.430908252                   | 92781553.99                        | 617.8115353                    |
| 610752.5229                   | 34.39017637                                        | -1.896054066                  | 16490318.12                        | 178.8394048                    |
| 39005808.79                   | 36.31958577                                        | 1.911791649                   | 1053156837                         | 609.7146124                    |
| 21997212.51                   | 82.37314986                                        | 2.841598666                   | 593924737.8                        | 620.0078756                    |
| 22753298.76                   | 73.50732912                                        | -0.688716159                  | 614339066.5                        | 530.3167226                    |
| 54490761.19                   | 37.0578659                                         | 1.347163645                   | 1471250552                         | 798.6732347                    |
| 57790198.83                   | 33.49273163                                        | 0.206875639                   | 1560335368                         | 764.834968                     |
| 2465648.404                   | 54.42830278                                        | 2.611742726                   | 66572506.92                        | 246.8557253                    |
| 22301269.96                   | 57.21146217                                        | 0.880891915                   | 602134288.9                        | 596.3681954                    |
| 538711.76                     | 32.72186713                                        | 4.934510832                   | 14545217.52                        | 191.6547164                    |
| 2360697.303                   | 33.81286494                                        | 1.886787312                   | 63738827.17                        | 275.3991584                    |
| 4353129.124                   | 28.17276998                                        | -0.949586871                  | 117534486.3                        | 316.2688753                    |

| wavelet.HHH_firstorder_RootMeanSquared | wavelet.HHH_firstorder_90Percentile | wavelet.HHH_firstorder_Minimum | wavelet.HHH_firstorder_Entropy | wavelet.HHH_firstorder_StandardDeviation | wavelet.HHH_firstorder_Range |
|----------------------------------------|-------------------------------------|--------------------------------|--------------------------------|------------------------------------------|------------------------------|
| 106.0492704                            | 118.9648793                         | -510.0736102                   | 3.950776377                    | 106.0492575                              | 1085.060503                  |
| 99.11564471                            | 102.6136905                         | -405.3925573                   | 3.831321348                    | 99.11196559                              | 931.5906148                  |
| 144.3433695                            | 153.890051                          | -498.3557924                   | 4.457721942                    | 144.2403778                              | 1057.425111                  |
| 101.2248273                            | 121.2271058                         | -419.1609045                   | 4.017576741                    | 101.2246154                              | 867.9488547                  |
| 76.41860267                            | 104.0472081                         | -198.267999                    | 3.644832908                    | 76.33853791                              | 404.2928217                  |
| 90.49787838                            | 102.2476436                         | -353.7322976                   | 3.830575268                    | 90.48915692                              | 671.525379                   |
| 141.9489696                            | 167.2084099                         | -610.5686815                   | 4.417750389                    | 141.8850567                              | 961.7921747                  |
| 121.5000988                            | 155.9347032                         | -446.3962128                   | 4.300348989                    | 121.499949                               | 845.7265748                  |
| 82.88543613                            | 93.3967478                          | -461.7342029                   | 3.675232944                    | 82.88528634                              | 1220.527012                  |
| 104.6818719                            | 122.034578                          | -496.4140231                   | 4.036406569                    | 104.6774493                              | 1007.014196                  |
| 132.7630775                            | 166.6317317                         | -633.6751437                   | 4.356190199                    | 132.694504                               | 1211.704359                  |
| 175.9109557                            | 186.849194                          | -754.9114352                   | 4.654109322                    | 175.9103548                              | 1610.178506                  |
| 101.8486354                            | 110.4361254                         | -742.1459229                   | 3.949317938                    | 101.8473634                              | 1301.986606                  |
| 124.6728661                            | 127.5104999                         | -719.1913395                   | 4.169577768                    | 124.6672762                              | 1437.2289                    |
| 61.89266441                            | 74.35826307                         | -229.6015858                   | 3.326981182                    | 61.88987831                              | 471.609343                   |
| 46.73243161                            | 46.95170737                         | -339.5791656                   | 2.680397976                    | 46.73216483                              | 601.5100742                  |
| 66.18657127                            | 72.90791333                         | -335.2279048                   | 3.376208466                    | 66.18516494                              | 647.0665478                  |
| 105.8214932                            | 103.5324367                         | -516.1204642                   | 3.906356313                    | 105.7916603                              | 1103.306605                  |
| 97.858533                              | 122.2551358                         | -416.0185823                   | 3.947720744                    | 97.85633454                              | 738.9008218                  |
| 87.53441755                            | 101.8755993                         | -418.3800294                   | 3.718639476                    | 87.53392992                              | 834.3171189                  |
| 63.45244323                            | 76.38597116                         | -332.4017823                   | 3.320158587                    | 63.45240265                              | 693.2356436                  |
| 123.57507                              | 149.1949265                         | -552.012796                    | 4.304842718                    | 123.5674256                              | 1162.314392                  |
| 36.33648873                            | 43.2358247                          | -149.0960845                   | 2.573937333                    | 36.33589536                              | 308.1205973                  |
| 126.680845                             | 148.9329973                         | -458.2500627                   | 4.317810698                    | 126.6547475                              | 861.7574357                  |
| 123.5821287                            | 143.2731786                         | -473.0069006                   | 4.245649228                    | 123.5443978                              | 1091.643902                  |
| 104.1680125                            | 125.9063149                         | -368.8668884                   | 4.041467866                    | 104.1680044                              | 744.3810362                  |
| 130.7689129                            | 146.2489651                         | -940.7880767                   | 4.303515849                    | 130.7678939                              | 1608.95297                   |
| 150.0718999                            | 182.0155561                         | -565.8266832                   | 4.440916059                    | 150.0412906                              | 1132.405555                  |
| 208.2381356                            | 271.5852052                         | -783.3430273                   | 4.848956439                    | 208.0713802                              | 1407.831231                  |
| 81.71193987                            | 88.0198001                          | -522.2396458                   | 3.528357422                    | 81.7110016                               | 1039.777015                  |
| 135.4035143                            | 161.8770265                         | -704.1533073                   | 4.340572813                    | 135.4035141                              | 1243.227326                  |
| 68.80533234                            | 74.42964504                         | -422.78466                     | 3.373455649                    | 68.80437018                              | 738.4081506                  |
| 153.0418691                            | 151.7581919                         | -1337.15155                    | 4.338485078                    | 153.0360236                              | 2382.404757                  |
| 139.3099485                            | 136.8064579                         | -404.4517911                   | 4.21866191                     | 138.5894609                              | 861.3266678                  |
| 185.5898952                            | 235.8128555                         | -519.1543284                   | 4.773985307                    | 185.5325275                              | 1109.470969                  |
| 81.7942925                             | 99.98436412                         | -419.7618456                   | 3.670908823                    | 81.79418448                              | 810.8350121                  |
| 143.2450798                            | 161.4347558                         | -753.724598                    | 4.382836891                    | 143.2419563                              | 1509.038068                  |
| 106.6482777                            | 119.3923977                         | -757.3128206                   | 3.983282909                    | 106.6478342                              | 1332.809681                  |
| 137.3697292                            | 169.4819876                         | -439.214116                    | 4.384814496                    | 136.9162638                              | 998.8204225                  |
| 113.3229191                            | 123.094151                          | -543.7353653                   | 4.065841019                    | 113.3216782                              | 1003.820339                  |
| 111.8575262                            | 119.6616889                         | -614.6733493                   | 4.10183691                     | 111.834642                               | 1091.467336                  |
| 82.33554245                            | 90.40834335                         | -387.4284919                   | 3.677849229                    | 82.3059582                               | 696.5640973                  |
| 86.25379448                            | 99.51940065                         | -489.5494768                   | 3.755189361                    | 86.25378137                              | 875.7927694                  |
| 101.663864                             | 128.3165877                         | -471.0614467                   | 3.992332142                    | 101.5950533                              | 843.7707028                  |
| 113.564196                             | 129.5706502                         | -488.623418                    | 4.166923272                    | 113.5638613                              | 994.7492456                  |
| 99.50770776                            | 124.200308                          | -419.0610393                   | 4.003336756                    | 99.50025021                              | 895.7906489                  |
| 94.96455569                            | 107.2704118                         | -662.1643792                   | 3.884391161                    | 94.96449949                              | 1291.529661                  |
| 117.1354912                            | 137.2392028                         | -440.8895491                   | 4.148052774                    | 117.0925973                              | 862.7185718                  |
| 70.17980277                            | 79.6245948                          | -200.8875543                   | 3.4068958                      | 70.17980275                              | 424.9565902                  |
| 123.0405641                            | 158.6419208                         | -439.4896046                   | 4.267664778                    | 122.8743374                              | 831.3563363                  |
| 86.60179824                            | 98.70710444                         | -470.0313972                   | 3.732109057                    | 86.60161459                              | 890.2122704                  |
| 116.6389915                            | 126.6950036                         | -511.5499947                   | 4.114984381                    | 116.6335538                              | 1081.252806                  |
| 151.3845202                            | 176.7922888                         | -779.3789229                   | 4.552352738                    | 151.3788857                              | 1377.376194                  |
| 130.7888596                            | 166.2146394                         | -508.3424502                   | 4.32459377                     | 130.6564758                              | 949.9529976                  |
| 85.37138994                            | 80.42113135                         | -527.4119425                   | 3.433464094                    | 85.36833415                              | 1108.647449                  |
| 121.968251                             | 143.8574789                         | -471.6935739                   | 4.256539621                    | 121.9552181                              | 1020.599045                  |
| 90.37434896                            | 106.633206                          | -497.4414276                   | 3.818803559                    | 90.37388822                              | 913.696087                   |
| 160.6996284                            | 132.5059437                         | -676.8871005                   | 4.336270967                    | 160.6993018                              | 1375.530263                  |
| 79.54762065                            | 84.62053641                         | -468.7015986                   | 3.496508074                    | 79.54713587                              | 1002.539813                  |
| 51.47858024                            | 58.74801675                         | -307.6573556                   | 3.004809901                    | 51.47667998                              | 637.7169451                  |
| 69.96290332                            | 79.63217698                         | -407.0759831                   | 3.458374172                    | 69.96280076                              | 873.0544099                  |
| 128.7614078                            | 145.3012234                         | -736.0532695                   | 4.256148367                    | 128.7487552                              | 1416.14848                   |
| 94.50357927                            | 108.7827716                         | -555.6686789                   | 3.825191692                    | 94.50257885                              | 995.8538933                  |
| 62.45928183                            | 60.01997723                         | -783.5733262                   | 3.057972457                    | 62.45574542                              | 1167.966816                  |
| 72.10486808                            | 80.72536078                         | -221.4768223                   | 3.507790674                    | 72.07752793                              | 432.581161                   |
| 74.83830709                            | 87.93365463                         | -349.6730413                   | 3.489266322                    | 74.8372517                               | 762.2303739                  |
| 121.9400724                            | 151.5723335                         | -422.6339442                   | 4.246712717                    | 121.9132956                              | 846.0988477                  |
| 92.3654937                             | 106.4954723                         | -460.5827972                   | 3.805051749                    | 92.36541601                              | 871.0588027                  |
| 96.27456147                            | 121.3784978                         | -397.0044838                   | 3.94269118                     | 96.27356507                              | 670.7950095                  |
| 136.991737                             | 158.3309692                         | -749.5721473                   | 4.39715357                     | 136.9514831                              | 1362.759672                  |
| 92.13775264                            | 104.356111                          | -433.7430605                   | 3.808197962                    | 92.13774301                              | 908.9033799                  |
| 97.22011134                            | 113.2841383                         | -473.8299946                   | 3.841543857                    | 97.19913741                              | 1026.495441                  |
| 46.39744975                            | 52.86557571                         | -236.118628                    | 2.855718139                    | 46.39731245                              | 453.4163876                  |
| 53.37166971                            | 59.38286553                         | -316.7301523                   | 2.991244407                    | 53.37166838                              | 723.9820432                  |
| 104.7021083                            | 111.845735                          | -823.0345703                   | 3.840842889                    | 104.6748757                              | 1529.100688                  |
| 129.9330451                            | 153.7480799                         | -524.5284363                   | 4.350356017                    | 129.9318132                              | 1135.747611                  |
| 120.5735393                            | 154.4452733                         | -408.4945535                   | 4.272844752                    | 120.5534638                              | 880.7144763                  |
| 109.1607297                            | 120.9207945                         | -329.9012793                   | 4.130501304                    | 109.1607297                              | 737.1152704                  |
| 94.66470089                            | 103.7863165                         | -516.6035052                   | 3.857550567                    | 94.66403868                              | 898.5959886                  |
| 159.3500825                            | 161.2225348                         | -634.1326063                   | 4.546964013                    | 159.2912492                              | 1201.419724                  |
| 74.59934467                            | 85.72720469                         | -431.8296164                   | 3.507932115                    | 74.59006921                              | 674.625216                   |
| 121.0043791                            | 145.0718728                         | -545.0401593                   | 4.259145583                    | 121.0023615                              | 1025.592863                  |
| 151.6508291                            | 181.0929317                         | -593.470452                    | 4.549001314                    | 151.4386746                              | 1401.40518                   |
| 49.12102319                            | 58.15809621                         | -190.8757679                   | 2.879311858                    | 49.12098452                              | 312.8328152                  |
| 66.7546567                             | 82.25952186                         | -319.0807027                   | 3.434905703                    | 66.75442304                              | 607.9974003                  |
| 97.76091412                            | 115.749721                          | -491.4421114                   | 3.956121315                    | 97.75775669                              | 1042.438555                  |
| 72.92698609                            | 88.69385458                         | -283.8135428                   | 3.554488434                    | 72.92383111                              | 674.4702595                  |
| 183.9381072                            | 225.3034707                         | -778.8336896                   | 4.848822534                    | 183.936355                               | 1393.71511                   |
| 137.032441                             | 176.8855228                         | -706.6089166                   | 3.998945077                    | 137.0132642                              | 1324.420452                  |
| 76.26723212                            | 96.61795982                         | -226.4047966                   | 3.555155918                    | 76.22614308                              | 405.2442014                  |
| 99.05948761                            | 108.429605                          | -780.6561295                   | 3.827124965                    | 99.05632888                              | 1390.370742                  |
| 176.5149422                            | 207.243018                          | -622.2786588                   | 4.756062156                    | 176.5146655                              | 1242.286534                  |
| 149.2095899                            | 196.9364451                         | -647.169894                    | 4.557734002                    | 149.0213658                              | 1177.486617                  |
| 115.4249734                            | 118.7602579                         | -711.1974214                   | 3.935964625                    | 115.4247522                              | 1509.870656                  |
| 99.76738259                            | 99.71134282                         | -851.0752819                   | 3.767256991                    | 99.76535694                              | 1615.91025                   |
| 98.72003782                            | 122.5357311                         | -253.7556209                   | 3.974183477                    | 98.72000603                              | 500.6113462                  |
| 135.4247399                            | 143.7059065                         | -692.4020271                   | 4.342458619                    | 135.4166982                              | 1288.770222                  |
| 66.17983384                            | 75.7249323                          | -205.0002857                   | 3.290413543                    | 66.17784656                              | 396.6550022                  |
| 78.92244787                            | 89.22374591                         | -330.8630593                   | 3.556782422                    | 78.92154612                              | 606.2622177                  |
| 73.44529971                            | 84.46650751                         | -412.2413801                   | 3.451116602                    | 73.43936341                              | 728.5102554                  |

| wavelet.HHH_firstorder_Variance | wavelet.HHH_firstorder_10Percentile | wavelet.HHH_firstorder_Kurtosis | wavelet.HHH_firstorder_Mean | wavelet.HHH_glrIm_ShortRunLowGrayLevelEmphasis | wavelet.HHH_glrIm_GrayLevelVariance |
|---------------------------------|-------------------------------------|---------------------------------|-----------------------------|------------------------------------------------|-------------------------------------|
| 11246.44503                     | -112.7224406                        | 7.1708874                       | -0.052293846                | 0.004486599                                    | 19.14416616                         |
| 9823.181723                     | -111.162799                         | 6.282749995                     | -0.952738995                | 0.006169163                                    | 17.38799175                         |
| 20805.28658                     | -191.9893343                        | 4.038635582                     | -5.451765742                | 0.005848676                                    | 34.01433403                         |
| 10246.42277                     | -121.0476661                        | 4.182932357                     | 0.207089882                 | 0.004555841                                    | 17.41937372                         |
| 5827.572371                     | -94.74152701                        | 2.81666346                      | 3.497207848                 | 0.036267069                                    | 9.878610402                         |
| 8188.28752                      | -109.230423                         | 4.413073687                     | -1.25637246                 | 0.007368417                                    | 13.84418083                         |
| 20131.3693                      | -182.5350073                        | 4.234629692                     | -4.259185214                | 0.00502936                                     | 32.96472065                         |
| 14762.2376                      | -158.8286865                        | 3.45301177                      | 0.190794099                 | 0.005083543                                    | 24.43389631                         |
| 6869.970691                     | -95.9431796                         | 8.618419395                     | 0.157580302                 | 0.003445107                                    | 11.70473117                         |
| 10957.36839                     | -120.9762283                        | 5.158424405                     | 0.962247309                 | 0.003245338                                    | 18.44353066                         |
| 17607.83138                     | -150.4504715                        | 5.39494722                      | 4.266540862                 | 0.003399125                                    | 29.09465462                         |
| 30944.45293                     | -206.034429                         | 6.20718237                      | 0.459793471                 | 0.002260374                                    | 52.11559146                         |
| 10372.88544                     | -112.6899225                        | 7.883145219                     | -0.509014941                | 0.00166333                                     | 17.57134647                         |
| 15541.92975                     | -130.0548048                        | 8.466282847                     | -1.18059087                 | 0.00249317                                     | 26.36751656                         |
| 3830.357038                     | -74.80994193                        | 3.877329908                     | -0.587256498                | 0.012615797                                    | 6.557607819                         |
| 2183.89523                      | -45.14474204                        | 9.60409496                      | 0.15790472                  | 0.00475656                                     | 4.250740401                         |
| 4380.476058                     | -78.87053605                        | 5.557873543                     | -0.431461014                | 0.006705828                                    | 7.510915202                         |
| 11191.8754                      | -117.2981281                        | 7.312436903                     | -2.512574939                | 0.003235036                                    | 19.57620229                         |
| 9575.86221                      | -121.0506684                        | 3.872439622                     | -0.655950819                | 0.005659837                                    | 15.85478023                         |
| 7662.188888                     | -99.91951524                        | 5.345235385                     | 0.292177122                 | 0.004129286                                    | 13.41251427                         |
| 4026.207401                     | -77.19380928                        | 4.848394345                     | -0.071763944                | 0.005258284                                    | 7.242153386                         |
| 15268.90866                     | -148.5216643                        | 4.575450113                     | 1.374506888                 | 0.002734889                                    | 25.43660015                         |
| 1320.297292                     | -44.48714087                        | 4.354013869                     | 0.207656949                 | 0.028606949                                    | 2.443205117                         |
| 16041.42506                     | -140.8002138                        | 3.974686747                     | 2.571267689                 | 0.005829585                                    | 26.62704707                         |
| 15263.21823                     | -154.3051902                        | 5.017600469                     | -3.053572287                | 0.005041727                                    | 25.7566702                          |
| 10850.97314                     | -137.926597                         | 3.967291072                     | -0.04101715                 | 0.009818995                                    | 18.34073883                         |
| 17100.24206                     | -143.5141545                        | 7.756557025                     | -0.516244215                | 0.001091434                                    | 28.71367979                         |
| 22512.38887                     | -156.4484639                        | 4.531387681                     | 3.03088638                  | 0.003281219                                    | 37.06725384                         |
| 43293.69928                     | -249.9502042                        | 4.179718751                     | 8.331976593                 | 0.001916071                                    | 71.25392832                         |
| 6676.687782                     | -91.59210876                        | 7.383016643                     | -0.391579436                | 0.00263526                                     | 12.08514796                         |
| 18334.11163                     | -154.7314095                        | 5.017522491                     | -0.007111791                | 0.001655046                                    | 30.71440082                         |
| 4734.041356                     | -78.8938506                         | 5.696708131                     | -0.363870497                | 0.003513186                                    | 8.33882383                          |
| 23420.0245                      | -158.1185537                        | 15.47701079                     | -1.33760344                 | 0.000882601                                    | 39.86455917                         |
| 19207.03867                     | -180.1988763                        | 4.652293738                     | -14.15002051                | 0.01724428                                     | 32.00712956                         |
| 34422.21857                     | -211.2120955                        | 4.120464108                     | 4.625001986                 | 0.009244003                                    | 56.14657932                         |
| 6690.288615                     | -97.99983919                        | 5.073671684                     | -0.132932364                | 0.00419265                                     | 11.47515382                         |
| 20518.25803                     | -179.9437086                        | 5.840713761                     | 0.94597078                  | 0.001536184                                    | 34.74796275                         |
| 11373.76054                     | -122.3428492                        | 7.208701194                     | 0.30758135                  | 0.001358984                                    | 39.54230392                         |
| 18746.06328                     | -137.2245567                        | 4.482011991                     | 11.15254327                 | 0.005613256                                    | 30.91840267                         |
| 12841.80275                     | -131.1399889                        | 5.895765711                     | -0.5303102                  | 0.004570017                                    | 21.84321528                         |
| 12506.98714                     | -137.0016986                        | 5.822670625                     | -2.262523972                | 0.003134073                                    | 21.2396724                          |
| 6774.271023                     | -93.9211721                         | 5.249036882                     | -2.206927206                | 0.006742016                                    | 11.61072163                         |
| 7439.7148                       | -98.62709703                        | 5.435362388                     | -0.04756237                 | 0.00323848                                     | 12.74187327                         |
| 10321.55486                     | -114.4996522                        | 4.874579569                     | 3.7983746                   | 0.004269117                                    | 17.4026229                          |
| 12896.75059                     | -132.8145668                        | 4.759776923                     | -0.275737714                | 0.003695381                                    | 21.52124002                         |
| 9900.299791                     | -116.1934353                        | 4.381125467                     | 1.218241484                 | 0.004930869                                    | 16.51842663                         |
| 9018.256163                     | -105.8794659                        | 6.761925179                     | 0.103321357                 | 0.006614878                                    | 15.40806221                         |
| 13710.67634                     | -133.5307204                        | 4.629127695                     | 3.169693981                 | 0.005965515                                    | 23.11926129                         |
| 4925.204715                     | -96.92285522                        | 4.011562391                     | -0.001494572                | 0.025177317                                    | 8.416360613                         |
| 15098.10279                     | -136.3014036                        | 4.017855161                     | 6.393561021                 | 0.010019873                                    | 25.1455078                          |
| 7499.839649                     | -102.3329297                        | 5.482455871                     | -0.178349747                | 0.003221705                                    | 13.06229341                         |
| 13603.38587                     | -126.9490235                        | 6.409295638                     | 1.126257138                 | 0.004074708                                    | 22.9883283                          |
| 22915.56704                     | -169.3591613                        | 5.364034182                     | -1.306107036                | 0.001435869                                    | 38.03487377                         |
| 17071.11467                     | -141.6236393                        | 4.662707129                     | 5.883122059                 | 0.004868232                                    | 28.48425672                         |
| 7287.752476                     | -82.6234143                         | 9.470663795                     | -0.722318836                | 0.002263867                                    | 13.05187848                         |
| 14873.07523                     | -140.3157508                        | 4.858047497                     | 1.782983678                 | 0.004963781                                    | 24.87716335                         |
| 8167.439673                     | -99.72229917                        | 5.444233668                     | 0.288579247                 | 0.003089906                                    | 13.84091629                         |
| 25824.26559                     | -144.089955                         | 8.383613199                     | -0.324027961                | 0.002482672                                    | 43.43226276                         |
| 6327.746824                     | -80.1421181                         | 8.941188346                     | 0.277717438                 | 0.004805021                                    | 11.2130368                          |
| 2649.848582                     | -58.40619678                        | 6.775777488                     | 4.423131992                 | 0.006671957                                    | 4.623409174                         |
| 4894.793491                     | -83.17405446                        | 6.51599531                      | -0.119792052                | 0.00413292                                     | 8.534055894                         |
| 16576.24196                     | -143.3356019                        | 6.319218076                     | 1.805040493                 | 0.001500592                                    | 28.25255323                         |
| 8930.73741                      | -109.499798                         | 5.763764683                     | -0.43483936                 | 0.002319273                                    | 15.42468319                         |
| 3900.720136                     | -60.84513228                        | 18.06861131                     | -0.664642882                | 0.001290469                                    | 7.320299564                         |
| 5195.170032                     | -94.60844554                        | 3.787565361                     | -1.985439027                | 0.02446704                                     | 8.642362015                         |
| 5600.614242                     | -84.54804019                        | 5.741479404                     | 0.397450393                 | 0.006846101                                    | 9.802193391                         |
| 14862.85164                     | -146.5297627                        | 3.642463598                     | -2.555310339                | 0.007523278                                    | 24.35046832                         |
| 8531.370075                     | -110.0319612                        | 5.429660858                     | -0.119801472                | 0.003745881                                    | 14.71740593                         |
| 9268.599331                     | -124.4996809                        | 3.879846839                     | 0.438011612                 | 0.007028192                                    | 15.39984731                         |
| 18755.70873                     | -149.9922553                        | 5.678381242                     | 3.320735607                 | 0.001706914                                    | 31.22969222                         |
| 8489.363687                     | -102.4423934                        | 5.496355005                     | 0.042112234                 | 0.003824128                                    | 14.72507848                         |
| 9447.672313                     | -105.2345148                        | 7.166679916                     | 2.019340543                 | 0.004759557                                    | 36.30495844                         |
| 2152.710603                     | -54.18515666                        | 5.503243438                     | 0.112873913                 | 0.009917798                                    | 3.999566733                         |
| 2848.534986                     | -57.98518312                        | 7.431787307                     | 0.011887505                 | 0.005719239                                    | 5.270391601                         |
| 10956.8296                      | -98.3877324                         | 9.718107078                     | 2.387861247                 | 0.001043912                                    | 19.1182453                          |
| 16882.27609                     | -158.509678                         | 4.685895234                     | -0.565777306                | 0.004914605                                    | 27.98654802                         |
| 14533.13762                     | -147.3154759                        | 3.770554872                     | 2.200170564                 | 0.006224366                                    | 23.96838125                         |
| 11916.06491                     | -137.2713732                        | 3.734029084                     | 0.001007034                 | 0.011194172                                    | 19.75378099                         |
| 8961.28022                      | -103.047586                         | 5.822944044                     | -0.354083816                | 0.003465631                                    | 15.20439914                         |
| 25373.70207                     | -202.626988                         | 4.56952204                      | -4.329749552                | 0.00223421                                     | 42.52994815                         |
| 5563.678425                     | -81.15226125                        | 6.294996056                     | 1.176350369                 | 0.005168563                                    | 9.607934237                         |
| 14641.5715                      | -140.5632413                        | 4.253588703                     | -0.698758421                | 0.003148609                                    | 24.30529764                         |
| 22933.67216                     | -158.2190026                        | 5.31514983                      | 8.018841783                 | 0.002944612                                    | 37.8472468                          |
| 2412.871121                     | -57.72857352                        | 4.845243375                     | -0.061636406                | 0.028943326                                    | 4.152532192                         |
| 4456.152995                     | -80.21644545                        | 4.265257004                     | 0.176622524                 | 0.006508252                                    | 7.672827006                         |
| 9556.578993                     | -114.2567397                        | 4.865817528                     | -0.785708419                | 0.002870475                                    | 16.12216134                         |
| 5317.885144                     | -85.28405213                        | 4.739765235                     | 0.678348232                 | 0.010233453                                    | 9.204391856                         |
| 3832.58268                      | -227.5388231                        | 3.978910283                     | -0.802861543                | 0.002003397                                    | 55.82385438                         |
| 18772.63457                     | -115.2396265                        | 10.05313357                     | 2.292449481                 | 0.007076835                                    | 32.11047256                         |
| 5810.424888                     | -88.65791665                        | 3.949071176                     | -2.503159262                | 0.02664987                                     | 9.875708836                         |
| 9812.156292                     | -106.6021892                        | 7.929845455                     | 0.791070871                 | 0.001225311                                    | 17.1120358                          |
| 31157.42714                     | -218.2981939                        | 4.198156726                     | 0.312506155                 | 0.005429795                                    | 51.39569457                         |
| 22207.36748                     | -165.6542712                        | 3.970853102                     | 7.492278894                 | 0.002693927                                    | 36.59762969                         |
| 13322.87342                     | -118.2365639                        | 8.967290642                     | 0.226001045                 | 0.001544753                                    | 23.52775431                         |
| 9953.126446                     | -101.4098944                        | 10.76147115                     | -0.635754117                | 0.000978543                                    | 17.51937527                         |
| 9745.639591                     | -118.4625                           | 2.739862103                     | 0.079224792                 | 0.017641499                                    | 15.95683626                         |
| 18337.68215                     | -150.0912303                        | 6.255895185                     | -1.475808591                | 0.002290782                                    | 30.59691814                         |
| 4379.507375                     | -80.4243556                         | 3.637875712                     | 0.512865841                 | 0.022573518                                    | 7.455683661                         |
| 6228.610442                     | -86.4540471                         | 5.760293394                     | -0.377272895                | 0.009782105                                    | 10.62638226                         |
| 5393.340098                     | -84.04234702                        | 6.629598686                     | 0.933783201                 | 0.004805688                                    | 9.812226814                         |

| wavelet.HHH_glrIm_LowGrayLevelRunEmphasis | wavelet.HHH_glrIm_GrayLevelNonUniformityNormalized | wavelet.HHH_glrIm_RunVariance | wavelet.HHH_glrIm_GrayLevelNonUniformity | wavelet.HHH_glrIm_LongRunEmphasis |
|-------------------------------------------|----------------------------------------------------|-------------------------------|------------------------------------------|-----------------------------------|
| 0.004609366                               | 0.081963881                                        | 0.089913811                   | 53.60852483                              | 1.25595325                        |
| 0.006490356                               | 0.091766889                                        | 0.167908853                   | 169.5880865                              | 1.433986661                       |
| 0.005935511                               | 0.055715353                                        | 0.040333482                   | 23.29467463                              | 1.118453163                       |
| 0.004738078                               | 0.075955033                                        | 0.09179825                    | 185.8754588                              | 1.251515913                       |
| 0.037509668                               | 0.090156714                                        | 0.082749062                   | 30.0624128                               | 1.242941567                       |
| 0.007622305                               | 0.086104471                                        | 0.088355045                   | 51.27064861                              | 1.255666385                       |
| 0.005085466                               | 0.055498213                                        | 0.046946554                   | 17.91315426                              | 1.137688739                       |
| 0.005203829                               | 0.06083114                                         | 0.054720933                   | 58.00630313                              | 1.159560463                       |
| 0.003613317                               | 0.09648581                                         | 0.100044477                   | 184.0296364                              | 1.288505651                       |
| 0.003571959                               | 0.076243879                                        | 0.081967743                   | 220.0646421                              | 1.234698616                       |
| 0.0034747                                 | 0.059500435                                        | 0.057482301                   | 46.704394                                | 1.168399044                       |
| 0.002305656                               | 0.053447082                                        | 0.071875406                   | 74.49068014                              | 1.203476711                       |
| 0.001722626                               | 0.081115387                                        | 0.092231693                   | 155.9490607                              | 1.257188033                       |
| 0.002557081                               | 0.071324751                                        | 0.099434187                   | 73.78175441                              | 1.269191085                       |
| 0.013329052                               | 0.117721944                                        | 0.115918596                   | 97.15268823                              | 1.33541387                        |
| 0.005434294                               | 0.20215475                                         | 0.317030256                   | 1142.581347                              | 1.83232487                        |
| 0.007058828                               | 0.114400709                                        | 0.115600358                   | 72.29624385                              | 1.336911913                       |
| 0.003399568                               | 0.089222931                                        | 0.137600267                   | 187.8199188                              | 1.367869997                       |
| 0.005822545                               | 0.076904441                                        | 0.073771912                   | 41.96901569                              | 1.212783258                       |
| 0.004396223                               | 0.09751404                                         | 0.163502734                   | 244.0065273                              | 1.423571261                       |
| 0.005705789                               | 0.12184475                                         | 0.189588339                   | 556.6825588                              | 1.497845086                       |
| 0.002812814                               | 0.062057954                                        | 0.061666141                   | 100.9955053                              | 1.179436678                       |
| 0.031912482                               | 0.19611213                                         | 0.241028879                   | 450.1435253                              | 1.660061434                       |
| 0.005942419                               | 0.060261828                                        | 0.055742226                   | 27.49474344                              | 1.168051641                       |
| 0.005185184                               | 0.065865717                                        | 0.095169619                   | 73.77556138                              | 1.252854956                       |
| 0.010144398                               | 0.072695057                                        | 0.098119859                   | 46.76588548                              | 1.267352192                       |
| 0.001124754                               | 0.065015521                                        | 0.077762638                   | 210.8692573                              | 1.22080907                        |
| 0.003375648                               | 0.061119919                                        | 0.066192068                   | 82.54466661                              | 1.193756802                       |
| 0.001964798                               | 0.047474833                                        | 0.073009807                   | 78.99703435                              | 1.203853504                       |
| 0.00284238                                | 0.113106012                                        | 0.197963581                   | 250.5582123                              | 1.517804164                       |
| 0.001711585                               | 0.065144769                                        | 0.074516179                   | 194.1520787                              | 1.213336223                       |
| 0.003823497                               | 0.123469552                                        | 0.165893079                   | 646.8333541                              | 1.45231989                        |
| 0.000900239                               | 0.066050516                                        | 0.089614847                   | 125.0483523                              | 1.243713289                       |
| 0.01780997                                | 0.065315074                                        | 0.036175348                   | 6.558100749                              | 1.110611875                       |
| 0.009364775                               | 0.044991175                                        | 0.039410355                   | 14.42827142                              | 1.112587238                       |
| 0.004424806                               | 0.097731863                                        | 0.121401432                   | 179.2194402                              | 1.336076517                       |
| 0.001593475                               | 0.064858504                                        | 0.062222083                   | 172.6929601                              | 1.275592314                       |
| 0.001423584                               | 0.082049774                                        | 0.118512158                   | 251.4076549                              | 1.317384388                       |
| 0.005763763                               | 0.060145571                                        | 0.06216251                    | 47.48761417                              | 1.182056138                       |
| 0.004684584                               | 0.077229075                                        | 0.095682667                   | 74.92246203                              | 1.265416286                       |
| 0.003214888                               | 0.072991857                                        | 0.079928976                   | 100.335011                               | 1.230988649                       |
| 0.006984919                               | 0.095379115                                        | 0.106417357                   | 83.16252459                              | 1.302141655                       |
| 0.003388581                               | 0.091898263                                        | 0.099759645                   | 138.608018                               | 1.285846207                       |
| 0.004415292                               | 0.077447248                                        | 0.090744932                   | 73.69489696                              | 1.252666292                       |
| 0.00380324                                | 0.068948171                                        | 0.064313635                   | 122.1336753                              | 1.188750846                       |
| 0.005090995                               | 0.075784517                                        | 0.070015688                   | 158.7420592                              | 1.202110356                       |
| 0.001693831                               | 0.084392702                                        | 0.09467005                    | 332.1913314                              | 1.269468153                       |
| 0.006117604                               | 0.071134668                                        | 0.086892292                   | 38.6697327                               | 1.238131352                       |
| 0.025868609                               | 0.115175095                                        | 0.0850093                     | 14.25043599                              | 1.260884938                       |
| 0.01014842                                | 0.062270054                                        | 0.059924917                   | 29.28101394                              | 1.177809803                       |
| 0.003413962                               | 0.095420085                                        | 0.134263625                   | 295.1106725                              | 1.362171003                       |
| 0.00452908                                | 0.073560097                                        | 0.087563022                   | 56.51443429                              | 1.248211413                       |
| 0.00147485                                | 0.054336305                                        | 0.06001752                    | 196.9307252                              | 1.172117365                       |
| 0.004959824                               | 0.063290221                                        | 0.062291963                   | 35.4099813                               | 1.17898513                        |
| 0.002442047                               | 0.134496456                                        | 0.177889307                   | 772.5444903                              | 1.472997328                       |
| 0.005094861                               | 0.064661564                                        | 0.064996932                   | 53.6366326                               | 1.188180634                       |
| 0.003230434                               | 0.088021242                                        | 0.091380711                   | 178.4003871                              | 1.263199792                       |
| 0.002547073                               | 0.066927248                                        | 0.077543484                   | 81.01947981                              | 1.2192791875                      |
| 0.004315841                               | 0.111112025                                        | 0.173622379                   | 79.75689108                              | 1.461795811                       |
| 0.007184432                               | 0.146086006                                        | 0.157811843                   | 113.4157739                              | 1.447306624                       |
| 0.004378098                               | 0.109907664                                        | 0.126185045                   | 210.3412383                              | 1.353035782                       |
| 0.001561722                               | 0.068751381                                        | 0.105866329                   | 347.6857937                              | 1.28134784                        |
| 0.0024415                                 | 0.09208668                                         | 0.123588892                   | 259.081877                               | 1.333932053                       |
| 0.001406365                               | 0.155436706                                        | 0.266467526                   | 354.9527102                              | 1.700711374                       |
| 0.025591489                               | 0.104439024                                        | 0.095054427                   | 20.84951379                              | 1.278102627                       |
| 0.007210385                               | 0.11349896                                         | 0.138821896                   | 158.633151                               | 1.374413441                       |
| 0.007635242                               | 0.061960797                                        | 0.045162875                   | 23.38835893                              | 1.135221468                       |
| 0.003923954                               | 0.092515312                                        | 0.116801759                   | 269.7399252                              | 1.32010989                        |
| 0.007202279                               | 0.076877173                                        | 0.069051101                   | 32.27659832                              | 1.19822378                        |
| 0.001750224                               | 0.060221992                                        | 0.060765182                   | 114.7368595                              | 1.175398795                       |
| 0.004030862                               | 0.090857623                                        | 0.132277177                   | 250.1183874                              | 1.35293423                        |
| 0.004932806                               | 0.088695731                                        | 0.105683                      | 91.63802075                              | 1.300346522                       |
| 0.01099469                                | 0.168773605                                        | 0.236106504                   | 738.9663543                              | 1.632217906                       |
| 0.006349811                               | 0.158701788                                        | 0.237310333                   | 904.5377447                              | 1.628170924                       |
| 0.001109937                               | 0.095298795                                        | 0.136965988                   | 788.0683091                              | 1.371038571                       |
| 0.005001545                               | 0.06036662                                         | 0.05807952                    | 63.94505865                              | 1.16836047                        |
| 0.006359715                               | 0.062048596                                        | 0.05480548                    | 65.9518741                               | 1.159675772                       |
| 0.011423564                               | 0.068925494                                        | 0.060097291                   | 39.80156984                              | 1.176786292                       |
| 0.003632143                               | 0.086548119                                        | 0.097366787                   | 140.795986                               | 1.273994688                       |
| 0.002311903                               | 0.056956453                                        | 0.080924068                   | 151.4184462                              | 1.228610828                       |
| 0.005368661                               | 0.106169231                                        | 0.115472189                   | 48.76401064                              | 1.322563214                       |
| 0.00323106                                | 0.063825492                                        | 0.061590738                   | 81.08565813                              | 1.176148469                       |
| 0.0030059                                 | 0.054436341                                        | 0.054774023                   | 144.9559628                              | 1.154868123                       |
| 0.003061548                               | 0.154450981                                        | 0.125363984                   | 20.05910251                              | 1.375688601                       |
| 0.006909938                               | 0.111146457                                        | 0.117267118                   | 342.0198858                              | 1.332513614                       |
| 0.003011164                               | 0.079662398                                        | 0.093039166                   | 403.4896461                              | 1.262659308                       |
| 0.010681867                               | 0.100259881                                        | 0.104660051                   | 71.26390472                              | 1.303586356                       |
| 0.002036124                               | 0.043396017                                        | 0.048756885                   | 64.45691367                              | 1.141042911                       |
| 0.007133075                               | 0.080039301                                        | 0.071582472                   | 13.74564803                              | 1.21456038                        |
| 0.027095857                               | 0.103502429                                        | 0.084252693                   | 10.17198251                              | 1.233787808                       |
| 0.001294527                               | 0.093101888                                        | 0.140112303                   | 333.2785226                              | 1.374817073                       |
| 0.005486716                               | 0.045827645                                        | 0.047239998                   | 31.07245373                              | 1.132574786                       |
| 0.002748045                               | 0.051594138                                        | 0.051988896                   | 50.24973016                              | 1.153795152                       |
| 0.001635035                               | 0.090560768                                        | 0.159511791                   | 330.9163622                              | 1.415406109                       |
| 0.001040151                               | 0.099140303                                        | 0.150140551                   | 515.0928283                              | 1.400209369                       |
| 0.018007527                               | 0.072312371                                        | 0.059836852                   | 17.32976825                              | 1.1755671                         |
| 0.002344696                               | 0.063004736                                        | 0.066190361                   | 72.3124968                               | 1.189214244                       |
| 0.023323386                               | 0.122968036                                        | 0.097004615                   | 13.90044499                              | 1.285038014                       |
| 0.010111794                               | 0.10610415                                         | 0.105204978                   | 36.70723958                              | 1.306627624                       |
| 0.005108957                               | 0.114427463                                        | 0.19381547                    | 80.72475731                              | 1.505132334                       |

| wavelet.HHH_glrIm_ShortRunHighGrayLevelEmphasis | wavelet.HHH_glrIm_RunLengthNonUniformity | wavelet.HHH_glrIm_ShortRunEmphasis | wavelet.HHH_glrIm_LongRunHighGrayLevelEmphasis | wavelet.HHH_glrIm_RunPercentage |
|-------------------------------------------------|------------------------------------------|------------------------------------|------------------------------------------------|---------------------------------|
| 454.4962323                                     | 566.615173                               | 0.945082606                        | 600.0891309                                    | 0.926345609                     |
| 297.5559394                                     | 1504.329618                              | 0.920717303                        | 455.5125435                                    | 0.889411503                     |
| 434.4855245                                     | 388.9147859                              | 0.97245218                         | 496.9264115                                    | 0.963310883                     |
| 307.7051343                                     | 2135.876531                              | 0.947938988                        | 402.4202616                                    | 0.92874033                      |
| 80.61588034                                     | 289.1661161                              | 0.945495649                        | 104.2855012                                    | 0.928862224                     |
| 238.3192327                                     | 513.8599917                              | 0.943702101                        | 316.2794315                                    | 0.92594808                      |
| 653.682457                                      | 297.0043673                              | 0.968259534                        | 763.0570619                                    | 0.957772198                     |
| 533.5432942                                     | 866.5627939                              | 0.963559277                        | 423.3428962                                    | 0.951635191                     |
| 367.4170427                                     | 1619.581667                              | 0.937601856                        | 503.7219145                                    | 0.917452917                     |
| 418.0024098                                     | 2524.245658                              | 0.948805569                        | 540.701365                                     | 0.931643244                     |
| 712.730013                                      | 709.2316376                              | 0.961335544                        | 860.4944247                                    | 0.949121012                     |
| 997.9488834                                     | 1241.624489                              | 0.955767664                        | 1252.298537                                    | 0.940361258                     |
| 894.9958217                                     | 1668.654063                              | 0.945717556                        | 1186.890582                                    | 0.926934204                     |
| 845.5475003                                     | 898.7864477                              | 0.945790936                        | 1130.899097                                    | 0.925209853                     |
| 108.3837587                                     | 684.262988                               | 0.928356131                        | 153.7519845                                    | 0.905851558                     |
| 185.2707548                                     | 3929.111081                              | 0.859596493                        | 390.5420542                                    | 0.813223195                     |
| 202.2165394                                     | 522.9280595                              | 0.927453583                        | 290.4645011                                    | 0.905333921                     |
| 444.2925112                                     | 1751.514582                              | 0.928895837                        | 648.1317805                                    | 0.902460747                     |
| 306.1397975                                     | 483.0163342                              | 0.953116594                        | 387.7347913                                    | 0.937615649                     |
| 296.7131392                                     | 2050.883594                              | 0.922624743                        | 449.8230778                                    | 0.892703155                     |
| 197.9931127                                     | 3606.254928                              | 0.908947819                        | 322.7577459                                    | 0.874558252                     |
| 557.5565462                                     | 1463.032021                              | 0.959401197                        | 681.0479911                                    | 0.946153846                     |
| 39.43611523                                     | 1679.909496                              | 0.879297262                        | 73.2698664                                     | 0.840407853                     |
| 394.3092501                                     | 411.236974                               | 0.96045524                         | 475.9690062                                    | 0.948504718                     |
| 381.4162873                                     | 983.6357                                 | 0.949740359                        | 498.9731034                                    | 0.930168669                     |
| 244.0552037                                     | 560.8698556                              | 0.946222239                        | 326.0750185                                    | 0.926734649                     |
| 1438.42286                                      | 2862.26611                               | 0.952105503                        | 1838.440829                                    | 0.935749478                     |
| 571.8549749                                     | 1206.496141                              | 0.956461109                        | 704.053892                                     | 0.942508991                     |
| 1104.719589                                     | 1495.14706                               | 0.957352928                        | 1372.099368                                    | 0.942863369                     |
| 429.3980232                                     | 1736.009271                              | 0.906037988                        | 714.5470025                                    | 0.871209829                     |
| 858.9857203                                     | 2637.558339                              | 0.953195106                        | 1089.021362                                    | 0.937498488                     |
| 287.0221224                                     | 4183.325588                              | 0.912668217                        | 454.1116023                                    | 0.883240368                     |
| 2856.242013                                     | 1661.532993                              | 0.949910752                        | 3728.887429                                    | 0.931174089                     |
| 308.7103763                                     | 93.63691301                              | 0.973184973                        | 354.3571044                                    | 0.965236686                     |
| 513.3557108                                     | 300.4364805                              | 0.974753483                        | 582.2260468                                    | 0.965940686                     |
| 296.5454427                                     | 1534.244911                              | 0.931601759                        | 421.5788301                                    | 0.907730388                     |
| 973.9727845                                     | 2312.15643                               | 0.945006498                        | 1305.232825                                    | 0.924465812                     |
| 949.8116552                                     | 2602.944598                              | 0.937329979                        | 1328.902897                                    | 0.913559011                     |
| 375.1352238                                     | 709.7799832                              | 0.958874787                        | 457.0765614                                    | 0.945647167                     |
| 498.3551576                                     | 839.2400268                              | 0.944591086                        | 663.2725855                                    | 0.924763511                     |
| 632.9166535                                     | 1203.577662                              | 0.949113233                        | 818.0361177                                    | 0.932522701                     |
| 263.2200835                                     | 738.7291475                              | 0.936371968                        | 364.743052                                     | 0.91492453                      |
| 406.4724636                                     | 1284.480809                              | 0.938607664                        | 553.5011543                                    | 0.918485899                     |
| 383.4001669                                     | 828.706227                               | 0.946940789                        | 501.2689602                                    | 0.928255159                     |
| 422.495462                                      | 1582.097052                              | 0.957016809                        | 522.562679                                     | 0.943229295                     |
| 310.9803159                                     | 1861.242194                              | 0.954938147                        | 387.6528811                                    | 0.940132578                     |
| 728.509681                                      | 3380.750975                              | 0.94203199                         | 975.9520637                                    | 0.922698258                     |
| 352.2428324                                     | 477.596957                               | 0.950388849                        | 453.342871                                     | 0.93231297                      |
| 91.78371786                                     | 105.7774128                              | 0.939667889                        | 124.4465584                                    | 0.923076923                     |
| 361.7982348                                     | 422.3522138                              | 0.959041686                        | 439.8964075                                    | 0.946138369                     |
| 365.729983                                      | 2570.397773                              | 0.928869108                        | 532.1509298                                    | 0.903059849                     |
| 461.3352346                                     | 669.3419574                              | 0.946880237                        | 603.4312468                                    | 0.928936843                     |
| 1050.455132                                     | 3277.639908                              | 0.961615306                        | 1274.428203                                    | 0.948523343                     |
| 480.8054226                                     | 504.3038226                              | 0.960260005                        | 588.3097272                                    | 0.946635429                     |
| 473.4714355                                     | 4572.499043                              | 0.911807758                        | 758.0345231                                    | 0.879927829                     |
| 392.1261201                                     | 742.5593416                              | 0.957828165                        | 480.1299634                                    | 0.943729763                     |
| 409.7638935                                     | 1744.842245                              | 0.942720451                        | 546.9920704                                    | 0.924129222                     |
| 817.2613011                                     | 1069.554838                              | 0.952618024                        | 1034.554629                                    | 0.936224642                     |
| 359.5307417                                     | 574.2820521                              | 0.913886033                        | 568.3462166                                    | 0.881685882                     |
| 170.9598635                                     | 613.2909305                              | 0.909580697                        | 269.1418251                                    | 0.881079193                     |
| 292.2079629                                     | 1582.435539                              | 0.927271045                        | 423.8674311                                    | 0.903111047                     |
| 911.4197763                                     | 4378.090718                              | 0.944447132                        | 1227.327077                                    | 0.92299267                      |
| 530.0314428                                     | 2370.932782                              | 0.933962342                        | 752.9358433                                    | 0.910082151                     |
| 932.8914987                                     | 1665.442746                              | 0.878142226                        | 1802.962483                                    | 0.835929358                     |
| 92.42170748                                     | 170.0947487                              | 0.938754732                        | 123.2626922                                    | 0.919886565                     |
| 205.5377057                                     | 1154.540339                              | 0.926707129                        | 299.8093665                                    | 0.899846451                     |
| 316.2823694                                     | 347.0102485                              | 0.968022637                        | 371.265564                                     | 0.958024209                     |
| 369.2038605                                     | 2460.557299                              | 0.935002682                        | 517.8564296                                    | 0.911888549                     |
| 276.0682461                                     | 374.1624772                              | 0.955994228                        | 343.8831123                                    | 0.941359089                     |
| 931.3043663                                     | 1718.31113                               | 0.960625298                        | 1135.779776                                    | 0.947404659                     |
| 332.8973393                                     | 2303.223719                              | 0.931406042                        | 478.9834451                                    | 0.905516194                     |
| 374.976368                                      | 874.9629314                              | 0.936355213                        | 515.2189395                                    | 0.915173401                     |
| 101.5206153                                     | 3251.762382                              | 0.885435379                        | 184.5859376                                    | 0.847017147                     |
| 166.7317409                                     | 4260.110631                              | 0.887895072                        | 302.5513375                                    | 0.848490402                     |
| 1065.584881                                     | 6835.425258                              | 0.926816083                        | 1565.263066                                    | 0.900703871                     |
| 470.1729218                                     | 958.4646707                              | 0.961931975                        | 568.9189552                                    | 0.949200441                     |
| 320.9009398                                     | 966.4841638                              | 0.963718033                        | 383.9389897                                    | 0.951587356                     |
| 220.7540817                                     | 519.5423857                              | 0.959606549                        | 268.7292326                                    | 0.94665826                      |
| 449.0448275                                     | 1396.784646                              | 0.941821952                        | 605.0593751                                    | 0.922161172                     |
| 699.4917057                                     | 2341.064918                              | 0.95094751                         | 899.3760588                                    | 0.934131575                     |
| 331.2184546                                     | 386.2092995                              | 0.933314426                        | 466.2843358                                    | 0.911019536                     |
| 508.9804757                                     | 1146.183032                              | 0.960831238                        | 619.2661192                                    | 0.947341249                     |
| 632.9955166                                     | 2435.426558                              | 0.965798433                        | 750.6415423                                    | 0.953741459                     |
| 70.42263082                                     | 105.2434498                              | 0.918349683                        | 103.9622491                                    | 0.895490716                     |
| 177.0961596                                     | 2565.175626                              | 0.930284541                        | 251.5725299                                    | 0.90747                         |
| 411.3495539                                     | 4372.41312                               | 0.943811607                        | 546.5788731                                    | 0.924931168                     |
| 155.7593764                                     | 598.8794557                              | 0.934431243                        | 214.3279639                                    | 0.91358513                      |
| 1074.449197                                     | 1365.930021                              | 0.967990267                        | 1262.332229                                    | 0.957077716                     |
| 867.4499865                                     | 151.7012406                              | 0.951695621                        | 1096.280765                                    | 0.93768642                      |
| 110.6628949                                     | 87.0680528                               | 0.95253623                         | 143.5607573                                    | 0.934798535                     |
| 997.9108129                                     | 2966.176962                              | 0.927595058                        | 1473.607487                                    | 0.900474117                     |
| 683.9012895                                     | 628.6906066                              | 0.971003285                        | 793.5041421                                    | 0.960230987                     |
| 730.8796904                                     | 886.8257493                              | 0.964297462                        | 866.3250438                                    | 0.952958001                     |
| 827.3756097                                     | 2994.066126                              | 0.923160568                        | 1257.9598                                      | 0.893097611                     |
| 1178.721184                                     | 4254.713479                              | 0.923188528                        | 1780.879087                                    | 0.894803784                     |
| 141.8637351                                     | 215.7457116                              | 0.959908589                        | 173.2553654                                    | 0.947096382                     |
| 803.9504067                                     | 1028.577243                              | 0.958211024                        | 994.0809611                                    | 0.943825911                     |
| 91.53831032                                     | 96.33614891                              | 0.937975288                        | 124.0861385                                    | 0.918699187                     |
| 205.7742059                                     | 290.6007053                              | 0.933333273                        | 285.1760299                                    | 0.912725797                     |
| 289.415357                                      | 557.5136287                              | 0.909100925                        | 471.3597416                                    | 0.873891907                     |

| wavelet.HHH_glrIm_LongRunLowGrayLevelEmphasis | wavelet.HHH_glrIm_RunEntropy | wavelet.HHH_glrIm_HighGrayLevelRunEmphasis | wavelet.HHH_glrIm_RunLengthNonUniformityNormalized | wavelet.HHH_glszm_GrayLevelVariance |
|-----------------------------------------------|------------------------------|--------------------------------------------|----------------------------------------------------|-------------------------------------|
| 0.005180098                                   | 4.358193626                  | 480.248722                                 | 0.866058665                                        | 35.78801563                         |
| 0.008161864                                   | 4.431229687                  | 322.0074684                                | 0.813803279                                        | 33.88136049                         |
| 0.006304997                                   | 4.665054098                  | 446.3250301                                | 0.929988689                                        | 44.50947552                         |
| 0.005609181                                   | 4.427300086                  | 323.9625838                                | 0.87260239                                         | 29.27059382                         |
| 0.042892801                                   | 4.013489103                  | 84.99436221                                | 0.866643772                                        | 15.51089488                         |
| 0.008767134                                   | 4.23373475                   | 252.3931656                                | 0.862629602                                        | 26.03227654                         |
| 0.005325914                                   | 4.633865836                  | 674.058675                                 | 0.919863728                                        | 42.55515235                         |
| 0.005723708                                   | 4.583947267                  | 366.4989746                                | 0.908488628                                        | 34.6331463                          |
| 0.004390373                                   | 4.137848401                  | 391.6699206                                | 0.848930295                                        | 23.45905158                         |
| 0.004230922                                   | 4.43669072                   | 439.9984298                                | 0.874296531                                        | 31.77699869                         |
| 0.003799437                                   | 4.646171459                  | 740.545221                                 | 0.903175542                                        | 43.60153938                         |
| 0.002513607                                   | 5.007576829                  | 1043.516966                                | 0.890573141                                        | 80.9654945                          |
| 0.002003049                                   | 4.366230262                  | 945.8867397                                | 0.867517285                                        | 33.02313088                         |
| 0.002873545                                   | 4.583540228                  | 893.4197898                                | 0.86830642                                         | 46.24546585                         |
| 0.016650843                                   | 3.827983936                  | 116.3861856                                | 0.828854565                                        | 14.0900608                          |
| 0.009439682                                   | 3.63407519                   | 214.9065489                                | 0.694804498                                        | 15.04693834                         |
| 0.008696039                                   | 3.879940083                  | 217.8665506                                | 0.827009998                                        | 16.41835598                         |
| 0.004238525                                   | 4.447282121                  | 477.3117799                                | 0.831353644                                        | 37.58847236                         |
| 0.006561751                                   | 4.29021677                   | 320.9336169                                | 0.884483615                                        | 24.98890494                         |
| 0.005845585                                   | 4.303100298                  | 320.4288817                                | 0.818592781                                        | 27.04531724                         |
| 0.008139086                                   | 3.98412634                   | 217.3288017                                | 0.789089597                                        | 16.35356324                         |
| 0.003157256                                   | 4.624397809                  | 580.409269                                 | 0.898682256                                        | 39.24247496                         |
| 0.048633027                                   | 3.370101431                  | 44.67590868                                | 0.731043371                                        | 7.505463511                         |
| 0.006420197                                   | 4.6040901                    | 409.8301068                                | 0.900994114                                        | 40.42471484                         |
| 0.005898035                                   | 4.636193617                  | 400.9779795                                | 0.87752051                                         | 40.64774158                         |
| 0.011670397                                   | 4.425926342                  | 257.8205086                                | 0.870202508                                        | 28.00873203                         |
| 0.001277913                                   | 4.683735709                  | 1509.741525                                | 0.882060139                                        | 48.20843987                         |
| 0.003792541                                   | 4.773680447                  | 596.1540855                                | 0.892417665                                        | 52.1534102                          |
| 0.002203861                                   | 5.170391452                  | 1151.480239                                | 0.896060906                                        | 95.73905432                         |
| 0.003976456                                   | 4.216384233                  | 473.1898381                                | 0.783293417                                        | 25.57368347                         |
| 0.001967807                                   | 4.712085875                  | 900.3413049                                | 0.884521759                                        | 48.41616229                         |
| 0.005329466                                   | 4.005776417                  | 314.0867262                                | 0.797240224                                        | 18.83407194                         |
| 0.00098545                                    | 4.741336325                  | 3005.050539                                | 0.877329879                                        | 68.76331252                         |
| 0.018162481                                   | 4.384882621                  | 317.6225274                                | 0.93212983                                         | 45.38556213                         |
| 0.010147321                                   | 4.944437158                  | 525.9429487                                | 0.93614932                                         | 64.4495372                          |
| 0.00556194                                    | 4.180417361                  | 317.7407633                                | 0.836351468                                        | 23.04796596                         |
| 0.001883916                                   | 4.811164551                  | 1029.471484                                | 0.86711427                                         | 58.46011489                         |
| 0.001749574                                   | 4.473802859                  | 1012.359471                                | 0.849210528                                        | 35.80181014                         |
| 0.006417661                                   | 4.688040414                  | 390.1492816                                | 0.898065448                                        | 45.11034159                         |
| 0.00522911                                    | 4.48686439                   | 526.8498531                                | 0.864946926                                        | 37.69037886                         |
| 0.003581463                                   | 4.489673036                  | 666.3971481                                | 0.875116408                                        | 36.07120613                         |
| 0.008133331                                   | 4.138090285                  | 280.8796012                                | 0.846775667                                        | 23.40132023                         |
| 0.004086354                                   | 4.214473623                  | 432.5069091                                | 0.851377566                                        | 26.06189991                         |
| 0.005113356                                   | 4.391200805                  | 403.9771491                                | 0.87043577                                         | 29.78284732                         |
| 0.004274683                                   | 4.503365819                  | 441.0283717                                | 0.892929407                                        | 34.81736377                         |
| 0.005806542                                   | 4.355289527                  | 325.0013631                                | 0.888264041                                        | 26.1794638                          |
| 0.002060211                                   | 4.328750751                  | 772.3477913                                | 0.858781676                                        | 30.5672923                          |
| 0.006841957                                   | 4.520142857                  | 369.7313565                                | 0.878312142                                        | 38.71093545                         |
| 0.028837505                                   | 3.783737659                  | 97.93452131                                | 0.854076065                                        | 14.96683115                         |
| 0.010709666                                   | 4.563014152                  | 376.5243314                                | 0.897814739                                        | 39.52764566                         |
| 0.004389089                                   | 4.270432015                  | 393.1105419                                | 0.830723111                                        | 25.44334644                         |
| 0.005097419                                   | 4.510620986                  | 486.4676666                                | 0.870469978                                        | 42.00851154                         |
| 0.001650415                                   | 4.866059572                  | 1091.413486                                | 0.904050527                                        | 55.97964954                         |
| 0.005369836                                   | 4.623782431                  | 500.3982461                                | 0.901030358                                        | 43.28884116                         |
| 0.003393759                                   | 4.108074641                  | 518.2224974                                | 0.795448222                                        | 32.86379056                         |
| 0.005676827                                   | 4.575070739                  | 408.2837187                                | 0.894971135                                        | 38.52333333                         |
| 0.003874069                                   | 4.251022566                  | 434.3194153                                | 0.860560072                                        | 26.16015625                         |
| 0.002841483                                   | 4.709122787                  | 855.5825727                                | 0.883170651                                        | 73.76527486                         |
| 0.005554731                                   | 4.11380025                   | 392.5216884                                | 0.799580542                                        | 26.8201562                          |
| 0.009708917                                   | 3.615616822                  | 187.4570572                                | 0.78968599                                         | 12.62458411                         |
| 0.005560766                                   | 3.985206819                  | 314.6728066                                | 0.826620114                                        | 18.5862742                          |
| 0.001870755                                   | 4.703269417                  | 963.648327                                 | 0.865272296                                        | 47.89294932                         |
| 0.003057811                                   | 4.33278081                   | 566.8771296                                | 0.842087647                                        | 29.17283383                         |
| 0.002071691                                   | 3.904595702                  | 1061.718171                                | 0.728797974                                        | 22.38296445                         |
| 0.030438015                                   | 3.91290584                   | 97.92492052                                | 0.851592844                                        | 16.60058594                         |
| 0.009058055                                   | 4.039410686                  | 220.9586672                                | 0.825934137                                        | 21.46360055                         |
| 0.00810883                                    | 4.476316898                  | 326.8383257                                | 0.919056606                                        | 33.75752315                         |
| 0.00479471                                    | 4.305138797                  | 394.3329812                                | 0.843723768                                        | 28.31601954                         |
| 0.007974763                                   | 4.262039453                  | 288.2912336                                | 0.890840689                                        | 24.64973107                         |
| 0.001943041                                   | 4.713809155                  | 968.8437892                                | 0.901628905                                        | 47.1245174                          |
| 0.005091216                                   | 4.332979901                  | 356.729928                                 | 0.836300417                                        | 28.03385291                         |
| 0.005745815                                   | 4.310457467                  | 399.4714258                                | 0.846505513                                        | 33.17758054                         |
| 0.016899546                                   | 3.640443565                  | 114.2728513                                | 0.742294282                                        | 11.70757217                         |
| 0.009867481                                   | 3.781110937                  | 187.3273646                                | 0.747142438                                        | 15.1593304                          |
| 0.00144435                                    | 4.405741339                  | 1148.008656                                | 0.826179681                                        | 40.34189007                         |
| 0.005384462                                   | 4.650006673                  | 488.3727188                                | 0.904617438                                        | 42.45027357                         |
| 0.006948478                                   | 4.555893327                  | 332.545777                                 | 0.908999235                                        | 34.63463147                         |
| 0.012409876                                   | 4.42967603                   | 229.6426897                                | 0.899279601                                        | 28.79907182                         |
| 0.004386833                                   | 4.297403276                  | 476.3570283                                | 0.858423673                                        | 28.06487589                         |
| 0.002673458                                   | 4.931442327                  | 734.9344918                                | 0.879802839                                        | 64.51014458                         |
| 0.006329186                                   | 3.972235402                  | 354.2973406                                | 0.84030556                                         | 19.77192238                         |
| 0.003600238                                   | 4.571035898                  | 529.0401006                                | 0.902089441                                        | 36.64485555                         |
| 0.003281308                                   | 4.832816698                  | 654.2698972                                | 0.914218349                                        | 52.8711741                          |
| 0.038057933                                   | 3.369222513                  | 76.43873615                                | 0.809099154                                        | 8.04                                |
| 0.008822946                                   | 3.943792285                  | 190.0364819                                | 0.83321847                                         | 16.15205621                         |
| 0.003667413                                   | 4.389228917                  | 435.2111247                                | 0.86296577                                         | 29.13222569                         |
| 0.012758707                                   | 4.017150054                  | 166.2223508                                | 0.842226626                                        | 18.52884875                         |
| 0.002179581                                   | 5.104500942                  | 1109.186835                                | 0.91928571                                         | 76.71464315                         |
| 0.007383679                                   | 4.316485371                  | 909.6014302                                | 0.882284918                                        | 61.94048483                         |
| 0.029304787                                   | 3.841237387                  | 116.3168232                                | 0.88508466                                         | 14.92961266                         |
| 0.001651714                                   | 4.383164866                  | 1074.913133                                | 0.828192357                                        | 34.14228571                         |
| 0.005739097                                   | 4.982637504                  | 703.4682088                                | 0.926985331                                        | 69.08281837                         |
| 0.002982773                                   | 4.830737724                  | 756.5085169                                | 0.910233406                                        | 48.94855979                         |
| 0.002121044                                   | 4.536700527                  | 894.7308744                                | 0.819000248                                        | 47.054239                           |
| 0.001360129                                   | 4.356254988                  | 1275.592129                                | 0.818586561                                        | 38.21799327                         |
| 0.019610202                                   | 4.240581764                  | 147.7885354                                | 0.899939262                                        | 20.604589                           |
| 0.00258729                                    | 4.67144956                   | 838.3151535                                | 0.89600888                                         | 47.0922718                          |
| 0.02670685                                    | 3.67923076                   | 97.33274472                                | 0.851128425                                        | 13.53472222                         |
| 0.011627926                                   | 4.018318378                  | 219.9979074                                | 0.839649526                                        | 24.88998724                         |
| 0.006800851                                   | 4.100244623                  | 317.3661717                                | 0.789961843                                        | 23.68323951                         |



| wavelet.HHH_glszm_SmallAreaHighGrayLevelEmphasis | wavelet.HHH_glszm_GrayLevelNonUniformityNormalized | wavelet.HHH_glszm_SizeZoneNonUniformityNormalized | wavelet.HHH_glszm_SizeZoneNonUniformity |
|--------------------------------------------------|----------------------------------------------------|---------------------------------------------------|-----------------------------------------|
| 358.5986718                                      | 0.056984628                                        | 0.483567103                                       | 134.4316547                             |
| 251.8685193                                      | 0.05237339                                         | 0.470083817                                       | 337.9902643                             |
| 363.7528773                                      | 0.045013957                                        | 0.554545582                                       | 148.0636704                             |
| 238.0685637                                      | 0.052850449                                        | 0.454433429                                       | 506.6932735                             |
| 59.13965399                                      | 0.071994203                                        | 0.378293049                                       | 52.5827381                              |
| 164.6830994                                      | 0.059002469                                        | 0.397530864                                       | 89.44444444                             |
| 519.360838                                       | 0.047534626                                        | 0.488088643                                       | 92.73684211                             |
| 265.7579718                                      | 0.047698456                                        | 0.463689081                                       | 239.2635659                             |
| 264.3377432                                      | 0.064508226                                        | 0.420066578                                       | 280.1844078                             |
| 326.1487466                                      | 0.051583062                                        | 0.479362638                                       | 614.5429017                             |
| 558.4795028                                      | 0.046500357                                        | 0.475461688                                       | 188.2828283                             |
| 808.5727144                                      | 0.034898469                                        | 0.558766721                                       | 421.8688742                             |
| 689.9992951                                      | 0.055701766                                        | 0.46742989                                        | 375.3462017                             |
| 618.5290643                                      | 0.048460922                                        | 0.438134522                                       | 197.5986696                             |
| 81.33974973                                      | 0.08191502                                         | 0.412894376                                       | 100.3333333                             |
| 155.6026713                                      | 0.087312716                                        | 0.439462523                                       | 460.9961868                             |
| 161.6749143                                      | 0.079923764                                        | 0.497933219                                       | 100.0845771                             |
| 348.6082614                                      | 0.054280992                                        | 0.436541414                                       | 360.1466667                             |
| 223.256986                                       | 0.056872113                                        | 0.454548341                                       | 114.0916335                             |
| 231.6674277                                      | 0.056219959                                        | 0.407195401                                       | 365.6614699                             |
| 157.8365342                                      | 0.072628807                                        | 0.432200823                                       | 583.4711111                             |
| 425.6465215                                      | 0.046279576                                        | 0.456080708                                       | 378.546988                              |
| 34.65747409                                      | 0.127744905                                        | 0.411334648                                       | 160.4205128                             |
| 314.0423429                                      | 0.048186599                                        | 0.475240762                                       | 115.0082645                             |
| 301.6101618                                      | 0.046316832                                        | 0.49483388                                        | 278.5914742                             |
| 182.6852507                                      | 0.054829334                                        | 0.428403863                                       | 118.66787                               |
| 1096.282249                                      | 0.044476303                                        | 0.467400067                                       | 719.7961039                             |
| 458.2133892                                      | 0.041934694                                        | 0.510702041                                       | 357.4914286                             |
| 854.3778812                                      | 0.032937824                                        | 0.471605943                                       | 408.8823529                             |
| 339.3996901                                      | 0.060108627                                        | 0.446425229                                       | 334.3724967                             |
| 676.5629296                                      | 0.042775922                                        | 0.510869885                                       | 735.1417651                             |
| 213.9131012                                      | 0.069022963                                        | 0.404131939                                       | 630.0416934                             |
| 2301.344001                                      | 0.042215285                                        | 0.526215747                                       | 489.3806452                             |
| 239.4690028                                      | 0.051360947                                        | 0.588639053                                       | 38.26153846                             |
| 396.3019772                                      | 0.038358847                                        | 0.524474902                                       | 111.1886792                             |
| 235.9307166                                      | 0.063724779                                        | 0.457350486                                       | 303.6807229                             |
| 775.9226497                                      | 0.040560333                                        | 0.501789841                                       | 612.1836066                             |
| 718.482314                                       | 0.050691807                                        | 0.448785857                                       | 568.6116811                             |
| 287.8366304                                      | 0.046107282                                        | 0.417476755                                       | 162.3984576                             |
| 404.7864227                                      | 0.051615027                                        | 0.515258341                                       | 223.6221198                             |
| 513.627716                                       | 0.049724584                                        | 0.517343284                                       | 338.3425076                             |
| 197.5488574                                      | 0.063179642                                        | 0.446510456                                       | 140.6507937                             |
| 321.3037701                                      | 0.0604182                                          | 0.47303626                                        | 267.2654867                             |
| 293.6536002                                      | 0.054200004                                        | 0.445094668                                       | 189.6103286                             |
| 327.4742285                                      | 0.049660358                                        | 0.479108829                                       | 410.596266                              |
| 241.4230724                                      | 0.056267893                                        | 0.456337042                                       | 444.4722793                             |
| 575.4471456                                      | 0.055532298                                        | 0.473134441                                       | 713.4867374                             |
| 282.9848712                                      | 0.047249209                                        | 0.491549315                                       | 132.2267658                             |
| 47.95583779                                      | 0.081032141                                        | 0.368039837                                       | 17.29787234                             |
| 269.6835184                                      | 0.047488109                                        | 0.411414982                                       | 95.44827586                             |
| 287.9088986                                      | 0.05731583                                         | 0.468003975                                       | 557.8607383                             |
| 348.5181585                                      | 0.049161786                                        | 0.437165122                                       | 141.2043344                             |
| 819.1744222                                      | 0.040933436                                        | 0.493430123                                       | 952.8135681                             |
| 348.7592108                                      | 0.046036285                                        | 0.445292113                                       | 126.0176678                             |
| 396.4400873                                      | 0.058652873                                        | 0.487456537                                       | 860.8482446                             |
| 342.6881298                                      | 0.048956916                                        | 0.526575964                                       | 221.1619048                             |
| 296.1918425                                      | 0.058810764                                        | 0.429219564                                       | 329.640625                              |
| 685.7479179                                      | 0.042601134                                        | 0.517870699                                       | 297.7756522                             |
| 281.4494295                                      | 0.065674054                                        | 0.427285319                                       | 97.42105263                             |
| 141.3900011                                      | 0.1075364                                          | 0.450688318                                       | 81.57458564                             |
| 235.4660055                                      | 0.075488495                                        | 0.457285199                                       | 270.7128378                             |
| 734.892118                                       | 0.044274864                                        | 0.523097597                                       | 1257.526622                             |
| 398.0991241                                      | 0.055542981                                        | 0.440727013                                       | 497.1400709                             |
| 739.4321251                                      | 0.072918159                                        | 0.431398375                                       | 230.7981308                             |
| 80.96591168                                      | 0.078613281                                        | 0.384277344                                       | 24.59375                                |
| 179.7829486                                      | 0.066317003                                        | 0.509126469                                       | 254.0541082                             |
| 235.8465353                                      | 0.050197188                                        | 0.480195473                                       | 103.7222222                             |
| 287.1301425                                      | 0.056588181                                        | 0.468631887                                       | 534.2403509                             |
| 216.4677309                                      | 0.059569203                                        | 0.482386808                                       | 95.99497487                             |
| 721.5575069                                      | 0.044446169                                        | 0.500808112                                       | 514.8307393                             |
| 270.1895543                                      | 0.055397894                                        | 0.491031748                                       | 544.0631769                             |
| 299.726682                                       | 0.057744612                                        | 0.47299326                                        | 188.7243108                             |
| 83.63066565                                      | 0.097829793                                        | 0.429777051                                       | 391.5268935                             |
| 133.7719282                                      | 0.078349557                                        | 0.435926592                                       | 553.6267717                             |
| 860.2822601                                      | 0.052753253                                        | 0.496218622                                       | 1514.955454                             |
| 358.9713265                                      | 0.045323479                                        | 0.469294439                                       | 266.0899471                             |
| 240.8887828                                      | 0.049307645                                        | 0.448020327                                       | 253.5795053                             |
| 174.3676137                                      | 0.054417736                                        | 0.450722028                                       | 134.7658863                             |
| 339.9610105                                      | 0.057755279                                        | 0.441082653                                       | 287.5858896                             |
| 542.788141                                       | 0.037743151                                        | 0.488723613                                       | 633.3858025                             |
| 267.7869039                                      | 0.073569693                                        | 0.460437483                                       | 74.13043478                             |
| 405.6596671                                      | 0.048212092                                        | 0.49800689                                        | 337.1506647                             |
| 518.3508644                                      | 0.041734166                                        | 0.545293179                                       | 844.6591349                             |
| 46.59923354                                      | 0.115555556                                        | 0.302222222                                       | 9.066666667                             |
| 135.4499673                                      | 0.075540365                                        | 0.428420139                                       | 411.2833333                             |
| 307.5623282                                      | 0.053940778                                        | 0.424368789                                       | 864.8635918                             |
| 124.7725265                                      | 0.071125855                                        | 0.449659529                                       | 112.8645418                             |
| 838.7483128                                      | 0.033360439                                        | 0.499085194                                       | 437.1986301                             |
| 759.4154473                                      | 0.052402381                                        | 0.581071273                                       | 48.22891566                             |
| 65.85085135                                      | 0.077051229                                        | 0.414410662                                       | 20.30612245                             |
| 796.8532765                                      | 0.054181861                                        | 0.482851073                                       | 668.7487365                             |
| 573.0645224                                      | 0.036127609                                        | 0.581426325                                       | 248.8504673                             |
| 573.2254794                                      | 0.041603884                                        | 0.496292584                                       | 280.4053097                             |
| 677.4336479                                      | 0.048495113                                        | 0.50594748                                        | 753.861745                              |
| 941.5283343                                      | 0.054909825                                        | 0.478522915                                       | 904.8868324                             |
| 104.9296363                                      | 0.062708844                                        | 0.502784585                                       | 67.37313433                             |
| 626.4857408                                      | 0.046284565                                        | 0.496015493                                       | 303.0654664                             |
| 80.04274888                                      | 0.088541667                                        | 0.468875                                          | 22.5                                    |
| 166.6868564                                      | 0.066804847                                        | 0.493303571                                       | 55.25                                   |
| 243.1299525                                      | 0.065560494                                        | 0.470498765                                       | 105.8622222                             |

| wavelet.HHH_glszm_GrayLevelNonUniformity | wavelet.HHH_glszm_LargeAreaEmphasis | wavelet.HHH_glszm_ZoneVariance | wavelet.HHH_glszm_ZonePercentage | wavelet.HHH_glszm_LargeAreaLowGrayLevelEmphasis |
|------------------------------------------|-------------------------------------|--------------------------------|----------------------------------|-------------------------------------------------|
| 15.84172662                              | 54.30215827                         | 47.85257089                    | 0.393767705                      | 0.123892051                                     |
| 37.65646732                              | 309.9235049                         | 301.5781877                    | 0.346172364                      | 1.028167631                                     |
| 12.01872659                              | 5.453183521                         | 2.811036766                    | 0.615207373                      | 0.02069704                                      |
| 58.92825112                              | 73.36233184                         | 67.77748195                    | 0.423149905                      | 0.243138789                                     |
| 10.00719424                              | 21.58992806                         | 14.91941411                    | 0.38718663                       | 0.417121317                                     |
| 13.27555556                              | 38.52888889                         | 30.36199506                    | 0.34992224                       | 0.174786684                                     |
| 9.031578947                              | 6.1                                 | 2.954044321                    | 0.56379822                       | 0.015994061                                     |
| 24.6124031                               | 10.51162791                         | 6.740805841                    | 0.51497006                       | 0.036047655                                     |
| 43.02698651                              | 127.1529235                         | 117.437599                     | 0.320827321                      | 0.340140811                                     |
| 66.12948518                              | 39.91575663                         | 34.07610719                    | 0.413815365                      | 0.099225082                                     |
| 18.41414141                              | 16.68434343                         | 12.32299638                    | 0.478839178                      | 0.029644294                                     |
| 26.34834437                              | 35.92317881                         | 32.0701478                     | 0.509446694                      | 0.038729435                                     |
| 44.72851806                              | 78.2366127                          | 71.56568224                    | 0.387174542                      | 0.085174178                                     |
| 21.85587583                              | 49.7827051                          | 43.6375829                     | 0.403398927                      | 0.060615796                                     |
| 19.90534979                              | 144.5473251                         | 130.4925401                    | 0.266739846                      | 1.361543686                                     |
| 91.59103908                              | 9247.169685                         | 9203.312211                    | 0.151000432                      | 44.23815447                                     |
| 16.06467662                              | 170.1390353                         | 158.080097                     | 0.287965616                      | 0.805169256                                     |
| 44.78181818                              | 231.5490909                         | 223.5590465                    | 0.353773585                      | 0.506387165                                     |
| 14.2749004                               | 27.73705179                         | 22.36056571                    | 0.431271478                      | 0.098168641                                     |
| 50.48552339                              | 396.642539                          | 386.9134193                    | 0.320599786                      | 1.312295354                                     |
| 98.04888889                              | 1465.785185                         | 1450.811152                    | 0.258422665                      | 6.969021318                                     |
| 38.41204819                              | 13.29879518                         | 9.004412832                    | 0.48255814                       | 0.027138709                                     |
| 49.82051282                              | 3080.602564                         | 3031.566666                    | 0.142804833                      | 74.75938115                                     |
| 11.66115702                              | 9.450413223                         | 5.499846322                    | 0.503118503                      | 0.032034901                                     |
| 26.07637655                              | 32.07815275                         | 27.50478438                    | 0.467607973                      | 0.091386655                                     |
| 15.18772563                              | 24.50541516                         | 18.22831003                    | 0.399135447                      | 0.126210701                                     |
| 68.49350649                              | 68.44545455                         | 63.38003205                    | 0.444316215                      | 0.046829448                                     |
| 29.35428571                              | 20.29285714                         | 16.10206327                    | 0.488485694                      | 0.043600558                                     |
| 28.55709343                              | 17.34140715                         | 13.19710678                    | 0.49121813                       | 0.019309866                                     |
| 45.02136182                              | 465.5754339                         | 454.0571585                    | 0.294649882                      | 1.002780071                                     |
| 61.55455177                              | 57.93120222                         | 53.05075672                    | 0.452658069                      | 0.067293622                                     |
| 107.6067992                              | 1117.594612                         | 1103.126324                    | 0.262900506                      | 3.65497838                                      |
| 39.26021505                              | 86.73225806                         | 81.95356804                    | 0.457452041                      | 0.030427968                                     |
| 3.338461538                              | 4.8                                 | 2.24                           | 0.625                            | 0.037787201                                     |
| 8.132075472                              | 3.962264151                         | 1.509789961                    | 0.638554217                      | 0.027517942                                     |
| 42.31325301                              | 275.8162651                         | 266.5614748                    | 0.328712871                      | 0.916613637                                     |
| 49.48360656                              | 83.39672131                         | 77.8240258                     | 0.423611111                      | 0.085354737                                     |
| 64.22651934                              | 210.2020521                         | 203.1943943                    | 0.377757901                      | 0.212959257                                     |
| 17.93573265                              | 10.46529563                         | 5.857706465                    | 0.465868263                      | 0.038547911                                     |
| 22.40092166                              | 49.5                                | 43.65786596                    | 0.413727359                      | 0.103018154                                     |
| 32.51987768                              | 29.75535168                         | 24.67563523                    | 0.443690638                      | 0.04927577                                      |
| 19.9015873                               | 86.52380952                         | 77.37078357                    | 0.330535152                      | 0.320068729                                     |
| 34.13628319                              | 105.6743363                         | 97.22836871                    | 0.34409257                       | 0.258610108                                     |
| 23.08920188                              | 22.44835681                         | 16.65902378                    | 0.415609756                      | 0.064023836                                     |
| 42.55892649                              | 21.08751459                         | 16.28543303                    | 0.456336528                      | 0.054100173                                     |
| 54.80492813                              | 22.62422998                         | 17.39169116                    | 0.437163375                      | 0.080570033                                     |
| 83.74270557                              | 137.2984085                         | 129.2956627                    | 0.353492733                      | 1.80943977                                      |
| 12.71003717                              | 19.60223048                         | 14.90510081                    | 0.461406518                      | 0.063993899                                     |
| 3.808510638                              | 29.10638298                         | 20.97781802                    | 0.350746269                      | 0.353790175                                     |
| 11.01724138                              | 13.52155172                         | 8.932353597                    | 0.466800805                      | 0.056534159                                     |
| 68.3204698                               | 270.9949664                         | 262.7438066                    | 0.348130841                      | 0.715990227                                     |
| 15.87925697                              | 42.20123839                         | 35.64573608                    | 0.390568319                      | 0.098479916                                     |
| 79.04246504                              | 17.65665458                         | 13.74113385                    | 0.505365088                      | 0.018114179                                     |
| 13.02826855                              | 11.438816254                        | 7.077001835                    | 0.478849408                      | 0.030956984                                     |
| 103.580974                               | 1950.056059                         | 1936.41295                     | 0.270734325                      | 3.864060422                                     |
| 20.56190476                              | 24.42619048                         | 20.04613946                    | 0.4778157                        | 0.069072971                                     |
| 45.16666667                              | 142.8216146                         | 134.6679128                    | 0.350205198                      | 0.344332578                                     |
| 24.49565217                              | 33.96                               | 28.90336786                    | 0.444702243                      | 0.045624903                                     |
| 14.97368421                              | 206.9035088                         | 194.1573561                    | 0.28009828                       | 0.555403327                                     |
| 19.4640884                               | 474.8895028                         | 451.1978877                    | 0.205448354                      | 2.672086819                                     |
| 44.68918919                              | 324.9341216                         | 312.1220753                    | 0.279377065                      | 1.058504011                                     |
| 106.436772                               | 181.0973378                         | 175.9048542                    | 0.438846294                      | 0.198411987                                     |
| 62.65248227                              | 131.2251773                         | 123.7210748                    | 0.365048544                      | 0.235868125                                     |
| 39.01121495                              | 1922.816822                         | 1896.759137                    | 0.195898938                      | 1.82126658                                      |
| 5.03125                                  | 44.265625                           | 32.76928711                    | 0.294930876                      | 0.586895837                                     |
| 33.09218437                              | 323.1603206                         | 313.4743796                    | 0.321313587                      | 1.543966072                                     |
| 10.84259259                              | 6.842592593                         | 3.515346365                    | 0.54822335                       | 0.030241193                                     |
| 64.51052632                              | 281.7149123                         | 273.8503316                    | 0.356584298                      | 0.740685911                                     |
| 11.85427136                              | 22.17085427                         | 17.1478498                     | 0.446188341                      | 0.087956785                                     |
| 45.69066148                              | 16.15272374                         | 12.32590482                    | 0.511188463                      | 0.018531075                                     |
| 61.38086643                              | 220.1787004                         | 212.6509077                    | 0.364473684                      | 0.652547985                                     |
| 23.04010025                              | 136.6190476                         | 128.612559                     | 0.353410097                      | 0.37401646                                      |
| 89.12294182                              | 4236.17124                          | 4203.989594                    | 0.17627709                       | 38.95555931                                     |
| 99.50393701                              | 3695.692913                         | 3667.727971                    | 0.189100655                      | 20.8736553                                      |
| 161.0556829                              | 1155.939731                         | 1146.898413                    | 0.332570806                      | 1.031738242                                     |
| 25.6984127                               | 9.950617284                         | 6.0765936                      | 0.508064516                      | 0.027121981                                     |
| 27.90812721                              | 10.704947                           | 6.81025172                     | 0.506714414                      | 0.041709357                                     |
| 16.27090301                              | 11.35117057                         | 7.189024731                    | 0.490163934                      | 0.068585581                                     |
| 37.65644172                              | 100.1871166                         | 92.86727013                    | 0.369614512                      | 0.217924917                                     |
| 48.91512346                              | 48.99537037                         | 44.17300859                    | 0.455375966                      | 0.072186649                                     |
| 11.8447205                               | 57.97515528                         | 48.17553335                    | 0.319444444                      | 0.175247062                                     |
| 32.63958641                              | 14.68980798                         | 10.7662487                     | 0.504847129                      | 0.032390153                                     |
| 64.64622337                              | 12.63137508                         | 9.382537558                    | 0.554799427                      | 0.02420303                                      |
| 3.466666667                              | 79.76666667                         | 56.40555556                    | 0.206896552                      | 1.36970099                                      |
| 72.51875                                 | 265.5385417                         | 253.0614572                    | 0.28310233                       | 1.454211428                                     |
| 109.9313052                              | 71.99607458                         | 64.77638509                    | 0.372169467                      | 0.178564366                                     |
| 17.85258964                              | 99.23505976                         | 89.62752972                    | 0.322622108                      | 0.677000074                                     |
| 29.22374429                              | 7.433789954                         | 4.294906278                    | 0.56443299                       | 0.009005619                                     |
| 4.34939759                               | 21.81927711                         | 16.95804906                    | 0.453551913                      | 0.037281147                                     |
| 3.775510204                              | 8.959183673                         | 4.367346939                    | 0.466666667                      | 0.12070195                                      |
| 75.04187726                              | 359.5920578                         | 351.3549505                    | 0.348427673                      | 0.340192049                                     |
| 15.46261682                              | 8.953271028                         | 6.232312866                    | 0.606232295                      | 0.020587826                                     |
| 23.50619469                              | 7.752212389                         | 4.480275668                    | 0.552837573                      | 0.013848771                                     |
| 72.25771812                              | 573.0590604                         | 565.5242196                    | 0.364303178                      | 0.664113079                                     |
| 103.8344791                              | 655.5589635                         | 646.1320178                    | 0.325697554                      | 0.520046437                                     |
| 8.402985075                              | 10.84328358                         | 7.278514146                    | 0.529644269                      | 0.103560477                                     |
| 28.27986907                              | 12.36661211                         | 8.405795549                    | 0.502467105                      | 0.017517594                                     |
| 4.25                                     | 29.3125                             | 22.74609375                    | 0.390243902                      | 0.347613484                                     |
| 7.482142857                              | 86.9375                             | 75.48652742                    | 0.295514512                      | 0.436567942                                     |
| 14.75111111                              | 236.5111111                         | 223.6469333                    | 0.278810409                      | 0.787973909                                     |

| wavelet.HHH_glszm_LargeAreaHighGrayLevelEmphasis | wavelet.HHH_glszm_HighGrayLevelZoneEmphasis | wavelet.HHH_glszm_SmallAreaEmphasis | wavelet.HHH_glszm_LowGrayLevelZoneEmphasis | wavelet.HHH_glszm_ZoneEntropy |
|--------------------------------------------------|---------------------------------------------|-------------------------------------|--------------------------------------------|-------------------------------|
| 25237.50719                                      | 494.0251799                                 | 0.722386367                         | 0.007785523                                | 5.760336009                   |
| 95230.46314                                      | 341.4714882                                 | 0.71301882                          | 0.009117992                                | 6.012017372                   |
| 2288.640049                                      | 459.3258427                                 | 0.772806302                         | 0.007498034                                | 5.734400525                   |
| 22767.60359                                      | 335.1635919                                 | 0.700955282                         | 0.006122181                                | 6.036562529                   |
| 1722.597122                                      | 90.16546763                                 | 0.636810659                         | 0.053436396                                | 5.337697881                   |
| 9334.92                                          | 254.9155556                                 | 0.654238717                         | 0.012505413                                | 5.797135222                   |
| 4029.057895                                      | 693.3421053                                 | 0.726102626                         | 0.007389597                                | 5.747726122                   |
| 3732.422481                                      | 372.8081395                                 | 0.707370261                         | 0.006797248                                | 5.96553816                    |
| 48400.10795                                      | 394.035982                                  | 0.673943784                         | 0.00526281                                 | 5.898409143                   |
| 17138.83697                                      | 449.6318253                                 | 0.719878037                         | 0.004201345                                | 6.064164077                   |
| 11799.25758                                      | 764.5782828                                 | 0.716845957                         | 0.004832364                                | 6.023461505                   |
| 35889.85828                                      | 1045.911258                                 | 0.775354314                         | 0.003380276                                | 6.269618401                   |
| 73553.84433                                      | 959.4408468                                 | 0.710896439                         | 0.002589531                                | 6.020708597                   |
| 43586.86918                                      | 899.8957871                                 | 0.685726034                         | 0.004321422                                | 6.108933916                   |
| 16110.03292                                      | 123.090535                                  | 0.667951806                         | 0.021002829                                | 5.427143258                   |
| 1942681.752                                      | 225.3937083                                 | 0.688698334                         | 0.007795877                                | 5.542463403                   |
| 37143.72139                                      | 220.8656716                                 | 0.7320062                           | 0.011630137                                | 5.187015158                   |
| 107115.9345                                      | 494.7187879                                 | 0.686641409                         | 0.004941314                                | 6.147439802                   |
| 8580.992032                                      | 325.6175299                                 | 0.700964329                         | 0.008506476                                | 5.626711488                   |
| 120829.5579                                      | 339.9175947                                 | 0.662758605                         | 0.005940659                                | 6.121851172                   |
| 310243.057                                       | 226.26                                      | 0.683791768                         | 0.007336867                                | 5.776710936                   |
| 7318.093976                                      | 595.5771084                                 | 0.702307852                         | 0.003657051                                | 6.217030233                   |
| 130862.2256                                      | 50.15641026                                 | 0.666793932                         | 0.054365122                                | 4.987023023                   |
| 3729.305785                                      | 425.5247934                                 | 0.715776706                         | 0.008632131                                | 5.868490883                   |
| 12215.23091                                      | 411.3641208                                 | 0.731297982                         | 0.007403885                                | 6.035961562                   |
| 6080.620939                                      | 263.4151625                                 | 0.680273092                         | 0.015278261                                | 5.856552565                   |
| 102533.8104                                      | 1530.558442                                 | 0.710570539                         | 0.001592229                                | 6.324222509                   |
| 10699.11571                                      | 619.75                                      | 0.742070951                         | 0.004435516                                | 6.129070842                   |
| 18735.54325                                      | 1188.777393                                 | 0.71418966                          | 0.002682442                                | 6.68363959                    |
| 217332.5834                                      | 486.64753                                   | 0.694829877                         | 0.003982607                                | 5.948535847                   |
| 51216.54274                                      | 911.2404448                                 | 0.742632557                         | 0.002238726                                | 6.247645297                   |
| 343330.7479                                      | 322.0942912                                 | 0.659442803                         | 0.004804717                                | 5.954726629                   |
| 257621.8763                                      | 3036.201075                                 | 0.753581791                         | 0.001460105                                | 6.181492994                   |
| 1555.261538                                      | 309.3230769                                 | 0.79234816                          | 0.025750833                                | 5.091147428                   |
| 1947.023585                                      | 532.3962264                                 | 0.75249869                          | 0.010665948                                | 5.909310788                   |
| 83812.85843                                      | 329.8253012                                 | 0.703020306                         | 0.006137978                                | 5.768251578                   |
| 83460.06803                                      | 1048.387705                                 | 0.735942389                         | 0.002227755                                | 6.408000539                   |
| 208994.3291                                      | 1025.641673                                 | 0.696660106                         | 0.00196465                                 | 6.193675193                   |
| 3866.015424                                      | 413.3753213                                 | 0.671787025                         | 0.007919587                                | 6.284483795                   |
| 25624.24654                                      | 539.1820276                                 | 0.745480482                         | 0.00787025                                 | 5.838820338                   |
| 19660.37309                                      | 677.2293578                                 | 0.746459865                         | 0.00497473                                 | 5.930988604                   |
| 24410.16508                                      | 284.7111111                                 | 0.693673416                         | 0.012479855                                | 5.779221891                   |
| 44055.30088                                      | 445.4053097                                 | 0.715092474                         | 0.004921817                                | 5.788595645                   |
| 8685.29108                                       | 419.1502347                                 | 0.693485877                         | 0.006435375                                | 5.936279913                   |
| 8976.019837                                      | 450.7012835                                 | 0.719669406                         | 0.005147606                                | 6.066526762                   |
| 6968.790554                                      | 337.5533881                                 | 0.702588048                         | 0.006828072                                | 6.026467008                   |
| 105378.1459                                      | 794.5324934                                 | 0.715163987                         | 0.002212926                                | 6.035286434                   |
| 6907.866171                                      | 381.1672862                                 | 0.727598114                         | 0.009189718                                | 5.89438889                    |
| 2850.574468                                      | 89.61702128                                 | 0.620307143                         | 0.048366452                                | 4.910659862                   |
| 4657.612069                                      | 394.6551724                                 | 0.664206078                         | 0.017276667                                | 5.981853128                   |
| 103396.0461                                      | 401.5494966                                 | 0.711307795                         | 0.004482452                                | 5.975171837                   |
| 19615.64706                                      | 504.1919505                                 | 0.685521923                         | 0.007558435                                | 6.067976677                   |
| 18625.78767                                      | 1112.549456                                 | 0.730265734                         | 0.00186054                                 | 6.399954588                   |
| 5466.265018                                      | 505.3109541                                 | 0.693797651                         | 0.007516305                                | 6.051223458                   |
| 986758.1155                                      | 538.8844847                                 | 0.725769482                         | 0.003316554                                | 6.044300257                   |
| 9718.959524                                      | 434.5333333                                 | 0.752750985                         | 0.006886126                                | 5.74732399                    |
| 60139.54427                                      | 438.7578125                                 | 0.681340068                         | 0.004469339                                | 6.022674774                   |
| 27507.86261                                      | 893.8156522                                 | 0.747141854                         | 0.003822803                                | 6.199693524                   |
| 78300.10965                                      | 406.8991228                                 | 0.679357112                         | 0.007768704                                | 5.65450348                    |
| 85625.29282                                      | 199.9060773                                 | 0.696914063                         | 0.012006513                                | 4.880418627                   |
| 100891.3767                                      | 328.0371622                                 | 0.702971384                         | 0.006512729                                | 5.607290074                   |
| 166696.052                                       | 977.4072379                                 | 0.751166682                         | 0.002065961                                | 6.235921206                   |
| 73848.86791                                      | 577.2225177                                 | 0.690215707                         | 0.003290452                                | 6.127233447                   |
| 2034583.454                                      | 1076.02243                                  | 0.683119665                         | 0.002877063                                | 5.750938326                   |
| 4307.625                                         | 113.5                                       | 0.64019792                          | 0.03585622                                 | 4.966578664                   |
| 68503.59719                                      | 237.006012                                  | 0.740980401                         | 0.011090871                                | 5.494387928                   |
| 2257.37963                                       | 327.0231481                                 | 0.719243143                         | 0.01067301                                 | 5.662926115                   |
| 108166.2184                                      | 401.7885965                                 | 0.711855134                         | 0.005672211                                | 6.008953573                   |
| 6330.984925                                      | 295.3266332                                 | 0.721767214                         | 0.0107999                                  | 5.485359154                   |
| 15402.73346                                      | 979.2743191                                 | 0.735402458                         | 0.002298006                                | 6.19611015                    |
| 75105.69134                                      | 367.6841155                                 | 0.728347617                         | 0.005432688                                | 5.935420367                   |
| 51080.18797                                      | 416.1203008                                 | 0.714631633                         | 0.008420118                                | 5.793986865                   |
| 465419.0637                                      | 120.5444566                                 | 0.681899424                         | 0.016258419                                | 5.397953418                   |
| 658313.9677                                      | 194.888189                                  | 0.686696438                         | 0.008498412                                | 5.749669645                   |
| 1297444.999                                      | 1172.720603                                 | 0.732169675                         | 0.001460161                                | 6.186883998                   |
| 4763.9806                                        | 497.8624339                                 | 0.71240438                          | 0.007324295                                | 6.147608219                   |
| 3469.457597                                      | 341.6890459                                 | 0.694831578                         | 0.008641381                                | 6.018931407                   |
| 2584.207358                                      | 239.083612                                  | 0.697750455                         | 0.016602554                                | 5.833133297                   |
| 47884.7592                                       | 484.3328221                                 | 0.68944987                          | 0.004285567                                | 5.953576917                   |
| 34819.32562                                      | 745.0516975                                 | 0.72685785                          | 0.00302008                                 | 6.4794791                     |
| 20351.04348                                      | 369.7639752                                 | 0.704258385                         | 0.009676342                                | 5.301145678                   |
| 7408.679468                                      | 544.3249631                                 | 0.733133652                         | 0.004187395                                | 5.973857146                   |
| 7601.62621                                       | 671.7211104                                 | 0.766433406                         | 0.003863581                                | 6.178924845                   |
| 5597.666667                                      | 82                                          | 0.555057873                         | 0.051212857                                | 4.389898095                   |
| 49273.64063                                      | 198.5427083                                 | 0.680705563                         | 0.009182962                                | 5.713354491                   |
| 29721.07851                                      | 449.2414132                                 | 0.677238728                         | 0.003701983                                | 6.220763822                   |
| 15277.22709                                      | 174.9282869                                 | 0.697148248                         | 0.017503117                                | 5.517843672                   |
| 8127.619863                                      | 1128.073059                                 | 0.734182424                         | 0.002729342                                | 6.480814678                   |
| 19341.24096                                      | 944.6746988                                 | 0.788526322                         | 0.013483498                                | 5.177952125                   |
| 1023.836735                                      | 109.6938776                                 | 0.658641167                         | 0.04477288                                 | 4.864610099                   |
| 381780.026                                       | 1092.293863                                 | 0.72211227                          | 0.001815787                                | 6.046057079                   |
| 6068.974299                                      | 714.6939252                                 | 0.790504781                         | 0.007496208                                | 5.987100479                   |
| 5500.219469                                      | 778.5221239                                 | 0.732387195                         | 0.00362615                                 | 6.135921603                   |
| 496231.1195                                      | 913.0724832                                 | 0.739226801                         | 0.002269451                                | 6.139140763                   |
| 828409.3496                                      | 1297.285563                                 | 0.719282419                         | 0.00144704                                 | 6.129891042                   |
| 1570.873134                                      | 144.9104478                                 | 0.736267018                         | 0.02455083                                 | 5.268760647                   |
| 10173.90671                                      | 848.2324059                                 | 0.732010763                         | 0.003256358                                | 6.115879005                   |
| 2822.5625                                        | 105.375                                     | 0.709700734                         | 0.037479099                                | 4.589661719                   |
| 18389.16964                                      | 229.4821429                                 | 0.727988988                         | 0.020796593                                | 5.293407212                   |
| 72038.89333                                      | 332.8177778                                 | 0.712879126                         | 0.008813181                                | 5.45764015                    |

| wavelet.HHH_glszm_SmallAreaLowGrayLevelEmphasis | wavelet.HHH_ngtdm_Coarseness | wavelet.HHH_ngtdm_Complexity | wavelet.HHH_ngtdm_Strength | wavelet.HHH_ngtdm_Busyness | wavelet.HHH_ngtdm_Contrast |
|-------------------------------------------------|------------------------------|------------------------------|----------------------------|----------------------------|----------------------------|
| 0.007137681                                     | 0.010270453                  | 2.238478664                  | 4.408627986                | 0.099340842                | 0.000141415                |
| 0.00653972                                      | 0.003719155                  | 0.686146593                  | 1.524069652                | 0.31253925                 | 3.61E-05                   |
| 0.006730795                                     | 0.013995076                  | 4.664656708                  | 5.176348513                | 0.096826175                | 0.000606709                |
| 0.00494541                                      | 0.002709699                  | 0.613435332                  | 0.995552809                | 0.452866352                | 3.35E-05                   |
| 0.04025191                                      | 0.0160105                    | 0.782514596                  | 1.190244937                | 0.455340449                | 0.000522621                |
| 0.010552889                                     | 0.010367174                  | 1.291531319                  | 2.248635321                | 0.184641885                | 0.000165942                |
| 0.006869642                                     | 0.017869566                  | 5.806655314                  | 7.142227206                | 0.059070231                | 0.000705689                |
| 0.005744033                                     | 0.006482097                  | 1.583619682                  | 1.813816812                | 0.236503461                | 0.000190379                |
| 0.00430565                                      | 0.003326451                  | 0.564619645                  | 1.528579502                | 0.356138601                | 2.87E-05                   |
| 0.002867938                                     | 0.002183077                  | 0.632636914                  | 1.098387397                | 0.427443508                | 2.58E-05                   |
| 0.003920889                                     | 0.007603584                  | 3.048211868                  | 3.969518898                | 0.10831823                 | 0.000197046                |
| 0.003128655                                     | 0.004982556                  | 4.618949801                  | 5.412021743                | 0.08173917                 | 0.000105998                |
| 0.002257096                                     | 0.003133806                  | 1.157950768                  | 2.301228139                | 0.176611543                | 3.08E-05                   |
| 0.003922067                                     | 0.00630509                   | 2.79480574                   | 5.048868538                | 0.086984773                | 8.46E-05                   |
| 0.017224539                                     | 0.006968419                  | 0.324526516                  | 0.779972062                | 0.588875247                | 7.91E-05                   |
| 0.006065425                                     | 0.000975728                  | 0.052516205                  | 0.319213793                | 1.775466812                | 2.26E-06                   |
| 0.01018209                                      | 0.008609563                  | 0.693368787                  | 1.732324848                | 0.260292035                | 8.40E-05                   |
| 0.004017666                                     | 0.003088261                  | 1.024986905                  | 2.172751307                | 0.235613742                | 2.62E-05                   |
| 0.007428631                                     | 0.011392754                  | 1.211958503                  | 1.8737884                  | 0.198866028                | 0.000296354                |
| 0.004609606                                     | 0.002650273                  | 0.386408709                  | 0.919653497                | 0.482677771                | 2.23E-05                   |
| 0.005568907                                     | 0.001385099                  | 0.121245614                  | 0.366929788                | 1.266109038                | 7.01E-06                   |
| 0.003057633                                     | 0.003826406                  | 1.69189029                   | 2.341474766                | 0.201193811                | 6.36E-05                   |
| 0.039730028                                     | 0.002294321                  | 0.030917128                  | 0.131988219                | 3.894041314                | 1.22E-05                   |
| 0.007752154                                     | 0.012915474                  | 3.673173153                  | 4.438584785                | 0.101051009                | 0.0003771                  |
| 0.006542101                                     | 0.005770816                  | 1.955048348                  | 2.951179696                | 0.17571031                 | 0.000100376                |
| 0.012463269                                     | 0.008923217                  | 1.526835227                  | 2.174051364                | 0.220600504                | 0.000223085                |
| 0.001377352                                     | 0.001948655                  | 1.488355125                  | 2.501274848                | 0.172493673                | 2.26E-05                   |
| 0.003750044                                     | 0.004289538                  | 2.291789372                  | 2.44708802                 | 0.192455563                | 0.000135741                |
| 0.002301876                                     | 0.003453388                  | 4.209903055                  | 3.0568605                  | 0.133123149                | 0.000178171                |
| 0.003248608                                     | 0.003052365                  | 0.43809781                   | 1.320113503                | 0.311979951                | 1.86E-05                   |
| 0.001896983                                     | 0.002117596                  | 1.12675682                   | 1.473951413                | 0.262886929                | 3.92E-05                   |
| 0.003514105                                     | 0.00117155                   | 0.109718692                  | 0.314049677                | 1.254848345                | 7.63E-06                   |
| 0.001358897                                     | 0.003826551                  | 3.204100787                  | 6.393055763                | 0.056904294                | 4.72E-05                   |
| 0.025058275                                     | 0.05196229                   | 12.13143831                  | 12.86828368                | 0.043134223                | 0.004109141                |
| 0.0089237                                       | 0.016650703                  | 11.92192842                  | 8.507490215                | 0.86212056                 | 0.0012518                  |
| 0.005009134                                     | 0.003620251                  | 0.507276569                  | 1.167829301                | 0.362772931                | 2.82E-05                   |
| 0.001935308                                     | 0.002367496                  | 1.72383635                   | 2.450152935                | 0.182022834                | 3.64E-05                   |
| 0.001626845                                     | 0.002289029                  | 0.837984515                  | 1.837912419                | 0.207609592                | 1.69E-05                   |
| 0.006508552                                     | 0.007679953                  | 2.914628164                  | 3.661886826                | 0.147783911                | 0.000198396                |
| 0.007285449                                     | 0.006976857                  | 1.816315178                  | 3.073699533                | 0.127801376                | 9.91E-05                   |
| 0.004522669                                     | 0.00455324                   | 1.269997422                  | 2.09553989                 | 0.183092746                | 7.39E-05                   |
| 0.01118964                                      | 0.007039434                  | 0.749007586                  | 1.602120106                | 0.257845449                | 8.90E-05                   |
| 0.004178545                                     | 0.004246615                  | 0.712729906                  | 1.547336621                | 0.259515488                | 3.88E-05                   |
| 0.005556217                                     | 0.006497409                  | 1.294900393                  | 2.17901849                 | 0.192830246                | 0.000101993                |
| 0.004378163                                     | 0.003425755                  | 1.169625441                  | 1.647303486                | 0.285670715                | 5.69E-05                   |
| 0.005687814                                     | 0.002893691                  | 0.706353659                  | 1.155959142                | 0.444081924                | 4.03E-05                   |
| 0.001799662                                     | 0.001618321                  | 0.581790432                  | 1.316830353                | 0.349044441                | 1.09E-05                   |
| 0.008241264                                     | 0.011303773                  | 2.593959753                  | 3.656828656                | 0.116566848                | 0.000255205                |
| 0.04238502                                      | 0.048818486                  | 1.80973048                   | 3.884336844                | 0.111218066                | 0.000972564                |
| 0.016147721                                     | 0.011863644                  | 2.961961188                  | 3.50415876                 | 0.134068635                | 0.000412132                |
| 0.003626414                                     | 0.002181343                  | 0.394844273                  | 0.915152963                | 0.463458623                | 1.53E-05                   |
| 0.006753902                                     | 0.008345643                  | 2.588553239                  | 4.474557459                | 0.104985405                | 0.000121465                |
| 0.001562131                                     | 0.001852559                  | 1.455402069                  | 2.022969867                | 0.218053484                | 2.79E-05                   |
| 0.006725811                                     | 0.012075316                  | 3.171514373                  | 4.700875835                | 0.08821482                 | 0.000274065                |
| 0.002682759                                     | 0.001227986                  | 0.286896207                  | 1.077188471                | 0.507852585                | 4.22E-06                   |
| 0.005814743                                     | 0.007805779                  | 2.29869493                   | 3.181323871                | 0.148172094                | 0.000163186                |
| 0.003627618                                     | 0.003039599                  | 0.630934516                  | 1.260467114                | 0.338142975                | 2.98E-05                   |
| 0.003382184                                     | 0.004924465                  | 3.933570349                  | 5.173889673                | 0.093705777                | 0.000102911                |
| 0.006836714                                     | 0.009014457                  | 0.904527384                  | 2.659634254                | 0.151444008                | 8.03E-05                   |
| 0.010138127                                     | 0.007209642                  | 0.28396741                   | 1.056983789                | 0.427467141                | 5.10E-05                   |
| 0.00540657                                      | 0.003194679                  | 0.380534317                  | 1.11833991                 | 0.450385199                | 2.15E-05                   |
| 0.001778973                                     | 0.00135198                   | 0.782384189                  | 1.419751834                | 0.316432418                | 1.32E-05                   |
| 0.002694049                                     | 0.002385334                  | 0.548596027                  | 1.183650797                | 0.333873877                | 1.98E-05                   |
| 0.002565406                                     | 0.002651036                  | 0.30133407                   | 1.666110064                | 0.225845437                | 7.84E-06                   |
| 0.018436212                                     | 0.028790142                  | 1.288612135                  | 2.508423938                | 0.191730313                | 0.000578457                |
| 0.00962713                                      | 0.004847745                  | 0.409961563                  | 1.102925686                | 0.398557781                | 3.94E-05                   |
| 0.009598404                                     | 0.014489808                  | 3.18457814                   | 3.446680053                | 0.132993346                | 0.00065235                 |
| 0.004739223                                     | 0.002419628                  | 0.432396752                  | 0.951392401                | 0.425089212                | 1.95E-05                   |
| 0.009582655                                     | 0.013751071                  | 1.951137752                  | 2.787497947                | 0.147431897                | 0.000326769                |
| 0.001995375                                     | 0.003426202                  | 1.776413601                  | 2.465785842                | 0.155222384                | 5.88E-05                   |
| 0.004517719                                     | 0.002459035                  | 0.500779292                  | 1.081891764                | 0.425423089                | 1.96E-05                   |
| 0.007599722                                     | 0.006530695                  | 1.254681444                  | 2.810698458                | 0.174772573                | 7.24E-05                   |
| 0.012521734                                     | 0.001330623                  | 0.042723134                  | 0.173744962                | 2.617412602                | 5.73E-06                   |
| 0.006460639                                     | 0.001609963                  | 0.086520311                  | 0.418507964                | 1.567921413                | 2.88E-06                   |
| 0.001210734                                     | 0.000812743                  | 0.468982029                  | 1.395136314                | 0.387157519                | 3.27E-06                   |
| 0.006619867                                     | 0.005939172                  | 2.318235526                  | 2.960783735                | 0.161034732                | 0.000132509                |
| 0.007390138                                     | 0.00551014                   | 1.506960088                  | 1.863113747                | 0.276677493                | 0.000151769                |
| 0.01457852                                      | 0.009871135                  | 2.057215511                  | 2.675615222                | 0.199330174                | 0.000255066                |
| 0.002370628                                     | 0.003841759                  | 0.744396926                  | 1.417106149                | 0.26982831                 | 4.48E-05                   |
| 0.002507755                                     | 0.002322656                  | 1.3878758                    | 1.474033109                | 0.280552601                | 6.69E-05                   |
| 0.008705465                                     | 0.012941368                  | 0.875335795                  | 2.173640157                | 0.166002617                | 0.000194934                |
| 0.00358349                                      | 0.0048615                    | 1.518799799                  | 1.954503075                | 0.208434702                | 0.000106529                |
| 0.003405898                                     | 0.002351607                  | 1.902607594                  | 2.231893276                | 0.245836764                | 4.59E-05                   |
| 0.019873262                                     | 0.03858415                   | 0.564524242                  | 1.651880407                | 0.274147926                | 0.000790389                |
| 0.007148522                                     | 0.001980411                  | 0.167829019                  | 0.414067073                | 1.092218529                | 1.50E-05                   |
| 0.002824686                                     | 0.001239946                  | 0.358067964                  | 0.707726248                | 0.738721532                | 1.19E-05                   |
| 0.015048816                                     | 0.008021198                  | 0.63483741                   | 1.350647282                | 0.37304996                 | 0.00011443                 |
| 0.002435609                                     | 0.004073109                  | 0.4066078958                 | 3.185992157                | 0.125632788                | 0.000165517                |
| 0.013231475                                     | 0.036988077                  | 7.406910576                  | 13.1824358                 | 0.027757432                | 0.001583808                |
| 0.041455534                                     | 0.064896292                  | 2.710001463                  | 5.22642339                 | 0.075676617                | 0.001426065                |
| 0.001533187                                     | 0.001955006                  | 0.591314649                  | 1.537757078                | 0.241549281                | 1.23E-05                   |
| 0.006937847                                     | 0.008781595                  | 6.466701973                  | 5.158709745                | 0.087764853                | 0.000413452                |
| 0.003217063                                     | 0.005943195                  | 3.371429189                  | 3.36118609                 | 0.12904201                 | 0.000192831                |
| 0.001919759                                     | 0.001924783                  | 0.900274155                  | 2.150946714                | 0.216652386                | 1.23E-05                   |
| 0.001211065                                     | 0.001361141                  | 0.589072266                  | 1.874629588                | 0.247279949                | 5.60E-06                   |
| 0.021232891                                     | 0.023054678                  | 2.023054678                  | 2.616237168                | 0.198314146                | 0.00097084                 |
| 0.002879638                                     | 0.005810118                  | 2.833441959                  | 4.360951476                | 0.0966679                  | 9.00E-05                   |
| 0.032974691                                     | 0.049854388                  | 1.452864192                  | 3.2971334                  | 0.136913708                | 0.001121634                |
| 0.019379429                                     | 0.018028426                  | 1.467185362                  | 3.412276032                | 0.122649422                | 0.000223805                |
| 0.007780739                                     | 0.009337388                  | 0.804368732                  | 2.279839092                | 0.160821453                | 6.65E-05                   |

| wavelet.HHL_gldm_GrayLevelVariance | wavelet.HHL_gldm_HighGrayLevelEmphasis | wavelet.HHL_gldm_GrayLevelNonUniformityNormalized | wavelet.HHL_gldm_DependenceEntropy | wavelet.HHL_gldm_DependenceNonUniformity |
|------------------------------------|----------------------------------------|---------------------------------------------------|------------------------------------|------------------------------------------|
| 38.18281384                        | 599.3895184                            | 0.053760162                                       | 6.345836092                        | 188.8866856                              |
| 12.74136732                        | 354.0211844                            | 0.104077976                                       | 6.322142158                        | 310.3317285                              |
| 27.35055427                        | 341.2281106                            | 0.05699845                                        | 6.112923028                        | 119.4239631                              |
| 40.83252033                        | 1926.962808                            | 0.058063652                                       | 6.602380669                        | 659.9480076                              |
| 7.636315671                        | 84.18662953                            | 0.104103786                                       | 5.74253905                         | 66.21448468                              |
| 13.43800565                        | 196.0451011                            | 0.08209235                                        | 5.967053582                        | 135.9175379                              |
| 28.59204536                        | 363.6884273                            | 0.059655364                                       | 5.921647276                        | 98.08011869                              |
| 35.61161509                        | 460.6626747                            | 0.052581464                                       | 6.300871317                        | 272.8622754                              |
| 24.02848013                        | 675.1005291                            | 0.067914538                                       | 6.341187963                        | 458.4309454                              |
| 23.47182703                        | 526.4154293                            | 0.068343307                                       | 6.354793603                        | 701.3182699                              |
| 18.29578216                        | 363.1680774                            | 0.070912332                                       | 6.059498022                        | 197.2926239                              |
| 25.15572429                        | 490.8940621                            | 0.064779149                                       | 6.398369744                        | 335.6491228                              |
| 32.60279588                        | 2101.756027                            | 0.066025243                                       | 6.498304807                        | 445.8302797                              |
| 9.541512124                        | 192.0330948                            | 0.09803156                                        | 6.041416647                        | 191.5330948                              |
| 19.71427401                        | 399.6860593                            | 0.069362024                                       | 6.141900507                        | 222.528276                               |
| 20.3140104                         | 778.3503671                            | 0.145797701                                       | 6.388920324                        | 782.5206564                              |
| 7.646045599                        | 140.9856734                            | 0.110319291                                       | 5.827195612                        | 111.7421203                              |
| 19.04369717                        | 621.0810463                            | 0.085494088                                       | 6.506280631                        | 377.7890223                              |
| 22.56239298                        | 369.7250859                            | 0.070960428                                       | 6.15426204                         | 130.8694158                              |
| 11.86572501                        | 251.767226                             | 0.106950506                                       | 6.247239859                        | 423.9053909                              |
| 16.86329934                        | 439.9040965                            | 0.094361429                                       | 6.454090595                        | 826.4977029                              |
| 23.34248208                        | 294.2319767                            | 0.062347215                                       | 6.306406993                        | 416.8523256                              |
| 19.64660949                        | 398.0922739                            | 0.078160738                                       | 6.352157245                        | 550.5928231                              |
| 55.19889696                        | 557.5738046                            | 0.045249632                                       | 6.27466648                         | 153.6902287                              |
| 26.98506294                        | 1077.035714                            | 0.070691825                                       | 6.302139153                        | 277.2043189                              |
| 21.26300567                        | 402.9755043                            | 0.069662567                                       | 6.133415517                        | 168.1066287                              |
| 20.7412247                         | 725.0877092                            | 0.075385852                                       | 6.405610886                        | 689.7409117                              |
| 20.73300709                        | 364.3140265                            | 0.069570862                                       | 6.437875629                        | 292.1653873                              |
| 52.93188325                        | 736.9988669                            | 0.044117554                                       | 6.813535033                        | 464.1705382                              |
| 9.744859763                        | 250.1534225                            | 0.129127898                                       | 6.24094386                         | 324.1620771                              |
| 18.99971829                        | 283.2283737                            | 0.070581645                                       | 6.225412448                        | 739.0993111                              |
| 9.252161815                        | 432.4804384                            | 0.128105355                                       | 6.255073412                        | 776.7841484                              |
| 24.96840886                        | 533.5563207                            | 0.064450826                                       | 6.405726179                        | 457.1869159                              |
| 22.28762944                        | 233.375                                | 0.075443787                                       | 5.400838608                        | 27.38461538                              |
| 38.15904885                        | 347.2620482                            | 0.050333866                                       | 6.033726816                        | 112.1927711                              |
| 9.966831438                        | 282.200495                             | 0.101131752                                       | 6.050087175                        | 346.2326733                              |
| 22.77495551                        | 487.3121528                            | 0.069998794                                       | 6.456496151                        | 592.1479167                              |
| 14.53070924                        | 321.208706                             | 0.086179106                                       | 6.236836268                        | 624.6786038                              |
| 15.63670838                        | 194.3952096                            | 0.077944709                                       | 6.121490915                        | 171.0359281                              |
| 15.44642907                        | 224.8265014                            | 0.081211304                                       | 6.131285378                        | 215.0190658                              |
| 25.39577001                        | 534.3052917                            | 0.065033166                                       | 6.451527544                        | 313.2306649                              |
| 10.86807992                        | 195.4344176                            | 0.094446322                                       | 6.024509533                        | 171.8163694                              |
| 11.12644372                        | 284.1406821                            | 0.094335508                                       | 6.015932378                        | 303.4920828                              |
| 15.66024985                        | 404.6156098                            | 0.083250446                                       | 6.063432376                        | 212.5414634                              |
| 34.24564828                        | 789.9685836                            | 0.058984645                                       | 6.438884761                        | 460.0053248                              |
| 14.50757617                        | 353.0807899                            | 0.084371747                                       | 6.015752667                        | 493.4631957                              |
| 44.77111381                        | 1769.843413                            | 0.056056359                                       | 6.60994325                         | 1059.58181                               |
| 21.11183357                        | 263.787307                             | 0.067371995                                       | 6.158343976                        | 131.2572899                              |
| 17.94876364                        | 151.4029851                            | 0.073067498                                       | 5.542304356                        | 33.6119403                               |
| 33.84642665                        | 248.3480885                            | 0.054285471                                       | 6.093967548                        | 137.8812877                              |
| 11.01998528                        | 284.8238902                            | 0.103615763                                       | 6.185847178                        | 561.0478972                              |
| 15.57492371                        | 286.0918984                            | 0.079536034                                       | 6.034062366                        | 178.4607013                              |
| 22.43213646                        | 444.0191409                            | 0.067316044                                       | 6.356466795                        | 845.4637529                              |
| 22.45823277                        | 263.9424704                            | 0.067020536                                       | 6.11916185                         | 139.3113667                              |
| 10.65585713                        | 470.1643416                            | 0.141518206                                       | 6.179436785                        | 813.1695539                              |
| 22.9818428                         | 207.9294653                            | 0.065685098                                       | 6.178520481                        | 217.7872582                              |
| 12.73780251                        | 357.2608299                            | 0.089874947                                       | 6.160423617                        | 389.6420429                              |
| 16.39509549                        | 227.1500387                            | 0.077751639                                       | 6.145910842                        | 269.7703016                              |
| 21.55526595                        | 406.0331695                            | 0.0846217                                         | 6.354017787                        | 136.8697789                              |
| 17.36464213                        | 773.645857                             | 0.094896549                                       | 6.142601736                        | 148.5868331                              |
| 27.73084662                        | 534.267579                             | 0.065816126                                       | 6.454884109                        | 470.9726286                              |
| 30.62786311                        | 742.7323841                            | 0.060471099                                       | 6.503005229                        | 1327.472435                              |
| 14.74594956                        | 315.268932                             | 0.100285921                                       | 6.223646611                        | 542.5216828                              |
| 5.133976754                        | 214.0428415                            | 0.187195954                                       | 5.963614965                        | 249.1120469                              |
| 14.81862006                        | 195.640553                             | 0.08458451                                        | 5.601860825                        | 48.50230415                              |
| 30.09414261                        | 630.6123632                            | 0.070156053                                       | 6.424332519                        | 334.3547972                              |
| 28.57084697                        | 446.2235303                            | 0.05521915                                        | 6.075856442                        | 111.3502538                              |
| 12.22232154                        | 318.0400375                            | 0.099057032                                       | 6.155749298                        | 555.900219                               |
| 10.79505419                        | 102.5852018                            | 0.093607352                                       | 5.765555296                        | 90.94618834                              |
| 29.75082645                        | 749.1427151                            | 0.05689172                                        | 6.396330415                        | 523.5539533                              |
| 8.094221672                        | 219.0029605                            | 0.119975762                                       | 6.082245337                        | 438.6499421                              |
| 7.954583291                        | 165.1248893                            | 0.112437149                                       | 6.000456097                        | 183.7564216                              |
| 9.672942087                        | 614.254257                             | 0.129901861                                       | 6.173583268                        | 660.25                                   |
| 13.14767617                        | 661.9784098                            | 0.12187846                                        | 6.352557193                        | 890.6590232                              |
| 25.86775428                        | 959.4298475                            | 0.075784409                                       | 6.555260074                        | 1775.688453                              |
| 20.34430682                        | 401.6084229                            | 0.069219627                                       | 6.196824568                        | 261.0949821                              |
| 25.61551476                        | 454.1092211                            | 0.063739441                                       | 6.365323069                        | 257.7699194                              |
| 20.69373824                        | 263.2360656                            | 0.067417361                                       | 6.161425333                        | 138.547541                               |
| 17.31021668                        | 360.7358277                            | 0.081093397                                       | 6.224546775                        | 347.462585                               |
| 28.55138834                        | 783.256149                             | 0.061099426                                       | 6.520883308                        | 662.1693605                              |
| 25.08644731                        | 299.6329365                            | 0.06856261                                        | 6.079576449                        | 119.7420635                              |
| 29.95843141                        | 451.3251305                            | 0.056014049                                       | 6.226750961                        | 390.7986577                              |
| 41.07127558                        | 761.8553009                            | 0.050168153                                       | 6.51826416                         | 817.7808023                              |
| 24.65560048                        | 376.2827586                            | 0.08451843                                        | 5.481508319                        | 33.34482759                              |
| 18.55136235                        | 438.6018873                            | 0.078855586                                       | 6.294098741                        | 702.8283692                              |
| 18.07695213                        | 482.4731556                            | 0.074986354                                       | 6.387811315                        | 1102.41198                               |
| 24.84434579                        | 573.1143959                            | 0.06621685                                        | 6.184067009                        | 175.159383                               |
| 34.95913446                        | 461.5987111                            | 0.050450367                                       | 6.333031319                        | 466.1572165                              |
| 13.00767416                        | 153.2295082                            | 0.110394458                                       | 5.450336777                        | 35.29508197                              |
| 46.85569161                        | 306.2190476                            | 0.052335601                                       | 5.413015132                        | 39.03809524                              |
| 12.59316995                        | 283.810566                             | 0.098605403                                       | 6.291867503                        | 649.4397484                              |
| 23.0783892                         | 394.9235127                            | 0.063935992                                       | 6.132559673                        | 177.8526912                              |
| 38.65586548                        | 583.8463796                            | 0.051623577                                       | 6.405333496                        | 283.4637965                              |
| 14.32200196                        | 390.7484108                            | 0.100106766                                       | 6.335430971                        | 626.593643                               |
| 9.168263253                        | 430.2802274                            | 0.117152377                                       | 6.144779753                        | 819.0830176                              |
| 70.50208564                        | 942.5019763                            | 0.03722914                                        | 6.055387983                        | 107.3557312                              |
| 23.52240886                        | 497.9810855                            | 0.071091586                                       | 6.394184199                        | 256.6661184                              |
| 23.73917642                        | 214.0894309                            | 0.073567321                                       | 5.321397868                        | 38.30081301                              |
| 60.28625532                        | 884.3852243                            | 0.058792406                                       | 6.178418015                        | 98.3878628                               |
| 22.69641566                        | 781.5043371                            | 0.08183813                                        | 6.276855725                        | 156.2688971                              |

| wavelet.HHL_gldm_GrayLevelNonUniformity | wavelet.HHL_gldm_SmallDependenceEmphasis | wavelet.HHL_gldm_DependenceNonUniformityNormalized | wavelet.HHL_gldm_DependenceVariance |
|-----------------------------------------|------------------------------------------|----------------------------------------------------|-------------------------------------|
| 37.95467422                             | 0.462601383                              | 0.26754488                                         | 1.999911724                         |
| 216.1699567                             | 0.285981043                              | 0.149413447                                        | 7.974842423                         |
| 24.73732719                             | 0.484963818                              | 0.275170422                                        | 1.380513496                         |
| 152.997723                              | 0.464937919                              | 0.250454652                                        | 4.195078512                         |
| 37.37325905                             | 0.276717309                              | 0.184441462                                        | 2.913586952                         |
| 52.78538103                             | 0.367437605                              | 0.211380364                                        | 2.294483721                         |
| 20.10385757                             | 0.491528526                              | 0.291038928                                        | 1.367468235                         |
| 52.68662675                             | 0.457162438                              | 0.27231764                                         | 1.454563926                         |
| 141.1943242                             | 0.386502112                              | 0.220505289                                        | 2.263788623                         |
| 211.7275662                             | 0.410145162                              | 0.22637775                                         | 2.688738564                         |
| 58.64449819                             | 0.386416622                              | 0.238564237                                        | 1.812524399                         |
| 96.00269906                             | 0.400097859                              | 0.226483889                                        | 2.39842027                          |
| 136.9363549                             | 0.393754261                              | 0.214961562                                        | 2.689506579                         |
| 109.5992844                             | 0.286902622                              | 0.171317616                                        | 3.328298361                         |
| 63.18880351                             | 0.438448691                              | 0.244328075                                        | 2.082137938                         |
| 1012.856629                             | 0.256793256                              | 0.112641522                                        | 10.99939133                         |
| 77.00286533                             | 0.274530037                              | 0.160088998                                        | 4.402820995                         |
| 199.3722127                             | 0.314823391                              | 0.162002154                                        | 4.906684977                         |
| 41.29896907                             | 0.367384771                              | 0.224861539                                        | 2.03885169                          |
| 299.5683684                             | 0.298284857                              | 0.151340732                                        | 6.601331115                         |
| 492.9441041                             | 0.335411692                              | 0.158211658                                        | 7.536762093                         |
| 107.2372093                             | 0.418953547                              | 0.242356003                                        | 1.878236885                         |
| 213.4569755                             | 0.38250597                               | 0.201608504                                        | 4.097783414                         |
| 21.76507277                             | 0.547803459                              | 0.319522305                                        | 1.440225449                         |
| 85.11295681                             | 0.439829545                              | 0.230236145                                        | 3.460615777                         |
| 48.34582133                             | 0.444284665                              | 0.242228571                                        | 2.63300916                          |
| 261.287363                              | 0.364690633                              | 0.199001994                                        | 3.349542452                         |
| 99.69504536                             | 0.385578854                              | 0.203883732                                        | 3.525929771                         |
| 73.101983                               | 0.477390082                              | 0.262986141                                        | 1.960720654                         |
| 328.2431157                             | 0.264780197                              | 0.127522454                                        | 11.93653683                         |
| 224.37905                               | 0.393997609                              | 0.232492328                                        | 2.015648264                         |
| 759.6647555                             | 0.26215223                               | 0.130992268                                        | 8.638528874                         |
| 131.0285293                             | 0.401315144                              | 0.22488289                                         | 2.542363835                         |
| 7.846153846                             | 0.459620726                              | 0.263313609                                        | 1.600591716                         |
| 16.71084337                             | 0.554856091                              | 0.337930033                                        | 1.062309479                         |
| 204.2861386                             | 0.291623265                              | 0.171402313                                        | 3.838421723                         |
| 201.5965278                             | 0.386381339                              | 0.205606916                                        | 3.369861111                         |
| 289.0447227                             | 0.348055381                              | 0.186248302                                        | 4.437782351                         |
| 65.08383234                             | 0.351796544                              | 0.204833447                                        | 2.467108896                         |
| 85.19065777                             | 0.359193069                              | 0.204975277                                        | 2.883932312                         |
| 95.85888738                             | 0.397633126                              | 0.212503843                                        | 3.233268099                         |
| 90.00734523                             | 0.327191582                              | 0.180289999                                        | 3.365679045                         |
| 154.8989038                             | 0.31310809                               | 0.184830745                                        | 3.163162182                         |
| 85.33170732                             | 0.362056941                              | 0.207357525                                        | 2.504743367                         |
| 110.7731629                             | 0.437825664                              | 0.244944262                                        | 2.101460666                         |
| 187.9802513                             | 0.388197659                              | 0.221482583                                        | 2.382141441                         |
| 239.1364276                             | 0.457001616                              | 0.248378296                                        | 2.617663537                         |
| 39.27787307                             | 0.415678822                              | 0.225141149                                        | 2.587709517                         |
| 9.791044776                             | 0.428577944                              | 0.250835375                                        | 1.683225663                         |
| 26.97987928                             | 0.484193181                              | 0.277427138                                        | 1.544631977                         |
| 354.7803738                             | 0.28871173                               | 0.163857447                                        | 5.080020294                         |
| 65.77629988                             | 0.377521523                              | 0.215792867                                        | 2.292840339                         |
| 257.2146035                             | 0.399215286                              | 0.221267666                                        | 2.379706468                         |
| 39.60913706                             | 0.421553938                              | 0.235721382                                        | 2.093901472                         |
| 923.1232562                             | 0.262187749                              | 0.124661897                                        | 7.570476562                         |
| 57.73720137                             | 0.443217714                              | 0.247767074                                        | 2.043362959                         |
| 197.0957592                             | 0.320414132                              | 0.17767535                                         | 3.605622416                         |
| 100.5328693                             | 0.361547234                              | 0.208639058                                        | 2.354614561                         |
| 68.88206388                             | 0.344916427                              | 0.168144691                                        | 6.214224052                         |
| 83.60385925                             | 0.322636828                              | 0.168657018                                        | 4.46654238                          |
| 139.46437                               | 0.396253528                              | 0.222261741                                        | 3.160892449                         |
| 331.2606791                             | 0.431594916                              | 0.242327936                                        | 2.195729314                         |
| 309.8834951                             | 0.352803129                              | 0.17557336                                         | 6.402844964                         |
| 511.2321494                             | 0.1943846                                | 0.091216421                                        | 12.5666749                          |
| 18.35483871                             | 0.390693765                              | 0.223512922                                        | 2.15549279                          |
| 108.9523503                             | 0.410198077                              | 0.21529607                                         | 3.101341773                         |
| 21.75634518                             | 0.484564629                              | 0.282614857                                        | 1.32362037                          |
| 316.68533                               | 0.312841905                              | 0.173881833                                        | 4.309960004                         |
| 41.74887892                             | 0.336517003                              | 0.20391522                                         | 2.57541877                          |
| 114.4092491                             | 0.45734956                               | 0.260345079                                        | 1.839986984                         |
| 364.7263158                             | 0.289734696                              | 0.144292547                                        | 6.908606302                         |
| 126.9415412                             | 0.277474536                              | 0.162760338                                        | 5.089754684                         |
| 671.3328173                             | 0.258226738                              | 0.127757353                                        | 7.860142554                         |
| 818.5357356                             | 0.278640427                              | 0.132617484                                        | 8.794258402                         |
| 695.7008715                             | 0.376922219                              | 0.193430115                                        | 4.62707743                          |
| 77.24910394                             | 0.408138201                              | 0.233956077                                        | 1.927917164                         |
| 71.19695613                             | 0.404475308                              | 0.230769847                                        | 2.077740527                         |
| 41.12459016                             | 0.402292838                              | 0.227127116                                        | 2.118828272                         |
| 143.0487528                             | 0.365069124                              | 0.196974255                                        | 3.057683013                         |
| 173.888967                              | 0.425907198                              | 0.232666676                                        | 3.379636027                         |
| 34.55555556                             | 0.44057233                               | 0.237583459                                        | 2.72915092                          |
| 75.11483967                             | 0.50846713                               | 0.291423309                                        | 1.585173841                         |
| 140.0694842                             | 0.509237854                              | 0.292901433                                        | 1.730763705                         |
| 12.25517241                             | 0.360565134                              | 0.229964328                                        | 1.587633769                         |
| 267.3992922                             | 0.382895181                              | 0.207262863                                        | 3.243826769                         |
| 410.6252739                             | 0.357405224                              | 0.201317016                                        | 3.051979526                         |
| 51.51670951                             | 0.405616441                              | 0.225140595                                        | 2.303110606                         |
| 78.29896907                             | 0.500190184                              | 0.300359031                                        | 1.307682472                         |
| 20.20218579                             | 0.374640183                              | 0.1928693                                          | 5.069963272                         |
| 5.495238095                             | 0.59370172                               | 0.371791383                                        | 1.488072562                         |
| 391.956478                              | 0.310251521                              | 0.163381069                                        | 6.639528879                         |
| 45.1388102                              | 0.429492229                              | 0.251915993                                        | 2.019902254                         |
| 52.7592955                              | 0.497928361                              | 0.277361836                                        | 1.928255483                         |
| 409.4366748                             | 0.309281214                              | 0.15320138                                         | 6.484354828                         |
| 680.1867034                             | 0.263471129                              | 0.14107527                                         | 6.343075553                         |
| 9.418972332                             | 0.647562582                              | 0.424330953                                        | 0.597103532                         |
| 86.44736842                             | 0.383667628                              | 0.211074111                                        | 4.21697271                          |
| 9.048780488                             | 0.469923216                              | 0.311388724                                        | 1.112168683                         |
| 22.2823219                              | 0.459514607                              | 0.259598583                                        | 2.017126029                         |
| 66.04337051                             | 0.390055081                              | 0.193641756                                        | 4.627919582                         |

| wavelet.HHL_gldm_LargeDependenceEmphasis | wavelet.HHL_gldm_LargeDependenceLowGrayLevelEmphasis | wavelet.HHL_gldm_SmallDependenceHighGrayLevelEmphasis | wavelet.HHL_gldm_LargeDependenceHighGrayLevelEmphasis |
|------------------------------------------|------------------------------------------------------|-------------------------------------------------------|-------------------------------------------------------|
| 7.135977337                              | 0.015660408                                          | 289.8018995                                           | 4063.814448                                           |
| 22.16129032                              | 0.067017769                                          | 104.9078827                                           | 7641.28936                                            |
| 5.97235023                               | 0.027027235                                          | 177.0424962                                           | 1857.490783                                           |
| 10.52789374                              | 0.006070822                                          | 902.7497263                                           | 20013.72941                                           |
| 12.55988858                              | 0.221147577                                          | 25.71923663                                           | 917.1114206                                           |
| 9.34214619                               | 0.060487366                                          | 77.40529163                                           | 1721.671851                                           |
| 5.694362018                              | 0.024489134                                          | 194.7716988                                           | 1872.738872                                           |
| 6.231536926                              | 0.019942543                                          | 217.9403896                                           | 2724.293413                                           |
| 8.888407888                              | 0.014919385                                          | 270.1544799                                           | 5856.075998                                           |
| 9.207876049                              | 0.019941111                                          | 224.2710886                                           | 4668.258554                                           |
| 7.831922612                              | 0.028464007                                          | 149.1478757                                           | 2697.823458                                           |
| 8.835357625                              | 0.021078949                                          | 203.4279358                                           | 4223.339406                                           |
| 9.620057859                              | 0.005234953                                          | 840.1836779                                           | 19971.17551                                           |
| 13.51341682                              | 0.081453205                                          | 57.51786146                                           | 2527.140429                                           |
| 7.750823271                              | 0.023037659                                          | 178.1741155                                           | 3088.070252                                           |
| 32.0942853                               | 0.043468482                                          | 210.9013231                                           | 24366.65611                                           |
| 16.0487106                               | 0.132074509                                          | 42.39519308                                           | 2149.137536                                           |
| 15.98542024                              | 0.028181468                                          | 205.2700757                                           | 9567.104202                                           |
| 8.64604811                               | 0.029593184                                          | 145.4564831                                           | 3134.924399                                           |
| 19.58550518                              | 0.086748002                                          | 82.08316408                                           | 4701.430918                                           |
| 20.15122511                              | 0.050003529                                          | 152.8746452                                           | 8490.07791                                            |
| 7.58255814                               | 0.034182608                                          | 130.2069691                                           | 2166.127326                                           |
| 12.22372757                              | 0.034882566                                          | 157.0582235                                           | 4643.174661                                           |
| 5.349272349                              | 0.016452677                                          | 318.7400283                                           | 2802.488565                                           |
| 10.18438538                              | 0.010802668                                          | 484.0923235                                           | 10775.10714                                           |
| 8.60518732                               | 0.025985663                                          | 184.7998041                                           | 3311.442363                                           |
| 11.3473745                               | 0.017006955                                          | 273.6386717                                           | 8005.69648                                            |
| 11.29030007                              | 0.03871211                                           | 150.1875693                                           | 3779.879972                                           |
| 7.063456091                              | 0.014382551                                          | 364.8376911                                           | 4956.854958                                           |
| 30.98347758                              | 0.133896743                                          | 69.31157211                                           | 7410.022817                                           |
| 8.177099717                              | 0.036009692                                          | 115.3205724                                           | 2251.719094                                           |
| 25.18819562                              | 0.061077179                                          | 116.5354489                                           | 10611.04806                                           |
| 9.102311854                              | 0.020481206                                          | 223.6262174                                           | 4645.491392                                           |
| 6.576923077                              | 0.054414535                                          | 97.5717735                                            | 1618.240385                                           |
| 4.572289157                              | 0.022873522                                          | 195.818033                                            | 1551.388554                                           |
| 14.16732673                              | 0.05574188                                           | 87.22853875                                           | 3834.209406                                           |
| 11.02430556                              | 0.026681939                                          | 201.7377096                                           | 5021.520486                                           |
| 13.68634466                              | 0.047184499                                          | 114.8255988                                           | 4243.369708                                           |
| 9.955688623                              | 0.064754475                                          | 71.1695942                                            | 1898.069461                                           |
| 10.54242135                              | 0.056900825                                          | 85.1119432                                            | 2268.950429                                           |
| 10.50203528                              | 0.023162909                                          | 226.9352869                                           | 5297.588874                                           |
| 12.50472193                              | 0.075752711                                          | 67.27804898                                           | 2342.966422                                           |
| 12.20706456                              | 0.047537256                                          | 91.42914886                                           | 3394.356273                                           |
| 9.844878049                              | 0.028302911                                          | 156.2945616                                           | 3779.396098                                           |
| 7.766773163                              | 0.015570957                                          | 361.3759019                                           | 5916.771565                                           |
| 9.028725314                              | 0.028854624                                          | 139.1547753                                           | 3111.611311                                           |
| 8.383966245                              | 0.005249659                                          | 827.7230485                                           | 14494.19878                                           |
| 9.058319039                              | 0.051085152                                          | 114.9620862                                           | 2190.915952                                           |
| 7.104477612                              | 0.13020754                                           | 75.08674959                                           | 944.9402985                                           |
| 6.171026157                              | 0.053221204                                          | 137.4416801                                           | 1271.2334                                             |
| 16.48247664                              | 0.063185145                                          | 85.22706271                                           | 4546.517815                                           |
| 9.120918984                              | 0.038089944                                          | 111.7708458                                           | 2524.273277                                           |
| 8.940329757                              | 0.023920052                                          | 186.9126901                                           | 3777.97095                                            |
| 8.03891709                               | 0.042492711                                          | 115.6424995                                           | 2043.803723                                           |
| 24.51739997                              | 0.054147203                                          | 126.6533814                                           | 11359.6425                                            |
| 7.60523322                               | 0.056935333                                          | 101.5893112                                           | 1399.906712                                           |
| 13.07113543                              | 0.040298112                                          | 119.2056943                                           | 4511.005472                                           |
| 9.569218871                              | 0.056822403                                          | 86.67999573                                           | 2111.546017                                           |
| 17.26535627                              | 0.057897396                                          | 147.0483171                                           | 6570.259214                                           |
| 14.80703746                              | 0.021118849                                          | 258.3552289                                           | 11208.37684                                           |
| 10.07786692                              | 0.022051011                                          | 219.2131341                                           | 5165.117036                                           |
| 7.989777291                              | 0.012565351                                          | 331.0904322                                           | 5692.517707                                           |
| 17.17993528                              | 0.058770252                                          | 117.1817879                                           | 5288.752427                                           |
| 41.81215672                              | 0.203313123                                          | 43.28350776                                           | 8774.033321                                           |
| 8.649769585                              | 0.059405997                                          | 81.84161494                                           | 1603.373272                                           |
| 10.15647135                              | 0.021116145                                          | 272.3439434                                           | 6145.430135                                           |
| 5.76142132                               | 0.018323108                                          | 218.0170481                                           | 2522.807107                                           |
| 14.41945574                              | 0.050294275                                          | 104.2130059                                           | 4395.828589                                           |
| 10.43049327                              | 0.150795371                                          | 39.75530098                                           | 956.6569507                                           |
| 7.00198906                               | 0.01111548                                           | 357.0343704                                           | 5009.482844                                           |
| 20.70592105                              | 0.101797666                                          | 66.29336448                                           | 4387.413487                                           |
| 16.93091231                              | 0.114805693                                          | 46.90109513                                           | 2698.414526                                           |
| 24.54218266                              | 0.041788798                                          | 165.2075325                                           | 14672.20317                                           |
| 25.15842764                              | 0.039292749                                          | 188.4045063                                           | 16399.94774                                           |
| 13.36753813                              | 0.01495206                                           | 376.1955029                                           | 12452.30131                                           |
| 7.903225806                              | 0.024797423                                          | 173.7755364                                           | 3019.669355                                           |
| 8.231871083                              | 0.029336405                                          | 184.7923028                                           | 3681.733214                                           |
| 8.393442623                              | 0.04418212                                           | 114.9533556                                           | 2024.072131                                           |
| 10.9829932                               | 0.035926686                                          | 139.0033848                                           | 3760.375283                                           |
| 9.998594519                              | 0.014501456                                          | 344.7182276                                           | 7527.536543                                           |
| 8.821428571                              | 0.052697639                                          | 139.2123703                                           | 2441.470238                                           |
| 5.960477256                              | 0.01760562                                           | 242.2044219                                           | 2536.44519                                            |
| 6.154011461                              | 0.010909818                                          | 400.7780493                                           | 4389.37894                                            |
| 7.924137931                              | 0.086815127                                          | 135.8876686                                           | 3001.193103                                           |
| 10.77351814                              | 0.027794026                                          | 176.1534767                                           | 4555.215276                                           |
| 10.89116143                              | 0.024913915                                          | 177.1255834                                           | 5153.565924                                           |
| 8.701799486                              | 0.018296084                                          | 241.8748798                                           | 4763.913882                                           |
| 5.469072165                              | 0.016232109                                          | 243.2463151                                           | 2369.780284                                           |
| 14.26775956                              | 0.121915279                                          | 68.37810131                                           | 2011.863388                                           |
| 4.866666667                              | 0.045686105                                          | 188.2959974                                           | 1485.4                                                |
| 18.62767296                              | 0.071287624                                          | 92.33758216                                           | 5152.143648                                           |
| 7.575070822                              | 0.024538553                                          | 171.3727313                                           | 2835.458924                                           |
| 6.706457926                              | 0.015323505                                          | 306.3677471                                           | 3673.950098                                           |
| 19.07383863                              | 0.052541604                                          | 125.9514684                                           | 7222.170905                                           |
| 20.57595591                              | 0.050131419                                          | 115.9693486                                           | 8665.26576                                            |
| 3.134387352                              | 0.008588827                                          | 617.0457565                                           | 2877.86166                                            |
| 12.0625                                  | 0.028428134                                          | 199.3497752                                           | 5709.666941                                           |
| 5.276422764                              | 0.047966785                                          | 113.86271                                             | 951.601626                                            |
| 7.274406332                              | 0.014863635                                          | 442.8312833                                           | 5853.91029                                            |
| 13.39157373                              | 0.019544984                                          | 316.8779852                                           | 10073.24659                                           |

| wavelet.HHL_gldm_SmallDependenceLowGrayLevelEmphasis | wavelet.HHL_gldm_LowGrayLevelEmphasis | wavelet.HHL_gldm_DistanceZoneVariabilityNormalized | wavelet.HHL_gldm_LowIntensityEmphasis |
|------------------------------------------------------|---------------------------------------|----------------------------------------------------|---------------------------------------|
| 0.002749207                                          | 0.003845537                           | 0.932724306                                        | 0.005486327                           |
| 0.001660567                                          | 0.003920768                           | 0.925077941                                        | 0.005600667                           |
| 0.005735912                                          | 0.007750528                           | 0.950032873                                        | 0.011075125                           |
| 0.000696958                                          | 0.000987179                           | 0.89721172                                         | 0.001393484                           |
| 0.009643696                                          | 0.022429581                           | 0.948312319                                        | 0.033650314                           |
| 0.004979478                                          | 0.009123422                           | 0.898106509                                        | 0.013182654                           |
| 0.00619601                                           | 0.008038386                           | 0.759349244                                        | 0.011328565                           |
| 0.004764226                                          | 0.006237436                           | 0.877505646                                        | 0.0093677                             |
| 0.001282866                                          | 0.002295575                           | 0.957421666                                        | 0.003125655                           |
| 0.001579452                                          | 0.002852351                           | 0.947406866                                        | 0.003677124                           |
| 0.002768679                                          | 0.005057175                           | 0.908838841                                        | 0.006733983                           |
| 0.001969013                                          | 0.003394586                           | 0.898168071                                        | 0.004680655                           |
| 0.00070624                                           | 0.0010073                             | 0.917593718                                        | 0.001639627                           |
| 0.003187472                                          | 0.007677637                           | 0.927274878                                        | 0.010982758                           |
| 0.002821948                                          | 0.00449349                            | 0.871581451                                        | 0.006036626                           |
| 0.00071742                                           | 0.001794552                           | 0.929458956                                        | 0.002760213                           |
| 0.004767707                                          | 0.010986779                           | 0.87099304                                         | 0.017205457                           |
| 0.00112635                                           | 0.002344459                           | 0.956438094                                        | 0.003427212                           |
| 0.00390463                                           | 0.006078697                           | 0.84091183                                         | 0.010006677                           |
| 0.002687182                                          | 0.006001449                           | 0.961797942                                        | 0.008778894                           |
| 0.00139656                                           | 0.003106141                           | 0.899295517                                        | 0.004089289                           |
| 0.003837521                                          | 0.006547232                           | 0.871075947                                        | 0.008764233                           |
| 0.001964184                                          | 0.003764509                           | 0.934340507                                        | 0.004944817                           |
| 0.005494088                                          | 0.006585513                           | 0.735036521                                        | 0.009119578                           |
| 0.001412373                                          | 0.001964021                           | 0.877116102                                        | 0.002979506                           |
| 0.003312651                                          | 0.004885483                           | 0.904734557                                        | 0.007039138                           |
| 0.000925919                                          | 0.00187369                            | 0.897361937                                        | 0.002430996                           |
| 0.00245174                                           | 0.00460478                            | 0.965365097                                        | 0.006147609                           |
| 0.001785865                                          | 0.002947018                           | 0.944489796                                        | 0.003614597                           |
| 0.002603145                                          | 0.005882922                           | 0.93598478                                         | 0.009548941                           |
| 0.003090046                                          | 0.00587834                            | 0.958657537                                        | 0.007528284                           |
| 0.000933451                                          | 0.002749397                           | 0.948902138                                        | 0.003506435                           |
| 0.002163339                                          | 0.003482607                           | 0.946045891                                        | 0.005137633                           |
| 0.02492603                                           | 0.027725705                           | 0.834710744                                        | 0.047921164                           |
| 0.008250471                                          | 0.009973489                           | 0.859841423                                        | 0.013496868                           |
| 0.001895151                                          | 0.004728126                           | 0.88521634                                         | 0.006401299                           |
| 0.001588174                                          | 0.003100236                           | 0.961195334                                        | 0.003952057                           |
| 0.002067075                                          | 0.004376801                           | 0.932087184                                        | 0.005769171                           |
| 0.005484453                                          | 0.009954027                           | 0.900277008                                        | 0.014714072                           |
| 0.004521381                                          | 0.008076832                           | 0.959293612                                        | 0.01185911                            |
| 0.001942942                                          | 0.003252899                           | 0.863600437                                        | 0.004627304                           |
| 0.005231964                                          | 0.009331384                           | 0.936301051                                        | 0.015541391                           |
| 0.002222914                                          | 0.004950348                           | 0.944489796                                        | 0.006959492                           |
| 0.002112201                                          | 0.003905242                           | 0.853287125                                        | 0.00554203                            |
| 0.001067825                                          | 0.002729278                           | 0.890724202                                        | 0.002912353                           |
| 0.002308921                                          | 0.004239095                           | 0.963976096                                        | 0.00565095                            |
| 0.000544686                                          | 0.000873321                           | 0.850986121                                        | 0.001132277                           |
| 0.007095257                                          | 0.010608308                           | 0.957315702                                        | 0.016169855                           |
| 0.012615805                                          | 0.029296119                           | 0.792387543                                        | 0.03364125                            |
| 0.009555489                                          | 0.014004804                           | 0.833621812                                        | 0.018685519                           |
| 0.001921591                                          | 0.004733089                           | 0.965402352                                        | 0.006501519                           |
| 0.003668918                                          | 0.006213413                           | 0.971836735                                        | 0.009191859                           |
| 0.002018315                                          | 0.003616282                           | 0.925831135                                        | 0.004797254                           |
| 0.007434956                                          | 0.010327234                           | 0.918790346                                        | 0.016259914                           |
| 0.000939912                                          | 0.00261577                            | 0.975946704                                        | 0.003568377                           |
| 0.007557929                                          | 0.011727885                           | 0.856198973                                        | 0.016291827                           |
| 0.001689278                                          | 0.003803285                           | 0.795213418                                        | 0.005237325                           |
| 0.005149888                                          | 0.009099395                           | 0.806172118                                        | 0.013792014                           |
| 0.002593288                                          | 0.006259661                           | 0.91838753                                         | 0.008829582                           |
| 0.00163727                                           | 0.002560297                           | 0.974114485                                        | 0.004839726                           |
| 0.001857533                                          | 0.003179824                           | 0.940871361                                        | 0.004436514                           |
| 0.001050811                                          | 0.001957683                           | 0.925511635                                        | 0.002356331                           |
| 0.002291206                                          | 0.004615002                           | 0.966084415                                        | 0.00625963                            |
| 0.00223928                                           | 0.006218015                           | 0.974549685                                        | 0.011455873                           |
| 0.009317828                                          | 0.01333739                            | 0.902221278                                        | 0.021962705                           |
| 0.001855734                                          | 0.003393331                           | 0.90008343                                         | 0.004657036                           |
| 0.004300535                                          | 0.005693248                           | 0.828013349                                        | 0.008045318                           |
| 0.001914086                                          | 0.004353715                           | 0.953556233                                        | 0.005974784                           |
| 0.011658867                                          | 0.02196284                            | 0.941573523                                        | 0.034045348                           |
| 0.00134281                                           | 0.002165504                           | 0.959314514                                        | 0.002752359                           |
| 0.00233541                                           | 0.005926214                           | 0.927338656                                        | 0.008035853                           |
| 0.003596607                                          | 0.008653782                           | 0.922514563                                        | 0.012999916                           |
| 0.000732272                                          | 0.001996238                           | 0.951051277                                        | 0.002764456                           |
| 0.000676515                                          | 0.001822874                           | 0.943399073                                        | 0.002386939                           |
| 0.000661049                                          | 0.001366303                           | 0.951824533                                        | 0.001693337                           |
| 0.002362762                                          | 0.004230821                           | 0.844203509                                        | 0.005583024                           |
| 0.003165571                                          | 0.006079138                           | 0.859512329                                        | 0.008256132                           |
| 0.004679167                                          | 0.007848402                           | 0.937129377                                        | 0.011067137                           |
| 0.002966948                                          | 0.004982438                           | 0.928864282                                        | 0.007758916                           |
| 0.001177049                                          | 0.002004061                           | 0.913342234                                        | 0.002610489                           |
| 0.006083386                                          | 0.009737002                           | 0.894272                                           | 0.013447944                           |
| 0.003345188                                          | 0.004673162                           | 0.814859521                                        | 0.006129479                           |
| 0.001512857                                          | 0.002419161                           | 0.91536063                                         | 0.002879847                           |
| 0.005006075                                          | 0.018355285                           | 0.830078125                                        | 0.020479889                           |
| 0.001778834                                          | 0.003397544                           | 0.97277578                                         | 0.004488479                           |
| 0.001316683                                          | 0.002815877                           | 0.832181252                                        | 0.003584549                           |
| 0.002324162                                          | 0.003483311                           | 0.955205622                                        | 0.005387297                           |
| 0.002642014                                          | 0.004073727                           | 0.832732406                                        | 0.004971365                           |
| 0.014367223                                          | 0.020168566                           | 0.9232                                             | 0.036569359                           |
| 0.028086953                                          | 0.030141163                           | 0.945987654                                        | 0.041725202                           |
| 0.002259657                                          | 0.005059605                           | 0.931709609                                        | 0.007110466                           |
| 0.003317263                                          | 0.005054156                           | 0.928864282                                        | 0.007123592                           |
| 0.002432546                                          | 0.003510666                           | 0.875159243                                        | 0.004560375                           |
| 0.001540079                                          | 0.003496404                           | 0.948716988                                        | 0.004874963                           |
| 0.000935965                                          | 0.002761604                           | 0.945629019                                        | 0.003560263                           |
| 0.005420824                                          | 0.005875089                           | 0.749586484                                        | 0.007599668                           |
| 0.002139804                                          | 0.003625781                           | 0.970211656                                        | 0.005269627                           |
| 0.013703394                                          | 0.01748153                            | 0.892244898                                        | 0.025206613                           |
| 0.003498161                                          | 0.00469294                            | 0.783109499                                        | 0.007051576                           |
| 0.00188925                                           | 0.002728059                           | 0.905                                              | 0.00459752                            |



| wavelet.HHL_gldzm_LargeDistanceEmphasis | wavelet.HHL_gldzm_HighIntensitySmallDistanceEmphasis | wavelet.HHL_gldzm_LowIntensityLargeDistanceEmphasis | wavelet.HHL_gldzm_HighIntensityEmphasis |
|-----------------------------------------|------------------------------------------------------|-----------------------------------------------------|-----------------------------------------|
| 1.104557641                             | 604.0241287                                          | 0.005715903                                         | 622.8123324                             |
| 1.116941529                             | 355.9955022                                          | 0.010541381                                         | 368.0089955                             |
| 1.076923077                             | 355.6388889                                          | 0.011460126                                         | 361.4273504                             |
| 1.163043478                             | 1864.670471                                          | 0.001498566                                         | 1941.453623                             |
| 1.079646018                             | 90.62389381                                          | 0.034724941                                         | 92.86725664                             |
| 1.161538462                             | 202.3451923                                          | 0.01562635                                          | 210.0165385                             |
| 1.419689119                             | 353.8082902                                          | 0.014081843                                         | 390.9119171                             |
| 1.196629213                             | 451.1451311                                          | 0.011610568                                         | 474.6816479                             |
| 1.065288357                             | 682.5223069                                          | 0.003244095                                         | 695.3808487                             |
| 1.081081081                             | 535.0169785                                          | 0.004019759                                         | 544.3548164                             |
| 1.143617021                             | 370.7513298                                          | 0.015982306                                         | 380.7606383                             |
| 1.161434978                             | 482.637145                                           | 0.005235192                                         | 505.2032885                             |
| 1.129171152                             | 2057.886975                                          | 0.001710335                                         | 2128.039828                             |
| 1.113372093                             | 196.9556686                                          | 0.012273151                                         | 200.9738372                             |
| 1.206896552                             | 381.9698276                                          | 0.006819879                                         | 402.6724138                             |
| 1.109832636                             | 796.3353818                                          | 0.002987361                                         | 818.6223849                             |
| 1.207920792                             | 146.7549505                                          | 0.019646973                                         | 154.5148515                             |
| 1.066831683                             | 645.143255                                           | 0.003583238                                         | 654.6064356                             |
| 1.261410788                             | 367.496888                                           | 0.013328713                                         | 388.1078838                             |
| 1.058441558                             | 269.8187229                                          | 0.012262104                                         | 274.758658                              |
| 1.159541189                             | 438.3902503                                          | 0.004831454                                         | 457.0589155                             |
| 1.207776428                             | 289.5674362                                          | 0.011440439                                         | 306.7290401                             |
| 1.101954121                             | 398.8532285                                          | 0.005371054                                         | 411.4808836                             |
| 1.471571906                             | 520.8745819                                          | 0.020852485                                         | 580.1672241                             |
| 1.197301855                             | 1045.327572                                          | 0.003202248                                         | 1097.08769                              |
| 1.150442478                             | 403.3171091                                          | 0.007553657                                         | 418.5073746                             |
| 1.162790698                             | 721.5218464                                          | 0.002851704                                         | 750.6095842                             |
| 1.052884615                             | 381.0220353                                          | 0.006351755                                         | 386.3285256                             |
| 1.085714286                             | 742.6818878                                          | 0.003809227                                         | 758.5673469                             |
| 1.099310345                             | 257.1844828                                          | 0.01043918                                          | 264.5613793                             |
| 1.063351499                             | 285.9281335                                          | 0.008052653                                         | 290.6743869                             |
| 1.078711986                             | 439.3300537                                          | 0.003907939                                         | 448.1645796                             |
| 1.083240844                             | 545.6600999                                          | 0.005328132                                         | 557.5760266                             |
| 1.272727273                             | 214.5590909                                          | 0.107921164                                         | 218.9636364                             |
| 1.227488152                             | 335.7950237                                          | 0.017435929                                         | 354.5023697                             |
| 1.18338558                              | 284.5423197                                          | 0.007400684                                         | 299.0250784                             |
| 1.059382423                             | 514.0902613                                          | 0.004133669                                         | 520.871734                              |
| 1.10558531                              | 320.6727238                                          | 0.006325939                                         | 329.7146136                             |
| 1.157894737                             | 193.7616959                                          | 0.015898537                                         | 201.380117                              |
| 1.062355658                             | 233.6616628                                          | 0.012776981                                         | 236.3949192                             |
| 1.220858896                             | 535.3784509                                          | 0.005210428                                         | 569.9417178                             |
| 1.098802395                             | 199.6025449                                          | 0.017264997                                         | 205.2365269                             |
| 1.085714286                             | 283.7857143                                          | 0.007396423                                         | 291.0875                                |
| 1.239130435                             | 406.5072464                                          | 0.006584363                                         | 431.0072464                             |
| 1.174006445                             | 789.57116                                            | 0.003340128                                         | 818.1750806                             |
| 1.055045872                             | 355.7622324                                          | 0.006323133                                         | 359.529052                              |
| 1.243243243                             | 1699.473889                                          | 0.001301566                                         | 1806.91388                              |
| 1.065454545                             | 276.7045455                                          | 0.016947023                                         | 278.36                                  |
| 1.352941176                             | 147.3088235                                          | 0.036540461                                         | 170.8235294                             |
| 1.274725275                             | 265.3736264                                          | 0.035510445                                         | 281.3956044                             |
| 1.052826691                             | 294.2001854                                          | 0.006795946                                         | 298.4374421                             |
| 1.042857143                             | 291.8471429                                          | 0.009400924                                         | 295.5457143                             |
| 1.115716753                             | 452.1446459                                          | 0.005182553                                         | 466.7512953                             |
| 1.127208481                             | 265.2968198                                          | 0.02743033                                          | 274.7314488                             |
| 1.036524626                             | 479.4719148                                          | 0.003686271                                         | 483.6153846                             |
| 1.233944954                             | 212.3325688                                          | 0.019265468                                         | 228.4541284                             |
| 1.347411444                             | 340.7895095                                          | 0.006895149                                         | 373.6444142                             |
| 1.326213592                             | 217.9014563                                          | 0.016897975                                         | 238.6640777                             |
| 1.127868852                             | 413.547541                                           | 0.009250511                                         | 428.3606557                             |
| 1.039344262                             | 787.3491803                                          | 0.004893704                                         | 794.8786885                             |
| 1.09148265                              | 541.0157729                                          | 0.005644165                                         | 552.7223975                             |
| 1.116236162                             | 744.4580258                                          | 0.002582677                                         | 766.5863469                             |
| 1.051766639                             | 325.9574774                                          | 0.006536137                                         | 330.1709121                             |
| 1.038674033                             | 222.4111418                                          | 0.012023976                                         | 224.2412523                             |
| 1.154639175                             | 202.8530928                                          | 0.056507378                                         | 205.6907216                             |
| 1.158345221                             | 627.2014979                                          | 0.004929068                                         | 659.7360913                             |
| 1.285067873                             | 424.091629                                           | 0.009166064                                         | 452.5339367                             |
| 1.07136322                              | 327.2666972                                          | 0.006330372                                         | 333.2488564                             |
| 1.090361446                             | 112.75                                               | 0.035786851                                         | 116.8975904                             |
| 1.062322946                             | 765.4796978                                          | 0.002880115                                         | 777.5476865                             |
| 1.113268608                             | 222.6704423                                          | 0.008780012                                         | 229.0960086                             |
| 1.121118012                             | 165.9580745                                          | 0.014031333                                         | 171.4968944                             |
| 1.075313808                             | 630.9482218                                          | 0.002911019                                         | 642.9811715                             |
| 1.087450593                             | 661.729249                                           | 0.002602657                                         | 676.701087                              |
| 1.074093131                             | 976.6117829                                          | 0.001788571                                         | 996.7188063                             |
| 1.255445545                             | 390.7212871                                          | 0.01225968                                          | 424.4594059                             |
| 1.228070175                             | 433.0891813                                          | 0.015793122                                         | 456.7251462                             |
| 1.097472924                             | 279.0722022                                          | 0.011829697                                         | 284.1407942                             |
| 1.110795455                             | 369.8924006                                          | 0.008223374                                         | 379.8735795                             |
| 1.136167147                             | 778.7961095                                          | 0.002834526                                         | 807.6743516                             |
| 1.168                                   | 304.16                                               | 0.016227342                                         | 315.776                                 |
| 1.309677419                             | 430.826129                                           | 0.01128106                                          | 472.0296774                             |
| 1.132841328                             | 761.4375769                                          | 0.003726477                                         | 786.4329643                             |
| 1.28125                                 | 346.9179688                                          | 0.021413837                                         | 375.96875                               |
| 1.041407867                             | 451.7727743                                          | 0.004819015                                         | 457.2587992                             |
| 1.279505947                             | 461.4562494                                          | 0.004461151                                         | 495.2680695                             |
| 1.068767908                             | 578.6669054                                          | 0.005467653                                         | 593.8710602                             |
| 1.2763596                               | 453.0446726                                          | 0.006348135                                         | 482.3862375                             |
| 1.12                                    | 172.5233333                                          | 0.037892268                                         | 175.9333333                             |
| 1.083333333                             | 310.3125                                             | 0.043577053                                         | 312.9166667                             |
| 1.10619469                              | 289.0663717                                          | 0.007840481                                         | 297.9336283                             |
| 1.110795455                             | 393.9446023                                          | 0.007595724                                         | 402.0710227                             |
| 1.200686106                             | 574.7714408                                          | 0.00508611                                          | 609.787307                              |
| 1.079005121                             | 401.4696416                                          | 0.005330914                                         | 408.1806876                             |
| 1.083903045                             | 429.8814481                                          | 0.00380345                                          | 440.1758856                             |
| 1.440217391                             | 850.8288043                                          | 0.026124184                                         | 949.5434783                             |
| 1.04536862                              | 514.8738185                                          | 0.005390608                                         | 519.9168242                             |
| 1.171428571                             | 228.2928571                                          | 0.027155646                                         | 237.7428571                             |
| 1.371287129                             | 869.6299505                                          | 0.009209297                                         | 948.0792079                             |
| 1.15                                    | 782.1661765                                          | 0.004884275                                         | 809.9117647                             |

| wavelet.HHL_gldzm_DistanceZoneVariability | wavelet.HHL_gldzm_ZonePercentage | wavelet.HHL_gldzm_IntensityVariabilityNormalized | wavelet.HHL_gldzm_LowIntensitySmallDistanceEmphasis | wavelet.HHL_gldzm_IntensityVariability |
|-------------------------------------------|----------------------------------|--------------------------------------------------|-----------------------------------------------------|----------------------------------------|
| 347.9061662                               | 0.528328612                      | 0.039481345                                      | 0.005428934                                         | 14.72654155                            |
| 617.0269865                               | 0.321136254                      | 0.056034202                                      | 0.004365489                                         | 37.37481259                            |
| 222.3076923                               | 0.539170507                      | 0.047556432                                      | 0.010978875                                         | 11.12820513                            |
| 1238.152174                               | 0.523719165                      | 0.038293426                                      | 0.001367213                                         | 52.84492754                            |
| 107.159292                                | 0.314763231                      | 0.080742423                                      | 0.033381657                                         | 9.123893805                            |
| 233.5076923                               | 0.404354588                      | 0.059733728                                      | 0.01257173                                          | 15.53076923                            |
| 146.5544041                               | 0.572700297                      | 0.04872614                                       | 0.010640246                                         | 9.404145078                            |
| 468.588015                                | 0.532934132                      | 0.041219543                                      | 0.008806984                                         | 22.01123596                            |
| 879.8705114                               | 0.442039442                      | 0.046593437                                      | 0.003096045                                         | 42.81936888                            |
| 1367.108108                               | 0.465784377                      | 0.047176394                                      | 0.003591465                                         | 68.07553708                            |
| 341.7234043                               | 0.454655381                      | 0.053488569                                      | 0.004421902                                         | 20.11170213                            |
| 600.8744395                               | 0.451417004                      | 0.044291169                                      | 0.004542021                                         | 29.63079223                            |
| 852.444564                                | 0.447926712                      | 0.043711712                                      | 0.001621951                                         | 40.60818084                            |
| 318.9825581                               | 0.307692308                      | 0.067198486                                      | 0.010660159                                         | 23.11627907                            |
| 404.4137931                               | 0.509330406                      | 0.053219753                                      | 0.005840813                                         | 24.69396552                            |
| 1777.125523                               | 0.275226717                      | 0.050152855                                      | 0.002703426                                         | 95.89225941                            |
| 175.9405941                               | 0.289398281                      | 0.077100284                                      | 0.016595078                                         | 15.57425743                            |
| 772.8019802                               | 0.346483705                      | 0.048202995                                      | 0.003388206                                         | 38.9480198                             |
| 202.659751                                | 0.414089347                      | 0.047846972                                      | 0.009176168                                         | 11.53112033                            |
| 888.7012987                               | 0.329882185                      | 0.056998557                                      | 0.007908091                                         | 52.66666667                            |
| 1724.848801                               | 0.367151608                      | 0.050500119                                      | 0.003903748                                         | 96.85922836                            |
| 716.8955043                               | 0.478488372                      | 0.047623828                                      | 0.008095182                                         | 39.19441069                            |
| 1099.718777                               | 0.430977664                      | 0.04939693                                       | 0.004838258                                         | 58.14018692                            |
| 219.7759197                               | 0.621621622                      | 0.036655071                                      | 0.006186351                                         | 10.95986622                            |
| 520.1298482                               | 0.492524917                      | 0.046190946                                      | 0.00292382                                          | 27.39123103                            |
| 306.7050147                               | 0.488472622                      | 0.051713786                                      | 0.006910508                                         | 17.53097345                            |
| 1273.356589                               | 0.409405655                      | 0.047836147                                      | 0.0022325819                                        | 67.8794926                             |
| 602.3878205                               | 0.435450105                      | 0.050028764                                      | 0.006096572                                         | 31.21794872                            |
| 925.6                                     | 0.555240793                      | 0.035114536                                      | 0.00356594                                          | 34.4122449                             |
| 678.5889655                               | 0.285208497                      | 0.061433532                                      | 0.009326382                                         | 44.53931034                            |
| 1407.309264                               | 0.461780434                      | 0.051883413                                      | 0.007397191                                         | 76.16485014                            |
| 1591.308885                               | 0.282799325                      | 0.064110209                                      | 0.003406059                                         | 107.5128205                            |
| 852.3873474                               | 0.443187408                      | 0.044901398                                      | 0.005090009                                         | 40.45615982                            |
| 45.90909091                               | 0.528846154                      | 0.05785124                                       | 0.032921164                                         | 3.181818182                            |
| 181.4265403                               | 0.635542169                      | 0.041890344                                      | 0.012512103                                         | 8.838862559                            |
| 564.7680251                               | 0.315841584                      | 0.066597223                                      | 0.006151452                                         | 42.48902821                            |
| 1213.989707                               | 0.438541667                      | 0.047550448                                      | 0.003906653                                         | 60.05621536                            |
| 1218.23795                                | 0.389683959                      | 0.055206823                                      | 0.005629979                                         | 72.15531752                            |
| 307.8947368                               | 0.409580838                      | 0.055538456                                      | 0.014417956                                         | 18.99415205                            |
| 415.3741339                               | 0.412774071                      | 0.055144568                                      | 0.011629642                                         | 23.87759815                            |
| 563.0674847                               | 0.442333786                      | 0.044196244                                      | 0.004481523                                         | 28.81595092                            |
| 312.7245509                               | 0.350472193                      | 0.06239019                                       | 0.01511049                                          | 20.83832335                            |
| 528.9142857                               | 0.341047503                      | 0.061779337                                      | 0.00685026                                          | 34.59642857                            |
| 353.2608696                               | 0.403902439                      | 0.054785409                                      | 0.005281447                                         | 22.68115942                            |
| 829.264232                                | 0.495740149                      | 0.041613547                                      | 0.002805409                                         | 38.74221267                            |
| 945.6605505                               | 0.440305206                      | 0.059311423                                      | 0.005482904                                         | 58.18450561                            |
| 1857.702703                               | 0.511720581                      | 0.037019286                                      | 0.001089954                                         | 80.81310124                            |
| 263.2618182                               | 0.471698113                      | 0.051213223                                      | 0.015975563                                         | 14.08363636                            |
| 53.88235294                               | 0.507462687                      | 0.055795848                                      | 0.032916447                                         | 3.794117647                            |
| 227.5787546                               | 0.549295775                      | 0.04241302                                       | 0.014479287                                         | 11.57875458                            |
| 1041.669138                               | 0.315128505                      | 0.060715092                                      | 0.006427912                                         | 65.5115848                             |
| 340.1428571                               | 0.423216445                      | 0.05637551                                       | 0.009139592                                         | 19.73142857                            |
| 1608.168682                               | 0.454593038                      | 0.046309305                                      | 0.004700929                                         | 80.4392631                             |
| 260.0176678                               | 0.478849408                      | 0.051105645                                      | 0.013467309                                         | 14.46289753                            |
| 1763.535695                               | 0.277019776                      | 0.058292339                                      | 0.003538904                                         | 105.3342557                            |
| 373.3027523                               | 0.496018203                      | 0.04818618                                       | 0.015548417                                         | 21.00917431                            |
| 583.6866485                               | 0.334701322                      | 0.055884296                                      | 0.004822868                                         | 41.01907357                            |
| 415.1786408                               | 0.398298531                      | 0.053399943                                      | 0.013015524                                         | 27.50097087                            |
| 280.1081967                               | 0.374692875                      | 0.047653856                                      | 0.00872435                                          | 14.53442623                            |
| 297.104918                                | 0.346197503                      | 0.054168234                                      | 0.004826231                                         | 16.52131148                            |
| 894.7686646                               | 0.448796602                      | 0.042659174                                      | 0.004134602                                         | 40.56887487                            |
| 2508.136531                               | 0.494706097                      | 0.043876854                                      | 0.002299744                                         | 118.9062731                            |
| 1175.724733                               | 0.393851133                      | 0.053249332                                      | 0.006190503                                         | 64.80443714                            |
| 529.1804788                               | 0.198828268                      | 0.079311783                                      | 0.011313848                                         | 43.06629834                            |
| 87.51546392                               | 0.447004608                      | 0.05834839                                       | 0.013326537                                         | 5.659793814                            |
| 630.9058488                               | 0.451384417                      | 0.042557911                                      | 0.004589027                                         | 29.83309558                            |
| 182.9909502                               | 0.560913706                      | 0.045760734                                      | 0.007765131                                         | 10.11312217                            |
| 1042.236962                               | 0.341883015                      | 0.058898471                                      | 0.005885887                                         | 64.37602928                            |
| 156.3012048                               | 0.372197309                      | 0.069531137                                      | 0.033609972                                         | 11.54216867                            |
| 1015.91407                                | 0.52660368                       | 0.043386379                                      | 0.00272042                                          | 45.94617564                            |
| 859.6429342                               | 0.304934211                      | 0.069311055                                      | 0.007849813                                         | 64.25134844                            |
| 297.0496894                               | 0.285208149                      | 0.07241233                                       | 0.012742062                                         | 23.31677019                            |
| 1363.807531                               | 0.27747678                       | 0.063646567                                      | 0.002727816                                         | 91.26917713                            |
| 1909.439723                               | 0.301369863                      | 0.054305352                                      | 0.002333009                                         | 109.9140316                            |
| 3699.74196                                | 0.423420479                      | 0.044161308                                      | 0.001669529                                         | 171.6550039                            |
| 426.3227723                               | 0.452508961                      | 0.052265464                                      | 0.00391386                                          | 26.39405941                            |
| 440.9298246                               | 0.459265891                      | 0.046779826                                      | 0.006371884                                         | 23.99805068                            |
| 259.5848375                               | 0.454098361                      | 0.050841273                                      | 0.010876497                                         | 14.08303249                            |
| 653.9204545                               | 0.399092971                      | 0.051979759                                      | 0.007642801                                         | 36.59375                               |
| 1267.71902                                | 0.487702038                      | 0.043135272                                      | 0.00255448                                          | 59.87175793                            |
| 223.568                                   | 0.496031746                      | 0.050656                                         | 0.012753095                                         | 12.664                                 |
| 631.516129                                | 0.57792692                       | 0.043433091                                      | 0.004841584                                         | 33.66064516                            |
| 1488.376384                               | 0.582378223                      | 0.039531355                                      | 0.002668189                                         | 64.27798278                            |
| 53.125                                    | 0.44137931                       | 0.057617188                                      | 0.020246403                                         | 3.6875                                 |
| 1409.552105                               | 0.427307579                      | 0.05126355                                       | 0.004405844                                         | 74.28088337                            |
| 1819.148216                               | 0.399196494                      | 0.050423179                                      | 0.003366047                                         | 110.2250686                            |
| 333.3667622                               | 0.448586118                      | 0.045557918                                      | 0.005367208                                         | 15.89971347                            |
| 750.2918979                               | 0.580541237                      | 0.04119852                                       | 0.004627173                                         | 37.11986681                            |
| 69.24                                     | 0.409836066                      | 0.070222222                                      | 0.036238632                                         | 5.266666667                            |
| 68.11111111                               | 0.685714286                      | 0.045524691                                      | 0.041262239                                         | 3.277777778                            |
| 1263.39823                                | 0.341132075                      | 0.05754279                                       | 0.006927962                                         | 78.0280236                             |
| 326.9602273                               | 0.498583569                      | 0.050216296                                      | 0.007005559                                         | 17.67613636                            |
| 510.2178388                               | 0.570450098                      | 0.038639085                                      | 0.004428941                                         | 22.52658662                            |
| 1296.896123                               | 0.334229829                      | 0.053733393                                      | 0.004760975                                         | 73.45354792                            |
| 1521.517091                               | 0.277127111                      | 0.065213117                                      | 0.003499466                                         | 104.9279055                            |
| 137.923913                                | 0.727272727                      | 0.033494802                                      | 0.002968539                                         | 6.163043478                            |
| 513.241966                                | 0.435032895                      | 0.046765842                                      | 0.005239382                                         | 24.73913043                            |
| 62.45714286                               | 0.569105691                      | 0.059183673                                      | 0.024719354                                         | 4.142857143                            |
| 158.1881188                               | 0.53298153                       | 0.041123419                                      | 0.006512146                                         | 8.306930693                            |
| 307.7                                     | 0.421313507                      | 0.048183391                                      | 0.004525832                                         | 16.38235294                            |

| wavelet.HHL_gldzm_HighIntensityLargeDistanceEmphasis | wavelet.HHL_gldzm_SmallDistanceEmphasis | wavelet.HHL_gldzm_SumVariance | wavelet.HHL_gldzm_Homogeneity1 | wavelet.HHL_gldzm_Homogeneity2 |
|------------------------------------------------------|-----------------------------------------|-------------------------------|--------------------------------|--------------------------------|
| 697.9651475                                          | 0.97386059                              | 1890.383319                   | 0.245421391                    | 0.158005608                    |
| 416.0629685                                          | 0.970764618                             | 1087.827439                   | 0.370333145                    | 0.290450539                    |
| 384.5811966                                          | 0.980769231                             | 997.7636224                   | 0.255782534                    | 0.162226236                    |
| 2248.586232                                          | 0.95923913                              | 6786.462206                   | 0.253974584                    | 0.168286156                    |
| 101.840708                                           | 0.980088496                             | 193.5288828                   | 0.370004171                    | 0.2819899                      |
| 240.9269231                                          | 0.959615385                             | 543.8990063                   | 0.316888077                    | 0.224187078                    |
| 539.3264249                                          | 0.89507772                              | 1063.62572                    | 0.241295939                    | 0.148570058                    |
| 568.8277154                                          | 0.950842697                             | 1361.641026                   | 0.243987673                    | 0.154941248                    |
| 746.8150163                                          | 0.983677911                             | 2182.095216                   | 0.28272157                     | 0.192356148                    |
| 581.7061677                                          | 0.97972973                              | 1655.452339                   | 0.28896001                     | 0.200235814                    |
| 420.7978723                                          | 0.964095745                             | 1097.722036                   | 0.284763826                    | 0.189889284                    |
| 595.4678625                                          | 0.959641256                             | 1519.271932                   | 0.279204466                    | 0.189806084                    |
| 2408.651238                                          | 0.967707212                             | 7452.988192                   | 0.286761415                    | 0.197338852                    |
| 217.0465116                                          | 0.971656977                             | 543.840252                    | 0.366121016                    | 0.279606124                    |
| 485.4827586                                          | 0.948275862                             | 1209.253615                   | 0.275227326                    | 0.182370442                    |
| 907.7703975                                          | 0.972541841                             | 2621.751963                   | 0.421975416                    | 0.356327419                    |
| 185.5544554                                          | 0.948019802                             | 383.7385373                   | 0.379855713                    | 0.293448507                    |
| 692.4591584                                          | 0.983292079                             | 2015.625409                   | 0.344716326                    | 0.263158964                    |
| 470.5518672                                          | 0.934647303                             | 1090.013493                   | 0.286996737                    | 0.196174642                    |
| 294.5183983                                          | 0.98538961                              | 748.8178499                   | 0.375797577                    | 0.29611406                     |
| 531.7335766                                          | 0.960114703                             | 1371.863499                   | 0.355495786                    | 0.277032792                    |
| 375.3754557                                          | 0.948055893                             | 845.3717343                   | 0.263320651                    | 0.171013572                    |
| 461.9915038                                          | 0.97451147                              | 1206.615359                   | 0.311956162                    | 0.226489964                    |
| 817.3377926                                          | 0.882107023                             | 1717.028256                   | 0.212613689                    | 0.125045424                    |
| 1304.128162                                          | 0.950674536                             | 3667.456936                   | 0.291063481                    | 0.203251449                    |
| 479.2684366                                          | 0.962389381                             | 1207.311204                   | 0.289517483                    | 0.198567705                    |
| 866.9605356                                          | 0.959302326                             | 2370.979635                   | 0.303423446                    | 0.215675328                    |
| 407.5544872                                          | 0.986778846                             | 1087.927051                   | 0.305063628                    | 0.218368002                    |
| 822.1091837                                          | 0.978571429                             | 2286.367998                   | 0.229446542                    | 0.149052257                    |
| 294.0689655                                          | 0.975172414                             | 753.5138646                   | 0.415655583                    | 0.343745027                    |
| 309.6594005                                          | 0.984162125                             | 826.6967339                   | 0.288433669                    | 0.197202237                    |
| 483.5026834                                          | 0.980322004                             | 1384.501111                   | 0.414719042                    | 0.341297325                    |
| 605.2397336                                          | 0.979189789                             | 1694.101497                   | 0.280903888                    | 0.192306539                    |
| 236.5818182                                          | 0.931818182                             | 624.4212297                   | 0.277013745                    | 0.185598273                    |
| 429.3317536                                          | 0.943127962                             | 976.5248146                   | 0.219186199                    | 0.130227404                    |
| 356.9561129                                          | 0.954153605                             | 863.7903386                   | 0.352858209                    | 0.265827433                    |
| 547.9976247                                          | 0.985154394                             | 1505.263137                   | 0.307233738                    | 0.223410335                    |
| 365.8821729                                          | 0.973603673                             | 975.2394521                   | 0.322909123                    | 0.234646708                    |
| 231.8538012                                          | 0.960526316                             | 529.4550309                   | 0.315992223                    | 0.224070344                    |
| 247.3279446                                          | 0.984411085                             | 641.4235939                   | 0.319352054                    | 0.229844463                    |
| 708.1947853                                          | 0.944785276                             | 1676.472877                   | 0.291089458                    | 0.204023901                    |
| 227.7724551                                          | 0.975299401                             | 554.6221369                   | 0.34696611                     | 0.257870337                    |
| 320.2946429                                          | 0.978571429                             | 863.4901167                   | 0.34227275                     | 0.253659902                    |
| 529.0072464                                          | 0.940217391                             | 1231.847658                   | 0.309040881                    | 0.21727246                     |
| 932.5907626                                          | 0.956498389                             | 2552.244217                   | 0.262399038                    | 0.173444125                    |
| 374.5963303                                          | 0.986238532                             | 1078.342332                   | 0.309576329                    | 0.217627658                    |
| 2236.673843                                          | 0.939189189                             | 6176.566875                   | 0.249271269                    | 0.16302416                     |
| 284.9818182                                          | 0.983636364                             | 747.3966526                   | 0.294104193                    | 0.202478251                    |
| 264.8823529                                          | 0.911764706                             | 390.863854                    | 0.295600934                    | 0.204890651                    |
| 345.4835165                                          | 0.931318681                             | 666.8357136                   | 0.234732245                    | 0.145834655                    |
| 315.386469                                           | 0.986793327                             | 868.9855164                   | 0.361121099                    | 0.277270048                    |
| 310.34                                               | 0.989285714                             | 844.3141618                   | 0.308710122                    | 0.217257749                    |
| 525.1778929                                          | 0.971070812                             | 1350.14244                    | 0.286981974                    | 0.196961199                    |
| 312.4699647                                          | 0.96819788                              | 747.4125945                   | 0.272933032                    | 0.180357655                    |
| 500.189264                                           | 0.990868843                             | 1520.470149                   | 0.421006566                    | 0.352975263                    |
| 292.940367                                           | 0.941513761                             | 563.5141434                   | 0.275613331                    | 0.185184192                    |
| 505.0640327                                          | 0.913147139                             | 1100.058292                   | 0.332718327                    | 0.243001671                    |
| 321.7145631                                          | 0.918446602                             | 643.3412998                   | 0.303777098                    | 0.21227202                     |
| 487.6131148                                          | 0.968032787                             | 1232.819329                   | 0.341332859                    | 0.260792833                    |
| 824.9967213                                          | 0.990163934                             | 2614.537423                   | 0.34863935                     | 0.264700845                    |
| 599.5488959                                          | 0.977129338                             | 1682.947119                   | 0.283795523                    | 0.197010323                    |
| 855.099631                                           | 0.970940959                             | 2407.598033                   | 0.269222282                    | 0.181023672                    |
| 347.0246508                                          | 0.98705834                              | 951.074713                    | 0.345035336                    | 0.264707911                    |
| 231.5616943                                          | 0.990331492                             | 654.5119046                   | 0.499981131                    | 0.442314433                    |
| 217.0412371                                          | 0.961342006                             | 545.5830853                   | 0.31452405                     | 0.2238579                      |
| 789.874465                                           | 0.960413695                             | 2034.68002                    | 0.286480483                    | 0.20113087                     |
| 566.3031674                                          | 0.928733032                             | 1336.77634                    | 0.244900579                    | 0.153501828                    |
| 357.1774931                                          | 0.982159195                             | 978.1560202                   | 0.343853633                    | 0.257545396                    |
| 133.4879518                                          | 0.977409639                             | 246.3517467                   | 0.335852653                    | 0.243676297                    |
| 825.8196412                                          | 0.984419263                             | 2400.553078                   | 0.256588353                    | 0.166340036                    |
| 254.798274                                           | 0.971682848                             | 649.399362                    | 0.400848659                    | 0.322186275                    |
| 193.6521739                                          | 0.969720497                             | 463.6297857                   | 0.383750679                    | 0.299240809                    |
| 691.1129707                                          | 0.981171548                             | 2070.013558                   | 0.406061668                    | 0.331285762                    |
| 736.5884387                                          | 0.978137352                             | 2225.550431                   | 0.391160859                    | 0.317432066                    |
| 1077.1469                                            | 0.981476717                             | 3247.417338                   | 0.308665                       | 0.225238024                    |
| 559.4118812                                          | 0.936138614                             | 1214.458523                   | 0.278501921                    | 0.184885671                    |
| 551.2690058                                          | 0.942982456                             | 1358.209552                   | 0.279921952                    | 0.190295425                    |
| 304.4151625                                          | 0.975631769                             | 749.147166                    | 0.289136534                    | 0.196740311                    |
| 419.7982955                                          | 0.972301136                             | 1079.14593                    | 0.313649445                    | 0.224468571                    |
| 923.1873199                                          | 0.965958213                             | 2552.698853                   | 0.277088125                    | 0.190163735                    |
| 362.24                                               | 0.958                                   | 870.4646714                   | 0.285733487                    | 0.197309819                    |
| 636.843871                                           | 0.922580645                             | 1356.48014                    | 0.242945533                    | 0.153074348                    |
| 886.4145141                                          | 0.966789668                             | 2431.447174                   | 0.233786589                    | 0.147392142                    |
| 492.171875                                           | 0.9296875                               | 1225.066357                   | 0.303582647                    | 0.214586897                    |
| 479.2028986                                          | 0.989648033                             | 1347.931649                   | 0.3109261                      | 0.223671245                    |
| 632.1093321                                          | 0.930631798                             | 1509.645232                   | 0.307733067                    | 0.218546371                    |
| 654.6876791                                          | 0.982808023                             | 1851.91171                    | 0.282273004                    | 0.192107633                    |
| 589.7524972                                          | 0.9309101                               | 1365.429985                   | 0.230562322                    | 0.141082534                    |
| 189.5733333                                          | 0.97                                    | 409.3259966                   | 0.366434961                    | 0.281424956                    |
| 323.3333333                                          | 0.979166667                             | 893.9907502                   | 0.224755623                    | 0.140668355                    |
| 333.4026549                                          | 0.973451327                             | 855.9679624                   | 0.354934346                    | 0.271709775                    |
| 434.5767045                                          | 0.972301136                             | 1181.809604                   | 0.268709453                    | 0.175472902                    |
| 749.8507719                                          | 0.949828473                             | 1818.384139                   | 0.240206759                    | 0.154647679                    |
| 435.024872                                           | 0.98024872                              | 1204.416287                   | 0.365553114                    | 0.286077037                    |
| 481.3536358                                          | 0.979024239                             | 1374.832585                   | 0.390076864                    | 0.310952577                    |
| 1344.402174                                          | 0.889945652                             | 3032.425991                   | 0.174485219                    | 0.091371893                    |
| 540.0888469                                          | 0.988657845                             | 1560.569021                   | 0.299216881                    | 0.213090263                    |
| 275.5428571                                          | 0.957142857                             | 599.7172652                   | 0.264083998                    | 0.171321545                    |
| 1261.876238                                          | 0.907178218                             | 2842.254798                   | 0.250450625                    | 0.162917735                    |
| 920.8941176                                          | 0.9625                                  | 2590.323584                   | 0.324234921                    | 0.241128212                    |

| wavelet.HHL_glcm_ClusterShade | wavelet.HHL_glcm_MaximumProbability | wavelet.HHL_glcm_Idmn | wavelet.HHL_glcm_SumVariance2 | wavelet.HHL_glcm_Contrast | wavelet.HHL_glcm_DifferenceEntropy |
|-------------------------------|-------------------------------------|-----------------------|-------------------------------|---------------------------|------------------------------------|
| 34.94320967                   | 0.014538555                         | 0.969823177           | 74.71608766                   | 81.39558776               | 4.161477667                        |
| -1.134202556                  | 0.050184573                         | 0.98038343            | 26.08032575                   | 28.15600518               | 3.443969086                        |
| 28.36384488                   | 0.017276167                         | 0.96207185            | 46.10353602                   | 53.28592827               | 3.869252022                        |
| -328.4255488                  | 0.019298452                         | 0.984272006           | 84.47814087                   | 89.6873592                | 4.22314447                         |
| 14.72295316                   | 0.033818347                         | 0.950692438           | 16.18357751                   | 14.65487668               | 3.032536789                        |
| 3.47625433                    | 0.021089313                         | 0.966460015           | 26.31958265                   | 27.51906927               | 3.458721142                        |
| 70.63271234                   | 0.019763861                         | 0.961171215           | 52.37462016                   | 64.39953103               | 3.955346448                        |
| 105.3858124                   | 0.011135559                         | 0.964722797           | 76.281999                     | 74.88862836               | 4.114717185                        |
| 47.89842243                   | 0.017930372                         | 0.982221911           | 50.03563146                   | 52.42320392               | 3.874888148                        |
| -18.58412772                  | 0.018165899                         | 0.976465473           | 48.30223439                   | 50.44203359               | 3.870844198                        |
| -18.26644983                  | 0.019759449                         | 0.969212219           | 34.73659048                   | 37.83449544               | 3.650632367                        |
| -18.34017247                  | 0.014939185                         | 0.97886742            | 54.29117432                   | 53.22675917               | 3.907530508                        |
| 110.1971739                   | 0.017269354                         | 0.991893225           | 72.93043658                   | 66.70506148               | 3.897074849                        |
| -9.520366857                  | 0.026691822                         | 0.9784807             | 19.80384312                   | 18.50348591               | 3.187331907                        |
| 0.019918367                   | 0.015529806                         | 0.970840228           | 37.66183981                   | 44.60630908               | 3.754662678                        |
| 294.9567995                   | 0.082508066                         | 0.993184887           | 42.50342654                   | 43.98298435               | 3.446628475                        |
| 7.024685643                   | 0.039761806                         | 0.977181115           | 15.01232094                   | 15.67426915               | 3.08728698                         |
| -122.5902746                  | 0.030080258                         | 0.981334975           | 45.25300761                   | 38.27347836               | 3.623245485                        |
| 5.092194196                   | 0.019459773                         | 0.969062115           | 41.49197396                   | 49.09817017               | 3.781915776                        |
| 4.425066163                   | 0.050361252                         | 0.979096524           | 25.35541443                   | 25.29272476               | 3.36976907                         |
| -6.032570549                  | 0.048587486                         | 0.982286823           | 34.65075931                   | 37.68587749               | 3.625870992                        |
| 1.421923606                   | 0.014995991                         | 0.966185746           | 42.52173909                   | 52.12661673               | 3.911778874                        |
| 15.39570157                   | 0.029465301                         | 0.974173767           | 39.83442519                   | 44.16392201               | 3.750867917                        |
| 325.8095832                   | 0.012983881                         | 0.964845743           | 102.639436                    | 121.0073172               | 4.364360467                        |
| -139.9594885                  | 0.024846475                         | 0.984666261           | 50.20518249                   | 56.79650502               | 3.869659984                        |
| 73.77717781                   | 0.017477231                         | 0.98153898            | 42.02468557                   | 42.73156659               | 3.714416745                        |
| 42.79431711                   | 0.02098332                          | 0.986543382           | 42.55795897                   | 46.87779622               | 3.796490754                        |
| 0.450301465                   | 0.024829241                         | 0.9680705             | 35.27214896                   | 44.54004864               | 3.73933418                         |
| 18.46331803                   | 0.010172541                         | 0.96324682            | 99.76180929                   | 118.8643509               | 4.323502727                        |
| 3.169424777                   | 0.073121909                         | 0.980156991           | 20.19281567                   | 21.30732734               | 3.246280989                        |
| -6.604802391                  | 0.014435386                         | 0.968186635           | 37.3007907                    | 41.36037491               | 3.745484498                        |
| -8.885546588                  | 0.061086603                         | 0.987526776           | 20.57451768                   | 20.55532957               | 3.191626589                        |
| 11.61499557                   | 0.015864646                         | 0.976811158           | 51.82782885                   | 54.33631952               | 3.919385184                        |
| -96.17277009                  | 0.030396748                         | 0.935799333           | 49.4633708                    | 46.19601723               | 3.618493534                        |
| 52.09661429                   | 0.017703602                         | 0.947163423           | 69.15184011                   | 85.99638881               | 4.176202041                        |
| -4.716306825                  | 0.032706281                         | 0.978578622           | 21.00813629                   | 22.51415895               | 3.335200314                        |
| 75.7259273                    | 0.022306436                         | 0.976402491           | 46.32993065                   | 51.09320633               | 3.83022498                         |
| -16.26188357                  | 0.029337436                         | 0.976248936           | 27.47398061                   | 31.97467541               | 3.584663853                        |
| 26.50591204                   | 0.020312866                         | 0.966274771           | 29.82378157                   | 30.26005452               | 3.522052908                        |
| 10.39369971                   | 0.024073705                         | 0.968844093           | 30.37957915                   | 31.85499212               | 3.556621995                        |
| 53.62520799                   | 0.019982156                         | 0.975249956           | 50.02003801                   | 53.42239157               | 3.896821626                        |
| 4.345159644                   | 0.02731083                          | 0.975607824           | 21.73877376                   | 22.6792358                | 3.332237077                        |
| -16.25039653                  | 0.027097128                         | 0.975764179           | 22.6545747                    | 24.07478144               | 3.378543546                        |
| 63.81815064                   | 0.022310222                         | 0.978397887           | 30.79722847                   | 34.38484981               | 3.591266991                        |
| 76.77596876                   | 0.013823547                         | 0.97396986            | 75.93751847                   | 74.22364452               | 4.077627221                        |
| -28.24571914                  | 0.027583387                         | 0.976130221           | 27.52209956                   | 32.3196095                | 3.566019997                        |
| 261.0335021                   | 0.013691906                         | 0.988283532           | 93.2258377                    | 101.2690668               | 4.270263246                        |
| -31.88419442                  | 0.018705381                         | 0.955993685           | 43.87557331                   | 40.79008534               | 3.710813332                        |
| 23.10970147                   | 0.027626493                         | 0.937020564           | 38.69218365                   | 37.88574449               | 3.546288887                        |
| 130.3294855                   | 0.01504154                          | 0.943192457           | 69.12575585                   | 79.71877747               | 4.11099                            |
| 4.970642625                   | 0.037255916                         | 0.979427204           | 22.47608937                   | 24.8672309                | 3.383695399                        |
| -12.41459209                  | 0.019298986                         | 0.971322195           | 31.27021915                   | 32.87882954               | 3.563307186                        |
| 51.34503693                   | 0.015697048                         | 0.974428536           | 46.89326126                   | 47.67344801               | 3.843916381                        |
| 15.8940227                    | 0.019236137                         | 0.968533032           | 41.41487083                   | 48.77220161               | 3.822502263                        |
| -26.90230359                  | 0.073967388                         | 0.988249785           | 26.25151998                   | 25.62463333               | 3.30973395                         |
| 81.84002303                   | 0.01565084                          | 0.958201342           | 46.64205698                   | 49.79258349               | 3.860467174                        |
| 10.66497513                   | 0.027378125                         | 0.980738438           | 23.46198121                   | 27.16642468               | 3.451978294                        |
| -21.49680585                  | 0.019107624                         | 0.972093302           | 32.38842114                   | 35.91954504               | 3.639884915                        |
| 5.906117416                   | 0.038412917                         | 0.975178268           | 39.33147176                   | 43.4153019                | 3.671675139                        |
| 78.94010943                   | 0.035961095                         | 0.98943632            | 36.49372024                   | 41.29312117               | 3.531634284                        |
| -64.8654815                   | 0.019519775                         | 0.974776747           | 58.0001565                    | 59.98231768               | 3.95437516                         |
| 173.1030808                   | 0.012478953                         | 0.984036274           | 68.01773704                   | 66.83778499               | 4.036814368                        |
| 1.769544868                   | 0.057344375                         | 0.976652573           | 27.76815467                   | 35.66955363               | 3.622350297                        |
| -4.659835112                  | 0.102001656                         | 0.98731244            | 9.936771174                   | 10.22736347               | 2.716221283                        |
| -35.88658092                  | 0.027541938                         | 0.956790342           | 31.4462947                    | 31.71506615               | 3.487780762                        |
| 5.20741169                    | 0.022765896                         | 0.976185383           | 61.37887086                   | 67.29894594               | 4.003510381                        |
| 48.33252883                   | 0.015540985                         | 0.963934379           | 53.62024336                   | 61.87949166               | 3.964119767                        |
| -1.161998914                  | 0.034045286                         | 0.97776423            | 25.67260138                   | 28.68766749               | 3.481660777                        |
| 34.51205919                   | 0.031377871                         | 0.966016667           | 20.96437191                   | 22.21192126               | 3.302082315                        |
| 42.94764164                   | 0.011116516                         | 0.979984362           | 59.87697827                   | 65.89973693               | 4.048766049                        |
| 8.95877514                    | 0.049866861                         | 0.984980888           | 16.02254119                   | 16.55608841               | 3.124300224                        |
| 3.707735298                   | 0.041047427                         | 0.971069199           | 16.00760946                   | 15.67960256               | 3.104094663                        |
| 5.252609195                   | 0.062244802                         | 0.990799667           | 19.89833125                   | 21.73822731               | 3.250203404                        |
| -28.85681898                  | 0.060245736                         | 0.987951249           | 26.44968892                   | 30.09065811               | 3.424331339                        |
| 24.16551672                   | 0.026457104                         | 0.984342949           | 55.59084254                   | 57.69723419               | 3.910470012                        |
| 65.25501829                   | 0.014038615                         | 0.976694231           | 41.99052406                   | 45.75769219               | 3.776705016                        |
| -97.88749673                  | 0.014756329                         | 0.964510824           | 53.5194772                    | 57.10103689               | 3.899126657                        |
| 38.339575                     | 0.016508796                         | 0.967952618           | 44.15204683                   | 42.08228916               | 3.720421612                        |
| 57.48831562                   | 0.020121537                         | 0.980444932           | 34.41858639                   | 36.08615444               | 3.632030984                        |
| -32.37454544                  | 0.018057057                         | 0.981588517           | 58.66428282                   | 60.40969352               | 3.973128201                        |
| -30.67776267                  | 0.022505749                         | 0.963200282           | 46.05986454                   | 52.97539385               | 3.807419472                        |
| 74.99003168                   | 0.01086361                          | 0.968308357           | 61.50361288                   | 68.69752437               | 4.078985191                        |
| 71.00590899                   | 0.009134335                         | 0.974960301           | 85.82689958                   | 92.95797326               | 4.299276816                        |
| -406.3967861                  | 0.035596109                         | 0.959597942           | 48.12133967                   | 43.49161436               | 3.564743561                        |
| -1.66757241                   | 0.023147519                         | 0.97892091            | 39.81841212                   | 43.09784409               | 3.736579186                        |
| -26.44834058                  | 0.018176584                         | 0.978900053           | 39.10535913                   | 38.82725888               | 3.697162582                        |
| -30.38674251                  | 0.017992624                         | 0.980799117           | 44.94812295                   | 50.44716731               | 3.832124704                        |
| 68.18411923                   | 0.009243437                         | 0.971004597           | 70.39526608                   | 77.05238189               | 4.137113832                        |
| 61.18791154                   | 0.068722567                         | 0.972421537           | 23.08095416                   | 23.69679222               | 3.193630293                        |
| -12.52523608                  | 0.029245185                         | 0.930260279           | 78.88324594                   | 94.40996529               | 3.941587135                        |
| 4.31549479                    | 0.041392358                         | 0.980052503           | 25.10840038                   | 28.46761895               | 3.483532291                        |
| -79.11094462                  | 0.022388594                         | 0.963168889           | 43.44467763                   | 48.54374273               | 3.841706169                        |
| 77.76547975                   | 0.013905151                         | 0.960556528           | 73.92842398                   | 93.58149449               | 4.24684681                         |
| 3.986163177                   | 0.04277413                          | 0.985075158           | 30.3828846                    | 31.62298631               | 3.504833306                        |
| -3.108056605                  | 0.046703633                         | 0.985615632           | 18.47485445                   | 20.11974634               | 3.240617512                        |
| -590.6718698                  | 0.011092971                         | 0.95279178            | 151.4045887                   | 162.2734442               | 4.519011745                        |
| 76.85713532                   | 0.025831569                         | 0.975011017           | 50.11099812                   | 52.40342652               | 3.860862992                        |
| 169.6133294                   | 0.028096186                         | 0.955737466           | 51.98432836                   | 53.85815594               | 3.689697357                        |
| 1586.474771                   | 0.017958142                         | 0.980373724           | 124.4271482                   | 130.8085061               | 4.166970874                        |
| -14.55316032                  | 0.032670277                         | 0.98530863            | 44.30218396                   | 48.68916478               | 3.73874684                         |



| wavelet.HHL_glm_Autocorrelation | wavelet.HHL_glm_SumEntropy | wavelet.HHL_glm_AverageIntensity | wavelet.HHL_glm_Energy | wavelet.HHL_glm_SumSquares | wavelet.HHL_glm_ClusterProminence |
|---------------------------------|----------------------------|----------------------------------|------------------------|----------------------------|-----------------------------------|
| 564.9568789                     | 4.998019452                | 24.31512426                      | 0.004124047            | 39.31267791                | 24398.67046                       |
| 338.2243866                     | 4.225932815                | 18.6531822                       | 0.014003446            | 13.38686037                | 3922.821441                       |
| 313.3558873                     | 4.656238389                | 18.1828451                       | 0.005615705            | 25.106046                  | 8574.805854                       |
| 1888.219712                     | 5.072002221                | 44.07073316                      | 0.004049978            | 42.78803784                | 57509.18198                       |
| 75.02009434                     | 3.961990499                | 8.639041252                      | 0.012932696            | 7.709613547                | 835.538146                        |
| 182.8548096                     | 4.317077869                | 13.54828714                      | 0.008056191            | 13.6085523                 | 2495.464989                       |
| 329.6287792                     | 4.676854481                | 18.71952235                      | 0.006112816            | 28.52060538                | 11742.96016                       |
| 418.5109741                     | 5.046793503                | 20.88884333                      | 0.003511836            | 37.57263202                | 23624.34702                       |
| 647.3797182                     | 4.736763469                | 25.8692361                       | 0.005377034            | 25.35277372                | 14653.67703                       |
| 502.2537375                     | 4.75718366                 | 22.67745138                      | 0.005228828            | 24.63002653                | 10811.38981                       |
| 343.364153                      | 4.498603717                | 18.89654443                      | 0.006494876            | 18.25495164                | 5609.227276                       |
| 464.9032264                     | 4.835938859                | 21.89506801                      | 0.004782748            | 27.08074196                | 12274.90382                       |
| 2062.486543                     | 4.887987033                | 45.84919452                      | 0.005293834            | 34.75094754                | 54021.45421                       |
| 182.7005127                     | 4.117878515                | 13.5119899                       | 0.011042181            | 9.642278205                | 1738.873117                       |
| 374.3476504                     | 4.557932043                | 19.74196608                      | 0.005633817            | 19.90272617                | 6055.225374                       |
| 756.170281                      | 4.224686938                | 27.79015015                      | 0.02645061             | 21.65703709                | 39831.84516                       |
| 133.5054346                     | 3.921494276                | 11.5615791                       | 0.014150132            | 7.671647522                | 956.1307471                       |
| 602.4139377                     | 4.628857336                | 24.7458564                       | 0.008762707            | 21.16725255                | 11767.79677                       |
| 338.991195                      | 4.545633532                | 18.84325702                      | 0.006699055            | 22.19617772                | 9751.575586                       |
| 242.5390263                     | 4.250181777                | 15.7258169                       | 0.013589933            | 13.32782076                | 3355.895666                       |
| 420.0432919                     | 4.459518724                | 20.70210054                      | 0.011873999            | 17.62451                   | 6556.21333                        |
| 269.9843377                     | 4.674027961                | 16.92359449                      | 0.004732173            | 23.82569734                | 7373.850687                       |
| 374.5358563                     | 4.604299376                | 19.67026073                      | 0.006882603            | 20.35712806                | 7591.598028                       |
| 508.0710886                     | 5.105220181                | 23.32448376                      | 0.003897449            | 56.65633094                | 60964.45959                       |
| 1047.22366                      | 4.629945003                | 32.79248281                      | 0.006875431            | 26.59604468                | 21215.47225                       |
| 375.2172734                     | 4.614152084                | 19.62709285                      | 0.006103456            | 21.26461469                | 9022.845451                       |
| 698.3714936                     | 4.640956953                | 26.7721649                       | 0.006240918            | 22.19959863                | 10195.26977                       |
| 338.5784757                     | 4.482844487                | 18.84891611                      | 0.007084734            | 19.80040154                | 5875.108417                       |
| 670.337941                      | 5.204489726                | 26.70089343                      | 0.002858978            | 53.39105729                | 42220.58373                       |
| 242.0128782                     | 4.05190187                 | 15.65554992                      | 0.022261691            | 10.82999661                | 2281.349395                       |
| 266.1695977                     | 4.596698577                | 16.6156335                       | 0.005362147            | 20.36244547                | 5475.124289                       |
| 419.7460879                     | 4.044610393                | 20.60379934                      | 0.019371787            | 9.866319077                | 3012.629599                       |
| 513.1418471                     | 4.808508583                | 22.97992193                      | 0.006464177            | 26.9605503                 | 12415.47092                       |
| 201.8555539                     | 4.378652233                | 14.17761874                      | 0.012798366            | 23.91484701                | 7823.082748                       |
| 302.5365641                     | 4.906739916                | 18.09399294                      | 0.004994969            | 38.71007818                | 17293.81741                       |
| 275.3356416                     | 4.178952405                | 16.74738135                      | 0.010586344            | 11.40849733                | 1868.320998                       |
| 458.9192139                     | 4.705440475                | 21.703436                        | 0.006108787            | 14.4023146                 | 10110.93927                       |
| 307.6979375                     | 4.361318748                | 17.88127341                      | 0.008550702            | 15.01571463                | 3421.68474                        |
| 178.5336353                     | 4.380131703                | 13.40162175                      | 0.00762143             | 15.35576983                | 3966.866631                       |
| 211.9500016                     | 4.423721291                | 14.66014702                      | 0.007779299            | 16.16877557                | 3884.539341                       |
| 507.4003268                     | 4.760149576                | 22.81012793                      | 0.005285034            | 26.43645057                | 11093.21451                       |
| 185.750344                      | 4.19147383                 | 13.66371387                      | 0.009889299            | 11.30907797                | 1885.581226                       |
| 275.6504343                     | 4.230017639                | 16.71041477                      | 0.009484051            | 12.07913559                | 2156.99707                        |
| 380.568219                      | 4.406371604                | 19.79739515                      | 0.007881453            | 15.86821435                | 4433.105808                       |
| 750.1804281                     | 5.001589646                | 27.86890174                      | 0.004245682            | 37.33557714                | 33137.48632                       |
| 336.5940878                     | 4.342486808                | 18.70746496                      | 0.008135124            | 14.68075169                | 3810.787631                       |
| 1725.186859                     | 5.123766923                | 42.17755032                      | 0.003631655            | 48.81216017                | 77863.72655                       |
| 243.9045724                     | 4.661325887                | 15.70227944                      | 0.006107493            | 21.90836295                | 6966.672073                       |
| 133.6275994                     | 4.337702596                | 11.55084483                      | 0.010500738            | 19.14448203                | 4978.268304                       |
| 213.113707                      | 4.930879226                | 15.11354593                      | 0.004281959            | 39.12295088                | 16792.92024                       |
| 276.5120619                     | 4.199001298                | 16.84393165                      | 0.011424614            | 12.35495256                | 2741.004232                       |
| 270.8491707                     | 4.426222611                | 16.65371012                      | 0.007336917            | 16.67200543                | 4368.24548                        |
| 417.1068093                     | 4.75566661                 | 20.6834516                       | 0.004967593            | 23.14163159                | 9100.230305                       |
| 240.9691759                     | 4.594430128                | 15.94818341                      | 0.006053939            | 23.21603827                | 7872.687401                       |
| 458.3051262                     | 4.154249551                | 21.53013564                      | 0.023035414            | 12.79617284                | 4499.89358                        |
| 187.8342739                     | 4.73344209                 | 13.94331819                      | 0.005099014            | 25.57123007                | 7900.654507                       |
| 342.1797519                     | 4.235104104                | 18.78459072                      | 0.009466831            | 12.45294891                | 2834.583555                       |
| 212.2242762                     | 4.479529378                | 14.7622649                       | 0.006533836            | 17.71100303                | 4153.089808                       |
| 379.3034153                     | 4.457990428                | 19.76401694                      | 0.010405562            | 20.1674664                 | 9750.761972                       |
| 758.2592637                     | 4.342283816                | 27.78008609                      | 0.010898833            | 19.81635952                | 15258.56791                       |
| 509.4538705                     | 4.854240193                | 22.93621767                      | 0.005042389            | 29.73415609                | 16537.92926                       |
| 711.0899407                     | 4.952262935                | 27.07480723                      | 0.003897628            | 33.87747601                | 29933.83209                       |
| 298.6962135                     | 4.29450842                 | 17.66785609                      | 0.012868193            | 15.83561226                | 4116.095296                       |
| 208.1683728                     | 3.473086732                | 14.43753764                      | 0.044535075            | 5.109686846                | 803.8522546                       |
| 182.0827743                     | 4.319107834                | 13.49623974                      | 0.010313014            | 15.79034021                | 3714.899616                       |
| 604.4600155                     | 4.810624032                | 25.08310827                      | 0.006157073            | 32.44291316                | 22427.7957                        |
| 409.4005789                     | 4.749604638                | 20.67005836                      | 0.0049578              | 28.05619325                | 10731.62825                       |
| 308.0645756                     | 4.284729328                | 17.80876751                      | 0.010009076            | 13.97312932                | 3702.785564                       |
| 91.24119933                     | 4.124718937                | 9.568294191                      | 0.01073488             | 10.79407329                | 1745.822925                       |
| 708.1539205                     | 4.89814616                 | 27.10279603                      | 0.003858247            | 31.08339753                | 16093.20238                       |
| 211.9547283                     | 3.960042966                | 14.6062279                       | 0.016966474            | 8.419665503                | 1256.362499                       |
| 157.9848041                     | 3.975456823                | 12.56592586                      | 0.014238076            | 7.921803006                | 1048.152933                       |
| 607.4814709                     | 4.034953344                | 24.83545892                      | 0.019016305            | 10.82360481                | 3480.615335                       |
| 650.8883347                     | 4.166732912                | 25.80220505                      | 0.018223091            | 14.1749797                 | 5450.383985                       |
| 937.9760823                     | 4.774347556                | 31.0179737                       | 0.006727885            | 28.80579228                | 20487.15244                       |
| 376.8572725                     | 4.63330015                 | 19.71684599                      | 0.005321293            | 21.51039807                | 8630.165782                       |
| 417.4518396                     | 4.786608623                | 20.8048925                       | 0.004925229            | 26.28567418                | 13735.07871                       |
| 243.8548095                     | 4.647240786                | 15.83293321                      | 0.005926389            | 22.32304122                | 8211.545417                       |
| 338.334977                      | 4.488511507                | 18.66270949                      | 0.007275719            | 17.18179703                | 6484.515212                       |
| 750.6232803                     | 4.871455085                | 27.82846201                      | 0.004442051            | 29.11882044                | 17681.53815                       |
| 276.0293053                     | 4.620592878                | 17.0444436                       | 0.007133313            | 25.28402382                | 10295.89165                       |
| 416.7403534                     | 4.931394639                | 20.83005322                      | 0.003580417            | 31.92393756                | 13887.87064                       |
| 716.4875795                     | 5.169813214                | 27.39984011                      | 0.002797788            | 44.5272584                 | 30265.92347                       |
| 373.7156356                     | 4.297885075                | 19.62212154                      | 0.012218818            | 22.8563398                 | 16144.93894                       |
| 414.8023298                     | 4.606106328                | 20.63478404                      | 0.006636092            | 20.2074073                 | 7805.997277                       |
| 461.6395719                     | 4.6212207                  | 21.65634659                      | 0.005962975            | 19.03123086                | 6667.009601                       |
| 554.0317231                     | 4.62648615                 | 23.93114041                      | 0.005982655            | 23.96821017                | 10885.61199                       |
| 418.8057864                     | 5.024375381                | 20.97468466                      | 0.00299161             | 36.86923363                | 18376.12476                       |
| 139.3817765                     | 3.972195671                | 11.86867202                      | 0.019769747            | 12.32996425                | 3294.28491                        |
| 271.0955787                     | 4.616652579                | 17.12444417                      | 0.011914784            | 45.2985108                 | 20781.62875                       |
| 272.8977073                     | 4.266121437                | 16.7772237                       | 0.011130243            | 13.75971863                | 3404.48574                        |
| 367.2846825                     | 4.656501963                | 19.56201814                      | 0.005712673            | 22.81835527                | 7592.805478                       |
| 542.13965                       | 5.013255371                | 23.8956345                       | 0.003575976            | 41.98876395                | 22818.53733                       |
| 372.7868356                     | 4.367753486                | 19.48556641                      | 0.012128651            | 15.15381436                | 5550.838595                       |
| 417.370414                      | 4.05101714                 | 20.58771888                      | 0.015164856            | 9.221216826                | 1923.397606                       |
| 867.1559774                     | 5.312382007                | 30.35272806                      | 0.004160227            | 76.77319689                | 88557.29573                       |
| 474.7063025                     | 4.737211139                | 22.07131098                      | 0.006166452            | 25.60488203                | 12796.30274                       |
| 193.0946306                     | 4.421494541                | 14.13933275                      | 0.011150825            | 27.94545418                | 10943.57517                       |
| 812.655794                      | 4.937302647                | 29.15780313                      | 0.005637595            | 64.63538451                | 170598.079                        |
| 755.594587                      | 4.558097473                | 27.81731538                      | 0.009072593            | 23.19541355                | 12941.41793                       |



| wavelet.HHL_firstorder_Skewness | wavelet.HHL_firstorder_Uniformity | wavelet.HHL_firstorder_MeanAbsoluteDeviation | wavelet.HHL_firstorder_Energy | wavelet.HHL_firstorder_RobustMeanAbsoluteDeviation |
|---------------------------------|-----------------------------------|----------------------------------------------|-------------------------------|----------------------------------------------------|
| 0.24146388                      | 0.053760162                       | 113.9080233                                  | 16896953.68                   | 70.60314907                                        |
| 0.044087968                     | 0.104077976                       | 61.91862776                                  | 16492635.38                   | 35.40765534                                        |
| 0.108250922                     | 0.05699845                        | 102.6205085                                  | 7433118.126                   | 70.00987468                                        |
| -0.324462036                    | 0.058063652                       | 111.1544279                                  | 67098864.23                   | 65.614154                                          |
| 0.163489972                     | 0.104103786                       | 54.32280811                                  | 1716494.944                   | 37.18241301                                        |
| 0.06769208                      | 0.08209235                        | 70.9306355                                   | 5457963.079                   | 46.89387394                                        |
| 0.119026945                     | 0.059655364                       | 101.4108485                                  | 5993085.445                   | 66.51616653                                        |
| 0.092266883                     | 0.052581464                       | 112.4577763                                  | 22207387.54                   | 72.62802557                                        |
| 0.108660172                     | 0.067914538                       | 88.96357287                                  | 31048488.96                   | 55.53209429                                        |
| -0.057656572                    | 0.068343307                       | 88.15759857                                  | 45325740.41                   | 54.52075023                                        |
| -0.013344029                    | 0.070912332                       | 82.63887941                                  | 9409529.229                   | 55.77453995                                        |
| -0.00727461                     | 0.064779149                       | 92.82120453                                  | 23258212.75                   | 58.49575914                                        |
| 0.148993028                     | 0.066025243                       | 96.33837954                                  | 42227067.74                   | 56.14820131                                        |
| -0.053221954                    | 0.09803156                        | 58.67973526                                  | 6560639.251                   | 38.95302019                                        |
| -0.130017452                    | 0.069362024                       | 83.94834248                                  | 11201935.09                   | 55.21933686                                        |
| 1.264147699                     | 0.145797701                       | 59.98453284                                  | 87803058.56                   | 25.4143138                                         |
| 0.167335561                     | 0.110319291                       | 52.88324907                                  | 3335453.155                   | 35.45698551                                        |
| -0.169093744                    | 0.085494088                       | 75.57008223                                  | 27563861.55                   | 43.29291409                                        |
| 0.018603345                     | 0.070960428                       | 86.1899731                                   | 8187626.448                   | 52.67310386                                        |
| 0.195960284                     | 0.106950506                       | 59.70798534                                  | 20552775.07                   | 34.52594501                                        |
| -0.05569569                     | 0.094361429                       | 70.58874111                                  | 54677505.49                   | 40.21627685                                        |
| 0.08637722                      | 0.062347215                       | 92.59261309                                  | 24962169.92                   | 61.60667091                                        |
| 0.053486977                     | 0.078160738                       | 79.56310877                                  | 33505467.17                   | 48.2356207                                         |
| 0.403943642                     | 0.045249632                       | 136.8085965                                  | 16567486.4                    | 86.12450356                                        |
| -0.292036337                    | 0.070691825                       | 90.39311233                                  | 20319918.73                   | 53.25177207                                        |
| 0.175047758                     | 0.069662567                       | 85.55493379                                  | 9271845.772                   | 55.25301017                                        |
| 0.233116541                     | 0.075385852                       | 81.27772662                                  | 44737738.23                   | 49.2022258                                         |
| -0.015502824                    | 0.069570862                       | 85.06139857                                  | 18480795.58                   | 54.39494942                                        |
| -0.041594609                    | 0.041417554                       | 142.8654375                                  | 58775693.62                   | 99.20011858                                        |
| 0.017757643                     | 0.129127898                       | 52.60909248                                  | 15294453.57                   | 29.11971203                                        |
| 0.086661119                     | 0.070581645                       | 82.5372846                                   | 37549994.09                   | 53.8797784                                         |
| -0.04850279                     | 0.128105355                       | 51.35926778                                  | 34125984.11                   | 28.72462904                                        |
| 0.15731958                      | 0.064450826                       | 92.22604398                                  | 31653222.45                   | 58.13935304                                        |
| -0.36604109                     | 0.075443787                       | 89.28410072                                  | 1446741.193                   | 56.74175457                                        |
| 0.122448735                     | 0.050338866                       | 120.0665437                                  | 7892692.204                   | 79.53937689                                        |
| 0.054299644                     | 0.101131752                       | 58.48617051                                  | 12580034.47                   | 37.0950917                                         |
| 0.207352479                     | 0.069998794                       | 87.13590256                                  | 40881658.69                   | 54.04050404                                        |
| -0.047312048                    | 0.086179106                       | 69.82894442                                  | 30258522.54                   | 43.56382229                                        |
| 0.119522516                     | 0.077944709                       | 75.2225599                                   | 8110504.742                   | 49.29451371                                        |
| 0.07993215                      | 0.081211304                       | 72.82870713                                  | 10090395.52                   | 45.94183053                                        |
| 0.209899484                     | 0.065033166                       | 92.74966416                                  | 23389166.31                   | 58.08869071                                        |
| 0.045385074                     | 0.094446322                       | 61.96380737                                  | 6465115.359                   | 40.01190753                                        |
| -0.196587252                    | 0.094335508                       | 61.8879679                                   | 11219974.85                   | 39.71379278                                        |
| 0.334305877                     | 0.083250446                       | 72.55233233                                  | 10071491.21                   | 45.34038819                                        |
| 0.092378297                     | 0.058984645                       | 105.3170612                                  | 40110629.04                   | 63.74223607                                        |
| -0.2169595                      | 0.084371747                       | 69.95755387                                  | 20084336.93                   | 44.1213245                                         |
| 0.402552645                     | 0.056056359                       | 114.6832764                                  | 119249015.9                   | 66.8665039                                         |
| -0.123614217                    | 0.067371995                       | 88.14598473                                  | 7722150.188                   | 57.55426443                                        |
| 0.020335757                     | 0.073067498                       | 84.43994066                                  | 1504209.15                    | 56.92086681                                        |
| 0.409560847                     | 0.054285471                       | 113.5616457                                  | 10495631.04                   | 76.06617412                                        |
| 0.091513107                     | 0.103615763                       | 59.23902495                                  | 23447423.99                   | 35.89778924                                        |
| -0.022422001                    | 0.079536034                       | 74.09108151                                  | 8025027.34                    | 47.96710928                                        |
| 0.063787448                     | 0.067316044                       | 87.99981174                                  | 53216704.83                   | 55.90310274                                        |
| 0.179243528                     | 0.067020536                       | 88.9804806                                   | 8254513.338                   | 57.65853485                                        |
| -0.288171478                    | 0.141518206                       | 51.57768789                                  | 42880967.39                   | 25.90162978                                        |
| 0.35940609                      | 0.065685098                       | 90.44633462                                  | 12590075.76                   | 57.73182215                                        |
| 0.023179545                     | 0.089874947                       | 65.95588187                                  | 17295383.57                   | 41.76076754                                        |
| -0.086960622                    | 0.077751639                       | 75.81303688                                  | 13084752.15                   | 48.69965113                                        |
| -0.106564578                    | 0.0846217                         | 79.10726637                                  | 10902686.6                    | 44.1565806                                         |
| 0.58175457                      | 0.094896549                       | 67.97320352                                  | 9511875.825                   | 39.07584172                                        |
| 0.019809726                     | 0.065816126                       | 94.31396841                                  | 36585083.88                   | 56.6739404                                         |
| 0.215169174                     | 0.060471099                       | 99.91778114                                  | 104525410.9                   | 62.07125167                                        |
| 0.117444938                     | 0.100285921                       | 66.18251927                                  | 28270871.2                    | 37.85503882                                        |
| -0.215663839                    | 0.187195954                       | 35.88994918                                  | 8640279.944                   | 18.55334188                                        |
| -0.182077105                    | 0.08458451                        | 71.65808294                                  | 1997362.219                   | 45.17334003                                        |
| 0.054962279                     | 0.070156053                       | 94.2635013                                   | 29154664.97                   | 53.36541385                                        |
| -0.010862911                    | 0.05521915                        | 104.3046508                                  | 7029602.06                    | 71.05878873                                        |
| 0.078204836                     | 0.099057032                       | 62.01914753                                  | 24224571.98                   | 37.40502167                                        |
| 0.465629337                     | 0.093607352                       | 62.55072439                                  | 2946580.559                   | 41.94516475                                        |
| 0.042316788                     | 0.05689172                        | 102.9397287                                  | 37383635.43                   | 66.9565212                                         |
| 0.108869883                     | 0.119975762                       | 50.72028793                                  | 15224156.44                   | 30.61259012                                        |
| 0.054278491                     | 0.112437149                       | 52.87662437                                  | 5625062.197                   | 33.68363026                                        |
| 0.086052712                     | 0.129901861                       | 51.43260881                                  | 30946831.26                   | 28.31174544                                        |
| -0.112282062                    | 0.12187846                        | 58.70493531                                  | 54909291.59                   | 30.54176135                                        |
| 0.145353584                     | 0.075784409                       | 86.9916378                                   | 147880124.1                   | 49.47541603                                        |
| 0.187692263                     | 0.069219627                       | 85.0295508                                   | 14107853.6                    | 56.05620612                                        |
| -0.449990145                    | 0.063739441                       | 94.24197567                                  | 17907471.82                   | 59.65593833                                        |
| 0.186427963                     | 0.067417361                       | 86.62791703                                  | 7800984.07                    | 57.21845831                                        |
| 0.160751184                     | 0.081093397                       | 75.00019846                                  | 18953820.44                   | 45.999036                                          |
| -0.136921686                    | 0.061099426                       | 98.44038002                                  | 50803846.91                   | 62.30204851                                        |
| 0.039811031                     | 0.06856261                        | 91.77165522                                  | 7938120.748                   | 56.62363717                                        |
| 0.144053064                     | 0.056014049                       | 103.8354418                                  | 24850809.19                   | 68.24902648                                        |
| 0.043047189                     | 0.050168153                       | 119.6572134                                  | 71717367.18                   | 76.24926958                                        |
| -1.226018341                    | 0.08451843                        | 86.04194757                                  | 2262354.71                    | 47.74147664                                        |
| -0.03805067                     | 0.078855586                       | 77.24498868                                  | 38966113.24                   | 47.01660262                                        |
| -0.111979163                    | 0.074986354                       | 78.82986675                                  | 61649594.56                   | 49.92818059                                        |
| 0.115836999                     | 0.06621685                        | 90.89778613                                  | 12017744.57                   | 57.430285                                          |
| 0.158469262                     | 0.050450367                       | 114.5751601                                  | 33967112.83                   | 77.13997653                                        |
| 0.552698598                     | 0.110394458                       | 63.23861287                                  | 1486103.473                   | 37.84684461                                        |
| 0.079606459                     | 0.052335601                       | 132.820509                                   | 3125473.295                   | 86.64261285                                        |
| 0.097191685                     | 0.098605403                       | 62.81992101                                  | 31066277.79                   | 37.59960661                                        |
| -0.23221937                     | 0.063935992                       | 92.70840079                                  | 10239421.94                   | 61.98545045                                        |
| 0.216224966                     | 0.051623577                       | 115.9653601                                  | 24551210.84                   | 73.94255491                                        |
| 0.079902731                     | 0.100106766                       | 64.35150725                                  | 36237238.41                   | 36.66746388                                        |
| -0.119754793                    | 0.117152377                       | 53.16420395                                  | 33048078.63                   | 31.47223276                                        |
| -0.27855273                     | 0.03722914                        | 161.9367164                                  | 11109297.83                   | 107.1903114                                        |
| 0.148301393                     | 0.071091586                       | 86.79146608                                  | 17779894.66                   | 52.73559201                                        |
| 0.585829975                     | 0.073567321                       | 93.81148262                                  | 1808768.195                   | 61.70844465                                        |
| 1.257364378                     | 0.058792406                       | 123.5099187                                  | 14299477.96                   | 65.24285026                                        |
| -0.079992858                    | 0.08183813                        | 80.52300178                                  | 11352835.44                   | 45.45808467                                        |



| wavelet.HHL_firstorder_Median | wavelet.HHL_firstorder_TotalEnergy | wavelet.HHL_firstorder_Maximum | wavelet.HHL_firstorder_RootMeanSquared | wavelet.HHL_firstorder_90Percentile | wavelet.HHL_firstorder_Minimum |
|-------------------------------|------------------------------------|--------------------------------|----------------------------------------|-------------------------------------|--------------------------------|
| 3.90663263                    | 456217749.3                        | 644.847398                     | 154.7041116                            | 192.2067135                         | -554.7051769                   |
| 0.363951596                   | 445301155.4                        | 448.6571465                    | 89.11006914                            | 95.53232367                         | -443.6863415                   |
| 1.764529355                   | 200694189.4                        | 442.2529226                    | 130.8701658                            | 168.1371369                         | -406.8964195                   |
| 0.47462053                    | 1811669334                         | 717.696108                     | 159.5758898                            | 179.9599738                         | -1051.516662                   |
| 1.702677728                   | 46345363.48                        | 190.5764121                    | 69.14711103                            | 97.79845435                         | -175.8341267                   |
| -3.335626897                  | 147365003.1                        | 333.1327425                    | 92.13185392                            | 120.4209359                         | -303.6964383                   |
| -5.868852153                  | 161813307                          | 475.2120379                    | 133.3553011                            | 154.3783155                         | -431.1152286                   |
| 2.528035974                   | 599599463.7                        | 557.5919147                    | 148.8726349                            | 186.7271657                         | -494.4486012                   |
| -0.331845346                  | 838309201.8                        | 660.2952546                    | 122.2061296                            | 135.5774985                         | -613.7407285                   |
| -2.02497887                   | 1223794991                         | 532.8392088                    | 120.9572061                            | 141.2135638                         | -527.4018583                   |
| -4.775077196                  | 254057289.2                        | 366.8948045                    | 106.6672732                            | 139.3552585                         | -431.2763489                   |
| 4.332351186                   | 627971744.4                        | 651.6338435                    | 125.2749008                            | 152.9931901                         | -521.1921507                   |
| -0.793342154                  | 1140130829                         | 1046.948618                    | 142.6891945                            | 150.6812162                         | -1111.201639                   |
| 2.021387545                   | 177137259.8                        | 369.5600616                    | 76.60412869                            | 89.62840385                         | -302.0895243                   |
| 5.250837626                   | 302452247.4                        | 429.9888147                    | 110.8887116                            | 128.8398272                         | -455.9876307                   |
| 0.143325911                   | 2370682581                         | 322.596359                     | 112.4232595                            | 86.87656501                         | -666.7570969                   |
| 0.746560046                   | 90057235.18                        | 342.4380493                    | 69.12731864                            | 89.37053052                         | -266.4791395                   |
| -1.413674885                  | 744224261.7                        | 456.1965227                    | 108.719077                             | 108.719077                          | -179.2882779                   |
| 3.181498059                   | 221065914.1                        | 450.1545412                    | 118.6089654                            | 143.0029777                         | -438.5149066                   |
| -1.259391018                  | 554924927                          | 900.0079798                    | 85.66012036                            | 96.82185407                         | -356.4605147                   |
| 0.151675087                   | 1476292648                         | 599.9969111                    | 102.3063905                            | 121.1005666                         | -484.1852448                   |
| 1.972795271                   | 673978587.8                        | 505.6812756                    | 120.4694546                            | 141.603574                          | -390.4374846                   |
| -2.433359588                  | 904647613.6                        | 476.2051988                    | 110.7635812                            | 127.2173917                         | -457.7256624                   |
| -5.845175617                  | 447322132.7                        | 799.2083525                    | 185.5905134                            | 216.828835                          | -547.2283359                   |
| -0.699440362                  | 548637805.6                        | 632.9486404                    | 129.9115426                            | 148.4989701                         | -778.92741                     |
| -2.313277494                  | 250339835.9                        | 672.9530274                    | 115.5855022                            | 134.9034411                         | -466.2329386                   |
| -0.732873031                  | 1207918932                         | 759.086643                     | 113.6116148                            | 134.9908584                         | -635.6729777                   |
| 1.218729771                   | 498981480.8                        | 408.4902473                    | 113.5630993                            | 145.4020066                         | -428.5233554                   |
| 18.81639812                   | 1586943728                         | 677.3555142                    | 182.4847289                            | 225.3589935                         | -607.9920659                   |
| -0.792788641                  | 412950246.5                        | 394.9116648                    | 77.56739557                            | 90.87267951                         | -369.1074541                   |
| -4.490138548                  | 1013849841                         | 442.4272555                    | 108.6825132                            | 125.0701988                         | -399.4775631                   |
| 0.223337526                   | 921401571.1                        | 473.8918157                    | 75.86042046                            | 86.85306409                         | -494.4181996                   |
| -3.19600434                   | 854637006                          | 575.9894258                    | 124.778648                             | 154.9818624                         | -542.8656084                   |
| -1.312902267                  | 39602012.21                        | 248.2932847                    | 117.944788                             | 165.9823931                         | -332.8665307                   |
| -1.159614653                  | 213102689.5                        | 481.5168285                    | 154.1855029                            | 195.9129184                         | -423.8850637                   |
| -0.923771082                  | 339660930.6                        | 371.3772939                    | 78.91603027                            | 100.0005436                         | -377.8160197                   |
| -4.686755171                  | 1103804785                         | 572.8231643                    | 119.142857                             | 151.0714333                         | -508.9689608                   |
| 0.608183136                   | 816980108.6                        | 436.2884316                    | 94.98222308                            | 115.6113773                         | -409.4473274                   |
| -2.360118373                  | 218983628                          | 350.9292404                    | 98.55546323                            | 112.1796416                         | -310.7607629                   |
| -1.464061601                  | 272440679.1                        | 368.9084611                    | 98.07681432                            | 122.1685598                         | -337.5173754                   |
| -4.785465238                  | 631507490.3                        | 547.2743359                    | 125.9675345                            | 154.2309171                         | -539.3750798                   |
| 1.71809005                    | 174558114.7                        | 393.464617                     | 82.36480773                            | 99.47049978                         | -310.3065266                   |
| 1.851289876                   | 302939321                          | 334.3084579                    | 82.66265792                            | 98.70815354                         | -393.3602963                   |
| 3.045780023                   | 271930262.6                        | 453.0582209                    | 99.12540078                            | 117.249047                          | -473.3010723                   |
| -4.326371587                  | 1082986984                         | 571.2312633                    | 146.1443205                            | 174.397963                          | -666.1413174                   |
| 0.086517047                   | 542277097.1                        | 406.9027204                    | 94.94479386                            | 107.0563689                         | -442.5806122                   |
| -0.983638007                  | 3219723428                         | 1184.650741                    | 167.192571                             | 184.0506601                         | -1019.243385                   |
| -0.56565604                   | 208498055.1                        | 323.2242222                    | 115.0892724                            | 147.7656303                         | -360.1401825                   |
| -3.556079475                  | 40613647.05                        | 264.8375025                    | 105.9501837                            | 147.527003                          | -265.0641529                   |
| -10.94882629                  | 283382038.2                        | 481.4260667                    | 145.3202323                            | 194.6238456                         | -348.5451682                   |
| -0.414125173                  | 633080447.9                        | 418.6533794                    | 82.75241758                            | 97.98240237                         | -392.6354827                   |
| -1.734883633                  | 216675738.2                        | 396.2965585                    | 98.50777405                            | 115.5241109                         | -382.1469723                   |
| -1.046470187                  | 1436851030                         | 501.0846536                    | 118.0145272                            | 145.9547188                         | -478.1816905                   |
| 4.585540336                   | 222871860.1                        | 542.2531787                    | 118.1821799                            | 118.1821799                         | -361.7795789                   |
| 0.021856092                   | 1157786119                         | 579.1626257                    | 81.07904001                            | 82.89724087                         | -503.1361336                   |
| -3.030700091                  | 339932045.4                        | 454.6549819                    | 119.6794912                            | 152.5095255                         | -324.4556464                   |
| 1.073376947                   | 466975356.5                        | 433.2265448                    | 88.80671043                            | 105.7693562                         | -448.5248126                   |
| 0.752167953                   | 353288308.1                        | 496.6998072                    | 100.5966429                            | 120.3342683                         | -345.7921732                   |
| -0.013251061                  | 294372538.1                        | 479.3340823                    | 115.732294                             | 125.8566414                         | -458.5614435                   |
| 0.909911219                   | 256820647.3                        | 794.3455003                    | 103.9070779                            | 105.0654425                         | -669.945433                    |
| -1.396327667                  | 987797264.7                        | 581.910662                     | 131.3973326                            | 149.7554701                         | -543.8769795                   |
| 0.257902132                   | 2822186095                         | 679.6409051                    | 138.13379                              | 166.9920762                         | -630.5185067                   |
| -1.923002964                  | 763313522.5                        | 497.5971129                    | 95.65118534                            | 105.272606                          | -411.3766902                   |
| -0.11671136                   | 23287558.5                         | 233.25726906                   | 56.2474783                             | 53.23808272                         | -347.7189456                   |
| 0.511400353                   | 53928779.9                         | 285.0193177                    | 95.93974248                            | 103.844246                          | -300.6445092                   |
| -2.487988691                  | 787175954.1                        | 635.5563852                    | 137.0150582                            | 160.1468711                         | -580.4622282                   |
| 2.596068329                   | 189799255.6                        | 469.3770078                    | 133.572563                             | 173.4007924                         | -475.6234668                   |
| -1.165920291                  | 654063443.5                        | 421.106827                     | 87.04758725                            | 100.4414108                         | -412.2870385                   |
| 3.43141056                    | 79557675.09                        | 350.1564787                    | 81.28150385                            | 104.0388675                         | -219.9137413                   |
| 2.949119226                   | 1009358156                         | 723.7490405                    | 136.3435919                            | 176.2290469                         | -629.5914155                   |
| -0.619477893                  | 411052223.8                        | 430.5286281                    | 70.76684391                            | 82.31510489                         | -340.7710434                   |
| -0.884688556                  | 151876679.3                        | 249.8020175                    | 70.58569472                            | 88.88185055                         | -299.522861                    |
| -0.802029585                  | 835564443.9                        | 566.4540196                    | 77.38322779                            | 91.5493911                          | -583.9548459                   |
| -0.433710081                  | 1482550873                         | 550.7240083                    | 90.42063999                            | 99.89568226                         | -600.3607866                   |
| -1.339537412                  | 3992763350                         | 679.3431525                    | 126.9210226                            | 147.3927826                         | -748.8495605                   |
| -0.039813173                  | 380912047.1                        | 655.5809284                    | 112.4341846                            | 134.5108326                         | -453.7660058                   |
| 10.68401237                   | 443501739.1                        | 423.7435836                    | 126.6165721                            | 151.7744831                         | -497.1994287                   |
| -0.407609276                  | 210626569.9                        | 459.3587172                    | 113.0862435                            | 146.866368                          | -368.441298                    |
| 0.372160241                   | 511753151.9                        | 568.9052584                    | 103.6571086                            | 119.1358991                         | -446.9574983                   |
| 0.566309167                   | 1371703867                         | 684.0652704                    | 133.6075042                            | 159.5736586                         | -660.7066467                   |
| -1.297550819                  | 214329260.2                        | 471.2548625                    | 125.4999585                            | 145.3133665                         | -392.5893454                   |
| -3.64903303                   | 670971848.1                        | 591.233933                     | 136.1306375                            | 174.1943659                         | -487.7671988                   |
| 1.143217792                   | 1936368914                         | 794.0610274                    | 160.2708211                            | 218.2508296                         | -642.9113221                   |
| 1.909887458                   | 61083577.16                        | 260.0763539                    | 124.9097525                            | 113.7556544                         | -456.58897                     |
| -0.693004035                  | 1052085057                         | 571.3636493                    | 107.1962639                            | 124.8339766                         | -497.8231618                   |
| 3.278494224                   | 1664539053                         | 492.1014708                    | 106.1043997                            | 129.3758013                         | -510.4761069                   |
| -6.168601983                  | 324479103.3                        | 625.0291405                    | 124.2858498                            | 136.6171673                         | -562.7469839                   |
| -0.230172349                  | 917112046.3                        | 702.8472486                    | 147.9392656                            | 190.3084555                         | -484.923721                    |
| 12.28772014                   | 40124793.76                        | 384.1250894                    | 90.11539271                            | 109.0218802                         | -259.0537082                   |
| 5.815361991                   | 84387778.97                        | 418.94382                      | 172.5294535                            | 214.9030343                         | -384.0844675                   |
| 0.162302171                   | 838789500.3                        | 476.3067543                    | 88.40484034                            | 102.2804023                         | -390.6633733                   |
| -4.593389276                  | 276464392.5                        | 370.2005499                    | 120.4301894                            | 120.4301894                         | -459.5651424                   |
| -6.773521116                  | 662882692.7                        | 544.5595402                    | 154.9926166                            | 189.2397256                         | -556.1486747                   |
| -1.241460577                  | 623.529914                         | 391.5264384                    | 94.12736314                            | 97.72954521                         | -459.9182064                   |
| 1.140438452                   | 892298123.1                        | 391.5264384                    | 75.44571729                            | 86.10750078                         | -496.8805271                   |
| 7.46896969                    | 299951041.3                        | 601.0682815                    | 209.5477704                            | 253.1597499                         | -700.709333                    |
| 4.042188182                   | 480057155.9                        | 545.4477775                    | 120.919907                             | 146.0070138                         | -517.2159825                   |
| -13.3960348                   | 48836741.25                        | 470.5820736                    | 121.2659576                            | 155.3040317                         | -303.3398391                   |
| -10.55223963                  | 386085905.1                        | 1152.529533                    | 194.2408127                            | 180.2485092                         | -675.800952                    |
| -1.302809566                  | 306526556.8                        | 675.6909453                    | 118.6083881                            | 136.9153887                         | -662.4550741                   |

| wavelet.HHL_firstorder_Entropy | wavelet.HHL_firstorder_StandardDeviation | wavelet.HHL_firstorder_Range | wavelet.HHL_firstorder_Variance | wavelet.HHL_firstorder_10Percentile | wavelet.HHL_firstorder_Kurtosis |
|--------------------------------|------------------------------------------|------------------------------|---------------------------------|-------------------------------------|---------------------------------|
| 4.576558735                    | 154.618924                               | 1199.552575                  | 23907.01165                     | -184.9355311                        | 4.237739378                     |
| 3.745745398                    | 89.10909869                              | 892.343488                   | 7940.431469                     | -105.9216218                        | 5.5120018                       |
| 4.359599263                    | 130.776495                               | 849.149342                   | 17102.49165                     | -145.261387                         | 3.525097248                     |
| 4.570616277                    | 159.5644807                              | 1769.213273                  | 25460.82349                     | -183.541108                         | 6.826155216                     |
| 3.493586541                    | 68.86459557                              | 366.4105388                  | 4742.332524                     | -169.28609569                       | 2.845409555                     |
| 3.889042167                    | 92.12996705                              | 636.8291808                  | 8487.930829                     | -104.188247                         | 3.520427739                     |
| 4.362032646                    | 133.283546                               | 906.3272665                  | 17764.50363                     | -169.7733867                        | 4.031017548                     |
| 4.554523698                    | 148.8433182                              | 1052.040516                  | 22154.33338                     | -176.8292501                        | 3.919326027                     |
| 4.251441005                    | 122.2058801                              | 1274.035983                  | 14934.27712                     | -147.8754794                        | 5.518014285                     |
| 4.253824184                    | 120.9405174                              | 1060.241067                  | 14626.60876                     | -138.4075587                        | 4.713108762                     |
| 4.094383814                    | 106.6533298                              | 798.1711534                  | 11374.93275                     | -123.504561                         | 3.916376585                     |
| 4.305930472                    | 125.2624569                              | 1172.825994                  | 15690.6831                      | -157.5827119                        | 4.421077557                     |
| 4.350864307                    | 142.6881787                              | 2158.150257                  | 20359.91635                     | -144.471961                         | 11.02045297                     |
| 3.639659813                    | 76.60411082                              | 671.6495859                  | 5868.189794                     | -100.4036639                        | 4.035635733                     |
| 4.148047457                    | 110.8880549                              | 885.9764455                  | 12296.16071                     | -139.163572                         | 4.295619007                     |
| 3.569973307                    | 112.4206101                              | 1869.353456                  | 12638.39358                     | -90.41023016                        | 20.85608867                     |
| 3.472298435                    | 69.11513996                              | 608.9171888                  | 4776.902571                     | -79.359054                          | 4.239829871                     |
| 4.023134332                    | 108.7158113                              | 1035.484801                  | 11819.12763                     | -113.8802052                        | 5.666731306                     |
| 4.186653472                    | 118.565681                               | 888.6694477                  | 14057.82071                     | -131.924709                         | 4.867714994                     |
| 3.699678253                    | 85.65951951                              | 786.4684946                  | 7337.553282                     | -96.40014049                        | 5.379263802                     |
| 3.932338363                    | 102.2942398                              | 1084.182156                  | 10464.1115                      | -116.0940052                        | 5.477249033                     |
| 4.285363395                    | 120.4655913                              | 896.1187602                  | 14511.95868                     | -151.7227812                        | 3.77681084                      |
| 4.101373197                    | 110.7591949                              | 933.9308612                  | 12267.59925                     | -133.603605                         | 4.728678927                     |
| 4.802041003                    | 185.5815998                              | 1346.436688                  | 34440.53017                     | -207.078693                         | 4.901267223                     |
| 4.260641145                    | 129.8954386                              | 1411.87605                   | 16872.82497                     | -142.8462762                        | 7.050649804                     |
| 4.154289216                    | 115.5814646                              | 1139.185966                  | 13359.07497                     | -135.4148636                        | 5.7839638                       |
| 4.138129178                    | 113.6087445                              | 1394.759621                  | 12906.94683                     | -129.5515107                        | 5.711627688                     |
| 4.182463041                    | 113.5590311                              | 837.0136028                  | 12895.65354                     | -151.2753911                        | 3.734611138                     |
| 4.849867838                    | 181.7687127                              | 1285.34758                   | 33039.86492                     | -226.9349046                        | 3.228606336                     |
| 3.503453909                    | 77.56691066                              | 764.0191189                  | 6016.625629                     | -86.02566267                        | 5.87428978                      |
| 4.135647563                    | 108.5200754                              | 841.9048186                  | 11776.60676                     | -142.1190282                        | 3.759205232                     |
| 3.48038342                     | 75.8378898                               | 968.3100153                  | 5751.38553                      | -78.76735909                        | 6.662504365                     |
| 4.304259956                    | 124.7743991                              | 1118.855034                  | 15568.65068                     | -140.2991841                        | 4.703450346                     |
| 4.047547027                    | 117.9302939                              | 581.1598154                  | 13907.55422                     | -138.546861                         | 3.385485239                     |
| 4.594616678                    | 154.1697943                              | 905.4018922                  | 23768.32549                     | -183.5823819                        | 3.284650575                     |
| 3.655836977                    | 78.91599971                              | 749.1933136                  | 6227.735011                     | -92.2334297                         | 4.474938394                     |
| 4.227018011                    | 119.1354639                              | 1081.792125                  | 14193.25875                     | -139.9661062                        | 4.6427168949                    |
| 3.91744415                     | 94.98201125                              | 845.735759                   | 9021.582462                     | -115.8395901                        | 4.221888562                     |
| 3.985503711                    | 98.49983751                              | 661.6900033                  | 9702.217989                     | -122.8718807                        | 3.776695053                     |
| 3.963243435                    | 98.07302998                              | 724.4258366                  | 9618.31921                      | -118.2336115                        | 4.103800427                     |
| 4.300229294                    | 125.9569195                              | 1086.649416                  | 15865.14557                     | -143.3231162                        | 4.661755593                     |
| 3.711749644                    | 82.33351087                              | 703.7711796                  | 6778.807013                     | -92.54857412                        | 4.34112741                      |
| 3.739540557                    | 82.66066725                              | 727.6687542                  | 6832.785909                     | -101.1563347                        | 4.219264423                     |
| 3.938625283                    | 98.98289189                              | 926.3592933                  | 9797.612888                     | -108.4443476                        | 4.975042721                     |
| 4.486459257                    | 146.1435183                              | 1237.372581                  | 21357.92793                     | -168.1049696                        | 5.019590604                     |
| 3.91558747                     | 94.90590987                              | 849.4833325                  | 9007.131727                     | -113.3659038                        | 4.805119211                     |
| 4.619909523                    | 167.1899305                              | 2203.894126                  | 27952.47285                     | -183.2378155                        | 7.9338528                       |
| 4.190412712                    | 115.0715305                              | 683.3640047                  | 13241.45714                     | -139.2952424                        | 3.470491155                     |
| 4.023993638                    | 105.9456613                              | 529.9016554                  | 11224.48315                     | -120.5920009                        | 2.979256131                     |
| 4.485996947                    | 145.2826537                              | 829.9712349                  | 21107.04948                     | -174.18219                          | 3.206452834                     |
| 3.685933631                    | 82.7471367                               | 811.2888622                  | 6847.088633                     | -93.86613709                        | 5.336096984                     |
| 3.971097977                    | 98.49693025                              | 778.4435309                  | 9701.645269                     | -120.2738224                        | 4.299842623                     |
| 4.244474602                    | 118.0113961                              | 979.2663441                  | 13926.6896                      | -137.5535818                        | 4.182090355                     |
| 4.212834256                    | 118.1756767                              | 904.0327576                  | 13965.49057                     | -140.2459751                        | 4.248655815                     |
| 3.464744989                    | 81.06430684                              | 1082.298759                  | 6571.421843                     | -87.046632                          | 7.573169536                     |
| 4.243754038                    | 119.6547434                              | 779.1106283                  | 14317.25761                     | -141.2868126                        | 3.682200658                     |
| 3.823522715                    | 88.79741514                              | 881.7513574                  | 7884.980936                     | -102.0276129                        | 4.624383612                     |
| 4.009363224                    | 100.5937618                              | 842.4919803                  | 10119.1049                      | -126.980973                         | 4.097510504                     |
| 4.067222084                    | 115.7013658                              | 937.8955258                  | 13386.80605                     | -123.1983938                        | 5.676489045                     |
| 3.842201323                    | 103.9069766                              | 1464.290933                  | 10796.65978                     | -106.2809346                        | 13.61165891                     |
| 4.347960406                    | 131.3972702                              | 1125.787641                  | 17265.24261                     | -153.084404                         | 4.75737428                      |
| 4.429363945                    | 138.0496515                              | 1510.159412                  | 19057.70628                     | -146.7995319                        | 5.694525239                     |
| 3.837001969                    | 95.57079031                              | 908.9738032                  | 9133.77596                      | -119.7514917                        | 5.370305097                     |
| 2.970585529                    | 56.23548748                              | 671.2916362                  | 3162.430053                     | -61.78655771                        | 8.84435115                      |
| 3.888350058                    | 95.9168977                               | 585.6638269                  | 9200.051264                     | -125.0883716                        | 3.89535998                      |
| 4.329955212                    | 137.0149946                              | 1216.018613                  | 18773.10876                     | -144.7891288                        | 5.614000712                     |
| 4.40094206                     | 133.5637109                              | 945.0004746                  | 17839.26487                     | -170.7842399                        | 3.412510534                     |
| 3.753479424                    | 87.04702377                              | 833.3938655                  | 7577.184347                     | -101.350349                         | 5.46288804                      |
| 3.691002879                    | 81.26414756                              | 570.0702199                  | 6603.861678                     | -96.87431956                        | 4.059844697                     |
| 4.448670775                    | 136.0979213                              | 1353.340456                  | 18522.64418                     | -157.6948034                        | 4.294242144                     |
| 3.471458716                    | 70.76614582                              | 771.2996716                  | 5007.847394                     | -83.74708718                        | 5.224543739                     |
| 3.493411588                    | 70.58026937                              | 549.3248786                  | 4981.574424                     | -82.00383362                        | 4.038408086                     |
| 3.479591469                    | 77.35431905                              | 1150.408866                  | 5983.690675                     | -75.48191352                        | 8.442002514                     |
| 3.651562754                    | 90.41727837                              | 1151.084795                  | 8175.284228                     | -97.4465377                         | 7.468644203                     |
| 4.232402287                    | 126.9149368                              | 1428.192713                  | 16107.40119                     | -136.6853226                        | 6.199136601                     |
| 4.159181489                    | 112.4333739                              | 1019.346934                  | 12641.26358                     | -131.4296495                        | 4.654057391                     |
| 4.305273347                    | 126.5140619                              | 920.9430122                  | 16005.80785                     | -144.4565826                        | 4.360969824                     |
| 4.178524858                    | 113.0600211                              | 827.8000152                  | 12782.56838                     | -134.6672728                        | 3.819532489                     |
| 4.007964331                    | 103.6545862                              | 1015.862757                  | 10744.27325                     | -120.584157                         | 5.417580049                     |
| 4.399924022                    | 133.6036621                              | 1344.771917                  | 17849.93853                     | -168.66947                          | 4.716945761                     |
| 4.249865981                    | 125.489561                               | 863.8442079                  | 15747.62993                     | -149.7781525                        | 4.27760543                      |
| 4.454470472                    | 136.1272278                              | 1079.000592                  | 18530.62214                     | -165.7072949                        | 3.888341341                     |
| 4.662370474                    | 160.0262136                              | 1436.97235                   | 25608.38905                     | -177.0026493                        | 4.134437129                     |
| 3.953508178                    | 123.5938897                              | 716.6653239                  | 15275.44958                     | -152.9340813                        | 5.631195999                     |
| 4.066621745                    | 107.1957886                              | 1069.186811                  | 11490.93709                     | -123.3575744                        | 5.078604902                     |
| 4.088742565                    | 106.0974129                              | 1002.577578                  | 11256.66102                     | -126.8528226                        | 4.411079204                     |
| 4.256230601                    | 124.267785                               | 1187.776124                  | 15442.4824                      | -142.2903399                        | 5.316336349                     |
| 4.580354965                    | 147.8902797                              | 1187.77097                   | 21871.53482                     | -181.4023936                        | 3.598120021                     |
| 3.638053622                    | 89.73917791                              | 643.1787976                  | 8053.120053                     | -96.58395014                        | 5.69243555                      |
| 4.529974781                    | 172.2588833                              | 803.0282875                  | 29673.12288                     | -256.0814531                        | 2.980627903                     |
| 3.774315662                    | 88.40106554                              | 866.9701276                  | 7814.748388                     | -105.5956939                        | 5.268128343                     |
| 4.253887153                    | 120.2955887                              | 829.7656923                  | 14471.02865                     | -160.8339318                        | 3.599950428                     |
| 4.618012506                    | 154.9406415                              | 1100.708215                  | 24006.60238                     | -193.730599                         | 3.8420274                       |
| 3.812358866                    | 94.10281821                              | 1083.44812                   | 8855.340395                     | -106.7903979                        | 6.475981368                     |
| 3.532101938                    | 75.44387505                              | 888.4069655                  | 5691.778282                     | -87.40173169                        | 5.964487718                     |
| 4.999867432                    | 209.5470007                              | 1301.777615                  | 43909.94549                     | -254.8682082                        | 3.665310355                     |
| 4.216082953                    | 120.720249                               | 1062.66376                   | 14573.37852                     | -128.6460205                        | 5.116723274                     |
| 4.115656645                    | 121.1173741                              | 773.9219127                  | 14669.4183                      | -126.4549451                        | 4.397028465                     |
| 4.53082175                     | 194.1580345                              | 1828.330485                  | 37697.34236                     | -167.435528                         | 9.87355847                      |
| 4.083916963                    | 118.602568                               | 1338.146019                  | 14066.56914                     | -118.9453887                        | 7.394834694                     |

| wavelet.HHL_firstorder_Mean | wavelet.HHL_glrIm_ShortRunLowGrayLevelEmphasis | wavelet.HHL_glrIm_GrayLevelVariance | wavelet.HHL_glrIm_LowGrayLevelRunEmphasis | wavelet.HHL_glrIm_GrayLevelNonUniformityNormalized |
|-----------------------------|------------------------------------------------|-------------------------------------|-------------------------------------------|----------------------------------------------------|
| 5.133273914                 | 0.003871918                                    | 39.44404749                         | 0.00394215                                | 0.052136586                                        |
| -0.415876038                | 0.003791364                                    | 13.83599635                         | 0.00402655                                | 0.095222215                                        |
| 4.950620165                 | 0.00779747                                     | 27.99206785                         | 0.007927778                               | 0.056271923                                        |
| -1.908169758                | 0.000992706                                    | 42.73184961                         | 0.00101515                                | 0.054882545                                        |
| 6.244232504                 | 0.021805516                                    | 7.927899997                         | 0.022874954                               | 0.101120833                                        |
| 0.589641495                 | 0.009011295                                    | 13.97161048                         | 0.009315961                               | 0.079881129                                        |
| -4.374094593                | 0.008122765                                    | 29.39139792                         | 0.008235536                               | 0.058485065                                        |
| 2.95432633                  | 0.006317545                                    | 36.63073324                         | 0.006409018                               | 0.051465452                                        |
| 0.246988526                 | 0.0022655                                      | 25.02148224                         | 0.002339369                               | 0.065863049                                        |
| -2.009217131                | 0.002804709                                    | 24.47852599                         | 0.002899506                               | 0.065867229                                        |
| 1.724651031                 | 0.004997318                                    | 18.8643694                          | 0.005147857                               | 0.069369672                                        |
| 1.765695008                 | 0.003361762                                    | 26.13414061                         | 0.003463712                               | 0.062801846                                        |
| -0.538409533                | 0.001018709                                    | 34.10012652                         | 0.001041965                               | 0.06367775                                         |
| 0.05233314                  | 0.007440912                                    | 10.01718198                         | 0.007829784                               | 0.094861843                                        |
| -0.381624957                | 0.004474272                                    | 20.36189204                         | 0.004587538                               | 0.067808765                                        |
| 0.771818441                 | 0.001727596                                    | 23.18647485                         | 0.001864028                               | 0.125823071                                        |
| 1.29754025                  | 0.010692171                                    | 8.135407129                         | 0.011268306                               | 0.105116215                                        |
| 0.842663438                 | 0.00228953                                     | 20.35263732                         | 0.002404213                               | 0.080392649                                        |
| 3.204055879                 | 0.006117533                                    | 23.44850892                         | 0.006264435                               | 0.069144866                                        |
| -0.320840525                | 0.005845174                                    | 12.84508067                         | 0.006174572                               | 0.09849277                                         |
| 1.57671427                  | 0.002997149                                    | 18.2582138                          | 0.003173672                               | 0.08522955                                         |
| -0.96478372                 | 0.006494431                                    | 24.06268744                         | 0.006669963                               | 0.061003241                                        |
| -0.985731633                | 0.003690293                                    | 20.70285996                         | 0.003837612                               | 0.073961211                                        |
| -1.818926351                | 0.006685746                                    | 56.52367289                         | 0.006752514                               | 0.044162515                                        |
| -2.045468527                | 0.001985625                                    | 28.35813936                         | 0.002029226                               | 0.067225395                                        |
| 0.966101689                 | 0.004892845                                    | 22.10058067                         | 0.005008475                               | 0.0678779                                          |
| 0.80758675                  | 0.001826696                                    | 21.80311936                         | 0.001903961                               | 0.072180069                                        |
| 0.961237693                 | 0.004522903                                    | 21.5840181                          | 0.004695841                               | 0.06708983                                         |
| 16.14965475                 | 0.002924223                                    | 54.02754426                         | 0.002996033                               | 0.040799506                                        |
| 0.274273812                 | 0.005716084                                    | 10.89214397                         | 0.006116645                               | 0.113116804                                        |
| -5.939858128                | 0.005784762                                    | 19.61518057                         | 0.005971548                               | 0.068831452                                        |
| 1.848746175                 | 0.002581927                                    | 10.16557191                         | 0.00279307                                | 0.116323397                                        |
| 1.02971325                  | 0.003473169                                    | 25.97694878                         | 0.003568994                               | 0.062441963                                        |
| 1.848997337                 | 0.02869414                                     | 27.9893262                          | 0.028867266                               | 0.073010578                                        |
| 2.200864228                 | 0.010098259                                    | 38.92849619                         | 0.010192732                               | 0.04961989                                         |
| 0.069451278                 | 0.004551893                                    | 10.53917447                         | 0.004804311                               | 0.096614595                                        |
| 1.327264324                 | 0.003032632                                    | 23.82560556                         | 0.003152327                               | 0.066900947                                        |
| 0.200597411                 | 0.004258588                                    | 15.38162471                         | 0.004457972                               | 0.081342683                                        |
| -3.107919123                | 0.009880844                                    | 16.24622389                         | 0.010210356                               | 0.075930223                                        |
| -0.861567169                | 0.008016318                                    | 16.17513861                         | 0.008283771                               | 0.078229151                                        |
| 1.635289789                 | 0.003228576                                    | 26.59320502                         | 0.003331724                               | 0.062504443                                        |
| 2.270361023                 | 0.009279603                                    | 11.43362855                         | 0.009623298                               | 0.091124438                                        |
| 0.573676643                 | 0.004817018                                    | 11.69918221                         | 0.005042558                               | 0.090694322                                        |
| 5.313397378                 | 0.003849258                                    | 16.36359077                         | 0.00398533                                | 0.080489062                                        |
| -0.484248111                | 0.002664543                                    | 35.37011883                         | 0.002756256                               | 0.057183248                                        |
| -2.717012073                | 0.004172034                                    | 15.10199933                         | 0.0043131                                 | 0.081809288                                        |
| 0.93965641                  | 0.000865451                                    | 46.67894275                         | 0.000889129                               | 0.0538178                                          |
| 2.020764678                 | 0.010701084                                    | 21.86079326                         | 0.010943056                               | 0.065345233                                        |
| 0.978910001                 | 0.028881391                                    | 18.49654175                         | 0.029735236                               | 0.071415461                                        |
| 3.304607618                 | 0.014034933                                    | 34.53821028                         | 0.014288289                               | 0.052975052                                        |
| 0.934870375                 | 0.00456112                                     | 11.74851103                         | 0.004823237                               | 0.097642974                                        |
| -1.461601187                | 0.006175808                                    | 16.21322209                         | 0.006361921                               | 0.077357247                                        |
| 0.85967283                  | 0.00356502                                     | 23.34283721                         | 0.003681662                               | 0.065170565                                        |
| 1.23978883                  | 0.010460024                                    | 23.25962368                         | 0.010657365                               | 0.065106642                                        |
| -1.5456021                  | 0.002477262                                    | 11.78085478                         | 0.002671065                               | 0.126888208                                        |
| 2.433720949                 | 0.011708002                                    | 23.73770385                         | 0.011986235                               | 0.064090682                                        |
| 1.284866132                 | 0.003866546                                    | 13.46690979                         | 0.003868786                               | 0.086150249                                        |
| 0.76135893                  | 0.009047889                                    | 17.0184046                          | 0.009327917                               | 0.075552432                                        |
| 2.675412373                 | 0.006237515                                    | 23.18508258                         | 0.006496565                               | 0.078041349                                        |
| -0.145134058                | 0.002588115                                    | 18.62837164                         | 0.00267375                                | 0.089564897                                        |
| 0.12812459                  | 0.003151761                                    | 28.98349379                         | 0.003251039                               | 0.063019022                                        |
| 4.820546326                 | 0.001918775                                    | 31.70643992                         | 0.001981273                               | 0.058796862                                        |
| -3.920879545                | 0.004509355                                    | 15.8563248                          | 0.004729856                               | 0.091870373                                        |
| -1.161362337                | 0.005886451                                    | 5.968980217                         | 0.00649672                                | 0.163517188                                        |
| -2.093543012                | 0.013508006                                    | 15.47040739                         | 0.013794377                               | 0.081855543                                        |
| 0.132023611                 | 0.003375447                                    | 31.56760407                         | 0.003478503                               | 0.066676216                                        |
| -1.537764574                | 0.005742034                                    | 29.20674471                         | 0.005828139                               | 0.054348623                                        |
| -0.31320801                 | 0.004220163                                    | 12.98149704                         | 0.004435532                               | 0.093906369                                        |
| 1.679639593                 | 0.021779255                                    | 11.25473747                         | 0.02253169                                | 0.090498649                                        |
| 8.181128795                 | 0.002144778                                    | 30.6803911                          | 0.002199804                               | 0.055623524                                        |
| 0.314329084                 | 0.00566266                                     | 8.779322863                         | 0.006042951                               | 0.111238435                                        |
| 0.87514251                  | 0.0083702                                      | 8.456095214                         | 0.008849585                               | 0.106715409                                        |
| 2.115010046                 | 0.001890818                                    | 10.66562848                         | 0.00203715                                | 0.117399453                                        |
| -0.779685042                | 0.001724459                                    | 14.52104823                         | 0.001857844                               | 0.108510911                                        |
| 1.242893909                 | 0.001325592                                    | 27.41234309                         | 0.001387153                               | 0.071065303                                        |
| 0.426964321                 | 0.0041714                                      | 20.99888816                         | 0.004300471                               | 0.067817288                                        |
| 5.09396473                  | 0.006056399                                    | 26.48457384                         | 0.006220538                               | 0.062205113                                        |
| 2.435178728                 | 0.007797427                                    | 21.38148525                         | 0.008021187                               | 0.065772418                                        |
| 0.723130847                 | 0.004959391                                    | 18.19170439                         | 0.005122867                               | 0.078016817                                        |
| -1.013237844                | 0.001979766                                    | 29.77857986                         | 0.002042599                               | 0.058601102                                        |
| 1.615441232                 | 0.009690141                                    | 26.01747903                         | 0.009956111                               | 0.065860434                                        |
| 0.963501113                 | 0.004679134                                    | 30.82413319                         | 0.004762273                               | 0.054837761                                        |
| 8.851386864                 | 0.002395441                                    | 42.09438421                         | 0.002450387                               | 0.049123635                                        |
| -18.08304995                | 0.017978003                                    | 25.15404701                         | 0.018631023                               | 0.081936341                                        |
| -0.319228132                | 0.003333251                                    | 19.44454713                         | 0.003459433                               | 0.075666267                                        |
| 1.21762631                  | 0.002738124                                    | 18.88486842                         | 0.002856529                               | 0.072345088                                        |
| -2.11897431                 | 0.003496327                                    | 25.90972849                         | 0.003580984                               | 0.064116947                                        |
| 3.806769002                 | 0.004044709                                    | 35.76783172                         | 0.004127979                               | 0.049598529                                        |
| 8.225810036                 | 0.020715345                                    | 13.87890121                         | 0.021198813                               | 0.100418052                                        |
| -9.658646896                | 0.030897949                                    | 47.96506308                         | 0.031006049                               | 0.051264129                                        |
| -0.816950539                | 0.004919358                                    | 13.53920529                         | 0.005185754                               | 0.091542309                                        |
| -5.692263555                | 0.005050501                                    | 23.80572092                         | 0.005167977                               | 0.062422053                                        |
| -0.4135785                  | 0.00350471                                     | 39.76286234                         | 0.003578176                               | 0.050251104                                        |
| -2.149441241                | 0.00381112                                     | 15.50476258                         | 0.003577649                               | 0.092262476                                        |
| 0.527234213                 | 0.002609698                                    | 9.94105264                          | 0.002800799                               | 0.108748965                                        |
| 0.567971292                 | 0.005961084                                    | 71.41734576                         | 0.005983143                               | 0.036938795                                        |
| 6.945889674                 | 0.003607297                                    | 24.71381991                         | 0.003724427                               | 0.067626507                                        |
| 6.001181421                 | 0.01770271                                     | 24.2366234                          | 0.017917773                               | 0.071846952                                        |
| 5.670180937                 | 0.004772681                                    | 62.5199477                          | 0.004843937                               | 0.056856467                                        |
| 1.174989337                 | 0.002764188                                    | 24.15315351                         | 0.002839601                               | 0.076959906                                        |

| wavelet.HHL_glrIm_RunVariance | wavelet.HHL_glrIm_GrayLevelNonUniformity | wavelet.HHL_glrIm_LongRunEmphasis | wavelet.HHL_glrIm_ShortRunHighGrayLevelEmphasis | wavelet.HHL_glrIm_RunLengthNonUniformity |
|-------------------------------|------------------------------------------|-----------------------------------|-------------------------------------------------|------------------------------------------|
| 0.059146323                   | 35.0173472                               | 1.165274147                       | 580.675384                                      | 612.5127671                              |
| 0.157074795                   | 176.7768711                              | 1.411065067                       | 328.278401                                      | 1519.476944                              |
| 0.048326802                   | 23.34877887                              | 1.142742002                       | 332.3956731                                     | 380.0849479                              |
| 0.077094988                   | 136.1899569                              | 1.205342055                       | 1848.587406                                     | 2224.927357                              |
| 0.095314642                   | 33.36730683                              | 1.281043084                       | 80.26014007                                     | 280.6812056                              |
| 0.074110198                   | 48.0905543                               | 1.21549393                        | 187.9764553                                     | 530.8033828                              |
| 0.045257872                   | 18.8951631                               | 1.135477675                       | 354.9885114                                     | 297.5847999                              |
| 0.050646989                   | 49.21635824                              | 1.148743337                       | 446.5683065                                     | 873.4338765                              |
| 0.070403926                   | 128.6441137                              | 1.204144634                       | 646.1716008                                     | 1733.202707                              |
| 0.070004049                   | 191.8755768                              | 1.201729272                       | 504.9926534                                     | 2590.628571                              |
| 0.064671131                   | 54.16485332                              | 1.18782998                        | 349.7208303                                     | 699.4391777                              |
| 0.069264622                   | 87.56939729                              | 1.19922088                        | 470.5436565                                     | 1241.605963                              |
| 0.074743088                   | 123.7778323                              | 1.214346443                       | 2005.419029                                     | 1718.658574                              |
| 0.102337165                   | 97.11350715                              | 1.296715829                       | 180.3934245                                     | 866.1252632                              |
| 0.062682804                   | 58.4971367                               | 1.179732769                       | 384.0695256                                     | 778.256792                               |
| 0.236925389                   | 754.2698714                              | 1.591241864                       | 705.9632265                                     | 4644.974061                              |
| 0.117405014                   | 66.56143127                              | 1.333391302                       | 132.3286058                                     | 527.9846659                              |
| 0.122264376                   | 170.7130315                              | 1.330904933                       | 583.5021744                                     | 1790.212218                              |
| 0.069450111                   | 37.80892292                              | 1.203024999                       | 353.9634403                                     | 485.2161559                              |
| 0.146532183                   | 248.41065                                | 1.386393943                       | 235.5922241                                     | 2089.179056                              |
| 0.143780412                   | 401.6526898                              | 1.375680397                       | 411.6564927                                     | 3926.521234                              |
| 0.062146662                   | 99.32165715                              | 1.178933447                       | 283.533614                                      | 1466.663926                              |
| 0.09334744                    | 187.6442348                              | 1.254692096                       | 379.1453528                                     | 2215.912147                              |
| 0.04048874                    | 20.44393569                              | 1.120594384                       | 544.1297935                                     | 429.4363238                              |
| 0.076611453                   | 75.99129794                              | 1.212442077                       | 1030.899376                                     | 1005.606489                              |
| 0.065430174                   | 44.49192268                              | 1.187022351                       | 388.0408068                                     | 588.4216521                              |
| 0.087186598                   | 232.6076275                              | 1.245453558                       | 689.7649055                                     | 2812.368224                              |
| 0.085564692                   | 89.52517864                              | 1.241330474                       | 348.8464481                                     | 1169.692275                              |
| 0.06673127                    | 68.53820643                              | 1.177372963                       | 714.0381875                                     | 1539.928258                              |
| 0.208320549                   | 250.4385848                              | 1.530117132                       | 229.2087403                                     | 1742.925124                              |
| 0.066509436                   | 206.3387633                              | 1.192245094                       | 271.8937097                                     | 2680.7927                                |
| 0.172989187                   | 608.648233                               | 1.462488841                       | 396.8918481                                     | 4179.982774                              |
| 0.073333827                   | 119.3291301                              | 1.206193737                       | 512.2351003                                     | 1700.805482                              |
| 0.053489759                   | 7.234583594                              | 1.156285749                       | 223.3801701                                     | 90.29374904                              |
| 0.035473751                   | 15.92171185                              | 1.106904429                       | 338.8064478                                     | 299.9902824                              |
| 0.105674697                   | 178.5592867                              | 1.301416882                       | 265.615588                                      | 1561.689912                              |
| 0.08717585                    | 179.6043797                              | 1.240780871                       | 466.6531581                                     | 2359.726476                              |
| 0.101433839                   | 251.4133814                              | 1.279700168                       | 303.8785164                                     | 2656.365749                              |
| 0.075515024                   | 59.16790087                              | 1.224735716                       | 184.9430093                                     | 681.6308682                              |
| 0.082760511                   | 76.48707706                              | 1.234935963                       | 214.5223643                                     | 856.7114658                              |
| 0.078533649                   | 86.12238699                              | 1.223627411                       | 511.9436032                                     | 1214.01651                               |
| 0.096942758                   | 80.08750957                              | 1.273542723                       | 185.1007845                                     | 754.5657201                              |
| 0.093168543                   | 137.4295167                              | 1.268355514                       | 268.267118                                      | 1300.597979                              |
| 0.078799644                   | 77.08190993                              | 1.225312238                       | 387.0341317                                     | 841.994256                               |
| 0.060980801                   | 101.6922347                              | 1.176743232                       | 761.3706187                                     | 1601.73069                               |
| 0.071195533                   | 171.2136783                              | 1.205095316                       | 337.8249164                                     | 1857.717825                              |
| 0.06597737                    | 217.2264002                              | 1.183870192                       | 1703.661274                                     | 3638.803522                              |
| 0.067265899                   | 35.83423485                              | 1.198354929                       | 253.7567161                                     | 487.3277968                              |
| 0.059554451                   | 9.083679259                              | 1.173144818                       | 147.5202353                                     | 115.2715106                              |
| 0.050317487                   | 25.16370327                              | 1.146116373                       | 243.3621066                                     | 435.731335                               |
| 0.119451116                   | 303.7776601                              | 1.331596591                       | 266.8038756                                     | 2604.394008                              |
| 0.073562751                   | 60.00954292                              | 1.211446196                       | 273.72579                                       | 686.8654665                              |
| 0.070838411                   | 234.0627489                              | 1.203276995                       | 426.4019775                                     | 3192.984446                              |
| 0.063128162                   | 36.34984553                              | 1.184381669                       | 253.8954086                                     | 500.4482698                              |
| 0.181647433                   | 729.0414873                              | 1.476605512                       | 430.5541637                                     | 4585.935039                              |
| 0.059883835                   | 53.3957547                               | 1.173716208                       | 202.0006507                                     | 751.8167484                              |
| 0.100798444                   | 173.8481569                              | 1.282950719                       | 337.5274807                                     | 1726.861258                              |
| 0.076831687                   | 91.35164387                              | 1.221458186                       | 316.9190866                                     | 1064.896471                              |
| 0.126960107                   | 57.86009342                              | 1.33444072                        | 383.3325604                                     | 627.5111159                              |
| 0.110165849                   | 72.1940719                               | 1.306565599                       | 726.9871193                                     | 683.4044268                              |
| 0.075169681                   | 125.1696054                              | 1.214264193                       | 511.3575922                                     | 1757.352309                              |
| 0.064435195                   | 304.6642445                              | 1.183068595                       | 715.6519864                                     | 4664.976844                              |
| 0.123020548                   | 259.0804818                              | 1.327049397                       | 296.5635389                                     | 2389.276207                              |
| 0.285153648                   | 370.9799214                              | 1.738064108                       | 188.4443276                                     | 1639.546355                              |
| 0.064684809                   | 16.70729987                              | 1.196811903                       | 187.6791321                                     | 180.8531368                              |
| 0.077948386                   | 96.96249917                              | 1.219561839                       | 603.6683164                                     | 1285.513634                              |
| 0.046947616                   | 20.50261129                              | 1.138695209                       | 432.3573394                                     | 346.8606298                              |
| 0.108309912                   | 275.053873                               | 1.300280731                       | 300.0219163                                     | 2491.042795                              |
| 0.084550549                   | 37.56525794                              | 1.239807685                       | 98.68583375                                     | 362.7894553                              |
| 0.055796321                   | 106.3878283                              | 1.161885517                       | 724.7078268                                     | 1737.464276                              |
| 0.143783808                   | 302.8917756                              | 1.391492764                       | 203.3918106                                     | 2228.327618                              |
| 0.120563294                   | 109.1757333                              | 1.339499665                       | 154.2686192                                     | 851.5994489                              |
| 0.182777317                   | 534.971198                               | 1.473731715                       | 564.4698273                                     | 3647.320133                              |
| 0.176601522                   | 643.6998583                              | 1.462905654                       | 607.3462064                                     | 4756.776068                              |
| 0.097655104                   | 603.3510232                              | 1.268168926                       | 910.3175702                                     | 7351.433757                              |
| 0.062664149                   | 71.48269184                              | 1.184433562                       | 386.8191986                                     | 943.8327036                              |
| 0.066114665                   | 65.52723211                              | 1.191345655                       | 435.1083588                                     | 941.6672207                              |
| 0.064381513                   | 37.7986438                               | 1.191715795                       | 253.7462621                                     | 511.4019536                              |
| 0.083694908                   | 128.0170479                              | 1.240001403                       | 343.8095123                                     | 1430.077696                              |
| 0.075006651                   | 156.6934414                              | 1.209104436                       | 751.4828465                                     | 2381.731174                              |
| 0.064382013                   | 31.32231633                              | 1.18906784                        | 328.8976344                                     | 425.4086476                              |
| 0.047428442                   | 70.45268844                              | 1.137299064                       | 439.3392596                                     | 1182.881175                              |
| 0.047834658                   | 131.3352018                              | 1.138900812                       | 740.9175866                                     | 2459.201678                              |
| 0.064043685                   | 11.19164425                              | 1.194501616                       | 359.0593852                                     | 121.3069103                              |
| 0.083583804                   | 239.3753333                              | 1.233443838                       | 118.7244888                                     | 2779.622118                              |
| 0.083219564                   | 368.7329857                              | 1.238259749                       | 458.5871352                                     | 4448.670075                              |
| 0.06957355                    | 46.95215719                              | 1.199581441                       | 550.29321                                       | 652.865543                               |
| 0.044609451                   | 73.89880118                              | 1.130249181                       | 449.9405367                                     | 1377.144922                              |
| 0.103787209                   | 16.95408112                              | 1.284738231                       | 146.507875                                      | 145.3916569                              |
| 0.036794353                   | 5.210436261                              | 1.105640263                       | 299.427616                                      | 95.54876455                              |
| 0.135657629                   | 329.4737017                              | 1.357240964                       | 265.6657521                                     | 3011.860409                              |
| 0.058930952                   | 41.77085385                              | 1.172634027                       | 380.8274602                                     | 603.498865                               |
| 0.10510614                    | 49.0183929                               | 1.150217097                       | 566.8629887                                     | 891.281447                               |
| 0.139495406                   | 340.4072972                              | 1.369499294                       | 364.8388838                                     | 3063.961904                              |
| 0.150421348                   | 564.1073086                              | 1.40445036                        | 397.9684721                                     | 4230.604768                              |
| 0.024652871                   | 9.132883124                              | 1.072462116                       | 927.7516651                                     | 236.4840983                              |
| 0.089200592                   | 76.54297014                              | 1.244189283                       | 475.5775314                                     | 991.7871384                              |
| 0.04383695                    | 8.483700898                              | 1.130503149                       | 210.011392                                      | 109.1637177                              |
| 0.054203951                   | 20.48141692                              | 1.163644464                       | 857.8657738                                     | 326.3000874                              |
| 0.097643959                   | 57.42966699                              | 1.268309009                       | 742.1532284                                     | 646.1159614                              |

| wavelet.HHL_glrIm_ShortRunEmphasis | wavelet.HHL_glrIm_LongRunHighGrayLevelEmphasis | wavelet.HHL_glrIm_RunPercentage | wavelet.HHL_glrIm_LongRunLowGrayLevelEmphasis | wavelet.HHL_glrIm_RunEntropy |
|------------------------------------|------------------------------------------------|---------------------------------|-----------------------------------------------|------------------------------|
| 0.964475039                        | 694.7508895                                    | 0.951296579                     | 0.004267301                                   | 4.85055787                   |
| 0.92290199                         | 496.9471241                                    | 0.893596533                     | 0.00527037                                    | 4.321895545                  |
| 0.966704354                        | 386.7268861                                    | 0.956043956                     | 0.008484527                                   | 4.596860166                  |
| 0.95819501                         | 2318.903371                                    | 0.941672749                     | 0.00112535                                    | 4.919154577                  |
| 0.937871019                        | 105.9246864                                    | 0.919005785                     | 0.02780442                                    | 3.904420051                  |
| 0.951857832                        | 236.5756536                                    | 0.936356023                     | 0.010668911                                   | 4.241004637                  |
| 0.968287033                        | 409.4726275                                    | 0.958456973                     | 0.008714411                                   | 4.583643966                  |
| 0.965597283                        | 526.8467206                                    | 0.954398895                     | 0.00680278                                    | 4.82152508                   |
| 0.954403734                        | 810.4091184                                    | 0.939467939                     | 0.002669442                                   | 4.608032938                  |
| 0.955257034                        | 629.9233611                                    | 0.940259224                     | 0.003324636                                   | 4.611491287                  |
| 0.957844729                        | 429.1462714                                    | 0.944098223                     | 0.005807237                                   | 4.41153289                   |
| 0.955799727                        | 586.9710783                                    | 0.940880307                     | 0.003919713                                   | 4.651653849                  |
| 0.952809624                        | 2548.297913                                    | 0.937207922                     | 0.001147522                                   | 4.71820728                   |
| 0.935762074                        | 248.0000409                                    | 0.915714875                     | 0.009615205                                   | 4.095027296                  |
| 0.960293161                        | 471.2025162                                    | 0.946888457                     | 0.005093913                                   | 4.4546138                    |
| 0.900913226                        | 1230.490098                                    | 0.861810854                     | 0.002667742                                   | 4.340773158                  |
| 0.930341479                        | 186.3599551                                    | 0.907207406                     | 0.014010707                                   | 3.959727209                  |
| 0.934182381                        | 821.3278979                                    | 0.91044333                      | 0.00298024                                    | 4.523297926                  |
| 0.954292625                        | 443.2715582                                    | 0.939598202                     | 0.006912944                                   | 4.5252379                    |
| 0.926912066                        | 345.9878535                                    | 0.899870925                     | 0.007886353                                   | 4.250216393                  |
| 0.929458557                        | 600.7144053                                    | 0.901858287                     | 0.004105039                                   | 4.483035956                  |
| 0.960071023                        | 345.5181089                                    | 0.946601073                     | 0.007451361                                   | 4.599383899                  |
| 0.947785288                        | 496.4443391                                    | 0.928822916                     | 0.004554988                                   | 4.513784075                  |
| 0.971423712                        | 621.8341332                                    | 0.962418039                     | 0.00703188                                    | 5.008527526                  |
| 0.955123521                        | 1302.839802                                    | 0.938729875                     | 0.002235015                                   | 4.618128901                  |
| 0.958745104                        | 476.0486196                                    | 0.944469076                     | 0.005531644                                   | 4.469119081                  |
| 0.947742325                        | 899.6819312                                    | 0.929690621                     | 0.002265545                                   | 4.54837329                   |
| 0.948831648                        | 447.5658742                                    | 0.931289924                     | 0.005514184                                   | 4.562162257                  |
| 0.964836502                        | 862.8610148                                    | 0.951579865                     | 0.003351535                                   | 5.114211192                  |
| 0.907628969                        | 379.0839059                                    | 0.870604612                     | 0.008397939                                   | 4.19252957                   |
| 0.957150224                        | 336.586965                                     | 0.942991265                     | 0.006804757                                   | 4.473554883                  |
| 0.913058873                        | 629.1062061                                    | 0.881995071                     | 0.003914031                                   | 4.122153498                  |
| 0.955356636                        | 640.2054828                                    | 0.939952325                     | 0.004008131                                   | 4.657092376                  |
| 0.964435489                        | 271.4097824                                    | 0.952662722                     | 0.029634184                                   | 4.254730102                  |
| 0.974355208                        | 383.5346858                                    | 0.966404078                     | 0.010590944                                   | 4.774543082                  |
| 0.935653085                        | 365.0398578                                    | 0.914851485                     | 0.005981179                                   | 4.127279449                  |
| 0.949990028                        | 599.2229376                                    | 0.932051282                     | 0.003728564                                   | 4.617843382                  |
| 0.942040538                        | 409.2063085                                    | 0.921494427                     | 0.005413003                                   | 4.363938127                  |
| 0.948838509                        | 237.5033999                                    | 0.933210502                     | 0.011636809                                   | 4.356142716                  |
| 0.949339476                        | 276.1974937                                    | 0.932023172                     | 0.009512112                                   | 4.346253705                  |
| 0.951539199                        | 648.9770303                                    | 0.934766726                     | 0.003807018                                   | 4.672149088                  |
| 0.941737835                        | 247.5095579                                    | 0.922189039                     | 0.011227149                                   | 4.138887031                  |
| 0.941626387                        | 359.4465777                                    | 0.92279584                      | 0.006073528                                   | 4.174100341                  |
| 0.950797356                        | 492.6056104                                    | 0.934258912                     | 0.004610471                                   | 4.311737529                  |
| 0.960149595                        | 925.9506558                                    | 0.946915704                     | 0.003146557                                   | 4.80267614                   |
| 0.954562702                        | 424.4588951                                    | 0.939303964                     | 0.004946933                                   | 4.272688607                  |
| 0.960366794                        | 2089.791924                                    | 0.946103357                     | 0.000998793                                   | 4.95227015                   |
| 0.954884392                        | 313.6857598                                    | 0.940625412                     | 0.0119943                                     | 4.513565424                  |
| 0.961601718                        | 175.3284434                                    | 0.9489093                       | 0.033299682                                   | 4.261388829                  |
| 0.966827394                        | 280.2071253                                    | 0.955734406                     | 0.015477995                                   | 4.72519008                   |
| 0.931944017                        | 377.3416918                                    | 0.908586449                     | 0.006092951                                   | 4.196887888                  |
| 0.953348044                        | 345.2670594                                    | 0.93795926                      | 0.007202011                                   | 4.321765508                  |
| 0.955103567                        | 531.1816443                                    | 0.939947255                     | 0.00420882                                    | 4.602741504                  |
| 0.9582258                          | 311.3067579                                    | 0.944683067                     | 0.01152374                                    | 4.520955008                  |
| 0.912691944                        | 692.0141927                                    | 0.880128303                     | 0.003723479                                   | 4.130132401                  |
| 0.960870366                        | 241.2657698                                    | 0.947755316                     | 0.013204409                                   | 4.545071809                  |
| 0.940338651                        | 456.1904606                                    | 0.920130485                     | 0.004730776                                   | 4.270701607                  |
| 0.951346534                        | 276.2571483                                    | 0.935153787                     | 0.010626507                                   | 4.375042352                  |
| 0.935713624                        | 536.2785389                                    | 0.910602911                     | 0.007742662                                   | 4.549672953                  |
| 0.936623794                        | 1007.923257                                    | 0.914782153                     | 0.003086148                                   | 4.308528363                  |
| 0.953183595                        | 645.6989983                                    | 0.937307148                     | 0.00370484                                    | 4.716213416                  |
| 0.959755914                        | 874.9081125                                    | 0.945881428                     | 0.002263722                                   | 4.758900979                  |
| 0.93612774                         | 416.5238666                                    | 0.912198158                     | 0.005845253                                   | 4.336225142                  |
| 0.87466444                         | 369.9746274                                    | 0.830465031                     | 0.010076211                                   | 3.841450854                  |
| 0.953838893                        | 232.9011329                                    | 0.94044665                      | 0.01500438                                    | 4.20337171                   |
| 0.952776169                        | 764.9580137                                    | 0.936301947                     | 0.003943712                                   | 4.704065265                  |
| 0.967832148                        | 507.349185                                     | 0.957438501                     | 0.006199566                                   | 4.62802838                   |
| 0.937972429                        | 411.1101816                                    | 0.916171411                     | 0.005472186                                   | 4.229353651                  |
| 0.948448852                        | 125.4880485                                    | 0.93065747                      | 0.025927198                                   | 4.06204784                   |
| 0.963352124                        | 866.4912603                                    | 0.95107677                      | 0.002442712                                   | 4.741860636                  |
| 0.923056402                        | 302.8738381                                    | 0.895597166                     | 0.007967673                                   | 4.040908621                  |
| 0.929632488                        | 220.1918322                                    | 0.906111603                     | 0.011136739                                   | 3.996443266                  |
| 0.913708289                        | 899.9792857                                    | 0.881370564                     | 0.002839444                                   | 4.125681076                  |
| 0.91467768                         | 965.2734513                                    | 0.882874422                     | 0.002579723                                   | 4.302346981                  |
| 0.944707107                        | 1211.190044                                    | 0.924752807                     | 0.01684718                                    | 4.676968732                  |
| 0.957891782                        | 473.1074243                                    | 0.944444444                     | 0.004861097                                   | 4.479708087                  |
| 0.957163555                        | 540.3784169                                    | 0.943047999                     | 0.006924679                                   | 4.632480586                  |
| 0.955615696                        | 310.8377619                                    | 0.942118537                     | 0.008988881                                   | 4.499585518                  |
| 0.947525922                        | 444.4613055                                    | 0.930184894                     | 0.005870768                                   | 4.410359321                  |
| 0.955477332                        | 942.6895042                                    | 0.939510244                     | 0.002336732                                   | 4.754249132                  |
| 0.95720394                         | 353.3560115                                    | 0.943528694                     | 0.011093757                                   | 4.560436337                  |
| 0.968623298                        | 510.5677657                                    | 0.958010669                     | 0.005124657                                   | 4.708880322                  |
| 0.968183092                        | 863.3799455                                    | 0.957571082                     | 0.002687776                                   | 4.925522109                  |
| 0.954448297                        | 449.3994791                                    | 0.941644562                     | 0.021279849                                   | 4.228300059                  |
| 0.950403147                        | 538.3450042                                    | 0.932921988                     | 0.004051597                                   | 4.460565357                  |
| 0.948018448                        | 595.9286189                                    | 0.93077485                      | 0.003396232                                   | 4.49308603                   |
| 0.956022961                        | 684.1610308                                    | 0.941170655                     | 0.003966587                                   | 4.588788789                  |
| 0.969997265                        | 519.0129466                                    | 0.960001983                     | 0.004489766                                   | 4.823810368                  |
| 0.942030315                        | 194.0784337                                    | 0.921815889                     | 0.023500395                                   | 4.024982567                  |
| 0.976162841                        | 338.098686                                     | 0.967765568                     | 0.031470214                                   | 4.659708213                  |
| 0.93147063                         | 383.3511584                                    | 0.905292695                     | 0.006555606                                   | 4.300513832                  |
| 0.960630097                        | 460.8676197                                    | 0.947809998                     | 0.005686169                                   | 4.546883948                  |
| 0.965355068                        | 667.6294185                                    | 0.954388078                     | 0.003893738                                   | 4.884475234                  |
| 0.928700786                        | 531.9111478                                    | 0.901993605                     | 0.004592483                                   | 4.360303835                  |
| 0.921658202                        | 602.1246107                                    | 0.893395654                     | 0.003783708                                   | 4.116197268                  |
| 0.982928589                        | 1009.479005                                    | 0.977196716                     | 0.006075528                                   | 5.10405336                   |
| 0.949418826                        | 615.5170501                                    | 0.930731275                     | 0.004284628                                   | 4.605282464                  |
| 0.969567057                        | 238.7124206                                    | 0.959974984                     | 0.01885696                                    | 4.295643822                  |
| 0.961730607                        | 1019.977331                                    | 0.950274                        | 0.005142853                                   | 4.801890165                  |
| 0.944739636                        | 985.5197543                                    | 0.92460204                      | 0.003205837                                   | 4.506059836                  |

| wavelet.HHL_glrml_HighGrayLevelRunEmphasis | wavelet.HHL_glrml_RunLengthNonUniformityNormalized | wavelet.HHL_glszm_GrayLevelVariance | wavelet.HHL_glszm_SmallAreaHighGrayLevelEmphasis |
|--------------------------------------------|----------------------------------------------------|-------------------------------------|--------------------------------------------------|
| 600.9552458                                | 0.911479764                                        | 57.18876726                         | 463.2917014                                      |
| 354.9896242                                | 0.818163857                                        | 27.06135238                         | 246.711634                                       |
| 342.7084079                                | 0.91585398                                         | 38.34976989                         | 279.8441779                                      |
| 1928.35057                                 | 0.896456598                                        | 64.42939298                         | 1466.460468                                      |
| 84.98548326                                | 0.849975719                                        | 12.66175895                         | 56.96840047                                      |
| 196.84556                                  | 0.881238506                                        | 23.84402367                         | 153.1004934                                      |
| 365.3399111                                | 0.920447608                                        | 40.65972241                         | 296.899084                                       |
| 461.7056319                                | 0.913202865                                        | 52.66387521                         | 341.4540632                                      |
| 676.2061971                                | 0.887058524                                        | 41.21255895                         | 489.3047093                                      |
| 527.664199                                 | 0.889081769                                        | 39.27357967                         | 394.8784332                                      |
| 364.2368569                                | 0.895271368                                        | 28.20009054                         | 262.493587                                       |
| 491.6830205                                | 0.890268592                                        | 41.95648861                         | 363.8215814                                      |
| 2103.457221                                | 0.883652572                                        | 56.85915269                         | 1519.086442                                      |
| 192.4585418                                | 0.845278243                                        | 18.95922627                         | 136.9213375                                      |
| 399.8324214                                | 0.901439712                                        | 29.61650936                         | 292.8964156                                      |
| 781.3290095                                | 0.774083574                                        | 59.6083577                          | 606.3185156                                      |
| 141.6851162                                | 0.833436799                                        | 16.85922949                         | 109.6057815                                      |
| 623.1198454                                | 0.842383157                                        | 38.97698755                         | 464.9764674                                      |
| 370.3973308                                | 0.886876959                                        | 40.07641053                         | 277.0774446                                      |
| 253.0998841                                | 0.82730762                                         | 25.94559112                         | 196.0200601                                      |
| 441.6371172                                | 0.832642873                                        | 34.19694465                         | 335.7638942                                      |
| 294.8525595                                | 0.900448696                                        | 35.58059673                         | 223.85112                                        |
| 399.2468886                                | 0.872751318                                        | 34.68561764                         | 295.9436405                                      |
| 559.0110899                                | 0.927380874                                        | 72.93849062                         | 457.5024577                                      |
| 1078.346366                                | 0.889292473                                        | 46.25652284                         | 833.4264399                                      |
| 403.9857368                                | 0.897441594                                        | 34.62484663                         | 315.5571198                                      |
| 726.6076639                                | 0.872234951                                        | 38.03189672                         | 530.7694217                                      |
| 366.2440229                                | 0.875315891                                        | 32.53895207                         | 282.7273926                                      |
| 738.8238144                                | 0.914229294                                        | 67.30666805                         | 567.1548615                                      |
| 251.5194842                                | 0.786931525                                        | 24.2472371                          | 182.994002                                       |
| 283.7092563                                | 0.893713002                                        | 29.06359465                         | 200.1274022                                      |
| 433.7481109                                | 0.797964962                                        | 22.33416076                         | 307.3765269                                      |
| 535.0368671                                | 0.889579221                                        | 42.11973131                         | 408.5167467                                      |
| 232.4550448                                | 0.910884357                                        | 30.52561983                         | 148.8075316                                      |
| 347.5627352                                | 0.934616181                                        | 49.99159947                         | 270.9055013                                      |
| 283.1494154                                | 0.844706185                                        | 20.68972396                         | 204.7329987                                      |
| 489.5687053                                | 0.878020784                                        | 37.74228436                         | 380.2159964                                      |
| 321.9866074                                | 0.859208973                                        | 26.97591393                         | 231.7489546                                      |
| 194.678573                                 | 0.874273874                                        | 26.08871106                         | 136.8778318                                      |
| 225.4730468                                | 0.875802888                                        | 27.71587666                         | 164.186247                                       |
| 536.4196872                                | 0.880779743                                        | 43.7600399                          | 423.7802202                                      |
| 196.0617761                                | 0.858296634                                        | 21.2037452                          | 148.8060927                                      |
| 284.5632327                                | 0.857983176                                        | 22.06892538                         | 199.6288802                                      |
| 406.009287                                 | 0.878896904                                        | 28.58814091                         | 307.8874183                                      |
| 791.6579504                                | 0.900456755                                        | 52.05689919                         | 608.6520579                                      |
| 353.547118                                 | 0.887452843                                        | 24.57562391                         | 250.2890784                                      |
| 1772.22117                                 | 0.901266141                                        | 73.29589261                         | 1370.183541                                      |
| 264.8920676                                | 0.888234705                                        | 32.38355041                         | 202.7659697                                      |
| 152.516881                                 | 0.905160232                                        | 26.11678201                         | 127.3013831                                      |
| 250.2940702                                | 0.916775526                                        | 45.04721652                         | 221.4039475                                      |
| 285.644547                                 | 0.836866648                                        | 23.10508735                         | 199.1802209                                      |
| 286.6763889                                | 0.884942994                                        | 27.24131429                         | 209.8251291                                      |
| 445.4007595                                | 0.888758142                                        | 37.42430669                         | 336.9596101                                      |
| 264.5261794                                | 0.895999724                                        | 35.52095793                         | 199.9631386                                      |
| 471.0496177                                | 0.797511606                                        | 27.33079468                         | 351.8863495                                      |
| 209.2257062                                | 0.902208134                                        | 35.65198636                         | 174.7794717                                      |
| 358.2142162                                | 0.855384494                                        | 26.6395938                          | 271.5573923                                      |
| 227.6524871                                | 0.880223917                                        | 28.49853521                         | 171.4574127                                      |
| 408.1586982                                | 0.846037187                                        | 44.7145821                          | 315.8803688                                      |
| 775.0269478                                | 0.847405761                                        | 40.34083311                         | 580.9546339                                      |
| 535.5453874                                | 0.884424218                                        | 47.25285355                         | 394.8152625                                      |
| 744.4086576                                | 0.899864451                                        | 47.2976987                          | 554.5968455                                      |
| 316.1147737                                | 0.846845378                                        | 29.23251878                         | 242.0192502                                      |
| 214.8109164                                | 0.722240629                                        | 17.95124962                         | 160.9851818                                      |
| 196.2545082                                | 0.885578137                                        | 26.07545967                         | 148.768898                                       |
| 632.3353905                                | 0.883655883                                        | 53.28399006                         | 504.3112501                                      |
| 446.5288156                                | 0.919016766                                        | 39.39612211                         | 331.8541784                                      |
| 319.0729769                                | 0.850217639                                        | 25.15482623                         | 232.1054128                                      |
| 103.3928964                                | 0.873698795                                        | 19.64947743                         | 84.7658069                                       |
| 750.9286326                                | 0.908136735                                        | 44.15582252                         | 571.8940183                                      |
| 219.7609324                                | 0.818107309                                        | 18.76779208                         | 166.5551284                                      |
| 165.5738279                                | 0.832050266                                        | 17.02750665                         | 117.6524214                                      |
| 616.2618662                                | 0.799584026                                        | 24.76184328                         | 448.8710539                                      |
| 663.1455079                                | 0.801263683                                        | 31.85729326                         | 480.1815762                                      |
| 961.7932694                                | 0.865484396                                        | 47.31162267                         | 727.8223714                                      |
| 402.8391043                                | 0.895139005                                        | 32.18412313                         | 312.654347                                       |
| 454.3800184                                | 0.893561014                                        | 40.18330426                         | 322.2232614                                      |
| 264.5340685                                | 0.889542463                                        | 32.16815024                         | 208.9877915                                      |
| 361.9458615                                | 0.871283933                                        | 33.03586446                         | 280.2981349                                      |
| 785.1261961                                | 0.890195534                                        | 45.30973598                         | 589.6424385                                      |
| 300.8933915                                | 0.893907325                                        | 38.620096                           | 238.1937441                                      |
| 452.5986682                                | 0.920599405                                        | 43.40611863                         | 365.8996144                                      |
| 763.8002674                                | 0.91958358                                         | 55.30595383                         | 598.3788336                                      |
| 376.2599504                                | 0.887320503                                        | 32.56152344                         | 236.893781                                       |
| 439.7303733                                | 0.878249864                                        | 32.88173896                         | 334.4431486                                      |
| 483.1724309                                | 0.87247493                                         | 31.89616364                         | 346.8369029                                      |
| 574.550174                                 | 0.891125353                                        | 43.57205606                         | 437.9609853                                      |
| 462.8791645                                | 0.924020423                                        | 47.56422572                         | 361.1759954                                      |
| 154.4987734                                | 0.860334467                                        | 25.13493333                         | 142.1293953                                      |
| 306.4949326                                | 0.939698349                                        | 60.45987654                         | 249.4296875                                      |
| 284.5963201                                | 0.836507134                                        | 26.26738586                         | 208.726833                                       |
| 395.8239139                                | 0.901602667                                        | 34.45576414                         | 279.6250462                                      |
| 585.7253326                                | 0.913103526                                        | 54.51001356                         | 470.5689313                                      |
| 391.9642246                                | 0.830231582                                        | 31.95691525                         | 294.7154854                                      |
| 431.1409586                                | 0.815259854                                        | 22.15257403                         | 305.2362331                                      |
| 943.2399626                                | 0.95618275                                         | 84.41635161                         | 770.9829116                                      |
| 499.6729645                                | 0.876055862                                        | 40.56346282                         | 369.1371248                                      |
| 215.5508883                                | 0.9236466                                          | 31.20489796                         | 173.0372393                                      |
| 888.6696326                                | 0.904976745                                        | 93.24056465                         | 716.0348575                                      |
| 783.846958                                 | 0.865554035                                        | 44.25031142                         | 621.1760804                                      |

| wavelet.HHL_glszm_GrayLevelNonUniformityNormalized | wavelet.HHL_glszm_SizeZoneNonUniformityNormalized | wavelet.HHL_glszm_SizeZoneNonUniformity | wavelet.HHL_glszm_GrayLevelNonUniformity |
|----------------------------------------------------|---------------------------------------------------|-----------------------------------------|------------------------------------------|
| 0.039481345                                        | 0.493046022                                       | 183.9061662                             | 14.72654155                              |
| 0.056034202                                        | 0.406144004                                       | 270.898051                              | 37.37481259                              |
| 0.047556432                                        | 0.531996494                                       | 124.4871795                             | 11.12820513                              |
| 0.038293426                                        | 0.526438773                                       | 726.4855072                             | 52.84492754                              |
| 0.080742423                                        | 0.336831389                                       | 38.0619469                              | 9.123893805                              |
| 0.059733728                                        | 0.464881657                                       | 120.8692308                             | 15.53076923                              |
| 0.04872614                                         | 0.489704422                                       | 94.51295337                             | 9.404145078                              |
| 0.041219543                                        | 0.465738052                                       | 248.7041199                             | 22.01123596                              |
| 0.046593437                                        | 0.440042815                                       | 404.3993471                             | 42.81936888                              |
| 0.047176394                                        | 0.471125691                                       | 679.8343728                             | 68.07553708                              |
| 0.053488569                                        | 0.411144749                                       | 154.5904255                             | 20.11170213                              |
| 0.044291169                                        | 0.46017191                                        | 307.8550075                             | 29.63079223                              |
| 0.043711712                                        | 0.463726521                                       | 430.8019376                             | 40.60818084                              |
| 0.067198486                                        | 0.415275149                                       | 142.8546512                             | 23.11627907                              |
| 0.053219753                                        | 0.474983279                                       | 220.3922414                             | 24.69396552                              |
| 0.050152855                                        | 0.485808634                                       | 928.8661088                             | 95.89225941                              |
| 0.077100284                                        | 0.429908832                                       | 86.84158416                             | 15.57425743                              |
| 0.048202995                                        | 0.452314724                                       | 365.470297                              | 38.9480198                               |
| 0.047846972                                        | 0.424941031                                       | 102.4107884                             | 11.53112033                              |
| 0.056988557                                        | 0.436667229                                       | 403.4805195                             | 52.66666667                              |
| 0.050500119                                        | 0.494394796                                       | 948.2492179                             | 96.85922836                              |
| 0.047623828                                        | 0.458402047                                       | 377.2648846                             | 39.19441069                              |
| 0.04939693                                         | 0.471533477                                       | 554.9949023                             | 58.14018692                              |
| 0.036655071                                        | 0.558438944                                       | 166.9732441                             | 10.95986622                              |
| 0.046190946                                        | 0.524378002                                       | 310.9561551                             | 27.39123103                              |
| 0.051713786                                        | 0.523899026                                       | 177.6017699                             | 17.53097345                              |
| 0.047836147                                        | 0.451722595                                       | 640.9943622                             | 67.8794926                               |
| 0.050028764                                        | 0.470100879                                       | 293.3429487                             | 31.21794872                              |
| 0.035114536                                        | 0.499775084                                       | 489.7795918                             | 34.4122449                               |
| 0.061433532                                        | 0.43977931                                        | 318.84                                  | 44.53931034                              |
| 0.051883413                                        | 0.422553995                                       | 620.3092643                             | 76.16485014                              |
| 0.064110209                                        | 0.434565444                                       | 728.7662493                             | 107.5128205                              |
| 0.044901398                                        | 0.482321406                                       | 434.5715871                             | 40.45615982                              |
| 0.05785124                                         | 0.486942149                                       | 26.78181818                             | 3.181818182                              |
| 0.041890344                                        | 0.537341929                                       | 113.3791469                             | 8.838862559                              |
| 0.066597223                                        | 0.411734358                                       | 262.6865204                             | 42.48902821                              |
| 0.047550448                                        | 0.469150918                                       | 592.5376089                             | 60.05621536                              |
| 0.055206823                                        | 0.451558877                                       | 590.1874522                             | 72.15531752                              |
| 0.055538456                                        | 0.407971684                                       | 139.5263158                             | 18.99415205                              |
| 0.055144568                                        | 0.427443743                                       | 185.0831409                             | 23.87759815                              |
| 0.044196244                                        | 0.487452482                                       | 317.8190184                             | 28.81595092                              |
| 0.06239019                                         | 0.466097745                                       | 155.6766467                             | 20.83823335                              |
| 0.061779337                                        | 0.420982143                                       | 235.75                                  | 34.59642857                              |
| 0.054785409                                        | 0.444082709                                       | 183.8502415                             | 22.68115942                              |
| 0.041613547                                        | 0.488209553                                       | 454.5230934                             | 38.74221267                              |
| 0.059311423                                        | 0.447012088                                       | 438.5188583                             | 58.18450561                              |
| 0.037019286                                        | 0.522031842                                       | 1139.595511                             | 80.81310124                              |
| 0.051213223                                        | 0.483927273                                       | 133.08                                  | 14.08363636                              |
| 0.055795848                                        | 0.442041522                                       | 30.05882353                             | 3.794117647                              |
| 0.04241302                                         | 0.515490614                                       | 140.7289377                             | 11.57875458                              |
| 0.060715092                                        | 0.41102057                                        | 443.4911956                             | 65.5115848                               |
| 0.05637551                                         | 0.453289796                                       | 158.6514286                             | 19.73142857                              |
| 0.046309305                                        | 0.461772277                                       | 802.0984456                             | 80.4392631                               |
| 0.051105645                                        | 0.477106719                                       | 135.0212014                             | 14.46289753                              |
| 0.058292339                                        | 0.482078702                                       | 871.1162147                             | 105.3342557                              |
| 0.04818618                                         | 0.505965407                                       | 220.6009174                             | 21.00917431                              |
| 0.055884296                                        | 0.478001173                                       | 350.852861                              | 41.01907357                              |
| 0.053399943                                        | 0.449916109                                       | 231.7067961                             | 27.50097087                              |
| 0.047653856                                        | 0.499295888                                       | 152.2852459                             | 14.53442623                              |
| 0.054168234                                        | 0.47362537                                        | 144.4557377                             | 16.52131148                              |
| 0.042659174                                        | 0.459907718                                       | 437.3722397                             | 40.56887487                              |
| 0.043876854                                        | 0.474113642                                       | 1284.84797                              | 118.9062731                              |
| 0.053249332                                        | 0.471248521                                       | 573.5094495                             | 64.80443714                              |
| 0.079311783                                        | 0.472224766                                       | 256.4180479                             | 43.06629834                              |
| 0.05834839                                         | 0.442448719                                       | 42.91752577                             | 5.659793814                              |
| 0.042557911                                        | 0.515637941                                       | 361.4621969                             | 29.83309558                              |
| 0.045760734                                        | 0.49783993                                        | 110.0226244                             | 10.11312217                              |
| 0.058898471                                        | 0.432656789                                       | 472.8938701                             | 64.37602928                              |
| 0.069531137                                        | 0.427420525                                       | 70.95180723                             | 11.54216867                              |
| 0.043386379                                        | 0.482539606                                       | 511.0094429                             | 45.94617564                              |
| 0.069311055                                        | 0.477133903                                       | 442.3031284                             | 64.25134844                              |
| 0.07241233                                         | 0.442479071                                       | 142.4782609                             | 23.31677019                              |
| 0.063646567                                        | 0.442803678                                       | 634.9804742                             | 91.26917713                              |
| 0.054305352                                        | 0.459365577                                       | 929.7559289                             | 109.9140316                              |
| 0.044161308                                        | 0.478351678                                       | 1859.352971                             | 171.6550039                              |
| 0.052265464                                        | 0.475674934                                       | 240.2158416                             | 26.39405941                              |
| 0.046779826                                        | 0.458515251                                       | 235.2183236                             | 23.99805068                              |
| 0.050841273                                        | 0.467320048                                       | 129.4476534                             | 14.08303249                              |
| 0.051979759                                        | 0.481445313                                       | 338.9375                                | 36.59375                                 |
| 0.043135272                                        | 0.481406083                                       | 668.1916427                             | 59.87175793                              |
| 0.050656                                           | 0.514336                                          | 128.584                                 | 12.664                                   |
| 0.043433091                                        | 0.52837461                                        | 409.4903226                             | 33.66064516                              |
| 0.039531355                                        | 0.525919521                                       | 855.1451415                             | 64.27798278                              |
| 0.057617188                                        | 0.373535156                                       | 23.90625                                | 3.6875                                   |
| 0.05126355                                         | 0.471383372                                       | 683.0345066                             | 74.28088337                              |
| 0.050423179                                        | 0.443069889                                       | 968.5507777                             | 110.2250686                              |
| 0.045557918                                        | 0.485964811                                       | 169.6017192                             | 15.89971347                              |
| 0.04119852                                         | 0.491306367                                       | 442.6670366                             | 37.11986681                              |
| 0.070222222                                        | 0.499733333                                       | 37.48                                   | 5.266666667                              |
| 0.045524691                                        | 0.562114198                                       | 40.47222222                             | 3.277777778                              |
| 0.05754279                                         | 0.437349353                                       | 593.0457227                             | 78.0280236                               |
| 0.050216296                                        | 0.459065083                                       | 161.5909091                             | 17.67613636                              |
| 0.038639085                                        | 0.525651021                                       | 306.4545455                             | 22.52658662                              |
| 0.053733393                                        | 0.470171869                                       | 642.7249451                             | 73.45354792                              |
| 0.065213117                                        | 0.438394426                                       | 705.3766314                             | 104.9279055                              |
| 0.033494802                                        | 0.606687146                                       | 111.6304348                             | 6.163043478                              |
| 0.046765842                                        | 0.454961925                                       | 240.6748582                             | 24.73913043                              |
| 0.059183673                                        | 0.435510204                                       | 30.48571429                             | 4.142857143                              |
| 0.041123419                                        | 0.483482012                                       | 97.66336634                             | 8.306930693                              |
| 0.048183391                                        | 0.533373702                                       | 181.3470588                             | 16.38235294                              |

| wavelet.HHL_glszm_LargeAreaEmphasis | wavelet.HHL_glszm_ZoneVariance | wavelet.HHL_glszm_ZonePercentage | wavelet.HHL_glszm_LargeAreaLowGrayLevelEmphasis | wavelet.HHL_glszm_LargeAreaHighGrayLevelEmphasis |
|-------------------------------------|--------------------------------|----------------------------------|-------------------------------------------------|--------------------------------------------------|
| 12.1233244                          | 8.540778702                    | 0.528328612                      | 0.026719537                                     | 6748.828418                                      |
| 266.0164918                         | 256.3198506                    | 0.321136254                      | 0.78274246                                      | 91340.87556                                      |
| 7.05982906                          | 3.619913799                    | 0.539170507                      | 0.033516466                                     | 2249.764957                                      |
| 33.69057971                         | 30.04469387                    | 0.523719165                      | 0.01875288                                      | 63781.41957                                      |
| 33.24778761                         | 23.15451484                    | 0.314763231                      | 0.556091425                                     | 2425.707965                                      |
| 34.61153846                         | 28.49542899                    | 0.404354588                      | 0.211311798                                     | 6199.211538                                      |
| 6.730569948                         | 3.681655883                    | 0.572700297                      | 0.031473531                                     | 2177.601036                                      |
| 8.464419476                         | 4.943525649                    | 0.532934132                      | 0.028500677                                     | 3658.52809                                       |
| 19.82698585                         | 14.70924895                    | 0.442039442                      | 0.032372985                                     | 13168.57889                                      |
| 27.55509356                         | 22.94584461                    | 0.465784377                      | 0.057521316                                     | 13919.28829                                      |
| 15.80585106                         | 10.96819121                    | 0.454655381                      | 0.054763452                                     | 5452.558511                                      |
| 22.65769806                         | 17.7503804                     | 0.451417004                      | 0.052753819                                     | 10612.19581                                      |
| 24.07965554                         | 19.09556325                    | 0.447926712                      | 0.012996824                                     | 49400.06889                                      |
| 132.3662791                         | 121.8037791                    | 0.307692308                      | 0.777016053                                     | 23465.78198                                      |
| 14.90732759                         | 11.05253697                    | 0.509330406                      | 0.041804611                                     | 6057.094828                                      |
| 2475.476464                         | 2462.27511                     | 0.275226717                      | 3.280597993                                     | 1872147.945                                      |
| 133.2376238                         | 121.2975199                    | 0.289398281                      | 1.047892562                                     | 17669.58416                                      |
| 134.7252475                         | 126.3954514                    | 0.346483705                      | 0.234066786                                     | 78793.65718                                      |
| 26.04149378                         | 20.20956939                    | 0.414089347                      | 0.083998283                                     | 9310.008299                                      |
| 215.7391775                         | 206.5498808                    | 0.329882185                      | 0.92298809                                      | 51225.20346                                      |
| 621.4400417                         | 614.0216608                    | 0.367151608                      | 1.499912746                                     | 258774.2372                                      |
| 13.13001215                         | 8.762267672                    | 0.478488372                      | 0.056439544                                     | 3820.27582                                       |
| 67.23109601                         | 61.84727671                    | 0.430977664                      | 0.181841231                                     | 25565.42226                                      |
| 5.341137124                         | 2.753235422                    | 0.621621622                      | 0.019184564                                     | 2766.558528                                      |
| 34.39797639                         | 30.27563849                    | 0.492524917                      | 0.034912004                                     | 36225.66779                                      |
| 14.59587021                         | 10.40485203                    | 0.488472622                      | 0.045038403                                     | 5532.958702                                      |
| 60.90768147                         | 54.94155677                    | 0.409405655                      | 0.089999289                                     | 42146.43411                                      |
| 28.02083333                         | 22.74703885                    | 0.435450105                      | 0.091210077                                     | 9394.605769                                      |
| 7.401020408                         | 4.157345898                    | 0.555240793                      | 0.01551163                                      | 5229.623469                                      |
| 709.2468966                         | 696.9534098                    | 0.285208497                      | 2.97433393                                      | 170430.0331                                      |
| 14.53337875                         | 9.843852783                    | 0.461780434                      | 0.060390474                                     | 4087.478883                                      |
| 1054.572451                         | 1042.068615                    | 0.282799325                      | 2.544257567                                     | 438627.3936                                      |
| 34.25194229                         | 29.16068347                    | 0.443187408                      | 0.071929734                                     | 17522.65927                                      |
| 8.545454545                         | 4.969917355                    | 0.528846154                      | 0.08522383                                      | 1946.890909                                      |
| 3.933649289                         | 1.457873812                    | 0.635542169                      | 0.024594075                                     | 1296.943128                                      |
| 169.846395                          | 159.8219259                    | 0.315841584                      | 0.64511647                                      | 45442.89498                                      |
| 46.15043547                         | 40.95073563                    | 0.438541667                      | 0.107454553                                     | 20585.97229                                      |
| 187.4843152                         | 180.8990247                    | 0.389683959                      | 0.624697692                                     | 56948.60138                                      |
| 24.78070175                         | 18.81967956                    | 0.409580838                      | 0.152863283                                     | 4657.093567                                      |
| 44.94457275                         | 39.07542309                    | 0.412774071                      | 0.234256699                                     | 9195.290993                                      |
| 23.02453988                         | 17.91361173                    | 0.442333786                      | 0.050669053                                     | 11426.52761                                      |
| 66.88922156                         | 58.74793826                    | 0.350472193                      | 0.385326755                                     | 12423.08683                                      |
| 109.9392857                         | 101.341824                     | 0.341047503                      | 0.399476798                                     | 30997.1125                                       |
| 47.68357488                         | 41.55376438                    | 0.403902439                      | 0.125916422                                     | 18877.29227                                      |
| 15.92696026                         | 11.85792162                    | 0.495740149                      | 0.027036115                                     | 11899.88292                                      |
| 22.17533129                         | 17.01720041                    | 0.440350206                      | 0.069781334                                     | 7559.29052                                       |
| 23.16811727                         | 19.34925293                    | 0.511720581                      | 0.014249966                                     | 39586.7989                                       |
| 17.56                               | 13.0656                        | 0.471698113                      | 0.094804453                                     | 4142.378182                                      |
| 7.705882353                         | 3.82266436                     | 0.507462687                      | 0.143874496                                     | 987.2941176                                      |
| 9.344322344                         | 6.030055415                    | 0.549295775                      | 0.081898019                                     | 1697.783883                                      |
| 187.6663577                         | 177.5964701                    | 0.315128505                      | 0.706939363                                     | 50606.21965                                      |
| 20.48857143                         | 14.90547755                    | 0.423216445                      | 0.083135364                                     | 5735.102857                                      |
| 23.64939551                         | 18.8104087                     | 0.454593038                      | 0.060421823                                     | 10010.65918                                      |
| 16.69611307                         | 12.33495237                    | 0.478849408                      | 0.085230344                                     | 4157.286219                                      |
| 1692.675706                         | 1679.644684                    | 0.277019776                      | 3.684391727                                     | 780046.342                                       |
| 13.2912844                          | 9.226806456                    | 0.496018203                      | 0.09571306                                      | 2431.188073                                      |
| 181.8896458                         | 172.9630649                    | 0.334701322                      | 0.546170618                                     | 61711.05041                                      |
| 25.16699029                         | 18.86347818                    | 0.398298531                      | 0.139366981                                     | 5414.320388                                      |
| 100.2491803                         | 93.12640688                    | 0.374692875                      | 0.28951395                                      | 37232.25902                                      |
| 84.29180328                         | 75.94822897                    | 0.346197503                      | 0.115805694                                     | 63709.52787                                      |
| 36.87592008                         | 31.91113013                    | 0.448796602                      | 0.078524662                                     | 18273.28181                                      |
| 18.89889299                         | 14.81282608                    | 0.494706097                      | 0.028709866                                     | 13328.43321                                      |
| 158.5291701                         | 152.0824947                    | 0.393851133                      | 0.516696882                                     | 49302.19474                                      |
| 2095.998158                         | 2070.702631                    | 0.198828268                      | 9.998068509                                     | 442120.6685                                      |
| 12.34020619                         | 7.335529812                    | 0.447004608                      | 0.090043779                                     | 2280.865979                                      |
| 45.77603424                         | 40.868008                      | 0.451384417                      | 0.081450397                                     | 27843.31954                                      |
| 7.529411765                         | 4.351016564                    | 0.560913706                      | 0.024511532                                     | 3296.904977                                      |
| 123.6386093                         | 115.0831181                    | 0.341883015                      | 0.408768723                                     | 38106.62214                                      |
| 43.84337349                         | 36.62476412                    | 0.372197309                      | 0.534141354                                     | 4153.5                                           |
| 8.52407932                          | 4.918025361                    | 0.52660368                       | 0.013929228                                     | 6100.400378                                      |
| 504.6364617                         | 493.8820242                    | 0.304934211                      | 2.446095144                                     | 105014.8921                                      |
| 217.8354037                         | 205.5418869                    | 0.285208149                      | 1.375370706                                     | 35484.47826                                      |
| 1245.909344                         | 1232.921212                    | 0.27747678                       | 2.089633531                                     | 744779.9596                                      |
| 1387.556324                         | 1376.545994                    | 0.301369863                      | 2.149651782                                     | 897709.3147                                      |
| 261.219964                          | 255.6422495                    | 0.423420479                      | 0.282589437                                     | 242636.6416                                      |
| 18.47128713                         | 13.58762474                    | 0.452508961                      | 0.053183512                                     | 7313.566337                                      |
| 21.61598441                         | 16.87496628                    | 0.459265891                      | 0.063174138                                     | 9542.904483                                      |
| 17.89891697                         | 13.04938159                    | 0.454098361                      | 0.090525486                                     | 4246.758123                                      |
| 39.86079545                         | 33.58235408                    | 0.399092971                      | 0.124730248                                     | 13620.07102                                      |
| 42.23342939                         | 38.02915687                    | 0.487702038                      | 0.05762914                                      | 32049.85807                                      |
| 19.976                              | 15.911744                      | 0.496031746                      | 0.095529507                                     | 5395.692                                         |
| 7.972903226                         | 4.978886993                    | 0.57792692                       | 0.024214431                                     | 3329.237419                                      |
| 10.37146371                         | 7.42304102                     | 0.582378223                      | 0.018117638                                     | 7008.178352                                      |
| 12.265625                           | 7.132568359                    | 0.44137931                       | 0.10498196                                      | 4636.703125                                      |
| 50.47826087                         | 45.00156268                    | 0.427307579                      | 0.127832345                                     | 20614.68392                                      |
| 62.18023788                         | 55.90505245                    | 0.399196494                      | 0.13741176                                      | 28912.75801                                      |
| 25.12893983                         | 20.15948966                    | 0.448586118                      | 0.0515773                                       | 13495.02292                                      |
| 5.560488346                         | 2.593376948                    | 0.580541237                      | 0.017241111                                     | 2419.688124                                      |
| 34.14666667                         | 28.19306667                    | 0.409836066                      | 0.280832659                                     | 4857.613333                                      |
| 3.208333333                         | 1.081597222                    | 0.685714286                      | 0.051213938                                     | 974.2083333                                      |
| 242.3724189                         | 233.7792195                    | 0.341132075                      | 0.892856912                                     | 66653.66298                                      |
| 16.11931818                         | 12.09655863                    | 0.498583569                      | 0.050461054                                     | 5936.238636                                      |
| 7.636363636                         | 4.563348623                    | 0.570450098                      | 0.017594548                                     | 4256.594031                                      |
| 410.4111192                         | 401.4593354                    | 0.334229829                      | 1.100314449                                     | 154182.7366                                      |
| 1088.692356                         | 1075.671426                    | 0.277127111                      | 2.588018746                                     | 459712.2268                                      |
| 2.581521739                         | 0.690896739                    | 0.727272727                      | 0.009645946                                     | 2430.472826                                      |
| 38.94139887                         | 33.65748407                    | 0.435032895                      | 0.089551054                                     | 17970.85255                                      |
| 5.3                                 | 2.21244898                     | 0.569105691                      | 0.056490111                                     | 959.5                                            |
| 10.84653465                         | 7.326267033                    | 0.53298153                       | 0.021987361                                     | 8509.643564                                      |
| 60.05                               | 54.41635813                    | 0.421313507                      | 0.08345789                                      | 45297.27059                                      |



| wavelet.HHL_glszm_HighGrayLevelZoneEmphasis | wavelet.HHL_glszm_SmallAreaEmphasis | wavelet.HHL_glszm_LowGrayLevelZoneEmphasis | wavelet.HHL_glszm_ZoneEntropy | wavelet.HHL_glszm_SmallAreaLowGrayLevelEmphasis |
|---------------------------------------------|-------------------------------------|--------------------------------------------|-------------------------------|-------------------------------------------------|
| 622.8123324                                 | 0.729487872                         | 0.005486327                                | 6.119410634                   | 0.004901252                                     |
| 368.0089955                                 | 0.662130534                         | 0.005600667                                | 6.120937666                   | 0.004414215                                     |
| 361.4273504                                 | 0.753515287                         | 0.011075125                                | 5.711934004                   | 0.010080568                                     |
| 1941.453623                                 | 0.753571906                         | 0.001393484                                | 6.319110769                   | 0.001257376                                     |
| 92.86725664                                 | 0.598926541                         | 0.033650314                                | 5.429995999                   | 0.025686401                                     |
| 210.0615385                                 | 0.707827975                         | 0.013182654                                | 5.609223569                   | 0.010975979                                     |
| 390.9119171                                 | 0.727049929                         | 0.011328565                                | 5.730142906                   | 0.010321038                                     |
| 474.6816479                                 | 0.709252045                         | 0.0093677                                  | 6.188278813                   | 0.008536168                                     |
| 695.3808487                                 | 0.68991271                          | 0.003125655                                | 6.302740298                   | 0.002591503                                     |
| 544.3548164                                 | 0.713742263                         | 0.003677124                                | 6.231067622                   | 0.003028678                                     |
| 380.7606383                                 | 0.663767971                         | 0.006733983                                | 5.896331926                   | 0.005343261                                     |
| 505.2032885                                 | 0.705341386                         | 0.004680655                                | 6.216584632                   | 0.003921889                                     |
| 2128.039828                                 | 0.708212996                         | 0.001639627                                | 6.37703894                    | 0.00149156                                      |
| 200.9738372                                 | 0.669610913                         | 0.010982758                                | 5.695824628                   | 0.008614303                                     |
| 402.6724138                                 | 0.716179832                         | 0.006036626                                | 5.826034796                   | 0.005099785                                     |
| 818.6223849                                 | 0.724616594                         | 0.002760213                                | 6.287050048                   | 0.00226725                                      |
| 154.5148515                                 | 0.6805768                           | 0.017205457                                | 5.345406667                   | 0.014073478                                     |
| 654.6064356                                 | 0.699407074                         | 0.003427212                                | 6.241250331                   | 0.002865272                                     |
| 388.1078838                                 | 0.677119443                         | 0.010006677                                | 6.020127165                   | 0.008685874                                     |
| 274.758658                                  | 0.687020938                         | 0.008778894                                | 6.028638033                   | 0.007060474                                     |
| 457.0589155                                 | 0.730985845                         | 0.004089289                                | 6.08322234                    | 0.00332406                                      |
| 306.7290401                                 | 0.704147934                         | 0.008764233                                | 6.146694312                   | 0.007196889                                     |
| 411.4808836                                 | 0.714094071                         | 0.004944817                                | 6.10996497                    | 0.00403765                                      |
| 580.1672241                                 | 0.77513605                          | 0.009119578                                | 5.973704619                   | 0.00856509                                      |
| 1097.08769                                  | 0.751895553                         | 0.002979506                                | 5.965854402                   | 0.002727193                                     |
| 418.5073746                                 | 0.75104799                          | 0.007039138                                | 5.741477179                   | 0.006330662                                     |
| 750.6095842                                 | 0.699021706                         | 0.002430996                                | 6.274584505                   | 0.001973787                                     |
| 386.3285256                                 | 0.712915328                         | 0.006147609                                | 6.01567382                    | 0.005018487                                     |
| 758.5673469                                 | 0.734738138                         | 0.003614597                                | 6.440149971                   | 0.002922477                                     |
| 264.5613793                                 | 0.689761914                         | 0.009548941                                | 5.874268396                   | 0.00801564                                      |
| 290.6743869                                 | 0.675643848                         | 0.007528284                                | 6.171801901                   | 0.005847088                                     |
| 448.1645796                                 | 0.685528831                         | 0.003590635                                | 5.993520969                   | 0.002693324                                     |
| 557.5760266                                 | 0.721800444                         | 0.005137633                                | 6.179864181                   | 0.004471165                                     |
| 218.9636364                                 | 0.723338699                         | 0.047921164                                | 5.012911304                   | 0.04634479                                      |
| 354.5023697                                 | 0.761245641                         | 0.013496868                                | 5.793349128                   | 0.012536806                                     |
| 299.0250784                                 | 0.667118171                         | 0.006401299                                | 5.894755364                   | 0.004958825                                     |
| 520.871734                                  | 0.711691769                         | 0.003952057                                | 6.184239385                   | 0.003193433                                     |
| 329.7146136                                 | 0.697519518                         | 0.005769171                                | 6.009614028                   | 0.004593566                                     |
| 201.380117                                  | 0.663448856                         | 0.014714072                                | 5.904565814                   | 0.011971929                                     |
| 236.3949192                                 | 0.677397009                         | 0.01185911                                 | 5.902934385                   | 0.009828574                                     |
| 569.9417178                                 | 0.725332132                         | 0.004627304                                | 6.174214524                   | 0.004008102                                     |
| 205.2365269                                 | 0.709790051                         | 0.015541391                                | 5.641529192                   | 0.013520037                                     |
| 291.0875                                    | 0.67454932                          | 0.006959492                                | 5.905622833                   | 0.005520447                                     |
| 431.0072464                                 | 0.692840899                         | 0.00554203                                 | 5.912188572                   | 0.004642943                                     |
| 818.1750806                                 | 0.726390254                         | 0.002912353                                | 6.269673756                   | 0.001639769                                     |
| 359.529052                                  | 0.695375991                         | 0.00565095                                 | 5.958799936                   | 0.004648957                                     |
| 1806.91388                                  | 0.750591946                         | 0.001132277                                | 6.439288857                   | 0.000977209                                     |
| 278.36                                      | 0.722846884                         | 0.016169855                                | 5.7420131                     | 0.014017368                                     |
| 170.8235294                                 | 0.689843625                         | 0.03364125                                 | 5.230629569                   | 0.019622798                                     |
| 281.3956044                                 | 0.745955437                         | 0.018685519                                | 5.827632444                   | 0.016131984                                     |
| 298.4374421                                 | 0.665951769                         | 0.006501519                                | 6.097826551                   | 0.005082296                                     |
| 295.5457143                                 | 0.699696236                         | 0.009191859                                | 5.812514426                   | 0.007868054                                     |
| 466.7512953                                 | 0.706751357                         | 0.004797254                                | 6.25513657                    | 0.003976351                                     |
| 274.7314488                                 | 0.717740229                         | 0.016259914                                | 5.7997711667                  | 0.014670975                                     |
| 483.6153846                                 | 0.721913573                         | 0.003568377                                | 5.977732082                   | 0.002826948                                     |
| 228.4541284                                 | 0.738416121                         | 0.016291827                                | 5.857320283                   | 0.014034809                                     |
| 373.6444142                                 | 0.718805604                         | 0.005237325                                | 5.870082485                   | 0.00429228                                      |
| 238.6640777                                 | 0.697312033                         | 0.013792014                                | 5.970269817                   | 0.011571459                                     |
| 428.3606557                                 | 0.734414891                         | 0.008829582                                | 5.943462585                   | 0.005584338                                     |
| 794.8786885                                 | 0.71455499                          | 0.004839726                                | 5.825822089                   | 0.004428528                                     |
| 552.7223975                                 | 0.705139779                         | 0.004436514                                | 6.334335598                   | 0.003742176                                     |
| 766.5863469                                 | 0.716030528                         | 0.002356331                                | 6.36711219                    | 0.001872426                                     |
| 330.1709121                                 | 0.713762671                         | 0.00625963                                 | 5.993259431                   | 0.005132581                                     |
| 224.2412523                                 | 0.714351069                         | 0.011455873                                | 5.541556883                   | 0.009919496                                     |
| 205.6907216                                 | 0.690727581                         | 0.021962705                                | 5.377961038                   | 0.019577611                                     |
| 659.7360913                                 | 0.745835337                         | 0.004657036                                | 6.141521533                   | 0.003635081                                     |
| 452.5339367                                 | 0.733098458                         | 0.008045318                                | 5.805049027                   | 0.007309663                                     |
| 333.2488564                                 | 0.683903933                         | 0.005974784                                | 6.06747007                    | 0.004751692                                     |
| 116.8975904                                 | 0.679788364                         | 0.034045348                                | 5.485934465                   | 0.027681407                                     |
| 777.5476865                                 | 0.722123215                         | 0.002752359                                | 6.22775713                    | 0.002325991                                     |
| 229.0960086                                 | 0.718033783                         | 0.008035853                                | 5.655117069                   | 0.006458779                                     |
| 171.4968944                                 | 0.690179246                         | 0.012999916                                | 5.515813077                   | 0.010550119                                     |
| 642.9811715                                 | 0.692076853                         | 0.002764456                                | 5.959512888                   | 0.002230333                                     |
| 676.701087                                  | 0.704808463                         | 0.002386939                                | 6.136133147                   | 0.001887082                                     |
| 996.7188063                                 | 0.719237642                         | 0.001693337                                | 6.394173796                   | 0.001364457                                     |
| 424.4594059                                 | 0.716654944                         | 0.005583024                                | 5.966147508                   | 0.004610276                                     |
| 456.7251462                                 | 0.704219947                         | 0.008256132                                | 6.099160581                   | 0.005926418                                     |
| 284.1407942                                 | 0.710614764                         | 0.011067137                                | 5.794595814                   | 0.00933441                                      |
| 379.8735795                                 | 0.72083648                          | 0.007758916                                | 6.034744488                   | 0.006804752                                     |
| 807.6743516                                 | 0.720942401                         | 0.002610489                                | 6.243069055                   | 0.002190785                                     |
| 315.776                                     | 0.743908791                         | 0.013447944                                | 5.707348671                   | 0.011423464                                     |
| 472.0296774                                 | 0.755005368                         | 0.006129479                                | 5.996219283                   | 0.005447213                                     |
| 786.4329643                                 | 0.753483554                         | 0.002879847                                | 6.254274639                   | 0.002367098                                     |
| 375.96875                                   | 0.629255081                         | 0.020479889                                | 5.296569531                   | 0.00657362                                      |
| 457.2587992                                 | 0.713871429                         | 0.004488479                                | 6.113899553                   | 0.003674593                                     |
| 495.2680695                                 | 0.692088033                         | 0.003584549                                | 6.245484362                   | 0.00281483                                      |
| 593.8710602                                 | 0.724102471                         | 0.005387297                                | 5.986264144                   | 0.004826736                                     |
| 482.3862375                                 | 0.728824417                         | 0.004971365                                | 6.197052348                   | 0.004161831                                     |
| 175.9333333                                 | 0.732444723                         | 0.036569359                                | 4.840299151                   | 0.033267614                                     |
| 312.9166667                                 | 0.777416088                         | 0.041725202                                | 5.171670793                   | 0.040487309                                     |
| 297.9336283                                 | 0.687791995                         | 0.007110466                                | 6.081026476                   | 0.005683731                                     |
| 402.0710227                                 | 0.703088469                         | 0.007123592                                | 5.885913225                   | 0.006174349                                     |
| 609.787307                                  | 0.753134634                         | 0.004560375                                | 6.115907436                   | 0.004007415                                     |
| 408.1806876                                 | 0.712957266                         | 0.004874963                                | 6.07121827                    | 0.003985369                                     |
| 440.1758856                                 | 0.688480033                         | 0.003560263                                | 5.936829412                   | 0.002714392                                     |
| 949.5434783                                 | 0.807393523                         | 0.007599668                                | 5.831136501                   | 0.007347355                                     |
| 519.9168242                                 | 0.701160615                         | 0.005269627                                | 6.098150822                   | 0.004473881                                     |
| 237.7428571                                 | 0.682161715                         | 0.025206613                                | 5.160019139                   | 0.022999958                                     |
| 948.0792079                                 | 0.722772964                         | 0.007051576                                | 5.999201801                   | 0.006228231                                     |
| 809.9117647                                 | 0.752745756                         | 0.00459752                                 | 5.845567521                   | 0.004252542                                     |

| wavelet.HHL_ngtdm_Coarseness | wavelet.HHL_ngtdm_Complexity | wavelet.HHL_ngtdm_Strength | wavelet.HHL_ngtdm_Busyness | wavelet.HHL_ngtdm_Contrast | wavelet.LLL_gldm_GrayLevelVariance |
|------------------------------|------------------------------|----------------------------|----------------------------|----------------------------|------------------------------------|
| 0.009540868                  | 4.393594589                  | 4.679667017                | 0.094635589                | 0.000311531                | 943.0112452                        |
| 0.003670921                  | 0.555790036                  | 1.378912539                | 0.317759145                | 2.90E-05                   | 895.1719317                        |
| 0.013384007                  | 3.643142444                  | 3.877739331                | 0.137303787                | 0.000568504                | 306.6450763                        |
| 0.002858455                  | 2.552788851                  | 3.541882553                | 0.101526819                | 4.47E-05                   | 1226.296932                        |
| 0.017878917                  | 0.56711223                   | 1.200053809                | 0.428738009                | 0.000381144                | 486.5526338                        |
| 0.010098643                  | 1.122522997                  | 1.803415234                | 0.26194674                 | 0.00020328                 | 579.9162073                        |
| 0.017843726                  | 5.261032494                  | 5.865555158                | 0.089568286                | 0.000734877                | 165.1698615                        |
| 0.006818175                  | 2.794310145                  | 3.217497686                | 0.155774496                | 0.00020067                 | 810.6925032                        |
| 0.003333401                  | 1.477588313                  | 2.444239861                | 0.195640105                | 4.38E-05                   | 864.724265                         |
| 0.002244337                  | 0.909091672                  | 1.364991007                | 0.339734794                | 3.05E-05                   | 545.5076079                        |
| 0.007414869                  | 1.596603719                  | 2.319238627                | 0.199734682                | 0.000157852                | 469.8044066                        |
| 0.004605759                  | 1.595453769                  | 2.288778848                | 0.203231693                | 8.55E-05                   | 763.0593082                        |
| 0.003577114                  | 2.311823807                  | 4.982620181                | 0.083088525                | 4.38E-05                   | 513.3479952                        |
| 0.005863801                  | 0.469109056                  | 1.036909202                | 0.453804226                | 7.92E-05                   | 609.9594575                        |
| 0.006882912                  | 1.854291598                  | 2.520809929                | 0.176030689                | 0.000137025                | 619.7141101                        |
| 0.001168555                  | 0.704795211                  | 3.313734861                | 0.28607744                 | 3.67E-06                   | 704.1932613                        |
| 0.009343803                  | 0.600271391                  | 1.395165465                | 0.362581389                | 0.000114232                | 728.8367275                        |
| 0.003275003                  | 0.817507571                  | 1.88975466                 | 0.220784747                | 2.98E-05                   | 935.1153156                        |
| 0.011329383                  | 3.368918033                  | 4.826539912                | 0.099290363                | 0.000209615                | 678.5592665                        |
| 0.002648727                  | 0.400835697                  | 1.018759462                | 0.519540402                | 1.95E-05                   | 670.8070551                        |
| 0.001478409                  | 0.409837087                  | 0.853393457                | 0.54955723                 | 1.17E-05                   | 513.9298578                        |
| 0.003554627                  | 1.25970136                   | 1.509812413                | 0.390208442                | 8.48E-05                   | 427.4469862                        |
| 0.002667571                  | 0.680191634                  | 1.13177364                 | 0.39281258                 | 3.57E-05                   | 636.431819                         |
| 0.013074709                  | 9.468210542                  | 8.145843693                | 0.069010334                | 0.000661555                | 847.570645                         |
| 0.00578641                   | 2.741682856                  | 4.390325732                | 0.088481397                | 9.05E-05                   | 372.8143867                        |
| 0.008949255                  | 2.517869509                  | 3.952739105                | 0.137352429                | 0.000190436                | 615.3383904                        |
| 0.002004168                  | 0.80026616                   | 1.39270934                 | 0.313366382                | 2.27E-05                   | 378.6240093                        |
| 0.004337725                  | 1.215398713                  | 1.526329006                | 0.298988826                | 9.54E-05                   | 339.41416                          |
| 0.003073299                  | 3.350254649                  | 2.382749647                | 0.2229947                  | 0.00015445                 | 754.1630232                        |
| 0.003073818                  | 0.302694628                  | 0.847930973                | 0.508606919                | 2.08E-05                   | 885.2096697                        |
| 0.002006447                  | 0.452825578                  | 0.632453582                | 0.797807462                | 4.15E-05                   | 340.1707648                        |
| 0.001244436                  | 0.184167839                  | 0.617076223                | 0.757840468                | 5.87E-06                   | 689.051044                         |
| 0.003364577                  | 1.410707968                  | 2.032521973                | 0.240288244                | 5.40E-05                   | 1238.28                            |
| 0.056303729                  | 6.315314463                  | 8.14383885                 | 0.058679858                | 0.000325878                | 222.5050851                        |
| 0.016723595                  | 7.513619749                  | 6.335429915                | 0.093051619                | 0.000936174                | 609.1906935                        |
| 0.00338687                   | 0.406397463                  | 0.903914593                | 0.477952641                | 3.17E-05                   | 933.1813575                        |
| 0.002329786                  | 0.984477856                  | 1.464553509                | 0.340911402                | 3.18E-05                   | 454.9146986                        |
| 0.002124396                  | 0.398095437                  | 0.727012231                | 0.608677211                | 2.39E-05                   | 751.1952432                        |
| 0.007414194                  | 1.163364877                  | 1.766212958                | 0.306370541                | 0.000154563                | 697.5102356                        |
| 0.006543756                  | 0.892482433                  | 1.454763765                | 0.316540276                | 0.000118323                | 1083.771591                        |
| 0.004766978                  | 1.804379952                  | 2.585476433                | 0.176159049                | 7.89E-05                   | 725.8563638                        |
| 0.006821843                  | 0.64704553                   | 1.280350924                | 0.375890825                | 0.000106213                | 782.2026053                        |
| 0.004110036                  | 0.481157744                  | 0.953254881                | 0.424430748                | 5.01E-05                   | 896.8055474                        |
| 0.006592868                  | 1.027949621                  | 1.885648399                | 0.220171521                | 0.000112067                | 731.1913347                        |
| 0.003846297                  | 1.823100791                  | 2.512602296                | 0.165831315                | 7.62E-05                   | 540.2031439                        |
| 0.003023532                  | 0.609665493                  | 1.113533636                | 0.405529737                | 3.61E-05                   | 504.0644668                        |
| 0.001741853                  | 2.439281983                  | 3.541178258                | 0.135840244                | 2.13E-05                   | 841.3843975                        |
| 0.011344505                  | 1.736370211                  | 2.419674488                | 0.190807334                | 0.000332855                | 591.1486515                        |
| 0.042189729                  | 4.369735882                  | 5.655345346                | 0.10284058                 | 0.001959479                | 418.3009579                        |
| 0.011721839                  | 3.540860076                  | 3.478280191                | 0.19947632                 | 0.000634523                | 407.9357837                        |
| 0.002086968                  | 0.313187213                  | 0.738199908                | 0.640220046                | 1.60E-05                   | 778.6157606                        |
| 0.007545554                  | 1.38105939                   | 2.251304667                | 0.216669502                | 0.000132859                | 785.7110022                        |
| 0.001791691                  | 0.655944013                  | 0.980992797                | 0.500618815                | 2.55E-05                   | 874.0151401                        |
| 0.010954239                  | 2.564784836                  | 3.371036415                | 0.157495675                | 0.000284391                | 601.6991992                        |
| 0.001181507                  | 0.225101474                  | 0.804520632                | 0.64137113                 | 4.77E-06                   | 869.7421149                        |
| 0.007439816                  | 1.611297298                  | 2.08363611                 | 0.293894836                | 0.000211254                | 1251.913246                        |
| 0.00311109                   | 0.483894972                  | 0.984205315                | 0.442214328                | 3.63E-05                   | 1015.59026                         |
| 0.004957324                  | 0.846718615                  | 1.292181358                | 0.396978844                | 0.000100268                | 445.173466                         |
| 0.009379437                  | 2.287657749                  | 4.09745375                 | 0.104652498                | 0.000123386                | 1103.240183                        |
| 0.007985876                  | 2.089927716                  | 5.308226268                | 0.089359295                | 9.10E-05                   | 591.5157474                        |
| 0.003362531                  | 1.45016396                   | 2.036416201                | 0.225254036                | 5.39E-05                   | 902.5060179                        |
| 0.001261751                  | 0.973044409                  | 1.522817827                | 0.379441005                | 1.50E-05                   | 900.7029042                        |
| 0.002418779                  | 0.477259097                  | 0.945650983                | 0.485015685                | 2.31E-05                   | 578.5473931                        |
| 0.002665644                  | 0.165680684                  | 0.793117343                | 0.642954276                | 8.90E-06                   | 708.4500522                        |
| 0.029376414                  | 2.98535963                   | 4.80560392                 | 0.093556897                | 0.00073623                 | 821.633545                         |
| 0.004854918                  | 2.064342372                  | 3.037265268                | 0.138582338                | 7.70E-05                   | 1263.956793                        |
| 0.01533044                   | 0.435749028                  | 1.191996553                | 0.112233184                | 0.000730884                | 330.6734069                        |
| 0.00242845                   | 0.368389305                  | 0.836092042                | 0.54997028                 | 1.86E-05                   | 1081.529959                        |
| 0.013672729                  | 1.106424287                  | 2.039841198                | 0.340469238                | 0.000305034                | 738.3266907                        |
| 0.003267625                  | 1.752407824                  | 2.176717574                | 0.205068686                | 6.59E-05                   | 673.6187374                        |
| 0.002348118                  | 0.240500801                  | 0.672701004                | 0.737670062                | 1.50E-05                   | 950.8701003                        |
| 0.006152303                  | 0.336126091                  | 0.799726084                | 0.510267507                | 7.17E-05                   | 893.9356886                        |
| 0.001449859                  | 0.298554475                  | 1.063767602                | 0.45721551                 | 5.50E-06                   | 822.6572735                        |
| 0.001192359                  | 0.313265373                  | 0.958148003                | 0.475041307                | 5.08E-06                   | 743.0856908                        |
| 0.000834117                  | 0.528560772                  | 1.011226995                | 0.465630027                | 6.47E-06                   | 791.9061041                        |
| 0.00566177                   | 1.621821617                  | 2.396295226                | 0.208716122                | 0.000107283                | 882.960804                         |
| 0.006045049                  | 1.721120494                  | 2.351763309                | 0.181083044                | 0.000136733                | 652.0638428                        |
| 0.010718962                  | 2.035950677                  | 3.116933089                | 0.180622899                | 0.000262439                | 549.6148052                        |
| 0.00387164                   | 0.963389546                  | 1.787603061                | 0.28729773                 | 4.78E-05                   | 855.7317669                        |
| 0.00233008                   | 1.375235368                  | 1.878688897                | 0.246141776                | 3.75E-05                   | 327.6461007                        |
| 0.013662543                  | 3.360676561                  | 4.423503775                | 0.107968537                | 0.000336252                | 1374.60108                         |
| 0.00468545                   | 2.065664784                  | 2.244525091                | 0.227749245                | 0.000132872                | 891.9282326                        |
| 0.002383904                  | 1.586466129                  | 1.645884965                | 0.275399712                | 6.68E-05                   | 970.3862375                        |
| 0.040334537                  | 5.660389823                  | 8.766470157                | 0.048657779                | 0.002095598                | 408.5890131                        |
| 0.002038886                  | 0.620293457                  | 1.072015057                | 0.444756414                | 2.40E-05                   | 650.6212293                        |
| 0.001247618                  | 0.367861685                  | 0.636948687                | 0.724212605                | 1.50E-05                   | 490.7632907                        |
| 0.008224575                  | 2.872799207                  | 3.980660495                | 0.113665319                | 0.000184088                | 775.3597386                        |
| 0.003906494                  | 2.127659325                  | 2.042477177                | 0.26554994                 | 0.000132302                | 635.6125381                        |
| 0.038784849                  | 2.631612449                  | 5.860211874                | 0.093476847                | 0.000872699                | 1035.808892                        |
| 0.046000531                  | 19.03352219                  | 12.77089082                | 0.050186499                | 0.005895557                | 304.5659864                        |
| 0.001867337                  | 0.303123039                  | 0.680932326                | 0.704623969                | 1.56E-05                   | 1012.635004                        |
| 0.008669874                  | 2.162699955                  | 2.660005903                | 0.163426306                | 0.000249537                | 921.2535872                        |
| 0.006350112                  | 3.406082382                  | 3.09969096                 | 0.141421622                | 0.000223323                | 814.6067264                        |
| 0.001856831                  | 0.448702531                  | 1.132407742                | 0.465956726                | 1.19E-05                   | 792.5632152                        |
| 0.001259501                  | 0.173146798                  | 0.514925775                | 0.821316834                | 6.98E-06                   | 665.5144127                        |
| 0.022422326                  | 19.80461869                  | 13.17925957                | 0.036053108                | 0.002005755                | 1294.185349                        |
| 0.005751193                  | 1.878437303                  | 2.889572875                | 0.157249406                | 9.38E-05                   | 1032.18394                         |
| 0.042789079                  | 8.062549883                  | 10.13755975                | 0.06612148                 | 0.002234212                | 654.3062992                        |
| 0.018156166                  | 12.48696554                  | 16.64324695                | 0.036295062                | 0.000855469                | 349.5169207                        |
| 0.009188537                  | 2.754027409                  | 5.123912062                | 0.074239511                | 0.000127893                | 747.0496999                        |

| wavelet.LLL_gldm_HighGrayLevelEmphasis | wavelet.LLL_gldm_GrayLevelNonUniformityNormalized | wavelet.LLL_gldm_DependenceEntropy | wavelet.LLL_gldm_DependenceNonUniformity | wavelet.LLL_gldm_GrayLevelNonUniformity |
|----------------------------------------|---------------------------------------------------|------------------------------------|------------------------------------------|-----------------------------------------|
| 5472.148725                            | 0.013181231                                       | 7.307876826                        | 358.101983                               | 9.305949008                             |
| 7509.943669                            | 0.017018593                                       | 7.809222962                        | 712.7284545                              | 35.34761675                             |
| 1975.198157                            | 0.017955361                                       | 6.880144768                        | 202.6267281                              | 7.792626728                             |
| 5693.862239                            | 0.009722427                                       | 7.879392295                        | 1358.406452                              | 25.61859583                             |
| 2012.771588                            | 0.017139842                                       | 6.774843702                        | 193.8412256                              | 6.153203343                             |
| 2708.956454                            | 0.013087467                                       | 7.193949321                        | 349.2674961                              | 8.415241058                             |
| 671.2195846                            | 0.028150287                                       | 6.546682768                        | 120.9406528                              | 9.486646884                             |
| 3941.552894                            | 0.010585615                                       | 7.482949622                        | 549.9361277                              | 10.60678643                             |
| 4969.718134                            | 0.010505893                                       | 7.716097745                        | 1058.076479                              | 21.84175084                             |
| 6599.432537                            | 0.012644823                                       | 7.787245661                        | 1315.989671                              | 39.17366043                             |
| 2583.024184                            | 0.013728033                                       | 7.205509959                        | 432.1777509                              | 11.35308343                             |
| 6700.167341                            | 0.011683158                                       | 7.755472202                        | 702.5506073                              | 17.31443995                             |
| 3688.295564                            | 0.012294385                                       | 7.572839716                        | 1001.99325                               | 25.49855352                             |
| 3505.997317                            | 0.011720713                                       | 7.353039823                        | 614.2808587                              | 13.10375671                             |
| 3461.271131                            | 0.012554207                                       | 7.448141298                        | 443.4829857                              | 11.43688255                             |
| 9349.070534                            | 0.045275184                                       | 7.814376508                        | 1301.865985                              | 314.5267022                             |
| 3083.588825                            | 0.012052446                                       | 7.248699124                        | 406.0286533                              | 8.41260745                              |
| 5930.186106                            | 0.01204658                                        | 7.784032222                        | 1056.97084                               | 28.09262436                             |
| 3612.214777                            | 0.012387667                                       | 7.158955153                        | 323.1580756                              | 7.209621993                             |
| 6811.747947                            | 0.013674032                                       | 8.044410741                        | 981.6961799                              | 38.30096394                             |
| 5627.466501                            | 0.023931689                                       | 7.599263998                        | 1827.445253                              | 125.0191424                             |
| 3738.646512                            | 0.013719578                                       | 7.572541481                        | 754.8337209                              | 23.59767442                             |
| 5548.024167                            | 0.015003699                                       | 7.561254325                        | 1241.944709                              | 40.9751007                              |
| 3539.476091                            | 0.011639818                                       | 7.166196818                        | 282.4261954                              | 5.598752599                             |
| 5107.031561                            | 0.01629397                                        | 7.317445846                        | 506.9601329                              | 19.6179402                              |
| 4791.589337                            | 0.012474151                                       | 7.441800095                        | 301.4639769                              | 8.657060519                             |
| 3981.636757                            | 0.01531754                                        | 7.965143138                        | 1124.169648                              | 53.09059435                             |
| 4830.939288                            | 0.016456382                                       | 7.404419536                        | 596.2365666                              | 23.58199581                             |
| 4814.415864                            | 0.010266674                                       | 7.763110437                        | 856.4016997                              | 18.12067989                             |
| 8317.521637                            | 0.022385838                                       | 7.788390007                        | 809.7584579                              | 56.90479937                             |
| 6382.726644                            | 0.016811826                                       | 7.516107079                        | 1308.655867                              | 53.44479396                             |
| 7190.413828                            | 0.013234959                                       | 7.930625257                        | 2411.724115                              | 78.48330523                             |
| 5715.489424                            | 0.009746463                                       | 7.876980761                        | 1043.138711                              | 19.81455976                             |
| 968.7403846                            | 0.030325444                                       | 5.813279502                        | 54.67307692                              | 3.153846154                             |
| 3119.743976                            | 0.013808245                                       | 6.897617146                        | 186.626506                               | 4.584337349                             |
| 3832.790594                            | 0.010107833                                       | 7.646039534                        | 1122.968317                              | 20.41782178                             |
| 8533.803472                            | 0.014823254                                       | 7.716844072                        | 1149.891667                              | 42.69097222                             |
| 5890.939475                            | 0.012509561                                       | 7.86144834                         | 1444.145498                              | 41.95706619                             |
| 3331.71976                             | 0.011291907                                       | 7.501885419                        | 406.3772455                              | 9.428742515                             |
| 5520.169685                            | 0.010862404                                       | 7.487057767                        | 600.7044805                              | 11.39466158                             |
| 5469.738806                            | 0.012161961                                       | 7.826024646                        | 595.2957938                              | 17.92672999                             |
| 3372.296957                            | 0.012088627                                       | 7.330355687                        | 532.2717733                              | 11.5204617                              |
| 3412.298417                            | 0.010797563                                       | 7.54236875                         | 905.4250914                              | 17.72959805                             |
| 3068.277073                            | 0.011447472                                       | 7.419514406                        | 560.0029268                              | 11.73365854                             |
| 2783.320021                            | 0.012346309                                       | 7.519714337                        | 922.3162939                              | 23.18636848                             |
| 4482.45781                             | 0.017940026                                       | 7.432707475                        | 902.4057451                              | 39.97037702                             |
| 5854.064229                            | 0.010468738                                       | 8.008823198                        | 1934.227848                              | 44.65963432                             |
| 3504.555746                            | 0.013677995                                       | 7.139428517                        | 314.3413379                              | 7.974271012                             |
| 1362.716418                            | 0.026509245                                       | 6.065052135                        | 61.88059701                              | 3.552238806                             |
| 1897.243461                            | 0.016505471                                       | 7.039490733                        | 228.8028169                              | 8.203219316                             |
| 4525.922021                            | 0.013272516                                       | 7.804254463                        | 1448.235397                              | 45.44509346                             |
| 2994.59734                             | 0.011511429                                       | 7.276667995                        | 482.2793229                              | 9.519951632                             |
| 6260.253599                            | 0.01074086                                        | 8.1782135                          | 1515.821251                              | 41.04082701                             |
| 3432.443316                            | 0.013401817                                       | 7.307881519                        | 720.6920474                              | 9.270473773                             |
| 8364.289997                            | 0.036929739                                       | 7.671302383                        | 1717.634984                              | 74.80926874                             |
| 6702.85438                             | 0.008991239                                       | 7.578235637                        | 505.7554039                              | 7.903299204                             |
| 5782.885089                            | 0.009587152                                       | 7.76313211                         | 1200.744642                              | 21.0246238                              |
| 2240.363496                            | 0.014505497                                       | 7.417119458                        | 589.4532096                              | 18.75560712                             |
| 6225.5086                              | 0.013730841                                       | 7.523647415                        | 358.8378378                              | 11.17690418                             |
| 5587.325766                            | 0.013526833                                       | 7.400338626                        | 432.0601589                              | 11.91713961                             |
| 5344.266163                            | 0.011487116                                       | 7.636489506                        | 1047.564417                              | 24.34119868                             |
| 5962.072107                            | 0.009871542                                       | 8.063509222                        | 2450.857247                              | 54.07630522                             |
| 5631.686731                            | 0.017927127                                       | 7.757281612                        | 1056.098382                              | 55.39482201                             |
| 6301.803003                            | 0.027646691                                       | 7.836395555                        | 725.9227389                              | 75.50311241                             |
| 3446.18894                             | 0.015523795                                       | 6.67955129                         | 128.3364055                              | 3.368663594                             |
| 8391.099807                            | 0.012560282                                       | 7.704479057                        | 729.7057308                              | 19.50611719                             |
| 1919.525381                            | 0.017921101                                       | 6.815638294                        | 193.4162437                              | 7.060913706                             |
| 6150.952143                            | 0.011767659                                       | 7.798423821                        | 1532.347513                              | 37.62120738                             |
| 2756.874439                            | 0.012698828                                       | 7.075742372                        | 250.4798206                              | 5.66367713                              |
| 5384.587767                            | 0.011138885                                       | 7.738591626                        | 952.4778717                              | 22.40029836                             |
| 6530.124671                            | 0.012623572                                       | 7.744310195                        | 1438.233553                              | 38.37565789                             |
| 4334.91674                             | 0.010885418                                       | 7.429247387                        | 633.2816652                              | 12.28963685                             |
| 6353.348104                            | 0.020333138                                       | 7.76524894                         | 1928.116873                              | 105.0816563                             |
| 6969.602144                            | 0.025546188                                       | 7.711797432                        | 2198.581298                              | 171.5681954                             |
| 7720.999564                            | 0.015803181                                       | 8.270332939                        | 2779.472767                              | 145.0732026                             |
| 5176.498208                            | 0.010147287                                       | 7.458631999                        | 677.8763441                              | 11.32437276                             |
| 3127.148612                            | 0.011344975                                       | 7.499401632                        | 559.0286482                              | 12.67233662                             |
| 2794.044262                            | 0.013313625                                       | 7.11710547                         | 342.9016393                              | 8.121311475                             |
| 4981.827664                            | 0.010209866                                       | 7.703189005                        | 894.978458                               | 18.01020408                             |
| 4311.446943                            | 0.016220816                                       | 7.525195616                        | 1191.555868                              | 46.16444132                             |
| 5756.305556                            | 0.009747417                                       | 7.268426014                        | 332.2063492                              | 4.912698413                             |
| 4095.521999                            | 0.010097977                                       | 7.522895136                        | 780.2766592                              | 13.54138702                             |
| 7310.526862                            | 0.00921226                                        | 7.991914638                        | 1355.909026                              | 25.72063037                             |
| 1387.2                                 | 0.023638526                                       | 6.15323308                         | 73.30344828                              | 3.427586207                             |
| 5384.596874                            | 0.01342835                                        | 7.586678136                        | 1608.867886                              | 45.53553524                             |
| 4927.087107                            | 0.013053174                                       | 8.046172796                        | 1952.65924                               | 71.47918188                             |
| 4239.393316                            | 0.011967936                                       | 7.275572998                        | 422.1542416                              | 9.311053985                             |
| 4862.539304                            | 0.01182777                                        | 7.648859171                        | 779.314433                               | 17.3556701                              |
| 4272.983607                            | 0.019439219                                       | 6.563220262                        | 93.53551913                              | 3.557377049                             |
| 846.7904762                            | 0.028752834                                       | 5.66063418                         | 56.73333333                              | 3.019047619                             |
| 6193.52                                | 0.014273296                                       | 8.001695577                        | 1606.861635                              | 56.7363522                              |
| 6120.562323                            | 0.011162918                                       | 7.337647708                        | 406.6232295                              | 7.88101983                              |
| 6011.295499                            | 0.010573642                                       | 7.705744804                        | 453.888454                               | 10.80626223                             |
| 6505.077017                            | 0.013113862                                       | 8.01575707                         | 1657.665037                              | 53.63569682                             |
| 6669.922494                            | 0.01740001                                        | 7.802887154                        | 2217.685498                              | 101.0244575                             |
| 4871.454545                            | 0.011357778                                       | 6.945121268                        | 163.4189723                              | 2.873517787                             |
| 3763.965461                            | 0.011137141                                       | 7.69412108                         | 559.8766447                              | 13.54276316                             |
| 2042.626016                            | 0.02452244                                        | 5.931102896                        | 79.68292683                              | 3.016260163                             |
| 1462.153034                            | 0.018205109                                       | 6.829062578                        | 174.2770449                              | 6.899736148                             |
| 7824.299876                            | 0.015043401                                       | 7.401821692                        | 359.5154895                              | 12.14002478                             |

| wavelet.LLL_gldm_SmallDependenceEmphasis | wavelet.LLL_gldm_DependenceNonUniformityNormalized | wavelet.LLL_gldm_DependenceVariance | wavelet.LLL_gldm_LargeDependenceEmphasis |
|------------------------------------------|----------------------------------------------------|-------------------------------------|------------------------------------------|
| 0.732952631                              | 0.507226605                                        | 0.733967851                         | 2.920679887                              |
| 0.593294601                              | 0.343152843                                        | 1.668616243                         | 5.435243139                              |
| 0.694200589                              | 0.466881862                                        | 0.521884092                         | 2.778801843                              |
| 0.742355359                              | 0.51552427                                         | 0.634416428                         | 2.75483871                               |
| 0.757287991                              | 0.539947704                                        | 0.414909878                         | 2.331476323                              |
| 0.757176862                              | 0.543184286                                        | 0.41898759                          | 2.321292846                              |
| 0.586512529                              | 0.358874341                                        | 0.861449867                         | 4.020771513                              |
| 0.762516633                              | 0.548838451                                        | 0.350516532                         | 2.203592814                              |
| 0.733613783                              | 0.508935295                                        | 0.519904374                         | 2.600769601                              |
| 0.652581146                              | 0.424786853                                        | 0.754562076                         | 3.353131052                              |
| 0.740599557                              | 0.522584947                                        | 0.399901159                         | 2.363966143                              |
| 0.70856372                               | 0.47405574                                         | 0.879283749                         | 3.275303644                              |
| 0.706910425                              | 0.483121143                                        | 0.462007925                         | 2.613307618                              |
| 0.761531753                              | 0.549446206                                        | 0.365439819                         | 2.223613596                              |
| 0.717151177                              | 0.486808985                                        | 0.543724041                         | 2.729967069                              |
| 0.405098204                              | 0.187399739                                        | 6.779878928                         | 17.0388657                               |
| 0.787137456                              | 0.581702942                                        | 0.323946437                         | 2.068767908                              |
| 0.691378385                              | 0.453246501                                        | 0.874008868                         | 3.38593482                               |
| 0.768357675                              | 0.555254425                                        | 0.385269423                         | 2.237113402                              |
| 0.601365233                              | 0.350480607                                        | 3.30211312                          | 7.662620493                              |
| 0.605353114                              | 0.349817238                                        | 4.916891851                         | 9.808575804                              |
| 0.66861741                               | 0.438856814                                        | 0.671031639                         | 3.153488372                              |
| 0.695529484                              | 0.454758224                                        | 1.473243786                         | 4.187110948                              |
| 0.793788981                              | 0.587164647                                        | 0.343878182                         | 2.097713098                              |
| 0.658960935                              | 0.421063233                                        | 1.087824638                         | 3.84717608                               |
| 0.660287784                              | 0.434386134                                        | 0.562798462                         | 3.011527378                              |
| 0.55443597                               | 0.32434208                                         | 1.500388075                         | 5.340450087                              |
| 0.649877879                              | 0.416075762                                        | 0.728377897                         | 3.369853454                              |
| 0.711075858                              | 0.485213428                                        | 0.506468714                         | 2.674787535                              |
| 0.578550688                              | 0.318551714                                        | 4.792701807                         | 10.26042486                              |
| 0.640932724                              | 0.411656454                                        | 0.700441845                         | 3.358603334                              |
| 0.649386413                              | 0.406698839                                        | 1.444739613                         | 4.481618887                              |
| 0.738524848                              | 0.513103154                                        | 0.586551608                         | 2.679291687                              |
| 0.740918803                              | 0.525702663                                        | 0.332840237                         | 2.25                                     |
| 0.772464859                              | 0.56212803                                         | 0.333901873                         | 2.138554217                              |
| 0.770939906                              | 0.555924909                                        | 0.383534948                         | 2.23960396                               |
| 0.633006269                              | 0.39926794                                         | 0.832775849                         | 3.643055556                              |
| 0.668996606                              | 0.43057409                                         | 1.033674581                         | 3.736434109                              |
| 0.707867598                              | 0.486679336                                        | 0.400823264                         | 2.504191617                              |
| 0.785156233                              | 0.572644881                                        | 0.566642524                         | 2.485224023                              |
| 0.623454332                              | 0.379440837                                        | 1.182033584                         | 4.327001357                              |
| 0.770964498                              | 0.558522323                                        | 0.34726368                          | 2.171038825                              |
| 0.766599844                              | 0.551416012                                        | 0.367642324                         | 2.225334957                              |
| 0.762608401                              | 0.546344319                                        | 0.369366805                         | 2.242926829                              |
| 0.71925216                               | 0.491116237                                        | 0.522570065                         | 2.673056443                              |
| 0.650863852                              | 0.405029509                                        | 1.170607319                         | 4.12567325                               |
| 0.690100217                              | 0.453405497                                        | 0.787242381                         | 3.248007501                              |
| 0.755369259                              | 0.539178967                                        | 0.393593202                         | 2.300171527                              |
| 0.700184494                              | 0.4617955                                          | 0.724883047                         | 3.134328358                              |
| 0.690448245                              | 0.460367841                                        | 0.543534851                         | 2.839034205                              |
| 0.664027311                              | 0.422965945                                        | 1.516283832                         | 4.443341121                              |
| 0.787743182                              | 0.583167259                                        | 0.344801873                         | 2.097944377                              |
| 0.639446667                              | 0.396707996                                        | 1.323031627                         | 4.380266946                              |
| 0.676825061                              | 0.458023769                                        | 0.506875553                         | 2.810490694                              |
| 0.511564719                              | 0.263319789                                        | 3.793380134                         | 9.945270581                              |
| 0.784042789                              | 0.575375886                                        | 0.340157978                         | 2.114903299                              |
| 0.764299919                              | 0.547535176                                        | 0.451335749                         | 2.361605107                              |
| 0.684489774                              | 0.455880286                                        | 0.538729275                         | 2.857695282                              |
| 0.688503962                              | 0.440832725                                        | 1.74546179                          | 4.84029484                               |
| 0.716978497                              | 0.490420158                                        | 0.484561837                         | 2.61861521                               |
| 0.723271197                              | 0.494367351                                        | 0.546295333                         | 2.701746107                              |
| 0.684065736                              | 0.447400009                                        | 0.931437656                         | 3.480467324                              |
| 0.58402752                               | 0.341179412                                        | 1.498849405                         | 5.164401294                              |
| 0.512401426                              | 0.265808399                                        | 3.9604578                           | 10.0530941                               |
| 0.797803379                              | 0.591412007                                        | 0.506742551                         | 2.35483871                               |
| 0.708733718                              | 0.469868468                                        | 0.930292573                         | 3.421120412                              |
| 0.716123801                              | 0.490904172                                        | 0.46641243                          | 2.588832487                              |
| 0.714481244                              | 0.479307949                                        | 1.003997237                         | 3.437284955                              |
| 0.77105132                               | 0.561613948                                        | 0.299442981                         | 2.085201794                              |
| 0.705264656                              | 0.473633949                                        | 0.580178981                         | 2.836897066                              |
| 0.710283724                              | 0.473103142                                        | 0.892776575                         | 3.317763158                              |
| 0.775242102                              | 0.560922644                                        | 0.417759981                         | 2.280779451                              |
| 0.626220333                              | 0.37308763                                         | 2.526243902                         | 6.366873065                              |
| 0.579981226                              | 0.327364696                                        | 3.390388256                         | 8.095592615                              |
| 0.54039088                               | 0.302774811                                        | 1.914077729                         | 6.272984749                              |
| 0.804012346                              | 0.607416079                                        | 0.246213435                         | 1.883512545                              |
| 0.725038546                              | 0.500473275                                        | 0.432229506                         | 2.496866607                              |
| 0.767657104                              | 0.562133835                                        | 0.291437786                         | 2.072131148                              |
| 0.730708144                              | 0.507357403                                        | 0.480662635                         | 2.544217687                              |
| 0.650522807                              | 0.418677396                                        | 1.057857831                         | 3.80604357                               |
| 0.839161706                              | 0.659139582                                        | 0.306547619                         | 1.869047619                              |
| 0.786587953                              | 0.581861789                                        | 0.346191724                         | 2.102162565                              |
| 0.711786453                              | 0.485640769                                        | 0.501286422                         | 2.664040115                              |
| 0.730017241                              | 0.505541023                                        | 0.494839477                         | 2.572413793                              |
| 0.707076445                              | 0.47445234                                         | 0.644431228                         | 2.930404011                              |
| 0.584193975                              | 0.35658496                                         | 1.042962424                         | 4.303506209                              |
| 0.760764781                              | 0.542614706                                        | 0.438009265                         | 2.36503856                               |
| 0.724226804                              | 0.502135588                                        | 0.42334467                          | 2.476804124                              |
| 0.742753491                              | 0.511123055                                        | 0.893547135                         | 3.25136612                               |
| 0.751851852                              | 0.54031746                                         | 0.307120181                         | 2.161904762                              |
| 0.653286006                              | 0.404241921                                        | 2.138962857                         | 5.488553459                              |
| 0.783620554                              | 0.575953583                                        | 0.315964336                         | 2.073654391                              |
| 0.681809344                              | 0.444117861                                        | 0.828803505                         | 3.360078278                              |
| 0.650182244                              | 0.405297075                                        | 1.943469731                         | 5.188753056                              |
| 0.62902905                               | 0.381964433                                        | 1.387983305                         | 4.63244919                               |
| 0.830698287                              | 0.645924792                                        | 0.232436064                         | 1.782608696                              |
| 0.690000457                              | 0.460424872                                        | 0.583351368                         | 2.902960526                              |
| 0.83197832                               | 0.647828673                                        | 0.233194527                         | 1.780487805                              |
| 0.667784374                              | 0.459833891                                        | 0.397755515                         | 2.65171504                               |
| 0.688750334                              | 0.445496269                                        | 0.916482021                         | 3.515489467                              |

| wavelet.LLL_gldm_LargeDependenceLowGrayLevelEmphasis | wavelet.LLL_gldm_SmallDependenceHighGrayLevelEmphasis | wavelet.LLL_gldm_LargeDependenceHighGrayLevelEmphasis |
|------------------------------------------------------|-------------------------------------------------------|-------------------------------------------------------|
| 0.002661871                                          | 3625.905905                                           | 21764.48017                                           |
| 0.002303019                                          | 3669.840774                                           | 54225.74049                                           |
| 0.026513932                                          | 1301.988987                                           | 6035.589862                                           |
| 0.004628404                                          | 4012.557646                                           | 19222.91499                                           |
| 0.011975562                                          | 1568.116459                                           | 4341.796657                                           |
| 0.00611775                                           | 1955.047528                                           | 8078.213064                                           |
| 0.027535625                                          | 453.9509248                                           | 2154.964392                                           |
| 0.004873208                                          | 2918.821503                                           | 9276.115768                                           |
| 0.00247752                                           | 3325.322611                                           | 15752.7215                                            |
| 0.001049578                                          | 4016.306797                                           | 25823.89025                                           |
| 0.005694068                                          | 1887.917222                                           | 6370.412334                                           |
| 0.001598172                                          | 4449.022235                                           | 26288.26586                                           |
| 0.002194168                                          | 2560.326062                                           | 10103.89055                                           |
| 0.004066901                                          | 2615.91866                                            | 8046.00805                                            |
| 0.004195655                                          | 2534.847672                                           | 9063.745335                                           |
| 0.002609071                                          | 2990.928736                                           | 19729.712                                             |
| 0.005576432                                          | 2374.584485                                           | 7163.070201                                           |
| 0.002249316                                          | 3569.077881                                           | 27306.23671                                           |
| 0.003887204                                          | 2681.748624                                           | 8558.400344                                           |
| 0.001599058                                          | 3514.059345                                           | 74170.57051                                           |
| 0.001913524                                          | 2829.35063                                            | 80037.76359                                           |
| 0.00252079                                           | 2396.498946                                           | 12990.06163                                           |
| 0.001858799                                          | 3388.374457                                           | 32712.30978                                           |
| 0.0065591                                            | 2893.009659                                           | 7046.370062                                           |
| 0.001908034                                          | 3101.823926                                           | 24228.7907                                            |
| 0.01478871                                           | 2891.921267                                           | 16926.56628                                           |
| 0.002527438                                          | 2048.272708                                           | 24467.65003                                           |
| 0.001585334                                          | 2988.771094                                           | 17889.91486                                           |
| 0.003236099                                          | 3498.118899                                           | 12449.01756                                           |
| 0.002014051                                          | 3796.38009                                            | 118213.0928                                           |
| 0.000983189                                          | 3883.362649                                           | 23213.08336                                           |
| 0.00110712                                           | 4208.371199                                           | 42609.95582                                           |
| 0.006704621                                          | 3990.415477                                           | 18511.58091                                           |
| 0.018192189                                          | 743.1244658                                           | 2148.682692                                           |
| 0.005954541                                          | 2400.268595                                           | 6660.418675                                           |
| 0.013856304                                          | 2861.243238                                           | 9105.315347                                           |
| 0.000880034                                          | 5083.11543                                            | 35125.00556                                           |
| 0.001567718                                          | 3636.89855                                            | 28102.89117                                           |
| 0.009397672                                          | 2439.696407                                           | 7874.819162                                           |
| 0.003181444                                          | 3853.7651                                             | 18477.0143                                            |
| 0.002478843                                          | 2907.288669                                           | 31672.39417                                           |
| 0.00440338                                           | 2573.526226                                           | 7918.865687                                           |
| 0.007474426                                          | 2582.878413                                           | 7706.723508                                           |
| 0.005713232                                          | 2268.557175                                           | 7234.542439                                           |
| 0.005328372                                          | 2059.949443                                           | 6964.402023                                           |
| 0.001875295                                          | 2498.069372                                           | 24733.61311                                           |
| 0.00150377                                           | 3804.278487                                           | 23094.23394                                           |
| 0.003647574                                          | 2554.305501                                           | 8907.773585                                           |
| 0.074099253                                          | 1141.216503                                           | 2684.223881                                           |
| 0.012348305                                          | 1400.580497                                           | 4601.93159                                            |
| 0.008565749                                          | 2605.882015                                           | 29960.54585                                           |
| 0.011858462                                          | 2273.933368                                           | 6427.886336                                           |
| 0.006518096                                          | 3596.425247                                           | 36558.78069                                           |
| 0.006438869                                          | 2191.088432                                           | 10908.81895                                           |
| 0.002743777                                          | 3460.513089                                           | 106170.8786                                           |
| 0.00241662                                           | 4985.951713                                           | 16463.66439                                           |
| 0.001776379                                          | 4276.652055                                           | 15135.61286                                           |
| 0.006296412                                          | 1681.478129                                           | 5154.326373                                           |
| 0.003478179                                          | 3457.319705                                           | 47362.14251                                           |
| 0.002106333                                          | 3876.447266                                           | 15851.98411                                           |
| 0.002952003                                          | 3426.989777                                           | 18843.72251                                           |
| 0.002188299                                          | 3744.310901                                           | 27413.46641                                           |
| 0.001690574                                          | 2836.092018                                           | 37010.05825                                           |
| 0.00716941                                           | 2747.710257                                           | 77167.97876                                           |
| 0.011552914                                          | 2448.687916                                           | 11352.81567                                           |
| 0.0014253                                            | 5246.120581                                           | 38322.3593                                            |
| 0.006314292                                          | 1327.6823                                             | 5429.535533                                           |
| 0.002117023                                          | 3841.674761                                           | 29949.2493                                            |
| 0.010274963                                          | 2094.522795                                           | 5868.493274                                           |
| 0.001458284                                          | 3622.951842                                           | 17567.00149                                           |
| 0.002723394                                          | 4120.54922                                            | 28857.32401                                           |
| 0.004147856                                          | 3066.69185                                            | 12252.71125                                           |
| 0.002004755                                          | 3306.808947                                           | 57565.56018                                           |
| 0.002716098                                          | 3266.690967                                           | 77846.20756                                           |
| 0.002065868                                          | 3646.330171                                           | 58771.58802                                           |
| 0.001893909                                          | 4060.720729                                           | 10307.43369                                           |
| 0.007654143                                          | 2164.437879                                           | 8339.866607                                           |
| 0.007733959                                          | 2061.460462                                           | 6289.283607                                           |
| 0.00274319                                           | 3345.632182                                           | 15599.29478                                           |
| 0.001595386                                          | 2672.554062                                           | 18988.11314                                           |
| 0.009176395                                          | 4525.715347                                           | 13247.45635                                           |
| 0.00494301                                           | 3191.271646                                           | 9129.706935                                           |
| 0.001477097                                          | 5035.067004                                           | 21357.67658                                           |
| 0.017516042                                          | 1181.336285                                           | 2413.434483                                           |
| 0.002068274                                          | 3508.839881                                           | 19210.12622                                           |
| 0.002279314                                          | 2698.191806                                           | 23943.16052                                           |
| 0.015181677                                          | 2917.170094                                           | 12382.4036                                            |
| 0.001989202                                          | 3416.822451                                           | 12816.17848                                           |
| 0.018587432                                          | 2862.472999                                           | 17817.07104                                           |
| 0.153183643                                          | 659.0201058                                           | 1727.438095                                           |
| 0.00375323                                           | 3552.019265                                           | 46702.04377                                           |
| 0.003069006                                          | 4357.848993                                           | 15311.48017                                           |
| 0.002287979                                          | 3694.642467                                           | 26823.41683                                           |
| 0.001668398                                          | 3741.722233                                           | 45795.51125                                           |
| 0.001192175                                          | 3690.747259                                           | 39021.13882                                           |
| 0.009470457                                          | 4178.614625                                           | 8279.810277                                           |
| 0.005914236                                          | 2544.203057                                           | 12648.19572                                           |
| 0.013172275                                          | 1589.83243                                            | 4269.04878                                            |
| 0.014339652                                          | 1040.595665                                           | 3492.073879                                           |
| 0.002243955                                          | 4758.512708                                           | 33792.36679                                           |

| wavelet.LLL_gldm_SmallDependenceLowGrayLevelEmphasis | wavelet.LLL_gldm_LowGrayLevelEmphasis | wavelet.LLL_gldm_DistanceZoneVariabilityNormalized | wavelet.LLL_gldm_LowIntensityEmphasis |
|------------------------------------------------------|---------------------------------------|----------------------------------------------------|---------------------------------------|
| 0.001881223                                          | 0.002010279                           | 0.883201834                                        | 0.002400033                           |
| 0.000972042                                          | 0.00114845                            | 0.87171358                                         | 0.001556381                           |
| 0.006342464                                          | 0.010320693                           | 0.841424935                                        | 0.009945938                           |
| 0.002012291                                          | 0.002367265                           | 0.840361261                                        | 0.002621238                           |
| 0.007430246                                          | 0.00804957                            | 0.84439354                                         | 0.00924291                            |
| 0.003237283                                          | 0.003782716                           | 0.802469136                                        | 0.004127815                           |
| 0.007366046                                          | 0.009625172                           | 0.701965432                                        | 0.011634043                           |
| 0.00195429                                           | 0.002460719                           | 0.806443446                                        | 0.002541783                           |
| 0.0015363                                            | 0.001697118                           | 0.89767763                                         | 0.001976616                           |
| 0.000534836                                          | 0.000610058                           | 0.919063678                                        | 0.000756419                           |
| 0.002830231                                          | 0.003324068                           | 0.83493215                                         | 0.003657033                           |
| 0.001094588                                          | 0.001169009                           | 0.845166763                                        | 0.00144041                            |
| 0.000997151                                          | 0.001187347                           | 0.888697934                                        | 0.001337504                           |
| 0.001789003                                          | 0.002101343                           | 0.867611455                                        | 0.002257085                           |
| 0.002205998                                          | 0.002499504                           | 0.819106769                                        | 0.002902788                           |
| 0.000402014                                          | 0.000561237                           | 0.882355001                                        | 0.000959541                           |
| 0.003560506                                          | 0.003920778                           | 0.69320672                                         | 0.00432376                            |
| 0.001055224                                          | 0.001249793                           | 0.94055182                                         | 0.001467787                           |
| 0.002877176                                          | 0.003050245                           | 0.780091402                                        | 0.00351414                            |
| 0.000617601                                          | 0.000706596                           | 0.934586485                                        | 0.000958551                           |
| 0.000566182                                          | 0.000662664                           | 0.838215544                                        | 0.000890121                           |
| 0.001251099                                          | 0.001444124                           | 0.822730257                                        | 0.00173523                            |
| 0.000957852                                          | 0.001089675                           | 0.88791661                                         | 0.001316688                           |
| 0.003765515                                          | 0.004209222                           | 0.661668589                                        | 0.004577498                           |
| 0.001110897                                          | 0.001219264                           | 0.845801608                                        | 0.001559308                           |
| 0.001392941                                          | 0.003876469                           | 0.904652584                                        | 0.002939423                           |
| 0.000716569                                          | 0.000925685                           | 0.863375196                                        | 0.00120075                            |
| 0.000936372                                          | 0.001027703                           | 0.917659553                                        | 0.001314836                           |
| 0.001755889                                          | 0.001995345                           | 0.926800447                                        | 0.002309729                           |
| 0.000947466                                          | 0.001032774                           | 0.910716231                                        | 0.001555004                           |
| 0.000483009                                          | 0.000553297                           | 0.9418                                             | 0.00069156                            |
| 0.000397518                                          | 0.000487247                           | 0.934256882                                        | 0.000583947                           |
| 0.002299498                                          | 0.002906696                           | 0.895788279                                        | 0.003063838                           |
| 0.013913182                                          | 0.014725934                           | 0.808673469                                        | 0.017536837                           |
| 0.004255909                                          | 0.004537767                           | 0.790771699                                        | 0.005167833                           |
| 0.002235314                                          | 0.003955424                           | 0.832858227                                        | 0.003088491                           |
| 0.00048249                                           | 0.000537958                           | 0.934224969                                        | 0.000695408                           |
| 0.00066017                                           | 0.000791873                           | 0.897774454                                        | 0.000940751                           |
| 0.003849461                                          | 0.004711929                           | 0.760741216                                        | 0.005171156                           |
| 0.002217898                                          | 0.002395612                           | 0.923367862                                        | 0.0027197                             |
| 0.00136631                                           | 0.001513027                           | 0.78235186                                         | 0.002022479                           |
| 0.002518722                                          | 0.002841753                           | 0.85390111                                         | 0.003135645                           |
| 0.003037411                                          | 0.003673489                           | 0.875386014                                        | 0.003849672                           |
| 0.003025403                                          | 0.003427942                           | 0.782360562                                        | 0.003793238                           |
| 0.001473422                                          | 0.001934249                           | 0.833710413                                        | 0.001986212                           |
| 0.000982338                                          | 0.001095939                           | 0.946251357                                        | 0.001413209                           |
| 0.000604825                                          | 0.000736705                           | 0.782820982                                        | 0.000843361                           |
| 0.00261642                                           | 0.002797687                           | 0.90106389                                         | 0.00325046                            |
| 0.006422895                                          | 0.018905635                           | 0.689349112                                        | 0.013466005                           |
| 0.003551422                                          | 0.004913714                           | 0.761012582                                        | 0.005127667                           |
| 0.002446675                                          | 0.003443406                           | 0.904605517                                        | 0.003730274                           |
| 0.005745369                                          | 0.006720206                           | 0.91286953                                         | 0.007084669                           |
| 0.000820784                                          | 0.001623412                           | 0.901561087                                        | 0.001468463                           |
| 0.003267009                                          | 0.003856168                           | 0.855957031                                        | 0.004550978                           |
| 0.000620063                                          | 0.000850321                           | 0.941088991                                        | 0.001196403                           |
| 0.001689148                                          | 0.00182223                            | 0.784798861                                        | 0.002048538                           |
| 0.000913297                                          | 0.001043894                           | 0.68279375                                         | 0.001145643                           |
| 0.001680231                                          | 0.00227056                            | 0.692627824                                        | 0.002379627                           |
| 0.00235359                                           | 0.002477389                           | 0.847913555                                        | 0.003220838                           |
| 0.001639628                                          | 0.001711647                           | 0.949472216                                        | 0.002106008                           |
| 0.002097086                                          | 0.002242817                           | 0.900333306                                        | 0.002709177                           |
| 0.000736003                                          | 0.000958964                           | 0.908548652                                        | 0.001056368                           |
| 0.000627186                                          | 0.000766033                           | 0.938817095                                        | 0.001010597                           |
| 0.001414988                                          | 0.002372887                           | 0.921945288                                        | 0.003074763                           |
| 0.009223952                                          | 0.00965916                            | 0.868016364                                        | 0.011097263                           |
| 0.00094193                                           | 0.001013476                           | 0.867552419                                        | 0.001252679                           |
| 0.004434538                                          | 0.004733077                           | 0.744103386                                        | 0.005705444                           |
| 0.000999462                                          | 0.001168961                           | 0.931363865                                        | 0.001349564                           |
| 0.006420837                                          | 0.007005625                           | 0.821288157                                        | 0.007884088                           |
| 0.00079631                                           | 0.000900825                           | 0.899312231                                        | 0.001062467                           |
| 0.001793361                                          | 0.001936366                           | 0.85976602                                         | 0.002374224                           |
| 0.002054741                                          | 0.002380924                           | 0.904904159                                        | 0.002572202                           |
| 0.00094811                                           | 0.001071825                           | 0.911255526                                        | 0.00143519                            |
| 0.00080146                                           | 0.001052996                           | 0.925505278                                        | 0.001365718                           |
| 0.000545444                                          | 0.000755769                           | 0.93441125                                         | 0.000986595                           |
| 0.001318253                                          | 0.00142495                            | 0.760427618                                        | 0.001565643                           |
| 0.002588912                                          | 0.003270611                           | 0.804217509                                        | 0.003467236                           |
| 0.004995368                                          | 0.005467193                           | 0.85240559                                         | 0.006113726                           |
| 0.001412334                                          | 0.001635227                           | 0.802101504                                        | 0.001848166                           |
| 0.000666707                                          | 0.000787808                           | 0.85050658                                         | 0.000954774                           |
| 0.00451084                                           | 0.005425073                           | 0.75693978                                         | 0.005445212                           |
| 0.001990455                                          | 0.00250019                            | 0.7656281                                          | 0.002538646                           |
| 0.000996608                                          | 0.001072285                           | 0.895916329                                        | 0.001292661                           |
| 0.008891628                                          | 0.010168335                           | 0.737812128                                        | 0.011491556                           |
| 0.000936493                                          | 0.001115632                           | 0.941035755                                        | 0.001265474                           |
| 0.000704737                                          | 0.000924656                           | 0.788849961                                        | 0.001142162                           |
| 0.004888878                                          | 0.006919045                           | 0.896758429                                        | 0.006748999                           |
| 0.001175142                                          | 0.001297498                           | 0.79209717                                         | 0.001512512                           |
| 0.010117475                                          | 0.011373161                           | 0.793008323                                        | 0.013248163                           |
| 0.023239618                                          | 0.046051021                           | 0.812601406                                        | 0.035879611                           |
| 0.001426765                                          | 0.001754029                           | 0.862154821                                        | 0.002136276                           |
| 0.002738908                                          | 0.002799747                           | 0.919497211                                        | 0.003271838                           |
| 0.001376968                                          | 0.001514382                           | 0.823760986                                        | 0.00188165                            |
| 0.00065618                                           | 0.000781997                           | 0.899888353                                        | 0.000960948                           |
| 0.000465326                                          | 0.000556015                           | 0.907088407                                        | 0.000703676                           |
| 0.008391932                                          | 0.008600353                           | 0.642381709                                        | 0.009598591                           |
| 0.002506089                                          | 0.003043114                           | 0.925807219                                        | 0.003448483                           |
| 0.011926492                                          | 0.012168001                           | 0.788237311                                        | 0.013670641                           |
| 0.004680111                                          | 0.006088274                           | 0.741126543                                        | 0.006629724                           |
| 0.001898062                                          | 0.001941765                           | 0.821586119                                        | 0.002541076                           |

| wavelet.LLL_gldzm_LargeDistanceEmphasis | wavelet.LLL_gldzm_HighIntensitySmallDistanceEmphasis | wavelet.LLL_gldzm_LowIntensityLargeDistanceEmphasis | wavelet.LLL_gldzm_HighIntensityEmphasis |
|-----------------------------------------|------------------------------------------------------|-----------------------------------------------------|-----------------------------------------|
| 1.18683274                              | 4715.152135                                          | 0.002441903                                         | 5013.846975                             |
| 1.206666667                             | 5952.636667                                          | 0.001592977                                         | 6295.12                                 |
| 1.260479042                             | 1744.29491                                           | 0.0100743                                           | 1902.383234                             |
| 1.262411348                             | 5130.924468                                          | 0.002729719                                         | 5412.29078                              |
| 1.255102041                             | 1844.958333                                          | 0.009355567                                         | 2068.465986                             |
| 1.333333333                             | 2275.064972                                          | 0.004224297                                         | 2606.745763                             |
| 1.546666667                             | 586.9566667                                          | 0.012435509                                         | 744.32                                  |
| 1.325693607                             | 3422.16345                                           | 0.002612658                                         | 3866.914355                             |
| 1.162259615                             | 4455.397686                                          | 0.002022424                                         | 4636.668269                             |
| 1.126760563                             | 6020.693112                                          | 0.000778051                                         | 6232.608715                             |
| 1.272321429                             | 2359.082961                                          | 0.003778803                                         | 2553.80506                              |
| 1.253705318                             | 5870.609416                                          | 0.001478478                                         | 6347.643418                             |
| 1.177449168                             | 3484.950246                                          | 0.001395588                                         | 3644.745533                             |
| 1.213822894                             | 3265.021058                                          | 0.002329738                                         | 3455.99568                              |
| 1.301675978                             | 3255.945182                                          | 0.003019309                                         | 3513.022346                             |
| 1.188284519                             | 7051.141374                                          | 0.000993054                                         | 7420.226585                             |
| 1.567567568                             | 2377.213682                                          | 0.004509768                                         | 3015.866554                             |
| 1.091993186                             | 5115.988075                                          | 0.001484268                                         | 5259.252129                             |
| 1.377319588                             | 3027.787629                                          | 0.003597736                                         | 3524.773196                             |
| 1.101558302                             | 5767.914159                                          | 0.000978699                                         | 5909.947877                             |
| 1.266318538                             | 4347.340078                                          | 0.000943411                                         | 4724.89208                              |
| 1.294891641                             | 3355.135836                                          | 0.001855074                                         | 3623.971362                             |
| 1.17877907                              | 4679.177204                                          | 0.001347243                                         | 4961.278585                             |
| 1.647058824                             | 2907.619485                                          | 0.004812726                                         | 3619.345588                             |
| 1.252559727                             | 4431.396189                                          | 0.001610678                                         | 4772.915813                             |
| 1.150579151                             | 4260.059846                                          | 0.002968603                                         | 4480.57722                              |
| 1.221255153                             | 3527.38147                                           | 0.001292721                                         | 3729.61246                              |
| 1.129063098                             | 4441.711998                                          | 0.001340819                                         | 4639.946463                             |
| 1.114142139                             | 4693.616834                                          | 0.002332096                                         | 4891.257717                             |
| 1.140506329                             | 6413.016614                                          | 0.001576866                                         | 6675.294937                             |
| 1.09                                    | 5994.194348                                          | 0.00070769                                          | 6145.94087                              |
| 1.102088712                             | 6382.532211                                          | 0.000600157                                         | 6558.383009                             |
| 1.165441176                             | 5231.259651                                          | 0.003106952                                         | 5448.055147                             |
| 1.321428571                             | 782.0982143                                          | 0.017777498                                         | 981.6785714                             |
| 1.356115108                             | 2763.360612                                          | 0.005295293                                         | 3123.482014                             |
| 1.276128266                             | 3488.995546                                          | 0.003180527                                         | 3749.381829                             |
| 1.102140078                             | 7892.958901                                          | 0.000707875                                         | 8122.995136                             |
| 1.162096774                             | 5259.375504                                          | 0.000982932                                         | 5464.907258                             |
| 1.416793893                             | 3022.805725                                          | 0.005420338                                         | 3406.644275                             |
| 1.11972634                              | 4866.594641                                          | 0.002741769                                         | 5046.329532                             |
| 1.372798434                             | 4283.143836                                          | 0.002121111                                         | 4742.818982                             |
| 1.238035264                             | 3067.809194                                          | 0.003197012                                         | 3325.807305                             |
| 1.20029347                              | 3165.469369                                          | 0.003902339                                         | 3389.623624                             |
| 1.372781065                             | 2574.607396                                          | 0.003898876                                         | 2996.621302                             |
| 1.274562584                             | 2608.855485                                          | 0.002090509                                         | 2841.343876                             |
| 1.082914573                             | 3795.064698                                          | 0.001429418                                         | 3907.084171                             |
| 1.371862411                             | 5058.70189                                           | 0.000947033                                         | 5527.704059                             |
| 1.1565762                               | 3215.658664                                          | 0.003286654                                         | 3402.219207                             |
| 1.576923077                             | 892.4375                                             | 0.013628963                                         | 1534.423077                             |
| 1.416230366                             | 1728.015052                                          | 0.005367166                                         | 1981.795812                             |
| 1.150657633                             | 3835.474791                                          | 0.003777414                                         | 3987.60821                              |
| 1.136947218                             | 2830.018188                                          | 0.007137035                                         | 2940.336662                             |
| 1.155743741                             | 5468.691458                                          | 0.001514565                                         | 5672.738954                             |
| 1.234375                                | 3082.219866                                          | 0.00462691                                          | 3278.328125                             |
| 1.091135046                             | 6685.663974                                          | 0.001213401                                         | 6830.635184                             |
| 1.367924528                             | 5808.990566                                          | 0.00212316                                          | 6432.428571                             |
| 1.593042518                             | 4357.638183                                          | 0.001233843                                         | 5644.425732                             |
| 1.568965517                             | 1903.175203                                          | 0.002654782                                         | 2398.457404                             |
| 1.248756219                             | 4745.577114                                          | 0.003272564                                         | 5126.268657                             |
| 1.077809798                             | 5307.681196                                          | 0.00211879                                          | 5430.304035                             |
| 1.157800359                             | 4577.462343                                          | 0.002736217                                         | 4832.456067                             |
| 1.144098479                             | 5386.284637                                          | 0.001111311                                         | 5528.546223                             |
| 1.094768016                             | 4855.860192                                          | 0.001037272                                         | 4952.36772                              |
| 1.122047244                             | 5263.462434                                          | 0.003101101                                         | 5418.125328                             |
| 1.213114754                             | 2849.407104                                          | 0.011138602                                         | 3139.857923                             |
| 1.213926174                             | 7184.26552                                           | 0.00130523                                          | 7527.731544                             |
| 1.451923077                             | 1476.957532                                          | 0.005857126                                         | 1859.253205                             |
| 1.106752932                             | 5327.766175                                          | 0.001372904                                         | 5475.840679                             |
| 1.297587131                             | 2406.786193                                          | 0.007964924                                         | 2724.844504                             |
| 1.159513133                             | 4991.881006                                          | 0.001105848                                         | 5165.518258                             |
| 1.227621483                             | 5501.778133                                          | 0.002414215                                         | 5902.035806                             |
| 1.150159744                             | 3836.142173                                          | 0.002604995                                         | 4034.089457                             |
| 1.139614075                             | 5179.653093                                          | 0.001471233                                         | 5357.916005                             |
| 1.116246499                             | 5578.875                                             | 0.001386456                                         | 5771.77591                              |
| 1.101840272                             | 6753.487359                                          | 0.001024725                                         | 6855.656066                             |
| 1.417445483                             | 4393.923378                                          | 0.001641101                                         | 5089.973001                             |
| 1.32996633                              | 2662.158249                                          | 0.003565775                                         | 3022.090909                             |
| 1.240704501                             | 2497.721624                                          | 0.006190682                                         | 2720.189824                             |
| 1.334042553                             | 4132.134929                                          | 0.001908284                                         | 4659.086525                             |
| 1.24410207                              | 3867.216538                                          | 0.001030859                                         | 4145.933077                             |
| 1.424719101                             | 4595.361798                                          | 0.00506663                                          | 5481.602247                             |
| 1.406690141                             | 3586.987016                                          | 0.002725973                                         | 4051.78169                              |
| 1.165225307                             | 6956.701525                                          | 0.001342586                                         | 7133.645881                             |
| 1.465517241                             | 1060.946121                                          | 0.011638768                                         | 1549.008621                             |
| 1.091220068                             | 4921.051881                                          | 0.001284431                                         | 5042.217788                             |
| 1.359901397                             | 4319.148795                                          | 0.001276626                                         | 4663.650233                             |
| 1.163806552                             | 3748.388846                                          | 0.006789216                                         | 3934.862715                             |
| 1.353510896                             | 4200.239104                                          | 0.001589035                                         | 4761.35109                              |
| 1.351724138                             | 3585.82931                                           | 0.013383131                                         | 3904.744828                             |
| 1.313953488                             | 665.2819767                                          | 0.036046418                                         | 866.5348837                             |
| 1.223404255                             | 5186.146188                                          | 0.002192577                                         | 5474.48156                              |
| 1.12605042                              | 5472.754622                                          | 0.00328993                                          | 5711.761345                             |
| 1.29296875                              | 5125.598633                                          | 0.001988146                                         | 5479.304688                             |
| 1.158378747                             | 5620.255109                                          | 0.000991005                                         | 5846.652929                             |
| 1.146523798                             | 5733.306005                                          | 0.000731585                                         | 5957.234737                             |
| 1.69955157                              | 3499.015695                                          | 0.009710744                                         | 4944.067265                             |
| 1.115755627                             | 3620.883708                                          | 0.003535158                                         | 3670.721329                             |
| 1.361111111                             | 1484.969907                                          | 0.013760255                                         | 1939.185185                             |
| 1.458333333                             | 1283.804688                                          | 0.006918958                                         | 1529.447917                             |
| 1.297029703                             | 6371.278053                                          | 0.002573037                                         | 7094.805281                             |

| wavelet.LLL_gldzm_DistanceZoneVariability | wavelet.LLL_gldzm_ZonePercentage | wavelet.LLL_gldzm_IntensityVariabilityNormalized | wavelet.LLL_gldzm_LowintensitySmallDistanceEmphasis | wavelet.LLL_gldzm_IntensityVariability |
|-------------------------------------------|----------------------------------|--------------------------------------------------|-----------------------------------------------------|----------------------------------------|
| 496.3594306                               | 0.796033994                      | 0.011803295                                      | 0.002402066                                         | 6.633451957                            |
| 1176.813333                               | 0.649975927                      | 0.011721262                                      | 0.001547232                                         | 15.8237037                             |
| 281.0359281                               | 0.769585253                      | 0.0117523                                        | 0.009913847                                         | 5.736526946                            |
| 1777.364066                               | 0.802656546                      | 0.009054988                                      | 0.002594117                                         | 19.15130024                            |
| 248.2517007                               | 0.818941504                      | 0.016150678                                      | 0.009214746                                         | 4.74829932                             |
| 426.1111111                               | 0.825816485                      | 0.013019531                                      | 0.004103695                                         | 6.913370998                            |
| 157.9422222                               | 0.667655786                      | 0.024750617                                      | 0.011433676                                         | 5.568888889                            |
| 668.5416164                               | 0.827345309                      | 0.010713854                                      | 0.002524065                                         | 8.881785283                            |
| 1493.735577                               | 0.8003848                        | 0.010245961                                      | 0.001965163                                         | 17.04927885                            |
| 2088.112676                               | 0.733376372                      | 0.012172064                                      | 0.000751011                                         | 27.65492958                            |
| 561.0744048                               | 0.812575574                      | 0.013578869                                      | 0.003626591                                         | 9.125                                  |
| 969.4062772                               | 0.773954116                      | 0.010468916                                      | 0.001430893                                         | 12.00784656                            |
| 1442.356747                               | 0.782545805                      | 0.012272368                                      | 0.001322983                                         | 19.91805299                            |
| 803.4082073                               | 0.828264758                      | 0.011851061                                      | 0.002238922                                         | 10.97408207                            |
| 586.4804469                               | 0.785949506                      | 0.012144596                                      | 0.002873658                                         | 8.695530726                            |
| 2741.476987                               | 0.447243414                      | 0.014939427                                      | 0.000951163                                         | 46.41680077                            |
| 410.3783784                               | 0.848137536                      | 0.011715897                                      | 0.004277258                                         | 6.935810811                            |
| 1656.311755                               | 0.755145798                      | 0.010501686                                      | 0.001463667                                         | 18.49346962                            |
| 378.3443299                               | 0.833333333                      | 0.012060793                                      | 0.003493241                                         | 5.849484536                            |
| 1739.265449                               | 0.664405569                      | 0.011127759                                      | 0.000953514                                         | 20.70875873                            |
| 2889.328982                               | 0.659839204                      | 0.013981962                                      | 0.000876799                                         | 48.19582245                            |
| 1062.967492                               | 0.751162791                      | 0.013564062                                      | 0.001705269                                         | 17.5247678                             |
| 1832.659884                               | 0.755761718                      | 0.012264512                                      | 0.00130905                                          | 25.31395349                            |
| 269.9607843                               | 0.848232848                      | 0.011293733                                      | 0.004518691                                         | 4.607843137                            |
| 743.4596132                               | 0.730066445                      | 0.01553244                                       | 0.001546466                                         | 13.65301479                            |
| 468.6100386                               | 0.746397695                      | 0.012149491                                      | 0.002932129                                         | 6.293436223                            |
| 1884.748053                               | 0.62983266                       | 0.01408271                                       | 0.001177757                                         | 30.74255612                            |
| 959.8718929                               | 0.729937195                      | 0.015444432                                      | 0.00130834                                          | 16.15487572                            |
| 1291.033022                               | 0.789235127                      | 0.010302255                                      | 0.002304138                                         | 14.35104092                            |
| 1438.931646                               | 0.621557828                      | 0.011829034                                      | 0.001549539                                         | 18.68987342                            |
| 2166.14                                   | 0.723497955                      | 0.016046881                                      | 0.000687527                                         | 36.90782609                            |
| 3980.86875                                | 0.718549747                      | 0.011461975                                      | 0.000579894                                         | 48.8394743                             |
| 1461.926471                               | 0.80275455                       | 0.009010957                                      | 0.003053059                                         | 14.70588235                            |
| 67.92857143                               | 0.807692308                      | 0.026927438                                      | 0.017476672                                         | 2.261904762                            |
| 219.8345324                               | 0.837349398                      | 0.013379225                                      | 0.005135968                                         | 3.71942446                             |
| 1402.533254                               | 0.833663366                      | 0.010041413                                      | 0.003065481                                         | 16.90973872                            |
| 1920.766537                               | 0.713888889                      | 0.013906815                                      | 0.000692292                                         | 28.59241245                            |
| 2226.480645                               | 0.739415623                      | 0.010883845                                      | 0.000930206                                         | 26.99193548                            |
| 498.2854962                               | 0.784431138                      | 0.01121846                                       | 0.005108861                                         | 7.348091603                            |
| 809.7936146                               | 0.836034318                      | 0.010067232                                      | 0.002714183                                         | 8.828962372                            |
| 799.5636008                               | 0.693351425                      | 0.011048518                                      | 0.001997821                                         | 11.29158513                            |
| 677.9974817                               | 0.833158447                      | 0.011795012                                      | 0.003120303                                         | 9.365239295                            |
| 1193.151137                               | 0.830085262                      | 0.01072846                                       | 0.003836506                                         | 14.62289068                            |
| 661.0946746                               | 0.824390244                      | 0.011432373                                      | 0.003766828                                         | 9.66035503                             |
| 1238.893674                               | 0.791267306                      | 0.012305067                                      | 0.001960138                                         | 18.28532974                            |
| 1506.432161                               | 0.71454219                       | 0.013901164                                      | 0.001409157                                         | 22.13065327                            |
| 2526.16331                                | 0.75644632                       | 0.009850935                                      | 0.000817443                                         | 31.78896808                            |
| 431.6096033                               | 0.82161235                       | 0.013123199                                      | 0.003241411                                         | 6.286012526                            |
| 71.69230769                               | 0.776119403                      | 0.02237426                                       | 0.013425265                                         | 2.326923077                            |
| 290.7068063                               | 0.76861167                       | 0.015761629                                      | 0.005067792                                         | 6.020942408                            |
| 2269.655241                               | 0.732768692                      | 0.01113552                                       | 0.003718489                                         | 27.93901953                            |
| 639.9215407                               | 0.84764208                       | 0.011251503                                      | 0.007071578                                         | 7.887303852                            |
| 2448.639912                               | 0.710808689                      | 0.009833724                                      | 0.001456938                                         | 26.7083947                             |
| 383.46875                                 | 0.758037225                      | 0.013044085                                      | 0.004531994                                         | 5.84375                                |
| 3407.683237                               | 0.555112678                      | 0.014161843                                      | 0.001192154                                         | 51.28003314                            |
| 582.3207547                               | 0.844141069                      | 0.009016209                                      | 0.002029883                                         | 6.690026954                            |
| 1236.539481                               | 0.825809394                      | 0.009620635                                      | 0.001123593                                         | 17.42297073                            |
| 682.9310345                               | 0.762567672                      | 0.014063008                                      | 0.002310838                                         | 13.86612576                            |
| 511.291874                                | 0.740786241                      | 0.010415034                                      | 0.003207906                                         | 6.28026534                             |
| 658.9337176                               | 0.787741203                      | 0.012474151                                      | 0.002102812                                         | 8.657060519                            |
| 1506.257621                               | 0.78952336                       | 0.010498659                                      | 0.002702417                                         | 17.56425583                            |
| 3764.117065                               | 0.756297919                      | 0.0096528                                        | 0.001042632                                         | 39.99155202                            |
| 1902.043435                               | 0.65566343                       | 0.013109926                                      | 0.001003928                                         | 26.56071076                            |
| 1405.044619                               | 0.558037349                      | 0.011989274                                      | 0.003068179                                         | 18.27165354                            |
| 158.8469945                               | 0.843317972                      | 0.014183762                                      | 0.011086928                                         | 2.595628415                            |
| 1034.122483                               | 0.767546684                      | 0.009798264                                      | 0.001239542                                         | 11.6795302                             |
| 232.1602564                               | 0.791871713                      | 0.017484385                                      | 0.005667523                                         | 5.455128205                            |
| 2303.262839                               | 0.773537692                      | 0.009905442                                      | 0.001343729                                         | 24.49615851                            |
| 306.3404826                               | 0.83632287                       | 0.012527942                                      | 0.007863879                                         | 4.672922252                            |
| 1403.826393                               | 0.776230731                      | 0.011132584                                      | 0.001051622                                         | 17.37796284                            |
| 2017.011083                               | 0.771710526                      | 0.010702587                                      | 0.002364226                                         | 25.10826939                            |
| 849.7005003                               | 0.831709477                      | 0.010630347                                      | 0.002564003                                         | 9.981895634                            |
| 3211.264472                               | 0.681888545                      | 0.011344135                                      | 0.001426179                                         | 39.97673099                            |
| 3964.864613                               | 0.63787969                       | 0.013261841                                      | 0.001360533                                         | 56.81372549                            |
| 5229.899768                               | 0.609694989                      | 0.010607631                                      | 0.000977063                                         | 59.37091299                            |
| 732.2917965                               | 0.862903226                      | 0.0101761                                        | 0.001546778                                         | 9.799584631                            |
| 716.5578002                               | 0.797672337                      | 0.011471493                                      | 0.003442601                                         | 10.22109989                            |
| 435.5792564                               | 0.837704918                      | 0.013078228                                      | 0.006094487                                         | 6.68297456                             |
| 1130.963121                               | 0.799319728                      | 0.010091042                                      | 0.001833137                                         | 14.22836879                            |
| 1766.502167                               | 0.729796205                      | 0.015573506                                      | 0.000935752                                         | 32.34617236                            |
| 336.8382022                               | 0.882936508                      | 0.009731095                                      | 0.00542985                                          | 4.330337079                            |
| 869.7535211                               | 0.847129008                      | 0.010227075                                      | 0.002491814                                         | 11.61795775                            |
| 1968.328175                               | 0.786891117                      | 0.00913875                                       | 0.00128018                                          | 20.07783341                            |
| 85.5862069                                | 0.8                              | 0.022294887                                      | 0.011454752                                         | 2.586206897                            |
| 2475.86507                                | 0.775877322                      | 0.012249787                                      | 0.001260735                                         | 32.22919042                            |
| 2880.0911208                              | 0.666727538                      | 0.012725096                                      | 0.001108546                                         | 46.45932621                            |
| 574.8221529                               | 0.823907455                      | 0.011329314                                      | 0.006738945                                         | 7.262090484                            |
| 981.4083939                               | 0.798324742                      | 0.011142444                                      | 0.001493381                                         | 13.8054883                             |
| 114.9862069                               | 0.792349727                      | 0.015552913                                      | 0.013214421                                         | 2.255172414                            |
| 69.88372093                               | 0.819047619                      | 0.028393726                                      | 0.035837909                                         | 2.441860465                            |
| 2431.276596                               | 0.709433962                      | 0.009973341                                      | 0.002122201                                         | 28.1248227                             |
| 547.1008403                               | 0.842776204                      | 0.010680037                                      | 0.003267315                                         | 6.354621849                            |
| 632.6484375                               | 0.75146771                       | 0.010718452                                      | 0.001855026                                         | 8.231770833                            |
| 2642.365804                               | 0.717848411                      | 0.010402668                                      | 0.000953434                                         | 30.54223433                            |
| 3640.145776                               | 0.691181536                      | 0.012274399                                      | 0.000696699                                         | 49.25716422                            |
| 143.2511211                               | 0.881422925                      | 0.010798528                                      | 0.009570553                                         | 2.40807149                             |
| 863.778135                                | 0.767269737                      | 0.010707775                                      | 0.003426815                                         | 9.990353698                            |
| 85.12962963                               | 0.87804878                       | 0.02384019                                       | 0.013648237                                         | 5.027777778                            |
| 213.4444444                               | 0.759894459                      | 0.017457562                                      | 0.006557415                                         | 5.027777778                            |
| 497.8811881                               | 0.750929368                      | 0.012427975                                      | 0.002533086                                         | 7.531353135                            |



| wavelet.LLL_gldzm_HighIntensityLargeDistanceEmphasis | wavelet.LLL_gldzm_SmallDistanceEmphasis | wavelet.LLL_gldzm_SumVariance | wavelet.LLL_gldzm_Homogeneity1 | wavelet.LLL_gldzm_Homogeneity2 |
|------------------------------------------------------|-----------------------------------------|-------------------------------|--------------------------------|--------------------------------|
| 6208.626335                                          | 0.953291815                             | 20257.0385                    | 0.122724258                    | 0.063272284                    |
| 7665.053333                                          | 0.948333333                             | 27513.17253                   | 0.181351653                    | 0.112103833                    |
| 2534.736527                                          | 0.93488024                              | 6840.253919                   | 0.144476404                    | 0.071795911                    |
| 6537.756028                                          | 0.934397163                             | 19892.87871                   | 0.119609765                    | 0.058807215                    |
| 2962.496599                                          | 0.93622449                              | 7704.623449                   | 0.120562955                    | 0.056426064                    |
| 3933.468927                                          | 0.916666667                             | 10234.20943                   | 0.110792941                    | 0.047607245                    |
| 1373.773333                                          | 0.863333333                             | 2103.547153                   | 0.178068771                    | 0.098076305                    |
| 5645.917973                                          | 0.918576598                             | 14979.70184                   | 0.103637423                    | 0.043973735                    |
| 5361.750601                                          | 0.959435096                             | 17837.99728                   | 0.117685149                    | 0.054416383                    |
| 7080.271127                                          | 0.968309859                             | 24072.02457                   | 0.156675807                    | 0.080876431                    |
| 3332.693452                                          | 0.931919643                             | 9435.268585                   | 0.125422453                    | 0.057135271                    |
| 8255.779425                                          | 0.93657367                              | 24496.26277                   | 0.139018903                    | 0.070963676                    |
| 4283.926679                                          | 0.955637708                             | 13134.99471                   | 0.133553147                    | 0.062490466                    |
| 4219.894168                                          | 0.946544276                             | 12582.1512                    | 0.120381719                    | 0.054087757                    |
| 4541.331006                                          | 0.924581006                             | 12272.17145                   | 0.123423802                    | 0.057540573                    |
| 8896.567428                                          | 0.95292887                              | 33164.04954                   | 0.29036231                     | 0.052099532                    |
| 5570.478041                                          | 0.858108108                             | 11807.94161                   | 0.104920449                    | 0.044268621                    |
| 5832.308348                                          | 0.977001704                             | 21382.55653                   | 0.133208236                    | 0.069939223                    |
| 5512.715464                                          | 0.905670103                             | 13967.4747                    | 0.106617483                    | 0.0462845                      |
| 6478.082751                                          | 0.974610425                             | 23929.40061                   | 0.192609141                    | 0.122123817                    |
| 6235.100087                                          | 0.933420366                             | 20319.00644                   | 0.182003675                    | 0.115608516                    |
| 4699.313467                                          | 0.92627709                              | 13155.57966                   | 0.144624471                    | 0.071432202                    |
| 6089.684109                                          | 0.955305233                             | 19951.18207                   | 0.13979677                     | 0.075531918                    |
| 6466.25                                              | 0.838235294                             | 12511.22656                   | 0.114180488                    | 0.049797487                    |
| 6138.994312                                          | 0.936860068                             | 18681.62488                   | 0.161531242                    | 0.085769692                    |
| 5362.646718                                          | 0.962355212                             | 17235.4448                    | 0.145251701                    | 0.073066205                    |
| 4538.536418                                          | 0.944686212                             | 14064.263                     | 0.195845777                    | 0.11453182                     |
| 5432.884321                                          | 0.967734226                             | 18038.12494                   | 0.172381644                    | 0.092484436                    |
| 5681.821249                                          | 0.971464465                             | 17989.33556                   | 0.141590046                    | 0.069407333                    |
| 7724.408228                                          | 0.964873418                             | 30905.67889                   | 0.198933872                    | 0.134857702                    |
| 6752.926957                                          | 0.9775                                  | 23989.54587                   | 0.166587583                    | 0.087359116                    |
| 7261.7862                                            | 0.974477822                             | 25305.73956                   | 0.161851226                    | 0.09150399                     |
| 6315.237132                                          | 0.958639706                             | 20380.56211                   | 0.118920042                    | 0.057339279                    |
| 1780                                                 | 0.919642857                             | 3433.892066                   | 0.133071849                    | 0.063909936                    |
| 4563.967626                                          | 0.910971223                             | 11671.11735                   | 0.111678276                    | 0.047552213                    |
| 4790.92696                                           | 0.930967933                             | 13676.67254                   | 0.106808666                    | 0.047479465                    |
| 9043.140078                                          | 0.974464981                             | 31597.86548                   | 0.16266834                     | 0.087090574                    |
| 6287.034274                                          | 0.959475806                             | 21088.17686                   | 0.148982385                    | 0.079670625                    |
| 4941.998473                                          | 0.895801527                             | 11991.96217                   | 0.132590427                    | 0.062804591                    |
| 5765.269099                                          | 0.970068415                             | 20105.51252                   | 0.119685155                    | 0.057642746                    |
| 6581.519569                                          | 0.906800391                             | 19549.99342                   | 0.170649211                    | 0.095406608                    |
| 4357.799748                                          | 0.940491184                             | 12688.97417                   | 0.106803842                    | 0.046778305                    |
| 4286.240646                                          | 0.949926632                             | 12346.1298                    | 0.104737391                    | 0.04650823                     |
| 4684.676923                                          | 0.906804734                             | 11388.08721                   | 0.113861631                    | 0.050885203                    |
| 3771.297443                                          | 0.931359354                             | 9806.220843                   | 0.126041909                    | 0.05780675                     |
| 4355.16206                                           | 0.979271357                             | 16340.72789                   | 0.155797398                    | 0.087567751                    |
| 7403.712736                                          | 0.907034397                             | 20806.22489                   | 0.138099809                    | 0.070527908                    |
| 4148.461378                                          | 0.96085595                              | 13507.30284                   | 0.112752368                    | 0.048559064                    |
| 4102.365385                                          | 0.855769231                             | 5839.863211                   | 0.12338769                     | 0.062404392                    |
| 2996.918848                                          | 0.895942408                             | 6701.261193                   | 0.148375076                    | 0.07426051                     |
| 4596.141889                                          | 0.962335592                             | 15662.90862                   | 0.148979976                    | 0.083423201                    |
| 3381.610556                                          | 0.965763195                             | 11097.63839                   | 0.104210824                    | 0.044046457                    |
| 6488.92894                                           | 0.961064065                             | 22616.58174                   | 0.16746476                     | 0.093341558                    |
| 4062.761161                                          | 0.94140625                              | 12355.94727                   | 0.14443803                     | 0.071483693                    |
| 7410.520022                                          | 0.977216239                             | 28741.74294                   | 0.232272046                    | 0.168388769                    |
| 8926.180593                                          | 0.908018868                             | 25497.89558                   | 0.099718134                    | 0.042722455                    |
| 10791.57592                                          | 0.851739371                             | 21959.19179                   | 0.104311339                    | 0.046668513                    |
| 4379.586207                                          | 0.857758621                             | 7896.389019                   | 0.135126253                    | 0.065753277                    |
| 6649.034826                                          | 0.937810945                             | 23697.27865                   | 0.150631109                    | 0.087305111                    |
| 5920.795389                                          | 0.98054755                              | 20454.4823                    | 0.128489166                    | 0.061405006                    |
| 5852.430962                                          | 0.96054991                              | 19718.43858                   | 0.114069589                    | 0.05574076                     |
| 6097.592566                                          | 0.96397538                              | 20069.80312                   | 0.14364041                     | 0.074720216                    |
| 5338.397828                                          | 0.976307996                             | 19022.77981                   | 0.188254691                    | 0.11466583                     |
| 6036.776903                                          | 0.969488189                             | 22423.48982                   | 0.224668384                    | 0.154414218                    |
| 4301.661202                                          | 0.946721311                             | 13553.91502                   | 0.116049769                    | 0.052700736                    |
| 8901.595638                                          | 0.946518456                             | 29319.42658                   | 0.146984499                    | 0.082114876                    |
| 3388.435897                                          | 0.887019231                             | 7527.13161                    | 0.131163437                    | 0.060739965                    |
| 6068.138698                                          | 0.973311767                             | 21752.27073                   | 0.127163994                    | 0.067365701                    |
| 3997.077748                                          | 0.925603217                             | 10750.18525                   | 0.102624288                    | 0.043933077                    |
| 5860.067265                                          | 0.960121717                             | 18388.38702                   | 0.142835061                    | 0.070550499                    |
| 7503.066496                                          | 0.943094629                             | 23376.99632                   | 0.13017428                     | 0.067822712                    |
| 4825.878594                                          | 0.962460064                             | 16410.17421                   | 0.108183133                    | 0.048934891                    |
| 6070.96765                                           | 0.965096481                             | 21964.88738                   | 0.165881001                    | 0.103065679                    |
| 6543.379552                                          | 0.970938375                             | 24751.75992                   | 0.18769404                     | 0.123232305                    |
| 7264.330892                                          | 0.974539932                             | 27915.26539                   | 0.216810539                    | 0.136441627                    |
| 7874.175493                                          | 0.895638629                             | 19869.48048                   | 0.10038428                     | 0.042062839                    |
| 4461.821549                                          | 0.917508418                             | 11582.82194                   | 0.122653263                    | 0.05645646                     |
| 3610.062622                                          | 0.939823875                             | 10574.45395                   | 0.110044975                    | 0.047697615                    |
| 6766.892908                                          | 0.916489362                             | 18653.79275                   | 0.116175437                    | 0.054592921                    |
| 5260.79923                                           | 0.938974482                             | 15708.60224                   | 0.160583923                    | 0.084492937                    |
| 9026.564045                                          | 0.893820225                             | 22871.57569                   | 0.088133478                    | 0.034952475                    |
| 5910.960387                                          | 0.898327465                             | 14912.23904                   | 0.100454001                    | 0.0427246                      |
| 7841.423305                                          | 0.958693673                             | 23966.89895                   | 0.142430238                    | 0.069744206                    |
| 3501.258621                                          | 0.88362069                              | 5530.734363                   | 0.125720164                    | 0.062301197                    |
| 5526.881414                                          | 0.977194983                             | 19088.00452                   | 0.128256691                    | 0.063655916                    |
| 6041.655985                                          | 0.910024651                             | 17542.36616                   | 0.184561626                    | 0.101631104                    |
| 4680.75819                                           | 0.959048362                             | 15979.27128                   | 0.109787362                    | 0.050845271                    |
| 7005.799031                                          | 0.911622276                             | 18638.09318                   | 0.122360336                    | 0.055700158                    |
| 5180.406897                                          | 0.912068966                             | 15294.02195                   | 0.147425905                    | 0.083528611                    |
| 1671.546512                                          | 0.921511628                             | 3334.057382                   | 0.116352249                    | 0.052429955                    |
| 6627.82305                                           | 0.944148936                             | 21659.86547                   | 0.158336104                    | 0.09390091                     |
| 6667.788235                                          | 0.968487395                             | 23232.90304                   | 0.107689675                    | 0.047070717                    |
| 6894.128906                                          | 0.926757813                             | 22111.80087                   | 0.155096908                    | 0.078606344                    |
| 6752.24421                                           | 0.960405313                             | 23324.07644                   | 0.156375749                    | 0.089863007                    |
| 6852.949664                                          | 0.963369051                             | 24167.52389                   | 0.165816352                    | 0.096072221                    |
| 10724.27354                                          | 0.825112108                             | 18676.4481                    | 0.091408064                    | 0.037343789                    |
| 3870.071811                                          | 0.971061093                             | 12989.16642                   | 0.136565285                    | 0.068205594                    |
| 3756.046296                                          | 0.909722222                             | 7906.777736                   | 0.103962237                    | 0.04450104                     |
| 2512.020833                                          | 0.885416667                             | 5167.666098                   | 0.140507252                    | 0.06917384                     |
| 9988.914191                                          | 0.925742574                             | 30053.1056                    | 0.152838627                    | 0.083022974                    |









| wavelet.LLL_firstorder_MeanAbsoluteDeviation | wavelet.LLL_firstorder_Energy | wavelet.LLL_firstorder_RobustMeanAbsoluteDeviation | wavelet.LLL_firstorder_Median | wavelet.LLL_firstorder_TotalEnergy | wavelet.LLL_firstorder_Maximum |
|----------------------------------------------|-------------------------------|----------------------------------------------------|-------------------------------|------------------------------------|--------------------------------|
| 684.1825744                                  | 962759742.2                   | 577.6438332                                        | -893.2677378                  | 25994513039                        | 573.2431394                    |
| 639.0185453                                  | 1920654389                    | 489.1607261                                        | -275.7662222                  | 51857668494                        | 833.792456                     |
| 365.0176129                                  | 468414594                     | 269.5435827                                        | -893.8981643                  | 12647194039                        | 18.19593314                    |
| 775.1923617                                  | 4610993762                    | 642.3836707                                        | -967.9478668                  | 1.24E+11                           | 1506.515688                    |
| 450.1768032                                  | 797845122.1                   | 320.307411                                         | -1528.077242                  | 21541818296                        | 208.9718643                    |
| 507.4573447                                  | 988175191.7                   | 383.5053739                                        | -1172.611797                  | 26680730175                        | 190.0529202                    |
| 257.9421442                                  | 1251844438                    | 184.80089                                          | -1959.059275                  | 33799799825                        | -746.4661758                   |
| 608.2790874                                  | 1864100742                    | 472.844759                                         | -1239.335201                  | 50330720041                        | 418.288045                     |
| 636.1598508                                  | 2754720277                    | 506.7494791                                        | -792.9845591                  | 74377447475                        | 1107.874104                    |
| 475.8723848                                  | 2053379292                    | 344.0040904                                        | -485.1465485                  | 55441240893                        | 924.1726615                    |
| 459.5921792                                  | 1459965825                    | 351.9344384                                        | -1275.167007                  | 39419077273                        | -43.14495822                   |
| 578.3116778                                  | 1132582938                    | 433.3753236                                        | -443.4374322                  | 30579739335                        | 1358.514257                    |
| 475.303573                                   | 2754929437                    | 358.9718667                                        | -1013.375165                  | 74383094805                        | 200.5957416                    |
| 523.0578669                                  | 1472651316                    | 400.8489203                                        | -987.0076709                  | 39761585544                        | 638.1836511                    |
| 533.0490319                                  | 1732256069                    | 414.9075274                                        | -1326.876889                  | 46770913867                        | 583.9942857                    |
| 504.4661932                                  | 3633438881                    | 297.4604079                                        | 43.35449981                   | 98102849796                        | 717.0724052                    |
| 572.9682541                                  | 1322396500                    | 440.3685236                                        | -1288.757231                  | 35704705501                        | 279.6531341                    |
| 677.6269809                                  | 2838689324                    | 561.266575                                         | -664.378526                   | 76644611740                        | 519.1918426                    |
| 539.5434966                                  | 1205018322                    | 396.1257307                                        | -1384.834955                  | 32535494699                        | 309.5985989                    |
| 550.5715465                                  | 2031771234                    | 425.4565918                                        | -453.2529493                  | 54857823305                        | 792.9916929                    |
| 484.4936559                                  | 2735077563                    | 379.1341095                                        | -278.8807217                  | 73847094198                        | 308.1937966                    |
| 427.6055339                                  | 1773252469                    | 316.6447941                                        | -837.9900202                  | 47877816663                        | 241.2241601                    |
| 544.1514969                                  | 2189059270                    | 433.5352648                                        | -529.8816124                  | 59104600278                        | 286.3146623                    |
| 614.1081676                                  | 1323965315                    | 468.0645594                                        | -1594.426965                  | 35747063499                        | 220.2594575                    |
| 396.4729924                                  | 634575133.8                   | 291.1859124                                        | -459.400887                   | 17133528612                        | 228.0832472                    |
| 517.3574814                                  | 680529512.2                   | 380.8424741                                        | -681.7751991                  | 18374296829                        | 327.3697332                    |
| 398.3849464                                  | 1156631871                    | 291.1205995                                        | -286.6729328                  | 31229060527                        | 1267.259761                    |
| 364.5778645                                  | 980842284                     | 249.1187459                                        | -654.6392616                  | 26482741668                        | 427.4731303                    |
| 567.3680724                                  | 2758191815                    | 419.8748993                                        | -1060.663653                  | 74471179001                        | 379.3013862                    |
| 627.4862549                                  | 2059710471                    | 468.2861891                                        | -142.605989                   | 55612182706                        | 345.9919407                    |
| 356.3691378                                  | 1233957042                    | 236.9965401                                        | -366.7870419                  | 33316840126                        | 635.6722913                    |
| 561.7718362                                  | 5229012822                    | 442.8448716                                        | -563.2847314                  | 1.41E+11                           | 620.3516633                    |
| 779.6934333                                  | 3182355988                    | 643.5116851                                        | -804.7470258                  | 85923611663                        | 1236.810769                    |
| 283.8506167                                  | 335133486.1                   | 180.506923                                         | -1811.381805                  | 9048604124                         | -590.8584135                   |
| 517.1206427                                  | 653039733.6                   | 386.7924943                                        | -1328.74707                   | 17632072806                        | 96.77677844                    |
| 662.0646338                                  | 3927344014                    | 530.5682525                                        | -1267.735958                  | 1.06E+11                           | 298.7550356                    |
| 425.5584361                                  | 2094301466                    | 296.0271691                                        | -574.5495956                  | 56546139595                        | 667.6053384                    |
| 585.0408428                                  | 2971775963                    | 458.2340997                                        | -555.1076743                  | 80237951013                        | 1495.756518                    |
| 552.5308453                                  | 1730941024                    | 413.7533835                                        | -1321.711467                  | 46735407645                        | 457.3449736                    |
| 726.6367796                                  | 1420260176                    | 598.4490589                                        | -726.699181                   | 38347024741                        | 1045.224479                    |
| 580.4992236                                  | 1099630671                    | 457.2594813                                        | -421.3414324                  | 29690028115                        | 710.3301728                    |
| 600.5402104                                  | 1816712888                    | 469.0814386                                        | -1348.54212                   | 49051247966                        | 223.260253                     |
| 648.4074494                                  | 3318980783                    | 517.8054645                                        | -1340.802658                  | 89612481148                        | 304.0001651                    |
| 575.338014                                   | 2080754530                    | 445.2510087                                        | -1361.863787                  | 56180372321                        | 293.6305406                    |
| 496.1529481                                  | 3583446676                    | 385.5440932                                        | -1304.930922                  | 96753060259                        | 126.5477519                    |
| 483.333255                                   | 1124193011                    | 383.3848331                                        | -306.3604064                  | 30353211287                        | 321.6517788                    |
| 623.3664905                                  | 4288863495                    | 493.0922153                                        | -666.4193146                  | 1.16E+11                           | 1394.342619                    |
| 516.9864959                                  | 905215993.5                   | 397.5279215                                        | -1167.077991                  | 24440831825                        | 355.0016549                    |
| 407.3675129                                  | 466380796.5                   | 271.460229                                         | -1960.023103                  | 12592281507                        | -90.60895925                   |
| 427.4903608                                  | 1316996360                    | 327.2331536                                        | -1634.837946                  | 35558901715                        | -139.4538432                   |
| 611.5049774                                  | 3501398542                    | 499.6443784                                        | -617.0944031                  | 94537760626                        | 480.3634893                    |
| 611.1406689                                  | 1571790198                    | 490.0943614                                        | -1278.770709                  | 42438335349                        | 278.9274496                    |
| 621.3990841                                  | 3844737824                    | 475.6124705                                        | -597.7707541                  | 1.04E+11                           | 1275.697587                    |
| 518.589798                                   | 539068321.7                   | 396.4252444                                        | -758.4936913                  | 14554844687                        | 829.0111807                    |
| 603.3354891                                  | 4454187268                    | 414.5626294                                        | 24.38332333                   | 1.20E+11                           | 816.9911666                    |
| 763.6142164                                  | 2098441539                    | 606.5288105                                        | -1327.178738                  | 56657921551                        | 310.2607143                    |
| 694.1566552                                  | 3978557292                    | 558.5927426                                        | -1156.625646                  | 1.07E+11                           | 703.6700095                    |
| 433.5194546                                  | 5044111977                    | 317.5163785                                        | -1965.000087                  | 1.36E+11                           | -248.9670373                   |
| 740.3459294                                  | 903335077.8                   | 618.2056639                                        | -514.5050419                  | 24390047101                        | 875.5702742                    |
| 502.6132989                                  | 587596665                     | 374.3336713                                        | -510.8639665                  | 15865109955                        | 1511.990353                    |
| 665.1223692                                  | 2375523726                    | 552.2480125                                        | -717.3329901                  | 64139140610                        | 425.2444265                    |
| 645.2610187                                  | 7125956195                    | 506.9873639                                        | -761.8686053                  | 1.92E+11                           | 592.9520904                    |
| 513.4005464                                  | 1464381765                    | 392.2225543                                        | -101.6195244                  | 39538307654                        | 1251.561191                    |
| 526.2631724                                  | 1530441150                    | 343.2788093                                        | -68.99249341                  | 41321911047                        | 1774.89784                     |
| 629.7244482                                  | 261550865.6                   | 514.3097584                                        | -820.1718736                  | 7061873372                         | 614.1342505                    |
| 803.3233601                                  | 2560319828                    | 682.056759                                         | -787.4923297                  | 69128635353                        | 615.4200916                    |
| 367.8763841                                  | 899206065.6                   | 260.830676                                         | -1497.888664                  | 24278563772                        | -232.7607673                   |
| 727.6203243                                  | 4243766365                    | 605.1372999                                        | -692.4989466                  | 1.15E+11                           | 462.7604589                    |
| 573.0328369                                  | 665304769.6                   | 437.2751289                                        | -1147.579886                  | 17963228779                        | 404.3269771                    |
| 550.2728917                                  | 2203166323                    | 422.5023153                                        | -840.5841527                  | 59485490709                        | 681.0368835                    |
| 672.1548638                                  | 2795412259                    | 542.9066809                                        | -385.070362                   | 75476131000                        | 652.5058011                    |
| 648.3129978                                  | 1537212557                    | 522.3032961                                        | -932.2914851                  | 41504739034                        | 436.9248749                    |
| 624.0717877                                  | 4385124057                    | 499.2779455                                        | -316.9518702                  | 1.18E+11                           | 866.2021703                    |
| 570.7819932                                  | 4569642654                    | 425.716975                                         | -154.1082633                  | 1.23E+11                           | 391.6198378                    |
| 585.9279571                                  | 5405520018                    | 427.1317654                                        | -10.41648437                  | 1.46E+11                           | 1487.045046                    |
| 632.488074                                   | 2155804852                    | 490.7533844                                        | -1241.96117                   | 58206731013                        | 494.214801                     |
| 547.7246359                                  | 1853417963                    | 428.3947448                                        | -1139.45704                   | 50042285008                        | 257.1178749                    |
| 497.8812172                                  | 707653836.1                   | 383.4224847                                        | -968.1062197                  | 19106653574                        | 324.3594174                    |
| 629.7177782                                  | 2643932585                    | 496.9178381                                        | -930.3032482                  | 71386179787                        | 272.5712739                    |
| 372.2893134                                  | 2225104108                    | 271.4816386                                        | -725.8186092                  | 60077810915                        | 444.208221                     |
| 798.7519727                                  | 825616405.8                   | 630.8163363                                        | -949.3476209                  | 22291642957                        | 1249.04289                     |
| 631.750972                                   | 2590156398                    | 484.4923736                                        | -1274.984781                  | 69934222748                        | 533.3108541                    |
| 659.0458559                                  | 3462612132                    | 507.0188258                                        | -827.1571266                  | 93589053259                        | 1040.138104                    |
| 412.040663                                   | 354776209                     | 293.0505402                                        | -1647.94299                   | 5978957642                         | 10.17873356                    |
| 549.8953475                                  | 2375633469                    | 435.3527279                                        | -439.6614334                  | 64142103676                        | 663.4009949                    |
| 453.3109576                                  | 3173926654                    | 329.8141089                                        | -452.7588419                  | 85696019669                        | 957.2292873                    |
| 604.9481322                                  | 864526574.3                   | 488.3979062                                        | -779.5219157                  | 23342217505                        | 375.0105076                    |
| 518.0426493                                  | 2536016520                    | 379.2580025                                        | -1128.818268                  | 68472446033                        | 481.8623221                    |
| 711.5451426                                  | 247751994.3                   | 578.6642836                                        | -588.0345879                  | 6689303879                         | 1056.811105                    |
| 360.2113673                                  | 266197866.8                   | 261.104251                                         | -1658.997234                  | 7187342403                         | -279.8763012                   |
| 697.4848188                                  | 4010887288                    | 557.2900318                                        | -320.9963446                  | 1.08E+11                           | 1270.856853                    |
| 646.5835104                                  | 668873001.6                   | 501.5595509                                        | -525.1286694                  | 18059571044                        | 881.8147254                    |
| 608.650019                                   | 1073083425                    | 471.1416374                                        | -674.4349409                  | 28973252476                        | 502.0701377                    |
| 599.1308459                                  | 3488389286                    | 463.4755087                                        | -471.0950481                  | 94186510731                        | 1288.572223                    |
| 548.6160385                                  | 3464813347                    | 420.8212139                                        | -208.5625537                  | 93549960356                        | 1199.689283                    |
| 790.212316                                   | 417680153.2                   | 633.9073452                                        | -1074.906222                  | 11277364136                        | 881.5170451                    |
| 690.1609855                                  | 2479025346                    | 540.6872298                                        | -1396.83928                   | 66933684355                        | 1069.416113                    |
| 547.8035059                                  | 243946678.6                   | 410.7384904                                        | -1477.957992                  | 6586560323                         | 182.4924582                    |
| 386.869174                                   | 997132741.1                   | 285.910453                                         | -1634.199391                  | 26922584009                        | -204.6276643                   |
| 560.9940264                                  | 430669139.9                   | 400.3822007                                        | -7.684536865                  | 11628066779                        | 814.6874828                    |

| wavelet.LLL_firstorder_RootMeanSquared | wavelet.LLL_firstorder_90Percentile | wavelet.LLL_firstorder_Minimum | wavelet.LLL_firstorder_Entropy | wavelet.LLL_firstorder_StandardDeviation | wavelet.LLL_firstorder_Range |
|----------------------------------------|-------------------------------------|--------------------------------|--------------------------------|------------------------------------------|------------------------------|
| 1167.768108                            | 91.33019519                         | -2549.576794                   | 6.459994973                    | 767.2837201                              | 3122.819933                  |
| 961.6263679                            | 108.9317329                         | -2605.628895                   | 6.337788954                    | 747.9499778                              | 3439.421351                  |
| 1038.891861                            | -416.3875382                        | -1948.3799                     | 5.969281412                    | 437.9472443                              | 1966.575833                  |
| 1322.8389                              | 95.41445132                         | -2648.199052                   | 6.835340284                    | 875.6502815                              | 4154.71474                   |
| 1490.774903                            | -547.7883001                        | -2338.602537                   | 6.099156949                    | 550.9260481                              | 2547.574401                  |
| 1239.685401                            | -172.1788572                        | -2207.991293                   | 6.395221066                    | 601.8138706                              | 2398.044213                  |
| 1927.348418                            | -1475.860015                        | -2430.332551                   | 5.405839177                    | 320.8421933                              | 1683.866375                  |
| 1363.957471                            | -138.2357908                        | -2534.717583                   | 6.670100091                    | 711.8753314                              | 2953.005628                  |
| 1151.095903                            | 18.50383958                         | -2470.454351                   | 6.687656246                    | 735.1039101                              | 3578.328455                  |
| 814.1302322                            | 132.596064                          | -2479.0432                     | 6.49409502                     | 583.9932607                              | 3403.215862                  |
| 1328.67447                             | -447.4885823                        | -2343.443604                   | 6.314947037                    | 541.8089326                              | 2300.298646                  |
| 874.2002084                            | 222.6932837                         | -2425.798605                   | 6.665188607                    | 690.4405688                              | 3784.312861                  |
| 1152.526351                            | -207.7938969                        | -2388.267454                   | 6.43931105                     | 566.2918028                              | 2588.863195                  |
| 1147.701801                            | -104.2450019                        | -2280.664536                   | 6.505207169                    | 617.3483751                              | 2918.848187                  |
| 1378.944723                            | -339.749558                         | -2548.284236                   | 6.472983527                    | 622.4832828                              | 3132.278522                  |
| 723.2031019                            | 157.9819339                         | -2598.134965                   | 5.513887002                    | 663.3720157                              | 3315.20737                   |
| 1376.426845                            | -183.1270863                        | -2382.429352                   | 6.527831768                    | 715.1388181                              | 2662.082486                  |
| 1103.302645                            | 107.1979502                         | -2527.862024                   | 6.589254873                    | 764.4126752                              | 3047.053866                  |
| 1438.915639                            | -317.8817897                        | -2605.158101                   | 6.506208677                    | 650.8275216                              | 2914.756699                  |
| 851.6886294                            | 161.3283635                         | -2495.031868                   | 6.492485654                    | 647.3601968                              | 3288.023561                  |
| 723.5744768                            | 126.6127455                         | -2201.543967                   | 5.980801035                    | 566.7602266                              | 2509.737764                  |
| 1015.362368                            | -203.5903741                        | -2299.671606                   | 6.325446613                    | 517.0654461                              | 2540.895766                  |
| 895.2986098                            | 93.82636431                         | -2350.614597                   | 6.333655556                    | 630.8849842                              | 2636.929256                  |
| 1659.074031                            | -380.4268951                        | -2757.263997                   | 6.587220329                    | 728.3379777                              | 2977.523454                  |
| 725.9860598                            | 34.08320833                         | -2240.300126                   | 6.103553013                    | 482.5589268                              | 2468.383373                  |
| 990.2474818                            | 30.81836012                         | -2368.50662                    | 6.476718521                    | 620.401036                               | 2695.876353                  |
| 577.6746348                            | 253.8019222                         | -1799.2746                     | 6.24601065                     | 486.2536806                              | 3066.534361                  |
| 827.3256606                            | -73.55640437                        | -2343.084256                   | 6.171454105                    | 460.7974032                              | 2770.557386                  |
| 1250.085961                            | -66.52476808                        | -2609.663947                   | 6.715629513                    | 686.4708554                              | 2988.965333                  |
| 900.1508901                            | 141.5373938                         | -2643.732116                   | 6.136305998                    | 743.6382956                              | 2989.724056                  |
| 623.0239707                            | 147.5007947                         | -2327.259708                   | 6.161641129                    | 460.9428362                              | 2962.931999                  |
| 939.0365718                            | 87.05434016                         | -2663.921574                   | 6.476161585                    | 656.151196                               | 3284.273238                  |
| 1251.13937                             | 158.57372                           | -2528.882533                   | 6.856517033                    | 879.7203582                              | 3765.693302                  |
| 1795.114862                            | -1345.47139                         | -2411.858096                   | 5.277235214                    | 372.2747783                              | 1820.999683                  |
| 1402.49319                             | -377.8559712                        | -2499.32331                    | 6.334917768                    | 616.6210603                              | 2596.100088                  |
| 1394.356378                            | -36.27447486                        | -2492.077944                   | 6.697898067                    | 763.995915                               | 2790.832979                  |
| 852.7531936                            | -17.2920843                         | -2889.277707                   | 6.332785487                    | 533.1807732                              | 3556.883046                  |
| 941.2966297                            | 129.5443549                         | -2416.963341                   | 6.571762428                    | 685.2604932                              | 3912.719858                  |
| 1439.785839                            | -346.588028                         | -2532.300375                   | 6.604954482                    | 660.0836649                              | 2989.645349                  |
| 1163.5799                              | 129.3971336                         | -2458.837094                   | 6.722252324                    | 822.8475563                              | 3504.061574                  |
| 863.7233899                            | 248.1343778                         | -2229.058402                   | 6.540860159                    | 673.4699997                              | 2939.388575                  |
| 1380.691649                            | -81.69643745                        | -2439.68512                    | 5.516557196                    | 699.5839717                              | 2662.945373                  |
| 1421.72563                             | -50.79849278                        | -2438.948905                   | 6.632526886                    | 748.5670708                              | 2742.94907                   |
| 1424.782236                            | -223.705469                         | -2429.242777                   | 6.568970824                    | 675.8359711                              | 2722.873318                  |
| 1381.346651                            | -417.5537101                        | -2404.418605                   | 6.425452281                    | 581.0623923                              | 2530.966357                  |
| 710.3344                               | 186.6077393                         | -1978.380349                   | 6.113044361                    | 561.1475751                              | 2300.032128                  |
| 1002.676154                            | 205.2972043                         | -2433.196707                   | 6.72511316                     | 725.2518341                              | 3827.539325                  |
| 1246.068255                            | -238.3139177                        | -2404.849855                   | 6.38876967                     | 607.5286255                              | 2759.851501                  |
| 1865.597412                            | -995.5535656                        | -2531.80126                    | 5.550105711                    | 511.7085452                              | 2441.192301                  |
| 1627.848909                            | -812.1415538                        | -2497.9653                     | 6.099671722                    | 504.8403847                              | 2358.511457                  |
| 1011.239197                            | 107.0130641                         | -2243.397594                   | 6.455167707                    | 697.6989622                              | 2723.761083                  |
| 1378.619869                            | -175.6228533                        | -2332.0414                     | 6.552686474                    | 700.563662                               | 2610.968849                  |
| 1003.101422                            | 200.7948738                         | -2485.843187                   | 6.740597904                    | 739.2298354                              | 3761.540774                  |
| 955.054522                             | 17.09174473                         | -2036.618004                   | 6.408143503                    | 613.3072149                              | 2865.629185                  |
| 826.3433698                            | 166.6505542                         | -2500.639217                   | 5.778654117                    | 737.1852541                              | 3317.630384                  |
| 1545.090776                            | -37.55047854                        | -3092.132601                   | 6.900195181                    | 884.4592118                              | 3402.393315                  |
| 1346.925243                            | 59.31068335                         | -2787.795087                   | 6.802189157                    | 796.4111579                              | 3491.465097                  |
| 1975.118228                            | -1161.008815                        | -2941.061442                   | 6.282135659                    | 527.4217633                              | 2692.094404                  |
| 1053.445895                            | 308.6413099                         | -2423.077531                   | 6.532058591                    | 830.5255328                              | 3298.647805                  |
| 816.6795991                            | 119.0522917                         | -2284.254239                   | 6.436282653                    | 608.0672731                              | 3796.244592                  |
| 1058.800671                            | 223.8375258                         | -2392.400487                   | 6.592610426                    | 751.0340843                              | 2817.644914                  |
| 1140.540103                            | 99.08260341                         | -2610.845714                   | 6.766781719                    | 750.3133095                              | 3203.979805                  |
| 688.4111826                            | 249.8624057                         | -2093.87042                    | 6.222006845                    | 601.178055                               | 3345.431611                  |
| 748.5959395                            | 151.8381042                         | -2198.160263                   | 6.040099373                    | 665.5068863                              | 3973.058103                  |
| 1097.863165                            | 79.73937027                         | -2078.693006                   | 6.252434687                    | 716.3289642                              | 2692.827256                  |
| 1283.989233                            | 72.11223672                         | -3005.891513                   | 6.660959968                    | 888.5378947                              | 3621.311605                  |
| 1510.711388                            | -778.7667881                        | -2405.819575                   | 6.008509695                    | 454.9974861                              | 2173.058807                  |
| 1152.137772                            | 184.9813652                         | -2560.99                       | 6.633509823                    | 821.7790281                              | 3023.750459                  |
| 1221.35774                             | 26.5903921                          | -2107.153412                   | 6.455326746                    | 679.3592114                              | 2511.480389                  |
| 1046.688872                            | 133.2195077                         | -2523.269526                   | 6.595831739                    | 648.5787848                              | 3204.306409                  |
| 958.9283114                            | 278.8114122                         | -2414.949095                   | 6.580006186                    | 771.0024296                              | 3067.454896                  |
| 1166.863327                            | 164.2829459                         | -2330.099205                   | 6.627758504                    | 747.2589678                              | 2767.02408                   |
| 921.1485857                            | 120.3420933                         | -2416.313361                   | 6.272385898                    | 716.9778659                              | 3282.515531                  |
| 824.8705074                            | 139.5821025                         | -2401.017193                   | 6.029245342                    | 681.5345952                              | 2792.637031                  |
| 767.3568943                            | 364.3154136                         | -2353.470821                   | 6.475166207                    | 703.5275539                              | 3840.515867                  |
| 1389.865022                            | -76.03600784                        | -2790.962956                   | 6.735786518                    | 742.9785499                              | 3285.177757                  |
| 1288.131194                            | -243.7269321                        | -2330.049121                   | 6.549502377                    | 638.2453189                              | 2587.166996                  |
| 1077.073932                            | -79.55374048                        | -2058.015979                   | 6.370001018                    | 586.0654026                              | 2382.375396                  |
| 1224.266309                            | -16.78753653                        | -2569.826578                   | 6.685564818                    | 731.6817779                              | 2842.397852                  |
| 884.2146779                            | -235.780386                         | -2304.134928                   | 6.150661611                    | 452.3864901                              | 2748.343149                  |
| 1279.893663                            | 332.2707953                         | -2507.247383                   | 6.842688823                    | 926.9851119                              | 3756.290273                  |
| 1389.788153                            | -69.8486129                         | -2553.65874                    | 6.748211392                    | 746.4500646                              | 3086.965954                  |
| 1114.225101                            | 292.6307761                         | -2774.771875                   | 6.876471624                    | 778.6003543                              | 3814.909979                  |
| 1564.203464                            | -685.8047576                        | -2241.266408                   | 5.685890884                    | 505.2464282                              | 2251.445142                  |
| 837.000703                             | 206.2799828                         | -2231.31052                    | 6.416115962                    | 637.3743476                              | 2894.711515                  |
| 761.3190965                            | 145.8915097                         | -2170.134662                   | 6.441976312                    | 553.825013                               | 3127.363949                  |
| 1054.142626                            | 164.4202442                         | -2245.402924                   | 6.519835502                    | 696.4298888                              | 2620.413432                  |
| 1278.292323                            | -259.1175842                        | -2700.412331                   | 6.6349462                      | 630.0321571                              | 3182.274653                  |
| 1163.544599                            | -56.05176004                        | -2240.237954                   | 6.015608243                    | 804.459325                               | 3297.049059                  |
| 1592.236722                            | -805.9837533                        | -2092.252064                   | 5.300172547                    | 436.9158916                              | 1812.375763                  |
| 1004.503981                            | 155.1351102                         | -2395.613422                   | 6.588699002                    | 795.7642361                              | 3666.470275                  |
| 973.3510074                            | 316.2075915                         | -2397.91227                    | 6.686941476                    | 758.6994872                              | 3279.726995                  |
| 1024.687163                            | 217.7071878                         | -2506.806515                   | 6.668601906                    | 713.5152095                              | 3008.876653                  |
| 923.5295967                            | 130.026468                          | -2461.305425                   | 6.603411147                    | 703.795164                               | 3749.877648                  |
| 772.5051904                            | 197.8331437                         | -2343.829816                   | 6.321260315                    | 644.9412057                              | 3543.519098                  |
| 1284.877308                            | 317.1127207                         | -2377.863292                   | 6.666056609                    | 899.1237504                              | 3259.380337                  |
| 1427.820773                            | 18.70490575                         | -2452.295744                   | 6.704878405                    | 803.2783868                              | 3521.711856                  |
| 1408.299091                            | -133.4440912                        | -2162.987074                   | 5.573799344                    | 638.9709394                              | 2345.479532                  |
| 1622.022534                            | -856.3254354                        | -2357.986903                   | 5.98092113                     | 467.5846311                              | 2153.359238                  |
| 730.5250441                            | 434.6740557                         | -2349.960045                   | 6.392943755                    | 682.8617729                              | 3164.647528                  |

| wavelet.LLL_firorder_Variance | wavelet.LLL_firorder_10Percentile | wavelet.LLL_firorder_Kurtosis | wavelet.LLL_firorder_Mean | wavelet.LLL_glrIm_ShortRunLowGrayLevelEmphasis | wavelet.LLL_glrIm_GrayLevelVariance |
|-------------------------------|-----------------------------------|-------------------------------|---------------------------|------------------------------------------------|-------------------------------------|
| 588724.3072                   | -1908.057786                      | 1.610829558                   | -880.3170152              | 0.002034897                                    | 938.0971784                         |
| 559429.1693                   | -1810.837106                      | 2.480702774                   | -604.3973048              | 0.001170548                                    | 900.7420421                         |
| 191797.7888                   | -1576.403098                      | 2.293701416                   | -942.0713937              | 0.010154021                                    | 307.728592                          |
| 766763.4156                   | -2224.073832                      | 1.729443412                   | -991.5338322              | 0.002367394                                    | 1221.739223                         |
| 303519.5104                   | -2017.62008                       | 2.953652553                   | -1385.24016               | 0.008098762                                    | 486.0618605                         |
| 362179.9348                   | -1830.400643                      | 2.14429558                    | -1083.808082              | 0.003787825                                    | 576.1971626                         |
| 102939.713                    | -2257.817065                      | 3.601490841                   | -1900.45579               | 0.009618613                                    | 166.7784626                         |
| 506766.4875                   | -2067.121146                      | 1.990795902                   | -1163.448965              | 0.002445088                                    | 807.8308681                         |
| 540377.7587                   | -1939.340155                      | 1.923008777                   | -885.8013431              | 0.001710289                                    | 863.9332144                         |
| 341048.1285                   | -1414.01725                       | 2.640180093                   | -567.2388443              | 0.000616386                                    | 546.2512505                         |
| 293556.9194                   | -1891.660676                      | 2.06748934                    | -1213.185446              | 0.003326761                                    | 469.3652761                         |
| 476708.1791                   | -1513.81392                       | 2.389466737                   | -536.2068866              | 0.001186087                                    | 766.0854531                         |
| 320686.406                    | -1763.311816                      | 2.116861401                   | -1003.808041              | 0.001188856                                    | 512.9967256                         |
| 381119.0162                   | -1783.450889                      | 2.043985591                   | -967.5228205              | 0.002095638                                    | 607.6609504                         |
| 387485.4373                   | -2001.858488                      | 2.03459615                    | -1230.448338              | 0.002514057                                    | 619.9079576                         |
| 440062.4312                   | -1430.213714                      | 4.792050339                   | -288.0282892              | 0.000587061                                    | 734.2307111                         |
| 455812.4238                   | -2024.864886                      | 2.085691776                   | -1199.474233              | 0.003934624                                    | 726.5322524                         |
| 584326.738                    | -1888.573389                      | 1.7520449                     | -795.5815404              | 0.001258291                                    | 931.85281                           |
| 423576.4628                   | -2083.92479                       | 2.378431442                   | -1283.316701              | 0.003075868                                    | 677.6742624                         |
| 419075.2243                   | -1501.11105                       | 2.249270363                   | -553.4422256              | 0.000725226                                    | 669.0370153                         |
| 321217.1545                   | -1305.918844                      | 2.488151424                   | -449.8253762              | 0.000680613                                    | 514.0041828                         |
| 267356.6756                   | -1602.382062                      | 2.335921414                   | -873.8444154              | 0.001455932                                    | 427.6091829                         |
| 398015.8632                   | -1562.179072                      | 2.146140565                   | -635.2509248              | 0.001103554                                    | 634.3265765                         |
| 530476.2097                   | -2366.292877                      | 2.17463329                    | -1490.654364              | 0.00421529                                     | 846.9799178                         |
| 232863.1178                   | -1235.656841                      | 2.848667776                   | -542.3952813              | 0.001238641                                    | 372.232816                          |
| 384897.4455                   | -1620.804463                      | 2.406245357                   | -771.8112656              | 0.003722772                                    | 614.2599663                         |
| 236442.6419                   | -980.9183389                      | 2.680631724                   | -311.8739197              | 0.000933833                                    | 380.9987148                         |
| 212334.2468                   | -1284.1599                        | 3.01311728                    | -687.1197145              | 0.001042618                                    | 340.7493037                         |
| 471242.2354                   | -1958.646416                      | 2.21187613                    | -1044.735696              | 0.00200732                                     | 753.3185188                         |
| 552997.9147                   | -1763.865584                      | 2.781908612                   | -507.2215593              | 0.001076597                                    | 898.6399987                         |
| 212468.2982                   | -1047.909911                      | 3.473110947                   | -419.1545895              | 0.000559003                                    | 341.4001902                         |
| 430534.392                    | -1620.480259                      | 2.223771613                   | -671.7553805              | 0.000490961                                    | 686.5713947                         |
| 773907.9087                   | -2105.720614                      | 1.736473319                   | -889.6301561              | 0.002885477                                    | 1234.929373                         |
| 138588.5106                   | -2151.956998                      | 3.772971228                   | -1756.08908               | 0.014871                                       | 224.207819                          |
| 380221.5319                   | -2044.744336                      | 2.163579908                   | -1259.668852              | 0.004569405                                    | 609.0474544                         |
| 583689.7581                   | -2129.164944                      | 1.817784056                   | -1166.421858              | 0.003839669                                    | 929.2777065                         |
| 284281.7369                   | -1386.902909                      | 3.49408931                    | -665.5120377              | 0.000545971                                    | 456.3694732                         |
| 469581.9435                   | -1619.046379                      | 2.224108465                   | -645.335108               | 0.000797274                                    | 750.7718206                         |
| 435710.4447                   | -2133.076553                      | 2.321817521                   | -1279.559619              | 0.004706422                                    | 697.4569066                         |
| 677078.1009                   | -2006.764961                      | 1.744106632                   | -822.7029133              | 0.002414722                                    | 1082.064243                         |
| 453561.8405                   | -1516.905102                      | 2.075004864                   | -540.7922463              | 0.001541676                                    | 742.7209649                         |
| 489417.7335                   | -2006.279287                      | 2.001008275                   | -1190.332599              | 0.002847983                                    | 779.3611491                         |
| 560352.6595                   | -2118.852706                      | 1.867599114                   | -1208.698104              | 0.00365454                                     | 893.8759084                         |
| 456754.2599                   | -2086.294785                      | 2.055177663                   | -1254.292693              | 0.00343371                                     | 729.0360722                         |
| 337633.5038                   | -2011.27522                       | 2.00606311                    | -1253.189957              | 0.001910215                                    | 538.6012988                         |
| 314886.601                    | -1290.453169                      | 2.146053768                   | -435.5322708              | 0.001113596                                    | 503.7800826                         |
| 525990.2228                   | -1695.630307                      | 2.031478448                   | -692.364966               | 0.000738554                                    | 839.7467296                         |
| 369091.0308                   | -1810.236256                      | 2.119732227                   | -1087.931553              | 0.002821389                                    | 590.8591638                         |
| 261845.6353                   | -2332.306128                      | 3.802273406                   | -1794.047957              | 0.018086005                                    | 420.6811758                         |
| 254863.8141                   | -2144.305295                      | 2.328809455                   | -1547.587884              | 0.004866107                                    | 408.3795171                         |
| 486783.8418                   | -1760.552174                      | 1.837689088                   | -731.9978637              | 0.003436387                                    | 773.6095338                         |
| 490789.4446                   | -2075.193019                      | 1.834638137                   | -1187.351379              | 0.00670281                                     | 782.4656992                         |
| 546460.7496                   | -1770.906696                      | 2.235894847                   | -678.0499349              | 0.001578716                                    | 871.1945161                         |
| 376145.7399                   | -1534.417376                      | 2.20860564                    | -732.1088718              | 0.003877996                                    | 600.5136593                         |
| 543442.0989                   | -1691.941755                      | 3.351704885                   | -373.3647893              | 0.000871479                                    | 890.7632503                         |
| 782268.0974                   | -1843.435262                      | 1.843122838                   | -1266.900709              | 0.001832962                                    | 1246.740462                         |
| 634270.7325                   | -2108.742067                      | 1.819394831                   | -1086.248995              | 0.001045394                                    | 1011.846594                         |
| 278173.7164                   | -2524.457374                      | 2.696029435                   | -1903.396517              | 0.002244394                                    | 445.4581055                         |
| 689772.6607                   | -1855.424267                      | 1.715965911                   | -648.0552385              | 0.002535277                                    | 1096.101391                         |
| 369745.8087                   | -1340.28122                       | 2.796218974                   | -545.1786486              | 0.001734894                                    | 593.5840864                         |
| 564052.1958                   | -1750.464558                      | 1.964455613                   | -746.3287916              | 0.002269357                                    | 898.700363                          |
| 562970.0625                   | -1939.033628                      | 1.696433933                   | -858.9887447              | 0.000957344                                    | 895.9331792                         |
| 361415.0538                   | -1303.825833                      | 2.415501192                   | -335.4025976              | 0.00077747                                     | 582.2558622                         |
| 442899.4157                   | -1508.947846                      | 3.407782757                   | -342.7775734              | 0.002414539                                    | 731.5178105                         |
| 513127.1849                   | -1815.608618                      | 1.72272179                    | -831.9713597              | 0.009753446                                    | 818.3686754                         |
| 789499.5903                   | -2175.081169                      | 1.630514646                   | -926.8919893              | 0.001028714                                    | 1262.132896                         |
| 207022.7123                   | -1993.778074                      | 2.630840262                   | -1440.564537              | 0.004786187                                    | 330.4659317                         |
| 675320.7711                   | -2000.555717                      | 1.708597555                   | -807.5275077              | 0.001176395                                    | 1075.138737                         |
| 461528.9381                   | -1836.344907                      | 2.088627639                   | -1014.980685              | 0.007033024                                    | 736.6880617                         |
| 420654.4401                   | -1666.356445                      | 2.074918205                   | -821.5248958              | 0.000907508                                    | 672.2182762                         |
| 594444.7464                   | -1734.400702                      | 1.967077846                   | -570.1743241              | 0.001963679                                    | 948.0216372                         |
| 558395.9649                   | -1917.424443                      | 1.774559197                   | -896.1997874              | 0.002381411                                    | 888.7285946                         |
| 514057.2602                   | -1720.634247                      | 2.144391668                   | -578.3229692              | 0.001098163                                    | 825.2173939                         |
| 464489.4044                   | -1577.454259                      | 2.884239859                   | -464.6740251              | 0.001073669                                    | 750.4678417                         |
| 494951.0191                   | -1464.281153                      | 2.756341331                   | -306.4075459              | 0.000764479                                    | 801.9584348                         |
| 552017.1256                   | -2103.997842                      | 2.01940896                    | -1174.609574              | 0.001430281                                    | 881.1780889                         |
| 407357.0871                   | -1977.072566                      | 1.951410533                   | -1118.894492              | 0.00324528                                     | 649.3495775                         |
| 343472.6561                   | -1656.745104                      | 2.02342208                    | -903.6678592              | 0.005491008                                    | 548.8780719                         |
| 535358.2241                   | -2025.113241                      | 1.89616498                    | -981.5649605              | 0.001640457                                    | 853.05849                           |
| 204653.5364                   | -1348.230133                      | 2.743982752                   | -759.7249899              | 0.000794029                                    | 328.2237316                         |
| 859301.3978                   | -2084.222694                      | 1.926525978                   | -882.5114116              | 0.005393617                                    | 1369.496986                         |
| 57187.699                     | -2105.15453                       | 2.070214532                   | -1172.315406              | 0.0024814                                      | 888.6457695                         |
| 606218.5117                   | -1825.767256                      | 2.06798659                    | -797.0439537              | 0.001084003                                    | 968.9099386                         |
| 255273.9532                   | -1986.726001                      | 3.09495752                    | -1480.357566              | 0.010209862                                    | 410.9639482                         |
| 406246.059                    | -1457.966179                      | 2.134019774                   | -542.5164678              | 0.001119059                                    | 648.5653671                         |
| 306722.1451                   | -1300.631285                      | 2.626759942                   | -522.3835963              | 0.000928933                                    | 491.5100592                         |
| 485014.59                     | -1743.965882                      | 1.800213812                   | -791.329316               | 0.006834404                                    | 773.1405902                         |
| 396940.5189                   | -1930.449174                      | 2.399053937                   | -1112.245811              | 0.001305989                                    | 635.518305                          |
| 647154.8057                   | -2062.95404                       | 1.847057331                   | -840.6433423              | 0.011470968                                    | 1037.923195                         |
| 190895.4963                   | -2010.994234                      | 2.901110895                   | -1531.117984              | 0.044384032                                    | 303.7732488                         |
| 633240.7194                   | -1842.968363                      | 2.004518916                   | -613.0151134              | 0.001775186                                    | 1016.842791                         |
| 575624.9119                   | -1711.908841                      | 2.062958393                   | -609.7436115              | 0.002829489                                    | 921.0346293                         |
| 509103.9543                   | -1752.851576                      | 2.050221172                   | -735.445326               | 0.001534472                                    | 809.7396755                         |
| 495327.6328                   | -1632.767745                      | 2.268484282                   | -597.9793334              | 0.000791897                                    | 793.724212                          |
| 415949.1588                   | -1443.947778                      | 2.430693437                   | -425.2236003              | 0.000562694                                    | 668.8394779                         |
| 808423.5186                   | -2068.259232                      | 1.819129263                   | -917.870458               | 0.008663233                                    | 1296.062074                         |
| 645256.1667                   | -2078.210901                      | 2.244025613                   | -1180.430427              | 0.003047833                                    | 1027.144412                         |
| 408283.8614                   | -1927.637508                      | 2.322304269                   | -1254.998992              | 0.012262045                                    | 653.8847123                         |
| 218635.3873                   | -2079.987993                      | 2.568404985                   | -1553.165063              | 0.006048823                                    | 349.8915404                         |
| 466300.2009                   | -1376.177686                      | 2.965568985                   | -259.5508412              | 0.001983498                                    | 752.9449701                         |



| wavelet.LLL_glrIm_LowGrayLevelRunEmphasis | wavelet.LLL_glrIm_GrayLevelNonUniformityNormalized | wavelet.LLL_glrIm_RunVariance | wavelet.LLL_glrIm_GrayLevelNonUniformity | wavelet.LLL_glrIm_LongRunEmphasis |
|-------------------------------------------|----------------------------------------------------|-------------------------------|------------------------------------------|-----------------------------------|
| 0.002040567                               | 0.012995453                                        | 0.020427586                   | 9.006470695                              | 1.058609119                       |
| 0.001179443                               | 0.016243965                                        | 0.042683944                   | 32.88046134                              | 1.119477067                       |
| 0.010312863                               | 0.017892044                                        | 0.020031899                   | 7.615071183                              | 1.060053333                       |
| 0.002385291                               | 0.00963736                                         | 0.019266616                   | 24.94929538                              | 1.055417282                       |
| 0.008129377                               | 0.017071261                                        | 0.015213475                   | 6.038018098                              | 1.045788568                       |
| 0.0038094                                 | 0.013088701                                        | 0.015562998                   | 8.293130567                              | 1.04554451                        |
| 0.009745732                               | 0.027815476                                        | 0.037137911                   | 9.095201663                              | 1.101116433                       |
| 0.002466374                               | 0.010595029                                        | 0.014515435                   | 10.4686518                               | 1.042938211                       |
| 0.001717239                               | 0.010473749                                        | 0.017997063                   | 21.40445587                              | 1.053031539                       |
| 0.00061996                                | 0.012601594                                        | 0.025110325                   | 38.12108728                              | 1.074135831                       |
| 0.003347913                               | 0.013711639                                        | 0.016576973                   | 11.16462067                              | 1.048439262                       |
| 0.001189529                               | 0.011525659                                        | 0.023186417                   | 16.72127398                              | 1.066793119                       |
| 0.001197442                               | 0.012291135                                        | 0.019687574                   | 25.03423845                              | 1.056696433                       |
| 0.002110492                               | 0.011729501                                        | 0.015646979                   | 12.9304102                               | 1.044268752                       |
| 0.002527612                               | 0.012509669                                        | 0.019783139                   | 11.18651992                              | 1.05787649                        |
| 0.000597722                               | 0.040294584                                        | 0.131383573                   | 256.5098223                              | 1.327932358                       |
| 0.003949683                               | 0.012028775                                        | 0.012790188                   | 8.29265487                               | 1.038083653                       |
| 0.001266953                               | 0.011848905                                        | 0.025673524                   | 27.01162867                              | 1.07250626                        |
| 0.003083307                               | 0.012340592                                        | 0.014143553                   | 7.082570597                              | 1.042592487                       |
| 0.000730267                               | 0.012901347                                        | 0.055820353                   | 34.63194413                              | 1.145746845                       |
| 0.000686483                               | 0.021320433                                        | 0.069016286                   | 106.2226458                              | 1.16971482                        |
| 0.001464857                               | 0.013706045                                        | 0.023419785                   | 23.05191954                              | 1.069615034                       |
| 0.001109345                               | 0.014553725                                        | 0.030115093                   | 38.76042447                              | 1.082088296                       |
| 0.004235545                               | 0.011611168                                        | 0.012798397                   | 5.515353455                              | 1.038347287                       |
| 0.001243944                               | 0.016202424                                        | 0.028048468                   | 19.01176031                              | 1.081277669                       |
| 0.003825626                               | 0.012441012                                        | 0.022162856                   | 8.446422908                              | 1.067261151                       |
| 0.000945379                               | 0.015155191                                        | 0.042318481                   | 50.59036305                              | 1.120804116                       |
| 0.001047053                               | 0.016364967                                        | 0.026123362                   | 22.8873812                               | 1.076279858                       |
| 0.002017969                               | 0.01026263                                         | 0.019331871                   | 17.78419086                              | 1.057085563                       |
| 0.001081706                               | 0.020463688                                        | 0.07148471                    | 49.36037211                              | 1.183794189                       |
| 0.000562409                               | 0.016749702                                        | 0.026267572                   | 51.95680571                              | 1.076799425                       |
| 0.000495384                               | 0.012934812                                        | 0.034573793                   | 74.5174446                               | 1.094554187                       |
| 0.002916155                               | 0.009656316                                        | 0.018948228                   | 19.29439897                              | 1.054286404                       |
| 0.014904212                               | 0.030095227                                        | 0.014784972                   | 3.083694107                              | 1.045340645                       |
| 0.004581934                               | 0.013773404                                        | 0.013203                      | 4.51240064                               | 1.040244269                       |
| 0.003899519                               | 0.01009977                                         | 0.014633035                   | 20.1172139                               | 1.043233863                       |
| 0.000548683                               | 0.014736942                                        | 0.028143265                   | 41.33942047                              | 1.082630289                       |
| 0.000803505                               | 0.012273302                                        | 0.029245066                   | 40.14698007                              | 1.080856986                       |
| 0.004740851                               | 0.011288409                                        | 0.017689865                   | 9.262498665                              | 1.053525881                       |
| 0.002421974                               | 0.010748514                                        | 0.01585686                    | 11.10836064                              | 1.046273247                       |
| 0.001549258                               | 0.011975492                                        | 0.032848254                   | 17.12703282                              | 1.095301911                       |
| 0.002861922                               | 0.012064191                                        | 0.014134294                   | 11.34226167                              | 1.04174015                        |
| 0.003684057                               | 0.010788015                                        | 0.014917621                   | 17.4667026                               | 1.043615555                       |
| 0.003451827                               | 0.011443848                                        | 0.01571075                    | 11.56368022                              | 1.044817017                       |
| 0.001935583                               | 0.012342188                                        | 0.018267075                   | 22.76294071                              | 1.055323037                       |
| 0.001119297                               | 0.017408139                                        | 0.031931559                   | 37.71998081                              | 1.090337015                       |
| 0.000744703                               | 0.010387869                                        | 0.02411543                    | 43.3457675                               | 1.069438779                       |
| 0.002829104                               | 0.013629825                                        | 0.014911993                   | 7.829954798                              | 1.04500948                        |
| 0.018614211                               | 0.026026397                                        | 0.021220129                   | 3.414130739                              | 1.065512241                       |
| 0.004928902                               | 0.016438572                                        | 0.021076909                   | 8.008157279                              | 1.062222965                       |
| 0.003480139                               | 0.012853696                                        | 0.032558718                   | 42.81053502                              | 1.089798442                       |
| 0.006746715                               | 0.011477365                                        | 0.012649426                   | 9.373559147                              | 1.038208075                       |
| 0.001618225                               | 0.010586538                                        | 0.032760908                   | 39.28677473                              | 1.093139814                       |
| 0.003902183                               | 0.0133507                                          | 0.020704227                   | 7.733129979                              | 1.061838691                       |
| 0.000883927                               | 0.033544195                                        | 0.080552017                   | 206.5266474                              | 1.206504668                       |
| 0.001838493                               | 0.008988511                                        | 0.013306007                   | 7.799967911                              | 1.039477641                       |
| 0.001051333                               | 0.009584154                                        | 0.015845836                   | 20.70914947                              | 1.046171516                       |
| 0.002275197                               | 0.014457136                                        | 0.020820166                   | 18.31764782                              | 1.062618235                       |
| 0.002542375                               | 0.013092366                                        | 0.035215485                   | 10.346867                                | 1.096481574                       |
| 0.001738238                               | 0.01344615                                         | 0.019149249                   | 11.63676924                              | 1.055971321                       |
| 0.00227553                                | 0.011370649                                        | 0.019483467                   | 23.66106742                              | 1.056599911                       |
| 0.000967652                               | 0.009814732                                        | 0.025328189                   | 52.53209387                              | 1.073027418                       |
| 0.000784473                               | 0.017372554                                        | 0.041458393                   | 51.80331627                              | 1.116510864                       |
| 0.002457426                               | 0.02518553                                         | 0.082579594                   | 64.93516964                              | 1.206973893                       |
| 0.009771265                               | 0.015376956                                        | 0.014545899                   | 3.29083011                               | 1.042934499                       |
| 0.001032067                               | 0.012215859                                        | 0.024884322                   | 18.55141894                              | 1.071205087                       |
| 0.004799743                               | 0.01788331                                         | 0.017964279                   | 6.922162594                              | 1.054229019                       |
| 0.001184161                               | 0.011501508                                        | 0.0257677                     | 35.9807494                               | 1.070420593                       |
| 0.00706056                                | 0.012693352                                        | 0.014339001                   | 5.58795601                               | 1.040855349                       |
| 0.000912188                               | 0.011130201                                        | 0.021344994                   | 21.95046053                              | 1.061251165                       |
| 0.001970079                               | 0.012394457                                        | 0.024358823                   | 36.87475532                              | 1.068958608                       |
| 0.002394752                               | 0.010488982                                        | 0.015280951                   | 12.07669212                              | 1.044019136                       |
| 0.001104332                               | 0.018749741                                        | 0.05121776                    | 93.37480367                              | 1.130145105                       |
| 0.001085898                               | 0.023441025                                        | 0.060324157                   | 150.4098894                              | 1.157378556                       |
| 0.00077481                                | 0.015160529                                        | 0.049145963                   | 133.377495                               | 1.138996851                       |
| 0.00143462                                | 0.010148267                                        | 0.011031191                   | 11.20373439                              | 1.032952055                       |
| 0.003279975                               | 0.01135393                                         | 0.017077925                   | 12.46917845                              | 1.051749543                       |
| 0.005511331                               | 0.013291382                                        | 0.013116575                   | 8.003516069                              | 1.039446543                       |
| 0.001650054                               | 0.010191805                                        | 0.018302655                   | 17.67645895                              | 1.052957907                       |
| 0.000800027                               | 0.016106432                                        | 0.02722707                    | 44.67959874                              | 1.079996249                       |
| 0.005429741                               | 0.009727519                                        | 0.009921048                   | 4.855566111                              | 1.029529574                       |
| 0.002502999                               | 0.010108833                                        | 0.013319895                   | 13.38643234                              | 1.0388802                         |
| 0.001087438                               | 0.009205267                                        | 0.019107088                   | 25.23592309                              | 1.056436309                       |
| 0.001262446                               | 0.023454866                                        | 0.018076151                   | 3.343530789                              | 1.0533591                         |
| 0.001127098                               | 0.013289576                                        | 0.021820729                   | 44.17864512                              | 1.062560281                       |
| 0.000939633                               | 0.013011143                                        | 0.034213312                   | 69.0412263                               | 1.099412714                       |
| 0.006915721                               | 0.011891974                                        | 0.015332766                   | 9.11399747                               | 1.046031444                       |
| 0.001311774                               | 0.011179338                                        | 0.017457439                   | 17.0613039                               | 1.051701883                       |
| 0.011532885                               | 0.018934819                                        | 0.023195047                   | 3.394664981                              | 1.066577361                       |
| 0.045379824                               | 0.028698106                                        | 0.013910019                   | 2.971357789                              | 1.042769355                       |
| 0.001790718                               | 0.013559217                                        | 0.040436727                   | 52.18783858                              | 1.107894095                       |
| 0.002831994                               | 0.011111239                                        | 0.012748966                   | 7.746304212                              | 1.038361955                       |
| 0.001540955                               | 0.010548968                                        | 0.024720318                   | 10.53600398                              | 1.07192348                        |
| 0.000798208                               | 0.012616068                                        | 0.039630992                   | 50.01865166                              | 1.104696019                       |
| 0.00056731                                | 0.016777874                                        | 0.03696714                    | 94.42031073                              | 1.101877779                       |
| 0.008671543                               | 0.011310627                                        | 0.009422863                   | 2.834671461                              | 1.028698014                       |
| 0.003072443                               | 0.011097066                                        | 0.021015591                   | 13.2228101                               | 1.062635521                       |
| 0.012271781                               | 0.024469704                                        | 0.009374055                   | 2.981751093                              | 1.028787664                       |
| 0.006116939                               | 0.018166892                                        | 0.020108509                   | 6.752661884                              | 1.060042911                       |
| 0.001985745                               | 0.014754078                                        | 0.026884618                   | 11.6271745                               | 1.076101237                       |

| wavelet.LLL_glrIm_ShortRunHighGrayLevelEmphasis | wavelet.LLL_glrIm_RunLengthNonUniformity | wavelet.LLL_glrIm_ShortRunEmphasis | wavelet.LLL_glrIm_LongRunHighGrayLevelEmphasis | wavelet.LLL_glrIm_RunPercentage |
|-------------------------------------------------|------------------------------------------|------------------------------------|------------------------------------------------|---------------------------------|
| 5325.178908                                     | 668.759521                               | 0.986414536                        | 5890.800844                                    | 0.981586402                     |
| 7146.044964                                     | 1867.974356                              | 0.973592159                        | 8628.919516                                    | 0.963816155                     |
| 1936.949066                                     | 409.5317661                              | 0.98538938                         | 2104.649446                                    | 0.98068061                      |
| 5577.259049                                     | 2502.213366                              | 0.987090812                        | 6068.816037                                    | 0.982455116                     |
| 1995.532359                                     | 343.460009                               | 0.988796362                        | 2097.773301                                    | 0.985215342                     |
| 2657.691562                                     | 615.7714678                              | 0.989154611                        | 2860.085119                                    | 0.985404953                     |
| 665.6470288                                     | 309.1265565                              | 0.9782569                          | 727.6621142                                    | 0.970098151                     |
| 3889.714515                                     | 961.2400291                              | 0.989611833                        | 4122.481917                                    | 0.986104714                     |
| 4861.61208                                      | 1976.082781                              | 0.987288886                        | 5289.993067                                    | 0.982979983                     |
| 6432.966652                                     | 2887.39466                               | 0.982336784                        | 7151.202905                                    | 0.976461241                     |
| 2549.485019                                     | 790.0880197                              | 0.988525932                        | 2713.466264                                    | 0.984559576                     |
| 6541.21707                                      | 1392.474064                              | 0.98445433                         | 7218.847398                                    | 0.978926606                     |
| 3632.567527                                     | 1966.719575                              | 0.986735817                        | 3907.216509                                    | 0.982048809                     |
| 3465.23683                                      | 1073.124125                              | 0.989795228                        | 3669.160746                                    | 0.986032751                     |
| 3420.858854                                     | 862.6026073                              | 0.986301249                        | 3653.670479                                    | 0.981592502                     |
| 8491.109807                                     | 5463.022256                              | 0.94095381                         | 12916.28711                                    | 0.915270565                     |
| 3043.788384                                     | 672.7234729                              | 0.990729732                        | 3212.530615                                    | 0.987657042                     |
| 5736.157683                                     | 2183.257186                              | 0.98353966                         | 6487.675391                                    | 0.977503628                     |
| 3564.131232                                     | 558.1814856                              | 0.989501826                        | 3777.170578                                    | 0.986122125                     |
| 6427.00449                                      | 2489.267439                              | 0.970902427                        | 8084.092645                                    | 0.958146816                     |
| 5265.634614                                     | 4592.706944                              | 0.968602506                        | 6883.332777                                    | 0.953395571                     |
| 3658.416958                                     | 1609.845293                              | 0.983321108                        | 4020.537763                                    | 0.977862254                     |
| 5348.496523                                     | 2540.790584                              | 0.982075615                        | 6144.497429                                    | 0.975100696                     |
| 3514.784152                                     | 463.3345295                              | 0.990595417                        | 3668.153361                                    | 0.987525988                     |
| 4957.901385                                     | 1116.678939                              | 0.981116839                        | 5588.344297                                    | 0.974571394                     |
| 4671.101486                                     | 649.8121682                              | 0.983436839                        | 5161.804943                                    | 0.978275327                     |
| 3835.138431                                     | 3106.383791                              | 0.972614027                        | 4511.006826                                    | 0.963092015                     |
| 4719.209981                                     | 1333.971356                              | 0.982037446                        | 5230.027905                                    | 0.975951474                     |
| 4756.617043                                     | 1672.207117                              | 0.986380505                        | 5078.048616                                    | 0.981826106                     |
| 7737.503874                                     | 2198.257112                              | 0.964278585                        | 10269.5215                                     | 0.948526297                     |
| 6237.765281                                     | 2957.413761                              | 0.981896064                        | 6908.304002                                    | 0.975754349                     |
| 6933.287464                                     | 5460.962744                              | 0.979540728                        | 8026.405139                                    | 0.971435984                     |
| 5602.004052                                     | 1932.745644                              | 0.987395326                        | 6080.7471                                      | 0.98282219                      |
| 959.2211447                                     | 99.45131038                              | 0.988664839                        | 1010.993312                                    | 0.985207101                     |
| 3088.054507                                     | 318.9843212                              | 0.989938933                        | 3245.640379                                    | 0.986793327                     |
| 3782.600674                                     | 1937.808209                              | 0.989580568                        | 4010.301085                                    | 0.986062452                     |
| 8310.205905                                     | 2665.008325                              | 0.980512639                        | 9310.209807                                    | 0.973985043                     |
| 5716.357522                                     | 3120.388276                              | 0.982065819                        | 6467.776457                                    | 0.975230494                     |
| 3297.178514                                     | 792.552221                               | 0.986830483                        | 3499.11935                                     | 0.982680792                     |
| 5386.910907                                     | 1003.943357                              | 0.989014842                        | 5864.35513                                     | 0.985187358                     |
| 5245.982722                                     | 1349.353285                              | 0.977916457                        | 6124.368137                                    | 0.970253627                     |
| 3330.537486                                     | 915.450494                               | 0.989930818                        | 3522.463004                                    | 0.9865203                       |
| 3373.482086                                     | 1575.494979                              | 0.989631269                        | 3563.802564                                    | 0.986039539                     |
| 3029.018905                                     | 983.1984941                              | 0.98960674                         | 3213.286914                                    | 0.985816135                     |
| 2753.223422                                     | 1778.811722                              | 0.98633422                         | 2927.564503                                    | 0.982059474                     |
| 4311.276846                                     | 2055.448522                              | 0.979760493                        | 4994.452413                                    | 0.97234498                      |
| 5709.370944                                     | 3998.676931                              | 0.983855293                        | 6327.531846                                    | 0.978127592                     |
| 3452.145398                                     | 557.8365315                              | 0.988898637                        | 3678.969452                                    | 0.985354268                     |
| 1367.030023                                     | 125.6216576                              | 0.983621194                        | 1421.554159                                    | 0.978760046                     |
| 1882.427899                                     | 468.5190519                              | 0.985155812                        | 2001.748937                                    | 0.980188825                     |
| 4337.678808                                     | 3162.70094                               | 0.980280333                        | 5070.799924                                    | 0.972659058                     |
| 2960.280115                                     | 796.5676461                              | 0.99055337                         | 3115.311277                                    | 0.987536043                     |
| 6028.483745                                     | 3509.768212                              | 0.978806134                        | 6976.102717                                    | 0.971211725                     |
| 3361.154926                                     | 556.6334716                              | 0.984984713                        | 3668.129769                                    | 0.980085904                     |
| 7807.02329                                      | 5555.05575                               | 0.960366873                        | 10434.71994                                    | 0.943065366                     |
| 6601.316281                                     | 846.1104965                              | 0.99042679                         | 7015.523455                                    | 0.987223243                     |
| 5698.690949                                     | 2099.775251                              | 0.989081065                        | 6075.867542                                    | 0.985302887                     |
| 2227.337753                                     | 1217.217042                              | 0.984750314                        | 2355.716751                                    | 0.979891725                     |
| 5902.882172                                     | 748.1763508                              | 0.979087978                        | 7088.035779                                    | 0.970799471                     |
| 5495.161273                                     | 836.0774941                              | 0.98680689                         | 5927.778684                                    | 0.982275386                     |
| 5205.592191                                     | 2008.823163                              | 0.986656232                        | 5734.254083                                    | 0.98199441                      |
| 5784.075163                                     | 5118.073331                              | 0.983015493                        | 6499.363988                                    | 0.977055073                     |
| 5388.764044                                     | 2788.526989                              | 0.974269691                        | 6418.727378                                    | 0.964824496                     |
| 5925.57145                                      | 2330.942504                              | 0.961184401                        | 7811.378874                                    | 0.943525899                     |
| 8361.928593                                     | 208.2513457                              | 0.989669536                        | 3654.316895                                    | 0.986175115                     |
| 1124.002722                                     | 1454.634183                              | 0.983624913                        | 9157.023931                                    | 0.977760166                     |
| 1886.184932                                     | 373.6650568                              | 0.986665905                        | 2031.918606                                    | 0.982428739                     |
| 5951.344157                                     | 3004.711666                              | 0.98462378                         | 6733.545407                                    | 0.978465388                     |
| 2728.493317                                     | 429.4656732                              | 0.990568059                        | 2873.961035                                    | 0.987064505                     |
| 5276.366248                                     | 1899.600185                              | 0.985778537                        | 5756.633687                                    | 0.980683166                     |
| 6332.340043                                     | 2854.421827                              | 0.984255365                        | 7104.312946                                    | 0.978567814                     |
| 4249.709811                                     | 1083.131252                              | 0.989653039                        | 4572.667256                                    | 0.985964434                     |
| 6023.450817                                     | 4660.784737                              | 0.974573869                        | 7440.955925                                    | 0.963086449                     |
| 6545.404295                                     | 5906.481798                              | 0.968304667                        | 8363.523826                                    | 0.955032758                     |
| 7360.315984                                     | 8114.635187                              | 0.969177693                        | 8956.683846                                    | 0.958161555                     |
| 5123.884267                                     | 1080.600179                              | 0.991917814                        | 5360.283757                                    | 0.989247312                     |
| 3076.188116                                     | 1061.761747                              | 0.987219945                        | 3301.852986                                    | 0.98319675                      |
| 2757.264343                                     | 586.8505964                              | 0.99028153                         | 2914.4897                                      | 0.987137453                     |
| 4875.03984                                      | 1678.692131                              | 0.987583313                        | 5301.858685                                    | 0.983211233                     |
| 4201.651795                                     | 2638.717288                              | 0.981055479                        | 4691.729554                                    | 0.974701335                     |
| 5674.78486                                      | 489.73886                                | 0.992788547                        | 5975.017288                                    | 0.990384615                     |
| 4050.49626                                      | 1292.061701                              | 0.990703885                        | 4265.906293                                    | 0.987494981                     |
| 7183.356056                                     | 2645.056289                              | 0.986454415                        | 7756.712918                                    | 0.981898832                     |
| 1390.117991                                     | 137.8763667                              | 0.987279573                        | 1435.685913                                    | 0.983023873                     |
| 5256.315752                                     | 3199.184283                              | 0.985447725                        | 5784.003971                                    | 0.98030987                      |
| 4778.181078                                     | 4992.990863                              | 0.97689823                         | 5462.573302                                    | 0.969011631                     |
| 4150.357149                                     | 743.8640647                              | 0.988719453                        | 4482.151654                                    | 0.9850702                       |
| 4788.419311                                     | 1476.580448                              | 0.987524676                        | 5130.041772                                    | 0.98334655                      |
| 4153.043633                                     | 172.367125                               | 0.984815501                        | 4629.490398                                    | 0.979403111                     |
| 840.024686                                      | 100.6861626                              | 0.989307661                        | 880.3918669                                    | 0.986080586                     |
| 5929.912468                                     | 3627.639073                              | 0.977367643                        | 7041.076774                                    | 0.968069666                     |
| 6012.55247                                      | 679.8662904                              | 0.990532845                        | 6414.367805                                    | 0.987470037                     |
| 5826.543929                                     | 955.2125641                              | 0.983092532                        | 6552.477745                                    | 0.977269306                     |
| 6246.14599                                      | 3744.908954                              | 0.978193743                        | 7362.849025                                    | 0.969174346                     |
| 6420.00973                                      | 5308.50757                               | 0.977734604                        | 7487.574392                                    | 0.969183073                     |
| 4846.836728                                     | 245.9173215                              | 0.992825496                        | 4999.447103                                    | 0.990574643                     |
| 3687.771898                                     | 1144.721655                              | 0.984846996                        | 4022.312781                                    | 0.979883603                     |
| 2015.461645                                     | 119.5913577                              | 0.992803084                        | 2115.672748                                    | 0.990619137                     |
| 1448.164885                                     | 357.6989301                              | 0.985455707                        | 1540.687446                                    | 0.98071849                      |
| 7592.158464                                     | 752.9592411                              | 0.982630361                        | 8541.676483                                    | 0.97645601                      |

| wavelet.LLL_glrmlongRunLowGrayLevelEmphasis | wavelet.LLL_glrmlongRunEntropy | wavelet.LLL_glrmlongRunHighGrayLevelRunEmphasis | wavelet.LLL_glrmlongRunLengthNonUniformityNormalized | wavelet.LLL_glszm_GrayLevelVariance |
|---------------------------------------------|--------------------------------|-------------------------------------------------|------------------------------------------------------|-------------------------------------|
| 0.002063634                                 | 6.546707435                    | 5428.863865                                     | 0.964846981                                          | 882.2396753                         |
| 0.001217111                                 | 6.550057498                    | 7411.450932                                     | 0.932968215                                          | 908.4298908                         |
| 0.010949021                                 | 6.04702812                     | 1969.819068                                     | 0.962067008                                          | 320.5350497                         |
| 0.00245948                                  | 6.936765221                    | 5667.962867                                     | 0.966496961                                          | 1173.634373                         |
| 0.008257601                                 | 6.156941718                    | 2015.947626                                     | 0.970861751                                          | 490.9713198                         |
| 0.003899791                                 | 6.452218694                    | 2696.096176                                     | 0.971751241                                          | 549.9268268                         |
| 0.010318009                                 | 5.537846778                    | 676.5303475                                     | 0.944891443                                          | 188.1987951                         |
| 0.002555187                                 | 6.730097361                    | 3935.427164                                     | 0.972813053                                          | 776.9492274                         |
| 0.001745343                                 | 6.781408579                    | 4943.346029                                     | 0.966893458                                          | 849.5380903                         |
| 0.000634729                                 | 6.631183622                    | 6570.236562                                     | 0.954357504                                          | 557.121815                          |
| 0.00343446                                  | 6.384597891                    | 2580.683071                                     | 0.970199438                                          | 463.600958                          |
| 0.001203796                                 | 6.779798177                    | 6667.799156                                     | 0.959764978                                          | 791.7411511                         |
| 0.001232991                                 | 6.537197001                    | 3684.142269                                     | 0.965540296                                          | 510.2635254                         |
| 0.002175399                                 | 6.568929702                    | 3502.900384                                     | 0.973406404                                          | 581.8315801                         |
| 0.002586654                                 | 6.558580044                    | 3465.262859                                     | 0.964491921                                          | 622.308074                          |
| 0.000650816                                 | 6.028083499                    | 9158.530588                                     | 0.858250156                                          | 890.8375968                         |
| 0.004011006                                 | 6.581469065                    | 3077.349848                                     | 0.975745326                                          | 701.3139581                         |
| 0.001302539                                 | 6.717306052                    | 5873.076032                                     | 0.957608441                                          | 880.6607333                         |
| 0.003113336                                 | 6.562424952                    | 3606.474114                                     | 0.972506985                                          | 660.8683176                         |
| 0.00075396                                  | 6.716977134                    | 6697.408337                                     | 0.927215855                                          | 630.8830074                         |
| 0.000715216                                 | 6.266517651                    | 5512.157088                                     | 0.921903437                                          | 486.3796979                         |
| 0.001501924                                 | 6.443732434                    | 3728.278178                                     | 0.956920888                                          | 429.7094354                         |
| 0.001134812                                 | 6.482909623                    | 5487.944814                                     | 0.953981005                                          | 606.621505                          |
| 0.004316641                                 | 6.631389877                    | 3544.029094                                     | 0.975364216                                          | 841.6939098                         |
| 0.001266304                                 | 6.234823282                    | 5076.14952                                      | 0.951470843                                          | 370.0875594                         |
| 0.004237207                                 | 6.568805616                    | 4767.9697                                       | 0.957005626                                          | 601.7884386                         |
| 0.000994425                                 | 6.458900704                    | 3959.633549                                     | 0.930397197                                          | 403.2345759                         |
| 0.001065642                                 | 6.300488913                    | 4816.430121                                     | 0.953673414                                          | 358.0833732                         |
| 0.002062555                                 | 6.807042723                    | 4819.156677                                     | 0.964739528                                          | 741.0493891                         |
| 0.001105525                                 | 6.44108116                     | 8144.584598                                     | 0.911375866                                          | 925.6243567                         |
| 0.000576776                                 | 6.307551834                    | 6365.727046                                     | 0.953286784                                          | 357.1128854                         |
| 0.000514987                                 | 6.650775476                    | 7123.95761                                      | 0.947819768                                          | 658.4414262                         |
| 0.003041676                                 | 6.950750463                    | 5690.918912                                     | 0.967260012                                          | 1195.768585                         |
| 0.015037061                                 | 5.324433312                    | 969.575581                                      | 0.970430057                                          | 249.4607426                         |
| 0.004632052                                 | 6.379879023                    | 3119.571681                                     | 0.973594                                             | 604.7419906                         |
| 0.004314471                                 | 6.772779087                    | 3826.91995                                      | 0.972791291                                          | 880.4563261                         |
| 0.000560022                                 | 6.483828501                    | 8500.35811                                      | 0.949869226                                          | 472.191638                          |
| 0.000829679                                 | 6.720234096                    | 5849.165198                                     | 0.953893538                                          | 742.5575286                         |
| 0.004925713                                 | 6.679394388                    | 3337.088728                                     | 0.965725789                                          | 698.1966459                         |
| 0.002451423                                 | 6.794749252                    | 5477.92827                                      | 0.971369285                                          | 1055.461409                         |
| 0.001580368                                 | 6.694967005                    | 5408.872737                                     | 0.943395979                                          | 693.4020215                         |
| 0.002918552                                 | 6.580293442                    | 3367.774842                                     | 0.973669898                                          | 748.7745068                         |
| 0.003814688                                 | 6.703951794                    | 3410.497381                                     | 0.972980333                                          | 859.0833769                         |
| 0.00353223                                  | 6.632589054                    | 3064.145238                                     | 0.972948404                                          | 698.1848031                         |
| 0.002038948                                 | 6.524013807                    | 2787.919345                                     | 0.964373699                                          | 522.5260498                         |
| 0.001144651                                 | 6.277061209                    | 4434.602794                                     | 0.948412672                                          | 488.0670753                         |
| 0.000770975                                 | 6.856694529                    | 5824.179613                                     | 0.95824067                                           | 823.1554938                         |
| 0.002860054                                 | 6.451434024                    | 3496.677978                                     | 0.970968402                                          | 587.9056315                         |
| 0.020727034                                 | 5.621474822                    | 1377.93485                                      | 0.957559743                                          | 441.6120562                         |
| 0.005185008                                 | 6.182567102                    | 1904.649604                                     | 0.961568191                                          | 415.1282311                         |
| 0.003666021                                 | 6.616418044                    | 4466.427086                                     | 0.949528989                                          | 718.8588792                         |
| 0.006922959                                 | 6.608346688                    | 2991.229353                                     | 0.975259721                                          | 741.6498461                         |
| 0.001780415                                 | 6.907095568                    | 6201.352757                                     | 0.945659566                                          | 834.0408601                         |
| 0.003999999                                 | 6.486573814                    | 3421.046977                                     | 0.960937155                                          | 582.4470215                         |
| 0.000942548                                 | 6.146479353                    | 8225.826881                                     | 0.902372628                                          | 1002.550327                         |
| 0.001860713                                 | 6.950735071                    | 6680.807936                                     | 0.974965908                                          | 1181.062881                         |
| 0.001076888                                 | 6.879293666                    | 5770.565433                                     | 0.971617905                                          | 970.0496219                         |
| 0.002404594                                 | 6.38717288                     | 2252.543324                                     | 0.960502676                                          | 447.8824075                         |
| 0.002572061                                 | 6.68090446                     | 6110.487454                                     | 0.946672221                                          | 1002.626822                         |
| 0.001751966                                 | 6.522531445                    | 5575.923855                                     | 0.965896891                                          | 623.2595259                         |
| 0.002301638                                 | 6.69585939                     | 5304.463012                                     | 0.96532598                                           | 844.0013226                         |
| 0.001009688                                 | 6.903339255                    | 5916.538648                                     | 0.956137628                                          | 886.8224149                         |
| 0.000814457                                 | 6.430695648                    | 5573.33865                                      | 0.934908234                                          | 601.2528251                         |
| 0.002635821                                 | 6.38508337                     | 6220.71546                                      | 0.904179567                                          | 918.308536                          |
| 0.00984274                                  | 6.300599123                    | 3417.793771                                     | 0.973044194                                          | 784.1613067                         |
| 0.001046001                                 | 6.788817876                    | 8314.5111                                       | 0.957797097                                          | 1218.681276                         |
| 0.004854959                                 | 6.078323967                    | 1915.170992                                     | 0.965245039                                          | 327.4842106                         |
| 0.001216514                                 | 6.761574791                    | 6087.468147                                     | 0.960457006                                          | 992.4200202                         |
| 0.007173267                                 | 6.496520313                    | 2755.290758                                     | 0.975469303                                          | 713.8149631                         |
| 0.000931884                                 | 6.697809433                    | 5365.815482                                     | 0.963141428                                          | 657.5270415                         |
| 0.001997697                                 | 6.709424883                    | 6474.19006                                      | 0.959358185                                          | 901.267234                          |
| 0.00246266                                  | 6.69370792                     | 4311.686896                                     | 0.972992329                                          | 823.7024796                         |
| 0.001132698                                 | 6.506842095                    | 6249.744798                                     | 0.936074809                                          | 807.1807934                         |
| 0.001138457                                 | 6.31808868                     | 6846.40722                                      | 0.920603496                                          | 767.2372842                         |
| 0.000818018                                 | 6.737656557                    | 7648.187279                                     | 0.922253005                                          | 877.2471418                         |
| 0.001452322                                 | 6.783794098                    | 5170.224598                                     | 0.978765255                                          | 858.0854611                         |
| 0.003421395                                 | 6.626753285                    | 3120.825464                                     | 0.966670668                                          | 619.9908954                         |
| 0.00593617                                  | 6.423530057                    | 2788.643443                                     | 0.974524407                                          | 539.7932989                         |
| 0.001690699                                 | 6.772473654                    | 4955.591034                                     | 0.967769116                                          | 823.5244424                         |
| 0.00082555                                  | 6.300722165                    | 4294.987367                                     | 0.951126533                                          | 333.2124683                         |
| 0.005574292                                 | 6.875644377                    | 5733.054114                                     | 0.981075442                                          | 1306.119227                         |
| 0.002590022                                 | 6.80428923                     | 4091.226115                                     | 0.975664209                                          | 855.5515771                         |
| 0.001101596                                 | 6.976104174                    | 7294.257311                                     | 0.964762826                                          | 954.8415369                         |
| 0.010542318                                 | 5.734662167                    | 1399.213738                                     | 0.967046767                                          | 437.7059304                         |
| 0.001160841                                 | 6.536004502                    | 5355.513781                                     | 0.962289107                                          | 619.8919609                         |
| 0.000984613                                 | 6.627896194                    | 4906.345983                                     | 0.940820718                                          | 498.3284333                         |
| 0.007241657                                 | 6.588794415                    | 4215.76516                                      | 0.970522789                                          | 746.0493866                         |
| 0.001335294                                 | 6.719982751                    | 4854.755811                                     | 0.967466226                                          | 639.0685464                         |
| 0.011781408                                 | 6.092527318                    | 4240.344808                                     | 0.961206592                                          | 1046.55201                          |
| 0.049362989                                 | 5.335859358                    | 848.0981222                                     | 0.972179962                                          | 292.7652785                         |
| 0.001856708                                 | 6.7848781                      | 6118.673101                                     | 0.942525256                                          | 1027.767323                         |
| 0.002842053                                 | 6.742911891                    | 6091.721669                                     | 0.975156536                                          | 911.4840308                         |
| 0.001567315                                 | 6.767340308                    | 5962.137503                                     | 0.956300987                                          | 758.4696181                         |
| 0.000825571                                 | 6.787174953                    | 6433.57781                                      | 0.944552808                                          | 793.3122795                         |
| 0.000587405                                 | 6.519520551                    | 6609.426785                                     | 0.943229183                                          | 684.6944124                         |
| 0.008704785                                 | 6.692582553                    | 4877.358803                                     | 0.981154273                                          | 1317.65127                          |
| 0.003173443                                 | 6.800455656                    | 3752.928077                                     | 0.960627824                                          | 974.1845537                         |
| 0.012310727                                 | 5.598780237                    | 2035.503866                                     | 0.981251889                                          | 647.1820988                         |
| 0.006393015                                 | 6.053278842                    | 1466.433442                                     | 0.96222452                                           | 354.2438151                         |
| 0.001995369                                 | 6.513788655                    | 7767.887662                                     | 0.955306369                                          | 803.1219379                         |

| wavelet.LLL_glszm_SmallAreaHighGrayLevelEmphasis | wavelet.LLL_glszm_GrayLevelNonUniformityNormalized | wavelet.LLL_glszm_SizeZoneNonUniformityNormalized | wavelet.LLL_glszm_SizeZoneNonUniformity |
|--------------------------------------------------|----------------------------------------------------|---------------------------------------------------|-----------------------------------------|
| 4184.750379                                      | 0.011803295                                        | 0.706804625                                       | 397.2241993                             |
| 4872.039151                                      | 0.011721262                                        | 0.641052401                                       | 865.4207407                             |
| 1544.55568                                       | 0.01717523                                         | 0.651654774                                       | 217.6526946                             |
| 4671.033465                                      | 0.009054988                                        | 0.721832459                                       | 1526.67565                              |
| 1828.029478                                      | 0.016150678                                        | 0.721620621                                       | 212.1564626                             |
| 2228.364495                                      | 0.013019531                                        | 0.710144311                                       | 377.086629                              |
| 623.957908                                       | 0.024750617                                        | 0.565195062                                       | 127.1688889                             |
| 3321.014115                                      | 0.010713854                                        | 0.718215299                                       | 595.4004825                             |
| 3821.091793                                      | 0.010245961                                        | 0.698586729                                       | 1162.448317                             |
| 4911.321322                                      | 0.012172064                                        | 0.616576107                                       | 1400.860915                             |
| 2179.910778                                      | 0.013578869                                        | 0.691543545                                       | 464.7172619                             |
| 5299.112957                                      | 0.010468916                                        | 0.689909388                                       | 791.326068                              |
| 3033.129309                                      | 0.012272368                                        | 0.66065671                                        | 1072.245841                             |
| 2974.852505                                      | 0.011851061                                        | 0.714781522                                       | 661.887689                              |
| 3031.158849                                      | 0.012144596                                        | 0.684634531                                       | 490.198324                              |
| 5370.258707                                      | 0.014939427                                        | 0.555342137                                       | 1725.448021                             |
| 2663.850964                                      | 0.011715897                                        | 0.743602767                                       | 440.2128378                             |
| 4257.204405                                      | 0.010501686                                        | 0.682034335                                       | 1201.062465                             |
| 3032.12136                                       | 0.012060793                                        | 0.725088745                                       | 351.6680412                             |
| 4695.590745                                      | 0.011127759                                        | 0.637901887                                       | 1187.135411                             |
| 3802.538775                                      | 0.013981962                                        | 0.666489337                                       | 2297.388744                             |
| 2912.475715                                      | 0.013564062                                        | 0.626769642                                       | 809.7863777                             |
| 4082.033391                                      | 0.012264512                                        | 0.69743264                                        | 1439.500969                             |
| 3288.830899                                      | 0.011293733                                        | 0.762975779                                       | 311.2941176                             |
| 3826.595536                                      | 0.01553244                                         | 0.643347946                                       | 565.5028441                             |
| 3471.666956                                      | 0.012149491                                        | 0.612945543                                       | 317.5057915                             |
| 2816.8939                                        | 0.01408271                                         | 0.559696392                                       | 1221.817224                             |
| 3702.365082                                      | 0.015444432                                        | 0.619400502                                       | 647.8929254                             |
| 4170.757219                                      | 0.010302255                                        | 0.664499299                                       | 925.6475233                             |
| 5303.664268                                      | 0.011829034                                        | 0.684139561                                       | 1080.940506                             |
| 4814.884473                                      | 0.016046881                                        | 0.604510775                                       | 1390.374783                             |
| 5279.935686                                      | 0.011461975                                        | 0.647261329                                       | 2757.980521                             |
| 4626.600198                                      | 0.009010957                                        | 0.70807577                                        | 1155.579657                             |
| 869.970291                                       | 0.026927438                                        | 0.695861678                                       | 58.45238095                             |
| 2727.188974                                      | 0.013379225                                        | 0.725790591                                       | 201.7697842                             |
| 3243.750005                                      | 0.010041413                                        | 0.732461028                                       | 1233.464371                             |
| 6375.726843                                      | 0.013906815                                        | 0.604897973                                       | 1243.670233                             |
| 4481.653261                                      | 0.010883845                                        | 0.656150819                                       | 1627.254032                             |
| 2912.952002                                      | 0.01121846                                         | 0.656500204                                       | 430.0076336                             |
| 4309.984126                                      | 0.010067232                                        | 0.771109918                                       | 676.2633979                             |
| 3678.24173                                       | 0.011048518                                        | 0.627144121                                       | 640.9412916                             |
| 2927.304629                                      | 0.011795012                                        | 0.729577626                                       | 579.2846348                             |
| 2947.729899                                      | 0.01072846                                         | 0.72647299                                        | 990.1826853                             |
| 2579.128035                                      | 0.011432373                                        | 0.724253352                                       | 611.9940828                             |
| 2453.937598                                      | 0.012305067                                        | 0.680588136                                       | 1011.35397                              |
| 3096.901057                                      | 0.013901164                                        | 0.659569834                                       | 1050.035176                             |
| 4612.27489                                       | 0.009850935                                        | 0.673425791                                       | 2173.145026                             |
| 2914.964401                                      | 0.013123199                                        | 0.712300766                                       | 341.1920668                             |
| 1418.836381                                      | 0.02237426                                         | 0.670488166                                       | 69.73076923                             |
| 1711.402953                                      | 0.015761629                                        | 0.649612127                                       | 248.1518325                             |
| 3201.763808                                      | 0.01113552                                         | 0.658002494                                       | 1650.928258                             |
| 2542.270174                                      | 0.011251503                                        | 0.746117733                                       | 523.0285307                             |
| 4531.220618                                      | 0.009833724                                        | 0.635064181                                       | 1724.834315                             |
| 2616.368458                                      | 0.013044085                                        | 0.628726881                                       | 281.6696429                             |
| 5252.561285                                      | 0.014161843                                        | 0.628143571                                       | 2274.507871                             |
| 5577.054358                                      | 0.009016209                                        | 0.744244084                                       | 552.2291105                             |
| 4881.621958                                      | 0.009620635                                        | 0.729169646                                       | 1320.526229                             |
| 2077.668425                                      | 0.014063008                                        | 0.64161342                                        | 632.6308316                             |
| 4221.859809                                      | 0.010415034                                        | 0.725358833                                       | 437.3913765                             |
| 4560.902048                                      | 0.012474151                                        | 0.679110366                                       | 471.3025937                             |
| 3950.303707                                      | 0.010498659                                        | 0.694612475                                       | 1162.086671                             |
| 4528.028226                                      | 0.0096528                                          | 0.661773355                                       | 2741.727009                             |
| 3754.6015                                        | 0.013109926                                        | 0.598229434                                       | 1212.012833                             |
| 4194.445852                                      | 0.011989274                                        | 0.62006407                                        | 944.8897638                             |
| 2721.651412                                      | 0.014183762                                        | 0.789483114                                       | 144.4754098                             |
| 6234.932961                                      | 0.009798264                                        | 0.708677256                                       | 844.7432886                             |
| 1554.23799                                       | 0.017484385                                        | 0.670816897                                       | 209.2948718                             |
| 4523.339485                                      | 0.009905442                                        | 0.707899418                                       | 1750.635261                             |
| 2363.759681                                      | 0.012527942                                        | 0.721596504                                       | 269.155496                              |
| 4304.035123                                      | 0.011132584                                        | 0.672640405                                       | 1049.991672                             |
| 4882.107184                                      | 0.010702587                                        | 0.703016653                                       | 1649.277067                             |
| 3438.465807                                      | 0.010630347                                        | 0.747094602                                       | 701.5218317                             |
| 4288.506525                                      | 0.011344135                                        | 0.670473813                                       | 2362.749716                             |
| 4422.730124                                      | 0.013261841                                        | 0.637211203                                       | 2729.812792                             |
| 5104.668034                                      | 0.010607631                                        | 0.570705024                                       | 3194.236019                             |
| 4485.60765                                       | 0.0101761                                          | 0.755887894                                       | 727.9200415                             |
| 2510.688856                                      | 0.011471493                                        | 0.681118455                                       | 606.8765432                             |
| 2314.49545                                       | 0.013078228                                        | 0.71197261                                        | 363.8180039                             |
| 3852.920483                                      | 0.010091042                                        | 0.692128163                                       | 975.9007092                             |
| 3316.857212                                      | 0.015573506                                        | 0.621157882                                       | 1290.144921                             |
| 4901.675499                                      | 0.009731095                                        | 0.812094433                                       | 361.3820225                             |
| 3590.119027                                      | 0.010227075                                        | 0.74382718                                        | 844.9876761                             |
| 5937.889667                                      | 0.00913875                                         | 0.668303013                                       | 1468.261721                             |
| 1433.033285                                      | 0.022294887                                        | 0.692776457                                       | 80.36206897                             |
| 4145.179058                                      | 0.012249787                                        | 0.679639927                                       | 1788.132649                             |
| 3539.070568                                      | 0.012725096                                        | 0.564768896                                       | 2061.971241                             |
| 3283.282782                                      | 0.011329314                                        | 0.725394944                                       | 464.9781591                             |
| 3983.627611                                      | 0.011142444                                        | 0.677428685                                       | 839.3341404                             |
| 3368.884508                                      | 0.015552913                                        | 0.762663496                                       | 110.5862069                             |
| 762.8000646                                      | 0.028393726                                        | 0.701730665                                       | 60.34883721                             |
| 4509.547509                                      | 0.009973341                                        | 0.683307429                                       | 1926.92695                              |
| 4813.143254                                      | 0.010680037                                        | 0.743238472                                       | 442.2268908                             |
| 4460.040035                                      | 0.010718452                                        | 0.66341824                                        | 509.5052083                             |
| 4690.841425                                      | 0.010402668                                        | 0.655192471                                       | 1923.645095                             |
| 4738.674298                                      | 0.012274399                                        | 0.648666131                                       | 2603.097184                             |
| 4601.298736                                      | 0.010798528                                        | 0.791148022                                       | 176.426009                              |
| 3065.318945                                      | 0.010707775                                        | 0.65035055                                        | 606.7770632                             |
| 1713.857767                                      | 0.023834019                                        | 0.797839506                                       | 86.16666667                             |
| 1275.425854                                      | 0.017457562                                        | 0.601731289                                       | 173.2986111                             |
| 5741.292651                                      | 0.012427975                                        | 0.69058589                                        | 418.4950495                             |

| wavelet.LLL_glszm_GrayLevelNonUniformity | wavelet.LLL_glszm_LargeAreaEmphasis | wavelet.LLL_glszm_ZoneVariance | wavelet.LLL_glszm_ZonePercentage | wavelet.LLL_glszm_LargeAreaLowGrayLevelEmphasis |
|------------------------------------------|-------------------------------------|--------------------------------|----------------------------------|-------------------------------------------------|
| 6.633451957                              | 2.131672598                         | 0.553564418                    | 0.796033994                      | 0.002814982                                     |
| 15.8237037                               | 7.200740741                         | 4.833701509                    | 0.649975927                      | 0.002702353                                     |
| 5.736526946                              | 2.155688623                         | 0.46724515                     | 0.769585253                      | 0.020470821                                     |
| 19.15130024                              | 2.236879433                         | 0.684705106                    | 0.802656546                      | 0.003887428                                     |
| 4.74829932                               | 1.87414966                          | 0.383092693                    | 0.818941504                      | 0.011724534                                     |
| 6.913370998                              | 1.757062147                         | 0.29072815                     | 0.825816485                      | 0.00555787                                      |
| 5.568888889                              | 3.382222222                         | 1.138883951                    | 0.667655786                      | 0.025950574                                     |
| 8.881785283                              | 1.758745476                         | 0.297825654                    | 0.827345309                      | 0.004108665                                     |
| 17.04927885                              | 2.018629808                         | 0.45763185                     | 0.8003848                        | 0.002477709                                     |
| 27.65492958                              | 2.678697183                         | 0.819411296                    | 0.733376372                      | 0.001059482                                     |
| 9.125                                    | 1.819940476                         | 0.305429333                    | 0.812575574                      | 0.005150923                                     |
| 12.00784656                              | 2.56320837                          | 0.89377315                     | 0.773954116                      | 0.001729118                                     |
| 19.91805299                              | 2.054220579                         | 0.421242088                    | 0.782545805                      | 0.002006761                                     |
| 10.97408207                              | 1.738660907                         | 0.280982791                    | 0.828264758                      | 0.003369239                                     |
| 8.695530726                              | 2.079608939                         | 0.460743657                    | 0.785949506                      | 0.003943993                                     |
| 46.41680077                              | 82.67814612                         | 77.67881283                    | 0.447243414                      | 0.008647355                                     |
| 6.935810811                              | 1.641891892                         | 0.25172343                     | 0.848137536                      | 0.005314335                                     |
| 18.49346962                              | 2.934696195                         | 1.181064525                    | 0.755145798                      | 0.002173445                                     |
| 5.849484536                              | 1.731958763                         | 0.291958763                    | 0.833333333                      | 0.004017106                                     |
| 20.70875873                              | 9.225685116                         | 6.96034471                     | 0.664405569                      | 0.001932225                                     |
| 48.19582245                              | 24.22686394                         | 21.93006082                    | 0.659839204                      | 0.003706778                                     |
| 17.5247678                               | 2.326625387                         | 0.554347305                    | 0.751162791                      | 0.002428151                                     |
| 25.31395349                              | 3.693313953                         | 1.94256444                     | 0.755767118                      | 0.001886784                                     |
| 4.607843137                              | 1.664215686                         | 0.274359621                    | 0.848232848                      | 0.005980541                                     |
| 13.65301479                              | 2.960182025                         | 1.083998908                    | 0.730066445                      | 0.00202989                                      |
| 6.293436293                              | 2.324324324                         | 0.52934512                     | 0.746397695                      | 0.009967421                                     |
| 30.74255612                              | 5.868071461                         | 3.374206131                    | 0.62983266                       | 0.002788961                                     |
| 16.15487572                              | 2.756214149                         | 0.879366539                    | 0.729937195                      | 0.001715493                                     |
| 14.35104092                              | 1.999282125                         | 0.393867605                    | 0.789235127                      | 0.003086722                                     |
| 18.68987342                              | 19.04303797                         | 16.45460503                    | 0.621557828                      | 0.003216398                                     |
| 36.90782609                              | 2.676086957                         | 0.67682231                     | 0.723497955                      | 0.000995127                                     |
| 48.8394743                               | 4.053977939                         | 2.117171063                    | 0.718549747                      | 0.001070435                                     |
| 14.70588235                              | 2.053308824                         | 0.501513465                    | 0.80275455                       | 0.005123141                                     |
| 2.261904762                              | 1.904761905                         | 0.371882086                    | 0.807692308                      | 0.019783068                                     |
| 3.71942446                               | 1.669064748                         | 0.242844573                    | 0.837349398                      | 0.000664228                                     |
| 16.90973872                              | 1.722090261                         | 0.283230178                    | 0.833663366                      | 0.009510873                                     |
| 28.59241245                              | 2.84922179                          | 0.887042196                    | 0.713888889                      | 0.000934878                                     |
| 26.99193548                              | 3.839516129                         | 2.010478018                    | 0.739415623                      | 0.001547814                                     |
| 7.348091603                              | 1.992366412                         | 0.367228017                    | 0.784431138                      | 0.008227303                                     |
| 8.828962372                              | 1.86659065                          | 0.435880067                    | 0.836034318                      | 0.003191563                                     |
| 11.29158513                              | 4.309197652                         | 2.229054729                    | 0.693351425                      | 0.00277232                                      |
| 9.365239295                              | 1.731738035                         | 0.291133438                    | 0.833158447                      | 0.004073857                                     |
| 14.62289068                              | 1.754952311                         | 0.303661004                    | 0.830085262                      | 0.006199055                                     |
| 9.66035503                               | 1.781065089                         | 0.309653023                    | 0.824390244                      | 0.005193021                                     |
| 18.28532974                              | 2.03230148                          | 0.435122607                    | 0.791267306                      | 0.004122852                                     |
| 22.13065327                              | 4.038944724                         | 2.080351506                    | 0.71454219                       | 0.002051501                                     |
| 31.78896808                              | 2.765416796                         | 1.017809813                    | 0.75644632                       | 0.00137865                                      |
| 6.286012526                              | 1.797494781                         | 0.316116126                    | 0.82161235                       | 0.003767259                                     |
| 2.326923077                              | 2.134615385                         | 0.474482249                    | 0.776119403                      | 0.047560677                                     |
| 6.020942408                              | 2.191099476                         | 0.498375867                    | 0.76861167                       | 0.009820837                                     |
| 27.93901953                              | 5.054603428                         | 3.192232475                    | 0.732768692                      | 0.007398792                                     |
| 7.887303852                              | 1.679029957                         | 0.287235883                    | 0.84764208                       | 0.010424789                                     |
| 26.7083947                               | 3.745581738                         | 1.766359581                    | 0.710808689                      | 0.004594435                                     |
| 5.84375                                  | 2.287946429                         | 0.547667211                    | 0.758037225                      | 0.006302079                                     |
| 51.28003314                              | 38.70947252                         | 35.46430062                    | 0.555112678                      | 0.005950791                                     |
| 6.690026954                              | 1.680592992                         | 0.277230258                    | 0.844141069                      | 0.002408177                                     |
| 17.42297073                              | 1.824958586                         | 0.358599405                    | 0.825809394                      | 0.001607581                                     |
| 13.86612576                              | 2.226166329                         | 0.506503833                    | 0.762567672                      | 0.004992498                                     |
| 6.28026534                               | 4.689883914                         | 2.867607787                    | 0.740786241                      | 0.003869356                                     |
| 8.657060519                              | 2.102305476                         | 0.490795954                    | 0.787741203                      | 0.002357492                                     |
| 17.56425583                              | 2.142857143                         | 0.538614592                    | 0.78952336                       | 0.003173196                                     |
| 39.99155202                              | 2.738112479                         | 0.989819597                    | 0.756297919                      | 0.001851271                                     |
| 26.56071076                              | 5.507403751                         | 3.181251821                    | 0.65566343                       | 0.001857714                                     |
| 18.27165354                              | 26.39829396                         | 23.18704878                    | 0.558037349                      | 0.009538598                                     |
| 2.595628415                              | 1.765027322                         | 0.358923826                    | 0.843317972                      | 0.012238697                                     |
| 11.6795302                               | 2.737416107                         | 1.039991864                    | 0.767546684                      | 0.001525733                                     |
| 5.455128205                              | 1.974358974                         | 0.379643327                    | 0.791878173                      | 0.006669533                                     |
| 24.49615851                              | 3.105135463                         | 1.43390232                     | 0.773537692                      | 0.002019839                                     |
| 4.672922252                              | 1.662198391                         | 0.232474897                    | 0.83632287                       | 0.009565563                                     |
| 17.37796284                              | 2.203074952                         | 0.543417979                    | 0.776230731                      | 0.00142442                                      |
| 25.10826939                              | 2.770673487                         | 1.091517077                    | 0.771710526                      | 0.002910423                                     |
| 9.981895634                              | 1.830670927                         | 0.385042434                    | 0.831709477                      | 0.003687428                                     |
| 39.97673099                              | 9.505107832                         | 7.354440638                    | 0.681888545                      | 0.00257235                                      |
| 56.81372549                              | 14.30812325                         | 11.85045957                    | 0.63787969                       | 0.003409983                                     |
| 59.37091299                              | 7.403251742                         | 4.713112569                    | 0.609694989                      | 0.002249662                                     |
| 9.799584631                              | 1.518172378                         | 0.175172989                    | 0.862903226                      | 0.001840555                                     |
| 10.22109989                              | 1.938271605                         | 0.366639333                    | 0.797672337                      | 0.005896118                                     |
| 6.68297456                               | 1.643835616                         | 0.218825755                    | 0.837704918                      | 0.007544691                                     |
| 14.22836879                              | 2.011347518                         | 0.446186812                    | 0.799319728                      | 0.002527023                                     |
| 32.34617236                              | 2.950409244                         | 1.072836387                    | 0.729796205                      | 0.001509362                                     |
| 4.330337079                              | 1.53258427                          | 0.249837142                    | 0.882936508                      | 0.00759292                                      |
| 11.61795775                              | 1.641725352                         | 0.248244861                    | 0.847129008                      | 0.003886151                                     |
| 20.07783341                              | 2.030040965                         | 0.415047705                    | 0.786891117                      | 0.001546796                                     |
| 2.586206897                              | 1.99137931                          | 0.42887931                     | 0.8                              | 0.016279733                                     |
| 32.22919042                              | 2.278601292                         | 0.617432042                    | 0.775877322                      | 0.001919097                                     |
| 46.45932621                              | 3.761709121                         | 1.512119948                    | 0.666727538                      | 0.002187395                                     |
| 7.262090484                              | 1.819032761                         | 0.34589577                     | 0.823907455                      | 0.011747051                                     |
| 13.8054883                               | 1.93866021                          | 0.369595621                    | 0.798324742                      | 0.00193375                                      |
| 2.255172414                              | 2.393103448                         | 0.800285375                    | 0.792349727                      | 0.017034394                                     |
| 2.441860465                              | 1.779069767                         | 0.288399135                    | 0.819047619                      | 0.107098137                                     |
| 28.1248227                               | 8.138652482                         | 6.151752301                    | 0.709433962                      | 0.003889592                                     |
| 6.354621849                              | 1.67394958                          | 0.266037709                    | 0.842776204                      | 0.003436207                                     |
| 8.231770833                              | 2.736979167                         | 0.966139052                    | 0.75146771                       | 0.00239207                                      |
| 30.54223433                              | 5.059945504                         | 3.119352267                    | 0.717848411                      | 0.00165936                                      |
| 49.25716422                              | 5.432843259                         | 3.339619076                    | 0.691181536                      | 0.001344408                                     |
| 2.408071749                              | 1.448430493                         | 0.161274106                    | 0.881422925                      | 0.010083673                                     |
| 9.990353698                              | 2.287245445                         | 0.588595605                    | 0.767269737                      | 0.005425288                                     |
| 2.574074074                              | 1.472222222                         | 0.175154321                    | 0.87804878                       | 0.014252318                                     |
| 5.027777778                              | 2.09375                             | 0.36196711                     | 0.759894459                      | 0.011889676                                     |
| 7.531353135                              | 2.995049505                         | 1.221669444                    | 0.750929368                      | 0.002770967                                     |

| wavelet.LLL_glszm_LargeAreaHighGrayLevelEmphasis | wavelet.LLL_glszm_HighGrayLevelZoneEmphasis | wavelet.LLL_glszm_SmallAreaEmphasis | wavelet.LLL_glszm_LowGrayLevelZoneEmphasis | wavelet.LLL_glszm_ZoneEntropy |
|--------------------------------------------------|---------------------------------------------|-------------------------------------|--------------------------------------------|-------------------------------|
| 14376.97331                                      | 5013.846975                                 | 0.865809566                         | 0.002410033                                | 7.102815929                   |
| 74380.29259                                      | 6295.12                                     | 0.827008712                         | 0.001556381                                | 7.489292627                   |
| 4511.586826                                      | 1902.383234                                 | 0.834788756                         | 0.00945938                                 | 6.628534702                   |
| 15767.03877                                      | 5412.29078                                  | 0.873875204                         | 0.002621238                                | 7.559768828                   |
| 3449.282313                                      | 2068.465986                                 | 0.87417328                          | 0.00924291                                 | 6.591845744                   |
| 5309.433145                                      | 2606.745763                                 | 0.868483992                         | 0.004127815                                | 6.963905735                   |
| 1943                                             | 744.32                                      | 0.870204863                         | 0.011634043                                | 6.304473776                   |
| 7083.430639                                      | 3866.914355                                 | 0.872744092                         | 0.002541783                                | 7.21987839                    |
| 11504.64784                                      | 4636.668269                                 | 0.861558739                         | 0.001976616                                | 7.417928619                   |
| 19969.65757                                      | 6232.608715                                 | 0.813453929                         | 0.000756419                                | 7.469718757                   |
| 4818.513393                                      | 2553.80506                                  | 0.858171296                         | 0.003657033                                | 6.958861967                   |
| 19970.14473                                      | 6347.643418                                 | 0.856293774                         | 0.00144041                                 | 7.447885876                   |
| 7695.814541                                      | 3644.745533                                 | 0.840306873                         | 0.001337504                                | 7.256782653                   |
| 6213.139309                                      | 3455.99568                                  | 0.870922426                         | 0.002257085                                | 7.097272378                   |
| 7075.458101                                      | 3513.022346                                 | 0.853408209                         | 0.002902788                                | 7.160913164                   |
| 981912.0023                                      | 7420.226585                                 | 0.772966924                         | 0.000959541                                | 7.726526318                   |
| 580.9375                                         | 3015.866554                                 | 0.886413039                         | 0.00432376                                 | 7.049000393                   |
| 23321.76491                                      | 5259.252129                                 | 0.851779463                         | 0.001467787                                | 7.458385118                   |
| 6457.725773                                      | 3524.773196                                 | 0.876531197                         | 0.00351414                                 | 6.977156096                   |
| 91677.03708                                      | 5909.947877                                 | 0.825888617                         | 0.000958551                                | 7.521773576                   |
| 207642.5294                                      | 4724.89208                                  | 0.842714022                         | 0.000890121                                | 7.196406893                   |
| 9194.035604                                      | 3623.971362                                 | 0.819910763                         | 0.00173523                                 | 7.223936637                   |
| 28618.33818                                      | 4961.278585                                 | 0.860234465                         | 0.001316688                                | 7.217313078                   |
| 5606.254902                                      | 3619.345588                                 | 0.895305692                         | 0.004577498                                | 6.983838415                   |
| 17720.76223                                      | 4772.915813                                 | 0.82935495                          | 0.001559308                                | 6.966416                      |
| 12422.82432                                      | 4480.57722                                  | 0.811334191                         | 0.002939423                                | 7.203540469                   |
| 27913.56528                                      | 3729.61246                                  | 0.776594504                         | 0.00120075                                 | 7.488564575                   |
| 14350.11472                                      | 4639.946463                                 | 0.815194244                         | 0.001314836                                | 7.096157465                   |
| 9336.719311                                      | 4891.257717                                 | 0.842609925                         | 0.002309729                                | 7.466000509                   |
| 224333.1316                                      | 6675.294937                                 | 0.851346072                         | 0.001555504                                | 7.389467828                   |
| 18028.65217                                      | 6145.94087                                  | 0.806020892                         | 0.00069156                                 | 7.209791491                   |
| 38637.45787                                      | 6558.383009                                 | 0.831717094                         | 0.000583947                                | 7.514148032                   |
| 13554.77083                                      | 5448.055147                                 | 0.86658926                          | 0.003063838                                | 7.592807151                   |
| 1915.416667                                      | 981.6785714                                 | 0.86026455                          | 0.017536837                                | 5.731486788                   |
| 5140.327338                                      | 3123.482014                                 | 0.876948441                         | 0.005167833                                | 6.741263289                   |
| 6899.423397                                      | 3749.381829                                 | 0.880079506                         | 0.003088491                                | 7.340401762                   |
| 26705.29377                                      | 8122.995136                                 | 0.806129442                         | 0.000695408                                | 7.398305298                   |
| 30808.40282                                      | 5464.907258                                 | 0.837332892                         | 0.000940751                                | 7.53797829                    |
| 6505.169466                                      | 3406.644275                                 | 0.83795335                          | 0.005171156                                | 7.260637737                   |
| 12491.48689                                      | 5046.329532                                 | 0.898606598                         | 0.0027197                                  | 7.226833465                   |
| 32768.42172                                      | 4742.818982                                 | 0.819472038                         | 0.002022479                                | 7.452854813                   |
| 6247.06927                                       | 3325.807305                                 | 0.878705734                         | 0.003135645                                | 7.103803514                   |
| 5918.501834                                      | 3389.623624                                 | 0.877026626                         | 0.003849672                                | 7.25761904                    |
| 5666.63432                                       | 2996.621302                                 | 0.875464497                         | 0.003793238                                | 7.141187318                   |
| 5430.506729                                      | 2841.343876                                 | 0.851588104                         | 0.001986212                                | 7.192375296                   |
| 24727.6407                                       | 3907.084171                                 | 0.838454037                         | 0.001413209                                | 7.138005096                   |
| 20049.96343                                      | 5527.704059                                 | 0.846901682                         | 0.000843361                                | 7.640288648                   |
| 6771.929019                                      | 3402.219207                                 | 0.869451403                         | 0.00325046                                 | 6.93633385                    |
| 2382.173077                                      | 1534.423077                                 | 0.845269765                         | 0.013466005                                | 5.986356425                   |
| 3873.816754                                      | 1981.795812                                 | 0.833674375                         | 0.005127667                                | 6.780610687                   |
| 36743.88721                                      | 3987.60821                                  | 0.838360839                         | 0.003730274                                | 7.419898691                   |
| 4896.35378                                       | 2940.336662                                 | 0.887678097                         | 0.007084669                                | 7.069750208                   |
| 31390.39875                                      | 5672.738954                                 | 0.824395846                         | 0.001468463                                | 7.743532935                   |
| 8660.941964                                      | 3278.328125                                 | 0.820778305                         | 0.004550978                                | 7.056684871                   |
| 430270.3505                                      | 6830.635184                                 | 0.818781406                         | 0.001196403                                | 7.577419196                   |
| 12588.74798                                      | 6432.428571                                 | 0.886493056                         | 0.002048538                                | 7.368098101                   |
| 11239.29376                                      | 5644.425732                                 | 0.878207584                         | 0.001145643                                | 7.451287851                   |
| 4349.675456                                      | 2398.457404                                 | 0.82888881                          | 0.002379627                                | 7.128875353                   |
| 46362.53068                                      | 5126.268657                                 | 0.874863383                         | 0.003220838                                | 7.20861716                    |
| 12686.69741                                      | 5430.304035                                 | 0.850763364                         | 0.002106008                                | 7.185506092                   |
| 14140.89898                                      | 4832.456067                                 | 0.859089413                         | 0.002709177                                | 7.376967908                   |
| 20876.09051                                      | 5528.546223                                 | 0.840508254                         | 0.001056368                                | 7.662875046                   |
| 40430.70286                                      | 4952.36772                                  | 0.801529208                         | 0.001010597                                | 7.469981304                   |
| 206734.8885                                      | 5418.125328                                 | 0.814026283                         | 0.003074763                                | 7.62327606                    |
| 7358.595628                                      | 3139.857923                                 | 0.906677292                         | 0.011097263                                | 6.571470398                   |
| 29508.98154                                      | 7527.731544                                 | 0.865898267                         | 0.001252679                                | 7.46304856                    |
| 4091.240385                                      | 1859.253205                                 | 0.846126246                         | 0.005705444                                | 6.587684818                   |
| 27315.77355                                      | 5475.840679                                 | 0.866035892                         | 0.001349564                                | 7.47773152                    |
| 4665.495979                                      | 2724.844504                                 | 0.874757968                         | 0.007884088                                | 6.897159213                   |
| 13296.39974                                      | 5165.518258                                 | 0.846743397                         | 0.001062467                                | 7.386151367                   |
| 23602.93308                                      | 5902.035806                                 | 0.863360296                         | 0.002374224                                | 7.424413855                   |
| 9382.071353                                      | 4034.089457                                 | 0.88729322                          | 0.002572202                                | 7.183532902                   |
| 89754.60641                                      | 5357.916005                                 | 0.844545445                         | 0.00143519                                 | 7.491256492                   |
| 142346.3782                                      | 5771.77591                                  | 0.824987409                         | 0.001365718                                | 7.464090022                   |
| 70148.73932                                      | 6855.656066                                 | 0.783545681                         | 0.000986595                                | 7.975620565                   |
| 8075.561786                                      | 5089.973001                                 | 0.892992096                         | 0.001565643                                | 7.248482008                   |
| 6401.983165                                      | 3022.090909                                 | 0.85202332                          | 0.003467236                                | 7.207942586                   |
| 4815.019569                                      | 2720.189824                                 | 0.869628724                         | 0.006113726                                | 6.924493176                   |
| 11644.20993                                      | 4659.086525                                 | 0.858163662                         | 0.001848166                                | 7.40226291                    |
| 14274.28021                                      | 4145.933077                                 | 0.816318317                         | 0.000954774                                | 7.152130566                   |
| 10127.69438                                      | 5481.602247                                 | 0.920166199                         | 0.005445212                                | 7.113925862                   |
| 6992.166373                                      | 4051.78169                                  | 0.886382776                         | 0.002538646                                | 7.273531714                   |
| 15599.61265                                      | 7133.645881                                 | 0.844685615                         | 0.001292661                                | 7.677179301                   |
| 2208.327586                                      | 1549.008621                                 | 0.858208812                         | 0.011491556                                | 6.053168526                   |
| 14164.31015                                      | 5042.217788                                 | 0.850657069                         | 0.001265474                                | 7.283541401                   |
| 20905.98932                                      | 4663.650233                                 | 0.780154793                         | 0.001142162                                | 7.656749151                   |
| 8864.926677                                      | 3934.862715                                 | 0.876199285                         | 0.006748999                                | 7.082470977                   |
| 9781.952381                                      | 4761.35109                                  | 0.85004596                          | 0.001512512                                | 7.363002625                   |
| 12448.42759                                      | 3904.744828                                 | 0.892554119                         | 0.013248163                                | 6.388226417                   |
| 1440.104651                                      | 866.5348837                                 | 0.86377584                          | 0.035879611                                | 5.55848347                    |
| 73751.85177                                      | 5474.48156                                  | 0.85211938                          | 0.002136276                                | 7.645074998                   |
| 11572.89244                                      | 5711.761345                                 | 0.885901027                         | 0.003271838                                | 7.185434775                   |
| 21525.23438                                      | 5479.304688                                 | 0.841292908                         | 0.00188165                                 | 7.317632684                   |
| 45444.52486                                      | 5846.652929                                 | 0.836383049                         | 0.000960948                                | 7.629152691                   |
| 47406.61151                                      | 5957.234737                                 | 0.832156084                         | 0.000703676                                | 7.515633448                   |
| 7078.834081                                      | 4944.067265                                 | 0.910469606                         | 0.009598591                                | 6.908200714                   |
| 9873.624866                                      | 3670.721329                                 | 0.834159893                         | 0.003448483                                | 7.438286331                   |
| 3313.416667                                      | 1939.185185                                 | 0.912808642                         | 0.013670641                                | 5.82522428                    |
| 2853.104167                                      | 1529.447917                                 | 0.80396412                          | 0.006629724                                | 6.689783809                   |
| 28121.18152                                      | 7094.805281                                 | 0.856034476                         | 0.002541076                                | 7.150866341                   |
